# Supplementary material for: Derivation of Escherichia coli O157:H7 from Its O55:H7 Precursor
Source: PubMed Central journal article supplement (PMC2806823; doi:10.1371/journal.pone.0008700), 2010-01-14
Supplement: pone.0008700.s001.pdf [file pone.0008700.s001.pdf]

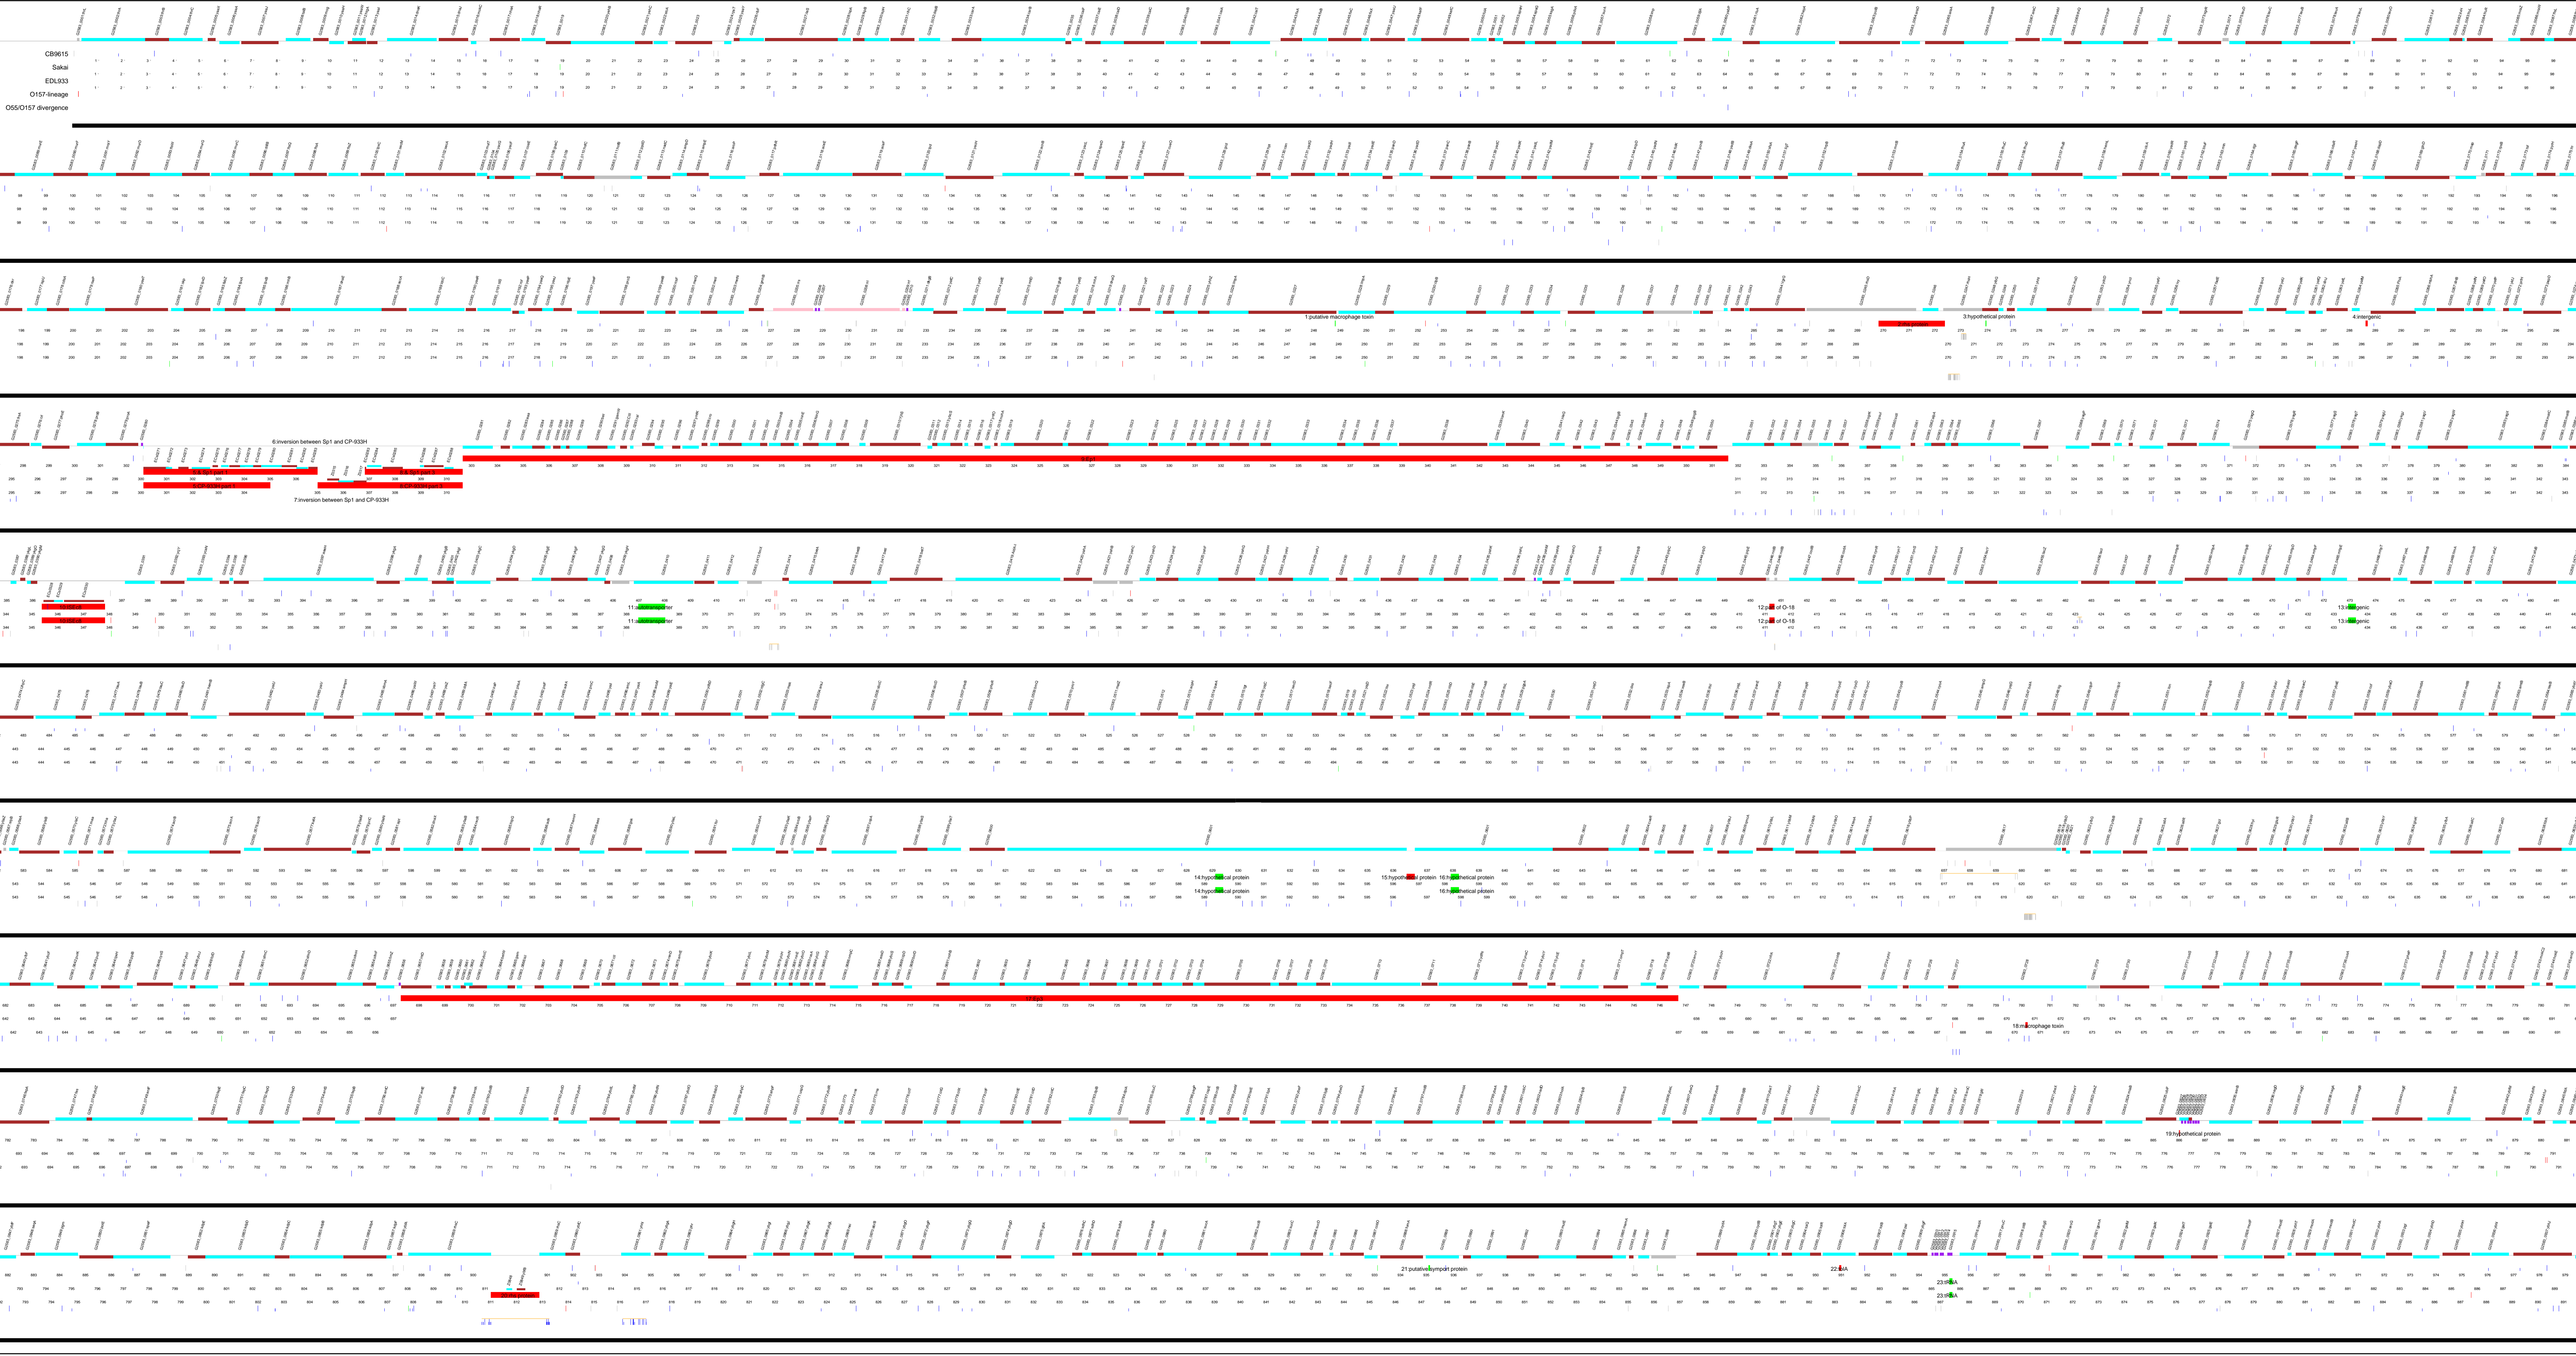

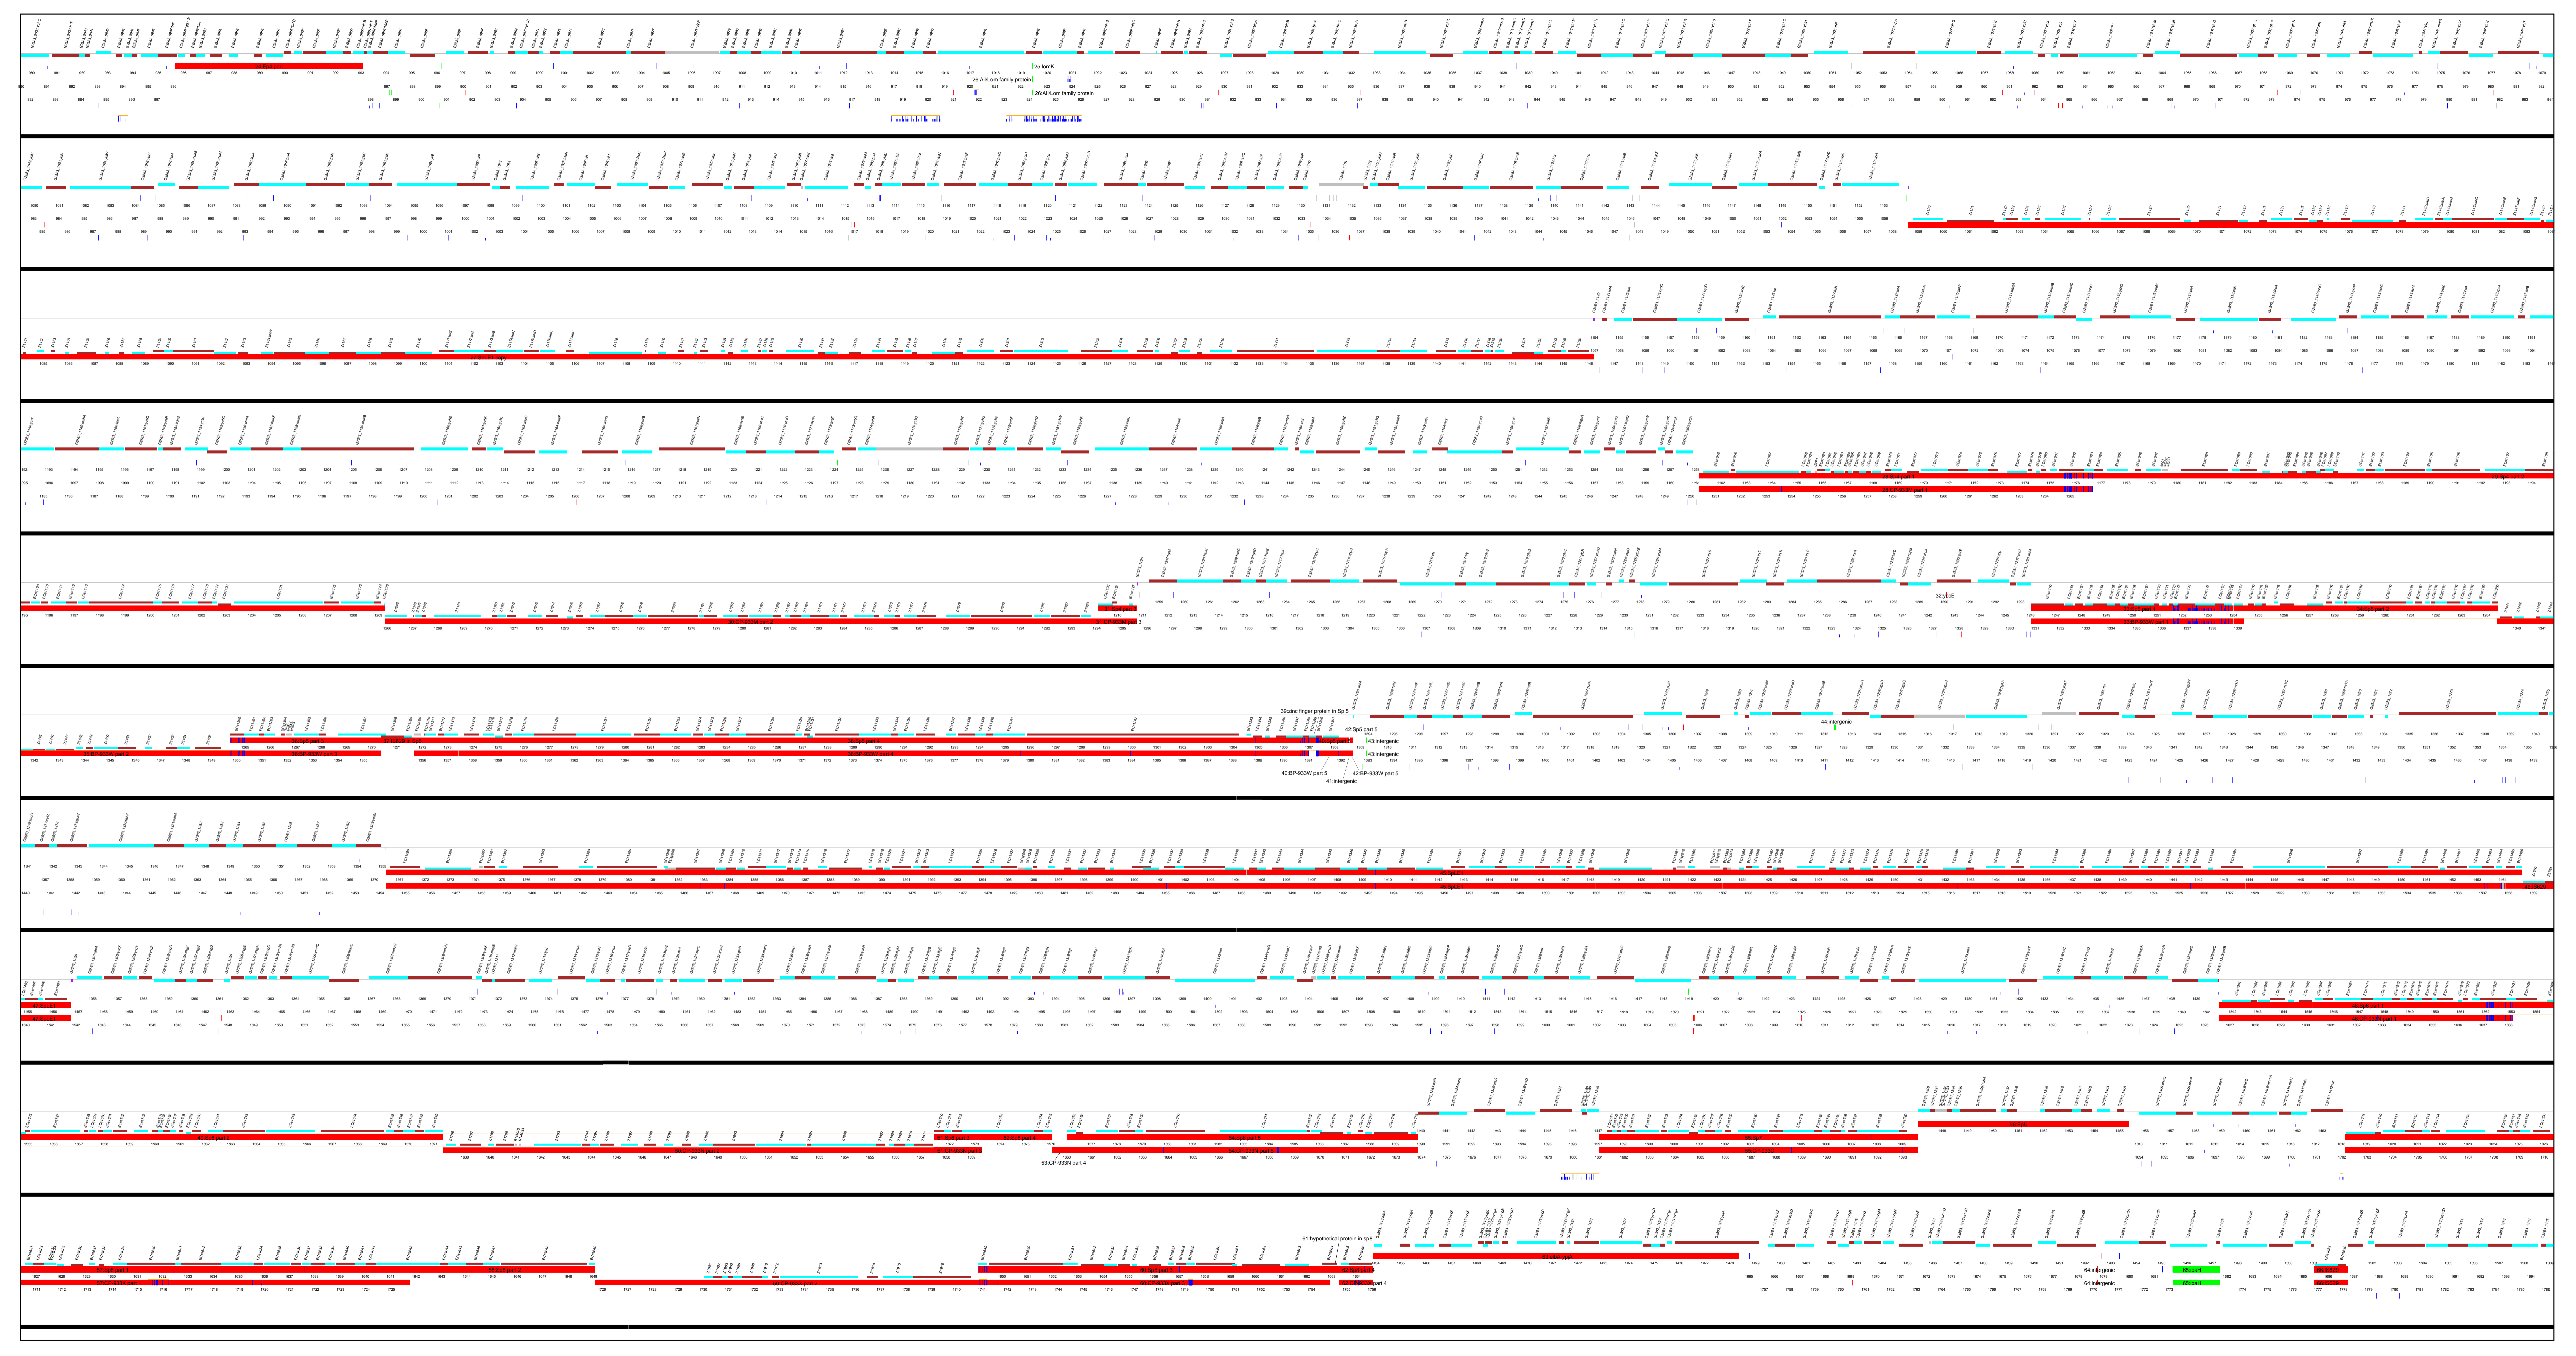

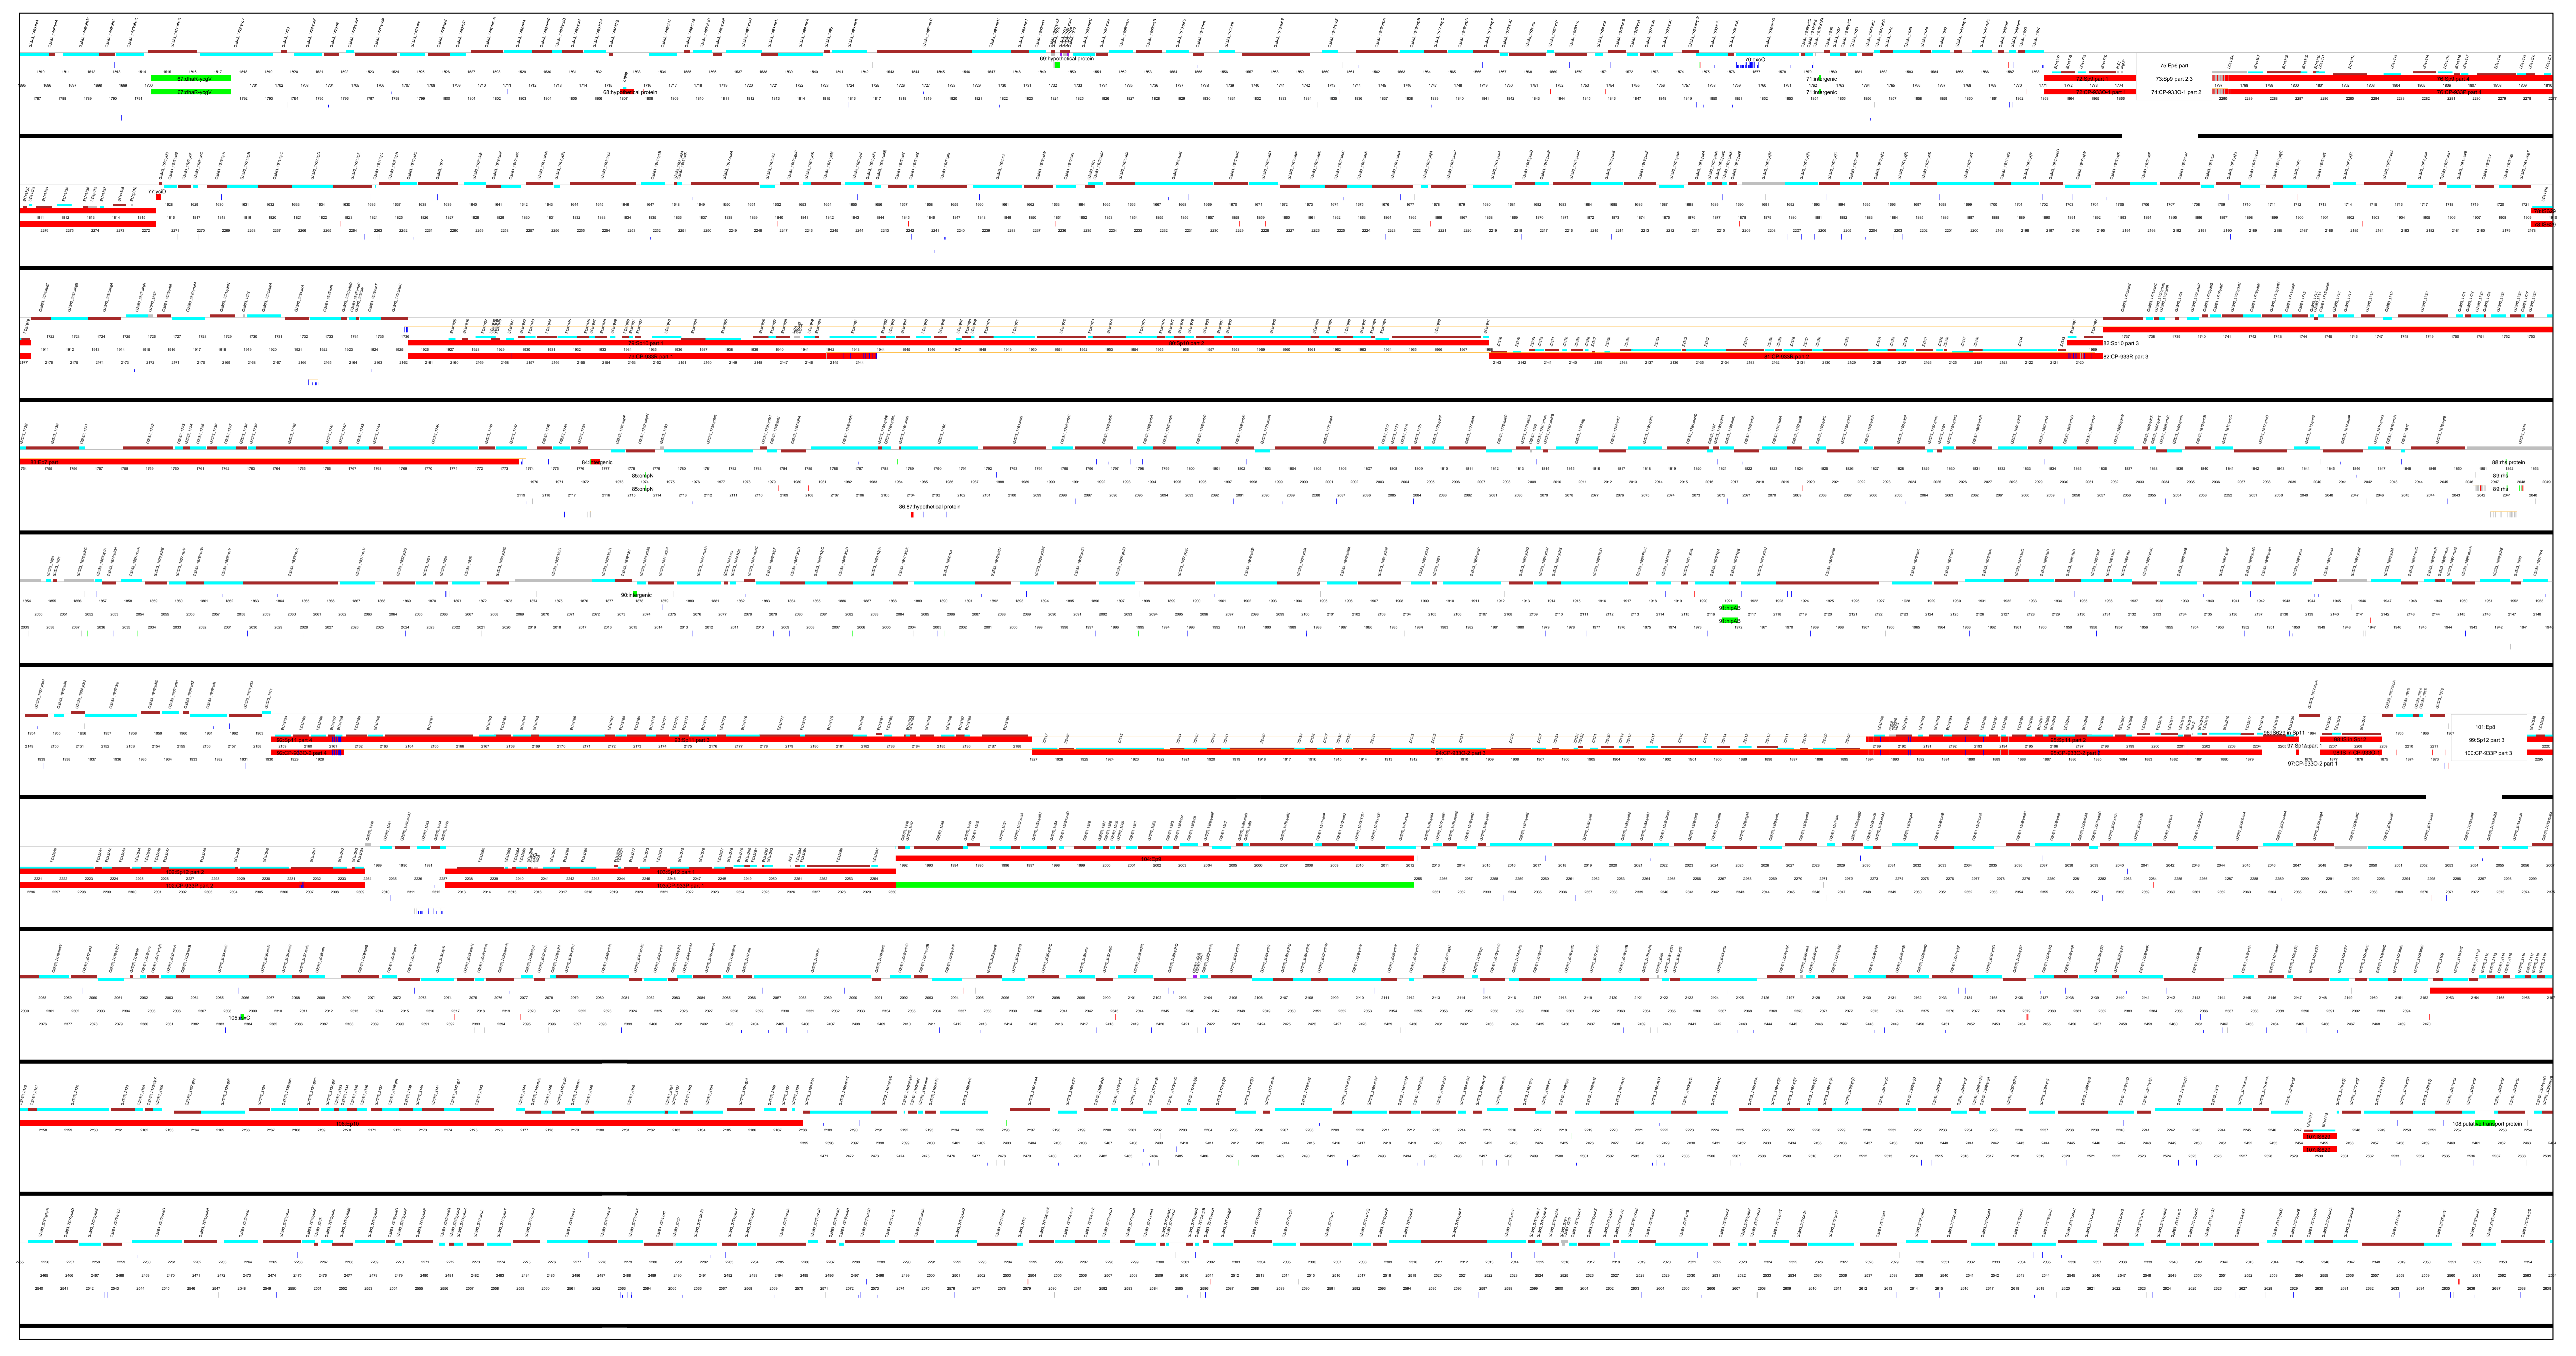

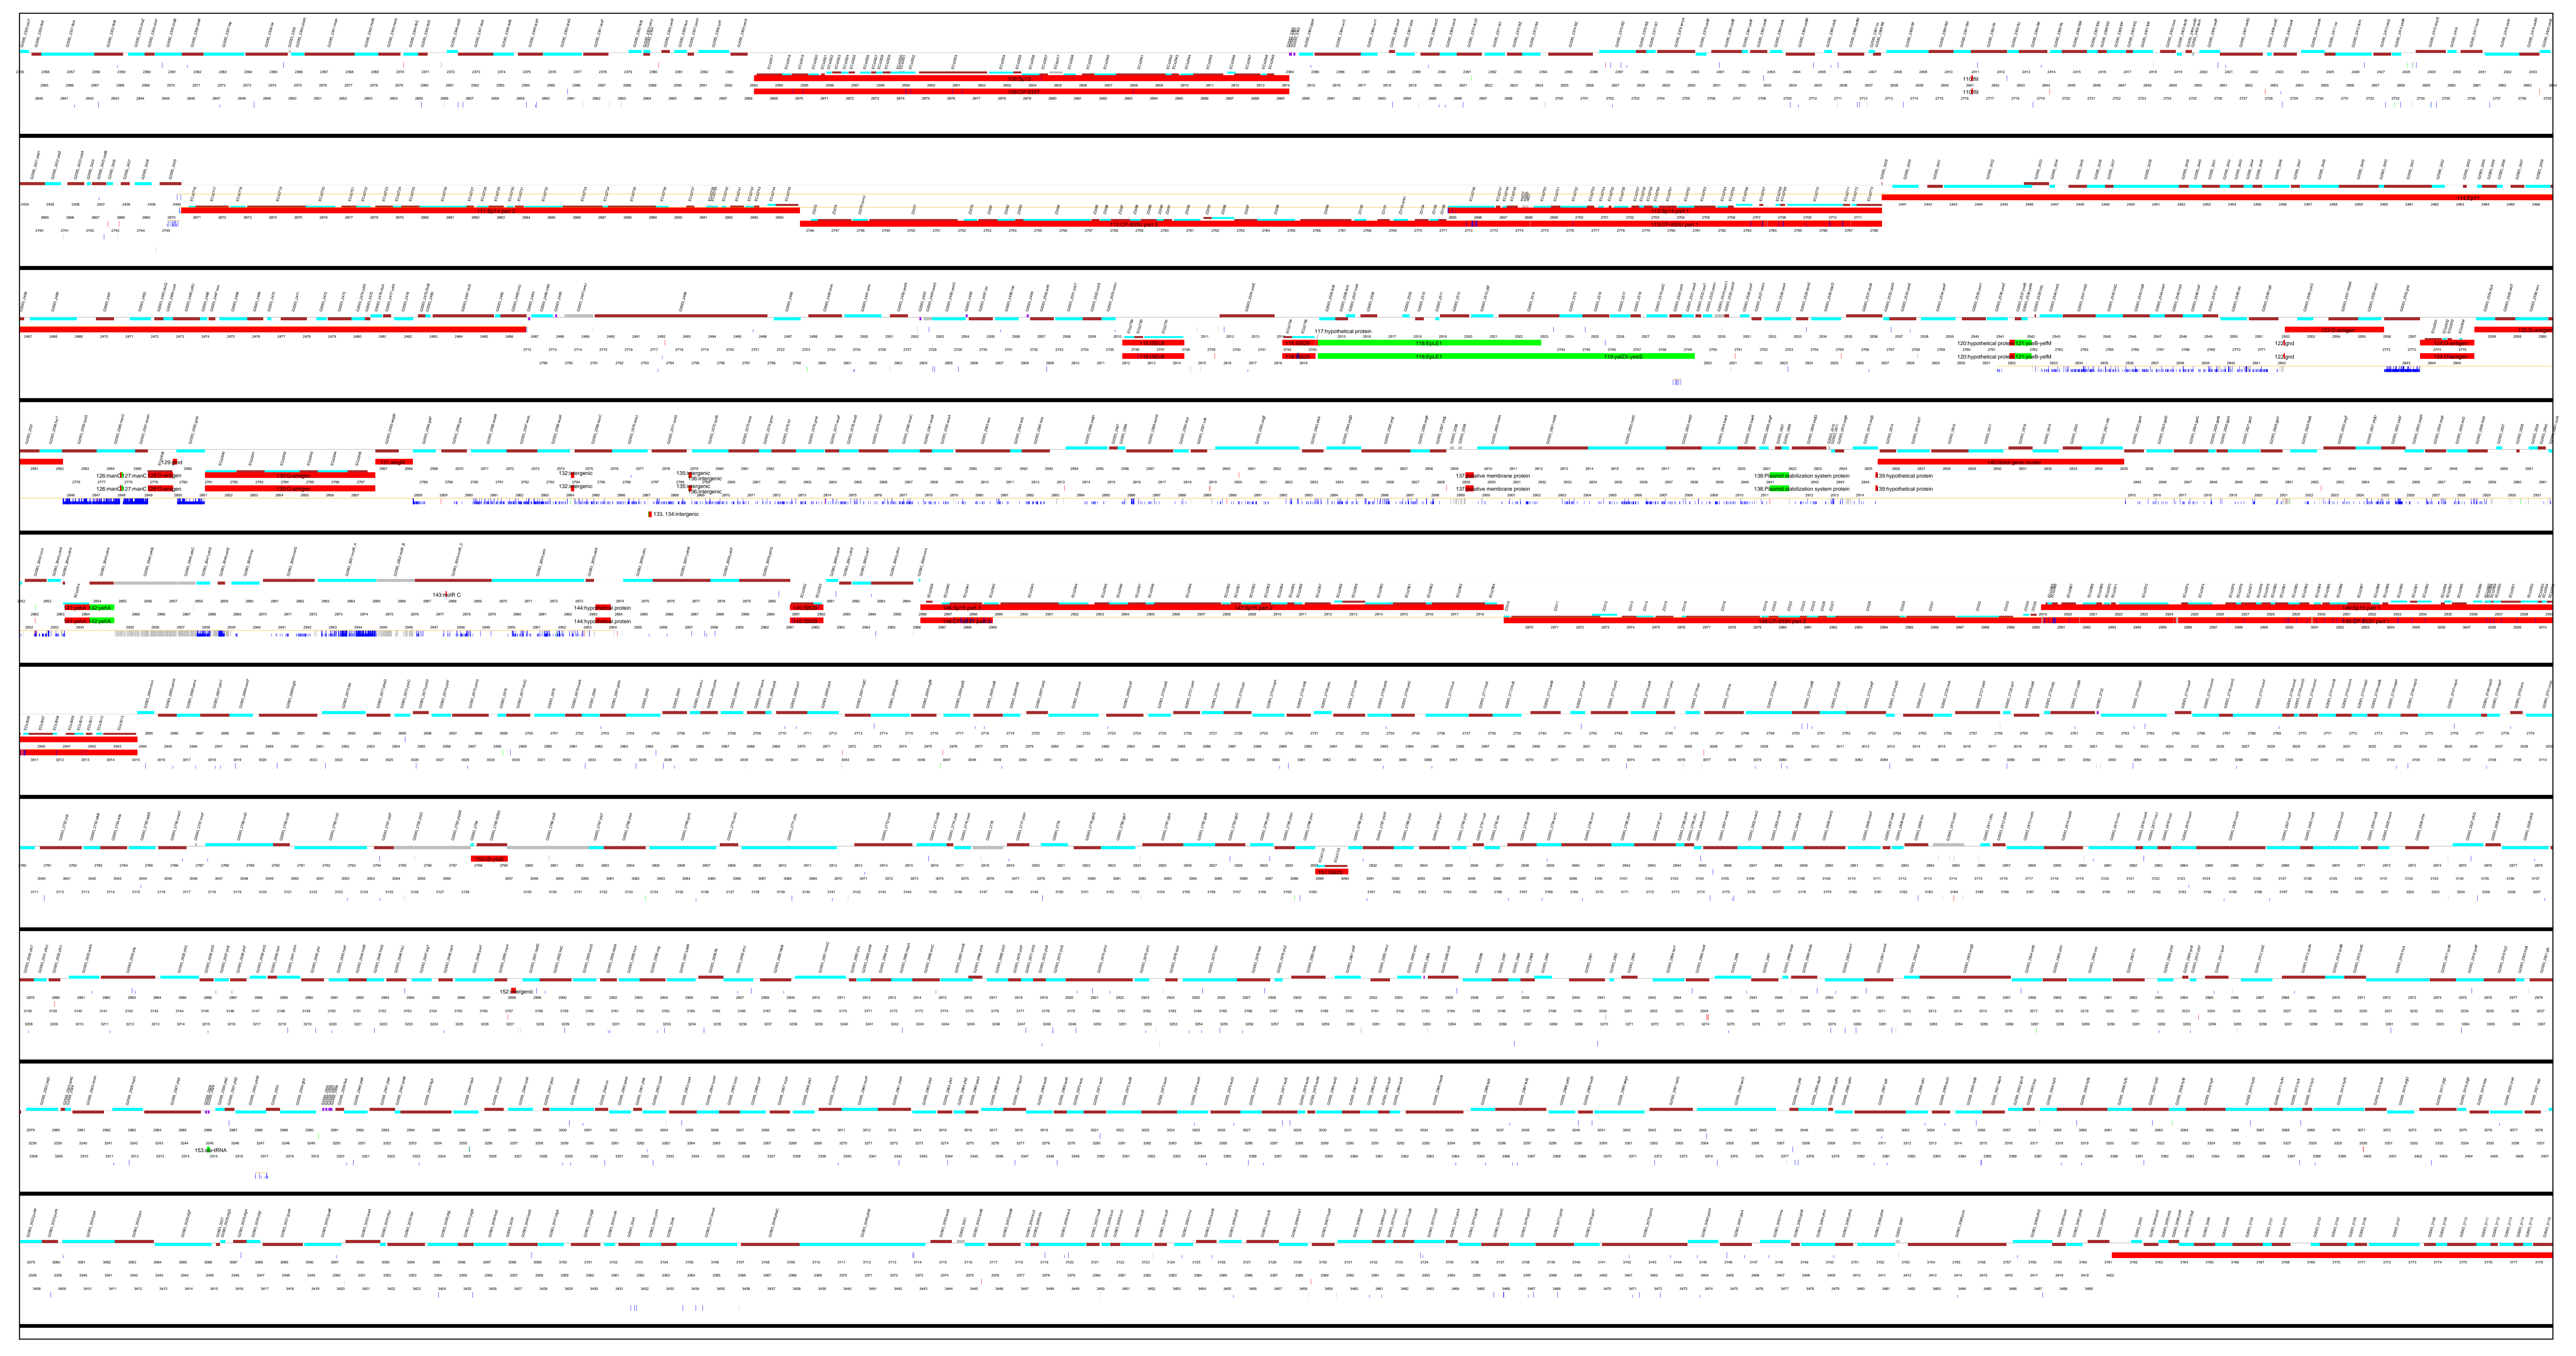

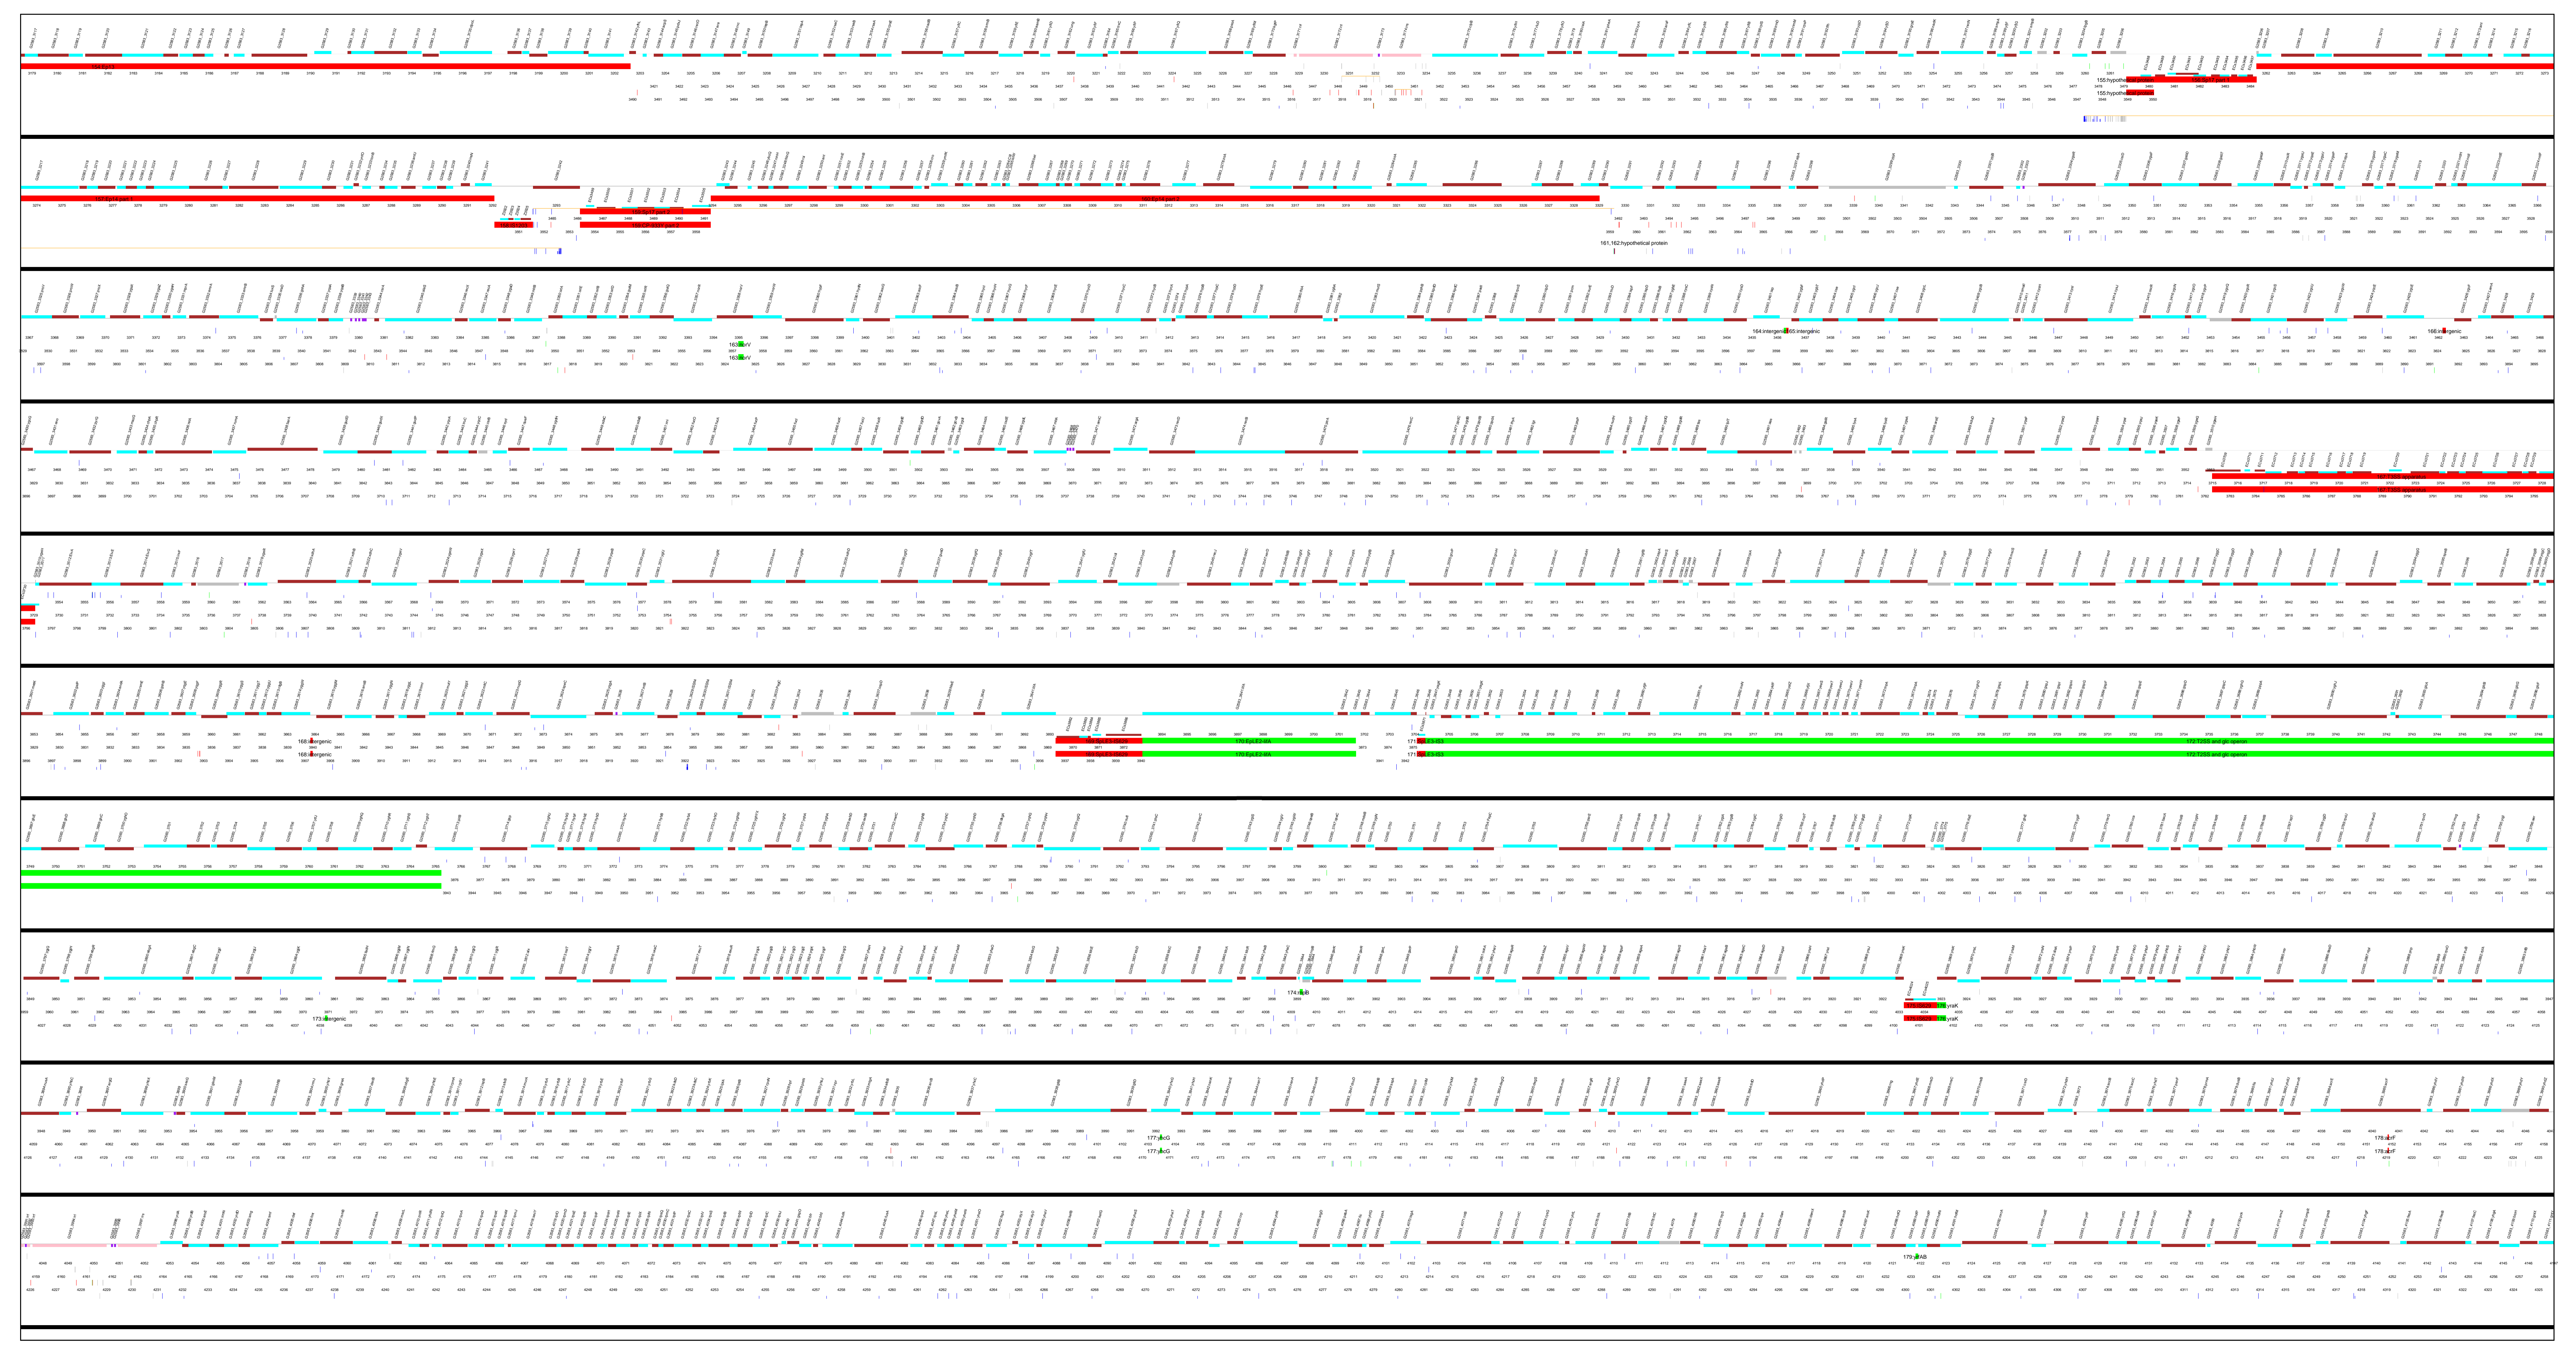

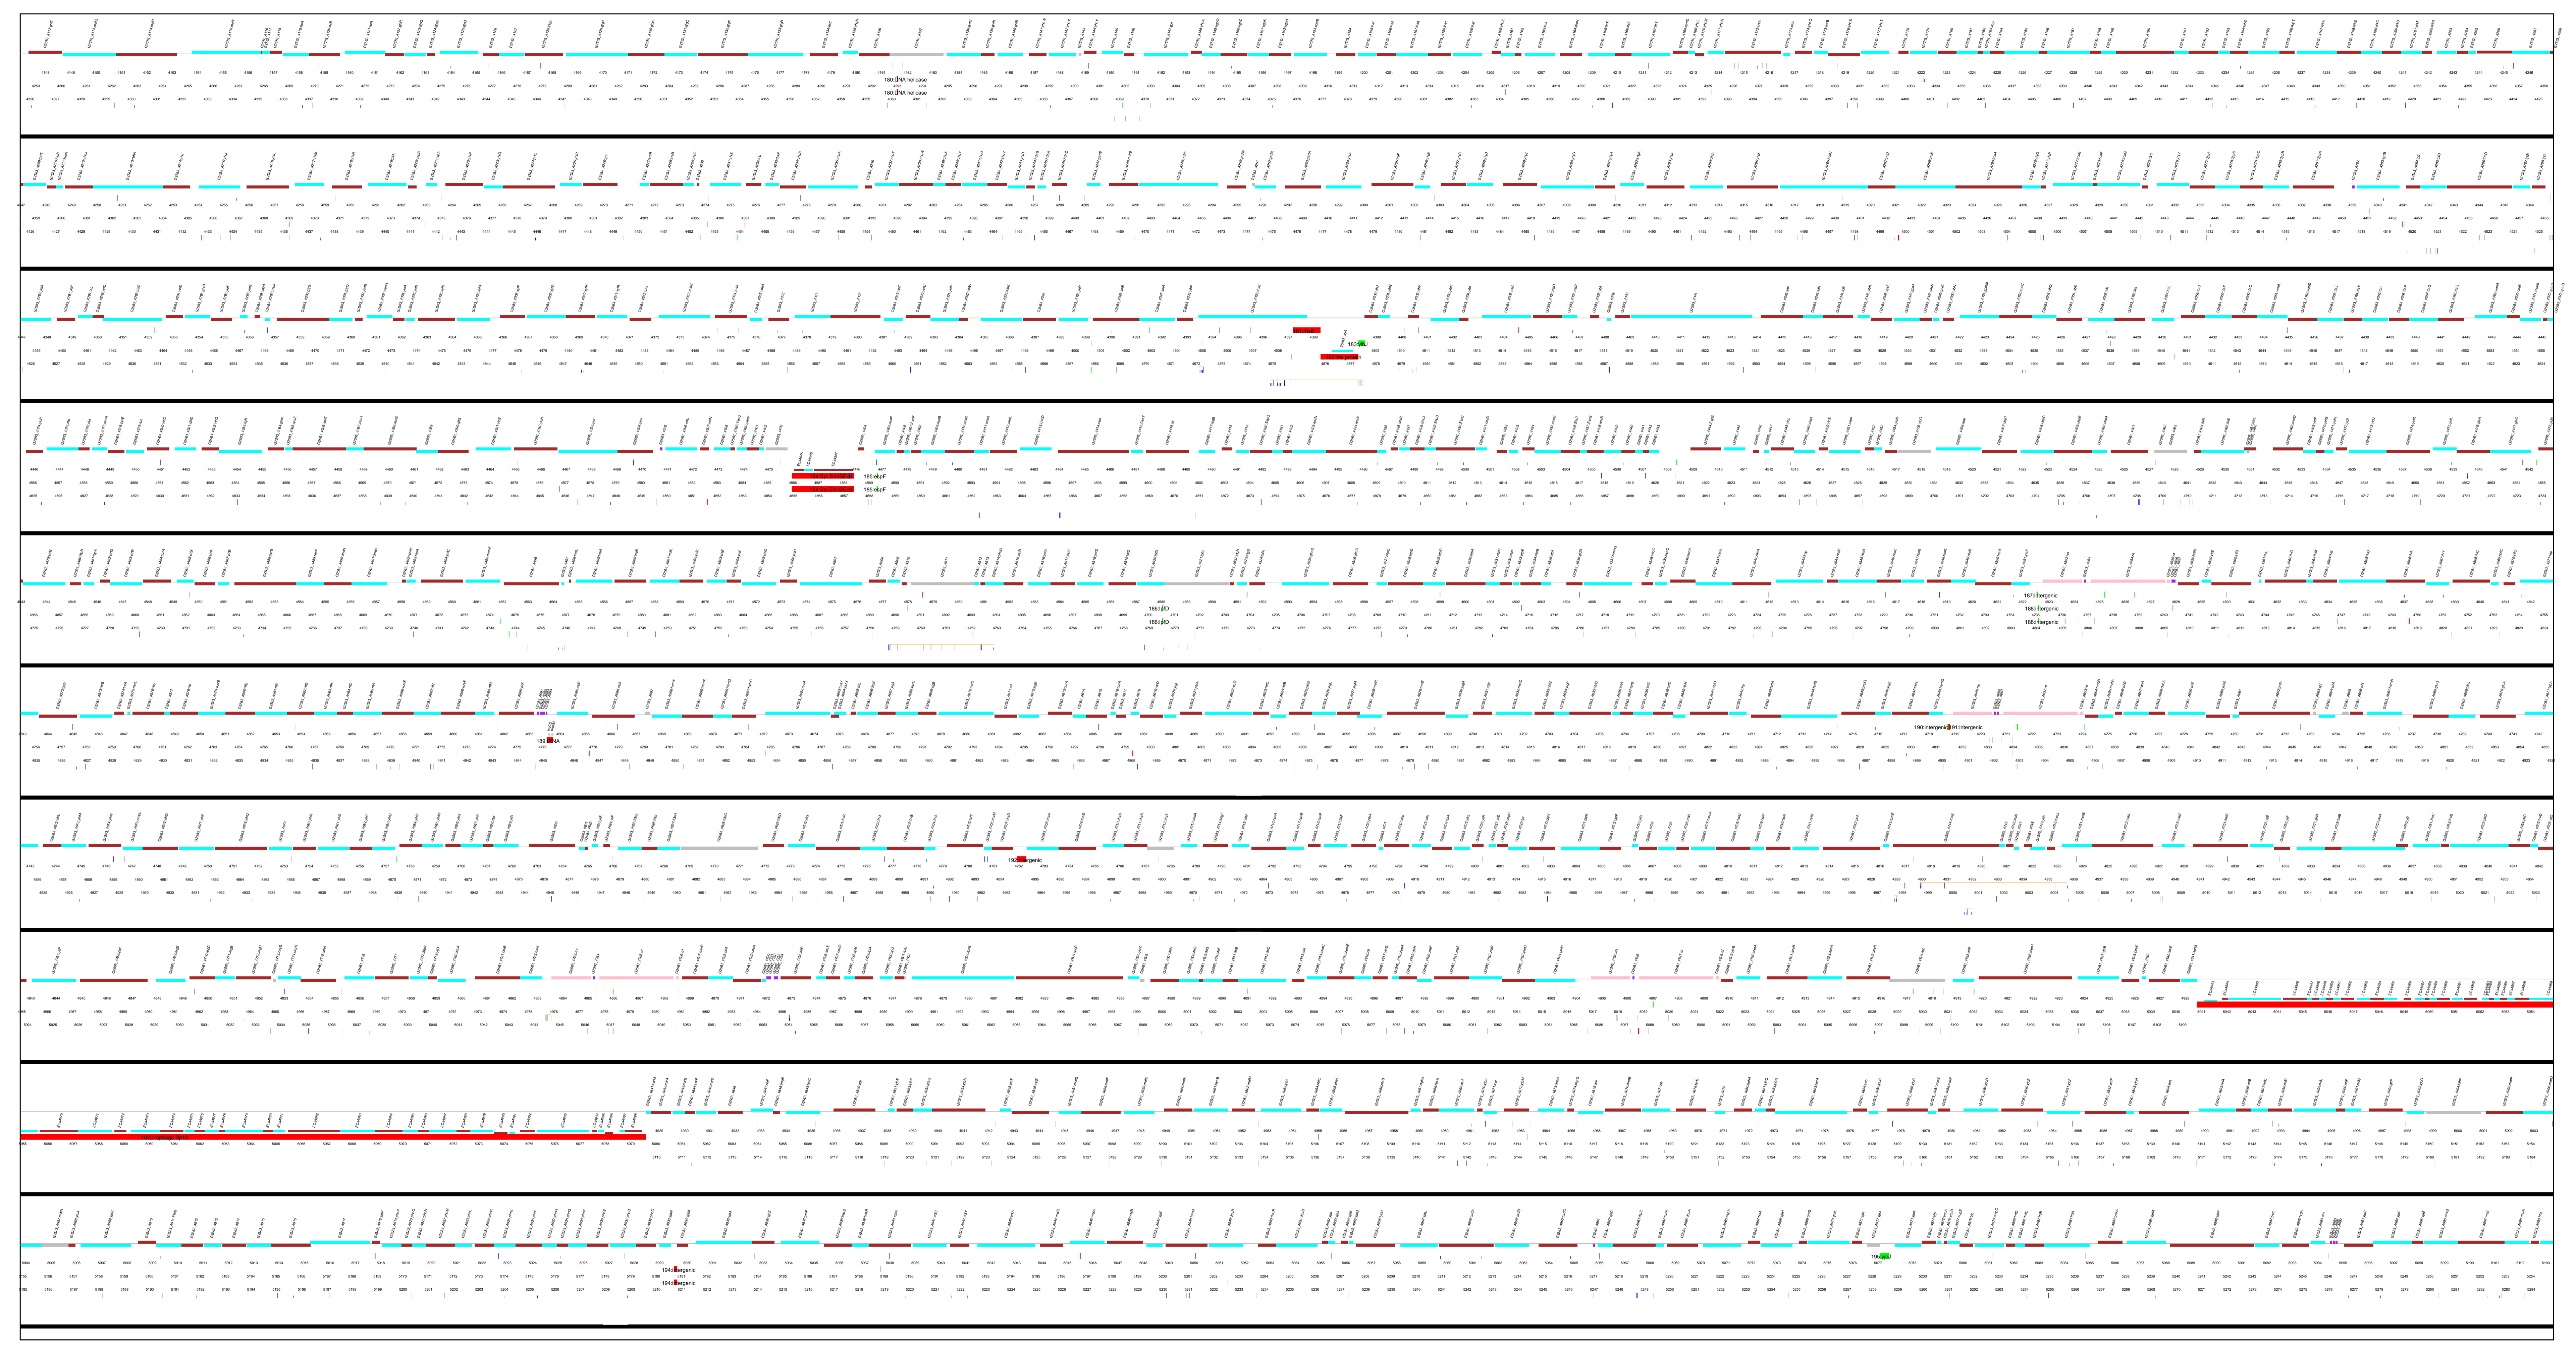

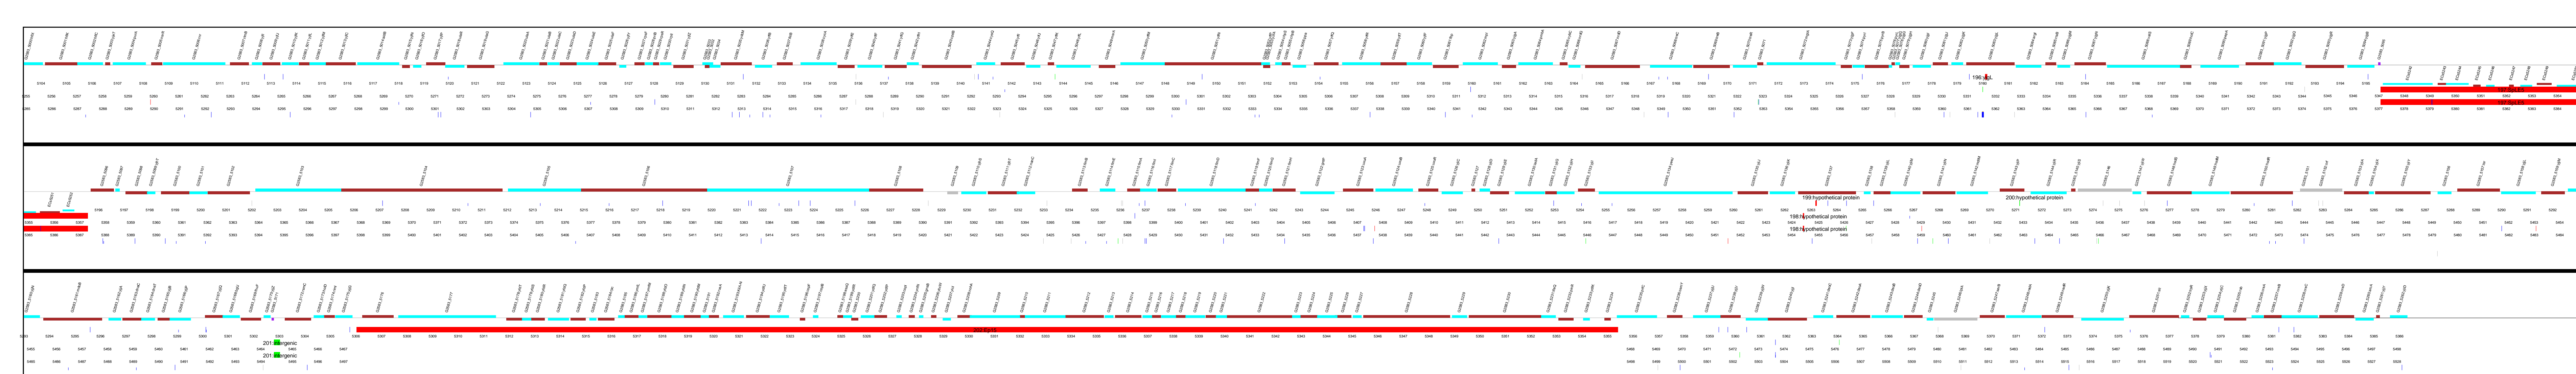

- gene
  - gene
  - rRNA
  - tRNA
  - pseudogene
- 
- deletion
  - insertion
- 
- synonymous substitution
  - nonsynonymous substitution
- 
- noncoding region substitution
  - recombination region
