# Supplementary material for: Derivation of Escherichia coli O157:H7 from Its O55:H7 Precursor
Source: PubMed Central journal article supplement (PMC2806823; doi:10.1371/journal.pone.0008700), 2010-01-14
Supplement: pone.0008700.s003.pdf [file pone.0008700.s003.pdf]

| Locus_tag  | Type       | Start | End   | +/- <sup>a</sup> | Gene <sup>b</sup> | Product                                                           |
|------------|------------|-------|-------|------------------|-------------------|-------------------------------------------------------------------|
| G2583_0001 | pseudogene | 190   | 255   | +                | thrL              | thr operon leader peptide                                         |
| G2583_0002 | CDS        | 336   | 2798  | +                | thrA              | Aspartokinase I, homoserine dehydrogenase I                       |
| G2583_0003 | CDS        | 2800  | 3732  | +                | thrB              | Homoserine kinase                                                 |
| G2583_0004 | CDS        | 3733  | 5019  | +                | thrC              | Threonine synthase                                                |
| G2583_0005 | CDS        | 5233  | 5529  | +                | yaaX              | conserved hypothetical protein                                    |
| G2583_0006 | CDS        | 5682  | 6458  | -                | yaaA              | UPF0246 protein yaaA                                              |
| G2583_0007 | CDS        | 6528  | 7958  | -                | yaaJ              | inner membrane transport protein                                  |
| G2583_0008 | CDS        | 8237  | 9190  | +                | talB              | Transaldolase 1                                                   |
| G2583_0009 | CDS        | 9305  | 9892  | +                | mog               | Molybdopterin biosynthesis mog protein                            |
| G2583_0010 | CDS        | 9927  | 10493 | -                | yaaH              | membrane protein, GPR1/FUN34/yaaH family                          |
| G2583_0012 | CDS        | 10820 | 11344 | +                | htgA              | Positive regulator for sigma 32 heat shock promoters              |
| G2583_0013 | CDS        | 11381 | 11785 | -                | yaal              | UPF0412 protein yaal precursor                                    |
| G2583_0014 | CDS        | 12162 | 14078 | +                | dnaK              | Chaperone protein dnaK                                            |
| G2583_0015 | CDS        | 14167 | 15297 | +                | dnaJ              | Chaperone protein DnaJ                                            |
| G2583_0016 | CDS        | 15401 | 15610 | -                | mokC              | Gef protein                                                       |
| G2583_0017 | CDS        | 16139 | 17305 | +                | nhaA              | Sodium/proton antiporter nhaA                                     |
| G2583_0018 | CDS        | 17365 | 18270 | +                | nhaR              | DNA-binding transcriptional activator                             |
| G2583_0019 | CDS        | 18308 | 19267 | -                | -                 | hypothetical protein                                              |
| G2583_0020 | CDS        | 19280 | 21730 | -                | yehB              | Putative usher protein                                            |
| G2583_0021 | CDS        | 21743 | 22426 | -                | yehC              | Gram-negative pilus assembly chaperone                            |
| G2583_0022 | CDS        | 22476 | 23009 | -                | stcA              | Putative type-1 fimbrial protein                                  |
| G2583_0023 | CDS        | 23311 | 24732 | -                | -                 | hypothetical protein                                              |
| G2583_0024 | CDS        | 25202 | 25465 | -                | rpsT              | 30S ribosomal protein S20                                         |
| G2583_0025 | CDS        | 25568 | 25792 | +                | yaaY              | hypothetical protein                                              |
| G2583_0026 | CDS        | 25800 | 26741 | +                | ribF              | Riboflavin biosynthesis protein ribF [Includes: Riboflavin kinase |
| G2583_0027 | CDS        | 26784 | 29600 | +                | ileS              | Isoleucyl-tRNA synthetase                                         |
| G2583_0028 | CDS        | 29600 | 30094 | +                | lspA              | Lipoprotein signal peptidase                                      |
| G2583_0029 | CDS        | 30182 | 30631 | +                | fkpB              | FKBP-type 16 kDa peptidyl-prolyl cis-trans isomerase              |
| G2583_0030 | CDS        | 30633 | 31583 | +                | ispH              | 4-hydroxy-3-methylbut-2-enyl diphosphate reductase                |
| G2583_0031 | CDS        | 31649 | 32563 | +                | rihC              | Non-specific ribonucleoside hydrolase rihC                        |
| G2583_0032 | CDS        | 32730 | 33551 | +                | dapB              | Dihydrodipicolinate reductase                                     |
| G2583_0033 | CDS        | 34007 | 35155 | +                | carA              | Carbamoylphosphate synthase small subunit                         |
| G2583_0034 | CDS        | 35173 | 38394 | +                | carB              | Carbamoyl-phosphate synthase large chain                          |
| G2583_0035 | CDS        | 38402 | 38620 | -                | -                 | hypothetical protein                                              |
| G2583_0036 | CDS        | 38655 | 39050 | +                | caiF              | DNA-binding transcriptional activator CaiF                        |
| G2583_0037 | CDS        | 39169 | 39780 | +                | caiE              | Carnitine operon protein caiE                                     |
| G2583_0038 | CDS        | 39765 | 40658 | -                | caiD              | Crotonobetainyl CoA hydratase                                     |
| G2583_0039 | CDS        | 40659 | 42227 | -                | caiC              | Putative crotonobetaine/carnitine-CoA ligase                      |
| G2583_0040 | CDS        | 42286 | 43503 | -                | caiB              | Crotonobetainyl-CoA:carnitine CoA-transferase                     |
| G2583_0041 | CDS        | 43632 | 44774 | -                | caiA              | Crotonobetainyl-CoA dehydrogenase                                 |
| G2583_0042 | CDS        | 44805 | 46319 | -                | caiT              | L-carnitine/gamma-butyrobetaine antiporter                        |
| G2583_0043 | CDS        | 46730 | 47563 | +                | fixA              | conserved hypothetical protein                                    |
| G2583_0044 | CDS        | 47578 | 48519 | +                | fixB              | hypothetical protein                                              |
| G2583_0045 | CDS        | 48570 | 49856 | +                | fixC              | PAPS (adenosine 3'-phosphate 5'-phosphosulfate) 3'(2'),5'-        |
| G2583_0046 | CDS        | 49853 | 50140 | +                | fixX              | Ferredoxin-like protein fixX                                      |
| G2583_0047 | CDS        | 50198 | 51529 | +                | yaaU              | Major facilitator family transporter                              |
| G2583_0048 | CDS        | 51637 | 52167 | +                | kefF              | Glutathione-regulated potassium-efflux system ancillary protein   |
| G2583_0049 | CDS        | 52160 | 54022 | +                | kefC              | Glutathione-regulated potassium-efflux system protein kefC        |
| G2583_0050 | CDS        | 54103 | 54693 | +                | folA              | Dihydrofolate reductase                                           |
| G2583_0051 | CDS        | 54779 | 55012 | +                | -                 | putative antitoxin of gyrase inhibiting toxin-antitoxin system    |
| G2583_0052 | CDS        | 55015 | 55329 | +                | ccdB              | CcdB protein                                                      |
| G2583_0053 | CDS        | 55326 | 56174 | -                | apaH              | Bis(5'-nucleosyl)-tetrphosphatase, symmetrical                    |
| G2583_0054 | CDS        | 56181 | 56558 | -                | apaG              | ApaG                                                              |
| G2583_0055 | CDS        | 56561 | 57382 | -                | ksgA              | Dimethyladenosine transferase (S-adenosylmethionine-6-N', N'-     |
| G2583_0056 | CDS        | 57379 | 58368 | -                | pdxA              | 4-hydroxythreonine-4-phosphate dehydrogenase (4-                  |
| G2583_0057 | CDS        | 58368 | 59654 | -                | surA              | Chaperone surA precursor                                          |
| G2583_0058 | CDS        | 59707 | 62055 | -                | imp               | LPS-assembly protein precursor                                    |
| G2583_0059 | CDS        | 62310 | 63125 | +                | djlA              | putative oxidoreductase Fe-S binding subunit                      |
| G2583_0060 | CDS        | 63420 | 64157 | +                | yabP              | hypothetical protein                                              |
| G2583_0061 | CDS        | 64575 | 65234 | -                | rluA              | Ribosomal large subunit pseudouridine synthase A                  |

| Locus_tag  | Type       | Start  | End    | +/- <sup>a</sup> | Gene <sup>b</sup> | Product                                                    |
|------------|------------|--------|--------|------------------|-------------------|------------------------------------------------------------|
| G2583_0062 | CDS        | 65246  | 68152  | -                | hepA              | RNA polymerase-associated protein rapA                     |
| G2583_0063 | CDS        | 68316  | 70667  | -                | polB              | DNA polymerase II                                          |
| G2583_0064 | CDS        | 70742  | 71437  | -                | araD              | L-ribulose-5-phosphate 4-epimerase                         |
| G2583_0065 | CDS        | 71637  | 73139  | -                | araA              | L-arabinose isomerase                                      |
| G2583_0066 | CDS        | 73150  | 74850  | -                | araB              | Ribulokinase                                               |
| G2583_0067 | CDS        | 75138  | 76067  | +                | araC              | arabinose operon regulatory protein                        |
| G2583_0068 | CDS        | 76153  | 76917  | +                | yabl              | hypothetical protein                                       |
| G2583_0069 | CDS        | 77004  | 77702  | -                | thiQ              | Thiamine import ATP-binding protein thiQ                   |
| G2583_0070 | CDS        | 77686  | 79296  | -                | thiP              | Thiamine/thiamine pyrophosphate ABC transporter, permease  |
| G2583_0071 | CDS        | 79272  | 80267  | -                | tbpA              | Thiamin/thiamin pyrophosphate ABC transporter, periplasmic |
| G2583_0072 | CDS        | 80627  | 81196  | +                | -                 | hypothetical protein                                       |
| G2583_0073 | CDS        | 81425  | 83083  | -                | sgrR              | putative transport protein                                 |
| G2583_0074 | ncRNA      | 83151  | 83376  | +                | -                 | ncRNA                                                      |
| G2583_0075 | CDS        | 83411  | 84016  | -                | leuD              | 3-isopropylmalate dehydratase small subunit                |
| G2583_0076 | CDS        | 84027  | 85427  | -                | leuC              | 3-isopropylmalate dehydratase large subunit                |
| G2583_0077 | CDS        | 85430  | 86521  | -                | leuB              | 3-isopropylmalate dehydrogenase                            |
| G2583_0078 | CDS        | 86521  | 88092  | -                | leuA              | 2-isopropylmalate synthase                                 |
| G2583_0079 | CDS        | 88185  | 88271  | -                | leuL              | leader; Amino acid biosynthesis: Leucine                   |
| G2583_0080 | CDS        | 88911  | 89873  | +                | leuO              | leucine transcriptional activator                          |
| G2583_0081 | CDS        | 90191  | 91915  | +                | ilvI              | Acetolactate synthase                                      |
| G2583_0082 | CDS        | 91888  | 92409  | +                | ilvH              | Acetolactate synthase III, valine sensitive, small subunit |
| G2583_0083 | CDS        | 92421  | 92507  | +                | fruL              | fruR leader peptide                                        |
| G2583_0084 | CDS        | 92589  | 93593  | +                | fruR              | Fructose repressor                                         |
| G2583_0085 | CDS        | 94195  | 94653  | +                | mraZ              | hypothetical protein                                       |
| G2583_0086 | CDS        | 94655  | 95596  | +                | mraW              | S-adenosyl-L-methionine-dependent methyltransferase mraW   |
| G2583_0087 | CDS        | 95593  | 95958  | +                | ftsL              | Cell division protein ftsL                                 |
| G2583_0088 | CDS        | 95974  | 97740  | +                | ftsI              | Peptidoglycan synthetase ftsI precursor                    |
| G2583_0089 | CDS        | 97727  | 99214  | +                | murE              | UDP-N-acetylmuramoyl-L-alanyl-D-glutamate--2, 6-           |
| G2583_0090 | CDS        | 99211  | 100569 | +                | murF              | UDP-N-acetylmuramoyl-tripeptide--D-alanyl-D-alanine ligase |
| G2583_0091 | CDS        | 100563 | 101645 | +                | mraY              | Phospho-N-acetylmuramoyl-pentapeptide-transferase          |
| G2583_0092 | CDS        | 101648 | 102964 | +                | murD              | UDP-N-acetylmuramoylalanine--D-glutamate ligase            |
| G2583_0093 | CDS        | 102964 | 104208 | +                | ftsW              | Cell division protein ftsW                                 |
| G2583_0094 | CDS        | 104205 | 105272 | +                | murG              | UDP-N-acetylglucosamine--N-acetylmuramyl-(pentapeptide)    |
| G2583_0095 | CDS        | 105326 | 106801 | +                | murC              | UDP-N-acetylmuramate--L-alanine ligase                     |
| G2583_0096 | CDS        | 106794 | 107714 | +                | ddlB              | D-alanine--D-alanine ligase B                              |
| G2583_0097 | CDS        | 107716 | 108546 | +                | ftsQ              | Cell division protein FtsQ                                 |
| G2583_0098 | CDS        | 108543 | 109805 | +                | ftsA              | Cell division protein ftsA                                 |
| G2583_0099 | CDS        | 109866 | 111017 | +                | ftsZ              | Cell division protein ftsZ                                 |
| G2583_0100 | CDS        | 111118 | 112035 | +                | lpxC              | UDP-3-O-[3-hydroxymyristoyl] N-acetylglucosamine           |
| G2583_0101 | CDS        | 112094 | 112777 | +                | secM              | Secretion monitor protein                                  |
| G2583_0102 | CDS        | 112839 | 115544 | +                | secA              | preprotein translocase subunit SecA                        |
| G2583_0103 | CDS        | 115604 | 116002 | +                | mutT              | 7,8-dihydro-8-oxoguanine-triphosphatase                    |
| G2583_0104 | CDS        | 116008 | 116142 | -                | -                 | hypothetical protein                                       |
| G2583_0105 | CDS        | 116093 | 116290 | -                | yacG              | Uncharacterized protein conserved in bacteria              |
| G2583_0106 | CDS        | 116300 | 117043 | -                | yacF              | UPF0289 protein yacF                                       |
| G2583_0107 | CDS        | 117043 | 117663 | -                | coaE              | Dephospho-CoA kinase                                       |
| G2583_0108 | CDS        | 117888 | 118931 | +                | guaC              | GMP reductase                                              |
| G2583_0109 | CDS        | 118851 | 118958 | -                | -                 | hypothetical protein                                       |
| G2583_0110 | CDS        | 118966 | 120168 | -                | hofC              | Type IV pilus assembly protein PilC                        |
| G2583_0111 | pseudogene | 120158 | 121543 | -                | hofB              | GspE family protein HofB                                   |
| G2583_0112 | CDS        | 121553 | 121993 | -                | ppdD              | Prelipin peptidase dependent protein                       |
| G2583_0113 | CDS        | 122196 | 123089 | -                | nadC              | Nicotinate-nucleotide pyrophosphorylase                    |
| G2583_0114 | CDS        | 123177 | 123728 | +                | ampD              | N-acetylmuramoyl-L-alanine amidase                         |
| G2583_0115 | CDS        | 123725 | 124579 | +                | ampE              | regulatory protein AmpE                                    |
| G2583_0116 | CDS        | 124622 | 125995 | -                | aroP              | Aromatic amino acid transport protein                      |
| G2583_0117 | CDS        | 126536 | 127300 | +                | pdhR              | transcriptional regulator, GntR family                     |
| G2583_0118 | CDS        | 127461 | 130124 | +                | aceE              | Pyruvate dehydrogenase E1 component                        |
| G2583_0119 | CDS        | 130139 | 132031 | +                | aceF              | Dihydrolipoylysine-residue acetyltransferase               |
| G2583_0120 | CDS        | 132176 | 133663 | +                | lpd               | Pyruvate/2-oxoglutarate dehydrogenase complex,             |
| G2583_0121 | CDS        | 133735 | 135588 | -                | yacH              | hypothetical protein                                       |

| Locus_tag  | Type  | Start  | End    | +/- <sup>a</sup> | Gene <sup>b</sup> | Product                                                    |
|------------|-------|--------|--------|------------------|-------------------|------------------------------------------------------------|
| G2583_0122 | CDS   | 135943 | 138540 | +                | acnB              | Aconitate hydratase 2                                      |
| G2583_0123 | CDS   | 138716 | 139078 | +                | yacl              | hypothetical protein                                       |
| G2583_0124 | CDS   | 139116 | 139910 | -                | speD              | S-adenosylmethionine decarboxylase proenzyme (AdoMetDC)    |
| G2583_0125 | CDS   | 139926 | 140792 | -                | speE              | Spermidine synthase                                        |
| G2583_0126 | CDS   | 140898 | 141416 | -                | yacC              | hypothetical protein                                       |
| G2583_0127 | CDS   | 141411 | 142961 | +                | cueO              | Copper oxidase CueO                                        |
| G2583_0128 | CDS   | 143163 | 145553 | -                | gcd               | Quinoprotein glucose dehydrogenase                         |
| G2583_0129 | CDS   | 145759 | 146295 | +                | hpt               | Hypoxanthine phosphoribosyltransferase                     |
| G2583_0130 | CDS   | 146336 | 146998 | -                | can               | Carbonic anhydrase                                         |
| G2583_0131 | CDS   | 147107 | 148033 | +                | yadG              | ABC transporter, ATP-binding protein                       |
| G2583_0132 | CDS   | 148030 | 148800 | +                | yadH              | hypothetical protein                                       |
| G2583_0133 | CDS   | 148905 | 149345 | +                | yadI              | PTS system IIA component domain protein                    |
| G2583_0134 | CDS   | 149409 | 150638 | +                | yadE              | Polysaccharide deacetylase domain protein                  |
| G2583_0135 | CDS   | 150642 | 151022 | -                | panD              | Aspartate 1-decarboxylase precursor (Aspartate alpha-      |
| G2583_0136 | CDS   | 151296 | 152192 | +                | yadD              | hypothetical protein                                       |
| G2583_0137 | CDS   | 152484 | 153335 | -                | panC              | Pantothenate synthetase                                    |
| G2583_0138 | CDS   | 153347 | 154141 | -                | panB              | 3-methyl-2-oxobutanoate hydroxymethyltransferase           |
| G2583_0139 | CDS   | 154276 | 155385 | -                | yadC              | Putative fimbrial protein                                  |
| G2583_0140 | CDS   | 155397 | 155987 | -                | yadK              | Putative fimbrial protein                                  |
| G2583_0141 | CDS   | 156008 | 156613 | -                | yadL              | Putative fimbrial protein                                  |
| G2583_0142 | CDS   | 156628 | 157188 | -                | yadM              | Putative fimbrial protein                                  |
| G2583_0143 | CDS   | 157190 | 159790 | -                | htrE              | Probable outer membrane porin protein involved in fimbrial |
| G2583_0144 | CDS   | 159832 | 160563 | -                | ecpD              | Gram-negative pili assembly chaperone                      |
| G2583_0145 | CDS   | 160644 | 161249 | -                | yadN              | Putative fimbrial protein                                  |
| G2583_0146 | CDS   | 161520 | 162002 | -                | folK              | 2-amino-4-hydroxy-6-hydroxymethylidihydropteridine         |
| G2583_0147 | CDS   | 161999 | 163417 | -                | pcnB              | Poly(A) polymerase                                         |
| G2583_0148 | CDS   | 163456 | 164382 | -                | yadB              | Glutamyl-Q tRNA(Asp) synthetase                            |
| G2583_0149 | CDS   | 164419 | 164874 | -                | dksA              | RNA polymerase-binding protein DksA                        |
| G2583_0150 | CDS   | 165052 | 165756 | -                | sfsA              | Sugar fermentation stimulation protein A                   |
| G2583_0151 | CDS   | 165771 | 166310 | -                | ligT              | hypothetical protein                                       |
| G2583_0152 | CDS   | 166330 | 168804 | +                | hrpB              | ATP-dependent helicase HrpB                                |
| G2583_0153 | CDS   | 169000 | 171534 | +                | mrcB              | Penicillin-binding protein 1B                              |
| G2583_0154 | CDS   | 171754 | 173997 | +                | fhuA              | Ferrichrome-iron receptor                                  |
| G2583_0155 | CDS   | 174048 | 174845 | +                | fhuC              | Ferrichrome transport ATP-binding protein FhuC             |
| G2583_0156 | CDS   | 174845 | 175735 | +                | fhuD              | Ferrichrome-binding periplasmic protein FhuD               |
| G2583_0157 | CDS   | 175732 | 177714 | +                | fhuB              | Ferrichrome ABC transporter, permease protein FhuB         |
| G2583_0158 | CDS   | 177749 | 179029 | -                | hemL              | Glutamate-1-semialdehyde 2,1-aminomutase                   |
| G2583_0159 | CDS   | 179254 | 180675 | +                | clcA              | H(+)/Cl(-) exchange transporter clcA                       |
| G2583_0160 | CDS   | 180757 | 181101 | +                | yadR              | Iron-sulfur cluster insertion protein erpA                 |
| G2583_0161 | CDS   | 181148 | 181771 | -                | yadS              | UPF0126 inner membrane protein yadS                        |
| G2583_0162 | CDS   | 181809 | 182609 | -                | btuF              | Vitamin B12-binding protein precursor                      |
| G2583_0163 | CDS   | 182602 | 183300 | -                | mtn               | MTA/SAH nucleosidase                                       |
| G2583_0164 | CDS   | 183384 | 184901 | +                | dgt               | Deoxyguanosinetriphosphate triphosphohydrolase             |
| G2583_0165 | CDS   | 185031 | 186455 | +                | degP              | Protease do precursor                                      |
| G2583_0166 | CDS   | 186610 | 187767 | +                | cdaR              | hypothetical protein                                       |
| G2583_0167 | CDS   | 187856 | 188242 | -                | yaeH              | UPF0325 protein yaeH                                       |
| G2583_0168 | CDS   | 188557 | 189381 | -                | dapD              | 2,3,4,5-tetrahydropyridine-2,6-dicarboxylate N-            |
| G2583_0169 | CDS   | 189412 | 191907 | -                | glnD              | [Protein-PilI] uridylyltransferase                         |
| G2583_0170 | CDS   | 192146 | 192940 | -                | map               | Methionine aminopeptidase                                  |
| G2583_0171 | ncRNA | 193146 | 193281 | +                | -                 | ncRNA                                                      |
| G2583_0172 | CDS   | 193308 | 194033 | +                | rpsB              | 30S ribosomal protein S2                                   |
| G2583_0173 | CDS   | 194291 | 195142 | +                | tsf               | Elongation factor Ts                                       |
| G2583_0174 | CDS   | 195289 | 196014 | +                | pyrH              | UMP kinase                                                 |
| G2583_0175 | CDS   | 196164 | 196721 | +                | frr               | Ribosome recycling factor                                  |
| G2583_0176 | CDS   | 196813 | 198009 | +                | dxr               | Putative ATP-binding component of a transport system       |
| G2583_0177 | CDS   | 198195 | 198956 | +                | ispU              | Undecaprenyl pyrophosphate synthetase                      |
| G2583_0178 | CDS   | 198969 | 199826 | +                | cdsA              | Phosphatidate cytidylyltransferase                         |
| G2583_0179 | CDS   | 199838 | 201190 | +                | rseP              | Regulator of sigma E protease                              |
| G2583_0180 | CDS   | 201220 | 203652 | +                | yaeT              | Outer membrane protein assembly factor yaeT precursor      |
| G2583_0181 | CDS   | 203774 | 204259 | +                | skp               | Chaperone protein skp precursor                            |

| Locus_tag  | Type       | Start  | End    | +/- <sup>a</sup> | Gene <sup>b</sup> | Product                                                    |
|------------|------------|--------|--------|------------------|-------------------|------------------------------------------------------------|
| G2583_0182 | CDS        | 204263 | 205288 | +                | lpxD              | UDP-3-O-[3-hydroxymyristoyl] glucosamine N-acyltransferase |
| G2583_0183 | CDS        | 205393 | 205848 | +                | fabZ              | (3R)-hydroxymyristoyl-(acyl carrier protein) dehydratase   |
| G2583_0184 | CDS        | 205852 | 206640 | +                | lpxA              | Acyl-[acyl-carrier-protein]-UDP-N-acetylglucosamine O-     |
| G2583_0185 | CDS        | 206640 | 207788 | +                | lpxB              | Lipid-A-disaccharide synthase                              |
| G2583_0186 | CDS        | 207785 | 208381 | +                | rnhB              | Ribonuclease HII                                           |
| G2583_0187 | CDS        | 208418 | 211900 | +                | dnaE              | DNA polymerase III subunit alpha                           |
| G2583_0188 | CDS        | 211913 | 212872 | +                | accA              | Acetyl-coenzyme A carboxylase carboxyl transferase subunit |
| G2583_0189 | CDS        | 212971 | 215112 | +                | ldcC              | Lysine decarboxylase, constitutive                         |
| G2583_0190 | CDS        | 215169 | 215558 | +                | yaeR              | Putative lactoylglutathione lyase                          |
| G2583_0191 | CDS        | 215623 | 216918 | +                | tilS              | tRNA(Ile)-lysine synthase (tRNA(Ile)-lysine synthetase)    |
| G2583_0192 | CDS        | 216971 | 217231 | -                | rof               | Rof protein                                                |
| G2583_0193 | CDS        | 217218 | 217436 | -                | yaeP              | hypothetical protein                                       |
| G2583_0194 | CDS        | 217584 | 218129 | +                | yaeQ              | hypothetical protein                                       |
| G2583_0195 | CDS        | 218126 | 218548 | +                | yaeJ              | hypothetical protein                                       |
| G2583_0196 | CDS        | 218562 | 219272 | +                | nlpE              | Copper homeostasis protein CutF                            |
| G2583_0197 | CDS        | 219472 | 220296 | -                | yaeF              | hypothetical protein                                       |
| G2583_0198 | CDS        | 220349 | 222067 | -                | proS              | Prolyl-tRNA synthetase                                     |
| G2583_0199 | CDS        | 222178 | 222885 | -                | yaeB              | hypothetical protein                                       |
| G2583_0200 | CDS        | 222882 | 223286 | -                | rscF              | Regulator in colanic acid synthesis                        |
| G2583_0201 | CDS        | 223404 | 224219 | -                | metQ              | D-methionine-binding lipoprotein metQ precursor            |
| G2583_0202 | CDS        | 224259 | 224912 | -                | metI              | D-methionine transport system permease protein metI        |
| G2583_0203 | CDS        | 224905 | 225936 | -                | metN              | Methionine import ATP-binding protein metN                 |
| G2583_0204 | CDS        | 226124 | 226699 | +                | gmhB              | D,D-heptose 1,7-bisphosphate phosphatase                   |
| G2583_0205 | rRNA       | 227062 | 228603 | +                | rrsH              | 16S ribosomal RNA                                          |
| G2583_0206 | tRNA       | 228672 | 228748 | +                | -                 | Ile tRNA                                                   |
| G2583_0207 | tRNA       | 228790 | 228867 | +                | -                 | Ala tRNA                                                   |
| G2583_0208 | rRNA       | 229050 | 231952 | +                | rrlH              | 23S ribosomal RNA                                          |
| G2583_0209 | rRNA       | 232047 | 232162 | +                | rrfH              | 5S ribosomal RNA                                           |
| G2583_0210 | tRNA       | 232216 | 232294 | +                | -                 | Asp tRNA                                                   |
| G2583_0211 | CDS        | 232456 | 233259 | +                | dkgB              | 2,5-diketo-D-gluconic acid reductase B                     |
| G2583_0212 | CDS        | 233256 | 234170 | -                | yafC              | putative transcriptional regulator LYSR-type               |
| G2583_0213 | CDS        | 234411 | 235211 | +                | yafD              | hypothetical protein                                       |
| G2583_0214 | CDS        | 235289 | 236059 | +                | yafE              | Methyltransferase, UbiE/COQ5 family                        |
| G2583_0215 | CDS        | 236107 | 237465 | -                | mltD              | Membrane-bound lytic murein transglycosylase D precursor   |
| G2583_0216 | CDS        | 237537 | 238292 | -                | gloB              | Hydroxyacylglutathione hydrolase                           |
| G2583_0217 | CDS        | 238308 | 239048 | +                | yafS              | hypothetical protein                                       |
| G2583_0218 | CDS        | 239045 | 239512 | -                | rnhA              | RNase HI                                                   |
| G2583_0219 | CDS        | 239577 | 240308 | +                | dnaQ              | DNA polymerase III, epsilon subunit                        |
| G2583_0220 | tRNA       | 240440 | 240518 | +                | -                 | Asp tRNA                                                   |
| G2583_0221 | CDS        | 240845 | 241645 | +                | yafT              | hypothetical protein                                       |
| G2583_0222 | CDS        | 241830 | 242126 | -                | -                 | hypothetical protein                                       |
| G2583_0223 | CDS        | 242123 | 242578 | -                | -                 | hypothetical protein                                       |
| G2583_0224 | CDS        | 242575 | 243471 | -                | -                 | hypothetical protein                                       |
| G2583_0225 | CDS        | 243492 | 243971 | -                | yhhZ              | hypothetical protein                                       |
| G2583_0226 | CDS        | 243937 | 245436 | -                | ImpA              | ImpA domain protein                                        |
| G2583_0227 | CDS        | 245357 | 248821 | -                | -                 | putative macrophage toxin                                  |
| G2583_0228 | CDS        | 248900 | 250312 | -                | ImpA              | ImpA domain protein                                        |
| G2583_0229 | CDS        | 250317 | 251060 | -                | -                 | Type VI secretion-associated protein, VC_A0118 family      |
| G2583_0230 | CDS        | 251057 | 253840 | -                | clpB              | type VI secretion ATPase, ClpV1 family                     |
| G2583_0231 | CDS        | 253849 | 254610 | -                | -                 | hypothetical protein                                       |
| G2583_0232 | CDS        | 254615 | 255946 | -                | -                 | Uncharacterized protein conserved in bacteria              |
| G2583_0233 | CDS        | 255949 | 256473 | -                | -                 | Type VI secretion lipoprotein, VC_A0113 family             |
| G2583_0234 | CDS        | 256470 | 257480 | -                | -                 | hypothetical protein                                       |
| G2583_0235 | CDS        | 257774 | 258856 | -                | -                 | hypothetical protein                                       |
| G2583_0236 | CDS        | 258820 | 260670 | -                | -                 | hypothetical protein                                       |
| G2583_0237 | CDS        | 260674 | 261087 | -                | -                 | hypothetical protein                                       |
| G2583_0238 | pseudogene | 261094 | 262569 | -                | -                 | hypothetical protein                                       |
| G2583_0239 | CDS        | 262620 | 262844 | -                | -                 | hypothetical protein                                       |
| G2583_0240 | CDS        | 262879 | 263379 | -                | -                 | hypothetical protein                                       |
| G2583_0241 | CDS        | 263806 | 263949 | +                | -                 | hypothetical protein                                       |

| Locus_tag  | Type       | Start  | End    | +/- <sup>a</sup> | Gene <sup>b</sup> | Product                                                 |
|------------|------------|--------|--------|------------------|-------------------|---------------------------------------------------------|
| G2583_0242 | CDS        | 264076 | 264594 | +                | -                 | Hcp                                                     |
| G2583_0243 | CDS        | 264627 | 264764 | +                | -                 | hypothetical protein                                    |
| G2583_0244 | CDS        | 264804 | 266945 | +                | VgrG              | VgrG                                                    |
| G2583_0245 | pseudogene | 267021 | 271253 | +                | rhsG1             | rhsG-1                                                  |
| G2583_0246 | CDS        | 271514 | 272110 | +                | -                 | Ankyrin repeat protein                                  |
| G2583_0247 | pseudogene | 272292 | 273800 | +                | rhsG2             | RhsG-2                                                  |
| G2583_0248 | CDS        | 273803 | 274378 | +                | yibG              | hypothetical protein                                    |
| G2583_0249 | CDS        | 274400 | 274582 | +                | -                 | hypothetical protein                                    |
| G2583_0250 | CDS        | 274726 | 275016 | +                | -                 | Hypothetical membrane protein                           |
| G2583_0251 | CDS        | 275124 | 276260 | +                | yhhI              | ISEc3, transposase                                      |
| G2583_0252 | CDS        | 276263 | 278023 | +                | -                 | unknown protein associated with Rhs element             |
| G2583_0253 | pseudogene | 278007 | 278488 | +                | ycdC              | hypothetical protein                                    |
| G2583_0254 | CDS        | 278669 | 279841 | +                | yncl              | Putative transposase yncl                               |
| G2583_0255 | CDS        | 279959 | 280729 | -                | yafV              | Hydrolase, carbon-nitrogen family                       |
| G2583_0256 | CDS        | 280883 | 281356 | +                | ivy               | Inhibitor of vertebrate lysozyme precursor              |
| G2583_0257 | CDS        | 281399 | 283843 | -                | fadE              | Acyl-coenzyme A dehydrogenase                           |
| G2583_0258 | CDS        | 284083 | 284661 | +                | lpcA              | Phosphoheptose isomerase                                |
| G2583_0259 | CDS        | 284766 | 285533 | +                | yafJ              | Glutamine amidotransferase, class II                    |
| G2583_0260 | CDS        | 285504 | 286244 | -                | yafK              | hypothetical protein                                    |
| G2583_0261 | CDS        | 286400 | 286678 | -                | yafQ              | Addiction module toxin, RelE/StbE family                |
| G2583_0262 | CDS        | 286681 | 286941 | -                | dinJ              | Addiction module antitoxin, RelB/DinJ family            |
| G2583_0263 | CDS        | 287091 | 287900 | +                | yafL              | NlpC/P60 family protein                                 |
| G2583_0264 | CDS        | 288076 | 288372 | +                | yafM              | Putative transposase                                    |
| G2583_0265 | CDS        | 288806 | 290545 | -                | FhiA              | Type III secretion protein, FHIPEP family               |
| G2583_0266 | CDS        | 290490 | 291275 | +                | mbhA              | Putative motility protein                               |
| G2583_0267 | CDS        | 291346 | 292401 | +                | dinB              | DNA polymerase IV                                       |
| G2583_0268 | CDS        | 292453 | 292746 | +                | yafN              | Prevent-host-death family protein                       |
| G2583_0269 | CDS        | 292749 | 293147 | +                | yafO              | putative toxin YafO                                     |
| G2583_0270 | CDS        | 293157 | 293609 | +                | yafP              | Acetyltransferase, GNAT family                          |
| G2583_0271 | CDS        | 293916 | 294182 | +                | ykfJ              | hypothetical protein                                    |
| G2583_0272 | CDS        | 294151 | 294651 | +                | prfH              | Probable peptide chain release factor                   |
| G2583_0273 | CDS        | 294708 | 296165 | -                | pepD              | Aminoacyl-histidine dipeptidase                         |
| G2583_0274 | CDS        | 296426 | 296884 | +                | gpt               | Xanthine phosphoribosyltransferase                      |
| G2583_0275 | CDS        | 296976 | 298220 | +                | frsA              | Esterase frsA                                           |
| G2583_0276 | CDS        | 298278 | 298679 | +                | crl               | Sigma factor-binding protein crl                        |
| G2583_0277 | CDS        | 298718 | 299773 | -                | phoE              | Outer membrane protein (porin)                          |
| G2583_0278 | CDS        | 300061 | 301164 | +                | proB              | Glutamate 5-kinase                                      |
| G2583_0279 | CDS        | 301176 | 302429 | +                | proA              | Gamma-glutamyl phosphate reductase                      |
| G2583_0280 | tRNA       | 302544 | 302619 | +                | -                 | Thr tRNA                                                |
| G2583_0281 | CDS        | 302634 | 303794 | -                | -                 | Site-specific recombinase, phage integrase family       |
| G2583_0282 | CDS        | 304108 | 304452 | -                | -                 | hypothetical protein                                    |
| G2583_0283 | CDS        | 304553 | 305317 | -                | eaA               | hypothetical protein                                    |
| G2583_0284 | CDS        | 305314 | 305820 | -                | -                 | ORF8                                                    |
| G2583_0285 | CDS        | 305817 | 306038 | -                | -                 | hypothetical C4-type zinc finger protein TraR-family    |
| G2583_0286 | CDS        | 306137 | 306418 | -                | -                 | hypothetical protein                                    |
| G2583_0287 | CDS        | 306429 | 306620 | -                | -                 | unknown protein encoded by prophage CP-933K             |
| G2583_0288 | CDS        | 306593 | 306781 | -                | -                 | hypothetical protein                                    |
| G2583_0289 | CDS        | 306772 | 307452 | -                | -                 | Exonuclease                                             |
| G2583_0290 | CDS        | 307449 | 308234 | -                | bet               | Bet protein                                             |
| G2583_0291 | CDS        | 308240 | 308536 | -                | gamW              | Gam protein                                             |
| G2583_0292 | CDS        | 308722 | 308988 | -                | -                 | antitermination protein                                 |
| G2583_0293 | CDS        | 309110 | 309232 | -                | ral               | Lambda ant-restriction protein                          |
| G2583_0294 | CDS        | 309577 | 310059 | +                | -                 | Superinfection exclusion protein B                      |
| G2583_0295 | CDS        | 310060 | 310383 | -                | -                 | Antitermination protein                                 |
| G2583_0296 | CDS        | 310735 | 311046 | -                | -                 | Gene 38 protein                                         |
| G2583_0297 | CDS        | 311136 | 311768 | -                | ymfK              | SOS-response transcriptional repressors                 |
| G2583_0298 | CDS        | 311872 | 312087 | +                | -                 | gene 40 protein                                         |
| G2583_0299 | CDS        | 312207 | 312500 | +                | -                 | Phage regulatory protein                                |
| G2583_0300 | CDS        | 312533 | 313432 | +                | -                 | Putative replication protein O of bacteriophage         |
| G2583_0301 | CDS        | 313429 | 314130 | +                | -                 | putative replication protein P of bacteriophage BP-933W |

| Locus_tag  | Type       | Start  | End    | +/- <sup>a</sup> | Gene <sup>b</sup> | Product                                                       |
|------------|------------|--------|--------|------------------|-------------------|---------------------------------------------------------------|
| G2583_0302 | CDS        | 314127 | 314417 | +                | -                 | Ren protein                                                   |
| G2583_0303 | CDS        | 314491 | 314931 | +                | ninB              | Unknown protein encoded within prophage                       |
| G2583_0304 | CDS        | 314928 | 315455 | +                | -                 | Putative DNA N-6-adenine-methyltransferase of bacteriophage   |
| G2583_0305 | CDS        | 315452 | 315634 | +                | ninE              | NinE protein                                                  |
| G2583_0306 | CDS        | 315794 | 316399 | +                | NinG              | NinG protein                                                  |
| G2583_0307 | CDS        | 316396 | 317067 | +                | -                 | Serine/threonine-protein phosphatase 1                        |
| G2583_0308 | CDS        | 317058 | 317576 | +                | -                 | putative antitermination protein                              |
| G2583_5263 | tRNA       | 317640 | 317714 | +                | -                 | Asn tRNA                                                      |
| G2583_5264 | tRNA       | 317720 | 317795 | +                | -                 | Thr tRNA                                                      |
| G2583_5265 | tRNA       | 317799 | 317873 | +                | -                 | Gly tRNA                                                      |
| G2583_0309 | CDS        | 317979 | 318209 | +                | -                 | conserved hypothetical protein                                |
| G2583_0310 | CDS        | 318392 | 320347 | +                | YjhS              | YjhS                                                          |
| G2583_0311 | CDS        | 320610 | 320786 | -                | -                 | hypothetical protein                                          |
| G2583_0312 | CDS        | 320794 | 321000 | +                | -                 | Putative lysis protein S of prophage CP-933V                  |
| G2583_0313 | CDS        | 321000 | 321497 | +                | ybcS              | Phage-related lysozyme (muraminidase)                         |
| G2583_0314 | CDS        | 321482 | 321958 | +                | -                 | Putative Rz endopeptidase from lambdoid prophage DLP12        |
| G2583_0315 | CDS        | 322041 | 322181 | +                | -                 | unknown protein encoded within prophage CP-933R               |
| G2583_0316 | CDS        | 322423 | 322737 | +                | -                 | Putative transcriptional regulator                            |
| G2583_0317 | CDS        | 322818 | 323042 | -                | ynfO              | unknown protein encoded within prophage CP-933R               |
| G2583_0318 | CDS        | 323197 | 323322 | +                | -                 | Prophage Qin DNA packaging protein NU1-like protein           |
| G2583_0319 | CDS        | 323444 | 323953 | +                | -                 | Prophage Qin DNA packaging protein NU1-like protein           |
| G2583_0320 | CDS        | 323889 | 325853 | +                | -                 | Putative terminase large subunit of prophage CP-933O          |
| G2583_0321 | CDS        | 325837 | 326043 | +                | -                 | Head-stabilizing protein                                      |
| G2583_0322 | CDS        | 326040 | 327632 | +                | -                 | Putative capsid protein of prophage                           |
| G2583_0323 | CDS        | 327622 | 329127 | +                | -                 | Head-tail preconnector protein GP5                            |
| G2583_0324 | CDS        | 329164 | 329511 | +                | -                 | Head decoration protein                                       |
| G2583_0325 | CDS        | 329569 | 330597 | +                | -                 | Major head protein                                            |
| G2583_0326 | CDS        | 330649 | 331023 | +                | -                 | Uncharacterized 13.5 kDa protein in GP7-GP8 intergenic region |
| G2583_0327 | CDS        | 331016 | 331369 | +                | -                 | Putative head-tail joining protein of prophage                |
| G2583_0328 | CDS        | 331381 | 331914 | +                | -                 | Prophage minor tail protein Z                                 |
| G2583_0329 | CDS        | 331911 | 332306 | +                | -                 | Minor tail protein U                                          |
| G2583_0330 | CDS        | 332284 | 333054 | +                | -                 | Putative tail component of prophage CP-933X                   |
| G2583_0331 | CDS        | 333070 | 333492 | +                | -                 | Putative tail component of prophage                           |
| G2583_0332 | CDS        | 333474 | 333908 | +                | -                 | Minor tail protein T                                          |
| G2583_0333 | CDS        | 333901 | 336450 | +                | -                 | Phage-related minor tail protein                              |
| G2583_0334 | CDS        | 336447 | 336776 | +                | -                 | minor tail protein                                            |
| G2583_0335 | CDS        | 336776 | 337474 | +                | -                 | Phage-related protein                                         |
| G2583_0336 | CDS        | 337480 | 338223 | +                | -                 | Tail assembly protein                                         |
| G2583_0337 | CDS        | 338121 | 338792 | +                | -                 | Tail assembly protein I                                       |
| G2583_0338 | CDS        | 338853 | 342266 | +                | -                 | Phage-related protein, tail component                         |
| G2583_0339 | CDS        | 342337 | 342936 | +                | lomK              | Enterobacterial Ail/Lom family protein                        |
| G2583_0340 | CDS        | 342990 | 344312 | +                | -                 | Putative tail fiber protein                                   |
| G2583_0341 | CDS        | 344689 | 345267 | +                | nleG              | hypothetical protein                                          |
| G2583_0342 | CDS        | 345587 | 345904 | -                | -                 | PotB, trcA, ORF2, ORF3, ORF4 genes,                           |
| G2583_0343 | CDS        | 346007 | 346633 | -                | -                 | PotB, trcA, ORF2, ORF3, ORF4 genes,                           |
| G2583_0344 | CDS        | 346816 | 347406 | +                | lpgB              | Putative chaperone protein                                    |
| G2583_0345 | CDS        | 347651 | 347782 | +                | -                 | Tail fiber assembly protein                                   |
| G2583_0346 | CDS        | 348095 | 348235 | -                | intR              | Putative integrase for prophage CP-933R                       |
| G2583_0347 | CDS        | 348406 | 349386 | +                | -                 | NleB                                                          |
| G2583_0348 | CDS        | 349463 | 349741 | -                | -                 | hypothetical protein                                          |
| G2583_0349 | CDS        | 349803 | 350270 | -                | gogB              | conserved hypothetical protein                                |
| G2583_0350 | CDS        | 350472 | 351164 | -                | -                 | conserved hypothetical protein                                |
| G2583_0351 | CDS        | 351744 | 352976 | +                | -                 | Integrase protein for prophage CP-933I                        |
| G2583_0352 | CDS        | 352980 | 353396 | +                | -                 | unknown protein encoded in prophage CP-933I                   |
| G2583_0353 | CDS        | 353369 | 353986 | +                | -                 | unknown protein encoded in prophage CP-933I                   |
| G2583_0354 | CDS        | 353986 | 354444 | +                | -                 | unknown protein encoded in prophage CP-933I                   |
| G2583_0355 | pseudogene | 354437 | 355071 | +                | -                 | hypothetical protein                                          |
| G2583_0356 | CDS        | 355101 | 355622 | +                | -                 | unknown protein encoded in prophage CP-933I                   |
| G2583_0357 | CDS        | 355690 | 356256 | +                | -                 | unknown protein encoded in prophage CP-933I                   |
| G2583_0358 | CDS        | 356666 | 356938 | -                | ogrK              | Putative activator encoded in prophage CP-933I                |

| Locus_tag  | Type       | Start  | End    | +/- <sup>a</sup> | Gene <sup>b</sup> | Product                                                  |
|------------|------------|--------|--------|------------------|-------------------|----------------------------------------------------------|
| G2583_0359 | CDS        | 356944 | 357495 | -                | psul              | Putative polarity suppression protein encoded in CP-933I |
| G2583_0360 | CDS        | 357492 | 358244 | -                | sidI              | Putative capsid morphogenesis protein encoded in CP-933I |
| G2583_0361 | CDS        | 358632 | 358802 | +                | -                 | unknown protein encoded in prophage CP-933I              |
| G2583_0362 | CDS        | 359163 | 359423 | +                | alpA              | Phage DNA binding protein                                |
| G2583_0363 | CDS        | 359420 | 359977 | +                | -                 | putative CI repressor                                    |
| G2583_0364 | CDS        | 359974 | 360195 | +                | -                 | hypothetical protein                                     |
| G2583_0365 | CDS        | 360195 | 360518 | +                | -                 | unknown protein encoded in prophage CP-933I              |
| G2583_0366 | CDS        | 360475 | 362865 | +                | -                 | Alpha replication protein of prophage CP-933I            |
| G2583_0367 | CDS        | 362998 | 363954 | -                | -                 | unknown protein encoded in prophage CP-933I              |
| G2583_0368 | CDS        | 364629 | 365528 | -                | yagP              | putative LysR-like transcriptional regulator             |
| G2583_0369 | CDS        | 365627 | 366349 | +                | -                 | Clavaldehyde dehydrogenase                               |
| G2583_0370 | CDS        | 366515 | 366793 | +                | -                 | hypothetical protein                                     |
| G2583_0371 | CDS        | 367068 | 367217 | +                | -                 | hypothetical protein                                     |
| G2583_0372 | CDS        | 367496 | 368398 | -                | -                 | LysR substrate binding domain protein                    |
| G2583_0373 | CDS        | 368566 | 369702 | +                | -                 | Hydrolase of the alpha/beta superfamily                  |
| G2583_0374 | CDS        | 369778 | 370971 | +                | -                 | Purine ribonucleoside efflux pump NepI                   |
| G2583_0375 | pseudogene | 371091 | 372107 | -                | yagQ              | Putative xanthine dehydrogenase accessory factor         |
| G2583_0376 | CDS        | 372117 | 374315 | -                | yagR              | Putative xanthine dehydrogenase yagR molybdenum-binding  |
| G2583_0377 | CDS        | 374312 | 375268 | -                | yagS              | FAD binding domain in molybdopterin dehydrogenase        |
| G2583_0378 | CDS        | 375265 | 375954 | -                | yagT              | Putative xanthine dehydrogenase yagT iron-sulfur-binding |
| G2583_0379 | CDS        | 376372 | 376986 | +                | yagU              | Inner membrane protein yagU                              |
| G2583_0380 | CDS        | 377234 | 377563 | -                | ykgJ              | putative ferredoxin                                      |
| G2583_0381 | CDS        | 377876 | 378631 | -                | yagV              | hypothetical protein                                     |
| G2583_0382 | CDS        | 378555 | 380198 | -                | yagW              | putative receptor                                        |
| G2583_0383 | CDS        | 380188 | 382713 | -                | yagX              | putative enzyme                                          |
| G2583_0384 | CDS        | 382739 | 383407 | -                | matC              | hypothetical protein                                     |
| G2583_0385 | CDS        | 383465 | 384052 | -                | matB              | hypothetical protein                                     |
| G2583_0386 | CDS        | 384127 | 384717 | -                | matA              | MatA                                                     |
| G2583_0387 | CDS        | 385122 | 385346 | -                | -                 | hypothetical protein                                     |
| G2583_0388 | CDS        | 385493 | 385684 | +                | ykgL              | hypothetical protein                                     |
| G2583_0389 | CDS        | 385754 | 385894 | -                | ykgO              | 50S ribosomal protein L36                                |
| G2583_0390 | CDS        | 385894 | 386160 | -                | ykgM              | Ribosomal protein L31                                    |
| G2583_0391 | CDS        | 387096 | 388238 | -                | -                 | Oxidoreductase, FAD/FMN-binding                          |
| G2583_0392 | CDS        | 388473 | 389393 | -                | ycjY              | hypothetical protein                                     |
| G2583_0393 | CDS        | 389487 | 390476 | +                | ycaN              | Putative LysR-like transcriptional regulator             |
| G2583_0394 | CDS        | 390764 | 391120 | -                | -                 | hypothetical protein                                     |
| G2583_0395 | CDS        | 391151 | 391279 | +                | -                 | hypothetical protein                                     |
| G2583_0396 | CDS        | 391313 | 391888 | -                | -                 | 2,5-diketo-D-gluconic acid reductase A                   |
| G2583_0397 | CDS        | 392454 | 396707 | +                | eaeH              | Attaching and effacing protein-like protein precursor    |
| G2583_0398 | CDS        | 396828 | 397718 | -                | ykgA              | Putative AraC-like transcriptional regulator             |
| G2583_0399 | CDS        | 397919 | 398803 | +                | -                 | Putative dehydrogenase                                   |
| G2583_0400 | CDS        | 398963 | 399556 | -                | ykgB              | protein of unknown function DUF417                       |
| G2583_0401 | CDS        | 399539 | 399808 | +                | -                 | hypothetical protein                                     |
| G2583_0402 | CDS        | 399568 | 399819 | -                | ykgI              | hypothetical protein                                     |
| G2583_0403 | CDS        | 399913 | 401238 | -                | ykgC              | Pyridine nucleotide-disulphide oxidoreductase            |
| G2583_0404 | CDS        | 401464 | 402318 | +                | ykgD              | Hypothetical transcriptional regulator ykgD              |
| G2583_0405 | CDS        | 402845 | 403564 | +                | ykgE              | Cysteine-rich domain protein                             |
| G2583_0406 | CDS        | 403575 | 405002 | +                | ykgF              | Iron-sulfur cluster binding protein                      |
| G2583_0407 | CDS        | 404995 | 405690 | +                | ykgG              | hypothetical protein                                     |
| G2583_0408 | CDS        | 405645 | 405857 | -                | -                 | hypothetical protein                                     |
| G2583_0409 | pseudogene | 405933 | 406601 | -                | ykgH              | hypothetical protein                                     |
| G2583_0410 | CDS        | 406783 | 409080 | -                | -                 | Putative autotransporter                                 |
| G2583_0411 | CDS        | 409122 | 409883 | -                | -                 | hypothetical protein                                     |
| G2583_0412 | CDS        | 410037 | 410831 | -                | -                 | hypothetical protein                                     |
| G2583_0413 | pseudogene | 411161 | 411723 | -                | fimX              | Site-specific recombinase, phage integrase family        |
| G2583_0414 | CDS        | 412531 | 412782 | +                | -                 | hypothetical protein                                     |
| G2583_0415 | CDS        | 412784 | 414472 | -                | betA              | Choline dehydrogenase                                    |
| G2583_0416 | CDS        | 414486 | 415958 | -                | betB              | Betaine aldehyde dehydrogenase                           |
| G2583_0417 | CDS        | 415972 | 416577 | -                | betI              | Transcriptional regulator                                |
| G2583_0418 | CDS        | 416688 | 418721 | +                | betT              | High-affinity choline transport protein                  |

| Locus_tag  | Type       | Start  | End    | +/- <sup>a</sup> | Gene <sup>b</sup> | Product                                                       |
|------------|------------|--------|--------|------------------|-------------------|---------------------------------------------------------------|
| G2583_0419 | CDS        | 419229 | 423278 | +                | AidA-I            | AidA-I adhesin-like protein                                   |
| G2583_0420 | CDS        | 423411 | 424508 | +                | yahA              | LuxR-family transcriptional regulator/cyclic diguanylate      |
| G2583_0421 | pseudogene | 424550 | 425481 | -                | yahB              | Uncharacterized HTH-type transcriptional regulator yahB       |
| G2583_0422 | pseudogene | 425573 | 426090 | -                | yahC              | Uncharacterized protein yahC                                  |
| G2583_0423 | CDS        | 426348 | 426953 | +                | yahD              | Ankyrin repeat protein                                        |
| G2583_0424 | CDS        | 426993 | 427856 | +                | yahE              | hypothetical protein                                          |
| G2583_0425 | CDS        | 427846 | 429393 | +                | yahF              | Bacterial FdrA protein                                        |
| G2583_0426 | CDS        | 429393 | 430811 | +                | yahG              | hypothetical protein                                          |
| G2583_0427 | CDS        | 430830 | 431294 | +                | yahH              | hypothetical protein                                          |
| G2583_0428 | CDS        | 431326 | 432276 | +                | yahI              | Carbamate kinase family protein                               |
| G2583_0429 | CDS        | 432286 | 433668 | +                | yahJ              | Amidohydrolase family protein                                 |
| G2583_0430 | CDS        | 433937 | 434377 | +                | -                 | hypothetical protein                                          |
| G2583_0431 | CDS        | 434628 | 435614 | +                | -                 | Sugar ABC transporter, periplasmic sugar-binding protein      |
| G2583_0432 | CDS        | 435663 | 437147 | +                | -                 | Sugar ABC transporter, ATP-binding protein                    |
| G2583_0433 | CDS        | 437140 | 438111 | +                | -                 | Putative permease component of transport system, probably     |
| G2583_0434 | CDS        | 438108 | 439064 | +                | -                 | Putative permease component of transport system               |
| G2583_0435 | CDS        | 439151 | 440200 | +                | yahK              | Oxidoreductase, zinc-binding dehydrogenase family             |
| G2583_0436 | CDS        | 440443 | 441258 | +                | yahL              | hypothetical protein                                          |
| G2583_0437 | tRNA       | 441604 | 441684 | +                | -                 | Xaa tRNA                                                      |
| G2583_0438 | CDS        | 441743 | 441919 | +                | yahM              | hypothetical protein                                          |
| G2583_0439 | CDS        | 441936 | 442607 | -                | yahN              | Putative homoserine/threonine efflux protein                  |
| G2583_0440 | CDS        | 442754 | 443029 | +                | yahO              | hypothetical protein                                          |
| G2583_0441 | CDS        | 443127 | 444713 | -                | prpR              | Propionate catabolism operon regulatory protein PrpR          |
| G2583_0442 | CDS        | 444952 | 445842 | +                | prpB              | Methylisocitrate lyase                                        |
| G2583_0443 | CDS        | 445998 | 447167 | +                | prpC              | 2-methylcitrate synthase                                      |
| G2583_0444 | CDS        | 447201 | 448652 | +                | prpD              | 2-methylcitrate dehydratase                                   |
| G2583_0445 | CDS        | 448692 | 450578 | +                | prpE              | Propionate--CoA ligase                                        |
| G2583_0446 | pseudogene | 450583 | 450820 | +                | nrdB              | mannitol-1-phosphate 5-dehydrogenase                          |
| G2583_0447 | CDS        | 451284 | 452543 | +                | codB              | Cytosine permease                                             |
| G2583_0448 | CDS        | 452533 | 453816 | +                | codA              | Cytosine deaminase and related metal-dependent hydrolases     |
| G2583_0449 | CDS        | 453949 | 454872 | -                | cynR              | DNA-binding transcriptional regulator CynR                    |
| G2583_0450 | CDS        | 454958 | 455617 | +                | cynT              | Carbonic anhydrase 1                                          |
| G2583_0451 | CDS        | 455648 | 456118 | +                | cynS              | Cyanate hydratase                                             |
| G2583_0452 | CDS        | 456151 | 457305 | +                | cynX              | Cyanate transport                                             |
| G2583_0453 | CDS        | 457408 | 458019 | -                | lacA              | Galactoside O-acetyltransferase LacA                          |
| G2583_0454 | CDS        | 458085 | 459338 | -                | lacY              | Lactose permease                                              |
| G2583_0455 | CDS        | 459390 | 462464 | -                | lacZ              | Beta-D-galactosidase                                          |
| G2583_0456 | CDS        | 462587 | 463678 | -                | lacI              | lac repressor                                                 |
| G2583_0457 | CDS        | 463706 | 464659 | -                | -                 | putative AraC-like transcriptional regulator                  |
| G2583_0458 | CDS        | 464679 | 465467 | -                | -                 | Beta-lactamase fold protein                                   |
| G2583_0459 | CDS        | 465570 | 466517 | -                | mhpR              | DNA-binding transcriptional activator, 3HPP-binding           |
| G2583_0460 | CDS        | 466594 | 468258 | +                | mhpA              | 3-(3-hydroxy-phenyl)propionate/3-hydroxycinnamic acid         |
| G2583_0461 | CDS        | 468260 | 469204 | +                | mhpB              | 2,3-dihydroxyphenylpropionate/2,3-dihydroxycinnamic acid 1,2- |
| G2583_0462 | CDS        | 469159 | 470088 | +                | mhpC              | 2-hydroxy-6-oxononadienedioate/2-hydroxy-6-                   |
| G2583_0463 | CDS        | 470098 | 470907 | +                | mhpD              | 2-keto-4-pentenoate hydratase                                 |
| G2583_0464 | CDS        | 470904 | 471854 | +                | mhpF              | Acetaldehyde dehydrogenase                                    |
| G2583_0465 | CDS        | 471851 | 472864 | +                | mhpE              | 4-hydroxy-2-oxovalerate aldolase                              |
| G2583_0466 | CDS        | 473298 | 474554 | +                | mhpT              | Putative transport protein                                    |
| G2583_0467 | CDS        | 474656 | 475195 | +                | yaiL              | Nucleoprotein/polynucleotide-associated enzyme                |
| G2583_0468 | CDS        | 475320 | 476153 | -                | frmB              | putative esterase                                             |
| G2583_0469 | CDS        | 476246 | 477355 | -                | frmA              | S-(hydroxymethyl)glutathione dehydrogenase                    |
| G2583_0470 | CDS        | 477390 | 477686 | -                | frmR              | regulator protein FrmR                                        |
| G2583_0471 | CDS        | 477825 | 478871 | -                | afuC              | Fe(3+) ions import ATP-binding protein fbpC                   |
| G2583_0472 | CDS        | 478883 | 480961 | -                | afuB              | Binding-protein-dependent transport systems inner membrane    |
| G2583_0473 | CDS        | 481030 | 482061 | -                | afuA              | Periplasmic ferric iron-binding protein                       |
| G2583_0474 | CDS        | 482058 | 483362 | -                | UhpC              | putative permease; hexosephosphate transport                  |
| G2583_0475 | CDS        | 483447 | 484988 | -                | -                 | Integral membrane sensor signal transduction histidine kinase |
| G2583_0476 | CDS        | 484988 | 485617 | -                | -                 | Putative response regulator                                   |
| G2583_0477 | CDS        | 485920 | 486882 | +                | tauA              | Taurine transport system periplasmic protein                  |
| G2583_0478 | CDS        | 486895 | 487662 | +                | tauB              | Taurine import ATP-binding protein tauB                       |



| Locus_tag  | Type | Start  | End    | +/- <sup>a</sup> | Gene <sup>b</sup> | Product                                                      |
|------------|------|--------|--------|------------------|-------------------|--------------------------------------------------------------|
| G2583_0479 | CDS  | 487659 | 488486 | +                | tauC              | ABC-type nitrate/sulfonate/bicarbonate transport system,     |
| G2583_0480 | CDS  | 488483 | 489334 | +                | tauD              | Taurine dioxygenase                                          |
| G2583_0481 | CDS  | 489441 | 490448 | -                | hemB              | Delta-aminolevulinic acid dehydratase                        |
| G2583_0482 | CDS  | 490941 | 493883 | +                | yaiU              | Putative flagellin structural protein                        |
| G2583_0483 | CDS  | 493926 | 494594 | +                | yaiV              | putative DNA-binding transcriptional regulator               |
| G2583_0484 | CDS  | 494595 | 495752 | -                | ampH              | Penicillin-binding protein ampH                              |
| G2583_0485 | CDS  | 496104 | 497324 | +                | sbmA              | Inner-membrane transport protein, Microcin 25                |
| G2583_0486 | CDS  | 497337 | 498431 | +                | yaiW              | hypothetical protein                                         |
| G2583_0487 | CDS  | 498490 | 498798 | -                | yaiY              | Inner membrane protein yaiY                                  |
| G2583_0488 | CDS  | 498926 | 499270 | +                | yaiZ              | hypothetical protein                                         |
| G2583_0489 | CDS  | 499294 | 500388 | -                | ddlA              | D-alanine--D-alanine ligase A                                |
| G2583_0490 | CDS  | 500851 | 501111 | +                | iraP              | Anti-adaptor protein iraP                                    |
| G2583_0491 | CDS  | 501143 | 502627 | +                | phoA              | Alkaline phosphatase                                         |
| G2583_0492 | CDS  | 502728 | 503066 | +                | psiF              | Phosphate starvation-inducible protein                       |
| G2583_0493 | CDS  | 503168 | 504283 | +                | adrA              | MASE2 domain/diguanylate cyclase                             |
| G2583_0494 | CDS  | 504300 | 505109 | -                | proC              | Pyrroline-5-carboxylate reductase                            |
| G2583_0495 | CDS  | 505229 | 505687 | +                | yaiI              | hypothetical protein                                         |
| G2583_0496 | CDS  | 505870 | 506394 | +                | aroL              | Shikimate kinase 2                                           |
| G2583_0497 | CDS  | 506444 | 506635 | +                | yaiA              | hypothetical protein                                         |
| G2583_0498 | CDS  | 506893 | 507570 | +                | aroM              | AroM protein                                                 |
| G2583_0499 | CDS  | 507642 | 507926 | +                | yaiE              | UPF0345 protein yaiE                                         |
| G2583_0500 | CDS  | 508184 | 510349 | +                | ydbD              | hypothetical protein                                         |
| G2583_0501 | CDS  | 510346 | 510801 | +                | -                 | hypothetical protein                                         |
| G2583_0502 | CDS  | 510879 | 511790 | -                | rdgC              | Recombination-associated protein rdgC                        |
| G2583_0503 | CDS  | 511915 | 512823 | +                | mak               | Possible NAGC-like transcriptional regulator                 |
| G2583_0504 | CDS  | 512966 | 514234 | -                | araJ              | protein AraJ                                                 |
| G2583_0505 | CDS  | 514276 | 517419 | -                | sbcC              | Nuclease SbcCD, C subunit                                    |
| G2583_0506 | CDS  | 517416 | 518618 | -                | sbcD              | Nuclease sbcCD subunit D                                     |
| G2583_0507 | CDS  | 518808 | 519497 | +                | phoB              | Positive response regulator for pho regulon                  |
| G2583_0508 | CDS  | 519555 | 520850 | +                | phoR              | Signal transduction histidine kinase                         |
| G2583_0509 | CDS  | 521257 | 522576 | +                | brnQ              | Branched-chain amino acid transport system 2 carrier protein |
| G2583_0510 | CDS  | 522652 | 524025 | +                | proY              | Proline-specific permease proY                               |
| G2583_0511 | CDS  | 524181 | 525998 | +                | malZ              | Maltodextrin glucosidase                                     |
| G2583_0512 | CDS  | 526186 | 527631 | +                | -                 | hypothetical protein                                         |
| G2583_0513 | CDS  | 527652 | 528233 | -                | acpH              | Acyl carrier protein phosphodiesterase                       |
| G2583_0514 | CDS  | 528325 | 529395 | +                | queA              | S-adenosylmethionine:tRNA ribosyltransferase-isomerase       |
| G2583_0515 | CDS  | 529450 | 530577 | +                | tgt               | Queuine tRNA-ribosyltransferase                              |
| G2583_0516 | CDS  | 530600 | 530932 | +                | yajC              | UPF0092 membrane protein yajC                                |
| G2583_0517 | CDS  | 530960 | 532807 | +                | secD              | Protein-export membrane protein secD                         |
| G2583_0518 | CDS  | 532818 | 533789 | +                | secF              | Protein-export membrane protein SecF                         |
| G2583_0519 | CDS  | 533941 | 534183 | +                | -                 | UPF0156 protein Z0509/ECs0461                                |
| G2583_0520 | CDS  | 534176 | 534457 | +                | -                 | Plasmid stabilization system protein, RelE/ParE family       |
| G2583_0521 | CDS  | 534545 | 534892 | +                | yajD              | hypothetical protein                                         |
| G2583_0522 | CDS  | 535069 | 535953 | -                | tsx               | Nucleoside-specific channel-forming protein, Tsx             |
| G2583_0523 | CDS  | 536252 | 536791 | -                | yajI              | hypothetical protein                                         |
| G2583_0524 | CDS  | 536942 | 537391 | +                | nrdR              | ATP-cone domain protein                                      |
| G2583_0525 | CDS  | 537395 | 538498 | +                | ribD              | Bifunctional deaminase-reductase, C-terminal:Riboflavin      |
| G2583_0526 | CDS  | 538587 | 539057 | +                | ribE              | 6,7-dimethyl-8-ribityllumazine synthase                      |
| G2583_0527 | CDS  | 539077 | 539496 | +                | nusB              | N utilization substance protein B-like protein               |
| G2583_0528 | CDS  | 539574 | 540551 | +                | thiL              | Thiamine-monophosphate kinase                                |
| G2583_0529 | CDS  | 540529 | 541044 | +                | pgpA              | Phosphatidylglycerophosphatase A                             |
| G2583_0530 | CDS  | 541222 | 542793 | -                | -                 | hypothetical protein                                         |
| G2583_0531 | CDS  | 543024 | 543998 | -                | yajO              | Oxidoreductase, aldo/keto reductase family                   |
| G2583_0532 | CDS  | 544053 | 545915 | -                | dxs               | 1-deoxy-D-xylulose-5-phosphate synthase                      |
| G2583_0533 | CDS  | 545940 | 546839 | -                | ispA              | Geranyltranstransferase                                      |
| G2583_0534 | CDS  | 546839 | 547081 | -                | xseB              | Exodeoxyribonuclease 7 small subunit                         |
| G2583_0535 | CDS  | 547287 | 548735 | +                | thiI              | Thiamine biosynthesis protein thiI                           |
| G2583_0536 | CDS  | 548789 | 549385 | -                | yajL              | 4-methyl-5(Beta-hydroxyethyl)-thiazole monophosphate         |
| G2583_0537 | CDS  | 549342 | 550253 | -                | panE              | 2-dehydropantoate 2-reductase                                |
| G2583_0538 | CDS  | 550421 | 550912 | +                | yajQ              | UPF0234 protein yajQ                                         |

| Locus_tag  | Type  | Start  | End    | +/- <sup>a</sup> | Gene <sup>b</sup> | Product                                                       |
|------------|-------|--------|--------|------------------|-------------------|---------------------------------------------------------------|
| G2583_0539 | CDS   | 551040 | 552410 | -                | yajR              | Hypothetical transport protein YajR                           |
| G2583_0540 | CDS   | 552553 | 553443 | -                | cyoE              | Protoheme IX farnesyltransferase                              |
| G2583_0541 | CDS   | 553455 | 553784 | -                | cyoD              | Cytochrome O ubiquinol oxidase protein CyoD                   |
| G2583_0542 | CDS   | 553784 | 554398 | -                | cyoC              | Cytochrome o ubiquinol oxidase subunit 3                      |
| G2583_0543 | CDS   | 554388 | 556379 | -                | cyoB              | Ubiquinol oxidase subunit 1 (Ubiquinol oxidase polypeptide I) |
| G2583_0544 | CDS   | 556401 | 557348 | -                | cyoA              | Cytochrome o ubiquinol oxidase, subunit II                    |
| G2583_0545 | CDS   | 557808 | 559283 | -                | ampG              | Regulates beta-lactamase synthesis                            |
| G2583_0546 | CDS   | 559327 | 559905 | -                | yajG              | hypothetical protein                                          |
| G2583_0547 | CDS   | 560210 | 560527 | +                | bolA              | transcriptional regulator BolA                                |
| G2583_0548 | CDS   | 560871 | 562169 | +                | tig               | Trigger factor                                                |
| G2583_0549 | CDS   | 562415 | 563038 | +                | clpP              | ATP-dependent Clp protease proteolytic subunit                |
| G2583_0550 | CDS   | 563164 | 564438 | +                | clpX              | ATP-dependent Clp protease ATP-binding subunit clpX           |
| G2583_0551 | CDS   | 564581 | 566980 | +                | lon               | DNA-binding ATP-dependent protease La                         |
| G2583_0552 | CDS   | 567189 | 567461 | +                | hupB              | DNA-binding protein HU-beta                                   |
| G2583_0553 | CDS   | 567653 | 569524 | +                | ppiD              | Peptidylprolyl isomerase                                      |
| G2583_0554 | CDS   | 569675 | 570046 | +                | ybaV              | Competence protein ComEA                                      |
| G2583_0555 | CDS   | 570152 | 570550 | +                | ybaW              | Thioesterase family protein                                   |
| G2583_0556 | CDS   | 570602 | 571297 | -                | queC              | Queuosine biosynthesis protein queC                           |
| G2583_0557 | CDS   | 571362 | 573077 | -                | ybaE              | Bacterial extracellular solute-binding protein, family 5      |
| G2583_0558 | CDS   | 573150 | 573980 | +                | cof               | Predicted hydrolases of the HAD superfamily                   |
| G2583_0559 | CDS   | 574006 | 574590 | +                | ybaO              | Putative transcriptional regulator YbaO                       |
| G2583_0560 | CDS   | 574620 | 576392 | +                | mdIA              | Multidrug resistance, ATP-binding protein mdIA                |
| G2583_0561 | CDS   | 576385 | 578166 | +                | mdIB              | Multidrug resistance-like ATP-binding protein mdIB            |
| G2583_0562 | CDS   | 578347 | 578685 | +                | glnK              | Glutamine synthetase regulation protein                       |
| G2583_0563 | CDS   | 578715 | 580001 | +                | amtB              | Ammonia channel precursor                                     |
| G2583_0564 | CDS   | 580050 | 580910 | -                | tesB              | Acyl-CoA thioesterase II                                      |
| G2583_0565 | CDS   | 581128 | 581700 | +                | ybaY              | Glycoprotein/polysaccharide metabolism precursor              |
| G2583_0566 | CDS   | 581733 | 582122 | -                | ybaZ              | hypothetical protein                                          |
| G2583_0567 | ncRNA | 582207 | 582304 | +                | srpB              | ncRNA                                                         |
| G2583_0568 | CDS   | 582423 | 582776 | +                | ybaA              | hypothetical protein                                          |
| G2583_0569 | CDS   | 582818 | 584374 | -                | ylaB              | hypothetical protein                                          |
| G2583_0570 | CDS   | 584532 | 585041 | -                | ylaC              | hypothetical protein                                          |
| G2583_0571 | CDS   | 585119 | 585670 | -                | maa               | Maltose O-acetyltransferase                                   |
| G2583_0572 | CDS   | 585842 | 586060 | -                | hha               | Haemolysin expression modulating protein                      |
| G2583_0573 | CDS   | 586086 | 586460 | -                | ybaJ              | hypothetical protein                                          |
| G2583_0574 | CDS   | 587006 | 590155 | -                | acrB              | Acriflavine resistance protein B                              |
| G2583_0575 | CDS   | 590178 | 591371 | -                | acrA              | Acriflavine resistance protein A                              |
| G2583_0576 | CDS   | 591513 | 592160 | +                | acrR              | DNA-binding transcriptional repressor                         |
| G2583_0577 | CDS   | 592288 | 595650 | +                | kefA              | Potassium efflux system KefA                                  |
| G2583_0578 | CDS   | 595689 | 595853 | -                | ybaM              | hypothetical protein                                          |
| G2583_0579 | CDS   | 595867 | 596394 | -                | priC              | Primosomal replication protein N"                             |
| G2583_0580 | CDS   | 596464 | 596841 | +                | ybaN              | Inner membrane protein ybaN                                   |
| G2583_0581 | CDS   | 596994 | 597545 | +                | apt               | Adenine phosphoribosyltransferase                             |
| G2583_0582 | CDS   | 597674 | 599605 | +                | dnaX              | DNA polymerase III, tau subunit                               |
| G2583_0583 | CDS   | 599658 | 599987 | +                | ybaB              | UPF0133 protein ybaB                                          |
| G2583_0584 | CDS   | 599987 | 600592 | +                | recR              | Recombination protein recR                                    |
| G2583_0585 | CDS   | 600702 | 602576 | +                | htpG              | Chaperone protein htpG                                        |
| G2583_0586 | CDS   | 602697 | 603401 | +                | adk               | Adenylate kinase                                              |
| G2583_0587 | CDS   | 603533 | 604495 | +                | hemH              | Ferrocyclase                                                  |
| G2583_0588 | CDS   | 604492 | 605451 | -                | aes               | Acetyl esterase                                               |
| G2583_0589 | CDS   | 605603 | 606907 | +                | gsk               | Inosine-guanosine kinase                                      |
| G2583_0590 | CDS   | 607040 | 608716 | -                | ybaL              | Transporter, monovalent cation:proton antiporter-2 family     |
| G2583_0591 | CDS   | 608954 | 610174 | -                | fsr               | Fosmidomycin resistance protein                               |
| G2583_0592 | CDS   | 610392 | 612044 | +                | ushA              | UDP-sugar hydrolase/5'-nucleotidase                           |
| G2583_0593 | CDS   | 612081 | 612560 | -                | ybaK              | hypothetical protein                                          |
| G2583_0594 | ncRNA | 612683 | 612765 | +                | sroB              | ncRNA                                                         |
| G2583_0595 | CDS   | 612764 | 613558 | -                | ybaP              | GumN family protein                                           |
| G2583_0596 | CDS   | 613642 | 614037 | +                | ybaQ              | Addiction module antidote protein, HigA family                |
| G2583_0597 | CDS   | 614252 | 616756 | -                | copA              | Copper-transporting P-type ATPase                             |
| G2583_0598 | CDS   | 617018 | 617950 | +                | ybaS              | Glutaminase 1                                                 |

| Locus_tag  | Type       | Start  | End    | +/- <sup>a</sup> | Gene <sup>b</sup> | Product                                                         |
|------------|------------|--------|--------|------------------|-------------------|-----------------------------------------------------------------|
| G2583_0599 | CDS        | 617953 | 619245 | +                | ybaT              | Amino acid permease family protein                              |
| G2583_0600 | CDS        | 619583 | 620938 | +                | -                 | Putative outer membrane export protein                          |
| G2583_0601 | CDS        | 621041 | 641818 | +                | -                 | hypothetical protein                                            |
| G2583_0602 | CDS        | 641822 | 643984 | +                | -                 | Putative cytoplasmic membrane export protein                    |
| G2583_0603 | CDS        | 643981 | 645156 | +                | -                 | Membrane spanning export protein                                |
| G2583_0604 | CDS        | 645153 | 645560 | +                | cueR              | DNA-binding transcriptional activator of copper-responsive      |
| G2583_0605 | CDS        | 645764 | 646186 | -                | -                 | hypothetical protein                                            |
| G2583_0606 | CDS        | 646271 | 647287 | -                | -                 | hypothetical protein                                            |
| G2583_0607 | CDS        | 647654 | 648016 | +                | -                 | hypothetical protein                                            |
| G2583_0608 | CDS        | 648195 | 648653 | -                | ybbJ              | Nodulation efficiency family protein                            |
| G2583_0609 | CDS        | 648650 | 649567 | -                | qmcA              | putative protease                                               |
| G2583_0610 | CDS        | 649713 | 650390 | +                | ybbL              | ABC transporter, ATP-binding protein                            |
| G2583_0611 | CDS        | 650350 | 651156 | +                | ybbM              | Putative metal resistance protein                               |
| G2583_0612 | CDS        | 651219 | 652109 | -                | ybbN              | putative thioredoxin-like protein                               |
| G2583_0613 | CDS        | 652134 | 652943 | -                | ybbO              | Oxidoreductase, short chain dehydrogenase/reductase family      |
| G2583_0614 | CDS        | 652933 | 653559 | -                | tesA              | Acyl-CoA thioesterase I                                         |
| G2583_0615 | CDS        | 653527 | 654213 | +                | ybbA              | Uncharacterized ABC transporter ATP-binding protein ybbA        |
| G2583_0616 | CDS        | 654210 | 656624 | +                | ybbP              | putative oxidoreductase                                         |
| G2583_0617 | pseudogene | 657054 | 661251 | +                | rhsD              | RHS Repeat family protein                                       |
| G2583_0618 | CDS        | 661232 | 661492 | +                | ybbD              | hypothetical protein                                            |
| G2583_0620 | CDS        | 661531 | 661680 | +                | -                 | hypothetical protein                                            |
| G2583_0621 | CDS        | 661675 | 661827 | -                | -                 | hypothetical protein                                            |
| G2583_0622 | CDS        | 662236 | 662643 | -                | ylbG              | hypothetical protein                                            |
| G2583_0623 | CDS        | 662723 | 663817 | -                | ybbB              | tRNA 2-selenouridine synthase                                   |
| G2583_0624 | CDS        | 663886 | 664812 | -                | allS              | DNA-binding transcriptional activator of the allD operon        |
| G2583_0625 | CDS        | 665042 | 665524 | +                | allA              | Ureidoglycolate hydrolase                                       |
| G2583_0626 | CDS        | 665602 | 666417 | +                | allR              | Putative regulator                                              |
| G2583_0627 | CDS        | 666507 | 668288 | +                | gcl               | Glyoxylate carboligase                                          |
| G2583_0628 | CDS        | 668301 | 669077 | +                | hyi               | Glyoxylate-induced protein                                      |
| G2583_0629 | CDS        | 669178 | 670056 | +                | glxR              | 2-hydroxy-3-oxopropionate reductase                             |
| G2583_0630 | CDS        | 670088 | 670366 | +                | ybbV              | hypothetical protein                                            |
| G2583_0631 | CDS        | 670225 | 671616 | +                | ybbW              | Cytosine/uracil/thiamine/allantoin permeases                    |
| G2583_0632 | CDS        | 671653 | 673014 | +                | allB              | Dihydroorotase and related cyclic amidohydrolases               |
| G2583_0633 | CDS        | 673065 | 674372 | +                | ybbY              | Putative purine permease ybbY                                   |
| G2583_0634 | CDS        | 674394 | 675539 | +                | glxK              | Glycerate kinase                                                |
| G2583_0635 | CDS        | 675767 | 676552 | -                | ylbA              | hypothetical protein                                            |
| G2583_0636 | CDS        | 676563 | 677798 | -                | allC              | Allantoate amidohydrolase                                       |
| G2583_0637 | CDS        | 677820 | 678869 | -                | allD              | Ureidoglycolate dehydrogenase                                   |
| G2583_0638 | CDS        | 679186 | 680853 | +                | fdrA              | Bacterial FdrA protein                                          |
| G2583_0639 | CDS        | 680863 | 682122 | +                | ylbE              | hypothetical protein                                            |
| G2583_0640 | CDS        | 682133 | 682948 | +                | ylbF              | putative carboxylase                                            |
| G2583_0641 | CDS        | 682945 | 683838 | +                | ybcF              | Carbamate kinase                                                |
| G2583_0642 | CDS        | 683977 | 685044 | -                | purK              | Phosphoribosylaminoimidazole carboxylase, ATPase subunit        |
| G2583_0643 | CDS        | 685041 | 685550 | -                | purE              | Phosphoribosylaminoimidazole carboxylase catalytic subunit      |
| G2583_0644 | CDS        | 685668 | 686390 | -                | lpxH              | UDP-2,3-diacetylglucosamine hydrolase                           |
| G2583_0645 | CDS        | 686393 | 686887 | -                | ppiB              | Peptidyl-prolyl cis-trans isomerase                             |
| G2583_0646 | CDS        | 687061 | 688446 | +                | cysS              | CysteinyI-tRNA synthetase                                       |
| G2583_0647 | CDS        | 688482 | 689003 | -                | ybcI              | hypothetical protein                                            |
| G2583_0648 | CDS        | 689111 | 689323 | -                | ybcJ              | hypothetical protein                                            |
| G2583_0649 | CDS        | 689325 | 690191 | -                | folD              | Bifunctional protein folD [Includes: Methylene tetrahydrofolate |
| G2583_0650 | CDS        | 690638 | 691213 | +                | sfmA              | Putative fimbrial-like protein                                  |
| G2583_0651 | CDS        | 691433 | 692125 | +                | sfmC              | Chaperone protein FimC-like protein                             |
| G2583_0652 | CDS        | 692156 | 694765 | +                | sfmD              | Outer membrane usher protein SfmD                               |
| G2583_0653 | CDS        | 694778 | 695785 | +                | sfmH              | Involved in fimbrial assembly precursor                         |
| G2583_0654 | CDS        | 695796 | 696311 | +                | sfmF              | Putative fimbrial protein                                       |
| G2583_0655 | CDS        | 696314 | 697009 | -                | fimZ              | Fimbrial Z protein                                              |
| G2583_0656 | tRNA       | 697188 | 697266 | +                | -                 | Arg tRNA                                                        |
| G2583_0657 | CDS        | 697281 | 698444 | -                | intD              | Prophage DLP12 integrase                                        |
| G2583_0658 | CDS        | 698643 | 698921 | -                | -                 | Hypothetical phage protein                                      |
| G2583_0659 | CDS        | 698969 | 699187 | -                | -                 | Hypothetical phage protein                                      |

| Locus_tag  | Type | Start  | End    | +/- <sup>a</sup> | Gene <sup>b</sup> | Product                                                |
|------------|------|--------|--------|------------------|-------------------|--------------------------------------------------------|
| G2583_0660 | CDS  | 699286 | 699567 | -                | -                 | Unknown protein encoded within prophage                |
| G2583_0661 | CDS  | 699578 | 699769 | -                | -                 | protein of unknown function DUF1382                    |
| G2583_0662 | CDS  | 699721 | 700047 | +                | -                 | hypothetical protein                                   |
| G2583_0663 | CDS  | 699921 | 700601 | -                | ybcC              | Putative exonuclease encoded by prophage CP-933K       |
| G2583_0664 | CDS  | 700598 | 701383 | -                | betW              | Bet protein                                            |
| G2583_0665 | CDS  | 701389 | 701685 | -                | gam               | Host-nuclease inhibitor protein gam                    |
| G2583_0666 | CDS  | 701761 | 701967 | -                | kil               | Prophage Kil protein                                   |
| G2583_0667 | CDS  | 702448 | 702825 | -                | -                 | Hypothetical phage associated protein                  |
| G2583_0668 | CDS  | 702803 | 703864 | -                | -                 | hypothetical protein                                   |
| G2583_0669 | CDS  | 703945 | 704559 | -                | -                 | Putative repressor protein                             |
| G2583_0670 | CDS  | 704739 | 704969 | +                | -                 | hypothetical protein                                   |
| G2583_0671 | CDS  | 705039 | 705578 | +                | -                 | hypothetical protein                                   |
| G2583_0672 | CDS  | 705575 | 706594 | +                | -                 | Phage replication protein O                            |
| G2583_0673 | CDS  | 706591 | 707292 | +                | -                 | replication protein P                                  |
| G2583_0674 | CDS  | 707289 | 707591 | +                | renD              | Ren protein                                            |
| G2583_0675 | CDS  | 707659 | 707991 | +                | emrE              | EmrE SMR transporter                                   |
| G2583_0676 | CDS  | 708248 | 709774 | +                | ybcK              | DLP12 prophage; predicted recombinase                  |
| G2583_0677 | CDS  | 710239 | 710790 | +                | ybcL              | Putative phosphatidylethanolamine-binding protein      |
| G2583_0678 | CDS  | 710800 | 711597 | +                | ybcM              | DLP12 prophage; predicted DNA-binding transcriptional  |
| G2583_0679 | CDS  | 711714 | 711815 | +                | ylcH              | hypothetical protein                                   |
| G2583_0680 | CDS  | 711812 | 712267 | +                | ybcN              | hypothetical protein                                   |
| G2583_0681 | CDS  | 712267 | 712437 | +                | ninE              | NinE protein                                           |
| G2583_0682 | CDS  | 712430 | 712720 | +                | ybcO              | hypothetical protein                                   |
| G2583_0683 | CDS  | 712717 | 713079 | +                | rusA              | Crossover junction endodeoxyribonuclease rusA          |
| G2583_0684 | CDS  | 713076 | 713216 | +                | ylcG              | hypothetical protein                                   |
| G2583_0685 | CDS  | 713302 | 713685 | +                | ybcQ              | Phage antitermination Q type 1 family                  |
| G2583_0686 | CDS  | 713874 | 714956 | -                | nmpC              | Outer membrane porin protein C                         |
| G2583_0687 | CDS  | 715501 | 715761 | +                | essD              | hypothetical protein                                   |
| G2583_0688 | CDS  | 715761 | 716258 | +                | ybcS              | Lysozyme                                               |
| G2583_0689 | CDS  | 716243 | 716716 | +                | rzpD              | Putative Rz endopeptidase from lambdoid prophage DLP12 |
| G2583_0690 | CDS  | 716748 | 717041 | -                | borD              | Lambdoid prophage DLP12 Bor-like protein               |
| G2583_0691 | CDS  | 717986 | 718531 | +                | nohB              | Bacteriophage DNA packaging protein                    |
| G2583_0692 | CDS  | 718506 | 720431 | +                | -                 | Bacteriophage tail assembly protein                    |
| G2583_0693 | CDS  | 720428 | 720634 | +                | -                 | Lambda prophage-derived head-to-tail joining protein W |
| G2583_0694 | CDS  | 720631 | 722232 | +                | -                 | Putative capsid structural protein of prophage         |
| G2583_0695 | CDS  | 722213 | 723532 | +                | -                 | Minor capsid protein C                                 |
| G2583_0696 | CDS  | 723536 | 723874 | +                | -                 | Putative head-DNA stabilization protein of prophage    |
| G2583_0697 | CDS  | 723903 | 724955 | +                | -                 | phage major capsid protein E                           |
| G2583_0698 | CDS  | 724958 | 725392 | +                | -                 | Putative DNA packaging protein of prophage             |
| G2583_0699 | CDS  | 725404 | 725757 | +                | -                 | Phage Head-Tail Attachment                             |
| G2583_0700 | CDS  | 725769 | 726347 | +                | -                 | prophage minor tail protein Z                          |
| G2583_0701 | CDS  | 726344 | 726739 | +                | -                 | Permeases of the major facilitator superfamily         |
| G2583_0702 | CDS  | 726717 | 727487 | +                | -                 | Putative tail component of prophage                    |
| G2583_0703 | CDS  | 727503 | 727925 | +                | -                 | phage minor tail protein G                             |
| G2583_0704 | CDS  | 727907 | 728341 | +                | -                 | Minor tail protein T                                   |
| G2583_0705 | CDS  | 728334 | 730913 | +                | -                 | Minor tail protein H                                   |
| G2583_0706 | CDS  | 730910 | 731239 | +                | -                 | Minor tail protein M                                   |
| G2583_0707 | CDS  | 731239 | 731937 | +                | -                 | Phage-related protein                                  |
| G2583_0708 | CDS  | 731943 | 732686 | +                | -                 | Putative tail fiber component K of prophage            |
| G2583_0709 | CDS  | 732584 | 733225 | +                | -                 | Putative tail component of prophage CP-933K            |
| G2583_0710 | CDS  | 733286 | 736699 | +                | -                 | Host specificity protein J                             |
| G2583_0711 | CDS  | 736769 | 737368 | +                | -                 | hypothetical protein                                   |
| G2583_0712 | CDS  | 737427 | 740261 | +                | ydfN              | PPE-repeat proteins                                    |
| G2583_0713 | CDS  | 740261 | 740845 | +                | ynaC              | Tail fiber assembly protein                            |
| G2583_0714 | CDS  | 740900 | 741568 | -                | ybcY              | unknown protein encoded by prophage CP-933X            |
| G2583_0715 | CDS  | 741625 | 741930 | +                | ylcE              | tail fiber assembly protein                            |
| G2583_0716 | CDS  | 742114 | 743598 | -                | -                 | Putative protease encoded within prophage CP-933X      |
| G2583_0717 | CDS  | 743785 | 744738 | -                | ompT              | Protease VII                                           |
| G2583_0718 | CDS  | 745237 | 745821 | +                | -                 | Helix-turn-helix domain protein                        |
| G2583_0719 | CDS  | 745846 | 746283 | -                | yjaB              | Hypothetical acetyltransferase YjaB                    |

| Locus_tag  | Type       | Start  | End    | +/- <sup>a</sup> | Gene <sup>b</sup> | Product                                                           |
|------------|------------|--------|--------|------------------|-------------------|-------------------------------------------------------------------|
| G2583_0720 | CDS        | 746726 | 747487 | -                | envY              | envelope protein; thermoregulation of porin biosynthesis          |
| G2583_0721 | CDS        | 747670 | 748560 | -                | ybcH              | hypothetical protein                                              |
| G2583_0722 | CDS        | 748561 | 751533 | -                | nfrA              | Bacteriophage N4 adsorption protein A                             |
| G2583_0723 | CDS        | 751520 | 753757 | -                | nfrB              | Bacteriophage N4 adsorption protein B                             |
| G2583_0724 | CDS        | 754023 | 755159 | -                | yhhI              | ISEc4, transposase                                                |
| G2583_0725 | CDS        | 755374 | 755595 | -                | -                 | hypothetical protein                                              |
| G2583_0726 | CDS        | 755622 | 756956 | -                | -                 | YD repeat                                                         |
| G2583_0727 | CDS        | 757125 | 757532 | -                | -                 | hypothetical protein                                              |
| G2583_0728 | CDS        | 757550 | 762400 | -                | rhlS              | Rhs core protein with extension                                   |
| G2583_0729 | pseudogene | 762420 | 762881 | -                | -                 | conserved hypothetical protein                                    |
| G2583_0730 | CDS        | 762909 | 764810 | -                | -                 | Type VI secretion system Vgr family protein                       |
| G2583_0731 | CDS        | 765404 | 766852 | -                | cusS              | Sensor kinase cusS                                                |
| G2583_0732 | CDS        | 766842 | 767525 | -                | cusR              | DNA-binding response regulator in two-component regulatory        |
| G2583_0733 | CDS        | 767682 | 769064 | +                | cusC              | Cation efflux system protein cusC precursor                       |
| G2583_0734 | CDS        | 769088 | 769420 | +                | cusF              | Cation efflux system protein cusF precursor                       |
| G2583_0735 | CDS        | 769436 | 770659 | +                | cusB              | Cation efflux system protein CusB                                 |
| G2583_0736 | CDS        | 770671 | 773814 | +                | cusA              | Cation efflux system protein cusA                                 |
| G2583_0737 | CDS        | 773916 | 775292 | +                | pheP              | Phenylalanine-specific permease                                   |
| G2583_0738 | CDS        | 775360 | 776607 | -                | ybdG              | Transporter, small conductance mechanosensitive ion channel       |
| G2583_0739 | CDS        | 776715 | 777368 | -                | nfsB              | Oxygen-insensitive NAD(P)H nitroreductase                         |
| G2583_0740 | CDS        | 777462 | 777830 | -                | ybdF              | hypothetical protein                                              |
| G2583_0741 | CDS        | 777895 | 778143 | -                | ybdJ              | putative membrane protein YbdJ                                    |
| G2583_0742 | CDS        | 778209 | 779327 | -                | ybdK              | Carboxylate-amine ligase ybdK                                     |
| G2583_0743 | CDS        | 779622 | 779918 | +                | mokC2             | Hok/Gef family protein                                            |
| G2583_0744 | CDS        | 780170 | 780421 | +                | hokE              | Hok/Gef family protein                                            |
| G2583_0745 | CDS        | 780543 | 781313 | -                | entD              | 4'-phosphopantetheinyl transferase entD                           |
| G2583_0746 | CDS        | 781338 | 783578 | -                | fepA              | Ferrienterobactin receptor                                        |
| G2583_0747 | CDS        | 783821 | 785023 | +                | fes               | Enterochelin esterase                                             |
| G2583_0748 | CDS        | 785026 | 785244 | +                | ybdZ              | MbtH-like protein                                                 |
| G2583_0749 | CDS        | 785241 | 789122 | +                | entF              | Enterobactin synthetase component F                               |
| G2583_0750 | CDS        | 789338 | 790471 | +                | fepE              | Ferric enterobactin transport protein fepE                        |
| G2583_0751 | CDS        | 790468 | 791283 | -                | fepC              | Ferric enterobactin transport ATP-binding protein                 |
| G2583_0752 | CDS        | 791280 | 792272 | -                | fepG              | Ferric enterobactin transport protein                             |
| G2583_0753 | CDS        | 792269 | 793273 | -                | fepD              | ABC-type Fe <sup>3+</sup> -siderophore transport system, permease |
| G2583_0754 | CDS        | 793384 | 794634 | +                | entS              | Enterobactin exporter entS                                        |
| G2583_0755 | CDS        | 794638 | 795594 | -                | fepB              | Ferrienterobactin ABC transporter, ferrienterobactin-binding      |
| G2583_0756 | CDS        | 795783 | 796958 | +                | entC              | Isochorismate synthase entC                                       |
| G2583_0757 | CDS        | 796968 | 798578 | +                | entE              | Enterobactin synthetase component E (Enterochelin synthase        |
| G2583_0758 | CDS        | 798592 | 799449 | +                | entB              | Isochorismatase                                                   |
| G2583_0759 | CDS        | 799449 | 800195 | +                | entA              | 2,3-dihydroxybenzoate-2,3-dehydrogenase                           |
| G2583_0760 | CDS        | 800198 | 800611 | +                | ybdB              | Esterase ybdB                                                     |
| G2583_0761 | CDS        | 800792 | 802897 | +                | cstA              | Carbon starvation protein A                                       |
| G2583_0762 | CDS        | 803079 | 803276 | +                | ybdD              | hypothetical protein                                              |
| G2583_0763 | CDS        | 803286 | 804374 | -                | ybdH              | Alcohol dehydrogenase, iron-containing                            |
| G2583_0764 | CDS        | 804483 | 805643 | +                | ybdL              | Aminotransferase, classes I and II                                |
| G2583_0765 | CDS        | 805644 | 806273 | -                | ybdM              | Immunoglobulin-binding regulator family protein                   |
| G2583_0766 | CDS        | 806246 | 807466 | -                | ybdN              | Phosphoadenosine phosphosulfate reductase family protein          |
| G2583_0767 | CDS        | 807613 | 808515 | -                | ybdO              | putative transcriptional regulator LYSR-type                      |
| G2583_0768 | CDS        | 808725 | 809525 | -                | dsbG              | Thiol:disulfide interchange protein DsbG                          |
| G2583_0769 | CDS        | 809843 | 810406 | +                | ahpC              | Alkyl hydroperoxide reductase subunit C                           |
| G2583_0770 | CDS        | 810505 | 812100 | +                | ahpF              | Alkyl hydroperoxide reductase subunit F                           |
| G2583_0771 | CDS        | 812221 | 812649 | -                | uspG              | Universal stress protein UspG                                     |
| G2583_0772 | CDS        | 812870 | 814108 | +                | ybdR              | Oxidoreductase, zinc-binding dehydrogenase family                 |
| G2583_0773 | CDS        | 814112 | 814300 | -                | -                 | hypothetical protein                                              |
| G2583_0774 | CDS        | 814339 | 814749 | -                | rnk               | Regulator of nucleoside diphosphate kinase                        |
| G2583_0775 | CDS        | 814979 | 815785 | -                | rna               | Ribonuclease I                                                    |
| G2583_0776 | CDS        | 815899 | 817362 | -                | citT              | Citrate carrier                                                   |
| G2583_0777 | CDS        | 817413 | 818291 | -                | citG              | 2-(5"-triphosphoribosyl)-3'-dephosphocoenzyme-A synthase          |
| G2583_0778 | CDS        | 818266 | 818817 | -                | citX              | Apo-citrate lyase phosphoribosyl-dephospho-CoA transferase        |
| G2583_0779 | CDS        | 818821 | 820353 | -                | citF              | Citrate lyase, alpha subunit                                      |

| Locus_tag  | Type       | Start  | End    | +/- <sup>a</sup> | Gene <sup>b</sup> | Product                                                        |
|------------|------------|--------|--------|------------------|-------------------|----------------------------------------------------------------|
| G2583_0780 | CDS        | 820364 | 821287 | -                | citE              | Citrate lyase beta chain                                       |
| G2583_0781 | CDS        | 821269 | 821565 | -                | citD              | Citrate lyase acyl carrier protein                             |
| G2583_0782 | CDS        | 821580 | 822725 | -                | citC              | Citrate lyase synthetase                                       |
| G2583_0783 | CDS        | 823018 | 824676 | +                | dpiB              | Sensor histidine kinase DpiB                                   |
| G2583_0784 | pseudogene | 824645 | 825324 | +                | dpiA              | transcriptional regulatory protein DpiA                        |
| G2583_0785 | CDS        | 825365 | 826750 | -                | dcuC              | C4-dicarboxylate transporter                                   |
| G2583_0786 | CDS        | 827339 | 827899 | +                | pagP              | Antimicrobial peptide resistance and lipid A acylation protein |
| G2583_0787 | CDS        | 828074 | 828283 | +                | cspE              | hypothetical protein                                           |
| G2583_0788 | CDS        | 828337 | 828720 | -                | crcB              | camphor resistance protein CrcB                                |
| G2583_0789 | CDS        | 828813 | 829601 | +                | ybeM              | UPF0012 hydrolase ybeM                                         |
| G2583_0790 | CDS        | 829730 | 829933 | +                | tatE              | Sec-independent protein translocase protein tatE               |
| G2583_0791 | CDS        | 830034 | 830999 | -                | lipA              | Lipoyl synthase                                                |
| G2583_0792 | CDS        | 831208 | 832161 | -                | ybeF              | putative DNA-binding transcriptional regulator                 |
| G2583_0793 | CDS        | 832421 | 833062 | -                | lipB              | Octanoyltransferase                                            |
| G2583_0794 | CDS        | 833163 | 833426 | -                | ybeD              | Putative cytoplasmic protein                                   |
| G2583_0795 | CDS        | 833536 | 834747 | -                | dacA              | D-alanyl-D-alanine carboxypeptidase dacA precursor             |
| G2583_0796 | CDS        | 834887 | 835975 | -                | rlpA              | Rare lipoprotein A precursor                                   |
| G2583_0797 | CDS        | 835986 | 837098 | -                | mrdB              | rod shape-determining protein RodA                             |
| G2583_0798 | CDS        | 837101 | 839002 | -                | mrdA              | Penicillin-binding protein 2                                   |
| G2583_0799 | CDS        | 839033 | 839500 | -                | ybeA              | UPF0247 protein ybeA                                           |
| G2583_0800 | CDS        | 839504 | 839821 | -                | ybeB              | hypothetical protein                                           |
| G2583_0801 | CDS        | 840081 | 840692 | -                | cobC              | Alpha-ribazole phosphatase                                     |
| G2583_0802 | CDS        | 840716 | 841357 | -                | nadD              | Nicotinate-nucleotide adenyllyltransferase                     |
| G2583_0803 | CDS        | 841359 | 842390 | -                | holA              | DNA polymerase III, delta subunit                              |
| G2583_0804 | CDS        | 842390 | 842971 | -                | rlpB              | LPS-assembly lipoprotein rlpB precursor                        |
| G2583_0805 | CDS        | 842986 | 845568 | -                | leuS              | Leucyl-tRNA synthetase                                         |
| G2583_0806 | CDS        | 845804 | 846286 | +                | ybeL              | hypothetical protein                                           |
| G2583_0807 | CDS        | 846356 | 847333 | +                | ybeQ              | FOG: TPR repeat, SEL1 subfamily                                |
| G2583_0808 | CDS        | 847498 | 848205 | -                | ybeR              | hypothetical protein                                           |
| G2583_0809 | CDS        | 848202 | 849629 | +                | djlB              | DnaJ domain protein                                            |
| G2583_0810 | CDS        | 849639 | 850193 | -                | ybeT              | Sel1 domain protein repeat-containing protein                  |
| G2583_0811 | CDS        | 850295 | 851002 | +                | ybeU              | putative tRNA ligase                                           |
| G2583_0812 | pseudogene | 851062 | 852450 | +                | ybeV              | DnaJ domain protein                                            |
| G2583_0813 | CDS        | 852510 | 854180 | -                | hscC              | DnaK family protein HscC                                       |
| G2583_0814 | CDS        | 854264 | 855199 | -                | rihA              | Pyrimidine-specific ribonucleoside hydrolase rihA              |
| G2583_0815 | CDS        | 855317 | 856042 | -                | gltL              | Glutamate/aspartate transport ATP-binding protein gltL         |
| G2583_0816 | CDS        | 856042 | 856716 | -                | gltK              | Glutamate/aspartate transport system permease protein gltK     |
| G2583_0817 | CDS        | 856716 | 857456 | -                | gltJ              | Glutamate/aspartate ABC transporter, permease protein GltJ     |
| G2583_0818 | ncRNA      | 857468 | 857630 | -                | sroC              | ncRNA                                                          |
| G2583_0819 | CDS        | 857626 | 858609 | -                | gltI              | Glutamate/aspartate periplasmic binding protein                |
| G2583_0820 | CDS        | 858931 | 860469 | -                | Int               | Apolipoprotein N-acyltransferase                               |
| G2583_0821 | CDS        | 860494 | 861372 | -                | ybeX              | Magnesium and cobalt efflux protein corC                       |
| G2583_0822 | CDS        | 861462 | 861929 | -                | ybeY              | conserved hypothetical protein                                 |
| G2583_0823 | CDS        | 861926 | 863005 | -                | ybeZ              | PhoH family protein                                            |
| G2583_0824 | CDS        | 863119 | 864543 | -                | miaB              | UPF0004 protein yleA                                           |
| G2583_0825 | CDS        | 864689 | 865864 | +                | ubiF              | 2-octaprenyl-3-methyl-6-methoxy-1,4-benzoquinol hydroxylase    |
| G2583_0827 | tRNA       | 866052 | 866128 | -                | -                 | Gln tRNA                                                       |
| G2583_0828 | tRNA       | 866164 | 866240 | -                | -                 | Gln tRNA                                                       |
| G2583_0829 | tRNA       | 866287 | 866365 | -                | -                 | Met tRNA                                                       |
| G2583_0831 | tRNA       | 866379 | 866455 | -                | -                 | Gln tRNA                                                       |
| G2583_0832 | tRNA       | 866489 | 866563 | -                | -                 | Gln tRNA                                                       |
| G2583_0833 | tRNA       | 866586 | 866672 | -                | -                 | Leu tRNA                                                       |
| G2583_0834 | tRNA       | 866681 | 866759 | -                | -                 | Met tRNA                                                       |
| G2583_0835 | CDS        | 867138 | 868802 | -                | asnB              | Asparagine synthase                                            |
| G2583_0836 | CDS        | 869059 | 869811 | -                | nagD              | UMP phosphatase                                                |
| G2583_0837 | CDS        | 869859 | 871079 | -                | nagC              | N-acetylglucosamine repressor                                  |
| G2583_0838 | CDS        | 871088 | 872236 | -                | nagA              | N-acetylglucosamine-6-phosphate deacetylase                    |
| G2583_0839 | CDS        | 872296 | 873096 | -                | nagB              | Glucosamine-6-phosphate deaminase                              |
| G2583_0840 | CDS        | 873429 | 875375 | +                | nagE              | PTS system, N-acetylglucosamine-specific IICBA component       |
| G2583_0841 | CDS        | 875578 | 877242 | +                | glnS              | Glutaminyl-tRNA synthetase                                     |

| Locus_tag  | Type       | Start  | End    | +/- <sup>a</sup> | Gene <sup>b</sup> | Product                                                      |
|------------|------------|--------|--------|------------------|-------------------|--------------------------------------------------------------|
| G2583_0842 | CDS        | 877821 | 879227 | +                | ybfM              | Outer membrane porin, OprD family                            |
| G2583_0843 | CDS        | 879277 | 879603 | +                | ybfN              | hypothetical protein                                         |
| G2583_0844 | CDS        | 879687 | 880133 | -                | fur               | Ferric uptake regulation protein                             |
| G2583_0845 | CDS        | 880422 | 880952 | -                | fldA              | Flavodoxin                                                   |
| G2583_0846 | CDS        | 881092 | 881454 | -                | ybfE              | CopG domain protein DNA-binding domain protein               |
| G2583_0847 | CDS        | 881525 | 882289 | -                | ybfF              | Esterase YbfF                                                |
| G2583_0848 | CDS        | 882474 | 883019 | +                | seqA              | Negative modulator of initiation of replication              |
| G2583_0849 | CDS        | 883045 | 884685 | +                | pgm               | Phosphoglucomutase                                           |
| G2583_0850 | CDS        | 884742 | 886061 | -                | potE              | Putrescine-ornithine antiporter                              |
| G2583_0851 | CDS        | 886058 | 888265 | -                | speF              | Ornithine decarboxylase, inducible                           |
| G2583_0852 | CDS        | 888946 | 889623 | -                | kdpE              | KDP operon transcriptional regulatory protein KdpE           |
| G2583_0853 | CDS        | 889620 | 892304 | -                | kdpD              | sensor protein KdpD                                          |
| G2583_0854 | CDS        | 892297 | 892869 | -                | kdpC              | Potassium-transporting ATPase C chain                        |
| G2583_0855 | CDS        | 892878 | 894926 | -                | kdpB              | Potassium-transporting ATPase B chain                        |
| G2583_0856 | CDS        | 894949 | 896622 | -                | kdpA              | Potassium-transporting ATPase A chain                        |
| G2583_0857 | CDS        | 896622 | 896825 | -                | kdpF              | K <sup>+</sup> -transporting ATPase, F subunit               |
| G2583_0858 | CDS        | 897024 | 897230 | +                | ybfA              | hypothetical protein                                         |
| G2583_0859 | CDS        | 897473 | 901672 | +                | rhcC              | rhcC                                                         |
| G2583_0860 | CDS        | 901669 | 902238 | +                | ybfC              | hypothetical protein                                         |
| G2583_0861 | CDS        | 903826 | 904962 | +                | yhhI              | Transposase IS4 family protein                               |
| G2583_0862 | CDS        | 905111 | 905620 | +                | ybgA              | hypothetical protein                                         |
| G2583_0863 | CDS        | 905617 | 907035 | +                | phr               | Deoxyribodipyrimidine photolyase                             |
| G2583_0864 | CDS        | 907185 | 908666 | -                | ybgH              | Amino acid/peptide transporter                               |
| G2583_0865 | CDS        | 908937 | 909680 | +                | ybgI              | NIF3 family protein                                          |
| G2583_0866 | CDS        | 909703 | 910359 | +                | ybgJ              | putative carboxylase                                         |
| G2583_0867 | CDS        | 910353 | 911285 | +                | ybgK              | Putative carboxylase                                         |
| G2583_0868 | CDS        | 911275 | 912009 | +                | ybgL              | UPF0271 protein ybgL                                         |
| G2583_0869 | CDS        | 912045 | 912836 | +                | nei               | Endonuclease VIII (DNA glycosylase/AP lyase Nei) (DNA-       |
| G2583_0870 | CDS        | 912833 | 913924 | -                | abrB              | Putative transport protein                                   |
| G2583_0871 | CDS        | 914028 | 915089 | -                | ybgO              | hypothetical protein                                         |
| G2583_0872 | CDS        | 915086 | 915817 | -                | ybgP              | Periplasmic pilus chaperone family protein                   |
| G2583_0873 | CDS        | 915832 | 918282 | -                | ybgQ              | outer membrane protein                                       |
| G2583_0874 | CDS        | 918341 | 918922 | -                | ybgD              | Putative fimbrial-like protein                               |
| G2583_0875 | CDS        | 919294 | 920577 | -                | gltA              | Citrate (Si)-synthase                                        |
| G2583_0876 | CDS        | 921286 | 921675 | +                | sdhC              | Succinate dehydrogenase cytochrome b-556 subunit             |
| G2583_0877 | CDS        | 921669 | 922016 | +                | sdhD              | Succinate dehydrogenase hydrophobic membrane anchor          |
| G2583_0878 | CDS        | 922016 | 923782 | +                | sdhA              | Succinate dehydrogenase flavoprotein subunit                 |
| G2583_0879 | CDS        | 923798 | 924514 | +                | sdhB              | Succinate dehydrogenase, iron-sulfur subunit                 |
| G2583_0880 | CDS        | 924573 | 924833 | +                | -                 | hypothetical protein                                         |
| G2583_0881 | CDS        | 924815 | 927616 | +                | sucA              | 2-oxoglutarate dehydrogenase E1 component                    |
| G2583_0882 | CDS        | 927631 | 928848 | +                | sucB              | Dihydrolypoylysine-residue succinyltransferase, E2 component |
| G2583_0883 | CDS        | 928942 | 930108 | +                | sucC              | Succinyl-CoA ligase [ADP-forming] subunit beta               |
| G2583_0884 | CDS        | 930108 | 930977 | +                | sucD              | Succinyl-CoA ligase [ADP-forming] subunit alpha              |
| G2583_0885 | CDS        | 931227 | 931373 | +                | -                 | conserved domain protein                                     |
| G2583_0886 | CDS        | 931644 | 932549 | +                | -                 | putative LysR-like transcriptional regulator                 |
| G2583_0887 | CDS        | 932583 | 933083 | -                | cobO              | Cob(I)yrinic acid a,c-diamide adenosyltransferase            |
| G2583_0888 | CDS        | 933194 | 934846 | -                | fumA              | Hydro-lyase, Fe-S type, tartrate/fumarate family             |
| G2583_0889 | CDS        | 934954 | 936174 | -                | -                 | Transporter, dicarboxylate/amino acid:cation family          |
| G2583_0890 | CDS        | 936335 | 936652 | -                | -                 | hypothetical protein                                         |
| G2583_0891 | CDS        | 936649 | 938019 | -                | -                 | hypothetical protein                                         |
| G2583_0892 | CDS        | 938023 | 939264 | -                | -                 | Putative methylaspartate ammonia-lyase                       |
| G2583_0893 | CDS        | 939264 | 940709 | -                | mutE              | Methylaspartate mutase, E subunit                            |
| G2583_0894 | CDS        | 940728 | 942116 | -                | -                 | Putative glutamate mutase mutL                               |
| G2583_0895 | CDS        | 942116 | 942628 | -                | mamA              | Methylaspartate mutase S chain                               |
| G2583_0896 | CDS        | 942752 | 942919 | -                | -                 | hypothetical protein                                         |
| G2583_0897 | CDS        | 943113 | 943535 | -                | -                 | hypothetical protein                                         |
| G2583_0898 | pseudogene | 943617 | 944560 | -                | -                 | hypothetical protein                                         |
| G2583_0899 | CDS        | 945363 | 946934 | +                | cydA              | Cytochrome d ubiquinol oxidase subunit 1                     |
| G2583_0900 | CDS        | 946950 | 948089 | +                | cydB              | Cytochrome d ubiquinol oxidase subunit 2                     |
| G2583_0901 | CDS        | 948104 | 948217 | +                | ybgT              | hypothetical protein                                         |

| Locus_tag  | Type | Start  | End    | +/- <sup>a</sup> | Gene <sup>b</sup> | Product                                                    |
|------------|------|--------|--------|------------------|-------------------|------------------------------------------------------------|
| G2583_0902 | CDS  | 948217 | 948510 | +                | ybgE              | hypothetical protein                                       |
| G2583_0903 | CDS  | 948660 | 949064 | +                | ybgC              | Putative esterase YbgC                                     |
| G2583_0904 | CDS  | 949061 | 949753 | +                | tolQ              | Inner membrane protein                                     |
| G2583_0905 | CDS  | 949757 | 950185 | +                | tolR              | hypothetical protein                                       |
| G2583_0906 | CDS  | 950250 | 951515 | +                | tolA              | TolA colicin import membrane protein                       |
| G2583_0907 | CDS  | 951645 | 952940 | +                | tolB              | Protein tolB precursor                                     |
| G2583_0908 | CDS  | 952975 | 953496 | +                | pal               | Peptidoglycan-associated lipoprotein precursor             |
| G2583_0909 | CDS  | 953506 | 954297 | +                | ybgF              | Tol-pal system protein YbgF                                |
| G2583_0910 | tRNA | 954461 | 954538 | +                | -                 | Lys tRNA                                                   |
| G2583_0911 | tRNA | 954573 | 954648 | +                | -                 | Val tRNA                                                   |
| G2583_0912 | tRNA | 954651 | 954726 | +                | -                 | Lys tRNA                                                   |
| G2583_0913 | tRNA | 954778 | 954853 | +                | -                 | Val tRNA                                                   |
| G2583_0914 | tRNA | 954857 | 954932 | +                | -                 | Lys tRNA                                                   |
| G2583_0914 | tRNA | 955079 | 955154 | +                | -                 | Lys tRNA                                                   |
| G2583_5266 | tRNA | 955188 | 955263 | +                | -                 | Lys tRNA                                                   |
| G2583_0916 | CDS  | 955541 | 956584 | +                | nadA              | Quinolate synthetase A                                     |
| G2583_0917 | CDS  | 956622 | 957341 | +                | pnuC              | Nicotinamide mononucleotide transporter PnuC               |
| G2583_0918 | CDS  | 957338 | 958279 | -                | zitB              | Zinc transporter zitB                                      |
| G2583_0919 | CDS  | 958393 | 958773 | -                | ybgS              | hypothetical protein                                       |
| G2583_0920 | CDS  | 959090 | 960142 | +                | aroG              | Phospho-2-dehydro-3-deoxyheptonate aldolase, Phe-sensitive |
| G2583_0921 | CDS  | 960308 | 961060 | -                | gpmA              | 2,3-bisphosphoglycerate-dependent phosphoglycerate mutase  |
| G2583_0922 | CDS  | 961262 | 962302 | -                | galM              | Galactose mutarotase                                       |
| G2583_0923 | CDS  | 962296 | 963444 | -                | galK              | Galactokinase                                              |
| G2583_0924 | CDS  | 963448 | 964494 | -                | galT              | Galactose-1-phosphate uridylyltransferase                  |
| G2583_0925 | CDS  | 964504 | 965532 | -                | galE              | UDP-galactose-4-epimerase                                  |
| G2583_0926 | CDS  | 965782 | 967254 | -                | modF              | ABC transporter, ATP-binding protein                       |
| G2583_0927 | CDS  | 967322 | 968110 | -                | modE              | transcriptional regulator ModE                             |
| G2583_0928 | CDS  | 968239 | 968388 | +                | ybhT              | hypothetical protein                                       |
| G2583_0929 | CDS  | 968555 | 969328 | +                | modA              | Molybdate ABC transporter, periplasmic molybdate-binding   |
| G2583_0930 | CDS  | 969328 | 970017 | +                | modB              | ABC-type molybdate transport system, permease component    |
| G2583_0931 | CDS  | 970020 | 971078 | +                | modC              | Molybdenum import ATP-binding protein modC                 |
| G2583_0932 | CDS  | 971079 | 971999 | -                | ybhA              | Phosphatase YbhA                                           |
| G2583_0933 | CDS  | 972052 | 973047 | +                | pgl               | 6-phosphogluconolactonase                                  |
| G2583_0934 | CDS  | 973088 | 974104 | -                | ybhD              | putative transcriptional regulator LYSR-type               |
| G2583_0935 | CDS  | 974225 | 975277 | +                | ybhH              | hypothetical protein                                       |
| G2583_0936 | CDS  | 975353 | 976786 | +                | ybhI              | Anion transporter                                          |
| G2583_0937 | CDS  | 976969 | 979230 | +                | ybhJ              | aconitase family protein                                   |
| G2583_0938 | CDS  | 979371 | 980654 | -                | ybhC              | Pectinesterase                                             |
| G2583_0939 | CDS  | 980789 | 981859 | -                | intE              | Phage integrase family                                     |
| G2583_0940 | CDS  | 981837 | 982055 | -                | -                 | Excisionase                                                |
| G2583_0941 | CDS  | 982095 | 982262 | -                | -                 | unknown protein encoded by prophage CP-933K                |
| G2583_0942 | CDS  | 982505 | 983107 | +                | -                 | unknown protein encoded by prophage CP-933K                |
| G2583_0943 | CDS  | 983318 | 983539 | -                | -                 | hypothetical C4-type zinc finger protein TraR-family       |
| G2583_0944 | CDS  | 983638 | 983919 | -                | -                 | hypothetical protein                                       |
| G2583_0945 | CDS  | 983930 | 984121 | -                | -                 | unknown protein encoded by prophage CP-933K                |
| G2583_0946 | CDS  | 984273 | 984953 | -                | -                 | Exonuclease                                                |
| G2583_0947 | CDS  | 984950 | 985693 | -                | bet               | Bacteriophage recombination protein                        |
| G2583_0948 | CDS  | 985742 | 986038 | -                | gamW              | Gam protein                                                |
| G2583_0949 | CDS  | 986224 | 986460 | -                | CIII              | antitermination protein                                    |
| G2583_0950 | CDS  | 986461 | 986829 | -                | -                 | Lambda prophage-derived protein ea10                       |
| G2583_0951 | CDS  | 987025 | 987474 | -                | -                 | Gene 34 protein                                            |
| G2583_0952 | CDS  | 987759 | 988103 | -                | -                 | N protein                                                  |
| G2583_0953 | CDS  | 988760 | 989056 | -                | -                 | Hypothetical protein                                       |
| G2583_0954 | CDS  | 989229 | 989882 | -                | -                 | CI protein                                                 |
| G2583_0955 | CDS  | 989930 | 990214 | +                | CRO               | hypothetical protein                                       |
| G2583_0956 | CDS  | 990356 | 990655 | +                | -                 | regulatory protein CII                                     |
| G2583_0957 | CDS  | 990688 | 991587 | +                | -                 | hypothetical protein                                       |
| G2583_0958 | CDS  | 991584 | 992285 | +                | -                 | putative replication protein P of bacteriophage BP-933W    |
| G2583_0959 | CDS  | 992282 | 992572 | +                | -                 | Ren protein                                                |
| G2583_0960 | CDS  | 992646 | 993086 | +                | ninB              | Unknown protein encoded within prophage                    |



| Locus_tag  | Type       | Start   | End     | +/- <sup>a</sup> | Gene <sup>b</sup> | Product                                                |
|------------|------------|---------|---------|------------------|-------------------|--------------------------------------------------------|
| G2583_0961 | CDS        | 993023  | 993265  | +                | ninE              | NinE protein                                           |
| G2583_0962 | CDS        | 993220  | 993432  | +                | NinF              | NinF protein                                           |
| G2583_0963 | CDS        | 993422  | 994045  | +                | NinG              | NinG protein                                           |
| G2583_0964 | CDS        | 994042  | 994707  | +                | -                 | Serine/threonine-protein phosphatase 1                 |
| G2583_0965 | CDS        | 994919  | 995878  | -                | -                 | Putative outer membrane protein                        |
| G2583_0966 | CDS        | 996353  | 997042  | +                | -                 | Putative antiterminator Q protein of prophage CP-933K  |
| G2583_0967 | CDS        | 997213  | 997971  | +                | -                 | unknown protein encoded by prophage CP-933K            |
| G2583_0968 | CDS        | 998057  | 998215  | +                | -                 | unknown protein encoded by prophage CP-933K            |
| G2583_0969 | CDS        | 998792  | 999052  | +                | -                 | Putative holin protein                                 |
| G2583_0970 | CDS        | 999052  | 999549  | +                | ybcS              | putative lysozyme protein R of prophage CP-933K        |
| G2583_0971 | CDS        | 999546  | 1000013 | +                | -                 | Bacteriophage lysis protein                            |
| G2583_0972 | CDS        | 1000001 | 1000153 | +                | -                 | hypothetical protein                                   |
| G2583_0973 | CDS        | 1000449 | 1000838 | +                | -                 | hypothetical protein                                   |
| G2583_0974 | CDS        | 1000828 | 1001319 | +                | -                 | unknown protein encoded by prophage CP-933K            |
| G2583_0975 | CDS        | 1001319 | 1003421 | +                | -                 | Phage terminase large subunit                          |
| G2583_0976 | CDS        | 1003418 | 1003630 | +                | -                 | hypothetical protein                                   |
| G2583_0977 | CDS        | 1003558 | 1005138 | +                | -                 | Putative capsid protein                                |
| G2583_0978 | pseudogene | 1004987 | 1007110 | +                | clpP              | Clp protease domain protein                            |
| G2583_0979 | CDS        | 1007152 | 1007520 | +                | -                 | hypothetical protein                                   |
| G2583_0980 | CDS        | 1007513 | 1007788 | +                | -                 | unknown protein encoded by prophage CP-933K            |
| G2583_0981 | CDS        | 1007800 | 1008378 | +                | -                 | prophage minor tail protein Z                          |
| G2583_0982 | CDS        | 1008375 | 1008776 | +                | -                 | putative tail component of prophage CP-933K            |
| G2583_0983 | CDS        | 1008781 | 1009530 | +                | -                 | Putative tail component of prophage CP-933K            |
| G2583_0984 | CDS        | 1009579 | 1009977 | +                | -                 | ATPase components of ABC transporters with duplicated  |
| G2583_0985 | CDS        | 1009986 | 1010315 | +                | -                 | Putative tail component of prophage                    |
| G2583_0986 | CDS        | 1010287 | 1013352 | +                | -                 | Putative tail component of prophage CP-933K            |
| G2583_0987 | CDS        | 1013352 | 1013681 | +                | -                 | putative minor tail protein                            |
| G2583_0988 | CDS        | 1013691 | 1014389 | +                | -                 | putative minor tail protein                            |
| G2583_0989 | CDS        | 1014386 | 1015138 | +                | -                 | Putative tail fiber component K of prophage            |
| G2583_0990 | CDS        | 1015036 | 1015683 | +                | -                 | Putative tail component of prophage CP-933K            |
| G2583_0991 | CDS        | 1015744 | 1019157 | +                | -                 | Host specificity protein J                             |
| G2583_0992 | CDS        | 1019227 | 1019826 | +                | -                 | Enterobacterial Ail/Lom family protein                 |
| G2583_0993 | CDS        | 1019885 | 1021204 | +                | -                 | hypothetical protein                                   |
| G2583_0994 | CDS        | 1021167 | 1021475 | +                | -                 | putative prophage tail fibre C-terminus family protein |
| G2583_0995 | CDS        | 1021652 | 1022632 | +                | nleB              | NleB                                                   |
| G2583_0996 | CDS        | 1022693 | 1023685 | +                | nleC              | Non-LEE encoded type III effector C                    |
| G2583_0997 | CDS        | 1024296 | 1024343 | +                | -                 | hypothetical protein                                   |
| G2583_0998 | CDS        | 1024512 | 1025393 | +                | nleH              | non-LEE-encoded type III effector H                    |
| G2583_0999 | CDS        | 1025428 | 1025562 | +                | -                 | hypothetical protein                                   |
| G2583_1000 | CDS        | 1025624 | 1026322 | +                | nleD              | hypothetical protein                                   |
| G2583_1001 | CDS        | 1026829 | 1027305 | -                | ybhB              | UPF0098 protein ybhB                                   |
| G2583_1002 | CDS        | 1027364 | 1028653 | -                | bioA              | Adenosylmethionine-8-amino-7-oxononanoate transaminase |
| G2583_1003 | CDS        | 1028740 | 1029780 | +                | bioB              | Biotin synthase                                        |
| G2583_1004 | CDS        | 1029777 | 1030931 | +                | bioF              | 8-amino-7-oxononanoate synthase                        |
| G2583_1005 | CDS        | 1030918 | 1031673 | +                | bioC              | Biotin biosynthesis protein BioC                       |
| G2583_1006 | CDS        | 1031666 | 1032343 | +                | bioD              | Dethiobiotin synthase                                  |
| G2583_1007 | CDS        | 1032922 | 1034943 | +                | uvrB              | UvrABC system protein B                                |
| G2583_1008 | CDS        | 1035134 | 1036042 | -                | ybhK              | hypothetical protein                                   |
| G2583_1009 | CDS        | 1036439 | 1037428 | +                | moaA              | Molybdenum cofactor biosynthesis protein A             |
| G2583_1010 | CDS        | 1037450 | 1037962 | +                | moaB              | Molybdenum cofactor biosynthesis protein B             |
| G2583_1011 | CDS        | 1037965 | 1038450 | +                | moaC              | Molybdenum cofactor biosynthesis protein C             |
| G2583_1012 | CDS        | 1038443 | 1038688 | +                | moaD              | Molybdopterin biosynthesis                             |
| G2583_1013 | CDS        | 1038690 | 1039142 | +                | moaE              | Molybdopterin converting factor, subunit 2             |
| G2583_1014 | CDS        | 1039278 | 1039982 | +                | ybhL              | hypothetical protein                                   |
| G2583_1015 | CDS        | 1040190 | 1040903 | +                | ybhM              | hypothetical protein                                   |
| G2583_1016 | CDS        | 1040939 | 1041895 | -                | ybhN              | hypothetical protein                                   |
| G2583_1017 | CDS        | 1041895 | 1043136 | -                | ybhO              | Putative cardiolipin synthetase ybhO                   |
| G2583_1018 | CDS        | 1043133 | 1043894 | -                | ybhP              | hypothetical protein                                   |
| G2583_1019 | CDS        | 1044027 | 1044437 | +                | ybhQ              | Inner membrane protein ybhQ                            |
| G2583_1020 | CDS        | 1044399 | 1045505 | -                | ybhR              | hypothetical protein                                   |

| Locus_tag  | Type  | Start   | End     | +/- <sup>a</sup> | Gene <sup>b</sup> | Product                                                     |
|------------|-------|---------|---------|------------------|-------------------|-------------------------------------------------------------|
| G2583_1021 | CDS   | 1045516 | 1046649 | -                | ybhS              | ABC-2 type transporter, permease protein                    |
| G2583_1022 | CDS   | 1046642 | 1048393 | -                | ybhF              | Putative ATP-binding component of a transport system        |
| G2583_1023 | CDS   | 1048371 | 1049369 | -                | ybhG              | UPF0194 membrane protein ybhG precursor                     |
| G2583_1024 | CDS   | 1049369 | 1050052 | -                | ybiH              | Hypothetical transcriptional regulator ybiH                 |
| G2583_1025 | CDS   | 1050269 | 1051636 | +                | rhIE              | ATP-dependent RNA helicase RhIE                             |
| G2583_1026 | CDS   | 1052244 | 1054256 | +                | sopA              | hypothetical protein                                        |
| G2583_1027 | CDS   | 1054402 | 1056690 | +                | dinG              | ATP-dependent DNA helicase DinG                             |
| G2583_1028 | CDS   | 1056718 | 1057680 | +                | ybiB              | Glycosyl transferase family protein                         |
| G2583_1029 | CDS   | 1057821 | 1058906 | +                | ybiC              | Uncharacterized oxidoreductase ybiC                         |
| G2583_1030 | CDS   | 1059135 | 1059395 | -                | ybiJ              | hypothetical protein                                        |
| G2583_1031 | CDS   | 1059660 | 1059926 | -                | ybiI              | C4-type zinc finger protein, DksA/TraR family               |
| G2583_1032 | CDS   | 1060000 | 1060677 | -                | ybiX              | Putative enzyme                                             |
| G2583_1033 | CDS   | 1060719 | 1063001 | -                | fiu               | Catechol siderophore receptor fiu precursor                 |
| G2583_1034 | CDS   | 1063266 | 1063670 | -                | ybiM              | hypothetical protein                                        |
| G2583_1035 | CDS   | 1063721 | 1064728 | +                | ybiN              | hypothetical protein                                        |
| G2583_1036 | CDS   | 1064725 | 1066950 | -                | ybiO              | Transporter, small conductance mechanosensitive ion channel |
| G2583_1037 | CDS   | 1067067 | 1067789 | -                | glnQ              | Glutamine ABC transporter, ATP-binding protein              |
| G2583_1038 | CDS   | 1067786 | 1068445 | -                | glnP              | Glutamine transport system permease protein glnP            |
| G2583_1039 | CDS   | 1068583 | 1069329 | -                | glnH              | hypothetical protein                                        |
| G2583_1040 | CDS   | 1069733 | 1070236 | -                | dps               | Global regulator, starvation conditions                     |
| G2583_1041 | CDS   | 1070535 | 1071422 | -                | rhtA              | Inner membrane transporter rhtA                             |
| G2583_1042 | CDS   | 1071775 | 1072290 | +                | ompX              | Outer membrane protein X precursor                          |
| G2583_1043 | CDS   | 1072339 | 1073922 | -                | ybiP              | Sulfatase family protein                                    |
| G2583_1044 | CDS   | 1074158 | 1074265 | +                | yliL              | hypothetical protein                                        |
| G2583_1045 | CDS   | 1074508 | 1074975 | +                | mntR              | manganese transport regulator MntR                          |
| G2583_1046 | CDS   | 1074972 | 1076090 | +                | ybiR              | Citrate transporter family protein                          |
| G2583_1047 | CDS   | 1076148 | 1077068 | -                | ybiS              | hypothetical protein                                        |
| G2583_1048 | CDS   | 1077287 | 1078879 | +                | ybiT              | Uncharacterized ABC transporter ATP-binding protein ybiT    |
| G2583_1049 | CDS   | 1079047 | 1080312 | -                | ybiU              | hypothetical protein                                        |
| G2583_1050 | CDS   | 1080464 | 1081279 | -                | ybiV              | Sugar phosphatase SupH                                      |
| G2583_1051 | CDS   | 1081425 | 1083857 | -                | ybiW              | Pyruvate-formate lyase                                      |
| G2583_1052 | CDS   | 1083863 | 1084762 | -                | ybiY              | Glycyl-radical enzyme activating protein family             |
| G2583_1053 | CDS   | 1084893 | 1085555 | +                | fsaA              | Fructose-6-phosphate aldolase 1                             |
| G2583_1054 | CDS   | 1085734 | 1086483 | -                | moeB              | Molybdopterin biosynthesis                                  |
| G2583_1055 | CDS   | 1086483 | 1087718 | -                | moeA              | Molybdopterin biosynthesis protein MoeA                     |
| G2583_1056 | CDS   | 1087922 | 1088887 | +                | iaaA              | Putative asparaginase                                       |
| G2583_1057 | CDS   | 1088874 | 1090745 | +                | gsiA              | Glutathione ABC transporter, ATP-binding protein GsiA       |
| G2583_1058 | CDS   | 1090765 | 1092303 | +                | gsiB              | Glutathione-binding protein gsiB precursor                  |
| G2583_1059 | CDS   | 1092321 | 1093241 | +                | gsiC              | Glutathione transport system permease protein gsiC          |
| G2583_1060 | CDS   | 1093244 | 1094155 | +                | gsiD              | Glutathione transport system permease protein gsiD          |
| G2583_1061 | CDS   | 1094333 | 1096681 | +                | yliE              | cyclic diguanylate phosphodiesterase (EAL) domain protein   |
| G2583_1062 | CDS   | 1096689 | 1098017 | +                | yliF              | Uncharacterized membrane protein yliF                       |
| G2583_1063 | CDS   | 1098087 | 1098416 | -                | -                 | Helix-turn-helix DNA-binding domain protein                 |
| G2583_1064 | CDS   | 1098406 | 1098792 | -                | -                 | hypothetical protein                                        |
| G2583_1065 | CDS   | 1099018 | 1100343 | -                | yliG              | UPF0004 protein yliG                                        |
| G2583_1066 | CDS   | 1100556 | 1100939 | +                | bssR              | Biofilm regulator bssR                                      |
| G2583_1067 | CDS   | 1101050 | 1102165 | +                | yliI              | Glucose / sorbosone dehydrogenase protein                   |
| G2583_1068 | CDS   | 1102162 | 1102794 | -                | yliJ              | putative transferase                                        |
| G2583_1069 | CDS   | 1103025 | 1104236 | +                | dacC              | Penicillin-binding protein 6                                |
| G2583_1070 | CDS   | 1104283 | 1105041 | -                | deoR              | Deoxyribose operon repressor                                |
| G2583_1071 | CDS   | 1105099 | 1105695 | -                | ybjG              | Undecaprenyl-diphosphatase                                  |
| G2583_1072 | CDS   | 1105980 | 1107212 | +                | cmr               | Multidrug translocase MdfA                                  |
| G2583_1073 | CDS   | 1107253 | 1107537 | -                | ybjH              | hypothetical protein                                        |
| G2583_1074 | CDS   | 1107623 | 1108438 | -                | ybjI              | Cof-like hydrolase                                          |
| G2583_1075 | CDS   | 1108438 | 1109646 | -                | ybjJ              | putative DEOR-type transcriptional regulator                |
| G2583_1076 | CDS   | 1109730 | 1110266 | +                | ybjK              | putative DEOR-type transcriptional regulator                |
| G2583_1077 | ncRNA | 1110283 | 1110361 | -                | rybB              | ncRNA                                                       |
| G2583_1078 | CDS   | 1110441 | 1112126 | -                | ybjL              | Putative transport protein ybjL                             |
| G2583_1079 | CDS   | 1112396 | 1112773 | +                | ybjM              | Inner membrane protein ybjM                                 |
| G2583_1080 | CDS   | 1112803 | 1113060 | -                | grxA              | Glutaredoxin 1                                              |

| Locus_tag  | Type       | Start   | End     | +/- <sup>a</sup> | Gene <sup>b</sup> | Product                                                        |
|------------|------------|---------|---------|------------------|-------------------|----------------------------------------------------------------|
| G2583_1081 | CDS        | 1113220 | 1113507 | +                | ybjC              | hypothetical protein                                           |
| G2583_1082 | CDS        | 1113491 | 1114213 | +                | nfsA              | Oxygen-insensitive NADPH nitroreductase                        |
| G2583_1083 | CDS        | 1114274 | 1115176 | +                | rimK              | Ribosomal protein S6 modification protein                      |
| G2583_1084 | CDS        | 1115264 | 1115740 | +                | ybjN              | Putative sensory transduction regulator                        |
| G2583_1085 | CDS        | 1115941 | 1117203 | +                | potF              | Putrescine ABC transporter, periplasmic putrescine-binding     |
| G2583_1086 | CDS        | 1117298 | 1118431 | +                | potG              | Putrescine transport ATP-binding protein PotG                  |
| G2583_1087 | CDS        | 1118441 | 1119394 | +                | potH              | Putrescine transport protein                                   |
| G2583_1088 | CDS        | 1119391 | 1120236 | +                | potI              | Putrescine ABC transporter, permease protein PotI              |
| G2583_1089 | CDS        | 1120296 | 1120784 | +                | ybjO              | Inner membrane protein ybjO                                    |
| G2583_1090 | CDS        | 1120825 | 1121952 | +                | rumB              | 23S rRNA (uracil-5-)-methyltransferase rumB (23S rRNA(M- 5-    |
| G2583_1091 | CDS        | 1122232 | 1123575 | +                | ulaA              | Ascorbate-specific PTS system enzyme IIC                       |
| G2583_1092 | CDS        | 1123597 | 1123917 | +                | -                 | hypothetical protein                                           |
| G2583_1093 | CDS        | 1123929 | 1125410 | +                | -                 | putative sulfatase                                             |
| G2583_1094 | CDS        | 1125461 | 1126243 | -                | artJ              | Arginine 3rd transport system periplasmic binding protein      |
| G2583_1095 | CDS        | 1126483 | 1127151 | -                | artM              | Arginine transport system permease protein artM                |
| G2583_1096 | CDS        | 1127151 | 1127867 | -                | artQ              | Arginine ABC transporter, permease protein ArtQ                |
| G2583_1097 | CDS        | 1127874 | 1128605 | -                | artI              | Arginine ABC transporter, periplasmic arginine-binding protein |
| G2583_1098 | CDS        | 1128623 | 1129351 | -                | artP              | Arginine transport ATP-binding protein ArtP                    |
| G2583_1099 | CDS        | 1129569 | 1130090 | -                | ybjP              | Putative lipoprotein YbjP                                      |
| G2583_1100 | CDS        | 1130098 | 1130280 | -                | -                 | hypothetical protein                                           |
| G2583_1101 | pseudogene | 1130708 | 1132507 | +                | -                 | hypothetical protein                                           |
| G2583_1102 | CDS        | 1132475 | 1132663 | -                | -                 | hypothetical protein                                           |
| G2583_1103 | CDS        | 1132718 | 1133041 | +                | ybjQ              | UPF0145 protein ybjQ                                           |
| G2583_1104 | CDS        | 1133038 | 1133868 | +                | ybjR              | N-acetylmuramoyl-L-alanine amidase AmiD                        |
| G2583_1105 | CDS        | 1133865 | 1134914 | -                | ybjS              | NAD dependent epimerase/dehydratase family                     |
| G2583_1106 | CDS        | 1134977 | 1136407 | -                | ybjT              | NAD dependent epimerase/dehydratase family protein             |
| G2583_1107 | CDS        | 1136418 | 1137419 | -                | ItaE              | Low specificity L-threonine aldolase                           |
| G2583_1108 | CDS        | 1137456 | 1139174 | -                | poxB              | Pyruvate dehydrogenase                                         |
| G2583_1109 | CDS        | 1139307 | 1140275 | -                | hcr               | NADH oxidoreductase hcr                                        |
| G2583_1110 | CDS        | 1140287 | 1141939 | -                | hcp               | Hydroxylamine reductase                                        |
| G2583_1111 | CDS        | 1142083 | 1142982 | -                | ybjE              | Putative surface protein                                       |
| G2583_1112 | CDS        | 1143440 | 1144135 | -                | aqpZ              | Aquaporin Z                                                    |
| G2583_1113 | CDS        | 1144561 | 1146219 | +                | ybjD              | hypothetical protein                                           |
| G2583_1114 | CDS        | 1146216 | 1147208 | -                | ybjX              | putative enzyme                                                |
| G2583_1115 | CDS        | 1147323 | 1148438 | +                | macA              | macrolide transporter subunit MacA                             |
| G2583_1116 | CDS        | 1148435 | 1150381 | +                | macB              | Macrolide-specific ABC-type efflux carrier protein MacB        |
| G2583_1117 | CDS        | 1150454 | 1150708 | -                | cspD              | Cold shock proteins                                            |
| G2583_1118 | CDS        | 1151001 | 1151321 | +                | clpS              | ATP-dependent Clp protease adapter protein clpS                |
| G2583_1119 | CDS        | 1151352 | 1153628 | +                | clpA              | ATP-dependent clp protease ATP-binding subunit clpA            |
| G2583_1120 | tRNA       | 1153972 | 1154061 | -                | -                 | Ser tRNA                                                       |
| G2583_1121 | CDS        | 1154314 | 1154532 | -                | infA              | hypothetical protein                                           |
| G2583_1122 | CDS        | 1154817 | 1155521 | -                | aat               | Leucyl/phenylalanyl-tRNA--protein transferase                  |
| G2583_1123 | CDS        | 1155563 | 1157284 | -                | cydC              | ABC transporter, CydDC cysteine exporter (CydDC-E) family,     |
| G2583_1124 | CDS        | 1157285 | 1159051 | -                | cydD              | ABC transporter, CydDC cysteine exporter (CydDC-E) family,     |
| G2583_1125 | CDS        | 1159174 | 1160139 | -                | trxB              | Thioredoxin reductase                                          |
| G2583_1126 | CDS        | 1160684 | 1161178 | +                | Irp               | Leucine-responsive regulatory protein                          |
| G2583_1127 | CDS        | 1161313 | 1165341 | +                | ftsK              | DNA translocase FtsK                                           |
| G2583_1128 | CDS        | 1165493 | 1166107 | +                | lolA              | Outer-membrane lipoprotein carrier protein precursor           |
| G2583_1129 | CDS        | 1166118 | 1167461 | +                | rarA              | Replication-associated recombination protein A                 |
| G2583_1130 | CDS        | 1167552 | 1168844 | +                | serS              | Seryl-tRNA synthetase                                          |
| G2583_1131 | CDS        | 1169083 | 1171527 | +                | dmsA              | Anaerobic dimethyl sulfoxide reductase, A subunit              |
| G2583_1132 | CDS        | 1171538 | 1172155 | +                | dmsB              | Anaerobic dimethyl sulfoxide reductase chain B                 |
| G2583_1133 | CDS        | 1172157 | 1173020 | +                | dmsC              | Anaerobic dimethyl sulfoxide reductase subunit C               |
| G2583_1134 | CDS        | 1173056 | 1173682 | -                | ycaC              | Protein ycaC                                                   |
| G2583_1135 | CDS        | 1173997 | 1175145 | +                | ycaD              | putative MFS family transporter protein                        |
| G2583_1136 | CDS        | 1175163 | 1176785 | +                | ycaM              | Amino acid permease family protein                             |
| G2583_1137 | CDS        | 1176995 | 1177735 | -                | pflA              | Pyruvate formate lyase-activating enzyme 1                     |
| G2583_1138 | CDS        | 1177927 | 1180209 | -                | pflB              | Formate acetyltransferase                                      |
| G2583_1139 | CDS        | 1180264 | 1181121 | -                | focA              | FocA formate FNT transporter                                   |
| G2583_1140 | CDS        | 1181527 | 1183296 | -                | ycaO              | hypothetical protein                                           |

| Locus_tag  | Type       | Start   | End     | +/- <sup>a</sup> | Gene <sup>b</sup> | Product                                                           |
|------------|------------|---------|---------|------------------|-------------------|-------------------------------------------------------------------|
| G2583_1141 | CDS        | 1183417 | 1184109 | +                | ycaP              | hypothetical protein                                              |
| G2583_1142 | CDS        | 1184308 | 1185396 | +                | serC              | Phosphoserine aminotransferase                                    |
| G2583_1143 | CDS        | 1185467 | 1186750 | +                | aroA              | 3-phosphoshikimate 1-carboxyvinyltransferase                      |
| G2583_1144 | CDS        | 1186895 | 1187683 | +                | ycaL              | Peptidase, M48B family                                            |
| G2583_1145 | CDS        | 1187856 | 1188539 | +                | cmk               | Cytidylate kinase                                                 |
| G2583_1146 | CDS        | 1188650 | 1190323 | +                | rpsA              | 30S ribosomal protein S1                                          |
| G2583_1147 | CDS        | 1190483 | 1190767 | +                | ihfB              | Integration host factor subunit beta                              |
| G2583_1148 | CDS        | 1190974 | 1193238 | +                | ycaI              | DNA internalization-related competence protein ComEC/Rec2         |
| G2583_1149 | CDS        | 1193275 | 1195023 | +                | msbA              | Lipid A export ATP-binding/permease protein msbA                  |
| G2583_1150 | CDS        | 1195020 | 1196006 | +                | lpxK              | Tetraacyldisaccharide 4'-kinase                                   |
| G2583_1151 | CDS        | 1196043 | 1197275 | +                | ycaQ              | hypothetical protein                                              |
| G2583_1152 | CDS        | 1197327 | 1197509 | +                | ycaR              | UPF0434 protein ycaR                                              |
| G2583_1153 | CDS        | 1197506 | 1198252 | +                | kdsB              | 3-deoxy-manno-octulosonate cytidyltransferase                     |
| G2583_1154 | CDS        | 1198406 | 1199299 | +                | ycbJ              | hypothetical protein                                              |
| G2583_1155 | CDS        | 1199276 | 1200055 | -                | ycbC              | hypothetical protein                                              |
| G2583_1156 | CDS        | 1200191 | 1200976 | +                | smtA              | SmtA protein                                                      |
| G2583_1157 | CDS        | 1200973 | 1202295 | +                | mukF              | Chromosome partition protein mukF                                 |
| G2583_1158 | CDS        | 1202276 | 1202980 | +                | mukE              | MukE                                                              |
| G2583_1159 | CDS        | 1202980 | 1207440 | +                | mukB              | Uncharacterized protein involved in chromosome partitioning       |
| G2583_1160 | CDS        | 1207701 | 1209548 | +                | ycbB              | Putative peptidoglycan binding domain                             |
| G2583_1161 | CDS        | 1209729 | 1210277 | +                | ycbK              | hypothetical protein                                              |
| G2583_1162 | CDS        | 1210304 | 1210951 | +                | ycbL              | Metallo-beta-lactamase family protein                             |
| G2583_1163 | CDS        | 1211002 | 1212192 | -                | aspC              | Aspartate transaminase                                            |
| G2583_1164 | CDS        | 1212376 | 1213464 | -                | ompF              | Outer membrane protein F                                          |
| G2583_1165 | CDS        | 1214066 | 1215466 | -                | asnS              | Asparaginyl-tRNA synthetase                                       |
| G2583_1166 | CDS        | 1215635 | 1216837 | -                | pncB              | Nicotinate phosphoribosyltransferase                              |
| G2583_1167 | CDS        | 1217103 | 1219715 | +                | pepN              | Aminopeptidase N                                                  |
| G2583_1168 | CDS        | 1219758 | 1220525 | -                | ssuB              | ABC transporter, ATP-binding protein                              |
| G2583_1169 | CDS        | 1220522 | 1221313 | -                | ssuC              | Putative sulfonate ABC transporter, permease protein              |
| G2583_1170 | CDS        | 1221325 | 1222470 | -                | ssuD              | Alkanesulfonate monooxygenase                                     |
| G2583_1171 | CDS        | 1222467 | 1223426 | -                | ssuA              | ABC transporter, periplasmic substrate-binding protein, aliphatic |
| G2583_1172 | CDS        | 1223419 | 1223994 | -                | ssuE              | NAD(P)H-dependent FMN reductase                                   |
| G2583_1173 | CDS        | 1224337 | 1224885 | +                | ycbQ              | Putative fimbrial-like protein                                    |
| G2583_1174 | CDS        | 1224968 | 1225669 | +                | ycbR              | Putative chaperone                                                |
| G2583_1175 | pseudogene | 1225694 | 1228293 | +                | ycbS              | PapC-like porin protein involved in fimbrial biogenesis           |
| G2583_1176 | CDS        | 1228284 | 1229354 | +                | ycbT              | Putative fimbrial protein                                         |
| G2583_1177 | CDS        | 1229400 | 1229909 | +                | ycbU              | Uncharacterized fimbrial-like protein ycbU precursor              |
| G2583_1178 | CDS        | 1229869 | 1230432 | +                | ycbV              | Putative fimbrial-like protein                                    |
| G2583_1179 | CDS        | 1230398 | 1231135 | +                | ycbF              | hypothetical protein                                              |
| G2583_1180 | CDS        | 1231246 | 1232256 | +                | pyrD              | Dihydroorotate dehydrogenase                                      |
| G2583_1181 | CDS        | 1232394 | 1232972 | +                | ycbW              | hypothetical protein                                              |
| G2583_1182 | CDS        | 1232969 | 1234078 | -                | ycbX              | MOSC domain protein                                               |
| G2583_1183 | CDS        | 1234322 | 1236430 | +                | rlmL              | Putative RNA methylase family UPF0020                             |
| G2583_1184 | CDS        | 1236442 | 1238349 | +                | uup               | ABC transporter, ATP-binding protein                              |
| G2583_1185 | CDS        | 1238479 | 1239732 | +                | pqiA              | Paraquat-inducible protein A                                      |
| G2583_1186 | CDS        | 1239737 | 1241377 | +                | pqiB              | Paraquat-inducible protein B                                      |
| G2583_1187 | CDS        | 1241374 | 1241937 | +                | ymbA              | putative lipoprotein                                              |
| G2583_1188 | CDS        | 1242193 | 1242360 | +                | rmf               | Ribosome modulation factor                                        |
| G2583_1189 | CDS        | 1242430 | 1242948 | -                | fabA              | 3-hydroxydecanoyl-ACP dehydratase                                 |
| G2583_1190 | CDS        | 1243017 | 1244777 | -                | ycbZ              | Peptidase, S16 (Lon protease) family                              |
| G2583_1191 | CDS        | 1244963 | 1245415 | +                | ycbG              | UPF0268 protein ycbG                                              |
| G2583_1192 | CDS        | 1245491 | 1246555 | -                | ompA              | OmpA domain protein transmembrane region-containing protein       |
| G2583_1193 | CDS        | 1246888 | 1247397 | -                | sulA              | Suppressor of lon                                                 |
| G2583_1194 | CDS        | 1247616 | 1248245 | +                | sxy               | conserved protein                                                 |
| G2583_1195 | CDS        | 1248208 | 1250370 | -                | yccS              | hypothetical protein                                              |
| G2583_1196 | CDS        | 1250380 | 1250826 | -                | yccF              | hypothetical protein                                              |
| G2583_1197 | CDS        | 1250949 | 1253003 | +                | helD              | DNA helicase IV                                                   |
| G2583_1198 | CDS        | 1253035 | 1253493 | -                | mgsA              | Methylglyoxal synthase                                            |
| G2583_1199 | CDS        | 1253589 | 1254251 | -                | yccT              | UPF0319 protein yccT precursor                                    |
| G2583_1200 | CDS        | 1254424 | 1254837 | +                | yccU              | hypothetical protein                                              |

| Locus_tag  | Type       | Start   | End     | +/- <sup>a</sup> | Gene <sup>b</sup> | Product                                                 |
|------------|------------|---------|---------|------------------|-------------------|---------------------------------------------------------|
| G2583_1201 | CDS        | 1254882 | 1255250 | -                | hspQ              | Heat shock protein hspQ                                 |
| G2583_1202 | CDS        | 1255257 | 1256447 | -                | yccW              | putative oxidoreductase                                 |
| G2583_1203 | CDS        | 1256542 | 1256820 | +                | yccX              | Acylphosphatase                                         |
| G2583_1204 | CDS        | 1256817 | 1257146 | -                | yccK              | Sulfurtransferase tusE                                  |
| G2583_1205 | CDS        | 1257237 | 1257896 | -                | yccA              | Inner membrane protein yccA                             |
| G2583_1206 | tRNA       | 1258103 | 1258191 | -                | -                 | Ser tRNA                                                |
| G2583_1207 | CDS        | 1258616 | 1259734 | +                | hyaA              | Nickel-dependent hydrogenase 1, small subunit           |
| G2583_1208 | CDS        | 1259731 | 1261524 | +                | hyaB              | Hydrogenase-1 large subunit                             |
| G2583_1209 | CDS        | 1261543 | 1262250 | +                | hyaC              | Probable Ni/Fe-hydrogenase 1 B-type cytochrome subunit  |
| G2583_1210 | CDS        | 1262247 | 1262834 | +                | hyaD              | hydrogenase 1 maturation protease                       |
| G2583_1211 | CDS        | 1262831 | 1263229 | +                | hyaE              | Hydrogenase-1 expression protein HyaE                   |
| G2583_1212 | CDS        | 1263226 | 1264083 | +                | hyaF              | Hydrogenase-1 operon protein HyaF                       |
| G2583_1213 | CDS        | 1264217 | 1265761 | +                | appC              | Cytochrome bd-II oxidase, subunit I                     |
| G2583_1214 | CDS        | 1265773 | 1266909 | +                | appB              | Cytochrome bd-II oxidase, subunit II                    |
| G2583_1215 | CDS        | 1267064 | 1268398 | +                | appA              | Phosphoanhydride phosphorylase                          |
| G2583_1216 | CDS        | 1268518 | 1270698 | -                | etk               | Tyrosine-protein kinase etk                             |
| G2583_1217 | CDS        | 1270718 | 1271164 | -                | etp               | Putative phosphatase                                    |
| G2583_1218 | CDS        | 1271152 | 1272291 | -                | gfcE              | Putative polysaccharide export protein gfcE precursor   |
| G2583_1219 | CDS        | 1272337 | 1274433 | -                | gfcD              | Group 4 capsule (G4C) polysaccharide, lipoprotein YmcA  |
| G2583_1220 | CDS        | 1274433 | 1275179 | -                | gfcC              | Group 4 capsule (G4C) polysaccharide, YmcB              |
| G2583_1221 | CDS        | 1275176 | 1275820 | -                | gfcB              | Group 4 capsule (G4C) polysaccharide, lipoprotein YmcC  |
| G2583_1222 | CDS        | 1275927 | 1276250 | -                | ymcD              | putative inner membrane protein                         |
| G2583_1223 | CDS        | 1276674 | 1276886 | -                | cspH              | Cold shock-like protein cspH                            |
| G2583_1224 | CDS        | 1277172 | 1277384 | +                | cspG              | Cold shock-like protein cspG                            |
| G2583_1225 | CDS        | 1277558 | 1277788 | +                | ymcE              | cold shock gene                                         |
| G2583_1226 | CDS        | 1278000 | 1279073 | -                | yccM              | 4Fe-4S binding domain protein                           |
| G2583_1227 | CDS        | 1279145 | 1281889 | -                | torS              | hybrid sensory histidine kinase TorS                    |
| G2583_1228 | CDS        | 1281972 | 1283000 | +                | torT              | Periplasmic protein torT precursor                      |
| G2583_1229 | CDS        | 1282973 | 1283665 | -                | torR              | TorCAD operon transcriptional regulatory protein torR   |
| G2583_1230 | CDS        | 1283795 | 1284967 | +                | torC              | Cytochrome c-type protein TorC                          |
| G2583_1231 | CDS        | 1284967 | 1287513 | +                | torA              | Trimethylamine-N-oxide reductase 1 precursor            |
| G2583_1232 | CDS        | 1287510 | 1288109 | +                | torD              | Chaperone protein torD                                  |
| G2583_1233 | CDS        | 1288263 | 1288568 | -                | cbpM              | Chaperone modulatory protein cbpM                       |
| G2583_1234 | CDS        | 1288568 | 1289488 | -                | cbpA              | Curved DNA-binding protein                              |
| G2583_1235 | CDS        | 1289748 | 1291049 | +                | yccE              | conserved hypothetical protein                          |
| G2583_1236 | CDS        | 1291340 | 1292581 | +                | agp               | Glucose-1-phosphatase                                   |
| G2583_1237 | CDS        | 1292619 | 1292846 | -                | yccJ              | hypothetical protein                                    |
| G2583_1238 | CDS        | 1292867 | 1293463 | -                | wrbA              | Flavoprotein wrbA                                       |
| G2583_1239 | CDS        | 1294092 | 1295486 | -                | rutG              | Putative purine permease ycdG                           |
| G2583_1240 | CDS        | 1295441 | 1295935 | -                | rutF              | Flavin reductase domain protein FMN-binding             |
| G2583_1241 | CDS        | 1295946 | 1296536 | -                | rutE              | Putative NADH dehydrogenase/NAD(P)H nitroreductase rutE |
| G2583_1242 | CDS        | 1296546 | 1297346 | -                | rutD              | putative acetyltransferase                              |
| G2583_1243 | CDS        | 1297354 | 1297740 | -                | rutC              | hypothetical protein                                    |
| G2583_1244 | CDS        | 1297752 | 1298486 | -                | rutB              | Putative synthetase                                     |
| G2583_1245 | CDS        | 1298444 | 1299592 | -                | rutA              | Putative monooxygenase rutA                             |
| G2583_1246 | CDS        | 1299823 | 1300461 | +                | rutR              | putative tet operon regulator                           |
| G2583_1247 | CDS        | 1300501 | 1304463 | -                | putA              | Bifunctional protein PutA                               |
| G2583_1248 | CDS        | 1304886 | 1306394 | +                | putP              | Sodium/proline symporter                                |
| G2583_1249 | CDS        | 1306550 | 1307893 | -                | -                 | hypothetical protein                                    |
| G2583_1250 | CDS        | 1308455 | 1308601 | +                | -                 | hypothetical protein                                    |
| G2583_1251 | CDS        | 1308892 | 1309038 | -                | -                 | hypothetical protein                                    |
| G2583_1252 | CDS        | 1309065 | 1309904 | +                | ycdN              | Ferrous iron permease efeU                              |
| G2583_1253 | CDS        | 1309962 | 1311089 | +                | ycdO              | UPF0409 protein ycdO precursor                          |
| G2583_1254 | CDS        | 1311095 | 1312366 | +                | ycdB              | Tat-translocated enzyme                                 |
| G2583_1255 | CDS        | 1312629 | 1313693 | +                | phoH              | hypothetical protein                                    |
| G2583_1256 | CDS        | 1313743 | 1314156 | -                | pgaD              | Biofilm PGA synthesis protein pgaD                      |
| G2583_1257 | CDS        | 1314158 | 1315483 | -                | pgaC              | Biofilm PGA synthesis N-glycosyltransferase pgaC        |
| G2583_1258 | pseudogene | 1315476 | 1317493 | -                | pgaB              | Biofilm PGA synthesis lipoprotein pgaB                  |
| G2583_1259 | CDS        | 1317502 | 1319925 | -                | pgaA              | Biofilm PGA synthesis protein pgaA precursor            |
| G2583_1260 | pseudogene | 1320512 | 1321869 | +                | ycdT              | diguanylate cyclase (GGDEF) domain protein              |

| Locus_tag  | Type | Start   | End     | +/- <sup>a</sup> | Gene <sup>b</sup> | Product                                                      |
|------------|------|---------|---------|------------------|-------------------|--------------------------------------------------------------|
| G2583_1261 | CDS  | 1321967 | 1323577 | +                | rtn               | Rtn-like protein                                             |
| G2583_1262 | CDS  | 1323679 | 1324170 | -                | fidL              | hypothetical protein                                         |
| G2583_1263 | CDS  | 1324175 | 1324987 | -                | marT              | hypothetical protein                                         |
| G2583_1264 | CDS  | 1325666 | 1326457 | +                | -                 | 2-deoxy-D-gluconate 3-dehydrogenase                          |
| G2583_1265 | CDS  | 1326603 | 1327292 | -                | -                 | Putative chaperone protein                                   |
| G2583_1266 | CDS  | 1327289 | 1328623 | -                | mrkD              | hypothetical protein                                         |
| G2583_1267 | CDS  | 1328639 | 1331161 | -                | mrkC              | Putative outer membrane usher protein                        |
| G2583_1268 | CDS  | 1331214 | 1331936 | -                | -                 | Gram-negative pili assembly chaperone                        |
| G2583_1269 | CDS  | 1332001 | 1332561 | -                | mrkA              | Fimbrial protein                                             |
| G2583_1270 | CDS  | 1332604 | 1333227 | -                | -                 | hypothetical protein                                         |
| G2583_1271 | CDS  | 1333496 | 1333606 | -                | -                 | hypothetical protein                                         |
| G2583_1272 | CDS  | 1334068 | 1334187 | -                | -                 | hypothetical protein                                         |
| G2583_1273 | CDS  | 1334618 | 1338430 | +                | -                 | Hemagglutinin/hemolysin-related protein                      |
| G2583_1274 | CDS  | 1338519 | 1340138 | +                | -                 | Putative outer membrane transporter of ShlA/HecA/FhaA        |
| G2583_1275 | CDS  | 1340154 | 1340522 | +                | -                 | Probable holo-[acyl-carrier-protein] synthase 2              |
| G2583_1276 | CDS  | 1340542 | 1341297 | +                | -                 | NAD dependent epimerase/dehydratase family                   |
| G2583_1277 | CDS  | 1341301 | 1341849 | +                | cylZ              | Putative fatty acyl chain dehydrase                          |
| G2583_1278 | CDS  | 1341871 | 1342152 | +                | -                 | Putative acyl-carrier protein                                |
| G2583_1279 | CDS  | 1342188 | 1343348 | +                | gcvT              | Putative aminomethyltransferase                              |
| G2583_1280 | CDS  | 1343422 | 1345980 | +                | fabF              | Putative beta-ketoacyl-[acyl carrier protein] synthase       |
| G2583_1281 | CDS  | 1345985 | 1347208 | +                | olmA              | Beta-ketoacyl synthase, C-domain protein                     |
| G2583_1282 | CDS  | 1347205 | 1348158 | +                | -                 | hypothetical protein                                         |
| G2583_1283 | CDS  | 1348169 | 1348876 | +                | -                 | Lipoprotein-releasing system ATP-binding protein LolD        |
| G2583_1284 | CDS  | 1348860 | 1349516 | +                | -                 | hypothetical protein                                         |
| G2583_1285 | CDS  | 1349517 | 1350827 | +                | -                 | hypothetical protein                                         |
| G2583_1286 | CDS  | 1350836 | 1351624 | +                | -                 | hypothetical protein                                         |
| G2583_1287 | CDS  | 1351621 | 1353009 | +                | -                 | hypothetical protein                                         |
| G2583_1288 | CDS  | 1353020 | 1353964 | +                | -                 | Malonyl CoA-acyl carrier protein transacylase                |
| G2583_1289 | CDS  | 1353961 | 1354947 | +                | ycdU              | hypothetical protein                                         |
| G2583_1290 | tRNA | 1355153 | 1355228 | -                | -                 | Ser tRNA                                                     |
| G2583_1291 | CDS  | 1355422 | 1356399 | +                | ghrA              | Putative dehydrogenase                                       |
| G2583_1292 | CDS  | 1356454 | 1357191 | +                | ycdX              | Putative hydrolase ycdX                                      |
| G2583_1293 | CDS  | 1357215 | 1357769 | +                | ycdY              | Chaperone, TorD family                                       |
| G2583_1294 | CDS  | 1357823 | 1358362 | +                | ycdZ              | hypothetical protein                                         |
| G2583_1295 | CDS  | 1358426 | 1359259 | -                | csgG              | Curli production assembly/transport component csgG precursor |
| G2583_1296 | CDS  | 1359286 | 1359702 | -                | csgF              | Curli production assembly/transport component csgF precursor |
| G2583_1297 | CDS  | 1359727 | 1360116 | -                | csgE              | Curli production assembly/transport component csgE precursor |
| G2583_1298 | CDS  | 1360121 | 1360771 | -                | csgD              | CsgD                                                         |
| G2583_1299 | CDS  | 1361183 | 1361431 | -                | -                 | hypothetical protein                                         |
| G2583_1300 | CDS  | 1361498 | 1361980 | +                | csgB              | Minor curlin subunit                                         |
| G2583_1301 | CDS  | 1362021 | 1362479 | +                | csgA              | Major curlin subunit precursor                               |
| G2583_1302 | CDS  | 1362538 | 1362870 | +                | csgC              | CsgC                                                         |
| G2583_1303 | CDS  | 1362991 | 1363302 | +                | ymdA              | hypothetical protein                                         |
| G2583_1304 | CDS  | 1363397 | 1363930 | +                | ymdB              | UPF0189 protein ymdB                                         |
| G2583_1305 | CDS  | 1363872 | 1365353 | +                | ymdC              | Putative synthase                                            |
| G2583_1306 | CDS  | 1365361 | 1366518 | -                | mdoC              | Glucans biosynthesis protein C                               |
| G2583_1307 | CDS  | 1366911 | 1368446 | +                | mdoG              | Glucans biosynthesis protein G precursor                     |
| G2583_1308 | CDS  | 1368409 | 1370982 | +                | mdoH              | Periplasmic glucans biosynthesis protein MdoH                |
| G2583_1309 | CDS  | 1371155 | 1371382 | +                | yceK              | hypothetical protein                                         |
| G2583_1310 | CDS  | 1371383 | 1371760 | -                | msyB              | Acidic protein MsyB                                          |
| G2583_1311 | CDS  | 1371787 | 1371885 | -                | -                 | hypothetical protein                                         |
| G2583_1312 | CDS  | 1371840 | 1373066 | -                | mdtG              | Multidrug resistance protein mdtG                            |
| G2583_1313 | CDS  | 1373238 | 1374158 | -                | lpxL              | Heat shock protein                                           |
| G2583_1314 | CDS  | 1374383 | 1375435 | +                | yceA              | UPF0176 protein yceA                                         |
| G2583_1315 | CDS  | 1375477 | 1376052 | -                | yceI              | hypothetical protein                                         |
| G2583_1316 | CDS  | 1376056 | 1376622 | -                | yceJ              | Nickel-dependent hydrogenase b-type cytochrome subunit       |
| G2583_1317 | CDS  | 1376883 | 1377023 | -                | yceO              | hypothetical protein                                         |
| G2583_1318 | CDS  | 1377044 | 1378162 | -                | solA              | N-methyl-L-tryptophan oxidase                                |
| G2583_1319 | CDS  | 1378277 | 1378531 | -                | bssS              | hypothetical protein                                         |
| G2583_1320 | CDS  | 1378821 | 1379066 | -                | dinI              | DinI                                                         |

| Locus_tag  | Type  | Start   | End     | +/- <sup>a</sup> | Gene <sup>b</sup> | Product                                                      |
|------------|-------|---------|---------|------------------|-------------------|--------------------------------------------------------------|
| G2583_1321 | CDS   | 1379140 | 1380186 | -                | pyrC              | Dihydroorotase                                               |
| G2583_1322 | CDS   | 1380292 | 1380852 | -                | yceB              | Putative lipoprotein yceB                                    |
| G2583_1323 | CDS   | 1380986 | 1381633 | -                | grxB              | Glutaredoxin-2                                               |
| G2583_1324 | CDS   | 1381697 | 1382905 | -                | mdtH              | Multidrug resistance protein mdtH                            |
| G2583_1325 | CDS   | 1383141 | 1383725 | +                | rimJ              | Ribosomal-protein-alanine acetyltransferase                  |
| G2583_1326 | CDS   | 1383736 | 1384383 | +                | yceH              | UPF0502 protein yceH                                         |
| G2583_1327 | CDS   | 1384385 | 1385308 | +                | MviM              | Oxidoreductase family, NAD-binding                           |
| G2583_1328 | CDS   | 1385418 | 1386953 | +                | MviN              | Virulence factor mviN-like protein                           |
| G2583_1329 | CDS   | 1386993 | 1387409 | -                | flgN              | Flagellar biosynthesis/type III secretory path way chaperone |
| G2583_1330 | CDS   | 1387414 | 1387707 | -                | flgM              | Negative regulator of flagellin synthesis                    |
| G2583_1331 | CDS   | 1387783 | 1388442 | -                | flgA              | Flagellar biosynthesis                                       |
| G2583_1332 | CDS   | 1388597 | 1389013 | +                | flgB              | Flagellar basal-body rod protein FlgB                        |
| G2583_1333 | CDS   | 1389017 | 1389421 | +                | flgC              | Cell-proximal portion of basal-body rod                      |
| G2583_1334 | CDS   | 1389433 | 1390128 | +                | flgD              | Flagellar hook protein FlgE                                  |
| G2583_1335 | CDS   | 1390153 | 1391358 | +                | flgE              | Flagellar hook protein FlgE                                  |
| G2583_1336 | CDS   | 1391378 | 1392133 | +                | flgF              | Flagellar basal-body rod protein FlgF                        |
| G2583_1337 | CDS   | 1392271 | 1393053 | +                | flgG              | Flagellar basal-body rod protein flgG                        |
| G2583_1338 | CDS   | 1393106 | 1393804 | +                | flgH              | Flagellar L-ring protein precursor                           |
| G2583_1339 | CDS   | 1393813 | 1394913 | +                | flgI              | flagellar basal body P-ring protein                          |
| G2583_1340 | CDS   | 1394913 | 1395854 | +                | flgJ              | Peptidoglycan hydrolase flgJ                                 |
| G2583_1341 | CDS   | 1395920 | 1397563 | +                | flgK              | Flagellar hook-associated protein FlgK                       |
| G2583_1342 | CDS   | 1397575 | 1398528 | +                | flgL              | Flagellar hook-associated protein 3                          |
| G2583_1343 | CDS   | 1398723 | 1401908 | -                | rne               | Ribonuclease, Rne/Rng family                                 |
| G2583_1344 | CDS   | 1401989 | 1402363 | +                | yceQ              | hypothetical protein                                         |
| G2583_1345 | CDS   | 1402481 | 1403440 | +                | rluC              | Ribosomal large subunit pseudouridine synthase C             |
| G2583_1346 | CDS   | 1403552 | 1404175 | -                | yceF              | Septum formation protein Maf                                 |
| G2583_1347 | ncRNA | 1404130 | 1404298 | +                | sraB              | ncRNA                                                        |
| G2583_1348 | CDS   | 1404335 | 1404856 | +                | yceD              | hypothetical protein                                         |
| G2583_1349 | CDS   | 1404908 | 1405081 | +                | rpmF              | 50S ribosomal protein L32                                    |
| G2583_1350 | CDS   | 1405162 | 1406232 | +                | plsX              | fatty acid/phospholipid synthesis protein                    |
| G2583_1351 | CDS   | 1406300 | 1407253 | +                | fabH              | 3-oxoacyl-[acyl-carrier-protein] synthase 3                  |
| G2583_1352 | CDS   | 1407269 | 1408198 | +                | fabD              | Malonyl CoA-acyl carrier protein transacylase                |
| G2583_1353 | CDS   | 1408211 | 1408945 | +                | fabG              | 3-oxoacyl-[acyl-carrier-protein] reductase                   |
| G2583_1354 | CDS   | 1409156 | 1409392 | +                | acpP              | Acyl carrier protein                                         |
| G2583_1355 | CDS   | 1409480 | 1410721 | +                | fabF              | 3-oxoacyl-[acyl-carrier-protein] synthase 2                  |
| G2583_1356 | CDS   | 1410841 | 1411650 | +                | pabC              | Aminodeoxychorismate lyase                                   |
| G2583_1357 | CDS   | 1411653 | 1412675 | +                | yceG              | Putative thymidylate kinase                                  |
| G2583_1358 | CDS   | 1412665 | 1413306 | +                | tmk               | Thymidylate kinase                                           |
| G2583_1359 | CDS   | 1413303 | 1414307 | +                | holB              | DNA polymerase III, delta' subunit                           |
| G2583_1360 | CDS   | 1414318 | 1415115 | +                | ycfH              | Hydrolase, TatD family                                       |
| G2583_1361 | CDS   | 1415410 | 1416843 | +                | ptsG              | hypothetical protein                                         |
| G2583_1362 | CDS   | 1416903 | 1419083 | -                | fhuE              | Outer membrane receptor for ferric iron uptake               |
| G2583_1363 | CDS   | 1419399 | 1419776 | +                | hinT              | hypothetical protein                                         |
| G2583_1364 | CDS   | 1419779 | 1420156 | +                | ycfL              | Putative outer membrane lipoprotein YcfL                     |
| G2583_1365 | CDS   | 1420170 | 1420811 | +                | ycfM              | hypothetical protein                                         |
| G2583_1366 | CDS   | 1420792 | 1421616 | +                | thiK              | Thiamine kinase                                              |
| G2583_1367 | CDS   | 1421627 | 1422652 | +                | nagZ              | Beta-hexosaminidase                                          |
| G2583_1368 | CDS   | 1422675 | 1423217 | +                | ycfP              | hypothetical protein                                         |
| G2583_1369 | CDS   | 1423617 | 1424921 | +                | ndh               | NADH dehydrogenase                                           |
| G2583_1370 | CDS   | 1425148 | 1425687 | +                | ycfJ              | Surface antigen domain protein                               |
| G2583_1371 | CDS   | 1425749 | 1426459 | -                | ycfQ              | hypothetical protein                                         |
| G2583_1372 | CDS   | 1426622 | 1426879 | +                | bhsA              | Putative outer membrane protein                              |
| G2583_1373 | CDS   | 1426962 | 1427924 | -                | ycfS              | hypothetical protein                                         |
| G2583_1374 | CDS   | 1428068 | 1431514 | -                | mfd               | transcription-repair coupling factor                         |
| G2583_1375 | CDS   | 1431642 | 1432715 | -                | ycfT              | hypothetical protein                                         |
| G2583_1376 | CDS   | 1432977 | 1434176 | +                | lolC              | outer membrane-specific lipoprotein transporter subunit LolC |
| G2583_1377 | CDS   | 1434169 | 1434870 | +                | lolD              | ABC transporter, ATP-binding protein                         |
| G2583_1378 | CDS   | 1434870 | 1436114 | +                | lolE              | Lipoprotein releasing system, transmembrane protein LolE     |
| G2583_1379 | CDS   | 1436143 | 1437054 | +                | nagK              | N-acetyl-D-glucosamine kinase                                |
| G2583_1380 | CDS   | 1437070 | 1437891 | +                | cobB              | NAD-dependent deacetylase                                    |

| Locus_tag  | Type       | Start   | End     | +/- <sup>a</sup> | Gene <sup>b</sup> | Product                                                      |
|------------|------------|---------|---------|------------------|-------------------|--------------------------------------------------------------|
| G2583_1381 | CDS        | 1438047 | 1439093 | -                | potD              | Spermidine/putrescine-binding periplasmic protein precursor  |
| G2583_1382 | CDS        | 1439090 | 1439884 | -                | potC              | Spermidine/putrescine transport system permease              |
| G2583_1383 | CDS        | 1439881 | 1440738 | -                | potB              | Spermidine/putrescine ABC transporter, permease protein PotB |
| G2583_1384 | CDS        | 1440722 | 1441858 | -                | potA              | Spermidine/putrescine import ATP-binding protein potA        |
| G2583_1385 | CDS        | 1442108 | 1443334 | +                | pepT              | Peptidase T                                                  |
| G2583_1386 | CDS        | 1443383 | 1444513 | -                | ycfD              | YcfD protein                                                 |
| G2583_1387 | CDS        | 1444732 | 1445982 | +                | -                 | Site-specific recombinase, phage integrase family            |
| G2583_1388 | CDS        | 1446348 | 1446536 | +                | -                 | putative DNA binding protein                                 |
| G2583_1389 | CDS        | 1446403 | 1446573 | -                | -                 | unknown protein encoded by prophage CP-933C                  |
| G2583_1390 | CDS        | 1446594 | 1447538 | +                | -                 | conserved hypothetical protein                               |
| G2583_1391 | CDS        | 1447531 | 1447743 | +                | -                 | hypothetical protein                                         |
| G2583_1392 | pseudogene | 1447733 | 1448198 | +                | -                 | hypothetical protein                                         |
| G2583_1393 | CDS        | 1447965 | 1448198 | +                | -                 | hypothetical protein                                         |
| G2583_1394 | CDS        | 1448191 | 1448424 | +                | -                 | hypothetical protein                                         |
| G2583_1395 | CDS        | 1448430 | 1448729 | +                | -                 | hypothetical protein                                         |
| G2583_1396 | CDS        | 1448726 | 1450126 | +                | YabA              | Bacteriophage P4 DNA primase                                 |
| G2583_1397 | CDS        | 1450327 | 1450578 | +                | -                 | hypothetical bacteriophage protein                           |
| G2583_1398 | CDS        | 1450575 | 1450985 | +                | -                 | Single-stranded DNA-binding protein                          |
| G2583_1399 | CDS        | 1451871 | 1452077 | +                | -                 | hypothetical protein                                         |
| G2583_1400 | CDS        | 1452077 | 1453132 | +                | -                 | Major capsid protein                                         |
| G2583_1401 | CDS        | 1453145 | 1453480 | +                | -                 | Capsid protein small subunit                                 |
| G2583_1402 | CDS        | 1453493 | 1453906 | +                | -                 | hypothetical protein                                         |
| G2583_1403 | CDS        | 1454127 | 1454654 | +                | -                 | Phage DNA packaging protein NU1-like protein                 |
| G2583_1404 | CDS        | 1454910 | 1455191 | +                | -                 | Hypothetical bacteriophage protein                           |
| G2583_1405 | CDS        | 1455793 | 1457253 | -                | phoQ              | sensor protein PhoQ                                          |
| G2583_1406 | CDS        | 1457253 | 1457924 | -                | phoP              | DNA-binding response regulator in two-component regulatory   |
| G2583_1407 | CDS        | 1458093 | 1459463 | -                | purB              | Adenylosuccinate lyase                                       |
| G2583_1408 | CDS        | 1459467 | 1460108 | -                | hflD              | hypothetical protein                                         |
| G2583_1409 | CDS        | 1460144 | 1461250 | -                | mnmA              | Predicted tRNA(5-methylaminomethyl-2-thiouridylate)          |
| G2583_1410 | CDS        | 1461304 | 1461765 | -                | nudJ              | Phosphatase nudJ                                             |
| G2583_1411 | CDS        | 1461775 | 1462428 | -                | rluE              | Ribosomal large subunit pseudouridine synthase E             |
| G2583_1412 | CDS        | 1462600 | 1463850 | +                | icd               | Isocitrate dehydrogenase [NADP]                              |
| G2583_1413 | CDS        | 1463953 | 1464276 | -                | elbA              | Anti-adapter protein iraM                                    |
| G2583_1414 | CDS        | 1464972 | 1465376 | -                | ycgX              | hypothetical protein                                         |
| G2583_1415 | CDS        | 1465597 | 1466328 | -                | ycgE              | transcriptional regulator mlrA                               |
| G2583_1416 | CDS        | 1466533 | 1467009 | -                | ycgF              | BLUF domain/cyclic diguanylate phosphodiesterase (EAL)       |
| G2583_1417 | CDS        | 1467006 | 1467818 | -                | ycgF              | BLUF domain/cyclic diguanylate phosphodiesterase (EAL)       |
| G2583_1418 | CDS        | 1468054 | 1468290 | +                | ycgZ              | hypothetical protein                                         |
| G2583_1419 | CDS        | 1468267 | 1468440 | -                | -                 | hypothetical protein                                         |
| G2583_1420 | CDS        | 1468333 | 1468605 | +                | yngA              | hypothetical protein                                         |
| G2583_1421 | CDS        | 1468634 | 1468900 | +                | yngB              | hypothetical protein                                         |
| G2583_1422 | CDS        | 1469013 | 1469261 | +                | yngC              | hypothetical protein                                         |
| G2583_1423 | CDS        | 1469597 | 1471120 | +                | ycgG              | Cyclic diguanylate phosphodiesterase (EAL) domain protein    |
| G2583_1424 | CDS        | 1471252 | 1471470 | +                | yngF              | hypothetical protein                                         |
| G2583_1425 | CDS        | 1471587 | 1471706 | +                | -                 | hypothetical protein                                         |
| G2583_1426 | CDS        | 1471870 | 1472847 | +                | -                 | Porin, autotransporter (AT) family                           |
| G2583_1427 | CDS        | 1472896 | 1474512 | +                | -                 | Porin, autotransporter (AT) family                           |
| G2583_1428 | CDS        | 1474568 | 1474903 | -                | yngD              | hypothetical protein                                         |
| G2583_1429 | CDS        | 1474907 | 1475251 | -                | -                 | hypothetical protein                                         |
| G2583_1430 | CDS        | 1475253 | 1475426 | -                | yngI              | hypothetical protein                                         |
| G2583_1431 | CDS        | 1475527 | 1475712 | +                | yngJ              | hypothetical protein                                         |
| G2583_1432 | CDS        | 1475857 | 1479135 | +                | ypjA              | Putative ATP-binding component of a transport system         |
| G2583_1433 | CDS        | 1479507 | 1479773 | -                | minE              | Cell division topological specificity factor                 |
| G2583_1434 | CDS        | 1479777 | 1480589 | -                | minD              | Septum site-determining protein minD                         |
| G2583_1435 | CDS        | 1480613 | 1481308 | -                | minC              | Septum site-determining protein minC                         |
| G2583_1436 | CDS        | 1481828 | 1482196 | +                | ycgJ              | Putative fels-1 Prophage Protein                             |
| G2583_1437 | CDS        | 1482299 | 1482700 | -                | ycgK              | Bacterial pre-peptidase C-terminal domain protein            |
| G2583_1438 | CDS        | 1482729 | 1482929 | +                | -                 | hypothetical protein                                         |
| G2583_1439 | CDS        | 1482908 | 1483234 | +                | ycgL              | hypothetical protein                                         |
| G2583_1440 | CDS        | 1483306 | 1483965 | +                | ycgM              | Fumarylacetoacetate hydrolase family protein                 |



| Locus_tag  | Type  | Start   | End     | +/- <sup>a</sup> | Gene <sup>b</sup> | Product                                                     |
|------------|-------|---------|---------|------------------|-------------------|-------------------------------------------------------------|
| G2583_1441 | CDS   | 1484042 | 1484503 | +                | ycgN              | conserved hypothetical protein                              |
| G2583_1442 | CDS   | 1484710 | 1485627 | -                | hlyE              | Hemolysin E                                                 |
| G2583_1443 | ncRNA | 1485856 | 1485934 | +                | -                 | ncRNA                                                       |
| G2583_1444 | CDS   | 1485994 | 1486413 | +                | umuD              | DNA polymerase V subunit UmuD                               |
| G2583_1445 | CDS   | 1486413 | 1487681 | +                | umuC              | DNA polymerase V subunit UmuC                               |
| G2583_1446 | CDS   | 1487727 | 1488257 | -                | dsbB              | Disulfide bond formation protein B                          |
| G2583_1447 | CDS   | 1488403 | 1489944 | -                | nhaB              | Na(+)/H(+) antiporter nhaB                                  |
| G2583_1448 | CDS   | 1490166 | 1490885 | +                | fadR              | Fatty acid metabolism regulator protein                     |
| G2583_1449 | CDS   | 1490937 | 1492469 | -                | ycgB              | SpoVR family protein                                        |
| G2583_1450 | CDS   | 1492800 | 1494098 | +                | dadA              | D-amino acid dehydrogenase small subunit                    |
| G2583_1451 | CDS   | 1494108 | 1495178 | +                | dadX              | Alanine racemase, catabolic                                 |
| G2583_1452 | CDS   | 1495347 | 1496789 | -                | ipaH              | hypothetical protein                                        |
| G2583_1453 | CDS   | 1497181 | 1497336 | +                | -                 | hypothetical protein                                        |
| G2583_1454 | CDS   | 1497439 | 1499175 | -                | cvrA              | potassium/proton antiporter                                 |
| G2583_1455 | CDS   | 1499271 | 1500185 | -                | ldcA              | Muramoyltetrapeptide carboxypeptidase                       |
| G2583_1456 | CDS   | 1500285 | 1500896 | +                | emtA              | Membrane-bound lytic murein transglycosylase E              |
| G2583_1457 | CDS   | 1500898 | 1501632 | -                | ycgR              | hypothetical protein                                        |
| G2583_1458 | CDS   | 1501833 | 1502087 | +                | yngE              | hypothetical protein                                        |
| G2583_1459 | CDS   | 1502137 | 1504107 | -                | prfA              | Putative TonB dependent outer membrane receptor             |
| G2583_1460 | CDS   | 1504133 | 1504987 | -                | modD              | Putative pyrophosphorylase modD                             |
| G2583_1461 | CDS   | 1504984 | 1505796 | -                | -                 | Putative methyltransferase                                  |
| G2583_1462 | CDS   | 1505806 | 1506564 | -                | -                 | Putative iron compound ABC transporter, ATP-binding protein |
| G2583_1463 | CDS   | 1506561 | 1507541 | -                | -                 | Putative iron compound ABC transporter, permease protein    |
| G2583_1464 | CDS   | 1507541 | 1508563 | -                | -                 | Putative iron compound ABC transporter, periplasmic-binding |
| G2583_1465 | CDS   | 1508671 | 1508871 | -                | -                 | hypothetical protein                                        |
| G2583_1466 | CDS   | 1508899 | 1510356 | -                | treA              | putative trehalase                                          |
| G2583_1467 | CDS   | 1510218 | 1510583 | -                | treA              | trehalase                                                   |
| G2583_1468 | CDS   | 1510903 | 1512324 | -                | dhaM              | Putative PTS system enzyme I                                |
| G2583_1469 | CDS   | 1512332 | 1512964 | -                | dhaL              | Putative dihydroxyacetone kinase                            |
| G2583_1470 | CDS   | 1512975 | 1514075 | -                | dhaK              | Dihydroxyacetone kinase, N-terminal domain                  |
| G2583_1471 | CDS   | 1514273 | 1516192 | +                | dhaR              | PTS-dependent dihydroxyacetone kinase operon regulatory     |
| G2583_1472 | CDS   | 1516292 | 1519177 | -                | ycgV              | putative outer membrane autotransporter                     |
| G2583_1473 | CDS   | 1519522 | 1519725 | +                | -                 | hypothetical protein                                        |
| G2583_1474 | CDS   | 1520021 | 1521112 | -                | ychF              | GTP-dependent nucleic acid-binding protein engD             |
| G2583_1475 | CDS   | 1521229 | 1521813 | -                | pth               | Peptidyl-tRNA hydrolase                                     |
| G2583_1476 | CDS   | 1522091 | 1522369 | +                | ychH              | predicted inner membrane protein                            |
| G2583_1477 | CDS   | 1522424 | 1524103 | -                | ychM              | Putative sulfate transporter ychM                           |
| G2583_1478 | CDS   | 1524228 | 1525175 | -                | prs               | Ribose-phosphate pyrophosphokinase                          |
| G2583_1479 | CDS   | 1525326 | 1526177 | -                | ispE              | 4-diphosphocytidyl-2-C-methyl-D-erythritol kinase (CMK) (4- |
| G2583_1480 | CDS   | 1526177 | 1526800 | -                | lolB              | Outer membrane lipoprotein LolB                             |
| G2583_1481 | CDS   | 1527014 | 1528270 | +                | hemA              | Glutamyl-tRNA reductase                                     |
| G2583_1482 | CDS   | 1528312 | 1529394 | +                | prfA              | Peptide chain release factor 1                              |
| G2583_1483 | CDS   | 1529394 | 1530227 | +                | prnC              | Protein-(Glutamine-N5) methyltransferase, release factor-   |
| G2583_1484 | CDS   | 1530224 | 1530616 | +                | ychQ              | Putative Invasion gene expression up-regulator SirB         |
| G2583_1485 | CDS   | 1530620 | 1531429 | +                | ychA              | putative transcriptional regulator                          |
| G2583_1486 | CDS   | 1531465 | 1532319 | +                | kdsA              | 2-dehydro-3-deoxyphosphooctonate aldolase                   |
| G2583_1487 | CDS   | 1532467 | 1532601 | -                | ldrB              | hypothetical protein                                        |
| G2583_1488 | CDS   | 1533515 | 1534615 | -                | chaA              | Calcium/proton antiporter                                   |
| G2583_1489 | CDS   | 1534885 | 1535115 | +                | chaB              | Cation transport regulator chaB                             |
| G2583_1490 | CDS   | 1535252 | 1535971 | +                | chaC              | Cation transport regulator                                  |
| G2583_1491 | CDS   | 1536015 | 1536368 | -                | ychN              | hypothetical protein                                        |
| G2583_1492 | CDS   | 1536518 | 1537948 | +                | ychO              | Putative invasin                                            |
| G2583_1493 | CDS   | 1537949 | 1538599 | -                | narL              | Nitrate/nitrite response regulator protein narL             |
| G2583_1494 | CDS   | 1538592 | 1540388 | -                | narX              | Nitrate/nitrite sensor protein NarX                         |
| G2583_1495 | CDS   | 1540414 | 1540632 | +                | -                 | hypothetical protein                                        |
| G2583_1496 | CDS   | 1540727 | 1542118 | +                | narK              | Nitrite extrusion protein 1                                 |
| G2583_1497 | CDS   | 1542511 | 1546254 | +                | narG              | Nitrate reductase, alpha subunit                            |
| G2583_1498 | CDS   | 1546251 | 1547789 | +                | narH              | Nitrate reductase, beta subunit                             |
| G2583_1499 | CDS   | 1547786 | 1548496 | +                | narJ              | Respiratory nitrate reductase 1 delta chain                 |
| G2583_1500 | CDS   | 1548496 | 1549173 | +                | narI              | Respiratory nitrate reductase, gamma subunit                |

| Locus_tag  | Type  | Start   | End     | +/- <sup>a</sup> | Gene <sup>b</sup> | Product                                                      |
|------------|-------|---------|---------|------------------|-------------------|--------------------------------------------------------------|
| G2583_1502 | ncRNA | 1549357 | 1549527 | -                | -                 | ncRNA                                                        |
| G2583_1503 | tRNA  | 1549534 | 1549620 | -                | -                 | Tyr tRNA                                                     |
| G2583_1504 | ncRNA | 1549654 | 1549823 | -                | -                 | ncRNA                                                        |
| G2583_1505 | tRNA  | 1549828 | 1549914 | -                | -                 | Tyr tRNA                                                     |
| G2583_1506 | CDS   | 1550073 | 1550915 | -                | purU              | Formyltetrahydrofolate deformylase                           |
| G2583_1507 | CDS   | 1550965 | 1551423 | -                | ychJ              | SEC-C motif domain protein                                   |
| G2583_1508 | CDS   | 1551497 | 1552441 | +                | rssA              | Phospholipase, patatin family                                |
| G2583_1509 | CDS   | 1552533 | 1553546 | +                | rssB              | response regulator of RpoS                                   |
| G2583_1510 | CDS   | 1553748 | 1554656 | +                | galU              | UTP--glucose-1-phosphate uridylyltransferase                 |
| G2583_1511 | CDS   | 1554800 | 1555213 | -                | hns               | DNA-binding protein H-NS                                     |
| G2583_1512 | CDS   | 1555817 | 1556434 | +                | tdk               | Thymidine kinase                                             |
| G2583_1513 | CDS   | 1556735 | 1559410 | -                | adhE              | Aldehyde-alcohol dehydrogenase                               |
| G2583_1514 | CDS   | 1559887 | 1560534 | +                | ychE              | Integral membrane protein, MarC family                       |
| G2583_1515 | CDS   | 1561227 | 1562903 | +                | oppA              | Periplasmic oligopeptide-binding protein                     |
| G2583_1516 | CDS   | 1562989 | 1563909 | +                | oppB              | Oligopeptide transport system permease protein oppB          |
| G2583_1517 | CDS   | 1563924 | 1564832 | +                | oppC              | Oligopeptide transport system permease protein oppC          |
| G2583_1518 | CDS   | 1564844 | 1565857 | +                | oppD              | Oligopeptide ABC transporter, ATP-binding protein OppD       |
| G2583_1519 | CDS   | 1565854 | 1566858 | +                | oppF              | Oligopeptide ABC transporter, ATP-binding protein OppF       |
| G2583_1520 | CDS   | 1566911 | 1567240 | -                | yciU              | hypothetical protein                                         |
| G2583_1521 | CDS   | 1567275 | 1568735 | -                | cls               | Cardiolipin synthetase                                       |
| G2583_1522 | CDS   | 1568767 | 1569051 | +                | yciY              | hypothetical protein                                         |
| G2583_1523 | CDS   | 1569106 | 1570359 | -                | kch               | Potassium channel protein kch                                |
| G2583_1524 | CDS   | 1570660 | 1570956 | -                | yciI              | Uncharacterized protein conserved in bacteria                |
| G2583_1525 | CDS   | 1571180 | 1571899 | +                | tonB              | outer membrane receptor-mediated transport energizer protein |
| G2583_1526 | CDS   | 1571939 | 1572337 | -                | yciA              | Acyl-CoA thioester hydrolase yciA                            |
| G2583_1527 | CDS   | 1572442 | 1572981 | -                | yciB              | Probable intracellular septation protein                     |
| G2583_1528 | CDS   | 1573011 | 1573754 | -                | yciC              | UPF0259 membrane protein yciC                                |
| G2583_1529 | CDS   | 1574111 | 1574749 | +                | ompW              | Outer membrane protein W                                     |
| G2583_1530 | CDS   | 1574630 | 1575913 | -                | intE              | Putative integrase for prophage CP-9330                      |
| G2583_1531 | CDS   | 1575891 | 1576139 | -                | xisE              | Excisionase                                                  |
| G2583_1532 | CDS   | 1576204 | 1578654 | -                | exoO              | putative exonuclease                                         |
| G2583_1533 | CDS   | 1578747 | 1578947 | -                | ydfD              | unknown protein encoded by prophage CP-9330                  |
| G2583_1534 | CDS   | 1578935 | 1579228 | -                | dicB              | Putative regulator of cell division encoded by prophage CP-  |
| G2583_1535 | ncRNA | 1579298 | 1579348 | -                | dicF4             | ncRNA                                                        |
| G2583_1536 | CDS   | 1579682 | 1579915 | +                | -                 | unknown protein encoded by prophage CP-9330                  |
| G2583_1537 | CDS   | 1579893 | 1580300 | -                | -                 | unknown protein encoded by prophage CP-9330                  |
| G2583_1538 | CDS   | 1580323 | 1580541 | -                | ydfC              | unknown protein encoded by prophage CP-9330                  |
| G2583_1539 | CDS   | 1580614 | 1580970 | -                | -                 | hypothetical protein                                         |
| G2583_1540 | CDS   | 1581178 | 1581585 | -                | dicA              | Similar to DicA, regulator of DicB encoded by prophage CP-   |
| G2583_1541 | CDS   | 1581662 | 1581889 | +                | dicC              | DNA-binding transcriptional regulator DicC                   |
| G2583_1542 | CDS   | 1581873 | 1582424 | +                | -                 | unknown protein encoded by prophage CP-9330                  |
| G2583_1543 | CDS   | 1582396 | 1583436 | +                | -                 | unknown protein encoded by prophage CP-9330                  |
| G2583_1544 | CDS   | 1583225 | 1583890 | +                | -                 | unknown protein encoded by prophage CP-9330                  |
| G2583_1545 | CDS   | 1583924 | 1584658 | +                | -                 | hypothetical protein EcolO15_16731                           |
| G2583_1546 | CDS   | 1584788 | 1585099 | +                | papH              | putative fimbrial minor pilin protein precursor              |
| G2583_1547 | CDS   | 1585518 | 1586276 | +                | paa               | Porcine attaching-effacing associated protein                |
| G2583_1548 | CDS   | 1586555 | 1586767 | +                | gef               | Putative killer protein encoded by prophage CP-9330          |
| G2583_1549 | CDS   | 1586989 | 1587246 | +                | rem               | hypothetical protein                                         |
| G2583_1550 | CDS   | 1587316 | 1587594 | +                | -                 | hypothetical protein                                         |
| G2583_1551 | CDS   | 1587596 | 1588651 | +                | -                 | hypothetical protein                                         |
| G2583_1552 | CDS   | 1588652 | 1589017 | +                | -                 | Holliday junction resolvase                                  |
| G2583_1553 | CDS   | 1589014 | 1589703 | +                | -                 | Antitermination protein Q                                    |
| G2583_5267 | tRNA  | 1589899 | 1589974 | +                | -                 | Met tRNA                                                     |
| G2583_5268 | tRNA  | 1590065 | 1590141 | +                | -                 | Arg tRNA                                                     |
| G2583_1554 | CDS   | 1590556 | 1591056 | -                | -                 | hypothetical protein                                         |
| G2583_1555 | CDS   | 1591008 | 1591193 | +                | -                 | hypothetical protein                                         |
| G2583_1556 | CDS   | 1591222 | 1593072 | +                | -                 | hypothetical protein                                         |
| G2583_1557 | CDS   | 1593351 | 1593512 | -                | -                 | hypothetical protein                                         |
| G2583_1558 | CDS   | 1593520 | 1593726 | +                | -                 | Putative lysis protein S of prophage CP-933V                 |
| G2583_1559 | CDS   | 1593726 | 1594223 | +                | ybcS              | lysozyme-like protein                                        |

| Locus_tag  | Type | Start   | End     | +/- <sup>a</sup> | Gene <sup>b</sup> | Product                                                    |
|------------|------|---------|---------|------------------|-------------------|------------------------------------------------------------|
| G2583_1560 | CDS  | 1594208 | 1594687 | +                | ycbT              | Bacteriophage lysis protein                                |
| G2583_1561 | CDS  | 1594770 | 1594910 | +                | -                 | hypothetical protein                                       |
| G2583_1562 | CDS  | 1595152 | 1595466 | +                | -                 | Putative transcriptional regulator                         |
| G2583_1563 | CDS  | 1595548 | 1595772 | -                | -                 | unknown protein encoded within prophage CP-933R            |
| G2583_1564 | CDS  | 1595814 | 1596344 | +                | -                 | unknown protein encoded by prophage CP-933N                |
| G2583_1565 | CDS  | 1596460 | 1597023 | +                | -                 | Phage terminase, small subunit                             |
| G2583_1566 | CDS  | 1597020 | 1598681 | +                | -                 | Phage terminase-like protein, large subunit                |
| G2583_1567 | CDS  | 1598745 | 1598864 | +                | -                 | Phage head maturation protease                             |
| G2583_1568 | CDS  | 1598885 | 1599232 | +                | insN              | unknown protein encoded by IS911 within prophage CP-933L   |
| G2583_1569 | CDS  | 1599445 | 1600098 | +                | -                 | putative transposase                                       |
| G2583_1570 | CDS  | 1600201 | 1601943 | +                | -                 | Phage head maturation protease                             |
| G2583_1571 | CDS  | 1601988 | 1602209 | +                | -                 | conserved hypothetical protein                             |
| G2583_1572 | CDS  | 1604736 | 1605062 | +                | -                 | conserved hypothetical protein                             |
| G2583_1573 | CDS  | 1605073 | 1605423 | +                | -                 | Bacteriophage head-tail adaptor                            |
| G2583_1574 | CDS  | 1605420 | 1605866 | +                | -                 | Phage protein, HK97 gp10 family                            |
| G2583_1575 | CDS  | 1605863 | 1606207 | +                | -                 | unknown protein encoded by prophage CP-933N                |
| G2583_1576 | CDS  | 1606274 | 1606990 | +                | -                 | Putative major tail subunit                                |
| G2583_1577 | CDS  | 1606996 | 1607370 | +                | -                 | Phage tail assembly chaperone                              |
| G2583_1578 | CDS  | 1607394 | 1607675 | +                | -                 | putative tail protein                                      |
| G2583_1579 | CDS  | 1607727 | 1610993 | +                | -                 | putative tail length tape measure protein                  |
| G2583_1580 | CDS  | 1610986 | 1611327 | +                | -                 | minor tail protein                                         |
| G2583_1581 | CDS  | 1611327 | 1612025 | +                | -                 | Phage-related protein                                      |
| G2583_1582 | CDS  | 1611898 | 1612779 | +                | -                 | Putative tail fiber component                              |
| G2583_1583 | CDS  | 1612677 | 1613354 | +                | -                 | putative tail assembly protein                             |
| G2583_1584 | CDS  | 1613595 | 1617071 | +                | -                 | putative host specificity protein                          |
| G2583_1585 | CDS  | 1617153 | 1618199 | -                | insF              | IS911 transposase orfB                                     |
| G2583_1586 | CDS  | 1618019 | 1618366 | -                | insN              | unknown protein encoded by IS911 within prophage CP-933L   |
| G2583_1587 | CDS  | 1618496 | 1619023 | +                | -                 | Opacity protein and related surface antigens               |
| G2583_1588 | CDS  | 1619082 | 1620401 | +                | -                 | hypothetical protein                                       |
| G2583_1589 | CDS  | 1620893 | 1621435 | +                | -                 | conserved hypothetical protein                             |
| G2583_1590 | CDS  | 1621584 | 1621991 | -                | -                 | NleA8-2 protein                                            |
| G2583_1591 | CDS  | 1622647 | 1623387 | -                | -                 | putative integrase                                         |
| G2583_1592 | CDS  | 1623813 | 1624724 | +                | nleH              | Non-LEE-encoded type III effector H                        |
| G2583_1593 | CDS  | 1624790 | 1625359 | +                | nleF              | hypothetical protein                                       |
| G2583_1594 | CDS  | 1625693 | 1626040 | -                | -                 | Putative transposase within CP-933O                        |
| G2583_1595 | CDS  | 1627643 | 1627759 | +                | yciD              | Putative outer membrane protein                            |
| G2583_1596 | CDS  | 1627819 | 1628325 | -                | yciE              | YciE protein                                               |
| G2583_1597 | CDS  | 1628371 | 1628892 | -                | yciF              | YciF protein                                               |
| G2583_1598 | CDS  | 1628957 | 1629160 | -                | yciG              | hypothetical protein                                       |
| G2583_1599 | CDS  | 1629517 | 1630323 | -                | trpA              | Tryptophan synthase alpha chain                            |
| G2583_1600 | CDS  | 1630323 | 1631516 | -                | trpB              | Tryptophan synthase beta chain                             |
| G2583_1601 | CDS  | 1631528 | 1632889 | -                | trpC              | bifunctional indole-3-glycerol phosphate                   |
| G2583_1602 | CDS  | 1632890 | 1634485 | -                | trpD              | Anthranilate synthase, component II                        |
| G2583_1603 | CDS  | 1634485 | 1636047 | -                | trpE              | anthranilate synthase component I                          |
| G2583_1604 | CDS  | 1636139 | 1636183 | -                | trpL              | trp operon leader peptide                                  |
| G2583_1605 | CDS  | 1636321 | 1637202 | +                | trpH              | Putative phosphoesterase                                   |
| G2583_1606 | CDS  | 1637163 | 1637819 | +                | yciO              | hypothetical protein                                       |
| G2583_1607 | CDS  | 1637847 | 1639430 | +                | -                 | conserved hypothetical protein                             |
| G2583_1608 | CDS  | 1639643 | 1640515 | +                | rluB              | Ribosomal large subunit pseudouridine synthase B           |
| G2583_1609 | CDS  | 1640555 | 1641145 | -                | btuR              | Cob(II)yrinic acid a,c-diamide adenosyltransferase         |
| G2583_1610 | CDS  | 1641142 | 1641900 | -                | yciK              | Oxidoreductase, short chain dehydrogenase/reductase family |
| G2583_1611 | CDS  | 1642120 | 1643169 | +                | sohB              | Peptidase, S49 (Protease IV) family                        |
| G2583_1612 | CDS  | 1643205 | 1643456 | -                | yciN              | hypothetical protein                                       |
| G2583_1613 | CDS  | 1643836 | 1646433 | +                | topA              | DNA topoisomerase I                                        |
| G2583_1614 | CDS  | 1646643 | 1647617 | +                | cysB              | transcriptional regulator CysB                             |
| G2583_1615 | CDS  | 1647936 | 1648076 | +                | ymiA              | hypothetical protein                                       |
| G2583_1616 | CDS  | 1648067 | 1648246 | +                | yciX              | hypothetical protein                                       |
| G2583_1617 | CDS  | 1648619 | 1651294 | +                | acnA              | Aconitate hydratase 1                                      |
| G2583_1618 | CDS  | 1651358 | 1651948 | -                | ribA              | GTP cyclohydrolase-2                                       |
| G2583_1619 | CDS  | 1652118 | 1652882 | +                | pgpB              | Phosphatidylglycerophosphatase B                           |

| Locus_tag  | Type       | Start   | End     | +/- <sup>a</sup> | Gene <sup>b</sup> | Product                                                       |
|------------|------------|---------|---------|------------------|-------------------|---------------------------------------------------------------|
| G2583_1620 | CDS        | 1653031 | 1653339 | +                | yciS              | hypothetical protein                                          |
| G2583_1621 | CDS        | 1653346 | 1654515 | +                | yciM              | hypothetical protein                                          |
| G2583_1622 | CDS        | 1654708 | 1655445 | +                | pyrF              | Orotidine 5'-phosphate decarboxylase                          |
| G2583_1623 | CDS        | 1655442 | 1655771 | +                | yciH              | Putative translation initiation factor SUI1                   |
| G2583_1624 | CDS        | 1655897 | 1656115 | -                | osmB              | hypothetical protein                                          |
| G2583_1625 | CDS        | 1656384 | 1657133 | -                | yciT              | putative DEOR-type transcriptional regulator                  |
| G2583_1626 | CDS        | 1657223 | 1657405 | -                | yciZ              | UPF0509 protein yciZ                                          |
| G2583_1627 | CDS        | 1657544 | 1659529 | -                | gmr               | sensory box-containing diguanylate cyclase/cyclic diguanylate |
| G2583_1628 | CDS        | 1659764 | 1661698 | -                | rnb               | Exoribonuclease 2                                             |
| G2583_1629 | CDS        | 1661766 | 1662893 | -                | yciW              | Putative oxidoreductase                                       |
| G2583_1630 | CDS        | 1663037 | 1663825 | -                | fabI              | Enoyl-[acyl-carrier-protein] reductase [NADH]                 |
| G2583_1631 | CDS        | 1664162 | 1664548 | -                | -                 | hypothetical protein                                          |
| G2583_1632 | CDS        | 1664303 | 1664869 | +                | eefR              | Putative transcriptional repressor                            |
| G2583_1633 | CDS        | 1665018 | 1666139 | +                | eefA              | Acriflavine resistance protein A                              |
| G2583_1634 | CDS        | 1666139 | 1669228 | +                | -                 | putative multidrug-efflux transport protein                   |
| G2583_1635 | CDS        | 1669251 | 1670624 | +                | eefC              | Multidrug efflux outer membrane protein EefC                  |
| G2583_1636 | CDS        | 1670633 | 1671796 | +                | eefD              | Multidrug efflux transport protein EefD                       |
| G2583_1637 | CDS        | 1671848 | 1672654 | -                | sapF              | Peptide transport system, ATP-binding protein SapF            |
| G2583_1638 | CDS        | 1672656 | 1673648 | -                | sapD              | Peptide transport system ATP-binding protein sapD             |
| G2583_1639 | CDS        | 1673648 | 1674538 | -                | sapC              | Peptide ABC transporter, permease protein SapC                |
| G2583_1640 | CDS        | 1674525 | 1675490 | -                | sapB              | Peptide transport system permease protein sapB                |
| G2583_1641 | CDS        | 1675487 | 1677130 | -                | sapA              | peptide transport periplasmic protein                         |
| G2583_1642 | CDS        | 1677443 | 1677688 | -                | ymjA              | hypothetical protein                                          |
| G2583_1643 | CDS        | 1677822 | 1679207 | -                | puuP              | Putative amino acid/amine transport protein                   |
| G2583_1644 | CDS        | 1679510 | 1681006 | -                | puuA              | Putative glutamine synthetase                                 |
| G2583_1645 | CDS        | 1681128 | 1681904 | +                | puuD              | Gamma-glutamyl-gamma-aminobutyrate hydrolase                  |
| G2583_1646 | CDS        | 1681931 | 1682488 | +                | puuR              | DNA-binding transcriptional repressor                         |
| G2583_1647 | CDS        | 1682638 | 1684125 | +                | puuC              | Gamma-glutamyl-gamma-aminobutyraldehyde dehydrogenase         |
| G2583_1648 | CDS        | 1684127 | 1685407 | +                | puuB              | Gamma-glutamylputrescine oxidoreductase                       |
| G2583_1649 | CDS        | 1685445 | 1686710 | +                | puuE              | 4-aminobutyrate transaminase                                  |
| G2583_1650 | CDS        | 1686841 | 1687818 | -                | pspF              | Psp operon transcriptional activator                          |
| G2583_1651 | CDS        | 1687985 | 1688653 | +                | pspA              | Phage shock protein                                           |
| G2583_1652 | CDS        | 1688707 | 1688931 | +                | pspB              | Phage shock protein B                                         |
| G2583_1653 | CDS        | 1688931 | 1689290 | +                | pspC              | Phage shock protein C                                         |
| G2583_1654 | CDS        | 1689299 | 1689520 | +                | pspD              | Phage shock protein                                           |
| G2583_1655 | CDS        | 1689595 | 1689909 | +                | pspE              | Phage shock protein E                                         |
| G2583_1656 | pseudogene | 1690119 | 1691797 | +                | ycjM              | Alpha amylase family protein                                  |
| G2583_1657 | CDS        | 1691811 | 1693103 | +                | ycjN              | Sugar-binding periplasmic protein                             |
| G2583_1658 | CDS        | 1693124 | 1694005 | +                | ycjO              | Putative sugar ABC transporter, permease protein              |
| G2583_1659 | CDS        | 1693992 | 1694834 | +                | ycjP              | Binding-protein-dependent transport system inner membrane     |
| G2583_1660 | CDS        | 1694865 | 1695917 | +                | ycjQ              | Oxidoreductase, zinc-binding dehydrogenase family             |
| G2583_1661 | CDS        | 1695935 | 1696723 | +                | ycjR              | AP endonuclease, family 2                                     |
| G2583_1662 | CDS        | 1696733 | 1697788 | +                | ycjS              | Gfo/idh/mocA family                                           |
| G2583_1663 | CDS        | 1697785 | 1700052 | +                | ycjT              | glycosyl hydrolase, family 65                                 |
| G2583_1664 | CDS        | 1700049 | 1700708 | +                | ycjU              | Beta-phosphoglucomutase                                       |
| G2583_1665 | CDS        | 1700722 | 1701804 | +                | ycjV              | Uncharacterized ABC transporter ATP-binding protein ycjV      |
| G2583_1666 | CDS        | 1701849 | 1702754 | +                | ompG              | Outer membrane protein G                                      |
| G2583_1667 | CDS        | 1702865 | 1703863 | -                | ycjW              | putative LACI-type transcriptional regulator                  |
| G2583_1668 | CDS        | 1704018 | 1705415 | +                | ycjX              | putative enzyme                                               |
| G2583_1669 | CDS        | 1705412 | 1706473 | +                | ycjF              | UPF0283 membrane protein ycjF                                 |
| G2583_1670 | CDS        | 1706621 | 1708162 | +                | tyrR              | DNA-binding transcriptional dual regulator, tyrosine-binding  |
| G2583_1671 | CDS        | 1708206 | 1708712 | -                | tpx               | Thiol peroxidase                                              |
| G2583_1672 | CDS        | 1708831 | 1709796 | +                | ycjG              | Mandelate racemase/muconate lactonizing enzyme family         |
| G2583_1673 | CDS        | 1709771 | 1710559 | -                | mpaA              | murein peptide amidase A                                      |
| G2583_1674 | CDS        | 1710790 | 1711440 | -                | ymjC              | NmrA family protein                                           |
| G2583_1675 | CDS        | 1711449 | 1712381 | -                | -                 | hypothetical protein                                          |
| G2583_1676 | CDS        | 1712381 | 1713313 | -                | ycjY              | hypothetical protein                                          |
| G2583_1677 | CDS        | 1713439 | 1714338 | +                | ycjZ              | putative transcriptional regulator LYSR-type                  |
| G2583_1678 | CDS        | 1714653 | 1716287 | +                | mppA              | Putative transport periplasmic protein                        |
| G2583_1679 | CDS        | 1716338 | 1717369 | -                | ynal              | MscS family inner membrane protein ynal                       |

| Locus_tag  | Type  | Start   | End     | +/- <sup>a</sup> | Gene <sup>b</sup> | Product                                                           |
|------------|-------|---------|---------|------------------|-------------------|-------------------------------------------------------------------|
| G2583_1680 | CDS   | 1717613 | 1717870 | +                | ynaJ              | hypothetical protein                                              |
| G2583_1681 | CDS   | 1717920 | 1718870 | -                | uspE              | Universal stress protein E                                        |
| G2583_1682 | CDS   | 1719022 | 1719774 | -                | fnr               | Fumarate and nitrate reduction regulatory protein                 |
| G2583_1683 | CDS   | 1719969 | 1720484 | -                | ogt               | Methylated-DNA-[protein]-cysteine S-methyltransferase             |
| G2583_1684 | CDS   | 1720495 | 1722027 | -                | abgT              | Aminobenzoyl-glutamate transport protein                          |
| G2583_1685 | CDS   | 1722058 | 1723503 | -                | abgB              | Aminobenzoyl-glutamate utilization protein B                      |
| G2583_1686 | CDS   | 1723503 | 1724813 | -                | abgA              | Aminobenzoyl-glutamate utilization protein A                      |
| G2583_1687 | CDS   | 1724989 | 1725897 | +                | abgR              | putative DNA-binding transcriptional regulator                    |
| G2583_1688 | ncRNA | 1725878 | 1726057 | +                | -                 | ncRNA                                                             |
| G2583_1689 | CDS   | 1726227 | 1726790 | +                | ydaL              | Smr domain protein                                                |
| G2583_1690 | CDS   | 1726811 | 1728103 | -                | ydaM              | hypothetical protein                                              |
| G2583_1691 | CDS   | 1728298 | 1729281 | +                | ydaN              | Zinc transport protein zntB                                       |
| G2583_1692 | ncRNA | 1729611 | 1729685 | +                | -                 | ncRNA                                                             |
| G2583_1693 | CDS   | 1729759 | 1731132 | +                | dbpA              | ATP-independent RNA helicase DbpA                                 |
| G2583_1694 | CDS   | 1731261 | 1732196 | -                | ttcA              | C32 tRNA thiolase                                                 |
| G2583_1695 | CDS   | 1732248 | 1733483 | -                | intR              | Putative integrase for prophage CP-933R                           |
| G2583_1696 | CDS   | 1733485 | 1733724 | -                | ydaQ              | hypothetical protein                                              |
| G2583_1697 | CDS   | 1733800 | 1734060 | -                | ydaC              | hypothetical protein                                              |
| G2583_1698 | CDS   | 1734026 | 1734175 | -                | lar               | Restriction alleviation and modification enhancement protein      |
| G2583_1699 | CDS   | 1734231 | 1735040 | -                | recT              | Recombinase, DNA renaturation protein encoded by prophage         |
| G2583_1700 | CDS   | 1735033 | 1737705 | -                | recE              | Putative exodeoxyribonuclease VIII of prophage CP-933R            |
| G2583_1701 | CDS   | 1737805 | 1738080 | -                | racC              | Putative bacteriophage protein                                    |
| G2583_1702 | CDS   | 1738155 | 1738331 | -                | ydaE              | Putative bacteriophage protein                                    |
| G2583_1703 | CDS   | 1738325 | 1738558 | -                | kilR              | Putative cell division inhibitor protein                          |
| G2583_1704 | CDS   | 1738955 | 1739107 | -                | -                 | conserved hypothetical protein                                    |
| G2583_1705 | CDS   | 1739425 | 1739901 | -                | racR              | Rac prophage repressor                                            |
| G2583_1706 | CDS   | 1740025 | 1740282 | +                | ydaS              | putative tail fiber protein                                       |
| G2583_1707 | CDS   | 1740344 | 1740766 | +                | ydaT              | conserved hypothetical protein                                    |
| G2583_1708 | CDS   | 1740844 | 1741632 | +                | ydaU              | hypothetical protein                                              |
| G2583_1709 | CDS   | 1741639 | 1742379 | +                | ydaV              | Putative DNA replication factor encoded by prophage CP-933R       |
| G2583_1710 | CDS   | 1742405 | 1743175 | +                | ydaW              | conserved hypothetical protein                                    |
| G2583_1711 | CDS   | 1743191 | 1743586 | +                | renP              | hypothetical protein                                              |
| G2583_1712 | CDS   | 1743583 | 1744227 | +                | -                 | unknown protein encoded by cryptic prophage CP-933P               |
| G2583_1713 | CDS   | 1744298 | 1744447 | +                | -                 | conserved hypothetical protein                                    |
| G2583_1714 | CDS   | 1744436 | 1744591 | -                | -                 | hypothetical protein                                              |
| G2583_1715 | CDS   | 1744636 | 1744848 | +                | mokP              | Putative cell killing protein encoded within cryptic prophage CP- |
| G2583_1716 | CDS   | 1745200 | 1745337 | +                | -                 | Putative bacteriophage cohesive ends                              |
| G2583_1717 | CDS   | 1745409 | 1746008 | +                | -                 | hypothetical protein                                              |
| G2583_1718 | CDS   | 1746295 | 1746849 | +                | -                 | Putative antitermination protein                                  |
| G2583_5269 | tRNA  | 1746989 | 1747064 | +                | -                 | Met tRNA                                                          |
| G2583_5270 | tRNA  | 1747074 | 1747150 | +                | -                 | Arg tRNA                                                          |
| G2583_5271 | tRNA  | 1747164 | 1747240 | +                | -                 | Arg tRNA                                                          |
| G2583_1719 | CDS   | 1747170 | 1747520 | -                | -                 | unknown protein encoded by prophage CP-933O                       |
| G2583_1720 | CDS   | 1747771 | 1749717 | +                | -                 | YjhS                                                              |
| G2583_1721 | CDS   | 1750075 | 1750347 | +                | -                 | hypothetical protein                                              |
| G2583_1722 | CDS   | 1750424 | 1750639 | +                | -                 | Putative lysis protein S of prophage CP-933V                      |
| G2583_1723 | CDS   | 1750644 | 1751177 | +                | -                 | putative endolysin                                                |
| G2583_1724 | CDS   | 1751146 | 1751262 | +                | -                 | putative endolysin                                                |
| G2583_1725 | CDS   | 1751452 | 1752021 | +                | -                 | Anti-repressor protein Ant                                        |
| G2583_1726 | CDS   | 1752178 | 1752645 | +                | -                 | Endopeptidase                                                     |
| G2583_1727 | CDS   | 1752633 | 1752785 | +                | -                 | hypothetical protein                                              |
| G2583_1728 | CDS   | 1752864 | 1753151 | +                | -                 | hypothetical protein                                              |
| G2583_1729 | CDS   | 1753665 | 1754141 | +                | -                 | conserved hypothetical protein                                    |
| G2583_1730 | CDS   | 1754138 | 1756261 | +                | -                 | Phage terminase large subunit                                     |
| G2583_1731 | CDS   | 1756234 | 1756470 | +                | -                 | hypothetical protein                                              |
| G2583_1732 | CDS   | 1757986 | 1759941 | +                | -                 | Peptidase S14, ClpP                                               |
| G2583_1733 | CDS   | 1760029 | 1760355 | +                | -                 | unknown protein encoded within prophage CP-933U                   |
| G2583_1734 | CDS   | 1760348 | 1760629 | +                | -                 | hypothetical protein                                              |
| G2583_1735 | CDS   | 1760626 | 1761255 | +                | -                 | Putative tail fiber component Z                                   |
| G2583_1736 | CDS   | 1761268 | 1761666 | +                | -                 | putative tail fiber component U of prophage CP-933U               |

| Locus_tag  | Type  | Start   | End     | +/- <sup>a</sup> | Gene <sup>b</sup> | Product                                                         |
|------------|-------|---------|---------|------------------|-------------------|-----------------------------------------------------------------|
| G2583_1737 | CDS   | 1761674 | 1762426 | +                | -                 | hypothetical protein                                            |
| G2583_1738 | CDS   | 1762440 | 1762862 | +                | -                 | Minor tail protein G                                            |
| G2583_1739 | CDS   | 1762889 | 1763197 | +                | -                 | Minor tail protein T                                            |
| G2583_1740 | CDS   | 1763232 | 1765886 | +                | -                 | Minor tail protein H                                            |
| G2583_1741 | CDS   | 1765883 | 1766212 | +                | -                 | putative tail component of prophage CP-933O                     |
| G2583_1742 | CDS   | 1766212 | 1766910 | +                | -                 | Phage-related protein                                           |
| G2583_1743 | CDS   | 1766846 | 1767664 | +                | -                 | Putative tail fiber component                                   |
| G2583_1744 | CDS   | 1767562 | 1768242 | +                | -                 | putative tail assembly protein                                  |
| G2583_1745 | CDS   | 1768490 | 1771963 | +                | -                 | Phage-related protein, tail component                           |
| G2583_1746 | CDS   | 1772031 | 1772630 | +                | -                 | Putative outer membrane protein Lom of prophage CP-933O         |
| G2583_1747 | CDS   | 1772689 | 1773924 | +                | -                 | putative tail fiber protein                                     |
| G2583_1748 | CDS   | 1774308 | 1774883 | +                | -                 | unknown protein encoded by prophage CP-933R                     |
| G2583_1749 | CDS   | 1774956 | 1775585 | +                | -                 | unknown protein encoded by prophage CP-933R                     |
| G2583_1750 | CDS   | 1775667 | 1776308 | +                | -                 | unknown protein encoded by prophage CP-933R                     |
| G2583_1751 | CDS   | 1777249 | 1777755 | -                | uspF              | Universal stress protein F                                      |
| G2583_1752 | CDS   | 1777824 | 1778957 | -                | ompN              | Outer membrane protein N                                        |
| G2583_1753 | ncRNA | 1779182 | 1779303 | +                | -                 | ncRNA                                                           |
| G2583_1754 | CDS   | 1779323 | 1782847 | -                | ydbK              | Pyruvate-flavodoxin oxidoreductase                              |
| G2583_1755 | CDS   | 1783121 | 1783387 | +                | ydbJ              | hypothetical protein                                            |
| G2583_1756 | CDS   | 1783384 | 1783806 | -                | hslJ              | Heat shock protein HslJ                                         |
| G2583_1757 | CDS   | 1783917 | 1784906 | -                | ldhA              | D-lactate dehydrogenase                                         |
| G2583_1758 | CDS   | 1785114 | 1787753 | +                | ydbH              | hypothetical protein                                            |
| G2583_1759 | CDS   | 1787750 | 1787935 | +                | ynbE              | hypothetical protein                                            |
| G2583_1760 | CDS   | 1787937 | 1788266 | +                | ydbL              | hypothetical protein                                            |
| G2583_1761 | CDS   | 1788605 | 1788724 | +                | -                 | hypothetical protein                                            |
| G2583_1762 | CDS   | 1788679 | 1791624 | +                | -                 | putative BigA-like protein                                      |
| G2583_1763 | CDS   | 1791844 | 1794303 | +                | -                 | putative outer membrane protein                                 |
| G2583_1764 | CDS   | 1794523 | 1795383 | +                | ydbC              | Oxidoreductase, aldo/keto reductase family                      |
| G2583_1765 | CDS   | 1795441 | 1797753 | +                | ydbD              | hypothetical protein                                            |
| G2583_1766 | CDS   | 1797918 | 1798529 | +                | ynbA              | Phosphatidylglycerophosphate synthase                           |
| G2583_1767 | CDS   | 1798529 | 1799425 | +                | ynbB              | Phosphatidate cytidyltransferase                                |
| G2583_1768 | CDS   | 1799441 | 1801198 | +                | ynbC              | hypothetical protein                                            |
| G2583_1769 | CDS   | 1801212 | 1802504 | +                | ynbD              | hypothetical protein                                            |
| G2583_1770 | CDS   | 1802555 | 1803160 | -                | azoR              | FMN-dependent NADH-azoreductase                                 |
| G2583_1771 | CDS   | 1803361 | 1807263 | +                | hrpA              | HrpA-like helicases                                             |
| G2583_1772 | CDS   | 1807409 | 1807834 | +                | -                 | hypothetical protein                                            |
| G2583_1773 | CDS   | 1807809 | 1808177 | +                | -                 | hypothetical protein                                            |
| G2583_1774 | CDS   | 1808164 | 1808595 | +                | -                 | hypothetical protein                                            |
| G2583_1775 | CDS   | 1808720 | 1809097 | +                | -                 | hypothetical protein                                            |
| G2583_1776 | CDS   | 1809213 | 1810013 | +                | ydcF              | hypothetical protein                                            |
| G2583_1777 | CDS   | 1810210 | 1811649 | +                | aldA              | Aldehyde dehydrogenase A                                        |
| G2583_1778 | CDS   | 1811691 | 1812692 | -                | gapC              | Glyceraldehyde-3-phosphate dehydrogenase C                      |
| G2583_1779 | CDS   | 1812845 | 1813411 | +                | cybB              | Nickel-dependent hydrogenase, b-type cytochrome subunit         |
| G2583_1780 | ncRNA | 1813422 | 1813485 | -                | -                 | ncRNA                                                           |
| G2583_1781 | CDS   | 1813656 | 1813829 | +                | ydcA              | hypothetical protein                                            |
| G2583_1782 | CDS   | 1813941 | 1814108 | -                | mokB              | hypothetical protein                                            |
| G2583_1783 | CDS   | 1814449 | 1816089 | +                | trg               | Methyl-accepting chemotaxis protein III, ribose sensor receptor |
| G2583_1784 | CDS   | 1816127 | 1817191 | -                | ydcI              | putative transcriptional regulator LYSR-type                    |
| G2583_1785 | CDS   | 1817267 | 1818610 | +                | ydcJ              | hypothetical protein                                            |
| G2583_1786 | CDS   | 1818835 | 1820490 | +                | mdoD              | Glucans biosynthesis protein D precursor                        |
| G2583_1787 | CDS   | 1820411 | 1820614 | -                | -                 | hypothetical protein                                            |
| G2583_1788 | CDS   | 1820630 | 1820854 | +                | ydcH              | hypothetical protein                                            |
| G2583_1789 | CDS   | 1820917 | 1821453 | +                | rimL              | Ribosomal-protein-serine acetyltransferase                      |
| G2583_1790 | CDS   | 1821448 | 1822428 | -                | ydcK              | hypothetical protein                                            |
| G2583_1791 | CDS   | 1822552 | 1823544 | +                | tehA              | Tellurite resistance protein tehA                               |
| G2583_1792 | CDS   | 1823541 | 1824134 | +                | tehB              | Tellurite resistance protein TehB                               |
| G2583_1793 | CDS   | 1824438 | 1825106 | +                | ydcL              | Uncharacterized lipoprotein ydcL precursor                      |
| G2583_1794 | CDS   | 1825141 | 1826370 | -                | ydcO              | hypothetical protein                                            |
| G2583_1795 | CDS   | 1826405 | 1826941 | +                | ydcN              | DNA-binding protein                                             |
| G2583_1796 | CDS   | 1826972 | 1828975 | +                | ydcP              | Peptidase, U32 family                                           |

| Locus_tag  | Type       | Start   | End     | +/- <sup>a</sup> | Gene <sup>b</sup> | Product                                                          |
|------------|------------|---------|---------|------------------|-------------------|------------------------------------------------------------------|
| G2583_1797 | CDS        | 1829067 | 1829297 | -                | yncJ              | hypothetical protein                                             |
| G2583_1798 | CDS        | 1829483 | 1829680 | -                | -                 | hypothetical protein                                             |
| G2583_1799 | CDS        | 1829720 | 1830157 | +                | ydcQ              | Predicted DNA-binding transcriptional regulator                  |
| G2583_1800 | CDS        | 1830236 | 1831642 | +                | ydcR              | multi modular; putative transcriptional regulator; also putative |
| G2583_1801 | CDS        | 1831887 | 1833032 | +                | ydcS              | ABC transporter, periplasmic substrate-binding protein           |
| G2583_1802 | CDS        | 1833050 | 1834063 | +                | ydcT              | ABC transporter, ATP-binding protein                             |
| G2583_1803 | CDS        | 1834064 | 1835005 | +                | ydcU              | ABC transporter, permease protein                                |
| G2583_1804 | CDS        | 1834995 | 1835813 | +                | ydcV              | Putative transport system permease protein                       |
| G2583_1805 | CDS        | 1835803 | 1837227 | +                | ydcW              | Gamma-aminobutyraldehyde dehydrogenase                           |
| G2583_1806 | CDS        | 1837566 | 1837787 | +                | ydcX              | hypothetical protein                                             |
| G2583_1807 | CDS        | 1837873 | 1838106 | +                | ydcY              | hypothetical protein                                             |
| G2583_1808 | CDS        | 1838107 | 1838556 | -                | ydcZ              | hypothetical protein                                             |
| G2583_1809 | CDS        | 1838553 | 1839134 | -                | yncA              | Acetyltransferase, GNAT family                                   |
| G2583_1810 | CDS        | 1839252 | 1840289 | +                | yncB              | Putative NADP-dependent oxidoreductase yncB                      |
| G2583_1811 | CDS        | 1840430 | 1841152 | +                | yncC              | putative DNA-binding transcriptional regulator                   |
| G2583_1812 | CDS        | 1841188 | 1843290 | -                | yncD              | TonB-dependent receptor                                          |
| G2583_1813 | CDS        | 1843532 | 1844593 | +                | yncE              | Uncharacterized conserved protein                                |
| G2583_1814 | CDS        | 1844708 | 1846258 | -                | ansP              | L-asparagine permease                                            |
| G2583_1815 | CDS        | 1846474 | 1847091 | +                | yncG              | putative transferase                                             |
| G2583_1816 | CDS        | 1847167 | 1847379 | +                | yncH              | conserved hypothetical protein                                   |
| G2583_1817 | CDS        | 1847792 | 1847938 | -                | -                 | hypothetical protein                                             |
| G2583_1818 | CDS        | 1848164 | 1850308 | +                | vgrE              | unknown protein associated with Rhs element                      |
| G2583_1819 | pseudogene | 1850375 | 1854577 | +                | rhsE              | protein rhsE                                                     |
| G2583_1820 | CDS        | 1854774 | 1854983 | +                | -                 | DsORF-e4                                                         |
| G2583_1821 | CDS        | 1855050 | 1855199 | +                | -                 | unknown protein associated with Rhs element                      |
| G2583_1822 | pseudogene | 1855491 | 1856652 | +                | ydcC              | H repeat-associated protein                                      |
| G2583_1823 | CDS        | 1856712 | 1856978 | +                | pptA              | Probable tautomerase ydcE                                        |
| G2583_1824 | CDS        | 1856982 | 1857551 | -                | yddH              | hypothetical protein                                             |
| G2583_1825 | CDS        | 1857724 | 1858569 | +                | nhoA              | Putative N-hydroxyarylamine O-acetyltransferase                  |
| G2583_1826 | CDS        | 1858665 | 1859558 | -                | yddE              | Uncharacterized isomerase yddE                                   |
| G2583_1827 | CDS        | 1859637 | 1860317 | -                | narV              | Nitrate reductase 2, gamma subunit                               |
| G2583_1828 | CDS        | 1860314 | 1861009 | -                | narW              | Nitrate reductase molybdenum cofactor assembly chaperone 2       |
| G2583_1829 | CDS        | 1861009 | 1862553 | -                | narY              | Nitrate reductase 2, beta subunit                                |
| G2583_1830 | CDS        | 1862550 | 1866290 | -                | narZ              | Nitrate reductase 2, alpha subunit                               |
| G2583_1831 | CDS        | 1866372 | 1867760 | -                | narU              | Nitrite extrusion protein 2                                      |
| G2583_1832 | CDS        | 1868066 | 1869325 | -                | yddJ              | Leucine-rich repeat protein                                      |
| G2583_1833 | CDS        | 1869388 | 1870056 | -                | -                 | hypothetical protein                                             |
| G2583_1834 | CDS        | 1870143 | 1870646 | -                | -                 | hypothetical protein                                             |
| G2583_1835 | CDS        | 1870815 | 1871915 | -                | -                 | Gram-negative porin family                                       |
| G2583_1836 | CDS        | 1872174 | 1873055 | -                | yddG              | hypothetical protein                                             |
| G2583_1837 | pseudogene | 1873287 | 1876334 | +                | fdnG              | nitrate-inducible formate dehydrogenase-N alpha subunit          |
| G2583_1838 | CDS        | 1876347 | 1877231 | +                | fdnH              | Formate dehydrogenase, nitrate-inducible, iron-sulfur subunit    |
| G2583_1839 | CDS        | 1877224 | 1877877 | +                | fdnI              | Formate dehydrogenase-N gamma subunit                            |
| G2583_1840 | CDS        | 1877927 | 1878289 | -                | yddM              | hypothetical protein                                             |
| G2583_1841 | CDS        | 1878357 | 1879367 | -                | adhP              | Zn-dependent alcohol dehydrogenases                              |
| G2583_1842 | CDS        | 1879501 | 1881225 | -                | maeA              | NAD-dependent malic enzyme                                       |
| G2583_1843 | CDS        | 1881355 | 1881492 | -                | sra               | Stationary-phase-induced ribosome-associated protein             |
| G2583_1844 | CDS        | 1881594 | 1881809 | -                | bdm               | biofilm-dependent modulation protein                             |
| G2583_1845 | CDS        | 1882154 | 1882585 | +                | osmC              | Peroxiredoxin OsmC                                               |
| G2583_1846 | CDS        | 1882641 | 1883567 | -                | ddpF              | Putative ABC transport system ATP-binding protein                |
| G2583_1847 | CDS        | 1883560 | 1884546 | -                | ddpD              | ABC transporter, ATP-binding protein                             |
| G2583_1848 | CDS        | 1884543 | 1885439 | -                | ddpC              | Inner membrane ABC transporter permease protein YddQ             |
| G2583_1849 | CDS        | 1885436 | 1886458 | -                | ddpB              | Binding-protein-dependent transport systems inner membrane       |
| G2583_1850 | CDS        | 1886460 | 1888010 | -                | ddpA              | Putative ABC transporter periplasmic-binding protein yddS        |
| G2583_1851 | CDS        | 1888024 | 1888605 | -                | ddpX              | D-alanyl-D-alanine dipeptidase                                   |
| G2583_1852 | CDS        | 1888863 | 1891286 | -                | dos               | FOG: PAS/PAC domain                                              |
| G2583_1853 | CDS        | 1891287 | 1892669 | -                | yddV              | Diguanylate cyclase yddV                                         |
| G2583_1854 | CDS        | 1893046 | 1894365 | -                | yddW              | Uncharacterized lipoprotein yddW precursor                       |
| G2583_1855 | CDS        | 1894496 | 1896031 | -                | gadC              | Probable glutamate/gamma-aminobutyrate antiporter                |
| G2583_1856 | CDS        | 1896187 | 1897587 | -                | gadB              | Glutamate decarboxylase beta                                     |

| Locus_tag  | Type       | Start   | End     | +/- <sup>a</sup> | Gene <sup>b</sup> | Product                                                    |
|------------|------------|---------|---------|------------------|-------------------|------------------------------------------------------------|
| G2583_1857 | CDS        | 1897949 | 1900744 | -                | pqqL              | Putative peptidase                                         |
| G2583_1858 | CDS        | 1900789 | 1903161 | -                | yddB              | TonB-dependent receptor                                    |
| G2583_1859 | CDS        | 1903199 | 1904884 | -                | yddA              | Inner membrane ABC transporter ATP-binding protein         |
| G2583_1860 | CDS        | 1905175 | 1906347 | -                | ydeM              | Putative enzyme                                            |
| G2583_1861 | CDS        | 1906384 | 1908099 | -                | ydeN              | Putative sulfatase                                         |
| G2583_1862 | CDS        | 1908470 | 1909231 | -                | ydeO              | transcriptional regulator YdeO                             |
| G2583_1863 | CDS        | 1909305 | 1909502 | -                | -                 | Two-component-system connector protein yneN                |
| G2583_1864 | CDS        | 1909750 | 1912029 | -                | ydeP              | putative oxidoreductase major subunit                      |
| G2583_1865 | CDS        | 1912363 | 1913277 | -                | ydeQ              | transcriptional regulator BoIA                             |
| G2583_1866 | CDS        | 1913337 | 1913840 | -                | ydeR              | Uncharacterized fimbrial-like protein ydeR precursor       |
| G2583_1867 | CDS        | 1913853 | 1914383 | -                | ydeS              | biofilm-dependent modulation protein                       |
| G2583_1868 | CDS        | 1914397 | 1917048 | -                | fimD              | Fimbrial usher family protein                              |
| G2583_1869 | CDS        | 1917090 | 1917809 | -                | FimC              | P pilus assembly protein, chaperone PapD                   |
| G2583_1870 | CDS        | 1918161 | 1918724 | -                | fmlA              | Putative Fml fimbriae subunit                              |
| G2583_1871 | CDS        | 1919158 | 1919412 | -                | yneL              | Putative ARAC-type regulatory protein                      |
| G2583_1872 | CDS        | 1919699 | 1921021 | -                | hipA              | regulator with hipB                                        |
| G2583_1873 | CDS        | 1921021 | 1921287 | -                | hipB              | transcriptional regulator HipB                             |
| G2583_1874 | CDS        | 1921498 | 1922898 | -                | ydeU              | Outer membrane autotransporter barrel domain protein       |
| G2583_1875 | CDS        | 1922895 | 1926926 | -                | ydeK              | hypothetical protein                                       |
| G2583_1876 | CDS        | 1927457 | 1929049 | -                | lsrK              | Carbohydrate kinase FGGY                                   |
| G2583_1877 | CDS        | 1929128 | 1930081 | -                | lsrR              | putative transcriptional regulator, sorC family            |
| G2583_1878 | CDS        | 1930330 | 1931865 | +                | lsrA              | Autoinducer-2 ABC transporter, ATP-binding protein LsrA    |
| G2583_1879 | CDS        | 1931859 | 1932887 | +                | lsrC              | Autoinducer-2 ABC transporter, permease protein LsrC       |
| G2583_1880 | CDS        | 1932887 | 1933879 | +                | lsrD              | Autoinducer-2 ABC transporter, permease protein LsrD       |
| G2583_1881 | CDS        | 1933891 | 1934913 | +                | lsrB              | Autoinducer-2 ABC transporter, periplasmic autoinducer-2-  |
| G2583_1882 | CDS        | 1934940 | 1935815 | +                | lsrF              | Uncharacterized aldolase yneB                              |
| G2583_1883 | CDS        | 1935839 | 1936129 | +                | lsrG              | autoinducer-2 (AI-2) modifying protein LsrG                |
| G2583_1884 | CDS        | 1936186 | 1936944 | +                | tam               | Trans-aconitate 2-methyltransferase                        |
| G2583_1885 | CDS        | 1936948 | 1937913 | -                | yneE              | hypothetical protein                                       |
| G2583_1886 | CDS        | 1938059 | 1939510 | -                | uxaB              | Altronate oxidoreductase                                   |
| G2583_1887 | CDS        | 1939737 | 1941155 | -                | yneF              | Diguanylate cyclase (GGDEF) domain protein                 |
| G2583_1888 | CDS        | 1941294 | 1941653 | -                | yneG              | hypothetical protein                                       |
| G2583_1889 | CDS        | 1941653 | 1942579 | -                | yneH              | Glutaminase 2                                              |
| G2583_1890 | CDS        | 1942643 | 1944055 | -                | ynel              | NAD-dependent aldehyde dehydrogenases                      |
| G2583_1891 | CDS        | 1944132 | 1945013 | +                | yneJ              | putative transcriptional regulator LYSR-type               |
| G2583_1892 | pseudogene | 1945091 | 1946206 | +                | yneK              | hypothetical protein                                       |
| G2583_1893 | CDS        | 1946357 | 1947547 | +                | ydeA              | Probable sugar efflux transporter                          |
| G2583_1894 | CDS        | 1947572 | 1948237 | -                | marC              | MarC                                                       |
| G2583_1895 | CDS        | 1948449 | 1948883 | +                | marR              | MarR                                                       |
| G2583_1896 | CDS        | 1948903 | 1949286 | +                | marA              | Multiple antibiotic resistance protein marA                |
| G2583_1897 | CDS        | 1949318 | 1949536 | +                | marB              | Multiple antibiotic resistance protein MarB                |
| G2583_1898 | CDS        | 1949567 | 1950466 | -                | eamA              | Transporter, 10 TMS drug/metabolite exporter (DME) family  |
| G2583_1899 | CDS        | 1950661 | 1951848 | +                | ydeE              | Transporter, major facilitator family                      |
| G2583_1900 | CDS        | 1951889 | 1952284 | -                | -                 | Rhodanese domain protein                                   |
| G2583_1901 | CDS        | 1952367 | 1953350 | +                | frtA              | Transcriptional activator FtrA                             |
| G2583_1902 | CDS        | 1953772 | 1954662 | -                | ydeH              | Diguanylate cyclase                                        |
| G2583_1903 | CDS        | 1954917 | 1955309 | -                | ydeI              | hypothetical protein                                       |
| G2583_1904 | CDS        | 1955585 | 1956103 | +                | ydeJ              | Competence/damage-inducible protein CinA C-terminal domain |
| G2583_1905 | CDS        | 1956148 | 1958193 | -                | dcp               | Peptidyl-dipeptidase Dcp                                   |
| G2583_1906 | CDS        | 1958330 | 1959076 | +                | ydfG              | L-allo-threonine dehydrogenase, NAD(P)-binding protein     |
| G2583_1907 | CDS        | 1959165 | 1959851 | +                | ydfH              | Hypothetical transcriptional regulator ydfH                |
| G2583_1908 | CDS        | 1960028 | 1960231 | +                | ydfZ              | Putative selenoprotein ydfZ                                |
| G2583_1909 | CDS        | 1960267 | 1961727 | -                | ydfI              | Mannitol dehydrogenase family protein                      |
| G2583_1910 | CDS        | 1961834 | 1963099 | -                | ydfJ              | Inner membrane metabolite transport protein ydfJ           |
| G2583_1911 | CDS        | 1963138 | 1963473 | +                | -                 | unknown protein encoded within CP-933O                     |
| G2583_1912 | CDS        | 1963523 | 1964731 | -                | tnpA              | Transposase and inactivated derivatives                    |
| G2583_1913 | CDS        | 1964881 | 1965531 | -                | -                 | unknown protein encoded by prophage CP-933O                |
| G2583_1914 | CDS        | 1965516 | 1965863 | -                | -                 | hypothetical protein                                       |
| G2583_1915 | CDS        | 1965805 | 1965957 | -                | -                 | conserved hypothetical protein                             |
| G2583_1916 | CDS        | 1966242 | 1966817 | -                | -                 | hypothetical protein                                       |



| Locus_tag  | Type | Start   | End     | +/- <sup>a</sup> | Gene <sup>b</sup> | Product                                                           |
|------------|------|---------|---------|------------------|-------------------|-------------------------------------------------------------------|
| G2583_1917 | CDS  | 1967201 | 1968514 | -                | -                 | putative tail fiber protein encoded by prophage CP-933R           |
| G2583_1918 | CDS  | 1968579 | 1969178 | -                | -                 | Enterobacterial Ail/Lom family protein                            |
| G2583_1919 | CDS  | 1969245 | 1969553 | -                | -                 | Host specificity protein J                                        |
| G2583_1920 | CDS  | 1969589 | 1972624 | -                | -                 | Host specificity protein                                          |
| G2583_1921 | CDS  | 1973254 | 1974072 | -                | -                 | Putative tail fiber component K of prophage                       |
| G2583_1922 | CDS  | 1974002 | 1974700 | -                | -                 | minor tail protein                                                |
| G2583_1923 | CDS  | 1974700 | 1975029 | -                | -                 | Minor tail family protein                                         |
| G2583_1924 | CDS  | 1975026 | 1977605 | -                | -                 | putative tail component of prophage CP-933O                       |
| G2583_1925 | CDS  | 1977586 | 1977999 | -                | -                 | hypothetical protein                                              |
| G2583_1926 | CDS  | 1978026 | 1978457 | -                | -                 | phage minor tail protein G                                        |
| G2583_1927 | CDS  | 1978471 | 1979223 | -                | -                 | Bacterial surface proteins containing Ig-like domains             |
| G2583_1928 | CDS  | 1979231 | 1979626 | -                | -                 | hypothetical protein                                              |
| G2583_1929 | CDS  | 1979623 | 1980156 | -                | -                 | hypothetical protein                                              |
| G2583_1930 | CDS  | 1980171 | 1980524 | -                | -                 | hypothetical protein                                              |
| G2583_1931 | CDS  | 1980517 | 1980900 | -                | -                 | conserved hypothetical protein                                    |
| G2583_1932 | CDS  | 1980952 | 1981980 | -                | -                 | phage major capsid protein E                                      |
| G2583_1933 | CDS  | 1982038 | 1982385 | -                | -                 | Bacteriophage lambda head decoration protein D                    |
| G2583_1934 | CDS  | 1982422 | 1983927 | -                | -                 | Periplasmic serine proteases (ClpP class)                         |
| G2583_1935 | CDS  | 1983917 | 1985509 | -                | -                 | Bacteriophage capsid protein                                      |
| G2583_1936 | CDS  | 1985506 | 1985712 | -                | -                 | putative head completion protein                                  |
| G2583_1937 | CDS  | 1985696 | 1987660 | -                | -                 | Putative terminase large subunit of prophage CP-933O              |
| G2583_1938 | CDS  | 1987596 | 1988105 | -                | -                 | Prophage Qin DNA packaging protein NU1-like protein               |
| G2583_1939 | CDS  | 1988227 | 1988334 | -                | nohA              | conserved hypothetical protein                                    |
| G2583_1940 | CDS  | 1988500 | 1988727 | +                | -                 | conserved hypothetical protein                                    |
| G2583_1941 | CDS  | 1989090 | 1989557 | -                | -                 | Putative endopeptidase Rz                                         |
| G2583_1942 | CDS  | 1989711 | 1990280 | -                | antU              | Antirepressor protein                                             |
| G2583_1943 | CDS  | 1990551 | 1991084 | -                | -                 | putative endolysin                                                |
| G2583_1944 | CDS  | 1991135 | 1991479 | -                | -                 | unknown protein encoded by cryptic prophage CP-933P               |
| G2583_1945 | CDS  | 1991484 | 1991699 | -                | -                 | Putative lysis protein S of prophage CP-933V                      |
| G2583_1946 | CDS  | 1991775 | 1992200 | -                | -                 | hypothetical protein                                              |
| G2583_1947 | CDS  | 1992082 | 1992264 | -                | -                 | hypothetical protein                                              |
| G2583_1948 | CDS  | 1992412 | 1994349 | -                | -                 | hypothetical protein                                              |
| G2583_1949 | CDS  | 1994378 | 1994563 | -                | -                 | hypothetical protein                                              |
| G2583_1950 | CDS  | 1994515 | 1995015 | +                | -                 | hypothetical protein                                              |
| G2583_1951 | CDS  | 1995428 | 1996249 | -                | -                 | DnaJ-class molecular chaperone with C-terminal Zn finger          |
| G2583_1952 | CDS  | 1996246 | 1996620 | -                | -                 | Putative endonuclease of cryptic prophage CP-933M                 |
| G2583_1953 | CDS  | 1996633 | 1997679 | -                | -                 | conserved hypothetical protein                                    |
| G2583_1954 | CDS  | 1997681 | 1998040 | -                | -                 | hypothetical protein                                              |
| G2583_1955 | CDS  | 1998127 | 1998339 | -                | -                 | Putative cell killing protein encoded within cryptic prophage CP- |
| G2583_1956 | CDS  | 1998749 | 1999618 | -                | -                 | Eaa protein                                                       |
| G2583_1957 | CDS  | 1999629 | 1999892 | -                | -                 | unknown protein encoded within prophage CP-933R                   |
| G2583_1958 | CDS  | 1999894 | 2000112 | -                | -                 | hypothetical protein                                              |
| G2583_1959 | CDS  | 2000145 | 2000357 | -                | -                 | unknown protein encoded within prophage CP-933R                   |
| G2583_1960 | CDS  | 2000408 | 2000584 | -                | -                 | Putative bacteriophage protein                                    |
| G2583_1961 | CDS  | 2000784 | 2001209 | -                | -                 | Unknown protein encoded within prophage                           |
| G2583_1962 | CDS  | 2001250 | 2002215 | -                | -                 | conserved hypothetical protein                                    |
| G2583_1963 | CDS  | 2002240 | 2002665 | -                | -                 | hypothetical protein                                              |
| G2583_1964 | CDS  | 2002662 | 2002877 | -                | -                 | hypothetical protein                                              |
| G2583_1965 | CDS  | 2002927 | 2003643 | +                | -                 | SOS-response transcriptional repressors (RecA-mediated            |
| G2583_1966 | CDS  | 2003831 | 2004061 | +                | ydaF              | unknown protein encoded by prophage CP-933N                       |
| G2583_1967 | CDS  | 2004176 | 2004925 | -                | -                 | unknown protein encoded by prophage CP-933N                       |
| G2583_1968 | CDS  | 2005144 | 2005428 | +                | dicB              | Putative regulator of cell division encoded by prophage CP-       |
| G2583_1969 | CDS  | 2005425 | 2005628 | +                | -                 | conserved hypothetical protein                                    |
| G2583_1970 | CDS  | 2005708 | 2008179 | +                | ydfE              | Exonuclease family protein                                        |
| G2583_1971 | CDS  | 2008251 | 2008502 | +                | xisP              | Putative phage excisionase protein                                |
| G2583_1972 | CDS  | 2008522 | 2009817 | +                | intQ              | Integrase family protein                                          |
| G2583_1973 | CDS  | 2009843 | 2009947 | -                | YdfJ              | Inner membrane metabolite transport protein ydfJ                  |
| G2583_1974 | CDS  | 2010005 | 2011024 | -                | rspB              | Starvation sensing protein RspB                                   |
| G2583_1975 | CDS  | 2011036 | 2012250 | -                | rspA              | Starvation-sensing protein rspA                                   |
| G2583_1976 | CDS  | 2012456 | 2012782 | -                | ynfA              | UPF0060 membrane protein ynfA                                     |

| Locus_tag  | Type       | Start   | End     | +/- <sup>a</sup> | Gene <sup>b</sup> | Product                                                      |
|------------|------------|---------|---------|------------------|-------------------|--------------------------------------------------------------|
| G2583_1977 | CDS        | 2012917 | 2013258 | +                | ynfB              | UPF0482 protein ynfB precursor                               |
| G2583_1978 | CDS        | 2013293 | 2013853 | +                | speG              | Spermidine N(1)-acetyltransferase                            |
| G2583_1979 | CDS        | 2013856 | 2014602 | -                | ynfC              | hypothetical protein                                         |
| G2583_1980 | CDS        | 2014671 | 2014979 | +                | ynfD              | hypothetical protein                                         |
| G2583_1981 | CDS        | 2015178 | 2017604 | +                | ynfE              | Anaerobic dimethyl sulfoxide reductase, A subunit YnfE       |
| G2583_1982 | CDS        | 2017692 | 2020088 | +                | ynfF              | Anaerobic dimethyl sulfoxide reductase, A subunit, DmsA/YnfE |
| G2583_1983 | CDS        | 2020099 | 2020716 | +                | ynfG              | Probable anaerobic dimethyl sulfoxide reductase chain ynfG   |
| G2583_1984 | CDS        | 2020718 | 2021572 | +                | ynfH              | Oxidoreductase, membrane subunit                             |
| G2583_1985 | CDS        | 2021615 | 2022229 | +                | dmsD              | Twin-arginine leader-binding protein dmsD                    |
| G2583_1986 | CDS        | 2022423 | 2023679 | +                | clcB              | Putative chloride channel                                    |
| G2583_1987 | CDS        | 2023632 | 2024327 | -                | ynfK              | Putative dethiobiotin synthetase                             |
| G2583_1988 | CDS        | 2024452 | 2025672 | -                | dgsA              | putative NAGC-like transcriptional regulator                 |
| G2583_1989 | CDS        | 2025807 | 2026700 | -                | ynfL              | putative transcriptional regulator LYSR-type                 |
| G2583_1990 | CDS        | 2026807 | 2028060 | +                | ynfM              | Major facilitator family transporter                         |
| G2583_1991 | CDS        | 2028478 | 2028792 | +                | asr               | acid shock protein precursor                                 |
| G2583_1992 | CDS        | 2029068 | 2029889 | +                | ydgD              | V8-like Glu-specific endopeptidase                           |
| G2583_1993 | CDS        | 2029928 | 2030257 | -                | mdtI              | multidrug resistance protein MdtI                            |
| G2583_1994 | CDS        | 2030244 | 2030609 | -                | mdtJ              | Spermidine export protein mdtJ                               |
| G2583_1995 | CDS        | 2031021 | 2032055 | +                | tqsA              | Putative permease, PerM family                               |
| G2583_1996 | CDS        | 2032080 | 2033468 | -                | pntB              | NAD(P) transhydrogenase subunit beta                         |
| G2583_1997 | CDS        | 2033479 | 2035065 | -                | pntA              | NAD(P) transhydrogenase, alpha subunit                       |
| G2583_1998 | CDS        | 2035535 | 2036479 | +                | ydgH              | predicted protein                                            |
| G2583_1999 | CDS        | 2036665 | 2038047 | +                | ydgl              | Arginine/ornithine antiporter                                |
| G2583_2000 | CDS        | 2038084 | 2038806 | +                | folM              | Dihydrofolate reductase folM                                 |
| G2583_2001 | CDS        | 2038803 | 2039138 | -                | ydgC              | Inner membrane protein ydgC                                  |
| G2583_2002 | CDS        | 2039258 | 2039986 | +                | rstA              | DNA-binding response regulator in two-component regulatory   |
| G2583_2003 | CDS        | 2039990 | 2041291 | +                | rstB              | Sensor histidine kinase RstB                                 |
| G2583_2004 | CDS        | 2041355 | 2042296 | +                | tus               | DNA replication terminus site-binding protein                |
| G2583_2005 | CDS        | 2042293 | 2043696 | -                | fumC              | Fumarate hydratase class II                                  |
| G2583_2006 | CDS        | 2043839 | 2045485 | -                | fumA              | Fumarate hydratase class I, aerobic                          |
| G2583_2007 | CDS        | 2045684 | 2046859 | +                | manA              | Mannose-6-phosphate isomerase, class I                       |
| G2583_2008 | CDS        | 2046960 | 2048468 | +                | ydgA              | hypothetical protein                                         |
| G2583_2009 | pseudogene | 2048513 | 2049777 | -                | uidC              | membrane-associated protein                                  |
| G2583_2010 | CDS        | 2049816 | 2051189 | -                | uidB              | Glucuronide permease uidB                                    |
| G2583_2011 | CDS        | 2051186 | 2052997 | -                | uidA              | Beta-glucuronidase                                           |
| G2583_2012 | CDS        | 2053388 | 2053978 | -                | uidR              | repressor for uid operon                                     |
| G2583_2013 | CDS        | 2054207 | 2054974 | -                | hdhA              | 7-alpha-hydroxysteroid dehydrogenase                         |
| G2583_2014 | CDS        | 2055086 | 2056114 | -                | mall              | Maltose regulon regulatory protein Mall                      |
| G2583_2015 | CDS        | 2056289 | 2057881 | +                | malX              | PTS system, maltose and glucose-specific IIABC component     |
| G2583_2016 | CDS        | 2057891 | 2059063 | +                | malY              | Maltose regulon modulator MalY                               |
| G2583_2017 | CDS        | 2059167 | 2060168 | +                | add               | Adenosine deaminase                                          |
| G2583_2018 | CDS        | 2060204 | 2061244 | -                | ydgJ              | Oxidoreductase, NAD-binding                                  |
| G2583_2019 | CDS        | 2061487 | 2061612 | +                | blr               | Beta-lactam resistance protein                               |
| G2583_2020 | CDS        | 2061885 | 2062100 | +                | cnu               | OriC-binding nucleoid-associated protein                     |
| G2583_2021 | CDS        | 2062162 | 2062626 | +                | ydgK              | hypothetical protein                                         |
| G2583_2022 | CDS        | 2062703 | 2063284 | +                | rsxA              | Electron transport complex protein rnfA                      |
| G2583_2023 | CDS        | 2063284 | 2063862 | +                | rsxB              | Electron transport complex protein rnfB                      |
| G2583_2024 | CDS        | 2063855 | 2066173 | +                | rsxC              | Electron transport complex protein RnfC                      |
| G2583_2025 | CDS        | 2066174 | 2067232 | +                | rsxD              | Electron transport complex protein rnfD                      |
| G2583_2026 | CDS        | 2067236 | 2067856 | +                | rsxG              | Electron transport complex protein rnfG                      |
| G2583_2027 | CDS        | 2067860 | 2068555 | +                | rsxE              | Predicted NADH:ubiquinone oxidoreductase, subunit RnfE       |
| G2583_2028 | CDS        | 2068555 | 2069190 | +                | nth               | Endonuclease III (DNA-(apurinic or apyrimidinic site) lyase) |
| G2583_2029 | CDS        | 2069801 | 2071303 | +                | tppB              | Tripeptide permease tppB                                     |
| G2583_2030 | CDS        | 2071409 | 2072014 | +                | gst               | Glutathione S-transferase                                    |
| G2583_2031 | CDS        | 2072058 | 2072921 | -                | pdxY              | Pyridoxamine kinase                                          |
| G2583_2032 | CDS        | 2072980 | 2074266 | -                | tyrS              | Tyrosyl-tRNA synthetase                                      |
| G2583_2033 | CDS        | 2074383 | 2075039 | -                | pdxH              | Pyridoxine/pyridoxamine 5'-phosphate oxidase                 |
| G2583_2034 | CDS        | 2075098 | 2075427 | -                | ydhA              | predicted lipoprotein                                        |
| G2583_2035 | CDS        | 2075525 | 2076634 | -                | anmK              | Anhydro-N-acetylmuramic acid kinase                          |
| G2583_2036 | CDS        | 2076907 | 2077374 | +                | slyB              | Outer membrane lipoprotein slyB precursor                    |

| Locus_tag  | Type  | Start   | End     | +/- <sup>a</sup> | Gene <sup>b</sup> | Product                                                 |
|------------|-------|---------|---------|------------------|-------------------|---------------------------------------------------------|
| G2583_2037 | CDS   | 2077421 | 2077855 | -                | slyA              | Transcriptional regulators                              |
| G2583_2038 | CDS   | 2078056 | 2078292 | +                | ydhI              | hypothetical protein                                    |
| G2583_2039 | CDS   | 2078253 | 2079152 | +                | ydhJ              | hypothetical protein                                    |
| G2583_2040 | CDS   | 2079152 | 2081164 | +                | ydhK              | Uncharacterized transporter ydhK                        |
| G2583_2041 | CDS   | 2081165 | 2081686 | -                | sodC              | Superoxide dismutase [Cu-Zn]                            |
| G2583_2042 | CDS   | 2081767 | 2082663 | -                | ydhF              | Oxidoreductase ydhF                                     |
| G2583_2043 | CDS   | 2082712 | 2083089 | -                | ydhL              | hypothetical protein                                    |
| G2583_2044 | CDS   | 2083054 | 2083653 | +                | ydhM              | hypothetical protein                                    |
| G2583_2045 | CDS   | 2083690 | 2084787 | +                | nemA              | N-ethylmaleimide reductase                              |
| G2583_2046 | CDS   | 2084868 | 2085275 | +                | gloA              | Lactoylglutathione lyase                                |
| G2583_2047 | CDS   | 2085378 | 2086025 | +                | rnt               | Ribonuclease T                                          |
| G2583_2048 | CDS   | 2086118 | 2090734 | +                | lhr               | DEAD/DEAH box helicase family protein Lhr               |
| G2583_2049 | CDS   | 2090785 | 2091132 | -                | grxD              | Glutaredoxin-4                                          |
| G2583_2050 | CDS   | 2091467 | 2092282 | +                | ydhO              | NlpC/P60 family protein                                 |
| G2583_2051 | CDS   | 2092410 | 2092991 | +                | sodB              | Superoxide dismutase [Fe]                               |
| G2583_2052 | CDS   | 2093137 | 2094306 | -                | ydhP              | predicted transporter                                   |
| G2583_2053 | CDS   | 2094861 | 2095886 | +                | purR              | DNA-binding transcriptional repressor PurR              |
| G2583_2054 | CDS   | 2095883 | 2096815 | -                | ydhB              | putative DNA-binding transcriptional regulator          |
| G2583_2055 | CDS   | 2096928 | 2098139 | +                | ydhC              | Drug resistance transporter, Bcr/CflA subfamily         |
| G2583_2056 | CDS   | 2098430 | 2099578 | +                | cfa               | Cyclopropane-fatty-acyl-phospholipid synthase           |
| G2583_2057 | CDS   | 2099618 | 2100259 | -                | ribC              | Riboflavin synthase alpha chain                         |
| G2583_2058 | CDS   | 2100474 | 2101847 | +                | mdtK              | Multidrug resistance protein mdtK                       |
| G2583_2059 | CDS   | 2101888 | 2103144 | -                | ydhQ              | hypothetical protein                                    |
| G2583_2060 | tRNA  | 2103451 | 2103529 | +                | -                 | Val tRNA                                                |
| G2583_2061 | tRNA  | 2103532 | 2103610 | +                | -                 | Val tRNA                                                |
| G2583_2062 | CDS   | 2103717 | 2104022 | +                | ydhR              | Protein ydhR                                            |
| G2583_2063 | CDS   | 2104148 | 2105752 | +                | ydhS              | hypothetical protein                                    |
| G2583_2064 | CDS   | 2105764 | 2106576 | -                | ydhT              | hypothetical protein                                    |
| G2583_2065 | CDS   | 2106580 | 2107365 | -                | ydhU              | Nickel-dependent hydrogenase, b-type cytochrome subunit |
| G2583_2066 | CDS   | 2107362 | 2108081 | -                | ydhX              | Uncharacterized ferredoxin-like protein ydhX            |
| G2583_2067 | CDS   | 2108094 | 2108741 | -                | ydhW              | hypothetical protein                                    |
| G2583_2068 | CDS   | 2108745 | 2110847 | -                | ydhV              | hypothetical protein                                    |
| G2583_2069 | CDS   | 2110868 | 2111494 | -                | ydhY              | Uncharacterized ferredoxin-like protein ydhY            |
| G2583_2070 | CDS   | 2111950 | 2112159 | -                | ydhZ              | hypothetical protein                                    |
| G2583_2071 | CDS   | 2112500 | 2114128 | +                | pykF              | Pyruvate kinase I                                       |
| G2583_2072 | CDS   | 2114439 | 2114675 | +                | lpp               | Major outer membrane lipoprotein precursor              |
| G2583_2073 | CDS   | 2114738 | 2115742 | -                | ynhG              | LysM domain/ErkK/YbiS/YcfS/YnhG family protein          |
| G2583_2074 | CDS   | 2115891 | 2116307 | -                | sufE              | Cysteine desulfuration protein sufE                     |
| G2583_2075 | CDS   | 2116320 | 2117540 | -                | sufS              | Cysteine desulfurase                                    |
| G2583_2076 | CDS   | 2117537 | 2118808 | -                | sufD              | FeS assembly protein SufD                               |
| G2583_2077 | CDS   | 2118783 | 2119529 | -                | sufC              | FeS assembly ATPase SufC                                |
| G2583_2078 | CDS   | 2119539 | 2121065 | -                | sufB              | cysteine desulfurase activator complex subunit SufB     |
| G2583_2079 | CDS   | 2121035 | 2121403 | -                | sufA              | FeS assembly scaffold SufA                              |
| G2583_2080 | ncRNA | 2121730 | 2121797 | +                | -                 | ncRNA                                                   |
| G2583_2081 | CDS   | 2121952 | 2122221 | -                | ydiH              | hypothetical protein                                    |
| G2583_2082 | CDS   | 2122240 | 2122650 | -                | ydiI              | Esterase YdiI                                           |
| G2583_2083 | CDS   | 2122647 | 2125703 | -                | ydiJ              | Oxidoreductase, FAD-binding                             |
| G2583_2084 | CDS   | 2126092 | 2127204 | +                | ydiK              | Inner membrane protein YdiK                             |
| G2583_2085 | ncRNA | 2127390 | 2127497 | +                | rprA              | ncRNA                                                   |
| G2583_2086 | CDS   | 2127606 | 2127989 | +                | ydiL              | hypothetical protein                                    |
| G2583_2087 | CDS   | 2128089 | 2129294 | +                | ydiM              | Major facilitator family transporter                    |
| G2583_2088 | CDS   | 2129515 | 2130786 | +                | ydiN              | Transporter, major facilitator family                   |
| G2583_2089 | CDS   | 2130798 | 2131664 | +                | ydiB              | Quinate/shikimate dehydrogenase                         |
| G2583_2090 | CDS   | 2131695 | 2132453 | +                | aroD              | 3-dehydroquinate dehydratase                            |
| G2583_2091 | CDS   | 2132598 | 2134193 | +                | ydiF              | Propionate CoA-transferase                              |
| G2583_2092 | CDS   | 2134207 | 2135358 | +                | ydiO              | Acyl-coA dehydrogenase                                  |
| G2583_2093 | CDS   | 2135401 | 2136312 | -                | ydiP              | putative ARAC-type regulatory protein                   |
| G2583_2094 | CDS   | 2136628 | 2137392 | +                | ydiQ              | camphor resistance protein CrcB                         |
| G2583_2095 | CDS   | 2137412 | 2138350 | +                | ydiR              | iron donor protein CyaY                                 |
| G2583_2096 | CDS   | 2138406 | 2139695 | +                | ydiS              | putative sulfate transport protein CysZ                 |

| Locus_tag  | Type | Start   | End     | +/- <sup>a</sup> | Gene <sup>b</sup> | Product                                                    |
|------------|------|---------|---------|------------------|-------------------|------------------------------------------------------------|
| G2583_2097 | CDS  | 2139692 | 2139985 | +                | ydiT              | Iron-sulfur cluster-binding protein                        |
| G2583_2098 | CDS  | 2139988 | 2141688 | +                | fadK              | Putative ligase/synthetase                                 |
| G2583_2099 | CDS  | 2141745 | 2144123 | -                | pps               | Phosphoenolpyruvate synthase                               |
| G2583_2100 | CDS  | 2144456 | 2145289 | +                | ydiA              | Putative phosphotransferase ydiA                           |
| G2583_2101 | CDS  | 2145446 | 2146492 | +                | aroH              | Phospho-2-dehydro-3-deoxyheptonate aldolase, Trp-sensitive |
| G2583_2102 | CDS  | 2146597 | 2146815 | +                | ydiE              | hypothetical protein                                       |
| G2583_2103 | CDS  | 2146819 | 2148255 | -                | ydiU              | UPF0061 protein ydiU                                       |
| G2583_2104 | CDS  | 2148318 | 2149031 | -                | ydiV              | hypothetical protein                                       |
| G2583_2105 | CDS  | 2149278 | 2149742 | -                | nlpC              | Lipoprotein, NlpC/P60 family                               |
| G2583_2106 | CDS  | 2149820 | 2150569 | -                | btuD              | Vitamin B12 import ATP-binding protein btuD                |
| G2583_2107 | CDS  | 2150569 | 2151120 | -                | btuE              | Vitamin B12 transport periplasmic protein btuE             |
| G2583_2108 | CDS  | 2151183 | 2152163 | -                | btuC              | Vitamin B12 import system permease protein btuC            |
| G2583_2109 | CDS  | 2152353 | 2152748 | -                | -                 | hypothetical protein                                       |
| G2583_2110 | CDS  | 2152759 | 2153733 | -                | intT              | integrase                                                  |
| G2583_2111 | CDS  | 2153783 | 2154127 | -                | cl                | gpC                                                        |
| G2583_2112 | CDS  | 2154188 | 2154466 | +                | -                 | hypothetical phage DNA-binding protein                     |
| G2583_2113 | CDS  | 2154481 | 2154819 | +                | -                 | unknown protein encoded by prophage CP-933T                |
| G2583_2114 | CDS  | 2154830 | 2155117 | +                | -                 | hypothetical protein                                       |
| G2583_2115 | CDS  | 2155129 | 2155371 | +                | -                 | hypothetical protein                                       |
| G2583_2116 | CDS  | 2155575 | 2155985 | +                | -                 | hypothetical protein                                       |
| G2583_2117 | CDS  | 2156009 | 2156212 | +                | -                 | hypothetical protein                                       |
| G2583_2118 | CDS  | 2156209 | 2156475 | +                | -                 | hypothetical protein                                       |
| G2583_2119 | CDS  | 2156472 | 2156771 | +                | -                 | conserved hypothetical protein                             |
| G2583_2120 | CDS  | 2156783 | 2157400 | +                | -                 | hypothetical protein                                       |
| G2583_2121 | CDS  | 2157397 | 2157786 | +                | -                 | hypothetical protein                                       |
| G2583_2122 | CDS  | 2157783 | 2160623 | +                | -                 | putative phage replication protein                         |
| G2583_2123 | CDS  | 2160700 | 2161659 | +                | -                 | Molecular chaperone                                        |
| G2583_2124 | CDS  | 2161664 | 2161975 | +                | -                 | hypothetical protein                                       |
| G2583_2125 | CDS  | 2162039 | 2162371 | +                | clpX              | ATP-dependent protease Clp, ATPase subunit                 |
| G2583_2126 | CDS  | 2162368 | 2162706 | +                | -                 | hypothetical protein                                       |
| G2583_2127 | CDS  | 2163198 | 2164244 | -                | gpq               | Putative phage protein                                     |
| G2583_2128 | CDS  | 2164244 | 2165995 | -                | gpP               | Putative phage protein gpP                                 |
| G2583_2129 | CDS  | 2166150 | 2166986 | +                | -                 | putative capsid scaffolding protein                        |
| G2583_2130 | CDS  | 2167010 | 2168062 | +                | gpn               | Predicted major capsid protein                             |
| G2583_2131 | CDS  | 2168108 | 2168908 | +                | gpm               | Putative phage terminase                                   |
| G2583_2132 | CDS  | 2169011 | 2169505 | +                | gpl               | phage head completion protein                              |
| G2583_2133 | CDS  | 2169505 | 2169705 | +                | -                 | Probable phage tail protein                                |
| G2583_2134 | CDS  | 2169708 | 2170031 | +                | -                 | Phosphotransferase system IIC components,                  |
| G2583_2135 | CDS  | 2170028 | 2170420 | +                | -                 | Phage capsid scaffolding protein                           |
| G2583_2136 | CDS  | 2170417 | 2170824 | +                | -                 | hypothetical protein                                       |
| G2583_2137 | CDS  | 2170962 | 2171429 | +                | -                 | Predicted tail completion phage protein                    |
| G2583_2138 | CDS  | 2171413 | 2172057 | +                | gps               | Predicted tail completion phage protein                    |
| G2583_2139 | CDS  | 2172054 | 2172635 | +                | -                 | Phage P2 baseplate assembly protein gpV                    |
| G2583_2140 | CDS  | 2172632 | 2172982 | +                | -                 | Phage baseplate assembly protein                           |
| G2583_2141 | CDS  | 2172986 | 2173882 | +                | -                 | probable phage baseplate assembly protein                  |
| G2583_2142 | CDS  | 2173875 | 2174483 | +                | gpl               | phage tail protein I                                       |
| G2583_2143 | CDS  | 2174480 | 2175835 | +                | -                 | DNA inversion product                                      |
| G2583_2144 | CDS  | 2176674 | 2177045 | +                | -                 | Alternative bacteriophage tail fiber C-terminus            |
| G2583_2145 | CDS  | 2177052 | 2177663 | -                | tfaE              | Tail fiber assembly protein                                |
| G2583_2146 | CDS  | 2177663 | 2178121 | -                | -                 | Sc/SvM1 protein                                            |
| G2583_2147 | CDS  | 2178132 | 2178617 | -                | ycfK              | putative tail fiber protein                                |
| G2583_2148 | CDS  | 2178632 | 2179231 | +                | pin               | DNA-invertase                                              |
| G2583_2149 | CDS  | 2179258 | 2179752 | -                | -                 | Phage protein U                                            |
| G2583_2150 | CDS  | 2179759 | 2182566 | -                | -                 | Phage-related tail protein                                 |
| G2583_2151 | CDS  | 2182553 | 2182789 | -                | -                 | Putative phage tail protein                                |
| G2583_2152 | CDS  | 2182717 | 2183091 | -                | -                 | ABC-type antimicrobial peptide transport system, ATPase    |
| G2583_2153 | CDS  | 2183147 | 2183659 | -                | -                 | Putative tail fiber component of prophage CP-933T          |
| G2583_2154 | CDS  | 2183659 | 2184843 | -                | -                 | Phage tail sheath protein FI                               |
| G2583_2155 | CDS  | 2185001 | 2186110 | +                | gpd               | Phage protein D                                            |
| G2583_2156 | CDS  | 2186467 | 2186970 | +                | -                 | hypothetical protein                                       |

| Locus_tag  | Type | Start   | End     | +/- <sup>a</sup> | Gene <sup>b</sup> | Product                                                        |
|------------|------|---------|---------|------------------|-------------------|----------------------------------------------------------------|
| G2583_2157 | CDS  | 2187120 | 2187380 | +                | -                 | putative phage transcriptional activator, Ogr/Delta            |
| G2583_2158 | CDS  | 2187571 | 2187711 | +                | -                 | conserved hypothetical protein                                 |
| G2583_2159 | CDS  | 2188015 | 2188314 | -                | ihfA              | Integration host factor subunit alpha                          |
| G2583_2160 | CDS  | 2188319 | 2190706 | -                | pheT              | Phenylalanyl-tRNA synthetase beta chain                        |
| G2583_2161 | CDS  | 2190721 | 2191704 | -                | pheS              | Phenylalanyl-tRNA synthetase alpha chain                       |
| G2583_2162 | CDS  | 2191987 | 2192031 | -                | pheM              | phenylalanyl-tRNA synthetase (pheST) operon leader peptide     |
| G2583_2163 | CDS  | 2192154 | 2192510 | -                | rplT              | 50S ribosomal protein L20                                      |
| G2583_2164 | CDS  | 2192563 | 2192760 | -                | rpml              | 50S ribosomal protein L35                                      |
| G2583_2165 | CDS  | 2192857 | 2193291 | -                | infC              | Translation initiation factor IF-3                             |
| G2583_2166 | CDS  | 2193403 | 2195331 | -                | thrS              | Threonyl-tRNA synthetase                                       |
| G2583_2167 | CDS  | 2196198 | 2197751 | +                | arpA              | Ankyrin repeat protein B                                       |
| G2583_2168 | CDS  | 2198086 | 2198844 | -                | ydiY              | hypothetical protein                                           |
| G2583_2169 | CDS  | 2199128 | 2200060 | +                | pfkB              | 6-phosphofructokinase II                                       |
| G2583_2170 | CDS  | 2200161 | 2200451 | +                | ydiZ              | hypothetical protein                                           |
| G2583_2171 | CDS  | 2200557 | 2201417 | +                | yniA              | hypothetical protein                                           |
| G2583_2172 | CDS  | 2201458 | 2201994 | -                | yniB              | hypothetical protein                                           |
| G2583_2173 | CDS  | 2202141 | 2202809 | +                | yniC              | Phosphatase yniC                                               |
| G2583_2174 | CDS  | 2202960 | 2203562 | +                | ydjM              | Inner membrane protein ydjM precursor                          |
| G2583_2175 | CDS  | 2203695 | 2205086 | +                | ydjN              | Sodium:dicarboxylate symporter precursor                       |
| G2583_2176 | CDS  | 2205090 | 2205905 | -                | ydjO              | hypothetical protein                                           |
| G2583_2177 | CDS  | 2206182 | 2206445 | -                | cedA              | Cell division activator cedA                                   |
| G2583_2178 | CDS  | 2206628 | 2208889 | +                | katE              | Catalase HP11                                                  |
| G2583_2179 | CDS  | 2208936 | 2209694 | -                | chbG              | UPF0249 protein chbG                                           |
| G2583_2180 | CDS  | 2209707 | 2211059 | -                | chbF              | Phospho-beta-glucosidase                                       |
| G2583_2181 | CDS  | 2211165 | 2212007 | -                | chbR              | ChbR                                                           |
| G2583_2182 | CDS  | 2212015 | 2212365 | -                | chbA              | N,N'-diacetylchitobiose-specific phosphotransferase enzyme IIA |
| G2583_2183 | CDS  | 2212416 | 2213774 | -                | chbC              | N,N'-diacetylchitobiose permease IIC component                 |
| G2583_2184 | CDS  | 2213859 | 2214179 | -                | chbB              | PTS system, lactose/cellobiose family IIB subunit precursor    |
| G2583_2185 | CDS  | 2214479 | 2214817 | -                | osmE              | Osmotically-inducible lipoprotein E precursor                  |
| G2583_2186 | CDS  | 2215019 | 2215846 | +                | nadE              | NAD synthase                                                   |
| G2583_2187 | CDS  | 2216076 | 2216963 | +                | cho               | Excinuclease cho                                               |
| G2583_2188 | CDS  | 2216923 | 2217561 | -                | ves               | Uncharacterized protein conserved in bacteria                  |
| G2583_2189 | CDS  | 2217701 | 2218186 | -                | spy               | Spy                                                            |
| G2583_2190 | CDS  | 2218516 | 2219484 | -                | astE              | Succinylglutamate desuccinylase                                |
| G2583_2191 | CDS  | 2219477 | 2220820 | -                | astB              | N-succinylarginine dihydrolase                                 |
| G2583_2192 | CDS  | 2220817 | 2222295 | -                | astD              | N-succinylglutamate 5-semialdehyde dehydrogenase               |
| G2583_2193 | CDS  | 2222292 | 2223326 | -                | astA              | Arginine N-succinyltransferase                                 |
| G2583_2194 | CDS  | 2223323 | 2224543 | -                | astC              | Succinylornithine transaminase                                 |
| G2583_2195 | CDS  | 2224989 | 2225795 | +                | xthA              | Exodeoxyribonuclease III                                       |
| G2583_2196 | CDS  | 2225914 | 2226672 | +                | ydjX              | hypothetical protein                                           |
| G2583_2197 | CDS  | 2226515 | 2227354 | +                | ydjY              | hypothetical protein                                           |
| G2583_2198 | CDS  | 2227369 | 2228076 | +                | ydjZ              | hypothetical protein                                           |
| G2583_2199 | CDS  | 2228076 | 2228624 | +                | ynjA              | Carboxymuconolactone decarboxylase family protein              |
| G2583_2200 | CDS  | 2228631 | 2229800 | +                | ynjB              | hypothetical protein                                           |
| G2583_2201 | CDS  | 2229773 | 2231308 | +                | ynjC              | ABC transporter, permease protein                              |
| G2583_2202 | CDS  | 2231308 | 2231961 | +                | ynjD              | Putative ATP-binding component of a transport system           |
| G2583_2203 | CDS  | 2232013 | 2233335 | +                | ynjE              | Putative thiosulfate sulfurtransferase YnjE                    |
| G2583_2204 | CDS  | 2233344 | 2233970 | -                | ynjF              | Putative cytochrome oxidase                                    |
| G2583_2205 | CDS  | 2234051 | 2234458 | +                | nudG              | CTP pyrophosphohydrolase                                       |
| G2583_2206 | CDS  | 2234424 | 2234696 | -                | ynjH              | hypothetical protein                                           |
| G2583_2207 | CDS  | 2234932 | 2236275 | +                | gdhA              | NADP-specific glutamate dehydrogenase                          |
| G2583_2208 | CDS  | 2236392 | 2237432 | -                | ynjI              | hypothetical protein                                           |
| G2583_2209 | CDS  | 2237560 | 2239521 | -                | topB              | DNA topoisomerase III                                          |
| G2583_2210 | CDS  | 2239526 | 2240569 | -                | selD              | Selenide, water dikinase                                       |
| G2583_2211 | CDS  | 2240686 | 2241237 | -                | ydjA              | Protein ydjA                                                   |
| G2583_2212 | CDS  | 2241398 | 2243254 | +                | sppA              | Protease 4                                                     |
| G2583_2213 | CDS  | 2243277 | 2244080 | +                | -                 | hypothetical protein                                           |
| G2583_2214 | CDS  | 2244212 | 2245228 | +                | ansA              | L-asparaginase 1                                               |
| G2583_2215 | CDS  | 2245239 | 2245880 | +                | pncA              | hypothetical protein                                           |
| G2583_2216 | CDS  | 2245973 | 2247331 | -                | ydjE              | Inner membrane metabolite transport protein ydjE               |

| Locus_tag  | Type  | Start   | End     | +/- <sup>a</sup> | Gene <sup>b</sup> | Product                                                          |
|------------|-------|---------|---------|------------------|-------------------|------------------------------------------------------------------|
| G2583_2217 | CDS   | 2247449 | 2248207 | -                | ydjF              | transcriptional regulator, DeoR family                           |
| G2583_2218 | CDS   | 2248344 | 2249324 | -                | ydjG              | Oxidoreductase, aldo/keto reductase family                       |
| G2583_2219 | CDS   | 2249334 | 2250266 | -                | ydjH              | Kinase, pfkB family                                              |
| G2583_2220 | CDS   | 2250271 | 2251107 | -                | ydjI              | Fructose-bisphosphate aldolase, class II family                  |
| G2583_2221 | CDS   | 2251128 | 2252171 | -                | ydjJ              | Sorbitol dehydrogenase                                           |
| G2583_2222 | CDS   | 2252188 | 2252826 | -                | ydjK              | major facilitator family transporter                             |
| G2583_2223 | CDS   | 2252816 | 2253892 | -                | ydjL              | Oxidoreductase, zinc-binding dehydrogenase family                |
| G2583_2224 | CDS   | 2254262 | 2254579 | -                | yeaC              | hypothetical protein                                             |
| G2583_2225 | CDS   | 2254576 | 2254989 | -                | msrB              | Methionine sulfoxide reductase B                                 |
| G2583_2226 | CDS   | 2255331 | 2256326 | +                | gapA              | Glyceraldehyde-3-phosphate dehydrogenase A                       |
| G2583_2227 | CDS   | 2256389 | 2257294 | +                | yeaD              | Aldose 1-epimerase family protein                                |
| G2583_2228 | CDS   | 2257345 | 2258199 | -                | yeaE              | Oxidoreductase, aldo/keto reductase family                       |
| G2583_2229 | CDS   | 2258289 | 2259035 | -                | mipA              | MltA-interacting protein precursor                               |
| G2583_2230 | CDS   | 2259471 | 2261405 | +                | yeaG              | hypothetical protein                                             |
| G2583_2231 | CDS   | 2261518 | 2262801 | +                | yeaH              | UPF0229 protein yeaH                                             |
| G2583_2232 | CDS   | 2263080 | 2264423 | +                | yeaI              | Diguanylate cyclase (GGDEF) domain protein                       |
| G2583_2233 | CDS   | 2264604 | 2266094 | +                | yeaJ              | hypothetical protein                                             |
| G2583_2234 | CDS   | 2266137 | 2266640 | +                | yeaK              | hypothetical protein                                             |
| G2583_2235 | CDS   | 2266641 | 2266793 | -                | -                 | hypothetical protein                                             |
| G2583_2236 | CDS   | 2266915 | 2267361 | +                | yeaL              | Predicted membrane protein                                       |
| G2583_2237 | CDS   | 2267318 | 2268139 | -                | yeaM              | Putative AraC-type regulatory protein                            |
| G2583_2238 | CDS   | 2268236 | 2269417 | +                | yeaN              | inner membrane transport protein yeaN                            |
| G2583_2239 | CDS   | 2269451 | 2269819 | +                | yeaO              | hypothetical protein                                             |
| G2583_2240 | CDS   | 2269841 | 2270095 | -                | yoaF              | hypothetical protein                                             |
| G2583_2241 | CDS   | 2270149 | 2271303 | +                | yeaP              | GAF domain/diguanylate cyclase (GGDEF) domain protein            |
| G2583_2242 | CDS   | 2271570 | 2271818 | -                | yeaQ              | hypothetical protein                                             |
| G2583_2243 | CDS   | 2271965 | 2272147 | -                | yoaG              | Protein yoaG                                                     |
| G2583_2244 | CDS   | 2272151 | 2272510 | -                | yeaR              | hypothetical protein                                             |
| G2583_2245 | CDS   | 2272683 | 2273321 | -                | leuE              | Leucine efflux protein                                           |
| G2583_2246 | CDS   | 2273448 | 2274392 | -                | yeaT              | putative transcriptional regulator LYSR-type                     |
| G2583_2247 | CDS   | 2274474 | 2275559 | +                | yeaU              | Tartrate dehydrogenase/decarboxylase                             |
| G2583_2248 | CDS   | 2275810 | 2277420 | +                | yeaV              | Transporter, betaine/carnitine/choline transporter (BCCT) family |
| G2583_2249 | CDS   | 2277452 | 2278576 | +                | yeaW              | Putative dioxygenase subunit alpha yeaW                          |
| G2583_2250 | CDS   | 2278632 | 2279597 | +                | yeaX              | Putative diogenase beta subunit                                  |
| G2583_2251 | CDS   | 2279651 | 2280778 | -                | rnd               | Ribonuclease D                                                   |
| G2583_2252 | ncRNA | 2280804 | 2280889 | -                | -                 | ncRNA                                                            |
| G2583_2253 | CDS   | 2280848 | 2282533 | -                | fadD              | Long-chain-fatty-acid--CoA ligase                                |
| G2583_2254 | CDS   | 2282738 | 2283319 | -                | yeaY              | Outer membrane protein Slp                                       |
| G2583_2255 | CDS   | 2283359 | 2284054 | -                | yeaZ              | Glycoprotease family protein                                     |
| G2583_2256 | CDS   | 2284112 | 2286022 | -                | yoaA              | Helicase c2                                                      |
| G2583_2257 | CDS   | 2286106 | 2286498 | +                | yoaB              | hypothetical protein                                             |
| G2583_2258 | CDS   | 2286860 | 2287219 | +                | yoaC              | hypothetical protein                                             |
| G2583_2259 | CDS   | 2287339 | 2287518 | -                | yoaH              | UPF0181 protein yoaH                                             |
| G2583_2260 | CDS   | 2287592 | 2288953 | +                | pabB              | p-aminobenzoate synthetase, component I                          |
| G2583_2261 | CDS   | 2288957 | 2289535 | +                | nudL              | Uncharacterized Nudix hydrolase nudL                             |
| G2583_2262 | CDS   | 2289719 | 2291083 | +                | sdaA              | L-serine ammonia-lyase 1                                         |
| G2583_2263 | CDS   | 2291184 | 2292812 | +                | yoaD              | hypothetical protein                                             |
| G2583_2264 | CDS   | 2292816 | 2294372 | -                | yoaE              | UPF0053 inner membrane protein yoaE                              |
| G2583_2265 | CDS   | 2294360 | 2294614 | -                | -                 | putative cytoplasmic protein                                     |
| G2583_2266 | CDS   | 2294835 | 2295806 | +                | manX              | Putative PTS system, mannose-specific component IIB              |
| G2583_2267 | CDS   | 2295869 | 2296669 | +                | manY              | PTS enzyme IIC, mannose-specific                                 |
| G2583_2268 | CDS   | 2296673 | 2297533 | +                | manZ              | Mannose permease IID component                                   |
| G2583_2269 | CDS   | 2297588 | 2298046 | +                | yobD              | UPF0266 membrane protein yobD                                    |
| G2583_2270 | CDS   | 2298422 | 2299042 | +                | yebN              | hypothetical protein                                             |
| G2583_2271 | CDS   | 2299039 | 2299848 | -                | rrmA              | 23S rRNA methyltransferase A                                     |
| G2583_2272 | CDS   | 2300014 | 2300223 | -                | cspC              | hypothetical protein                                             |
| G2583_2273 | CDS   | 2300236 | 2300379 | -                | yobF              | hypothetical protein                                             |
| G2583_2274 | CDS   | 2301048 | 2301335 | -                | yebO              | hypothetical protein                                             |
| G2583_2275 | CDS   | 2301410 | 2301553 | -                | mgrB              | hypothetical protein                                             |
| G2583_2276 | CDS   | 2301713 | 2301952 | +                | yobH              | hypothetical protein                                             |

| Locus_tag  | Type  | Start   | End     | +/- <sup>a</sup> | Gene <sup>b</sup> | Product                                                         |
|------------|-------|---------|---------|------------------|-------------------|-----------------------------------------------------------------|
| G2583_2277 | CDS   | 2302096 | 2302887 | -                | kdgR              | putative regulator                                              |
| G2583_2278 | CDS   | 2302953 | 2304437 | +                | yebQ              | Putative transport protein                                      |
| G2583_2279 | CDS   | 2304483 | 2305364 | -                | htpX              | Probable protease htpX                                          |
| G2583_2280 | CDS   | 2305556 | 2307604 | -                | prc               | C-terminal processing peptidase                                 |
| G2583_2281 | CDS   | 2307624 | 2308322 | -                | proQ              | ProP effector                                                   |
| G2583_2282 | CDS   | 2308419 | 2308970 | -                | yebR              | GAF domain protein                                              |
| G2583_2283 | CDS   | 2309046 | 2310329 | +                | yebS              | hypothetical protein                                            |
| G2583_2284 | CDS   | 2310292 | 2312931 | +                | yebT              | Mce-related protein                                             |
| G2583_2285 | CDS   | 2312931 | 2314451 | +                | rsmF              | Ribosomal RNA small subunit methyltransferase F                 |
| G2583_2286 | CDS   | 2314554 | 2314805 | +                | yebV              | hypothetical protein                                            |
| G2583_2287 | CDS   | 2314826 | 2315101 | +                | yebW              | hypothetical protein                                            |
| G2583_2288 | CDS   | 2315102 | 2315761 | -                | pphA              | Protein phosphatase 1 modulates phosphoproteins, signals        |
| G2583_2289 | ncRNA | 2315855 | 2316103 | +                | -                 | ncRNA                                                           |
| G2583_2290 | ncRNA | 2315893 | 2315992 | -                | -                 | ncRNA                                                           |
| G2583_2291 | CDS   | 2316154 | 2316495 | -                | yebY              | hypothetical protein                                            |
| G2583_2292 | CDS   | 2316508 | 2317380 | -                | yebZ              | Copper resistance protein D                                     |
| G2583_2293 | CDS   | 2317384 | 2317758 | -                | yobA              | Copper resistance protein CopC                                  |
| G2583_2294 | CDS   | 2317897 | 2318127 | +                | holE              | DNA polymerase III subunit theta                                |
| G2583_2295 | CDS   | 2318229 | 2318885 | +                | yobB              | Hydrolase, carbon-nitrogen family                               |
| G2583_2296 | CDS   | 2318909 | 2319571 | +                | exoX              | Exodeoxyribonuclease 10                                         |
| G2583_2297 | CDS   | 2319568 | 2321628 | -                | ptrB              | Oligopeptidase B                                                |
| G2583_2298 | CDS   | 2321837 | 2322496 | -                | yebE              | hypothetical protein                                            |
| G2583_2299 | CDS   | 2322823 | 2323191 | -                | yebF              | hypothetical protein                                            |
| G2583_2300 | CDS   | 2323246 | 2323536 | -                | yebG              | hypothetical protein                                            |
| G2583_2301 | CDS   | 2323670 | 2324848 | +                | purT              | Phosphoribosylglycinamide formyltransferase 2                   |
| G2583_2302 | CDS   | 2324904 | 2325545 | -                | eda               | KDPG and KHG aldolase                                           |
| G2583_2303 | CDS   | 2325582 | 2327393 | -                | edd               | Phosphogluconate dehydratase                                    |
| G2583_2304 | CDS   | 2327628 | 2329103 | -                | zwf               | Glucose-6-phosphate 1-dehydrogenase                             |
| G2583_2305 | CDS   | 2329441 | 2330310 | +                | yebK              | DNA-binding transcriptional regulator HexR                      |
| G2583_2306 | CDS   | 2330438 | 2331880 | +                | pykA              | Pyruvate kinase II                                              |
| G2583_2307 | CDS   | 2332011 | 2332982 | -                | lpxM              | Lipid A biosynthesis (KDO)2-(Lauroyl)-lipid IVA acyltransferase |
| G2583_2308 | CDS   | 2333102 | 2334424 | -                | yebA              | Uncharacterized metalloprotease yebA                            |
| G2583_2309 | CDS   | 2334440 | 2335387 | -                | znuA              | Putative adhesin                                                |
| G2583_2310 | CDS   | 2335451 | 2336206 | +                | znuC              | Zinc import ATP-binding protein znuC                            |
| G2583_2311 | CDS   | 2336203 | 2336988 | +                | znuB              | Zinc uptake ABC transporter, permease protein ZnuB              |
| G2583_2312 | CDS   | 2337234 | 2338244 | -                | ruvB              | Holliday junction ATP-dependent DNA helicase ruvB               |
| G2583_2313 | CDS   | 2338253 | 2338864 | -                | ruvA              | Holliday junction ATP-dependent DNA helicase ruvA               |
| G2583_2314 | CDS   | 2339139 | 2339741 | +                | yebB              | hypothetical protein                                            |
| G2583_2315 | CDS   | 2339743 | 2340264 | -                | ruvC              | Crossover junction endodeoxyribonuclease ruvC                   |
| G2583_2316 | CDS   | 2340299 | 2341039 | -                | yebC              | UPF0082 protein yebC                                            |
| G2583_2317 | CDS   | 2341068 | 2341577 | -                | nudB              | dATP pyrophosphohydrolase                                       |
| G2583_2318 | CDS   | 2341638 | 2343410 | -                | aspS              | Aspartyl-tRNA synthetase                                        |
| G2583_2319 | CDS   | 2343720 | 2344286 | +                | yecD              | hypothetical protein                                            |
| G2583_2320 | CDS   | 2344283 | 2345101 | +                | yecE              | hypothetical protein                                            |
| G2583_2321 | CDS   | 2345196 | 2345549 | +                | yecN              | hypothetical protein                                            |
| G2583_2322 | CDS   | 2345590 | 2346333 | +                | cmoA              | tRNA (cmo5U34)-methyltransferase                                |
| G2583_2323 | CDS   | 2346330 | 2347301 | +                | cmoB              | tRNA (mo5U34)-methyltransferase                                 |
| G2583_2324 | CDS   | 2347466 | 2349913 | -                | torZ              | Trimethylamine N-oxide reductase III, subunit TorZ              |
| G2583_2325 | CDS   | 2349920 | 2351020 | -                | torY              | Cytochrome c-type protein torY                                  |
| G2583_2326 | CDS   | 2351408 | 2352154 | -                | cutC              | Copper homeostasis protein cutC                                 |
| G2583_2327 | CDS   | 2352168 | 2352740 | -                | yecM              | hypothetical protein                                            |
| G2583_2328 | CDS   | 2352950 | 2354683 | +                | argS              | Arginyl-tRNA synthetase                                         |
| G2583_2329 | CDS   | 2354860 | 2355348 | +                | yecT              | hypothetical protein                                            |
| G2583_2330 | CDS   | 2355468 | 2355860 | -                | flhE              | hypothetical protein                                            |
| G2583_2331 | CDS   | 2355860 | 2357938 | -                | flhA              | Flagellar biosynthesis protein flhA                             |
| G2583_2332 | CDS   | 2357931 | 2359079 | -                | flhB              | Flagellar biosynthetic protein FlhB                             |
| G2583_2333 | CDS   | 2359281 | 2359925 | -                | cheZ              | Chemotaxis phosphatase CheZ                                     |
| G2583_2334 | CDS   | 2359936 | 2360325 | -                | cheY              | Chemotaxis protein cheY                                         |
| G2583_2335 | CDS   | 2360340 | 2361389 | -                | cheB              | Chemotaxis response regulator protein-glutamate                 |
| G2583_2336 | CDS   | 2361392 | 2362252 | -                | cheR              | Chemotaxis protein methyltransferase CheR                       |

| Locus_tag  | Type  | Start   | End     | +/- <sup>a</sup> | Gene <sup>b</sup> | Product                                                  |
|------------|-------|---------|---------|------------------|-------------------|----------------------------------------------------------|
| G2583_2337 | CDS   | 2362271 | 2363872 | -                | tap               | Methyl-accepting chemotaxis protein IV                   |
| G2583_2338 | CDS   | 2363918 | 2365579 | -                | tar               | Methyl-accepting chemotaxis protein II                   |
| G2583_2339 | ncRNA | 2365627 | 2365702 | +                | -                 | ncRNA                                                    |
| G2583_2340 | CDS   | 2365722 | 2366225 | -                | cheW              | Chemotaxis protein cheW                                  |
| G2583_2341 | CDS   | 2366246 | 2368210 | -                | cheA              | Sensory transducer kinase between chemo-signal receptors |
| G2583_2342 | CDS   | 2368215 | 2369141 | -                | motB              | Chemotaxis protein motB                                  |
| G2583_2343 | CDS   | 2369138 | 2370025 | -                | motA              | Chemotaxis protein MotA                                  |
| G2583_2344 | CDS   | 2370153 | 2370731 | -                | flhC              | Flagellar transcriptional activator flhC                 |
| G2583_2345 | CDS   | 2370734 | 2371093 | -                | flhD              | Transcriptional activator                                |
| G2583_2346 | CDS   | 2371864 | 2372292 | +                | uspC              | Universal stress protein C                               |
| G2583_2347 | CDS   | 2372299 | 2373723 | -                | otsA              | Alpha, alpha-trehalose-phosphate synthase [UDP-forming]  |
| G2583_2348 | CDS   | 2373698 | 2374498 | -                | otsB              | Trehalose-phosphatase                                    |
| G2583_2349 | CDS   | 2374665 | 2375654 | -                | araH              | ABC-type arabinose transport system, permease component  |
| G2583_2350 | CDS   | 2375666 | 2377180 | -                | araG              | Arabinose import ATP-binding protein araG                |
| G2583_2351 | CDS   | 2377250 | 2378239 | -                | araF              | L-arabinose-binding periplasmic protein                  |
| G2583_2352 | CDS   | 2379036 | 2379539 | +                | ftnB              | Ferritin-like protein 2                                  |
| G2583_2353 | CDS   | 2379619 | 2379870 | -                | yecJ              | hypothetical protein                                     |
| G2583_2354 | CDS   | 2379622 | 2379894 | +                | -                 | hypothetical protein                                     |
| G2583_2355 | CDS   | 2380334 | 2380657 | +                | yecR              | hypothetical protein                                     |
| G2583_2356 | CDS   | 2380828 | 2381325 | +                | ftnA              | Ferritin-1                                               |
| G2583_2357 | CDS   | 2381362 | 2381601 | -                | yecH              | hypothetical protein                                     |
| G2583_2358 | CDS   | 2381793 | 2383004 | +                | tyrP              | Tyrosine-specific transport protein                      |
| G2583_2359 | CDS   | 2383066 | 2383731 | -                | yecA              | SEC-C domain protein                                     |
| G2583_2360 | tRNA  | 2383927 | 2384013 | -                | -                 | Leu tRNA                                                 |
| G2583_2361 | tRNA  | 2384026 | 2384099 | -                | -                 | Cys tRNA                                                 |
| G2583_2362 | tRNA  | 2384153 | 2384228 | -                | -                 | Gly tRNA                                                 |
| G2583_2363 | CDS   | 2384380 | 2384928 | -                | pgsA              | CDP-diacylglycerol--glycerol-3-phosphate 3-              |
| G2583_2364 | CDS   | 2384985 | 2386817 | -                | uvrC              | UvrABC system protein C                                  |
| G2583_2365 | CDS   | 2386814 | 2387470 | -                | uvrY              | Response regulator uvrY                                  |
| G2583_2366 | CDS   | 2387929 | 2388153 | +                | yecF              | hypothetical protein                                     |
| G2583_2367 | CDS   | 2388221 | 2388943 | -                | sdiA              | DNA-binding transcriptional activator                    |
| G2583_2368 | CDS   | 2389173 | 2389925 | -                | yecC              | Amino acid ABC transporter, ATP-binding protein          |
| G2583_2369 | CDS   | 2389922 | 2390590 | -                | yecS              | putative transport system permease protein               |
| G2583_2370 | CDS   | 2390605 | 2391591 | -                | dcyD              | Putative 1-aminocyclopropane-1-carboxylate deaminase     |
| G2583_2371 | CDS   | 2391696 | 2392496 | -                | fliY              | Cystine-binding periplasmic protein                      |
| G2583_2372 | CDS   | 2392584 | 2393171 | -                | fliZ              | protein FliZ                                             |
| G2583_2373 | CDS   | 2393181 | 2393900 | -                | fliA              | RNA polymerase sigma factor for flagellar operon         |
| G2583_2374 | CDS   | 2394220 | 2395977 | -                | fliC              | Flagellin                                                |
| G2583_2375 | CDS   | 2396225 | 2397649 | +                | fliD              | Flagellar capping protein                                |
| G2583_2376 | CDS   | 2397674 | 2398084 | +                | fliS              | Flagellar protein FliS                                   |
| G2583_2377 | CDS   | 2398084 | 2398449 | +                | fliT              | Flagellar protein fliT                                   |
| G2583_2378 | CDS   | 2398527 | 2400014 | +                | amyA              | Alpha-amylase, cytoplasmic                               |
| G2583_2379 | CDS   | 2400048 | 2400464 | -                | yedD              | hypothetical protein                                     |
| G2583_2380 | CDS   | 2400648 | 2401853 | +                | yedE              | predicted inner membrane protein                         |
| G2583_2381 | CDS   | 2401850 | 2402083 | +                | yedF              | UPF0033 protein yedF                                     |
| G2583_2382 | CDS   | 2402192 | 2402860 | +                | yedK              | hypothetical protein                                     |
| G2583_2383 | CDS   | 2402971 | 2403450 | +                | yedL              | Acetyltransferase, GNAT family                           |
| G2583_2384 | CDS   | 2403588 | 2404727 | -                | yedM              | putative secreted protein                                |
| G2583_2385 | CDS   | 2405109 | 2405408 | +                | yedL              | acetyltransferase, gnat family                           |
| G2583_2386 | CDS   | 2405648 | 2406685 | -                | yedM              | putative secreted protein                                |
| G2583_2387 | CDS   | 2406863 | 2407114 | +                | int               | Putative lambdoid prophage defective integrase           |
| G2583_2388 | CDS   | 2407034 | 2407348 | -                | fliE              | Flagellar hook-basal body complex protein fliE           |
| G2583_2389 | CDS   | 2407563 | 2409221 | +                | fliF              | Flagellar M-ring protein FliF precursor                  |
| G2583_2390 | CDS   | 2409214 | 2410209 | +                | fliG              | Flagellar motor switch protein fliG                      |
| G2583_2391 | CDS   | 2410202 | 2410888 | +                | fliH              | Flagellar biosynthesis                                   |
| G2583_2392 | CDS   | 2410888 | 2412261 | +                | fliI              | Flagellum-specific ATP synthase                          |
| G2583_2393 | CDS   | 2412280 | 2412723 | +                | fliJ              | Flagellar fliJ protein                                   |
| G2583_2394 | CDS   | 2412720 | 2413847 | +                | fliK              | Flagellar hook-length control protein FliK               |
| G2583_2395 | CDS   | 2413952 | 2414416 | +                | fliL              | Flagellar fliL protein                                   |
| G2583_2396 | CDS   | 2414421 | 2415425 | +                | fliM              | Flagellar motor switch protein FliM                      |



| Locus_tag  | Type  | Start   | End     | +/- <sup>a</sup> | Gene <sup>b</sup> | Product                                                        |
|------------|-------|---------|---------|------------------|-------------------|----------------------------------------------------------------|
| G2583_2397 | CDS   | 2415422 | 2415835 | +                | fliN              | Flagellar motor switch protein FliN                            |
| G2583_2398 | CDS   | 2415838 | 2416203 | +                | fliO              | Flagellar biogenesis protein                                   |
| G2583_2399 | CDS   | 2416203 | 2416940 | +                | fliP              | Flagellar biosynthetic protein fliP precursor                  |
| G2583_2400 | CDS   | 2416950 | 2417219 | +                | fliQ              | hypothetical protein                                           |
| G2583_2401 | CDS   | 2417227 | 2418012 | +                | fliR              | Flagellar biosynthetic protein FliR                            |
| G2583_2402 | CDS   | 2418302 | 2418925 | +                | rcsA              | Colanic acid capsular biosynthesis activation protein A        |
| G2583_2403 | CDS   | 2418969 | 2419157 | -                | dsrB              | putative oxidoreductase Fe-S binding subunit                   |
| G2583_2404 | CDS   | 2419305 | 2419547 | +                | yodD              | hypothetical protein                                           |
| G2583_2405 | ncRNA | 2419561 | 2419647 | -                | dsrA              | ncRNA                                                          |
| G2583_2406 | CDS   | 2419845 | 2420660 | +                | yedP              | Putative mannosyl-3-phosphoglycerate phosphatase               |
| G2583_2407 | CDS   | 2420657 | 2422351 | -                | yedQ              | Cellulose synthesis regulatory protein                         |
| G2583_2408 | CDS   | 2422522 | 2422704 | -                | yodC              | hypothetical protein                                           |
| G2583_2409 | CDS   | 2422783 | 2423700 | -                | yedI              | putative membrane protein                                      |
| G2583_2410 | CDS   | 2423873 | 2424793 | +                | yedA              | Uncharacterized inner membrane transporter yedA                |
| G2583_2411 | CDS   | 2424782 | 2425252 | -                | vsr               | Very short patch repair protein                                |
| G2583_2412 | CDS   | 2425233 | 2426651 | -                | dcm               | DNA-cytosine methyltransferase                                 |
| G2583_2413 | CDS   | 2426718 | 2427413 | -                | yedJ              | Putative metal-dependent phosphohydrolase                      |
| G2583_2414 | CDS   | 2427453 | 2427818 | -                | yedR              | hypothetical protein                                           |
| G2583_2415 | CDS   | 2428383 | 2429570 | +                | ompS              | Outer membrane protein                                         |
| G2583_2416 | CDS   | 2429651 | 2430001 | +                | -                 | hypothetical protein                                           |
| G2583_2417 | CDS   | 2430162 | 2431013 | +                | hchA              | Chaperone protein hchA                                         |
| G2583_2418 | CDS   | 2431121 | 2432479 | -                | yedV              | Heavy metal sensor histidine kinase                            |
| G2583_2419 | CDS   | 2432479 | 2433261 | -                | yedW              | Heavy metal response regulator                                 |
| G2583_2420 | CDS   | 2433283 | 2433696 | +                | yedX              | Transthyretin-like protein precursor                           |
| G2583_2421 | CDS   | 2433804 | 2434808 | +                | yedY              | UPF0190 protein yedY precursor                                 |
| G2583_2422 | CDS   | 2434809 | 2435444 | +                | yedZ              | UPF0191 membrane protein yedZ                                  |
| G2583_2423 | CDS   | 2435701 | 2436351 | +                | yodA              | Ribulose-phosphate 3-epimerase precursor                       |
| G2583_2424 | CDS   | 2436461 | 2436610 | +                | -                 | hypothetical protein                                           |
| G2583_2425 | CDS   | 2436664 | 2437224 | +                | yodB              | putative cytochrome                                            |
| G2583_2426 | CDS   | 2437248 | 2437490 | +                | -                 | hypothetical protein                                           |
| G2583_2427 | CDS   | 2437794 | 2438153 | +                | -                 | unknown protein encoded within prophage CP-933U                |
| G2583_2428 | CDS   | 2438361 | 2439014 | +                | -                 | unknown protein encoded within prophage CP-933U                |
| G2583_2429 | CDS   | 2439339 | 2440211 | +                | -                 | Tir-cytoskeleton coupling protein                              |
| G2583_2430 | CDS   | 2440608 | 2441636 | -                | -                 | Tail fiber protein                                             |
| G2583_2431 | CDS   | 2441987 | 2442586 | -                | -                 | Enterobacterial Ail/Lom family protein                         |
| G2583_2432 | CDS   | 2442654 | 2446130 | -                | -                 | Putative host specificity protein                              |
| G2583_2433 | CDS   | 2445805 | 2446791 | +                | -                 | Superoxide dismutase [Cu-Zn]                                   |
| G2583_2434 | CDS   | 2446822 | 2447028 | -                | -                 | hypothetical protein                                           |
| G2583_2435 | CDS   | 2447560 | 2448300 | -                | -                 | Cell wall-associated hydrolases (invasion-associated proteins) |
| G2583_2436 | CDS   | 2448306 | 2449004 | -                | -                 | Phage-related protein                                          |
| G2583_2437 | CDS   | 2449004 | 2449333 | -                | -                 | Putative tail component of prophage CP-933R                    |
| G2583_2438 | CDS   | 2449330 | 2451909 | -                | -                 | putative tail component of prophage CP-933O                    |
| G2583_2439 | CDS   | 2451890 | 2452303 | -                | -                 | Phage tail assembly protein T                                  |
| G2583_2440 | CDS   | 2452330 | 2452833 | -                | -                 | hypothetical protein                                           |
| G2583_2441 | CDS   | 2452775 | 2453527 | -                | -                 | hypothetical protein                                           |
| G2583_2442 | CDS   | 2453535 | 2453930 | -                | -                 | Putative tail component of prophage                            |
| G2583_2443 | CDS   | 2453927 | 2454460 | -                | -                 | prophage minor tail protein Z                                  |
| G2583_2444 | CDS   | 2454476 | 2454829 | -                | -                 | Phage Head-Tail Attachment                                     |
| G2583_2445 | CDS   | 2454822 | 2455205 | -                | -                 | conserved hypothetical protein                                 |
| G2583_2446 | CDS   | 2455257 | 2456285 | -                | -                 | phage major capsid protein E                                   |
| G2583_2447 | CDS   | 2456343 | 2456690 | -                | -                 | Bacteriophage lambda head decoration protein D                 |
| G2583_2448 | CDS   | 2456727 | 2458232 | -                | -                 | Periplasmic serine proteases (ClpP class)                      |
| G2583_2449 | CDS   | 2458222 | 2459814 | -                | -                 | Bacteriophage capsid protein                                   |
| G2583_2450 | CDS   | 2459811 | 2460017 | -                | -                 | putative head completion protein                               |
| G2583_2451 | CDS   | 2460001 | 2461965 | -                | -                 | Putative terminase large subunit of prophage CP-933O           |
| G2583_2452 | CDS   | 2461901 | 2462410 | -                | -                 | Prophage Qin DNA packaging protein NU1-like protein            |
| G2583_2453 | CDS   | 2463134 | 2463271 | -                | -                 | hypothetical protein                                           |
| G2583_2454 | CDS   | 2463688 | 2463882 | -                | -                 | hypothetical protein                                           |
| G2583_2455 | CDS   | 2463879 | 2464457 | -                | -                 | putative endopeptidase                                         |
| G2583_2456 | CDS   | 2464473 | 2464688 | -                | -                 | conserved hypothetical protein                                 |

| Locus_tag  | Type       | Start   | End     | +/- <sup>a</sup> | Gene <sup>b</sup> | Product                                                           |
|------------|------------|---------|---------|------------------|-------------------|-------------------------------------------------------------------|
| G2583_2457 | CDS        | 2465016 | 2465549 | -                | -                 | Phage-related lysozyme (muraminidase)                             |
| G2583_2458 | CDS        | 2465592 | 2466581 | -                | -                 | hypothetical protein                                              |
| G2583_2459 | CDS        | 2466586 | 2466861 | -                | -                 | Putative holin protein                                            |
| G2583_2460 | CDS        | 2467085 | 2468935 | -                | -                 | YjhS                                                              |
| G2583_5272 | tRNA       | 2469425 | 2469501 | -                | -                 | Arg tRNA                                                          |
| G2583_5273 | tRNA       | 2469599 | 2469674 | -                | -                 | Met tRNA                                                          |
| G2583_2461 | CDS        | 2469703 | 2470416 | -                | -                 | Putative envelope protein encoded within prophage CP-933N         |
| G2583_2462 | CDS        | 2471037 | 2471861 | -                | -                 | CAAX amino terminal protease family                               |
| G2583_2463 | CDS        | 2472008 | 2472379 | -                | ybcQ              | Phage antitermination Q type 1 family                             |
| G2583_2464 | CDS        | 2472369 | 2472740 | -                | rusA              | Crossover junction endodeoxyribonuclease RusA                     |
| G2583_2465 | CDS        | 2472753 | 2473802 | -                | -                 | hypothetical protein                                              |
| G2583_2466 | CDS        | 2473804 | 2474082 | -                | -                 | hypothetical protein                                              |
| G2583_2467 | CDS        | 2474152 | 2474409 | -                | rem               | hypothetical protein                                              |
| G2583_2468 | CDS        | 2474567 | 2475658 | -                | -                 | Helix-turn-helix domain protein                                   |
| G2583_2469 | CDS        | 2475651 | 2476301 | -                | -                 | hypothetical protein                                              |
| G2583_2470 | CDS        | 2476467 | 2476622 | -                | -                 | Putative cell killing protein encoded within cryptic prophage CP- |
| G2583_2471 | CDS        | 2476994 | 2478025 | -                | -                 | conserved hypothetical protein                                    |
| G2583_2472 | CDS        | 2478394 | 2478801 | -                | -                 | LygF                                                              |
| G2583_2473 | CDS        | 2478842 | 2479807 | -                | -                 | Phage O protein family                                            |
| G2583_2474 | CDS        | 2479788 | 2480309 | -                | ydfX              | hypothetical protein                                              |
| G2583_2475 | CDS        | 2480293 | 2480520 | -                | -                 | hypothetical protein                                              |
| G2583_2476 | CDS        | 2480547 | 2481005 | +                | dicA              | Similar to DicA, regulator of DicB encoded by prophage            |
| G2583_2477 | CDS        | 2481042 | 2481350 | +                | ydfA              | hypothetical protein                                              |
| G2583_2478 | CDS        | 2481464 | 2482213 | -                | -                 | unknown protein encoded by prophage CP-933N                       |
| G2583_2479 | CDS        | 2482416 | 2482709 | +                | DicB              | Putative regulator of cell division encoded by prophage CP-       |
| G2583_2480 | CDS        | 2482706 | 2482894 | +                | -                 | hypothetical protein                                              |
| G2583_2481 | CDS        | 2482987 | 2485404 | +                | recE              | Exodeoxyribonuclease VIII                                         |
| G2583_2482 | CDS        | 2485463 | 2485666 | +                | -                 | hypothetical protein                                              |
| G2583_2483 | CDS        | 2485666 | 2486691 | +                | intU              | Site-specific recombinase, phage integrase family                 |
| G2583_2484 | tRNA       | 2486743 | 2486834 | -                | -                 | Ser tRNA                                                          |
| G2583_2485 | CDS        | 2486888 | 2487724 | +                | mtfA              | hypothetical protein                                              |
| G2583_2486 | tRNA       | 2487824 | 2487901 | +                | -                 | Asn tRNA                                                          |
| G2583_2487 | pseudogene | 2488187 | 2489323 | +                | yeeJ              | Putative invasin                                                  |
| G2583_2488 | CDS        | 2489387 | 2496196 | +                | -                 | putative factor                                                   |
| G2583_2489 | CDS        | 2496458 | 2497510 | -                | -                 | hypothetical protein                                              |
| G2583_2490 | CDS        | 2497825 | 2499141 | +                | shiA              | Shikimate transporter                                             |
| G2583_2491 | CDS        | 2499243 | 2500697 | +                | amn               | AMP nucleosidase                                                  |
| G2583_2492 | CDS        | 2501040 | 2501756 | +                | yeeN              | UPF0082 protein yeeN                                              |
| G2583_2493 | tRNA       | 2502205 | 2502282 | -                | -                 | Asn tRNA                                                          |
| G2583_2494 | pseudogene | 2502382 | 2502705 | -                | yeeO              | MATE efflux family protein                                        |
| G2583_2495 | CDS        | 2502580 | 2504022 | -                | yeeO              | MATE efflux family protein                                        |
| G2583_2496 | tRNA       | 2504029 | 2504106 | +                | -                 | Asn tRNA                                                          |
| G2583_2497 | CDS        | 2504143 | 2505093 | -                | cbl               | transcriptional regulator Cbl                                     |
| G2583_2498 | CDS        | 2505195 | 2506112 | -                | nac               | Nitrogen assimilation regulatory protein Nac                      |
| G2583_2499 | tRNA       | 2506437 | 2506514 | +                | -                 | Asn tRNA                                                          |
| G2583_2500 | CDS        | 2506569 | 2507501 | -                | erfK              | Conserved protein with NAD(P)-binding Rossmann-fold domain        |
| G2583_2501 | CDS        | 2507566 | 2508645 | -                | cobT              | Nicotinate-nucleotide--dimethylbenzimidazole                      |
| G2583_2502 | CDS        | 2508657 | 2509400 | -                | cobS              | cobalamin synthase                                                |
| G2583_2503 | CDS        | 2509397 | 2509942 | -                | cobU              | cobalamin synthase                                                |
| G2583_2504 | CDS        | 2511602 | 2513761 | +                | yoeE              | Putative outer membrane receptor for iron compound or colicin     |
| G2583_2505 | CDS        | 2514132 | 2514770 | -                | ibrB              | putative ParB-like nuclease                                       |
| G2583_2506 | CDS        | 2514755 | 2515261 | -                | ibrA              | Immunoglobulin-binding regulator A-like protein                   |
| G2583_2507 | CDS        | 2515197 | 2515544 | +                | insN              | unknown protein encoded by IS911 within prophage CP-933L          |
| G2583_2508 | CDS        | 2515757 | 2516410 | +                | -                 | putative transposase                                              |
| G2583_2509 | CDS        | 2517416 | 2517691 | +                | -                 | Putative transposase subunit                                      |
| G2583_2510 | CDS        | 2517918 | 2518262 | -                | -                 | hypothetical protein                                              |
| G2583_2511 | CDS        | 2518721 | 2518867 | -                | -                 | hypothetical protein                                              |
| G2583_2512 | CDS        | 2518895 | 2520046 | +                | -                 | hypothetical protein                                              |
| G2583_2513 | CDS        | 2520130 | 2521002 | +                | yfjP              | hypothetical protein                                              |
| G2583_2514 | CDS        | 2521220 | 2523616 | +                | -                 | hypothetical protein                                              |

| Locus_tag  | Type       | Start   | End     | +/- <sup>a</sup> | Gene <sup>b</sup> | Product                                                  |
|------------|------------|---------|---------|------------------|-------------------|----------------------------------------------------------|
| G2583_2515 | CDS        | 2523613 | 2524518 | +                | -                 | hypothetical protein                                     |
| G2583_2516 | CDS        | 2524515 | 2525585 | +                | -                 | putative esterase                                        |
| G2583_2517 | CDS        | 2525613 | 2526404 | +                | -                 | hypothetical protein                                     |
| G2583_2518 | CDS        | 2526420 | 2526830 | +                | -                 | hypothetical protein                                     |
| G2583_2519 | CDS        | 2527051 | 2527872 | +                | yafZ              | conserved hypothetical protein                           |
| G2583_2520 | CDS        | 2527954 | 2528433 | +                | yafX              | Antirestriction protein                                  |
| G2583_2521 | CDS        | 2528448 | 2528924 | +                | yeeS              | DNA repair protein, RadC family                          |
| G2583_2522 | CDS        | 2528987 | 2529208 | +                | yeeT              | hypothetical protein                                     |
| G2583_2523 | CDS        | 2529282 | 2529650 | +                | yeeU              | Putative structural protein                              |
| G2583_2524 | pseudogene | 2529739 | 2530112 | +                | yeeV1             | hypothetical protein                                     |
| G2583_2525 | CDS        | 2530109 | 2530303 | +                | yeeW              | hypothetical protein                                     |
| G2583_2526 | CDS        | 2530744 | 2531100 | +                | yoeF              | hypothetical protein                                     |
| G2583_2527 | CDS        | 2531201 | 2531596 | -                | yeeX              | hypothetical protein                                     |
| G2583_2528 | CDS        | 2531702 | 2532760 | -                | yeeA              | hypothetical protein                                     |
| G2583_2529 | CDS        | 2532959 | 2533432 | -                | sbmC              | DNA gyrase inhibitory protein                            |
| G2583_2530 | CDS        | 2533551 | 2534723 | -                | dacD              | Serine-type D-Ala-D-Ala carboxypeptidase                 |
| G2583_2531 | CDS        | 2534926 | 2536353 | +                | sbcB              | Exonuclease I                                            |
| G2583_2532 | CDS        | 2536396 | 2536623 | -                | yeeD              | hypothetical protein                                     |
| G2583_2533 | CDS        | 2536637 | 2537695 | -                | yeeE              | Membrane protein, YeeE/YedE family                       |
| G2583_2534 | CDS        | 2537874 | 2539238 | -                | yeeF              | Hypothetical transport protein YeeF                      |
| G2583_2535 | CDS        | 2539499 | 2540449 | -                | yeeY              | Predicted DNA-binding transcriptional regulator          |
| G2583_2536 | CDS        | 2540474 | 2541298 | -                | yeeZ              | NAD dependent epimerase/dehydratase family protein       |
| G2583_2537 | CDS        | 2541381 | 2541635 | -                | yoeB              | Toxin yoeB                                               |
| G2583_2538 | CDS        | 2541632 | 2541883 | -                | yefM              | Antitoxin yefM                                           |
| G2583_2539 | CDS        | 2542167 | 2542217 | +                | hisL              | his operon leader peptide                                |
| G2583_2540 | CDS        | 2542363 | 2543262 | +                | hisG              | ATP phosphoribosyltransferase                            |
| G2583_2541 | CDS        | 2543268 | 2544572 | +                | hisD              | Bifunctional histidinol dehydrogenase and histidinol     |
| G2583_2542 | CDS        | 2544569 | 2545639 | +                | hisC              | Histidinol-phosphate aminotransferase                    |
| G2583_2543 | CDS        | 2545639 | 2546706 | +                | hisB              | Fused histidinol-phosphatase/imidazoleglycerol-phosphate |
| G2583_2544 | CDS        | 2546706 | 2547296 | +                | hisH              | Imidazole glycerol phosphate synthase                    |
| G2583_2545 | CDS        | 2547296 | 2548033 | +                | hisA              | 1-(5-phosphoribosyl)-5-[(5-                              |
| G2583_2546 | CDS        | 2548015 | 2548791 | +                | hisF              | Imidazole glycerol phosphate synthase subunit hisF       |
| G2583_2547 | CDS        | 2548785 | 2549396 | +                | hisI              | Fused phosphoribosyl-AMP cyclohydrolase/phosphoribosyl-  |
| G2583_2548 | CDS        | 2549493 | 2550530 | -                | wzz               | O-antigen chain length determinant Wzz                   |
| G2583_2549 | CDS        | 2550620 | 2551786 | -                | ugd               | UDP-glucose-6-dehydrogenase                              |
| G2583_2550 | CDS        | 2552477 | 2553100 | -                | ydcC              | Transposase IS4 family protein                           |
| G2583_2551 | CDS        | 2553701 | 2554867 | -                | wbdK              | Putative pyridoxamine 5-phosphate-dependent dehydrase    |
| G2583_2552 | CDS        | 2554864 | 2555787 | -                | wbcJ              | WbdJ                                                     |
| G2583_2553 | CDS        | 2555899 | 2557305 | -                | gnd               | 6-phosphogluconate dehydrogenase, decarboxylating        |
| G2583_2554 | CDS        | 2557389 | 2558138 | -                | wbgP              | Putative glycosyltransferase WbgP                        |
| G2583_2555 | CDS        | 2558149 | 2558946 | -                | wbgO              | Putative glycosyltransferase WbgO                        |
| G2583_2556 | CDS        | 2558943 | 2560220 | -                | wzx               | O-antigen flippase Wzx                                   |
| G2583_2557 | CDS        | 2560238 | 2561215 | -                | wxy               | O-antigen polymerase Wxy                                 |
| G2583_2558 | CDS        | 2561227 | 2562099 | -                | wbgN              | Putative fucosyltransferase WbgN                         |
| G2583_2559 | CDS        | 2562096 | 2563478 | -                | manB              | Phosphomannomutase ManB                                  |
| G2583_2560 | CDS        | 2563471 | 2564928 | -                | manC              | Mannose-1-P guanosyltransferase ManC                     |
| G2583_2561 | CDS        | 2564921 | 2565415 | -                | wcaH              | GDP-mannose mannosyl hydrolase                           |
| G2583_2562 | CDS        | 2565567 | 2566685 | -                | gmd               | GDP-mannose dehydratase Gmd                              |
| G2583_2563 | CDS        | 2566706 | 2567623 | -                | wbgM              | Putative galactosyltransferase WbgM                      |
| G2583_2564 | CDS        | 2568181 | 2569074 | -                | galF              | UDP-glucose pyrophosphorylase GalF                       |
| G2583_2565 | CDS        | 2569316 | 2570311 | -                | gne               | UDP-N-acetylglucosamine 4-epimerase                      |
| G2583_2566 | CDS        | 2570469 | 2571863 | -                | wcaM              | Predicted colanic acid biosynthesis protein WcaM         |
| G2583_2567 | CDS        | 2571874 | 2573094 | -                | wcaL              | Predicted glycosyl transferase WcaL                      |
| G2583_2568 | CDS        | 2573091 | 2574371 | -                | wcaK              | Predicted pyruvyl transferase WcaK                       |
| G2583_2569 | CDS        | 2574442 | 2575920 | -                | wzxC              | Colanic acid exporter WzxC                               |
| G2583_2570 | CDS        | 2575922 | 2577316 | -                | wcaJ              | Predicted UDP-glucose lipid carrier transferase WcaJ     |
| G2583_2571 | CDS        | 2577452 | 2578822 | -                | cpsG              | Phosphomannomutase CpsG                                  |
| G2583_2572 | CDS        | 2578924 | 2580360 | -                | cpsB              | Mannose-1-phosphate guanyltransferase CpsB               |
| G2583_2573 | CDS        | 2580363 | 2581586 | -                | wcaI              | Predicted glycosyl transferase WcaI                      |
| G2583_2574 | CDS        | 2581583 | 2582065 | -                | gmm               | GDP-mannose mannosyl hydrolase                           |

| Locus_tag  | Type  | Start   | End     | +/- <sup>a</sup> | Gene <sup>b</sup> | Product                                                          |
|------------|-------|---------|---------|------------------|-------------------|------------------------------------------------------------------|
| G2583_2575 | CDS   | 2582065 | 2583030 | -                | fcl               | Bifunctional GDP-fucose synthetase                               |
| G2583_2576 | CDS   | 2583033 | 2584154 | -                | gmd               | GDP-mannose 4,6-dehydratase                                      |
| G2583_2577 | CDS   | 2584181 | 2584729 | -                | wcaF              | Predicted acyl transferase WcaF                                  |
| G2583_2578 | CDS   | 2584745 | 2585491 | -                | wcaE              | Predicted glycosyl transferase WcaE                              |
| G2583_2579 | CDS   | 2585502 | 2586719 | -                | wcaD              | Putative colanic acid polymerase                                 |
| G2583_2580 | CDS   | 2586694 | 2587911 | -                | wcaC              | Predicted glycosyl transferase WcaC                              |
| G2583_2581 | CDS   | 2587908 | 2588396 | -                | wcaB              | Predicted acyl transferase WcaB                                  |
| G2583_2582 | CDS   | 2588399 | 2589238 | -                | wcaA              | Predicted glycosyl transferase WcaA                              |
| G2583_2583 | CDS   | 2589331 | 2591493 | -                | wzc               | Protein-tyrosine kinase Wzc                                      |
| G2583_2584 | CDS   | 2591496 | 2591939 | -                | wzb               | Low molecular weight protein-tyrosine-phosphatase wzb            |
| G2583_2585 | CDS   | 2591945 | 2593048 | -                | wza               | Putative polysaccharide export protein wza precursor             |
| G2583_2586 | CDS   | 2593677 | 2595326 | +                | yegH              | Putative transport protein                                       |
| G2583_2587 | CDS   | 2595401 | 2595739 | +                | -                 | hypothetical protein                                             |
| G2583_2588 | CDS   | 2595729 | 2596019 | +                | -                 | Putative DNA-binding protein                                     |
| G2583_2589 | CDS   | 2596072 | 2597925 | -                | asmA              | Predicted assembly protein AsmA                                  |
| G2583_2590 | CDS   | 2597947 | 2598528 | -                | dcd               | Deoxycytidine triphosphate deaminase                             |
| G2583_2591 | CDS   | 2598620 | 2599261 | -                | udk               | Uridine/cytidine kinase                                          |
| G2583_2592 | CDS   | 2599579 | 2602896 | +                | yegE              | Predicted diguanylate cyclase                                    |
| G2583_2593 | CDS   | 2602997 | 2603845 | -                | alkA              | 3-methyl-adenine DNA glycosylase II                              |
| G2583_2594 | CDS   | 2603979 | 2605331 | +                | yegD              | Predicted chaperone                                              |
| G2583_2595 | CDS   | 2605344 | 2607284 | -                | yegI              | conserved predicted protein                                      |
| G2583_2596 | CDS   | 2607281 | 2608042 | -                | yegK              | conserved predicted protein                                      |
| G2583_2597 | CDS   | 2608039 | 2608698 | -                | yegL              | Uncharacterized protein encoded in toxicity protection region of |
| G2583_2598 | ncRNA | 2608845 | 2608993 | +                | -                 | ncRNA                                                            |
| G2583_2599 | ncRNA | 2609179 | 2609321 | +                | -                 | ncRNA                                                            |
| G2583_2600 | CDS   | 2609585 | 2610832 | +                | mdtA              | hypothetical protein                                             |
| G2583_2601 | CDS   | 2610832 | 2613954 | +                | mdtB              | Multidrug resistance protein mdtB                                |
| G2583_2602 | CDS   | 2613955 | 2617032 | +                | mdtC              | Multidrug resistance protein mdtC                                |
| G2583_2603 | CDS   | 2617033 | 2618448 | +                | mdtD              | Multidrug resistance protein mdtD                                |
| G2583_2604 | CDS   | 2618445 | 2619848 | +                | baeS              | Sensor histidine kinase BaeS                                     |
| G2583_2605 | CDS   | 2619845 | 2620567 | +                | baeR              | DNA-binding response regulator in two-component regulatory       |
| G2583_2606 | CDS   | 2620719 | 2621090 | +                | yegP              | hypothetical protein                                             |
| G2583_2607 | CDS   | 2621334 | 2621585 | +                | -                 | Putative addiction module antidote protein, CC2985 family        |
| G2583_2608 | CDS   | 2621587 | 2621883 | +                | -                 | Plasmid stabilization system protein, RelE/ParE family           |
| G2583_2609 | CDS   | 2621986 | 2623347 | +                | yegQ              | hypothetical protein                                             |
| G2583_2610 | ncRNA | 2623430 | 2623510 | +                | -                 | ncRNA                                                            |
| G2583_2611 | CDS   | 2623540 | 2623689 | -                | -                 | hypothetical protein                                             |
| G2583_2612 | CDS   | 2623677 | 2624054 | -                | yegR              | hypothetical protein                                             |
| G2583_2613 | CDS   | 2624400 | 2625299 | +                | yegS              | Lipid kinase yegS                                                |
| G2583_2614 | CDS   | 2625372 | 2626019 | -                | -                 | hypothetical protein                                             |
| G2583_2615 | CDS   | 2626064 | 2627341 | -                | rbtT              | D-arabitol membrane transporter                                  |
| G2583_2616 | CDS   | 2627410 | 2628873 | -                | -                 | hypothetical protein                                             |
| G2583_2617 | CDS   | 2628887 | 2630254 | -                | -                 | Arabitol dehydrogenase                                           |
| G2583_2618 | CDS   | 2630462 | 2631403 | +                | -                 | D-arabitol repressor                                             |
| G2583_2619 | CDS   | 2631405 | 2632436 | -                | -                 | hypothetical protein                                             |
| G2583_2620 | CDS   | 2632596 | 2633345 | +                | -                 | Ribitol dehydrogenase                                            |
| G2583_2621 | CDS   | 2633356 | 2634960 | +                | rtlK              | Ribitol kinase                                                   |
| G2583_2622 | CDS   | 2635021 | 2635800 | -                | gatR              | Galactitol utilization operon repressor                          |
| G2583_2623 | CDS   | 2635900 | 2636940 | -                | gatD              | Galactitol-1-phosphate 5-dehydrogenase                           |
| G2583_2624 | CDS   | 2636988 | 2638343 | -                | gatC              | PTS system, galactitol-specific IIC component                    |
| G2583_2625 | CDS   | 2638347 | 2638631 | -                | gatB              | Galactitol-specific phosphotransferase enzyme IIB component      |
| G2583_2626 | CDS   | 2638662 | 2639114 | -                | gatA              | Galactitol-specific phosphotransferase enzyme IIA component      |
| G2583_2627 | CDS   | 2639124 | 2640386 | -                | gatZ              | Tagatose 6-phosphate kinase                                      |
| G2583_2628 | CDS   | 2640415 | 2641269 | -                | gatY              | Class II aldolase, tagatose bisphosphate family                  |
| G2583_2629 | CDS   | 2641576 | 2642628 | -                | fbaB              | Fructose-bisphosphate aldolase class 1                           |
| G2583_2630 | CDS   | 2642885 | 2644162 | +                | yegT              | Nucleoside transporter                                           |
| G2583_2631 | CDS   | 2644159 | 2645163 | +                | yegU              | ADP-ribosylglycohydrolase family protein                         |
| G2583_2632 | CDS   | 2645160 | 2646125 | +                | yegV              | Kinase, PfkB family                                              |
| G2583_2633 | CDS   | 2646099 | 2646845 | -                | yegW              | transcriptional regulator, GntR family                           |
| G2583_2634 | CDS   | 2646897 | 2647724 | -                | yegX              | hypothetical protein                                             |

| Locus_tag  | Type       | Start   | End     | +/- <sup>a</sup> | Gene <sup>b</sup> | Product                                                        |
|------------|------------|---------|---------|------------------|-------------------|----------------------------------------------------------------|
| G2583_2635 | CDS        | 2647780 | 2648580 | -                | thiD              | Hydroxymethylpyrimidine/phosphomethylpyrimidin e kinase        |
| G2583_2636 | CDS        | 2648577 | 2649365 | -                | thiM              | Hydroxyethylthiazole kinase                                    |
| G2583_2637 | CDS        | 2649699 | 2649938 | +                | -                 | hypothetical protein                                           |
| G2583_2638 | CDS        | 2650502 | 2650621 | -                | -                 | hypothetical protein                                           |
| G2583_2639 | CDS        | 2650990 | 2651337 | +                | -                 | hypothetical protein                                           |
| G2583_2640 | CDS        | 2651347 | 2651661 | +                | -                 | hypothetical protein                                           |
| G2583_2641 | CDS        | 2651771 | 2652043 | -                | rcnR              | hypothetical protein                                           |
| G2583_2642 | CDS        | 2652164 | 2652988 | +                | rcnA              | Nickel/cobalt efflux system rcnA                               |
| G2583_2643 | CDS        | 2653027 | 2653545 | +                | yohN              | hypothetical protein                                           |
| G2583_2644 | CDS        | 2653627 | 2654661 | -                | yehA              | predicted fimbrial-like adhesin protein                        |
| G2583_2645 | pseudogene | 2654677 | 2657157 | -                | yehB              | fimbrial usher protein                                         |
| G2583_2646 | pseudogene | 2657173 | 2657879 | -                | yehC              | gram-negative pilus assembly chaperone                         |
| G2583_2647 | CDS        | 2657927 | 2658469 | -                | yehD              | Fimbrial protein                                               |
| G2583_2648 | CDS        | 2658763 | 2659044 | -                | yehE              | hypothetical protein                                           |
| G2583_2649 | CDS        | 2659306 | 2660415 | -                | mrp               | Putative ATPase                                                |
| G2583_2650 | CDS        | 2660547 | 2662580 | +                | metG              | Methionyl-tRNA synthetase                                      |
| G2583_2651 | CDS        | 2662721 | 2665012 | +                | molR_A            | putative molybdate metabolism regulator                        |
| G2583_2652 | pseudogene | 2665013 | 2666521 | +                | molR_B            | putative molybdate metabolism regulator                        |
| G2583_2653 | CDS        | 2666534 | 2669566 | +                | molR_C            | interrupted molybdate metabolism regulator                     |
| G2583_2654 | CDS        | 2669576 | 2673208 | +                | yehI              | Molybdate metabolism regulator MolR-like protein               |
| G2583_2655 | CDS        | 2673269 | 2673586 | +                | yehK              | hypothetical protein                                           |
| G2583_2656 | CDS        | 2674151 | 2675305 | +                | yehL              | hypothetical protein                                           |
| G2583_2657 | CDS        | 2675316 | 2677595 | +                | yehM              | hypothetical protein                                           |
| G2583_2658 | CDS        | 2677588 | 2678724 | +                | yehP              | hypothetical protein                                           |
| G2583_2659 | CDS        | 2678721 | 2680724 | +                | yehQ              | hypothetical protein                                           |
| G2583_2660 | CDS        | 2680837 | 2681310 | +                | yehR              | Hypothetical lipoprotein YehR                                  |
| G2583_2661 | CDS        | 2681352 | 2681822 | -                | yehS              | hypothetical protein                                           |
| G2583_2662 | CDS        | 2681869 | 2682603 | -                | yehT              | putative two-component response-regulatory protein YehT        |
| G2583_2663 | CDS        | 2682585 | 2684270 | -                | yehU              | Sensor histidine kinase                                        |
| G2583_2664 | CDS        | 2684492 | 2685223 | +                | mlrA              | DNA-binding transcriptional regulator                          |
| G2583_2665 | CDS        | 2685371 | 2686102 | -                | yehW              | ABC transporter, quaternary amine uptake (QAT) family,         |
| G2583_2666 | CDS        | 2686107 | 2687033 | -                | yehX              | ABC transporter, quaternary amine uptake (QAT) family, ATP-    |
| G2583_2667 | CDS        | 2687026 | 2688183 | -                | yehY              | ABC transporter, quaternary amine uptake (QAT) family,         |
| G2583_2668 | CDS        | 2688190 | 2689107 | -                | osmF              | Substrate-binding region of ABC-type glycine betaine transport |
| G2583_2669 | CDS        | 2689359 | 2691656 | -                | bglX              | Periplasmic beta-glucosidase                                   |
| G2583_2670 | CDS        | 2691852 | 2693567 | +                | dld               | D-lactate dehydrogenase                                        |
| G2583_2671 | CDS        | 2693605 | 2694546 | -                | pbpG              | Penicillin-binding protein 7                                   |
| G2583_2672 | CDS        | 2694711 | 2695322 | -                | yohC              | hypothetical protein                                           |
| G2583_2673 | CDS        | 2695432 | 2696046 | +                | yohD              | hypothetical protein                                           |
| G2583_2674 | CDS        | 2696176 | 2696937 | -                | yohF              | Putative 3-oxoacyl-[acyl-carrier-protein] reductase            |
| G2583_2675 | CDS        | 2696990 | 2698426 | -                | yohG              | Multidrug resistance outer membrane protein mdtQ precursor     |
| G2583_2676 | CDS        | 2698770 | 2699093 | -                | -                 | hypothetical protein                                           |
| G2583_2677 | CDS        | 2699121 | 2700071 | -                | dusC              | tRNA-dihydrouridine synthase C                                 |
| G2583_2678 | CDS        | 2700231 | 2701424 | -                | -                 | FAD dependent oxidoreductase                                   |
| G2583_2679 | CDS        | 2701439 | 2702086 | -                | maiA              | Putative glutathione-S-transferase                             |
| G2583_2680 | CDS        | 2702092 | 2702793 | -                | -                 | Fumarylacetoacetate hydrolase family protein                   |
| G2583_2681 | CDS        | 2702808 | 2703836 | -                | gtdA              | Gentisate 1,2-dioxygenase                                      |
| G2583_2682 | CDS        | 2703848 | 2705206 | -                | -                 | Putative transporter                                           |
| G2583_2683 | CDS        | 2705285 | 2706241 | +                | -                 | putative regulator                                             |
| G2583_2684 | CDS        | 2706372 | 2706770 | +                | yohJ              | UPF0299 membrane protein yohJ                                  |
| G2583_2685 | CDS        | 2706767 | 2707462 | +                | yohK              | Putative serotonin transporter                                 |
| G2583_2686 | CDS        | 2707592 | 2708476 | +                | cdd               | Cytidine deaminase                                             |
| G2583_2687 | CDS        | 2708626 | 2709345 | +                | sanA              | hypothetical protein                                           |
| G2583_2688 | CDS        | 2709348 | 2709587 | +                | yeiS              | hypothetical protein                                           |
| G2583_2689 | CDS        | 2709781 | 2711019 | +                | yeiT              | Uncharacterized oxidoreductase yeiT                            |
| G2583_2690 | CDS        | 2711013 | 2712248 | +                | yeiA              | putative oxidoreductase                                        |
| G2583_2691 | CDS        | 2712491 | 2713501 | -                | mgIC              | Galactose ABC transporter, permease protein                    |
| G2583_2692 | CDS        | 2713517 | 2715037 | -                | mgIA              | Galactose/methyl galactoside import ATP-binding protein mgIA   |
| G2583_2693 | CDS        | 2715098 | 2716096 | -                | mgIB              | Galactose ABC transporter, periplasmic galactose-binding       |
| G2583_2694 | CDS        | 2716376 | 2717416 | -                | galS              | DNA-binding transcriptional repressor                          |

| Locus_tag  | Type | Start   | End     | +/- <sup>a</sup> | Gene <sup>b</sup> | Product                                                   |
|------------|------|---------|---------|------------------|-------------------|-----------------------------------------------------------|
| G2583_2695 | CDS  | 2717558 | 2718715 | -                | yeiB              | hypothetical protein                                      |
| G2583_2696 | CDS  | 2718732 | 2719400 | -                | folE              | GTP cyclohydrolase 1                                      |
| G2583_2697 | CDS  | 2719658 | 2720494 | +                | yeiG              | S-formylglutathione hydrolase yeiG                        |
| G2583_2698 | CDS  | 2720526 | 2722505 | -                | cirA              | Colicin I receptor                                        |
| G2583_2699 | CDS  | 2722797 | 2724266 | -                | lysP              | Lysine-specific permease                                  |
| G2583_2700 | CDS  | 2724471 | 2725352 | -                | yeiE              | putative DNA-binding transcriptional regulator            |
| G2583_2701 | CDS  | 2725451 | 2726500 | +                | yeiH              | UPF0324 inner membrane protein yeiH                       |
| G2583_2702 | CDS  | 2726574 | 2727431 | +                | nfo               | Endonuclease 4                                            |
| G2583_2703 | CDS  | 2727434 | 2728522 | +                | yeiL              | Kinase, pfkB family                                       |
| G2583_2704 | CDS  | 2728578 | 2729828 | -                | nupX              | Nucleoside permease                                       |
| G2583_2705 | CDS  | 2729928 | 2730869 | -                | rihB              | Pyrimidine-specific ribonucleoside hydrolase rihB         |
| G2583_2706 | CDS  | 2730999 | 2731697 | +                | yeiL              | DNA-binding transcriptional activator of stationary phase |
| G2583_2707 | CDS  | 2731768 | 2733018 | -                | yeiM              | Nucleoside transporter, NupC family                       |
| G2583_2708 | CDS  | 2733112 | 2734050 | -                | yeiN              | Indigoidine synthase A like protein                       |
| G2583_2709 | CDS  | 2734038 | 2734979 | -                | yeiC              | Kinase, pfkB family protein                               |
| G2583_2710 | CDS  | 2735403 | 2737094 | -                | fruA              | fructose-specific PTS system IIBC component               |
| G2583_2711 | CDS  | 2737111 | 2738049 | -                | fruK              | 1-phosphofructokinase                                     |
| G2583_2712 | CDS  | 2738049 | 2739179 | -                | fruB              | Pts system mannitol-specific eiicba component             |
| G2583_2713 | CDS  | 2739547 | 2740728 | +                | setB              | Sugar efflux transporter B                                |
| G2583_2714 | CDS  | 2741134 | 2741706 | +                | yeiP              | Elongation factor P family protein                        |
| G2583_2715 | CDS  | 2741929 | 2743395 | +                | yeiQ              | Mannitol dehydrogenase family protein                     |
| G2583_2716 | CDS  | 2743513 | 2744499 | +                | yeiR              | CobW/P47K family protein                                  |
| G2583_2717 | CDS  | 2744502 | 2745251 | +                | yeiU              | hypothetical protein                                      |
| G2583_2718 | CDS  | 2745664 | 2746230 | +                | spr               | Lipoprotein spr precursor                                 |
| G2583_2719 | CDS  | 2746411 | 2747967 | +                | rtn               | Putative cyclic diguanylate phosphodiesterase             |
| G2583_2720 | CDS  | 2748049 | 2749863 | +                | yejA              | ABC transporter, periplasmic solute-binding protein       |
| G2583_2721 | CDS  | 2749864 | 2750958 | +                | yejB              | Inner membrane ABC transporter permease protein yejB      |
| G2583_2722 | CDS  | 2750958 | 2751983 | +                | yejE              | ABC transporter, permease protein                         |
| G2583_2723 | CDS  | 2751985 | 2753574 | +                | yejF              | ABC transporter, ATP-binding protein                      |
| G2583_2724 | CDS  | 2753578 | 2753922 | -                | yejG              | hypothetical protein                                      |
| G2583_2725 | CDS  | 2754255 | 2755445 | -                | bcr               | Bicyclomycin resistance protein                           |
| G2583_2726 | CDS  | 2755473 | 2756168 | -                | rsuA              | Pseudouridine synthase                                    |
| G2583_2727 | CDS  | 2756317 | 2758077 | +                | yejH              | Putative helicase                                         |
| G2583_2728 | CDS  | 2758202 | 2758486 | +                | rplY              | 50S ribosomal protein L25                                 |
| G2583_2729 | CDS  | 2758625 | 2759632 | -                | yejK              | Nucleoid-associated protein ndpA                          |
| G2583_2730 | CDS  | 2759814 | 2760041 | +                | yejL              | UPF0352 protein yejL                                      |
| G2583_2731 | CDS  | 2760061 | 2761821 | +                | yejM              | Inner membrane protein yejM                               |
| G2583_2732 | tRNA | 2761895 | 2761973 | +                | -                 | Pro tRNA                                                  |
| G2583_2733 | CDS  | 2762073 | 2764664 | -                | yejO              | Putative autotransporter, IS5K-containing                 |
| G2583_2734 | CDS  | 2764984 | 2765631 | +                | narP              | Nitrate/nitrite response regulator NarP                   |
| G2583_2735 | CDS  | 2765666 | 2766718 | -                | ccmH              | Cytochrome c-type biogenesis family protein               |
| G2583_2736 | CDS  | 2766715 | 2767272 | -                | ccmG              | Thiol:disulfide interchange protein dsbE                  |
| G2583_2737 | CDS  | 2767269 | 2769212 | -                | ccmF              | Cytochrome c-type biogenesis protein CcmF                 |
| G2583_2738 | CDS  | 2769209 | 2769688 | -                | ccmE              | Cytochrome c-type biogenesis protein ccmE                 |
| G2583_2739 | CDS  | 2769685 | 2769855 | -                | ccmD              | heme exporter protein D                                   |
| G2583_2740 | CDS  | 2769891 | 2770628 | -                | ccmC              | Heme exporter protein C                                   |
| G2583_2741 | CDS  | 2770670 | 2771332 | -                | ccmB              | Heme exporter protein B                                   |
| G2583_2742 | CDS  | 2771329 | 2771952 | -                | ccmA              | Cytochrome c biogenesis ATP-binding export protein ccmA   |
| G2583_2743 | CDS  | 2771965 | 2772567 | -                | napC              | Cytochrome c-type protein napC                            |
| G2583_2744 | CDS  | 2772577 | 2773026 | -                | napB              | Cytochrome c-type protein                                 |
| G2583_2745 | CDS  | 2773023 | 2773886 | -                | napH              | Polyferredoxin                                            |
| G2583_2746 | CDS  | 2773873 | 2774568 | -                | napG              | Ferredoxin-type protein napG precursor                    |
| G2583_2747 | CDS  | 2774575 | 2777061 | -                | napA              | Periplasmic nitrate reductase precursor                   |
| G2583_2748 | CDS  | 2777058 | 2777321 | -                | napD              | Periplasmic nitrate reductase                             |
| G2583_2749 | CDS  | 2777311 | 2777805 | -                | napF              | Ferredoxin-type protein napF                              |
| G2583_2750 | CDS  | 2778212 | 2778700 | +                | eco               | Ecotin precursor                                          |
| G2583_2751 | CDS  | 2778850 | 2780496 | -                | mqq               | Malate:quinone oxidoreductase                             |
| G2583_2752 | CDS  | 2780714 | 2782357 | -                | yojI              | ABC transporter ATP-binding protein                       |
| G2583_2753 | CDS  | 2782433 | 2783083 | -                | alkB              | alkylated DNA repair protein                              |
| G2583_2754 | CDS  | 2783083 | 2784147 | -                | ada               | O6-methylguanine-DNA methyltransferase; transcription     |

| Locus_tag  | Type       | Start   | End     | +/- <sup>a</sup> | Gene <sup>b</sup> | Product                                                        |
|------------|------------|---------|---------|------------------|-------------------|----------------------------------------------------------------|
| G2583_2755 | CDS        | 2784221 | 2785276 | -                | apbE              | Thiamine biosynthesis lipoprotein apbE precursor               |
| G2583_2756 | CDS        | 2785388 | 2786491 | -                | ompC              | Outer membrane protein C precursor                             |
| G2583_2757 | ncRNA      | 2786825 | 2786918 | +                | micF              | ncRNA                                                          |
| G2583_2758 | CDS        | 2787230 | 2789902 | +                | rcsD              | Sensor histidine kinase YojN                                   |
| G2583_2759 | CDS        | 2789919 | 2790569 | +                | rcsB              | Capsular synthesis regulator component B                       |
| G2583_2760 | CDS        | 2790769 | 2793618 | -                | rcsC              | Sensor histidine kinase/response regulator RcsC                |
| G2583_2761 | CDS        | 2793893 | 2794669 | -                | yfaP              | hypothetical protein                                           |
| G2583_2762 | pseudogene | 2794674 | 2796323 | -                | yfaQ              | hypothetical protein                                           |
| G2583_2763 | pseudogene | 2796324 | 2797721 | -                | yfaSR             | alpha-2-macroglobulin family protein                           |
| G2583_2764 | CDS        | 2797711 | 2797842 | +                | -                 | hypothetical protein                                           |
| G2583_2765 | CDS        | 2797951 | 2799147 | +                | ISSfl2            | ISSfl2 ORF                                                     |
| G2583_2766 | pseudogene | 2799142 | 2802378 | -                | yfaS              | alpha-2-macroglobulin family protein                           |
| G2583_2767 | CDS        | 2802312 | 2802962 | -                | yfaT              | hypothetical protein                                           |
| G2583_2768 | CDS        | 2802932 | 2804620 | -                | yfaA              | hypothetical protein                                           |
| G2583_2769 | CDS        | 2804769 | 2807396 | -                | gyrA              | DNA gyrase, A subunit                                          |
| G2583_2770 | CDS        | 2807543 | 2808265 | +                | ubiG              | 3-demethylubiquinone-9 3-methyltransferase                     |
| G2583_2771 | CDS        | 2808406 | 2812158 | -                | yfaL              | Putative ATP-binding component of a transport system           |
| G2583_2772 | CDS        | 2812854 | 2815139 | +                | nrdA              | Ribonucleoside-diphosphate reductase, alpha subunit            |
| G2583_2773 | CDS        | 2815327 | 2816496 | +                | nrdB              | Ribonucleoside-diphosphate reductase 1, beta subunit, B2       |
| G2583_2774 | CDS        | 2816496 | 2816750 | +                | yfaE              | Ferredoxin                                                     |
| G2583_2775 | CDS        | 2816804 | 2817454 | -                | inaA              | pH-inducible protein involved in stress response               |
| G2583_2776 | pseudogene | 2817535 | 2818725 | -                | -                 | transporter, major facilitator family                          |
| G2583_2777 | CDS        | 2818877 | 2819755 | +                | yfaH              | putative regulator                                             |
| G2583_2778 | CDS        | 2820219 | 2821289 | +                | -                 | hypothetical protein                                           |
| G2583_2779 | CDS        | 2821513 | 2822589 | -                | glpQ              | Glycerophosphoryl diester phosphodiesterase                    |
| G2583_2780 | CDS        | 2822594 | 2823952 | -                | glpT              | Glycerol-3-phosphate transporter                               |
| G2583_2781 | CDS        | 2824225 | 2825853 | +                | glpA              | Anaerobic glycerol-3-phosphate dehydrogenase subunit A         |
| G2583_2782 | CDS        | 2825843 | 2827102 | +                | glpB              | Anaerobic glycerol-3-phosphate dehydrogenase subunit B         |
| G2583_2783 | CDS        | 2827099 | 2828289 | +                | glpC              | Anaerobic glycerol-3-phosphate dehydrogenase subunit C         |
| G2583_2784 | CDS        | 2828482 | 2829408 | +                | yfaD              | hypothetical protein                                           |
| G2583_2785 | CDS        | 2829449 | 2830252 | -                | yfaU              | putative aldolase                                              |
| G2583_2786 | CDS        | 2830270 | 2831598 | -                | yfaV              | Putative transport protein                                     |
| G2583_2787 | CDS        | 2831616 | 2832833 | -                | yfaW              | Putative racemase                                              |
| G2583_2788 | CDS        | 2832836 | 2833618 | -                | yfaX              | putative regulator                                             |
| G2583_2789 | CDS        | 2833838 | 2835040 | -                | yfaY              | CinA family protein                                            |
| G2583_2790 | CDS        | 2835140 | 2835703 | -                | yfaZ              | hypothetical protein                                           |
| G2583_2791 | CDS        | 2835961 | 2836386 | +                | nudI              | Nucleoside triphosphatase nudI                                 |
| G2583_2792 | CDS        | 2836425 | 2837027 | -                | ais               | protein induced by aluminum                                    |
| G2583_2793 | CDS        | 2837317 | 2838474 | +                | arnB              | UDP-4-amino-4-deoxy-L-arabinose--oxoglutarate                  |
| G2583_2794 | CDS        | 2838478 | 2839446 | +                | arnC              | Undecaprenyl-phosphate 4-deoxy-4-formamido-L-arabinose         |
| G2583_2795 | CDS        | 2839446 | 2841428 | +                | arnA              | Bifunctional polymyxin resistance protein arnA [Includes: UDP- |
| G2583_2796 | CDS        | 2841425 | 2842315 | +                | yfbH              | hypothetical protein                                           |
| G2583_2797 | CDS        | 2842315 | 2843967 | +                | arnT              | Undecaprenyl phosphate-alpha-4-amino-4-deoxy-L-arabinose       |
| G2583_2798 | CDS        | 2843964 | 2844299 | +                | yfbW              | Sucrose-6 phosphate hydrolase                                  |
| G2583_2799 | CDS        | 2844299 | 2844685 | +                | yfbJ              | putative transport/receptor protein                            |
| G2583_2800 | CDS        | 2844679 | 2844975 | -                | pmrD              | Polymyxin resistance protein B                                 |
| G2583_2801 | CDS        | 2845055 | 2846410 | -                | menE              | O-succinylbenzoate-CoA ligase                                  |
| G2583_2802 | CDS        | 2846407 | 2847369 | -                | menC              | o-succinylbenzoate synthase (OSB synthase) (OSBS) (4- (2'-     |
| G2583_2803 | CDS        | 2847369 | 2848226 | -                | menB              | Naphthoate synthase                                            |
| G2583_2804 | CDS        | 2848241 | 2848999 | -                | yfbB              | 2-succinyl-6-hydroxy-2,4-cyclohexadiene-1-carboxylate          |
| G2583_2805 | CDS        | 2848996 | 2850666 | -                | menD              | 2-succinyl-5-enolpyruvyl-6-hydroxy-3-cyclohexene-1-            |
| G2583_2806 | CDS        | 2850755 | 2852050 | -                | menF              | Isochorismate synthase, menaquinone-specific                   |
| G2583_2807 | CDS        | 2852129 | 2852434 | -                | elaB              | regulatory protein AmpE                                        |
| G2583_2808 | CDS        | 2852489 | 2852950 | -                | elaA              | Acetyltransferase, GNAT family                                 |
| G2583_2809 | CDS        | 2852997 | 2853932 | +                | rbn               | ribonuclease Z                                                 |
| G2583_2810 | pseudogene | 2854120 | 2855334 | +                | elaD              | putative sulfatase / phosphatase                               |
| G2583_2811 | CDS        | 2855983 | 2856363 | +                | yfbL              | Peptidase, M28 family                                          |
| G2583_2812 | CDS        | 2856466 | 2856969 | +                | yfbM              | hypothetical protein                                           |
| G2583_2813 | CDS        | 2857036 | 2858493 | -                | nuoN              | NADH-quinone oxidoreductase subunit N                          |
| G2583_2814 | CDS        | 2858500 | 2860029 | -                | nuoM              | NADH-quinone oxidoreductase subunit M                          |

| Locus_tag  | Type | Start   | End     | +/- <sup>a</sup> | Gene <sup>b</sup> | Product                                                         |
|------------|------|---------|---------|------------------|-------------------|-----------------------------------------------------------------|
| G2583_2815 | CDS  | 2860260 | 2862101 | -                | nuoL              | NADH-quinone oxidoreductase, L subunit                          |
| G2583_2816 | CDS  | 2862098 | 2862400 | -                | nuoK              | NADH-quinone oxidoreductase subunit K                           |
| G2583_2817 | CDS  | 2862397 | 2862951 | -                | nuoJ              | NADH-quinone oxidoreductase subunit J                           |
| G2583_2818 | CDS  | 2862963 | 2863505 | -                | nuoI              | NADH-quinone oxidoreductase subunit I                           |
| G2583_2819 | CDS  | 2863520 | 2864497 | -                | nuoH              | NADH-quinone oxidoreductase subunit H                           |
| G2583_2820 | CDS  | 2864494 | 2867226 | -                | nuoG              | NADH-quinone oxidoreductase                                     |
| G2583_2821 | CDS  | 2867273 | 2868610 | -                | nuoF              | NADH-quinone oxidoreductase, F subunit                          |
| G2583_2822 | CDS  | 2868607 | 2869107 | -                | nuoE              | NADH-quinone oxidoreductase, E subunit                          |
| G2583_2823 | CDS  | 2869110 | 2870912 | -                | nuoC              | NADH-quinone oxidoreductase, C/D subunit                        |
| G2583_2824 | CDS  | 2871006 | 2871668 | -                | nuoB              | NADH-quinone oxidoreductase subunit B                           |
| G2583_2825 | CDS  | 2871684 | 2872127 | -                | nuoA              | NADH-quinone oxidoreductase subunit A                           |
| G2583_2826 | CDS  | 2872758 | 2873696 | -                | lrhA              | Probable HTH-type transcriptional regulator LrhA                |
| G2583_2827 | CDS  | 2874616 | 2875833 | +                | yfbQ              | Uncharacterized aminotransferase yfbQ                           |
| G2583_2828 | CDS  | 2875917 | 2876516 | +                | yfbR              | 5'-nucleotidase yfbR                                            |
| G2583_2829 | CDS  | 2876575 | 2878407 | -                | yfbS              | Putative transport protein                                      |
| G2583_2830 | CDS  | 2878494 | 2879144 | -                | yfbT              | Sugar-phosphatase, YfbT                                         |
| G2583_2831 | CDS  | 2879155 | 2879649 | -                | yfbU              | UPF0304 protein yfbU                                            |
| G2583_2832 | CDS  | 2879732 | 2880187 | -                | yfbV              | UPF0208 membrane protein yfbV                                   |
| G2583_2833 | CDS  | 2880525 | 2881727 | +                | ackA              | Acetate kinase                                                  |
| G2583_2834 | CDS  | 2881802 | 2883946 | +                | pta               | Phosphate acetyltransferase                                     |
| G2583_2835 | CDS  | 2884136 | 2885656 | +                | yfcC              | C4-dicarboxylate anaerobic carrier protein                      |
| G2583_2836 | CDS  | 2885689 | 2886231 | -                | yfcD              | Uncharacterized Nudix hydrolase yfcD                            |
| G2583_2837 | CDS  | 2886289 | 2886843 | -                | yfcE              | Phosphodiesterase yfcE                                          |
| G2583_2838 | CDS  | 2886896 | 2887540 | -                | yfcF              | Glutathione S-transferase domain protein                        |
| G2583_2839 | CDS  | 2887676 | 2888323 | +                | yfcG              | Glutathione S-transferase                                       |
| G2583_2840 | CDS  | 2888380 | 2888742 | +                | folX              | D-erythro-7,8-dihydroneopterin triphosphate epimerase           |
| G2583_2841 | CDS  | 2888763 | 2889656 | +                | yfcH              | NAD-binding domain 4 protein                                    |
| G2583_2842 | CDS  | 2889704 | 2890594 | -                | yfcI              | hypothetical protein                                            |
| G2583_2843 | CDS  | 2890791 | 2891564 | -                | hisP              | ATP-binding component of histidine transport                    |
| G2583_2844 | CDS  | 2891572 | 2892288 | -                | hisM              | Histidine transport system permease protein hisM                |
| G2583_2845 | CDS  | 2892285 | 2892971 | -                | hisQ              | ABC-type arginine transport system, permease component          |
| G2583_2846 | CDS  | 2893061 | 2893843 | -                | hisJ              | Histidine-binding periplasmic protein precursor                 |
| G2583_2847 | CDS  | 2894064 | 2894846 | -                | argT              | Lysine-arginine-ornithine-binding periplasmic protein precursor |
| G2583_2848 | CDS  | 2895112 | 2895681 | -                | ubiX              | 3-octaprenyl-4-hydroxybenzoate carboxy-lyase                    |
| G2583_2849 | CDS  | 2895776 | 2897293 | -                | purF              | Amidophosphoribosyltransferase                                  |
| G2583_2850 | CDS  | 2897330 | 2897818 | -                | cvpA              | CvpA protein                                                    |
| G2583_2851 | CDS  | 2898441 | 2899103 | -                | dedD              | Sporulation and cell division repeat protein                    |
| G2583_2852 | CDS  | 2899093 | 2900361 | -                | folC              | Tetrahydrofolate synthase/dihydrofolate synthase                |
| G2583_2853 | CDS  | 2900431 | 2901345 | -                | accD              | Acetyl-coenzyme A carboxylase carboxyl transferase subunit      |
| G2583_2854 | CDS  | 2901501 | 2902160 | -                | dedA              | hypothetical protein                                            |
| G2583_2855 | CDS  | 2902243 | 2903055 | -                | truA              | tRNA pseudouridine synthase A                                   |
| G2583_2856 | CDS  | 2903055 | 2904068 | -                | usg               | USG-1 protein                                                   |
| G2583_2857 | CDS  | 2904134 | 2905270 | -                | pdxB              | Erythronate-4-phosphate dehydrogenase                           |
| G2583_2858 | CDS  | 2905369 | 2906364 | +                | flk               | Cell division protein                                           |
| G2583_2859 | CDS  | 2906361 | 2907539 | -                | yfcJ              | Permeases of the major facilitator superfamily                  |
| G2583_2860 | CDS  | 2907814 | 2909034 | -                | fabB              | 3-oxoacyl-[acyl-carrier-protein] synthase 1                     |
| G2583_2861 | CDS  | 2909193 | 2911199 | +                | mnmC              | UPF0209 protein yfcK                                            |
| G2583_2862 | CDS  | 2911320 | 2911598 | -                | yfcL              | hypothetical protein                                            |
| G2583_2863 | CDS  | 2911632 | 2912180 | -                | yfcM              | putative transporting ATPase                                    |
| G2583_2864 | CDS  | 2912180 | 2912989 | -                | yfcA              | Inner membrane protein yfcA                                     |
| G2583_2865 | CDS  | 2912989 | 2913813 | -                | mepA              | Penicillin-insensitive murein endopeptidase precursor           |
| G2583_2866 | CDS  | 2913817 | 2914902 | -                | aroC              | Chorismate synthase                                             |
| G2583_2867 | CDS  | 2914937 | 2916202 | -                | prmB              | Putative adenine-specific methylase                             |
| G2583_2868 | CDS  | 2916035 | 2916586 | +                | yfcN              | UPF0115 protein yfcN                                            |
| G2583_2869 | CDS  | 2916757 | 2917599 | -                | yfcO              | hypothetical protein                                            |
| G2583_2870 | CDS  | 2917601 | 2918149 | -                | yfcP              | Fimbrial protein                                                |
| G2583_2871 | CDS  | 2918119 | 2918589 | -                | yfcQ              | Fimbrial subunit                                                |
| G2583_2872 | CDS  | 2918586 | 2919179 | -                | yfcR              | Putative minor fimbrial subunit                                 |
| G2583_2873 | CDS  | 2919097 | 2919855 | -                | yfcS              | Chaperone protein PapD                                          |
| G2583_2874 | CDS  | 2919878 | 2922517 | -                | yfcU              | Fimbrial usher family protein                                   |



| Locus_tag  | Type | Start   | End     | +/- <sup>a</sup> | Gene <sup>b</sup> | Product                                                     |
|------------|------|---------|---------|------------------|-------------------|-------------------------------------------------------------|
| G2583_2875 | CDS  | 2922599 | 2923162 | -                | yfcV              | Fimbrial protein                                            |
| G2583_2876 | CDS  | 2923808 | 2924293 | -                | sixA              | Phosphohistidine phosphatase SixA                           |
| G2583_2877 | CDS  | 2924496 | 2926640 | -                | fadJ              | Fatty oxidation complex, alpha subunit FadJ                 |
| G2583_2878 | CDS  | 2926640 | 2927950 | -                | fadI              | 3-ketoacyl-CoA thiolase                                     |
| G2583_2879 | CDS  | 2928130 | 2928438 | -                | yfcZ              | hypothetical protein                                        |
| G2583_2880 | CDS  | 2928780 | 2930126 | +                | fadL              | Transport of long-chain fatty acids                         |
| G2583_2881 | CDS  | 2930491 | 2931522 | +                | yfdF              | hypothetical protein                                        |
| G2583_2882 | CDS  | 2931917 | 2932672 | -                | vacJ              | Lipoprotein, VacJ family                                    |
| G2583_2883 | CDS  | 2932966 | 2933898 | +                | yfdC              | putative transport                                          |
| G2583_2884 | tRNA | 2933997 | 2934049 | +                | -                 | Arg tRNA                                                    |
| G2583_2885 | CDS  | 2934174 | 2935367 | +                | intS              | putative prophage integrase                                 |
| G2583_2886 | CDS  | 2935542 | 2936678 | -                | -                 | Putative prophage DNA injection protein                     |
| G2583_2887 | CDS  | 2936688 | 2937368 | -                | -                 | Phage DNA transfer protein                                  |
| G2583_2888 | CDS  | 2937355 | 2937822 | -                | -                 | hypothetical protein                                        |
| G2583_2889 | CDS  | 2937822 | 2938391 | -                | -                 | Gene 9 protein                                              |
| G2583_2890 | CDS  | 2938374 | 2939069 | +                | -                 | hypothetical protein                                        |
| G2583_2891 | CDS  | 2939739 | 2941151 | -                | -                 | hypothetical protein                                        |
| G2583_2892 | CDS  | 2941338 | 2941514 | -                | -                 | hypothetical protein                                        |
| G2583_2893 | CDS  | 2941817 | 2942443 | +                | -                 | Resolvase domain protein                                    |
| G2583_2894 | CDS  | 2943041 | 2944288 | -                | -                 | Oligosaccharide:H <sup>+</sup> symporter                    |
| G2583_2895 | CDS  | 2944360 | 2945274 | -                | cscK              | Fructokinase                                                |
| G2583_2896 | CDS  | 2945490 | 2946923 | +                | -                 | Sucrose-6-phosphate hydrolase                               |
| G2583_2897 | CDS  | 2946931 | 2947989 | -                | -                 | Sugar binding transcriptional regulator, LacI family        |
| G2583_2898 | CDS  | 2948169 | 2948387 | +                | dsdX              | Putative uncharacterized dsdX-like protein                  |
| G2583_2899 | CDS  | 2948507 | 2949535 | +                | dsdA              | D-serine ammonia-lyase                                      |
| G2583_2900 | CDS  | 2949841 | 2951379 | -                | emrY              | Multidrug resistance protein Y                              |
| G2583_2901 | CDS  | 2951379 | 2952542 | -                | emrK              | Drug resistance MFS transporter, membrane fusion protein    |
| G2583_2902 | CDS  | 2952958 | 2953572 | +                | evgA              | Positive transcription regulator evgA                       |
| G2583_2903 | CDS  | 2953577 | 2957170 | +                | evgS              | hybrid sensory histidine kinase in two-component regulatory |
| G2583_2904 | CDS  | 2957226 | 2958410 | -                | yfdE              | hypothetical protein                                        |
| G2583_2905 | CDS  | 2958445 | 2959389 | -                | yfdV              | Uncharacterized transporter yfdV                            |
| G2583_2906 | CDS  | 2959459 | 2961153 | -                | oxc               | Thiamine pyrophosphate-dependent enzyme                     |
| G2583_2907 | CDS  | 2961207 | 2962457 | -                | frc               | Formyl-coenzyme A transferase                               |
| G2583_2908 | CDS  | 2962970 | 2963605 | -                | yfdX              | Protein yfdX precursor                                      |
| G2583_2909 | CDS  | 2963949 | 2964176 | +                | ypdI              | hypothetical protein                                        |
| G2583_2910 | CDS  | 2964253 | 2964495 | -                | yfdY              | hypothetical protein                                        |
| G2583_2911 | CDS  | 2964848 | 2965768 | +                | lpxP              | hypothetical protein                                        |
| G2583_2912 | CDS  | 2966260 | 2967498 | -                | yfdZ              | Aminotransferase, classes I and II                          |
| G2583_2913 | CDS  | 2967875 | 2969572 | +                | ypdA              | Inner membrane protein ypdA                                 |
| G2583_2914 | CDS  | 2969587 | 2970321 | +                | ypdB              | Uncharacterized response regulatory protein ypdB            |
| G2583_2915 | CDS  | 2970334 | 2971191 | +                | ypdC              | helix-turn-helix- domain containing protein AraC type       |
| G2583_2916 | CDS  | 2971194 | 2973689 | -                | fryA              | Putative phosphoenolpyruvate-protein phosphotransferase     |
| G2583_2917 | CDS  | 2973714 | 2974751 | -                | ypdE              | Aminopeptidase                                              |
| G2583_2918 | CDS  | 2974751 | 2975836 | -                | ypdF              | Aminopeptidase YpdF                                         |
| G2583_2919 | CDS  | 2975851 | 2977098 | -                | fryC              | Fructose-like permease IIC component                        |
| G2583_2920 | CDS  | 2977120 | 2977446 | -                | fryB              | Fructose-like phosphotransferase enzyme IIB component 1     |
| G2583_2921 | CDS  | 2977665 | 2978630 | -                | glk               | Glucokinase                                                 |
| G2583_2922 | CDS  | 2978834 | 2980090 | +                | yfeO              | Putative ion-transport protein yfeO                         |
| G2583_2923 | CDS  | 2980205 | 2980531 | +                | ypeC              | conserved hypothetical protein                              |
| G2583_2924 | CDS  | 2980380 | 2980613 | +                | -                 | hypothetical protein                                        |
| G2583_2925 | CDS  | 2980671 | 2981909 | -                | mntH              | Manganese transport protein mntH                            |
| G2583_2926 | CDS  | 2982245 | 2983447 | +                | nupC              | Nucleoside transporter NupC                                 |
| G2583_2927 | CDS  | 2983497 | 2985725 | -                | yfeA              | hypothetical protein                                        |
| G2583_2928 | tRNA | 2985893 | 2985970 | -                | -                 | Ala tRNA                                                    |
| G2583_2929 | tRNA | 2986009 | 2986084 | -                | -                 | Ala tRNA                                                    |
| G2583_2930 | CDS  | 2986305 | 2986664 | +                | yfeC              | hypothetical protein                                        |
| G2583_2931 | CDS  | 2986666 | 2987058 | +                | yfeD              | hypothetical protein                                        |
| G2583_2932 | CDS  | 2987098 | 2988306 | -                | ydcM              | IS605 family transposase orfB                               |
| G2583_2933 | CDS  | 2988314 | 2988856 | +                | -                 | Putative transposase TnA                                    |
| G2583_2934 | CDS  | 2988857 | 2990272 | -                | gltX              | Glutamyl-tRNA synthetase                                    |

| Locus_tag  | Type | Start   | End     | +/- <sup>a</sup> | Gene <sup>b</sup> | Product                                                      |
|------------|------|---------|---------|------------------|-------------------|--------------------------------------------------------------|
| G2583_2935 | tRNA | 2990531 | 2990606 | +                | -                 | Val tRNA                                                     |
| G2583_2936 | tRNA | 2990650 | 2990727 | +                | -                 | Val tRNA                                                     |
| G2583_2937 | tRNA | 2990772 | 2990849 | +                | -                 | Val tRNA                                                     |
| G2583_2938 | tRNA | 2990853 | 2990928 | +                | -                 | Lys tRNA                                                     |
| G2583_2939 | CDS  | 2991048 | 2991389 | +                | flxA              | hypothetical protein                                         |
| G2583_2940 | CDS  | 2991380 | 2992306 | -                | yfeR              | transcriptional regulator, LysR family protein               |
| G2583_2941 | CDS  | 2992396 | 2993394 | +                | yfeH              | putative cytochrome oxidase                                  |
| G2583_2942 | CDS  | 2993391 | 2993609 | -                | ypeB              | hypothetical protein                                         |
| G2583_2943 | CDS  | 2993611 | 2995626 | -                | ligA              | DNA ligase                                                   |
| G2583_2944 | CDS  | 2995697 | 2996695 | -                | zipA              | Cell division protein ZipA                                   |
| G2583_2945 | CDS  | 2996925 | 2997686 | +                | cysZ              | putative sulfate transport protein CysZ                      |
| G2583_2946 | CDS  | 2997871 | 2998842 | +                | cysK              | Cysteine synthase A (O-acetylserine sulfhydrylase A) (CSase) |
| G2583_2947 | CDS  | 2999226 | 2999483 | +                | ptsH              | PTS system, phosphocarrier protein                           |
| G2583_2948 | CDS  | 2999528 | 3001255 | +                | ptsl              | Phosphoenolpyruvate-protein phosphotransferase               |
| G2583_2949 | CDS  | 3001296 | 3001805 | +                | crr               | Glucose-specific phosphotransferase enzyme IIA component     |
| G2583_2950 | CDS  | 3001848 | 3002699 | -                | pdxK              | pyridoxal kinase                                             |
| G2583_2951 | CDS  | 3002804 | 3003136 | +                | yfeK              | hypothetical protein                                         |
| G2583_2952 | CDS  | 3003174 | 3004085 | -                | cysM              | Cysteine synthase                                            |
| G2583_2953 | CDS  | 3004219 | 3005316 | -                | cysA              | Sulfate/thiosulfate import ATP-binding protein cysA          |
| G2583_2954 | CDS  | 3005306 | 3006181 | -                | cysW              | Sulfate ABC transporter, permease protein CysW               |
| G2583_2955 | CDS  | 3006181 | 3007014 | -                | cysU              | Sulfate ABC transporter, permease protein CysT               |
| G2583_2956 | CDS  | 3007014 | 3008030 | -                | cysP              | Sulfate/thiosulfate ABC transporter, periplasmic             |
| G2583_2957 | CDS  | 3008188 | 3008979 | -                | ucpA              | Oxidoreductase ucpA                                          |
| G2583_2958 | CDS  | 3009108 | 3009965 | -                | yfeT              | hypothetical protein                                         |
| G2583_2959 | CDS  | 3010129 | 3011025 | +                | murQ              | Predicted sugar phosphate isomerase                          |
| G2583_2960 | CDS  | 3011029 | 3012453 | +                | murP              | Phosphoenolpyruvate-dependent sugar phosphotransferase       |
| G2583_2961 | CDS  | 3012458 | 3013762 | +                | yfeW              | Putative hydrolase/beta lactamase fusion protein             |
| G2583_2962 | CDS  | 3013820 | 3014746 | -                | yfeX              | hypothetical protein                                         |
| G2583_2963 | CDS  | 3014815 | 3015390 | -                | yfeY              | hypothetical protein                                         |
| G2583_2964 | CDS  | 3015451 | 3015906 | -                | yfeZ              | hypothetical protein                                         |
| G2583_2965 | CDS  | 3015887 | 3016423 | -                | ypeA              | Acetyltransferase ypeA                                       |
| G2583_2966 | CDS  | 3016526 | 3017395 | +                | amiA              | N-acetylmuramoyl-L-alanine amidase                           |
| G2583_2967 | CDS  | 3017399 | 3018298 | +                | hemF              | Coproporphyrinogen III oxidase, aerobic                      |
| G2583_2968 | CDS  | 3018304 | 3019356 | -                | eutR              | AraC-type DNA-binding domain-containing proteins             |
| G2583_2969 | CDS  | 3019402 | 3019908 | -                | eutK              | Ethanolamine utilization protein EutK                        |
| G2583_2970 | CDS  | 3019915 | 3020574 | -                | eutL              | Putative ethanolamine utilization protein EutL               |
| G2583_2971 | CDS  | 3020584 | 3021471 | -                | eutC              | Ethanolamine ammonia-lyase light chain                       |
| G2583_2972 | CDS  | 3021492 | 3022853 | -                | eutB              | Ethanolamine ammonia-lyase heavy chain                       |
| G2583_2973 | CDS  | 3022865 | 3024268 | -                | eutA              | Ethanolamine utilization protein EutA                        |
| G2583_2974 | CDS  | 3024265 | 3025491 | -                | eutH              | EutH                                                         |
| G2583_2975 | CDS  | 3025591 | 3026805 | -                | eutG              | EutG                                                         |
| G2583_2976 | CDS  | 3026768 | 3027604 | -                | eutJ              | Ethanolamine utilization protein EutJ                        |
| G2583_2977 | CDS  | 3027615 | 3029018 | -                | eutE              | Ethanolamine utilization                                     |
| G2583_2978 | CDS  | 3029030 | 3029317 | -                | eutN              | Ethanolamine utilization protein                             |
| G2583_2979 | CDS  | 3029424 | 3029717 | -                | eutM              | Detox protein                                                |
| G2583_2980 | CDS  | 3029756 | 3030772 | -                | eutD              | Ethanolamine utilization protein EutD                        |
| G2583_2981 | CDS  | 3030769 | 3031500 | -                | eutT              | Ethanolamine utilization cobalamin adenosyltransferase       |
| G2583_2982 | CDS  | 3031497 | 3032198 | -                | eutQ              | Ethanolamine utilization protein EutQ                        |
| G2583_2983 | CDS  | 3032173 | 3032652 | -                | eutP              | hypothetical protein                                         |
| G2583_2984 | CDS  | 3032665 | 3033072 | -                | eutS              | hypothetical protein                                         |
| G2583_2985 | CDS  | 3033293 | 3035572 | -                | maeB              | Malate dehydrogenase (Oxaloacetate-decarboxylating)          |
| G2583_2986 | CDS  | 3035861 | 3036811 | +                | talA              | Transaldolase A                                              |
| G2583_2987 | CDS  | 3036831 | 3038834 | +                | tktB              | Transketolase 2                                              |
| G2583_2988 | CDS  | 3038929 | 3039972 | -                | ypfG              | hypothetical protein                                         |
| G2583_2989 | CDS  | 3040098 | 3040673 | -                | nudK              | GDP-mannose pyrophosphatase nudK                             |
| G2583_2990 | CDS  | 3040741 | 3042720 | -                | aegA              | putative oxidoreductase Fe-S binding subunit                 |
| G2583_2991 | CDS  | 3042926 | 3044626 | +                | narQ              | Nitrate/nitrite sensor histidine kinase NarQ                 |
| G2583_2992 | CDS  | 3044790 | 3047903 | +                | acrD              | Probable aminoglycoside efflux pump                          |
| G2583_2993 | CDS  | 3048442 | 3048798 | +                | yffB              | ArsC family protein                                          |
| G2583_2994 | CDS  | 3048802 | 3049929 | +                | dapE              | Succinyl-diaminopimelate desuccinylase                       |

| Locus_tag  | Type  | Start   | End     | +/- <sup>a</sup> | Gene <sup>b</sup> | Product                                                  |
|------------|-------|---------|---------|------------------|-------------------|----------------------------------------------------------|
| G2583_2995 | CDS   | 3049957 | 3050157 | +                | ypfN              | UPF0370 protein ypfN                                     |
| G2583_2996 | CDS   | 3050238 | 3050936 | -                | ypfH              | Esterase, AB hydrolase 2 family                          |
| G2583_2997 | CDS   | 3051010 | 3053025 | -                | ypfI              | hypothetical protein                                     |
| G2583_2998 | CDS   | 3053040 | 3053903 | -                | ypfJ              | hypothetical protein                                     |
| G2583_2999 | CDS   | 3054071 | 3054784 | -                | purC              | Phosphoribosylaminoimidazole-succinocarboxamide synthase |
| G2583_3000 | CDS   | 3054997 | 3056034 | -                | nlpB              | Lipoprotein-34                                           |
| G2583_3001 | CDS   | 3056048 | 3056926 | -                | dapA              | Dihydrodipicolinate synthase                             |
| G2583_3002 | CDS   | 3057072 | 3057644 | +                | gcvR              | Glycine cleavage system transcriptional repressor        |
| G2583_3003 | CDS   | 3057644 | 3058114 | +                | bcp               | Putative peroxiredoxin bcp                               |
| G2583_3004 | CDS   | 3058328 | 3058984 | +                | hyfA              | Hydrogenase 4 Fe-S subunit                               |
| G2583_3005 | CDS   | 3058984 | 3061002 | +                | hyfB              | Hydrogenase 4 membrane subunit                           |
| G2583_3006 | CDS   | 3060992 | 3061960 | +                | hyfC              | Hydrogenase 4 membrane subunit                           |
| G2583_3007 | CDS   | 3061977 | 3063416 | +                | hyfD              | Hydrogenase-4 component D                                |
| G2583_3008 | CDS   | 3063428 | 3064072 | +                | hyfE              | Hydrogenase-4 component E                                |
| G2583_3009 | CDS   | 3064077 | 3065657 | +                | hyfF              | Hydrogenase 4 membrane subunit                           |
| G2583_3010 | CDS   | 3065647 | 3067362 | +                | hyfG              | Hydrogenase-4, G subunit                                 |
| G2583_3011 | CDS   | 3067372 | 3067917 | +                | hyfH              | Iron-sulfur cluster-binding protein                      |
| G2583_3012 | CDS   | 3067914 | 3068672 | +                | hyfI              | Hydrogenase-4, I subunit                                 |
| G2583_3013 | CDS   | 3068602 | 3069078 | +                | hyfJ              | putative protein processing element                      |
| G2583_3014 | CDS   | 3069108 | 3071120 | +                | hyfR              | Hydrogenase-4 transcriptional regulator                  |
| G2583_3015 | CDS   | 3071142 | 3071990 | +                | focB              | Formate/nitrite transporter                              |
| G2583_3016 | CDS   | 3072028 | 3073089 | -                | yfgO              | Putative permease perM                                   |
| G2583_3017 | CDS   | 3073302 | 3074765 | +                | yfgC              | Peptidase, M48 family                                    |
| G2583_3018 | CDS   | 3074786 | 3075145 | +                | yfgD              | Arsenate reductase                                       |
| G2583_3019 | CDS   | 3075283 | 3076029 | -                | hda               | DnaA-homolog protein hda                                 |
| G2583_3020 | CDS   | 3076079 | 3077368 | -                | uraA              | Uracil permease                                          |
| G2583_3021 | CDS   | 3077454 | 3078080 | -                | upp               | Uracil phosphoribosyltransferase                         |
| G2583_3022 | CDS   | 3078405 | 3079442 | +                | purM              | Phosphoribosylformylglycinamide cyclo-ligase             |
| G2583_3023 | CDS   | 3079442 | 3080080 | +                | purN              | Phosphoribosylglycinamide formyltransferase 1            |
| G2583_3024 | CDS   | 3080251 | 3082317 | +                | ppk               | Polyphosphate kinase                                     |
| G2583_3025 | CDS   | 3082322 | 3083863 | +                | ppx               | exopolyphosphatase                                       |
| G2583_3026 | CDS   | 3083902 | 3086145 | -                | yfgF              | Putative cytochrome C-type biogenesis protein            |
| G2583_3027 | CDS   | 3086327 | 3086479 | -                | -                 | hypothetical protein                                     |
| G2583_3028 | CDS   | 3086497 | 3086688 | +                | yfgG              | hypothetical protein                                     |
| G2583_3029 | CDS   | 3086999 | 3087517 | +                | yfgH              | Uncharacterized lipoprotein yfgH precursor               |
| G2583_3030 | CDS   | 3087533 | 3088072 | +                | yfgI              | hypothetical protein                                     |
| G2583_3031 | CDS   | 3088165 | 3089742 | -                | guaA              | GMP synthase [glutamine-hydrolyzing]                     |
| G2583_3032 | CDS   | 3089811 | 3091277 | -                | guaB              | Inosine-5'-monophosphate dehydrogenase                   |
| G2583_3033 | CDS   | 3091439 | 3092809 | +                | xseA              | Exodeoxyribonuclease 7 large subunit                     |
| G2583_3034 | CDS   | 3092806 | 3093021 | -                | yfgJ              | hypothetical protein                                     |
| G2583_3035 | CDS   | 3093090 | 3094562 | -                | der               | GTP-binding protein engA                                 |
| G2583_3036 | CDS   | 3094680 | 3095858 | -                | yfgL              | Outer membrane assembly lipoprotein YfgL                 |
| G2583_3037 | CDS   | 3095869 | 3096489 | -                | yfgM              | UPF0070 protein yfgM                                     |
| G2583_3038 | CDS   | 3096507 | 3097781 | -                | hisS              | Histidyl-tRNA synthetase                                 |
| G2583_3039 | ncRNA | 3097801 | 3097892 | -                | -                 | ncRNA                                                    |
| G2583_3040 | CDS   | 3097892 | 3099010 | -                | ispG              | 4-hydroxy-3-methylbut-2-en-1-yl diphosphate synthase (1- |
| G2583_3041 | CDS   | 3099037 | 3100050 | -                | yfgA              | Helix-turn-helix DNA-binding domain protein              |
| G2583_3042 | CDS   | 3100335 | 3101489 | -                | yfgB              | Radical SAM enzyme, Cfr family                           |
| G2583_3043 | CDS   | 3101639 | 3102070 | -                | ndk               | Nucleoside diphosphate kinase                            |
| G2583_3044 | CDS   | 3102211 | 3103065 | -                | -                 | Putative polyferredoxin                                  |
| G2583_3045 | CDS   | 3103065 | 3103886 | -                | ynfH              | Putative dimethyl sulfoxide reductase subunit C          |
| G2583_3046 | CDS   | 3103879 | 3104508 | -                | -                 | Dimethylsulfoxide reductase, chain B                     |
| G2583_3047 | CDS   | 3104505 | 3106886 | -                | dmsA              | putative anaerobic dimethyl sulfoxide reductase chain A  |
| G2583_3048 | CDS   | 3107050 | 3109362 | -                | pbpC              | Penicillin-binding protein 1C                            |
| G2583_3049 | CDS   | 3109363 | 3114324 | -                | yfhM              | Alpha-2-macroglobulin domain protein                     |
| G2583_3050 | CDS   | 3114531 | 3115376 | +                | sseA              | Putative thiosulfate sulfurtransferase                   |
| G2583_3051 | ncRNA | 3115573 | 3115877 | +                | -                 | ncRNA                                                    |
| G2583_3052 | CDS   | 3115876 | 3116661 | -                | sseB              | Enhanced serine sensitivity                              |
| G2583_3053 | CDS   | 3116795 | 3118078 | -                | pepB              | Peptidase B                                              |
| G2583_3054 | CDS   | 3118256 | 3118456 | -                | iscX              | hypothetical protein                                     |

| Locus_tag  | Type  | Start   | End     | +/- <sup>a</sup> | Gene <sup>b</sup> | Product                                                        |
|------------|-------|---------|---------|------------------|-------------------|----------------------------------------------------------------|
| G2583_3055 | CDS   | 3118468 | 3118803 | -                | fdx               | 2Fe-2S ferredoxin                                              |
| G2583_3056 | CDS   | 3118805 | 3120655 | -                | hscA              | Chaperone protein hscA                                         |
| G2583_3057 | CDS   | 3120672 | 3121187 | -                | hscB              | Fe-S protein assembly co-chaperone HscB                        |
| G2583_3058 | CDS   | 3121283 | 3121606 | -                | iscA              | Iron-binding protein iscA                                      |
| G2583_3059 | CDS   | 3121623 | 3122009 | -                | iscU              | NifU-like protein                                              |
| G2583_3060 | CDS   | 3122037 | 3123275 | -                | iscS              | Cysteine desulfurase                                           |
| G2583_3061 | CDS   | 3123363 | 3123851 | -                | iscR              | DNA-binding transcriptional repressor                          |
| G2583_3062 | CDS   | 3124152 | 3124889 | -                | trmJ              | tRNA (cytidine/uridine-2'-O-)-methyltransferase trmJ           |
| G2583_3063 | CDS   | 3125008 | 3125811 | +                | suhB              | Inositol-1-monophosphatase                                     |
| G2583_3064 | CDS   | 3125929 | 3126810 | +                | yfhR              | putative enzyme (3.4.-)                                        |
| G2583_3065 | CDS   | 3127001 | 3128281 | +                | csiE              | Transcriptional antiterminator                                 |
| G2583_3066 | CDS   | 3128273 | 3129412 | -                | hcaT              | 3-phenylpropionic acid transporter                             |
| G2583_3067 | CDS   | 3129572 | 3130465 | -                | hcaR              | Hca operon transcriptional activator                           |
| G2583_3068 | CDS   | 3130598 | 3131959 | +                | hcaE              | 3-phenylpropionate/cinnamic acid dioxygenase subunit alpha     |
| G2583_3069 | CDS   | 3131956 | 3132474 | +                | hcaF              | 3-phenylpropionate/cinnamic acid dioxygenase subunit beta      |
| G2583_3070 | CDS   | 3132474 | 3132794 | +                | hcaC              | 3-phenylpropionate/cinnamic acid dioxygenase ferredoxin        |
| G2583_3071 | CDS   | 3132791 | 3133603 | +                | hcaB              | 3-phenylpropionate-dihydrodiol/cinnamic acid-dihydrodiol       |
| G2583_3072 | CDS   | 3133613 | 3134815 | +                | hcaD              | 3-phenylpropionate/cinnamic acid dioxygenase ferredoxin--      |
| G2583_3073 | CDS   | 3134867 | 3135334 | +                | yphA              | Predicted inner membrane protein                               |
| G2583_3074 | CDS   | 3135382 | 3136254 | -                | yphB              | Aldose 1-epimerase family protein                              |
| G2583_3075 | CDS   | 3136266 | 3137360 | -                | yphC              | Hypothetical zinc-type alcohol dehydrogenase-like protein yphC |
| G2583_3076 | CDS   | 3137393 | 3138391 | -                | yphD              | Putative transport system permease protein                     |
| G2583_3077 | CDS   | 3138416 | 3139927 | -                | yphE              | Putative sugar ABC transporter, ATP-binding protein            |
| G2583_3078 | CDS   | 3139950 | 3140933 | -                | yphF              | Periplasmic binding protein/LacI transcriptional regulator     |
| G2583_3079 | CDS   | 3141030 | 3144404 | -                | yphG              | hypothetical protein                                           |
| G2583_3080 | CDS   | 3144423 | 3145622 | +                | yphH              | ROK family protein                                             |
| G2583_3081 | CDS   | 3145685 | 3146938 | -                | glyA              | Serine hydroxymethyltransferase                                |
| G2583_3082 | CDS   | 3147266 | 3148456 | +                | hmp               | Flavoheomprotein                                               |
| G2583_3083 | CDS   | 3148501 | 3148839 | -                | glnB              | Nitrogen regulatory protein P-II 1                             |
| G2583_3084 | CDS   | 3148900 | 3150234 | -                | yfhA              | putative 2-component transcriptional regulator                 |
| G2583_3085 | CDS   | 3150224 | 3150937 | -                | yfhG              | hypothetical protein                                           |
| G2583_3086 | CDS   | 3151102 | 3152592 | -                | yfhK              | putative 2-component sensor protein                            |
| G2583_3087 | ncRNA | 3152623 | 3152771 | +                | -                 | ncRNA                                                          |
| G2583_3088 | CDS   | 3153105 | 3156992 | -                | purL              | Phosphoribosylformylglycinamide synthase                       |
| G2583_3089 | CDS   | 3157249 | 3158805 | +                | yfhD              | Predicted soluble lytic transglycosylase fused to an ABC-type  |
| G2583_3090 | CDS   | 3158802 | 3159338 | -                | tadA              | tRNA-specific adenosine deaminase                              |
| G2583_3091 | CDS   | 3159363 | 3159998 | -                | yfhB              | HAD hydrolase YfhB                                             |
| G2583_3092 | CDS   | 3160207 | 3161055 | +                | yfhH              | hypothetical protein                                           |
| G2583_3093 | CDS   | 3161922 | 3162341 | +                | -                 | hypothetical protein                                           |
| G2583_3094 | CDS   | 3162414 | 3162998 | -                | pinE              | DNA invertase from prophage CP-933H                            |
| G2583_3095 | CDS   | 3162992 | 3163390 | +                | yfdL              | putative tail fiber protein                                    |
| G2583_3096 | CDS   | 3163394 | 3163813 | +                | yfdK              | tail fiber assembly protein                                    |
| G2583_3097 | CDS   | 3163785 | 3164390 | -                | -                 | hypothetical protein                                           |
| G2583_3098 | CDS   | 3164387 | 3165232 | -                | -                 | Phage-related tail fibre protein                               |
| G2583_3099 | CDS   | 3165232 | 3165912 | -                | -                 | putative bacteriophage protein                                 |
| G2583_3100 | CDS   | 3165909 | 3167108 | -                | -                 | phage Mu protein gp 47                                         |
| G2583_3101 | CDS   | 3167108 | 3167461 | -                | -                 | putative bacteriophage protein                                 |
| G2583_3102 | CDS   | 3167461 | 3168213 | -                | -                 | Phage P2 baseplate assembly protein gpV                        |
| G2583_3103 | CDS   | 3169012 | 3169359 | -                | -                 | Putative secreted protein precursor                            |
| G2583_3104 | CDS   | 3169362 | 3170426 | -                | -                 | hypothetical protein                                           |
| G2583_3105 | CDS   | 3170429 | 3170731 | -                | -                 | Putative bacteriophage protein                                 |
| G2583_3106 | CDS   | 3170731 | 3171228 | -                | -                 | putative bacteriophage protein                                 |
| G2583_3107 | CDS   | 3171318 | 3173306 | -                | -                 | Putative bacteriophage protein                                 |
| G2583_3108 | CDS   | 3173484 | 3173936 | -                | -                 | Putative bacteriophage protein                                 |
| G2583_3109 | CDS   | 3173940 | 3174380 | -                | -                 | Putative bacteriophage protein                                 |
| G2583_3110 | CDS   | 3174391 | 3175536 | -                | -                 | Hypothetical prophage protein                                  |
| G2583_3111 | CDS   | 3175540 | 3176088 | -                | -                 | Putative bacteriophage protein                                 |
| G2583_3112 | CDS   | 3176078 | 3176392 | -                | -                 | Putative bacteriophage protein                                 |
| G2583_3113 | CDS   | 3176454 | 3177008 | -                | -                 | Putative bacteriophage protein                                 |
| G2583_3114 | CDS   | 3177005 | 3177412 | -                | -                 | hypothetical protein                                           |

| Locus_tag  | Type | Start   | End     | +/- <sup>a</sup> | Gene <sup>b</sup> | Product                                                |
|------------|------|---------|---------|------------------|-------------------|--------------------------------------------------------|
| G2583_3115 | CDS  | 3177378 | 3177746 | -                | -                 | Putative bacteriophage protein                         |
| G2583_3116 | CDS  | 3177787 | 3178728 | -                | -                 | Putative bacteriophage protein                         |
| G2583_3117 | CDS  | 3178740 | 3179246 | -                | -                 | Putative bacteriophage protein                         |
| G2583_3118 | CDS  | 3179250 | 3180470 | -                | -                 | Uncharacterized protein conserved in bacteria          |
| G2583_3119 | CDS  | 3180485 | 3181015 | -                | -                 | phage Mu protein gp30                                  |
| G2583_3120 | CDS  | 3181110 | 3182576 | -                | -                 | Uncharacterized protein conserved in bacteria          |
| G2583_3121 | CDS  | 3182576 | 3184198 | -                | -                 | hypothetical protein                                   |
| G2583_3122 | CDS  | 3184201 | 3184773 | -                | -                 | Phage terminase, small subunit                         |
| G2583_3123 | CDS  | 3184835 | 3185359 | -                | -                 | conserved hypothetical protein                         |
| G2583_3124 | CDS  | 3185343 | 3185819 | -                | -                 | Lysozyme                                               |
| G2583_3125 | CDS  | 3185823 | 3186164 | -                | -                 | phage holin, lambda family                             |
| G2583_3126 | CDS  | 3186610 | 3186774 | -                | -                 | hypothetical protein                                   |
| G2583_3127 | CDS  | 3186983 | 3187405 | -                | -                 | Transcriptional regulator                              |
| G2583_3128 | CDS  | 3187690 | 3189876 | -                | -                 | Predicted P-loop ATPase and inactivated derivatives    |
| G2583_3129 | CDS  | 3190162 | 3190836 | +                | -                 | hypothetical protein                                   |
| G2583_3130 | CDS  | 3191470 | 3191619 | +                | -                 | hypothetical protein                                   |
| G2583_3131 | CDS  | 3191616 | 3192518 | +                | -                 | hypothetical protein                                   |
| G2583_3132 | CDS  | 3192521 | 3193822 | +                | -                 | Bbp38                                                  |
| G2583_3133 | CDS  | 3193838 | 3194386 | +                | -                 | hypothetical protein                                   |
| G2583_3134 | CDS  | 3194439 | 3195068 | -                | -                 | hypothetical protein                                   |
| G2583_3135 | CDS  | 3195115 | 3197178 | +                | dpoL              | DNA polymerase I - 3'→5' exonuclease and polymerase    |
| G2583_3136 | CDS  | 3197779 | 3198330 | +                | -                 | hypothetical protein                                   |
| G2583_3137 | CDS  | 3198373 | 3198642 | +                | -                 | Phage associated protein                               |
| G2583_3138 | CDS  | 3198648 | 3199358 | -                | -                 | hypothetical protein                                   |
| G2583_3139 | CDS  | 3199397 | 3200788 | +                | -                 | Superfamily II DNA/RNA helicases, SNF2 family          |
| G2583_3140 | CDS  | 3200785 | 3200985 | +                | -                 | hypothetical protein                                   |
| G2583_3141 | CDS  | 3200982 | 3202379 | -                | -                 | Integrase                                              |
| G2583_3142 | CDS  | 3202594 | 3202854 | +                | yfhL              | hypothetical protein                                   |
| G2583_3143 | CDS  | 3203125 | 3203277 | -                | -                 | hypothetical protein                                   |
| G2583_3144 | CDS  | 3203550 | 3203930 | -                | acpS              | Holo-[acyl-carrier-protein] synthase                   |
| G2583_3145 | CDS  | 3203930 | 3204661 | -                | pdxJ              | Pyridoxine 5'-phosphate synthase                       |
| G2583_3146 | CDS  | 3204673 | 3205401 | -                | recO              | DNA repair protein recO                                |
| G2583_3147 | CDS  | 3205413 | 3206318 | -                | era               | GTP-binding protein era                                |
| G2583_3148 | CDS  | 3206315 | 3206995 | -                | rnc               | Ribonuclease 3                                         |
| G2583_3149 | CDS  | 3207053 | 3207217 | +                | -                 | hypothetical protein                                   |
| G2583_3150 | CDS  | 3207268 | 3208242 | -                | lepB              | Signal peptidase I                                     |
| G2583_3151 | CDS  | 3208258 | 3210057 | -                | lepA              | GTP-binding protein lepA                               |
| G2583_3152 | CDS  | 3210255 | 3210734 | -                | rseC              | Sigma-E factor regulatory protein RseC                 |
| G2583_3153 | CDS  | 3210731 | 3211687 | -                | rseB              | Sigma-E factor regulatory protein rseB precursor       |
| G2583_3154 | CDS  | 3211687 | 3212325 | -                | rseA              | Sigma-E factor negative regulatory protein             |
| G2583_3155 | CDS  | 3212358 | 3212933 | -                | rpoE              | DNA-directed RNA polymerase specialized sigma subunit, |
| G2583_3156 | CDS  | 3213341 | 3214963 | +                | nadB              | L-aspartate oxidase                                    |
| G2583_3157 | CDS  | 3214948 | 3215805 | -                | yfiC              | Putative enzyme                                        |
| G2583_3158 | CDS  | 3215817 | 3217151 | +                | srmB              | ATP-dependent RNA helicase SrmB                        |
| G2583_3159 | CDS  | 3217184 | 3218110 | -                | yfiE              | putative transcriptional regulator LYSR-type           |
| G2583_3160 | CDS  | 3218168 | 3218755 | +                | eamB              | Cysteine/O-acetylserine efflux protein                 |
| G2583_3161 | CDS  | 3218811 | 3219194 | -                | yfiD              | Autonomous glycy radical cofactor                      |
| G2583_3162 | CDS  | 3219499 | 3220188 | +                | ung               | Uracil-DNA glycosylase                                 |
| G2583_3163 | CDS  | 3220236 | 3221273 | -                | yfiF              | rRNA methylases                                        |
| G2583_3164 | CDS  | 3221263 | 3221466 | -                | -                 | hypothetical protein                                   |
| G2583_3165 | CDS  | 3221480 | 3221899 | +                | trxC              | Thioredoxin-2                                          |
| G2583_3166 | CDS  | 3221968 | 3222666 | +                | yfiP              | DTW domain protein                                     |
| G2583_3167 | CDS  | 3222698 | 3225358 | +                | yfiQ              | CoA binding domain/acetyltransferase domain protein    |
| G2583_3168 | CDS  | 3225469 | 3226827 | +                | pssA              | CDP-diacylglycerol--serine O-phosphatidyltransferase   |
| G2583_3169 | CDS  | 3226873 | 3227196 | +                | yfiM              | hypothetical protein                                   |
| G2583_3170 | CDS  | 3227193 | 3228491 | -                | kgtP              | Alpha-ketoglutarate permease                           |
| G2583_3171 | rRNA | 3228814 | 3228929 | -                | rrfG              | 5S ribosomal RNA                                       |
| G2583_3172 | rRNA | 3229024 | 3231926 | -                | rrlG              | 23S ribosomal RNA                                      |
| G2583_3173 | tRNA | 3232109 | 3232186 | -                | -                 | Glu tRNA                                               |
| G2583_3174 | rRNA | 3232271 | 3233812 | -                | rrsG              | 16S ribosomal RNA                                      |

| Locus_tag  | Type       | Start   | End     | +/- <sup>a</sup> | Gene <sup>b</sup> | Product                                                        |
|------------|------------|---------|---------|------------------|-------------------|----------------------------------------------------------------|
| G2583_3175 | CDS        | 3234255 | 3236840 | -                | -                 | Heat shock protein                                             |
| G2583_3176 | CDS        | 3236958 | 3237689 | -                | yfiH              | hypothetical protein                                           |
| G2583_3177 | CDS        | 3237686 | 3238666 | -                | rIuD              | Ribosomal large subunit pseudouridine synthase D               |
| G2583_3178 | CDS        | 3238801 | 3239538 | +                | yfiO              | predicted lipoprotein                                          |
| G2583_3179 | CDS        | 3239568 | 3239774 | +                | -                 | hypothetical protein                                           |
| G2583_3180 | CDS        | 3239809 | 3240150 | +                | raiA              | Ribosome-associated inhibitor A                                |
| G2583_3181 | CDS        | 3240400 | 3241560 | +                | pheA              | P-protein [Includes: Chorismate mutase (CM)]                   |
| G2583_3182 | CDS        | 3241603 | 3242724 | -                | tyrA              | Chorismate mutase/prephenate dehydrogenase                     |
| G2583_3183 | CDS        | 3242735 | 3243805 | -                | aroF              | Phospho-2-dehydro-3-deoxyheptonate aldolase, Tyr-sensitive     |
| G2583_3184 | CDS        | 3243976 | 3244380 | +                | yfiL              | hypothetical protein                                           |
| G2583_3185 | CDS        | 3244530 | 3245048 | +                | yfiR              | hypothetical protein                                           |
| G2583_3186 | CDS        | 3245038 | 3246264 | +                | yfiN              | GGDEF domain protein                                           |
| G2583_3187 | CDS        | 3246280 | 3246762 | +                | yfiB              | OmpA family protein                                            |
| G2583_3188 | CDS        | 3246839 | 3247186 | -                | rplS              | 50S ribosomal protein L19                                      |
| G2583_3189 | CDS        | 3247228 | 3247995 | -                | trmD              | tRNA (guanine-N(1)-)-methyltransferase                         |
| G2583_3190 | CDS        | 3248026 | 3248577 | -                | rimM              | 16S rRNA-processing protein rimM                               |
| G2583_3191 | CDS        | 3248593 | 3248841 | -                | rpsP              | 30S ribosomal subunit protein S16                              |
| G2583_3192 | CDS        | 3248978 | 3250339 | -                | ffh               | Signal recognition particle protein                            |
| G2583_3193 | CDS        | 3250431 | 3251297 | +                | ypjD              | hypothetical protein                                           |
| G2583_3194 | CDS        | 3251343 | 3252605 | +                | yfiJ              | CBS/transporter associated domain protein                      |
| G2583_3195 | CDS        | 3252660 | 3253253 | -                | grpE              | heat shock protein GrpE                                        |
| G2583_3196 | CDS        | 3253376 | 3254254 | +                | nadK              | Probable inorganic polyphosphate/ATP-NAD kinase                |
| G2583_3197 | CDS        | 3254340 | 3256001 | +                | recN              | recombination and repair protein                               |
| G2583_3198 | CDS        | 3256150 | 3256491 | +                | smpA              | Lipoprotein, SmpA/OmlA family                                  |
| G2583_3199 | CDS        | 3256553 | 3256843 | -                | yfiF              | hypothetical protein                                           |
| G2583_3200 | CDS        | 3256833 | 3257309 | -                | yfiG              | Polyketide cyclase/dehydrase family protein                    |
| G2583_3201 | CDS        | 3257441 | 3257923 | +                | smpB              | SsrA-binding protein                                           |
| G2583_3202 | tmRNA      | 3258138 | 3258500 | +                | -                 | tmRNA                                                          |
| G2583_3203 | CDS        | 3258769 | 3259017 | +                | -                 | DinI-like protein Z3916/ECs3483                                |
| G2583_3204 | CDS        | 3259519 | 3260109 | -                | lpgB              | Putative chaperone protein                                     |
| G2583_3205 | CDS        | 3260291 | 3260851 | +                | -                 | PotB, trcA, ORF2, ORF3, ORF4 genes,                            |
| G2583_3206 | pseudogene | 3261015 | 3261725 | +                | -                 | conserved hypothetical protein                                 |
| G2583_3207 | CDS        | 3261654 | 3262226 | -                | -                 | hypothetical protein                                           |
| G2583_3208 | CDS        | 3262608 | 3263921 | -                | -                 | putative tail fiber protein encoded by prophage CP-933R        |
| G2583_3209 | CDS        | 3263986 | 3264609 | -                | -                 | Opacity protein and related surface antigens                   |
| G2583_3210 | CDS        | 3264679 | 3268155 | -                | -                 | Phage-related protein, tail component                          |
| G2583_3211 | CDS        | 3268402 | 3269082 | -                | -                 | putative tail assembly protein                                 |
| G2583_3212 | CDS        | 3268980 | 3269756 | -                | -                 | Cell wall-associated hydrolases (invasion-associated proteins) |
| G2583_3213 | CDS        | 3269772 | 3270776 | -                | ant               | Antirepressor protein                                          |
| G2583_3214 | CDS        | 3270766 | 3270939 | -                | -                 | hypothetical protein                                           |
| G2583_3215 | CDS        | 3271384 | 3272082 | -                | -                 | putative tail fiber component L of prophage CP-933U            |
| G2583_3216 | CDS        | 3272082 | 3272423 | -                | -                 | Putative minor tail protein                                    |
| G2583_3217 | CDS        | 3272416 | 3275658 | -                | -                 | Phage-related minor tail protein                               |
| G2583_3218 | CDS        | 3275706 | 3275987 | -                | -                 | Gp14                                                           |
| G2583_3219 | CDS        | 3276011 | 3276433 | -                | -                 | Putative tail assembly chaperone encoded by prophage CP-       |
| G2583_3220 | CDS        | 3276400 | 3277116 | -                | -                 | Putative tail component of cryptic prophage CP-933P            |
| G2583_3221 | CDS        | 3277183 | 3277527 | -                | -                 | Gp11                                                           |
| G2583_3222 | CDS        | 3277524 | 3277970 | -                | -                 | Phage protein, HK97 gp10 family                                |
| G2583_3223 | CDS        | 3277967 | 3278317 | -                | -                 | Bacteriophage head-tail adaptor                                |
| G2583_3224 | CDS        | 3278328 | 3278654 | -                | -                 | unknown protein encoded by cryptic prophage CP-933M            |
| G2583_3225 | CDS        | 3278651 | 3280036 | -                | -                 | Portal protein (GP3)                                           |
| G2583_3226 | CDS        | 3280033 | 3281397 | -                | -                 | Portal protein (GP3)                                           |
| G2583_3227 | CDS        | 3281343 | 3281564 | -                | -                 | hypothetical protein                                           |
| G2583_3228 | CDS        | 3281609 | 3283546 | -                | -                 | Phage head maturation protease                                 |
| G2583_3229 | CDS        | 3283610 | 3285271 | -                | -                 | Phage terminase-like protein, large subunit                    |
| G2583_3230 | CDS        | 3285268 | 3285831 | -                | -                 | unknown protein encoded by prophage CP-933N                    |
| G2583_3231 | CDS        | 3286122 | 3286487 | -                | -                 | unknown protein encoded by prophage CP-933N                    |
| G2583_3232 | CDS        | 3286529 | 3286729 | +                | -                 | conserved hypothetical protein                                 |
| G2583_3233 | CDS        | 3286862 | 3287203 | -                | tonB              | tonB-like membrane protein encoded within prophage CP-933N     |
| G2583_3234 | CDS        | 3287535 | 3287759 | -                | -                 | conserved hypothetical protein                                 |

| Locus_tag  | Type | Start   | End     | +/- <sup>a</sup> | Gene <sup>b</sup> | Product                                                     |
|------------|------|---------|---------|------------------|-------------------|-------------------------------------------------------------|
| G2583_3235 | CDS  | 3287756 | 3288250 | -                | -                 | Putative endopeptidase Rz                                   |
| G2583_3236 | CDS  | 3288404 | 3288973 | -                | antU              | Antirepressor protein                                       |
| G2583_3237 | CDS  | 3289244 | 3289777 | -                | -                 | putative endolysin                                          |
| G2583_3238 | CDS  | 3289828 | 3290172 | -                | -                 | hypothetical protein                                        |
| G2583_3239 | CDS  | 3290177 | 3290452 | -                | -                 | putative holin protein of prophage CP-933U                  |
| G2583_3240 | CDS  | 3290758 | 3291105 | +                | insN              | unknown protein encoded by IS911 within prophage CP-933L    |
| G2583_3241 | CDS  | 3291318 | 3291971 | +                | -                 | putative transposase                                        |
| G2583_3242 | CDS  | 3292088 | 3293938 | -                | -                 | YjhS                                                        |
| G2583_3243 | CDS  | 3294179 | 3294697 | +                | -                 | hypothetical protein                                        |
| G2583_3244 | CDS  | 3294510 | 3295004 | -                | -                 | unknown protein encoded within prophage CP-933R             |
| G2583_5274 | tRNA | 3295111 | 3295187 | -                | -                 | Arg tRNA                                                    |
| G2583_5275 | tRNA | 3295201 | 3295277 | -                | -                 | Arg tRNA                                                    |
| G2583_5276 | tRNA | 3295287 | 3295362 | -                | -                 | Met tRNA                                                    |
| G2583_3245 | CDS  | 3295403 | 3295555 | -                | -                 | DNA modification methylase                                  |
| G2583_3246 | CDS  | 3295804 | 3296238 | -                | ybcQ              | Antitermination protein Q                                   |
| G2583_3247 | CDS  | 3296231 | 3296425 | -                | ninH              | hypothetical protein                                        |
| G2583_3248 | CDS  | 3296422 | 3297027 | -                | NinG              | NinG protein                                                |
| G2583_3249 | CDS  | 3297027 | 3297755 | -                | roi               | hypothetical protein                                        |
| G2583_3250 | CDS  | 3297824 | 3298528 | -                | ant               | Putative antirepressor                                      |
| G2583_3251 | CDS  | 3298806 | 3298988 | -                | ninE              | NinE protein                                                |
| G2583_3252 | CDS  | 3298985 | 3299512 | -                | -                 | Putative DNA N-6-adenine-methyltransferase of bacteriophage |
| G2583_3253 | CDS  | 3299509 | 3299949 | -                | ninB              | hypothetical protein                                        |
| G2583_3254 | CDS  | 3300023 | 3300313 | -                | -                 | Ren protein                                                 |
| G2583_3255 | CDS  | 3300310 | 3301011 | -                | -                 | P protein                                                   |
| G2583_3256 | CDS  | 3301008 | 3301946 | -                | -                 | phage replication protein O                                 |
| G2583_3257 | CDS  | 3301979 | 3302275 | -                | -                 | CII protein                                                 |
| G2583_3258 | CDS  | 3302385 | 3302570 | -                | cro               | Cro                                                         |
| G2583_3259 | CDS  | 3302651 | 3303301 | +                | ymfK              | P22 repressor protein c2                                    |
| G2583_3260 | CDS  | 3303586 | 3303921 | +                | -                 | hypothetical lipoprotein                                    |
| G2583_3261 | CDS  | 3303918 | 3304262 | +                | -                 | hypothetical protein                                        |
| G2583_3262 | CDS  | 3304396 | 3304866 | +                | -                 | Gp45                                                        |
| G2583_3263 | CDS  | 3305016 | 3305384 | +                | -                 | Lambda prophage-derived protein ea10                        |
| G2583_3264 | CDS  | 3305457 | 3305621 | +                | -                 | Lambda phage regulatory protein CIII                        |
| G2583_3265 | CDS  | 3305590 | 3305754 | +                | kilW              | putative Kil protein of bacteriophage BP-933W               |
| G2583_3266 | CDS  | 3306111 | 3306896 | +                | bet               | Recombination protein Bet                                   |
| G2583_3267 | CDS  | 3306893 | 3307573 | +                | -                 | Putative exonuclease encoded by prophage CP-933K            |
| G2583_3268 | CDS  | 3307564 | 3307752 | +                | -                 | hypothetical protein                                        |
| G2583_3269 | CDS  | 3307725 | 3307916 | +                | -                 | hypothetical protein                                        |
| G2583_3270 | CDS  | 3307927 | 3308208 | +                | -                 | hypothetical protein                                        |
| G2583_3271 | CDS  | 3308307 | 3308528 | +                | -                 | C4-type zinc finger protein                                 |
| G2583_3272 | CDS  | 3308525 | 3309343 | +                | -                 | Enterohemolysin 2                                           |
| G2583_3273 | CDS  | 3309340 | 3309843 | +                | -                 | Valyl-tRNA synthetase                                       |
| G2583_3274 | CDS  | 3309931 | 3310173 | +                | -                 | hypothetical protein                                        |
| G2583_3275 | CDS  | 3310177 | 3310323 | +                | -                 | Putative bacteriophage protein                              |
| G2583_3276 | CDS  | 3310496 | 3311680 | +                | -                 | hypothetical protein                                        |
| G2583_3277 | CDS  | 3312173 | 3313096 | +                | -                 | hypothetical protein                                        |
| G2583_3278 | CDS  | 3313387 | 3314616 | +                | intA              | phage integrase family protein                              |
| G2583_3279 | CDS  | 3315239 | 3316870 | -                | -                 | hypothetical protein                                        |
| G2583_3280 | CDS  | 3316939 | 3317553 | -                | -                 | hypothetical protein                                        |
| G2583_3281 | CDS  | 3317550 | 3318521 | -                | -                 | hypothetical protein                                        |
| G2583_3282 | CDS  | 3318496 | 3318663 | -                | -                 | hypothetical protein                                        |
| G2583_3283 | CDS  | 3318656 | 3320044 | -                | -                 | hypothetical protein                                        |
| G2583_3284 | CDS  | 3320630 | 3320818 | +                | intA              | Prophage integrase                                          |
| G2583_3285 | CDS  | 3321014 | 3322207 | +                | -                 | conserved hypothetical protein                              |
| G2583_3286 | CDS  | 3322846 | 3325167 | +                | -                 | Hypothetical purine NTPase                                  |
| G2583_3287 | CDS  | 3326354 | 3326755 | +                | -                 | hypothetical protein                                        |
| G2583_3288 | CDS  | 3326760 | 3327992 | +                | -                 | hypothetical protein                                        |
| G2583_3289 | CDS  | 3328303 | 3329004 | +                | -                 | hypothetical protein                                        |
| G2583_3290 | CDS  | 3329001 | 3329375 | +                | -                 | hypothetical protein                                        |
| G2583_3291 | CDS  | 3329451 | 3330695 | -                | -                 | hypothetical protein                                        |

| Locus_tag  | Type       | Start   | End     | +/- <sup>a</sup> | Gene <sup>b</sup> | Product                                                        |
|------------|------------|---------|---------|------------------|-------------------|----------------------------------------------------------------|
| G2583_3292 | CDS        | 3331091 | 3331561 | -                | -                 | hypothetical protein                                           |
| G2583_3293 | CDS        | 3331602 | 3332000 | -                | -                 | hypothetical protein                                           |
| G2583_3294 | CDS        | 3332001 | 3333632 | -                | -                 | Conserved DNA-binding protein                                  |
| G2583_3295 | CDS        | 3333629 | 3334954 | -                | -                 | Site-specific recombinase, phage integrase family protein      |
| G2583_3296 | CDS        | 3334944 | 3336149 | -                | -                 | Putative site specific recombinase                             |
| G2583_3297 | CDS        | 3336472 | 3336720 | -                | alpA              | Putative DNA binding protein                                   |
| G2583_3298 | CDS        | 3336778 | 3337629 | -                | -                 | hypothetical protein                                           |
| G2583_3299 | pseudogene | 3338057 | 3342654 | -                | ypjA              | Outer membrane autotransporter barrel domain protein           |
| G2583_3300 | CDS        | 3342993 | 3343136 | -                | -                 | Putative DNA-invertase from prophage CP4-44                    |
| G2583_3301 | CDS        | 3343590 | 3344939 | -                | ypjB              | hypothetical protein                                           |
| G2583_3302 | CDS        | 3345447 | 3345599 | -                | -                 | hypothetical protein                                           |
| G2583_3303 | tRNA       | 3345691 | 3345766 | -                | -                 | Met tRNA                                                       |
| G2583_3304 | CDS        | 3346327 | 3348579 | +                | ygaR              | hypothetical protein                                           |
| G2583_3305 | CDS        | 3348916 | 3349893 | +                | csiD              | alpha amylase family protein                                   |
| G2583_3306 | CDS        | 3349847 | 3351181 | +                | ygaF              | hypothetical protein                                           |
| G2583_3307 | CDS        | 3351204 | 3352652 | +                | gabD              | Succinate-semialdehyde dehydrogenase (NAD(P)(+))               |
| G2583_3308 | CDS        | 3352666 | 3353946 | +                | gabT              | 4-aminobutyrate transaminase                                   |
| G2583_3309 | CDS        | 3354184 | 3355584 | +                | gabP              | GABA permease                                                  |
| G2583_3310 | CDS        | 3355605 | 3356267 | +                | csiR              | DNA-binding transcriptional regulator CsiR                     |
| G2583_3311 | CDS        | 3356268 | 3356717 | -                | ygaU              | Phospholipid-binding protein                                   |
| G2583_3312 | CDS        | 3356801 | 3356959 | -                | yqaE              | UPF0057 membrane protein yqaE                                  |
| G2583_3313 | CDS        | 3357142 | 3357441 | +                | ygaV              | hypothetical protein                                           |
| G2583_3314 | CDS        | 3357451 | 3357969 | +                | ygaP              | hypothetical protein                                           |
| G2583_3315 | CDS        | 3358022 | 3358426 | -                | stpA              | DNA-binding protein H-NS                                       |
| G2583_3316 | CDS        | 3359094 | 3359543 | +                | ygaW              | hypothetical protein                                           |
| G2583_3317 | CDS        | 3359580 | 3359924 | -                | ygaC              | hypothetical protein                                           |
| G2583_3318 | CDS        | 3360064 | 3360405 | +                | ygaM              | hypothetical protein                                           |
| G2583_3319 | CDS        | 3360555 | 3361889 | -                | -                 | transcriptional regulator, GntR family                         |
| G2583_3320 | CDS        | 3361977 | 3362408 | +                | -                 | Carboxymuconolactone decarboxylase family protein              |
| G2583_3321 | CDS        | 3362617 | 3362862 | +                | nrdH              | Glutaredoxin-like protein nrdH                                 |
| G2583_3322 | CDS        | 3362859 | 3363269 | +                | nrdI              | ribonucleotide reductase stimulatory protein                   |
| G2583_3323 | CDS        | 3363242 | 3365386 | +                | nrdE              | Ribonucleoside-diphosphate reductase, alpha subunit            |
| G2583_3324 | CDS        | 3365396 | 3366355 | +                | nrdF              | Ribonucleoside-diphosphate reductase 2 subunit beta            |
| G2583_3325 | CDS        | 3366711 | 3367913 | +                | proV              | ATP-binding component of transport system                      |
| G2583_3326 | CDS        | 3367906 | 3368970 | +                | proW              | Glycine betaine/L-proline ABC transporter, permease protein    |
| G2583_3327 | CDS        | 3369027 | 3370019 | +                | proX              | Glycine betaine-binding periplasmic protein precursor          |
| G2583_3328 | CDS        | 3370211 | 3371395 | +                | ygaX              | Putative transport protein                                     |
| G2583_3329 | CDS        | 3371519 | 3372256 | +                | ygaZ              | Transporter, branched chain amino acid exporter (LIV-E) family |
| G2583_3330 | CDS        | 3372246 | 3372581 | +                | ygaH              | predicted inner membrane protein                               |
| G2583_3331 | CDS        | 3372672 | 3373202 | +                | mprA              | transcriptional repressor MprA                                 |
| G2583_3332 | CDS        | 3373329 | 3374501 | +                | emrA              | Multidrug resistance protein A                                 |
| G2583_3333 | CDS        | 3374518 | 3376056 | +                | emrB              | Probably membrane translocase                                  |
| G2583_3334 | CDS        | 3376120 | 3376635 | -                | luxS              | S-ribosylhomocysteine lyase                                    |
| G2583_3335 | ncRNA      | 3376703 | 3376777 | +                | sraD              | ncRNA                                                          |
| G2583_3336 | CDS        | 3376785 | 3378341 | -                | gshA              | Glutamate--cysteine ligase                                     |
| G2583_3337 | CDS        | 3378414 | 3378842 | -                | yqaA              | hypothetical protein                                           |
| G2583_3338 | CDS        | 3378839 | 3379405 | -                | yqaB              | HAD-superfamily hydrolase, subfamily IA                        |
| G2583_3339 | tRNA       | 3379685 | 3379763 | -                | -                 | Arg tRNA                                                       |
| G2583_3340 | tRNA       | 3379864 | 3379942 | -                | -                 | Arg tRNA                                                       |
| G2583_3341 | tRNA       | 3380003 | 3380081 | -                | -                 | Arg tRNA                                                       |
| G2583_3342 | tRNA       | 3380144 | 3380222 | -                | -                 | Arg tRNA                                                       |
| G2583_3343 | tRNA       | 3380224 | 3380318 | -                | -                 | Ser tRNA                                                       |
| G2583_3344 | CDS        | 3380633 | 3380818 | -                | csrA              | Carbon storage regulator-like protein                          |
| G2583_3345 | CDS        | 3381053 | 3383683 | -                | alaS              | Alanyl-tRNA synthetase                                         |
| G2583_3346 | CDS        | 3383811 | 3384311 | -                | recX              | regulatory protein RecX                                        |
| G2583_3347 | CDS        | 3384379 | 3385440 | -                | recA              | RecA/GFP fusion protein                                        |
| G2583_3348 | CDS        | 3385520 | 3386017 | -                | ygaD              | Competence/damage-inducible protein CinA domain protein        |
| G2583_3349 | CDS        | 3386162 | 3387247 | -                | mltB              | Membrane-bound lytic murein transglycosylase B                 |
| G2583_3350 | CDS        | 3387502 | 3388065 | +                | srlA              | Glucitol/sorbitol permease IIC component                       |
| G2583_3351 | CDS        | 3388062 | 3389021 | +                | srlE              | Phosphotransferase system sorbitol-specific component IIBC     |



| Locus_tag  | Type  | Start   | End     | +/- <sup>a</sup> | Gene <sup>b</sup> | Product                                                       |
|------------|-------|---------|---------|------------------|-------------------|---------------------------------------------------------------|
| G2583_3352 | CDS   | 3389032 | 3389403 | +                | srlB              | sorbitol-6-phosphate dehydrogenase                            |
| G2583_3353 | CDS   | 3389407 | 3390186 | +                | srlD              | Sorbitol-6-phosphate 2-dehydrogenase                          |
| G2583_3354 | CDS   | 3390292 | 3390651 | +                | gutM              | Glucitol operon activator protein                             |
| G2583_3355 | CDS   | 3390718 | 3391491 | +                | srlR              | Glucitol operon repressor                                     |
| G2583_3356 | CDS   | 3391484 | 3392449 | +                | gutQ              | D-arabinose 5-phosphate isomerase                             |
| G2583_3357 | CDS   | 3392446 | 3393960 | -                | norR              | Anaerobic nitric oxide reductase transcription regulator norR |
| G2583_3358 | CDS   | 3394147 | 3395586 | +                | norV              | Uncharacterized flavoproteins                                 |
| G2583_3359 | CDS   | 3395583 | 3396716 | +                | norW              | Nitric oxide reductase FIRd-NAD(+) reductase                  |
| G2583_3360 | CDS   | 3396844 | 3399144 | -                | hypF              | Carbamoyltransferase HypF                                     |
| G2583_3361 | CDS   | 3399249 | 3399776 | -                | hydN              | Electron transport protein hydN                               |
| G2583_3362 | CDS   | 3399925 | 3400977 | -                | ascG              | transcriptional regulator AscG                                |
| G2583_3363 | CDS   | 3401195 | 3402652 | +                | ascF              | PTS system enzyme II ABC (Asc), cryptic, transports specific  |
| G2583_3364 | CDS   | 3402661 | 3404085 | +                | ascB              | 6-phospho-beta-glucosidase                                    |
| G2583_3365 | CDS   | 3404209 | 3404679 | -                | hycl              | Hydrogenase 3 maturation protease                             |
| G2583_3366 | CDS   | 3404672 | 3405082 | -                | hycH              | Formate hydrogenlyase maturation protein hycH                 |
| G2583_3367 | CDS   | 3405079 | 3405846 | -                | hycG              | Formate hydrogenlyase, subunit G                              |
| G2583_3368 | CDS   | 3405846 | 3406388 | -                | hycF              | Formate hydrogenlyase, subunit F                              |
| G2583_3369 | CDS   | 3406398 | 3408128 | -                | hycE              | Formate hydrogenlyase, subunit E                              |
| G2583_3370 | CDS   | 3408125 | 3409048 | -                | hycD              | Membrane-spanning protein of hydrogenase 3                    |
| G2583_3371 | CDS   | 3409051 | 3410877 | -                | hycC              | Formate hydrogenlyase, subunit C                              |
| G2583_3372 | CDS   | 3410874 | 3411485 | -                | hycB              | Formate hydrogenlyase, subunit B                              |
| G2583_3373 | CDS   | 3411610 | 3412071 | -                | hycA              | Formate hydrogenlyase regulatory protein hycA                 |
| G2583_3374 | CDS   | 3412105 | 3412242 | -                | -                 | hypothetical protein                                          |
| G2583_3375 | CDS   | 3412271 | 3412633 | +                | hypA              | Hydrogenase nickel insertion protein HypA                     |
| G2583_3376 | CDS   | 3412637 | 3413509 | +                | hypB              | Hydrogenase isoenzymes nickel incorporation protein hypB      |
| G2583_3377 | CDS   | 3413500 | 3413772 | +                | hypC              | Hydrogenase isoenzymes formation protein hypC                 |
| G2583_3378 | CDS   | 3413772 | 3414893 | +                | hypD              | Hydrogenase expression/formation protein HypD                 |
| G2583_3379 | CDS   | 3414890 | 3415900 | +                | hypE              | Hydrogenase maturation factor                                 |
| G2583_3380 | CDS   | 3415974 | 3418052 | +                | fhlA              | Formate hydrogenlyase transcriptional activator               |
| G2583_3381 | CDS   | 3418089 | 3418442 | -                | ygbA              | hypothetical protein                                          |
| G2583_3382 | CDS   | 3418519 | 3418653 | -                | -                 | hypothetical protein                                          |
| G2583_3383 | CDS   | 3418729 | 3421290 | +                | mutS              | DNA mismatch repair protein mutS                              |
| G2583_3384 | CDS   | 3421396 | 3422052 | +                | pphB              | O218 protein                                                  |
| G2583_3385 | CDS   | 3422093 | 3422329 | -                | kpdD              | 4-hydroxybenzoate decarboxylase, subunit D                    |
| G2583_3386 | CDS   | 3422340 | 3423767 | -                | kpdC              | YclC protein                                                  |
| G2583_3387 | CDS   | 3423767 | 3424360 | -                | padI              | Probable aromatic acid decarboxylase                          |
| G2583_3388 | CDS   | 3424474 | 3424914 | +                | -                 | putative regulator                                            |
| G2583_3389 | CDS   | 3425034 | 3426026 | -                | rpoS              | RNA polymerase sigma factor                                   |
| G2583_3390 | CDS   | 3426089 | 3427228 | -                | nlpD              | Lipoprotein                                                   |
| G2583_3391 | CDS   | 3427368 | 3427994 | -                | pcm               | Protein-L-isoaspartate O-methyltransferase                    |
| G2583_3392 | CDS   | 3427988 | 3428749 | -                | surE              | Multifunctional protein surE [Includes: 5'/3'-nucleotidase    |
| G2583_3393 | CDS   | 3428730 | 3429779 | -                | truD              | tRNA pseudouridine synthase D                                 |
| G2583_3394 | CDS   | 3429776 | 3430255 | -                | ispF              | 2-C-methyl-D-erythritol 2,4-cyclodiphosphate synthase         |
| G2583_3395 | CDS   | 3430255 | 3430965 | -                | ispD              | 2-C-methyl-D-erythritol 4-phosphate cytidyltransferase        |
| G2583_3396 | CDS   | 3430984 | 3431295 | -                | ftsB              | Cell division protein ftsB-like protein                       |
| G2583_3397 | CDS   | 3431489 | 3431812 | -                | ygbE              | hypothetical protein                                          |
| G2583_3398 | CDS   | 3431862 | 3432467 | -                | cysC              | Adenylyl-sulfate kinase                                       |
| G2583_3399 | CDS   | 3432467 | 3433894 | -                | cysN              | Sulfate adenylyltransferase subunit 1                         |
| G2583_3400 | CDS   | 3433896 | 3434804 | -                | cysD              | Sulfate adenylyltransferase subunit 2                         |
| G2583_3401 | CDS   | 3435056 | 3436093 | +                | iap               | Alkaline phosphatase isozyme conversion peptidase             |
| G2583_3402 | CDS   | 3436483 | 3436776 | -                | ygbF              | CRISPR-associated protein Cas2                                |
| G2583_3403 | CDS   | 3436773 | 3437696 | -                | ygbT              | CRISPR-associated protein Cas1                                |
| G2583_3404 | CDS   | 3437693 | 3438343 | -                | cse               | CRISPR-associated protein, Cse3 family                        |
| G2583_3405 | CDS   | 3438325 | 3439071 | -                | ygcl              | CRISPR-associated protein Cas5                                |
| G2583_3406 | CDS   | 3439082 | 3440137 | -                | ygjJ              | CRISPR-associated protein, Cse4 family                        |
| G2583_3407 | CDS   | 3440149 | 3440685 | -                | cse               | CRISPR-associated protein, Cse2 family                        |
| G2583_3408 | CDS   | 3440682 | 3442244 | -                | ygcl              | CRISPR-associated protein, Cse1 family                        |
| G2583_3409 | CDS   | 3442342 | 3445041 | -                | ygjB              | CRISPR-associated helicase Cas3                               |
| G2583_3410 | CDS   | 3445233 | 3445520 | -                | small             | Small toxic membrane polypeptide                              |
| G2583_3411 | ncRNA | 3445569 | 3445643 | -                | -                 | ncRNA                                                         |

| Locus_tag  | Type       | Start   | End     | +/- <sup>a</sup> | Gene <sup>b</sup> | Product                                                     |
|------------|------------|---------|---------|------------------|-------------------|-------------------------------------------------------------|
| G2583_3412 | CDS        | 3445649 | 3446383 | -                | cysH              | Phosphoadenosine phosphosulfate reductase                   |
| G2583_3413 | CDS        | 3446457 | 3448169 | -                | cysl              | Sulfite reductase [NADPH] hemoprotein beta-component        |
| G2583_3414 | CDS        | 3448169 | 3449968 | -                | cysJ              | Sulfite reductase [NADPH] flavoprotein alpha-component      |
| G2583_3415 | CDS        | 3450200 | 3450649 | +                | sscR              | Putative 6-pyruvoyl tetrahydrobiopterin synthase            |
| G2583_3416 | CDS        | 3450697 | 3451998 | +                | ygcN              | hypothetical protein                                        |
| G2583_3417 | CDS        | 3451953 | 3452249 | +                | ygcO              | hypothetical protein                                        |
| G2583_3418 | CDS        | 3452266 | 3452841 | +                | ygcP              | Glycerol-3-phosphate responsive antiterminator              |
| G2583_3419 | pseudogene | 3452989 | 3453849 | -                | ygcQ              | Electron transfer flavoprotein                              |
| G2583_3420 | CDS        | 3453846 | 3454631 | -                | ygcR              | Electron transfer flavoprotein                              |
| G2583_3421 | CDS        | 3454603 | 3456012 | -                | ygcS              | Permease (major facilitator superfamily)                    |
| G2583_3422 | CDS        | 3456034 | 3457488 | -                | ygcU              | Uncharacterized flavoprotein ygcU                           |
| G2583_3423 | CDS        | 3457558 | 3458418 | -                | ygcW              | Hypothetical oxidoreductase ygcW                            |
| G2583_3424 | CDS        | 3458662 | 3459792 | +                | yqcE              | putative transport protein                                  |
| G2583_3425 | CDS        | 3459966 | 3461444 | +                | ygcE              | Carbohydrate kinase, FGGY family protein                    |
| G2583_3426 | CDS        | 3462632 | 3463303 | -                | ygcF              | hypothetical protein                                        |
| G2583_3427 | CDS        | 3463584 | 3464078 | +                | LemA              | LemA family protein                                         |
| G2583_3428 | CDS        | 3464092 | 3464985 | +                | -                 | hypothetical protein                                        |
| G2583_3429 | CDS        | 3465000 | 3466148 | +                | -                 | hypothetical protein                                        |
| G2583_3430 | CDS        | 3466154 | 3467059 | +                | ygcG              | hypothetical protein                                        |
| G2583_3431 | CDS        | 3467119 | 3468417 | -                | eno               | Enolase                                                     |
| G2583_3432 | CDS        | 3468505 | 3470142 | -                | pyrG              | CTP synthase                                                |
| G2583_3433 | CDS        | 3470370 | 3471161 | -                | mazG              | Nucleoside triphosphate pyrophosphohydrolase                |
| G2583_3434 | CDS        | 3471232 | 3471567 | -                | chpA              | PemK-like protein 1                                         |
| G2583_3435 | CDS        | 3471567 | 3471815 | -                | chpR              | PemI-like protein 1                                         |
| G2583_3436 | CDS        | 3471893 | 3474127 | -                | relA              | GTP diphosphokinase                                         |
| G2583_3437 | CDS        | 3474175 | 3475476 | -                | rumA              | 23S rRNA (uracil-5-)-methyltransferase rumA (23S rRNA(M- 5- |
| G2583_3438 | CDS        | 3475533 | 3478289 | +                | barA              | Signal transduction histidine-protein kinase barA           |
| G2583_3439 | CDS        | 3478522 | 3479862 | -                | gudD              | Glucarate dehydratase                                       |
| G2583_3440 | CDS        | 3479883 | 3481223 | -                | gudX              | Glucarate dehydratase                                       |
| G2583_3441 | CDS        | 3481225 | 3482577 | -                | gudP              | Glucarate permease                                          |
| G2583_3442 | CDS        | 3483012 | 3483461 | -                | yqcA              | flavodoxin                                                  |
| G2583_3443 | CDS        | 3483479 | 3484261 | -                | truC              | tRNA pseudouridine synthase C                               |
| G2583_3444 | CDS        | 3484261 | 3484590 | -                | yqcC              | hypothetical protein                                        |
| G2583_3445 | ncRNA      | 3484633 | 3484992 | -                | csrB              | ncRNA                                                       |
| G2583_3446 | CDS        | 3485212 | 3485757 | -                | syd               | SecY interacting protein Syd                                |
| G2583_3447 | CDS        | 3485825 | 3486673 | +                | queF              | NADPH-dependent 7-cyano-7-deazaguanine reductase (7-        |
| G2583_3448 | CDS        | 3486785 | 3488149 | +                | ygdH              | hypothetical protein                                        |
| G2583_3449 | CDS        | 3488706 | 3489995 | +                | sdaC              | Serine transporter family protein                           |
| G2583_3450 | CDS        | 3490053 | 3491420 | +                | sdaB              | L-serine ammonia-lyase 2                                    |
| G2583_3451 | CDS        | 3491442 | 3492287 | +                | xni               | Uncharacterized exonuclease xni                             |
| G2583_3452 | CDS        | 3492342 | 3493493 | -                | fucO              | Lactaldehyde reductase                                      |
| G2583_3453 | CDS        | 3493518 | 3494165 | -                | fucA              | L-fuculose phosphate aldolase                               |
| G2583_3454 | CDS        | 3494712 | 3496028 | +                | fucP              | L-fucose:H <sup>+</sup> symporter permease                  |
| G2583_3455 | CDS        | 3496061 | 3497836 | +                | fucl              | L-fucose isomerase                                          |
| G2583_3456 | CDS        | 3497915 | 3499363 | +                | fucK              | L-fuculokinase                                              |
| G2583_3457 | CDS        | 3499365 | 3499787 | +                | fucU              | Fucose operon fucU protein                                  |
| G2583_3458 | CDS        | 3499845 | 3500576 | +                | fucR              | L-fucose operon activator                                   |
| G2583_3459 | CDS        | 3500620 | 3501618 | -                | ygdE              | Putative RNA 2'-O-ribose methyltransferase ygdE             |
| G2583_3460 | CDS        | 3501712 | 3502107 | -                | ygdD              | UPF0382 inner membrane protein ygdD                         |
| G2583_3461 | CDS        | 3502126 | 3503043 | -                | gcvA              | Glycine cleavage system transcriptional activator           |
| G2583_3462 | ncRNA      | 3503172 | 3503318 | +                | gcvB              | ncRNA                                                       |
| G2583_3463 | CDS        | 3503394 | 3503624 | -                | ygdI              | hypothetical protein                                        |
| G2583_3464 | CDS        | 3503813 | 3505018 | +                | csdA              | Cysteine desulfurase, catalytic subunit CsdA                |
| G2583_3465 | CDS        | 3505018 | 3505461 | +                | csdE              | Uncharacterized sufE-like protein ygdK                      |
| G2583_3466 | CDS        | 3505512 | 3506318 | -                | ygdL              | Putative enzyme                                             |
| G2583_3467 | CDS        | 3506557 | 3507855 | -                | mitA              | Membrane-bound lytic murein transglycosylase A              |
| G2583_3468 | tRNA       | 3507863 | 3507939 | +                | -                 | Met tRNA                                                    |
| G2583_3469 | tRNA       | 3507973 | 3508049 | +                | -                 | Met tRNA                                                    |
| G2583_3470 | tRNA       | 3508083 | 3508159 | +                | -                 | Met tRNA                                                    |
| G2583_3471 | CDS        | 3508233 | 3509576 | -                | amiC              | Putative amidase                                            |

| Locus_tag  | Type       | Start   | End     | +/- <sup>a</sup> | Gene <sup>b</sup> | Product                                                   |
|------------|------------|---------|---------|------------------|-------------------|-----------------------------------------------------------|
| G2583_3472 | CDS        | 3509718 | 3511049 | +                | argA              | Amino-acid acetyltransferase                              |
| G2583_3473 | CDS        | 3511111 | 3512937 | -                | recD              | Exodeoxyribonuclease V, alpha subunit                     |
| G2583_3474 | CDS        | 3512937 | 3516479 | -                | recB              | Exodeoxyribonuclease V, beta subunit                      |
| G2583_3475 | CDS        | 3516472 | 3519360 | -                | ptrA              | Protease III                                              |
| G2583_3476 | CDS        | 3519536 | 3522904 | -                | recC              | Exodeoxyribonuclease V, gamma subunit                     |
| G2583_3477 | CDS        | 3522917 | 3523240 | -                | ppdC              | Prepilin peptidase-dependent protein C                    |
| G2583_3478 | CDS        | 3523225 | 3523632 | -                | ygdB              | hypothetical protein                                      |
| G2583_3479 | CDS        | 3523629 | 3524192 | -                | ppdB              | Prepilin peptidase dependent protein B                    |
| G2583_3480 | CDS        | 3524183 | 3524653 | -                | ppdA              | Prepilin peptidase-dependent protein A                    |
| G2583_3481 | CDS        | 3524837 | 3525631 | -                | thyA              | Thymidylate synthase                                      |
| G2583_3482 | CDS        | 3525638 | 3526513 | -                | lgt               | Prolipoprotein diacylglyceryl transferase                 |
| G2583_3483 | CDS        | 3526664 | 3528910 | -                | ptsP              | Phosphoenolpyruvate-protein phosphotransferase            |
| G2583_3484 | CDS        | 3528923 | 3529453 | -                | nudH              | RNA pyrophosphohydrolase ((Di)nucleoside polyphosphate    |
| G2583_3485 | CDS        | 3529806 | 3529952 | -                | ygdT              | hypothetical protein                                      |
| G2583_3486 | CDS        | 3530138 | 3530827 | +                | mutH              | DNA mismatch repair protein mutH                          |
| G2583_3487 | CDS        | 3530896 | 3531609 | +                | ygdQ              | UPF0053 inner membrane protein ygdQ                       |
| G2583_3488 | CDS        | 3531747 | 3531965 | +                | ygdR              | Uncharacterized lipoprotein ygdR precursor                |
| G2583_3489 | CDS        | 3532073 | 3533113 | +                | tas               | predicted oxidoreductase, NADP(H)-dependent aldo-keto     |
| G2583_3490 | CDS        | 3533145 | 3534338 | -                | lplT              | hypothetical protein                                      |
| G2583_3491 | CDS        | 3534331 | 3536490 | -                | aas               | 2-acyl-glycerophospho-ethanolamine acyltransferase        |
| G2583_3492 | ncRNA      | 3536578 | 3536665 | -                | -                 | ncRNA                                                     |
| G2583_3493 | ncRNA      | 3536781 | 3536862 | -                | -                 | ncRNA                                                     |
| G2583_3494 | CDS        | 3537076 | 3538107 | +                | galR              | DNA-binding transcriptional repressor                     |
| G2583_3495 | CDS        | 3538114 | 3539376 | -                | lysA              | Diaminopimelate decarboxylase                             |
| G2583_3496 | CDS        | 3539498 | 3540433 | +                | lysR              | DNA-binding transcriptional regulator LysR                |
| G2583_3497 | CDS        | 3540420 | 3541112 | -                | ygeA              | Putative resistance proteins                              |
| G2583_3498 | CDS        | 3541241 | 3542659 | -                | araE              | Arabinose-proton symporter                                |
| G2583_3499 | CDS        | 3542974 | 3543735 | -                | kduD              | 2-deoxy-D-gluconate 3-dehydrogenase                       |
| G2583_3500 | CDS        | 3543765 | 3544601 | -                | kdul              | 4-deoxy-L-threo-5-hexosulose-uronate ketol-isomerase      |
| G2583_3501 | CDS        | 3544888 | 3546069 | -                | yqeF              | Acetyl-CoA acetyltransferase                              |
| G2583_3502 | CDS        | 3546324 | 3547553 | +                | yqeG              | putative transporter protein                              |
| G2583_3503 | CDS        | 3547953 | 3548645 | +                | yqeH              | hypothetical protein                                      |
| G2583_3504 | CDS        | 3548979 | 3549788 | +                | yqeI              | putative sensory transducer                               |
| G2583_3505 | CDS        | 3549781 | 3550263 | +                | yqeJ              | hypothetical protein                                      |
| G2583_3506 | CDS        | 3550412 | 3550849 | -                | yqeK              | hypothetical protein                                      |
| G2583_3507 | CDS        | 3550977 | 3551213 | -                | -                 | hypothetical protein                                      |
| G2583_3508 | CDS        | 3551267 | 3551758 | +                | ygeF              | hypothetical protein                                      |
| G2583_3509 | CDS        | 3551984 | 3552475 | +                | ygeG              | Tetratricopeptide repeat protein                          |
| G2583_3510 | pseudogene | 3552809 | 3553099 | +                | ygeH              | transcriptional regulatory protein                        |
| G2583_3511 | CDS        | 3553066 | 3553233 | -                | -                 | flagellum-specific ATP synthase                           |
| G2583_3512 | CDS        | 3553238 | 3555298 | -                | EivA              | Type III secretion apparatus protein                      |
| G2583_3513 | CDS        | 3555305 | 3556429 | -                | EivE              | Putative secreted protein                                 |
| G2583_3514 | CDS        | 3556434 | 3558137 | -                | EivG              | Putative type III secretion apparatus protein             |
| G2583_3515 | CDS        | 3558134 | 3558883 | -                | invF              | Putative type III secretion apparatus regulatory protein  |
| G2583_3516 | CDS        | 3559229 | 3559408 | -                | -                 | hypothetical protein                                      |
| G2583_3517 | pseudogene | 3559475 | 3561096 | -                | -                 | hypothetical protein                                      |
| G2583_3518 | tRNA       | 3561317 | 3561392 | -                | -                 | Gly tRNA                                                  |
| G2583_3519 | CDS        | 3561470 | 3562225 | -                | ygeR              | Hypothetical lipoprotein YgeR                             |
| G2583_3520 | CDS        | 3562641 | 3564938 | +                | xdhA              | Xanthine dehydrogenase                                    |
| G2583_3521 | CDS        | 3564949 | 3565827 | +                | xdhB              | Xanthine dehydrogenase FAD-binding subunit                |
| G2583_3522 | CDS        | 3565824 | 3566303 | +                | xdhC              | Xanthine dehydrogenase iron-sulfur-binding subunit        |
| G2583_3523 | CDS        | 3566343 | 3568121 | -                | ygeV              | Putative transcriptional regulator                        |
| G2583_3524 | CDS        | 3568597 | 3569787 | +                | ygeW              | hypothetical protein                                      |
| G2583_3525 | CDS        | 3569845 | 3571041 | +                | ygeX              | Putative diaminopropionate ammonia-lyase                  |
| G2583_3526 | CDS        | 3571099 | 3572310 | +                | ygeY              | peptidase                                                 |
| G2583_3527 | CDS        | 3572351 | 3573748 | +                | hyuA              | D-phenylhydantoinase                                      |
| G2583_3528 | CDS        | 3573796 | 3574728 | +                | yqeA              | Carbamate kinase arcC-like protein                        |
| G2583_3529 | CDS        | 3574769 | 3576394 | -                | yqeB              | Putative xanthine dehydrogenase accessory factor          |
| G2583_3530 | CDS        | 3576442 | 3577212 | -                | yqeC              | Probable selenium-dependent hydroxylase accessory protein |
| G2583_3531 | CDS        | 3577315 | 3577893 | +                | ygfJ              | Molybdenum hydroxylase accessory protein, YgfJ family     |

| Locus_tag  | Type       | Start   | End     | +/- <sup>a</sup> | Gene <sup>b</sup> | Product                                                     |
|------------|------------|---------|---------|------------------|-------------------|-------------------------------------------------------------|
| G2583_3532 | CDS        | 3578215 | 3581313 | +                | ygfK              | putative oxidoreductase, Fe-S subunit                       |
| G2583_3533 | CDS        | 3581316 | 3582644 | +                | ssnA              | Cytosine deaminase and related metal-dependent hydrolases   |
| G2583_3534 | CDS        | 3582694 | 3583473 | +                | ygfM              | hypothetical protein                                        |
| G2583_3535 | CDS        | 3583470 | 3586340 | +                | xdhD              | Probable hypoxanthine oxidase xdhD                          |
| G2583_3536 | CDS        | 3586448 | 3587905 | +                | ygfO              | Putative purine permease ygfO                               |
| G2583_3537 | CDS        | 3587920 | 3589239 | +                | guaD              | guanine deaminase                                           |
| G2583_3538 | CDS        | 3589275 | 3590642 | +                | ygfQ              | hypothetical protein                                        |
| G2583_3539 | CDS        | 3590678 | 3591166 | -                | ygfS              | Putative electron transport protein ygfS                    |
| G2583_3540 | CDS        | 3591166 | 3593100 | -                | ygfT              | putative oxidoreductase Fe-S binding subunit                |
| G2583_3541 | CDS        | 3593452 | 3594969 | +                | ygfU              | Putative xanthine permease                                  |
| G2583_3542 | CDS        | 3595219 | 3595767 | +                | idi               | Isopentenyl-diphosphate Delta-isomerase                     |
| G2583_3543 | CDS        | 3595810 | 3597327 | -                | lysS              | Lysyl-tRNA synthetase                                       |
| G2583_3544 | pseudogene | 3597337 | 3598218 | -                | prfB              | Peptide chain release factor 2                              |
| G2583_3545 | CDS        | 3598526 | 3600259 | -                | recJ              | Single-stranded-DNA-specific exonuclease RecJ               |
| G2583_3546 | CDS        | 3600265 | 3600975 | -                | dsbC              | Thiol:disulfide interchange protein dsbC precursor          |
| G2583_3547 | CDS        | 3601000 | 3601896 | -                | xerD              | Tyrosine recombinase xerD                                   |
| G2583_3548 | CDS        | 3602008 | 3602529 | +                | fldB              | Flavodoxin-2                                                |
| G2583_3549 | CDS        | 3602569 | 3602976 | -                | ygfX              | hypothetical protein                                        |
| G2583_3550 | CDS        | 3602957 | 3603223 | -                | ygfY              | UPF0350 protein ygfY                                        |
| G2583_3551 | CDS        | 3603466 | 3604446 | +                | ygfZ              | tRNA-modifying protein ygfZ                                 |
| G2583_3552 | CDS        | 3604523 | 3605182 | -                | yqfA              | UPF0073 inner membrane protein yqfA                         |
| G2583_3553 | CDS        | 3605346 | 3605657 | -                | yqfB              | Uncharacterized protein conserved in bacteria               |
| G2583_3554 | CDS        | 3605696 | 3607135 | +                | bglA              | 6-phospho-beta-glucosidase BglA                             |
| G2583_3555 | CDS        | 3607301 | 3610174 | -                | gcvP              | Glycine dehydrogenase [decarboxylating]                     |
| G2583_3556 | CDS        | 3610292 | 3610681 | -                | gcvH              | Glycine cleavage system H protein                           |
| G2583_3557 | CDS        | 3610705 | 3611799 | -                | gcvT              | Glycine cleavage complex protein T, aminomethyltransferase, |
| G2583_3558 | CDS        | 3612247 | 3613449 | -                | visC              | Ubiquinone biosynthesis hydroxylase, UbiH/UbiF/VisC/COQ6    |
| G2583_3559 | CDS        | 3613473 | 3614651 | -                | ubiH              | 2-octaprenyl-6-methoxyphenol 4-monooxygenase                |
| G2583_3560 | CDS        | 3614648 | 3615973 | -                | pepP              | Xaa-Pro aminopeptidase                                      |
| G2583_3561 | CDS        | 3615999 | 3616577 | -                | ygfB              | UPF0149 protein ygfB                                        |
| G2583_3562 | CDS        | 3616745 | 3617074 | +                | zapA              | Z-ring-associated protein                                   |
| G2583_3563 | ncRNA      | 3617116 | 3617299 | +                | ssrS              | ncRNA                                                       |
| G2583_3564 | CDS        | 3617320 | 3617922 | +                | ygfA              | Putative ligase                                             |
| G2583_3565 | ncRNA      | 3617948 | 3618098 | +                | -                 | ncRNA                                                       |
| G2583_3566 | CDS        | 3618095 | 3618325 | -                | -                 | hypothetical protein                                        |
| G2583_3567 | ncRNA      | 3618341 | 3618491 | +                | -                 | ncRNA                                                       |
| G2583_3568 | CDS        | 3618704 | 3619936 | -                | serA              | D-3-phosphoglycerate dehydrogenase                          |
| G2583_3569 | CDS        | 3620191 | 3620850 | -                | rpiA              | Ribose 5-phosphate isomerase                                |
| G2583_3570 | CDS        | 3621233 | 3622126 | +                | argP              | Chromosome initiation inhibitor                             |
| G2583_3571 | CDS        | 3622330 | 3624474 | +                | scpA              | Methylmalonyl-CoA mutase                                    |
| G2583_3572 | CDS        | 3624467 | 3625462 | +                | argK              | LAO/AO transport system kinase                              |
| G2583_3573 | CDS        | 3625473 | 3626258 | +                | scpB              | Methylmalonyl-CoA decarboxylase                             |
| G2583_3574 | CDS        | 3626282 | 3627760 | +                | scpC              | Succinate CoA transferase                                   |
| G2583_3575 | pseudogene | 3627757 | 3628653 | -                | ygfI              | Uncharacterized HTH-type transcriptional regulator ygfI     |
| G2583_3576 | CDS        | 3628820 | 3629560 | -                | yggE              | hypothetical protein                                        |
| G2583_3577 | CDS        | 3629653 | 3630288 | -                | argO              | arginine exporter protein                                   |
| G2583_3578 | CDS        | 3630427 | 3631287 | -                | mscS              | Small-conductance mechanosensitive channel                  |
| G2583_3579 | CDS        | 3631645 | 3632724 | -                | fbaA              | Fructose-bisphosphate aldolase                              |
| G2583_3580 | CDS        | 3632939 | 3634102 | -                | pgk               | Phosphoglycerate kinase                                     |
| G2583_3581 | CDS        | 3634152 | 3635171 | -                | epd               | D-erythrose-4-phosphate dehydrogenase                       |
| G2583_3582 | CDS        | 3635543 | 3635974 | +                | -                 | hypothetical protein                                        |
| G2583_3583 | CDS        | 3635997 | 3636575 | +                | -                 | hypothetical protein                                        |
| G2583_3584 | CDS        | 3636576 | 3637283 | +                | -                 | hypothetical protein                                        |
| G2583_3585 | CDS        | 3637265 | 3637948 | +                | -                 | ABC transporter, ATP-binding protein                        |
| G2583_3586 | CDS        | 3637909 | 3638619 | +                | -                 | putative ATP-binding protein of ABC transport system        |
| G2583_3587 | CDS        | 3638591 | 3639304 | -                | yggC              | putative fructose transport system kinase                   |
| G2583_3588 | CDS        | 3639301 | 3639810 | -                | yggD              | Mannitol operon repressor                                   |
| G2583_3589 | CDS        | 3639832 | 3640797 | -                | yggF              | Fructose-1,6-bisphosphatase, class II                       |
| G2583_3590 | CDS        | 3640794 | 3642071 | -                | yggP              | L-sorbose 1-phosphate reductase                             |
| G2583_3591 | CDS        | 3642086 | 3643474 | -                | cmtA              | PTS system mannitol-specific EIICB component (EIICB-Mtl)    |

| Locus_tag  | Type       | Start   | End     | +/- <sup>a</sup> | Gene <sup>b</sup> | Product                                                    |
|------------|------------|---------|---------|------------------|-------------------|------------------------------------------------------------|
| G2583_3592 | CDS        | 3643502 | 3643945 | -                | cmtB              | hypothetical protein                                       |
| G2583_3593 | CDS        | 3644259 | 3646250 | -                | tktA              | transketolase                                              |
| G2583_3594 | CDS        | 3646402 | 3647286 | +                | yggG              | hypothetical protein                                       |
| G2583_3595 | CDS        | 3647492 | 3648412 | -                | speB              | agmatinase                                                 |
| G2583_3596 | CDS        | 3648548 | 3649279 | -                | -                 | hypothetical protein                                       |
| G2583_3597 | CDS        | 3649425 | 3651401 | -                | speA              | Biosynthetic arginine decarboxylase                        |
| G2583_3598 | CDS        | 3651410 | 3651556 | -                | yqgB              | hypothetical protein                                       |
| G2583_3599 | CDS        | 3651677 | 3651892 | +                | yqgC              | hypothetical protein                                       |
| G2583_3600 | CDS        | 3651889 | 3652155 | -                | yqgD              | hypothetical protein                                       |
| G2583_3601 | CDS        | 3652196 | 3653350 | +                | metK              | S-adenosylmethionine synthetase                            |
| G2583_3602 | CDS        | 3653787 | 3655181 | +                | galP              | Galactose-proton symporter                                 |
| G2583_3603 | CDS        | 3655258 | 3655755 | +                | yggI              | hypothetical protein                                       |
| G2583_3604 | CDS        | 3655850 | 3656557 | +                | endA              | Endonuclease I                                             |
| G2583_3605 | CDS        | 3656637 | 3657368 | +                | rsmE              | hypothetical protein                                       |
| G2583_3606 | CDS        | 3657381 | 3658328 | +                | gshB              | Glutathione synthetase                                     |
| G2583_3607 | CDS        | 3658440 | 3659003 | +                | yqgE              | UPF0301 protein yqgE                                       |
| G2583_3608 | CDS        | 3659003 | 3659419 | +                | yqgF              | Putative Holliday junction resolvase                       |
| G2583_3609 | CDS        | 3659610 | 3660635 | -                | yggR              | Twitching motility family protein                          |
| G2583_3610 | CDS        | 3660608 | 3661312 | +                | yggS              | UPF0001 protein yggS                                       |
| G2583_3611 | CDS        | 3661330 | 3661896 | +                | yggT              | putative resistance protein                                |
| G2583_3612 | CDS        | 3661893 | 3662183 | +                | yggU              | conserved hypothetical protein                             |
| G2583_3613 | CDS        | 3662191 | 3662784 | +                | rdgB              | Nucleoside-triphosphatase rdgB                             |
| G2583_3614 | CDS        | 3662777 | 3663913 | +                | yggW              | Putative oxygen-independent coproporphyrinogen III oxidase |
| G2583_3615 | CDS        | 3664065 | 3665072 | -                | yggM              | putative alpha helix chain                                 |
| G2583_3616 | CDS        | 3665189 | 3666235 | -                | ansB              | L-asparaginase 2                                           |
| G2583_3617 | CDS        | 3666411 | 3667130 | -                | yggN              | hypothetical protein                                       |
| G2583_3618 | CDS        | 3667314 | 3667640 | -                | yggL              | hypothetical protein                                       |
| G2583_3619 | CDS        | 3667640 | 3668359 | -                | trml              | tRNA (Guanine-N(7))-methyltransferase                      |
| G2583_3620 | CDS        | 3668520 | 3669572 | +                | mutY              | A/G-specific adenine glycosylase                           |
| G2583_3621 | CDS        | 3669600 | 3669875 | +                | yggX              | Probable Fe(2+)-trafficking protein                        |
| G2583_3622 | CDS        | 3669937 | 3671019 | +                | mltC              | Membrane-bound lytic murein transglycosylase C precursor   |
| G2583_3623 | CDS        | 3671173 | 3672477 | +                | nupG              | Transport of nucleosides, permease protein                 |
| G2583_3624 | CDS        | 3672527 | 3674722 | -                | speC              | Ornithine decarboxylase isozyme                            |
| G2583_3625 | CDS        | 3675060 | 3675767 | +                | yqgA              | putative transport protein                                 |
| G2583_3626 | tRNA       | 3675872 | 3675949 | +                | -                 | Phe tRNA                                                   |
| G2583_3627 | CDS        | 3676146 | 3677411 | +                | intB              | Site-specific recombinase, phage integrase family protein  |
| G2583_3628 | CDS        | 3677528 | 3678313 | -                | -                 | unknown protein encoded by ISEc8                           |
| G2583_3629 | CDS        | 3678402 | 3679076 | +                | ISSf14            | ISSf13 OrfA                                                |
| G2583_3630 | CDS        | 3679073 | 3679420 | +                | ISSf14            | ISSf14 ORF2                                                |
| G2583_3631 | CDS        | 3679440 | 3680888 | +                | ISSf14            | Transposase and inactivated derivatives                    |
| G2583_3632 | CDS        | 3680689 | 3681633 | -                | -                 | DNA helicase II                                            |
| G2583_3633 | CDS        | 3681742 | 3682383 | -                | PagC              | PagC-like membrane protein                                 |
| G2583_3634 | CDS        | 3682864 | 3683064 | -                | -                 | hypothetical protein                                       |
| G2583_3635 | pseudogene | 3683215 | 3684483 | +                | -                 | ISEc13 transposase                                         |
| G2583_3636 | CDS        | 3684836 | 3685063 | +                | -                 | ST51 protein                                               |
| G2583_3637 | CDS        | 3685271 | 3686920 | +                | ospD              | Ent protein                                                |
| G2583_3638 | pseudogene | 3687528 | 3688517 | +                | -                 | NleB                                                       |
| G2583_3639 | CDS        | 3688566 | 3689240 | +                | NleE              | ST47 protein                                               |
| G2583_3640 | CDS        | 3689999 | 3690463 | +                | -                 | Putative transposase                                       |
| G2583_3641 | CDS        | 3691115 | 3700786 | +                | lifA              | EHEC factor for adherence                                  |
| G2583_3642 | CDS        | 3700958 | 3701353 | +                | -                 | Transposase and inactivated derivatives                    |
| G2583_3643 | CDS        | 3701440 | 3701865 | +                | -                 | Transposase and inactivated derivatives                    |
| G2583_3644 | CDS        | 3701862 | 3702212 | +                | -                 | IS66 family transposase orfB                               |
| G2583_3645 | CDS        | 3702425 | 3703828 | +                | -                 | Transposase and inactivated derivatives                    |
| G2583_3646 | CDS        | 3703848 | 3704105 | +                | -                 | IS3                                                        |
| G2583_3647 | CDS        | 3704250 | 3704447 | -                | yagK              | hypothetical protein                                       |
| G2583_3648 | CDS        | 3704692 | 3705117 | -                | -                 | hypothetical protein                                       |
| G2583_3649 | CDS        | 3705114 | 3705497 | -                | -                 | DNA-directed RNA polymerase, beta subunit/140 kD subunit   |
| G2583_3650 | CDS        | 3705665 | 3705874 | -                | -                 | hypothetical protein                                       |
| G2583_3651 | CDS        | 3705871 | 3706197 | -                | yagK              | hypothetical protein                                       |

| Locus_tag  | Type | Start   | End     | +/- <sup>a</sup> | Gene <sup>b</sup> | Product                                                    |
|------------|------|---------|---------|------------------|-------------------|------------------------------------------------------------|
| G2583_3652 | CDS  | 3706397 | 3706591 | +                | -                 | hypothetical protein                                       |
| G2583_3653 | CDS  | 3706840 | 3707028 | -                | -                 | hypothetical protein                                       |
| G2583_3654 | CDS  | 3707743 | 3707949 | +                | -                 | Predicted transcriptional regulator                        |
| G2583_3655 | CDS  | 3708044 | 3708646 | +                | -                 | hypothetical protein                                       |
| G2583_3656 | CDS  | 3708936 | 3709232 | +                | -                 | ORFa1203                                                   |
| G2583_3657 | CDS  | 3709177 | 3710064 | +                | -                 | IS629 transposase orfB                                     |
| G2583_3658 | CDS  | 3710650 | 3710778 | +                | -                 | hypothetical protein                                       |
| G2583_3659 | CDS  | 3711105 | 3711977 | +                | -                 | hypothetical protein                                       |
| G2583_3660 | CDS  | 3712076 | 3712948 | +                | yfjP              | hypothetical protein                                       |
| G2583_3661 | CDS  | 3713320 | 3716133 | +                | flu               | Type V secretory pathway, adhesin AidA                     |
| G2583_3662 | CDS  | 3716165 | 3716512 | +                | insN              | unknown protein encoded by IS911 within prophage CP-933L   |
| G2583_3663 | CDS  | 3716725 | 3717378 | +                | -                 | putative transposase                                       |
| G2583_3664 | CDS  | 3717463 | 3717657 | +                | ykfF              | hypothetical protein                                       |
| G2583_3665 | CDS  | 3717812 | 3718630 | +                | -                 | hypothetical protein                                       |
| G2583_3666 | CDS  | 3718721 | 3719206 | +                | yfjX              | hypothetical protein                                       |
| G2583_3667 | CDS  | 3719221 | 3719697 | +                | yeeS              | DNA repair protein, RadC family                            |
| G2583_3668 | CDS  | 3719760 | 3719981 | +                | yeeT              | hypothetical protein                                       |
| G2583_3669 | CDS  | 3720055 | 3720423 | +                | yeeU              | Putative structural protein                                |
| G2583_3670 | CDS  | 3720512 | 3720775 | +                | yeeV              | hypothetical protein                                       |
| G2583_3671 | CDS  | 3720885 | 3721148 | +                | yeeW              | hypothetical protein                                       |
| G2583_3672 | CDS  | 3721263 | 3722804 | +                | tnpA              | Transposase for ISEc12                                     |
| G2583_3673 | CDS  | 3722816 | 3723565 | +                | tnpA              | TnpA                                                       |
| G2583_3674 | CDS  | 3723717 | 3723959 | +                | -                 | hypothetical protein                                       |
| G2583_3675 | CDS  | 3723926 | 3724168 | +                | -                 | hypothetical protein                                       |
| G2583_3676 | CDS  | 3724253 | 3725095 | +                | -                 | hypothetical protein                                       |
| G2583_3677 | CDS  | 3725376 | 3725912 | -                | yghD              | Putative general secretion pathway protein M-type yghD     |
| G2583_3678 | CDS  | 3725914 | 3727092 | -                | gspL              | Type II secretory pathway, component PulL                  |
| G2583_3679 | CDS  | 3727089 | 3728066 | -                | gspK              | General secretion pathway protein K                        |
| G2583_3680 | CDS  | 3728063 | 3728632 | -                | gspJ              | General secretion pathway protein GspJ                     |
| G2583_3681 | CDS  | 3728665 | 3729036 | -                | gspl              | General secretion pathway protein Gspl                     |
| G2583_3682 | CDS  | 3729033 | 3729596 | -                | gspH              | General secretion pathway protein H                        |
| G2583_3683 | CDS  | 3729600 | 3730055 | -                | gspG              | General secretion pathway protein G                        |
| G2583_3684 | CDS  | 3730072 | 3731295 | -                | gspF              | Hypothetical type II secretion protein                     |
| G2583_3685 | CDS  | 3731295 | 3732788 | -                | gspE              | Type II secretory pathway, ATPase PulE/Tfp pil us assembly |
| G2583_3686 | CDS  | 3732788 | 3734848 | -                | gspD              | General secretion pathway protein D                        |
| G2583_3687 | CDS  | 3734878 | 3735837 | -                | gspC              | General secretion pathway protein C                        |
| G2583_3688 | CDS  | 3735855 | 3736265 | -                | yghG              | Hypothetical lipoprotein                                   |
| G2583_3689 | CDS  | 3736331 | 3737266 | -                | pppA              | Putative prepilin peptidase A                              |
| G2583_3690 | CDS  | 3737467 | 3742026 | -                | yghJ              | Putative lipoprotein acfD-like protein precursor           |
| G2583_3691 | CDS  | 3742177 | 3742359 | +                | -                 | hypothetical protein                                       |
| G2583_3692 | CDS  | 3742374 | 3742496 | -                | -                 | hypothetical protein                                       |
| G2583_3693 | CDS  | 3742511 | 3744193 | -                | glcA              | Glycolate permease glcA                                    |
| G2583_3694 | CDS  | 3744548 | 3746719 | -                | glcB              | Malate synthase G                                          |
| G2583_3695 | CDS  | 3746741 | 3747145 | -                | glcG              | hypothetical protein                                       |
| G2583_3696 | CDS  | 3747150 | 3748373 | -                | glcF              | Glycolate oxidase iron-sulfur subunit                      |
| G2583_3697 | CDS  | 3748384 | 3749436 | -                | glcE              | Glycolate oxidase, subunit GlcE                            |
| G2583_3698 | CDS  | 3749436 | 3750935 | -                | glcD              | Glycolate oxidase subunit glcD                             |
| G2583_3699 | CDS  | 3751186 | 3751950 | +                | glcC              | Glc operon transcriptional activator                       |
| G2583_3700 | CDS  | 3751957 | 3753099 | -                | yghO              | hypothetical protein                                       |
| G2583_3701 | CDS  | 3753503 | 3755191 | +                | -                 | AMP-binding enzyme                                         |
| G2583_3702 | CDS  | 3755188 | 3756102 | +                | -                 | hypothetical protein                                       |
| G2583_3703 | CDS  | 3756155 | 3756382 | +                | -                 | Phosphopantetheine-binding                                 |
| G2583_3704 | CDS  | 3756382 | 3757554 | +                | -                 | 7-keto-8-aminopelargonate synthetase and related enzymes   |
| G2583_3705 | CDS  | 3757589 | 3758668 | -                | -                 | Permease YjgP/YjgQ family protein precursor                |
| G2583_3706 | CDS  | 3758665 | 3759735 | -                | -                 | Permease YjgP/YjgQ family protein precursor                |
| G2583_3707 | CDS  | 3759766 | 3760326 | -                | -                 | Protein ytfJ-like                                          |
| G2583_3708 | CDS  | 3760338 | 3761162 | -                | -                 | hypothetical protein                                       |
| G2583_3709 | CDS  | 3761162 | 3762511 | -                | yghQ              | Putative polysaccharide biosynthesis protein               |
| G2583_3710 | CDS  | 3762557 | 3763315 | -                | yghR              | Thymidylate kinase                                         |
| G2583_3711 | CDS  | 3763347 | 3764060 | -                | yghS              | Uncharacterized ATP-binding protein yghS                   |

| Locus_tag  | Type | Start   | End     | +/- <sup>a</sup> | Gene <sup>b</sup> | Product                                                     |
|------------|------|---------|---------|------------------|-------------------|-------------------------------------------------------------|
| G2583_3712 | CDS  | 3764234 | 3764668 | +                | yghT              | Uncharacterized ATP-binding protein yghT                    |
| G2583_3713 | CDS  | 3764975 | 3766474 | -                | pitB              | Probable low-affinity inorganic phosphate transporter 2     |
| G2583_3714 | CDS  | 3766766 | 3768625 | -                | gsp               | Glutathionylspermidine amidase/glutathionylspermidine       |
| G2583_3715 | CDS  | 3768782 | 3769696 | +                | yghU              | putative glutathione S-transferase YghU                     |
| G2583_3716 | CDS  | 3769819 | 3770067 | -                | hybG              | Hydrogenase-2 operon protein hybG                           |
| G2583_3717 | CDS  | 3770080 | 3770421 | -                | hybF              | Probable hydrogenase nickel incorporation protein hybF      |
| G2583_3718 | CDS  | 3770414 | 3770902 | -                | hybE              | Hydrogenase-2 operon protein hybE                           |
| G2583_3719 | CDS  | 3770895 | 3771389 | -                | hybD              | predicted maturation element for hydrogenase 2              |
| G2583_3720 | CDS  | 3771389 | 3773092 | -                | hybC              | Hydrogenase-2 large chain precursor                         |
| G2583_3721 | CDS  | 3773089 | 3774267 | -                | hybB              | Probable Ni/Fe-hydrogenase 2 b-type cytochrome subunit      |
| G2583_3722 | CDS  | 3774257 | 3775243 | -                | hybA              | Hydrogenase-2 operon protein hybA precursor                 |
| G2583_3723 | CDS  | 3775246 | 3776364 | -                | hybO              | Hydrogenase-2 small chain precursor                         |
| G2583_3724 | CDS  | 3776553 | 3776840 | -                | yghW              | hypothetical protein                                        |
| G2583_3725 | CDS  | 3776959 | 3777885 | -                | yghYX             | Putative enzyme                                             |
| G2583_3726 | CDS  | 3778003 | 3779043 | +                | yghZ              | aldo-keto reductase                                         |
| G2583_3727 | CDS  | 3779083 | 3779577 | -                | yqhA              | UPF0114 protein yqhA                                        |
| G2583_3728 | CDS  | 3779768 | 3780652 | +                | yghA              | Uncharacterized oxidoreductase yghA                         |
| G2583_3729 | CDS  | 3780924 | 3781349 | -                | exbD              | Biopolymer transport protein exbD                           |
| G2583_3730 | CDS  | 3781356 | 3782090 | -                | exbB              | Biopolymer transport protein exbB                           |
| G2583_3731 | CDS  | 3782083 | 3782238 | -                | -                 | hypothetical protein                                        |
| G2583_3732 | CDS  | 3782342 | 3783529 | +                | metC              | Cystathionine beta-lyase                                    |
| G2583_3733 | CDS  | 3783669 | 3784328 | +                | yghB              | Inner membrane protein yghB                                 |
| G2583_3734 | CDS  | 3784368 | 3785495 | -                | yqhC              | Putative ARAC-type regulatory protein                       |
| G2583_3735 | CDS  | 3785461 | 3786624 | +                | yqhD              | Alcohol dehydrogenase yqhD                                  |
| G2583_3736 | CDS  | 3786729 | 3787556 | +                | dkgA              | 2,5-diketo-D-gluconic acid reductase A                      |
| G2583_3737 | CDS  | 3787756 | 3788682 | +                | yqhG              | hypothetical protein                                        |
| G2583_3738 | CDS  | 3788731 | 3788988 | +                | yqhH              | predicted outer membrane lipoprotein                        |
| G2583_3739 | CDS  | 3789031 | 3791250 | -                | ygiQ              | UPF0313 protein ygiQ                                        |
| G2583_3740 | CDS  | 3791361 | 3792773 | -                | sufI              | repressor protein for FtsI                                  |
| G2583_3741 | CDS  | 3792848 | 3793585 | -                | plsC              | 1-acyl-sn-glycerol-3-phosphate acyltransferase              |
| G2583_3742 | CDS  | 3793819 | 3796077 | -                | parC              | DNA topoisomerase 4 subunit A                               |
| G2583_3743 | CDS  | 3796215 | 3797822 | -                | ygiS              | Bacterial extracellular solute-binding protein, family 5    |
| G2583_3744 | CDS  | 3797931 | 3798413 | -                | ygiV              | hypothetical protein                                        |
| G2583_3745 | CDS  | 3798466 | 3798858 | -                | ygiW              | Protein ygiW                                                |
| G2583_3746 | CDS  | 3799010 | 3799669 | +                | qseB              | DNA-binding response regulator in two-component regulatory  |
| G2583_3747 | CDS  | 3799666 | 3801015 | +                | qseC              | sensor protein QseC                                         |
| G2583_3748 | CDS  | 3801125 | 3801706 | +                | mdaB              | Modulator of drug activity B                                |
| G2583_3749 | CDS  | 3801737 | 3802051 | +                | ygiN              | Protein ygiN                                                |
| G2583_3750 | CDS  | 3802096 | 3802983 | -                | -                 | Iron transport system regulatory protein FitR               |
| G2583_3751 | CDS  | 3802980 | 3803990 | -                | -                 | Putative iron compound-binding protein of ABC transporter   |
| G2583_3752 | CDS  | 3803938 | 3804987 | -                | -                 | Putative iron compound permease protein of ABC transporter  |
| G2583_3753 | CDS  | 3804984 | 3805967 | -                | -                 | Iron ABC transporter, permease protein FitC                 |
| G2583_3754 | CDS  | 3805964 | 3806773 | -                | FepC              | Iron ABC transporter, ATP binding protein FitB              |
| G2583_3755 | CDS  | 3807147 | 3809288 | +                | -                 | TonB-dependent outer membrane ferric coprogen receptor FitA |
| G2583_3756 | CDS  | 3809352 | 3811244 | -                | parE              | DNA topoisomerase IV, B subunit                             |
| G2583_3757 | CDS  | 3811273 | 3811854 | -                | yqiA              | Esterase yqiA                                               |
| G2583_3758 | CDS  | 3811854 | 3812681 | -                | cpdA              | cyclic 3',5'-adenosine monophosphate phosphodiesterase      |
| G2583_3759 | CDS  | 3812706 | 3813128 | -                | yqiB              | hypothetical protein                                        |
| G2583_3760 | CDS  | 3813129 | 3813758 | -                | nudF              | ADP-ribose pyrophosphatase                                  |
| G2583_3761 | CDS  | 3813924 | 3815444 | +                | tolC              | Outer membrane protein TolC                                 |
| G2583_3762 | CDS  | 3815444 | 3815704 | +                | ygiA              | hypothetical protein                                        |
| G2583_3763 | CDS  | 3815592 | 3816263 | +                | ygiB              | UPF0441 protein ygiB                                        |
| G2583_3764 | CDS  | 3816269 | 3817429 | +                | ygiC              | putative synthetase/amidase                                 |
| G2583_3765 | CDS  | 3817467 | 3818282 | -                | ygiD              | Aromatic ring-opening dioxygenase                           |
| G2583_3766 | CDS  | 3818398 | 3819171 | +                | zupT              | Zinc transporter zupT                                       |
| G2583_3767 | CDS  | 3819229 | 3819399 | -                | -                 | hypothetical protein                                        |
| G2583_3768 | CDS  | 3819661 | 3820314 | -                | ribB              | 3,4-dihydroxy-2-butanone 4-phosphate synthase               |
| G2583_3769 | CDS  | 3820652 | 3820987 | +                | yqiC              | hypothetical protein                                        |
| G2583_3770 | CDS  | 3821022 | 3821228 | -                | glgS              | Glycogen synthesis protein glgS                             |
| G2583_3771 | CDS  | 3821491 | 3822105 | +                | yqiJ              | Putative oxidoreductase                                     |

| Locus_tag  | Type  | Start   | End     | +/- <sup>a</sup> | Gene <sup>b</sup> | Product                                                  |
|------------|-------|---------|---------|------------------|-------------------|----------------------------------------------------------|
| G2583_3772 | CDS   | 3822147 | 3823808 | +                | yqjK              | SPFH/band 7 domain protein                               |
| G2583_3773 | ncRNA | 3824032 | 3824181 | -                | -                 | ncRNA                                                    |
| G2583_3774 | CDS   | 3824143 | 3824535 | +                | -                 | hypothetical protein                                     |
| G2583_3775 | ncRNA | 3824408 | 3824557 | -                | -                 | ncRNA                                                    |
| G2583_3776 | CDS   | 3824602 | 3826035 | -                | rfaE              | Bifunctional protein hldE [Includes: D-beta-D-heptose 7- |
| G2583_3777 | CDS   | 3826083 | 3828923 | -                | glnE              | bifunctional glutamine-synthetase                        |
| G2583_3778 | CDS   | 3828946 | 3830247 | -                | ygiF              | Adenylate cyclase                                        |
| G2583_3779 | CDS   | 3830489 | 3831109 | +                | htrG              | putative signal transduction protein                     |
| G2583_3780 | CDS   | 3831173 | 3832411 | +                | cca               | TRNA nucleotidyltransferase                              |
| G2583_3781 | CDS   | 3832592 | 3833413 | -                | bacA              | Putative undecaprenol kinase                             |
| G2583_3782 | CDS   | 3833504 | 3833875 | -                | folB              | Dihydroneopterin aldolase                                |
| G2583_3783 | CDS   | 3833978 | 3834595 | +                | ygiH              | UPF0078 membrane protein ygiH                            |
| G2583_3784 | CDS   | 3834608 | 3835540 | -                | ttdR              | transcriptional activator TtdR                           |
| G2583_3785 | CDS   | 3835747 | 3836658 | +                | ttdA              | L(+)-tartrate dehydratase subunit alpha                  |
| G2583_3786 | CDS   | 3836655 | 3837260 | +                | ttdB              | L(+)-tartrate dehydratase subunit beta                   |
| G2583_3787 | CDS   | 3837309 | 3838772 | +                | ttdT              | L-tartrate/succinate antiporter                          |
| G2583_3788 | CDS   | 3838815 | 3839828 | -                | ygiD              | Probable O-sialoglycoprotein endopeptidase               |
| G2583_3789 | CDS   | 3840066 | 3840281 | +                | rpsU              | Ribosomal protein S21                                    |
| G2583_3790 | CDS   | 3840392 | 3842137 | +                | dnaG              | DNA primase                                              |
| G2583_3791 | CDS   | 3842332 | 3844173 | +                | rpoD              | RNA polymerase sigma factor RpoD                         |
| G2583_3792 | CDS   | 3844252 | 3844758 | -                | mug               | G/U mismatch-specific DNA glycosylase                    |
| G2583_3793 | tRNA  | 3844882 | 3844959 | +                | -                 | Met tRNA                                                 |
| G2583_3794 | CDS   | 3845012 | 3845776 | -                | yqjH              | Siderophore-interacting protein                          |
| G2583_3795 | CDS   | 3846064 | 3846687 | +                | yqjI              | transcriptional regulator, PadR family                   |
| G2583_3796 | CDS   | 3846841 | 3848361 | -                | aer               | Aerotaxis receptor                                       |
| G2583_3797 | CDS   | 3848752 | 3850158 | +                | ygiG              | Ornithine/acetylnithine aminotransferase                 |
| G2583_3798 | CDS   | 3850200 | 3850532 | -                | ygiH              | T-RNA-binding domain protein                             |
| G2583_3799 | CDS   | 3850751 | 3851734 | +                | ebgR              | DNA-binding transcriptional repressor                    |
| G2583_3800 | CDS   | 3851918 | 3855010 | +                | ebgA              | Evolved beta-D-galactosidase, alpha subunit              |
| G2583_3801 | CDS   | 3855007 | 3855456 | +                | ebgC              | Evolved beta-galactosidase subunit beta                  |
| G2583_3802 | CDS   | 3855519 | 3856952 | +                | ygiI              | Amino acid permease family protein                       |
| G2583_3803 | CDS   | 3857086 | 3858156 | +                | ygiJ              | hypothetical protein                                     |
| G2583_3804 | CDS   | 3858173 | 3860524 | +                | ygiK              | predicted glycosyl hydrolase                             |
| G2583_3805 | CDS   | 3861050 | 3863068 | +                | fadH              | 2,4-dienoyl-CoA reductase                                |
| G2583_3806 | CDS   | 3863113 | 3863529 | -                | ygiM              | Helix-turn-helix DNA-binding domain protein              |
| G2583_3807 | CDS   | 3863526 | 3863840 | -                | ygiN              | hypothetical protein                                     |
| G2583_3808 | CDS   | 3864124 | 3865260 | -                | rlmG              | Putative enzyme                                          |
| G2583_3809 | CDS   | 3865309 | 3865848 | +                | ygiP              | hypothetical protein                                     |
| G2583_3810 | CDS   | 3865925 | 3866617 | +                | ygiQ              | Putative SanA protein                                    |
| G2583_3811 | CDS   | 3866696 | 3867682 | +                | ygiR              | Oxidoreductase, NAD binding                              |
| G2583_3812 | CDS   | 3867966 | 3868931 | +                | alx               | Inner membrane protein alx                               |
| G2583_3813 | CDS   | 3869330 | 3870574 | +                | sstT              | Sodium:serine/threonine symporter                        |
| G2583_3814 | CDS   | 3870579 | 3871130 | -                | ygiV              | Putative inner membrane protein                          |
| G2583_3815 | CDS   | 3871213 | 3872700 | -                | uxaA              | Altronate dehydratase                                    |
| G2583_3816 | CDS   | 3872715 | 3874127 | -                | uxaC              | Uronate isomerase                                        |
| G2583_3817 | CDS   | 3874490 | 3875908 | +                | exuT              | Hexuronate transporter                                   |
| G2583_3818 | CDS   | 3876038 | 3876814 | +                | exuR              | Exu regulon transcriptional regulator                    |
| G2583_3819 | CDS   | 3877159 | 3877821 | +                | yqiA              | hypothetical protein                                     |
| G2583_3820 | CDS   | 3877825 | 3878208 | +                | yqiB              | hypothetical protein                                     |
| G2583_3821 | CDS   | 3878340 | 3878723 | +                | yqiC              | hypothetical protein                                     |
| G2583_3822 | CDS   | 3878761 | 3879066 | +                | yqiD              | hypothetical protein                                     |
| G2583_3823 | CDS   | 3879069 | 3879473 | +                | yqiE              | ORF_o157                                                 |
| G2583_3824 | CDS   | 3879463 | 3879762 | +                | yqiK              | hypothetical protein                                     |
| G2583_3825 | CDS   | 3879858 | 3880340 | +                | yqiF              | Putative inner membrane protein YqiF                     |
| G2583_3826 | CDS   | 3880410 | 3881396 | +                | yqiG              | putative transferase                                     |
| G2583_3827 | CDS   | 3881688 | 3882053 | +                | yhaH              | putative inner membrane protein YhaH                     |
| G2583_3828 | CDS   | 3882295 | 3882651 | +                | yhaI              | Inner membrane protein yhaI                              |
| G2583_3829 | CDS   | 3882702 | 3883598 | -                | yhaJ              | putative transcriptional regulator LYSR-type             |
| G2583_3830 | CDS   | 3883703 | 3884404 | +                | yhaK              | Pirin-like protein yhaK                                  |
| G2583_3831 | CDS   | 3884421 | 3884591 | +                | yhaL              | hypothetical protein                                     |



| Locus_tag  | Type       | Start   | End     | +/- <sup>a</sup> | Gene <sup>b</sup> | Product                                                   |
|------------|------------|---------|---------|------------------|-------------------|-----------------------------------------------------------|
| G2583_3832 | CDS        | 3884725 | 3886035 | -                | yhaM              | UPF0597 protein yhaM                                      |
| G2583_3833 | CDS        | 3886063 | 3887394 | -                | yhaO              | putative transport system permease protein                |
| G2583_3834 | CDS        | 3887669 | 3889039 | -                | tdcG              | L-serine ammonia-lyase TdcG                               |
| G2583_3835 | CDS        | 3889105 | 3889557 | -                | tdcF              | TdcF protein                                              |
| G2583_3836 | CDS        | 3889508 | 3891802 | -                | tdcE              | Keto-acid formate acetyltransferase                       |
| G2583_3837 | CDS        | 3891836 | 3893056 | -                | tdcD              | Putative kinase                                           |
| G2583_3838 | CDS        | 3893070 | 3894401 | -                | tdcC              | Threonine/serine transporter tdcC (H+)/threonine-serine   |
| G2583_3839 | CDS        | 3894423 | 3895412 | -                | tdcB              | Threonine dehydratase catabolic                           |
| G2583_3840 | CDS        | 3895511 | 3896449 | -                | tdcA              | DNA-binding transcriptional activator                     |
| G2583_3841 | CDS        | 3896638 | 3896982 | +                | tdcR              | Threonine dehydratase operon activator protein            |
| G2583_3842 | CDS        | 3897217 | 3897777 | +                | yhaB              | hypothetical protein                                      |
| G2583_3843 | CDS        | 3897799 | 3898986 | +                | yhaC              | hypothetical protein                                      |
| G2583_3844 | CDS        | 3899047 | 3899574 | +                | -                 | hypothetical protein                                      |
| G2583_3845 | ncRNA      | 3899115 | 3899409 | -                | rnpB              | ncRNA                                                     |
| G2583_3846 | CDS        | 3899502 | 3900728 | -                | garK              | hypothetical protein                                      |
| G2583_3847 | CDS        | 3900744 | 3901634 | -                | garR              | 2-hydroxy-3-oxopropionate reductase                       |
| G2583_3848 | CDS        | 3901664 | 3902434 | -                | garL              | 2-dehydro-3-deoxyglucarate aldolase                       |
| G2583_3849 | CDS        | 3902450 | 3903784 | -                | garP              | Probable galactarate transporter                          |
| G2583_3850 | CDS        | 3904159 | 3905730 | +                | garD              | Galactarate dehydratase                                   |
| G2583_3851 | CDS        | 3905879 | 3906214 | +                | sohA              | HtrA suppressor protein                                   |
| G2583_3852 | CDS        | 3906214 | 3906678 | +                | yhaV              | hypothetical protein                                      |
| G2583_3853 | CDS        | 3906733 | 3907542 | -                | agaR              | Putative aga operon transcriptional repressor             |
| G2583_3854 | CDS        | 3907791 | 3909071 | +                | kbaZ              | D-tagatose-bisphosphate aldolase, class II, non-catalytic |
| G2583_3855 | CDS        | 3909058 | 3909567 | +                | agaV              | N-acetylgalactosamine-specific PTS system enzyme IIB      |
| G2583_3856 | CDS        | 3909578 | 3910357 | +                | agaW              | Putative phosphotransferase system enzyme subunit         |
| G2583_3857 | CDS        | 3910347 | 3911225 | +                | agaE              | PTS system N-acetylgalactosamine-specific, IID component  |
| G2583_3858 | CDS        | 3911243 | 3911677 | +                | agaF              | PTS system, mannose/sorbose-specific, IIA component       |
| G2583_3859 | CDS        | 3911653 | 3912807 | +                | agaA              | N-acetylgalactosamine-6-phosphate deacetylase             |
| G2583_3860 | CDS        | 3913158 | 3914312 | +                | agaS              | Putative sugar isomerase, AgaS family                     |
| G2583_3861 | CDS        | 3914325 | 3915185 | +                | kbaY              | Tagatose-1,6-bisphosphate aldolase kbaY                   |
| G2583_3862 | CDS        | 3915352 | 3915828 | +                | agaB              | PTS system, D galactosamine-specific, IIB component       |
| G2583_3863 | CDS        | 3915867 | 3916670 | +                | agaC              | N-acetylgalactosamine permease IIC component 1            |
| G2583_3864 | CDS        | 3916660 | 3917451 | +                | agaD              | N-acetylglucosamine transport enzyme IID component 1      |
| G2583_3865 | pseudogene | 3917452 | 3918208 | +                | agal              | putative galactosamine-6-phosphate isomerase              |
| G2583_3866 | CDS        | 3918609 | 3919193 | +                | yraH              | Putative type 1 fimbrial protein                          |
| G2583_3867 | CDS        | 3919273 | 3919968 | +                | yraI              | Gram-negative pili assembly chaperone protein             |
| G2583_3868 | CDS        | 3919922 | 3922513 | +                | yraJ              | Fimbrial usher family protein                             |
| G2583_3869 | CDS        | 3922326 | 3923615 | +                | yraK              | Putative fimbrial protein                                 |
| G2583_3870 | CDS        | 3923658 | 3924518 | -                | yraL              | UPF0011 protein yraL                                      |
| G2583_3871 | CDS        | 3924583 | 3926619 | +                | yraM              | hypothetical protein                                      |
| G2583_3872 | CDS        | 3926577 | 3926972 | +                | yraN              | UPF0102 protein yraN                                      |
| G2583_3873 | CDS        | 3926992 | 3927582 | +                | diaA              | DnaA initiator-associating protein diaA                   |
| G2583_3874 | CDS        | 3927592 | 3928167 | +                | yraP              | hypothetical protein                                      |
| G2583_3875 | CDS        | 3928281 | 3929321 | -                | yraQ              | Putative permease                                         |
| G2583_3876 | CDS        | 3929394 | 3930074 | -                | yraR              | hypothetical protein                                      |
| G2583_3877 | CDS        | 3930115 | 3930675 | +                | yhbO              | hypothetical protein                                      |
| G2583_3878 | CDS        | 3930655 | 3931098 | -                | yhbP              | UPF0306 protein yhbP                                      |
| G2583_3879 | CDS        | 3931149 | 3931451 | +                | yhbQ              | UPF0213 protein yhbQ                                      |
| G2583_3880 | CDS        | 3931438 | 3931941 | -                | yhbS              | Uncharacterized acetyltransferase yhbS                    |
| G2583_3881 | CDS        | 3931935 | 3932459 | -                | yhbT              | hypothetical protein                                      |
| G2583_3882 | CDS        | 3932668 | 3933663 | +                | yhbU              | Peptidase, U32 family                                     |
| G2583_3883 | CDS        | 3933654 | 3934550 | +                | yhbV              | hypothetical protein                                      |
| G2583_3884 | CDS        | 3934631 | 3935638 | +                | yhbW              | Monooxygenase, luciferase family                          |
| G2583_3885 | CDS        | 3935755 | 3936915 | -                | mtr               | Tryptophan-specific transport protein                     |
| G2583_3886 | CDS        | 3937153 | 3939042 | -                | deaD              | Cold-shock DEAD-box protein A                             |
| G2583_3887 | CDS        | 3939222 | 3940106 | -                | nlpl              | Lipoprotein nlpl precursor                                |
| G2583_3888 | CDS        | 3940215 | 3942419 | -                | pnp               | Polynucleotide phosphorylase/polyadenylase                |
| G2583_3889 | ncRNA      | 3942409 | 3942580 | +                | -                 | ncRNA                                                     |
| G2583_3890 | CDS        | 3942597 | 3942866 | -                | rpsO              | 30S ribosomal protein S15                                 |
| G2583_3891 | CDS        | 3943015 | 3943959 | -                | truB              | tRNA pseudouridine synthase B                             |

| Locus_tag  | Type  | Start   | End     | +/- <sup>a</sup> | Gene <sup>b</sup> | Product                                                    |
|------------|-------|---------|---------|------------------|-------------------|------------------------------------------------------------|
| G2583_3892 | CDS   | 3943959 | 3944360 | -                | rbfA              | Ribosome-binding factor A                                  |
| G2583_3893 | CDS   | 3944525 | 3947197 | -                | infB              | Translation initiation factor IF-2                         |
| G2583_3894 | CDS   | 3947222 | 3948709 | -                | nusA              | Transcription elongation protein nusA                      |
| G2583_3895 | CDS   | 3948737 | 3949195 | -                | yhbC              | hypothetical protein                                       |
| G2583_3896 | tRNA  | 3949396 | 3949472 | -                | -                 | Met tRNA                                                   |
| G2583_3897 | CDS   | 3949820 | 3951163 | +                | argG              | Argininosuccinate synthase                                 |
| G2583_3898 | CDS   | 3951171 | 3952829 | -                | yhbX              | Outer-membrane protein yhbX                                |
| G2583_3899 | tRNA  | 3953254 | 3953342 | -                | -                 | Leu tRNA                                                   |
| G2583_3900 | CDS   | 3953356 | 3953688 | -                | secG              | Preprotein translocase IISP family, auxillary membrane     |
| G2583_3901 | CDS   | 3953916 | 3955253 | -                | glmM              | Phosphoglucosamine mutase                                  |
| G2583_3902 | CDS   | 3955246 | 3956094 | -                | folP              | 7,8-dihydropteroate synthase                               |
| G2583_3903 | CDS   | 3956184 | 3958118 | -                | hflB              | Cell division protease ftsH                                |
| G2583_3904 | CDS   | 3958218 | 3958847 | -                | rrmJ              | Ribosomal RNA large subunit methyltransferase J (rRNA      |
| G2583_3905 | CDS   | 3958973 | 3959266 | +                | yhbY              | hypothetical protein                                       |
| G2583_3906 | CDS   | 3959422 | 3959898 | -                | greA              | Transcription elongation factor greA                       |
| G2583_3907 | CDS   | 3960146 | 3961579 | +                | dacB              | D-alanyl-D-alanine carboxypeptidase/D-alanyl-D-alanine-    |
| G2583_3908 | CDS   | 3961619 | 3962791 | -                | obgE              | GTP-binding protein Obg/CgtA                               |
| G2583_3909 | CDS   | 3962807 | 3963772 | -                | yhbE              | Uncharacterized inner membrane transporter yhbE            |
| G2583_3910 | CDS   | 3963899 | 3964156 | -                | rpmA              | 50S ribosomal protein L27                                  |
| G2583_3911 | CDS   | 3964177 | 3964488 | -                | rplU              | 50S ribosomal protein L21                                  |
| G2583_3912 | CDS   | 3964747 | 3965718 | +                | ispB              | hypothetical protein                                       |
| G2583_3913 | CDS   | 3965947 | 3966225 | +                | sfsB              | Sugar fermentation stimulation protein B                   |
| G2583_3914 | CDS   | 3966273 | 3967532 | -                | murA              | UDP-N-acetylglucosamine 1-carboxyvinyltransferase          |
| G2583_3915 | CDS   | 3967587 | 3967856 | -                | yrbA              | Predicted transcriptional regulator, BolA superfamily      |
| G2583_3916 | CDS   | 3968001 | 3968390 | -                | yrbB              | hypothetical protein                                       |
| G2583_3917 | CDS   | 3968294 | 3968929 | -                | yrbC              | Toluene tolerance protein Ttg2D                            |
| G2583_3918 | CDS   | 3968948 | 3969499 | -                | yrbD              | hypothetical protein                                       |
| G2583_3919 | CDS   | 3969504 | 3970286 | -                | yrbE              | UPF0393 inner membrane protein yrbE                        |
| G2583_3920 | CDS   | 3970294 | 3971103 | -                | yrbF              | Uncharacterized ABC transporter ATP-binding protein yrbF   |
| G2583_3921 | CDS   | 3971313 | 3972290 | +                | yrbG              | Sodium/calcium exchanger protein                           |
| G2583_3922 | CDS   | 3972304 | 3973290 | +                | kdsD              | Arabinose 5-phosphate isomerase                            |
| G2583_3923 | CDS   | 3973311 | 3973877 | +                | kdsC              | 3-deoxy-D-manno-octulosonate 8-phosphate phosphatase       |
| G2583_3924 | CDS   | 3973874 | 3974449 | +                | yrbK              | hypothetical protein                                       |
| G2583_3925 | CDS   | 3974418 | 3974975 | +                | lptA              | Protein yhbN precursor                                     |
| G2583_3926 | CDS   | 3974982 | 3975707 | +                | lptB              | Uncharacterized ABC transporter ATP-binding protein yhbG   |
| G2583_3927 | CDS   | 3975755 | 3977188 | +                | rpoN              | RNA polymerase sigma-54 factor                             |
| G2583_3928 | CDS   | 3977211 | 3977498 | +                | hpf               | Probable sigma(54) modulation protein                      |
| G2583_3929 | CDS   | 3977616 | 3978107 | +                | ptsN              | PTS IIA-like nitrogen-regulatory protein PtsN              |
| G2583_3930 | CDS   | 3978153 | 3979007 | +                | yhbJ              | UPF0042 protein yhbJ                                       |
| G2583_3931 | CDS   | 3979004 | 3979276 | +                | npr               | Phosphocarrier protein NPr                                 |
| G2583_3932 | CDS   | 3979490 | 3980122 | +                | yrbL              | hypothetical protein                                       |
| G2583_3933 | CDS   | 3980119 | 3980847 | -                | mtgA              | Monofunctional biosynthetic peptidoglycan transglycosylase |
| G2583_3934 | CDS   | 3980844 | 3981506 | -                | elbB              | Sigma cross-reacting protein 27A                           |
| G2583_3935 | ncRNA | 3981615 | 3981722 | +                | -                 | ncRNA                                                      |
| G2583_3936 | CDS   | 3981727 | 3984063 | -                | arcB              | Aerobic respiration control sensor protein arcB            |
| G2583_3937 | CDS   | 3984159 | 3985088 | -                | yhcC              | hypothetical protein                                       |
| G2583_3938 | CDS   | 3985669 | 3990222 | +                | gltB              | Glutamate synthase (NADPH), large subunit                  |
| G2583_3939 | CDS   | 3990235 | 3991653 | +                | gltD              | Glutamate synthase (NADPH), small subunit                  |
| G2583_3940 | CDS   | 3991837 | 3992964 | +                | yhcG              | conserved hypothetical protein                             |
| G2583_3941 | CDS   | 3993024 | 3993488 | -                | yhcH              | hypothetical protein                                       |
| G2583_3942 | CDS   | 3993485 | 3994360 | -                | nanK              | N-acetylmannosamine kinase                                 |
| G2583_3943 | CDS   | 3994357 | 3995046 | -                | nanE              | Putative N-acetylmannosamine-6-phosphate 2-epimerase       |
| G2583_3944 | CDS   | 3995094 | 3996584 | -                | nanT              | Sialic acid transporter                                    |
| G2583_3945 | CDS   | 3996693 | 3997586 | -                | nanA              | N-acetylneuraminatase lyase                                |
| G2583_3946 | CDS   | 3997708 | 3998499 | -                | nanR              | Transcriptional regulators                                 |
| G2583_3947 | CDS   | 3998879 | 4000246 | +                | dcuD              | Putative C4-dicarboxylate carrier protein                  |
| G2583_3948 | CDS   | 4000289 | 4000786 | -                | sspB              | Stringent starvation protein B                             |
| G2583_3949 | CDS   | 4000792 | 4001430 | -                | sspA              | Stringent starvation protein A                             |
| G2583_3950 | CDS   | 4001825 | 4002217 | -                | rpsL              | 30S ribosomal protein S9                                   |
| G2583_3951 | CDS   | 4002233 | 4002661 | -                | rplM              | 50S ribosomal protein L13                                  |

| Locus_tag  | Type       | Start   | End     | +/- <sup>a</sup> | Gene <sup>b</sup> | Product                                                       |
|------------|------------|---------|---------|------------------|-------------------|---------------------------------------------------------------|
| G2583_3952 | CDS        | 4002880 | 4004007 | -                | yhcM              | hypothetical protein                                          |
| G2583_3953 | CDS        | 4004195 | 4004599 | +                | yhcB              | hypothetical protein                                          |
| G2583_3954 | CDS        | 4004753 | 4006120 | +                | degQ              | Serine peptidase DegQ                                         |
| G2583_3955 | CDS        | 4006210 | 4007277 | +                | degS              | Protease degS precursor                                       |
| G2583_3956 | CDS        | 4007341 | 4008345 | -                | mdh               | Malate dehydrogenase                                          |
| G2583_3957 | CDS        | 4008714 | 4009184 | +                | argR              | Arginine repressor                                            |
| G2583_3958 | CDS        | 4009500 | 4009814 | +                | yhcN              | hypothetical protein                                          |
| G2583_3959 | CDS        | 4009870 | 4010142 | -                | yhcO              | hypothetical protein                                          |
| G2583_3960 | CDS        | 4010234 | 4012201 | -                | aaeB              | p-hydroxybenzoic acid efflux pump subunit aaeB                |
| G2583_3961 | CDS        | 4012207 | 4013139 | -                | aaeA              | p-hydroxybenzoic acid efflux pump subunit aaeA                |
| G2583_3962 | CDS        | 4013147 | 4013419 | -                | aaeX              | hypothetical protein                                          |
| G2583_3963 | CDS        | 4013533 | 4014462 | +                | aaeR              | putative DNA-binding transcriptional regulator                |
| G2583_3964 | CDS        | 4014590 | 4016035 | -                | tldD              | suppresses inhibitory activity of CsrA                        |
| G2583_3965 | CDS        | 4016191 | 4019991 | -                | yhdP              | hypothetical protein                                          |
| G2583_3966 | CDS        | 4020059 | 4021528 | -                | rng               | Ribonuclease G                                                |
| G2583_3967 | CDS        | 4021518 | 4022111 | -                | yhdE              | Maf-like protein yhdE                                         |
| G2583_3968 | CDS        | 4022120 | 4022608 | -                | mreD              | Rod shape-determining protein                                 |
| G2583_3969 | CDS        | 4022608 | 4023711 | -                | mreC              | Rod shape-determining protein MreC                            |
| G2583_3970 | CDS        | 4023777 | 4024880 | -                | mreB              | Rod shape-determining protein mreB                            |
| G2583_3971 | CDS        | 4025125 | 4027065 | -                | csrD              | Cyclic diguanylate phosphodiesterase (EAL) domain             |
| G2583_3972 | CDS        | 4027217 | 4028191 | +                | yhdH              | Quinone oxidoreductase, YhdH family                           |
| G2583_3973 | CDS        | 4028249 | 4028350 | -                | -                 | hypothetical protein                                          |
| G2583_3974 | CDS        | 4029169 | 4029639 | +                | accB              | acetyl-CoA carboxylase, biotin carboxyl carrier protein       |
| G2583_3975 | CDS        | 4029650 | 4030999 | +                | accC              | Acetyl CoA carboxylase, biotin carboxylase subunit            |
| G2583_3976 | CDS        | 4031108 | 4031350 | +                | yhdT              | hypothetical protein                                          |
| G2583_3977 | CDS        | 4031340 | 4032791 | +                | panF              | Sodium/pantothenate symporter                                 |
| G2583_3978 | CDS        | 4032803 | 4033684 | +                | prmA              | Ribosomal protein L11 methyltransferase                       |
| G2583_3979 | CDS        | 4034013 | 4034978 | +                | dusB              | tRNA-dihydrouridine synthase B                                |
| G2583_3980 | CDS        | 4035004 | 4035300 | +                | fis               | DNA-binding protein fis                                       |
| G2583_3981 | CDS        | 4035385 | 4036269 | +                | yhdJ              | DNA methylase, N4/N6-methyltransferase family                 |
| G2583_3982 | CDS        | 4036353 | 4036532 | +                | yhdU              | hypothetical protein                                          |
| G2583_3983 | CDS        | 4036535 | 4037197 | -                | envR              | Probable acrEF/envCD operon repressor                         |
| G2583_3984 | CDS        | 4037596 | 4038753 | +                | acrE              | Acriflavine resistance protein E                              |
| G2583_3985 | CDS        | 4038765 | 4041869 | +                | acrF              | Transporter, hydrophobe/amphiphile efflux-1 (HAE1) family     |
| G2583_3986 | CDS        | 4042122 | 4042343 | +                | yhdV              | hypothetical protein                                          |
| G2583_3987 | CDS        | 4042774 | 4043799 | +                | yhdW              | Putative amino-acid ABC transporter-binding protein yhdW      |
| G2583_3988 | CDS        | 4043867 | 4045048 | +                | yhdX              | Amino acid ABC transporter, permease protein,                 |
| G2583_3989 | pseudogene | 4045058 | 4046161 | +                | yhdY              | general L-amino acid transport system permease protein AapM   |
| G2583_3990 | CDS        | 4046169 | 4046927 | +                | yhdZ              | Amino acid ABC transporter, ATP-binding protein               |
| G2583_3991 | rRNA       | 4047158 | 4047273 | -                | rrfD              | 5S ribosomal RNA                                              |
| G2583_3992 | tRNA       | 4047312 | 4047389 | -                | -                 | Thr tRNA                                                      |
| G2583_3993 | rRNA       | 4047403 | 4047518 | -                | rrfD              | 5S ribosomal RNA                                              |
| G2583_3994 | rRNA       | 4047613 | 4050515 | -                | rrlD              | 23S ribosomal RNA                                             |
| G2583_3995 | tRNA       | 4050698 | 4050775 | -                | -                 | Ala tRNA                                                      |
| G2583_3996 | tRNA       | 4050817 | 4050893 | -                | -                 | Ile tRNA                                                      |
| G2583_3997 | rRNA       | 4050962 | 4052503 | -                | rrsD              | 16S ribosomal RNA                                             |
| G2583_3998 | CDS        | 4052649 | 4053530 | +                | yrdA              | hypothetical protein                                          |
| G2583_3999 | CDS        | 4053506 | 4053763 | -                | yrdB              | hypothetical protein                                          |
| G2583_4000 | CDS        | 4053760 | 4054578 | -                | aroE              | Shikimate dehydrogenase                                       |
| G2583_4001 | CDS        | 4054583 | 4055200 | -                | rimN              | Sua5/YciO/YrdC/YwC family protein                             |
| G2583_4002 | CDS        | 4055160 | 4055702 | -                | yrdD              | predicted DNA topoisomerase                                   |
| G2583_4003 | CDS        | 4055731 | 4056204 | -                | smg               | hypothetical protein                                          |
| G2583_4004 | CDS        | 4056176 | 4057300 | -                | smf               | hypothetical protein                                          |
| G2583_4005 | CDS        | 4057430 | 4057939 | +                | def               | Peptide deformylase                                           |
| G2583_4006 | CDS        | 4057954 | 4058901 | +                | fmt               | Methionyl-tRNA formyltransferase                              |
| G2583_4007 | CDS        | 4058947 | 4060236 | +                | rsmB              | Ribosomal RNA small subunit methyltransferase B (rRNA)        |
| G2583_4008 | CDS        | 4060258 | 4061634 | +                | trkA              | Trk system potassium uptake protein trkA (K(+)-uptake protein |
| G2583_4009 | CDS        | 4061764 | 4062174 | +                | mscL              | Large-conductance mechanosensitive channel                    |
| G2583_4010 | CDS        | 4062445 | 4062870 | -                | zntR              | zinc-responsive transcriptional regulator                     |
| G2583_4011 | CDS        | 4062881 | 4063249 | -                | yhdN              | hypothetical protein                                          |

| Locus_tag  | Type | Start   | End     | +/- <sup>a</sup> | Gene <sup>b</sup> | Product                                                         |
|------------|------|---------|---------|------------------|-------------------|-----------------------------------------------------------------|
| G2583_4012 | CDS  | 4063356 | 4063739 | -                | rplQ              | 50S ribosomal protein L17                                       |
| G2583_4013 | CDS  | 4063780 | 4064769 | -                | rpoA              | DNA-directed RNA polymerase subunit alpha                       |
| G2583_4014 | CDS  | 4064795 | 4065415 | -                | rpsD              | 30S ribosomal protein S4                                        |
| G2583_4015 | CDS  | 4065449 | 4065838 | -                | rpsK              | 30S ribosomal protein S11                                       |
| G2583_4016 | CDS  | 4065855 | 4066211 | -                | rpsM              | 30S ribosomal protein S13                                       |
| G2583_4017 | CDS  | 4066358 | 4066474 | -                | rpmJ              | ribosomal protein L36                                           |
| G2583_4018 | CDS  | 4066506 | 4067837 | -                | secY              | Preprotein translocase subunit secY                             |
| G2583_4019 | CDS  | 4067845 | 4068279 | -                | rplO              | 50S ribosomal protein L15                                       |
| G2583_4020 | CDS  | 4068283 | 4068462 | -                | rpmD              | 50S ribosomal protein L30                                       |
| G2583_4021 | CDS  | 4068466 | 4068969 | -                | rpsE              | 30S ribosomal protein S5                                        |
| G2583_4022 | CDS  | 4068984 | 4069337 | -                | rplR              | 50S ribosomal protein L18                                       |
| G2583_4023 | CDS  | 4069347 | 4069880 | -                | rplF              | 50S ribosomal protein L6                                        |
| G2583_4024 | CDS  | 4069893 | 4070285 | -                | rpsH              | 30S ribosomal protein S8                                        |
| G2583_4025 | CDS  | 4070319 | 4070624 | -                | rpsN              | 30S ribosomal protein S14                                       |
| G2583_4026 | CDS  | 4070639 | 4071178 | -                | rplE              | 50S ribosomal protein L5                                        |
| G2583_4027 | CDS  | 4071193 | 4071507 | -                | rplX              | 50S ribosomal protein L24                                       |
| G2583_4028 | CDS  | 4071518 | 4071889 | -                | rplN              | 50S ribosomal protein L14                                       |
| G2583_4029 | CDS  | 4072054 | 4072308 | -                | rpsQ              | 30S ribosomal protein S17                                       |
| G2583_4030 | CDS  | 4072308 | 4072499 | -                | rpmC              | 50S ribosomal protein L29                                       |
| G2583_4031 | CDS  | 4072499 | 4072909 | -                | rplP              | 50S ribosomal protein L16                                       |
| G2583_4032 | CDS  | 4072922 | 4073623 | -                | rpsC              | 30S ribosomal protein S3                                        |
| G2583_4033 | CDS  | 4073641 | 4073973 | -                | rplV              | 50S ribosomal protein L22                                       |
| G2583_4034 | CDS  | 4073988 | 4074266 | -                | rpsS              | 30S ribosomal protein S19                                       |
| G2583_4035 | CDS  | 4074283 | 4075104 | -                | rplB              | 50S ribosomal protein L2                                        |
| G2583_4036 | CDS  | 4075122 | 4075424 | -                | rplW              | 50S ribosomal protein L23                                       |
| G2583_4037 | CDS  | 4075421 | 4076026 | -                | rplD              | 50S ribosomal protein L4                                        |
| G2583_4038 | CDS  | 4076037 | 4076666 | -                | rplC              | 50S ribosomal protein L3                                        |
| G2583_4039 | CDS  | 4076699 | 4077010 | -                | rpsJ              | Ribosomal protein S10                                           |
| G2583_4040 | CDS  | 4077155 | 4077340 | +                | -                 | hypothetical protein                                            |
| G2583_4041 | CDS  | 4077389 | 4077856 | +                | gspO              | Peptidase, A24 (Type IV prepilin peptidase) family              |
| G2583_4042 | CDS  | 4077853 | 4078329 | -                | bfr               | Bacterioferritin                                                |
| G2583_4043 | CDS  | 4078402 | 4078596 | -                | bfd               | Bacterioferritin-associated ferredoxin                          |
| G2583_4044 | CDS  | 4078779 | 4079963 | -                | tufA              | Elongation factor Tu 1                                          |
| G2583_4045 | CDS  | 4080034 | 4082148 | -                | fusA              | Elongation factor G                                             |
| G2583_4046 | CDS  | 4082245 | 4082715 | -                | rpsG              | 30S ribosomal protein S7                                        |
| G2583_4047 | CDS  | 4082812 | 4083186 | -                | rpsL              | Ribosomal protein S12                                           |
| G2583_4048 | CDS  | 4083312 | 4083599 | -                | yheL              | sulfur relay protein TusD/DsrH                                  |
| G2583_4049 | CDS  | 4083607 | 4083966 | -                | yheM              | hypothetical protein                                            |
| G2583_4050 | CDS  | 4083966 | 4084352 | -                | yheN              | Sulfurtransferase tusD                                          |
| G2583_4051 | CDS  | 4084352 | 4085086 | -                | yheO              | hypothetical protein                                            |
| G2583_4052 | CDS  | 4085241 | 4086053 | -                | fkpA              | FKBP-type peptidyl-prolyl cis-trans isomerase fkpA precursor    |
| G2583_4053 | CDS  | 4086274 | 4086492 | +                | slyX              | slyX protein                                                    |
| G2583_4054 | CDS  | 4086541 | 4087131 | -                | slyD              | FKBP-type peptidyl-prolyl cis-trans isomerase SlyD              |
| G2583_4055 | CDS  | 4087226 | 4087426 | -                | yheV              | hypothetical protein                                            |
| G2583_4056 | CDS  | 4087436 | 4089241 | -                | kefB              | Glutathione-regulated potassium-efflux system protein kefB      |
| G2583_4057 | CDS  | 4089241 | 4089795 | -                | kefG              | Glutathione-regulated potassium-efflux system ancillary protein |
| G2583_4058 | CDS  | 4089923 | 4091836 | +                | yheS              | Uncharacterized ABC transporter ATP-binding protein yheS        |
| G2583_4059 | CDS  | 4091836 | 4092858 | +                | yheT              | Hydrolase, alpha/beta fold family                               |
| G2583_4060 | CDS  | 4092852 | 4093070 | +                | yheU              | UPF0270 protein yheU                                            |
| G2583_4061 | CDS  | 4093124 | 4093993 | +                | prkB              | Phosphoribulokinase/uridine kinase family protein               |
| G2583_4062 | CDS  | 4094048 | 4094452 | -                | yhfA              | Protein yhfA                                                    |
| G2583_4063 | CDS  | 4094754 | 4095386 | +                | crp               | Catabolite gene activator                                       |
| G2583_4064 | CDS  | 4095425 | 4097527 | +                | yhfK              | integral membrane protein, YccS/YhfK family                     |
| G2583_4065 | CDS  | 4097594 | 4098814 | -                | argD              | Acetylornithine/succinyldiaminopimelate aminotransferase        |
| G2583_4066 | CDS  | 4098900 | 4099463 | -                | pabA              | Aminodeoxychorismate synthase, component II                     |
| G2583_4067 | CDS  | 4099495 | 4100097 | -                | fic               | Cell filamentation protein Fic                                  |
| G2583_4068 | CDS  | 4100087 | 4100254 | -                | yhfG              | hypothetical protein                                            |
| G2583_4069 | CDS  | 4100359 | 4100931 | -                | ppiA              | Peptidyl-prolyl cis-trans isomerase                             |
| G2583_4070 | CDS  | 4101202 | 4102383 | +                | tsgA              | hypothetical protein                                            |
| G2583_4071 | CDS  | 4102645 | 4105188 | +                | nirB              | Nitrite reductase [NAD(P)H], large subunit                      |

| Locus_tag  | Type       | Start   | End     | +/- <sup>a</sup> | Gene <sup>b</sup> | Product                                              |
|------------|------------|---------|---------|------------------|-------------------|------------------------------------------------------|
| G2583_4072 | CDS        | 4105185 | 4105511 | +                | nirD              | Nitrite reductase [NAD(P)H] large subunit            |
| G2583_4073 | CDS        | 4105637 | 4106443 | +                | nirC              | Response regulator receiver protein                  |
| G2583_4074 | CDS        | 4106462 | 4107835 | +                | cysG              | Siroheme synthase [Includes: Uroporphyrinogen-III C- |
| G2583_4075 | CDS        | 4108090 | 4108257 | +                | yhfL              | putative lipoprotein                                 |
| G2583_4076 | CDS        | 4108502 | 4109890 | +                | friA              | Amino acid transporters                              |
| G2583_4077 | CDS        | 4109890 | 4110933 | +                | friB              | SIS family protein                                   |
| G2583_4078 | CDS        | 4110984 | 4111811 | +                | friC              | predicted isomerase                                  |
| G2583_4079 | pseudogene | 4111811 | 4112596 | +                | -                 | hypothetical protein                                 |
| G2583_4080 | CDS        | 4112630 | 4113427 | +                | friR              | GntR-family transcriptional regulator FriR           |
| G2583_4081 | CDS        | 4113558 | 4114562 | -                | trpS              | Tryptophanyl-tRNA synthetase                         |
| G2583_4082 | CDS        | 4114555 | 4115313 | -                | gph               | Phosphoglycolate phosphatase                         |
| G2583_4083 | CDS        | 4115306 | 4115983 | -                | rpe               | Ribulose-phosphate 3-epimerase                       |
| G2583_4084 | CDS        | 4116001 | 4116837 | -                | dam               | DNA adenine methylase                                |
| G2583_4085 | CDS        | 4116944 | 4118230 | -                | damX              | Uncharacterized protein conserved in bacteria        |
| G2583_4086 | CDS        | 4118322 | 4119410 | -                | aroB              | 3-dehydroquinate synthase                            |
| G2583_4087 | CDS        | 4119467 | 4120144 | -                | aroK              | Shikimate kinase                                     |
| G2583_4088 | CDS        | 4120389 | 4121627 | -                | hofQ              | predicted fimbrial transporter                       |
| G2583_4089 | CDS        | 4121539 | 4122264 | -                | hofP              | hypothetical protein                                 |
| G2583_4090 | CDS        | 4122248 | 4122787 | -                | hofN              | PilN family protein                                  |
| G2583_4091 | CDS        | 4122787 | 4123593 | -                | hofM              | hypothetical protein                                 |
| G2583_4092 | CDS        | 4123662 | 4126238 | +                | mrcA              | Penicillin-binding protein 1A                        |
| G2583_4093 | CDS        | 4126403 | 4126963 | -                | nudE              | ADP compounds hydrolase NudE                         |
| G2583_4094 | CDS        | 4127283 | 4129418 | +                | yrfF              | hypothetical protein                                 |
| G2583_4095 | CDS        | 4129438 | 4130151 | +                | yrfG              | Putative phosphatase                                 |
| G2583_4096 | CDS        | 4130162 | 4130563 | +                | hslR              | Heat shock protein 15                                |
| G2583_4097 | CDS        | 4130582 | 4131466 | +                | hslO              | Disulfide bond chaperones of the HSP33 family        |
| G2583_4098 | CDS        | 4131529 | 4133253 | -                | yhgE              | putative transport                                   |
| G2583_4099 | CDS        | 4133329 | 4133460 | -                | -                 | hypothetical protein                                 |
| G2583_4100 | CDS        | 4133632 | 4135254 | +                | pck               | Phosphoenolpyruvate carboxykinase [ATP]              |
| G2583_4101 | CDS        | 4135330 | 4136682 | -                | envZ              | Osmolarity sensor protein envZ                       |
| G2583_4102 | CDS        | 4136679 | 4137398 | -                | ompR              | hypothetical protein                                 |
| G2583_4103 | CDS        | 4137626 | 4138102 | +                | greB              | Transcription elongation factor greB                 |
| G2583_4104 | CDS        | 4138199 | 4140520 | +                | yhgF              | protein yhgF                                         |
| G2583_4105 | CDS        | 4140958 | 4141185 | +                | feoA              | Ferrous iron transport protein A                     |
| G2583_4106 | CDS        | 4141202 | 4143523 | +                | feoB              | Ferrous iron transport protein B                     |
| G2583_4107 | CDS        | 4143523 | 4143759 | +                | feoC              | conserved hypothetical protein                       |
| G2583_4108 | CDS        | 4143962 | 4144840 | +                | yhgA              | hypothetical protein                                 |
| G2583_4109 | CDS        | 4144867 | 4145637 | -                | bioH              | Carboxylesterase bioH                                |
| G2583_4110 | CDS        | 4145675 | 4146358 | +                | gntX              | gluconate periplasmic binding protein                |
| G2583_4111 | CDS        | 4146417 | 4146992 | +                | gntY              | Fe/S biogenesis protein nfuA                         |
| G2583_4112 | CDS        | 4147353 | 4148669 | +                | gntT              | High-affinity gluconate transporter                  |
| G2583_4113 | CDS        | 4148714 | 4150798 | -                | malQ              | 4-alpha-gluconotransferase                           |
| G2583_4114 | CDS        | 4150808 | 4153201 | -                | malP              | Maltodextrin phosphorylase                           |
| G2583_4115 | CDS        | 4153813 | 4156518 | +                | malT              | transcriptional regulator MalT                       |
| G2583_4116 | CDS        | 4156515 | 4156643 | +                | -                 | hypothetical protein                                 |
| G2583_4117 | CDS        | 4156579 | 4156863 | +                | -                 | hypothetical protein                                 |
| G2583_4118 | CDS        | 4156854 | 4157339 | +                | -                 | Acetyltransferase, gnat family                       |
| G2583_4119 | CDS        | 4157389 | 4158420 | -                | rtcA              | RNA 3'-terminal phosphate cyclase                    |
| G2583_4120 | CDS        | 4158421 | 4159647 | -                | rtcB              | RtcB protein                                         |
| G2583_4121 | CDS        | 4159835 | 4161433 | +                | rtcR              | Sigma-54 dependent transcriptional regulator RtcR    |
| G2583_4122 | CDS        | 4161415 | 4162173 | -                | glpR              | Glycerol-3-phosphate regulon repressor               |
| G2583_4123 | CDS        | 4162190 | 4163020 | -                | glpG              | Rhomboid protease glpG                               |
| G2583_4124 | CDS        | 4163065 | 4163391 | -                | glpE              | Thiosulfate sulfurtransferase glpE                   |
| G2583_4125 | CDS        | 4163581 | 4165086 | +                | glpD              | Glycerol-3-phosphate dehydrogenase                   |
| G2583_4126 | CDS        | 4165301 | 4165903 | -                | -                 | hypothetical protein                                 |
| G2583_4127 | CDS        | 4165903 | 4166895 | -                | -                 | hypothetical protein                                 |
| G2583_4128 | CDS        | 4166921 | 4168438 | -                | yzgL              | Hypothetical membrane protein                        |
| G2583_4129 | CDS        | 4168555 | 4171002 | -                | glgP              | Glycogen phosphorylase                               |
| G2583_4130 | CDS        | 4171021 | 4172454 | -                | glgA              | Glycogen synthase                                    |
| G2583_4131 | CDS        | 4172454 | 4173749 | -                | glgC              | Glucose-1-phosphate adenylyltransferase              |

| Locus_tag  | Type       | Start   | End     | +/- <sup>a</sup> | Gene <sup>b</sup> | Product                                                         |
|------------|------------|---------|---------|------------------|-------------------|-----------------------------------------------------------------|
| G2583_4132 | CDS        | 4173767 | 4175740 | -                | glgX              | Glycogen debranching enzyme                                     |
| G2583_4133 | CDS        | 4175737 | 4177923 | -                | glgB              | 1,4-alpha-glucan-branching enzyme                               |
| G2583_4134 | CDS        | 4178196 | 4179299 | -                | asd               | Aspartate-semialdehyde dehydrogenase                            |
| G2583_4135 | CDS        | 4179491 | 4180084 | +                | yhgN              | UPF0056 inner membrane protein yhgN                             |
| G2583_4136 | CDS        | 4180130 | 4181425 | -                | -                 | Putative DNA processing protein                                 |
| G2583_4137 | pseudogene | 4181332 | 4183427 | -                | -                 | putative ATP-dependent DNA helicase                             |
| G2583_4138 | CDS        | 4183567 | 4184907 | -                | gntU              | H <sup>+</sup> /gluconate symporter and related permeases       |
| G2583_4139 | CDS        | 4184911 | 4185438 | -                | gntK              | Thermoresistant gluconokinase                                   |
| G2583_4140 | CDS        | 4185577 | 4186572 | -                | gntR              | regulator of gluconate operon                                   |
| G2583_4141 | CDS        | 4186796 | 4187491 | -                | yhhW              | hypothetical protein                                            |
| G2583_4142 | CDS        | 4187614 | 4188651 | -                | yhhX              | Oxidoreductase, NAD-binding                                     |
| G2583_4143 | ncRNA      | 4188770 | 4188852 | -                | -                 | ncRNA                                                           |
| G2583_4144 | CDS        | 4188986 | 4189474 | +                | yhhY              | Acetyltransferase, GNAT family                                  |
| G2583_4145 | CDS        | 4189685 | 4190533 | +                | -                 | hypothetical protein                                            |
| G2583_4146 | CDS        | 4190546 | 4190962 | -                | -                 | hypothetical protein                                            |
| G2583_4147 | CDS        | 4191331 | 4193076 | -                | ggt               | Gamma-glutamyltranspeptidase                                    |
| G2583_4148 | CDS        | 4193196 | 4193636 | +                | yhhA              | hypothetical protein                                            |
| G2583_4149 | CDS        | 4193623 | 4194366 | -                | ugpQ              | Glycerophosphodiester phosphodiesterase, cytosolic              |
| G2583_4150 | CDS        | 4194363 | 4195433 | -                | ugpC              | sn-glycerol-3-phosphate import ATP-binding protein ugpC         |
| G2583_4151 | CDS        | 4195435 | 4196280 | -                | ugpE              | sn-glycerol-3-phosphate transport system permease protein       |
| G2583_4152 | CDS        | 4196277 | 4197164 | -                | ugpA              | sn-glycerol-3-phosphate transport system permease protein       |
| G2583_4153 | CDS        | 4197262 | 4198578 | -                | ugpB              | sn-glycerol-3-phosphate-binding periplasmic protein ugpB        |
| G2583_4154 | CDS        | 4198938 | 4199684 | -                | -                 | hypothetical protein                                            |
| G2583_4155 | CDS        | 4199803 | 4200516 | -                | livF              | ATP-binding component of leucine transport                      |
| G2583_4156 | CDS        | 4200518 | 4201285 | -                | livG              | High-affinity branched-chain amino acid transport ATP-binding   |
| G2583_4157 | CDS        | 4201282 | 4202559 | -                | livM              | High-affinity branched-chain amino acid ABC transporter,        |
| G2583_4158 | CDS        | 4202556 | 4203482 | -                | livH              | High-affinity branched-chain amino acid transport system        |
| G2583_4159 | CDS        | 4203530 | 4204693 | -                | livK              | High-affinity branched-chain amino acid ABC transporter,        |
| G2583_4160 | CDS        | 4205063 | 4205446 | +                | yhhK              | Acetyltransferase, GNAT family                                  |
| G2583_4161 | CDS        | 4205443 | 4205970 | -                | -                 | hypothetical protein                                            |
| G2583_4162 | CDS        | 4205977 | 4206243 | -                | -                 | hypothetical protein                                            |
| G2583_4163 | CDS        | 4206393 | 4207553 | -                | livJ              | High-affinity amino acid transport protein, periplasmic binding |
| G2583_4164 | CDS        | 4207767 | 4208621 | -                | rpoH              | RNA polymerase sigma factor                                     |
| G2583_4165 | CDS        | 4208866 | 4209924 | -                | ftsX              | Cell division protein ftsX                                      |
| G2583_4166 | CDS        | 4209917 | 4210585 | -                | ftsE              | Cell division ATP-binding protein ftsE                          |
| G2583_4167 | CDS        | 4210588 | 4212084 | -                | ftsY              | Cell division protein FtsY                                      |
| G2583_4168 | CDS        | 4212234 | 4212830 | +                | rsmD              | 16S rRNA methyltransferase RsmD                                 |
| G2583_4169 | CDS        | 4212820 | 4213089 | +                | yhhL              | hypothetical protein                                            |
| G2583_4170 | CDS        | 4213092 | 4213451 | -                | yhhM              | putative receptor                                               |
| G2583_4171 | CDS        | 4213592 | 4214218 | +                | yhhN              | Uncharacterized membrane protein yhhN                           |
| G2583_4172 | CDS        | 4214292 | 4216490 | +                | zntA              | Cadmium-translocating P-type ATPase                             |
| G2583_4173 | CDS        | 4216592 | 4216837 | -                | sirA              | Sulfurtransferase tusA                                          |
| G2583_4174 | CDS        | 4217058 | 4217723 | +                | yhhQ              | hypothetical protein                                            |
| G2583_4175 | CDS        | 4217796 | 4218353 | +                | dcrB              | hypothetical protein                                            |
| G2583_4176 | CDS        | 4218357 | 4219607 | -                | yhhS              | Transporter, major facilitator family                           |
| G2583_4177 | CDS        | 4219661 | 4220755 | +                | yhhT              | hypothetical protein                                            |
| G2583_4178 | CDS        | 4221135 | 4221524 | +                | -                 | hypothetical protein                                            |
| G2583_4179 | CDS        | 4221593 | 4222651 | +                | -                 | O-methyltransferase, family 2                                   |
| G2583_4180 | CDS        | 4222692 | 4223414 | +                | -                 | Beta-ketoacyl synthase domain protein                           |
| G2583_4181 | CDS        | 4223411 | 4224232 | +                | -                 | Putative phospholipid biosynthesis acyltransferase              |
| G2583_4182 | CDS        | 4224207 | 4224464 | +                | -                 | Acyl carrier protein                                            |
| G2583_4183 | CDS        | 4224476 | 4224727 | +                | acyl              | acyl carrier protein                                            |
| G2583_4184 | CDS        | 4224732 | 4225313 | +                | -                 | DNA gyrase subunit B                                            |
| G2583_4185 | CDS        | 4225310 | 4226671 | +                | -                 | Putative surfactin synthetase                                   |
| G2583_4186 | CDS        | 4226658 | 4227011 | +                | -                 | hypothetical protein                                            |
| G2583_4187 | CDS        | 4227002 | 4228678 | +                | -                 | Glycosyl transferase, family 2                                  |
| G2583_4188 | CDS        | 4228682 | 4229104 | +                | -                 | Thioesterase superfamily protein                                |
| G2583_4189 | CDS        | 4229101 | 4229706 | +                | -                 | Outer membrane lipoprotein carrier protein LolA                 |
| G2583_4190 | CDS        | 4229675 | 4231993 | +                | -                 | hypothetical protein                                            |
| G2583_4191 | CDS        | 4231990 | 4232574 | +                | -                 | hypothetical protein                                            |

| Locus_tag  | Type  | Start   | End     | +/- <sup>a</sup> | Gene <sup>b</sup> | Product                                                         |
|------------|-------|---------|---------|------------------|-------------------|-----------------------------------------------------------------|
| G2583_4192 | CDS   | 4232576 | 4233745 | +                | -                 | 3-oxoacyl-(acyl carrier protein) synthase I                     |
| G2583_4193 | CDS   | 4233742 | 4234206 | +                | -                 | FabA-like domain protein                                        |
| G2583_4194 | CDS   | 4234206 | 4234937 | +                | -                 | Putative 3-oxoacyl-(Acyl-carrier-protein) reductase             |
| G2583_4195 | CDS   | 4234934 | 4236163 | +                | -                 | Beta-ketoacyl synthase                                          |
| G2583_4196 | CDS   | 4236165 | 4236752 | +                | acpT              | 4'-phosphopantetheinyl transferase acpT                         |
| G2583_4197 | CDS   | 4236863 | 4238437 | +                | nikA              | Nickel ABC transporter, periplasmic nickel-binding protein NikA |
| G2583_4198 | CDS   | 4238437 | 4239381 | +                | nikB              | Nickel transport system permease protein nikB                   |
| G2583_4199 | CDS   | 4239378 | 4240211 | +                | nikC              | Nickel transport system permease protein nikC                   |
| G2583_4200 | CDS   | 4240211 | 4240975 | +                | nikD              | Nickel import ATP-binding protein nikD                          |
| G2583_4201 | CDS   | 4240972 | 4241778 | +                | nikE              | Nickel import ATP-binding protein nikE                          |
| G2583_4202 | CDS   | 4241784 | 4242185 | +                | nikR              | Nickel-responsive regulator                                     |
| G2583_4203 | CDS   | 4242375 | 4243130 | +                | -                 | putative regulator                                              |
| G2583_4204 | CDS   | 4243155 | 4243628 | +                | -                 | PEP-dependent sugar transporting PTS family, IIA component      |
| G2583_4205 | CDS   | 4243625 | 4243906 | +                | -                 | PEP-dependent sugar transporting PTS family, IIB component      |
| G2583_4206 | CDS   | 4243953 | 4245341 | +                | -                 | PEP-dependent sugar transporting PTS family, IIC component      |
| G2583_4207 | CDS   | 4245334 | 4246842 | +                | -                 | Carbohydrate kinase, FGGY family                                |
| G2583_4208 | CDS   | 4246832 | 4247101 | +                | -                 | Phosphocarrier, HPr family                                      |
| G2583_4209 | CDS   | 4247133 | 4247993 | +                | gatY              | Fructose-bisphosphate aldolase, class II                        |
| G2583_4210 | CDS   | 4248043 | 4248402 | -                | hicB              | HicB family protein                                             |
| G2583_4211 | CDS   | 4248399 | 4248674 | -                | HicA              | HicA-like protein                                               |
| G2583_4212 | CDS   | 4248747 | 4249874 | -                | yhhJ              | hypothetical protein                                            |
| G2583_4213 | CDS   | 4249871 | 4252606 | -                | rbbA              | ABC transporter, ATP binding protein                            |
| G2583_4214 | CDS   | 4252603 | 4253670 | -                | yhiL              | Auxiliary transport protein, membrane fusion protein (MFP)      |
| G2583_4215 | CDS   | 4254036 | 4255658 | -                | yhiJ              | hypothetical protein                                            |
| G2583_4216 | CDS   | 4255920 | 4257593 | -                | yhiL              | hypothetical protein                                            |
| G2583_4217 | CDS   | 4257815 | 4258966 | +                | yhiM              | Inner membrane protein yhiM                                     |
| G2583_4218 | CDS   | 4259284 | 4260486 | -                | yhiN              | Pyridine nucleotide-disulfide oxidoreductase family protein     |
| G2583_4219 | CDS   | 4260718 | 4262217 | +                | pitA              | Low-affinity inorganic phosphate transporter 1                  |
| G2583_4220 | CDS   | 4262288 | 4262623 | -                | uspB              | Universal stress protein B                                      |
| G2583_4221 | CDS   | 4263014 | 4263448 | +                | uspA              | Universal stress protein A                                      |
| G2583_4222 | CDS   | 4263765 | 4265234 | +                | yhiP              | Hypothetical transporter YhiP                                   |
| G2583_4223 | CDS   | 4265283 | 4266035 | -                | yhiQ              | UPF0341 protein yhiQ                                            |
| G2583_4224 | CDS   | 4266043 | 4268085 | -                | prlC              | Oligopeptidase A                                                |
| G2583_4225 | CDS   | 4268288 | 4269130 | +                | yhiR              | DNA utilization protein YhiR                                    |
| G2583_4226 | CDS   | 4269202 | 4270554 | +                | gor               | Glutathione-disulfide reductase                                 |
| G2583_4227 | CDS   | 4271435 | 4271788 | +                | arsR              | Arsenical resistance operon repressor                           |
| G2583_4228 | CDS   | 4271842 | 4273131 | +                | arsB              | Arsenical pump membrane protein                                 |
| G2583_4229 | CDS   | 4273144 | 4273569 | +                | arsC              | Arsenate reductase                                              |
| G2583_4230 | CDS   | 4273681 | 4273788 | +                | -                 | hypothetical protein                                            |
| G2583_4231 | CDS   | 4274196 | 4275419 | +                | yhiS              | hypothetical protein                                            |
| G2583_4232 | CDS   | 4275633 | 4276232 | +                | slp               | Outer membrane lipoprotein, Slp family                          |
| G2583_4233 | CDS   | 4276388 | 4276918 | +                | dctR              | hypothetical protein                                            |
| G2583_4234 | CDS   | 4276979 | 4278007 | -                | chuS              | Hemin transport protein HmuS                                    |
| G2583_4235 | CDS   | 4278056 | 4280038 | -                | chuA              | Outer membrane heme/hemoglobin receptor ChuA                    |
| G2583_4236 | CDS   | 4280314 | 4280598 | -                | -                 | hypothetical protein                                            |
| G2583_4237 | CDS   | 4280721 | 4281635 | +                | chuT              | Putative periplasmic binding protein                            |
| G2583_4238 | CDS   | 4281655 | 4282992 | +                | chuW              | Putative coproporphyrinogen III oxidase                         |
| G2583_4239 | CDS   | 4283005 | 4283499 | +                | chuX              | hypothetical protein                                            |
| G2583_4240 | CDS   | 4283499 | 4284122 | +                | chuY              | hypothetical protein                                            |
| G2583_4241 | CDS   | 4284171 | 4285163 | +                | chuU              | Putative permease of iron compound ABC transport system         |
| G2583_4242 | CDS   | 4285160 | 4285930 | +                | shuV              | Hemin import ATP-binding protein hmuV                           |
| G2583_4243 | CDS   | 4285982 | 4286641 | -                | yhiD              | putative Mg <sup>2+</sup> transporter-C (MgtC) family protein   |
| G2583_4244 | CDS   | 4286693 | 4287031 | -                | hdeB              | acid-resistance protein                                         |
| G2583_4245 | CDS   | 4287135 | 4287467 | -                | hdeA              | Chaperone-like protein hdeA precursor                           |
| G2583_4246 | CDS   | 4287722 | 4288294 | +                | hdeD              | acid-resistance membrane protein                                |
| G2583_4247 | CDS   | 4289093 | 4289620 | +                | gadE              | hypothetical protein                                            |
| G2583_4248 | CDS   | 4289959 | 4291116 | +                | mdtE              | Multidrug resistance protein mdtE precursor                     |
| G2583_4249 | CDS   | 4291141 | 4294254 | +                | mdtF              | Multidrug resistance protein mdtF                               |
| G2583_4250 | CDS   | 4294617 | 4295345 | -                | gadW              | putative ARAC-type regulatory protein                           |
| G2583_4251 | ncRNA | 4295588 | 4295701 | +                | -                 | ncRNA                                                           |

| Locus_tag  | Type | Start   | End     | +/- <sup>a</sup> | Gene <sup>b</sup> | Product                                                  |
|------------|------|---------|---------|------------------|-------------------|----------------------------------------------------------|
| G2583_4252 | CDS  | 4295713 | 4296537 | -                | gadX              | DNA-binding transcriptional dual regulator               |
| G2583_4253 | CDS  | 4296908 | 4298308 | -                | gadA              | Glutamate decarboxylase alpha                            |
| G2583_4254 | CDS  | 4298519 | 4299916 | -                | yhjA              | Di-haem cytochrome c peroxidase family protein           |
| G2583_4255 | CDS  | 4300321 | 4301970 | +                | treF              | Cytoplasmic trehalase                                    |
| G2583_4256 | CDS  | 4302021 | 4302623 | -                | yhjB              | Putative HTH-type transcriptional regulator yhjB         |
| G2583_4257 | CDS  | 4303071 | 4304042 | +                | yhjC              | putative transcriptional regulator LYSR-type             |
| G2583_4258 | CDS  | 4304091 | 4305104 | +                | yhjD              | Putative ribonuclease                                    |
| G2583_4259 | CDS  | 4305516 | 4306838 | +                | yhjE              | Inner membrane metabolite transport protein yhjE         |
| G2583_4260 | CDS  | 4307020 | 4309095 | -                | yhjG              | hypothetical protein                                     |
| G2583_4261 | CDS  | 4309150 | 4309920 | -                | yhjH              | Cyclic diguanylate phosphodiesterase                     |
| G2583_4262 | CDS  | 4310149 | 4311078 | +                | kdgK              | Ketodeoxygluconokinase                                   |
| G2583_4263 | CDS  | 4311174 | 4312670 | -                | yhjJ              | Predicted Zn-dependent peptidases                        |
| G2583_4264 | CDS  | 4312891 | 4314177 | -                | dctA              | C4-dicarboxylate transport protein                       |
| G2583_4265 | CDS  | 4314360 | 4316348 | -                | yhjK              | Putative diguanylate cyclase                             |
| G2583_4266 | CDS  | 4316430 | 4319903 | -                | bcsC              | Cellulose synthase operon protein C                      |
| G2583_4267 | CDS  | 4319885 | 4320991 | -                | bcsZ              | Endoglucanase precursor                                  |
| G2583_4268 | CDS  | 4320998 | 4323337 | -                | bcsB              | Cyclic di-GMP binding protein                            |
| G2583_4269 | CDS  | 4323348 | 4325966 | -                | bcsA              | Cellulose synthase catalytic subunit [UDP-forming]       |
| G2583_4270 | CDS  | 4325963 | 4326715 | -                | yhjQ              | ATPases involved in chromosome partitioning              |
| G2583_4271 | CDS  | 4326727 | 4326915 | -                | yhjR              | hypothetical protein                                     |
| G2583_4272 | CDS  | 4327188 | 4328759 | +                | bcsE              | Putative protease                                        |
| G2583_4273 | CDS  | 4328756 | 4328947 | +                | bcsF              | hypothetical protein                                     |
| G2583_4274 | CDS  | 4328944 | 4330623 | +                | bcsG              | hypothetical protein                                     |
| G2583_4275 | CDS  | 4330710 | 4330952 | -                | ldrD              | hypothetical protein                                     |
| G2583_4276 | CDS  | 4331293 | 4332564 | +                | yhjV              | Serine transporter family protein                        |
| G2583_4277 | CDS  | 4332594 | 4333598 | -                | dppF              | ABC-type oligopeptide transport system, ATPase component |
| G2583_4278 | CDS  | 4333595 | 4334578 | -                | dppD              | Dipeptide transport ATP-binding protein dppD             |
| G2583_4279 | CDS  | 4334589 | 4335491 | -                | dppC              | Dipeptide transport system permease protein dppC         |
| G2583_4280 | CDS  | 4335501 | 4336520 | -                | dppB              | Dipeptide transport system permease protein dppB         |
| G2583_4281 | CDS  | 4336671 | 4338278 | -                | dppA              | Dipeptide ABC transporter, periplasmic dipeptide-binding |
| G2583_4282 | tRNA | 4339022 | 4339100 | -                | -                 | Pro tRNA                                                 |
| G2583_4283 | CDS  | 4339191 | 4340882 | -                | eptB              | hypothetical protein                                     |
| G2583_4284 | CDS  | 4341137 | 4341667 | -                | lpfE              | putative fimbrial subunit                                |
| G2583_4285 | CDS  | 4341672 | 4342727 | -                | lpfD              | putative fimbrial protein                                |
| G2583_4286 | CDS  | 4342742 | 4345315 | -                | fimD              | PapC-like porin protein involved in fimbrial biogenesis  |
| G2583_4287 | CDS  | 4345344 | 4346042 | -                | lpfB              | Putative fimbrial chaperone                              |
| G2583_4288 | CDS  | 4346095 | 4346631 | -                | lpfA              | Putative major fimbrial subunit                          |
| G2583_4289 | CDS  | 4346963 | 4348165 | -                | yhjX              | Inner membrane protein YhjX                              |
| G2583_4290 | CDS  | 4348394 | 4349098 | -                | yhjY              | Putative lipase                                          |
| G2583_4291 | CDS  | 4349250 | 4349813 | +                | tag               | 3-methyladenine DNA glycosylase I                        |
| G2583_4292 | CDS  | 4349810 | 4350250 | +                | yiaC              | Acetyltransferase, GNAT family                           |
| G2583_4293 | CDS  | 4350219 | 4352552 | -                | bisC              | Biotin sulfoxide reductase                               |
| G2583_4294 | CDS  | 4352705 | 4353364 | +                | yiaD              | Inner membrane lipoprotein yiaD precursor                |
| G2583_4295 | CDS  | 4353468 | 4354442 | +                | ghrB              | 2-ketogluconate reductase                                |
| G2583_4296 | CDS  | 4354492 | 4355322 | -                | yiaF              | hypothetical protein                                     |
| G2583_4297 | CDS  | 4355636 | 4355926 | +                | yiaG              | putative transcriptional regulator                       |
| G2583_4298 | CDS  | 4356207 | 4356419 | +                | cspA              | Cold shock protein cspA                                  |
| G2583_4299 | CDS  | 4356607 | 4356819 | -                | hokA              | small toxic polypeptide                                  |
| G2583_4300 | CDS  | 4357082 | 4359151 | -                | glyS              | Glycyl-tRNA synthetase beta subunit                      |
| G2583_4301 | CDS  | 4359161 | 4360072 | -                | glyQ              | Glycyl-tRNA synthetase alpha subunit                     |
| G2583_4302 | CDS  | 4360167 | 4360466 | -                | ysaB              | Uncharacterized lipoprotein ysaB precursor               |
| G2583_4303 | CDS  | 4360641 | 4361636 | +                | wecH              | Acyltransferase family protein                           |
| G2583_4304 | CDS  | 4361678 | 4362118 | -                | yiaA              | Inner membrane protein yiaA                              |
| G2583_4305 | CDS  | 4362161 | 4362514 | -                | yiaB              | hypothetical protein                                     |
| G2583_4306 | CDS  | 4362671 | 4364125 | -                | xylB              | Xylulokinase                                             |
| G2583_4307 | CDS  | 4364197 | 4365519 | -                | xylA              | Xylose isomerase                                         |
| G2583_4308 | CDS  | 4365885 | 4366877 | +                | xylF              | Xylose binding protein transport system                  |
| G2583_4309 | CDS  | 4366955 | 4368496 | +                | xylG              | Xylose import ATP-binding protein xylG                   |
| G2583_4310 | CDS  | 4368474 | 4369655 | +                | xylH              | Xylose transport system permease protein xylH            |
| G2583_4311 | CDS  | 4369733 | 4370911 | +                | xylR              | Xylose operon regulatory protein                         |



| Locus_tag  | Type | Start   | End     | +/- <sup>a</sup> | Gene <sup>b</sup> | Product                                                     |
|------------|------|---------|---------|------------------|-------------------|-------------------------------------------------------------|
| G2583_4312 | CDS  | 4371019 | 4371843 | -                | bax               | hypothetical protein                                        |
| G2583_4313 | CDS  | 4372163 | 4374193 | +                | malS              | Alpha-amylase, periplasmic                                  |
| G2583_4314 | CDS  | 4374371 | 4375624 | +                | avtA              | Alanine-alpha-ketoisovalerate (Or valine-pyruvate)          |
| G2583_4315 | CDS  | 4375776 | 4376249 | -                | ysaA              | 4Fe-4S binding domain protein                               |
| G2583_4316 | CDS  | 4376493 | 4377308 | -                | -                 | AraC-type DNA-binding domain-containing proteins            |
| G2583_4317 | CDS  | 4377534 | 4378934 | +                | -                 | Sugar transporter, glycoside-pentoside-hexuronide family    |
| G2583_4318 | CDS  | 4378945 | 4380915 | +                | -                 | hypothetical protein                                        |
| G2583_4319 | CDS  | 4381045 | 4381785 | -                | viaT              | Putative outer membrane protein viaT precursor              |
| G2583_4320 | CDS  | 4381909 | 4382883 | +                | viaU              | Transcriptional regulator                                   |
| G2583_4321 | CDS  | 4382880 | 4384016 | -                | viaV              | Auxiliary transport protein, membrane fusion protein family |
| G2583_4322 | CDS  | 4384022 | 4384345 | -                | viaW              | Inner membrane protein viaW                                 |
| G2583_4323 | CDS  | 4384890 | 4386518 | -                | aldB              | Aldehyde dehydrogenase B                                    |
| G2583_4324 | CDS  | 4386536 | 4387831 | -                | -                 | Fic family protein                                          |
| G2583_4325 | CDS  | 4387961 | 4389112 | -                | viaY              | Alcohol dehydrogenase II                                    |
| G2583_4326 | CDS  | 4389302 | 4391146 | -                | selB              | Selenocysteine-specific translation elongation factor       |
| G2583_4327 | CDS  | 4391143 | 4392534 | -                | selA              | L-seryl-tRNA(Sec) selenium transferase (Selenocysteine      |
| G2583_4328 | CDS  | 4392632 | 4393240 | -                | yibF              | Glutathione S-transferase                                   |
| G2583_4329 | CDS  | 4393469 | 4397746 | +                | rhsA              | rhsA                                                        |
| G2583_4330 | CDS  | 4398528 | 4399052 | +                | yibJ              | Rhs family protein                                          |
| G2583_4331 | CDS  | 4399064 | 4399525 | +                | yibG              | hypothetical protein                                        |
| G2583_4332 | CDS  | 4400232 | 4400669 | +                | yibV              | hypothetical protein                                        |
| G2583_4333 | CDS  | 4401128 | 4402264 | -                | yibH              | Inner membrane protein yibH                                 |
| G2583_4334 | CDS  | 4402267 | 4402629 | -                | yibI              | hypothetical protein                                        |
| G2583_4335 | CDS  | 4403166 | 4405085 | +                | mtlA              | PTS system, mannitol-specific IIBC component                |
| G2583_4336 | CDS  | 4405180 | 4406328 | +                | mtlD              | Mannitol-1-phosphate dehydrogenase                          |
| G2583_4337 | CDS  | 4406328 | 4406915 | +                | mtlR              | Mannitol operon repressor                                   |
| G2583_4338 | CDS  | 4407421 | 4407783 | +                | yibL              | conserved hypothetical protein                              |
| G2583_4339 | CDS  | 4408097 | 4408255 | -                | -                 | hypothetical protein                                        |
| G2583_4340 | CDS  | 4408428 | 4409009 | +                | -                 | putative lipoprotein                                        |
| G2583_4341 | CDS  | 4409053 | 4413819 | +                | -                 | Putative adhesin                                            |
| G2583_4342 | CDS  | 4414187 | 4415842 | +                | lldP              | L-lactate permease                                          |
| G2583_4343 | CDS  | 4415842 | 4416618 | +                | lldR              | Putative L-lactate dehydrogenase operon regulatory protein  |
| G2583_4344 | CDS  | 4416615 | 4417805 | +                | lldD              | L-lactate dehydrogenase [cytochrome]                        |
| G2583_4345 | CDS  | 4417991 | 4418464 | +                | yibK              | RNA methyltransferase, TrmH family, group 2                 |
| G2583_4346 | CDS  | 4418517 | 4419338 | -                | cysE              | Serine acetyltransferase                                    |
| G2583_4347 | CDS  | 4419418 | 4420437 | -                | gpsA              | Glycerol-3-phosphate dehydrogenase [NAD(P)+] (NAD(P)H-      |
| G2583_4348 | CDS  | 4420437 | 4420904 | -                | secB              | Protein-export protein secB                                 |
| G2583_4349 | CDS  | 4420967 | 4421218 | -                | grxC              | Glutaredoxin-3                                              |
| G2583_4350 | CDS  | 4421360 | 4421791 | -                | yibN              | hypothetical protein                                        |
| G2583_4351 | CDS  | 4422036 | 4423580 | +                | gpmM              | Putative 2,3-bisphosphoglycerate-independent                |
| G2583_4352 | CDS  | 4423590 | 4424873 | +                | envC              | hypothetical protein                                        |
| G2583_4353 | CDS  | 4424877 | 4425836 | +                | yibQ              | Uncharacterized protein conserved in bacteria               |
| G2583_4354 | CDS  | 4425842 | 4426858 | -                | yibD              | Putative regulator                                          |
| G2583_4355 | CDS  | 4427097 | 4428122 | -                | tdh               | L-threonine 3-dehydrogenase                                 |
| G2583_4356 | CDS  | 4428132 | 4429328 | -                | kbl               | 2-amino-3-ketobutyrate CoA ligase                           |
| G2583_4357 | CDS  | 4429603 | 4430475 | -                | htrL              | Involved in lipopolysaccharide biosynthesis                 |
| G2583_4358 | CDS  | 4430764 | 4431696 | +                | rfaD              | ADP-L-glycero-D-manno-heptose-6-epimerase                   |
| G2583_4359 | CDS  | 4431706 | 4432752 | +                | rfaF              | Lipopolysaccharide heptosyltransferase II                   |
| G2583_4360 | CDS  | 4432756 | 4433748 | +                | rfaC              | Lipopolysaccharide heptosyltransferase I                    |
| G2583_4361 | CDS  | 4433745 | 4434953 | +                | waaL              | Lipid A-core: surface polymer ligase WaaL                   |
| G2583_4362 | CDS  | 4434990 | 4436132 | -                | waaD              | Lipopolysaccharide 1,2-N-acetylglucosaminetransferase       |
| G2583_4363 | CDS  | 4436141 | 4437154 | -                | rfaJ              | Lipopolysaccharide 1,2-glucosyltransferase                  |
| G2583_4364 | CDS  | 4437179 | 4437886 | -                | rfaY              | lipopolysaccharide core biosynthesis protein                |
| G2583_4365 | CDS  | 4437912 | 4438919 | -                | rfaI              | Lipopolysaccharide 1,3-galactosyltransferase                |
| G2583_4366 | CDS  | 4438962 | 4439768 | -                | rfaP              | Lipopolysaccharide core biosynthesis protein RfaP           |
| G2583_4367 | CDS  | 4439752 | 4440876 | -                | rfaG              | Lipopolysaccharide core biosynthesis protein RfaG           |
| G2583_4368 | CDS  | 4440873 | 4441931 | -                | rfaQ              | Lipopolysaccharide core biosynthesis protein                |
| G2583_4369 | CDS  | 4442344 | 4443621 | +                | waaA              | Kdo transferase WaaA                                        |
| G2583_4370 | CDS  | 4443629 | 4444108 | +                | coaD              | Phosphopantetheine adenylyltransferase                      |
| G2583_4371 | CDS  | 4444147 | 4444956 | -                | mutM              | Formamidopyrimidine-DNA glycosylase (Fapy-DNA               |

| Locus_tag  | Type       | Start   | End     | +/- <sup>a</sup> | Gene <sup>b</sup> | Product                                                     |
|------------|------------|---------|---------|------------------|-------------------|-------------------------------------------------------------|
| G2583_4372 | CDS        | 4445054 | 4445221 | -                | rpmG              | 50S ribosomal protein L33                                   |
| G2583_4373 | CDS        | 4445242 | 4445478 | -                | rpmB              | 50S ribosomal protein L28                                   |
| G2583_4374 | CDS        | 4445695 | 4446369 | -                | yicR              | DNA repair proteins                                         |
| G2583_4375 | CDS        | 4446535 | 4447755 | +                | dfp               | Dfp                                                         |
| G2583_4376 | CDS        | 4447733 | 4448191 | +                | dut               | Deoxyuridine 5'-triphosphate nucleotidohydrolase            |
| G2583_4377 | CDS        | 4448298 | 4448894 | +                | slmA              | HTH-type protein slmA                                       |
| G2583_4378 | CDS        | 4448931 | 4449572 | -                | pyrE              | Orotate phosphoribosyltransferase                           |
| G2583_4379 | CDS        | 4449638 | 4450354 | -                | rph               | Ribonuclease PH                                             |
| G2583_4380 | CDS        | 4450481 | 4451344 | +                | yicC              | Uncharacterized stress-induced protein                      |
| G2583_4381 | CDS        | 4451565 | 4452389 | +                | dinD              | Pyridoxine biosynthesis enzyme                              |
| G2583_4382 | CDS        | 4452627 | 4453298 | +                | yicG              | hypothetical protein                                        |
| G2583_4383 | CDS        | 4453295 | 4454977 | -                | ligB              | DNA ligase B                                                |
| G2583_4384 | CDS        | 4455235 | 4455858 | +                | gmk               | Guanylate kinase                                            |
| G2583_4385 | CDS        | 4455913 | 4456188 | +                | rpoZ              | DNA-directed RNA polymerase, subunit K/omega                |
| G2583_4386 | CDS        | 4456207 | 4458315 | +                | spoT              | Guanosine-3',5'-bis(diphosphate) 3'-pyrophosphohydrolase    |
| G2583_4387 | CDS        | 4458322 | 4459011 | +                | trmH              | tRNA guanosine-2'-O-methyltransferase                       |
| G2583_4388 | CDS        | 4459017 | 4461098 | +                | recG              | ATP-dependent DNA helicase recG                             |
| G2583_4389 | CDS        | 4461083 | 4461949 | -                | -                 | hypothetical protein                                        |
| G2583_4390 | CDS        | 4461952 | 4463157 | -                | gltS              | Glutamate transport protein                                 |
| G2583_4391 | CDS        | 4463437 | 4464828 | +                | yicE              | Putative purine permease yicE                               |
| G2583_4392 | CDS        | 4464949 | 4466658 | +                | yicH              | hypothetical protein                                        |
| G2583_4393 | CDS        | 4466711 | 4469029 | -                | yicI              | Alpha-xylosidase                                            |
| G2583_4394 | CDS        | 4469039 | 4470421 | -                | yicJ              | Sugar transporter, glycoside-pentoside-hexuronide           |
| G2583_4395 | tRNA       | 4470714 | 4470808 | +                | -                 | Sec tRNA                                                    |
| G2583_4396 | CDS        | 4470932 | 4472185 | +                | intL              | CP4-like integrase                                          |
| G2583_4397 | CDS        | 4472284 | 4472631 | +                | insN              | unknown protein encoded by IS911 within prophage CP-933L    |
| G2583_4398 | CDS        | 4472844 | 4473497 | +                | -                 | putative transposase                                        |
| G2583_4399 | CDS        | 4473494 | 4473658 | +                | -                 | hypothetical protein                                        |
| G2583_4400 | CDS        | 4473748 | 4474122 | +                | -                 | unknown protein encoded within prophage CP-933L             |
| G2583_4401 | CDS        | 4474119 | 4474610 | +                | -                 | unknown protein encoded within prophage CP-933L             |
| G2583_4402 | CDS        | 4474604 | 4474819 | +                | -                 | hypothetical protein                                        |
| G2583_4403 | pseudogene | 4474904 | 4475746 | +                | -                 | hypothetical protein                                        |
| G2583_4404 | CDS        | 4476081 | 4476314 | +                | -                 | hypothetical protein                                        |
| G2583_4405 | CDS        | 4476749 | 4477513 | -                | espF              | espF                                                        |
| G2583_4406 | CDS        | 4477598 | 4477876 | -                | -                 | hypothetical protein                                        |
| G2583_4407 | CDS        | 4477882 | 4478103 | -                | EscF              | Type III secretion apparatus needle protein                 |
| G2583_4408 | CDS        | 4478139 | 4478546 | -                | -                 | hypothetical protein                                        |
| G2583_4409 | CDS        | 4478553 | 4479491 | -                | espB              | Secreted protein EspB                                       |
| G2583_4410 | CDS        | 4479512 | 4480636 | -                | espD              | secreted protein EspD                                       |
| G2583_4411 | CDS        | 4480649 | 4481227 | -                | espA              | espA                                                        |
| G2583_4412 | CDS        | 4481286 | 4482341 | -                | sepL              | SepL                                                        |
| G2583_4413 | CDS        | 4482484 | 4483704 | +                | EscD              | Pas                                                         |
| G2583_4414 | CDS        | 4483968 | 4486772 | -                | eae               | Gamma intimin                                               |
| G2583_4415 | CDS        | 4486832 | 4487302 | -                | CesT              | Tir chaperone                                               |
| G2583_4416 | CDS        | 4487440 | 4489110 | -                | tir               | Translocated intimin receptor Tir                           |
| G2583_4417 | CDS        | 4489534 | 4490145 | -                | ipgB              | hypothetical protein                                        |
| G2583_4418 | CDS        | 4490411 | 4490794 | +                | -                 | hypothetical protein                                        |
| G2583_4419 | CDS        | 4490992 | 4491498 | -                | -                 | hypothetical protein                                        |
| G2583_4420 | CDS        | 4491529 | 4492446 | -                | SepQ              | sepQ                                                        |
| G2583_4421 | CDS        | 4492409 | 4492825 | -                | -                 | hypothetical protein                                        |
| G2583_4422 | CDS        | 4492818 | 4493195 | -                | -                 | hypothetical protein                                        |
| G2583_4423 | CDS        | 4493198 | 4494538 | -                | escN              | escN                                                        |
| G2583_4424 | CDS        | 4494522 | 4496549 | -                | escV              | escV                                                        |
| G2583_4425 | CDS        | 4496546 | 4496899 | -                | -                 | hypothetical protein                                        |
| G2583_4426 | CDS        | 4497084 | 4497383 | +                | sepZ              | SepZ                                                        |
| G2583_4427 | CDS        | 4497416 | 4497844 | +                | -                 | hypothetical protein                                        |
| G2583_4428 | CDS        | 4497847 | 4498419 | +                | EscJ              | EscJ                                                        |
| G2583_4429 | CDS        | 4498425 | 4498880 | +                | SepD              | hypothetical protein                                        |
| G2583_4430 | CDS        | 4498880 | 4500418 | +                | EscC              | escC                                                        |
| G2583_4431 | CDS        | 4500432 | 4500887 | +                | cesD              | Type III secretion low calcium response chaperone LcrH/SycD |

| Locus_tag  | Type       | Start   | End     | +/- <sup>a</sup> | Gene <sup>b</sup> | Product                                                     |
|------------|------------|---------|---------|------------------|-------------------|-------------------------------------------------------------|
| G2583_4432 | CDS        | 4501271 | 4501684 | -                | -                 | hypothetical protein                                        |
| G2583_4433 | CDS        | 4501739 | 4502110 | -                | -                 | hypothetical protein                                        |
| G2583_4434 | CDS        | 4502288 | 4502764 | +                | -                 | transglycosylase SLT domain                                 |
| G2583_4435 | CDS        | 4502761 | 4503798 | -                | escU              | secretion system apparatus protein SsaU                     |
| G2583_4436 | CDS        | 4503791 | 4504567 | -                | EscT              | escT                                                        |
| G2583_4437 | CDS        | 4504567 | 4504839 | -                | EscS              | EscS                                                        |
| G2583_4438 | CDS        | 4504836 | 4505489 | -                | escR              | Type III secretion system EscR protein                      |
| G2583_4439 | CDS        | 4505494 | 4506189 | -                | -                 | hypothetical protein                                        |
| G2583_4440 | CDS        | 4506134 | 4506733 | -                | -                 | hypothetical protein                                        |
| G2583_4441 | CDS        | 4506730 | 4507053 | -                | -                 | hypothetical protein                                        |
| G2583_4442 | CDS        | 4507057 | 4507275 | -                | -                 | type III secretion system protein, YseE family              |
| G2583_4443 | CDS        | 4507290 | 4507679 | -                | -                 | hypothetical protein                                        |
| G2583_4444 | CDS        | 4508913 | 4510109 | +                | EspG              | hypothetical protein                                        |
| G2583_4445 | CDS        | 4510237 | 4511055 | +                | -                 | hypothetical protein                                        |
| G2583_4446 | CDS        | 4511369 | 4511611 | -                | -                 | conserved hypothetical protein                              |
| G2583_4447 | CDS        | 4511827 | 4512021 | -                | -                 | hypothetical protein                                        |
| G2583_4448 | CDS        | 4512075 | 4512998 | +                | yicL              | YicL                                                        |
| G2583_4449 | CDS        | 4513002 | 4513820 | -                | nlpA              | Lipoprotein 28 precursor                                    |
| G2583_4450 | CDS        | 4513973 | 4514335 | +                | yicS              | hypothetical protein                                        |
| G2583_4451 | CDS        | 4514376 | 4515614 | -                | nepl              | Major facilitator family transporter                        |
| G2583_4452 | CDS        | 4515800 | 4516153 | +                | -                 | hypothetical protein                                        |
| G2583_4453 | CDS        | 4516137 | 4516460 | +                | -                 | Putative DNA-binding protein                                |
| G2583_4454 | CDS        | 4516576 | 4517055 | -                | yicN              | hypothetical protein                                        |
| G2583_4455 | pseudogene | 4517081 | 4518414 | -                | yicO              | Inorganic anion transporter, sulfate permease (SulP) family |
| G2583_4456 | CDS        | 4518589 | 4520355 | +                | ade               | Adenine deaminase                                           |
| G2583_4457 | CDS        | 4520401 | 4521792 | -                | uhpT              | Hexose phosphate transport protein                          |
| G2583_4458 | CDS        | 4521930 | 4523252 | -                | uhpC              | Regulator of uhpT                                           |
| G2583_4459 | CDS        | 4523259 | 4524764 | -                | uhpB              | sensory histidine kinase UhpB                               |
| G2583_4460 | CDS        | 4524761 | 4525351 | -                | uhpA              | transcriptional regulatory protein UhpA                     |
| G2583_4461 | CDS        | 4525513 | 4526946 | -                | -                 | hypothetical protein                                        |
| G2583_4462 | CDS        | 4527226 | 4527708 | -                | -                 | hypothetical protein                                        |
| G2583_4463 | pseudogene | 4527226 | 4528521 | -                | -                 | hypothetical protein                                        |
| G2583_4464 | CDS        | 4528772 | 4529062 | -                | ilvN              | Acetolactate synthase isozyme 1 small subunit               |
| G2583_4465 | CDS        | 4529066 | 4530754 | -                | ilvB              | Acetolactate synthase, large subunit, isozyme I             |
| G2583_4467 | CDS        | 4530860 | 4530958 | -                | ilvL              | ilvBN operon leader peptide                                 |
| G2583_4468 | CDS        | 4531886 | 4533076 | +                | emrD              | Multidrug resistance protein D                              |
| G2583_4469 | CDS        | 4533084 | 4533581 | -                | yidF              | putative transcriptional regulator                          |
| G2583_4470 | CDS        | 4533578 | 4533940 | -                | yidG              | Inner membrane protein yidG                                 |
| G2583_4471 | CDS        | 4533930 | 4534277 | -                | yidH              | Inner membrane protein yidH                                 |
| G2583_4472 | CDS        | 4534386 | 4534835 | +                | yidI              | hypothetical protein                                        |
| G2583_4473 | CDS        | 4534882 | 4536375 | -                | yidJ              | Sulfatase                                                   |
| G2583_4474 | CDS        | 4536372 | 4538087 | -                | yidK              | Transporter, solute:sodium symporter (SSS) family           |
| G2583_4475 | CDS        | 4538224 | 4539147 | +                | yidL              | putative ARAC-type regulatory protein                       |
| G2583_4476 | CDS        | 4539144 | 4540466 | -                | glvA              | Maltose-6'-phosphate glucosidase                            |
| G2583_4477 | CDS        | 4540466 | 4542088 | -                | glvC              | PTS system arbutin-like IIC component                       |
| G2583_4478 | CDS        | 4542377 | 4543093 | +                | yidP              | transcriptional regulator, GntR family                      |
| G2583_4479 | CDS        | 4543090 | 4544751 | -                | yidE              | Putative transport protein yidE                             |
| G2583_4480 | CDS        | 4544947 | 4545375 | -                | ibpB              | Small heat shock protein ibpB                               |
| G2583_4481 | CDS        | 4545487 | 4545900 | -                | ibpA              | Small heat shock protein ibpA                               |
| G2583_4482 | CDS        | 4546131 | 4546538 | +                | yidQ              | hypothetical protein                                        |
| G2583_4483 | CDS        | 4546540 | 4547790 | -                | yidR              | hypothetical protein                                        |
| G2583_4484 | CDS        | 4547837 | 4548919 | +                | cbrA              | conserved hypothetical protein                              |
| G2583_4485 | CDS        | 4549165 | 4549821 | +                | yidX              | Putative replicase                                          |
| G2583_4486 | CDS        | 4549867 | 4550679 | -                | yidA              | Phosphatase yidA                                            |
| G2583_4487 | CDS        | 4550794 | 4551201 | -                | yidB              | hypothetical protein                                        |
| G2583_4488 | CDS        | 4551432 | 4553846 | -                | gyrB              | DNA gyrase subunit B                                        |
| G2583_4489 | CDS        | 4553875 | 4554948 | -                | recF              | DNA replication and repair protein recF                     |
| G2583_4490 | CDS        | 4554948 | 4556048 | -                | dnaN              | DNA polymerase III subunit beta                             |
| G2583_4491 | CDS        | 4556053 | 4557456 | -                | dnaA              | Chromosomal replication initiator protein dnaA              |
| G2583_4492 | CDS        | 4558063 | 4558203 | +                | rpmH              | hypothetical protein                                        |

| Locus_tag  | Type       | Start   | End     | +/- <sup>a</sup> | Gene <sup>b</sup> | Product                                                                  |
|------------|------------|---------|---------|------------------|-------------------|--------------------------------------------------------------------------|
| G2583_4493 | CDS        | 4558220 | 4558579 | +                | rnpA              | Ribonuclease P protein component                                         |
| G2583_4494 | CDS        | 4558803 | 4560449 | +                | yidC              | Preprotein translocase subunit YidC                                      |
| G2583_4495 | CDS        | 4560555 | 4561919 | +                | mnmE              | tRNA modification GTPase trmE                                            |
| G2583_4496 | CDS        | 4562069 | 4564240 | -                | -                 | ShET2 enterotoxin, N-region family                                       |
| G2583_4497 | CDS        | 4564345 | 4564449 | -                | -                 | hypothetical protein                                                     |
| G2583_4498 | CDS        | 4564640 | 4564714 | +                | tnaL              | tryptophanase leader peptide                                             |
| G2583_4499 | CDS        | 4564920 | 4566350 | +                | tnaA              | Tryptophanase                                                            |
| G2583_4500 | CDS        | 4566441 | 4567688 | +                | tnaB              | Low affinity tryptophan permease                                         |
| G2583_4501 | CDS        | 4567820 | 4568995 | +                | mdtL              | Multidrug resistance protein mdtL                                        |
| G2583_4502 | CDS        | 4568970 | 4569929 | +                | yidZ              | DNA-binding transcriptional regulator YidZ                               |
| G2583_4503 | CDS        | 4570074 | 4570835 | +                | yieE              | hypothetical protein                                                     |
| G2583_4504 | CDS        | 4570857 | 4571423 | +                | yieF              | hypothetical protein                                                     |
| G2583_4505 | CDS        | 4571477 | 4572814 | -                | yieG              | Putative membrane transport protein                                      |
| G2583_4506 | CDS        | 4572980 | 4573645 | +                | yieH              | HAD hydrolase, IA family                                                 |
| G2583_4507 | CDS        | 4573782 | 4576190 | -                | -                 | hypothetical protein                                                     |
| G2583_4508 | CDS        | 4576491 | 4577162 | +                | -                 | hypothetical protein                                                     |
| G2583_4509 | CDS        | 4577208 | 4577678 | +                | -                 | hypothetical protein                                                     |
| G2583_4510 | CDS        | 4577777 | 4577956 | -                | -                 | hypothetical protein                                                     |
| G2583_4511 | pseudogene | 4578135 | 4580634 | -                | -                 | hypothetical protein                                                     |
| G2583_4512 | CDS        | 4580615 | 4580821 | -                | -                 | hypothetical protein                                                     |
| G2583_4513 | CDS        | 4580887 | 4581102 | -                | -                 | hypothetical protein                                                     |
| G2583_4514 | CDS        | 4581059 | 4581784 | -                | phoU              | Phosphate transport system regulatory protein PhoU                       |
| G2583_4515 | CDS        | 4581799 | 4582572 | -                | pstB              | Phosphate import ATP-binding protein pstB                                |
| G2583_4516 | CDS        | 4582755 | 4583645 | -                | pstA              | Phosphate ABC transporter, permease protein PstA                         |
| G2583_4517 | CDS        | 4583645 | 4584604 | -                | pstC              | Phosphate transport system permease protein pstC                         |
| G2583_4518 | CDS        | 4584691 | 4585731 | -                | pstS              | Phosphate ABC transporter, periplasmic phosphate-binding                 |
| G2583_4519 | CDS        | 4585943 | 4587025 | -                | lpfD              | Fimbrial family protein                                                  |
| G2583_4520 | CDS        | 4587053 | 4588144 | -                | lpfD              | Putative fimbrial protein                                                |
| G2583_4521 | pseudogene | 4588156 | 4590690 | -                | lpfC              | fimbrial usher protein                                                   |
| G2583_4522 | CDS        | 4590712 | 4590873 | -                | stgB              | Putative fimbrial chaperone                                              |
| G2583_4523 | CDS        | 4591014 | 4591397 | -                | stgB              | Putative fimbrial chaperone                                              |
| G2583_4524 | CDS        | 4591500 | 4592102 | -                | lpfA              | Fimbrial protein                                                         |
| G2583_4525 | CDS        | 4592802 | 4594631 | -                | glmS              | Glucosamine--fructose-6-phosphate aminotransferase                       |
| G2583_4526 | CDS        | 4594793 | 4596163 | -                | glmU              | Bifunctional protein glmU [Includes: UDP-N-acetylglucosamine             |
| G2583_4527 | CDS        | 4596515 | 4596934 | -                | atpC              | ATP synthase epsilon chain                                               |
| G2583_4528 | CDS        | 4596955 | 4598337 | -                | atpD              | ATP synthase subunit beta                                                |
| G2583_4529 | CDS        | 4598364 | 4599227 | -                | atpG              | ATP synthase gamma chain                                                 |
| G2583_4530 | CDS        | 4599278 | 4600819 | -                | atpA              | ATP synthase subunit alpha                                               |
| G2583_4531 | CDS        | 4600832 | 4601365 | -                | atpH              | ATP synthase delta chain                                                 |
| G2583_4532 | CDS        | 4601380 | 4601850 | -                | atpF              | ATP synthase B chain                                                     |
| G2583_4533 | CDS        | 4601912 | 4602151 | -                | atpE              | ATP synthase C chain                                                     |
| G2583_4534 | CDS        | 4602198 | 4603013 | -                | atpB              | ATP synthase A chain                                                     |
| G2583_4535 | CDS        | 4603022 | 4603414 | -                | atpI              | Membrane-bound ATP synthase                                              |
| G2583_4536 | CDS        | 4604019 | 4604642 | -                | gidB              | Ribosomal RNA small subunit methyltransferase G                          |
| G2583_4537 | CDS        | 4604706 | 4606595 | -                | mnmG              | tRNA uridine 5-carboxymethylaminomethyl modification enzyme              |
| G2583_4538 | CDS        | 4606974 | 4607417 | -                | mioC              | flavodoxin                                                               |
| G2583_4539 | CDS        | 4607507 | 4607965 | -                | asnC              | DNA-binding transcriptional regulator AsnC                               |
| G2583_4540 | CDS        | 4608117 | 4609109 | +                | asnA              | Aspartate--ammonia ligase                                                |
| G2583_4541 | CDS        | 4609114 | 4610565 | -                | viaA              | hypothetical protein                                                     |
| G2583_4542 | CDS        | 4610559 | 4612079 | -                | ravA              | ATPase ravA                                                              |
| G2583_4543 | CDS        | 4612278 | 4614146 | +                | kup               | Low affinity potassium transport system protein kup                      |
| G2583_4544 | CDS        | 4614301 | 4614732 | +                | rbsD              | D-ribose high-affinity transport system                                  |
| G2583_4545 | CDS        | 4614740 | 4616245 | +                | rbsA              | Ribose import ATP-binding protein rbsA                                   |
| G2583_4546 | CDS        | 4616250 | 4617215 | +                | rbsC              | Ribose transport system permease protein rbsC                            |
| G2583_4547 | CDS        | 4617240 | 4618130 | +                | rbsB              | D-ribose-binding periplasmic protein                                     |
| G2583_4548 | CDS        | 4618241 | 4619185 | +                | rbsK              | Ribokinase                                                               |
| G2583_4549 | CDS        | 4619189 | 4620181 | +                | rbsR              | Regulator for rbs operon                                                 |
| G2583_4550 | CDS        | 4620147 | 4621574 | -                | hsrA              | Drug resistance MFS transporter, drug:H <sup>+</sup> antiporter-1 (DHA2) |
| G2583_4551 | CDS        | 4621597 | 4622289 | -                | yieP              | hypothetical protein                                                     |
| G2583_4552 | rRNA       | 4622773 | 4624314 | +                | rrsC              | 16S ribosomal RNA                                                        |

| Locus_tag  | Type  | Start   | End     | +/- <sup>a</sup> | Gene <sup>b</sup> | Product                                                   |
|------------|-------|---------|---------|------------------|-------------------|-----------------------------------------------------------|
| G2583_4553 | tRNA  | 4624399 | 4624476 | +                | -                 | Glu tRNA                                                  |
| G2583_4554 | rRNA  | 4624669 | 4627572 | +                | rrlC              | 23S ribosomal RNA                                         |
| G2583_4555 | rRNA  | 4627667 | 4627782 | +                | rrfC              | 5S ribosomal RNA                                          |
| G2583_4556 | tRNA  | 4627836 | 4627914 | +                | -                 | Asp tRNA                                                  |
| G2583_4557 | tRNA  | 4627921 | 4627998 | +                | -                 | Trp tRNA                                                  |
| G2583_4558 | CDS   | 4628093 | 4628932 | -                | hdfR              | transcriptional regulator HdfR                            |
| G2583_4559 | CDS   | 4629051 | 4629389 | +                | yifE              | UPF0438 protein yifE                                      |
| G2583_4560 | CDS   | 4629414 | 4630964 | -                | yifB              | Putative 2-component regulator                            |
| G2583_4561 | CDS   | 4631287 | 4631385 | +                | ilvL              | ilvGMEDA operon leader peptide                            |
| G2583_4562 | CDS   | 4631525 | 4633171 | +                | ilvG              | Acetolactate synthase, large subunit, isozyme II          |
| G2583_4563 | CDS   | 4633168 | 4633431 | +                | ilvM              | Acetolactate synthase isozyme 2 small subunit             |
| G2583_4564 | CDS   | 4633451 | 4634380 | +                | ilvE              | Branched-chain-amino-acid aminotransferase                |
| G2583_4565 | CDS   | 4634445 | 4636295 | +                | ilvD              | Dihydroxy-acid dehydratase                                |
| G2583_4566 | CDS   | 4636298 | 4637842 | +                | ilvA              | Threonine dehydratase biosynthetic                        |
| G2583_4567 | CDS   | 4637894 | 4638787 | -                | ilvY              | DNA-binding transcriptional regulator IlvY                |
| G2583_4568 | CDS   | 4638937 | 4640412 | +                | ilvC              | Ketol-acid reductoisomerase                               |
| G2583_4569 | CDS   | 4640458 | 4640739 | -                | ppiC              | Peptidyl-prolyl cis-trans isomerase C                     |
| G2583_4570 | CDS   | 4640938 | 4641387 | -                | yifO              | hypothetical protein                                      |
| G2583_4571 | CDS   | 4641604 | 4643625 | +                | rep               | ATP-dependent DNA helicase Rep                            |
| G2583_4572 | CDS   | 4643672 | 4645156 | -                | gpp               | Guanosine-5'-triphosphate,3'-diphosphate pyrophosphatase  |
| G2583_4573 | CDS   | 4645292 | 4646557 | -                | rhIB              | ATP-dependent RNA helicase RhIB                           |
| G2583_4574 | CDS   | 4646634 | 4647017 | +                | trxA              | thioredoxin TrxA                                          |
| G2583_4575 | CDS   | 4647158 | 4647259 | +                | rhoL              | rho operon leader peptide                                 |
| G2583_4576 | CDS   | 4647344 | 4648603 | +                | rho               | Transcription termination factor rho                      |
| G2583_4577 | CDS   | 4648613 | 4648831 | +                | -                 | hypothetical protein                                      |
| G2583_4578 | CDS   | 4648843 | 4649946 | +                | rfe               | Undecaprenyl-phosphate alpha-N-acetylglucosaminyl 1-      |
| G2583_4579 | CDS   | 4649955 | 4651004 | +                | wzzE              | Lipopolysaccharide biosynthesis protein                   |
| G2583_4580 | CDS   | 4651018 | 4652190 | +                | rffE              | UDP-N-acetylglucosamine 2-epimerase                       |
| G2583_4581 | CDS   | 4652187 | 4653449 | +                | rffD              | UDP-N-acetyl-D-mannosamine dehydrogenase                  |
| G2583_4582 | CDS   | 4653449 | 4654516 | +                | rffG              | dTDP-glucose 4,6-dehydratase                              |
| G2583_4583 | CDS   | 4654535 | 4655416 | +                | rffH              | Glucose-1-phosphate thymidyltransferase                   |
| G2583_4584 | CDS   | 4655394 | 4656068 | +                | rffC              | TDP-D-fucosamine acetyltransferase                        |
| G2583_4585 | CDS   | 4656073 | 4657203 | +                | rffA              | TDP-4-oxo-6-deoxy-D-glucose transaminase                  |
| G2583_4586 | CDS   | 4657205 | 4658455 | +                | wzxE              | Polysaccharide biosynthesis protein                       |
| G2583_4587 | CDS   | 4658452 | 4659531 | +                | rffT              | TDP-Fuc4NAc:lipid II Fuc4NAc transferase                  |
| G2583_4588 | CDS   | 4659528 | 4660880 | +                | wzyE              | Putative ECA polymerase                                   |
| G2583_4589 | CDS   | 4660883 | 4661623 | +                | rffM              | Probable UDP-N-acetyl-D-mannosaminuronic acid transferase |
| G2583_4590 | CDS   | 4661814 | 4663199 | +                | yifK              | Probable transport protein yifK                           |
| G2583_4591 | tRNA  | 4663302 | 4663378 | +                | -                 | Arg tRNA                                                  |
| G2583_4592 | tRNA  | 4663436 | 4663513 | +                | -                 | His tRNA                                                  |
| G2583_4593 | tRNA  | 4663532 | 4663620 | +                | -                 | Leu tRNA                                                  |
| G2583_4594 | tRNA  | 4663662 | 4663724 | +                | -                 | Pro tRNA                                                  |
| G2583_4595 | CDS   | 4663885 | 4665120 | +                | aslB              | Arylsulfatase-activating protein AslB                     |
| G2583_4596 | CDS   | 4665288 | 4666943 | -                | aslA              | Arylsulfatase precursor                                   |
| G2583_4597 | ncRNA | 4667368 | 4667539 | +                | -                 | ncRNA                                                     |
| G2583_4598 | CDS   | 4667622 | 4668818 | -                | hemY              | putative protoheme IX biogenesis protein                  |
| G2583_4599 | CDS   | 4668821 | 4670002 | -                | hemX              | Uroporphyrinogen III methylase                            |
| G2583_4600 | CDS   | 4670024 | 4670764 | -                | hemD              | Uroporphyrinogen-III synthase                             |
| G2583_4601 | CDS   | 4670761 | 4671723 | -                | hemC              | Porphobilinogen deaminase                                 |
| G2583_4602 | CDS   | 4672089 | 4674635 | +                | cyaA              | Adenylate cyclase                                         |
| G2583_4603 | CDS   | 4674675 | 4674995 | -                | cyaY              | iron donor protein CyaY                                   |
| G2583_4604 | CDS   | 4674786 | 4675271 | +                | yzcX              | hypothetical protein                                      |
| G2583_4605 | CDS   | 4675458 | 4675661 | +                | yifL              | Uncharacterized lipoprotein yifL precursor                |
| G2583_4606 | CDS   | 4675698 | 4676522 | +                | dapF              | Diaminopimelate epimerase                                 |
| G2583_4607 | CDS   | 4676519 | 4677226 | +                | yigA              | hypothetical protein                                      |
| G2583_4608 | CDS   | 4677223 | 4678119 | +                | xerC              | Tyrosine recombinase xerC                                 |
| G2583_4609 | CDS   | 4678119 | 4678835 | +                | yigB              | HAD-superfamily hydrolase                                 |
| G2583_4610 | CDS   | 4678919 | 4681081 | +                | uvrD              | DNA helicase II                                           |
| G2583_4611 | CDS   | 4681126 | 4682028 | -                | orf               | hypothetical protein                                      |
| G2583_4612 | CDS   | 4682111 | 4682875 | -                | yigE              | hypothetical protein                                      |

| Locus_tag  | Type  | Start   | End     | +/- <sup>a</sup> | Gene <sup>b</sup> | Product                                                     |
|------------|-------|---------|---------|------------------|-------------------|-------------------------------------------------------------|
| G2583_4613 | CDS   | 4683245 | 4684195 | +                | corA              | Magnesium transport protein corA                            |
| G2583_4614 | CDS   | 4684237 | 4684728 | -                | -                 | putative membrane protein                                   |
| G2583_4615 | CDS   | 4684725 | 4685573 | -                | -                 | hypothetical protein                                        |
| G2583_4616 | CDS   | 4685709 | 4685906 | +                | -                 | hypothetical protein                                        |
| G2583_4617 | CDS   | 4685931 | 4686317 | -                | -                 | hypothetical protein                                        |
| G2583_4618 | CDS   | 4686518 | 4686832 | +                | -                 | Hypothetical membrane protein                               |
| G2583_4619 | CDS   | 4686879 | 4687766 | -                | rarD              | hypothetical protein                                        |
| G2583_4620 | CDS   | 4687818 | 4688285 | -                | yigl              | Thioesterase family protein                                 |
| G2583_4621 | CDS   | 4688450 | 4689319 | +                | pldA              | Phospholipase A1 precursor                                  |
| G2583_4622 | CDS   | 4689446 | 4691281 | +                | recQ              | ATP-dependent DNA helicase RecQ                             |
| G2583_4623 | CDS   | 4691345 | 4691965 | +                | rhtC              | Threonine efflux protein                                    |
| G2583_4624 | CDS   | 4692027 | 4692647 | -                | rhtB              | Homoserine/homoserine lactone efflux protein                |
| G2583_4625 | CDS   | 4692758 | 4693780 | +                | pldB              | Lysophospholipase L2                                        |
| G2583_4626 | CDS   | 4693671 | 4694588 | +                | yigL              | Putative hydrolase                                          |
| G2583_4627 | CDS   | 4694664 | 4695563 | +                | yigM              | Uncharacterized membrane protein yigM                       |
| G2583_4628 | CDS   | 4695451 | 4696404 | -                | metR              | regulator for metE and metH                                 |
| G2583_4629 | CDS   | 4696640 | 4698901 | +                | metE              | 5-methyltetrahydropteroyltriglutamate-homocysteine S-       |
| G2583_4630 | CDS   | 4698941 | 4699822 | -                | ysgA              | Putative enzyme                                             |
| G2583_4631 | CDS   | 4700018 | 4700779 | +                | udp               | Uridine phosphorylase                                       |
| G2583_4632 | CDS   | 4700920 | 4702347 | +                | rmuC              | DNA recombination protein rmuC                              |
| G2583_4633 | CDS   | 4702442 | 4703197 | +                | ubiE              | Ubiquinone/menaquinone biosynthesis methyltransferase ubiE  |
| G2583_4634 | CDS   | 4703211 | 4703816 | +                | yigP              | hypothetical protein                                        |
| G2583_4635 | CDS   | 4703813 | 4705453 | +                | ubiB              | Probable ubiquinone biosynthesis protein ubiB               |
| G2583_4636 | CDS   | 4705490 | 4705801 | +                | tatA              | Sec-independent twin-arginine translocase subunit TatA      |
| G2583_4637 | CDS   | 4705805 | 4706320 | +                | tatB              | sec-independent translocase                                 |
| G2583_4638 | CDS   | 4706323 | 4707099 | +                | tatC              | TatABCE protein translocation system subunit                |
| G2583_4639 | CDS   | 4707129 | 4707923 | +                | tatD              | MttC                                                        |
| G2583_4640 | CDS   | 4707920 | 4708408 | -                | rfaH              | transcriptional activator RfaH                              |
| G2583_4641 | CDS   | 4708575 | 4710068 | +                | ubiD              | 3-octaprenyl-4-hydroxybenzoate carboxy-lyase                |
| G2583_4642 | CDS   | 4710114 | 4710815 | +                | fre               | Oxidoreductase                                              |
| G2583_4643 | CDS   | 4711007 | 4712170 | -                | fadA              | Beta-ketoadipyl CoA thiolase                                |
| G2583_4644 | CDS   | 4712180 | 4714369 | -                | fadB              | Fused 3-hydroxybutyryl-CoA epimerase/delta(3)-cis-delta(2)- |
| G2583_4645 | CDS   | 4714559 | 4715890 | +                | pepQ              | Xaa-Pro dipeptidase                                         |
| G2583_4646 | CDS   | 4715887 | 4716504 | +                | yigZ              | hypothetical protein                                        |
| G2583_4647 | CDS   | 4716543 | 4717994 | +                | trkH              | Trk system potassium uptake protein trkH                    |
| G2583_4648 | CDS   | 4718006 | 4718551 | +                | hemG              | Protoporphyrinogen oxidase                                  |
| G2583_4649 | rRNA  | 4718929 | 4720470 | +                | rrsA              | 16S ribosomal RNA                                           |
| G2583_4650 | tRNA  | 4720539 | 4720615 | +                | -                 | Ile tRNA                                                    |
| G2583_4651 | tRNA  | 4720657 | 4720734 | +                | -                 | Ala tRNA                                                    |
| G2583_4652 | rRNA  | 4720917 | 4723819 | +                | rrlA              | 23S ribosomal RNA                                           |
| G2583_4653 | rRNA  | 4723914 | 4724029 | +                | rrfA              | 5S ribosomal RNA                                            |
| G2583_4654 | CDS   | 4724130 | 4724657 | -                | mobB              | Molybdopterin-guanine dinucleotide biosynthesis protein B   |
| G2583_4655 | CDS   | 4724639 | 4725223 | -                | mobA              | Molybdopterin-guanine dinucleotide biosynthesis protein A   |
| G2583_4656 | CDS   | 4725293 | 4725562 | +                | yihD              | hypothetical protein                                        |
| G2583_4657 | CDS   | 4725639 | 4726625 | +                | rdoA              | predicted kinase                                            |
| G2583_4658 | CDS   | 4726642 | 4727268 | +                | dsbA              | Thiol:disulfide interchange protein dsbA precursor          |
| G2583_4659 | CDS   | 4727381 | 4728853 | +                | yihF              | Putative GTP-binding protein                                |
| G2583_4660 | CDS   | 4728894 | 4729826 | -                | yihG              | Acyltransferase domain protein                              |
| G2583_4661 | CDS   | 4729946 | 4730188 | -                | -                 | hypothetical protein                                        |
| G2583_4662 | CDS   | 4730190 | 4732976 | +                | polA              | DNA polymerase I                                            |
| G2583_4663 | ncRNA | 4733114 | 4733232 | +                | spf               | ncRNA                                                       |
| G2583_4664 | CDS   | 4733358 | 4733990 | -                | yihA              | Probable GTP-binding protein engB                           |
| G2583_4665 | ncRNA | 4734261 | 4734514 | +                | -                 | ncRNA                                                       |
| G2583_4666 | CDS   | 4734572 | 4735078 | +                | yihI              | UPF0241 protein yihI                                        |
| G2583_4667 | CDS   | 4735267 | 4736640 | +                | hemN              | Oxygen-independent coproporphyrinogen III oxidase           |
| G2583_4668 | CDS   | 4737052 | 4738470 | -                | glnG              | Nitrogen regulation protein NR                              |
| G2583_4669 | CDS   | 4738473 | 4739522 | -                | glnL              | Signal transduction histidine kinase, nitrogen specific     |
| G2583_4670 | CDS   | 4739696 | 4741105 | -                | glnA              | Glutamine synthetase                                        |
| G2583_4671 | CDS   | 4741478 | 4743301 | +                | typA              | GTP-binding protein typA/bipA                               |
| G2583_4672 | CDS   | 4743518 | 4744228 | +                | yihL              | putative transcriptional regulator                          |

| Locus_tag  | Type       | Start   | End     | +/- <sup>a</sup> | Gene <sup>b</sup> | Product                                                     |
|------------|------------|---------|---------|------------------|-------------------|-------------------------------------------------------------|
| G2583_4673 | CDS        | 4744236 | 4745216 | +                | yihM              | AP endonuclease, family 2                                   |
| G2583_4674 | CDS        | 4745318 | 4746583 | +                | yihN              | Transporter, major facilitator family                       |
| G2583_4675 | CDS        | 4746674 | 4747432 | -                | ompL              | hypothetical protein                                        |
| G2583_4676 | CDS        | 4747433 | 4748842 | -                | yihO              | Sugar (Glycoside-Pentoside-Hexuronide) transporter family   |
| G2583_4677 | CDS        | 4748876 | 4750261 | -                | yihP              | Sugar transporter family protein                            |
| G2583_4678 | CDS        | 4750307 | 4752343 | -                | yihQ              | Glycosyl hydrolase, family 31                               |
| G2583_4679 | CDS        | 4752451 | 4753326 | -                | -                 | hypothetical protein                                        |
| G2583_4680 | CDS        | 4753387 | 4754289 | -                | yihR              | Aldose-1-epimerase family protein                           |
| G2583_4681 | CDS        | 4754356 | 4755597 | -                | yihS              | N-acylglucosamine 2-epimerase                               |
| G2583_4682 | CDS        | 4755613 | 4756491 | -                | yihT              | Uncharacterized aldolase yihT                               |
| G2583_4683 | CDS        | 4756515 | 4757411 | -                | yihU              | 3-hydroxyisobutyrate dehydrogenase family                   |
| G2583_4684 | CDS        | 4757572 | 4758474 | +                | yihV              | Kinase, PfkB family                                         |
| G2583_4685 | CDS        | 4758484 | 4759293 | +                | yihW              | Putative DEOR-type transcriptional activator                |
| G2583_4686 | CDS        | 4759392 | 4759991 | +                | yihX              | Phosphatase YihX                                            |
| G2583_4687 | CDS        | 4759985 | 4760857 | +                | yihY              | tRNA-processing ribonuclease BN                             |
| G2583_4688 | CDS        | 4760854 | 4761291 | +                | dtd               | D-tyrosyl-tRNA(Tyr) deacylase                               |
| G2583_4689 | CDS        | 4761288 | 4762277 | +                | yiiD              | putative acetyltransferase                                  |
| G2583_4690 | CDS        | 4762688 | 4764502 | +                | -                 | hypothetical protein                                        |
| G2583_4691 | CDS        | 4764675 | 4764893 | -                | -                 | hypothetical protein                                        |
| G2583_4692 | CDS        | 4764895 | 4765011 | -                | -                 | hypothetical protein                                        |
| G2583_4693 | CDS        | 4765169 | 4765414 | +                | yiiE              | Ribbon-helix-helix protein, copG family                     |
| G2583_4694 | CDS        | 4765631 | 4765873 | +                | yiiF              | hypothetical protein                                        |
| G2583_4695 | CDS        | 4766203 | 4767132 | -                | fdhE              | protein AraJ                                                |
| G2583_4696 | CDS        | 4767129 | 4767764 | -                | fdol              | Formate dehydrogenase, cytochrome b556(fdo) subunit         |
| G2583_4697 | CDS        | 4767761 | 4768663 | -                | fdoH              | Formate dehydrogenase-O, iron-sulfur subunit                |
| G2583_4698 | pseudogene | 4768676 | 4771726 | -                | fdoG              | formate dehydrogenase-O major subunit                       |
| G2583_4699 | CDS        | 4771920 | 4772753 | +                | fdhD              | ApaG                                                        |
| G2583_4700 | CDS        | 4772906 | 4773961 | +                | yiiG              | hypothetical protein                                        |
| G2583_4701 | CDS        | 4774011 | 4775759 | -                | frvR              | Putative PTS system, IIA component                          |
| G2583_4702 | CDS        | 4775759 | 4776823 | -                | frvX              | Aminopeptidase                                              |
| G2583_4703 | CDS        | 4776813 | 4778270 | -                | frvB              | Phosphotransferase system, fructose-specific I IC component |
| G2583_4704 | CDS        | 4778275 | 4778721 | -                | frvA              | PTS system, fructose family, IIA component                  |
| G2583_4705 | CDS        | 4779199 | 4780593 | +                | rafY              | Glycoporin RafY                                             |
| G2583_4706 | CDS        | 4780634 | 4780948 | -                | rhaM              | L-rhamnose 1-epimerase                                      |
| G2583_4707 | CDS        | 4780958 | 4781782 | -                | rhaD              | Rhamnulose-1-phosphate aldolase                             |
| G2583_4708 | CDS        | 4782325 | 4783584 | -                | rhaA              | L-rhamnose isomerase                                        |
| G2583_4709 | CDS        | 4783581 | 4785050 | -                | rhaB              | Rhamnulokinase                                              |
| G2583_4710 | CDS        | 4785338 | 4786174 | +                | rhaS              | positive regulator for rhaBAD operon                        |
| G2583_4711 | CDS        | 4786158 | 4787096 | +                | rhaR              | positive regulator for rhaRS operon                         |
| G2583_4712 | pseudogene | 4787093 | 4788127 | -                | rhaT              | rhamnose transport                                          |
| G2583_4713 | CDS        | 4788406 | 4789032 | +                | sodA              | Superoxide dismutase                                        |
| G2583_4714 | CDS        | 4789292 | 4790275 | +                | kdgT              | 2-keto-3-deoxygluconate permease                            |
| G2583_4715 | CDS        | 4790424 | 4791098 | +                | yiiM              | MOSC domain protein                                         |
| G2583_4716 | CDS        | 4791204 | 4792577 | -                | cpxA              | two-component sensor protein                                |
| G2583_4717 | CDS        | 4792574 | 4793272 | -                | cpxR              | DNA-binding response regulator in two-component regulatory  |
| G2583_4718 | CDS        | 4793419 | 4793922 | +                | cpxP              | P pilus assembly/Cpx signaling pathway, periplasmic         |
| G2583_4719 | CDS        | 4794071 | 4794973 | +                | fieF              | Ferrous-iron efflux pump fieF                               |
| G2583_4720 | CDS        | 4795154 | 4796116 | +                | pfkA              | 6-phosphofructokinase isozyme 1                             |
| G2583_4721 | CDS        | 4796225 | 4796407 | -                | -                 | hypothetical protein                                        |
| G2583_4722 | CDS        | 4796435 | 4797424 | +                | sbp               | Sulfate-binding protein                                     |
| G2583_4723 | CDS        | 4797531 | 4798286 | +                | cdh               | CDP-diacylglycerol pyrophosphatase                          |
| G2583_4724 | CDS        | 4798341 | 4799108 | -                | tpiA              | Triosephosphate isomerase                                   |
| G2583_4725 | CDS        | 4799216 | 4799815 | -                | yiiQ              | hypothetical protein                                        |
| G2583_4726 | CDS        | 4799916 | 4800356 | +                | yiiR              | hypothetical protein                                        |
| G2583_4727 | CDS        | 4800568 | 4800867 | +                | yiiS              | hypothetical protein                                        |
| G2583_4728 | CDS        | 4800894 | 4801322 | +                | uspD              | Universal stress protein D                                  |
| G2583_4729 | CDS        | 4801327 | 4802073 | -                | fpr               | Ferredoxin--NADP(+) reductase                               |
| G2583_4730 | CDS        | 4802170 | 4803180 | -                | glpX              | Fructose-1,6-bisphosphatase, class II                       |
| G2583_4731 | CDS        | 4803410 | 4804939 | -                | glpK              | Glycerol kinase                                             |
| G2583_4732 | CDS        | 4804941 | 4805786 | -                | glpF              | glycerol uptake facilitator protein                         |

| Locus_tag  | Type  | Start   | End     | +/- <sup>a</sup> | Gene <sup>b</sup> | Product                                             |
|------------|-------|---------|---------|------------------|-------------------|-----------------------------------------------------|
| G2583_4733 | CDS   | 4806212 | 4806457 | +                | yjiU              | Cell division protein zapB                          |
| G2583_4734 | CDS   | 4806496 | 4807212 | -                | -                 | hypothetical protein                                |
| G2583_4735 | CDS   | 4807245 | 4807931 | -                | -                 | hypothetical protein                                |
| G2583_4736 | CDS   | 4807979 | 4808464 | -                | rraA              | Regulator of ribonuclease activity A                |
| G2583_4737 | CDS   | 4808557 | 4809495 | -                | menA              | 1,4-dihydroxy-2-naphthoate octaprenyltransferase    |
| G2583_4738 | CDS   | 4809550 | 4810881 | -                | hslU              | ATP-dependent hsl protease ATP-binding subunit hslU |
| G2583_4739 | CDS   | 4810891 | 4811421 | -                | hslV              | ATP-dependent protease hslV                         |
| G2583_4740 | CDS   | 4811514 | 4812473 | -                | ftsN              | Cell division protein FtsN                          |
| G2583_4741 | CDS   | 4812565 | 4813590 | -                | cytR              | Transcriptional regulators                          |
| G2583_4742 | CDS   | 4813746 | 4816016 | -                | priA              | Primosomal protein N'                               |
| G2583_4743 | CDS   | 4816147 | 4816359 | +                | rpmE              | 50S ribosomal protein L31                           |
| G2583_4744 | CDS   | 4816519 | 4820703 | +                | rhsF              | RhsH core protein with extension                    |
| G2583_4745 | CDS   | 4820705 | 4820941 | +                | -                 | hypothetical protein                                |
| G2583_4746 | CDS   | 4820994 | 4821272 | +                | insB              | hypothetical protein                                |
| G2583_4747 | CDS   | 4821305 | 4821490 | -                | -                 | IS1N transposase                                    |
| G2583_4748 | CDS   | 4821712 | 4822005 | +                | -                 | hypothetical protein                                |
| G2583_4749 | CDS   | 4821934 | 4822542 | -                | yjiX              | hypothetical protein                                |
| G2583_4750 | CDS   | 4822602 | 4822919 | -                | metJ              | MetJ                                                |
| G2583_4751 | CDS   | 4823196 | 4824356 | +                | metB              | O-succinylhomoserine (Thiol)-lyase                  |
| G2583_4752 | CDS   | 4824359 | 4826791 | +                | metL              | Aspartokinase/homoserine dehydrogenase II           |
| G2583_4753 | CDS   | 4827140 | 4828030 | +                | metF              | 5,10-methylenetetrahydrofolate reductase            |
| G2583_4754 | CDS   | 4828359 | 4830539 | +                | katG              | Peroxidase/catalase HPI                             |
| G2583_4755 | CDS   | 4830600 | 4831538 | +                | yjiE              | Hypothetical transport protein yjiE                 |
| G2583_4756 | CDS   | 4831565 | 4832182 | -                | yjiF              | hypothetical protein                                |
| G2583_4757 | CDS   | 4832456 | 4833559 | -                | gldA              | Glycerol dehydrogenase,                             |
| G2583_4758 | CDS   | 4833570 | 4834232 | -                | fsaB              | Fructose-6-phosphate aldolase 2                     |
| G2583_4759 | CDS   | 4834244 | 4836745 | -                | ptsA              | PEP-protein phosphotransferase system enzyme I      |
| G2583_4760 | CDS   | 4836381 | 4836845 | +                | yjiI              | hypothetical protein                                |
| G2583_4761 | CDS   | 4837054 | 4838133 | +                | frwC              | PTS system, fructose-like-2 IIC component           |
| G2583_4762 | CDS   | 4838148 | 4838468 | +                | frwB              | PTS system fructose-like IIB component 1            |
| G2583_4763 | CDS   | 4838519 | 4840816 | +                | pfID              | Formate C-acetyltransferase 2                       |
| G2583_4764 | CDS   | 4840782 | 4841660 | +                | pfIC              | Glycyl-radical enzyme activating protein family     |
| G2583_4765 | CDS   | 4841662 | 4842003 | +                | frwD              | Predicted enzyme IIB component of PTS               |
| G2583_4766 | CDS   | 4841990 | 4842841 | -                | yjiO              | putative ARAC-type regulatory protein               |
| G2583_4767 | CDS   | 4843056 | 4844789 | -                | yjiP              | Membrane protein                                    |
| G2583_4768 | CDS   | 4844972 | 4847623 | -                | ppc               | Phosphoenolpyruvate carboxylase                     |
| G2583_4769 | CDS   | 4847975 | 4849126 | -                | argE              | Acetylmethionine deacetylase                        |
| G2583_4770 | CDS   | 4849280 | 4850284 | +                | argC              | N-acetyl-gamma-glutamyl-phosphate reductase         |
| G2583_4771 | CDS   | 4850292 | 4851068 | +                | argB              | Acetylglutamate kinase                              |
| G2583_4772 | CDS   | 4851129 | 4852502 | +                | argH              | Argininosuccinate lyase                             |
| G2583_4773 | ncRNA | 4852564 | 4852673 | -                | oxyS              | ncRNA                                               |
| G2583_4774 | CDS   | 4852769 | 4853686 | +                | oxyR              | Transcriptional regulator                           |
| G2583_4775 | CDS   | 4853669 | 4855069 | -                | sthA              | Soluble pyridine nucleotide transhydrogenase (STH)  |
| G2583_4776 | CDS   | 4855399 | 4856565 | +                | -                 | Hippuricase                                         |
| G2583_4777 | CDS   | 4856608 | 4857924 | +                | -                 | Major facilitator superfamily                       |
| G2583_4778 | CDS   | 4857974 | 4858678 | +                | fabR              | Transcriptional regulator                           |
| G2583_4779 | CDS   | 4858678 | 4859037 | +                | yjiD              | Inner membrane protein yjiD                         |
| G2583_4780 | CDS   | 4859077 | 4860177 | -                | trmA              | tRNA (uracil-5-)-methyltransferase (tRNA(M-5-U54)-  |
| G2583_4781 | CDS   | 4860546 | 4862390 | +                | btuB              | Vitamin B12 transporter btuB precursor              |
| G2583_4782 | CDS   | 4862335 | 4863192 | +                | murl              | Glutamate racemase                                  |
| G2583_4783 | rRNA  | 4863569 | 4865110 | +                | rrsB              | 16S ribosomal RNA                                   |
| G2583_4784 | tRNA  | 4865195 | 4865272 | +                | -                 | Glu tRNA                                            |
| G2583_4785 | rRNA  | 4865465 | 4868367 | +                | rrlB              | 23S ribosomal RNA                                   |
| G2583_4786 | rRNA  | 4868462 | 4868577 | +                | rrfB              | 5S ribosomal RNA                                    |
| G2583_4787 | CDS   | 4868714 | 4869742 | +                | murB              | UDP-N-acetylenolpyruvoylglucosamine reductase       |
| G2583_4788 | CDS   | 4869739 | 4870704 | +                | birA              | Bifunctional protein BirA                           |
| G2583_4789 | CDS   | 4870733 | 4871839 | -                | coaA              | Pantothenate kinase                                 |
| G2583_4790 | CDS   | 4871870 | 4872025 | -                | -                 | hypothetical protein                                |
| G2583_4791 | tRNA  | 4872044 | 4872121 | +                | -                 | Thr tRNA                                            |
| G2583_4792 | tRNA  | 4872129 | 4872213 | +                | -                 | Tyr tRNA                                            |



| Locus_tag  | Type       | Start   | End     | +/- <sup>a</sup> | Gene <sup>b</sup> | Product                                                    |
|------------|------------|---------|---------|------------------|-------------------|------------------------------------------------------------|
| G2583_4793 | tRNA       | 4872330 | 4872404 | +                | -                 | Gly tRNA                                                   |
| G2583_4794 | tRNA       | 4872410 | 4872487 | +                | -                 | Thr tRNA                                                   |
| G2583_4795 | CDS        | 4872601 | 4873785 | +                | tufB              | Elongation factor Tu 2                                     |
| G2583_4796 | CDS        | 4874015 | 4874398 | +                | secE              | Preprotein translocase                                     |
| G2583_4797 | CDS        | 4874400 | 4874945 | +                | nusG              | Transcription antitermination protein nusG                 |
| G2583_4798 | CDS        | 4875104 | 4875532 | +                | rplK              | 50S ribosomal protein L11                                  |
| G2583_4799 | CDS        | 4875536 | 4876240 | +                | rplA              | 50S ribosomal protein L1                                   |
| G2583_4800 | CDS        | 4876532 | 4877029 | +                | rplJ              | 50S ribosomal protein L10                                  |
| G2583_4801 | CDS        | 4877096 | 4877461 | +                | rplL              | 50S ribosomal protein L7/L12                               |
| G2583_4802 | ncRNA      | 4877466 | 4877527 | +                | -                 | ncRNA                                                      |
| G2583_4803 | CDS        | 4877781 | 4881809 | +                | rpoB              | DNA-directed RNA polymerase subunit beta                   |
| G2583_4804 | CDS        | 4881886 | 4886109 | +                | rpoC              | DNA-directed RNA polymerase subunit beta'                  |
| G2583_4805 | CDS        | 4886322 | 4886765 | +                | yjaZ              | Heat shock protein C                                       |
| G2583_4806 | ncRNA      | 4886792 | 4886952 | -                | -                 | ncRNA                                                      |
| G2583_4807 | CDS        | 4887200 | 4888333 | -                | thiH              | Thiazole biosynthesis protein ThiH                         |
| G2583_4808 | CDS        | 4888330 | 4889100 | -                | thiG              | Thiamin biosynthesis, thiazole moiety                      |
| G2583_4809 | CDS        | 4889102 | 4889302 | -                | thiS              | Thiamine biosynthesis protein ThiS                         |
| G2583_4810 | CDS        | 4889286 | 4890041 | -                | thiF              | Thiazole biosynthesis adenyltransferase ThiF               |
| G2583_4811 | CDS        | 4890034 | 4890669 | -                | thiE              | Thiamine-phosphate pyrophosphorylase                       |
| G2583_4812 | CDS        | 4890669 | 4892564 | -                | thiC              | Thiamine biosynthesis protein thiC                         |
| G2583_4813 | CDS        | 4892797 | 4893273 | -                | rsd               | Regulator of sigma D                                       |
| G2583_4814 | CDS        | 4893368 | 4894141 | +                | nudC              | NADH pyrophosphatase                                       |
| G2583_4815 | CDS        | 4894181 | 4895245 | +                | hemE              | Uroporphyrinogen decarboxylase                             |
| G2583_4816 | CDS        | 4895255 | 4895926 | +                | nfi               | Endonuclease V                                             |
| G2583_4817 | CDS        | 4895969 | 4896559 | +                | yjaG              | hypothetical protein                                       |
| G2583_4818 | CDS        | 4896746 | 4897018 | +                | hupA              | DNA-binding protein HU-alpha                               |
| G2583_4819 | CDS        | 4897031 | 4897726 | +                | yjaH              | hypothetical protein                                       |
| G2583_4820 | CDS        | 4897728 | 4898294 | -                | zraP              | Zinc resistance-associated protein                         |
| G2583_4821 | CDS        | 4898391 | 4899767 | +                | zraS              | sensor protein ZraS                                        |
| G2583_4822 | CDS        | 4899764 | 4901089 | +                | zraR              | transcriptional regulatory protein ZraR                    |
| G2583_4823 | CDS        | 4901086 | 4902375 | -                | purD              | Phosphoribosylamine--glycine ligase                        |
| G2583_4824 | CDS        | 4902387 | 4903976 | -                | purH              | IMP cyclohydrolase /                                       |
| G2583_4825 | rRNA       | 4904593 | 4906134 | +                | rrsE              | 16S ribosomal RNA                                          |
| G2583_4826 | tRNA       | 4906219 | 4906296 | +                | -                 | Glu tRNA                                                   |
| G2583_4827 | rRNA       | 4906479 | 4909381 | +                | rrlE              | 23S ribosomal RNA                                          |
| G2583_4828 | rRNA       | 4909476 | 4909591 | +                | rrfE              | 5S ribosomal RNA                                           |
| G2583_4829 | CDS        | 4909708 | 4910151 | -                | -                 | hypothetical protein                                       |
| G2583_4830 | CDS        | 4910308 | 4911237 | +                | metA              | Homoserine O-succinyltransferase                           |
| G2583_4831 | CDS        | 4911506 | 4913107 | +                | aceB              | Malate synthase A                                          |
| G2583_4832 | CDS        | 4913132 | 4914451 | +                | aceA              | Isocitrate lyase                                           |
| G2583_4833 | CDS        | 4914635 | 4916371 | +                | aceK              | Isocitrate dehydrogenase kinase/phosphatase                |
| G2583_4834 | pseudogene | 4916340 | 4918525 | -                | arp               | ShET2 enterotoxin, N- region family                        |
| G2583_4835 | CDS        | 4918842 | 4919666 | -                | iclR              | Repressor of aceBA operon                                  |
| G2583_4836 | CDS        | 4919865 | 4923548 | +                | methH             | Methionine synthase                                        |
| G2583_4837 | CDS        | 4923768 | 4925399 | +                | yjbB              | hypothetical protein                                       |
| G2583_4838 | CDS        | 4925490 | 4926179 | +                | pepE              | Peptidase E                                                |
| G2583_4839 | CDS        | 4926287 | 4926442 | +                | -                 | hypothetical protein                                       |
| G2583_4840 | CDS        | 4926562 | 4927803 | -                | sorE              | Putative L-sorbose-1-P-reductase                           |
| G2583_4841 | CDS        | 4927843 | 4928667 | -                | sorM              | PTS system, mannose/fructose/sorbose family, IID component |
| G2583_4842 | CDS        | 4928678 | 4929475 | -                | sorA              | PTS system, mannose/fructose/sorbose family, IIC component |
| G2583_4843 | CDS        | 4929541 | 4930035 | -                | sorB              | Putative sorbose PTS component                             |
| G2583_4844 | CDS        | 4930035 | 4930442 | -                | sorF              | PTS system, mannose/fructose/sorbose family, IIA component |
| G2583_4845 | CDS        | 4930452 | 4931258 | -                | sorD              | Sorbitol-6-phosphate 2-dehydrogenase                       |
| G2583_4846 | CDS        | 4931328 | 4932296 | -                | -                 | Putative transcriptional regulator of sorbose uptake and   |
| G2583_4847 | CDS        | 4932623 | 4933495 | +                | rluF              | Ribosomal large subunit pseudouridine synthase F           |
| G2583_4848 | CDS        | 4933496 | 4933768 | -                | pagB              | hypothetical protein                                       |
| G2583_4849 | CDS        | 4934021 | 4935370 | -                | lysC              | Lysine-sensitive aspartokinase 3                           |
| G2583_4850 | CDS        | 4935895 | 4937544 | +                | pgi               | Glucose-6-phosphate isomerase                              |
| G2583_4851 | CDS        | 4938057 | 4938299 | +                | yjbE              | hypothetical protein                                       |
| G2583_4852 | CDS        | 4938383 | 4939051 | +                | yjbF              | hypothetical protein                                       |

| Locus_tag  | Type       | Start   | End     | +/- <sup>a</sup> | Gene <sup>b</sup> | Product                                                     |
|------------|------------|---------|---------|------------------|-------------------|-------------------------------------------------------------|
| G2583_4853 | CDS        | 4939048 | 4939785 | +                | yjbG              | hypothetical protein                                        |
| G2583_4854 | CDS        | 4939785 | 4941881 | +                | yjbH              | hypothetical protein                                        |
| G2583_4855 | CDS        | 4942476 | 4942886 | +                | psiE              | phosphate-starvation-inducible protein PsiE                 |
| G2583_4856 | CDS        | 4942930 | 4944405 | -                | xylE              | D-xylose-proton symporter                                   |
| G2583_4857 | CDS        | 4944777 | 4945667 | -                | malG              | Part of maltose permease, inner membrane                    |
| G2583_4858 | CDS        | 4945682 | 4947226 | -                | malF              | Maltose transport system permease protein malF              |
| G2583_4859 | CDS        | 4947380 | 4948570 | -                | malE              | Maltose-binding periplasmic protein precursor               |
| G2583_4860 | CDS        | 4948935 | 4950050 | +                | malK              | Maltose/maltodextrin import ATP-binding protein malK        |
| G2583_4861 | CDS        | 4950122 | 4951462 | +                | lamB              | Maltoporin precursor                                        |
| G2583_4862 | CDS        | 4951613 | 4952533 | +                | malM              | Maltose operon periplasmic protein precursor                |
| G2583_4863 | CDS        | 4952762 | 4954342 | +                | yjbl              | hypothetical protein                                        |
| G2583_4864 | CDS        | 4954565 | 4955062 | +                | ubiC              | Chorismate--pyruvate lyase                                  |
| G2583_4865 | CDS        | 4955075 | 4955947 | +                | ubiA              | 4-hydroxybenzoate octaprenyltransferase                     |
| G2583_4866 | CDS        | 4956102 | 4958585 | -                | plsB              | Glycerol-3-phosphate acyltransferase                        |
| G2583_4867 | CDS        | 4958696 | 4959064 | +                | dgkA              | Diacylglycerol kinase                                       |
| G2583_4868 | CDS        | 4959174 | 4959782 | +                | lexA              | LexA repressor                                              |
| G2583_4869 | CDS        | 4959801 | 4961180 | +                | dinF              | MATE efflux family protein                                  |
| G2583_4870 | CDS        | 4961296 | 4961505 | +                | yjbJ              | UPF0337 protein yjbJ                                        |
| G2583_4871 | CDS        | 4961547 | 4962062 | -                | zur               | Putative zinc uptake regulation protein                     |
| G2583_4872 | CDS        | 4962381 | 4963337 | +                | yjbM              | hypothetical protein                                        |
| G2583_4873 | CDS        | 4963699 | 4964736 | +                | dusA              | tRNA-dihydrouridine synthase A                              |
| G2583_4874 | CDS        | 4964870 | 4965112 | +                | pspG              | hypothetical protein                                        |
| G2583_4875 | CDS        | 4965278 | 4966261 | -                | qor               | Quinone oxidoreductase                                      |
| G2583_4876 | CDS        | 4966344 | 4967759 | +                | dnaB              | Replicative DNA helicase                                    |
| G2583_4877 | CDS        | 4967812 | 4968891 | +                | alr               | Alanine racemase, biosynthetic                              |
| G2583_4878 | CDS        | 4969144 | 4970337 | +                | tyrB              | Aromatic-amino-acid transaminase                            |
| G2583_4879 | CDS        | 4970676 | 4971074 | -                | -                 | hypothetical protein                                        |
| G2583_4880 | CDS        | 4971436 | 4972149 | +                | aphA              | Diadenosine tetraphosphatase                                |
| G2583_4881 | CDS        | 4972260 | 4972676 | +                | yjbQ              | UPF0047 protein yjbQ                                        |
| G2583_4882 | CDS        | 4972680 | 4973036 | +                | yjbR              | hypothetical protein                                        |
| G2583_4883 | CDS        | 4973071 | 4975893 | -                | uvrA              | UvrABC system protein A                                     |
| G2583_4884 | CDS        | 4976148 | 4976684 | +                | ssb               | Single-stranded DNA-binding protein                         |
| G2583_4885 | CDS        | 4976783 | 4977133 | -                | yjcB              | hypothetical protein                                        |
| G2583_4886 | CDS        | 4977493 | 4979079 | +                | yjcC              | Cyclic diguanylate phosphodiesterase (EAL) domain protein   |
| G2583_4887 | CDS        | 4979082 | 4979405 | -                | soxS              | DNA-binding transcriptional dual regulator                  |
| G2583_4888 | CDS        | 4979491 | 4979955 | +                | soxR              | Redox-sensitive transcriptional activator soxR              |
| G2583_4889 | CDS        | 4980501 | 4981850 | +                | yjcD              | Inorganic anion transporter, sulfate permease (SulP) family |
| G2583_4890 | CDS        | 4982001 | 4983650 | +                | yjcE              | Na <sup>+</sup> /H <sup>+</sup> antiporter                  |
| G2583_4891 | CDS        | 4983804 | 4985096 | -                | yjcF              | hypothetical protein                                        |
| G2583_4892 | CDS        | 4985277 | 4986926 | -                | actP              | Cation/acetate symporter actP                               |
| G2583_4893 | CDS        | 4986923 | 4987237 | -                | yjcH              | hypothetical protein                                        |
| G2583_4894 | CDS        | 4987438 | 4989396 | -                | acs               | Acetyl-coenzyme A synthetase                                |
| G2583_4895 | CDS        | 4989789 | 4991225 | +                | nrfA              | Cytochrome c-552 precursor                                  |
| G2583_4896 | CDS        | 4991264 | 4991836 | +                | nrfB              | NrfB, formate-dependent nitrite reductase                   |
| G2583_4897 | CDS        | 4991833 | 4992504 | +                | nrfC              | formate-dependent nitrite reductase; Fe-S centers           |
| G2583_4898 | CDS        | 4992501 | 4993457 | +                | nrfD              | NrfD protein                                                |
| G2583_4899 | CDS        | 4993537 | 4995195 | +                | nrfE              | Cytochrome c-type biogenesis protein NrfE                   |
| G2583_4900 | CDS        | 4995188 | 4995571 | +                | nrfF              | Formate-dependent nitrite reductase complex subunit nrfF    |
| G2583_4901 | CDS        | 4995568 | 4996164 | +                | nrfG              | Formate-dependent nitrite reductase complex NrfG subunit    |
| G2583_4902 | CDS        | 4996506 | 4997819 | +                | gltP              | Sodium:dicarboxylate symporter                              |
| G2583_4903 | CDS        | 4997997 | 4998686 | -                | yjcO              | hypothetical protein                                        |
| G2583_4904 | pseudogene | 4998780 | 5000927 | -                | fdhF              | selenopolypeptide subunit of formate dehydrogenase H        |
| G2583_4905 | CDS        | 5001125 | 5002591 | -                | mdtP              | Multidrug resistance outer membrane protein mdtP precursor  |
| G2583_4906 | CDS        | 5002588 | 5004639 | -                | mdtO              | Multidrug resistance protein mdtO                           |
| G2583_4907 | pseudogene | 5004639 | 5005670 | -                | mdtN              | multidrug resistance protein MdtN                           |
| G2583_4908 | CDS        | 5005689 | 5005964 | -                | ytcA              | hypothetical protein                                        |
| G2583_4909 | CDS        | 5006173 | 5008170 | -                | yjcS              | hypothetical protein                                        |
| G2583_4910 | CDS        | 5008431 | 5009156 | +                | -                 | Putative transcriptional regulator                          |
| G2583_4911 | CDS        | 5009153 | 5010154 | -                | PfkB              | PfkB domain protein                                         |
| G2583_4912 | CDS        | 5010151 | 5011011 | -                | -                 | Fructose-bisphosphate aldolase                              |

| Locus_tag  | Type       | Start   | End     | +/- <sup>a</sup> | Gene <sup>b</sup> | Product                                                      |
|------------|------------|---------|---------|------------------|-------------------|--------------------------------------------------------------|
| G2583_4913 | CDS        | 5011026 | 5011709 | -                | -                 | hypothetical protein                                         |
| G2583_4914 | CDS        | 5011764 | 5012705 | -                | -                 | Putative periplasmic ribose-binding protein of ABC transport |
| G2583_4915 | CDS        | 5012724 | 5013698 | -                | -                 | Putative permease of ribose ABC transport system             |
| G2583_4916 | CDS        | 5013695 | 5015248 | -                | -                 | Ribose import ATP-binding protein rbsA 2                     |
| G2583_4917 | CDS        | 5015233 | 5017590 | +                | -                 | Integral membrane sensor hybrid histidine kinase             |
| G2583_4918 | CDS        | 5017659 | 5017988 | +                | yjdP              | hypothetical protein                                         |
| G2583_4919 | CDS        | 5018065 | 5018823 | -                | phnP              | Phosphonate utilization protein                              |
| G2583_4920 | CDS        | 5018825 | 5019259 | -                | phnO              | predicted acyltransferase with acyl-CoA N-acyltransferase    |
| G2583_4921 | CDS        | 5019246 | 5019803 | -                | phnN              | Phosphonate metabolism protein/1,5-bisphosphokinase (PRPP-   |
| G2583_4922 | CDS        | 5019803 | 5020939 | -                | phnM              | Phosphonate metabolism protein PhnM                          |
| G2583_4923 | CDS        | 5020936 | 5021616 | -                | phnL              | Phosphonate C-P lyase system protein PhnL                    |
| G2583_4924 | CDS        | 5021727 | 5022485 | -                | phnK              | Phosphonate C-P lyase system protein PhnK                    |
| G2583_4925 | CDS        | 5022482 | 5023327 | -                | phnJ              | PhnJ protein                                                 |
| G2583_4926 | CDS        | 5023320 | 5024384 | -                | phnI              | Phosphonate metabolism protein PhnI                          |
| G2583_4927 | CDS        | 5024384 | 5024968 | -                | phnH              | Bacterial phosphonate metabolism protein PhnH                |
| G2583_4928 | CDS        | 5024965 | 5025417 | -                | phnG              | Phosphonate C-P lyase system protein PhnG                    |
| G2583_4929 | CDS        | 5025418 | 5026143 | -                | phnF              | Phosphonates metabolism transcriptional regulator PhnF       |
| G2583_4930 | CDS        | 5026164 | 5026994 | -                | phnE              | Phosphonate ABC transporter, permease protein                |
| G2583_4931 | CDS        | 5027049 | 5028065 | -                | phnD              | Phosphonate ABC transporter, periplasmic phosphonate-        |
| G2583_4932 | CDS        | 5028090 | 5028878 | -                | phnC              | Phosphonates import ATP-binding protein phnC                 |
| G2583_4933 | CDS        | 5029011 | 5029454 | -                | yjdN              | Putative phnB protein                                        |
| G2583_4934 | CDS        | 5029613 | 5030026 | -                | yjdM              | Alkylphosphonate utilization operon protein PhnA             |
| G2583_4935 | CDS        | 5030350 | 5032578 | +                | yjdA              | hypothetical protein                                         |
| G2583_4936 | CDS        | 5032575 | 5033453 | +                | yjcZ              | hypothetical protein                                         |
| G2583_4937 | CDS        | 5033717 | 5035219 | +                | proP              | Proline/betaine transporter                                  |
| G2583_4938 | CDS        | 5035396 | 5036496 | -                | basS              | Sensor histidine kinase BasS                                 |
| G2583_4939 | CDS        | 5036497 | 5037165 | -                | basR              | DNA-binding response regulator BasR                          |
| G2583_4940 | CDS        | 5037162 | 5038835 | -                | eptA              | Putative sulfatase                                           |
| G2583_4941 | CDS        | 5038909 | 5040246 | -                | adiC              | Putative amino acid permease                                 |
| G2583_4942 | CDS        | 5040383 | 5041144 | -                | adiY              | putative ARAC-type regulatory protein                        |
| G2583_4943 | CDS        | 5041469 | 5043739 | -                | adiA              | Biodegradative arginine decarboxylase                        |
| G2583_4944 | CDS        | 5043935 | 5044843 | -                | melR              | Melibiose operon regulatory protein                          |
| G2583_4945 | CDS        | 5045126 | 5046481 | +                | melA              | Alpha-galactosidase                                          |
| G2583_4946 | CDS        | 5046596 | 5048005 | +                | melB              | Melibiose carrier protein                                    |
| G2583_4947 | CDS        | 5048144 | 5048773 | -                | yjdF              | hypothetical protein                                         |
| G2583_4948 | CDS        | 5048896 | 5050542 | -                | fumB              | Fumarase B                                                   |
| G2583_4949 | CDS        | 5050620 | 5051960 | -                | dcuB              | Anaerobic C4-dicarboxylate transporter DcuB                  |
| G2583_4950 | CDS        | 5052531 | 5053250 | -                | dcuR              | DNA-binding response regulator in two-component regulatory   |
| G2583_4951 | CDS        | 5053247 | 5054878 | -                | dcuS              | sensory histidine kinase DcuS                                |
| G2583_4952 | CDS        | 5055059 | 5055289 | +                | yjdI              | hypothetical protein                                         |
| G2583_4953 | CDS        | 5055301 | 5055573 | +                | yjdJ              | hypothetical protein                                         |
| G2583_4954 | CDS        | 5055800 | 5056096 | +                | yjdK              | hypothetical protein                                         |
| G2583_4955 | CDS        | 5056124 | 5056297 | +                | yjdO              | hypothetical protein                                         |
| G2583_4956 | CDS        | 5056416 | 5057933 | -                | lysU              | Lysyl-tRNA synthetase, heat inducible                        |
| G2583_4957 | CDS        | 5058170 | 5059627 | -                | yjdL              | Amino acid/peptide transporter                               |
| G2583_4958 | CDS        | 5059686 | 5061833 | -                | cadA              | Lysine decarboxylase, inducible                              |
| G2583_4959 | CDS        | 5061913 | 5063247 | -                | cadB              | Probable cadaverine/lysine antiporter                        |
| G2583_4960 | CDS        | 5063613 | 5065151 | -                | cadC              | Transcriptional activator cadC                               |
| G2583_4961 | tRNA       | 5065767 | 5065844 | -                | -                 | Phe tRNA                                                     |
| G2583_4962 | CDS        | 5065950 | 5066549 | -                | yjdC              | YjdC                                                         |
| G2583_4963 | CDS        | 5066562 | 5068259 | -                | dipZ              | Thiol:disulfide interchange protein DsbD                     |
| G2583_4964 | CDS        | 5068235 | 5068573 | -                | cutA              | Divalent-cation tolerance protein cutA                       |
| G2583_4965 | CDS        | 5068689 | 5069897 | -                | dcuA              | Anaerobic C4-dicarboxylate transporter dcuA                  |
| G2583_4966 | CDS        | 5070108 | 5071589 | -                | aspA              | aspartate ammonia-lyase                                      |
| G2583_4967 | CDS        | 5071881 | 5072357 | +                | fxsA              | FxsA                                                         |
| G2583_4968 | CDS        | 5072373 | 5073629 | -                | yjeH              | Amino acid-polyamine-organocation (APC) permease family      |
| G2583_4969 | CDS        | 5073905 | 5074198 | +                | groS              | hypothetical protein                                         |
| G2583_4970 | CDS        | 5074242 | 5075888 | +                | groL              | 60 kDa chaperonin 1                                          |
| G2583_4971 | CDS        | 5075993 | 5076379 | +                | yjeI              | hypothetical protein                                         |
| G2583_4972 | pseudogene | 5076572 | 5077099 | -                | yjeJ              | conserved hypothetical protein                               |

| Locus_tag  | Type | Start   | End     | +/- <sup>a</sup> | Gene <sup>b</sup> | Product                                                      |
|------------|------|---------|---------|------------------|-------------------|--------------------------------------------------------------|
| G2583_4973 | CDS  | 5077320 | 5078348 | -                | yjeK              | KamA family protein                                          |
| G2583_4974 | CDS  | 5078390 | 5078956 | +                | efp               | Elongation factor P                                          |
| G2583_4975 | CDS  | 5079008 | 5079133 | +                | ecnA              | Predicted small secreted protein                             |
| G2583_4976 | CDS  | 5079244 | 5079390 | +                | ecnB              | Entericidin B                                                |
| G2583_4977 | CDS  | 5079416 | 5079883 | +                | sugE              | SugE                                                         |
| G2583_4978 | CDS  | 5079880 | 5080413 | -                | blc               | Outer membrane lipoprotein blc precursor                     |
| G2583_4979 | CDS  | 5080501 | 5081634 | -                | ampC              | Beta-lactamase                                               |
| G2583_4980 | CDS  | 5081697 | 5082056 | -                | frdD              | Fumarate reductase subunit D                                 |
| G2583_4981 | CDS  | 5082067 | 5082462 | -                | frdC              | Fumarate reductase subunit C                                 |
| G2583_4982 | CDS  | 5082473 | 5083207 | -                | frdB              | Fumarate reductase iron-sulfur subunit                       |
| G2583_4983 | CDS  | 5083200 | 5085008 | -                | frdA              | Fumarate reductase, anaerobic, flavoprotein subunit          |
| G2583_4984 | CDS  | 5085333 | 5086310 | +                | poxA              | Putative lysyl-tRNA synthetase                               |
| G2583_4985 | CDS  | 5086487 | 5088031 | +                | yjeM              | Hypothetical transporter YjeM                                |
| G2583_4986 | CDS  | 5088182 | 5091505 | -                | yjeP              | Mechanosensitive ion channel family protein                  |
| G2583_4987 | CDS  | 5091527 | 5092495 | -                | psd               | Phosphatidylserine decarboxylase proenzyme                   |
| G2583_4988 | CDS  | 5092592 | 5093644 | -                | rsgA              | Probable GTPase engC precursor                               |
| G2583_4989 | CDS  | 5093739 | 5094284 | +                | orn               | Oligoribonuclease                                            |
| G2583_4990 | tRNA | 5094495 | 5094570 | +                | -                 | Gly tRNA                                                     |
| G2583_4991 | tRNA | 5094606 | 5094683 | +                | -                 | Gly tRNA                                                     |
| G2583_4992 | tRNA | 5094717 | 5094794 | +                | -                 | Gly tRNA                                                     |
| G2583_4993 | CDS  | 5095063 | 5096202 | -                | yjeS              | hypothetical protein                                         |
| G2583_4994 | CDS  | 5096201 | 5097748 | +                | yjeF              | hypothetical protein                                         |
| G2583_4995 | CDS  | 5097720 | 5098181 | +                | yjeE              | UPF0079 ATP-binding protein yjeE                             |
| G2583_4996 | CDS  | 5098200 | 5099537 | +                | amiB              | N-acetylmuramoyl-L-alanine amidase AmiB                      |
| G2583_4997 | CDS  | 5099547 | 5101394 | +                | mutL              | DNA mismatch repair protein MutL                             |
| G2583_4998 | CDS  | 5101387 | 5102337 | +                | miaA              | tRNA delta(2)-isopentenylpyrophosphate transferase           |
| G2583_4999 | CDS  | 5102423 | 5102731 | +                | hfq               | RNA-binding protein Hfq                                      |
| G2583_5000 | CDS  | 5102808 | 5104088 | +                | hflX              | GTP-binding protein HflX                                     |
| G2583_5001 | CDS  | 5104174 | 5105433 | +                | hflK              | FtsH protease regulator HflK                                 |
| G2583_5002 | CDS  | 5105436 | 5106440 | +                | hflC              | FtsH protease regulator HflC                                 |
| G2583_5003 | CDS  | 5106522 | 5106719 | +                | yjeT              | hypothetical protein                                         |
| G2583_5004 | CDS  | 5106823 | 5108121 | +                | purA              | Adenylosuccinate synthetase                                  |
| G2583_5005 | CDS  | 5108326 | 5108751 | +                | nsrR              | transcriptional repressor NsrR                               |
| G2583_5006 | CDS  | 5108790 | 5111231 | +                | mrn               | Putative enzyme                                              |
| G2583_5007 | CDS  | 5111412 | 5112143 | +                | rlmB              | 23S rRNA (guanosine-2'-O-)-methyltransferase rlmB            |
| G2583_5008 | CDS  | 5112270 | 5112671 | +                | yjfl              | hypothetical protein                                         |
| G2583_5009 | CDS  | 5112690 | 5113388 | +                | yjfJ              | PspA/IM30 family protein                                     |
| G2583_5010 | CDS  | 5113439 | 5114098 | +                | yjfK              | hypothetical protein                                         |
| G2583_5011 | CDS  | 5114116 | 5114514 | +                | yjfl              | hypothetical protein                                         |
| G2583_5012 | CDS  | 5114524 | 5115162 | +                | yjfm              | hypothetical protein                                         |
| G2583_5013 | CDS  | 5115165 | 5116328 | +                | yjfC              | Glutathionylspermidine synthase domain protein               |
| G2583_5014 | CDS  | 5116397 | 5118037 | +                | aidB              | Putative acyl coenzyme A dehydrogenase                       |
| G2583_5015 | CDS  | 5118154 | 5118456 | -                | yjfN              | hypothetical protein                                         |
| G2583_5016 | CDS  | 5118578 | 5118907 | -                | yjfO              | hypothetical protein                                         |
| G2583_5017 | CDS  | 5119089 | 5119838 | +                | yjfP              | Esterase yjfP                                                |
| G2583_5018 | CDS  | 5119835 | 5120590 | -                | ulaR              | putative DEOR-type transcriptional regulator                 |
| G2583_5019 | CDS  | 5120698 | 5121768 | -                | ulaG              | Predicted Zn-dependent hydrolases of the beta-lactamase fold |
| G2583_5020 | CDS  | 5122117 | 5123514 | +                | ulaA              | ascorbate-specific PTS system enzyme IIC                     |
| G2583_5021 | CDS  | 5123530 | 5123835 | +                | ulaB              | Ascorbate-specific phosphotransferase enzyme IIB component   |
| G2583_5022 | CDS  | 5123845 | 5124309 | +                | ulaC              | Ascorbate-specific phosphotransferase enzyme IIA component   |
| G2583_5023 | CDS  | 5124323 | 5124973 | +                | ulaD              | Putative hexulose-6-phosphate synthase                       |
| G2583_5024 | CDS  | 5124983 | 5125837 | +                | ulaE              | L-ribulose-5-phosphate 3-epimerase ulaE                      |
| G2583_5025 | CDS  | 5125789 | 5126523 | +                | ulaF              | L-ribulose-5-phosphate 4-epimerase ulaF                      |
| G2583_5026 | CDS  | 5126652 | 5126927 | -                | yjfY              | UPF0379 protein yjfY precursor                               |
| G2583_5027 | CDS  | 5127254 | 5127649 | +                | rpsF              | Ribosomal protein S6                                         |
| G2583_5028 | CDS  | 5127656 | 5127970 | +                | priB              | Primosomal replication protein n                             |
| G2583_5029 | CDS  | 5127975 | 5128202 | +                | rpsR              | 30S ribosomal protein S18                                    |
| G2583_5030 | CDS  | 5128244 | 5128693 | +                | rpII              | 50S ribosomal protein L9                                     |
| G2583_5031 | CDS  | 5128764 | 5129558 | -                | yjfZ              | hypothetical protein                                         |
| G2583_5033 | CDS  | 5129998 | 5130180 | -                | -                 | hypothetical protein                                         |

| Locus_tag  | Type | Start   | End     | +/- <sup>a</sup> | Gene <sup>b</sup> | Product                                                    |
|------------|------|---------|---------|------------------|-------------------|------------------------------------------------------------|
| G2583_5034 | CDS  | 5130181 | 5130612 | -                | -                 | Transposase, family                                        |
| G2583_5035 | CDS  | 5130620 | 5131828 | +                | ydcM              | IS605 family transposase orfB                              |
| G2583_5036 | CDS  | 5131963 | 5132637 | -                | ytfB              | hypothetical protein                                       |
| G2583_5037 | CDS  | 5132819 | 5133439 | +                | fkIB              | Peptidyl-prolyl cis-trans isomerase                        |
| G2583_5038 | CDS  | 5133748 | 5135160 | +                | cycA              | D-serine/D-alanine/glycine transporter                     |
| G2583_5039 | CDS  | 5135205 | 5135867 | -                | ytfE              | Regulator of cell morphogenesis and NO signaling           |
| G2583_5040 | CDS  | 5135975 | 5136949 | -                | ytfF              | Putative transmembrane subunit                             |
| G2583_5041 | CDS  | 5137048 | 5137908 | -                | ytfG              | NmrA family protein                                        |
| G2583_5042 | CDS  | 5137907 | 5138377 | +                | ytfH              | hypothetical protein                                       |
| G2583_5043 | CDS  | 5138495 | 5140438 | -                | cpdB              | 2',3'-cyclic-nucleotide 2'-phosphodiesterase               |
| G2583_5044 | CDS  | 5140628 | 5141368 | +                | cysQ              | PAPS (adenosine 3'-phosphate 5'-phosphosulfate) 3'(2'),5'- |
| G2583_5045 | CDS  | 5141580 | 5142518 | +                | ytfI              | hypothetical protein                                       |
| G2583_5046 | CDS  | 5142581 | 5143135 | -                | ytfJ              | hypothetical protein                                       |
| G2583_5047 | CDS  | 5143421 | 5143666 | +                | ytfK              | hypothetical protein                                       |
| G2583_5048 | CDS  | 5143745 | 5145088 | -                | ytfL              | UPF0053 inner membrane protein ytfL                        |
| G2583_5049 | CDS  | 5145411 | 5146049 | -                | msrA              | Peptide methionine sulfoxide reductase msrA (Protein-      |
| G2583_5050 | CDS  | 5146255 | 5147988 | +                | ytfM              | hypothetical protein                                       |
| G2583_5051 | CDS  | 5147985 | 5151764 | +                | ytfN              | hypothetical protein                                       |
| G2583_5052 | CDS  | 5151767 | 5152108 | +                | ytfP              | UPF0131 protein ytfP                                       |
| G2583_5053 | CDS  | 5151849 | 5152118 | -                | yzfA              | Ile repressor (ileR)                                       |
| G2583_5054 | CDS  | 5152314 | 5152571 | +                | chpS              | PemI protein 2                                             |
| G2583_5055 | CDS  | 5152565 | 5152915 | +                | chpB              | PemK protein 2                                             |
| G2583_5056 | CDS  | 5152995 | 5153525 | -                | ppa               | Inorganic pyrophosphatase                                  |
| G2583_5057 | CDS  | 5153835 | 5154791 | +                | ytfQ              | Putative sugar ABC transporter, periplasmic sugar-binding  |
| G2583_5058 | CDS  | 5154931 | 5156433 | +                | ytfR              | Uncharacterized ABC transporter ATP-binding protein ytfR   |
| G2583_5059 | CDS  | 5156444 | 5157469 | +                | ytfT              | Putative transport system permease protein                 |
| G2583_5060 | CDS  | 5157456 | 5158451 | +                | yjfF              | Putative sugar ABC transporter, permease protein           |
| G2583_5061 | CDS  | 5158484 | 5159482 | -                | fbp               | Fructose-1,6-bisphosphatase                                |
| G2583_5062 | CDS  | 5159658 | 5161031 | +                | mpl               | UDP-N-acetylmuramate:L-alanyl-gamma-D-glutamyl-meso-       |
| G2583_5063 | CDS  | 5161187 | 5161738 | -                | yjgA              | UPF0307 protein yjgA                                       |
| G2583_5064 | CDS  | 5161832 | 5163184 | +                | pmbA              | Putative peptide maturation protein                        |
| G2583_5065 | CDS  | 5163452 | 5163754 | +                | cybC              | Soluble cytochrome b562 precursor                          |
| G2583_5066 | CDS  | 5163799 | 5164263 | -                | nrdG              | Anaerobic ribonucleoside-triphosphate reductase-activating |
| G2583_5067 | CDS  | 5164453 | 5166591 | -                | nrdD              | Anaerobic ribonucleoside-triphosphate reductase            |
| G2583_5068 | CDS  | 5166985 | 5168640 | -                | treC              | Trehalase 6-P hydrolase                                    |
| G2583_5069 | CDS  | 5168690 | 5170111 | -                | treB              | PTS system, trehalose-specific IIBC component              |
| G2583_5070 | CDS  | 5170230 | 5171177 | -                | treR              | Trehalose operon repressor                                 |
| G2583_5071 | CDS  | 5171182 | 5171415 | +                | -                 | hypothetical protein                                       |
| G2583_5072 | CDS  | 5171556 | 5174252 | +                | mgtA              | Magnesium-transporting ATPase, P-type 1                    |
| G2583_5073 | CDS  | 5174458 | 5174883 | -                | yjgF              | hypothetical protein                                       |
| G2583_5074 | CDS  | 5174917 | 5175378 | -                | pyrI              | Aspartate carbamoyltransferase regulatory chain            |
| G2583_5075 | CDS  | 5175391 | 5176326 | -                | pyrB              | Aspartate carbamoyltransferase                             |
| G2583_5076 | CDS  | 5176330 | 5176464 | -                | pyrL              | PyrBI operon leader peptide                                |
| G2583_5077 | CDS  | 5176444 | 5176566 | +                | yjgG              | hypothetical protein                                       |
| G2583_5078 | CDS  | 5176594 | 5176776 | +                | -                 | hypothetical protein                                       |
| G2583_5079 | CDS  | 5176745 | 5177140 | -                | yjgH              | Endoribonuclease L-PSP family protein                      |
| G2583_5080 | CDS  | 5177271 | 5177984 | -                | yjgI              | Oxidoreductase, short chain dehydrogenase/reductase family |
| G2583_5081 | CDS  | 5178055 | 5178648 | +                | yjgJ              | hypothetical protein                                       |
| G2583_5082 | CDS  | 5178784 | 5179245 | +                | yjgK              | hypothetical protein                                       |
| G2583_5083 | CDS  | 5179368 | 5181248 | +                | yjgL              | hypothetical protein                                       |
| G2583_5084 | CDS  | 5181305 | 5182309 | -                | argI              | Ornithine carbamoyltransferase                             |
| G2583_5085 | CDS  | 5182471 | 5182887 | +                | rraB              | hypothetical protein                                       |
| G2583_5086 | CDS  | 5182933 | 5183436 | -                | yjgM              | Acetyltransferase, GNAT family                             |
| G2583_5087 | CDS  | 5183602 | 5184825 | +                | yjgN              | hypothetical protein                                       |
| G2583_5088 | CDS  | 5184880 | 5187735 | -                | valS              | Valyl-tRNA synthetase                                      |
| G2583_5089 | CDS  | 5187735 | 5188178 | -                | holC              | DNA polymerase III, chi subunit                            |
| G2583_5090 | CDS  | 5188532 | 5190043 | -                | pepA              | Cytosol aminopeptidase                                     |
| G2583_5091 | CDS  | 5190310 | 5191410 | +                | yjgP              | Inner membrane protein yjgP                                |
| G2583_5092 | CDS  | 5191407 | 5192492 | +                | yjgQ              | Inner membrane protein yjgQ                                |
| G2583_5093 | CDS  | 5192653 | 5194155 | -                | yjgR              | hypothetical protein                                       |

| Locus_tag  | Type       | Start   | End     | +/- <sup>a</sup> | Gene <sup>b</sup> | Product                                                          |
|------------|------------|---------|---------|------------------|-------------------|------------------------------------------------------------------|
| G2583_5094 | CDS        | 5194285 | 5195346 | -                | yjgB              | Alcohol dehydrogenase                                            |
| G2583_5095 | tRNA       | 5195499 | 5195585 | +                | -                 | Leu tRNA                                                         |
| G2583_5096 | CDS        | 5195707 | 5196612 | +                | -                 | Prophage P4 integrase                                            |
| G2583_5097 | CDS        | 5196672 | 5196839 | +                | -                 | hypothetical protein                                             |
| G2583_5098 | CDS        | 5197072 | 5197956 | -                | -                 | hypothetical protein                                             |
| G2583_5099 | CDS        | 5197910 | 5198236 | -                | yjhT              | N-acetylneuraminase epimerase 2                                  |
| G2583_5100 | CDS        | 5198464 | 5199567 | -                | -                 | hypothetical protein                                             |
| G2583_5101 | CDS        | 5199571 | 5200278 | -                | -                 | hypothetical protein                                             |
| G2583_5102 | CDS        | 5200285 | 5201937 | -                | -                 | hypothetical protein                                             |
| G2583_5103 | CDS        | 5202149 | 5205508 | +                | -                 | hypothetical protein                                             |
| G2583_5104 | CDS        | 5205508 | 5211822 | +                | -                 | hypothetical protein                                             |
| G2583_5105 | CDS        | 5212046 | 5214904 | +                | -                 | Helicase family protein                                          |
| G2583_5106 | CDS        | 5214907 | 5219841 | +                | -                 | hypothetical protein                                             |
| G2583_5107 | CDS        | 5219841 | 5226182 | +                | -                 | DEAD/DEAH box helicase domain protein                            |
| G2583_5108 | CDS        | 5226179 | 5228293 | +                | -                 | ATP-dependent DNA helicase, UvrD/REP family                      |
| G2583_5109 | pseudogene | 5229246 | 5229664 | -                | -                 | hypothetical protein                                             |
| G2583_5110 | CDS        | 5229787 | 5230767 | -                | yjhS              | hypothetical protein                                             |
| G2583_5111 | CDS        | 5230832 | 5232046 | -                | yjhT              | N-acetylneuraminase-epimerase precursor                          |
| G2583_5112 | CDS        | 5231958 | 5232683 | -                | nanC              | hypothetical protein                                             |
| G2583_5113 | CDS        | 5234130 | 5234732 | +                | fimB              | Type 1 fimbriae regulatory protein fimB                          |
| G2583_5114 | CDS        | 5235210 | 5235806 | +                | fimE              | Type 1 fimbriae regulatory protein FimE                          |
| G2583_5115 | CDS        | 5236287 | 5236835 | +                | fimA              | Major type 1 subunit fimbrin                                     |
| G2583_5116 | CDS        | 5236792 | 5237439 | +                | fimI              | FimI fimbrial protein                                            |
| G2583_5117 | CDS        | 5237476 | 5238201 | +                | fimC              | Chaperone protein FimC                                           |
| G2583_5118 | CDS        | 5238268 | 5240904 | +                | fimD              | Export and assembly outer membrane protein of type 1 fimbriae    |
| G2583_5119 | CDS        | 5240914 | 5241444 | +                | fimF              | Fimbrial protein FimF                                            |
| G2583_5120 | CDS        | 5241457 | 5241960 | +                | fimG              | FimG                                                             |
| G2583_5121 | CDS        | 5241980 | 5242882 | +                | fimH              | Adhesin                                                          |
| G2583_5122 | CDS        | 5243056 | 5244399 | -                | gntP              | High-affinity gluconate transporter                              |
| G2583_5123 | CDS        | 5244739 | 5245923 | +                | uxuA              | D-mannonate dehydratase                                          |
| G2583_5124 | CDS        | 5246004 | 5247464 | +                | uxuB              | Fructuronate reductase                                           |
| G2583_5125 | CDS        | 5247679 | 5248452 | +                | uxuR              | DNA-binding transcriptional repressor                            |
| G2583_5126 | CDS        | 5248593 | 5249423 | -                | yjiC              | hypothetical protein                                             |
| G2583_5127 | CDS        | 5249757 | 5249900 | +                | -                 | hypothetical protein                                             |
| G2583_5128 | CDS        | 5250087 | 5250488 | +                | yjiD              | Anti-adapter protein iraD                                        |
| G2583_5129 | CDS        | 5250481 | 5251224 | -                | yjiE              | transcriptional regulator, LysR family                           |
| G2583_5130 | CDS        | 5251457 | 5252629 | -                | iadA              | Beta-aspartyl peptidase                                          |
| G2583_5131 | CDS        | 5252642 | 5253103 | -                | yjiG              | putative membrane protein                                        |
| G2583_5132 | CDS        | 5253100 | 5253795 | -                | yjiH              | hypothetical protein                                             |
| G2583_5133 | CDS        | 5253931 | 5254584 | +                | yjiI              | Putative uncharacterized protein yjiI                            |
| G2583_5134 | CDS        | 5254741 | 5259981 | -                | yeeJ              | Putative invasin                                                 |
| G2583_5135 | CDS        | 5260192 | 5261370 | -                | yjiJ              | Transporter, major facilitator family                            |
| G2583_5136 | CDS        | 5261438 | 5262427 | -                | yjiK              | SdiA-regulated protein                                           |
| G2583_5137 | CDS        | 5262546 | 5264759 | -                | -                 | hypothetical protein                                             |
| G2583_5138 | CDS        | 5265071 | 5265337 | -                | -                 | hypothetical protein                                             |
| G2583_5139 | CDS        | 5265454 | 5266101 | -                | yjiL              | (R)-2-hydroxyglutaryl-CoA dehydratase activator                  |
| G2583_5140 | CDS        | 5266111 | 5267283 | -                | yjiM              | hypothetical protein                                             |
| G2583_5141 | CDS        | 5267378 | 5268658 | -                | yjiN              | conserved hypothetical protein                                   |
| G2583_5142 | CDS        | 5268699 | 5269931 | -                | mdtM              | Multidrug resistance protein mdtM                                |
| G2583_5143 | CDS        | 5270398 | 5271330 | +                | yjiP              | hypothetical protein                                             |
| G2583_5144 | CDS        | 5271573 | 5272985 | -                | yjiR              | transcriptional regulator, GntR family/aminotransferase, classes |
| G2583_5145 | CDS        | 5273162 | 5273326 | +                | yjiS              | YjiS                                                             |
| G2583_5146 | pseudogene | 5273423 | 5275516 | +                | -                 | hypothetical protein                                             |
| G2583_5147 | CDS        | 5275563 | 5275904 | -                | yjiW              | HSP20-like domain protein                                        |
| G2583_5148 | CDS        | 5276125 | 5277879 | -                | hsdS              | Putative type I restriction-modification system, S subunit       |
| G2583_5149 | CDS        | 5277879 | 5279360 | -                | hsdM              | Type I restriction-modification system, M subunit                |
| G2583_5150 | CDS        | 5279415 | 5281847 | -                | hsdR              | Type I restriction-modification system, R subunit                |
| G2583_5151 | CDS        | 5282125 | 5282409 | +                | -                 | protein of unknown function DUF262                               |
| G2583_5152 | pseudogene | 5282125 | 5283776 | +                | orf               | protein of unknown function DUF262                               |
| G2583_5153 | CDS        | 5283845 | 5284801 | -                | yjiA              | Putative GTPase                                                  |

| Locus_tag  | Type | Start   | End     | +/- <sup>a</sup> | Gene <sup>b</sup> | Product                                                 |
|------------|------|---------|---------|------------------|-------------------|---------------------------------------------------------|
| G2583_5154 | CDS  | 5284812 | 5285015 | -                | yjiX              | hypothetical protein                                    |
| G2583_5155 | CDS  | 5285065 | 5287230 | -                | yjiY              | Carbon starvation family protein                        |
| G2583_5156 | CDS  | 5287508 | 5288050 | -                | -                 | hypothetical protein                                    |
| G2583_5157 | CDS  | 5288279 | 5289943 | +                | tsr               | Methyl-accepting chemotaxis protein I                   |
| G2583_5158 | CDS  | 5289992 | 5291353 | -                | yjjL              | Transporter, major facilitator family                   |
| G2583_5159 | CDS  | 5291568 | 5292482 | -                | yjjM              | transcriptional regulator, GntR family                  |
| G2583_5160 | CDS  | 5292606 | 5293643 | +                | yjjN              | Putative oxidoreductase                                 |
| G2583_5161 | CDS  | 5293780 | 5296071 | -                | mdoB              | Phosphoglycerol transferase I                           |
| G2583_5162 | CDS  | 5296325 | 5296822 | -                | yjiA              | hypothetical protein                                    |
| G2583_5163 | CDS  | 5296868 | 5297605 | -                | dnaC              | DNA replication protein DnaC                            |
| G2583_5164 | CDS  | 5297608 | 5298147 | -                | dnaT              | Primosomal protein 1                                    |
| G2583_5165 | CDS  | 5298254 | 5298727 | -                | yjjB              | Uncharacterized conserved protein                       |
| G2583_5166 | CDS  | 5298718 | 5299551 | -                | yjjP              | putative structural protein                             |
| G2583_5167 | CDS  | 5300109 | 5300834 | +                | yjjQ              | hypothetical protein                                    |
| G2583_5168 | CDS  | 5300792 | 5301469 | +                | bglJ              | transcriptional regulator, LuxR family                  |
| G2583_5169 | CDS  | 5301507 | 5302295 | -                | fhuF              | Ferric iron reductase protein FhuF                      |
| G2583_5170 | CDS  | 5302397 | 5302672 | +                | yjiZ              | hypothetical protein                                    |
| G2583_5171 | tRNA | 5302710 | 5302798 | -                | -                 | Leu tRNA                                                |
| G2583_5277 | tRNA | 5302832 | 5302918 | -                | -                 | Leu tRNA                                                |
| G2583_5278 | tRNA | 5302947 | 5303033 | -                | -                 | Leu tRNA                                                |
| G2583_5172 | CDS  | 5303223 | 5304254 | -                | rsmC              | 16S RNA G1207 methylase RsmC                            |
| G2583_5173 | CDS  | 5304357 | 5304770 | +                | hoID              | DNA polymerase III, psi subunit                         |
| G2583_5174 | CDS  | 5304739 | 5305185 | +                | rimI              | Ribosomal-protein-alanine acetyltransferase             |
| G2583_5175 | CDS  | 5305200 | 5305877 | +                | yjiG              | 5'-nucleotidase yjiG                                    |
| G2583_5176 | CDS  | 5306263 | 5307486 | +                | -                 | Phage integrase                                         |
| G2583_5177 | CDS  | 5307669 | 5311496 | +                | -                 | hypothetical protein                                    |
| G2583_5178 | CDS  | 5311893 | 5312513 | -                | yfdT              | hypothetical protein                                    |
| G2583_5179 | CDS  | 5312513 | 5312875 | -                | yfdS              | hypothetical protein                                    |
| G2583_5180 | CDS  | 5312866 | 5313402 | -                | yfdR              | hypothetical protein                                    |
| G2583_5181 | CDS  | 5313530 | 5314354 | -                | yfdQ              | hypothetical protein                                    |
| G2583_5182 | CDS  | 5314420 | 5315013 | -                | yfdP              | hypothetical protein                                    |
| G2583_5183 | CDS  | 5315151 | 5315429 | -                | -                 | hypothetical protein                                    |
| G2583_5184 | CDS  | 5315485 | 5316132 | -                | rpc               | Putative regulatory protein                             |
| G2583_5185 | CDS  | 5316275 | 5316535 | +                | -                 | hypothetical protein                                    |
| G2583_5186 | CDS  | 5316528 | 5317079 | +                | yfmL              | hypothetical protein                                    |
| G2583_5187 | CDS  | 5317076 | 5317414 | +                | yfmM              | e14 prophage predicted protein                          |
| G2583_5188 | CDS  | 5317424 | 5318365 | +                | yfdO              | Unknown protein encoded by cryptic prophage             |
| G2583_5189 | CDS  | 5318362 | 5318856 | +                | yfdN              | hypothetical protein                                    |
| G2583_5190 | CDS  | 5318856 | 5319509 | +                | yfdM              | putative DNA adenine methylase                          |
| G2583_5191 | CDS  | 5319506 | 5319832 | +                | -                 | hypothetical protein                                    |
| G2583_5192 | CDS  | 5319829 | 5320224 | +                | -                 | Holliday junction resolvase                             |
| G2583_5193 | CDS  | 5320387 | 5321202 | +                | KilA-N            | KilA-N domain family                                    |
| G2583_5194 | CDS  | 5321282 | 5322199 | +                | ydfU              | hypothetical protein                                    |
| G2583_5195 | CDS  | 5322213 | 5322965 | +                | ydfT              | Antitermination protein Q                               |
| G2583_5196 | CDS  | 5323388 | 5323600 | -                | cspF              | Cold shock-like protein cspF                            |
| G2583_5197 | CDS  | 5323901 | 5324116 | +                | cspB              | Cold shock-like protein cspB                            |
| G2583_5198 | CDS  | 5324869 | 5325084 | +                | essQ              | Lysis protein S-like protein from lambdoid prophage Qin |
| G2583_5199 | CDS  | 5325089 | 5325433 | +                | ydfR              | hypothetical protein                                    |
| G2583_5200 | CDS  | 5325399 | 5325671 | -                | -                 | hypothetical protein                                    |
| G2583_5201 | CDS  | 5325777 | 5326310 | +                | ydfQ              | phage lysozyme                                          |
| G2583_5202 | CDS  | 5326307 | 5326798 | +                | ydfP              | hypothetical protein                                    |
| G2583_5203 | CDS  | 5327167 | 5327379 | +                | cspl              | Cold shock-like protein cspl                            |
| G2583_5204 | CDS  | 5327651 | 5327881 | +                | ynfN              | hypothetical protein                                    |
| G2583_5205 | CDS  | 5328054 | 5328227 | +                | gnsB              | GnsB protein                                            |
| G2583_5206 | CDS  | 5328523 | 5328729 | +                | ybcW              | conserved hypothetical protein                          |
| G2583_5207 | CDS  | 5328983 | 5329303 | -                | ylcl              | hypothetical protein                                    |
| G2583_5208 | CDS  | 5329563 | 5330111 | +                | nohA              | Prophage Qin DNA packaging protein NU1-like protein     |
| G2583_5209 | CDS  | 5330041 | 5332011 | +                | -                 | Putative DNA packaging protein of prophage              |
| G2583_5210 | CDS  | 5331995 | 5332201 | +                | -                 | Head-stabilizing protein                                |
| G2583_5211 | CDS  | 5332198 | 5333790 | +                | -                 | Putative capsid protein of prophage                     |

| Locus_tag  | Type       | Start   | End     | +/- <sup>a</sup> | Gene <sup>b</sup> | Product                                                    |
|------------|------------|---------|---------|------------------|-------------------|------------------------------------------------------------|
| G2583_5212 | CDS        | 5333780 | 5335285 | +                | -                 | Head-tail preconnector protein GP5                         |
| G2583_5213 | CDS        | 5335322 | 5335669 | +                | -                 | Head decoration protein                                    |
| G2583_5214 | CDS        | 5335727 | 5336755 | +                | -                 | Major head protein                                         |
| G2583_5215 | CDS        | 5336807 | 5337181 | +                | -                 | Uncharacterized protein                                    |
| G2583_5216 | CDS        | 5337174 | 5337527 | +                | -                 | Putative head-tail joining protein of prophage             |
| G2583_5217 | CDS        | 5337539 | 5338117 | +                | -                 | Prophage minor tail protein Z                              |
| G2583_5218 | CDS        | 5338114 | 5338509 | +                | -                 | Permeases of the major facilitator superfamily             |
| G2583_5219 | CDS        | 5338487 | 5339257 | +                | -                 | Putative tail component of prophage                        |
| G2583_5220 | CDS        | 5339273 | 5339695 | +                | -                 | Putative tail component of prophage                        |
| G2583_5221 | CDS        | 5339677 | 5340111 | +                | -                 | Minor tail protein T                                       |
| G2583_5222 | CDS        | 5340104 | 5342665 | +                | -                 | Putative tail length tape measure protein                  |
| G2583_5223 | CDS        | 5342662 | 5342991 | +                | -                 | Minor tail protein                                         |
| G2583_5224 | CDS        | 5342991 | 5343689 | +                | -                 | Phage-related protein                                      |
| G2583_5225 | CDS        | 5343640 | 5344437 | +                | -                 | Putative tail fiber component K of prophage                |
| G2583_5226 | CDS        | 5344335 | 5344976 | +                | -                 | Putative tail component of prophage CP-933K                |
| G2583_5227 | CDS        | 5345037 | 5345387 | +                | -                 | hypothetical protein                                       |
| G2583_5228 | CDS        | 5345454 | 5348852 | +                | -                 | Phage-related protein, tail component                      |
| G2583_5229 | CDS        | 5348919 | 5349518 | +                | -                 | putative membrane protein precursor                        |
| G2583_5230 | CDS        | 5349583 | 5352411 | +                | -                 | PPE-repeat proteins                                        |
| G2583_5231 | CDS        | 5352411 | 5352986 | +                | tfaQ              | Tail fiber assembly protein from lambdoid prophage Qin     |
| G2583_5232 | CDS        | 5353084 | 5353674 | -                | pinR              | Putative DNA-invertase from lambdoid prophage Rac          |
| G2583_5233 | CDS        | 5354053 | 5354319 | -                | ydfK              | hypothetical protein                                       |
| G2583_5234 | CDS        | 5354895 | 5355143 | -                | -                 | hypothetical protein                                       |
| G2583_5235 | CDS        | 5355375 | 5356949 | +                | prfC              | Peptide chain release factor RF-3                          |
| G2583_5236 | CDS        | 5357342 | 5357947 | +                | osmY              | Osmotically inducible protein Y                            |
| G2583_5237 | CDS        | 5358357 | 5359430 | +                | yjjU              | hypothetical protein                                       |
| G2583_5238 | CDS        | 5359427 | 5360209 | +                | yjjV              | Hydrolase, TatD family                                     |
| G2583_5239 | CDS        | 5360423 | 5361286 | -                | yjjW              | Putative activating enzyme                                 |
| G2583_5240 | CDS        | 5361258 | 5362808 | -                | yjji              | hypothetical protein                                       |
| G2583_5241 | CDS        | 5363066 | 5363845 | +                | deoC              | Deoxyribose-phosphate aldolase                             |
| G2583_5242 | CDS        | 5363972 | 5365294 | +                | deoA              | Thymidine phosphorylase                                    |
| G2583_5243 | CDS        | 5365346 | 5366569 | +                | deoB              | Phosphopentomutase                                         |
| G2583_5244 | CDS        | 5366626 | 5367345 | +                | deoD              | Purine nucleoside phosphorylase                            |
| G2583_5245 | CDS        | 5367506 | 5367769 | -                | -                 | Helix-turn-helix domain protein                            |
| G2583_5246 | pseudogene | 5367801 | 5369489 | -                | lplA              | protein smp precursor                                      |
| G2583_5247 | CDS        | 5369595 | 5370563 | +                | serB              | Phosphoserine phosphatase                                  |
| G2583_5248 | CDS        | 5370612 | 5371994 | +                | radA              | Predicted ATP-dependent serine protease                    |
| G2583_5249 | CDS        | 5372015 | 5373247 | +                | nadR              | bifunctional DNA-binding transcriptional repressor and NMN |
| G2583_5250 | CDS        | 5373555 | 5375222 | -                | yjjK              | Uncharacterized ABC transporter ATP-binding protein yjjK   |
| G2583_5251 | CDS        | 5375433 | 5377370 | +                | slt               | Soluble lytic murein transglycosylase                      |
| G2583_5252 | CDS        | 5377460 | 5377786 | +                | trpR              | Trp operon repressor                                       |
| G2583_5253 | CDS        | 5377933 | 5378454 | -                | yjjX              | conserved hypothetical protein                             |
| G2583_5254 | CDS        | 5378497 | 5379144 | +                | ytjC              | Probable phosphoglycerate mutase gpmB                      |
| G2583_5255 | CDS        | 5379141 | 5380010 | -                | rob               | Right origin-binding protein                               |
| G2583_5256 | CDS        | 5380221 | 5380694 | +                | creA              | hypothetical protein                                       |
| G2583_5257 | CDS        | 5380707 | 5381396 | +                | creB              | DNA-binding response regulator CreB                        |
| G2583_5258 | CDS        | 5381396 | 5382820 | +                | creC              | sensory histidine kinase CreC                              |
| G2583_5259 | CDS        | 5382878 | 5384230 | +                | creD              | Inner membrane protein CreD                                |
| G2583_5260 | CDS        | 5384290 | 5385006 | -                | arcA              | Aerobic respiration control protein arcA                   |
| G2583_5261 | CDS        | 5385102 | 5385242 | +                | yjjY              | hypothetical protein                                       |
| G2583_5262 | CDS        | 5385642 | 5386328 | +                | yjtD              | RNA methyltransferase, TrmH family, group 1                |

<sup>a</sup>+/-, orientation as annotated. <sup>b</sup>Gene name from K12 MG1655 and EDL933 genome annotation.
