# Supplementary material for: Derivation of Escherichia coli O157:H7 from Its O55:H7 Precursor
Source: PubMed Central journal article supplement (PMC2806823; doi:10.1371/journal.pone.0008700), 2010-01-14
Supplement: pone.0008700.s004.pdf [file pone.0008700.s004.pdf]

| lineage <sup>a</sup> | mutation          |                   | recomb | gene       | Gene name | Type       |
|----------------------|-------------------|-------------------|--------|------------|-----------|------------|
|                      | site <sup>b</sup> | type <sup>c</sup> |        |            |           |            |
| CB9615               | 68                | i                 |        | intergenic |           |            |
| O157                 | 230               | ins-18            |        | G2583_0001 | thrL      | pseudogene |
| CB9615               | 1772              | s                 |        | G2583_0002 | thrA      | CDS        |
| O157                 | 3135              | s                 |        | G2583_0003 | thrB      | CDS        |
| CB9615               | 3160              | ns                |        | G2583_0003 | thrB      | CDS        |
| O157                 | 11682             | ns                |        | G2583_0013 | yaal      | CDS        |
| CB9615               | 13083             | s                 |        | G2583_0014 | dnaK      | CDS        |
| CB9615               | 15216             | s                 |        | G2583_0015 | dnaJ      | CDS        |
| CB9615               | 15594             | ns                |        | G2583_0016 | mokC      | CDS        |
| CB9615               | 15595             | ns                |        | G2583_0016 | mokC      | CDS        |
| CB9615               | 16562             | ns                |        | G2583_0017 | nhaA      | CDS        |
| O157                 | 17613             | s                 |        | G2583_0018 | nhaR      | CDS        |
| O157                 | 17693             | ns                |        | G2583_0018 | nhaR      | CDS        |
| O157                 | 18711             | ns                |        | G2583_0019 | -         | CDS        |
| Sakai                | 18870             | del               |        | G2583_0019 | -         | CDS        |
| O157                 | 18994             | ins               |        | G2583_0019 | -         | CDS        |
| O157                 | 23608             | s                 |        | G2583_0023 | -         | CDS        |
| CB9615               | 24215             | ns                |        | G2583_0023 | -         | CDS        |
| CB9615               | 24797             | i                 |        | intergenic |           |            |
| CB9615               | 24966             | i                 |        | intergenic |           |            |
| O157                 | 27142             | ns                |        | G2583_0027 | ileS      | CDS        |
| CB9615               | 29411             | s                 |        | G2583_0027 | ileS      | CDS        |
| O157                 | 33077             | s                 |        | G2583_0032 | dapB      | CDS        |
| CB9615               | 35214             | s                 |        | G2583_0034 | carB      | CDS        |
| CB9615               | 36586             | s                 |        | G2583_0034 | carB      | CDS        |
| CB9615               | 37875             | s                 |        | G2583_0034 | carB      | CDS        |
| O157                 | 39899             | ns                |        | G2583_0038 | caiD      | CDS        |
| O157                 | 41181             | ns                |        | G2583_0039 | caiC      | CDS        |
| O157                 | 45916             | ns                |        | G2583_0042 | caiT      | CDS        |
| CB9615               | 46532             | del-5             |        | intergenic |           |            |
| CB9615               | 46568             | i                 |        | intergenic |           |            |
| CB9615               | 47781             | s                 |        | G2583_0044 | fixB      | CDS        |
| CB9615               | 47895             | s                 |        | G2583_0044 | fixB      | CDS        |
| O157                 | 48272             | s                 |        | G2583_0044 | fixB      | CDS        |
| CB9615               | 48524             | i                 |        | intergenic |           |            |
| CB9615               | 48749             | s                 |        | G2583_0045 | fixC      | CDS        |
| O157                 | 49130             | ns                |        | G2583_0045 | fixC      | CDS        |
| O157                 | 51720             | ns                |        | G2583_0048 | kefF      | CDS        |
| O157                 | 53695             | ns                |        | G2583_0049 | kefC      | CDS        |
| O157                 | 53715             | s                 |        | G2583_0049 | kefC      | CDS        |
| O157                 | 54375             | ns                |        | G2583_0050 | folA      | CDS        |
| O157                 | 61460             | ns                |        | G2583_0058 | imp       | CDS        |
| CB9615               | 61782             | del-6             |        | G2583_0058 | imp       | CDS        |
| O157                 | 61916             | ns                |        | G2583_0058 | imp       | CDS        |
| CB9615               | 62434             | ns                |        | G2583_0059 | djIA      | CDS        |

| lineage <sup>a</sup> | site <sup>b</sup> | mutation          |        | gene       | Gene name | Type       |
|----------------------|-------------------|-------------------|--------|------------|-----------|------------|
|                      |                   | type <sup>c</sup> | recomb |            |           |            |
| O157                 | 63127             | s                 |        | G2583_0059 | djIA      | CDS        |
| O55/O157             | 64021             | ns                |        | G2583_0060 | yabP      | CDS        |
| CB9615               | 64037             | del-15            |        | G2583_0060 | yabP      | CDS        |
| O157                 | 68716             | ns                |        | G2583_0063 | polB      | CDS        |
| O157                 | 68978             | s                 |        | G2583_0063 | polB      | CDS        |
| CB9615               | 70349             | ns                |        | G2583_0063 | polB      | CDS        |
| CB9615               | 72621             | s                 |        | G2583_0065 | araA      | CDS        |
| O157                 | 77773             | ns                |        | G2583_0070 | thiP      | CDS        |
| O157                 | 80651             | i                 |        | intergenic |           |            |
| O157                 | 81668             | ns                |        | G2583_0073 | sgrR      | CDS        |
| CB9615               | 84216             | s                 |        | G2583_0076 | leuC      | CDS        |
| O157                 | 84308             | s                 |        | G2583_0076 | leuC      | CDS        |
| CB9615               | 88405             | i                 |        | intergenic |           |            |
| CB9615               | 88632             | i                 |        | intergenic |           |            |
| O157                 | 88701             | i                 |        | intergenic |           |            |
| CB9615               | 88938             | ns                |        | G2583_0080 | leuO      | CDS        |
| O157                 | 92154             | ns                |        | G2583_0082 | ilvH      | CDS        |
| CB9615               | 97089             | s                 |        | G2583_0088 | ftsI      | CDS        |
| CB9615               | 97345             | ns                |        | G2583_0088 | ftsI      | CDS        |
| CB9615               | 98791             | s                 |        | G2583_0089 | murE      | CDS        |
| O157                 | 99098             | ns                |        | G2583_0089 | murE      | CDS        |
| O157                 | 104256            | ns                |        | G2583_0094 | murG      | CDS        |
| CB9615               | 105290            | i                 |        | intergenic |           |            |
| O157                 | 107438            | ns                |        | G2583_0096 | ddlB      | CDS        |
| CB9615               | 111523            | ns                |        | G2583_0100 | lpxC      | CDS        |
| O157                 | 112158            | ins               |        | G2583_0101 | secM      | CDS        |
| CB9615               | 113450            | s                 |        | G2583_0102 | secA      | CDS        |
| CB9615               | 113690            | s                 |        | G2583_0102 | secA      | CDS        |
| CB9615               | 120536            | nc                |        | G2583_0111 | hofB      | pseudogene |
| CB9615               | 120839            | nc                |        | G2583_0111 | hofB      | pseudogene |
| CB9615               | 124154            | ns                |        | G2583_0115 | ampE      | CDS        |
| CB9615               | 124225            | s                 |        | G2583_0115 | ampE      | CDS        |
| O157                 | 125601            | ns                |        | G2583_0116 | aroP      | CDS        |
| O157                 | 126145            | i                 |        | intergenic |           |            |
| O157                 | 130378            | s                 |        | G2583_0119 | aceF      | CDS        |
| O157                 | 130479            | ns                |        | G2583_0119 | aceF      | CDS        |
| O157                 | 130485            | ns                |        | G2583_0119 | aceF      | CDS        |
| CB9615               | 133723            | ins               |        | intergenic |           |            |
| O157                 | 137723            | s                 |        | G2583_0122 | acnB      | CDS        |
| CB9615               | 137832            | ns                |        | G2583_0122 | acnB      | CDS        |
| CB9615               | 140722            | ns                |        | G2583_0125 | speE      | CDS        |
| CB9615               | 140745            | s                 |        | G2583_0125 | speE      | CDS        |
| O157                 | 142584            | ns                |        | G2583_0127 | cueO      | CDS        |
| O157                 | 142879            | s                 |        | G2583_0127 | cueO      | CDS        |
| O157                 | 142935            | ns                |        | G2583_0127 | cueO      | CDS        |

| lineage <sup>a</sup> | site <sup>b</sup> | mutation          |        | gene       | Gene name | Type |
|----------------------|-------------------|-------------------|--------|------------|-----------|------|
|                      |                   | type <sup>c</sup> | recomb |            |           |      |
| CB9615               | 143250            | s                 |        | G2583_0128 | gcd       | CDS  |
| O157                 | 149664            | ns                |        | G2583_0134 | yadE      | CDS  |
| CB9615               | 150418            | ns                |        | G2583_0134 | yadE      | CDS  |
| CB9615               | 151169            | i                 |        | intergenic |           |      |
| O157                 | 152504            | ins-7             |        | intergenic |           |      |
| O157                 | 153464            | s                 |        | G2583_0138 | panB      | CDS  |
| O55/O157             | 155342            | ns                |        | G2583_0139 | yadC      | CDS  |
| O55/O157             | 155668            | ns                |        | G2583_0140 | yadK      | CDS  |
| O157                 | 157299            | ns                |        | G2583_0143 | htrE      | CDS  |
| O157                 | 157731            | ns                |        | G2583_0143 | htrE      | CDS  |
| CB9615               | 157787            | s                 |        | G2583_0143 | htrE      | CDS  |
| EDL933               | 158811            | ns                |        | G2583_0143 | htrE      | CDS  |
| O55/O157             | 159379            | ns                |        | G2583_0143 | htrE      | CDS  |
| O157                 | 159972            | ns                |        | G2583_0144 | ecpD      | CDS  |
| CB9615               | 160118            | ns                |        | G2583_0144 | ecpD      | CDS  |
| Sakai                | 160672            | i                 |        | intergenic |           |      |
| CB9615               | 160916            | ns                |        | G2583_0145 | yadN      | CDS  |
| O55/O157             | 161322            | i                 |        | intergenic |           |      |
| O55/O157             | 161496            | indel             |        | intergenic |           |      |
| CB9615               | 162437            | s                 |        | G2583_0147 | pcnB      | CDS  |
| O157                 | 164723            | s                 |        | G2583_0149 | dkcA      | CDS  |
| O157                 | 165836            | ns                |        | G2583_0151 | ligT      | CDS  |
| CB9615               | 168865            | i                 |        | intergenic |           |      |
| CB9615               | 171141            | s                 |        | G2583_0153 | mrcB      | CDS  |
| O157                 | 171729            | i                 |        | intergenic |           |      |
| O157                 | 171915            | ns                |        | G2583_0154 | fhuA      | CDS  |
| CB9615               | 172434            | s                 |        | G2583_0154 | fhuA      | CDS  |
| CB9615               | 172823            | ns                |        | G2583_0154 | fhuA      | CDS  |
| CB9615               | 173010            | s                 |        | G2583_0154 | fhuA      | CDS  |
| O157                 | 174080            | i                 |        | intergenic |           |      |
| CB9615               | 175920            | s                 |        | G2583_0157 | fhuB      | CDS  |
| CB9615               | 176796            | s                 |        | G2583_0157 | fhuB      | CDS  |
| O157                 | 178365            | s                 |        | G2583_0158 | hemL      | CDS  |
| O157                 | 180160            | s                 |        | G2583_0159 | clcA      | CDS  |
| O157                 | 181573            | ns                |        | G2583_0161 | yadS      | CDS  |
| O157                 | 182330            | ns                |        | G2583_0162 | btuF      | CDS  |
| O157                 | 184717            | s                 |        | G2583_0164 | dgt       | CDS  |
| CB9615               | 186669            | s                 |        | G2583_0166 | cdaR      | CDS  |
| O157                 | 188771            | ns                |        | G2583_0168 | dapD      | CDS  |
| CB9615               | 192082            | i                 |        | intergenic |           |      |
| EDL933               | 193444            | s                 |        | G2583_0172 | rpsB      | CDS  |
| CB9615               | 194111            | i                 |        | intergenic |           |      |
| O157                 | 203763            | del               |        | intergenic |           |      |
| Sakai                | 205552            | ns                |        | G2583_0183 | fabZ      | CDS  |
| O157                 | 206371            | ns                |        | G2583_0184 | lpxA      | CDS  |

| lineage <sup>a</sup> | site <sup>b</sup> | mutation          |        | gene       | Gene name | Type |
|----------------------|-------------------|-------------------|--------|------------|-----------|------|
|                      |                   | type <sup>c</sup> | recomb |            |           |      |
| O157                 | 207004            | ns                |        | G2583_0185 | lpxB      | CDS  |
| CB9615               | 207476            | s                 |        | G2583_0185 | lpxB      | CDS  |
| CB9615               | 209270            | ns                |        | G2583_0187 | dnaE      | CDS  |
| O157                 | 215798            | ns                |        | G2583_0191 | tilS      | CDS  |
| O157                 | 216648            | s                 |        | G2583_0191 | tilS      | CDS  |
| O157                 | 216680            | ns                |        | G2583_0191 | tilS      | CDS  |
| O157                 | 216899            | ns                |        | G2583_0191 | tilS      | CDS  |
| CB9615               | 217696            | ns                |        | G2583_0194 | yaeQ      | CDS  |
| O157                 | 218091            | ns                |        | G2583_0194 | yaeQ      | CDS  |
| O157                 | 218572            | del-12            |        | G2583_0195 | yaeJ      | CDS  |
| O157                 | 220106            | ns                |        | G2583_0197 | yaeF      | CDS  |
| CB9615               | 220361            | s                 |        | G2583_0198 | proS      | CDS  |
| O157                 | 222346            | s                 |        | G2583_0199 | yaeB      | CDS  |
| CB9615               | 225362            | ns                |        | G2583_0203 | metN      | CDS  |
| CB9615               | 226620            | ns                |        | G2583_0204 | gmhB      | CDS  |
| O157                 | 226827            | i                 |        | intergenic |           |      |
| CB9615               | 226834            | del               |        | intergenic |           |      |
| CB9615               | 226836            | i                 |        | intergenic |           |      |
| CB9615               | 226868            | i                 |        | intergenic |           |      |
| O157                 | 227246            | nc                |        | G2583_0205 | rrs       | rRNA |
| O157                 | 229735            | nc                |        | G2583_0208 | rri       | rRNA |
| Sakai                | 230035            | nc                |        | G2583_0208 | rri       | rRNA |
| CB9615               | 230268            | nc                |        | G2583_0208 | rri       | rRNA |
| CB9615               | 230277            | nc                |        | G2583_0208 | rri       | rRNA |
| O157                 | 232097            | nc                |        | G2583_0209 | rrf       | rRNA |
| CB9615               | 232171            | i                 |        | intergenic |           |      |
| O157                 | 235029            | s                 |        | G2583_0213 | yafD      | CDS  |
| O157                 | 235432            | ns                |        | G2583_0214 | yafE      | CDS  |
| O157                 | 238495            | ns                |        | G2583_0217 | yafS      | CDS  |
| O157                 | 239591            | i                 |        | intergenic |           |      |
| O157                 | 240618            | ins               |        | intergenic |           |      |
| O55/O157             | 241801            | i                 |        | intergenic |           |      |
| CB9615               | 242655            | ns                |        | G2583_0224 | -         | CDS  |
| O157                 | 243292            | ns                |        | G2583_0224 | -         | CDS  |
| O157                 | 243714            | ns                |        | G2583_0225 | yhhZ      | CDS  |
| O157                 | 249997            | del               |        | G2583_0228 | ImpA      | CDS  |
| CB9615               | 252262            | ins-12            |        | G2583_0230 | clpB      | CDS  |
| CB9615               | 252743            | s                 |        | G2583_0230 | clpB      | CDS  |
| O157                 | 253307            | ns                |        | G2583_0230 | clpB      | CDS  |
| O157                 | 254058            | s                 |        | G2583_0231 | -         | CDS  |
| O157                 | 254587            | ns                |        | G2583_0231 | -         | CDS  |
| O157                 | 255200            | ns                |        | G2583_0232 | -         | CDS  |
| CB9615               | 255682            | ns                |        | G2583_0232 | -         | CDS  |
| CB9615               | 257039            | ns                |        | G2583_0234 | -         | CDS  |
| CB9615               | 257682            | del               |        | intergenic |           |      |

| lineage <sup>a</sup> | site <sup>b</sup> | mutation          |        | gene       | Gene name | Type       |
|----------------------|-------------------|-------------------|--------|------------|-----------|------------|
|                      |                   | type <sup>c</sup> | recomb |            |           |            |
| O157                 | 259555            | s                 |        | G2583_0236 | -         | CDS        |
| O157                 | 261137            | ns                |        | G2583_0237 | -         | CDS        |
| O157                 | 261237            | nc                |        | G2583_0238 | -         | pseudogene |
| CB9615               | 261680            | nc                |        | G2583_0238 | -         | pseudogene |
| CB9615               | 261984            | nc                |        | G2583_0238 | -         | pseudogene |
| O157                 | 263163            | ns                |        | G2583_0240 | -         | CDS        |
| CB9615               | 263595            | i                 |        | intergenic |           |            |
| O157                 | 263672            | i                 |        | intergenic |           |            |
| O157                 | 263701            | i                 |        | intergenic |           |            |
| O157                 | 263921            | ns                |        | G2583_0241 | -         | CDS        |
| Sakai                | 264928            | ns                |        | G2583_0244 | VgrG      | CDS        |
| O157                 | 264970            | ns                |        | G2583_0244 | VgrG      | CDS        |
| CB9615               | 265088            | s                 |        | G2583_0244 | VgrG      | CDS        |
| O157                 | 265423            | ns                |        | G2583_0244 | VgrG      | CDS        |
| CB9615               | 266558            | s                 |        | G2583_0244 | VgrG      | CDS        |
| O157                 | 267092            | nc                |        | G2583_0245 | rhsD      | pseudogene |
| CB9615               | 267119            | nc                |        | G2583_0245 | rhsD      | pseudogene |
| CB9615               | 267128            | nc                |        | G2583_0245 | rhsD      | pseudogene |
| O157                 | 268213            | nc                |        | G2583_0245 | rhsD      | pseudogene |
| O157                 | 269117            | nc                |        | G2583_0245 | rhsD      | pseudogene |
| CB9615               | 269127            | nc                |        | G2583_0245 | rhsD      | pseudogene |
| O157                 | 269551            | nc                |        | G2583_0245 | rhsD      | pseudogene |
| O55/O157             | 272486            | nc                | rec    | G2583_0247 | rhsH      | pseudogene |
| O55/O157             | 272489            | nc                | rec    | G2583_0247 | rhsH      | pseudogene |
| O55/O157             | 272507            | nc                | rec    | G2583_0247 | rhsH      | pseudogene |
| O55/O157             | 272519            | nc                | rec    | G2583_0247 | rhsH      | pseudogene |
| O55/O157             | 272540            | nc                | rec    | G2583_0247 | rhsH      | pseudogene |
| O55/O157             | 272550            | nc                | rec    | G2583_0247 | rhsH      | pseudogene |
| O55/O157             | 272570            | nc                | rec    | G2583_0247 | rhsH      | pseudogene |
| O55/O157             | 272573            | nc                | rec    | G2583_0247 | rhsH      | pseudogene |
| O55/O157             | 272576            | nc                | rec    | G2583_0247 | rhsH      | pseudogene |
| O55/O157             | 272591            | nc                | rec    | G2583_0247 | rhsH      | pseudogene |
| O55/O157             | 272693            | nc                | rec    | G2583_0247 | rhsH      | pseudogene |
| O55/O157             | 272711            | nc                | rec    | G2583_0247 | rhsH      | pseudogene |
| O55/O157             | 272723            | nc                | rec    | G2583_0247 | rhsH      | pseudogene |
| O55/O157             | 272726            | nc                | rec    | G2583_0247 | rhsH      | pseudogene |
| O55/O157             | 272736            | nc                | rec    | G2583_0247 | rhsH      | pseudogene |
| O55/O157             | 272738            | nc                | rec    | G2583_0247 | rhsH      | pseudogene |
| O55/O157             | 272739            | nc                | rec    | G2583_0247 | rhsH      | pseudogene |
| O55/O157             | 272740            | nc                | rec    | G2583_0247 | rhsH      | pseudogene |
| O55/O157             | 272741            | nc                | rec    | G2583_0247 | rhsH      | pseudogene |
| O55/O157             | 272744            | nc                | rec    | G2583_0247 | rhsH      | pseudogene |
| O55/O157             | 272745            | nc                | rec    | G2583_0247 | rhsH      | pseudogene |
| O55/O157             | 272747            | nc                | rec    | G2583_0247 | rhsH      | pseudogene |
| O55/O157             | 272759            | nc                | rec    | G2583_0247 | rhsH      | pseudogene |

| lineage <sup>a</sup> | site <sup>b</sup> | mutation          |        | gene       | Gene name | Type       |
|----------------------|-------------------|-------------------|--------|------------|-----------|------------|
|                      |                   | type <sup>c</sup> | recomb |            |           |            |
| O55/O157             | 272771            | nc                | rec    | G2583_0247 | rhsH      | pseudogene |
| O55/O157             | 272810            | nc                | rec    | G2583_0247 | rhsH      | pseudogene |
| O55/O157             | 272834            | nc                | rec    | G2583_0247 | rhsH      | pseudogene |
| O55/O157             | 272867            | nc                | rec    | G2583_0247 | rhsH      | pseudogene |
| O55/O157             | 272933            | nc                | rec    | G2583_0247 | rhsH      | pseudogene |
| Sakai                | 270484            | nc                | rec    | G2583_0247 | rhsH      | pseudogene |
| Sakai                | 270502            | nc                | rec    | G2583_0247 | rhsH      | pseudogene |
| Sakai                | 270545            | nc                | rec    | G2583_0247 | rhsH      | pseudogene |
| Sakai                | 270562            | nc                | rec    | G2583_0247 | rhsH      | pseudogene |
| Sakai                | 270577            | nc                | rec    | G2583_0247 | rhsH      | pseudogene |
| Sakai                | 270579            | nc                | rec    | G2583_0247 | rhsH      | pseudogene |
| Sakai                | 270584            | nc                | rec    | G2583_0247 | rhsH      | pseudogene |
| Sakai                | 270592            | nc                | rec    | G2583_0247 | rhsH      | pseudogene |
| Sakai                | 270594            | nc                | rec    | G2583_0247 | rhsH      | pseudogene |
| Sakai                | 270595            | nc                | rec    | G2583_0247 | rhsH      | pseudogene |
| Sakai                | 270596            | nc                | rec    | G2583_0247 | rhsH      | pseudogene |
| Sakai                | 270598            | nc                | rec    | G2583_0247 | rhsH      | pseudogene |
| Sakai                | 270627            | nc                | rec    | G2583_0247 | rhsH      | pseudogene |
| Sakai                | 270646            | nc                | rec    | G2583_0247 | rhsH      | pseudogene |
| Sakai                | 270666            | nc                | rec    | G2583_0247 | rhsH      | pseudogene |
| Sakai                | 270668            | nc                | rec    | G2583_0247 | rhsH      | pseudogene |
| Sakai                | 270674            | nc                | rec    | G2583_0247 | rhsH      | pseudogene |
| O157                 | 272354            | ns                |        | G2583_0250 | -         | CDS        |
| CB9615               | 274856            | ns                |        | G2583_0250 | -         | CDS        |
| O157                 | 272851            | ns                |        | G2583_0251 | yhhl      | CDS        |
| O157                 | 273176            | s                 |        | G2583_0251 | yhhl      | CDS        |
| O157                 | 273923            | ns                |        | G2583_0252 | rhsD      | CDS        |
| CB9615               | 276826            | s                 |        | G2583_0252 | rhsD      | CDS        |
| O157                 | 274506            | ns                |        | G2583_0252 | rhsD      | CDS        |
| CB9615               | 277259            | s                 |        | G2583_0252 | rhsD      | CDS        |
| O157                 | 274975            | s                 |        | G2583_0252 | rhsD      | CDS        |
| O157                 | 280350            | ns                |        | G2583_0257 | fadE      | CDS        |
| CB9615               | 282980            | s                 |        | G2583_0257 | fadE      | CDS        |
| CB9615               | 283888            | i                 |        | intergenic |           |            |
| O157                 | 284183            | del-2             |        | G2583_0261 | yafQ      | CDS        |
| O157                 | 284481            | i                 |        | intergenic |           |            |
| O157                 | 284949            | s                 |        | G2583_0263 | yafL      | CDS        |
| O157                 | 285478            | i                 |        | intergenic |           |            |
| O157                 | 285598            | i                 |        | intergenic |           |            |
| CB9615               | 288917            | s                 |        | G2583_0265 | FhiA      | CDS        |
| O157                 | 287783            | s                 |        | G2583_0265 | FhiA      | CDS        |
| O157                 | 289210            | ns                |        | G2583_0267 | dinB      | CDS        |
| CB9615               | 293727            | i                 |        | intergenic |           |            |
| CB9615               | 294876            | s                 |        | G2583_0273 | pepD      | CDS        |
| O157                 | 294920            | s                 |        | G2583_0275 | frsA      | CDS        |

| lineage <sup>a</sup> | site <sup>b</sup> | mutation          |        | gene       | Gene name | Type       |
|----------------------|-------------------|-------------------|--------|------------|-----------|------------|
|                      |                   | type <sup>c</sup> | recomb |            |           |            |
| O157                 | 295149            | ns                |        | G2583_0275 | frsA      | CDS        |
| CB9615               | 302241            | ns                |        | G2583_0279 | proA      | CDS        |
| CB9615               | 302620            | i                 |        | intergenic |           |            |
| O55/O157             | 351852            | ns                |        | G2583_0351 | -         | CDS        |
| O55/O157             | 352160            | s                 |        | G2583_0351 | -         | CDS        |
| O55/O157             | 352655            | s                 |        | G2583_0351 | -         | CDS        |
| O55/O157             | 353019            | ns                |        | G2583_0352 | -         | CDS        |
| O55/O157             | 354030            | ns                |        | G2583_0354 | -         | CDS        |
| O55/O157             | 354909            | indel             |        | G2583_0355 | -         | pseudogene |
| O55/O157             | 354927            | nc                |        | G2583_0355 | -         | pseudogene |
| O55/O157             | 355063            | nc                |        | G2583_0355 | -         | pseudogene |
| O55/O157             | 355069            | nc                |        | G2583_0355 | -         | pseudogene |
| O55/O157             | 355077            | i                 |        | intergenic |           |            |
| O55/O157             | 355165            | ns                |        | G2583_0356 | -         | CDS        |
| O55/O157             | 355596            | ns                |        | G2583_0356 | -         | CDS        |
| O55/O157             | 314615            | indel             |        | G2583_0356 | -         | CDS        |
| O55/O157             | 355719            | s                 |        | G2583_0357 | -         | CDS        |
| O55/O157             | 356069            | ns                |        | G2583_0357 | -         | CDS        |
| O55/O157             | 356460            | i                 |        | intergenic |           |            |
| O55/O157             | 357897            | s                 |        | G2583_0360 | sidI      | CDS        |
| O55/O157             | 317349            | indel-15          |        | intergenic |           |            |
| O55/O157             | 358376            | i                 |        | intergenic |           |            |
| O55/O157             | 358942            | i                 |        | intergenic |           |            |
| O55/O157             | 359857            | ns                |        | G2583_0363 | -         | CDS        |
| CB9615               | 361724            | ns                |        | G2583_0366 | -         | CDS        |
| O55/O157             | 363783            | ns                |        | G2583_0367 | -         | CDS        |
| O55/O157             | 363874            | s                 |        | G2583_0367 | -         | CDS        |
| O55/O157             | 323350            | indel             |        | intergenic |           |            |
| O55/O157             | 364419            | i                 |        | intergenic |           |            |
| O55/O157             | 366418            | i                 |        | intergenic |           |            |
| O55/O157             | 325514            | indel             |        | intergenic |           |            |
| O157                 | 327035            | ns                |        | G2583_0372 | -         | CDS        |
| CB9615               | 368572            | ns                |        | G2583_0373 | -         | CDS        |
| O157                 | 327992            | s                 |        | G2583_0373 | -         | CDS        |
| O157                 | 329623            | ns                |        | G2583_0374 | -         | CDS        |
| O157                 | 329641            | ns                |        | G2583_0374 | -         | CDS        |
| CB9615               | 370778            | ns                |        | G2583_0374 | -         | CDS        |
| CB9615               | 371592            | ins               |        | G2583_0375 | yagQ      | pseudogene |
| O157                 | 331010            | nc                |        | G2583_0375 | yagQ      | pseudogene |
| CB9615               | 372009            | nc                |        | G2583_0375 | yagQ      | pseudogene |
| O157                 | 331468            | s                 |        | G2583_0376 | yagR      | CDS        |
| O157                 | 331675            | ns                |        | G2583_0376 | yagR      | CDS        |
| O157                 | 332184            | ns                |        | G2583_0376 | yagR      | CDS        |
| CB9615               | 373580            | s                 |        | G2583_0376 | yagR      | CDS        |
| O157                 | 333584            | ns                |        | G2583_0377 | yagS      | CDS        |

| lineage <sup>a</sup> | site <sup>b</sup> | mutation          |        | gene            | Gene name | Type       |
|----------------------|-------------------|-------------------|--------|-----------------|-----------|------------|
|                      |                   | type <sup>c</sup> | recomb |                 |           |            |
| CB9615               | 375238            | ns                |        | G2583_0377      | yagS      | CDS        |
| CB9615               | 377140            | i                 |        | intergenic      |           |            |
| O157                 | 337018            | ns                |        | G2583_0381      | yagV      | CDS        |
| Sakai                | 338461            | s                 |        | G2583_0382      | yagW      | CDS        |
| CB9615               | 379728            | s                 |        | G2583_0382      | yagW      | CDS        |
| O157                 | 342459            | i                 |        | intergenic      |           |            |
| CB9615               | 383951            | s                 |        | G2583_0385      | matB      | CDS        |
| CB9615               | 383993            | s                 |        | G2583_0385      | matB      | CDS        |
| CB9615               | 384694            | s                 |        | G2583_0386      | matA      | CDS        |
| O157                 | 343853            | ins               |        | intergenic      |           |            |
| O157                 | 344143            | i                 |        | intergenic      |           |            |
| Sakai                | 345586            | ns                |        | ECs0328         | -         | CDS        |
| CB9615               | 386535            | i                 |        | intergenic      |           |            |
| EDL933               | 348032            | ins               |        | intergenic      |           |            |
| O157                 | 348047            | del               |        | intergenic      |           |            |
| EDL933               | 349752            | ins               |        | intergenic      |           |            |
| O157                 | 349878            | i                 |        | intergenic      |           |            |
| CB9615               | 389309            | ns                |        | G2583_0392      | ycjY      | CDS        |
| O157                 | 351109            | ns                |        | G2583_0393      | ycaN      | CDS        |
| O157                 | 351209            | ns                |        | G2583_0393      | ycaN      | CDS        |
| O55/O157             | 390700            | i                 |        | intergenic      |           |            |
| O55/O157             | 391163            | ns                |        | G2583_0395      | -         | CDS        |
| CB9615               | 391626            | ns                |        | G2583_0396      | -         | CDS        |
| CB9615               | 393151            | ns                |        | G2583_0397      | eaeH      | CDS        |
| CB9615               | 394296            | ns                |        | G2583_0397      | eaeH      | CDS        |
| O157                 | 357832            | ns                |        | G2583_0397      | eaeH      | CDS        |
| O157                 | 358198            | i                 |        | intergenic      |           |            |
| O157                 | 358636            | ns                |        | G2583_0398      | ykgA      | CDS        |
| O157                 | 360481            | ns                |        | G2583_0400      | ykgB      | CDS        |
| CB9615               | 399018            | ns                |        | G2583_0400      | ykgB      | CDS        |
| O157                 | 360985            | ns                |        | G2583_0400      | ykgB      | CDS        |
| O157                 | 361040            | ns                |        | G2583_0401      | -         | CDS        |
| CB9615               | 399792            | ns                |        | G2583_0401-0402 | ykgI      | CDS        |
| O157                 | 363999            | i                 |        | intergenic      |           |            |
| O157                 | 364187            | i                 |        | intergenic      |           |            |
| CB9615               | 403579            | ns                |        | G2583_0406      | ykgF      | CDS        |
| O157                 | 366985            | ns                |        | G2583_0407      | ykgG      | CDS        |
| O157                 | 367851            | nc                |        | G2583_0409      | ykgH      | pseudogene |
| O157                 | 371105            | ns                |        | G2583_0412      | -         | CDS        |
| O157                 | 371331            | i                 |        | intergenic      |           |            |
| CB9615               | 411165            | nc                |        | G2583_0413      | fimX      | pseudogene |
| O55/O157             | 412020            | i                 | rec    | intergenic      |           |            |
| O55/O157             | 412048            | i                 | rec    | intergenic      |           |            |
| O55/O157             | 412101            | i                 | rec    | intergenic      |           |            |
| O55/O157             | 412121            | i                 | rec    | intergenic      |           |            |



| lineage <sup>a</sup> | site <sup>b</sup> | mutation          |        | gene       | Gene name | Type       |
|----------------------|-------------------|-------------------|--------|------------|-----------|------------|
|                      |                   | type <sup>c</sup> | recomb |            |           |            |
| Sakai                | 372674            | ins               |        | intergenic |           |            |
| O55/O157             | 412242            | indel             | rec    | intergenic |           |            |
| O55/O157             | 412309            | indel             | rec    | intergenic |           |            |
| Sakai                | 372766            | i                 |        | intergenic |           |            |
| O55/O157             | 412337            | i                 | rec    | intergenic |           |            |
| O55/O157             | 412358            | i                 | rec    | intergenic |           |            |
| Sakai                | 372814            | i                 |        | intergenic |           |            |
| O55/O157             | 412388            | i                 | rec    | intergenic |           |            |
| O157                 | 374824            | s                 |        | G2583_0415 | betA      | CDS        |
| Sakai                | 375317            | ns                |        | G2583_0416 | betB      | CDS        |
| CB9615               | 415679            | ns                |        | G2583_0416 | betB      | CDS        |
| CB9615               | 416071            | s                 |        | G2583_0417 | betI      | CDS        |
| O157                 | 377002            | s                 |        | G2583_0417 | betI      | CDS        |
| CB9615               | 419077            | i                 |        | intergenic |           |            |
| O157                 | 384735            | ns                |        | G2583_0420 | yahA      | CDS        |
| CB9615               | 424356            | ns                |        | G2583_0420 | yahA      | CDS        |
| O157                 | 385197            | nc                |        | G2583_0421 | yahB      | pseudogene |
| CB9615               | 425321            | nc                |        | G2583_0421 | yahB      | pseudogene |
| O157                 | 385959            | i                 |        | intergenic |           |            |
| CB9615               | 425989            | ins-10            |        | G2583_0422 | yahC      | pseudogene |
| O157                 | 389262            | ns                |        | G2583_0425 | yahF      | CDS        |
| O157                 | 389921            | ns                |        | G2583_0426 | yahG      | CDS        |
| O157                 | 390964            | s                 |        | G2583_0426 | yahG      | CDS        |
| O157                 | 392225            | s                 |        | G2583_0428 | yahI      | CDS        |
| CB9615               | 431898            | s                 |        | G2583_0428 | yahI      | CDS        |
| CB9615               | 432970            | ns                |        | G2583_0429 | yahJ      | CDS        |
| CB9615               | 433721            | i                 |        | intergenic |           |            |
| CB9615               | 435536            | ns                |        | G2583_0431 | -         | CDS        |
| O157                 | 396350            | ns                |        | G2583_0432 | -         | CDS        |
| O157                 | 398898            | ns                |        | G2583_0434 | -         | CDS        |
| O157                 | 399826            | s                 |        | G2583_0435 | yahK      | CDS        |
| O157                 | 401607            | ns                |        | G2583_0436 | yahL      | CDS        |
| O157                 | 401721            | i                 |        | intergenic |           |            |
| CB9615               | 441386            | i                 |        | intergenic |           |            |
| O157                 | 402100            | nc                |        | G2583_0437 | -         | tRNA       |
| CB9615               | 441945            | s                 |        | G2583_0439 | yahN      | CDS        |
| CB9615               | 442217            | ns                |        | G2583_0439 | yahN      | CDS        |
| CB9615               | 442641            | i                 |        | intergenic |           |            |
| O157                 | 407749            | s                 |        | G2583_0444 | prpD      | CDS        |
| O157                 | 410978            | ns                |        | G2583_0445 | prpE      | CDS        |
| O55/O157             | 450717            | nc                | rec    | G2583_0446 | nrdB      | pseudogene |
| EDL933               | 411352            | nc                |        | G2583_0446 | nrdB      | pseudogene |
| O55/O157             | 450735            | nc                | rec    | G2583_0446 | nrdB      | pseudogene |
| Sakai                | 411352            | nc                |        | G2583_0446 | nrdB      | pseudogene |
| O55/O157             | 450737            | nc                | rec    | G2583_0446 | nrdB      | pseudogene |

| lineage <sup>a</sup> | site <sup>b</sup> | mutation          |        | gene       | Gene name | Type       |
|----------------------|-------------------|-------------------|--------|------------|-----------|------------|
|                      |                   | type <sup>c</sup> | recomb |            |           |            |
| O55/O157             | 450738            | nc                | rec    | G2583_0446 | nrdB      | pseudogene |
| O157                 | 411933            | s                 |        | G2583_0447 | codB      | CDS        |
| O157                 | 412363            | ns                |        | G2583_0447 | codB      | CDS        |
| O157                 | 413574            | ns                |        | G2583_0448 | codA      | CDS        |
| O157                 | 414499            | i                 |        | intergenic |           |            |
| O157                 | 415011            | ns                |        | G2583_0449 | cynR      | CDS        |
| Sakai                | 415750            | ns                |        | G2583_0450 | cynT      | CDS        |
| O157                 | 421370            | ns                |        | G2583_0455 | lacZ      | CDS        |
| O157                 | 421747            | s                 |        | G2583_0455 | lacZ      | CDS        |
| O157                 | 422932            | s                 |        | G2583_0455 | lacZ      | CDS        |
| EDL933               | 423051            | s                 | rec    | G2583_0455 | lacZ      | CDS        |
| EDL933               | 423122            | i                 | rec    | intergenic |           |            |
| EDL933               | 423143            | i                 | rec    | intergenic |           |            |
| EDL933               | 423149            | i                 | rec    | intergenic |           |            |
| EDL933               | 423183            | i                 | rec    | intergenic |           |            |
| EDL933               | 423233            | s                 | rec    | G2583_0456 | lacI      | CDS        |
| CB9615               | 465651            | s                 |        | G2583_0459 | mhpR      | CDS        |
| O157                 | 427692            | ns                |        | G2583_0460 | mhpA      | CDS        |
| O157                 | 429392            | s                 |        | G2583_0461 | mhpB      | CDS        |
| O157                 | 430636            | s                 |        | G2583_0462 | mhpC      | CDS        |
| Sakai                | 431214            | ns                |        | G2583_0463 | mhpD      | CDS        |
| CB9615               | 471397            | ns                |        | G2583_0464 | mhpF      | CDS        |
| CB9615               | 471930            | ns                |        | G2583_0465 | mhpE      | CDS        |
| O157                 | 435465            | ns                |        | G2583_0467 | yaiL      | CDS        |
| O157                 | 435873            | ns                |        | G2583_0468 | frmB      | CDS        |
| O157                 | 438024            | i                 |        | intergenic |           |            |
| CB9615               | 479501            | s                 |        | G2583_0472 | afuB      | CDS        |
| CB9615               | 479849            | s                 |        | G2583_0472 | afuB      | CDS        |
| O157                 | 440654            | ns                |        | G2583_0472 | afuB      | CDS        |
| CB9615               | 484172            | s                 |        | G2583_0475 | -         | CDS        |
| CB9615               | 485002            | s                 |        | G2583_0476 | -         | CDS        |
| CB9615               | 485360            | s                 |        | G2583_0476 | -         | CDS        |
| O157                 | 446906            | ns                |        | G2583_0477 | tauA      | CDS        |
| CB9615               | 488042            | s                 |        | G2583_0479 | tauC      | CDS        |
| O157                 | 450782            | i                 |        | intergenic |           |            |
| O157                 | 450929            | i                 |        | intergenic |           |            |
| O157                 | 451279            | ns                |        | G2583_0482 | yaiU      | CDS        |
| EDL933               | 451346            | s                 |        | G2583_0482 | yaiU      | CDS        |
| O157                 | 452182            | ns                |        | G2583_0482 | yaiU      | CDS        |
| O157                 | 452571            | s                 |        | G2583_0482 | yaiU      | CDS        |
| CB9615               | 494242            | ns                |        | G2583_0483 | yaiV      | CDS        |
| CB9615               | 495868            | i                 |        | intergenic |           |            |
| O157                 | 456729            | s                 |        | G2583_0485 | sbmA      | CDS        |
| CB9615               | 497548            | ns                |        | G2583_0486 | yaiW      | CDS        |
| CB9615               | 497748            | s                 |        | G2583_0486 | yaiW      | CDS        |

| lineage <sup>a</sup> | site <sup>b</sup> | mutation          |        | gene       | Gene name | Type |
|----------------------|-------------------|-------------------|--------|------------|-----------|------|
|                      |                   | type <sup>c</sup> | recomb |            |           |      |
| CB9615               | 499863            | ns                |        | G2583_0489 | ddlA      | CDS  |
| O157                 | 461082            | i                 |        | intergenic |           |      |
| O157                 | 462752            | s                 |        | G2583_0491 | phoA      | CDS  |
| CB9615               | 503681            | s                 |        | G2583_0493 | adrA      | CDS  |
| O157                 | 467555            | s                 |        | G2583_0498 | aroM      | CDS  |
| CB9615               | 507474            | s                 |        | G2583_0498 | aroM      | CDS  |
| O157                 | 467930            | i                 |        | intergenic |           |      |
| Sakai                | 469824            | ns                |        | G2583_0500 | ydbD      | CDS  |
| O157                 | 471093            | ins               |        | G2583_0501 | -         | CDS  |
| O157                 | 471125            | i                 |        | intergenic |           |      |
| Sakai                | 474603            | ns                |        | G2583_0505 | sbcC      | CDS  |
| O157                 | 474608            | ns                |        | G2583_0505 | sbcC      | CDS  |
| O157                 | 476521            | ns                |        | G2583_0505 | sbcC      | CDS  |
| CB9615               | 516795            | ns                |        | G2583_0505 | sbcC      | CDS  |
| CB9615               | 517616            | ns                |        | G2583_0506 | sbcD      | CDS  |
| CB9615               | 519775            | ns                |        | G2583_0508 | phoR      | CDS  |
| CB9615               | 520247            | s                 |        | G2583_0508 | phoR      | CDS  |
| O157                 | 480831            | ns                |        | G2583_0508 | phoR      | CDS  |
| CB9615               | 525160            | ns                |        | G2583_0511 | malZ      | CDS  |
| CB9615               | 528257            | del               |        | intergenic |           |      |
| O157                 | 490047            | s                 |        | G2583_0515 | tgt       | CDS  |
| O55/O157             | 533850            | indel             |        | intergenic |           |      |
| CB9615               | 540196            | ns                |        | G2583_0528 | thiL      | CDS  |
| O157                 | 501877            | ns                |        | G2583_0530 | -         | CDS  |
| CB9615               | 544052            | i                 |        | intergenic |           |      |
| O157                 | 506173            | s                 |        | G2583_0532 | dxs       | CDS  |
| O157                 | 506245            | i                 |        | intergenic |           |      |
| O157                 | 508776            | ns                |        | G2583_0535 | thiI      | CDS  |
| O157                 | 509818            | ns                |        | G2583_0537 | panE      | CDS  |
| CB9615               | 552748            | s                 |        | G2583_0540 | cyoE      | CDS  |
| O157                 | 513363            | s                 |        | G2583_0540 | cyoE      | CDS  |
| O157                 | 513827            | s                 |        | G2583_0541 | cyoD      | CDS  |
| CB9615               | 555531            | s                 |        | G2583_0543 | cyoB      | CDS  |
| O157                 | 516322            | s                 |        | G2583_0543 | cyoB      | CDS  |
| O157                 | 516850            | ns                |        | G2583_0544 | cyoA      | CDS  |
| Sakai                | 517475            | s                 |        | G2583_0544 | cyoA      | CDS  |
| O157                 | 517703            | i                 |        | intergenic |           |      |
| O157                 | 517886            | i                 |        | intergenic |           |      |
| O157                 | 522313            | s                 |        | G2583_0548 | tig       | CDS  |
| CB9615               | 562235            | ins               |        | intergenic |           |      |
| O157                 | 522905            | s                 |        | G2583_0549 | clpP      | CDS  |
| O157                 | 525668            | s                 |        | G2583_0551 | lon       | CDS  |
| O157                 | 525900            | ns                |        | G2583_0551 | lon       | CDS  |
| O157                 | 526859            | s                 |        | G2583_0551 | lon       | CDS  |
| CB9615               | 569037            | ns                |        | G2583_0553 | ppiD      | CDS  |

| lineage <sup>a</sup> | site <sup>b</sup> | mutation          |        | gene       | Gene name | Type |
|----------------------|-------------------|-------------------|--------|------------|-----------|------|
|                      |                   | type <sup>c</sup> | recomb |            |           |      |
| EDL933               | 529982            | ins               |        | intergenic |           |      |
| O157                 | 533962            | ns                |        | G2583_0558 | cof       | CDS  |
| CB9615               | 574961            | s                 |        | G2583_0560 | mdlA      | CDS  |
| CB9615               | 576982            | ns                |        | G2583_0561 | mdlB      | CDS  |
| CB9615               | 577776            | s                 |        | G2583_0561 | mdlB      | CDS  |
| O157                 | 539520            | s                 |        | G2583_0563 | amtB      | CDS  |
| O157                 | 540081            | s                 |        | G2583_0563 | amtB      | CDS  |
| CB9615               | 580569            | s                 |        | G2583_0564 | tesB      | CDS  |
| O157                 | 541360            | i                 |        | intergenic |           |      |
| CB9615               | 581277            | s                 |        | G2583_0565 | ybaY      | CDS  |
| CB9615               | 582089            | ns                |        | G2583_0566 | ybaZ      | CDS  |
| O157                 | 545398            | i                 |        | intergenic |           |      |
| CB9615               | 585114            | ins               |        | intergenic |           |      |
| O157                 | 545673            | ns                |        | G2583_0571 | maa       | CDS  |
| O157                 | 546138            | i                 |        | intergenic |           |      |
| CB9615               | 586838            | i                 |        | intergenic |           |      |
| O157                 | 548438            | s                 |        | G2583_0574 | acrB      | CDS  |
| O157                 | 550084            | ns                |        | G2583_0574 | acrB      | CDS  |
| O157                 | 552072            | ns                |        | G2583_0576 | acrR      | CDS  |
| O157                 | 553182            | s                 |        | G2583_0577 | kefA      | CDS  |
| O157                 | 556554            | ns                |        | G2583_0579 | priC      | CDS  |
| CB9615               | 596874            | i                 |        | intergenic |           |      |
| O157                 | 557954            | i                 |        | intergenic |           |      |
| O157                 | 561782            | ns                |        | G2583_0585 | htpG      | CDS  |
| CB9615               | 602866            | ns                |        | G2583_0586 | adk       | CDS  |
| CB9615               | 604611            | ns                |        | G2583_0588 | aes       | CDS  |
| O157                 | 565364            | ns                |        | G2583_0588 | aes       | CDS  |
| O157                 | 569170            | del               |        | intergenic |           |      |
| O157                 | 572853            | ns                |        | G2583_0593 | ybaK      | CDS  |
| O157                 | 575527            | s                 |        | G2583_0597 | copA      | CDS  |
| O157                 | 579211            | ns                |        | G2583_0599 | ybaT      | CDS  |
| O157                 | 579703            | i                 |        | intergenic |           |      |
| CB9615               | 620423            | ns                |        | G2583_0600 | -         | CDS  |
| O157                 | 581100            | s                 |        | G2583_0600 | -         | CDS  |
| O157                 | 584229            | s                 |        | G2583_0601 | -         | CDS  |
| CB9615               | 624651            | ns                |        | G2583_0601 | -         | CDS  |
| O157                 | 585736            | ns                |        | G2583_0601 | -         | CDS  |
| O157                 | 585942            | s                 |        | G2583_0601 | -         | CDS  |
| O157                 | 586158            | s                 |        | G2583_0601 | -         | CDS  |
| CB9615               | 627784            | s                 |        | G2583_0601 | -         | CDS  |
| O157                 | 589040            | ns                |        | G2583_0601 | -         | CDS  |
| O157                 | 590150            | ns                |        | G2583_0601 | -         | CDS  |
| O157                 | 590515            | ns                |        | G2583_0601 | -         | CDS  |
| O157                 | 590905            | ns                |        | G2583_0601 | -         | CDS  |
| O157                 | 591849            | s                 |        | G2583_0601 | -         | CDS  |

| lineage <sup>a</sup> | site <sup>b</sup> | mutation          |        | gene       | Gene name | Type       |
|----------------------|-------------------|-------------------|--------|------------|-----------|------------|
|                      |                   | type <sup>c</sup> | recomb |            |           |            |
| O157                 | 591957            | s                 |        | G2583_0601 | -         | CDS        |
| CB9615               | 632912            | ns                |        | G2583_0601 | -         | CDS        |
| O157                 | 593478            | s                 |        | G2583_0601 | -         | CDS        |
| O157                 | 595901            | ns                |        | G2583_0601 | -         | CDS        |
| O157                 | 598277            | ns                |        | G2583_0601 | -         | CDS        |
| EDL933               | 598781            | ns                |        | G2583_0601 | -         | CDS        |
| O157                 | 600475            | ns                |        | G2583_0601 | -         | CDS        |
| O157                 | 600749            | ns                |        | G2583_0601 | -         | CDS        |
| CB9615               | 640777            | s                 |        | G2583_0601 | -         | CDS        |
| CB9615               | 643932            | ns                |        | G2583_0602 | -         | CDS        |
| CB9615               | 647451            | i                 |        | intergenic |           |            |
| O157                 | 613491            | s                 |        | G2583_0614 | tesA      | CDS        |
| O157                 | 615323            | ns                |        | G2583_0616 | ybbP      | CDS        |
| O157                 | 616762            | i                 |        | intergenic |           |            |
| Sakai                | 616828            | i                 | rec    | intergenic |           |            |
| Sakai                | 616829            | i                 | rec    | intergenic |           |            |
| Sakai                | 616890            | i                 | rec    | intergenic |           |            |
| CB9615               | 657107            | nc                |        | G2583_0617 | -         | pseudogene |
| CB9615               | 657395            | nc                |        | G2583_0617 | -         | pseudogene |
| CB9615               | 657780            | ins               |        | G2583_0617 | -         | pseudogene |
| O157                 | 618213            | nc                |        | G2583_0617 | -         | pseudogene |
| CB9615               | 658750            | nc                |        | G2583_0617 | -         | pseudogene |
| EDL933               | 619400            | nc                |        | G2583_0617 | -         | pseudogene |
| Sakai                | 619723            | nc                | rec    | G2583_0617 | -         | pseudogene |
| Sakai                | 619813            | nc                | rec    | G2583_0617 | -         | pseudogene |
| O55/O157             | 660075            | nc                | rec    | G2583_0617 | -         | pseudogene |
| O55/O157             | 660078            | nc                | rec    | G2583_0617 | -         | pseudogene |
| O55/O157             | 660081            | nc                | rec    | G2583_0617 | -         | pseudogene |
| O55/O157             | 660083            | nc                | rec    | G2583_0617 | -         | pseudogene |
| O55/O157             | 660086            | nc                | rec    | G2583_0617 | -         | pseudogene |
| O55/O157             | 660087            | nc                | rec    | G2583_0617 | -         | pseudogene |
| O55/O157             | 660096            | nc                | rec    | G2583_0617 | -         | pseudogene |
| O55/O157             | 660102            | nc                | rec    | G2583_0617 | -         | pseudogene |
| O55/O157             | 660105            | nc                | rec    | G2583_0617 | -         | pseudogene |
| O55/O157             | 660107            | nc                | rec    | G2583_0617 | -         | pseudogene |
| O55/O157             | 660123            | nc                | rec    | G2583_0617 | -         | pseudogene |
| O55/O157             | 660141            | nc                | rec    | G2583_0617 | -         | pseudogene |
| O55/O157             | 660162            | nc                | rec    | G2583_0617 | -         | pseudogene |
| O55/O157             | 660165            | nc                | rec    | G2583_0617 | -         | pseudogene |
| O55/O157             | 660174            | nc                | rec    | G2583_0617 | -         | pseudogene |
| O55/O157             | 660178            | nc                | rec    | G2583_0617 | -         | pseudogene |
| O55/O157             | 660192            | nc                | rec    | G2583_0617 | -         | pseudogene |
| O55/O157             | 660198            | nc                | rec    | G2583_0617 | -         | pseudogene |
| O55/O157             | 660207            | nc                | rec    | G2583_0617 | -         | pseudogene |
| O55/O157             | 660241            | nc                | rec    | G2583_0617 | -         | pseudogene |

| lineage <sup>a</sup> | site <sup>b</sup> | mutation          |        | gene       | Gene name | Type       |
|----------------------|-------------------|-------------------|--------|------------|-----------|------------|
|                      |                   | type <sup>c</sup> | recomb |            |           |            |
| O55/O157             | 660255            | nc                | rec    | G2583_0617 | -         | pseudogene |
| O55/O157             | 660256            | nc                | rec    | G2583_0617 | -         | pseudogene |
| O55/O157             | 660261            | nc                | rec    | G2583_0617 | -         | pseudogene |
| O55/O157             | 660267            | nc                | rec    | G2583_0617 | -         | pseudogene |
| O55/O157             | 660273            | nc                | rec    | G2583_0617 | -         | pseudogene |
| O55/O157             | 660282            | nc                | rec    | G2583_0617 | -         | pseudogene |
| O55/O157             | 660294            | nc                | rec    | G2583_0617 | -         | pseudogene |
| O55/O157             | 660306            | nc                | rec    | G2583_0617 | -         | pseudogene |
| O55/O157             | 660311            | nc                | rec    | G2583_0617 | -         | pseudogene |
| O55/O157             | 660315            | nc                | rec    | G2583_0617 | -         | pseudogene |
| O55/O157             | 660330            | nc                | rec    | G2583_0617 | -         | pseudogene |
| O55/O157             | 660334            | nc                | rec    | G2583_0617 | -         | pseudogene |
| O55/O157             | 660339            | nc                | rec    | G2583_0617 | -         | pseudogene |
| O55/O157             | 660345            | nc                | rec    | G2583_0617 | -         | pseudogene |
| O55/O157             | 660351            | nc                | rec    | G2583_0617 | -         | pseudogene |
| O55/O157             | 660354            | nc                | rec    | G2583_0617 | -         | pseudogene |
| O55/O157             | 660384            | nc                | rec    | G2583_0617 | -         | pseudogene |
| O55/O157             | 660502            | nc                | rec    | G2583_0617 | -         | pseudogene |
| O55/O157             | 660514            | nc                | rec    | G2583_0617 | -         | pseudogene |
| O157                 | 621511            | i                 |        | intergenic |           |            |
| O157                 | 624356            | s                 |        | G2583_0624 | allS      | CDS        |
| CB9615               | 664765            | s                 |        | G2583_0624 | allS      | CDS        |
| O157                 | 624939            | i                 |        | intergenic |           |            |
| CB9615               | 665007            | i                 |        | intergenic |           |            |
| O157                 | 626494            | i                 |        | intergenic |           |            |
| O157                 | 626496            | i                 |        | intergenic |           |            |
| O157                 | 628605            | ns                |        | G2583_0628 | hyi       | CDS        |
| O157                 | 632543            | ns                |        | G2583_0632 | allB      | CDS        |
| Sakai                | 632644            | ns                |        | G2583_0632 | allB      | CDS        |
| CB9615               | 673092            | ns                |        | G2583_0633 | ybbY      | CDS        |
| O157                 | 634437            | s                 |        | G2583_0634 | glxK      | CDS        |
| O157                 | 637417            | s                 |        | G2583_0636 | allC      | CDS        |
| O157                 | 637672            | ns                |        | G2583_0636 | allC      | CDS        |
| O157                 | 641846            | ns                |        | G2583_0639 | ylbE      | CDS        |
| O157                 | 643644            | ns                |        | G2583_0641 | ybcF      | CDS        |
| O157                 | 643984            | ns                |        | G2583_0642 | purK      | CDS        |
| O157                 | 644714            | ns                |        | G2583_0642 | purK      | CDS        |
| O157                 | 645862            | s                 |        | G2583_0644 | lpxH      | CDS        |
| CB9615               | 686819            | s                 |        | G2583_0645 | ppiB      | CDS        |
| CB9615               | 688431            | s                 |        | G2583_0646 | cysS      | CDS        |
| Sakai                | 648904            | s                 |        | G2583_0647 | ybcI      | CDS        |
| O157                 | 650331            | del-9             |        | intergenic |           |            |
| CB9615               | 690361            | i                 |        | intergenic |           |            |
| O157                 | 651644            | s                 |        | G2583_0651 | sfmC      | CDS        |
| CB9615               | 691836            | ns                |        | G2583_0651 | sfmC      | CDS        |

| lineage <sup>a</sup> | mutation          |                   | recomb | gene       | Gene name | Type       |
|----------------------|-------------------|-------------------|--------|------------|-----------|------------|
|                      | site <sup>b</sup> | type <sup>c</sup> |        |            |           |            |
| O157                 | 652297            | ns                |        | G2583_0652 | sfmD      | CDS        |
| CB9615               | 692684            | ns                |        | G2583_0652 | sfmD      | CDS        |
| CB9615               | 693275            | ns                |        | G2583_0652 | sfmD      | CDS        |
| CB9615               | 696482            | s                 |        | G2583_0655 | fimZ      | CDS        |
| CB9615               | 696808            | ns                |        | G2583_0655 | fimZ      | CDS        |
| CB9615               | 750817            | s                 |        | G2583_0722 | nfrA      | CDS        |
| O157                 | 661587            | s                 |        | G2583_0722 | nfrA      | CDS        |
| O157                 | 661812            | s                 |        | G2583_0722 | nfrA      | CDS        |
| O157                 | 662515            | s                 |        | G2583_0723 | nfrB      | CDS        |
| CB9615               | 754142            | ns                |        | G2583_0724 | yhhl      | CDS        |
| O157                 | 664909            | ns                |        | G2583_0724 | yhhl      | CDS        |
| O157                 | 665627            | s                 |        | G2583_0724 | yhhl      | CDS        |
| CB9615               | 755901            | ns                |        | G2583_0726 | -         | CDS        |
| CB9615               | 756288            | ns                |        | G2583_0726 | -         | CDS        |
| O157                 | 667651            | i                 |        | intergenic |           |            |
| EDL933               | 667568            | ins               |        | G2583_0727 | -         | CDS        |
| O55/O157             | 757306            | ns                |        | G2583_0727 | -         | CDS        |
| O55/O157             | 757436            | ns                |        | G2583_0727 | -         | CDS        |
| O55/O157             | 757561            | ns                |        | G2583_0728 | -         | CDS        |
| CB9615               | 759261            | ns                |        | G2583_0728 | -         | CDS        |
| O157                 | 670048            | s                 |        | G2583_0728 | -         | CDS        |
| CB9615               | 759482            | s                 |        | G2583_0728 | -         | CDS        |
| O157                 | 670647            | ns                |        | G2583_0728 | -         | CDS        |
| O157                 | 670745            | ns                |        | G2583_0728 | -         | CDS        |
| CB9615               | 761058            | ns                |        | G2583_0728 | -         | CDS        |
| CB9615               | 762767            | nc                |        | G2583_0729 | -         | pseudogene |
| CB9615               | 763612            | ns                |        | G2583_0730 | -         | CDS        |
| CB9615               | 765307            | i                 |        | intergenic |           |            |
| CB9615               | 768773            | s                 |        | G2583_0733 | cusC      | CDS        |
| CB9615               | 769240            | s                 |        | G2583_0734 | cusF      | CDS        |
| EDL933               | 680741            | ns                |        | G2583_0735 | cusB      | CDS        |
| CB9615               | 770955            | s                 |        | G2583_0736 | cusA      | CDS        |
| CB9615               | 771395            | ns                |        | G2583_0736 | cusA      | CDS        |
| O157                 | 682092            | del-6             |        | G2583_0736 | cusA      | CDS        |
| CB9615               | 772873            | ns                |        | G2583_0736 | cusA      | CDS        |
| O157                 | 684162            | ns                |        | G2583_0736 | cusA      | CDS        |
| CB9615               | 774965            | s                 |        | G2583_0737 | pheP      | CDS        |
| CB9615               | 776713            | i                 |        | intergenic |           |            |
| O157                 | 696262            | s                 |        | G2583_0749 | entF      | CDS        |
| O157                 | 697011            | ns                |        | G2583_0749 | entF      | CDS        |
| O157                 | 697087            | s                 |        | G2583_0749 | entF      | CDS        |
| EDL933               | 696914            | s                 |        | G2583_0749 | entF      | CDS        |
| CB9615               | 786962            | s                 |        | G2583_0749 | entF      | CDS        |
| O157                 | 699238            | s                 |        | G2583_0749 | entF      | CDS        |
| EDL933               | 699494            | i                 |        | intergenic |           |            |

| lineage <sup>a</sup> | site <sup>b</sup> | mutation          |        | gene       | Gene name | Type       |
|----------------------|-------------------|-------------------|--------|------------|-----------|------------|
|                      |                   | type <sup>c</sup> | recomb |            |           |            |
| EDL933               | 700558            | s                 |        | G2583_0750 | fepE      | CDS        |
| O157                 | 702532            | s                 |        | G2583_0752 | fepG      | CDS        |
| O157                 | 705845            | ns                |        | G2583_0755 | fepB      | CDS        |
| O157                 | 710900            | ns                |        | G2583_0760 | ybdB      | CDS        |
| O55/O157             | 802986            | i                 |        | intergenic |           |            |
| O157                 | 714341            | s                 |        | G2583_0763 | ybdH      | CDS        |
| CB9615               | 804688            | ns                |        | G2583_0764 | ybdL      | CDS        |
| O157                 | 717679            | s                 |        | G2583_0766 | ybdN      | CDS        |
| CB9615               | 807588            | i                 |        | intergenic |           |            |
| O157                 | 723657            | s                 |        | G2583_0772 | ybdR      | CDS        |
| CB9615               | 816974            | ns                |        | G2583_0776 | citT      | CDS        |
| O157                 | 727629            | s                 |        | G2583_0776 | citT      | CDS        |
| O157                 | 727975            | i                 |        | intergenic |           |            |
| CB9615               | 817704            | s                 |        | G2583_0777 | citG      | CDS        |
| CB9615               | 818339            | ns                |        | G2583_0778 | citX      | CDS        |
| O157                 | 730066            | ns                |        | G2583_0779 | citF      | CDS        |
| O157                 | 730645            | ns                |        | G2583_0779 | citF      | CDS        |
| Sakai                | 730801            | ns                |        | G2583_0779 | citF      | CDS        |
| O157                 | 730987            | s                 |        | G2583_0780 | citE      | CDS        |
| O157                 | 731710            | ns                |        | G2583_0780 | citE      | CDS        |
| O157                 | 732424            | ns                |        | G2583_0782 | citC      | CDS        |
| O157                 | 733443            | i                 |        | intergenic |           |            |
| O157                 | 733807            | ns                |        | G2583_0783 | dpiB      | CDS        |
| CB9615               | 824795            | nc                | rec    | G2583_0784 | dpiA      | pseudogene |
| CB9615               | 824813            | nc                | rec    | G2583_0784 | dpiA      | pseudogene |
| CB9615               | 824867            | nc                | rec    | G2583_0784 | dpiA      | pseudogene |
| CB9615               | 824868            | nc                | rec    | G2583_0784 | dpiA      | pseudogene |
| CB9615               | 824869            | nc                | rec    | G2583_0784 | dpiA      | pseudogene |
| CB9615               | 824869            | del               | rec    | G2583_0784 | dpiA      | pseudogene |
| O157                 | 736937            | s                 |        | G2583_0785 | dcuC      | CDS        |
| CB9615               | 827006            | i                 |        | intergenic |           |            |
| O157                 | 737698            | i                 |        | intergenic |           |            |
| O157                 | 737842            | i                 |        | intergenic |           |            |
| CB9615               | 827310            | i                 |        | intergenic |           |            |
| O157                 | 738521            | i                 |        | intergenic |           |            |
| EDL933               | 738685            | del               |        | intergenic |           |            |
| O157                 | 739778            | s                 |        | G2583_0789 | ybeM      | CDS        |
| Sakai                | 745039            | ns                |        | G2583_0795 | dacA      | CDS        |
| CB9615               | 835047            | ns                |        | G2583_0796 | rlpA      | CDS        |
| O157                 | 752015            | ns                |        | G2583_0803 | holA      | CDS        |
| O157                 | 752996            | s                 |        | G2583_0804 | rlpB      | CDS        |
| CB9615               | 844264            | s                 |        | G2583_0805 | leuS      | CDS        |
| O157                 | 757752            | ns                |        | G2583_0807 | ybeQ      | CDS        |
| O157                 | 760739            | ns                |        | G2583_0810 | ybeT      | CDS        |
| CB9615               | 850331            | ns                |        | G2583_0811 | ybeU      | CDS        |



| lineage <sup>a</sup> | site <sup>b</sup> | mutation          |        | gene       | Gene name | Type       |
|----------------------|-------------------|-------------------|--------|------------|-----------|------------|
|                      |                   | type <sup>c</sup> | recomb |            |           |            |
| CB9615               | 851059            | i                 |        | intergenic |           |            |
| CB9615               | 851562            | nc                |        | G2583_0812 | ybeV      | pseudogene |
| CB9615               | 852623            | ns                |        | G2583_0813 | hscC      | CDS        |
| O157                 | 764010            | ns                |        | G2583_0813 | hscC      | CDS        |
| O157                 | 770408            | ns                |        | G2583_0820 | Int       | CDS        |
| CB9615               | 860210            | ns                |        | G2583_0820 | Int       | CDS        |
| O157                 | 772229            | ns                |        | G2583_0822 | ybeY      | CDS        |
| O157                 | 772916            | s                 |        | G2583_0823 | ybeZ      | CDS        |
| CB9615               | 865961            | i                 |        | intergenic |           |            |
| O157                 | 779527            | i                 |        | intergenic |           |            |
| O157                 | 780083            | s                 |        | G2583_0836 | nagD      | CDS        |
| O157                 | 783818            | i                 |        | intergenic |           |            |
| CB9615               | 873700            | ns                |        | G2583_0840 | nagE      | CDS        |
| O157                 | 786941            | s                 |        | G2583_0841 | glnS      | CDS        |
| O157                 | 788796            | del               |        | G2583_0842 | ybfM      | CDS        |
| CB9615               | 878266            | ns                |        | G2583_0842 | ybfM      | CDS        |
| Sakai                | 789194            | s                 |        | G2583_0842 | ybfM      | CDS        |
| EDL933               | 790462            | ins               |        | intergenic |           |            |
| EDL933               | 790526            | ins               |        | intergenic |           |            |
| O157                 | 791773            | s                 |        | G2583_0846 | ybfE      | CDS        |
| O157                 | 792567            | ns                |        | G2583_0847 | ybfF      | CDS        |
| O157                 | 794606            | ns                |        | G2583_0849 | pgm       | CDS        |
| O157                 | 794988            | s                 |        | G2583_0849 | pgm       | CDS        |
| CB9615               | 886808            | s                 |        | G2583_0851 | speF      | CDS        |
| CB9615               | 888855            | i                 |        | intergenic |           |            |
| O157                 | 802184            | ns                |        | G2583_0853 | kdpD      | CDS        |
| O157                 | 802852            | s                 |        | G2583_0854 | kdpC      | CDS        |
| O157                 | 802855            | s                 |        | G2583_0854 | kdpC      | CDS        |
| O157                 | 807079            | s                 |        | G2583_0856 | kdpA      | CDS        |
| CB9615               | 896878            | i                 |        | intergenic |           |            |
| CB9615               | 897278            | i                 |        | intergenic |           |            |
| O157                 | 808007            | del               |        | intergenic |           |            |
| O157                 | 808068            | s                 |        | G2583_0859 | -         | CDS        |
| O157                 | 808161            | s                 |        | G2583_0859 | -         | CDS        |
| O157                 | 808211            | ns                |        | G2583_0859 | -         | CDS        |
| CB9615               | 898304            | ns                |        | G2583_0859 | -         | CDS        |
| EDL933               | 809606            | s                 |        | G2583_0859 | -         | CDS        |
| CB9615               | 899511            | ns                |        | G2583_0859 | -         | CDS        |
| O55/O157             | 900304            | s                 | rec    | G2583_0859 | -         | CDS        |
| O55/O157             | 900361            | s                 | rec    | G2583_0859 | -         | CDS        |
| O55/O157             | 900364            | s                 | rec    | G2583_0859 | -         | CDS        |
| O55/O157             | 900423            | ns                | rec    | G2583_0859 | -         | CDS        |
| O55/O157             | 900580            | s                 | rec    | G2583_0859 | -         | CDS        |
| O55/O157             | 900595            | s                 | rec    | G2583_0859 | -         | CDS        |
| O55/O157             | 900597            | ns                | rec    | G2583_0859 | -         | CDS        |

| lineage <sup>a</sup> | site <sup>b</sup> | mutation          |        | gene       | Gene name | Type |
|----------------------|-------------------|-------------------|--------|------------|-----------|------|
|                      |                   | type <sup>c</sup> | recomb |            |           |      |
| O55/O157             | 900649            | s                 | rec    | G2583_0859 | -         | CDS  |
| O55/O157             | 900655            | s                 | rec    | G2583_0859 | -         | CDS  |
| O55/O157             | 900940            | s                 | rec    | G2583_0859 | rhsC      | CDS  |
| O55/O157             | 900949            | s                 | rec    | G2583_0859 | rhsC      | CDS  |
| O55/O157             | 900951            | ns                | rec    | G2583_0859 | rhsC      | CDS  |
| O55/O157             | 900961            | s                 | rec    | G2583_0859 | rhsC      | CDS  |
| O55/O157             | 900988            | s                 | rec    | G2583_0859 | rhsC      | CDS  |
| O55/O157             | 901016            | ns                | rec    | G2583_0859 | rhsC      | CDS  |
| O55/O157             | 901021            | s                 | rec    | G2583_0859 | rhsC      | CDS  |
| O55/O157             | 901036            | s                 | rec    | G2583_0859 | rhsC      | CDS  |
| O55/O157             | 901051            | s                 | rec    | G2583_0859 | rhsC      | CDS  |
| O157                 | 812228            | ins               |        | G2583_0860 | ybfC      | CDS  |
| CB9615               | 901936            | ns                |        | G2583_0860 | ybfC      | CDS  |
| Sakai                | 812703            | s                 |        | G2583_0860 | ybfC      | CDS  |
| O157                 | 813195            | i                 |        | intergenic |           |      |
| CB9615               | 902798            | i                 |        | intergenic |           |      |
| CB9615               | 902830            | ins               |        | intergenic |           |      |
| O157                 | 814208            | i                 |        | intergenic |           |      |
| O55/O157             | 903884            | ns                | rec    | G2583_0861 | yhhl      | CDS  |
| O55/O157             | 903930            | s                 | rec    | G2583_0861 | yhhl      | CDS  |
| O55/O157             | 904195            | ns                | rec    | G2583_0861 | yhhl      | CDS  |
| O55/O157             | 904288            | ns                | rec    | G2583_0861 | yhhl      | CDS  |
| O55/O157             | 904289            | ns                | rec    | G2583_0861 | yhhl      | CDS  |
| O55/O157             | 904293            | s                 | rec    | G2583_0861 | yhhl      | CDS  |
| O55/O157             | 904308            | ns                | rec    | G2583_0861 | yhhl      | CDS  |
| O55/O157             | 904350            | s                 | rec    | G2583_0861 | yhhl      | CDS  |
| O55/O157             | 904500            | ns                | rec    | G2583_0861 | yhhl      | CDS  |
| O55/O157             | 904551            | ns                | rec    | G2583_0861 | yhhl      | CDS  |
| O55/O157             | 904657            | ns                | rec    | G2583_0861 | yhhl      | CDS  |
| O55/O157             | 904703            | ns                | rec    | G2583_0861 | yhhl      | CDS  |
| O55/O157             | 904789            | ns                | rec    | G2583_0861 | yhhl      | CDS  |
| O55/O157             | 904794            | s                 | rec    | G2583_0861 | yhhl      | CDS  |
| O157                 | 816243            | ns                |        | G2583_0863 | phr       | CDS  |
| CB9615               | 908396            | ns                |        | G2583_0864 | ybgH      | CDS  |
| O157                 | 822101            | s                 |        | G2583_0868 | ybgL      | CDS  |
| O157                 | 823452            | ns                |        | G2583_0870 | abrB      | CDS  |
| CB9615               | 914500            | ns                |        | G2583_0871 | ybgO      | CDS  |
| O157                 | 825854            | ns                |        | G2583_0872 | ybgP      | CDS  |
| O157                 | 826657            | ns                |        | G2583_0873 | ybgQ      | CDS  |
| CB9615               | 916869            | ns                |        | G2583_0873 | ybgQ      | CDS  |
| O157                 | 827559            | s                 |        | G2583_0873 | ybgQ      | CDS  |
| O157                 | 827934            | s                 |        | G2583_0873 | ybgQ      | CDS  |
| O157                 | 833994            | s                 |        | G2583_0878 | sdhA      | CDS  |
| CB9615               | 925663            | s                 |        | G2583_0881 | sucA      | CDS  |
| CB9615               | 933088            | del               |        | intergenic |           |      |

| lineage <sup>a</sup> | mutation          |                   | recomb | gene       | Gene name | Type       |
|----------------------|-------------------|-------------------|--------|------------|-----------|------------|
|                      | site <sup>b</sup> | type <sup>c</sup> |        |            |           |            |
| CB9615               | 935650            | s                 |        | G2583_0889 | -         | CDS        |
| CB9615               | 935664            | ns                |        | G2583_0889 | -         | CDS        |
| O157                 | 853320            | i                 |        | intergenic |           |            |
| CB9615               | 942938            | i                 |        | intergenic |           |            |
| CB9615               | 943839            | nc                |        | G2583_0898 | -         | pseudogene |
| CB9615               | 943855            | del               |        | G2583_0898 | -         | pseudogene |
| O157                 | 854873            | nc                |        | G2583_0898 | -         | pseudogene |
| CB9615               | 946770            | ns                |        | G2583_0899 | cydA      | CDS        |
| CB9615               | 951871            | ns                |        | G2583_0907 | tolB      | CDS        |
| O157                 | 865136            | nc                |        | G2583_0911 | -         | tRNA       |
| O157                 | 865341            | nc                |        | G2583_0913 | -         | tRNA       |
| CB9615               | 955899            | ns                |        | G2583_0916 | nadA      | CDS        |
| CB9615               | 956193            | ns                |        | G2583_0916 | nadA      | CDS        |
| O157                 | 867563            | s                 |        | G2583_0917 | pnuC      | CDS        |
| EDL933               | 870326            | del-6             |        | G2583_0918 | zitB      | CDS        |
| CB9615               | 959012            | ins               |        | intergenic |           |            |
| CB9615               | 961804            | ns                |        | G2583_0922 | galM      | CDS        |
| CB9615               | 963826            | s                 |        | G2583_0924 | galT      | CDS        |
| O157                 | 875910            | s                 |        | G2583_0925 | galE      | CDS        |
| O157                 | 876026            | i                 |        | intergenic |           |            |
| O157                 | 879561            | s                 |        | G2583_0929 | modA      | CDS        |
| CB9615               | 969444            | s                 |        | G2583_0930 | modB      | CDS        |
| O157                 | 881973            | ns                |        | G2583_0932 | ybhA      | CDS        |
| O157                 | 883849            | s                 |        | G2583_0934 | ybhD      | CDS        |
| EDL933               | 887390            | ins               |        | intergenic |           |            |
| CB9615               | 976003            | s                 |        | G2583_0936 | ybhI      | CDS        |
| CB9615               | 977223            | s                 |        | G2583_0937 | ybhJ      | CDS        |
| O157                 | 888327            | s                 |        | G2583_0937 | ybhJ      | CDS        |
| CB9615               | 978266            | ns                |        | G2583_0937 | ybhJ      | CDS        |
| O157                 | 888915            | ns                |        | G2583_0937 | ybhJ      | CDS        |
| O157                 | 889133            | ns                |        | G2583_0937 | ybhJ      | CDS        |
| CB9615               | 980592            | s                 |        | G2583_0938 | ybhC      | CDS        |
| EDL933               | 893627            | ins               |        | G2583_0939 | intE      | CDS        |
| O157                 | 892201            | del-4             |        | G2583_0939 | intE      | CDS        |
| Sakai                | 892952            | s                 |        | G2583_0942 | -         | CDS        |
| O157                 | 893023            | ns                |        | G2583_0942 | -         | CDS        |
| O55/O157             | 983399            | s                 | rec    | G2583_0943 | -         | CDS        |
| O55/O157             | 983406            | ns                | rec    | G2583_0943 | -         | CDS        |
| O55/O157             | 983408            | s                 | rec    | G2583_0943 | -         | CDS        |
| O55/O157             | 983417            | s                 | rec    | G2583_0943 | -         | CDS        |
| O55/O157             | 983472            | ns                | rec    | G2583_0943 | -         | CDS        |
| O55/O157             | 983579            | i                 | rec    | intergenic |           |            |
| O55/O157             | 983668            | s                 | rec    | G2583_0944 | -         | CDS        |
| O55/O157             | 983777            | ns                | rec    | G2583_0944 | -         | CDS        |
| EDL933               | 896580            | s                 |        | G2583_0946 | -         | CDS        |

| lineage <sup>a</sup> | site <sup>b</sup> | mutation          |        | gene       | Gene name | Type       |
|----------------------|-------------------|-------------------|--------|------------|-----------|------------|
|                      |                   | type <sup>c</sup> | recomb |            |           |            |
| CB9615               | 985295            | s                 |        | G2583_0947 | bet       | CDS        |
| CB9615               | 985600            | ns                |        | G2583_0947 | bet       | CDS        |
| O157                 | 896277            | s                 |        | G2583_0962 | NinF      | CDS        |
| O157                 | 896389            | ns                |        | G2583_0962 | NinF      | CDS        |
| O157                 | 896669            | ns                |        | G2583_0963 | NinG      | CDS        |
| EDL933               | 898725            | del               |        | G2583_0964 | -         | CDS        |
| EDL933               | 898803            | del               |        | G2583_0964 | -         | CDS        |
| EDL933               | 898821            | del               |        | G2583_0964 | -         | CDS        |
| CB9615               | 995731            | ns                |        | G2583_0965 | -         | CDS        |
| O157                 | 898910            | i                 |        | intergenic |           |            |
| CB9615               | 995981            | i                 |        | intergenic |           |            |
| O157                 | 899053            | del               |        | intergenic |           |            |
| CB9615               | 996158            | del               |        | intergenic |           |            |
| Sakai/EDL933         | 901704            | indel             |        | intergenic |           |            |
| CB9615               | 997114            | ins-2             |        | intergenic |           |            |
| O157                 | 902073            | ns                |        | G2583_0970 | ybcS      | CDS        |
| O157                 | 902570            | ns                |        | G2583_0971 | -         | CDS        |
| CB9615               | 1000575           | ns                |        | G2583_0973 | -         | CDS        |
| CB9615               | 1002051           | ns                |        | G2583_0975 | -         | CDS        |
| CB9615               | 1004630           | ns                |        | G2583_0977 | -         | CDS        |
| O157                 | 907623            | ns                |        | G2583_0977 | -         | CDS        |
| O157                 | 907629            | ins               |        | G2583_0977 | -         | CDS        |
| O157                 | 908248            | nc                |        | G2583_0978 | clpP      | pseudogene |
| CB9615               | 1006082           | nc                |        | G2583_0978 | clpP      | pseudogene |
| O157                 | 910873            | ns                |        | G2583_0981 | -         | CDS        |
| O157                 | 912752            | s                 |        | G2583_0984 | -         | CDS        |
| CB9615               | 1011066           | s                 |        | G2583_0986 | -         | CDS        |
| CB9615               | 1012126           | ns                |        | G2583_0986 | -         | CDS        |
| O157                 | 915220            | ns                |        | G2583_0986 | -         | CDS        |
| CB9615               | 1013262           | ns                |        | G2583_0986 | -         | CDS        |
| CB9615               | 1013575           | ns                |        | G2583_0987 | -         | CDS        |
| O55/O157             | 1013897           | s                 | rec    | G2583_0988 | -         | CDS        |
| O55/O157             | 1013910           | ns                | rec    | G2583_0988 | -         | CDS        |
| O55/O157             | 1014101           | s                 | rec    | G2583_0988 | -         | CDS        |
| O55/O157             | 1014122           | s                 | rec    | G2583_0988 | -         | CDS        |
| O55/O157             | 1014137           | s                 | rec    | G2583_0988 | -         | CDS        |
| O55/O157             | 1014155           | s                 | rec    | G2583_0988 | -         | CDS        |
| O55/O157             | 1014167           | s                 | rec    | G2583_0988 | -         | CDS        |
| O55/O157             | 1014227           | s                 | rec    | G2583_0988 | -         | CDS        |
| O55/O157             | 1014254           | s                 | rec    | G2583_0988 | -         | CDS        |
| O55/O157             | 1014278           | s                 | rec    | G2583_0988 | -         | CDS        |
| O55/O157             | 1014320           | s                 | rec    | G2583_0988 | -         | CDS        |
| O55/O157             | 1014323           | s                 | rec    | G2583_0988 | -         | CDS        |
| O55/O157             | 1014332           | s                 | rec    | G2583_0988 | -         | CDS        |
| O55/O157             | 1014342           | ns                | rec    | G2583_0988 | -         | CDS        |

| lineage <sup>a</sup> | site <sup>b</sup> | mutation          |        | gene            | Gene name | Type |
|----------------------|-------------------|-------------------|--------|-----------------|-----------|------|
|                      |                   | type <sup>c</sup> | recomb |                 |           |      |
| O55/O157             | 1014383           | s                 | rec    | G2583_0988      | -         | CDS  |
| O55/O157             | 1014388           | s                 | rec    | G2583_0988-0989 | -         | CDS  |
| O55/O157             | 1014401           | ns                | rec    | G2583_0989      | -         | CDS  |
| O55/O157             | 1014469           | s                 | rec    | G2583_0989      | -         | CDS  |
| O55/O157             | 1014472           | ns                | rec    | G2583_0989      | -         | CDS  |
| O55/O157             | 1014481           | s                 | rec    | G2583_0989      | -         | CDS  |
| O55/O157             | 1014496           | s                 | rec    | G2583_0989      | -         | CDS  |
| O55/O157             | 1014538           | s                 | rec    | G2583_0989      | -         | CDS  |
| O55/O157             | 1014550           | s                 | rec    | G2583_0989      | -         | CDS  |
| O55/O157             | 1014551           | ns                | rec    | G2583_0989      | -         | CDS  |
| O55/O157             | 1014561           | ns                | rec    | G2583_0989      | -         | CDS  |
| O55/O157             | 1014568           | s                 | rec    | G2583_0989      | -         | CDS  |
| O55/O157             | 1014688           | s                 | rec    | G2583_0989      | -         | CDS  |
| O55/O157             | 1014689           | ns                | rec    | G2583_0989      | -         | CDS  |
| O55/O157             | 1014690           | ns                | rec    | G2583_0989      | -         | CDS  |
| O55/O157             | 1014721           | s                 | rec    | G2583_0989      | -         | CDS  |
| O55/O157             | 1014781           | s                 | rec    | G2583_0989      | -         | CDS  |
| O55/O157             | 1014836           | ns                | rec    | G2583_0989      | -         | CDS  |
| O55/O157             | 1014899           | ns                | rec    | G2583_0989      | -         | CDS  |
| O55/O157             | 1014901           | ns                | rec    | G2583_0989      | -         | CDS  |
| O55/O157             | 1014904           | s                 | rec    | G2583_0989      | -         | CDS  |
| O55/O157             | 1014907           | s                 | rec    | G2583_0989      | -         | CDS  |
| O55/O157             | 1014919           | s                 | rec    | G2583_0989      | -         | CDS  |
| O55/O157             | 1014976           | s                 | rec    | G2583_0989      | -         | CDS  |
| O55/O157             | 1015080           | ns                | rec    | G2583_0989-0990 | -         | CDS  |
| O55/O157             | 1015104           | ns                | rec    | G2583_0989-0990 | -         | CDS  |
| O55/O157             | 1015217           | ns                | rec    | G2583_0990      | -         | CDS  |
| O55/O157             | 1015260           | s                 | rec    | G2583_0990      | -         | CDS  |
| O55/O157             | 1015261           | ns                | rec    | G2583_0990      | -         | CDS  |
| O55/O157             | 1015293           | s                 | rec    | G2583_0990      | -         | CDS  |
| O55/O157             | 1015326           | s                 | rec    | G2583_0990      | -         | CDS  |
| O55/O157             | 1015521           | s                 | rec    | G2583_0990      | -         | CDS  |
| O55/O157             | 1015524           | s                 | rec    | G2583_0990      | -         | CDS  |
| O55/O157             | 1015527           | s                 | rec    | G2583_0990      | -         | CDS  |
| O55/O157             | 1015554           | s                 | rec    | G2583_0990      | -         | CDS  |
| O55/O157             | 1015581           | s                 | rec    | G2583_0990      | -         | CDS  |
| O55/O157             | 1015608           | s                 | rec    | G2583_0990      | -         | CDS  |
| O55/O157             | 1015617           | s                 | rec    | G2583_0990      | -         | CDS  |
| O55/O157             | 1015620           | s                 | rec    | G2583_0990      | -         | CDS  |
| O55/O157             | 1015647           | s                 | rec    | G2583_0990      | -         | CDS  |
| O55/O157             | 1015680           | s                 | rec    | G2583_0990      | -         | CDS  |
| O55/O157             | 1015686           | i                 | rec    | intergenic      |           |      |
| O55/O157             | 1015691           | i                 | rec    | intergenic      |           |      |
| O55/O157             | 1015712           | i                 | rec    | intergenic      |           |      |
| O55/O157             | 1015730           | i                 | rec    | intergenic      |           |      |

| lineage <sup>a</sup> | site <sup>b</sup> | mutation          |        | gene       | Gene name | Type |
|----------------------|-------------------|-------------------|--------|------------|-----------|------|
|                      |                   | type <sup>c</sup> | recomb |            |           |      |
| O55/O157             | 1015737           | i                 | rec    | intergenic |           |      |
| O55/O157             | 1015741           | i                 | rec    | intergenic |           |      |
| O55/O157             | 1015755           | s                 | rec    | G2583_0991 | -         | CDS  |
| O55/O157             | 1015800           | s                 | rec    | G2583_0991 | -         | CDS  |
| O55/O157             | 1015803           | s                 | rec    | G2583_0991 | -         | CDS  |
| O55/O157             | 1015804           | ns                | rec    | G2583_0991 | -         | CDS  |
| O55/O157             | 1015806           | ns                | rec    | G2583_0991 | -         | CDS  |
| O55/O157             | 1015810           | ns                | rec    | G2583_0991 | -         | CDS  |
| O55/O157             | 1015818           | s                 | rec    | G2583_0991 | -         | CDS  |
| O55/O157             | 1015824           | s                 | rec    | G2583_0991 | -         | CDS  |
| O55/O157             | 1015827           | s                 | rec    | G2583_0991 | -         | CDS  |
| CB9615               | 1015896           | s                 |        | G2583_0991 | -         | CDS  |
| EDL933               | 920975            | ins               |        | G2583_0991 | -         | CDS  |
| EDL933               | 920981            | ins               |        | G2583_0991 | -         | CDS  |
| EDL933               | 920987            | ins               |        | G2583_0991 | -         | CDS  |
| CB9615               | 1016982           | s                 |        | G2583_0991 | -         | CDS  |
| EDL933               | 921815            | ns                | rec    | G2583_0991 | -         | CDS  |
| EDL933               | 921816            | ns                | rec    | G2583_0991 | -         | CDS  |
| EDL933               | 921821            | ns                | rec    | G2583_0991 | -         | CDS  |
| EDL933               | 921844            | ns                | rec    | G2583_0991 | -         | CDS  |
| EDL933               | 921883            | ns                | rec    | G2583_0991 | -         | CDS  |
| EDL933               | 921987            | s                 | rec    | G2583_0991 | -         | CDS  |
| O55/O157             | 1018440           | s                 | rec    | G2583_0991 | -         | CDS  |
| O55/O157             | 1018443           | s                 | rec    | G2583_0991 | -         | CDS  |
| O55/O157             | 1018569           | s                 | rec    | G2583_0991 | -         | CDS  |
| O55/O157             | 1018571           | ns                | rec    | G2583_0991 | -         | CDS  |
| O55/O157             | 1018575           | s                 | rec    | G2583_0991 | -         | CDS  |
| O55/O157             | 1018651           | ns                | rec    | G2583_0991 | -         | CDS  |
| O55/O157             | 1018668           | s                 | rec    | G2583_0991 | -         | CDS  |
| O55/O157             | 1019133           | s                 | rec    | G2583_0991 | -         | CDS  |
| O55/O157             | 1019151           | s                 | rec    | G2583_0991 | -         | CDS  |
| O55/O157             | 1019161           | i                 | rec    | intergenic |           |      |
| O55/O157             | 1019162           | i                 | rec    | intergenic |           |      |
| O55/O157             | 1019172           | i                 | rec    | intergenic |           |      |
| O55/O157             | 1019173           | i                 | rec    | intergenic |           |      |
| O55/O157             | 1019177           | indel             | rec    | intergenic |           |      |
| O55/O157             | 1019182           | i                 | rec    | intergenic |           |      |
| O55/O157             | 1019193           | i                 | rec    | intergenic |           |      |
| O55/O157             | 1019214           | i                 | rec    | intergenic |           |      |
| O55/O157             | 1019217           | i                 | rec    | intergenic |           |      |
| O55/O157             | 1019236           | ns                | rec    | G2583_0992 | -         | CDS  |
| O55/O157             | 1019240           | ns                | rec    | G2583_0992 | -         | CDS  |
| O55/O157             | 1019244           | s                 | rec    | G2583_0992 | -         | CDS  |
| O55/O157             | 1019247           | s                 | rec    | G2583_0992 | -         | CDS  |
| O55/O157             | 1019253           | ns                | rec    | G2583_0992 | -         | CDS  |

| lineage <sup>a</sup> | site <sup>b</sup> | mutation          |        | gene       | Gene name | Type |
|----------------------|-------------------|-------------------|--------|------------|-----------|------|
|                      |                   | type <sup>c</sup> | recomb |            |           |      |
| O55/O157             | 1019274           | s                 | rec    | G2583_0992 | -         | CDS  |
| O55/O157             | 1019285           | ns                | rec    | G2583_0992 | -         | CDS  |
| O55/O157             | 1019298           | s                 | rec    | G2583_0992 | -         | CDS  |
| O55/O157             | 1019304           | s                 | rec    | G2583_0992 | -         | CDS  |
| O55/O157             | 1019325           | s                 | rec    | G2583_0992 | -         | CDS  |
| O55/O157             | 1019328           | s                 | rec    | G2583_0992 | -         | CDS  |
| O55/O157             | 1019341           | s                 | rec    | G2583_0992 | -         | CDS  |
| O55/O157             | 1019342           | s                 | rec    | G2583_0992 | -         | CDS  |
| O55/O157             | 1019343           | s                 | rec    | G2583_0992 | -         | CDS  |
| O55/O157             | 1019347           | ns                | rec    | G2583_0992 | -         | CDS  |
| O55/O157             | 1019351           | ns                | rec    | G2583_0992 | -         | CDS  |
| O55/O157             | 1019422           | ns                | rec    | G2583_0992 | -         | CDS  |
| O55/O157             | 1019424           | ns                | rec    | G2583_0992 | -         | CDS  |
| O55/O157             | 1019430           | s                 | rec    | G2583_0992 | -         | CDS  |
| O55/O157             | 1019436           | s                 | rec    | G2583_0992 | -         | CDS  |
| O55/O157             | 1019480           | ns                | rec    | G2583_0992 | -         | CDS  |
| O55/O157             | 1019493           | s                 | rec    | G2583_0992 | -         | CDS  |
| O55/O157             | 1019498           | ns                | rec    | G2583_0992 | -         | CDS  |
| O55/O157             | 1019529           | s                 | rec    | G2583_0992 | -         | CDS  |
| O55/O157             | 1019544           | s                 | rec    | G2583_0992 | -         | CDS  |
| O55/O157             | 1019562           | s                 | rec    | G2583_0992 | -         | CDS  |
| O55/O157             | 1019581           | ns                | rec    | G2583_0992 | -         | CDS  |
| O55/O157             | 1019607           | s                 | rec    | G2583_0992 | -         | CDS  |
| O55/O157             | 1019620           | ns                | rec    | G2583_0992 | -         | CDS  |
| O55/O157             | 1019622           | ns                | rec    | G2583_0992 | -         | CDS  |
| O55/O157             | 1019775           | s                 | rec    | G2583_0992 | -         | CDS  |
| O55/O157             | 1019778           | s                 | rec    | G2583_0992 | -         | CDS  |
| O55/O157             | 1019820           | s                 | rec    | G2583_0992 | -         | CDS  |
| O55/O157             | 1019823           | s                 | rec    | G2583_0992 | -         | CDS  |
| O55/O157             | 1019831           | indel-5           | rec    | intergenic |           |      |
| O55/O157             | 1019844           | i                 | rec    | intergenic |           |      |
| O55/O157             | 1019884           | i                 | rec    | intergenic |           |      |
| O55/O157             | 1019888           | ns                | rec    | G2583_0993 | -         | CDS  |
| O55/O157             | 1019889           | ns                | rec    | G2583_0993 | -         | CDS  |
| O55/O157             | 1019896           | indel-3           | rec    | G2583_0993 | -         | CDS  |
| O55/O157             | 1019900           | ns                | rec    | G2583_0993 | -         | CDS  |
| O55/O157             | 1019902           | ns                | rec    | G2583_0993 | -         | CDS  |
| O55/O157             | 1019905           | s                 | rec    | G2583_0993 | -         | CDS  |
| O55/O157             | 1019911           | s                 | rec    | G2583_0993 | -         | CDS  |
| O55/O157             | 1019914           | s                 | rec    | G2583_0993 | -         | CDS  |
| O55/O157             | 1019923           | s                 | rec    | G2583_0993 | -         | CDS  |
| O55/O157             | 1019926           | s                 | rec    | G2583_0993 | -         | CDS  |
| O55/O157             | 1019927           | ns                | rec    | G2583_0993 | -         | CDS  |
| O55/O157             | 1019929           | ns                | rec    | G2583_0993 | -         | CDS  |
| O55/O157             | 1019938           | s                 | rec    | G2583_0993 | -         | CDS  |

| lineage <sup>a</sup> | site <sup>b</sup> | mutation          |        | gene       | Gene name | Type |
|----------------------|-------------------|-------------------|--------|------------|-----------|------|
|                      |                   | type <sup>c</sup> | recomb |            |           |      |
| O55/O157             | 1019939           | ns                | rec    | G2583_0993 | -         | CDS  |
| O55/O157             | 1019942           | ns                | rec    | G2583_0993 | -         | CDS  |
| O55/O157             | 1019974           | s                 | rec    | G2583_0993 | -         | CDS  |
| O55/O157             | 1019976           | ns                | rec    | G2583_0993 | -         | CDS  |
| O55/O157             | 1019982           | ns                | rec    | G2583_0993 | -         | CDS  |
| O55/O157             | 1020025           | s                 | rec    | G2583_0993 | -         | CDS  |
| O55/O157             | 1020028           | s                 | rec    | G2583_0993 | -         | CDS  |
| O55/O157             | 1020031           | s                 | rec    | G2583_0993 | -         | CDS  |
| O55/O157             | 1020049           | s                 | rec    | G2583_0993 | -         | CDS  |
| O55/O157             | 1020055           | s                 | rec    | G2583_0993 | -         | CDS  |
| O55/O157             | 1020072           | ns                | rec    | G2583_0993 | -         | CDS  |
| O55/O157             | 1020085           | s                 | rec    | G2583_0993 | -         | CDS  |
| O55/O157             | 1020097           | s                 | rec    | G2583_0993 | -         | CDS  |
| O55/O157             | 1020116           | ns                | rec    | G2583_0993 | -         | CDS  |
| O55/O157             | 1020139           | s                 | rec    | G2583_0993 | -         | CDS  |
| O55/O157             | 1020196           | s                 | rec    | G2583_0993 | -         | CDS  |
| O55/O157             | 1020202           | s                 | rec    | G2583_0993 | -         | CDS  |
| O55/O157             | 1020213           | ns                | rec    | G2583_0993 | -         | CDS  |
| O55/O157             | 1020226           | s                 | rec    | G2583_0993 | -         | CDS  |
| O55/O157             | 1020228           | ns                | rec    | G2583_0993 | -         | CDS  |
| O55/O157             | 1020229           | ns                | rec    | G2583_0993 | -         | CDS  |
| O55/O157             | 1020241           | s                 | rec    | G2583_0993 | -         | CDS  |
| O55/O157             | 1020268           | s                 | rec    | G2583_0993 | -         | CDS  |
| O55/O157             | 1020271           | s                 | rec    | G2583_0993 | -         | CDS  |
| O55/O157             | 1020280           | s                 | rec    | G2583_0993 | -         | CDS  |
| O55/O157             | 1020308           | ns                | rec    | G2583_0993 | -         | CDS  |
| O55/O157             | 1020313           | s                 | rec    | G2583_0993 | -         | CDS  |
| O55/O157             | 1020318           | ns                | rec    | G2583_0993 | -         | CDS  |
| O55/O157             | 1020325           | s                 | rec    | G2583_0993 | -         | CDS  |
| O55/O157             | 1020337           | s                 | rec    | G2583_0993 | -         | CDS  |
| O55/O157             | 1020348           | ns                | rec    | G2583_0993 | -         | CDS  |
| O55/O157             | 1020352           | ns                | rec    | G2583_0993 | -         | CDS  |
| O55/O157             | 1020394           | s                 | rec    | G2583_0993 | -         | CDS  |
| O55/O157             | 1020401           | ns                | rec    | G2583_0993 | -         | CDS  |
| O55/O157             | 1020412           | ns                | rec    | G2583_0993 | -         | CDS  |
| O55/O157             | 1020427           | s                 | rec    | G2583_0993 | -         | CDS  |
| O55/O157             | 1020430           | s                 | rec    | G2583_0993 | -         | CDS  |
| O55/O157             | 1020435           | ns                | rec    | G2583_0993 | -         | CDS  |
| O55/O157             | 1020462           | ns                | rec    | G2583_0993 | -         | CDS  |
| O55/O157             | 1020473           | ns                | rec    | G2583_0993 | -         | CDS  |
| O55/O157             | 1020478           | ns                | rec    | G2583_0993 | -         | CDS  |
| O55/O157             | 1020481           | s                 | rec    | G2583_0993 | -         | CDS  |
| O55/O157             | 1020484           | s                 | rec    | G2583_0993 | -         | CDS  |
| O55/O157             | 1020492           | ns                | rec    | G2583_0993 | -         | CDS  |
| O55/O157             | 1020542           | ns                | rec    | G2583_0993 | -         | CDS  |



| lineage <sup>a</sup> | site <sup>b</sup> | mutation          |        | gene       | Gene name | Type |
|----------------------|-------------------|-------------------|--------|------------|-----------|------|
|                      |                   | type <sup>c</sup> | recomb |            |           |      |
| O55/O157             | 1020562           | s                 | rec    | G2583_0993 | -         | CDS  |
| O55/O157             | 1020598           | s                 | rec    | G2583_0993 | -         | CDS  |
| O55/O157             | 1020613           | ns                | rec    | G2583_0993 | -         | CDS  |
| O55/O157             | 1020623           | s                 | rec    | G2583_0993 | -         | CDS  |
| O55/O157             | 1020628           | s                 | rec    | G2583_0993 | -         | CDS  |
| O55/O157             | 1020643           | s                 | rec    | G2583_0993 | -         | CDS  |
| O55/O157             | 1020652           | s                 | rec    | G2583_0993 | -         | CDS  |
| O55/O157             | 1020666           | ns                | rec    | G2583_0993 | -         | CDS  |
| O55/O157             | 1020670           | s                 | rec    | G2583_0993 | -         | CDS  |
| O55/O157             | 1020697           | s                 | rec    | G2583_0993 | -         | CDS  |
| O55/O157             | 1020703           | s                 | rec    | G2583_0993 | -         | CDS  |
| O55/O157             | 1020712           | s                 | rec    | G2583_0993 | -         | CDS  |
| O55/O157             | 1020715           | s                 | rec    | G2583_0993 | -         | CDS  |
| O55/O157             | 1020724           | s                 | rec    | G2583_0993 | -         | CDS  |
| O55/O157             | 1020727           | s                 | rec    | G2583_0993 | -         | CDS  |
| O55/O157             | 1020729           | ns                | rec    | G2583_0993 | -         | CDS  |
| O55/O157             | 1020730           | ns                | rec    | G2583_0993 | -         | CDS  |
| O55/O157             | 1020742           | s                 | rec    | G2583_0993 | -         | CDS  |
| O55/O157             | 1020756           | ns                | rec    | G2583_0993 | -         | CDS  |
| O55/O157             | 1020760           | s                 | rec    | G2583_0993 | -         | CDS  |
| O55/O157             | 1020764           | ns                | rec    | G2583_0993 | -         | CDS  |
| O55/O157             | 1020766           | ns                | rec    | G2583_0993 | -         | CDS  |
| O55/O157             | 1020778           | s                 | rec    | G2583_0993 | -         | CDS  |
| Sakai                | 923765            | s                 | rec    | G2583_0993 | -         | CDS  |
| Sakai                | 923798            | s                 | rec    | G2583_0993 | -         | CDS  |
| Sakai                | 923803            | ns                | rec    | G2583_0993 | -         | CDS  |
| Sakai                | 923805            | ns                | rec    | G2583_0993 | -         | CDS  |
| Sakai                | 923819            | s                 | rec    | G2583_0993 | -         | CDS  |
| EDL933               | 925482            | s                 |        | G2583_0993 | -         | CDS  |
| O55/O157             | 1020868           | s                 | rec    | G2583_0993 | -         | CDS  |
| O55/O157             | 1020871           | s                 | rec    | G2583_0993 | -         | CDS  |
| Sakai                | 923841            | ns                | rec    | G2583_0993 | -         | CDS  |
| Sakai                | 923846            | s                 | rec    | G2583_0993 | -         | CDS  |
| Sakai                | 923855            | s                 | rec    | G2583_0993 | -         | CDS  |
| Sakai                | 923858            | s                 | rec    | G2583_0993 | -         | CDS  |
| Sakai                | 923873            | s                 | rec    | G2583_0993 | -         | CDS  |
| Sakai                | 923903            | s                 | rec    | G2583_0993 | -         | CDS  |
| O55/O157             | 1020949           | s                 | rec    | G2583_0993 | -         | CDS  |
| Sakai                | 923919            | ns                | rec    | G2583_0993 | -         | CDS  |
| O55/O157             | 1020979           | s                 | rec    | G2583_0993 | -         | CDS  |
| O55/O157             | 1020982           | s                 | rec    | G2583_0993 | -         | CDS  |
| O55/O157             | 1020985           | s                 | rec    | G2583_0993 | -         | CDS  |
| O55/O157             | 1020998           | ns                | rec    | G2583_0993 | -         | CDS  |
| O55/O157             | 1020999           | ns                | rec    | G2583_0993 | -         | CDS  |
| O55/O157             | 1021003           | ns                | rec    | G2583_0993 | -         | CDS  |

| lineage <sup>a</sup> | site <sup>b</sup> | mutation          |        | gene            | Gene name | Type |
|----------------------|-------------------|-------------------|--------|-----------------|-----------|------|
|                      |                   | type <sup>c</sup> | recomb |                 |           |      |
| O55/O157             | 1021022           | ns                | rec    | G2583_0993      | -         | CDS  |
| O55/O157             | 1021106           | ns                | rec    | G2583_0993      | -         | CDS  |
| O55/O157             | 1021129           | s                 | rec    | G2583_0993      | -         | CDS  |
| O55/O157             | 1021144           | s                 | rec    | G2583_0993      | -         | CDS  |
| O55/O157             | 1021162           | s                 | rec    | G2583_0993      | -         | CDS  |
| O55/O157             | 1021195           | ns                | rec    | G2583_0993-0994 | -         | CDS  |
| O55/O157             | 1021211           | s                 | rec    | G2583_0994      | -         | CDS  |
| O55/O157             | 1021212           | ns                | rec    | G2583_0994      | -         | CDS  |
| O55/O157             | 1021214           | ns                | rec    | G2583_0994      | -         | CDS  |
| O55/O157             | 1021215           | s                 | rec    | G2583_0994      | -         | CDS  |
| O55/O157             | 1021217           | s                 | rec    | G2583_0994      | -         | CDS  |
| O55/O157             | 1021219           | ns                | rec    | G2583_0994      | -         | CDS  |
| O55/O157             | 1021223           | s                 | rec    | G2583_0994      | -         | CDS  |
| O55/O157             | 1021233           | ns                | rec    | G2583_0994      | -         | CDS  |
| O55/O157             | 1021244           | s                 | rec    | G2583_0994      | -         | CDS  |
| O55/O157             | 1021246           | ns                | rec    | G2583_0994      | -         | CDS  |
| O55/O157             | 1021263           | ns                | rec    | G2583_0994      | -         | CDS  |
| O55/O157             | 1021269           | ns                | rec    | G2583_0994      | -         | CDS  |
| O55/O157             | 1021274           | s                 | rec    | G2583_0994      | -         | CDS  |
| O55/O157             | 1021275           | ns                | rec    | G2583_0994      | -         | CDS  |
| O55/O157             | 1021276           | ns                | rec    | G2583_0994      | -         | CDS  |
| O55/O157             | 1021279           | ns                | rec    | G2583_0994      | -         | CDS  |
| O55/O157             | 1021293           | s                 | rec    | G2583_0994      | -         | CDS  |
| O55/O157             | 1021298           | s                 | rec    | G2583_0994      | -         | CDS  |
| O55/O157             | 1021304           | s                 | rec    | G2583_0994      | -         | CDS  |
| O55/O157             | 1021316           | s                 | rec    | G2583_0994      | -         | CDS  |
| O55/O157             | 1021337           | s                 | rec    | G2583_0994      | -         | CDS  |
| O55/O157             | 1021354           | ns                | rec    | G2583_0994      | -         | CDS  |
| O55/O157             | 1021367           | s                 | rec    | G2583_0994      | -         | CDS  |
| O55/O157             | 1021388           | s                 | rec    | G2583_0994      | -         | CDS  |
| O157                 | 927433            | ins               |        | intergenic      |           |      |
| CB9615               | 1025582           | i                 |        | intergenic      |           |      |
| O157                 | 928637            | ns                |        | G2583_1000      | nleD      | CDS  |
| O157                 | 929080            | ns                |        | G2583_1000      | nleD      | CDS  |
| CB9615               | 1026181           | s                 |        | G2583_1000      | nleD      | CDS  |
| O157                 | 929177            | ns                |        | G2583_1000      | nleD      | CDS  |
| CB9615               | 1026718           | i                 |        | intergenic      |           |      |
| EDL933               | 931402            | ins               |        | intergenic      |           |      |
| O157                 | 932040            | ns                |        | G2583_1003      | bioB      | CDS  |
| O157                 | 933875            | s                 |        | G2583_1004      | bioF      | CDS  |
| O157                 | 935246            | ns                |        | G2583_1006      | bioD      | CDS  |
| EDL933               | 937001            | ins               |        | intergenic      |           |      |
| Sakai                | 935573            | i                 |        | intergenic      |           |      |
| O157                 | 939207            | i                 |        | intergenic      |           |      |
| CB9615               | 1037023           | s                 |        | G2583_1009      | moaA      | CDS  |

| lineage <sup>a</sup> | site <sup>b</sup> | mutation          |        | gene       | Gene name | Type |
|----------------------|-------------------|-------------------|--------|------------|-----------|------|
|                      |                   | type <sup>c</sup> | recomb |            |           |      |
| CB9615               | 1038537           | ns                |        | G2583_1012 | moaD      | CDS  |
| O157                 | 941892            | ns                |        | G2583_1013 | moaE      | CDS  |
| O157                 | 941948            | ns                |        | G2583_1013 | moaE      | CDS  |
| O157                 | 949422            | s                 |        | G2583_1021 | ybhS      | CDS  |
| CB9615               | 1048669           | ns                |        | G2583_1023 | ybhG      | CDS  |
| CB9615               | 1051769           | i                 |        | intergenic |           |      |
| O157                 | 954756            | i                 |        | intergenic |           |      |
| CB9615               | 1053247           | ns                |        | G2583_1026 | sopA      | CDS  |
| CB9615               | 1054190           | ns                |        | G2583_1026 | sopA      | CDS  |
| CB9615               | 1054323           | i                 |        | intergenic |           |      |
| CB9615               | 1054946           | ns                |        | G2583_1027 | dinG      | CDS  |
| O157                 | 958598            | s                 |        | G2583_1027 | dinG      | CDS  |
| EDL933               | 962356            | ins               |        | intergenic |           |      |
| CB9615               | 1058153           | s                 |        | G2583_1029 | ybiC      | CDS  |
| O157                 | 961276            | s                 |        | G2583_1029 | ybiC      | CDS  |
| EDL933               | 963209            | s                 |        | G2583_1029 | ybiC      | CDS  |
| EDL933               | 963601            | ins               |        | intergenic |           |      |
| O157                 | 961981            | i                 |        | intergenic |           |      |
| O157                 | 962912            | ins-2             |        | intergenic |           |      |
| O157                 | 962926            | i                 |        | intergenic |           |      |
| O157                 | 963066            | ins-9             |        | G2583_1032 | ybiX      | CDS  |
| O157                 | 963843            | s                 |        | G2583_1033 | fiu       | CDS  |
| O157                 | 964831            | s                 |        | G2583_1033 | fiu       | CDS  |
| O157                 | 965032            | s                 |        | G2583_1033 | fiu       | CDS  |
| O157                 | 967383            | ns                |        | G2583_1035 | ybiN      | CDS  |
| O157                 | 967469            | s                 |        | G2583_1035 | ybiN      | CDS  |
| O157                 | 969118            | ns                |        | G2583_1036 | ybiO      | CDS  |
| EDL933               | 973215            | ins               |        | intergenic |           |      |
| EDL933               | 974119            | i                 |        | intergenic |           |      |
| CB9615               | 1071861           | s                 |        | G2583_1042 | ompX      | CDS  |
| EDL933               | 978220            | s                 |        | G2583_1043 | ybiP      | CDS  |
| CB9615               | 1074877           | ns                |        | G2583_1045 | mntR      | CDS  |
| O157                 | 978253            | ns                |        | G2583_1046 | ybiR      | CDS  |
| EDL933               | 981745            | ins               |        | intergenic |           |      |
| O157                 | 980189            | i                 |        | intergenic |           |      |
| CB9615               | 1078504           | ns                |        | G2583_1048 | ybiT      | CDS  |
| CB9615               | 1078786           | s                 |        | G2583_1048 | ybiT      | CDS  |
| O157                 | 982480            | ns                |        | G2583_1049 | ybiU      | CDS  |
| EDL933               | 985052            | ins               |        | intergenic |           |      |
| O157                 | 985536            | ns                |        | G2583_1051 | ybiW      | CDS  |
| O157                 | 986309            | del               |        | G2583_1051 | ybiW      | CDS  |
| CB9615               | 1084204           | ns                |        | G2583_1052 | ybiY      | CDS  |
| O157                 | 987457            | ns                |        | G2583_1052 | ybiY      | CDS  |
| CB9615               | 1084813           | i                 |        | intergenic |           |      |
| CB9615               | 1086319           | s                 |        | G2583_1054 | moeB      | CDS  |

| lineage <sup>a</sup> | site <sup>b</sup> | mutation          |        | gene       | Gene name | Type       |
|----------------------|-------------------|-------------------|--------|------------|-----------|------------|
|                      |                   | type <sup>c</sup> | recomb |            |           |            |
| CB9615               | 1087266           | s                 |        | G2583_1055 | moeA      | CDS        |
| O157                 | 991247            | ns                |        | G2583_1056 | iaaA      | CDS        |
| CB9615               | 1088417           | ns                |        | G2583_1056 | iaaA      | CDS        |
| CB9615               | 1088690           | ns                |        | G2583_1056 | iaaA      | CDS        |
| CB9615               | 1089463           | ns                |        | G2583_1057 | gsiA      | CDS        |
| O157                 | 992822            | s                 |        | G2583_1057 | gsiA      | CDS        |
| O157                 | 995579            | ns                |        | G2583_1059 | gsiC      | CDS        |
| CB9615               | 1093284           | ns                |        | G2583_1060 | gsiD      | CDS        |
| O157                 | 997719            | ns                |        | G2583_1061 | yliE      | CDS        |
| O157                 | 998270            | ns                |        | G2583_1061 | yliE      | CDS        |
| O157                 | 999350            | ns                |        | G2583_1061 | yliE      | CDS        |
| O157                 | 1000811           | s                 |        | G2583_1062 | yliF      | CDS        |
| CB9615               | 1099295           | ns                |        | G2583_1065 | yliG      | CDS        |
| CB9615               | 1108324           | ns                |        | G2583_1074 | ybjI      | CDS        |
| CB9615               | 1108788           | ns                |        | G2583_1075 | ybjJ      | CDS        |
| CB9615               | 1110546           | s                 |        | G2583_1078 | ybjL      | CDS        |
| O157                 | 1015134           | i                 |        | intergenic |           |            |
| EDL933               | 1016923           | i                 |        | intergenic |           |            |
| EDL933               | 1017032           | ins               |        | intergenic |           |            |
| CB9615               | 1113392           | ns                |        | G2583_1081 | ybjC      | CDS        |
| CB9615               | 1113428           | ns                |        | G2583_1081 | ybjC      | CDS        |
| CB9615               | 1114264           | i                 |        | intergenic |           |            |
| O157                 | 1018191           | i                 |        | intergenic |           |            |
| CB9615               | 1115829           | i                 |        | intergenic |           |            |
| O157                 | 1020868           | s                 |        | G2583_1086 | potG      | CDS        |
| O157                 | 1021692           | ns                |        | G2583_1087 | potH      | CDS        |
| O157                 | 1022959           | ns                |        | G2583_1088 | potI      | CDS        |
| O157                 | 1023105           | s                 |        | G2583_1088 | potI      | CDS        |
| CB9615               | 1120325           | ns                |        | G2583_1089 | ybjO      | CDS        |
| O157                 | 1025210           | i                 |        | intergenic |           |            |
| CB9615               | 1123758           | ns                |        | G2583_1092 | -         | CDS        |
| O157                 | 1027219           | ns                |        | G2583_1093 | -         | CDS        |
| O157                 | 1027830           | ns                |        | G2583_1093 | -         | CDS        |
| O157                 | 1029023           | s                 |        | G2583_1094 | artJ      | CDS        |
| O157                 | 1030347           | s                 |        | G2583_1096 | artQ      | CDS        |
| O157                 | 1032910           | ns                |        | G2583_1099 | ybjP      | CDS        |
| EDL933               | 1035050           | ins               |        | intergenic |           |            |
| CB9615               | 1130628           | i                 |        | intergenic |           |            |
| O157                 | 1033693           | nc                |        | G2583_1101 | -         | pseudogene |
| CB9615               | 1131140           | nc                |        | G2583_1101 | -         | pseudogene |
| CB9615               | 1131296           | nc                |        | G2583_1101 | -         | pseudogene |
| CB9615               | 1131422           | nc                |        | G2583_1101 | -         | pseudogene |
| CB9615               | 1131759           | nc                |        | G2583_1101 | -         | pseudogene |
| O157                 | 1034910           | ins-7             |        | G2583_1101 | -         | pseudogene |
| O157                 | 1037575           | s                 |        | G2583_1105 | ybjS      | CDS        |

| lineage <sup>a</sup> | site <sup>b</sup> | mutation          |        | gene       | Gene name | Type |
|----------------------|-------------------|-------------------|--------|------------|-----------|------|
|                      |                   | type <sup>c</sup> | recomb |            |           |      |
| O157                 | 1039857           | ns                |        | G2583_1107 | ltaE      | CDS  |
| CB9615               | 1139385           | s                 |        | G2583_1109 | hcr       | CDS  |
| O157                 | 1042561           | s                 |        | G2583_1109 | hcr       | CDS  |
| CB9615               | 1139855           | ns                |        | G2583_1109 | hcr       | CDS  |
| CB9615               | 1140088           | ns                |        | G2583_1109 | hcr       | CDS  |
| CB9615               | 1140396           | ns                |        | G2583_1110 | hcp       | CDS  |
| O157                 | 1043658           | s                 |        | G2583_1110 | hcp       | CDS  |
| O157                 | 1045975           | i                 |        | intergenic |           |      |
| CB9615               | 1143104           | i                 |        | intergenic |           |      |
| EDL933               | 1047831           | i                 |        | intergenic |           |      |
| EDL933               | 1047833           | i                 |        | intergenic |           |      |
| EDL933               | 1047834           | i                 |        | intergenic |           |      |
| CB9615               | 1143375           | i                 |        | intergenic |           |      |
| O157                 | 1047805           | s                 |        | G2583_1113 | ybjD      | CDS  |
| EDL933               | 1053619           | ns                |        | G2583_1116 | macB      | CDS  |
| EDL933               | 1053625           | ns                |        | G2583_1116 | macB      | CDS  |
| CB9615               | 1153896           | del               |        | intergenic |           |      |
| O157                 | 1057224           | i                 |        | intergenic |           |      |
| O157                 | 1058900           | ns                |        | G2583_1123 | cydC      | CDS  |
| O157                 | 1059792           | ns                |        | G2583_1123 | cydC      | CDS  |
| O157                 | 1060753           | s                 |        | G2583_1124 | cydD      | CDS  |
| CB9615               | 1158058           | ns                |        | G2583_1124 | cydD      | CDS  |
| CB9615               | 1158847           | ns                |        | G2583_1124 | cydD      | CDS  |
| CB9615               | 1160395           | i                 |        | intergenic |           |      |
| O157                 | 1064616           | ns                |        | G2583_1127 | ftsK      | CDS  |
| O157                 | 1066322           | s                 |        | G2583_1127 | ftsK      | CDS  |
| O157                 | 1068309           | ns                |        | G2583_1127 | ftsK      | CDS  |
| CB9615               | 1165450           | i                 |        | intergenic |           |      |
| CB9615               | 1166262           | ns                |        | G2583_1129 | rarA      | CDS  |
| EDL933               | 1160369           | ns                |        | G2583_1130 | serS      | CDS  |
| CB9615               | 1168985           | i                 |        | intergenic |           |      |
| O157                 | 1074617           | ns                |        | G2583_1132 | dmsB      | CDS  |
| O157                 | 1075240           | s                 |        | G2583_1133 | dmsC      | CDS  |
| CB9615               | 1178467           | s                 |        | G2583_1138 | pflB      | CDS  |
| CB9615               | 1180804           | s                 |        | G2583_1139 | focA      | CDS  |
| CB9615               | 1183760           | ns                |        | G2583_1141 | ycaP      | CDS  |
| O157                 | 1087342           | ns                |        | G2583_1142 | serC      | CDS  |
| CB9615               | 1185822           | ns                |        | G2583_1143 | aroA      | CDS  |
| CB9615               | 1186891           | i                 |        | intergenic |           |      |
| CB9615               | 1187559           | ns                |        | G2583_1144 | ycaL      | CDS  |
| O157                 | 1095098           | s                 |        | G2583_1148 | ycaI      | CDS  |
| O157                 | 1095795           | ns                |        | G2583_1148 | ycaI      | CDS  |
| CB9615               | 1193541           | s                 |        | G2583_1149 | msbA      | CDS  |
| O157                 | 1099686           | ns                |        | G2583_1151 | ycaQ      | CDS  |
| O157                 | 1101693           | s                 |        | G2583_1154 | ycbJ      | CDS  |

| lineage <sup>a</sup> | site <sup>b</sup> | mutation          |        | gene       | Gene name | Type       |
|----------------------|-------------------|-------------------|--------|------------|-----------|------------|
|                      |                   | type <sup>c</sup> | recomb |            |           |            |
| CB9615               | 1198848           | ns                |        | G2583_1154 | ycbJ      | CDS        |
| CB9615               | 1201044           | s                 |        | G2583_1157 | mukF      | CDS        |
| CB9615               | 1204963           | ns                |        | G2583_1159 | mukB      | CDS        |
| CB9615               | 1206013           | ns                |        | G2583_1159 | mukB      | CDS        |
| O157                 | 1109237           | s                 |        | G2583_1159 | mukB      | CDS        |
| O157                 | 1111344           | ns                |        | G2583_1160 | ycbB      | CDS        |
| EDL933               | 1212328           | ins               |        | intergenic |           |            |
| O157                 | 1116845           | ins               |        | intergenic |           |            |
| CB9615               | 1214573           | s                 |        | G2583_1165 | asnS      | CDS        |
| CB9615               | 1215788           | ns                |        | G2583_1166 | pncB      | CDS        |
| O157                 | 1119462           | s                 |        | G2583_1166 | pncB      | CDS        |
| CB9615               | 1218645           | ns                |        | G2583_1167 | pepN      | CDS        |
| O157                 | 1122663           | s                 |        | G2583_1167 | pepN      | CDS        |
| O157                 | 1124089           | ns                |        | G2583_1169 | ssuC      | CDS        |
| O157                 | 1124352           | ns                |        | G2583_1170 | ssuD      | CDS        |
| O157                 | 1127116           | i                 |        | intergenic |           |            |
| CB9615               | 1224147           | del-4             |        | intergenic |           |            |
| CB9615               | 1225775           | nc                |        | G2583_1175 | ycbS      | pseudogene |
| O157                 | 1130668           | nc                |        | G2583_1175 | ycbS      | pseudogene |
| O157                 | 1132256           | ns                |        | G2583_1176 | ycbT      | CDS        |
| CB9615               | 1229308           | ns                |        | G2583_1176 | ycbT      | CDS        |
| CB9615               | 1229795           | s                 |        | G2583_1177 | ycbU      | CDS        |
| O157                 | 1133470           | s                 |        | G2583_1179 | ycbF      | CDS        |
| O157                 | 1133596           | ns                |        | G2583_1179 | ycbF      | CDS        |
| O157                 | 1133863           | del               |        | G2583_1179 | ycbF      | CDS        |
| CB9615               | 1233217           | ns                |        | G2583_1182 | ycbX      | CDS        |
| CB9615               | 1234198           | i                 |        | intergenic |           |            |
| O157                 | 1138109           | s                 |        | G2583_1183 | rlmL      | CDS        |
| O157                 | 1140211           | s                 |        | G2583_1184 | uup       | CDS        |
| CB9615               | 1238514           | s                 |        | G2583_1185 | pqiA      | CDS        |
| O157                 | 1143210           | ns                |        | G2583_1186 | pqiB      | CDS        |
| CB9615               | 1246780           | i                 |        | intergenic |           |            |
| O157                 | 1150523           | i                 |        | intergenic |           |            |
| O157                 | 1150795           | ns                |        | G2583_1194 | sxy       | CDS        |
| EDL933               | 1240814           | s                 |        | G2583_1195 | yccS      | CDS        |
| CB9615               | 1251306           | ns                |        | G2583_1197 | helD      | CDS        |
| CB9615               | 1256702           | ns                |        | G2583_1203 | yccX      | CDS        |
| O157                 | 1160684           | ns                |        | G2583_1205 | yccA      | CDS        |
| CB9615               | 1257704           | s                 |        | G2583_1205 | yccA      | CDS        |
| CB9615               | 1257905           | i                 |        | intergenic |           |            |
| O157                 | 1161047           | i                 |        | intergenic |           |            |
| EDL933               | 1250462           | ins               |        | intergenic |           |            |
| EDL933               | 1253627           | ns                |        | ECs1057    | -         | CDS        |
| EDL933               | 1253654           | ns                |        | ECs1057    | -         | CDS        |
| EDL933               | 1255086           | ins               |        | ECs1060    | -         | CDS        |

| lineage <sup>a</sup> | site <sup>b</sup> | mutation          |        | gene    | Gene name | Type |
|----------------------|-------------------|-------------------|--------|---------|-----------|------|
|                      |                   | type <sup>c</sup> | recomb |         |           |      |
| Sakai/EDL933         | 1175577           | ns                | rec    | ECs1082 | -         | CDS  |
| Sakai/EDL933         | 1175578           | ns                | rec    | ECs1082 | -         | CDS  |
| Sakai/EDL933         | 1175581           | ns                | rec    | ECs1082 | -         | CDS  |
| Sakai/EDL933         | 1175596           | ns                | rec    | ECs1082 | -         | CDS  |
| Sakai/EDL933         | 1175605           | ns                | rec    | ECs1082 | -         | CDS  |
| Sakai/EDL933         | 1175611           | ns                | rec    | ECs1082 | -         | CDS  |
| Sakai/EDL933         | 1175614           | ns                | rec    | ECs1082 | -         | CDS  |
| Sakai/EDL933         | 1175668           | ns                | rec    | ECs1082 | -         | CDS  |
| Sakai/EDL933         | 1175671           | ns                | rec    | ECs1082 | -         | CDS  |
| Sakai/EDL933         | 1175680           | ns                | rec    | ECs1082 | -         | CDS  |
| Sakai/EDL933         | 1175683           | ns                | rec    | ECs1082 | -         | CDS  |
| Sakai/EDL933         | 1175689           | ns                | rec    | ECs1082 | -         | CDS  |
| Sakai/EDL933         | 1175692           | ns                | rec    | ECs1082 | -         | CDS  |
| Sakai/EDL933         | 1175732           | ns                | rec    | ECs1082 | -         | CDS  |
| Sakai/EDL933         | 1175740           | ns                | rec    | ECs1082 | -         | CDS  |
| Sakai/EDL933         | 1175756           | ns                | rec    | ECs1082 | -         | CDS  |
| Sakai/EDL933         | 1175757           | ns                | rec    | ECs1082 | -         | CDS  |
| Sakai/EDL933         | 1175764           | ns                | rec    | ECs1082 | -         | CDS  |
| Sakai/EDL933         | 1175767           | ns                | rec    | ECs1082 | -         | CDS  |
| Sakai/EDL933         | 1175776           | ns                | rec    | ECs1082 | -         | CDS  |
| Sakai/EDL933         | 1175800           | ns                | rec    | ECs1082 | -         | CDS  |
| Sakai/EDL933         | 1175804           | ns                | rec    | ECs1082 | -         | CDS  |
| Sakai/EDL933         | 1175817           | ns                | rec    | ECs1082 | -         | CDS  |
| Sakai/EDL933         | 1175824           | ns                | rec    | ECs1082 | -         | CDS  |
| Sakai/EDL933         | 1175825           | ns                | rec    | ECs1082 | -         | CDS  |
| Sakai/EDL933         | 1175830           | ns                | rec    | ECs1082 | -         | CDS  |
| Sakai/EDL933         | 1175833           | ns                | rec    | ECs1082 | -         | CDS  |
| Sakai/EDL933         | 1175836           | ns                | rec    | ECs1082 | -         | CDS  |
| Sakai/EDL933         | 1175841           | ns                | rec    | ECs1082 | -         | CDS  |
| Sakai/EDL933         | 1175842           | ns                | rec    | ECs1082 | -         | CDS  |
| Sakai/EDL933         | 1175851           | ns                | rec    | ECs1082 | -         | CDS  |
| Sakai/EDL933         | 1175857           | ns                | rec    | ECs1082 | -         | CDS  |
| Sakai/EDL933         | 1175860           | ns                | rec    | ECs1082 | -         | CDS  |
| Sakai/EDL933         | 1175862           | ns                | rec    | ECs1082 | -         | CDS  |
| Sakai/EDL933         | 1175863           | ns                | rec    | ECs1082 | -         | CDS  |
| Sakai/EDL933         | 1175966           | ns                | rec    | ECs1082 | -         | CDS  |
| Sakai/EDL933         | 1176041           | ns                | rec    | ECs1082 | -         | CDS  |
| Sakai/EDL933         | 1176051           | ns                | rec    | ECs1082 | -         | CDS  |
| Sakai/EDL933         | 1176175           | ns                | rec    | ECs1082 | -         | CDS  |
| Sakai/EDL933         | 1176316           | ns                | rec    | ECs1082 | -         | CDS  |
| Sakai/EDL933         | 1176375           | ns                | rec    | ECs1083 | -         | CDS  |
| Sakai/EDL933         | 1176509           | ns                | rec    | ECs1083 | -         | CDS  |
| Sakai/EDL933         | 1176517           | ns                | rec    | ECs1083 | -         | CDS  |
| Sakai/EDL933         | 1176523           | ns                | rec    | ECs1083 | -         | CDS  |
| Sakai/EDL933         | 1176532           | ns                | rec    | ECs1083 | -         | CDS  |

| lineage <sup>a</sup> | site <sup>b</sup> | mutation          |        | gene         | Gene name | Type |
|----------------------|-------------------|-------------------|--------|--------------|-----------|------|
|                      |                   | type <sup>c</sup> | recomb |              |           |      |
| Sakai/EDL933         | 1176535           | ns                | rec    | ECs1083      | -         | CDS  |
| Sakai/EDL933         | 1176568           | ns                | rec    | ECs1083      | -         | CDS  |
| Sakai/EDL933         | 1176580           | ns                | rec    | ECs1083      | -         | CDS  |
| Sakai/EDL933         | 1176606           | ns                | rec    | ECs1083      | -         | CDS  |
| Sakai/EDL933         | 1176607           | ns                | rec    | ECs1083      | -         | CDS  |
| Sakai/EDL933         | 1176608           | ns                | rec    | ECs1083      | -         | CDS  |
| Sakai/EDL933         | 1176613           | ns                | rec    | ECs1083      | -         | CDS  |
| Sakai/EDL933         | 1176616           | ns                | rec    | ECs1083      | -         | CDS  |
| Sakai/EDL933         | 1176619           | ns                | rec    | ECs1083      | -         | CDS  |
| Sakai/EDL933         | 1176622           | ns                | rec    | ECs1083      | -         | CDS  |
| Sakai/EDL933         | 1176646           | ns                | rec    | ECs1083      | -         | CDS  |
| Sakai/EDL933         | 1176649           | ns                | rec    | ECs1083      | -         | CDS  |
| Sakai/EDL933         | 1176652           | ns                | rec    | ECs1083      | -         | CDS  |
| Sakai/EDL933         | 1176654           | ns                | rec    | ECs1083      | -         | CDS  |
| Sakai/EDL933         | 1176661           | ns                | rec    | ECs1083      | -         | CDS  |
| Sakai/EDL933         | 1176664           | ns                | rec    | ECs1083      | -         | CDS  |
| Sakai/EDL933         | 1176665           | ns                | rec    | ECs1083      | -         | CDS  |
| Sakai/EDL933         | 1176667           | ns                | rec    | ECs1083      | -         | CDS  |
| Sakai/EDL933         | 1176676           | ns                | rec    | ECs1083      | -         | CDS  |
| Sakai/EDL933         | 1176682           | ns                | rec    | ECs1083      | -         | CDS  |
| CB9615               | 1258254           | i                 |        | intergenic   |           |      |
| CB9615               | 1259582           | ns                |        | G2583_1207   | hyaA      | CDS  |
| CB9615               | 1263377           | ns                |        | G2583_1212   | hyaF      | CDS  |
| O157                 | 1222017           | ns                |        | G2583_1216   | etk       | CDS  |
| CB9615               | 1270175           | ns                |        | G2583_1216   | etk       | CDS  |
| CB9615               | 1274993           | ns                |        | G2583_1220   | gfcC      | CDS  |
| CB9615               | 1275427           | ns                |        | G2583_1221   | gfcB      | CDS  |
| CB9615               | 1276488           | i                 |        | intergenic   |           |      |
| O157                 | 1230443           | del               |        | intergenic   |           |      |
| CB9615               | 1278057           | s                 |        | G2583_1226   | yccM      | CDS  |
| O157                 | 1238521           | s                 |        | G2583_1231   | torA      | CDS  |
| O157                 | 1239117           | s                 |        | G2583_1231   | torA      | CDS  |
| O157                 | 1239925           | ns                |        | G2583_1231   | torA      | CDS  |
| O157                 | 1240061           | ns                |        | G2583_1231   | torA      | CDS  |
| CB9615               | 1289246           | s                 |        | G2583_1234   | cbpA      | CDS  |
| O157                 | 1242359           | i                 |        | intergenic   |           |      |
| O157                 | 1243278           | ins               |        | G2583_1235   | yccE      | CDS  |
| O157                 | 1243622           | ns                |        | G2583_1235   | yccE      | CDS  |
| O157                 | 1245860           | ns                |        | G2583_1238   | wrbA      | CDS  |
| O157                 | 1246019           | ns                |        | G2583_1238   | wrbA      | CDS  |
| Sakai/EDL933         | 1251647           | ns                | rec    | ECs1172      | -         | CDS  |
| Sakai/EDL933         | 1251664           | ns                | rec    | ECs1172-1173 | -         | CDS  |
| Sakai/EDL933         | 1251670           | ns                | rec    | ECs1172-1173 | -         | CDS  |
| Sakai/EDL933         | 1251693           | s                 | rec    | ECs1173      | -         | CDS  |
| Sakai/EDL933         | 1251696           | s                 | rec    | ECs1173      | -         | CDS  |



| lineage <sup>a</sup> | site <sup>b</sup> | mutation          |        | gene    | Gene name | Type |
|----------------------|-------------------|-------------------|--------|---------|-----------|------|
|                      |                   | type <sup>c</sup> | recomb |         |           |      |
| Sakai/EDL933         | 1251714           | s                 | rec    | ECs1173 | -         | CDS  |
| Sakai/EDL933         | 1251738           | s                 | rec    | ECs1173 | -         | CDS  |
| Sakai/EDL933         | 1251746           | s                 | rec    | ECs1173 | -         | CDS  |
| Sakai/EDL933         | 1251809           | ns                | rec    | ECs1173 | -         | CDS  |
| Sakai/EDL933         | 1251810           | s                 | rec    | ECs1173 | -         | CDS  |
| Sakai/EDL933         | 1251843           | ns                | rec    | ECs1174 | -         | CDS  |
| Sakai/EDL933         | 1251844           | ns                | rec    | ECs1174 | -         | CDS  |
| Sakai/EDL933         | 1251858           | ns                | rec    | ECs1174 | -         | CDS  |
| Sakai/EDL933         | 1251946           | ns                | rec    | ECs1174 | -         | CDS  |
| Sakai/EDL933         | 1251955           | ns                | rec    | ECs1174 | -         | CDS  |
| Sakai/EDL933         | 1251986           | s                 | rec    | ECs1174 | -         | CDS  |
| Sakai/EDL933         | 1251989           | s                 | rec    | ECs1174 | -         | CDS  |
| Sakai/EDL933         | 1252067           | s                 | rec    | ECs1174 | -         | CDS  |
| Sakai/EDL933         | 1252142           | s                 | rec    | ECs1174 | -         | CDS  |
| Sakai/EDL933         | 1252181           | s                 | rec    | ECs1174 | -         | CDS  |
| Sakai/EDL933         | 1252218           | ns                | rec    | ECs1174 | -         | CDS  |
| Sakai/EDL933         | 1252247           | s                 | rec    | ECs1174 | -         | CDS  |
| Sakai/EDL933         | 1252289           | s                 | rec    | ECs1174 | -         | CDS  |
| Sakai/EDL933         | 1252292           | s                 | rec    | ECs1174 | -         | CDS  |
| Sakai/EDL933         | 1252331           | s                 | rec    | ECs1174 | -         | CDS  |
| Sakai/EDL933         | 1252334           | s                 | rec    | ECs1174 | -         | CDS  |
| Sakai/EDL933         | 1252385           | s                 | rec    | ECs1174 | -         | CDS  |
| Sakai/EDL933         | 1252391           | s                 | rec    | ECs1174 | -         | CDS  |
| Sakai/EDL933         | 1252400           | s                 | rec    | ECs1174 | -         | CDS  |
| Sakai/EDL933         | 1252411           | ns                | rec    | ECs1174 | -         | CDS  |
| Sakai/EDL933         | 1252421           | s                 | rec    | ECs1174 | -         | CDS  |
| Sakai/EDL933         | 1252451           | s                 | rec    | ECs1174 | -         | CDS  |
| Sakai/EDL933         | 1252460           | s                 | rec    | ECs1174 | -         | CDS  |
| Sakai/EDL933         | 1252487           | s                 | rec    | ECs1174 | -         | CDS  |
| Sakai/EDL933         | 1252522           | s                 | rec    | ECs1175 | -         | CDS  |
| Sakai/EDL933         | 1252534           | s                 | rec    | ECs1175 | -         | CDS  |
| Sakai/EDL933         | 1252539           | ns                | rec    | ECs1175 | -         | CDS  |
| Sakai/EDL933         | 1252546           | s                 | rec    | ECs1175 | -         | CDS  |
| Sakai/EDL933         | 1252565           | ns                | rec    | ECs1175 | -         | CDS  |
| Sakai/EDL933         | 1252570           | s                 | rec    | ECs1175 | -         | CDS  |
| Sakai/EDL933         | 1252603           | s                 | rec    | ECs1175 | -         | CDS  |
| Sakai/EDL933         | 1252690           | s                 | rec    | ECs1175 | -         | CDS  |
| Sakai/EDL933         | 1252738           | s                 | rec    | ECs1175 | -         | CDS  |
| Sakai/EDL933         | 1252756           | s                 | rec    | ECs1175 | -         | CDS  |
| Sakai/EDL933         | 1252816           | s                 | rec    | ECs1175 | -         | CDS  |
| Sakai/EDL933         | 1252846           | s                 | rec    | ECs1175 | -         | CDS  |
| Sakai/EDL933         | 1252879           | s                 | rec    | ECs1175 | -         | CDS  |
| Sakai/EDL933         | 1252882           | s                 | rec    | ECs1175 | -         | CDS  |
| Sakai/EDL933         | 1252969           | s                 | rec    | ECs1175 | -         | CDS  |
| Sakai/EDL933         | 1252990           | s                 | rec    | ECs1175 | -         | CDS  |

| lineage <sup>a</sup> | site <sup>b</sup> | mutation          |        | gene         | Gene name | Type |
|----------------------|-------------------|-------------------|--------|--------------|-----------|------|
|                      |                   | type <sup>c</sup> | recomb |              |           |      |
| Sakai/EDL933         | 1253041           | s                 | rec    | ECs1175      | -         | CDS  |
| Sakai/EDL933         | 1253160           | s                 | rec    | ECs1175      | -         | CDS  |
| Sakai/EDL933         | 1253275           | s                 | rec    | ECs1175      | -         | CDS  |
| Sakai/EDL933         | 1253305           | i                 | rec    | intergenic   |           |      |
| Sakai/EDL933         | 1253382           | ns                | rec    | ECs1176      | -         | CDS  |
| Sakai/EDL933         | 1253463           | ns                | rec    | ECs1176      | -         | CDS  |
| Sakai/EDL933         | 1253466           | ns                | rec    | ECs1176      | -         | CDS  |
| Sakai/EDL933         | 1253490           | ns                | rec    | ECs1176      | -         | CDS  |
| Sakai/EDL933         | 1253497           | s                 | rec    | ECs1176      | -         | CDS  |
| Sakai/EDL933         | 1253558           | ns                | rec    | ECs1176      | -         | CDS  |
| Sakai/EDL933         | 1253619           | indel             | rec    | ECs1176      | -         | CDS  |
| Sakai/EDL933         | 1253621           | ns                | rec    | ECs1176      | -         | CDS  |
| Sakai/EDL933         | 1253650           | ns                | rec    | ECs1176      | -         | CDS  |
| Sakai/EDL933         | 1253673           | s                 | rec    | ECs1176      | -         | CDS  |
| Sakai/EDL933         | 1253711           | ns                | rec    | ECs1176-1177 | -         | CDS  |
| Sakai/EDL933         | 1253741           | s                 | rec    | ECs1177      | -         | CDS  |
| Sakai/EDL933         | 1253744           | s                 | rec    | ECs1177      | -         | CDS  |
| Sakai/EDL933         | 1253823           | ns                | rec    | ECs1177-1178 | -         | CDS  |
| Sakai/EDL933         | 1253845           | ns                | rec    | ECs1177-1178 | -         | CDS  |
| Sakai/EDL933         | 1254019           | i                 | rec    | intergenic   |           |      |
| Sakai/EDL933         | 1254025           | i                 | rec    | intergenic   |           |      |
| Sakai/EDL933         | 1254036           | s                 | rec    | ECs1179      | -         | CDS  |
| Sakai/EDL933         | 1254116           | ns                | rec    | ECs1179      | -         | CDS  |
| Sakai/EDL933         | 1254245           | ns                | rec    | ECs1179      | -         | CDS  |
| Sakai/EDL933         | 1264454           | ns                | rec    | ECs1200      | -         | CDS  |
| Sakai/EDL933         | 1264456           | ns                | rec    | ECs1200      | -         | CDS  |
| Sakai/EDL933         | 1264472           | ns                | rec    | ECs1200      | -         | CDS  |
| Sakai/EDL933         | 1264475           | ns                | rec    | ECs1200      | -         | CDS  |
| Sakai/EDL933         | 1264658           | ns                | rec    | ECs1200      | -         | CDS  |
| Sakai/EDL933         | 1264769           | ns                | rec    | ECs1200      | -         | CDS  |
| Sakai/EDL933         | 1264770           | ns                | rec    | ECs1200      | -         | CDS  |
| Sakai/EDL933         | 1264808           | ns                | rec    | ECs1200      | -         | CDS  |
| Sakai/EDL933         | 1264907           | ns                | rec    | ECs1200      | -         | CDS  |
| Sakai/EDL933         | 1264919           | ns                | rec    | ECs1200      | -         | CDS  |
| Sakai/EDL933         | 1264934           | ns                | rec    | ECs1200      | -         | CDS  |
| Sakai/EDL933         | 1264944           | ns                | rec    | ECs1200      | -         | CDS  |
| Sakai/EDL933         | 1264990           | ns                | rec    | ECs1201      | -         | CDS  |
| Sakai/EDL933         | 1264993           | ns                | rec    | ECs1201      | -         | CDS  |
| EDL933               | 1357447           | i                 |        | intergenic   |           |      |
| EDL933               | 1379630           | ns                |        | ECs1241      | -         | CDS  |
| EDL933               | 1380292           | ns                |        | ECs1242      | -         | CDS  |
| EDL933               | 1383978           | ns                |        | ECs1242      | -         | CDS  |
| Sakai/EDL933         | 1304915           | ns                |        | ECs1244      | -         | CDS  |
| Sakai/EDL933         | 1306660           | ns                | rec    | ECs1247      | -         | CDS  |
| Sakai/EDL933         | 1306676           | s                 | rec    | ECs1247      | -         | CDS  |

| lineage <sup>a</sup> | site <sup>b</sup> | mutation          |        | gene         | Gene name | Type |
|----------------------|-------------------|-------------------|--------|--------------|-----------|------|
|                      |                   | type <sup>c</sup> | recomb |              |           |      |
| Sakai/EDL933         | 1306755           | ns                | rec    | ECs1247      | -         | CDS  |
| Sakai/EDL933         | 1306770           | ns                | rec    | ECs1247      | -         | CDS  |
| Sakai/EDL933         | 1306813           | indel             | rec    | ECs1248      | -         | CDS  |
| Sakai/EDL933         | 1306826           | ns                | rec    | ECs1248      | -         | CDS  |
| Sakai/EDL933         | 1306833           | ns                | rec    | ECs1248      | -         | CDS  |
| Sakai/EDL933         | 1306839           | ns                | rec    | ECs1248      | -         | CDS  |
| Sakai/EDL933         | 1306861           | s                 | rec    | ECs1248      | -         | CDS  |
| Sakai/EDL933         | 1307002           | ns                | rec    | ECs1248      | -         | CDS  |
| Sakai/EDL933         | 1307004           | ns                | rec    | ECs1248-1249 | -         | CDS  |
| Sakai/EDL933         | 1307008           | ns                | rec    | ECs1248-1249 | -         | CDS  |
| Sakai/EDL933         | 1307010           | ns                | rec    | ECs1248-1249 | -         | CDS  |
| Sakai/EDL933         | 1307291           | ns                | rec    | ECs1250      | -         | CDS  |
| Sakai/EDL933         | 1307292           | ns                | rec    | ECs1250      | -         | CDS  |
| Sakai/EDL933         | 1307305           | ns                | rec    | ECs1250      | -         | CDS  |
| Sakai/EDL933         | 1307306           | ns                | rec    | ECs1250      | -         | CDS  |
| Sakai/EDL933         | 1307314           | ns                | rec    | ECs1250      | -         | CDS  |
| Sakai/EDL933         | 1307317           | ns                | rec    | ECs1250      | -         | CDS  |
| Sakai/EDL933         | 1307319           | ns                | rec    | ECs1250      | -         | CDS  |
| Sakai/EDL933         | 1307325           | ns                | rec    | ECs1250      | -         | CDS  |
| Sakai/EDL933         | 1307335           | ns                | rec    | ECs1250      | -         | CDS  |
| Sakai/EDL933         | 1307338           | ns                | rec    | ECs1250      | -         | CDS  |
| Sakai/EDL933         | 1307343           | ns                | rec    | ECs1250      | -         | CDS  |
| Sakai/EDL933         | 1307344           | ns                | rec    | ECs1250      | -         | CDS  |
| Sakai/EDL933         | 1307346           | ns                | rec    | ECs1250      | -         | CDS  |
| Sakai/EDL933         | 1307347           | ns                | rec    | ECs1250      | -         | CDS  |
| Sakai/EDL933         | 1307350           | ns                | rec    | ECs1250      | -         | CDS  |
| Sakai/EDL933         | 1307353           | ns                | rec    | ECs1250      | -         | CDS  |
| Sakai/EDL933         | 1307354           | ns                | rec    | ECs1250      | -         | CDS  |
| Sakai/EDL933         | 1307359           | ns                | rec    | ECs1250      | -         | CDS  |
| Sakai/EDL933         | 1307370           | ns                | rec    | ECs1250      | -         | CDS  |
| Sakai/EDL933         | 1307371           | ns                | rec    | ECs1250      | -         | CDS  |
| Sakai/EDL933         | 1307383           | ns                | rec    | ECs1250      | -         | CDS  |
| EDL933               | 1391910           | ns                |        | ECs1251      | -         | CDS  |
| O157                 | 1309105           | del               |        | intergenic   |           |      |
| O157                 | 1310870           | ns                |        | G2583_1240   | rutF      | CDS  |
| CB9615               | 1296179           | ns                |        | G2583_1241   | rutE      | CDS  |
| O157                 | 1313206           | ns                |        | G2583_1244   | rutB      | CDS  |
| O157                 | 1313399           | s                 |        | G2583_1244   | rutB      | CDS  |
| O157                 | 1313591           | s                 |        | G2583_1244   | rutB      | CDS  |
| O157                 | 1314825           | ns                |        | G2583_1245   | rutA      | CDS  |
| CB9615               | 1301611           | s                 |        | G2583_1247   | putA      | CDS  |
| Sakai                | 1317211           | ns                |        | G2583_1247   | putA      | CDS  |
| CB9615               | 1302302           | ns                |        | G2583_1247   | putA      | CDS  |
| CB9615               | 1304300           | ns                |        | G2583_1247   | putA      | CDS  |
| CB9615               | 1304828           | i                 |        | intergenic   |           |      |

| lineage <sup>a</sup> | site <sup>b</sup> | mutation          |        | gene       | Gene name | Type       |
|----------------------|-------------------|-------------------|--------|------------|-----------|------------|
|                      |                   | type <sup>c</sup> | recomb |            |           |            |
| CB9615               | 1305638           | s                 |        | G2583_1248 | putP      | CDS        |
| CB9615               | 1305866           | s                 |        | G2583_1248 | putP      | CDS        |
| O157                 | 1321549           | s                 |        | G2583_1248 | putP      | CDS        |
| CB9615               | 1306455           | ins-7             |        | intergenic |           |            |
| CB9615               | 1307974           | i                 |        | intergenic |           |            |
| O157                 | 1323368           | ins               |        | intergenic |           |            |
| CB9615               | 1309018           | s                 |        | G2583_1251 | -         | CDS        |
| O157                 | 1327295           | ns                |        | G2583_1254 | ycdB      | CDS        |
| O157                 | 1327875           | i                 |        | intergenic |           |            |
| O157                 | 1330622           | ns                |        | G2583_1257 | pgaC      | CDS        |
| CB9615               | 1316705           | del               |        | G2583_1258 | pgaB      | pseudogene |
| CB9615               | 1317032           | nc                |        | G2583_1258 | pgaB      | pseudogene |
| O157                 | 1332703           | nc                |        | G2583_1258 | pgaB      | pseudogene |
| O157                 | 1335468           | i                 |        | intergenic |           |            |
| CB9615               | 1320380           | i                 |        | intergenic |           |            |
| CB9615               | 1320900           | nc                |        | G2583_1260 | ycdT      | pseudogene |
| CB9615               | 1320994           | del               |        | G2583_1260 | ycdT      | pseudogene |
| O55/O157             | 1323925           | ns                |        | G2583_1262 | fidL      | CDS        |
| O55/O157             | 1325205           | i                 |        | intergenic |           |            |
| O55/O157             | 1326226           | s                 |        | G2583_1264 | ygcW      | CDS        |
| O55/O157             | 1327265           | ns                |        | G2583_1265 | -         | CDS        |
| O55/O157             | 1328035           | ns                |        | G2583_1266 | mrkD      | CDS        |
| O55/O157             | 1333298           | i                 |        | intergenic |           |            |
| O55/O157             | 1337596           | s                 |        | G2583_1273 | -         | CDS        |
| O55/O157             | 1338704           | ns                |        | G2583_1274 | -         | CDS        |
| O55/O157             | 1338821           | ns                |        | G2583_1274 | -         | CDS        |
| O55/O157             | 1339221           | ns                |        | G2583_1274 | -         | CDS        |
| O55/O157             | 1341649           | ns                |        | G2583_1277 | cylZ      | CDS        |
| O55/O157             | 1342740           | ns                |        | G2583_1279 | gcvT      | CDS        |
| O55/O157             | 1343015           | s                 |        | G2583_1279 | gcvT      | CDS        |
| EDL933               | 1442315           | ns                |        | G2583_1279 | gcvT      | CDS        |
| O55/O157             | 1345873           | ns                |        | G2583_1280 | fabF      | CDS        |
| O55/O157             | 1349411           | s                 |        | G2583_1284 | -         | CDS        |
| O55/O157             | 1351716           | s                 |        | G2583_1287 | -         | CDS        |
| O55/O157             | 1352529           | s                 |        | G2583_1287 | -         | CDS        |
| CB9615               | 1354119           | s                 |        | G2583_1289 | ycdU      | CDS        |
| CB9615               | 1354282           | ns                |        | G2583_1289 | ycdU      | CDS        |
| CB9615               | 1354521           | ns                |        | G2583_1289 | ycdU      | CDS        |
| EDL933               | 1462501           | i                 |        | intergenic |           |            |
| EDL933               | 1466649           | ns                |        | ECs1307    | -         | CDS        |
| EDL933               | 1467619           | ns                |        | ECs1308    | -         | CDS        |
| EDL933               | 1467701           | s                 |        | ECs1309    | -         | CDS        |
| Sakai                | 1383967           | ns                |        | ECs1309    | -         | CDS        |
| EDL933               | 1481615           | ins               |        | ECs1332    | -         | CDS        |
| EDL933               | 1485047           | ns                |        | ECs1337    | -         | CDS        |

| lineage <sup>a</sup> | site <sup>b</sup> | mutation          |        | gene       | Gene name | Type |
|----------------------|-------------------|-------------------|--------|------------|-----------|------|
|                      |                   | type <sup>c</sup> | recomb |            |           |      |
| Sakai                | 1404441           | i                 |        | intergenic |           |      |
| Sakai/EDL933         | 1408882           | indel             |        | ECs1347    | -         | CDS  |
| Sakai/EDL933         | 1409533           | ns                |        | ECs1348    | -         | CDS  |
| EDL933               | 1495971           | i                 |        | intergenic |           |      |
| EDL933               | 1501974           | i                 |        | intergenic |           |      |
| Sakai                | 1418991           | s                 |        | ECs1360    | -         | CDS  |
| EDL933               | 1505129           | ins               |        | ECs1361    | -         | CDS  |
| EDL933               | 1507006           | i                 |        | intergenic |           |      |
| EDL933               | 1507913           | ins               |        | intergenic |           |      |
| Sakai/EDL933         | 1426613           | indel             |        | ECs1370    | -         | CDS  |
| EDL933               | 1516291           | ns                |        | ECs1380    | -         | CDS  |
| Sakai/EDL933         | 1437442           | indel             |        | ECs1385    | -         | CDS  |
| EDL933               | 1525470           | ns                |        | ECs1393    | -         | CDS  |
| EDL933               | 1527633           | i                 |        | intergenic |           |      |
| EDL933               | 1537072           | ns                |        | ECs1403    | -         | CDS  |
| EDL933               | 1537210           | ns                |        | ECs1403    | -         | CDS  |
| EDL933               | 1537727           | ns                | rec    | ECs1404    | -         | CDS  |
| EDL933               | 1537728           | ns                | rec    | ECs1404    | -         | CDS  |
| EDL933               | 1537729           | ns                | rec    | ECs1404    | -         | CDS  |
| EDL933               | 1537732           | ns                | rec    | ECs1404    | -         | CDS  |
| EDL933               | 1537733           | ns                | rec    | ECs1404    | -         | CDS  |
| EDL933               | 1537735           | ns                | rec    | ECs1404    | -         | CDS  |
| EDL933               | 1537738           | ns                | rec    | ECs1404    | -         | CDS  |
| EDL933               | 1537739           | ns                | rec    | ECs1404    | -         | CDS  |
| EDL933               | 1537740           | ns                | rec    | ECs1404    | -         | CDS  |
| EDL933               | 1537741           | ns                | rec    | ECs1404    | -         | CDS  |
| EDL933               | 1537742           | ns                | rec    | ECs1404    | -         | CDS  |
| EDL933               | 1537743           | ns                | rec    | ECs1404    | -         | CDS  |
| EDL933               | 1537744           | ns                | rec    | ECs1404    | -         | CDS  |
| EDL933               | 1537745           | ns                | rec    | ECs1404    | -         | CDS  |
| EDL933               | 1537746           | i                 | rec    | intergenic |           |      |
| EDL933               | 1537747           | i                 | rec    | intergenic |           |      |
| EDL933               | 1537748           | i                 | rec    | intergenic |           |      |
| EDL933               | 1537749           | i                 | rec    | intergenic |           |      |
| EDL933               | 1537750           | i                 | rec    | intergenic |           |      |
| EDL933               | 1537751           | i                 | rec    | intergenic |           |      |
| EDL933               | 1537753           | i                 | rec    | intergenic |           |      |
| EDL933               | 1537754           | i                 | rec    | intergenic |           |      |
| EDL933               | 1537755           | i                 | rec    | intergenic |           |      |
| EDL933               | 1537756           | i                 | rec    | intergenic |           |      |
| EDL933               | 1537757           | i                 | rec    | intergenic |           |      |
| EDL933               | 1537758           | i                 | rec    | intergenic |           |      |
| EDL933               | 1537759           | i                 | rec    | intergenic |           |      |
| EDL933               | 1537760           | i                 | rec    | intergenic |           |      |
| EDL933               | 1537763           | i                 | rec    | intergenic |           |      |

| lineage <sup>a</sup> | site <sup>b</sup> | mutation          |        | gene       | Gene name | Type |
|----------------------|-------------------|-------------------|--------|------------|-----------|------|
|                      |                   | type <sup>c</sup> | recomb |            |           |      |
| EDL933               | 1537764           | i                 | rec    | intergenic |           |      |
| EDL933               | 1537765           | i                 | rec    | intergenic |           |      |
| EDL933               | 1537766           | i                 | rec    | intergenic |           |      |
| EDL933               | 1537767           | i                 | rec    | intergenic |           |      |
| EDL933               | 1537768           | i                 | rec    | intergenic |           |      |
| EDL933               | 1537769           | i                 | rec    | intergenic |           |      |
| EDL933               | 1537770           | i                 | rec    | intergenic |           |      |
| EDL933               | 1537772           | i                 | rec    | intergenic |           |      |
| EDL933               | 1537773           | i                 | rec    | intergenic |           |      |
| EDL933               | 1537774           | i                 | rec    | intergenic |           |      |
| EDL933               | 1537776           | i                 | rec    | intergenic |           |      |
| EDL933               | 1537777           | i                 | rec    | intergenic |           |      |
| EDL933               | 1537778           | i                 | rec    | intergenic |           |      |
| EDL933               | 1537779           | i                 | rec    | intergenic |           |      |
| EDL933               | 1537780           | i                 | rec    | intergenic |           |      |
| EDL933               | 1537783           | i                 | rec    | intergenic |           |      |
| EDL933               | 1537785           | i                 | rec    | intergenic |           |      |
| EDL933               | 1537786           | i                 | rec    | intergenic |           |      |
| EDL933               | 1537787           | i                 | rec    | intergenic |           |      |
| EDL933               | 1537788           | i                 | rec    | intergenic |           |      |
| EDL933               | 1537789           | i                 | rec    | intergenic |           |      |
| EDL933               | 1537790           | i                 | rec    | intergenic |           |      |
| EDL933               | 1537791           | i                 | rec    | intergenic |           |      |
| EDL933               | 1537792           | i                 | rec    | intergenic |           |      |
| EDL933               | 1537793           | i                 | rec    | intergenic |           |      |
| EDL933               | 1537794           | i                 | rec    | intergenic |           |      |
| EDL933               | 1537795           | i                 | rec    | intergenic |           |      |
| EDL933               | 1537796           | i                 | rec    | intergenic |           |      |
| EDL933               | 1537797           | i                 | rec    | intergenic |           |      |
| EDL933               | 1537799           | i                 | rec    | intergenic |           |      |
| EDL933               | 1537800           | i                 | rec    | intergenic |           |      |
| EDL933               | 1537802           | i                 | rec    | intergenic |           |      |
| EDL933               | 1537803           | i                 | rec    | intergenic |           |      |
| EDL933               | 1537805           | i                 | rec    | intergenic |           |      |
| EDL933               | 1537806           | i                 | rec    | intergenic |           |      |
| EDL933               | 1537807           | i                 | rec    | intergenic |           |      |
| EDL933               | 1537809           | i                 | rec    | intergenic |           |      |
| EDL933               | 1537810           | i                 | rec    | intergenic |           |      |
| EDL933               | 1537812           | i                 | rec    | intergenic |           |      |
| EDL933               | 1537814           | i                 | rec    | intergenic |           |      |
| EDL933               | 1537816           | i                 | rec    | intergenic |           |      |
| EDL933               | 1537818           | i                 | rec    | intergenic |           |      |
| EDL933               | 1537819           | i                 | rec    | intergenic |           |      |
| EDL933               | 1537820           | i                 | rec    | intergenic |           |      |
| EDL933               | 1537821           | i                 | rec    | intergenic |           |      |

| lineage <sup>a</sup> | site <sup>b</sup> | mutation          |        | gene       | Gene name | Type |
|----------------------|-------------------|-------------------|--------|------------|-----------|------|
|                      |                   | type <sup>c</sup> | recomb |            |           |      |
| EDL933               | 1537822           | i                 | rec    | intergenic |           |      |
| EDL933               | 1537823           | i                 | rec    | intergenic |           |      |
| EDL933               | 1537824           | i                 | rec    | intergenic |           |      |
| EDL933               | 1537826           | i                 | rec    | intergenic |           |      |
| EDL933               | 1537827           | i                 | rec    | intergenic |           |      |
| EDL933               | 1537828           | i                 | rec    | intergenic |           |      |
| EDL933               | 1537829           | i                 | rec    | intergenic |           |      |
| EDL933               | 1537830           | i                 | rec    | intergenic |           |      |
| EDL933               | 1537832           | i                 | rec    | intergenic |           |      |
| EDL933               | 1537833           | i                 | rec    | intergenic |           |      |
| EDL933               | 1537834           | i                 | rec    | intergenic |           |      |
| EDL933               | 1537835           | i                 | rec    | intergenic |           |      |
| EDL933               | 1537836           | i                 | rec    | intergenic |           |      |
| EDL933               | 1537837           | i                 | rec    | intergenic |           |      |
| EDL933               | 1537840           | i                 | rec    | intergenic |           |      |
| EDL933               | 1537841           | i                 | rec    | intergenic |           |      |
| EDL933               | 1537842           | i                 | rec    | intergenic |           |      |
| EDL933               | 1537843           | i                 | rec    | intergenic |           |      |
| EDL933               | 1537893           | i                 |        | intergenic |           |      |
| O157                 | 1456933           | i                 |        | intergenic |           |      |
| O157                 | 1457156           | ns                |        | G2583_1291 | ghrA      | CDS  |
| CB9615               | 1355672           | ns                |        | G2583_1291 | ghrA      | CDS  |
| O157                 | 1457566           | ns                |        | G2583_1291 | ghrA      | CDS  |
| O157                 | 1462537           | i                 |        | intergenic |           |      |
| EDL933               | 1547749           | ins               |        | intergenic |           |      |
| CB9615               | 1371194           | ns                |        | G2583_1309 | yceK      | CDS  |
| O157                 | 1474522           | ns                |        | G2583_1312 | mdtG      | CDS  |
| CB9615               | 1374367           | i                 |        | intergenic |           |      |
| O157                 | 1477504           | s                 |        | G2583_1315 | yceI      | CDS  |
| CB9615               | 1376344           | s                 |        | G2583_1316 | yceJ      | CDS  |
| CB9615               | 1376363           | ns                |        | G2583_1316 | yceJ      | CDS  |
| CB9615               | 1378271           | i                 |        | intergenic |           |      |
| CB9615               | 1378863           | s                 |        | G2583_1320 | dinI      | CDS  |
| O157                 | 1480670           | i                 |        | intergenic |           |      |
| CB9615               | 1381340           | s                 |        | G2583_1323 | grxB      | CDS  |
| CB9615               | 1385077           | s                 |        | G2583_1327 | yceM      | CDS  |
| O157                 | 1487937           | s                 |        | G2583_1328 | yceN      | CDS  |
| CB9615               | 1386770           | s                 |        | G2583_1328 | yceN      | CDS  |
| O157                 | 1489450           | s                 |        | G2583_1331 | flgA      | CDS  |
| O157                 | 1490050           | i                 |        | intergenic |           |      |
| CB9615               | 1392294           | s                 |        | G2583_1337 | flgG      | CDS  |
| O157                 | 1494084           | s                 |        | G2583_1337 | flgG      | CDS  |
| CB9615               | 1393193           | s                 |        | G2583_1338 | flgH      | CDS  |
| CB9615               | 1393561           | s                 |        | G2583_1338 | flgH      | CDS  |
| CB9615               | 1396548           | ns                |        | G2583_1341 | flgK      | CDS  |

| lineage <sup>a</sup> | site <sup>b</sup> | mutation          |        | gene       | Gene name | Type |
|----------------------|-------------------|-------------------|--------|------------|-----------|------|
|                      |                   | type <sup>c</sup> | recomb |            |           |      |
| CB9615               | 1396667           | ns                |        | G2583_1341 | flgK      | CDS  |
| CB9615               | 1396708           | s                 |        | G2583_1341 | flgK      | CDS  |
| O157                 | 1500144           | i                 |        | intergenic |           |      |
| Sakai                | 1501902           | s                 |        | G2583_1343 | rne       | CDS  |
| CB9615               | 1403192           | ns                |        | G2583_1345 | rluC      | CDS  |
| CB9615               | 1403319           | ns                |        | G2583_1345 | rluC      | CDS  |
| O157                 | 1505031           | del-11            |        | intergenic |           |      |
| Sakai                | 1505266           | ns                |        | G2583_1346 | yceF      | CDS  |
| CB9615               | 1403981           | s                 |        | G2583_1346 | yceF      | CDS  |
| CB9615               | 1408747           | s                 |        | G2583_1353 | fabG      | CDS  |
| O157                 | 1510369           | ns                |        | G2583_1353 | fabG      | CDS  |
| O157                 | 1510808           | s                 |        | G2583_1354 | acpP      | CDS  |
| CB9615               | 1410989           | ns                |        | G2583_1356 | pabC      | CDS  |
| O157                 | 1512902           | ns                |        | G2583_1356 | pabC      | CDS  |
| CB9615               | 1411746           | ns                |        | G2583_1357 | yceG      | CDS  |
| O157                 | 1514408           | ns                |        | G2583_1358 | tmk       | CDS  |
| EDL933               | 1601792           | ins               |        | intergenic |           |      |
| CB9615               | 1419009           | del-9             |        | G2583_1362 | fhuE      | CDS  |
| O157                 | 1520731           | i                 |        | intergenic |           |      |
| EDL933               | 1605834           | ins-7             |        | intergenic |           |      |
| O157                 | 1520747           | ins-12            |        | intergenic |           |      |
| EDL933               | 1605879           | ins               |        | intergenic |           |      |
| CB9615               | 1420962           | s                 |        | G2583_1366 | thiK      | CDS  |
| O157                 | 1524001           | ns                |        | G2583_1367 | nagZ      | CDS  |
| EDL933               | 1610100           | ins               |        | intergenic |           |      |
| CB9615               | 1424402           | s                 |        | G2583_1369 | ndh       | CDS  |
| CB9615               | 1426328           | s                 |        | G2583_1371 | ycfQ      | CDS  |
| CB9615               | 1427164           | ns                |        | G2583_1373 | ycfS      | CDS  |
| O157                 | 1530771           | s                 |        | G2583_1374 | mfd       | CDS  |
| O157                 | 1531911           | s                 |        | G2583_1374 | mfd       | CDS  |
| CB9615               | 1431302           | s                 |        | G2583_1374 | mfd       | CDS  |
| O157                 | 1533239           | ns                |        | G2583_1375 | ycfT      | CDS  |
| CB9615               | 1431989           | ns                |        | G2583_1375 | ycfT      | CDS  |
| O157                 | 1536286           | s                 |        | G2583_1377 | lolD      | CDS  |
| CB9615               | 1434947           | s                 |        | G2583_1378 | lolE      | CDS  |
| Sakai                | 1537161           | s                 |        | G2583_1378 | lolE      | CDS  |
| O157                 | 1538337           | ns                |        | G2583_1379 | nagK      | CDS  |
| O157                 | 1539725           | ns                |        | G2583_1381 | potD      | CDS  |
| O157                 | 1540899           | s                 |        | G2583_1382 | potC      | CDS  |
| CB9615               | 1439902           | s                 |        | G2583_1383 | potB      | CDS  |
| Sakai                | 1545192           | i                 |        | intergenic |           |      |
| EDL933               | 1632320           | ns                |        | ECs1510    | -         | CDS  |
| EDL933               | 1632848           | ns                |        | ECs1511    | -         | CDS  |
| EDL933               | 1636139           | ns                |        | ECs1519    | -         | CDS  |
| Sakai/EDL933         | 1552060           | ns                | rec    | ECs1522    | -         | CDS  |



| lineage <sup>a</sup> | site <sup>b</sup> | mutation          |        | gene    | Gene name | Type |
|----------------------|-------------------|-------------------|--------|---------|-----------|------|
|                      |                   | type <sup>c</sup> | recomb |         |           |      |
| Sakai/EDL933         | 1552061           | ns                | rec    | ECs1522 | -         | CDS  |
| Sakai/EDL933         | 1552064           | ns                | rec    | ECs1522 | -         | CDS  |
| Sakai/EDL933         | 1552079           | ns                | rec    | ECs1522 | -         | CDS  |
| Sakai/EDL933         | 1552088           | ns                | rec    | ECs1522 | -         | CDS  |
| Sakai/EDL933         | 1552094           | ns                | rec    | ECs1522 | -         | CDS  |
| Sakai/EDL933         | 1552097           | ns                | rec    | ECs1522 | -         | CDS  |
| Sakai/EDL933         | 1552151           | ns                | rec    | ECs1522 | -         | CDS  |
| Sakai/EDL933         | 1552154           | ns                | rec    | ECs1522 | -         | CDS  |
| Sakai/EDL933         | 1552163           | ns                | rec    | ECs1522 | -         | CDS  |
| Sakai/EDL933         | 1552166           | ns                | rec    | ECs1522 | -         | CDS  |
| Sakai/EDL933         | 1552172           | ns                | rec    | ECs1522 | -         | CDS  |
| Sakai/EDL933         | 1552175           | ns                | rec    | ECs1522 | -         | CDS  |
| Sakai/EDL933         | 1552215           | ns                | rec    | ECs1522 | -         | CDS  |
| Sakai/EDL933         | 1552223           | ns                | rec    | ECs1522 | -         | CDS  |
| Sakai/EDL933         | 1552239           | ns                | rec    | ECs1522 | -         | CDS  |
| Sakai/EDL933         | 1552240           | ns                | rec    | ECs1522 | -         | CDS  |
| Sakai/EDL933         | 1552247           | ns                | rec    | ECs1522 | -         | CDS  |
| Sakai/EDL933         | 1552250           | ns                | rec    | ECs1522 | -         | CDS  |
| Sakai/EDL933         | 1552259           | ns                | rec    | ECs1522 | -         | CDS  |
| Sakai/EDL933         | 1552283           | ns                | rec    | ECs1522 | -         | CDS  |
| Sakai/EDL933         | 1552287           | ns                | rec    | ECs1522 | -         | CDS  |
| Sakai/EDL933         | 1552300           | ns                | rec    | ECs1522 | -         | CDS  |
| Sakai/EDL933         | 1552307           | ns                | rec    | ECs1522 | -         | CDS  |
| Sakai/EDL933         | 1552308           | ns                | rec    | ECs1522 | -         | CDS  |
| Sakai/EDL933         | 1552313           | ns                | rec    | ECs1522 | -         | CDS  |
| Sakai/EDL933         | 1552316           | ns                | rec    | ECs1522 | -         | CDS  |
| Sakai/EDL933         | 1552319           | ns                | rec    | ECs1522 | -         | CDS  |
| Sakai/EDL933         | 1552324           | ns                | rec    | ECs1522 | -         | CDS  |
| Sakai/EDL933         | 1552325           | ns                | rec    | ECs1522 | -         | CDS  |
| Sakai/EDL933         | 1552334           | ns                | rec    | ECs1522 | -         | CDS  |
| Sakai/EDL933         | 1552340           | ns                | rec    | ECs1522 | -         | CDS  |
| Sakai/EDL933         | 1552343           | ns                | rec    | ECs1522 | -         | CDS  |
| Sakai/EDL933         | 1552345           | ns                | rec    | ECs1522 | -         | CDS  |
| Sakai/EDL933         | 1552346           | ns                | rec    | ECs1522 | -         | CDS  |
| Sakai/EDL933         | 1552449           | ns                | rec    | ECs1522 | -         | CDS  |
| Sakai/EDL933         | 1552524           | ns                | rec    | ECs1522 | -         | CDS  |
| Sakai/EDL933         | 1552534           | ns                | rec    | ECs1522 | -         | CDS  |
| Sakai/EDL933         | 1552658           | ns                | rec    | ECs1522 | -         | CDS  |
| Sakai/EDL933         | 1552799           | ns                | rec    | ECs1522 | -         | CDS  |
| Sakai/EDL933         | 1552858           | ns                | rec    | ECs1523 | -         | CDS  |
| Sakai/EDL933         | 1552992           | ns                | rec    | ECs1523 | -         | CDS  |
| Sakai/EDL933         | 1553000           | ns                | rec    | ECs1523 | -         | CDS  |
| Sakai/EDL933         | 1553006           | ns                | rec    | ECs1523 | -         | CDS  |
| Sakai/EDL933         | 1553015           | ns                | rec    | ECs1523 | -         | CDS  |
| Sakai/EDL933         | 1553018           | ns                | rec    | ECs1523 | -         | CDS  |

| lineage <sup>a</sup> | site <sup>b</sup> | mutation          |        | gene         | Gene name | Type |
|----------------------|-------------------|-------------------|--------|--------------|-----------|------|
|                      |                   | type <sup>c</sup> | recomb |              |           |      |
| Sakai/EDL933         | 1553051           | ns                | rec    | ECs1523      | -         | CDS  |
| Sakai/EDL933         | 1553063           | ns                | rec    | ECs1523      | -         | CDS  |
| Sakai/EDL933         | 1571409           | ns                | rec    | ECs1550      | -         | CDS  |
| CB9615               | 1439906           | del               |        | intergenic   |           |      |
| EDL933               | 1658523           | ns                |        | ECs1552      | -         | CDS  |
| Sakai                | 1572531           | ins               |        | ECs1552-1553 | -         | CDS  |
| Sakai/EDL933         | 1576601           | indel             |        | ECs1556      | -         | CDS  |
| Sakai/EDL933         | 1663238           | indel             |        | ECs1560      | -         | CDS  |
| EDL933               | 1663828           | ns                |        | ECs1560      | -         | CDS  |
| Sakai/EDL933         | 1666646           | indel             |        | ECs1561      | -         | CDS  |
| EDL933               | 1668330           | ns                |        | ECs1561      | -         | CDS  |
| EDL933               | 1668336           | ns                |        | ECs1561      | -         | CDS  |
| EDL933               | 1668373           | ns                |        | ECs1561      | -         | CDS  |
| O157                 | 1590628           | ns                |        | G2583_1383   | -         | CDS  |
| Sakai                | 1592092           | i                 |        | intergenic   |           |      |
| CB9615               | 1442704           | s                 |        | G2583_1385   | pepT      | CDS  |
| O55/O157             | 1445562           | s                 | rec    | G2583_1387   | -         | CDS  |
| O55/O157             | 1445568           | s                 | rec    | G2583_1387   | -         | CDS  |
| O55/O157             | 1445571           | s                 | rec    | G2583_1387   | -         | CDS  |
| O55/O157             | 1445589           | s                 | rec    | G2583_1387   | -         | CDS  |
| O55/O157             | 1445592           | s                 | rec    | G2583_1387   | -         | CDS  |
| O55/O157             | 1445604           | s                 | rec    | G2583_1387   | -         | CDS  |
| O55/O157             | 1445629           | ns                | rec    | G2583_1387   | -         | CDS  |
| O55/O157             | 1445664           | s                 | rec    | G2583_1387   | -         | CDS  |
| O55/O157             | 1445691           | s                 | rec    | G2583_1387   | -         | CDS  |
| O55/O157             | 1445692           | ns                | rec    | G2583_1387   | -         | CDS  |
| O55/O157             | 1445694           | ns                | rec    | G2583_1387   | -         | CDS  |
| O55/O157             | 1445700           | s                 | rec    | G2583_1387   | -         | CDS  |
| O55/O157             | 1445709           | s                 | rec    | G2583_1387   | -         | CDS  |
| O55/O157             | 1445712           | s                 | rec    | G2583_1387   | -         | CDS  |
| O55/O157             | 1445724           | s                 | rec    | G2583_1387   | -         | CDS  |
| O55/O157             | 1445733           | s                 | rec    | G2583_1387   | -         | CDS  |
| O55/O157             | 1445754           | s                 | rec    | G2583_1387   | -         | CDS  |
| O55/O157             | 1445781           | s                 | rec    | G2583_1387   | -         | CDS  |
| O55/O157             | 1445802           | s                 | rec    | G2583_1387   | -         | CDS  |
| O55/O157             | 1445808           | s                 | rec    | G2583_1387   | -         | CDS  |
| O55/O157             | 1445811           | s                 | rec    | G2583_1387   | -         | CDS  |
| O55/O157             | 1445886           | s                 | rec    | G2583_1387   | -         | CDS  |
| O55/O157             | 1445990           | indel             | rec    | intergenic   |           |      |
| O55/O157             | 1446004           | i                 | rec    | intergenic   |           |      |
| O55/O157             | 1446042           | i                 | rec    | intergenic   |           |      |
| O55/O157             | 1446067           | i                 | rec    | intergenic   |           |      |
| O55/O157             | 1446179           | i                 | rec    | intergenic   |           |      |
| O55/O157             | 1446234           | i                 | rec    | intergenic   |           |      |
| O55/O157             | 1446356           | s                 | rec    | G2583_1388   | -         | CDS  |

| lineage <sup>a</sup> | site <sup>b</sup> | mutation          |        | gene       | Gene name | Type |
|----------------------|-------------------|-------------------|--------|------------|-----------|------|
|                      |                   | type <sup>c</sup> | recomb |            |           |      |
| O55/O157             | 1446552           | ns                | rec    | G2583_1389 | -         | CDS  |
| O55/O157             | 1446647           | s                 | rec    | G2583_1390 | -         | CDS  |
| O55/O157             | 1446652           | ns                | rec    | G2583_1390 | -         | CDS  |
| O55/O157             | 1446658           | ns                | rec    | G2583_1390 | -         | CDS  |
| O55/O157             | 1446680           | s                 | rec    | G2583_1390 | -         | CDS  |
| O55/O157             | 1446738           | ns                | rec    | G2583_1390 | -         | CDS  |
| O55/O157             | 1446740           | ns                | rec    | G2583_1390 | -         | CDS  |
| O55/O157             | 1446746           | s                 | rec    | G2583_1390 | -         | CDS  |
| O55/O157             | 1446748           | ns                | rec    | G2583_1390 | -         | CDS  |
| O55/O157             | 1446804           | ns                | rec    | G2583_1390 | -         | CDS  |
| O55/O157             | 1446841           | ns                | rec    | G2583_1390 | -         | CDS  |
| O55/O157             | 1446846           | ns                | rec    | G2583_1390 | -         | CDS  |
| O55/O157             | 1446893           | s                 | rec    | G2583_1390 | -         | CDS  |
| O55/O157             | 1447055           | ns                | rec    | G2583_1390 | -         | CDS  |
| Sakai                | 1599400           | ins               |        | ECs1582    | -         | CDS  |
| EDL933               | 1683393           | del               |        | ECs1582    | -         | CDS  |
| Sakai                | 1599494           | del               |        | intergenic |           |      |
| Sakai                | 1599684           | ins               |        | ECs1583    | -         | CDS  |
| Sakai                | 1599754           | ins               |        | intergenic |           |      |
| EDL933               | 1688625           | ns                |        | ECs1592    | -         | CDS  |
| Sakai                | 1607790           | ns                |        | ECs1598    | -         | CDS  |
| EDL933               | 1692998           | ns                |        | ECs1599    | -         | CDS  |
| O157                 | 1610142           | ns                |        | G2583_1405 | phoQ      | CDS  |
| O157                 | 1610519           | ns                |        | G2583_1405 | phoQ      | CDS  |
| EDL933               | 1696596           | s                 |        | G2583_1407 | purB      | CDS  |
| CB9615               | 1458735           | s                 |        | G2583_1407 | purB      | CDS  |
| CB9615               | 1459722           | s                 |        | G2583_1408 | hflD      | CDS  |
| O157                 | 1615966           | s                 |        | G2583_1410 | nudJ      | CDS  |
| CB9615               | 1461967           | s                 |        | G2583_1411 | rluE      | CDS  |
| O55/O157             | 1463703           | s                 | rec    | G2583_1412 | icd       | CDS  |
| O55/O157             | 1463754           | s                 | rec    | G2583_1412 | icd       | CDS  |
| O55/O157             | 1463802           | s                 | rec    | G2583_1412 | icd       | CDS  |
| O55/O157             | 1463820           | s                 | rec    | G2583_1412 | icd       | CDS  |
| O55/O157             | 1463829           | s                 | rec    | G2583_1412 | icd       | CDS  |
| O55/O157             | 1463844           | s                 | rec    | G2583_1412 | icd       | CDS  |
| EDL933               | 1704396           | ins               |        | ECs1611    | -         | CDS  |
| EDL933               | 1704550           | ins               |        | ECs1612    | -         | CDS  |
| EDL933               | 1715423           | ns                | rec    | ECs1630    | -         | CDS  |
| EDL933               | 1715588           | ns                | rec    | ECs1630    | -         | CDS  |
| EDL933               | 1715669           | ns                | rec    | ECs1630    | -         | CDS  |
| EDL933               | 1715681           | ns                | rec    | ECs1630    | -         | CDS  |
| EDL933               | 1715750           | ns                | rec    | ECs1630    | -         | CDS  |
| EDL933               | 1715792           | ns                | rec    | ECs1630    | -         | CDS  |
| EDL933               | 1715849           | ns                | rec    | ECs1630    | -         | CDS  |
| EDL933               | 1715993           | ns                | rec    | ECs1630    | -         | CDS  |

| lineage <sup>a</sup> | site <sup>b</sup> | mutation          |        | gene       | Gene name | Type |
|----------------------|-------------------|-------------------|--------|------------|-----------|------|
|                      |                   | type <sup>c</sup> | recomb |            |           |      |
| EDL933               | 1716017           | ns                | rec    | ECs1630    | -         | CDS  |
| EDL933               | 1716239           | ns                | rec    | ECs1630    | -         | CDS  |
| Sakai                | 1633414           | ns                |        | ECs1632    | -         | CDS  |
| EDL933               | 1719535           | ns                |        | ECs1633    | -         | CDS  |
| EDL933               | 1719899           | s                 |        | ECs1634    | -         | CDS  |
| EDL933               | 1719900           | ins               |        | ECs1634    | -         | CDS  |
| EDL933               | 1719949           | i                 |        | intergenic |           |      |
| EDL933               | 1719951           | i                 |        | intergenic |           |      |
| Sakai                | 1637604           | ns                |        | ECs1637    | -         | CDS  |
| Sakai/EDL933         | 1649126           | ns                | rec    | ECs1649    | -         | CDS  |
| Sakai/EDL933         | 1649147           | ns                | rec    | ECs1649    | -         | CDS  |
| Sakai/EDL933         | 1649165           | ns                | rec    | ECs1649    | -         | CDS  |
| Sakai/EDL933         | 1649246           | ns                | rec    | ECs1649    | -         | CDS  |
| Sakai/EDL933         | 1649333           | ns                | rec    | ECs1649    | -         | CDS  |
| Sakai/EDL933         | 1649356           | ns                | rec    | ECs1649    | -         | CDS  |
| Sakai/EDL933         | 1649420           | ns                | rec    | ECs1649    | -         | CDS  |
| Sakai/EDL933         | 1649438           | ns                | rec    | ECs1649    | -         | CDS  |
| Sakai/EDL933         | 1649444           | ns                | rec    | ECs1649    | -         | CDS  |
| EDL933               | 1741635           | ns                |        | ECs1650    | -         | CDS  |
| Sakai                | 1657028           | ns                |        | ECs1658    | -         | CDS  |
| EDL933               | 1749013           | ins               |        | ECs1658    | -         | CDS  |
| EDL933               | 1749070           | ns                |        | ECs1659    | -         | CDS  |
| EDL933               | 1749082           | ins               |        | ECs1659    | -         | CDS  |
| EDL933               | 1749092           | ins               |        | ECs1659    | -         | CDS  |
| EDL933               | 1749152           | ns                | rec    | ECs1659    | -         | CDS  |
| EDL933               | 1749161           | ns                | rec    | ECs1659    | -         | CDS  |
| EDL933               | 1749195           | ns                | rec    | ECs1659    | -         | CDS  |
| EDL933               | 1749196           | ns                | rec    | ECs1659    | -         | CDS  |
| EDL933               | 1749199           | ins-2             | rec    | ECs1659    | -         | CDS  |
| EDL933               | 1749206           | ns                | rec    | ECs1659    | -         | CDS  |
| EDL933               | 1749212           | ns                | rec    | ECs1659    | -         | CDS  |
| EDL933               | 1749216           | ins               | rec    | ECs1659    | -         | CDS  |
| EDL933               | 1749226           | ns                | rec    | ECs1659    | -         | CDS  |
| EDL933               | 1749239           | ins               | rec    | ECs1659    | -         | CDS  |
| EDL933               | 1749244           | ns                | rec    | ECs1659    | -         | CDS  |
| EDL933               | 1749245           | ns                | rec    | ECs1659    | -         | CDS  |
| EDL933               | 1749249           | ins               | rec    | ECs1659    | -         | CDS  |
| EDL933               | 1749250           | ns                | rec    | ECs1659    | -         | CDS  |
| EDL933               | 1749268           | ins               | rec    | ECs1659    | -         | CDS  |
| EDL933               | 1749290           | ns                | rec    | ECs1659    | -         | CDS  |
| EDL933               | 1749293           | ns                | rec    | ECs1659    | -         | CDS  |
| EDL933               | 1749294           | ns                | rec    | ECs1659    | -         | CDS  |
| EDL933               | 1749295           | ns                | rec    | ECs1659    | -         | CDS  |
| EDL933               | 1749312           | ns                | rec    | ECs1659    | -         | CDS  |
| EDL933               | 1749333           | ns                | rec    | ECs1659    | -         | CDS  |

| lineage <sup>a</sup> | site <sup>b</sup> | mutation          |        | gene       | Gene name | Type |
|----------------------|-------------------|-------------------|--------|------------|-----------|------|
|                      |                   | type <sup>c</sup> | recomb |            |           |      |
| EDL933               | 1749341           | ns                | rec    | ECs1659    | -         | CDS  |
| EDL933               | 1749343           | ns                | rec    | ECs1659    | -         | CDS  |
| EDL933               | 1754044           | i                 |        | intergenic |           |      |
| EDL933               | 1754081           | ins               |        | intergenic |           |      |
| EDL933               | 1755379           | ns                |        | ECs1666    | -         | CDS  |
| EDL933               | 1755494           | ns                |        | ECs1666    | -         | CDS  |
| Sakai                | 1664318           | ns                |        | ECs1666    | -         | CDS  |
| CB9615               | 1478774           | ns                |        | G2583_1432 | ypjA      | CDS  |
| O157                 | 1668969           | i                 |        | intergenic |           |      |
| EDL933               | 1760503           | ins               |        | G2583_1438 | -         | CDS  |
| CB9615               | 1485267           | ns                |        | G2583_1442 | hlyE      | CDS  |
| O157                 | 1675796           | s                 |        | G2583_1447 | nhaB      | CDS  |
| CB9615               | 1492633           | i                 |        | intergenic |           |      |
| CB9615               | 1492634           | ins               |        | intergenic |           |      |
| CB9615               | 1493359           | ns                |        | G2583_1450 | dadA      | CDS  |
| Sakai                | 1681338           | ns                |        | G2583_1451 | dadX      | CDS  |
| Sakai                | 1681339           | ns                |        | G2583_1451 | dadX      | CDS  |
| Sakai                | 1681342           | ns                |        | G2583_1451 | dadX      | CDS  |
| Sakai                | 1681360           | ins               |        | G2583_1451 | dadX      | CDS  |
| Sakai                | 1681748           | del               |        | G2583_1452 | ipaH      | CDS  |
| EDL933               | 1773155           | del               |        | G2583_1453 | -         | CDS  |
| O157                 | 1687920           | ns                |        | G2583_1459 | prpA      | CDS  |
| O157                 | 1688820           | ns                |        | G2583_1459 | prpA      | CDS  |
| CB9615               | 1503339           | ns                |        | G2583_1459 | prpA      | CDS  |
| O157                 | 1690889           | ns                |        | G2583_1461 | -         | CDS  |
| CB9615               | 1510826           | i                 |        | intergenic |           |      |
| O157                 | 1696836           | ns                |        | G2583_1468 | dhaM      | CDS  |
| CB9615               | 1512932           | ns                |        | G2583_1469 | dhaL      | CDS  |
| O55/O157             | 1513217           | ns                |        | G2583_1470 | dhaK      | CDS  |
| O157                 | 1702338           | i                 |        | intergenic |           |      |
| O157                 | 1703964           | s                 |        | G2583_1475 | pth       | CDS  |
| EDL933               | 1797852           | s                 |        | G2583_1477 | ychM      | CDS  |
| EDL933               | 1802448           | ns                |        | G2583_1482 | prfA      | CDS  |
| O157                 | 1714840           | ns                |        | G2583_1486 | kdsA      | CDS  |
| O157                 | 1715760           | del-6             |        | intergenic |           |      |
| EDL933               | 1807802           | ins               |        | intergenic |           |      |
| O157                 | 1723107           | ns                |        | G2583_1495 | -         | CDS  |
| O157                 | 1723540           | s                 |        | G2583_1496 | narK      | CDS  |
| O157                 | 1723961           | ns                |        | G2583_1496 | narK      | CDS  |
| O157                 | 1724806           | i                 |        | intergenic |           |      |
| CB9615               | 1542317           | i                 |        | intergenic |           |      |
| CB9615               | 1542331           | i                 |        | intergenic |           |      |
| EDL933               | 1818849           | s                 |        | G2583_1497 | narG      | CDS  |
| CB9615               | 1546652           | s                 |        | G2583_1498 | narH      | CDS  |
| O157                 | 1729903           | s                 |        | G2583_1498 | narH      | CDS  |

| lineage <sup>a</sup> | site <sup>b</sup> | mutation          |        | gene            | Gene name   | Type       |
|----------------------|-------------------|-------------------|--------|-----------------|-------------|------------|
|                      |                   | type <sup>c</sup> | recomb |                 |             |            |
| CB9615               | 1549440           | nc                | rec    | G2583_1501-1502 | -           | pseudogene |
| CB9615               | 1549452           | nc                | rec    | G2583_1501-1502 | -           | pseudogene |
| CB9615               | 1549473           | nc                | rec    | G2583_1501-1502 | -           | pseudogene |
| CB9615               | 1549494           | nc                | rec    | G2583_1501-1502 | -           | pseudogene |
| CB9615               | 1549506           | nc                | rec    | G2583_1501-1502 | -           | pseudogene |
| O157                 | 1732419           | ns                |        | G2583_1501-1504 | yehS        | CDS        |
| CB9615               | 1552984           | ns                |        | G2583_1509      | rssB        | CDS        |
| CB9615               | 1554968           | s                 |        | G2583_1511      | hns         | CDS        |
| CB9615               | 1559499           | i                 |        | intergenic      |             |            |
| O157                 | 1742449           | i                 |        | intergenic      |             |            |
| EDL933               | 1835258           | ins               |        | intergenic      |             |            |
| CB9615               | 1560684           | i                 |        | intergenic      |             |            |
| CB9615               | 1561112           | i                 |        | intergenic      |             |            |
| CB9615               | 1561322           | s                 |        | G2583_1515      | oppA        | CDS        |
| O157                 | 1746954           | s                 |        | G2583_1517      | oppC        | CDS        |
| CB9615               | 1566220           | ns                |        | G2583_1519      | oppF        | CDS        |
| O157                 | 1750924           | ns                |        | G2583_1521      | cls         | CDS        |
| EDL933               | 1843596           | ins               |        | G2583_1522      | yciY        | CDS        |
| CB9615               | 1569663           | ns                |        | G2583_1523      | kch         | CDS        |
| EDL933               | 1845763           | ins               |        | intergenic      |             |            |
| CB9615               | 1571179           | i                 |        | intergenic      |             |            |
| CB9615               | 1571207           | ns                |        | G2583_1525      | tonB        | CDS        |
| CB9615               | 1571265           | ns                |        | G2583_1525      | tonB        | CDS        |
| O157                 | 1754756           | ns                |        | G2583_1526      | yciA        | CDS        |
| O157                 | 1757422           | ns                |        | G2583_1529-1530 | ompW - intE | CDS        |
| CB9615               | 1574689           | ns                |        | G2583_1529-1530 | ompW - intE | CDS        |
| CB9615               | 1574765           | del-13            |        | G2583_1530      | intE        | CDS        |
| CB9615               | 1574800           | ins               |        | G2583_1530      | intE        | CDS        |
| O157                 | 1757699           | s                 |        | G2583_1530      | intE        | CDS        |
| CB9615               | 1575107           | s                 |        | G2583_1530      | intE        | CDS        |
| CB9615               | 1575186           | ns                |        | G2583_1530      | intE        | CDS        |
| CB9615               | 1575371           | s                 |        | G2583_1530      | intE        | CDS        |
| O157                 | 1758846           | s                 |        | G2583_1531      | xisE        | CDS        |
| CB9615               | 1576227           | ns                | rec    | G2583_1532      | exoO        | CDS        |
| CB9615               | 1576244           | ns                | rec    | G2583_1532      | exoO        | CDS        |
| CB9615               | 1576245           | ns                | rec    | G2583_1532      | exoO        | CDS        |
| CB9615               | 1576273           | s                 | rec    | G2583_1532      | exoO        | CDS        |
| CB9615               | 1576279           | s                 | rec    | G2583_1532      | exoO        | CDS        |
| CB9615               | 1576282           | s                 | rec    | G2583_1532      | exoO        | CDS        |
| CB9615               | 1576288           | s                 | rec    | G2583_1532      | exoO        | CDS        |
| CB9615               | 1576309           | s                 | rec    | G2583_1532      | exoO        | CDS        |
| CB9615               | 1576315           | s                 | rec    | G2583_1532      | exoO        | CDS        |
| CB9615               | 1576335           | ns                | rec    | G2583_1532      | exoO        | CDS        |
| CB9615               | 1576379           | ns                | rec    | G2583_1532      | exoO        | CDS        |
| CB9615               | 1576384           | s                 | rec    | G2583_1532      | exoO        | CDS        |

| lineage <sup>a</sup> | site <sup>b</sup> | mutation          |        | gene       | Gene name | Type |
|----------------------|-------------------|-------------------|--------|------------|-----------|------|
|                      |                   | type <sup>c</sup> | recomb |            |           |      |
| CB9615               | 1576402           | s                 | rec    | G2583_1532 | exoO      | CDS  |
| CB9615               | 1576408           | s                 | rec    | G2583_1532 | exoO      | CDS  |
| CB9615               | 1576432           | s                 | rec    | G2583_1532 | exoO      | CDS  |
| CB9615               | 1576450           | s                 | rec    | G2583_1532 | exoO      | CDS  |
| CB9615               | 1576456           | s                 | rec    | G2583_1532 | exoO      | CDS  |
| CB9615               | 1576477           | s                 | rec    | G2583_1532 | exoO      | CDS  |
| CB9615               | 1576513           | s                 | rec    | G2583_1532 | exoO      | CDS  |
| CB9615               | 1576515           | s                 | rec    | G2583_1532 | exoO      | CDS  |
| CB9615               | 1576558           | s                 | rec    | G2583_1532 | exoO      | CDS  |
| CB9615               | 1576567           | s                 | rec    | G2583_1532 | exoO      | CDS  |
| CB9615               | 1576579           | s                 | rec    | G2583_1532 | exoO      | CDS  |
| CB9615               | 1576595           | ns                | rec    | G2583_1532 | exoO      | CDS  |
| CB9615               | 1576596           | ns                | rec    | G2583_1532 | exoO      | CDS  |
| CB9615               | 1576600           | s                 | rec    | G2583_1532 | exoO      | CDS  |
| CB9615               | 1576612           | s                 | rec    | G2583_1532 | exoO      | CDS  |
| CB9615               | 1576624           | ns                | rec    | G2583_1532 | exoO      | CDS  |
| CB9615               | 1576636           | s                 | rec    | G2583_1532 | exoO      | CDS  |
| CB9615               | 1576642           | s                 | rec    | G2583_1532 | exoO      | CDS  |
| CB9615               | 1576651           | s                 | rec    | G2583_1532 | exoO      | CDS  |
| CB9615               | 1576690           | s                 | rec    | G2583_1532 | exoO      | CDS  |
| CB9615               | 1576702           | s                 | rec    | G2583_1532 | exoO      | CDS  |
| CB9615               | 1576714           | s                 | rec    | G2583_1532 | exoO      | CDS  |
| CB9615               | 1576747           | s                 | rec    | G2583_1532 | exoO      | CDS  |
| CB9615               | 1576753           | ns                | rec    | G2583_1532 | exoO      | CDS  |
| CB9615               | 1576754           | ns                | rec    | G2583_1532 | exoO      | CDS  |
| CB9615               | 1576755           | ns                | rec    | G2583_1532 | exoO      | CDS  |
| CB9615               | 1576756           | ns                | rec    | G2583_1532 | exoO      | CDS  |
| CB9615               | 1576758           | ns                | rec    | G2583_1532 | exoO      | CDS  |
| CB9615               | 1576761           | ns                | rec    | G2583_1532 | exoO      | CDS  |
| CB9615               | 1576762           | s                 | rec    | G2583_1532 | exoO      | CDS  |
| CB9615               | 1576779           | ns                | rec    | G2583_1532 | exoO      | CDS  |
| CB9615               | 1576780           | ns                | rec    | G2583_1532 | exoO      | CDS  |
| CB9615               | 1576782           | ns                | rec    | G2583_1532 | exoO      | CDS  |
| CB9615               | 1576783           | ns                | rec    | G2583_1532 | exoO      | CDS  |
| CB9615               | 1576791           | ns                | rec    | G2583_1532 | exoO      | CDS  |
| CB9615               | 1576796           | ns                | rec    | G2583_1532 | exoO      | CDS  |
| CB9615               | 1576805           | ns                | rec    | G2583_1532 | exoO      | CDS  |
| CB9615               | 1576808           | ns                | rec    | G2583_1532 | exoO      | CDS  |
| CB9615               | 1576815           | ns                | rec    | G2583_1532 | exoO      | CDS  |
| CB9615               | 1576818           | ns                | rec    | G2583_1532 | exoO      | CDS  |
| CB9615               | 1576832           | ns                | rec    | G2583_1532 | exoO      | CDS  |
| CB9615               | 1576840           | ns                | rec    | G2583_1532 | exoO      | CDS  |
| CB9615               | 1576841           | ns                | rec    | G2583_1532 | exoO      | CDS  |
| CB9615               | 1576843           | s                 | rec    | G2583_1532 | exoO      | CDS  |
| CB9615               | 1576859           | ns                | rec    | G2583_1532 | exoO      | CDS  |

| lineage <sup>a</sup> | site <sup>b</sup> | mutation          |        | gene       | Gene name | Type       |
|----------------------|-------------------|-------------------|--------|------------|-----------|------------|
|                      |                   | type <sup>c</sup> | recomb |            |           |            |
| CB9615               | 1576876           | ns                | rec    | G2583_1532 | exoO      | CDS        |
| CB9615               | 1576877           | ns                | rec    | G2583_1532 | exoO      | CDS        |
| CB9615               | 1576883           | ns                | rec    | G2583_1532 | exoO      | CDS        |
| CB9615               | 1576887           | ns                | rec    | G2583_1532 | exoO      | CDS        |
| CB9615               | 1576888           | s                 | rec    | G2583_1532 | exoO      | CDS        |
| CB9615               | 1576911           | ns                | rec    | G2583_1532 | exoO      | CDS        |
| CB9615               | 1576925           | ns                | rec    | G2583_1532 | exoO      | CDS        |
| CB9615               | 1576926           | ns                | rec    | G2583_1532 | exoO      | CDS        |
| CB9615               | 1576932           | ns                | rec    | G2583_1532 | exoO      | CDS        |
| CB9615               | 1576946           | ns                | rec    | G2583_1532 | exoO      | CDS        |
| CB9615               | 1577036           | ns                | rec    | G2583_1532 | exoO      | CDS        |
| CB9615               | 1577037           | ns                | rec    | G2583_1532 | exoO      | CDS        |
| CB9615               | 1577050           | s                 | rec    | G2583_1532 | exoO      | CDS        |
| CB9615               | 1577056           | s                 | rec    | G2583_1532 | exoO      | CDS        |
| CB9615               | 1577062           | s                 | rec    | G2583_1532 | exoO      | CDS        |
| CB9615               | 1577087           | ns                | rec    | G2583_1532 | exoO      | CDS        |
| CB9615               | 1577088           | ns                | rec    | G2583_1532 | exoO      | CDS        |
| CB9615               | 1577091           | ns                | rec    | G2583_1532 | exoO      | CDS        |
| CB9615               | 1577460           | ns                |        | G2583_1532 | exoO      | CDS        |
| CB9615               | 1578358           | s                 |        | G2583_1532 | exoO      | CDS        |
| O157                 | 1761585           | s                 |        | G2583_1533 | ydfD      | CDS        |
| CB9615               | 1579211           | s                 |        | G2583_1534 | dicB      | CDS        |
| CB9615               | 1579236           | i                 |        | intergenic |           |            |
| CB9615               | 1579238           | i                 |        | intergenic |           |            |
| O157                 | 1763664           | del               |        | G2583_1539 | -         | CDS        |
| O55/O157             | 1581496           | s                 |        | G2583_1540 | dicA      | CDS        |
| O157                 | 1764356           | i                 |        | intergenic |           |            |
| O157                 | 1765092           | s                 |        | G2583_1542 | -         | CDS        |
| O157                 | 1765093           | ns                |        | G2583_1542 | -         | CDS        |
| O157                 | 1766676           | ns                |        | G2583_1545 | -         | CDS        |
| O157                 | 1769362           | ns                |        | G2583_1548 | gef       | CDS        |
| CB9615               | 1586959           | ins               |        | intergenic |           |            |
| O157                 | 1769693           | ns                |        | G2583_1549 | rem       | CDS        |
| O157                 | 1769754           | ns                |        | G2583_1549 | rem       | CDS        |
| CB9615               | 1587098           | ns                |        | G2583_1549 | rem       | CDS        |
| CB9615               | 1587102           | ns                |        | G2583_1549 | rem       | CDS        |
| O157                 | 1769827           | ns                |        | G2583_1549 | rem       | CDS        |
| CB9615               | 1587129           | ns                |        | G2583_1549 | rem       | CDS        |
| O55/O157             | 1587638           | ns                |        | G2583_1551 | -         | CDS        |
| EDL933               | 1862309           | ins               |        | G2583_1551 | -         | CDS        |
| O157                 | 1770409           | s                 |        | G2583_1551 | -         | CDS        |
| CB9615               | 1588294           | s                 |        | G2583_1551 | -         | CDS        |
| CB9615               | 1588339           | s                 |        | G2583_1551 | -         | CDS        |
| Sakai/EDL933         | 1796779           | nc                | rec    | ECs1806    | -         | pseudogene |
| Sakai/EDL933         | 1796785           | nc                | rec    | ECs1806    | -         | pseudogene |



| lineage <sup>a</sup> | site <sup>b</sup> | mutation          |        | gene    | Gene name | Type       |
|----------------------|-------------------|-------------------|--------|---------|-----------|------------|
|                      |                   | type <sup>c</sup> | recomb |         |           |            |
| Sakai/EDL933         | 1796787           | nc                | rec    | ECs1806 | -         | pseudogene |
| Sakai/EDL933         | 1796800           | nc                | rec    | ECs1806 | -         | pseudogene |
| Sakai/EDL933         | 1796821           | nc                | rec    | ECs1806 | -         | pseudogene |
| Sakai/EDL933         | 1796824           | nc                | rec    | ECs1806 | -         | pseudogene |
| Sakai/EDL933         | 1796825           | nc                | rec    | ECs1806 | -         | pseudogene |
| Sakai/EDL933         | 1796826           | nc                | rec    | ECs1806 | -         | pseudogene |
| Sakai/EDL933         | 1796827           | nc                | rec    | ECs1806 | -         | pseudogene |
| Sakai/EDL933         | 1796832           | nc                | rec    | ECs1806 | -         | pseudogene |
| Sakai/EDL933         | 1796839           | nc                | rec    | ECs1806 | -         | pseudogene |
| Sakai/EDL933         | 1796842           | nc                | rec    | ECs1806 | -         | pseudogene |
| Sakai/EDL933         | 1796875           | nc                | rec    | ECs1806 | -         | pseudogene |
| Sakai/EDL933         | 1796883           | nc                | rec    | ECs1806 | -         | pseudogene |
| Sakai/EDL933         | 1796891           | nc                | rec    | ECs1806 | -         | pseudogene |
| Sakai/EDL933         | 1796893           | nc                | rec    | ECs1806 | -         | pseudogene |
| Sakai/EDL933         | 1796915           | nc                | rec    | ECs1806 | -         | pseudogene |
| Sakai/EDL933         | 1796926           | nc                | rec    | ECs1806 | -         | pseudogene |
| Sakai/EDL933         | 1796933           | nc                | rec    | ECs1806 | -         | pseudogene |
| Sakai/EDL933         | 1796937           | nc                | rec    | ECs1806 | -         | pseudogene |
| Sakai/EDL933         | 1796953           | nc                | rec    | ECs1806 | -         | pseudogene |
| Sakai/EDL933         | 1796989           | nc                | rec    | ECs1806 | -         | pseudogene |
| Sakai/EDL933         | 1797010           | nc                | rec    | ECs1806 | -         | pseudogene |
| Sakai/EDL933         | 1797013           | nc                | rec    | ECs1806 | -         | pseudogene |
| Sakai/EDL933         | 1797031           | nc                | rec    | ECs1806 | -         | pseudogene |
| Sakai/EDL933         | 1797043           | nc                | rec    | ECs1806 | -         | pseudogene |
| Sakai/EDL933         | 1797046           | nc                | rec    | ECs1806 | -         | pseudogene |
| Sakai/EDL933         | 1797048           | nc                | rec    | ECs1806 | -         | pseudogene |
| Sakai/EDL933         | 1797050           | nc                | rec    | ECs1806 | -         | pseudogene |
| Sakai/EDL933         | 1797055           | nc                | rec    | ECs1806 | -         | pseudogene |
| Sakai/EDL933         | 1797064           | nc                | rec    | ECs1806 | -         | pseudogene |
| Sakai/EDL933         | 1797065           | nc                | rec    | ECs1806 | -         | pseudogene |
| Sakai/EDL933         | 1797066           | nc                | rec    | ECs1806 | -         | pseudogene |
| Sakai/EDL933         | 1797067           | nc                | rec    | ECs1806 | -         | pseudogene |
| Sakai/EDL933         | 1797070           | nc                | rec    | ECs1806 | -         | pseudogene |
| Sakai/EDL933         | 1797073           | nc                | rec    | ECs1806 | -         | pseudogene |
| Sakai/EDL933         | 1797094           | nc                | rec    | ECs1806 | -         | pseudogene |
| Sakai/EDL933         | 1797097           | nc                | rec    | ECs1806 | -         | pseudogene |
| Sakai/EDL933         | 1797106           | nc                | rec    | ECs1806 | -         | pseudogene |
| Sakai/EDL933         | 1797115           | nc                | rec    | ECs1806 | -         | pseudogene |
| Sakai/EDL933         | 1797122           | nc                | rec    | ECs1806 | -         | pseudogene |
| Sakai/EDL933         | 1797130           | nc                | rec    | ECs1806 | -         | pseudogene |
| Sakai/EDL933         | 1797157           | nc                | rec    | ECs1806 | -         | pseudogene |
| Sakai/EDL933         | 1797166           | nc                | rec    | ECs1806 | -         | pseudogene |
| Sakai/EDL933         | 1797175           | nc                | rec    | ECs1806 | -         | pseudogene |
| Sakai/EDL933         | 1797184           | nc                | rec    | ECs1806 | -         | pseudogene |
| Sakai/EDL933         | 1797188           | nc                | rec    | ECs1806 | -         | pseudogene |

| lineage <sup>a</sup> | site <sup>b</sup> | mutation          |        | gene       | Gene name | Type       |
|----------------------|-------------------|-------------------|--------|------------|-----------|------------|
|                      |                   | type <sup>c</sup> | recomb |            |           |            |
| Sakai/EDL933         | 1797196           | nc                | rec    | ECs1806    | -         | pseudogene |
| Sakai/EDL933         | 1797223           | nc                | rec    | ECs1806    | -         | pseudogene |
| Sakai/EDL933         | 1797233           | nc                | rec    | ECs1806    | -         | pseudogene |
| Sakai/EDL933         | 1797235           | nc                | rec    | ECs1806    | -         | pseudogene |
| Sakai/EDL933         | 1797244           | nc                | rec    | ECs1806    | -         | pseudogene |
| Sakai/EDL933         | 1797247           | nc                | rec    | ECs1806    | -         | pseudogene |
| Sakai/EDL933         | 1797265           | nc                | rec    | ECs1806    | -         | pseudogene |
| Sakai/EDL933         | 1797307           | nc                | rec    | ECs1806    | -         | pseudogene |
| Sakai/EDL933         | 1797313           | nc                | rec    | ECs1806    | -         | pseudogene |
| Sakai/EDL933         | 1797373           | nc                | rec    | ECs1806    | -         | pseudogene |
| Sakai/EDL933         | 1797376           | nc                | rec    | ECs1806    | -         | pseudogene |
| Sakai/EDL933         | 1797377           | nc                | rec    | ECs1806    | -         | pseudogene |
| Sakai/EDL933         | 1797379           | nc                | rec    | ECs1806    | -         | pseudogene |
| Sakai/EDL933         | 1797381           | nc                | rec    | ECs1806    | -         | pseudogene |
| Sakai/EDL933         | 1797382           | nc                | rec    | ECs1806    | -         | pseudogene |
| Sakai/EDL933         | 1797385           | nc                | rec    | ECs1806    | -         | pseudogene |
| EDL933               | 2289690           | nc                |        | ECs1806    | -         | pseudogene |
| Sakai                | 1809380           | s                 |        | ECs1820    | -         | CDS        |
| CB9615               | 1628142           | ns                |        | G2583_1596 | yciE      | CDS        |
| O157                 | 1816270           | i                 |        | intergenic |           |            |
| O157                 | 1817110           | i                 |        | intergenic |           |            |
| O157                 | 1817628           | s                 |        | G2583_1599 | trpA      | CDS        |
| CB9615               | 1630095           | ns                |        | G2583_1599 | trpA      | CDS        |
| O157                 | 1818104           | ns                |        | G2583_1599 | trpA      | CDS        |
| EDL933               | 2264476           | ins               |        | G2583_1603 | trpE      | CDS        |
| O157                 | 1823642           | ns                |        | G2583_1603 | trpE      | CDS        |
| CB9615               | 1635957           | ns                |        | G2583_1603 | trpE      | CDS        |
| O157                 | 1824156           | i                 |        | intergenic |           |            |
| O157                 | 1824237           | i                 |        | intergenic |           |            |
| O157                 | 1825597           | s                 |        | G2583_1606 | yciO      | CDS        |
| CB9615               | 1638617           | ns                |        | G2583_1607 | -         | CDS        |
| O157                 | 1829004           | ns                |        | G2583_1609 | btuR      | CDS        |
| O157                 | 1830902           | s                 |        | G2583_1611 | sohB      | CDS        |
| CB9615               | 1646614           | i                 |        | intergenic |           |            |
| O157                 | 1834948           | s                 |        | G2583_1614 | cysB      | CDS        |
| O157                 | 1835167           | s                 |        | G2583_1614 | cysB      | CDS        |
| CB9615               | 1648691           | s                 |        | G2583_1617 | acnA      | CDS        |
| EDL933               | 2247204           | ins               |        | intergenic |           |            |
| O157                 | 1840051           | s                 |        | G2583_1619 | pgpB      | CDS        |
| CB9615               | 1655198           | ns                |        | G2583_1622 | pyrF      | CDS        |
| EDL933               | 2242049           | ins               |        | intergenic |           |            |
| O157                 | 1845248           | ns                |        | G2583_1626 | yciZ      | CDS        |
| O55/O157             | 1658246           | s                 |        | G2583_1627 | gmr       | CDS        |
| O157                 | 1846543           | s                 |        | G2583_1627 | gmr       | CDS        |
| O157                 | 1846588           | s                 |        | G2583_1627 | gmr       | CDS        |

| lineage <sup>a</sup> | site <sup>b</sup> | mutation          |        | gene       | Gene name | Type       |
|----------------------|-------------------|-------------------|--------|------------|-----------|------------|
|                      |                   | type <sup>c</sup> | recomb |            |           |            |
| CB9615               | 1660014           | ns                |        | G2583_1628 | rnb       | CDS        |
| O157                 | 1849924           | ns                |        | G2583_1629 | yciW      | CDS        |
| EDL933               | 2236241           | ins               |        | intergenic |           |            |
| O157                 | 1854374           | del-6             |        | G2583_1634 | acrB      | CDS        |
| O157                 | 1855245           | s                 |        | G2583_1634 | acrB      | CDS        |
| CB9615               | 1667461           | s                 |        | G2583_1634 | acrB      | CDS        |
| CB9615               | 1668269           | ns                |        | G2583_1634 | acrB      | CDS        |
| O157                 | 1857017           | ns                |        | G2583_1634 | acrB      | CDS        |
| O157                 | 1857124           | ns                |        | G2583_1634 | acrB      | CDS        |
| CB9615               | 1669577           | s                 |        | G2583_1635 | eefC      | CDS        |
| EDL933               | 2228993           | ins               |        | G2583_1635 | eefC      | CDS        |
| EDL933               | 2227971           | ins               |        | G2583_1636 | eefD      | CDS        |
| CB9615               | 1674365           | s                 |        | G2583_1639 | sapC      | CDS        |
| O157                 | 1863935           | ns                |        | G2583_1641 | sapA      | CDS        |
| CB9615               | 1676620           | ns                |        | G2583_1641 | sapA      | CDS        |
| CB9615               | 1677185           | i                 |        | intergenic |           |            |
| EDL933               | 2222023           | ins               |        | intergenic |           |            |
| EDL933               | 2221451           | ins               |        | intergenic |           |            |
| O157                 | 1867323           | i                 |        | intergenic |           |            |
| CB9615               | 1681028           | i                 |        | intergenic |           |            |
| O157                 | 1869052           | ns                |        | G2583_1645 | puuD      | CDS        |
| O157                 | 1869324           | ns                |        | G2583_1645 | puuD      | CDS        |
| O157                 | 1869679           | s                 |        | G2583_1645 | puuD      | CDS        |
| O157                 | 1872868           | ns                |        | G2583_1648 | puuB      | CDS        |
| O55/O157             | 1686425           | s                 |        | G2583_1649 | puuE      | CDS        |
| CB9615               | 1689339           | ns                |        | G2583_1654 | pspD      | CDS        |
| EDL933               | 2209244           | ins               |        | intergenic |           |            |
| CB9615               | 1690852           | nc                |        | G2583_1656 | ycjM      | pseudogene |
| CB9615               | 1691023           | nc                |        | G2583_1656 | ycjM      | pseudogene |
| O157                 | 1879802           | ns                |        | G2583_1657 | ycjN      | CDS        |
| O157                 | 1880351           | ns                |        | G2583_1657 | ycjN      | CDS        |
| O157                 | 1880878           | ns                |        | G2583_1657 | ycjN      | CDS        |
| CB9615               | 1693449           | ns                |        | G2583_1658 | ycjO      | CDS        |
| CB9615               | 1693893           | ns                |        | G2583_1658 | ycjO      | CDS        |
| O157                 | 1881947           | ns                |        | G2583_1659 | ycjP      | CDS        |
| O157                 | 1882879           | s                 |        | G2583_1660 | ycjQ      | CDS        |
| O157                 | 1883983           | ns                |        | G2583_1661 | ycjR      | CDS        |
| O157                 | 1884344           | ns                |        | G2583_1661 | ycjR      | CDS        |
| CB9615               | 1697890           | ns                |        | G2583_1663 | ycjT      | CDS        |
| CB9615               | 1701972           | ns                |        | G2583_1666 | ompG      | CDS        |
| EDL933               | 2196477           | ins               |        | intergenic |           |            |
| CB9615               | 1703127           | ns                |        | G2583_1667 | ycjW      | CDS        |
| CB9615               | 1704503           | s                 |        | G2583_1668 | ycjX      | CDS        |
| CB9615               | 1709284           | ns                |        | G2583_1672 | ycjG      | CDS        |
| O157                 | 1897288           | ns                |        | G2583_1672 | ycjG      | CDS        |

| lineage <sup>a</sup> | site <sup>b</sup> | mutation          |        | gene       | Gene name | Type |
|----------------------|-------------------|-------------------|--------|------------|-----------|------|
|                      |                   | type <sup>c</sup> | recomb |            |           |      |
| CB9615               | 1712035           | ins-2             |        | G2583_1675 | -         | CDS  |
| EDL933               | 2184672           | ins               |        | intergenic |           |      |
| O157                 | 1914551           | s                 |        | G2583_1687 | abgR      | CDS  |
| O157                 | 1916392           | s                 |        | G2583_1690 | ydaM      | CDS  |
| O55/O157             | 1732193           | ns                | rec    | G2583_1694 | ttcA      | CDS  |
| O55/O157             | 1732251           | s                 | rec    | G2583_1695 | intR      | CDS  |
| O55/O157             | 1732350           | s                 | rec    | G2583_1695 | intR      | CDS  |
| O55/O157             | 1732365           | s                 | rec    | G2583_1695 | intR      | CDS  |
| O55/O157             | 1732467           | s                 | rec    | G2583_1695 | intR      | CDS  |
| O55/O157             | 1732470           | s                 | rec    | G2583_1695 | intR      | CDS  |
| O55/O157             | 1732473           | s                 | rec    | G2583_1695 | intR      | CDS  |
| O55/O157             | 1732503           | s                 | rec    | G2583_1695 | intR      | CDS  |
| O55/O157             | 1732521           | s                 | rec    | G2583_1695 | intR      | CDS  |
| O55/O157             | 1732584           | s                 | rec    | G2583_1695 | intR      | CDS  |
| O157                 | 1923856           | s                 |        | G2583_1699 | recT      | CDS  |
| O157                 | 1923899           | s                 |        | G2583_1699 | recT      | CDS  |
| CB9615               | 1735969           | ns                | rec    | G2583_1700 | recE      | CDS  |
| CB9615               | 1735991           | ns                | rec    | G2583_1700 | recE      | CDS  |
| CB9615               | 1736000           | ns                | rec    | G2583_1700 | recE      | CDS  |
| CB9615               | 1736038           | s                 | rec    | G2583_1700 | recE      | CDS  |
| CB9615               | 1736044           | s                 | rec    | G2583_1700 | recE      | CDS  |
| CB9615               | 1736056           | ns                | rec    | G2583_1700 | recE      | CDS  |
| CB9615               | 1736057           | ns                | rec    | G2583_1700 | recE      | CDS  |
| CB9615               | 1736059           | s                 | rec    | G2583_1700 | recE      | CDS  |
| CB9615               | 1736062           | s                 | rec    | G2583_1700 | recE      | CDS  |
| CB9615               | 1736065           | ns                | rec    | G2583_1700 | recE      | CDS  |
| CB9615               | 1736066           | ns                | rec    | G2583_1700 | recE      | CDS  |
| CB9615               | 1736071           | s                 | rec    | G2583_1700 | recE      | CDS  |
| CB9615               | 1736080           | ns                | rec    | G2583_1700 | recE      | CDS  |
| CB9615               | 1736081           | ns                | rec    | G2583_1700 | recE      | CDS  |
| CB9615               | 1736087           | ns                | rec    | G2583_1700 | recE      | CDS  |
| CB9615               | 1736090           | ns                | rec    | G2583_1700 | recE      | CDS  |
| CB9615               | 1736108           | ns                | rec    | G2583_1700 | recE      | CDS  |
| EDL933               | 2157772           | ins               |        | ECs1941    | -         | CDS  |
| EDL933               | 2157723           | ns                |        | ECs1941    | -         | CDS  |
| EDL933               | 2155153           | ns                |        | ECs1946    | -         | CDS  |
| EDL933               | 2146918           | ins               |        | ECs1958    | -         | CDS  |
| EDL933               | 2145293           | i                 | rec    | intergenic |           |      |
| EDL933               | 2145291           | i                 | rec    | intergenic |           |      |
| EDL933               | 2145289           | ins               | rec    | intergenic |           |      |
| EDL933               | 2145284           | i                 | rec    | intergenic |           |      |
| EDL933               | 2145158           | ns                | rec    | ECs1961    | -         | CDS  |
| EDL933               | 2144616           | ns                | rec    | ECs1961    | -         | CDS  |
| EDL933               | 2144405           | ns                | rec    | ECs1961    | -         | CDS  |
| EDL933               | 2144352           | ns                | rec    | ECs1961    | -         | CDS  |

| lineage <sup>a</sup> | site <sup>b</sup> | mutation          |        | gene       | Gene name | Type |
|----------------------|-------------------|-------------------|--------|------------|-----------|------|
|                      |                   | type <sup>c</sup> | recomb |            |           |      |
| EDL933               | 2144286           | ns                | rec    | ECs1961    | -         | CDS  |
| EDL933               | 2144051           | ns                | rec    | ECs1961    | -         | CDS  |
| EDL933               | 2144013           | ns                | rec    | ECs1961    | -         | CDS  |
| EDL933               | 2143825           | ns                | rec    | ECs1961    | -         | CDS  |
| EDL933               | 2143747           | ns                | rec    | ECs1961    | -         | CDS  |
| EDL933               | 2143614           | ns                | rec    | ECs1961    | -         | CDS  |
| EDL933               | 2143593           | ns                | rec    | ECs1961    | -         | CDS  |
| EDL933               | 2143483           | ns                | rec    | ECs1961    | -         | CDS  |
| EDL933               | 2143346           | ns                | rec    | ECs1961    | -         | CDS  |
| EDL933               | 2143322           | ns                | rec    | ECs1961    | -         | CDS  |
| EDL933               | 2143318           | ns                | rec    | ECs1961    | -         | CDS  |
| EDL933               | 2120440           | ns                | rec    | ECs1991    | -         | CDS  |
| EDL933               | 2120419           | ns                | rec    | ECs1991    | -         | CDS  |
| EDL933               | 2120401           | ns                | rec    | ECs1991    | -         | CDS  |
| EDL933               | 2120362           | ns                | rec    | ECs1991    | -         | CDS  |
| EDL933               | 2120333           | ns                | rec    | ECs1991    | -         | CDS  |
| EDL933               | 2120290           | ns                | rec    | ECs1991    | -         | CDS  |
| EDL933               | 2120233           | ns                | rec    | ECs1991    | -         | CDS  |
| EDL933               | 2120210           | ns                | rec    | ECs1991    | -         | CDS  |
| EDL933               | 2120146           | ns                | rec    | ECs1991    | -         | CDS  |
| EDL933               | 2120128           | ns                | rec    | ECs1991    | -         | CDS  |
| EDL933               | 2120122           | ns                | rec    | ECs1991    | -         | CDS  |
| EDL933               | 2119968           | i                 | rec    | intergenic |           |      |
| EDL933               | 2119966           | i                 | rec    | intergenic |           |      |
| EDL933               | 2119961           | i                 | rec    | intergenic |           |      |
| EDL933               | 2119960           | i                 | rec    | intergenic |           |      |
| EDL933               | 2119872           | i                 | rec    | intergenic |           |      |
| EDL933               | 2119854           | i                 | rec    | intergenic |           |      |
| EDL933               | 2119803           | ns                | rec    | ECs1992    | -         | CDS  |
| EDL933               | 2119800           | ns                | rec    | ECs1992    | -         | CDS  |
| EDL933               | 2119617           | ns                | rec    | ECs1992    | -         | CDS  |
| EDL933               | 2119530           | ns                | rec    | ECs1992    | -         | CDS  |
| EDL933               | 2119377           | ns                | rec    | ECs1992    | -         | CDS  |
| CB9615               | 1773669           | s                 | rec    | G2583_1747 | -         | CDS  |
| CB9615               | 1773693           | s                 | rec    | G2583_1747 | -         | CDS  |
| CB9615               | 1773699           | s                 | rec    | G2583_1747 | -         | CDS  |
| CB9615               | 1773702           | s                 | rec    | G2583_1747 | -         | CDS  |
| CB9615               | 1773705           | s                 | rec    | G2583_1747 | -         | CDS  |
| CB9615               | 1773742           | ns                | rec    | G2583_1747 | -         | CDS  |
| O157                 | 1969616           | ns                |        | G2583_1747 | -         | CDS  |
| O157                 | 1969701           | s                 |        | G2583_1747 | -         | CDS  |
| O157                 | 1969949           | i                 |        | intergenic |           |      |
| CB9615               | 1774764           | ns                |        | G2583_1748 | -         | CDS  |
| CB9615               | 1774765           | ns                |        | G2583_1748 | -         | CDS  |
| O55/O157             | 1775389           | ns                |        | G2583_1749 | -         | CDS  |

| lineage <sup>a</sup> | site <sup>b</sup> | mutation          |        | gene       | Gene name | Type |
|----------------------|-------------------|-------------------|--------|------------|-----------|------|
|                      |                   | type <sup>c</sup> | recomb |            |           |      |
| O55/O157             | 1775484           | ns                |        | G2583_1749 | -         | CDS  |
| O55/O157             | 1775603           | i                 |        | intergenic |           |      |
| O55/O157             | 1776128           | s                 |        | G2583_1750 | -         | CDS  |
| O55/O157             | 1776310           | i                 |        | intergenic |           |      |
| O55/O157             | 1776395           | i                 | rec    | intergenic |           |      |
| O55/O157             | 1776397           | i                 | rec    | intergenic |           |      |
| O55/O157             | 1776406           | i                 | rec    | intergenic |           |      |
| O55/O157             | 1776411           | i                 | rec    | intergenic |           |      |
| O55/O157             | 1776413           | i                 | rec    | intergenic |           |      |
| O55/O157             | 1776417           | indel             | rec    | intergenic |           |      |
| O55/O157             | 1776427           | i                 | rec    | intergenic |           |      |
| O55/O157             | 1776433           | i                 | rec    | intergenic |           |      |
| O55/O157             | 1776434           | i                 | rec    | intergenic |           |      |
| O55/O157             | 1776435           | i                 | rec    | intergenic |           |      |
| O55/O157             | 1776831           | indel-13          |        | intergenic |           |      |
| O157                 | 1975875           | s                 |        | G2583_1754 | ydbK      | CDS  |
| O157                 | 1976735           | ns                |        | G2583_1754 | ydbK      | CDS  |
| EDL933               | 2109214           | ins               |        | intergenic |           |      |
| EDL933               | 2108013           | ins               |        | intergenic |           |      |
| CB9615               | 1787006           | s                 |        | G2583_1758 | ydbH      | CDS  |
| CB9615               | 1788160           | ns                |        | G2583_1760 | ydbL      | CDS  |
| O55/O157             | 1983970           | indel             |        | intergenic |           |      |
| O55/O157             | 1789062           | s                 |        | G2583_1762 | -         | CDS  |
| EDL933               | 2103929           | ins               |        | G2583_1762 | -         | CDS  |
| O55/O157             | 1789102           | ns                |        | G2583_1762 | -         | CDS  |
| O55/O157             | 1789131           | s                 |        | G2583_1762 | -         | CDS  |
| O55/O157             | 1789483           | ns                |        | G2583_1762 | -         | CDS  |
| O55/O157             | 1790383           | ns                |        | G2583_1762 | -         | CDS  |
| O55/O157             | 1791108           | s                 |        | G2583_1762 | -         | CDS  |
| Sakai                | 1987879           | ns                |        | G2583_1763 | entS      | CDS  |
| O55/O157             | 1792369           | ns                |        | G2583_1763 | entS      | CDS  |
| O157                 | 1990992           | ns                |        | G2583_1765 | ydbD      | CDS  |
| CB9615               | 1796309           | ns                |        | G2583_1765 | ydbD      | CDS  |
| CB9615               | 1796758           | s                 |        | G2583_1765 | ydbD      | CDS  |
| CB9615               | 1797653           | ns                |        | G2583_1765 | ydbD      | CDS  |
| CB9615               | 1798123           | ns                |        | G2583_1766 | ynbA      | CDS  |
| O157                 | 1997244           | ns                |        | G2583_1769 | ynbD      | CDS  |
| CB9615               | 1802230           | ns                |        | G2583_1769 | ynbD      | CDS  |
| O157                 | 1998914           | s                 |        | G2583_1771 | hrpA      | CDS  |
| O157                 | 1999181           | s                 |        | G2583_1771 | hrpA      | CDS  |
| O157                 | 2001300           | ns                |        | G2583_1771 | hrpA      | CDS  |
| O157                 | 2004345           | s                 |        | G2583_1775 | -         | CDS  |
| O157                 | 2004346           | ns                |        | G2583_1775 | -         | CDS  |
| O157                 | 2005705           | i                 |        | intergenic |           |      |
| CB9615               | 1812976           | ns                |        | G2583_1779 | cybB      | CDS  |

| lineage <sup>a</sup> | site <sup>b</sup> | mutation          |        | gene       | Gene name | Type       |
|----------------------|-------------------|-------------------|--------|------------|-----------|------------|
|                      |                   | type <sup>c</sup> | recomb |            |           |            |
| CB9615               | 1813669           | ns                |        | G2583_1781 | ydcA      | CDS        |
| O157                 | 2009219           | ns                |        | G2583_1781 | ydcA      | CDS        |
| EDL933               | 2075503           | ins               |        | G2583_1785 | ydcJ      | CDS        |
| EDL933               | 2074922           | ins               |        | G2583_1785 | ydcJ      | CDS        |
| EDL933               | 2074322           | ins               |        | intergenic |           |            |
| O157                 | 2016281           | ns                |        | G2583_1788 | ydcH      | CDS        |
| CB9615               | 1820817           | ns                |        | G2583_1788 | ydcH      | CDS        |
| O157                 | 2016743           | ns                |        | G2583_1789 | rimL      | CDS        |
| CB9615               | 1821814           | s                 |        | G2583_1790 | ydcK      | CDS        |
| EDL933               | 2068776           | ins               |        | intergenic |           |            |
| EDL933               | 2068689           | ins               |        | intergenic |           |            |
| CB9615               | 1825601           | ns                |        | G2583_1794 | ydcO      | CDS        |
| O157                 | 2023761           | s                 |        | G2583_1796 | ydcP      | CDS        |
| O157                 | 2025633           | s                 |        | G2583_1799 | ydcQ      | CDS        |
| CB9615               | 1833726           | ns                |        | G2583_1802 | ydcT      | CDS        |
| O157                 | 2030050           | ns                |        | G2583_1803 | ydcU      | CDS        |
| CB9615               | 1835749           | del-8             |        | G2583_1804 | ydcV      | CDS        |
| O157                 | 2032185           | ns                |        | G2583_1805 | ydcW      | CDS        |
| O157                 | 2033176           | ns                |        | G2583_1806 | ydcX      | CDS        |
| O157                 | 2034031           | ns                |        | G2583_1808 | ydcZ      | CDS        |
| CB9615               | 1844594           | i                 |        | intergenic |           |            |
| CB9615               | 1845392           | s                 |        | G2583_1814 | ansP      | CDS        |
| Sakai                | 2041566           | s                 |        | G2583_1814 | ansP      | CDS        |
| O157                 | 2041968           | i                 |        | intergenic |           |            |
| CB9615               | 1847799           | ns                |        | G2583_1817 | -         | CDS        |
| O157                 | 2044028           | s                 |        | G2583_1818 | vgrE      | CDS        |
| O157                 | 2045155           | ns                |        | G2583_1818 | vgrE      | CDS        |
| EDL933               | 2042310           | nc                | rec    | G2583_1819 | -         | pseudogene |
| Sakai                | 2046254           | nc                |        | G2583_1819 | -         | pseudogene |
| EDL933               | 2042207           | nc                | rec    | G2583_1819 | -         | pseudogene |
| EDL933               | 2042172           | nc                | rec    | G2583_1819 | -         | pseudogene |
| EDL933               | 2042135           | nc                | rec    | G2583_1819 | -         | pseudogene |
| EDL933               | 2042093           | nc                | rec    | G2583_1819 | -         | pseudogene |
| EDL933               | 2042092           | nc                | rec    | G2583_1819 | -         | pseudogene |
| EDL933               | 2042091           | del-2             | rec    | G2583_1819 | -         | pseudogene |
| EDL933               | 2042088           | nc                | rec    | G2583_1819 | -         | pseudogene |
| EDL933               | 2042086           | nc                | rec    | G2583_1819 | -         | pseudogene |
| EDL933               | 2042082           | nc                | rec    | G2583_1819 | -         | pseudogene |
| EDL933               | 2042081           | nc                | rec    | G2583_1819 | -         | pseudogene |
| EDL933               | 2042076           | nc                | rec    | G2583_1819 | -         | pseudogene |
| EDL933               | 2042074           | ins               | rec    | G2583_1819 | -         | pseudogene |
| EDL933               | 2042016           | ins               | rec    | G2583_1819 | -         | pseudogene |
| EDL933               | 2042003           | ins               | rec    | G2583_1819 | -         | pseudogene |
| EDL933               | 2041991           | ins               | rec    | G2583_1819 | -         | pseudogene |
| EDL933               | 2041987           | ins               | rec    | G2583_1819 | -         | pseudogene |

| lineage <sup>a</sup> | site <sup>b</sup> | mutation          |        | gene       | Gene name | Type       |
|----------------------|-------------------|-------------------|--------|------------|-----------|------------|
|                      |                   | type <sup>c</sup> | recomb |            |           |            |
| EDL933               | 2041979           | nc                | rec    | G2583_1819 | -         | pseudogene |
| EDL933               | 2041977           | ins               | rec    | G2583_1819 | -         | pseudogene |
| EDL933               | 2041953           | nc                | rec    | G2583_1819 | -         | pseudogene |
| EDL933               | 2041944           | nc                | rec    | G2583_1819 | -         | pseudogene |
| EDL933               | 2041924           | nc                | rec    | G2583_1819 | -         | pseudogene |
| EDL933               | 2041886           | nc                | rec    | G2583_1819 | -         | pseudogene |
| EDL933               | 2041866           | nc                | rec    | G2583_1819 | -         | pseudogene |
| EDL933               | 2041843           | nc                | rec    | G2583_1819 | -         | pseudogene |
| EDL933               | 2041831           | nc                | rec    | G2583_1819 | -         | pseudogene |
| EDL933               | 2041830           | nc                | rec    | G2583_1819 | -         | pseudogene |
| EDL933               | 2041827           | nc                | rec    | G2583_1819 | -         | pseudogene |
| O55/O157             | 1851307           | nc                | rec    | G2583_1819 | -         | pseudogene |
| O55/O157             | 1851318           | nc                | rec    | G2583_1819 | -         | pseudogene |
| O55/O157             | 1851330           | nc                | rec    | G2583_1819 | -         | pseudogene |
| O55/O157             | 1851421           | nc                | rec    | G2583_1819 | -         | pseudogene |
| O55/O157             | 1851438           | nc                | rec    | G2583_1819 | -         | pseudogene |
| O55/O157             | 1851448           | nc                | rec    | G2583_1819 | -         | pseudogene |
| O55/O157             | 1851485           | nc                | rec    | G2583_1819 | -         | pseudogene |
| O55/O157             | 1851487           | nc                | rec    | G2583_1819 | -         | pseudogene |
| O55/O157             | 1851505           | nc                | rec    | G2583_1819 | -         | pseudogene |
| O55/O157             | 1851688           | nc                | rec    | G2583_1819 | -         | pseudogene |
| O55/O157             | 1851727           | nc                | rec    | G2583_1819 | -         | pseudogene |
| O55/O157             | 1851742           | nc                | rec    | G2583_1819 | -         | pseudogene |
| O55/O157             | 1851943           | nc                | rec    | G2583_1819 | -         | pseudogene |
| O55/O157             | 1851952           | nc                | rec    | G2583_1819 | -         | pseudogene |
| O55/O157             | 1852006           | nc                | rec    | G2583_1819 | -         | pseudogene |
| O55/O157             | 1852048           | nc                | rec    | G2583_1819 | -         | pseudogene |
| O55/O157             | 1852066           | nc                | rec    | G2583_1819 | -         | pseudogene |
| O55/O157             | 1852069           | nc                | rec    | G2583_1819 | -         | pseudogene |
| O55/O157             | 1852070           | nc                | rec    | G2583_1819 | -         | pseudogene |
| O55/O157             | 1852090           | nc                | rec    | G2583_1819 | -         | pseudogene |
| O55/O157             | 1852099           | nc                | rec    | G2583_1819 | -         | pseudogene |
| O55/O157             | 1852107           | nc                | rec    | G2583_1819 | -         | pseudogene |
| O55/O157             | 1852140           | nc                | rec    | G2583_1819 | -         | pseudogene |
| O55/O157             | 1852216           | nc                | rec    | G2583_1819 | -         | pseudogene |
| O55/O157             | 1852261           | nc                | rec    | G2583_1819 | -         | pseudogene |
| O55/O157             | 1852303           | nc                | rec    | G2583_1819 | -         | pseudogene |
| O55/O157             | 1852306           | nc                | rec    | G2583_1819 | -         | pseudogene |
| O55/O157             | 1852312           | nc                | rec    | G2583_1819 | -         | pseudogene |
| EDL933               | 2040519           | del-3             |        | G2583_1819 | -         | pseudogene |
| EDL933               | 2040449           | del               |        | G2583_1819 | -         | pseudogene |
| EDL933               | 2040435           | nc                |        | G2583_1819 | -         | pseudogene |
| EDL933               | 2040428           | del               |        | G2583_1819 | -         | pseudogene |
| EDL933               | 2040426           | nc                |        | G2583_1819 | -         | pseudogene |
| EDL933               | 2040423           | del               |        | G2583_1819 | -         | pseudogene |



| lineage <sup>a</sup> | site <sup>b</sup> | mutation          |        | gene       | Gene name | Type       |
|----------------------|-------------------|-------------------|--------|------------|-----------|------------|
|                      |                   | type <sup>c</sup> | recomb |            |           |            |
| EDL933               | 2040419           | del               |        | G2583_1819 | -         | pseudogene |
| EDL933               | 2040403           | ins               |        | G2583_1819 | -         | pseudogene |
| EDL933               | 2040391           | ins               |        | G2583_1819 | -         | pseudogene |
| EDL933               | 2040378           | ins               |        | G2583_1819 | -         | pseudogene |
| O157                 | 2048579           | nc                |        | G2583_1819 | -         | pseudogene |
| O157                 | 2049629           | nc                |        | G2583_1819 | -         | pseudogene |
| Sakai                | 2049909           | nc                |        | G2583_1819 | -         | pseudogene |
| Sakai                | 2049911           | nc                |        | G2583_1819 | -         | pseudogene |
| Sakai                | 2049912           | nc                |        | G2583_1819 | -         | pseudogene |
| O157                 | 2050790           | i                 |        | intergenic |           |            |
| O157                 | 2051703           | nc                |        | G2583_1822 | ydcC      | pseudogene |
| CB9615               | 1856299           | nc                |        | G2583_1822 | ydcC      | pseudogene |
| O157                 | 2051940           | del               |        | G2583_1822 | ydcC      | pseudogene |
| CB9615               | 1856776           | ns                |        | G2583_1823 | pptA      | CDS        |
| O157                 | 2052966           | ns                |        | G2583_1824 | yddH      | CDS        |
| O157                 | 2053926           | del               |        | G2583_1825 | nhoA      | CDS        |
| CB9615               | 1861732           | s                 |        | G2583_1829 | narY      | CDS        |
| O157                 | 2058259           | ns                |        | G2583_1830 | narZ      | CDS        |
| CB9615               | 1863921           | s                 |        | G2583_1830 | narZ      | CDS        |
| O157                 | 2060459           | s                 |        | G2583_1830 | narZ      | CDS        |
| O157                 | 2062153           | ns                |        | G2583_1831 | narU      | CDS        |
| O157                 | 2064500           | ns                |        | G2583_1832 | yddJ      | CDS        |
| CB9615               | 1870552           | ns                |        | G2583_1834 | -         | CDS        |
| CB9615               | 1870598           | ns                |        | G2583_1834 | -         | CDS        |
| CB9615               | 1870717           | i                 |        | intergenic |           |            |
| CB9615               | 1871038           | ns                |        | G2583_1835 | -         | CDS        |
| O157                 | 2067489           | i                 |        | intergenic |           |            |
| O157                 | 2067510           | i                 |        | intergenic |           |            |
| CB9615               | 1871991           | i                 |        | intergenic |           |            |
| O157                 | 2067605           | i                 |        | intergenic |           |            |
| O157                 | 2069089           | nc                |        | G2583_1837 | fdnG      | pseudogene |
| CB9615               | 1874145           | nc                |        | G2583_1837 | fdnG      | pseudogene |
| O157                 | 2071783           | nc                |        | G2583_1837 | fdnG      | pseudogene |
| Sakai                | 2074660           | ns                |        | G2583_1841 | adhP      | CDS        |
| CB9615               | 1879371           | i                 |        | intergenic |           |            |
| O157                 | 2075820           | ns                |        | G2583_1842 | maeA      | CDS        |
| EDL933               | 2010690           | ins               |        | intergenic |           |            |
| CB9615               | 1882216           | s                 |        | G2583_1845 | osmC      | CDS        |
| O157                 | 2079029           | ns                |        | G2583_1846 | ddpF      | CDS        |
| O157                 | 2079647           | ns                |        | G2583_1847 | ddpD      | CDS        |
| CB9615               | 1884831           | s                 |        | G2583_1848 | ddpC      | CDS        |
| O157                 | 2082137           | del               |        | G2583_1849 | ddpB      | CDS        |
| O157                 | 2084563           | i                 |        | intergenic |           |            |
| O157                 | 2085515           | ns                |        | G2583_1852 | dos       | CDS        |
| O157                 | 2085751           | del-10            |        | G2583_1852 | dos       | CDS        |

| lineage <sup>a</sup> | site <sup>b</sup> | mutation          |        | gene       | Gene name | Type |
|----------------------|-------------------|-------------------|--------|------------|-----------|------|
|                      |                   | type <sup>c</sup> | recomb |            |           |      |
| CB9615               | 1891521           | s                 |        | G2583_1853 | yddV      | CDS  |
| CB9615               | 1893302           | ns                |        | G2583_1854 | yddW      | CDS  |
| O157                 | 2091724           | ns                |        | G2583_1855 | gadC      | CDS  |
| O157                 | 2093428           | del               |        | intergenic |           |      |
| CB9615               | 1897751           | i                 |        | intergenic |           |      |
| O157                 | 2094506           | s                 |        | G2583_1857 | pqqL      | CDS  |
| O157                 | 2095350           | ns                |        | G2583_1857 | pqqL      | CDS  |
| CB9615               | 1900706           | s                 |        | G2583_1857 | pqqL      | CDS  |
| O157                 | 2100054           | ns                |        | G2583_1859 | yddA      | CDS  |
| O157                 | 2100062           | s                 |        | G2583_1859 | yddA      | CDS  |
| CB9615               | 1904900           | i                 |        | intergenic |           |      |
| CB9615               | 1905233           | ns                |        | G2583_1860 | ydeM      | CDS  |
| O157                 | 2103917           | i                 |        | intergenic |           |      |
| O157                 | 2105396           | i                 |        | intergenic |           |      |
| CB9615               | 1911433           | s                 |        | G2583_1864 | ydeP      | CDS  |
| CB9615               | 1912162           | i                 |        | intergenic |           |      |
| O157                 | 2109492           | ns                |        | G2583_1866 | ydeR      | CDS  |
| CB9615               | 1915332           | ns                |        | G2583_1868 | fimD      | CDS  |
| O157                 | 2111112           | ns                |        | G2583_1868 | fimD      | CDS  |
| Sakai                | 2111156           | ns                |        | G2583_1868 | fimD      | CDS  |
| CB9615               | 1917088           | i                 |        | intergenic |           |      |
| CB9615               | 1918516           | ns                |        | G2583_1870 | fmlA      | CDS  |
| CB9615               | 1918897           | i                 |        | intergenic |           |      |
| Sakai                | 2115344           | i                 |        | intergenic |           |      |
| CB9615               | 1919658           | ins               |        | intergenic |           |      |
| O157                 | 2115869           | ns                |        | G2583_1872 | hipA      | CDS  |
| CB9615               | 1921520           | ns                |        | G2583_1874 | ydeU      | CDS  |
| CB9615               | 1923343           | ns                |        | G2583_1875 | ydeK      | CDS  |
| CB9615               | 1923497           | ns                |        | G2583_1875 | ydeK      | CDS  |
| O157                 | 2119322           | ns                |        | G2583_1875 | ydeK      | CDS  |
| O157                 | 2122287           | i                 |        | intergenic |           |      |
| O157                 | 2125595           | ns                |        | G2583_1878 | lsrA      | CDS  |
| CB9615               | 1934653           | ns                |        | G2583_1881 | lsrB      | CDS  |
| O157                 | 2130616           | ns                |        | G2583_1882 | lsrF      | CDS  |
| O157                 | 2131739           | ns                |        | G2583_1884 | tam       | CDS  |
| O157                 | 2133007           | i                 |        | intergenic |           |      |
| Sakai                | 2133132           | ins               |        | intergenic |           |      |
| CB9615               | 1938314           | s                 |        | G2583_1886 | uxaB      | CDS  |
| CB9615               | 1939752           | s                 |        | G2583_1887 | yneF      | CDS  |
| CB9615               | 1939775           | ns                |        | G2583_1887 | yneF      | CDS  |
| EDL933               | 1952349           | ins               |        | G2583_1887 | yneF      | CDS  |
| O157                 | 2136461           | ns                |        | G2583_1888 | yneG      | CDS  |
| O157                 | 2136467           | s                 |        | G2583_1888 | yneG      | CDS  |
| CB9615               | 1941610           | ns                |        | G2583_1888 | yneG      | CDS  |
| O157                 | 2138222           | ns                |        | G2583_1890 | yneI      | CDS  |

| lineage <sup>a</sup> | site <sup>b</sup> | mutation          |        | gene       | Gene name | Type       |
|----------------------|-------------------|-------------------|--------|------------|-----------|------------|
|                      |                   | type <sup>c</sup> | recomb |            |           |            |
| O157                 | 2138359           | s                 |        | G2583_1890 | yneI      | CDS        |
| CB9615               | 1944146           | s                 |        | G2583_1891 | yneJ      | CDS        |
| CB9615               | 1944290           | s                 |        | G2583_1891 | yneJ      | CDS        |
| Sakai                | 2140670           | nc                |        | G2583_1892 | yneK      | pseudogene |
| O157                 | 2141148           | nc                |        | G2583_1892 | yneK      | pseudogene |
| O157                 | 2141241           | nc                |        | G2583_1892 | yneK      | pseudogene |
| EDL933               | 1947035           | ins               |        | intergenic |           |            |
| O157                 | 2142663           | ns                |        | G2583_1894 | marC      | CDS        |
| O157                 | 2145176           | ns                |        | G2583_1898 | eamA      | CDS        |
| O55/O157             | 1951871           | i                 |        | intergenic |           |            |
| CB9615               | 1953251           | s                 |        | G2583_1901 | ftrA      | CDS        |
| CB9615               | 1954261           | s                 |        | G2583_1902 | ydeH      | CDS        |
| O157                 | 2149562           | ns                |        | G2583_1902 | ydeH      | CDS        |
| O157                 | 2150030           | s                 |        | G2583_1903 | ydeI      | CDS        |
| CB9615               | 1956112           | i                 |        | intergenic |           |            |
| CB9615               | 1956928           | s                 |        | G2583_1905 | dcp       | CDS        |
| CB9615               | 1960234           | i                 |        | intergenic |           |            |
| CB9615               | 1961209           | s                 |        | G2583_1909 | ydfI      | CDS        |
| CB9615               | 1961836           | ns                |        | G2583_1910 | ydfJ      | CDS        |
| O157                 | 2157556           | ns                |        | G2583_1910 | ydfJ      | CDS        |
| EDL933               | 1929919           | ins               |        | G2583_1911 | -         | CDS        |
| EDL933               | 1928838           | ns                |        | ECs2155    | -         | CDS        |
| Sakai/EDL933         | 2160964           | ns                | rec    | ECs2157    | -         | CDS        |
| Sakai/EDL933         | 2160982           | ns                | rec    | ECs2157    | -         | CDS        |
| Sakai/EDL933         | 2160991           | ns                | rec    | ECs2157    | -         | CDS        |
| Sakai/EDL933         | 2161003           | ns                | rec    | ECs2157    | -         | CDS        |
| Sakai/EDL933         | 2161015           | ns                | rec    | ECs2157    | -         | CDS        |
| Sakai/EDL933         | 2161038           | ns                | rec    | ECs2157    | -         | CDS        |
| Sakai/EDL933         | 2161066           | ns                | rec    | ECs2157    | -         | CDS        |
| Sakai/EDL933         | 2161083           | ns                | rec    | ECs2157    | -         | CDS        |
| Sakai/EDL933         | 2161092           | s                 | rec    | ECs2157    | -         | CDS        |
| Sakai/EDL933         | 2161142           | ns                | rec    | ECs2158    | -         | CDS        |
| Sakai/EDL933         | 2161219           | ns                | rec    | ECs2158    | -         | CDS        |
| Sakai/EDL933         | 2161230           | ns                | rec    | ECs2158    | -         | CDS        |
| Sakai/EDL933         | 2161256           | s                 | rec    | ECs2158    | -         | CDS        |
| Sakai/EDL933         | 2161259           | ns                | rec    | ECs2158    | -         | CDS        |
| Sakai/EDL933         | 2161269           | ns                | rec    | ECs2158    | -         | CDS        |
| Sakai/EDL933         | 2161285           | ns                | rec    | ECs2158    | -         | CDS        |
| Sakai/EDL933         | 2161305           | ns                | rec    | ECs2158    | -         | CDS        |
| Sakai/EDL933         | 2161307           | ns                | rec    | ECs2158    | -         | CDS        |
| Sakai/EDL933         | 2161308           | ns                | rec    | ECs2158    | -         | CDS        |
| Sakai/EDL933         | 2161322           | s                 | rec    | ECs2158    | -         | CDS        |
| Sakai/EDL933         | 2161325           | s                 | rec    | ECs2158    | -         | CDS        |
| Sakai/EDL933         | 2161328           | s                 | rec    | ECs2158    | -         | CDS        |
| Sakai/EDL933         | 2161334           | s                 | rec    | ECs2158    | -         | CDS        |

| lineage <sup>a</sup> | site <sup>b</sup> | mutation          |        | gene       | Gene name | Type |
|----------------------|-------------------|-------------------|--------|------------|-----------|------|
|                      |                   | type <sup>c</sup> | recomb |            |           |      |
| Sakai/EDL933         | 2161358           | s                 | rec    | ECs2158    | -         | CDS  |
| Sakai/EDL933         | 2188677           | i                 | rec    | intergenic |           |      |
| Sakai/EDL933         | 2188678           | i                 | rec    | intergenic |           |      |
| Sakai/EDL933         | 2188896           | i                 | rec    | intergenic |           |      |
| Sakai/EDL933         | 2189067           | ns                | rec    | ECs2190    | -         | CDS  |
| Sakai/EDL933         | 2189164           | ns                | rec    | ECs2190    | -         | CDS  |
| Sakai/EDL933         | 2189182           | indel             | rec    | ECs2190    | -         | CDS  |
| Sakai/EDL933         | 2189535           | nc                | rec    | argO5      | -         | tRNA |
| Sakai/EDL933         | 2190252           | ns                | rec    | ECs2191    | -         | CDS  |
| Sakai/EDL933         | 2190267           | ns                | rec    | ECs2191    | -         | CDS  |
| Sakai/EDL933         | 2190347           | ns                | rec    | ECs2191    | -         | CDS  |
| Sakai/EDL933         | 2192509           | ns                | rec    | ECs2195    | -         | CDS  |
| Sakai/EDL933         | 2193209           | ns                | rec    | ECs2196    | -         | CDS  |
| Sakai/EDL933         | 2193225           | ns                | rec    | ECs2196    | -         | CDS  |
| Sakai/EDL933         | 2193226           | indel             | rec    | ECs2196    | -         | CDS  |
| Sakai/EDL933         | 2193877           | indel             | rec    | intergenic |           |      |
| Sakai/EDL933         | 2193903           | i                 | rec    | intergenic |           |      |
| Sakai/EDL933         | 2194158           | i                 | rec    | intergenic |           |      |
| Sakai/EDL933         | 2194215           | i                 | rec    | intergenic |           |      |
| EDL933               | 1886140           | ins               |        | ECs2204    | -         | CDS  |
| EDL933               | 1884950           | ns                |        | ECs2206    | -         | CDS  |
| EDL933               | 1881454           | ns                |        | ECs2213    | -         | CDS  |
| EDL933               | 1877194           | ns                |        | ECs2222    | -         | CDS  |
| EDL933               | 1877164           | ns                |        | ECs2222    | -         | CDS  |
| EDL933               | 1876613           | ins               |        | ECs2224    | -         | CDS  |
| EDL933               | 1876215           | ins               |        | ECs2224    | -         | CDS  |
| EDL933               | 1875666           | ins               |        | ECs2224    | -         | CDS  |
| EDL933               | 1875215           | ins               |        | ECs2224    | -         | CDS  |
| EDL933               | 1875170           | ins               |        | ECs2224    | -         | CDS  |
| EDL933               | 1875164           | ins               |        | ECs2224    | -         | CDS  |
| EDL933               | 1874498           | ins               |        | G2583_1913 | -         | CDS  |
| O55/O157             | 1964910           | ns                |        | G2583_1913 | -         | CDS  |
| EDL933               | 1873080           | ins               |        | G2583_1916 | -         | CDS  |
| O157                 | 2211399           | ns                |        | G2583_1916 | -         | CDS  |
| EDL933               | 1872584           | ins               |        | G2583_1916 | -         | CDS  |
| O157                 | 2211554           | ins               |        | intergenic |           |      |
| CB9615               | 1966939           | i                 |        | intergenic |           |      |
| EDL933               | 2306602           | s                 | rec    | ECs2251    | -         | CDS  |
| EDL933               | 2306626           | s                 | rec    | ECs2251    | -         | CDS  |
| EDL933               | 2306662           | s                 | rec    | ECs2251    | -         | CDS  |
| EDL933               | 2306692           | s                 | rec    | ECs2251    | -         | CDS  |
| EDL933               | 2306695           | s                 | rec    | ECs2251    | -         | CDS  |
| EDL933               | 2306704           | s                 | rec    | ECs2251    | -         | CDS  |
| EDL933               | 2306710           | s                 | rec    | ECs2251    | -         | CDS  |
| EDL933               | 2306722           | s                 | rec    | ECs2251    | -         | CDS  |

| lineage <sup>a</sup> | site <sup>b</sup> | mutation          |        | gene       | Gene name | Type |
|----------------------|-------------------|-------------------|--------|------------|-----------|------|
|                      |                   | type <sup>c</sup> | recomb |            |           |      |
| EDL933               | 2306727           | ns                | rec    | ECs2251    | -         | CDS  |
| EDL933               | 2306743           | s                 | rec    | ECs2251    | -         | CDS  |
| EDL933               | 2306749           | s                 | rec    | ECs2251    | -         | CDS  |
| EDL933               | 2306760           | s                 | rec    | ECs2251    | -         | CDS  |
| EDL933               | 2306780           | ns                | rec    | ECs2251    | -         | CDS  |
| EDL933               | 2306831           | ns                | rec    | ECs2251    | -         | CDS  |
| CB9615               | 1989147           | s                 |        | G2583_1941 | -         | CDS  |
| O157                 | 2234921           | ns                |        | G2583_1941 | -         | CDS  |
| O55/O157             | 1990458           | i                 | rec    | intergenic |           |      |
| O55/O157             | 1990549           | i                 | rec    | intergenic |           |      |
| O55/O157             | 1990620           | s                 | rec    | G2583_1943 | -         | CDS  |
| O55/O157             | 1990626           | s                 | rec    | G2583_1943 | -         | CDS  |
| O55/O157             | 1990641           | s                 | rec    | G2583_1943 | -         | CDS  |
| O55/O157             | 1990695           | s                 | rec    | G2583_1943 | -         | CDS  |
| O55/O157             | 1990707           | s                 | rec    | G2583_1943 | -         | CDS  |
| O55/O157             | 1990743           | s                 | rec    | G2583_1943 | -         | CDS  |
| O55/O157             | 1990770           | s                 | rec    | G2583_1943 | -         | CDS  |
| O55/O157             | 1990797           | s                 | rec    | G2583_1943 | -         | CDS  |
| O55/O157             | 1990912           | ns                | rec    | G2583_1943 | -         | CDS  |
| O55/O157             | 1991021           | ns                | rec    | G2583_1943 | -         | CDS  |
| O55/O157             | 1991025           | s                 | rec    | G2583_1943 | -         | CDS  |
| O55/O157             | 1991031           | ns                | rec    | G2583_1943 | -         | CDS  |
| O55/O157             | 1991032           | ns                | rec    | G2583_1943 | -         | CDS  |
| O55/O157             | 1991225           | ns                | rec    | G2583_1944 | -         | CDS  |
| O55/O157             | 1991227           | ns                | rec    | G2583_1944 | -         | CDS  |
| EDL933               | 1991231           | s                 |        | G2583_1944 | -         | CDS  |
| O55/O157             | 1991231           | s                 | rec    | G2583_1944 | -         | CDS  |
| Sakai                | 1991231           | s                 |        | G2583_1944 | -         | CDS  |
| EDL933               | 2311936           | s                 |        | G2583_1944 | -         | CDS  |
| O55/O157             | 1991339           | s                 | rec    | G2583_1944 | -         | CDS  |
| O55/O157             | 1991481           | i                 | rec    | intergenic |           |      |
| O55/O157             | 1991508           | s                 | rec    | G2583_1945 | -         | CDS  |
| O55/O157             | 1991514           | s                 | rec    | G2583_1945 | -         | CDS  |
| O55/O157             | 1991518           | ns                | rec    | G2583_1945 | -         | CDS  |
| O55/O157             | 1991520           | s                 | rec    | G2583_1945 | -         | CDS  |
| O55/O157             | 1991523           | s                 | rec    | G2583_1945 | -         | CDS  |
| O55/O157             | 1991538           | s                 | rec    | G2583_1945 | -         | CDS  |
| O55/O157             | 1991547           | s                 | rec    | G2583_1945 | -         | CDS  |
| O55/O157             | 1991556           | s                 | rec    | G2583_1945 | -         | CDS  |
| O55/O157             | 1991580           | s                 | rec    | G2583_1945 | -         | CDS  |
| O55/O157             | 1991673           | s                 | rec    | G2583_1945 | -         | CDS  |
| EDL933               | 2315689           | ins-2             |        | ECs2266    | -         | CDS  |
| EDL933               | 2324754           | i                 |        | intergenic |           |      |
| Sakai                | 2249978           | ns                |        | ECs2283    | -         | CDS  |
| CB9615               | 2012313           | i                 |        | intergenic |           |      |

| lineage <sup>a</sup> | site <sup>b</sup> | mutation          |        | gene       | Gene name | Type |
|----------------------|-------------------|-------------------|--------|------------|-----------|------|
|                      |                   | type <sup>c</sup> | recomb |            |           |      |
| O157                 | 2255206           | ns                |        | G2583_1976 | ynfA      | CDS  |
| O157                 | 2258375           | ns                |        | G2583_1981 | ynfE      | CDS  |
| CB9615               | 2017353           | ns                |        | G2583_1981 | ynfE      | CDS  |
| CB9615               | 2017683           | i                 |        | intergenic |           |      |
| CB9615               | 2017806           | ns                |        | G2583_1982 | ynfF      | CDS  |
| O157                 | 2261242           | ns                |        | G2583_1982 | ynfF      | CDS  |
| CB9615               | 2021482           | s                 |        | G2583_1984 | ynfH      | CDS  |
| CB9615               | 2021834           | ns                |        | G2583_1985 | dmsD      | CDS  |
| EDL933               | 2346304           | i                 |        | intergenic |           |      |
| O157                 | 2271124           | i                 |        | intergenic |           |      |
| Sakai                | 2272248           | del               |        | G2583_1992 | ydgD      | CDS  |
| CB9615               | 2029777           | ns                |        | G2583_1992 | ydgD      | CDS  |
| O157                 | 2273726           | ns                |        | G2583_1995 | tqsA      | CDS  |
| O157                 | 2277665           | ns                |        | G2583_1997 | pntA      | CDS  |
| O157                 | 2278458           | s                 |        | G2583_1998 | ydgH      | CDS  |
| CB9615               | 2036980           | ns                |        | G2583_1999 | ydgI      | CDS  |
| O157                 | 2282037           | ns                |        | G2583_2002 | rstA      | CDS  |
| Sakai                | 2283012           | ns                |        | G2583_2003 | rstB      | CDS  |
| EDL933               | 2359335           | ins               |        | G2583_2004 | tus       | CDS  |
| O157                 | 2289099           | s                 |        | G2583_2007 | manA      | CDS  |
| O157                 | 2290138           | s                 |        | G2583_2008 | ydgA      | CDS  |
| O157                 | 2294915           | ns                |        | G2583_2011 | uidA      | CDS  |
| O157                 | 2295006           | ins-2             |        | G2583_2011 | uidA      | CDS  |
| O157                 | 2295600           | ns                |        | G2583_2011 | uidA      | CDS  |
| O157                 | 2295934           | i                 |        | intergenic |           |      |
| O157                 | 2296491           | s                 |        | G2583_2012 | uidR      | CDS  |
| CB9615               | 2054336           | s                 |        | G2583_2013 | hdhA      | CDS  |
| CB9615               | 2059604           | ns                |        | G2583_2017 | add       | CDS  |
| EDL933               | 2379344           | ins               |        | intergenic |           |      |
| CB9615               | 2061406           | i                 |        | intergenic |           |      |
| O157                 | 2307940           | ns                |        | G2583_2024 | rsxC      | CDS  |
| CB9615               | 2065771           | ns                |        | G2583_2024 | rsxC      | CDS  |
| EDL933               | 2383815           | ns                |        | G2583_2024 | rsxC      | CDS  |
| EDL933               | 2383829           | s                 |        | G2583_2024 | rsxC      | CDS  |
| EDL933               | 2383835           | s                 |        | G2583_2024 | rsxC      | CDS  |
| O157                 | 2310653           | s                 |        | G2583_2027 | rsxE      | CDS  |
| O157                 | 2311553           | ns                |        | G2583_2028 | nth       | CDS  |
| O157                 | 2312057           | i                 |        | intergenic |           |      |
| O157                 | 2312150           | i                 |        | intergenic |           |      |
| CB9615               | 2072702           | ns                |        | G2583_2031 | pdxY      | CDS  |
| EDL933               | 2392168           | ins               |        | intergenic |           |      |
| O157                 | 2317755           | i                 |        | intergenic |           |      |
| O157                 | 2318157           | i                 |        | intergenic |           |      |
| CB9615               | 2076155           | s                 |        | G2583_2035 | anmK      | CDS  |
| O157                 | 2319096           | ns                |        | G2583_2035 | anmK      | CDS  |

| lineage <sup>a</sup> | site <sup>b</sup> | mutation          |        | gene       | Gene name | Type       |
|----------------------|-------------------|-------------------|--------|------------|-----------|------------|
|                      |                   | type <sup>c</sup> | recomb |            |           |            |
| CB9615               | 2076470           | s                 |        | G2583_2035 | anmK      | CDS        |
| EDL933               | 2394763           | ins               |        | intergenic |           |            |
| O157                 | 2320152           | s                 |        | G2583_2037 | slyA      | CDS        |
| O157                 | 2320694           | i                 |        | intergenic |           |            |
| O157                 | 2323563           | ns                |        | G2583_2040 | ydhK      | CDS        |
| O157                 | 2324571           | ns                |        | G2583_2042 | ydhF      | CDS        |
| O157                 | 2328300           | s                 |        | G2583_2047 | rnt       | CDS        |
| CB9615               | 2086448           | ns                |        | G2583_2048 | lhr       | CDS        |
| O157                 | 2329370           | s                 |        | G2583_2048 | lhr       | CDS        |
| O157                 | 2330070           | ns                |        | G2583_2048 | lhr       | CDS        |
| O157                 | 2330900           | s                 |        | G2583_2048 | lhr       | CDS        |
| CB9615               | 2089674           | ns                |        | G2583_2048 | lhr       | CDS        |
| O157                 | 2334471           | ns                |        | G2583_2050 | ydhO      | CDS        |
| O157                 | 2336109           | ns                |        | G2583_2052 | ydhP      | CDS        |
| O157                 | 2336134           | ns                |        | G2583_2052 | ydhP      | CDS        |
| CB9615               | 2094383           | ins               |        | intergenic |           |            |
| CB9615               | 2094845           | i                 |        | intergenic |           |            |
| O157                 | 2337749           | s                 |        | G2583_2053 | purR      | CDS        |
| CB9615               | 2096607           | ns                |        | G2583_2054 | ydhB      | CDS        |
| O157                 | 2340245           | s                 |        | G2583_2055 | ydhC      | CDS        |
| O157                 | 2342030           | ns                |        | G2583_2056 | cfa       | CDS        |
| O157                 | 2342329           | ns                |        | G2583_2057 | ribC      | CDS        |
| CB9615               | 2100032           | ns                |        | G2583_2057 | ribC      | CDS        |
| EDL933               | 2418251           | ins               |        | intergenic |           |            |
| EDL933               | 2418263           | ins               |        | intergenic |           |            |
| O157                 | 2343203           | s                 |        | G2583_2058 | mdtK      | CDS        |
| CB9615               | 2101497           | ns                |        | G2583_2058 | mdtK      | CDS        |
| O157                 | 2344492           | ns                |        | G2583_2058 | mdtK      | CDS        |
| CB9615               | 2102468           | ns                |        | G2583_2059 | ydhQ      | CDS        |
| CB9615               | 2102650           | s                 |        | G2583_2059 | ydhQ      | CDS        |
| O157                 | 2346310           | i                 |        | intergenic |           |            |
| O157                 | 2346625           | ns                |        | G2583_2062 | ydhR      | CDS        |
| O157                 | 2352200           | ns                |        | G2583_2068 | ydhV      | CDS        |
| CB9615               | 2110600           | ns                |        | G2583_2068 | ydhV      | CDS        |
| O157                 | 2354319           | i                 |        | intergenic |           |            |
| O157                 | 2354526           | i                 |        | intergenic |           |            |
| O157                 | 2355009           | i                 |        | intergenic |           |            |
| CB9615               | 2114878           | ns                |        | G2583_2073 | ynhG      | CDS        |
| CB9615               | 2114943           | ns                |        | G2583_2073 | ynhG      | CDS        |
| O157                 | 2357729           | s                 |        | G2583_2073 | ynhG      | CDS        |
| O157                 | 2363113           | ns                |        | G2583_2078 | sufB      | CDS        |
| O157                 | 2364173           | i                 |        | intergenic |           |            |
| O157                 | 2364465           | nc                |        | G2583_2080 | -         | pseudogene |
| CB9615               | 2124543           | s                 |        | G2583_2083 | ydiJ      | CDS        |
| O157                 | 2367630           | s                 |        | G2583_2083 | ydiJ      | CDS        |

| lineage <sup>a</sup> | site <sup>b</sup> | mutation          |        | gene       | Gene name | Type |
|----------------------|-------------------|-------------------|--------|------------|-----------|------|
|                      |                   | type <sup>c</sup> | recomb |            |           |      |
| O157                 | 2368236           | s                 |        | G2583_2083 | ydiJ      | CDS  |
| CB9615               | 2129197           | del-9             |        | G2583_2087 | ydiM      | CDS  |
| O157                 | 2373010           | s                 |        | G2583_2088 | ydiN      | CDS  |
| O157                 | 2373421           | ns                |        | G2583_2088 | ydiN      | CDS  |
| O157                 | 2375834           | s                 |        | G2583_2091 | ydiF      | CDS  |
| CB9615               | 2133633           | ns                |        | G2583_2091 | ydiF      | CDS  |
| CB9615               | 2133915           | ns                |        | G2583_2091 | ydiF      | CDS  |
| EDL933               | 2454223           | ins               |        | intergenic |           |      |
| EDL933               | 2454229           | ins               |        | intergenic |           |      |
| EDL933               | 2454259           | ins               |        | intergenic |           |      |
| EDL933               | 2454271           | ins               |        | intergenic |           |      |
| EDL933               | 2454284           | ins               |        | intergenic |           |      |
| CB9615               | 2136873           | s                 |        | G2583_2094 | ydiQ      | CDS  |
| CB9615               | 2137856           | ns                |        | G2583_2095 | ydiR      | CDS  |
| CB9615               | 2138741           | s                 |        | G2583_2096 | ydiS      | CDS  |
| CB9615               | 2140260           | s                 |        | G2583_2098 | fadK      | CDS  |
| O157                 | 2382978           | s                 |        | G2583_2098 | fadK      | CDS  |
| CB9615               | 2141836           | ns                |        | G2583_2099 | pps       | CDS  |
| EDL933               | 2461084           | ns                |        | G2583_2099 | pps       | CDS  |
| O157                 | 2386002           | s                 |        | G2583_2099 | pps       | CDS  |
| O157                 | 2386770           | ns                |        | G2583_2099 | pps       | CDS  |
| O157                 | 2386947           | i                 |        | intergenic |           |      |
| O157                 | 2388500           | ns                |        | G2583_2101 | aroH      | CDS  |
| O157                 | 2390081           | ns                |        | G2583_2103 | ydiU      | CDS  |
| O157                 | 2391291           | s                 |        | G2583_2104 | ydiV      | CDS  |
| CB9615               | 2149142           | i                 |        | intergenic |           |      |
| CB9615               | 2151609           | s                 |        | G2583_2108 | btuC      | CDS  |
| EDL933               | 2470125           | ins               |        | intergenic |           |      |
| CB9615               | 2188835           | s                 |        | G2583_2160 | pheT      | CDS  |
| CB9615               | 2190258           | ns                |        | G2583_2160 | pheT      | CDS  |
| CB9615               | 2193073           | s                 |        | G2583_2165 | infC      | CDS  |
| O157                 | 2402254           | s                 |        | G2583_2166 | thrS      | CDS  |
| O157                 | 2402595           | i                 |        | intergenic |           |      |
| O157                 | 2402915           | i                 |        | intergenic |           |      |
| CB9615               | 2196051           | del               |        | intergenic |           |      |
| O157                 | 2405057           | s                 |        | G2583_2168 | ydiY      | CDS  |
| O157                 | 2405150           | s                 |        | G2583_2168 | ydiY      | CDS  |
| O157                 | 2408364           | s                 |        | G2583_2171 | yniA      | CDS  |
| EDL933               | 2483622           | s                 |        | G2583_2172 | yniB      | CDS  |
| O157                 | 2408657           | s                 |        | G2583_2172 | yniB      | CDS  |
| O157                 | 2409000           | i                 |        | intergenic |           |      |
| Sakai                | 2409083           | i                 |        | intergenic |           |      |
| EDL933               | 2484908           | ns                |        | G2583_2173 | yniC      | CDS  |
| O157                 | 2411105           | ns                |        | G2583_2175 | ydjN      | CDS  |
| O157                 | 2412151           | del               |        | G2583_2176 | ydjO      | CDS  |



| lineage <sup>a</sup> | site <sup>b</sup> | mutation          |        | gene       | Gene name | Type |
|----------------------|-------------------|-------------------|--------|------------|-----------|------|
|                      |                   | type <sup>c</sup> | recomb |            |           |      |
| CB9615               | 2208397           | s                 |        | G2583_2178 | katE      | CDS  |
| O157                 | 2416466           | ns                |        | G2583_2179 | chbG      | CDS  |
| O157                 | 2419218           | s                 |        | G2583_2182 | chbA      | CDS  |
| O157                 | 2419507           | ns                |        | G2583_2183 | chbC      | CDS  |
| CB9615               | 2213163           | s                 |        | G2583_2183 | chbC      | CDS  |
| O157                 | 2421780           | i                 |        | intergenic |           |      |
| CB9615               | 2215212           | ns                |        | G2583_2186 | nadE      | CDS  |
| O157                 | 2422346           | ns                |        | G2583_2186 | nadE      | CDS  |
| O157                 | 2422823           | i                 |        | intergenic |           |      |
| Sakai                | 2425295           | del               |        | intergenic |           |      |
| O157                 | 2425508           | s                 |        | G2583_2190 | astE      | CDS  |
| O157                 | 2426710           | s                 |        | G2583_2191 | astB      | CDS  |
| O157                 | 2428497           | s                 |        | G2583_2192 | astD      | CDS  |
| O157                 | 2428646           | ns                |        | G2583_2192 | astD      | CDS  |
| CB9615               | 2221818           | s                 |        | G2583_2192 | astD      | CDS  |
| O157                 | 2428968           | s                 |        | G2583_2192 | astD      | CDS  |
| CB9615               | 2223336           | ns                |        | G2583_2194 | astC      | CDS  |
| O157                 | 2430802           | s                 |        | G2583_2194 | astC      | CDS  |
| O157                 | 2431592           | i                 |        | intergenic |           |      |
| O157                 | 2431966           | s                 |        | G2583_2195 | xthA      | CDS  |
| O157                 | 2436220           | ns                |        | G2583_2200 | ynjB      | CDS  |
| O157                 | 2437603           | ns                |        | G2583_2201 | ynjC      | CDS  |
| O157                 | 2439117           | ns                |        | G2583_2203 | ynjE      | CDS  |
| O157                 | 2439501           | ns                |        | G2583_2203 | ynjE      | CDS  |
| CB9615               | 2232945           | s                 |        | G2583_2203 | ynjE      | CDS  |
| O157                 | 2444848           | ns                |        | G2583_2209 | topB      | CDS  |
| CB9615               | 2240127           | ns                |        | G2583_2210 | selD      | CDS  |
| O157                 | 2449258           | ns                |        | G2583_2212 | sppA      | CDS  |
| CB9615               | 2242841           | ns                |        | G2583_2212 | sppA      | CDS  |
| O157                 | 2449973           | ns                |        | G2583_2212 | sppA      | CDS  |
| CB9615               | 2245333           | ns                |        | G2583_2215 | pncA      | CDS  |
| EDL933               | 2529969           | ns                | rec    | ECs2478    | -         | CDS  |
| EDL933               | 2530015           | ns                | rec    | ECs2478    | -         | CDS  |
| EDL933               | 2530017           | ns                | rec    | ECs2478    | -         | CDS  |
| EDL933               | 2530022           | ns                | rec    | ECs2478    | -         | CDS  |
| O157                 | 2456621           | ns                |        | G2583_2218 | ydjG      | CDS  |
| CB9615               | 2249632           | ns                |        | G2583_2219 | ydjH      | CDS  |
| O157                 | 2458034           | ns                |        | G2583_2219 | ydjH      | CDS  |
| O157                 | 2458362           | ns                |        | G2583_2219 | ydjH      | CDS  |
| CB9615               | 2251460           | ns                |        | G2583_2221 | ydjJ      | CDS  |
| O157                 | 2460898           | ns                |        | G2583_2222 | ydjK      | CDS  |
| O157                 | 2463011           | i                 |        | intergenic |           |      |
| CB9615               | 2253996           | i                 |        | intergenic |           |      |
| O157                 | 2463095           | i                 |        | intergenic |           |      |
| O157                 | 2467385           | ns                |        | G2583_2229 | mipA      | CDS  |

| lineage <sup>a</sup> | site <sup>b</sup> | mutation          |        | gene       | Gene name | Type |
|----------------------|-------------------|-------------------|--------|------------|-----------|------|
|                      |                   | type <sup>c</sup> | recomb |            |           |      |
| O157                 | 2467507           | ns                |        | G2583_2229 | mipA      | CDS  |
| CB9615               | 2259638           | s                 |        | G2583_2230 | yeaG      | CDS  |
| O157                 | 2471893           | i                 |        | intergenic |           |      |
| O157                 | 2474192           | ns                |        | G2583_2233 | yeaJ      | CDS  |
| CB9615               | 2265975           | ns                |        | G2583_2233 | yeaJ      | CDS  |
| O157                 | 2480166           | ns                |        | G2583_2241 | yeaP      | CDS  |
| O157                 | 2481626           | i                 |        | intergenic |           |      |
| O157                 | 2482171           | ns                |        | G2583_2245 | leuE      | CDS  |
| CB9615               | 2277357           | s                 |        | G2583_2248 | yeaV      | CDS  |
| CB9615               | 2277452           | ns                |        | G2583_2249 | yeaW      | CDS  |
| O157                 | 2487750           | ns                |        | G2583_2250 | yeaX      | CDS  |
| O157                 | 2487838           | s                 |        | G2583_2250 | yeaX      | CDS  |
| O157                 | 2488046           | ns                |        | G2583_2250 | yeaX      | CDS  |
| O157                 | 2488189           | ns                |        | G2583_2250 | yeaX      | CDS  |
| O157                 | 2488195           | s                 |        | G2583_2250 | yeaX      | CDS  |
| EDL933               | 2563854           | ins               |        | intergenic |           |      |
| O157                 | 2490115           | s                 |        | G2583_2253 | fadD      | CDS  |
| O157                 | 2490201           | s                 |        | G2583_2253 | fadD      | CDS  |
| O157                 | 2490378           | ns                |        | G2583_2253 | fadD      | CDS  |
| CB9615               | 2282267           | s                 |        | G2583_2253 | fadD      | CDS  |
| CB9615               | 2282866           | ns                |        | G2583_2254 | yeaY      | CDS  |
| O157                 | 2493862           | s                 |        | G2583_2256 | yoaA      | CDS  |
| O157                 | 2495854           | i                 |        | intergenic |           |      |
| O157                 | 2497152           | s                 |        | G2583_2260 | pabB      | CDS  |
| O157                 | 2497229           | ns                |        | G2583_2260 | pabB      | CDS  |
| EDL933               | 2497478           | ns                |        | G2583_2260 | pabB      | CDS  |
| O157                 | 2497478           | ns                |        | G2583_2260 | pabB      | CDS  |
| Sakai                | 2497478           | ns                |        | G2583_2260 | pabB      | CDS  |
| Sakai                | 2497693           | ns                |        | G2583_2260 | pabB      | CDS  |
| O157                 | 2497905           | s                 |        | G2583_2260 | pabB      | CDS  |
| O157                 | 2500922           | ns                |        | G2583_2263 | yoaD      | CDS  |
| O157                 | 2500955           | ns                |        | G2583_2263 | yoaD      | CDS  |
| EDL933               | 2579047           | ins               |        | intergenic |           |      |
| EDL933               | 2579062           | ins               |        | intergenic |           |      |
| O157                 | 2504704           | s                 |        | G2583_2266 | manX      | CDS  |
| O157                 | 2504889           | i                 |        | intergenic |           |      |
| CB9615               | 2298152           | i                 |        | intergenic |           |      |
| O157                 | 2509603           | del               |        | intergenic |           |      |
| CB9615               | 2300616           | i                 |        | intergenic |           |      |
| O157                 | 2509845           | ins               |        | intergenic |           |      |
| O157                 | 2510150           | s                 |        | G2583_2274 | yebO      | CDS  |
| CB9615               | 2301418           | ns                |        | G2583_2275 | mgrB      | CDS  |
| O157                 | 2510655           | i                 |        | intergenic |           |      |
| O157                 | 2510858           | ns                |        | G2583_2276 | yobH      | CDS  |
| EDL933               | 2586240           | ins               |        | intergenic |           |      |

| lineage <sup>a</sup> | site <sup>b</sup> | mutation          |        | gene       | Gene name | Type |
|----------------------|-------------------|-------------------|--------|------------|-----------|------|
|                      |                   | type <sup>c</sup> | recomb |            |           |      |
| EDL933               | 2587381           | s                 |        | G2583_2278 | yebQ      | CDS  |
| EDL933               | 2589737           | i                 |        | intergenic |           |      |
| O157                 | 2521259           | s                 |        | G2583_2284 | yebT      | CDS  |
| O157                 | 2521611           | ns                |        | G2583_2284 | yebT      | CDS  |
| CB9615               | 2313885           | ns                |        | G2583_2285 | rsmF      | CDS  |
| CB9615               | 2314782           | ns                |        | G2583_2286 | yebV      | CDS  |
| CB9615               | 2317964           | ns                |        | G2583_2294 | holE      | CDS  |
| CB9615               | 2318692           | ns                |        | G2583_2295 | yobB      | CDS  |
| O157                 | 2528063           | ns                |        | G2583_2296 | exoX      | CDS  |
| O157                 | 2528914           | ns                |        | G2583_2297 | ptrB      | CDS  |
| CB9615               | 2320307           | ns                |        | G2583_2297 | ptrB      | CDS  |
| O157                 | 2529900           | s                 |        | G2583_2297 | ptrB      | CDS  |
| CB9615               | 2321220           | ns                |        | G2583_2297 | ptrB      | CDS  |
| O157                 | 2530416           | s                 |        | G2583_2297 | ptrB      | CDS  |
| EDL933               | 2607040           | ins               |        | intergenic |           |      |
| CB9615               | 2323458           | ns                |        | G2583_2300 | yebG      | CDS  |
| O157                 | 2532606           | i                 |        | intergenic |           |      |
| O157                 | 2532635           | i                 |        | intergenic |           |      |
| O157                 | 2538112           | s                 |        | G2583_2304 | zwf       | CDS  |
| O157                 | 2538120           | ns                |        | G2583_2304 | zwf       | CDS  |
| CB9615               | 2329216           | i                 |        | intergenic |           |      |
| O157                 | 2539816           | ns                |        | G2583_2306 | pykA      | CDS  |
| CB9615               | 2334479           | ns                |        | G2583_2309 | znuA      | CDS  |
| O157                 | 2543574           | s                 |        | G2583_2309 | znuA      | CDS  |
| CB9615               | 2334850           | ns                |        | G2583_2309 | znuA      | CDS  |
| O157                 | 2544439           | i                 |        | intergenic |           |      |
| EDL933               | 2619755           | ns                |        | G2583_2310 | znuC      | CDS  |
| CB9615               | 2335606           | s                 |        | G2583_2310 | znuC      | CDS  |
| O157                 | 2545924           | ns                |        | G2583_2311 | znuB      | CDS  |
| O157                 | 2547985           | i                 |        | intergenic |           |      |
| O157                 | 2548222           | ns                |        | G2583_2314 | yebB      | CDS  |
| CB9615               | 2341266           | s                 |        | G2583_2317 | nudB      | CDS  |
| O157                 | 2551489           | ns                |        | G2583_2318 | aspS      | CDS  |
| O157                 | 2551649           | s                 |        | G2583_2318 | aspS      | CDS  |
| O157                 | 2552681           | i                 |        | intergenic |           |      |
| O157                 | 2553794           | ns                |        | G2583_2320 | yecE      | CDS  |
| CB9615               | 2346001           | s                 |        | G2583_2322 | cmoA      | CDS  |
| O157                 | 2557968           | ns                |        | G2583_2324 | torZ      | CDS  |
| O157                 | 2558154           | ns                |        | G2583_2324 | torZ      | CDS  |
| O157                 | 2559990           | ns                |        | G2583_2325 | torY      | CDS  |
| O157                 | 2560114           | i                 |        | intergenic |           |      |
| EDL933               | 2635515           | ins               |        | intergenic |           |      |
| EDL933               | 2635526           | ins               |        | intergenic |           |      |
| EDL933               | 2635548           | ins               |        | intergenic |           |      |
| O157                 | 2560927           | s                 |        | G2583_2326 | cutC      | CDS  |

| lineage <sup>a</sup> | site <sup>b</sup> | mutation          |        | gene       | Gene name | Type |
|----------------------|-------------------|-------------------|--------|------------|-----------|------|
|                      |                   | type <sup>c</sup> | recomb |            |           |      |
| O157                 | 2561473           | ns                |        | G2583_2327 | yecM      | CDS  |
| O157                 | 2562746           | ns                |        | G2583_2328 | argS      | CDS  |
| O157                 | 2566210           | s                 |        | G2583_2331 | flhA      | CDS  |
| O157                 | 2567148           | ns                |        | G2583_2332 | flhB      | CDS  |
| CB9615               | 2358858           | s                 |        | G2583_2332 | flhB      | CDS  |
| CB9615               | 2360624           | ns                |        | G2583_2335 | cheB      | CDS  |
| CB9615               | 2361613           | s                 |        | G2583_2336 | cheR      | CDS  |
| O157                 | 2571940           | s                 |        | G2583_2337 | tap       | CDS  |
| O157                 | 2573289           | ns                |        | G2583_2338 | tar       | CDS  |
| CB9615               | 2365408           | ns                |        | G2583_2338 | tar       | CDS  |
| CB9615               | 2370148           | ins               |        | intergenic |           |      |
| O157                 | 2579896           | ns                |        | G2583_2345 | flhD      | CDS  |
| CB9615               | 2371619           | i                 |        | intergenic |           |      |
| CB9615               | 2371655           | i                 |        | intergenic |           |      |
| O157                 | 2580804           | i                 |        | intergenic |           |      |
| O157                 | 2581344           | ns                |        | G2583_2347 | otsA      | CDS  |
| O157                 | 2581533           | ns                |        | G2583_2347 | otsA      | CDS  |
| O157                 | 2584040           | ns                |        | G2583_2349 | araH      | CDS  |
| O157                 | 2584402           | s                 |        | G2583_2349 | araH      | CDS  |
| O157                 | 2584432           | ns                |        | G2583_2349 | araH      | CDS  |
| EDL933               | 2660874           | ns                |        | G2583_2350 | araG      | CDS  |
| O157                 | 2586270           | i                 |        | intergenic |           |      |
| O157                 | 2587311           | i                 |        | intergenic |           |      |
| O157                 | 2587780           | i                 |        | intergenic |           |      |
| CB9615               | 2380218           | ins               |        | intergenic |           |      |
| EDL933               | 2669770           | ns                |        | ECs2619    | -         | CDS  |
| EDL933               | 2670185           | ns                |        | ECs2619    | -         | CDS  |
| EDL933               | 2674223           | ns                |        | ECs2630    | -         | CDS  |
| EDL933               | 2674230           | ns                |        | ECs2630    | -         | CDS  |
| EDL933               | 2674426           | ns                |        | ECs2632    | -         | CDS  |
| EDL933               | 2676082           | ns                |        | ECs2633    | -         | CDS  |
| EDL933               | 2676453           | ns                |        | ECs2633    | -         | CDS  |
| Sakai                | 2604364           | ns                |        | ECs2637    | -         | CDS  |
| EDL933               | 2683208           | ns                |        | ECs2641    | -         | CDS  |
| CB9615               | 2384842           | s                 |        | G2583_2363 | pgsA      | CDS  |
| O157                 | 2618227           | ns                |        | G2583_2366 | yecF      | CDS  |
| O157                 | 2619260           | i                 |        | intergenic |           |      |
| CB9615               | 2389485           | s                 |        | G2583_2368 | yecC      | CDS  |
| O157                 | 2620059           | s                 |        | G2583_2368 | yecC      | CDS  |
| O157                 | 2620304           | s                 |        | G2583_2369 | yecS      | CDS  |
| O157                 | 2621009           | ns                |        | G2583_2370 | dcyD      | CDS  |
| Sakai                | 2621341           | del               |        | G2583_2370 | dcyD      | CDS  |
| O157                 | 2624217           | i                 |        | intergenic |           |      |
| O157                 | 2624273           | i                 |        | intergenic |           |      |
| CB9615               | 2396466           | ins-9             |        | G2583_2375 | fliD      | CDS  |

| lineage <sup>a</sup> | site <sup>b</sup> | mutation          |        | gene       | Gene name | Type |
|----------------------|-------------------|-------------------|--------|------------|-----------|------|
|                      |                   | type <sup>c</sup> | recomb |            |           |      |
| CB9615               | 2396678           | ns                |        | G2583_2375 | fliD      | CDS  |
| O157                 | 2626896           | s                 |        | G2583_2375 | fliD      | CDS  |
| CB9615               | 2397084           | ns                |        | G2583_2375 | fliD      | CDS  |
| CB9615               | 2397311           | s                 |        | G2583_2375 | fliD      | CDS  |
| CB9615               | 2400966           | ns                |        | G2583_2380 | yedE      | CDS  |
| Sakai                | 2632861           | ns                |        | G2583_2382 | yedK      | CDS  |
| O157                 | 2633914           | ns                |        | G2583_2384 | yedM      | CDS  |
| O157                 | 2634233           | s                 |        | G2583_2384 | yedM      | CDS  |
| CB9615               | 2404684           | ns                |        | G2583_2384 | yedM      | CDS  |
| CB9615               | 2405372           | s                 |        | G2583_2385 | yedL      | CDS  |
| O157                 | 2635774           | i                 |        | intergenic |           |      |
| CB9615               | 2405650           | ns                |        | G2583_2386 | yedM      | CDS  |
| O157                 | 2636559           | ns                |        | G2583_2386 | yedM      | CDS  |
| O157                 | 2636652           | ns                |        | G2583_2386 | yedM      | CDS  |
| O157                 | 2636957           | i                 |        | intergenic |           |      |
| O157                 | 2638382           | ns                |        | G2583_2389 | fliF      | CDS  |
| CB9615               | 2411099           | ns                |        | G2583_2392 | fliI      | CDS  |
| Sakai                | 2642468           | ns                |        | G2583_2392 | fliI      | CDS  |
| O157                 | 2643500           | ns                |        | G2583_2394 | fliK      | CDS  |
| CB9615               | 2413610           | s                 |        | G2583_2394 | fliK      | CDS  |
| EDL933               | 2719369           | ins               |        | intergenic |           |      |
| CB9615               | 2418038           | i                 |        | intergenic |           |      |
| CB9615               | 2420583           | ns                |        | G2583_2406 | yedP      | CDS  |
| CB9615               | 2420891           | s                 |        | G2583_2407 | yedQ      | CDS  |
| EDL933               | 2727876           | ins               |        | intergenic |           |      |
| EDL933               | 2728490           | s                 |        | G2583_2409 | yedI      | CDS  |
| O157                 | 2653334           | ns                |        | G2583_2409 | yedI      | CDS  |
| CB9615               | 2426366           | ns                |        | G2583_2412 | dcm       | CDS  |
| O157                 | 2657412           | ns                |        | G2583_2413 | yedJ      | CDS  |
| O157                 | 2657768           | del               |        | G2583_2414 | yedR      | CDS  |
| O157                 | 2658005           | ns                |        | G2583_2414 | yedR      | CDS  |
| CB9615               | 2428072           | del               |        | intergenic |           |      |
| CB9615               | 2428231           | i                 |        | intergenic |           |      |
| CB9615               | 2428235           | i                 |        | intergenic |           |      |
| O157                 | 2658480           | i                 |        | intergenic |           |      |
| CB9615               | 2428279           | del               |        | intergenic |           |      |
| CB9615               | 2428290           | i                 |        | intergenic |           |      |
| CB9615               | 2428411           | ns                |        | G2583_2415 | ompS      | CDS  |
| O157                 | 2659202           | del               |        | G2583_2415 | ompS      | CDS  |
| O157                 | 2659204           | ns                |        | G2583_2415 | ompS      | CDS  |
| O157                 | 2659420           | ns                |        | G2583_2415 | ompS      | CDS  |
| O157                 | 2661521           | ns                |        | G2583_2418 | yedV      | CDS  |
| EDL933               | 2738701           | ins               |        | intergenic |           |      |
| O157                 | 2665745           | i                 |        | intergenic |           |      |
| CB9615               | 2436942           | s                 |        | G2583_2425 | yodB      | CDS  |

| lineage <sup>a</sup> | site <sup>b</sup> | mutation          |        | gene       | Gene name | Type |
|----------------------|-------------------|-------------------|--------|------------|-----------|------|
|                      |                   | type <sup>c</sup> | recomb |            |           |      |
| O157                 | 2667354           | ns                |        | G2583_2425 | yodB      | CDS  |
| EDL933               | 2742716           | ins               |        | G2583_2426 | -         | CDS  |
| O157                 | 2667880           | i                 |        | intergenic |           |      |
| EDL933               | 2743162           | ins               |        | intergenic |           |      |
| O55/O157             | 2439173           | i                 |        | intergenic |           |      |
| EDL933               | 2745061           | s                 | rec    | G2583_2429 | -         | CDS  |
| EDL933               | 2745100           | ns                | rec    | G2583_2429 | -         | CDS  |
| EDL933               | 2745170           | ns                | rec    | G2583_2429 | -         | CDS  |
| EDL933               | 2745254           | ns                | rec    | G2583_2429 | -         | CDS  |
| EDL933               | 2745256           | ns                | rec    | G2583_2429 | -         | CDS  |
| EDL933               | 2745258           | ns                | rec    | G2583_2429 | -         | CDS  |
| EDL933               | 2745287           | s                 | rec    | G2583_2429 | -         | CDS  |
| EDL933               | 2745311           | ns                | rec    | G2583_2429 | -         | CDS  |
| EDL933               | 2745351           | ns                | rec    | G2583_2429 | -         | CDS  |
| EDL933               | 2745395           | ns                | rec    | G2583_2429 | -         | CDS  |
| EDL933               | 2745397           | ns                | rec    | G2583_2429 | -         | CDS  |
| EDL933               | 2745428           | s                 | rec    | G2583_2429 | -         | CDS  |
| CB9615               | 2440023           | ns                | rec    | G2583_2429 | -         | CDS  |
| EDL933               | 2745492           | ns                | rec    | G2583_2429 | -         | CDS  |
| Sakai                | 2670319           | ns                | rec    | G2583_2429 | -         | CDS  |
| Sakai                | 2670321           | ns                | rec    | G2583_2429 | -         | CDS  |
| Sakai                | 2670352           | s                 | rec    | G2583_2429 | -         | CDS  |
| CB9615               | 2440164           | ns                | rec    | G2583_2429 | -         | CDS  |
| Sakai                | 2694827           | ns                | rec    | ECs2746    | -         | CDS  |
| Sakai                | 2694831           | ns                | rec    | ECs2746    | -         | CDS  |
| Sakai                | 2694855           | ns                | rec    | ECs2746    | -         | CDS  |
| Sakai                | 2694992           | ns                | rec    | ECs2746    | -         | CDS  |
| Sakai                | 2695102           | s                 | rec    | ECs2746    | -         | CDS  |
| EDL933               | 2771924           | ns                | rec    | ECs2746    | -         | CDS  |
| EDL933               | 2772135           | s                 | rec    | ECs2746    | -         | CDS  |
| EDL933               | 2772139           | ns                | rec    | ECs2746    | -         | CDS  |
| EDL933               | 2772141           | s                 | rec    | ECs2746    | -         | CDS  |
| EDL933               | 2772147           | ns                | rec    | ECs2746    | -         | CDS  |
| EDL933               | 2772149           | ns                | rec    | ECs2746    | -         | CDS  |
| EDL933               | 2772155           | ns                | rec    | ECs2746    | -         | CDS  |
| EDL933               | 2772165           | ns                | rec    | ECs2746    | -         | CDS  |
| EDL933               | 2772166           | ns                | rec    | ECs2746    | -         | CDS  |
| EDL933               | 2772171           | ns                | rec    | ECs2746    | -         | CDS  |
| EDL933               | 2772225           | ns                | rec    | ECs2746    | -         | CDS  |
| EDL933               | 2772278           | ns                | rec    | ECs2746    | -         | CDS  |
| EDL933               | 2772301           | ns                | rec    | ECs2746    | -         | CDS  |
| EDL933               | 2772339           | ns                | rec    | ECs2746    | -         | CDS  |
| EDL933               | 2772342           | ns                | rec    | ECs2746    | -         | CDS  |
| EDL933               | 2772354           | ns                | rec    | ECs2746    | -         | CDS  |
| EDL933               | 2774442           | i                 |        | intergenic |           |      |

| lineage <sup>a</sup> | site <sup>b</sup> | mutation          |        | gene            | Gene name | Type       |
|----------------------|-------------------|-------------------|--------|-----------------|-----------|------------|
|                      |                   | type <sup>c</sup> | recomb |                 |           |            |
| EDL933               | 2776138           | ns                |        | ECs2752         | -         | CDS        |
| EDL933               | 2783156           | ns                | rec    | ECs2766         | -         | CDS        |
| EDL933               | 2783160           | ns                | rec    | ECs2766         | -         | CDS        |
| EDL933               | 2783599           | ns                | rec    | ECs2767         | -         | CDS        |
| EDL933               | 2783613           | ns                | rec    | ECs2767         | -         | CDS        |
| EDL933               | 2783720           | i                 | rec    | intergenic      |           |            |
| EDL933               | 2783810           | i                 | rec    | intergenic      |           |            |
| EDL933               | 2784259           | ns                | rec    | ECs2768         | -         | CDS        |
| EDL933               | 2784411           | ns                | rec    | ECs2769         | -         | CDS        |
| EDL933               | 2784412           | ins               | rec    | ECs2769         | -         | CDS        |
| EDL933               | 2784445           | ns                | rec    | ECs2769         | -         | CDS        |
| EDL933               | 2784515           | ins               | rec    | intergenic      |           |            |
| EDL933               | 2785340           | ns                | rec    | ECs2770         | -         | CDS        |
| EDL933               | 2786266           | ns                | rec    | ECs2770         | -         | CDS        |
| EDL933               | 2786274           | ns                | rec    | ECs2770         | -         | CDS        |
| EDL933               | 2786278           | ns                | rec    | ECs2770         | -         | CDS        |
| EDL933               | 2786762           | ns                | rec    | ECs2770-2771    | -         | CDS        |
| EDL933               | 2786770           | ins               | rec    | ECs2770-2771    | -         | CDS        |
| EDL933               | 2786796           | ns                | rec    | ECs2771         | -         | CDS        |
| EDL933               | 2787097           | i                 | rec    | intergenic      |           |            |
| CB9615               | 2486675           | ns                | rec    | G2583_2483      | intU      | CDS        |
| CB9615               | 2486709           | i                 | rec    | intergenic      |           |            |
| CB9615               | 2486720           | i                 | rec    | intergenic      |           |            |
| CB9615               | 2486724           | i                 | rec    | intergenic      |           |            |
| CB9615               | 2486725           | i                 | rec    | intergenic      |           |            |
| CB9615               | 2489321           | nc                |        | G2583_2487      | yeeJ      | pseudogene |
| O157                 | 2717174           | s                 |        | G2583_2488      | -         | CDS        |
| EDL933               | 2793711           | s                 |        | G2583_2488      | -         | CDS        |
| Sakai                | 2717449           | ins               |        | G2583_2488      | -         | CDS        |
| CB9615               | 2495641           | s                 |        | G2583_2488      | -         | CDS        |
| O157                 | 2723059           | del               |        | intergenic      |           |            |
| O157                 | 2724885           | s                 |        | G2583_2491      | amn       | CDS        |
| O157                 | 2724930           | s                 |        | G2583_2491      | amn       | CDS        |
| O157                 | 2726331           | i                 |        | intergenic      |           |            |
| CB9615               | 2502116           | i                 |        | intergenic      |           |            |
| CB9615               | 2502580           | ns                |        | G2583_2494-2495 | yeeO      | CDS        |
| O157                 | 2728024           | ns                |        | G2583_2495      | yeeO      | CDS        |
| O157                 | 2728096           | ns                |        | G2583_2495      | yeeO      | CDS        |
| O157                 | 2729029           | ns                |        | G2583_2495      | yeeO      | CDS        |
| CB9615               | 2505411           | s                 |        | G2583_2498      | nac       | CDS        |
| O157                 | 2732519           | ns                |        | G2583_2500      | erfK      | CDS        |
| CB9615               | 2509919           | s                 |        | G2583_2503      | cobU      | CDS        |
| EDL933               | 2812486           | ns                |        | ECs2790         | -         | CDS        |
| O157                 | 2738154           | i                 |        | intergenic      |           |            |
| O157                 | 2738242           | i                 |        | intergenic      |           |            |

| lineage <sup>a</sup> | site <sup>b</sup> | mutation          |        | gene       | Gene name | Type       |
|----------------------|-------------------|-------------------|--------|------------|-----------|------------|
|                      |                   | type <sup>c</sup> | recomb |            |           |            |
| CB9615               | 2510715           | i                 |        | intergenic |           |            |
| O157                 | 2738596           | i                 |        | intergenic |           |            |
| EDL933               | 2815514           | ins               |        | intergenic |           |            |
| CB9615               | 2511537           | i                 |        | intergenic |           |            |
| CB9615               | 2511777           | ns                |        | G2583_2504 | yoeE      | CDS        |
| O157                 | 2740459           | s                 |        | G2583_2504 | yoeE      | CDS        |
| EDL933               | 2818757           | ns                | rec    | ECs2795    | -         | CDS        |
| EDL933               | 2818781           | ns                | rec    | ECs2795    | -         | CDS        |
| EDL933               | 2818793           | ns                | rec    | ECs2795    | -         | CDS        |
| EDL933               | 2818805           | ns                | rec    | ECs2795    | -         | CDS        |
| EDL933               | 2818838           | ns                | rec    | ECs2795    | -         | CDS        |
| CB9615               | 2523379           | ns                |        | G2583_2514 | -         | CDS        |
| CB9615               | 2524635           | ns                |        | G2583_2516 | -         | CDS        |
| Sakai                | 2745758           | ns                |        | G2583_2516 | -         | CDS        |
| O55/O157             | 2528100           | ns                | rec    | G2583_2520 | yafX      | CDS        |
| O55/O157             | 2528205           | ns                | rec    | G2583_2520 | yafX      | CDS        |
| O55/O157             | 2528220           | ns                | rec    | G2583_2520 | yafX      | CDS        |
| O55/O157             | 2528271           | ns                | rec    | G2583_2520 | yafX      | CDS        |
| O55/O157             | 2528322           | ns                | rec    | G2583_2520 | yafX      | CDS        |
| O55/O157             | 2528404           | ns                | rec    | G2583_2520 | yafX      | CDS        |
| CB9615               | 2530024           | nc                |        | G2583_2524 | yeeV1     | pseudogene |
| O157                 | 2750723           | i                 |        | intergenic |           |            |
| EDL933               | 2821100           | ins               |        | intergenic |           |            |
| O157                 | 2752965           | ns                |        | G2583_2528 | yeeA      | CDS        |
| CB9615               | 2533359           | ns                |        | G2583_2529 | sbmC      | CDS        |
| EDL933               | 2825288           | ins               |        | intergenic |           |            |
| O157                 | 2756165           | s                 |        | G2583_2531 | sbcB      | CDS        |
| CB9615               | 2536701           | ns                |        | G2583_2533 | yeeE      | CDS        |
| CB9615               | 2537453           | s                 |        | G2583_2533 | yeeE      | CDS        |
| EDL933               | 2828286           | i                 |        | intergenic |           |            |
| EDL933               | 2828290           | i                 |        | intergenic |           |            |
| O157                 | 2761240           | s                 | rec    | G2583_2536 | yeeZ      | CDS        |
| O157                 | 2761255           | s                 | rec    | G2583_2536 | yeeZ      | CDS        |
| O157                 | 2761258           | s                 | rec    | G2583_2536 | yeeZ      | CDS        |
| O157                 | 2761303           | s                 | rec    | G2583_2536 | yeeZ      | CDS        |
| O157                 | 2761318           | s                 | rec    | G2583_2536 | yeeZ      | CDS        |
| O157                 | 2761402           | s                 | rec    | G2583_2536 | yeeZ      | CDS        |
| O157                 | 2761968           | i                 | rec    | intergenic |           |            |
| O157                 | 2762084           | ns                | rec    | G2583_2539 | hisL      | CDS        |
| O157                 | 2762086           | ns                | rec    | G2583_2539 | hisL      | CDS        |
| O157                 | 2762191           | i                 | rec    | intergenic |           |            |
| O157                 | 2762319           | s                 | rec    | G2583_2540 | hisG      | CDS        |
| O157                 | 2762352           | s                 | rec    | G2583_2540 | hisG      | CDS        |
| O157                 | 2762442           | s                 | rec    | G2583_2540 | hisG      | CDS        |
| O157                 | 2762460           | s                 | rec    | G2583_2540 | hisG      | CDS        |



| lineage <sup>a</sup> | site <sup>b</sup> | mutation          |        | gene       | Gene name | Type |
|----------------------|-------------------|-------------------|--------|------------|-----------|------|
|                      |                   | type <sup>c</sup> | recomb |            |           |      |
| O157                 | 2762511           | s                 | rec    | G2583_2540 | hisG      | CDS  |
| O157                 | 2762529           | s                 | rec    | G2583_2540 | hisG      | CDS  |
| O157                 | 2762571           | s                 | rec    | G2583_2540 | hisG      | CDS  |
| O157                 | 2762598           | ns                | rec    | G2583_2540 | hisG      | CDS  |
| O157                 | 2762607           | s                 | rec    | G2583_2540 | hisG      | CDS  |
| O157                 | 2762613           | s                 | rec    | G2583_2540 | hisG      | CDS  |
| O157                 | 2762721           | s                 | rec    | G2583_2540 | hisG      | CDS  |
| O157                 | 2762748           | s                 | rec    | G2583_2540 | hisG      | CDS  |
| O157                 | 2762760           | s                 | rec    | G2583_2540 | hisG      | CDS  |
| O157                 | 2762793           | s                 | rec    | G2583_2540 | hisG      | CDS  |
| O157                 | 2762823           | s                 | rec    | G2583_2540 | hisG      | CDS  |
| O157                 | 2762844           | s                 | rec    | G2583_2540 | hisG      | CDS  |
| O157                 | 2762847           | s                 | rec    | G2583_2540 | hisG      | CDS  |
| O157                 | 2762871           | s                 | rec    | G2583_2540 | hisG      | CDS  |
| O157                 | 2762892           | s                 | rec    | G2583_2540 | hisG      | CDS  |
| O157                 | 2762916           | s                 | rec    | G2583_2540 | hisG      | CDS  |
| O157                 | 2762962           | ns                | rec    | G2583_2540 | hisG      | CDS  |
| O157                 | 2762967           | s                 | rec    | G2583_2540 | hisG      | CDS  |
| O157                 | 2763033           | s                 | rec    | G2583_2540 | hisG      | CDS  |
| O157                 | 2763039           | s                 | rec    | G2583_2540 | hisG      | CDS  |
| O157                 | 2763204           | ns                | rec    | G2583_2541 | hisD      | CDS  |
| O157                 | 2763286           | ns                | rec    | G2583_2541 | hisD      | CDS  |
| O157                 | 2763323           | s                 | rec    | G2583_2541 | hisD      | CDS  |
| O157                 | 2763356           | s                 | rec    | G2583_2541 | hisD      | CDS  |
| O157                 | 2763363           | ns                | rec    | G2583_2541 | hisD      | CDS  |
| O157                 | 2763390           | ns                | rec    | G2583_2541 | hisD      | CDS  |
| O157                 | 2763479           | s                 | rec    | G2583_2541 | hisD      | CDS  |
| O157                 | 2763506           | s                 | rec    | G2583_2541 | hisD      | CDS  |
| O157                 | 2763533           | s                 | rec    | G2583_2541 | hisD      | CDS  |
| O157                 | 2763542           | s                 | rec    | G2583_2541 | hisD      | CDS  |
| O157                 | 2763545           | s                 | rec    | G2583_2541 | hisD      | CDS  |
| O157                 | 2763599           | s                 | rec    | G2583_2541 | hisD      | CDS  |
| O157                 | 2763614           | s                 | rec    | G2583_2541 | hisD      | CDS  |
| O157                 | 2763636           | s                 | rec    | G2583_2541 | hisD      | CDS  |
| O157                 | 2763665           | s                 | rec    | G2583_2541 | hisD      | CDS  |
| O157                 | 2763668           | s                 | rec    | G2583_2541 | hisD      | CDS  |
| O157                 | 2763674           | s                 | rec    | G2583_2541 | hisD      | CDS  |
| O157                 | 2763692           | s                 | rec    | G2583_2541 | hisD      | CDS  |
| O157                 | 2763737           | s                 | rec    | G2583_2541 | hisD      | CDS  |
| O157                 | 2763764           | s                 | rec    | G2583_2541 | hisD      | CDS  |
| O157                 | 2763788           | s                 | rec    | G2583_2541 | hisD      | CDS  |
| O157                 | 2763791           | s                 | rec    | G2583_2541 | hisD      | CDS  |
| O157                 | 2763809           | s                 | rec    | G2583_2541 | hisD      | CDS  |
| O157                 | 2763818           | s                 | rec    | G2583_2541 | hisD      | CDS  |
| O157                 | 2763824           | s                 | rec    | G2583_2541 | hisD      | CDS  |

| lineage <sup>a</sup> | site <sup>b</sup> | mutation          |        | gene       | Gene name | Type |
|----------------------|-------------------|-------------------|--------|------------|-----------|------|
|                      |                   | type <sup>c</sup> | recomb |            |           |      |
| O157                 | 2763879           | s                 | rec    | G2583_2541 | hisD      | CDS  |
| O157                 | 2763899           | s                 | rec    | G2583_2541 | hisD      | CDS  |
| O157                 | 2763902           | s                 | rec    | G2583_2541 | hisD      | CDS  |
| O157                 | 2763908           | s                 | rec    | G2583_2541 | hisD      | CDS  |
| O157                 | 2763932           | s                 | rec    | G2583_2541 | hisD      | CDS  |
| O157                 | 2763935           | s                 | rec    | G2583_2541 | hisD      | CDS  |
| O157                 | 2763959           | s                 | rec    | G2583_2541 | hisD      | CDS  |
| O157                 | 2763977           | s                 | rec    | G2583_2541 | hisD      | CDS  |
| O157                 | 2763980           | s                 | rec    | G2583_2541 | hisD      | CDS  |
| O157                 | 2763982           | ns                | rec    | G2583_2541 | hisD      | CDS  |
| O157                 | 2763983           | ns                | rec    | G2583_2541 | hisD      | CDS  |
| O157                 | 2763997           | ns                | rec    | G2583_2541 | hisD      | CDS  |
| O157                 | 2763999           | ns                | rec    | G2583_2541 | hisD      | CDS  |
| O157                 | 2764000           | ns                | rec    | G2583_2541 | hisD      | CDS  |
| O157                 | 2764001           | ns                | rec    | G2583_2541 | hisD      | CDS  |
| O157                 | 2764004           | s                 | rec    | G2583_2541 | hisD      | CDS  |
| O157                 | 2764013           | s                 | rec    | G2583_2541 | hisD      | CDS  |
| O157                 | 2764028           | s                 | rec    | G2583_2541 | hisD      | CDS  |
| O157                 | 2764034           | s                 | rec    | G2583_2541 | hisD      | CDS  |
| O157                 | 2764058           | s                 | rec    | G2583_2541 | hisD      | CDS  |
| O157                 | 2764069           | ns                | rec    | G2583_2541 | hisD      | CDS  |
| O157                 | 2764079           | s                 | rec    | G2583_2541 | hisD      | CDS  |
| O157                 | 2764112           | s                 | rec    | G2583_2541 | hisD      | CDS  |
| O157                 | 2764151           | s                 | rec    | G2583_2541 | hisD      | CDS  |
| O157                 | 2764172           | ns                | rec    | G2583_2541 | hisD      | CDS  |
| O157                 | 2764226           | s                 | rec    | G2583_2541 | hisD      | CDS  |
| O157                 | 2764235           | s                 | rec    | G2583_2541 | hisD      | CDS  |
| O157                 | 2764253           | s                 | rec    | G2583_2541 | hisD      | CDS  |
| O157                 | 2764262           | s                 | rec    | G2583_2541 | hisD      | CDS  |
| O157                 | 2764265           | s                 | rec    | G2583_2541 | hisD      | CDS  |
| O157                 | 2764268           | s                 | rec    | G2583_2541 | hisD      | CDS  |
| O157                 | 2764280           | s                 | rec    | G2583_2541 | hisD      | CDS  |
| O157                 | 2764307           | s                 | rec    | G2583_2541 | hisD      | CDS  |
| O157                 | 2764313           | s                 | rec    | G2583_2541 | hisD      | CDS  |
| O157                 | 2764328           | s                 | rec    | G2583_2541 | hisD      | CDS  |
| O157                 | 2764354           | ns                | rec    | G2583_2541 | hisD      | CDS  |
| O157                 | 2764366           | ns                | rec    | G2583_2541 | hisD      | CDS  |
| O157                 | 2764382           | s                 | rec    | G2583_2541 | hisD      | CDS  |
| O157                 | 2764418           | s                 | rec    | G2583_2541 | hisD      | CDS  |
| O157                 | 2764549           | s                 | rec    | G2583_2542 | hisC      | CDS  |
| O157                 | 2764579           | s                 | rec    | G2583_2542 | hisC      | CDS  |
| O157                 | 2764586           | ns                | rec    | G2583_2542 | hisC      | CDS  |
| O157                 | 2764636           | s                 | rec    | G2583_2542 | hisC      | CDS  |
| O157                 | 2764669           | s                 | rec    | G2583_2542 | hisC      | CDS  |
| O157                 | 2764690           | s                 | rec    | G2583_2542 | hisC      | CDS  |

| lineage <sup>a</sup> | site <sup>b</sup> | mutation          |        | gene       | Gene name | Type |
|----------------------|-------------------|-------------------|--------|------------|-----------|------|
|                      |                   | type <sup>c</sup> | recomb |            |           |      |
| O157                 | 2764756           | s                 | rec    | G2583_2542 | hisC      | CDS  |
| O157                 | 2764839           | ns                | rec    | G2583_2542 | hisC      | CDS  |
| O157                 | 2764855           | ns                | rec    | G2583_2542 | hisC      | CDS  |
| O157                 | 2764873           | s                 | rec    | G2583_2542 | hisC      | CDS  |
| O157                 | 2764936           | s                 | rec    | G2583_2542 | hisC      | CDS  |
| O157                 | 2764987           | s                 | rec    | G2583_2542 | hisC      | CDS  |
| O157                 | 2765005           | s                 | rec    | G2583_2542 | hisC      | CDS  |
| O157                 | 2765026           | s                 | rec    | G2583_2542 | hisC      | CDS  |
| O157                 | 2765038           | s                 | rec    | G2583_2542 | hisC      | CDS  |
| O157                 | 2765063           | ns                | rec    | G2583_2542 | hisC      | CDS  |
| O157                 | 2765131           | s                 | rec    | G2583_2542 | hisC      | CDS  |
| O157                 | 2765134           | s                 | rec    | G2583_2542 | hisC      | CDS  |
| O157                 | 2765168           | s                 | rec    | G2583_2542 | hisC      | CDS  |
| O157                 | 2765182           | s                 | rec    | G2583_2542 | hisC      | CDS  |
| O157                 | 2765245           | s                 | rec    | G2583_2542 | hisC      | CDS  |
| O157                 | 2765248           | s                 | rec    | G2583_2542 | hisC      | CDS  |
| O157                 | 2765249           | ns                | rec    | G2583_2542 | hisC      | CDS  |
| O157                 | 2765269           | s                 | rec    | G2583_2542 | hisC      | CDS  |
| O157                 | 2765342           | ns                | rec    | G2583_2542 | hisC      | CDS  |
| O157                 | 2765386           | s                 | rec    | G2583_2542 | hisC      | CDS  |
| O157                 | 2765532           | s                 | rec    | G2583_2542 | hisC      | CDS  |
| O157                 | 2765607           | s                 | rec    | G2583_2543 | hisB      | CDS  |
| O157                 | 2765647           | ns                | rec    | G2583_2543 | hisB      | CDS  |
| O157                 | 2765649           | ns                | rec    | G2583_2543 | hisB      | CDS  |
| O157                 | 2765679           | s                 | rec    | G2583_2543 | hisB      | CDS  |
| O157                 | 2765694           | s                 | rec    | G2583_2543 | hisB      | CDS  |
| O157                 | 2765700           | s                 | rec    | G2583_2543 | hisB      | CDS  |
| O157                 | 2765709           | s                 | rec    | G2583_2543 | hisB      | CDS  |
| O157                 | 2765739           | s                 | rec    | G2583_2543 | hisB      | CDS  |
| O157                 | 2765769           | s                 | rec    | G2583_2543 | hisB      | CDS  |
| O157                 | 2765787           | s                 | rec    | G2583_2543 | hisB      | CDS  |
| O157                 | 2765847           | s                 | rec    | G2583_2543 | hisB      | CDS  |
| O157                 | 2765898           | s                 | rec    | G2583_2543 | hisB      | CDS  |
| O157                 | 2765904           | s                 | rec    | G2583_2543 | hisB      | CDS  |
| O157                 | 2765940           | s                 | rec    | G2583_2543 | hisB      | CDS  |
| O157                 | 2765943           | s                 | rec    | G2583_2543 | hisB      | CDS  |
| O157                 | 2765946           | s                 | rec    | G2583_2543 | hisB      | CDS  |
| O157                 | 2765976           | s                 | rec    | G2583_2543 | hisB      | CDS  |
| O157                 | 2766015           | s                 | rec    | G2583_2543 | hisB      | CDS  |
| O157                 | 2766021           | s                 | rec    | G2583_2543 | hisB      | CDS  |
| O157                 | 2766023           | ns                | rec    | G2583_2543 | hisB      | CDS  |
| O157                 | 2766027           | s                 | rec    | G2583_2543 | hisB      | CDS  |
| O157                 | 2766039           | s                 | rec    | G2583_2543 | hisB      | CDS  |
| O157                 | 2766042           | s                 | rec    | G2583_2543 | hisB      | CDS  |
| O157                 | 2766051           | s                 | rec    | G2583_2543 | hisB      | CDS  |

| lineage <sup>a</sup> | site <sup>b</sup> | mutation          |        | gene       | Gene name | Type |
|----------------------|-------------------|-------------------|--------|------------|-----------|------|
|                      |                   | type <sup>c</sup> | recomb |            |           |      |
| O157                 | 2766054           | s                 | rec    | G2583_2543 | hisB      | CDS  |
| O157                 | 2766069           | s                 | rec    | G2583_2543 | hisB      | CDS  |
| O157                 | 2766078           | s                 | rec    | G2583_2543 | hisB      | CDS  |
| O157                 | 2766096           | s                 | rec    | G2583_2543 | hisB      | CDS  |
| O157                 | 2766117           | s                 | rec    | G2583_2543 | hisB      | CDS  |
| O157                 | 2766177           | s                 | rec    | G2583_2543 | hisB      | CDS  |
| O157                 | 2766294           | s                 | rec    | G2583_2543 | hisB      | CDS  |
| O157                 | 2766312           | s                 | rec    | G2583_2543 | hisB      | CDS  |
| O157                 | 2766339           | s                 | rec    | G2583_2543 | hisB      | CDS  |
| O157                 | 2766342           | s                 | rec    | G2583_2543 | hisB      | CDS  |
| O157                 | 2766378           | s                 | rec    | G2583_2543 | hisB      | CDS  |
| O157                 | 2766384           | s                 | rec    | G2583_2543 | hisB      | CDS  |
| O157                 | 2766396           | s                 | rec    | G2583_2543 | hisB      | CDS  |
| O157                 | 2766420           | s                 | rec    | G2583_2543 | hisB      | CDS  |
| O157                 | 2766450           | s                 | rec    | G2583_2543 | hisB      | CDS  |
| O157                 | 2766468           | s                 | rec    | G2583_2543 | hisB      | CDS  |
| O157                 | 2766471           | s                 | rec    | G2583_2543 | hisB      | CDS  |
| O157                 | 2766501           | s                 | rec    | G2583_2543 | hisB      | CDS  |
| O157                 | 2766528           | s                 | rec    | G2583_2543 | hisB      | CDS  |
| O157                 | 2766537           | s                 | rec    | G2583_2543 | hisB      | CDS  |
| O157                 | 2766619           | ns                | rec    | G2583_2544 | hisH      | CDS  |
| O157                 | 2766665           | s                 | rec    | G2583_2544 | hisH      | CDS  |
| O157                 | 2766704           | s                 | rec    | G2583_2544 | hisH      | CDS  |
| O157                 | 2766848           | s                 | rec    | G2583_2544 | hisH      | CDS  |
| O157                 | 2766860           | s                 | rec    | G2583_2544 | hisH      | CDS  |
| O157                 | 2766881           | s                 | rec    | G2583_2544 | hisH      | CDS  |
| O157                 | 2766896           | s                 | rec    | G2583_2544 | hisH      | CDS  |
| O157                 | 2766956           | s                 | rec    | G2583_2544 | hisH      | CDS  |
| O157                 | 2767004           | s                 | rec    | G2583_2544 | hisH      | CDS  |
| O157                 | 2767068           | ns                | rec    | G2583_2544 | hisH      | CDS  |
| O157                 | 2767085           | s                 | rec    | G2583_2544 | hisH      | CDS  |
| O157                 | 2767091           | s                 | rec    | G2583_2544 | hisH      | CDS  |
| O157                 | 2767133           | s                 | rec    | G2583_2544 | hisH      | CDS  |
| O157                 | 2767216           | s                 | rec    | G2583_2545 | hisA      | CDS  |
| O157                 | 2767225           | s                 | rec    | G2583_2545 | hisA      | CDS  |
| O157                 | 2767252           | s                 | rec    | G2583_2545 | hisA      | CDS  |
| O157                 | 2767288           | s                 | rec    | G2583_2545 | hisA      | CDS  |
| O157                 | 2767306           | s                 | rec    | G2583_2545 | hisA      | CDS  |
| O157                 | 2767309           | s                 | rec    | G2583_2545 | hisA      | CDS  |
| O157                 | 2767325           | s                 | rec    | G2583_2545 | hisA      | CDS  |
| O157                 | 2767331           | s                 | rec    | G2583_2545 | hisA      | CDS  |
| O157                 | 2767399           | s                 | rec    | G2583_2545 | hisA      | CDS  |
| O157                 | 2767432           | s                 | rec    | G2583_2545 | hisA      | CDS  |
| O157                 | 2767471           | s                 | rec    | G2583_2545 | hisA      | CDS  |
| O157                 | 2767474           | s                 | rec    | G2583_2545 | hisA      | CDS  |

| lineage <sup>a</sup> | site <sup>b</sup> | mutation          |        | gene            | Gene name | Type |
|----------------------|-------------------|-------------------|--------|-----------------|-----------|------|
|                      |                   | type <sup>c</sup> | recomb |                 |           |      |
| O157                 | 2767501           | s                 | rec    | G2583_2545      | hisA      | CDS  |
| O157                 | 2767521           | ns                | rec    | G2583_2545      | hisA      | CDS  |
| O157                 | 2767543           | s                 | rec    | G2583_2545      | hisA      | CDS  |
| O157                 | 2767642           | s                 | rec    | G2583_2545      | hisA      | CDS  |
| O157                 | 2767771           | s                 | rec    | G2583_2545      | hisA      | CDS  |
| O157                 | 2767792           | s                 | rec    | G2583_2545      | hisA      | CDS  |
| O157                 | 2767801           | s                 | rec    | G2583_2545      | hisA      | CDS  |
| O157                 | 2767907           | ns                | rec    | G2583_2545      | hisA      | CDS  |
| O157                 | 2767923           | ns                | rec    | G2583_2545-2546 | hisAF     | CDS  |
| O157                 | 2767932           | s                 | rec    | G2583_2546      | hisF      | CDS  |
| O157                 | 2767947           | s                 | rec    | G2583_2546      | hisF      | CDS  |
| O157                 | 2767962           | s                 | rec    | G2583_2546      | hisF      | CDS  |
| O157                 | 2768004           | s                 | rec    | G2583_2546      | hisF      | CDS  |
| O157                 | 2768007           | s                 | rec    | G2583_2546      | hisF      | CDS  |
| O157                 | 2768028           | s                 | rec    | G2583_2546      | hisF      | CDS  |
| O157                 | 2768031           | s                 | rec    | G2583_2546      | hisF      | CDS  |
| O157                 | 2768100           | s                 | rec    | G2583_2546      | hisF      | CDS  |
| O157                 | 2768124           | s                 | rec    | G2583_2546      | hisF      | CDS  |
| O157                 | 2768139           | s                 | rec    | G2583_2546      | hisF      | CDS  |
| O157                 | 2768142           | s                 | rec    | G2583_2546      | hisF      | CDS  |
| O157                 | 2768220           | s                 | rec    | G2583_2546      | hisF      | CDS  |
| O157                 | 2768235           | s                 | rec    | G2583_2546      | hisF      | CDS  |
| O157                 | 2768265           | s                 | rec    | G2583_2546      | hisF      | CDS  |
| O157                 | 2768292           | s                 | rec    | G2583_2546      | hisF      | CDS  |
| O157                 | 2768311           | ns                | rec    | G2583_2546      | hisF      | CDS  |
| O157                 | 2768520           | s                 | rec    | G2583_2546      | hisF      | CDS  |
| O157                 | 2768526           | s                 | rec    | G2583_2546      | hisF      | CDS  |
| O157                 | 2768565           | s                 | rec    | G2583_2546      | hisF      | CDS  |
| O157                 | 2768589           | s                 | rec    | G2583_2546      | hisF      | CDS  |
| O157                 | 2768723           | s                 | rec    | G2583_2547      | hisI      | CDS  |
| O157                 | 2768732           | s                 | rec    | G2583_2547      | hisI      | CDS  |
| O157                 | 2768765           | s                 | rec    | G2583_2547      | hisI      | CDS  |
| O157                 | 2768807           | s                 | rec    | G2583_2547      | hisI      | CDS  |
| O157                 | 2768910           | ns                | rec    | G2583_2547      | hisI      | CDS  |
| O157                 | 2768934           | s                 | rec    | G2583_2547      | hisI      | CDS  |
| O157                 | 2768940           | ns                | rec    | G2583_2547      | hisI      | CDS  |
| O157                 | 2768942           | ns                | rec    | G2583_2547      | hisI      | CDS  |
| O157                 | 2768954           | s                 | rec    | G2583_2547      | hisI      | CDS  |
| O157                 | 2768960           | s                 | rec    | G2583_2547      | hisI      | CDS  |
| O157                 | 2768963           | s                 | rec    | G2583_2547      | hisI      | CDS  |
| O157                 | 2769003           | ns                | rec    | G2583_2547      | hisI      | CDS  |
| O157                 | 2769023           | s                 | rec    | G2583_2547      | hisI      | CDS  |
| O157                 | 2769039           | s                 | rec    | G2583_2547      | hisI      | CDS  |
| O157                 | 2769074           | s                 | rec    | G2583_2547      | hisI      | CDS  |
| O157                 | 2769077           | s                 | rec    | G2583_2547      | hisI      | CDS  |

| lineage <sup>a</sup> | site <sup>b</sup> | mutation          |        | gene       | Gene name | Type |
|----------------------|-------------------|-------------------|--------|------------|-----------|------|
|                      |                   | type <sup>c</sup> | recomb |            |           |      |
| O157                 | 2769164           | s                 | rec    | G2583_2547 | hisI      | CDS  |
| O157                 | 2769197           | s                 | rec    | G2583_2547 | hisI      | CDS  |
| O157                 | 2769203           | s                 | rec    | G2583_2547 | hisI      | CDS  |
| O157                 | 2769219           | s                 | rec    | G2583_2547 | hisI      | CDS  |
| O157                 | 2769224           | s                 | rec    | G2583_2547 | hisI      | CDS  |
| O157                 | 2769225           | s                 | rec    | G2583_2547 | hisI      | CDS  |
| O157                 | 2769241           | ns                | rec    | G2583_2547 | hisI      | CDS  |
| O157                 | 2769242           | ns                | rec    | G2583_2547 | hisI      | CDS  |
| O157                 | 2769254           | s                 | rec    | G2583_2547 | hisI      | CDS  |
| O157                 | 2769281           | s                 | rec    | G2583_2547 | hisI      | CDS  |
| O157                 | 2769299           | i                 | rec    | intergenic |           |      |
| O157                 | 2769314           | i                 | rec    | intergenic |           |      |
| O157                 | 2769319           | i                 | rec    | intergenic |           |      |
| O157                 | 2769351           | i                 | rec    | intergenic |           |      |
| O157                 | 2769365           | i                 | rec    | intergenic |           |      |
| O157                 | 2769414           | s                 | rec    | G2583_2548 | cld       | CDS  |
| O157                 | 2769425           | s                 | rec    | G2583_2548 | cld       | CDS  |
| O157                 | 2769492           | s                 | rec    | G2583_2548 | cld       | CDS  |
| O157                 | 2769531           | s                 | rec    | G2583_2548 | cld       | CDS  |
| O157                 | 2769561           | s                 | rec    | G2583_2548 | cld       | CDS  |
| O157                 | 2769568           | ns                | rec    | G2583_2548 | cld       | CDS  |
| O157                 | 2769573           | s                 | rec    | G2583_2548 | cld       | CDS  |
| O157                 | 2769581           | s                 | rec    | G2583_2548 | cld       | CDS  |
| O157                 | 2769594           | s                 | rec    | G2583_2548 | cld       | CDS  |
| O157                 | 2769696           | ns                | rec    | G2583_2548 | cld       | CDS  |
| O157                 | 2769698           | ns                | rec    | G2583_2548 | cld       | CDS  |
| O157                 | 2769703           | del-3             | rec    | G2583_2548 | cld       | CDS  |
| O157                 | 2769711           | s                 | rec    | G2583_2548 | cld       | CDS  |
| O157                 | 2769716           | ns                | rec    | G2583_2548 | cld       | CDS  |
| O157                 | 2769717           | s                 | rec    | G2583_2548 | cld       | CDS  |
| O157                 | 2769720           | s                 | rec    | G2583_2548 | cld       | CDS  |
| O157                 | 2769723           | s                 | rec    | G2583_2548 | cld       | CDS  |
| O157                 | 2769728           | ns                | rec    | G2583_2548 | cld       | CDS  |
| O157                 | 2769783           | ns                | rec    | G2583_2548 | cld       | CDS  |
| O157                 | 2769804           | s                 | rec    | G2583_2548 | cld       | CDS  |
| O157                 | 2769856           | ns                | rec    | G2583_2548 | cld       | CDS  |
| O157                 | 2770053           | s                 | rec    | G2583_2548 | cld       | CDS  |
| O157                 | 2770080           | s                 | rec    | G2583_2548 | cld       | CDS  |
| O157                 | 2770092           | s                 | rec    | G2583_2548 | cld       | CDS  |
| O157                 | 2770136           | ns                | rec    | G2583_2548 | cld       | CDS  |
| O157                 | 2770161           | s                 | rec    | G2583_2548 | cld       | CDS  |
| O157                 | 2770224           | s                 | rec    | G2583_2548 | cld       | CDS  |
| O157                 | 2770236           | s                 | rec    | G2583_2548 | cld       | CDS  |
| O157                 | 2770322           | ns                | rec    | G2583_2548 | cld       | CDS  |
| O157                 | 2770377           | s                 | rec    | G2583_2548 | cld       | CDS  |

| lineage <sup>a</sup> | site <sup>b</sup> | mutation          |        | gene       | Gene name | Type |
|----------------------|-------------------|-------------------|--------|------------|-----------|------|
|                      |                   | type <sup>c</sup> | recomb |            |           |      |
| O157                 | 2770382           | ns                | rec    | G2583_2548 | clb       | CDS  |
| O157                 | 2770384           | del               | rec    | G2583_2548 | clb       | CDS  |
| O157                 | 2770386           | ns                | rec    | G2583_2548 | clb       | CDS  |
| O157                 | 2770389           | ns                | rec    | G2583_2548 | clb       | CDS  |
| O157                 | 2770390           | ns                | rec    | G2583_2548 | clb       | CDS  |
| O157                 | 2770396           | ns                | rec    | G2583_2548 | clb       | CDS  |
| O157                 | 2770397           | ns                | rec    | G2583_2548 | clb       | CDS  |
| O157                 | 2770416           | ns                | rec    | G2583_2548 | clb       | CDS  |
| O157                 | 2770418           | ns                | rec    | G2583_2548 | clb       | CDS  |
| O157                 | 2770419           | ns                | rec    | G2583_2548 | clb       | CDS  |
| O157                 | 2770437           | i                 | rec    | intergenic |           |      |
| O157                 | 2770459           | i                 | rec    | intergenic |           |      |
| O157                 | 2770461           | i                 | rec    | intergenic |           |      |
| O157                 | 2770462           | i                 | rec    | intergenic |           |      |
| O157                 | 2770466           | i                 | rec    | intergenic |           |      |
| O157                 | 2770471           | i                 | rec    | intergenic |           |      |
| O157                 | 2770476           | i                 | rec    | intergenic |           |      |
| O157                 | 2770487           | i                 | rec    | intergenic |           |      |
| O157                 | 2770492           | i                 | rec    | intergenic |           |      |
| O157                 | 2770505           | i                 | rec    | intergenic |           |      |
| O157                 | 2770516           | s                 | rec    | G2583_2549 | ugd       | CDS  |
| O157                 | 2770540           | s                 | rec    | G2583_2549 | ugd       | CDS  |
| O157                 | 2770558           | ns                | rec    | G2583_2549 | ugd       | CDS  |
| O157                 | 2770651           | s                 | rec    | G2583_2549 | ugd       | CDS  |
| O157                 | 2770681           | s                 | rec    | G2583_2549 | ugd       | CDS  |
| O157                 | 2770690           | s                 | rec    | G2583_2549 | ugd       | CDS  |
| O157                 | 2770708           | s                 | rec    | G2583_2549 | ugd       | CDS  |
| O157                 | 2770780           | s                 | rec    | G2583_2549 | ugd       | CDS  |
| O157                 | 2770792           | s                 | rec    | G2583_2549 | ugd       | CDS  |
| O157                 | 2770825           | s                 | rec    | G2583_2549 | ugd       | CDS  |
| O157                 | 2770840           | s                 | rec    | G2583_2549 | ugd       | CDS  |
| O157                 | 2770882           | s                 | rec    | G2583_2549 | ugd       | CDS  |
| O157                 | 2770918           | s                 | rec    | G2583_2549 | ugd       | CDS  |
| O157                 | 2770945           | s                 | rec    | G2583_2549 | ugd       | CDS  |
| O157                 | 2770969           | s                 | rec    | G2583_2549 | ugd       | CDS  |
| O157                 | 2770972           | s                 | rec    | G2583_2549 | ugd       | CDS  |
| O157                 | 2770993           | s                 | rec    | G2583_2549 | ugd       | CDS  |
| O157                 | 2770996           | s                 | rec    | G2583_2549 | ugd       | CDS  |
| O157                 | 2770999           | s                 | rec    | G2583_2549 | ugd       | CDS  |
| O157                 | 2771002           | ns                | rec    | G2583_2549 | ugd       | CDS  |
| O157                 | 2771004           | ns                | rec    | G2583_2549 | ugd       | CDS  |
| O157                 | 2771050           | s                 | rec    | G2583_2549 | ugd       | CDS  |
| O157                 | 2771065           | s                 | rec    | G2583_2549 | ugd       | CDS  |
| O157                 | 2771104           | s                 | rec    | G2583_2549 | ugd       | CDS  |
| O157                 | 2771107           | s                 | rec    | G2583_2549 | ugd       | CDS  |

| lineage <sup>a</sup> | site <sup>b</sup> | mutation          |        | gene       | Gene name | Type |
|----------------------|-------------------|-------------------|--------|------------|-----------|------|
|                      |                   | type <sup>c</sup> | recomb |            |           |      |
| O157                 | 2771110           | s                 | rec    | G2583_2549 | ugd       | CDS  |
| O157                 | 2771116           | s                 | rec    | G2583_2549 | ugd       | CDS  |
| O157                 | 2771125           | s                 | rec    | G2583_2549 | ugd       | CDS  |
| O157                 | 2771158           | s                 | rec    | G2583_2549 | ugd       | CDS  |
| O157                 | 2771185           | s                 | rec    | G2583_2549 | ugd       | CDS  |
| O157                 | 2771200           | s                 | rec    | G2583_2549 | ugd       | CDS  |
| O157                 | 2771212           | s                 | rec    | G2583_2549 | ugd       | CDS  |
| O157                 | 2771218           | s                 | rec    | G2583_2549 | ugd       | CDS  |
| O157                 | 2771221           | s                 | rec    | G2583_2549 | ugd       | CDS  |
| O157                 | 2771233           | s                 | rec    | G2583_2549 | ugd       | CDS  |
| O157                 | 2771245           | s                 | rec    | G2583_2549 | ugd       | CDS  |
| O157                 | 2771617           | s                 | rec    | G2583_2549 | ugd       | CDS  |
| O157                 | 2771638           | s                 | rec    | G2583_2549 | ugd       | CDS  |
| O157                 | 2771722           | i                 | rec    | intergenic |           |      |
| O157                 | 2771776           | i                 | rec    | intergenic |           |      |
| O157                 | 2771805           | i                 | rec    | intergenic |           |      |
| O157                 | 2771806           | i                 | rec    | intergenic |           |      |
| O157                 | 2771838           | i                 | rec    | intergenic |           |      |
| O157                 | 2771843           | i                 | rec    | intergenic |           |      |
| O157                 | 2771851           | i                 | rec    | intergenic |           |      |
| O157                 | 2771870           | i                 | rec    | intergenic |           |      |
| EDL933               | 2844710           | ns                |        | ECs2833    | -         | CDS  |
| EDL933               | 2845009           | ins               |        | intergenic |           |      |
| O157                 | 2787598           | ns                | rec    | G2583_2564 | galF      | CDS  |
| O157                 | 2787599           | ns                | rec    | G2583_2564 | galF      | CDS  |
| O157                 | 2787600           | ns                | rec    | G2583_2564 | galF      | CDS  |
| O157                 | 2787601           | ns                | rec    | G2583_2564 | galF      | CDS  |
| O157                 | 2787604           | s                 | rec    | G2583_2564 | galF      | CDS  |
| O157                 | 2787605           | s                 | rec    | G2583_2564 | galF      | CDS  |
| O157                 | 2787607           | s                 | rec    | G2583_2564 | galF      | CDS  |
| O157                 | 2787608           | ns                | rec    | G2583_2564 | galF      | CDS  |
| O157                 | 2787610           | ns                | rec    | G2583_2564 | galF      | CDS  |
| O157                 | 2787614           | s                 | rec    | G2583_2564 | galF      | CDS  |
| O157                 | 2787618           | ns                | rec    | G2583_2564 | galF      | CDS  |
| O157                 | 2787619           | ns                | rec    | G2583_2564 | galF      | CDS  |
| O157                 | 2787620           | s                 | rec    | G2583_2564 | galF      | CDS  |
| O157                 | 2787624           | ns                | rec    | G2583_2564 | galF      | CDS  |
| O157                 | 2787626           | s                 | rec    | G2583_2564 | galF      | CDS  |
| O157                 | 2787629           | s                 | rec    | G2583_2564 | galF      | CDS  |
| O157                 | 2787635           | s                 | rec    | G2583_2564 | galF      | CDS  |
| O157                 | 2787641           | s                 | rec    | G2583_2564 | galF      | CDS  |
| O157                 | 2787644           | s                 | rec    | G2583_2564 | galF      | CDS  |
| O157                 | 2787646           | s                 | rec    | G2583_2564 | galF      | CDS  |
| O157                 | 2787653           | s                 | rec    | G2583_2564 | galF      | CDS  |
| O157                 | 2787656           | s                 | rec    | G2583_2564 | galF      | CDS  |



| lineage <sup>a</sup> | site <sup>b</sup> | mutation          |        | gene       | Gene name | Type |
|----------------------|-------------------|-------------------|--------|------------|-----------|------|
|                      |                   | type <sup>c</sup> | recomb |            |           |      |
| O157                 | 2787668           | s                 | rec    | G2583_2564 | galF      | CDS  |
| O157                 | 2787698           | s                 | rec    | G2583_2564 | galF      | CDS  |
| O157                 | 2787707           | s                 | rec    | G2583_2564 | galF      | CDS  |
| O157                 | 2787713           | s                 | rec    | G2583_2564 | galF      | CDS  |
| O157                 | 2787728           | s                 | rec    | G2583_2564 | galF      | CDS  |
| O157                 | 2787740           | s                 | rec    | G2583_2564 | galF      | CDS  |
| O157                 | 2787749           | s                 | rec    | G2583_2564 | galF      | CDS  |
| O157                 | 2787755           | s                 | rec    | G2583_2564 | galF      | CDS  |
| O157                 | 2787758           | s                 | rec    | G2583_2564 | galF      | CDS  |
| O157                 | 2787764           | s                 | rec    | G2583_2564 | galF      | CDS  |
| O157                 | 2787785           | s                 | rec    | G2583_2564 | galF      | CDS  |
| O157                 | 2787800           | s                 | rec    | G2583_2564 | galF      | CDS  |
| O157                 | 2787806           | s                 | rec    | G2583_2564 | galF      | CDS  |
| O157                 | 2787812           | s                 | rec    | G2583_2564 | galF      | CDS  |
| O157                 | 2787845           | s                 | rec    | G2583_2564 | galF      | CDS  |
| O157                 | 2787860           | s                 | rec    | G2583_2564 | galF      | CDS  |
| O157                 | 2787893           | s                 | rec    | G2583_2564 | galF      | CDS  |
| O157                 | 2787926           | s                 | rec    | G2583_2564 | galF      | CDS  |
| O157                 | 2787980           | s                 | rec    | G2583_2564 | galF      | CDS  |
| O157                 | 2788010           | s                 | rec    | G2583_2564 | galF      | CDS  |
| O157                 | 2788013           | s                 | rec    | G2583_2564 | galF      | CDS  |
| O157                 | 2788055           | s                 | rec    | G2583_2564 | galF      | CDS  |
| O157                 | 2788058           | s                 | rec    | G2583_2564 | galF      | CDS  |
| O157                 | 2788060           | s                 | rec    | G2583_2564 | galF      | CDS  |
| O157                 | 2788705           | ins               | rec    | intergenic |           |      |
| O157                 | 2789221           | s                 | rec    | G2583_2565 | gne       | CDS  |
| O157                 | 2789254           | s                 | rec    | G2583_2565 | gne       | CDS  |
| O157                 | 2789308           | s                 | rec    | G2583_2565 | gne       | CDS  |
| O157                 | 2789320           | s                 | rec    | G2583_2565 | gne       | CDS  |
| O157                 | 2789344           | s                 | rec    | G2583_2565 | gne       | CDS  |
| O157                 | 2789530           | s                 | rec    | G2583_2565 | gne       | CDS  |
| O157                 | 2789969           | s                 | rec    | G2583_2566 | wcaM      | CDS  |
| O157                 | 2789973           | ns                | rec    | G2583_2566 | wcaM      | CDS  |
| O157                 | 2789975           | s                 | rec    | G2583_2566 | wcaM      | CDS  |
| O157                 | 2790019           | ns                | rec    | G2583_2566 | wcaM      | CDS  |
| O157                 | 2790032           | s                 | rec    | G2583_2566 | wcaM      | CDS  |
| O157                 | 2790038           | s                 | rec    | G2583_2566 | wcaM      | CDS  |
| O157                 | 2790068           | ns                | rec    | G2583_2566 | wcaM      | CDS  |
| O157                 | 2790069           | ns                | rec    | G2583_2566 | wcaM      | CDS  |
| O157                 | 2790086           | s                 | rec    | G2583_2566 | wcaM      | CDS  |
| O157                 | 2790104           | s                 | rec    | G2583_2566 | wcaM      | CDS  |
| O157                 | 2790113           | s                 | rec    | G2583_2566 | wcaM      | CDS  |
| O157                 | 2790118           | ns                | rec    | G2583_2566 | wcaM      | CDS  |
| O157                 | 2790145           | s                 | rec    | G2583_2566 | wcaM      | CDS  |
| O157                 | 2790149           | s                 | rec    | G2583_2566 | wcaM      | CDS  |

| lineage <sup>a</sup> | site <sup>b</sup> | mutation          |        | gene       | Gene name | Type |
|----------------------|-------------------|-------------------|--------|------------|-----------|------|
|                      |                   | type <sup>c</sup> | recomb |            |           |      |
| O157                 | 2790155           | s                 | rec    | G2583_2566 | wcaM      | CDS  |
| O157                 | 2790179           | s                 | rec    | G2583_2566 | wcaM      | CDS  |
| O157                 | 2790182           | s                 | rec    | G2583_2566 | wcaM      | CDS  |
| O157                 | 2790197           | s                 | rec    | G2583_2566 | wcaM      | CDS  |
| O157                 | 2790209           | s                 | rec    | G2583_2566 | wcaM      | CDS  |
| O157                 | 2790220           | ns                | rec    | G2583_2566 | wcaM      | CDS  |
| O157                 | 2790221           | s                 | rec    | G2583_2566 | wcaM      | CDS  |
| O157                 | 2790257           | s                 | rec    | G2583_2566 | wcaM      | CDS  |
| O157                 | 2790287           | s                 | rec    | G2583_2566 | wcaM      | CDS  |
| O157                 | 2790299           | ns                | rec    | G2583_2566 | wcaM      | CDS  |
| O157                 | 2790395           | s                 | rec    | G2583_2566 | wcaM      | CDS  |
| O157                 | 2790398           | s                 | rec    | G2583_2566 | wcaM      | CDS  |
| O157                 | 2790432           | ns                | rec    | G2583_2566 | wcaM      | CDS  |
| O157                 | 2790445           | ns                | rec    | G2583_2566 | wcaM      | CDS  |
| O157                 | 2790491           | s                 | rec    | G2583_2566 | wcaM      | CDS  |
| O157                 | 2790515           | s                 | rec    | G2583_2566 | wcaM      | CDS  |
| O157                 | 2790530           | s                 | rec    | G2583_2566 | wcaM      | CDS  |
| O157                 | 2790551           | s                 | rec    | G2583_2566 | wcaM      | CDS  |
| O157                 | 2790566           | s                 | rec    | G2583_2566 | wcaM      | CDS  |
| O157                 | 2790571           | ns                | rec    | G2583_2566 | wcaM      | CDS  |
| O157                 | 2790575           | s                 | rec    | G2583_2566 | wcaM      | CDS  |
| O157                 | 2790578           | s                 | rec    | G2583_2566 | wcaM      | CDS  |
| O157                 | 2790599           | s                 | rec    | G2583_2566 | wcaM      | CDS  |
| O157                 | 2790668           | ns                | rec    | G2583_2566 | wcaM      | CDS  |
| O157                 | 2790670           | ns                | rec    | G2583_2566 | wcaM      | CDS  |
| O157                 | 2790680           | s                 | rec    | G2583_2566 | wcaM      | CDS  |
| O157                 | 2790701           | s                 | rec    | G2583_2566 | wcaM      | CDS  |
| O157                 | 2790728           | s                 | rec    | G2583_2566 | wcaM      | CDS  |
| O157                 | 2790749           | s                 | rec    | G2583_2566 | wcaM      | CDS  |
| O157                 | 2790797           | ns                | rec    | G2583_2566 | wcaM      | CDS  |
| O157                 | 2790799           | ns                | rec    | G2583_2566 | wcaM      | CDS  |
| O157                 | 2790800           | s                 | rec    | G2583_2566 | wcaM      | CDS  |
| O157                 | 2790803           | s                 | rec    | G2583_2566 | wcaM      | CDS  |
| O157                 | 2790872           | s                 | rec    | G2583_2566 | wcaM      | CDS  |
| O157                 | 2790893           | s                 | rec    | G2583_2566 | wcaM      | CDS  |
| O157                 | 2790914           | s                 | rec    | G2583_2566 | wcaM      | CDS  |
| O157                 | 2790917           | s                 | rec    | G2583_2566 | wcaM      | CDS  |
| O157                 | 2790949           | ns                | rec    | G2583_2566 | wcaM      | CDS  |
| O157                 | 2791004           | s                 | rec    | G2583_2566 | wcaM      | CDS  |
| O157                 | 2791040           | s                 | rec    | G2583_2566 | wcaM      | CDS  |
| O157                 | 2791043           | s                 | rec    | G2583_2566 | wcaM      | CDS  |
| O157                 | 2791049           | s                 | rec    | G2583_2566 | wcaM      | CDS  |
| O157                 | 2791052           | s                 | rec    | G2583_2566 | wcaM      | CDS  |
| O157                 | 2791080           | ns                | rec    | G2583_2566 | wcaM      | CDS  |
| O157                 | 2791082           | ns                | rec    | G2583_2566 | wcaM      | CDS  |

| lineage <sup>a</sup> | site <sup>b</sup> | mutation          |        | gene       | Gene name | Type |
|----------------------|-------------------|-------------------|--------|------------|-----------|------|
|                      |                   | type <sup>c</sup> | recomb |            |           |      |
| O157                 | 2791088           | s                 | rec    | G2583_2566 | wcaM      | CDS  |
| O157                 | 2791100           | s                 | rec    | G2583_2566 | wcaM      | CDS  |
| O157                 | 2791151           | s                 | rec    | G2583_2566 | wcaM      | CDS  |
| O157                 | 2791154           | s                 | rec    | G2583_2566 | wcaM      | CDS  |
| O157                 | 2791166           | s                 | rec    | G2583_2566 | wcaM      | CDS  |
| O157                 | 2791169           | s                 | rec    | G2583_2566 | wcaM      | CDS  |
| O157                 | 2791187           | s                 | rec    | G2583_2566 | wcaM      | CDS  |
| O157                 | 2791214           | s                 | rec    | G2583_2566 | wcaM      | CDS  |
| O157                 | 2791277           | i                 | rec    | intergenic |           |      |
| O157                 | 2791350           | s                 | rec    | G2583_2567 | wcaL      | CDS  |
| O157                 | 2791365           | s                 | rec    | G2583_2567 | wcaL      | CDS  |
| O157                 | 2791385           | s                 | rec    | G2583_2567 | wcaL      | CDS  |
| O157                 | 2791412           | ns                | rec    | G2583_2567 | wcaL      | CDS  |
| O157                 | 2791419           | s                 | rec    | G2583_2567 | wcaL      | CDS  |
| O157                 | 2791425           | s                 | rec    | G2583_2567 | wcaL      | CDS  |
| O157                 | 2791431           | s                 | rec    | G2583_2567 | wcaL      | CDS  |
| O157                 | 2791470           | s                 | rec    | G2583_2567 | wcaL      | CDS  |
| O157                 | 2791473           | s                 | rec    | G2583_2567 | wcaL      | CDS  |
| O157                 | 2791484           | s                 | rec    | G2583_2567 | wcaL      | CDS  |
| O157                 | 2791488           | s                 | rec    | G2583_2567 | wcaL      | CDS  |
| O157                 | 2791539           | s                 | rec    | G2583_2567 | wcaL      | CDS  |
| O157                 | 2791545           | s                 | rec    | G2583_2567 | wcaL      | CDS  |
| O157                 | 2791548           | s                 | rec    | G2583_2567 | wcaL      | CDS  |
| O157                 | 2791560           | s                 | rec    | G2583_2567 | wcaL      | CDS  |
| O157                 | 2791581           | s                 | rec    | G2583_2567 | wcaL      | CDS  |
| O157                 | 2791584           | s                 | rec    | G2583_2567 | wcaL      | CDS  |
| O157                 | 2791587           | s                 | rec    | G2583_2567 | wcaL      | CDS  |
| O157                 | 2791617           | s                 | rec    | G2583_2567 | wcaL      | CDS  |
| O157                 | 2791627           | ns                | rec    | G2583_2567 | wcaL      | CDS  |
| O157                 | 2791662           | ns                | rec    | G2583_2567 | wcaL      | CDS  |
| O157                 | 2791665           | s                 | rec    | G2583_2567 | wcaL      | CDS  |
| O157                 | 2791698           | s                 | rec    | G2583_2567 | wcaL      | CDS  |
| O157                 | 2791754           | ns                | rec    | G2583_2567 | wcaL      | CDS  |
| O157                 | 2791773           | s                 | rec    | G2583_2567 | wcaL      | CDS  |
| O157                 | 2791785           | s                 | rec    | G2583_2567 | wcaL      | CDS  |
| O157                 | 2791800           | s                 | rec    | G2583_2567 | wcaL      | CDS  |
| O157                 | 2791809           | s                 | rec    | G2583_2567 | wcaL      | CDS  |
| O157                 | 2791830           | s                 | rec    | G2583_2567 | wcaL      | CDS  |
| O157                 | 2791833           | s                 | rec    | G2583_2567 | wcaL      | CDS  |
| O157                 | 2791836           | s                 | rec    | G2583_2567 | wcaL      | CDS  |
| O157                 | 2791845           | s                 | rec    | G2583_2567 | wcaL      | CDS  |
| O157                 | 2791863           | s                 | rec    | G2583_2567 | wcaL      | CDS  |
| O157                 | 2791878           | s                 | rec    | G2583_2567 | wcaL      | CDS  |
| O157                 | 2791887           | s                 | rec    | G2583_2567 | wcaL      | CDS  |
| O157                 | 2791890           | s                 | rec    | G2583_2567 | wcaL      | CDS  |

| lineage <sup>a</sup> | site <sup>b</sup> | mutation          |        | gene       | Gene name | Type |
|----------------------|-------------------|-------------------|--------|------------|-----------|------|
|                      |                   | type <sup>c</sup> | recomb |            |           |      |
| O157                 | 2791968           | s                 | rec    | G2583_2567 | wcaL      | CDS  |
| O157                 | 2791980           | s                 | rec    | G2583_2567 | wcaL      | CDS  |
| O157                 | 2791986           | s                 | rec    | G2583_2567 | wcaL      | CDS  |
| O157                 | 2791989           | s                 | rec    | G2583_2567 | wcaL      | CDS  |
| O157                 | 2791992           | s                 | rec    | G2583_2567 | wcaL      | CDS  |
| O157                 | 2792001           | s                 | rec    | G2583_2567 | wcaL      | CDS  |
| O157                 | 2792031           | s                 | rec    | G2583_2567 | wcaL      | CDS  |
| O157                 | 2792043           | s                 | rec    | G2583_2567 | wcaL      | CDS  |
| O157                 | 2792052           | s                 | rec    | G2583_2567 | wcaL      | CDS  |
| O157                 | 2792061           | s                 | rec    | G2583_2567 | wcaL      | CDS  |
| O157                 | 2792080           | ns                | rec    | G2583_2567 | wcaL      | CDS  |
| O157                 | 2792100           | s                 | rec    | G2583_2567 | wcaL      | CDS  |
| O157                 | 2792121           | s                 | rec    | G2583_2567 | wcaL      | CDS  |
| O157                 | 2792124           | s                 | rec    | G2583_2567 | wcaL      | CDS  |
| O157                 | 2792127           | s                 | rec    | G2583_2567 | wcaL      | CDS  |
| O157                 | 2792133           | s                 | rec    | G2583_2567 | wcaL      | CDS  |
| O157                 | 2792142           | s                 | rec    | G2583_2567 | wcaL      | CDS  |
| O157                 | 2792145           | s                 | rec    | G2583_2567 | wcaL      | CDS  |
| O157                 | 2792154           | ns                | rec    | G2583_2567 | wcaL      | CDS  |
| O157                 | 2792155           | ns                | rec    | G2583_2567 | wcaL      | CDS  |
| O157                 | 2792159           | ns                | rec    | G2583_2567 | wcaL      | CDS  |
| O157                 | 2792165           | ns                | rec    | G2583_2567 | wcaL      | CDS  |
| O157                 | 2792167           | ns                | rec    | G2583_2567 | wcaL      | CDS  |
| O157                 | 2792204           | ns                | rec    | G2583_2567 | wcaL      | CDS  |
| O157                 | 2792259           | s                 | rec    | G2583_2567 | wcaL      | CDS  |
| O157                 | 2792268           | s                 | rec    | G2583_2567 | wcaL      | CDS  |
| O157                 | 2792271           | s                 | rec    | G2583_2567 | wcaL      | CDS  |
| O157                 | 2792277           | s                 | rec    | G2583_2567 | wcaL      | CDS  |
| O157                 | 2792283           | s                 | rec    | G2583_2567 | wcaL      | CDS  |
| O157                 | 2792358           | s                 | rec    | G2583_2567 | wcaL      | CDS  |
| O157                 | 2792368           | ns                | rec    | G2583_2567 | wcaL      | CDS  |
| O157                 | 2792379           | ns                | rec    | G2583_2567 | wcaL      | CDS  |
| O157                 | 2792381           | ns                | rec    | G2583_2567 | wcaL      | CDS  |
| O157                 | 2792385           | s                 | rec    | G2583_2567 | wcaL      | CDS  |
| O157                 | 2792399           | s                 | rec    | G2583_2567 | wcaL      | CDS  |
| O157                 | 2792406           | s                 | rec    | G2583_2567 | wcaL      | CDS  |
| O157                 | 2792415           | s                 | rec    | G2583_2567 | wcaL      | CDS  |
| O157                 | 2792421           | s                 | rec    | G2583_2567 | wcaL      | CDS  |
| O157                 | 2792439           | s                 | rec    | G2583_2567 | wcaL      | CDS  |
| O157                 | 2792442           | s                 | rec    | G2583_2567 | wcaL      | CDS  |
| O157                 | 2792448           | s                 | rec    | G2583_2567 | wcaL      | CDS  |
| O157                 | 2792451           | s                 | rec    | G2583_2567 | wcaL      | CDS  |
| O157                 | 2792454           | s                 | rec    | G2583_2567 | wcaL      | CDS  |
| O157                 | 2792466           | s                 | rec    | G2583_2567 | wcaL      | CDS  |
| O157                 | 2792486           | s                 | rec    | G2583_2567 | wcaL      | CDS  |

| lineage <sup>a</sup> | site <sup>b</sup> | mutation          |        | gene       | Gene name | Type |
|----------------------|-------------------|-------------------|--------|------------|-----------|------|
|                      |                   | type <sup>c</sup> | recomb |            |           |      |
| O157                 | 2792490           | s                 | rec    | G2583_2567 | wcaL      | CDS  |
| O157                 | 2792511           | ns                | rec    | G2583_2568 | wcaK      | CDS  |
| O157                 | 2792525           | s                 | rec    | G2583_2568 | wcaK      | CDS  |
| O157                 | 2792528           | s                 | rec    | G2583_2568 | wcaK      | CDS  |
| O157                 | 2792531           | s                 | rec    | G2583_2568 | wcaK      | CDS  |
| O157                 | 2792534           | s                 | rec    | G2583_2568 | wcaK      | CDS  |
| O157                 | 2792537           | s                 | rec    | G2583_2568 | wcaK      | CDS  |
| O157                 | 2792564           | s                 | rec    | G2583_2568 | wcaK      | CDS  |
| O157                 | 2792583           | ns                | rec    | G2583_2568 | wcaK      | CDS  |
| O157                 | 2792591           | s                 | rec    | G2583_2568 | wcaK      | CDS  |
| O157                 | 2792609           | s                 | rec    | G2583_2568 | wcaK      | CDS  |
| O157                 | 2792641           | s                 | rec    | G2583_2568 | wcaK      | CDS  |
| O157                 | 2792651           | s                 | rec    | G2583_2568 | wcaK      | CDS  |
| O157                 | 2792653           | s                 | rec    | G2583_2568 | wcaK      | CDS  |
| O157                 | 2792672           | s                 | rec    | G2583_2568 | wcaK      | CDS  |
| O157                 | 2792681           | s                 | rec    | G2583_2568 | wcaK      | CDS  |
| O157                 | 2792684           | s                 | rec    | G2583_2568 | wcaK      | CDS  |
| O157                 | 2792687           | s                 | rec    | G2583_2568 | wcaK      | CDS  |
| O157                 | 2792693           | s                 | rec    | G2583_2568 | wcaK      | CDS  |
| O157                 | 2792696           | s                 | rec    | G2583_2568 | wcaK      | CDS  |
| O157                 | 2792704           | ns                | rec    | G2583_2568 | wcaK      | CDS  |
| O157                 | 2792723           | s                 | rec    | G2583_2568 | wcaK      | CDS  |
| O157                 | 2792738           | s                 | rec    | G2583_2568 | wcaK      | CDS  |
| O157                 | 2792747           | s                 | rec    | G2583_2568 | wcaK      | CDS  |
| O157                 | 2792753           | s                 | rec    | G2583_2568 | wcaK      | CDS  |
| O157                 | 2792759           | s                 | rec    | G2583_2568 | wcaK      | CDS  |
| O157                 | 2792807           | s                 | rec    | G2583_2568 | wcaK      | CDS  |
| O157                 | 2792837           | s                 | rec    | G2583_2568 | wcaK      | CDS  |
| O157                 | 2792858           | s                 | rec    | G2583_2568 | wcaK      | CDS  |
| O157                 | 2792891           | s                 | rec    | G2583_2568 | wcaK      | CDS  |
| O157                 | 2792900           | s                 | rec    | G2583_2568 | wcaK      | CDS  |
| O157                 | 2792933           | s                 | rec    | G2583_2568 | wcaK      | CDS  |
| O157                 | 2792970           | ns                | rec    | G2583_2568 | wcaK      | CDS  |
| O157                 | 2793015           | ns                | rec    | G2583_2568 | wcaK      | CDS  |
| O157                 | 2793020           | s                 | rec    | G2583_2568 | wcaK      | CDS  |
| O157                 | 2793134           | s                 | rec    | G2583_2568 | wcaK      | CDS  |
| O157                 | 2793215           | s                 | rec    | G2583_2568 | wcaK      | CDS  |
| O157                 | 2793217           | s                 | rec    | G2583_2568 | wcaK      | CDS  |
| O157                 | 2793221           | s                 | rec    | G2583_2568 | wcaK      | CDS  |
| O157                 | 2793241           | s                 | rec    | G2583_2568 | wcaK      | CDS  |
| O157                 | 2793247           | s                 | rec    | G2583_2568 | wcaK      | CDS  |
| O157                 | 2793251           | s                 | rec    | G2583_2568 | wcaK      | CDS  |
| O157                 | 2793353           | s                 | rec    | G2583_2568 | wcaK      | CDS  |
| O157                 | 2793365           | s                 | rec    | G2583_2568 | wcaK      | CDS  |
| O157                 | 2793383           | s                 | rec    | G2583_2568 | wcaK      | CDS  |

| lineage <sup>a</sup> | site <sup>b</sup> | mutation          |        | gene       | Gene name | Type |
|----------------------|-------------------|-------------------|--------|------------|-----------|------|
|                      |                   | type <sup>c</sup> | recomb |            |           |      |
| O157                 | 2793386           | s                 | rec    | G2583_2568 | wcaK      | CDS  |
| O157                 | 2793443           | s                 | rec    | G2583_2568 | wcaK      | CDS  |
| O157                 | 2793445           | s                 | rec    | G2583_2568 | wcaK      | CDS  |
| O157                 | 2793485           | s                 | rec    | G2583_2568 | wcaK      | CDS  |
| O157                 | 2793527           | s                 | rec    | G2583_2568 | wcaK      | CDS  |
| O157                 | 2793533           | s                 | rec    | G2583_2568 | wcaK      | CDS  |
| O157                 | 2793602           | s                 | rec    | G2583_2568 | wcaK      | CDS  |
| O157                 | 2793617           | s                 | rec    | G2583_2568 | wcaK      | CDS  |
| O157                 | 2793685           | ns                | rec    | G2583_2568 | wcaK      | CDS  |
| O157                 | 2793696           | ns                | rec    | G2583_2568 | wcaK      | CDS  |
| O157                 | 2793815           | del-14            | rec    | intergenic |           |      |
| O157                 | 2793944           | i                 | rec    | intergenic |           |      |
| O157                 | 2793959           | i                 | rec    | intergenic |           |      |
| O157                 | 2793961           | i                 | rec    | intergenic |           |      |
| O157                 | 2793963           | i                 | rec    | intergenic |           |      |
| O157                 | 2793981           | ns                | rec    | G2583_2569 | wzxC      | CDS  |
| O157                 | 2794012           | s                 | rec    | G2583_2569 | wzxC      | CDS  |
| O157                 | 2794060           | s                 | rec    | G2583_2569 | wzxC      | CDS  |
| O157                 | 2794131           | ns                | rec    | G2583_2569 | wzxC      | CDS  |
| O157                 | 2794132           | ns                | rec    | G2583_2569 | wzxC      | CDS  |
| O157                 | 2794134           | ns                | rec    | G2583_2569 | wzxC      | CDS  |
| O157                 | 2794142           | ns                | rec    | G2583_2569 | wzxC      | CDS  |
| O157                 | 2794183           | s                 | rec    | G2583_2569 | wzxC      | CDS  |
| O157                 | 2794189           | s                 | rec    | G2583_2569 | wzxC      | CDS  |
| O157                 | 2794222           | s                 | rec    | G2583_2569 | wzxC      | CDS  |
| O157                 | 2794225           | s                 | rec    | G2583_2569 | wzxC      | CDS  |
| O157                 | 2794269           | ns                | rec    | G2583_2569 | wzxC      | CDS  |
| O157                 | 2794324           | s                 | rec    | G2583_2569 | wzxC      | CDS  |
| O157                 | 2794351           | s                 | rec    | G2583_2569 | wzxC      | CDS  |
| O157                 | 2794390           | s                 | rec    | G2583_2569 | wzxC      | CDS  |
| O157                 | 2794426           | s                 | rec    | G2583_2569 | wzxC      | CDS  |
| O157                 | 2794429           | s                 | rec    | G2583_2569 | wzxC      | CDS  |
| O157                 | 2794438           | s                 | rec    | G2583_2569 | wzxC      | CDS  |
| O157                 | 2794441           | s                 | rec    | G2583_2569 | wzxC      | CDS  |
| O157                 | 2794447           | ns                | rec    | G2583_2569 | wzxC      | CDS  |
| O157                 | 2794449           | ns                | rec    | G2583_2569 | wzxC      | CDS  |
| O157                 | 2794489           | s                 | rec    | G2583_2569 | wzxC      | CDS  |
| O157                 | 2794492           | s                 | rec    | G2583_2569 | wzxC      | CDS  |
| O157                 | 2794498           | s                 | rec    | G2583_2569 | wzxC      | CDS  |
| O157                 | 2794609           | s                 | rec    | G2583_2569 | wzxC      | CDS  |
| O157                 | 2794627           | s                 | rec    | G2583_2569 | wzxC      | CDS  |
| O157                 | 2794630           | s                 | rec    | G2583_2569 | wzxC      | CDS  |
| O157                 | 2794645           | s                 | rec    | G2583_2569 | wzxC      | CDS  |
| O157                 | 2794657           | s                 | rec    | G2583_2569 | wzxC      | CDS  |
| O157                 | 2794666           | s                 | rec    | G2583_2569 | wzxC      | CDS  |

| lineage <sup>a</sup> | site <sup>b</sup> | mutation          |        | gene       | Gene name | Type |
|----------------------|-------------------|-------------------|--------|------------|-----------|------|
|                      |                   | type <sup>c</sup> | recomb |            |           |      |
| O157                 | 2794708           | s                 | rec    | G2583_2569 | wzxC      | CDS  |
| O157                 | 2794720           | ns                | rec    | G2583_2569 | wzxC      | CDS  |
| O157                 | 2794722           | ns                | rec    | G2583_2569 | wzxC      | CDS  |
| O157                 | 2794765           | s                 | rec    | G2583_2569 | wzxC      | CDS  |
| O157                 | 2794822           | s                 | rec    | G2583_2569 | wzxC      | CDS  |
| O157                 | 2794825           | s                 | rec    | G2583_2569 | wzxC      | CDS  |
| O157                 | 2794828           | s                 | rec    | G2583_2569 | wzxC      | CDS  |
| O157                 | 2794852           | s                 | rec    | G2583_2569 | wzxC      | CDS  |
| O157                 | 2794897           | s                 | rec    | G2583_2569 | wzxC      | CDS  |
| O157                 | 2794987           | s                 | rec    | G2583_2569 | wzxC      | CDS  |
| O157                 | 2795035           | s                 | rec    | G2583_2569 | wzxC      | CDS  |
| O157                 | 2795071           | s                 | rec    | G2583_2569 | wzxC      | CDS  |
| O157                 | 2795104           | s                 | rec    | G2583_2569 | wzxC      | CDS  |
| O157                 | 2795122           | s                 | rec    | G2583_2569 | wzxC      | CDS  |
| O157                 | 2795130           | ns                | rec    | G2583_2569 | wzxC      | CDS  |
| O157                 | 2795167           | s                 | rec    | G2583_2569 | wzxC      | CDS  |
| O157                 | 2795248           | s                 | rec    | G2583_2569 | wzxC      | CDS  |
| O157                 | 2795257           | s                 | rec    | G2583_2569 | wzxC      | CDS  |
| O157                 | 2795308           | s                 | rec    | G2583_2569 | wzxC      | CDS  |
| O157                 | 2795311           | s                 | rec    | G2583_2569 | wzxC      | CDS  |
| O157                 | 2795316           | s                 | rec    | G2583_2569 | wzxC      | CDS  |
| O157                 | 2795317           | s                 | rec    | G2583_2569 | wzxC      | CDS  |
| O157                 | 2795367           | s                 | rec    | G2583_2569 | wzxC      | CDS  |
| O157                 | 2795468           | s                 | rec    | G2583_2570 | wcaJ      | CDS  |
| O157                 | 2795471           | s                 | rec    | G2583_2570 | wcaJ      | CDS  |
| O157                 | 2795477           | s                 | rec    | G2583_2570 | wcaJ      | CDS  |
| O157                 | 2795636           | s                 | rec    | G2583_2570 | wcaJ      | CDS  |
| O157                 | 2795663           | s                 | rec    | G2583_2570 | wcaJ      | CDS  |
| O157                 | 2795690           | s                 | rec    | G2583_2570 | wcaJ      | CDS  |
| O157                 | 2795699           | s                 | rec    | G2583_2570 | wcaJ      | CDS  |
| O157                 | 2795735           | s                 | rec    | G2583_2570 | wcaJ      | CDS  |
| O157                 | 2795771           | s                 | rec    | G2583_2570 | wcaJ      | CDS  |
| O157                 | 2795777           | s                 | rec    | G2583_2570 | wcaJ      | CDS  |
| O157                 | 2795819           | s                 | rec    | G2583_2570 | wcaJ      | CDS  |
| O157                 | 2795822           | s                 | rec    | G2583_2570 | wcaJ      | CDS  |
| O157                 | 2795879           | s                 | rec    | G2583_2570 | wcaJ      | CDS  |
| O157                 | 2795885           | s                 | rec    | G2583_2570 | wcaJ      | CDS  |
| O157                 | 2795957           | s                 | rec    | G2583_2570 | wcaJ      | CDS  |
| O157                 | 2796056           | s                 | rec    | G2583_2570 | wcaJ      | CDS  |
| O157                 | 2796071           | s                 | rec    | G2583_2570 | wcaJ      | CDS  |
| O157                 | 2796089           | ns                | rec    | G2583_2570 | wcaJ      | CDS  |
| O157                 | 2796091           | ns                | rec    | G2583_2570 | wcaJ      | CDS  |
| O157                 | 2796101           | s                 | rec    | G2583_2570 | wcaJ      | CDS  |
| O157                 | 2796107           | s                 | rec    | G2583_2570 | wcaJ      | CDS  |
| O157                 | 2796122           | s                 | rec    | G2583_2570 | wcaJ      | CDS  |

| lineage <sup>a</sup> | site <sup>b</sup> | mutation          |        | gene       | Gene name | Type |
|----------------------|-------------------|-------------------|--------|------------|-----------|------|
|                      |                   | type <sup>c</sup> | recomb |            |           |      |
| O157                 | 2796130           | ns                | rec    | G2583_2570 | wcaJ      | CDS  |
| Sakai                | 2796191           | s                 |        | G2583_2570 | wcaJ      | CDS  |
| O157                 | 2796200           | s                 | rec    | G2583_2570 | wcaJ      | CDS  |
| O157                 | 2796233           | s                 | rec    | G2583_2570 | wcaJ      | CDS  |
| O157                 | 2796239           | s                 | rec    | G2583_2570 | wcaJ      | CDS  |
| O157                 | 2796263           | s                 | rec    | G2583_2570 | wcaJ      | CDS  |
| O157                 | 2796266           | s                 | rec    | G2583_2570 | wcaJ      | CDS  |
| O157                 | 2796294           | ns                | rec    | G2583_2570 | wcaJ      | CDS  |
| O157                 | 2796302           | s                 | rec    | G2583_2570 | wcaJ      | CDS  |
| O157                 | 2796308           | s                 | rec    | G2583_2570 | wcaJ      | CDS  |
| O157                 | 2796311           | s                 | rec    | G2583_2570 | wcaJ      | CDS  |
| O157                 | 2796314           | s                 | rec    | G2583_2570 | wcaJ      | CDS  |
| O157                 | 2796344           | s                 | rec    | G2583_2570 | wcaJ      | CDS  |
| O157                 | 2796371           | s                 | rec    | G2583_2570 | wcaJ      | CDS  |
| O157                 | 2796392           | s                 | rec    | G2583_2570 | wcaJ      | CDS  |
| O157                 | 2796395           | s                 | rec    | G2583_2570 | wcaJ      | CDS  |
| O157                 | 2796404           | s                 | rec    | G2583_2570 | wcaJ      | CDS  |
| O157                 | 2796479           | s                 | rec    | G2583_2570 | wcaJ      | CDS  |
| O157                 | 2796504           | ns                | rec    | G2583_2570 | wcaJ      | CDS  |
| O157                 | 2796521           | s                 | rec    | G2583_2570 | wcaJ      | CDS  |
| O157                 | 2796589           | s                 | rec    | G2583_2570 | wcaJ      | CDS  |
| O157                 | 2796715           | s                 | rec    | G2583_2570 | wcaJ      | CDS  |
| O157                 | 2796743           | s                 | rec    | G2583_2570 | wcaJ      | CDS  |
| O157                 | 2796852           | i                 | rec    | intergenic |           |      |
| O157                 | 2796956           | s                 | rec    | G2583_2571 | cpsG      | CDS  |
| O157                 | 2797004           | s                 | rec    | G2583_2571 | cpsG      | CDS  |
| O157                 | 2797076           | s                 | rec    | G2583_2571 | cpsG      | CDS  |
| O157                 | 2797085           | s                 | rec    | G2583_2571 | cpsG      | CDS  |
| O157                 | 2797098           | ns                | rec    | G2583_2571 | cpsG      | CDS  |
| O157                 | 2797109           | ns                | rec    | G2583_2571 | cpsG      | CDS  |
| O157                 | 2797141           | ns                | rec    | G2583_2571 | cpsG      | CDS  |
| O157                 | 2797160           | s                 | rec    | G2583_2571 | cpsG      | CDS  |
| O157                 | 2797166           | s                 | rec    | G2583_2571 | cpsG      | CDS  |
| O157                 | 2797184           | s                 | rec    | G2583_2571 | cpsG      | CDS  |
| O157                 | 2797187           | ns                | rec    | G2583_2571 | cpsG      | CDS  |
| O157                 | 2797188           | ns                | rec    | G2583_2571 | cpsG      | CDS  |
| O157                 | 2797262           | s                 | rec    | G2583_2571 | cpsG      | CDS  |
| O157                 | 2797265           | s                 | rec    | G2583_2571 | cpsG      | CDS  |
| O157                 | 2797313           | s                 | rec    | G2583_2571 | cpsG      | CDS  |
| O157                 | 2797355           | s                 | rec    | G2583_2571 | cpsG      | CDS  |
| O157                 | 2797361           | s                 | rec    | G2583_2571 | cpsG      | CDS  |
| O157                 | 2797388           | s                 | rec    | G2583_2571 | cpsG      | CDS  |
| O157                 | 2797403           | s                 | rec    | G2583_2571 | cpsG      | CDS  |
| O157                 | 2797460           | s                 | rec    | G2583_2571 | cpsG      | CDS  |
| O157                 | 2797481           | s                 | rec    | G2583_2571 | cpsG      | CDS  |



| lineage <sup>a</sup> | site <sup>b</sup> | mutation          |        | gene       | Gene name | Type |
|----------------------|-------------------|-------------------|--------|------------|-----------|------|
|                      |                   | type <sup>c</sup> | recomb |            |           |      |
| O157                 | 2797535           | s                 | rec    | G2583_2571 | cpsG      | CDS  |
| O157                 | 2797562           | s                 | rec    | G2583_2571 | cpsG      | CDS  |
| O157                 | 2797580           | s                 | rec    | G2583_2571 | cpsG      | CDS  |
| O157                 | 2797589           | s                 | rec    | G2583_2571 | cpsG      | CDS  |
| O157                 | 2797603           | s                 | rec    | G2583_2571 | cpsG      | CDS  |
| O157                 | 2797604           | s                 | rec    | G2583_2571 | cpsG      | CDS  |
| O157                 | 2797607           | s                 | rec    | G2583_2571 | cpsG      | CDS  |
| O157                 | 2797637           | s                 | rec    | G2583_2571 | cpsG      | CDS  |
| O157                 | 2797649           | s                 | rec    | G2583_2571 | cpsG      | CDS  |
| O157                 | 2797667           | s                 | rec    | G2583_2571 | cpsG      | CDS  |
| O157                 | 2797697           | s                 | rec    | G2583_2571 | cpsG      | CDS  |
| O157                 | 2797721           | s                 | rec    | G2583_2571 | cpsG      | CDS  |
| O157                 | 2797760           | s                 | rec    | G2583_2571 | cpsG      | CDS  |
| O157                 | 2797928           | s                 | rec    | G2583_2571 | cpsG      | CDS  |
| O157                 | 2797940           | s                 | rec    | G2583_2571 | cpsG      | CDS  |
| O157                 | 2797952           | s                 | rec    | G2583_2571 | cpsG      | CDS  |
| O157                 | 2797964           | s                 | rec    | G2583_2571 | cpsG      | CDS  |
| O157                 | 2797976           | s                 | rec    | G2583_2571 | cpsG      | CDS  |
| O157                 | 2798060           | s                 | rec    | G2583_2571 | cpsG      | CDS  |
| O157                 | 2798063           | s                 | rec    | G2583_2571 | cpsG      | CDS  |
| O157                 | 2798087           | s                 | rec    | G2583_2571 | cpsG      | CDS  |
| O157                 | 2798106           | ns                | rec    | G2583_2571 | cpsG      | CDS  |
| O157                 | 2798120           | s                 | rec    | G2583_2571 | cpsG      | CDS  |
| O157                 | 2798124           | ns                | rec    | G2583_2571 | cpsG      | CDS  |
| O157                 | 2798138           | s                 | rec    | G2583_2571 | cpsG      | CDS  |
| O157                 | 2798174           | s                 | rec    | G2583_2571 | cpsG      | CDS  |
| O157                 | 2798183           | s                 | rec    | G2583_2571 | cpsG      | CDS  |
| O157                 | 2798192           | s                 | rec    | G2583_2571 | cpsG      | CDS  |
| O157                 | 2798218           | s                 | rec    | G2583_2571 | cpsG      | CDS  |
| O157                 | 2798222           | s                 | rec    | G2583_2571 | cpsG      | CDS  |
| O157                 | 2798446           | i                 | rec    | intergenic |           |      |
| O157                 | 2798451           | i                 | rec    | intergenic |           |      |
| O157                 | 2798454           | i                 | rec    | intergenic |           |      |
| O157                 | 2798455           | i                 | rec    | intergenic |           |      |
| O157                 | 2798456           | s                 | rec    | G2583_2572 | cpsB      | CDS  |
| O157                 | 2798567           | s                 | rec    | G2583_2572 | cpsB      | CDS  |
| O157                 | 2798594           | s                 | rec    | G2583_2572 | cpsB      | CDS  |
| O157                 | 2798630           | s                 | rec    | G2583_2572 | cpsB      | CDS  |
| O157                 | 2798633           | s                 | rec    | G2583_2572 | cpsB      | CDS  |
| O157                 | 2798651           | s                 | rec    | G2583_2572 | cpsB      | CDS  |
| O157                 | 2798684           | s                 | rec    | G2583_2572 | cpsB      | CDS  |
| O157                 | 2798780           | s                 | rec    | G2583_2572 | cpsB      | CDS  |
| O157                 | 2798786           | s                 | rec    | G2583_2572 | cpsB      | CDS  |
| O157                 | 2798885           | s                 | rec    | G2583_2572 | cpsB      | CDS  |
| O157                 | 2798995           | ns                | rec    | G2583_2572 | cpsB      | CDS  |

| lineage <sup>a</sup> | site <sup>b</sup> | mutation          |        | gene       | Gene name | Type |
|----------------------|-------------------|-------------------|--------|------------|-----------|------|
|                      |                   | type <sup>c</sup> | recomb |            |           |      |
| O157                 | 2799002           | s                 | rec    | G2583_2572 | cpsB      | CDS  |
| O157                 | 2799041           | s                 | rec    | G2583_2572 | cpsB      | CDS  |
| O157                 | 2799047           | s                 | rec    | G2583_2572 | cpsB      | CDS  |
| O157                 | 2799050           | s                 | rec    | G2583_2572 | cpsB      | CDS  |
| O157                 | 2799101           | s                 | rec    | G2583_2572 | cpsB      | CDS  |
| O157                 | 2799143           | s                 | rec    | G2583_2572 | cpsB      | CDS  |
| O157                 | 2799152           | ns                | rec    | G2583_2572 | cpsB      | CDS  |
| O157                 | 2799164           | s                 | rec    | G2583_2572 | cpsB      | CDS  |
| O157                 | 2799184           | ns                | rec    | G2583_2572 | cpsB      | CDS  |
| O157                 | 2799215           | s                 | rec    | G2583_2572 | cpsB      | CDS  |
| O157                 | 2799221           | s                 | rec    | G2583_2572 | cpsB      | CDS  |
| O157                 | 2799266           | s                 | rec    | G2583_2572 | cpsB      | CDS  |
| O157                 | 2799281           | s                 | rec    | G2583_2572 | cpsB      | CDS  |
| O157                 | 2799338           | s                 | rec    | G2583_2572 | cpsB      | CDS  |
| O157                 | 2799392           | s                 | rec    | G2583_2572 | cpsB      | CDS  |
| O157                 | 2799434           | s                 | rec    | G2583_2572 | cpsB      | CDS  |
| O157                 | 2799452           | s                 | rec    | G2583_2572 | cpsB      | CDS  |
| O157                 | 2799488           | s                 | rec    | G2583_2572 | cpsB      | CDS  |
| O157                 | 2799491           | s                 | rec    | G2583_2572 | cpsB      | CDS  |
| O157                 | 2799506           | s                 | rec    | G2583_2572 | cpsB      | CDS  |
| O157                 | 2799512           | s                 | rec    | G2583_2572 | cpsB      | CDS  |
| O157                 | 2799547           | s                 | rec    | G2583_2572 | cpsB      | CDS  |
| O157                 | 2799548           | s                 | rec    | G2583_2572 | cpsB      | CDS  |
| O157                 | 2799560           | s                 | rec    | G2583_2572 | cpsB      | CDS  |
| O157                 | 2799567           | ns                | rec    | G2583_2572 | cpsB      | CDS  |
| O157                 | 2799620           | s                 | rec    | G2583_2572 | cpsB      | CDS  |
| O157                 | 2799656           | s                 | rec    | G2583_2572 | cpsB      | CDS  |
| O157                 | 2799680           | s                 | rec    | G2583_2572 | cpsB      | CDS  |
| O157                 | 2799689           | s                 | rec    | G2583_2572 | cpsB      | CDS  |
| O157                 | 2799725           | s                 | rec    | G2583_2572 | cpsB      | CDS  |
| O157                 | 2799812           | s                 | rec    | G2583_2572 | cpsB      | CDS  |
| O157                 | 2799845           | s                 | rec    | G2583_2572 | cpsB      | CDS  |
| O157                 | 2800027           | s                 | rec    | G2583_2573 | wcal      | CDS  |
| O157                 | 2800081           | s                 | rec    | G2583_2573 | wcal      | CDS  |
| O157                 | 2800090           | s                 | rec    | G2583_2573 | wcal      | CDS  |
| O157                 | 2800102           | s                 | rec    | G2583_2573 | wcal      | CDS  |
| O157                 | 2800105           | s                 | rec    | G2583_2573 | wcal      | CDS  |
| O157                 | 2800129           | s                 | rec    | G2583_2573 | wcal      | CDS  |
| O157                 | 2800249           | s                 | rec    | G2583_2573 | wcal      | CDS  |
| O157                 | 2800265           | ns                | rec    | G2583_2573 | wcal      | CDS  |
| O157                 | 2800294           | s                 | rec    | G2583_2573 | wcal      | CDS  |
| O157                 | 2800348           | s                 | rec    | G2583_2573 | wcal      | CDS  |
| O157                 | 2800363           | s                 | rec    | G2583_2573 | wcal      | CDS  |
| O157                 | 2800472           | ns                | rec    | G2583_2573 | wcal      | CDS  |
| O157                 | 2800474           | s                 | rec    | G2583_2573 | wcal      | CDS  |

| lineage <sup>a</sup> | site <sup>b</sup> | mutation          |        | gene       | Gene name | Type |
|----------------------|-------------------|-------------------|--------|------------|-----------|------|
|                      |                   | type <sup>c</sup> | recomb |            |           |      |
| O157                 | 2800480           | s                 | rec    | G2583_2573 | wcal      | CDS  |
| O157                 | 2800498           | s                 | rec    | G2583_2573 | wcal      | CDS  |
| O157                 | 2800504           | s                 | rec    | G2583_2573 | wcal      | CDS  |
| O157                 | 2800534           | s                 | rec    | G2583_2573 | wcal      | CDS  |
| O157                 | 2800588           | s                 | rec    | G2583_2573 | wcal      | CDS  |
| O157                 | 2800690           | s                 | rec    | G2583_2573 | wcal      | CDS  |
| O157                 | 2800693           | s                 | rec    | G2583_2573 | wcal      | CDS  |
| O157                 | 2800975           | s                 | rec    | G2583_2573 | wcal      | CDS  |
| O157                 | 2801044           | s                 | rec    | G2583_2573 | wcal      | CDS  |
| O157                 | 2801053           | s                 | rec    | G2583_2573 | wcal      | CDS  |
| O157                 | 2801250           | ns                | rec    | G2583_2574 | gmm       | CDS  |
| O157                 | 2801259           | s                 | rec    | G2583_2574 | gmm       | CDS  |
| O157                 | 2801262           | s                 | rec    | G2583_2574 | gmm       | CDS  |
| O157                 | 2801373           | s                 | rec    | G2583_2574 | gmm       | CDS  |
| O157                 | 2801425           | ns                | rec    | G2583_2574 | gmm       | CDS  |
| O157                 | 2801532           | s                 | rec    | G2583_2574 | gmm       | CDS  |
| O157                 | 2801550           | s                 | rec    | G2583_2574 | gmm       | CDS  |
| O157                 | 2801735           | s                 | rec    | G2583_2575 | fcl       | CDS  |
| O157                 | 2801741           | s                 | rec    | G2583_2575 | fcl       | CDS  |
| O157                 | 2801840           | s                 | rec    | G2583_2575 | fcl       | CDS  |
| O157                 | 2801861           | s                 | rec    | G2583_2575 | fcl       | CDS  |
| O157                 | 2801876           | s                 | rec    | G2583_2575 | fcl       | CDS  |
| O157                 | 2801891           | s                 | rec    | G2583_2575 | fcl       | CDS  |
| O157                 | 2801936           | s                 | rec    | G2583_2575 | fcl       | CDS  |
| O157                 | 2801945           | s                 | rec    | G2583_2575 | fcl       | CDS  |
| O157                 | 2801975           | s                 | rec    | G2583_2575 | fcl       | CDS  |
| O157                 | 2802017           | s                 | rec    | G2583_2575 | fcl       | CDS  |
| O157                 | 2802032           | s                 | rec    | G2583_2575 | fcl       | CDS  |
| O157                 | 2802041           | s                 | rec    | G2583_2575 | fcl       | CDS  |
| O157                 | 2802053           | s                 | rec    | G2583_2575 | fcl       | CDS  |
| O157                 | 2802056           | s                 | rec    | G2583_2575 | fcl       | CDS  |
| O157                 | 2802059           | s                 | rec    | G2583_2575 | fcl       | CDS  |
| O157                 | 2802062           | s                 | rec    | G2583_2575 | fcl       | CDS  |
| O157                 | 2802083           | s                 | rec    | G2583_2575 | fcl       | CDS  |
| O157                 | 2802101           | s                 | rec    | G2583_2575 | fcl       | CDS  |
| O157                 | 2802116           | s                 | rec    | G2583_2575 | fcl       | CDS  |
| O157                 | 2802182           | s                 | rec    | G2583_2575 | fcl       | CDS  |
| O157                 | 2802236           | s                 | rec    | G2583_2575 | fcl       | CDS  |
| O157                 | 2802320           | s                 | rec    | G2583_2575 | fcl       | CDS  |
| O157                 | 2802374           | s                 | rec    | G2583_2575 | fcl       | CDS  |
| O157                 | 2802398           | ns                | rec    | G2583_2575 | fcl       | CDS  |
| O157                 | 2802400           | ns                | rec    | G2583_2575 | fcl       | CDS  |
| O157                 | 2802425           | s                 | rec    | G2583_2575 | fcl       | CDS  |
| O157                 | 2802555           | ns                | rec    | G2583_2575 | fcl       | CDS  |
| O157                 | 2802563           | i                 | rec    | intergenic |           |      |

| lineage <sup>a</sup> | site <sup>b</sup> | mutation          |        | gene       | Gene name | Type |
|----------------------|-------------------|-------------------|--------|------------|-----------|------|
|                      |                   | type <sup>c</sup> | recomb |            |           |      |
| O157                 | 2802742           | s                 | rec    | G2583_2576 | gmd       | CDS  |
| O157                 | 2802763           | s                 | rec    | G2583_2576 | gmd       | CDS  |
| O157                 | 2802784           | s                 | rec    | G2583_2576 | gmd       | CDS  |
| O157                 | 2802796           | s                 | rec    | G2583_2576 | gmd       | CDS  |
| O157                 | 2802832           | s                 | rec    | G2583_2576 | gmd       | CDS  |
| O157                 | 2802847           | s                 | rec    | G2583_2576 | gmd       | CDS  |
| O157                 | 2802910           | s                 | rec    | G2583_2576 | gmd       | CDS  |
| O157                 | 2802931           | s                 | rec    | G2583_2576 | gmd       | CDS  |
| O157                 | 2802934           | s                 | rec    | G2583_2576 | gmd       | CDS  |
| O157                 | 2802949           | s                 | rec    | G2583_2576 | gmd       | CDS  |
| O157                 | 2802952           | s                 | rec    | G2583_2576 | gmd       | CDS  |
| O157                 | 2803171           | s                 | rec    | G2583_2576 | gmd       | CDS  |
| O157                 | 2803180           | s                 | rec    | G2583_2576 | gmd       | CDS  |
| O157                 | 2803228           | s                 | rec    | G2583_2576 | gmd       | CDS  |
| O157                 | 2803246           | s                 | rec    | G2583_2576 | gmd       | CDS  |
| O157                 | 2803369           | s                 | rec    | G2583_2576 | gmd       | CDS  |
| O157                 | 2803378           | s                 | rec    | G2583_2576 | gmd       | CDS  |
| O157                 | 2803468           | s                 | rec    | G2583_2576 | gmd       | CDS  |
| O157                 | 2803582           | s                 | rec    | G2583_2576 | gmd       | CDS  |
| O157                 | 2803703           | ins-2             | rec    | intergenic |           |      |
| O157                 | 2803735           | ns                | rec    | G2583_2577 | wcaF      | CDS  |
| O157                 | 2803744           | ns                | rec    | G2583_2577 | wcaF      | CDS  |
| O157                 | 2803853           | s                 | rec    | G2583_2577 | wcaF      | CDS  |
| O157                 | 2803937           | s                 | rec    | G2583_2577 | wcaF      | CDS  |
| O157                 | 2804015           | ns                | rec    | G2583_2577 | wcaF      | CDS  |
| O157                 | 2804031           | ns                | rec    | G2583_2577 | wcaF      | CDS  |
| O157                 | 2804132           | s                 | rec    | G2583_2577 | wcaF      | CDS  |
| O157                 | 2804173           | ns                | rec    | G2583_2577 | wcaF      | CDS  |
| O157                 | 2804249           | s                 | rec    | G2583_2577 | wcaF      | CDS  |
| O157                 | 2804321           | s                 | rec    | G2583_2578 | wcaE      | CDS  |
| O157                 | 2804345           | s                 | rec    | G2583_2578 | wcaE      | CDS  |
| O157                 | 2804351           | s                 | rec    | G2583_2578 | wcaE      | CDS  |
| O157                 | 2804372           | s                 | rec    | G2583_2578 | wcaE      | CDS  |
| O157                 | 2804390           | s                 | rec    | G2583_2578 | wcaE      | CDS  |
| O157                 | 2804402           | s                 | rec    | G2583_2578 | wcaE      | CDS  |
| O157                 | 2804438           | s                 | rec    | G2583_2578 | wcaE      | CDS  |
| O157                 | 2804474           | s                 | rec    | G2583_2578 | wcaE      | CDS  |
| O157                 | 2804483           | s                 | rec    | G2583_2578 | wcaE      | CDS  |
| O157                 | 2804501           | s                 | rec    | G2583_2578 | wcaE      | CDS  |
| O157                 | 2804513           | s                 | rec    | G2583_2578 | wcaE      | CDS  |
| O157                 | 2804516           | s                 | rec    | G2583_2578 | wcaE      | CDS  |
| O157                 | 2804558           | s                 | rec    | G2583_2578 | wcaE      | CDS  |
| O157                 | 2804618           | s                 | rec    | G2583_2578 | wcaE      | CDS  |
| O157                 | 2804725           | ns                | rec    | G2583_2578 | wcaE      | CDS  |
| O157                 | 2804861           | ns                | rec    | G2583_2578 | wcaE      | CDS  |

| lineage <sup>a</sup> | site <sup>b</sup> | mutation          |        | gene       | Gene name | Type |
|----------------------|-------------------|-------------------|--------|------------|-----------|------|
|                      |                   | type <sup>c</sup> | recomb |            |           |      |
| O157                 | 2804885           | s                 | rec    | G2583_2578 | wcaE      | CDS  |
| O157                 | 2804888           | s                 | rec    | G2583_2578 | wcaE      | CDS  |
| O157                 | 2804894           | s                 | rec    | G2583_2578 | wcaE      | CDS  |
| O157                 | 2804936           | ns                | rec    | G2583_2578 | wcaE      | CDS  |
| O157                 | 2804966           | s                 | rec    | G2583_2578 | wcaE      | CDS  |
| O157                 | 2804985           | ns                | rec    | G2583_2578 | wcaE      | CDS  |
| O157                 | 2805106           | ns                | rec    | G2583_2579 | wcaD      | CDS  |
| O157                 | 2805237           | s                 | rec    | G2583_2579 | wcaD      | CDS  |
| O157                 | 2805246           | s                 | rec    | G2583_2579 | wcaD      | CDS  |
| O157                 | 2805420           | s                 | rec    | G2583_2579 | wcaD      | CDS  |
| O157                 | 2805501           | s                 | rec    | G2583_2579 | wcaD      | CDS  |
| O157                 | 2805651           | s                 | rec    | G2583_2579 | wcaD      | CDS  |
| O157                 | 2805714           | s                 | rec    | G2583_2579 | wcaD      | CDS  |
| O157                 | 2805765           | s                 | rec    | G2583_2579 | wcaD      | CDS  |
| O157                 | 2805966           | s                 | rec    | G2583_2579 | wcaD      | CDS  |
| O157                 | 2805981           | s                 | rec    | G2583_2579 | wcaD      | CDS  |
| O157                 | 2805999           | s                 | rec    | G2583_2579 | wcaD      | CDS  |
| O157                 | 2806028           | s                 | rec    | G2583_2579 | wcaD      | CDS  |
| O157                 | 2806070           | ns                | rec    | G2583_2579 | wcaD      | CDS  |
| O157                 | 2806181           | ns                | rec    | G2583_2579 | wcaD      | CDS  |
| O157                 | 2806199           | s                 | rec    | G2583_2579 | wcaD      | CDS  |
| O157                 | 2806206           | s                 | rec    | G2583_2579 | wcaD      | CDS  |
| O157                 | 2806288           | s                 | rec    | G2583_2580 | wcaC      | CDS  |
| O157                 | 2806329           | ns                | rec    | G2583_2580 | wcaC      | CDS  |
| O157                 | 2806360           | s                 | rec    | G2583_2580 | wcaC      | CDS  |
| O157                 | 2806375           | ns                | rec    | G2583_2580 | wcaC      | CDS  |
| O157                 | 2806413           | s                 | rec    | G2583_2580 | wcaC      | CDS  |
| O157                 | 2806420           | s                 | rec    | G2583_2580 | wcaC      | CDS  |
| O157                 | 2806462           | s                 | rec    | G2583_2580 | wcaC      | CDS  |
| O157                 | 2806467           | s                 | rec    | G2583_2580 | wcaC      | CDS  |
| O157                 | 2806513           | s                 | rec    | G2583_2580 | wcaC      | CDS  |
| O157                 | 2806630           | s                 | rec    | G2583_2580 | wcaC      | CDS  |
| O157                 | 2806657           | s                 | rec    | G2583_2580 | wcaC      | CDS  |
| O157                 | 2806660           | s                 | rec    | G2583_2580 | wcaC      | CDS  |
| O157                 | 2806678           | s                 | rec    | G2583_2580 | wcaC      | CDS  |
| O157                 | 2806705           | s                 | rec    | G2583_2580 | wcaC      | CDS  |
| O157                 | 2806753           | s                 | rec    | G2583_2580 | wcaC      | CDS  |
| O157                 | 2806768           | s                 | rec    | G2583_2580 | wcaC      | CDS  |
| O157                 | 2806786           | s                 | rec    | G2583_2580 | wcaC      | CDS  |
| O157                 | 2806789           | s                 | rec    | G2583_2580 | wcaC      | CDS  |
| O157                 | 2806814           | ns                | rec    | G2583_2580 | wcaC      | CDS  |
| O157                 | 2806825           | s                 | rec    | G2583_2580 | wcaC      | CDS  |
| O157                 | 2806837           | s                 | rec    | G2583_2580 | wcaC      | CDS  |
| O157                 | 2806927           | s                 | rec    | G2583_2580 | wcaC      | CDS  |
| O157                 | 2806930           | s                 | rec    | G2583_2580 | wcaC      | CDS  |

| lineage <sup>a</sup> | site <sup>b</sup> | mutation          |        | gene       | Gene name | Type |
|----------------------|-------------------|-------------------|--------|------------|-----------|------|
|                      |                   | type <sup>c</sup> | recomb |            |           |      |
| O157                 | 2806954           | s                 | rec    | G2583_2580 | wcaC      | CDS  |
| O157                 | 2806985           | ns                | rec    | G2583_2580 | wcaC      | CDS  |
| O157                 | 2806999           | s                 | rec    | G2583_2580 | wcaC      | CDS  |
| O157                 | 2807023           | s                 | rec    | G2583_2580 | wcaC      | CDS  |
| O157                 | 2807041           | s                 | rec    | G2583_2580 | wcaC      | CDS  |
| O157                 | 2807047           | s                 | rec    | G2583_2580 | wcaC      | CDS  |
| O157                 | 2807049           | s                 | rec    | G2583_2580 | wcaC      | CDS  |
| O157                 | 2807061           | s                 | rec    | G2583_2580 | wcaC      | CDS  |
| O157                 | 2807067           | ns                | rec    | G2583_2580 | wcaC      | CDS  |
| O157                 | 2807089           | s                 | rec    | G2583_2580 | wcaC      | CDS  |
| O157                 | 2807122           | s                 | rec    | G2583_2580 | wcaC      | CDS  |
| O157                 | 2807124           | s                 | rec    | G2583_2580 | wcaC      | CDS  |
| O157                 | 2807164           | s                 | rec    | G2583_2580 | wcaC      | CDS  |
| O157                 | 2807173           | s                 | rec    | G2583_2580 | wcaC      | CDS  |
| O157                 | 2807401           | s                 | rec    | G2583_2580 | wcaC      | CDS  |
| O157                 | 2807591           | ns                | rec    | G2583_2581 | wcaB      | CDS  |
| O157                 | 2807643           | s                 | rec    | G2583_2581 | wcaB      | CDS  |
| O157                 | 2807661           | s                 | rec    | G2583_2581 | wcaB      | CDS  |
| O157                 | 2807694           | s                 | rec    | G2583_2581 | wcaB      | CDS  |
| O157                 | 2807814           | s                 | rec    | G2583_2581 | wcaB      | CDS  |
| O157                 | 2807826           | s                 | rec    | G2583_2581 | wcaB      | CDS  |
| O157                 | 2807862           | s                 | rec    | G2583_2581 | wcaB      | CDS  |
| O157                 | 2807865           | s                 | rec    | G2583_2581 | wcaB      | CDS  |
| O157                 | 2807877           | s                 | rec    | G2583_2581 | wcaB      | CDS  |
| O157                 | 2807916           | s                 | rec    | G2583_2581 | wcaB      | CDS  |
| O157                 | 2807931           | i                 | rec    | intergenic |           |      |
| O157                 | 2808011           | s                 | rec    | G2583_2582 | wcaA      | CDS  |
| O157                 | 2808056           | s                 | rec    | G2583_2582 | wcaA      | CDS  |
| O157                 | 2808062           | s                 | rec    | G2583_2582 | wcaA      | CDS  |
| O157                 | 2808068           | s                 | rec    | G2583_2582 | wcaA      | CDS  |
| O157                 | 2808197           | s                 | rec    | G2583_2582 | wcaA      | CDS  |
| O157                 | 2808389           | s                 | rec    | G2583_2582 | wcaA      | CDS  |
| O157                 | 2808404           | s                 | rec    | G2583_2582 | wcaA      | CDS  |
| O157                 | 2808467           | s                 | rec    | G2583_2582 | wcaA      | CDS  |
| O157                 | 2808476           | s                 | rec    | G2583_2582 | wcaA      | CDS  |
| O157                 | 2808491           | s                 | rec    | G2583_2582 | wcaA      | CDS  |
| O157                 | 2808533           | s                 | rec    | G2583_2582 | wcaA      | CDS  |
| O157                 | 2808584           | s                 | rec    | G2583_2582 | wcaA      | CDS  |
| O157                 | 2808587           | s                 | rec    | G2583_2582 | wcaA      | CDS  |
| O157                 | 2808780           | i                 | rec    | intergenic |           |      |
| O157                 | 2808861           | i                 | rec    | intergenic |           |      |
| O157                 | 2808970           | s                 | rec    | G2583_2583 | wzc       | CDS  |
| O157                 | 2809120           | s                 | rec    | G2583_2583 | wzc       | CDS  |
| O157                 | 2809139           | ns                | rec    | G2583_2583 | wzc       | CDS  |
| O157                 | 2809168           | s                 | rec    | G2583_2583 | wzc       | CDS  |

| lineage <sup>a</sup> | site <sup>b</sup> | mutation          |        | gene       | Gene name | Type |
|----------------------|-------------------|-------------------|--------|------------|-----------|------|
|                      |                   | type <sup>c</sup> | recomb |            |           |      |
| O157                 | 2809192           | s                 | rec    | G2583_2583 | wzc       | CDS  |
| O157                 | 2809246           | s                 | rec    | G2583_2583 | wzc       | CDS  |
| O157                 | 2809657           | s                 | rec    | G2583_2583 | wzc       | CDS  |
| O157                 | 2809672           | s                 | rec    | G2583_2583 | wzc       | CDS  |
| O157                 | 2809702           | s                 | rec    | G2583_2583 | wzc       | CDS  |
| O157                 | 2809723           | s                 | rec    | G2583_2583 | wzc       | CDS  |
| O157                 | 2809828           | s                 | rec    | G2583_2583 | wzc       | CDS  |
| O157                 | 2809915           | s                 | rec    | G2583_2583 | wzc       | CDS  |
| O157                 | 2809924           | s                 | rec    | G2583_2583 | wzc       | CDS  |
| O157                 | 2809951           | s                 | rec    | G2583_2583 | wzc       | CDS  |
| O157                 | 2810011           | s                 | rec    | G2583_2583 | wzc       | CDS  |
| O157                 | 2810224           | s                 | rec    | G2583_2583 | wzc       | CDS  |
| O157                 | 2810491           | ns                | rec    | G2583_2583 | wzc       | CDS  |
| O157                 | 2810530           | s                 | rec    | G2583_2583 | wzc       | CDS  |
| O157                 | 2810551           | ns                | rec    | G2583_2583 | wzc       | CDS  |
| O157                 | 2810553           | ns                | rec    | G2583_2583 | wzc       | CDS  |
| O157                 | 2810585           | ns                | rec    | G2583_2583 | wzc       | CDS  |
| O157                 | 2810599           | s                 | rec    | G2583_2583 | wzc       | CDS  |
| O157                 | 2810611           | s                 | rec    | G2583_2583 | wzc       | CDS  |
| O157                 | 2810626           | s                 | rec    | G2583_2583 | wzc       | CDS  |
| O157                 | 2810635           | s                 | rec    | G2583_2583 | wzc       | CDS  |
| O157                 | 2810713           | s                 | rec    | G2583_2583 | wzc       | CDS  |
| O157                 | 2810899           | s                 | rec    | G2583_2583 | wzc       | CDS  |
| O157                 | 2810905           | s                 | rec    | G2583_2583 | wzc       | CDS  |
| O157                 | 2810961           | s                 | rec    | G2583_2583 | wzc       | CDS  |
| O157                 | 2811387           | s                 | rec    | G2583_2584 | wzb       | CDS  |
| O157                 | 2811644           | s                 | rec    | G2583_2585 | wza       | CDS  |
| O157                 | 2811680           | s                 | rec    | G2583_2585 | wza       | CDS  |
| O157                 | 2811709           | s                 | rec    | G2583_2585 | wza       | CDS  |
| O157                 | 2811728           | s                 | rec    | G2583_2585 | wza       | CDS  |
| O157                 | 2811758           | s                 | rec    | G2583_2585 | wza       | CDS  |
| O157                 | 2811764           | s                 | rec    | G2583_2585 | wza       | CDS  |
| O157                 | 2811776           | s                 | rec    | G2583_2585 | wza       | CDS  |
| O157                 | 2811782           | s                 | rec    | G2583_2585 | wza       | CDS  |
| O157                 | 2811902           | s                 | rec    | G2583_2585 | wza       | CDS  |
| O157                 | 2811905           | s                 | rec    | G2583_2585 | wza       | CDS  |
| O157                 | 2811911           | s                 | rec    | G2583_2585 | wza       | CDS  |
| O157                 | 2811934           | s                 | rec    | G2583_2585 | wza       | CDS  |
| O157                 | 2811950           | s                 | rec    | G2583_2585 | wza       | CDS  |
| O157                 | 2812031           | s                 | rec    | G2583_2585 | wza       | CDS  |
| O157                 | 2812058           | s                 | rec    | G2583_2585 | wza       | CDS  |
| O157                 | 2812073           | s                 | rec    | G2583_2585 | wza       | CDS  |
| O157                 | 2812088           | s                 | rec    | G2583_2585 | wza       | CDS  |
| O157                 | 2812091           | s                 | rec    | G2583_2585 | wza       | CDS  |
| O157                 | 2812103           | s                 | rec    | G2583_2585 | wza       | CDS  |

| lineage <sup>a</sup> | site <sup>b</sup> | mutation          |        | gene       | Gene name | Type |
|----------------------|-------------------|-------------------|--------|------------|-----------|------|
|                      |                   | type <sup>c</sup> | recomb |            |           |      |
| O157                 | 2812109           | s                 | rec    | G2583_2585 | wza       | CDS  |
| O157                 | 2812208           | s                 | rec    | G2583_2585 | wza       | CDS  |
| O157                 | 2812211           | s                 | rec    | G2583_2585 | wza       | CDS  |
| O157                 | 2812238           | s                 | rec    | G2583_2585 | wza       | CDS  |
| O157                 | 2812244           | s                 | rec    | G2583_2585 | wza       | CDS  |
| O157                 | 2812340           | s                 | rec    | G2583_2585 | wza       | CDS  |
| O157                 | 2812349           | s                 | rec    | G2583_2585 | wza       | CDS  |
| O157                 | 2812385           | s                 | rec    | G2583_2585 | wza       | CDS  |
| O157                 | 2812852           | i                 | rec    | intergenic |           |      |
| O157                 | 2812863           | i                 | rec    | intergenic |           |      |
| O157                 | 2812864           | i                 | rec    | intergenic |           |      |
| O157                 | 2812871           | i                 | rec    | intergenic |           |      |
| O157                 | 2813118           | i                 | rec    | intergenic |           |      |
| EDL933               | 2883374           | ins               |        | intergenic |           |      |
| O157                 | 2813954           | s                 | rec    | G2583_2586 | yegH      | CDS  |
| O157                 | 2814008           | s                 | rec    | G2583_2586 | yegH      | CDS  |
| O157                 | 2814011           | s                 | rec    | G2583_2586 | yegH      | CDS  |
| O157                 | 2814062           | s                 | rec    | G2583_2586 | yegH      | CDS  |
| O157                 | 2814242           | s                 | rec    | G2583_2586 | yegH      | CDS  |
| O157                 | 2814245           | s                 | rec    | G2583_2586 | yegH      | CDS  |
| O157                 | 2814293           | s                 | rec    | G2583_2586 | yegH      | CDS  |
| O157                 | 2814296           | s                 | rec    | G2583_2586 | yegH      | CDS  |
| O157                 | 2814299           | s                 | rec    | G2583_2586 | yegH      | CDS  |
| O157                 | 2814308           | s                 | rec    | G2583_2586 | yegH      | CDS  |
| O157                 | 2814345           | s                 | rec    | G2583_2586 | yegH      | CDS  |
| O157                 | 2814353           | s                 | rec    | G2583_2586 | yegH      | CDS  |
| O157                 | 2814356           | s                 | rec    | G2583_2586 | yegH      | CDS  |
| O157                 | 2814389           | s                 | rec    | G2583_2586 | yegH      | CDS  |
| O157                 | 2814464           | s                 | rec    | G2583_2586 | yegH      | CDS  |
| O157                 | 2814707           | s                 | rec    | G2583_2586 | yegH      | CDS  |
| O157                 | 2814716           | s                 | rec    | G2583_2586 | yegH      | CDS  |
| O157                 | 2815436           | s                 | rec    | G2583_2588 | -         | CDS  |
| O157                 | 2815457           | s                 | rec    | G2583_2588 | -         | CDS  |
| O157                 | 2815509           | s                 | rec    | G2583_2588 | -         | CDS  |
| O157                 | 2815511           | s                 | rec    | G2583_2588 | -         | CDS  |
| O157                 | 2815530           | ns                | rec    | G2583_2588 | -         | CDS  |
| O157                 | 2815583           | i                 | rec    | intergenic |           |      |
| O157                 | 2815594           | i                 | rec    | intergenic |           |      |
| O157                 | 2815595           | i                 | rec    | intergenic |           |      |
| O157                 | 2815798           | ns                | rec    | G2583_2589 | asmA      | CDS  |
| O157                 | 2815810           | ns                | rec    | G2583_2589 | asmA      | CDS  |
| O157                 | 2815811           | ns                | rec    | G2583_2589 | asmA      | CDS  |
| O157                 | 2815816           | s                 | rec    | G2583_2589 | asmA      | CDS  |
| O157                 | 2815828           | s                 | rec    | G2583_2589 | asmA      | CDS  |
| O157                 | 2815831           | ns                | rec    | G2583_2589 | asmA      | CDS  |



| lineage <sup>a</sup> | site <sup>b</sup> | mutation          |        | gene       | Gene name | Type |
|----------------------|-------------------|-------------------|--------|------------|-----------|------|
|                      |                   | type <sup>c</sup> | recomb |            |           |      |
| O157                 | 2815833           | ns                | rec    | G2583_2589 | asmA      | CDS  |
| O157                 | 2815834           | s                 | rec    | G2583_2589 | asmA      | CDS  |
| O157                 | 2815837           | s                 | rec    | G2583_2589 | asmA      | CDS  |
| O157                 | 2815867           | ns                | rec    | G2583_2589 | asmA      | CDS  |
| O157                 | 2815870           | s                 | rec    | G2583_2589 | asmA      | CDS  |
| O157                 | 2815883           | ns                | rec    | G2583_2589 | asmA      | CDS  |
| O157                 | 2815885           | s                 | rec    | G2583_2589 | asmA      | CDS  |
| O157                 | 2815888           | ns                | rec    | G2583_2589 | asmA      | CDS  |
| O157                 | 2815889           | ns                | rec    | G2583_2589 | asmA      | CDS  |
| O157                 | 2815894           | ns                | rec    | G2583_2589 | asmA      | CDS  |
| O157                 | 2815896           | ns                | rec    | G2583_2589 | asmA      | CDS  |
| O157                 | 2815908           | ns                | rec    | G2583_2589 | asmA      | CDS  |
| O157                 | 2815909           | s                 | rec    | G2583_2589 | asmA      | CDS  |
| O157                 | 2816086           | s                 | rec    | G2583_2589 | asmA      | CDS  |
| O157                 | 2816091           | ns                | rec    | G2583_2589 | asmA      | CDS  |
| O157                 | 2816172           | s                 | rec    | G2583_2589 | asmA      | CDS  |
| O157                 | 2816224           | s                 | rec    | G2583_2589 | asmA      | CDS  |
| O157                 | 2816332           | s                 | rec    | G2583_2589 | asmA      | CDS  |
| O157                 | 2816482           | s                 | rec    | G2583_2589 | asmA      | CDS  |
| O157                 | 2816491           | s                 | rec    | G2583_2589 | asmA      | CDS  |
| O157                 | 2816530           | s                 | rec    | G2583_2589 | asmA      | CDS  |
| O157                 | 2816554           | s                 | rec    | G2583_2589 | asmA      | CDS  |
| O157                 | 2816605           | s                 | rec    | G2583_2589 | asmA      | CDS  |
| O157                 | 2816708           | ns                | rec    | G2583_2589 | asmA      | CDS  |
| O157                 | 2816770           | s                 | rec    | G2583_2589 | asmA      | CDS  |
| O157                 | 2816896           | s                 | rec    | G2583_2589 | asmA      | CDS  |
| O157                 | 2817529           | s                 | rec    | G2583_2590 | dcd       | CDS  |
| O157                 | 2817787           | s                 | rec    | G2583_2590 | dcd       | CDS  |
| O157                 | 2817831           | ns                | rec    | G2583_2590 | dcd       | CDS  |
| O157                 | 2817832           | s                 | rec    | G2583_2590 | dcd       | CDS  |
| O157                 | 2817835           | s                 | rec    | G2583_2590 | dcd       | CDS  |
| O157                 | 2817958           | s                 | rec    | G2583_2590 | dcd       | CDS  |
| O157                 | 2818152           | i                 | rec    | intergenic |           |      |
| EDL933               | 2889112           | ins               |        | intergenic |           |      |
| EDL933               | 2889119           | ins               |        | intergenic |           |      |
| O157                 | 2818966           | i                 | rec    | intergenic |           |      |
| O157                 | 2818967           | i                 | rec    | intergenic |           |      |
| O157                 | 2818978           | i                 | rec    | intergenic |           |      |
| O157                 | 2818989           | i                 | rec    | intergenic |           |      |
| O157                 | 2819199           | s                 | rec    | G2583_2592 | yegE      | CDS  |
| O157                 | 2819310           | s                 | rec    | G2583_2592 | yegE      | CDS  |
| O157                 | 2819313           | s                 | rec    | G2583_2592 | yegE      | CDS  |
| O157                 | 2819328           | s                 | rec    | G2583_2592 | yegE      | CDS  |
| O157                 | 2819391           | ns                | rec    | G2583_2592 | yegE      | CDS  |
| O157                 | 2819570           | ins               | rec    | G2583_2592 | yegE      | CDS  |

| lineage <sup>a</sup> | site <sup>b</sup> | mutation          |        | gene       | Gene name | Type |
|----------------------|-------------------|-------------------|--------|------------|-----------|------|
|                      |                   | type <sup>c</sup> | recomb |            |           |      |
| O157                 | 2819752           | s                 | rec    | G2583_2592 | yegE      | CDS  |
| O157                 | 2819836           | s                 | rec    | G2583_2592 | yegE      | CDS  |
| O157                 | 2820022           | s                 | rec    | G2583_2592 | yegE      | CDS  |
| O157                 | 2820034           | s                 | rec    | G2583_2592 | yegE      | CDS  |
| Sakai                | 2820047           | ins               |        | G2583_2592 | yegE      | CDS  |
| O157                 | 2820050           | s                 | rec    | G2583_2592 | yegE      | CDS  |
| O157                 | 2820062           | s                 | rec    | G2583_2592 | yegE      | CDS  |
| O157                 | 2820155           | s                 | rec    | G2583_2592 | yegE      | CDS  |
| O157                 | 2820299           | s                 | rec    | G2583_2592 | yegE      | CDS  |
| O157                 | 2820383           | s                 | rec    | G2583_2592 | yegE      | CDS  |
| O157                 | 2820401           | s                 | rec    | G2583_2592 | yegE      | CDS  |
| O157                 | 2820410           | s                 | rec    | G2583_2592 | yegE      | CDS  |
| O157                 | 2820452           | s                 | rec    | G2583_2592 | yegE      | CDS  |
| O157                 | 2820453           | s                 | rec    | G2583_2592 | yegE      | CDS  |
| O157                 | 2820512           | s                 | rec    | G2583_2592 | yegE      | CDS  |
| O157                 | 2820569           | s                 | rec    | G2583_2592 | yegE      | CDS  |
| O157                 | 2820572           | s                 | rec    | G2583_2592 | yegE      | CDS  |
| O157                 | 2820590           | s                 | rec    | G2583_2592 | yegE      | CDS  |
| O157                 | 2820596           | s                 | rec    | G2583_2592 | yegE      | CDS  |
| O157                 | 2820605           | s                 | rec    | G2583_2592 | yegE      | CDS  |
| O157                 | 2820620           | s                 | rec    | G2583_2592 | yegE      | CDS  |
| O157                 | 2820710           | s                 | rec    | G2583_2592 | yegE      | CDS  |
| O157                 | 2820713           | s                 | rec    | G2583_2592 | yegE      | CDS  |
| O157                 | 2820722           | s                 | rec    | G2583_2592 | yegE      | CDS  |
| O157                 | 2820737           | s                 | rec    | G2583_2592 | yegE      | CDS  |
| O157                 | 2820740           | s                 | rec    | G2583_2592 | yegE      | CDS  |
| O157                 | 2820743           | s                 | rec    | G2583_2592 | yegE      | CDS  |
| O157                 | 2821037           | s                 | rec    | G2583_2592 | yegE      | CDS  |
| O157                 | 2821091           | s                 | rec    | G2583_2592 | yegE      | CDS  |
| O157                 | 2821094           | s                 | rec    | G2583_2592 | yegE      | CDS  |
| O157                 | 2821100           | s                 | rec    | G2583_2592 | yegE      | CDS  |
| O157                 | 2821190           | s                 | rec    | G2583_2592 | yegE      | CDS  |
| O157                 | 2821208           | s                 | rec    | G2583_2592 | yegE      | CDS  |
| O157                 | 2821905           | ns                | rec    | G2583_2592 | yegE      | CDS  |
| O157                 | 2822063           | s                 | rec    | G2583_2592 | yegE      | CDS  |
| O157                 | 2822075           | ns                | rec    | G2583_2592 | yegE      | CDS  |
| O157                 | 2822110           | ns                | rec    | G2583_2592 | yegE      | CDS  |
| O157                 | 2822117           | s                 | rec    | G2583_2592 | yegE      | CDS  |
| O157                 | 2822123           | s                 | rec    | G2583_2592 | yegE      | CDS  |
| O157                 | 2822126           | s                 | rec    | G2583_2592 | yegE      | CDS  |
| O157                 | 2822127           | ns                | rec    | G2583_2592 | yegE      | CDS  |
| O157                 | 2822132           | s                 | rec    | G2583_2592 | yegE      | CDS  |
| O157                 | 2822352           | ns                | rec    | G2583_2592 | yegE      | CDS  |
| O157                 | 2822369           | ns                | rec    | G2583_2592 | yegE      | CDS  |
| O157                 | 2822403           | ns                | rec    | G2583_2592 | yegE      | CDS  |

| lineage <sup>a</sup> | site <sup>b</sup> | mutation          |        | gene       | Gene name | Type |
|----------------------|-------------------|-------------------|--------|------------|-----------|------|
|                      |                   | type <sup>c</sup> | recomb |            |           |      |
| O157                 | 2822518           | i                 | rec    | intergenic |           |      |
| O157                 | 2822548           | s                 | rec    | G2583_2593 | alkA      | CDS  |
| O157                 | 2822707           | s                 | rec    | G2583_2593 | alkA      | CDS  |
| O157                 | 2822713           | s                 | rec    | G2583_2593 | alkA      | CDS  |
| O157                 | 2822770           | s                 | rec    | G2583_2593 | alkA      | CDS  |
| O157                 | 2822773           | s                 | rec    | G2583_2593 | alkA      | CDS  |
| O157                 | 2822776           | s                 | rec    | G2583_2593 | alkA      | CDS  |
| O157                 | 2822779           | s                 | rec    | G2583_2593 | alkA      | CDS  |
| O157                 | 2822863           | s                 | rec    | G2583_2593 | alkA      | CDS  |
| O157                 | 2822890           | s                 | rec    | G2583_2593 | alkA      | CDS  |
| O157                 | 2822962           | s                 | rec    | G2583_2593 | alkA      | CDS  |
| O157                 | 2823034           | s                 | rec    | G2583_2593 | alkA      | CDS  |
| O157                 | 2823054           | ns                | rec    | G2583_2593 | alkA      | CDS  |
| O157                 | 2823092           | ns                | rec    | G2583_2593 | alkA      | CDS  |
| O157                 | 2823138           | ns                | rec    | G2583_2593 | alkA      | CDS  |
| O157                 | 2823166           | s                 | rec    | G2583_2593 | alkA      | CDS  |
| O157                 | 2823175           | s                 | rec    | G2583_2593 | alkA      | CDS  |
| O157                 | 2823185           | ns                | rec    | G2583_2593 | alkA      | CDS  |
| O157                 | 2823284           | ns                | rec    | G2583_2593 | alkA      | CDS  |
| O157                 | 2823285           | ns                | rec    | G2583_2593 | alkA      | CDS  |
| O157                 | 2823289           | s                 | rec    | G2583_2593 | alkA      | CDS  |
| O157                 | 2823307           | s                 | rec    | G2583_2593 | alkA      | CDS  |
| O157                 | 2823554           | ns                | rec    | G2583_2594 | yegD      | CDS  |
| O157                 | 2823556           | ns                | rec    | G2583_2594 | yegD      | CDS  |
| O157                 | 2823709           | s                 | rec    | G2583_2594 | yegD      | CDS  |
| O157                 | 2823736           | s                 | rec    | G2583_2594 | yegD      | CDS  |
| O157                 | 2823814           | s                 | rec    | G2583_2594 | yegD      | CDS  |
| O157                 | 2823940           | s                 | rec    | G2583_2594 | yegD      | CDS  |
| O157                 | 2823943           | s                 | rec    | G2583_2594 | yegD      | CDS  |
| O157                 | 2823956           | ns                | rec    | G2583_2594 | yegD      | CDS  |
| O157                 | 2823976           | s                 | rec    | G2583_2594 | yegD      | CDS  |
| O157                 | 2824003           | s                 | rec    | G2583_2594 | yegD      | CDS  |
| O157                 | 2824022           | ns                | rec    | G2583_2594 | yegD      | CDS  |
| O157                 | 2824033           | s                 | rec    | G2583_2594 | yegD      | CDS  |
| O157                 | 2824066           | s                 | rec    | G2583_2594 | yegD      | CDS  |
| O157                 | 2824069           | s                 | rec    | G2583_2594 | yegD      | CDS  |
| O157                 | 2824071           | ns                | rec    | G2583_2594 | yegD      | CDS  |
| O157                 | 2824075           | s                 | rec    | G2583_2594 | yegD      | CDS  |
| O157                 | 2824105           | s                 | rec    | G2583_2594 | yegD      | CDS  |
| O157                 | 2824123           | s                 | rec    | G2583_2594 | yegD      | CDS  |
| O157                 | 2824126           | s                 | rec    | G2583_2594 | yegD      | CDS  |
| O157                 | 2824129           | s                 | rec    | G2583_2594 | yegD      | CDS  |
| O157                 | 2824147           | s                 | rec    | G2583_2594 | yegD      | CDS  |
| O157                 | 2824243           | s                 | rec    | G2583_2594 | yegD      | CDS  |
| O157                 | 2824288           | s                 | rec    | G2583_2594 | yegD      | CDS  |

| lineage <sup>a</sup> | site <sup>b</sup> | mutation          |        | gene       | Gene name | Type |
|----------------------|-------------------|-------------------|--------|------------|-----------|------|
|                      |                   | type <sup>c</sup> | recomb |            |           |      |
| O157                 | 2824312           | s                 | rec    | G2583_2594 | yegD      | CDS  |
| O157                 | 2824313           | s                 | rec    | G2583_2594 | yegD      | CDS  |
| O157                 | 2824315           | s                 | rec    | G2583_2594 | yegD      | CDS  |
| O157                 | 2824321           | s                 | rec    | G2583_2594 | yegD      | CDS  |
| O157                 | 2824323           | ns                | rec    | G2583_2594 | yegD      | CDS  |
| O157                 | 2824487           | s                 | rec    | G2583_2594 | yegD      | CDS  |
| O157                 | 2824531           | s                 | rec    | G2583_2594 | yegD      | CDS  |
| O157                 | 2824555           | s                 | rec    | G2583_2594 | yegD      | CDS  |
| O157                 | 2824671           | ns                | rec    | G2583_2594 | yegD      | CDS  |
| O157                 | 2824690           | s                 | rec    | G2583_2594 | yegD      | CDS  |
| O157                 | 2824693           | s                 | rec    | G2583_2594 | yegD      | CDS  |
| O157                 | 2824738           | s                 | rec    | G2583_2594 | yegD      | CDS  |
| O157                 | 2825014           | ns                | rec    | G2583_2595 | yegl      | CDS  |
| O157                 | 2825048           | ns                | rec    | G2583_2595 | yegl      | CDS  |
| O157                 | 2825050           | ns                | rec    | G2583_2595 | yegl      | CDS  |
| O157                 | 2825066           | ns                | rec    | G2583_2595 | yegl      | CDS  |
| O157                 | 2825153           | s                 | rec    | G2583_2595 | yegl      | CDS  |
| O157                 | 2825156           | s                 | rec    | G2583_2595 | yegl      | CDS  |
| O157                 | 2825168           | s                 | rec    | G2583_2595 | yegl      | CDS  |
| O157                 | 2825180           | s                 | rec    | G2583_2595 | yegl      | CDS  |
| O157                 | 2825198           | s                 | rec    | G2583_2595 | yegl      | CDS  |
| O157                 | 2825201           | s                 | rec    | G2583_2595 | yegl      | CDS  |
| O157                 | 2825246           | s                 | rec    | G2583_2595 | yegl      | CDS  |
| O157                 | 2825324           | s                 | rec    | G2583_2595 | yegl      | CDS  |
| O157                 | 2825342           | s                 | rec    | G2583_2595 | yegl      | CDS  |
| O157                 | 2825348           | s                 | rec    | G2583_2595 | yegl      | CDS  |
| O157                 | 2825351           | s                 | rec    | G2583_2595 | yegl      | CDS  |
| O157                 | 2825398           | ns                | rec    | G2583_2595 | yegl      | CDS  |
| O157                 | 2825517           | ns                | rec    | G2583_2595 | yegl      | CDS  |
| O157                 | 2825608           | s                 | rec    | G2583_2595 | yegl      | CDS  |
| O157                 | 2825617           | ns                | rec    | G2583_2595 | yegl      | CDS  |
| O157                 | 2825638           | ns                | rec    | G2583_2595 | yegl      | CDS  |
| O157                 | 2825722           | ns                | rec    | G2583_2595 | yegl      | CDS  |
| O157                 | 2825783           | ns                | rec    | G2583_2595 | yegl      | CDS  |
| O157                 | 2825785           | ns                | rec    | G2583_2595 | yegl      | CDS  |
| O157                 | 2825845           | ns                | rec    | G2583_2595 | yegl      | CDS  |
| O157                 | 2825861           | s                 | rec    | G2583_2595 | yegl      | CDS  |
| O157                 | 2825871           | ns                | rec    | G2583_2595 | yegl      | CDS  |
| O157                 | 2825876           | s                 | rec    | G2583_2595 | yegl      | CDS  |
| O157                 | 2825924           | ns                | rec    | G2583_2595 | yegl      | CDS  |
| O157                 | 2825925           | ns                | rec    | G2583_2595 | yegl      | CDS  |
| O157                 | 2825936           | s                 | rec    | G2583_2595 | yegl      | CDS  |
| O157                 | 2825951           | s                 | rec    | G2583_2595 | yegl      | CDS  |
| O157                 | 2825964           | ns                | rec    | G2583_2595 | yegl      | CDS  |
| O157                 | 2825972           | s                 | rec    | G2583_2595 | yegl      | CDS  |

| lineage <sup>a</sup> | site <sup>b</sup> | mutation          |        | gene       | Gene name | Type |
|----------------------|-------------------|-------------------|--------|------------|-----------|------|
|                      |                   | type <sup>c</sup> | recomb |            |           |      |
| O157                 | 2825987           | s                 | rec    | G2583_2595 | yegI      | CDS  |
| O157                 | 2825990           | s                 | rec    | G2583_2595 | yegI      | CDS  |
| O157                 | 2826251           | s                 | rec    | G2583_2595 | yegI      | CDS  |
| O157                 | 2826401           | s                 | rec    | G2583_2595 | yegI      | CDS  |
| O157                 | 2826452           | s                 | rec    | G2583_2595 | yegI      | CDS  |
| O157                 | 2826491           | s                 | rec    | G2583_2595 | yegI      | CDS  |
| O157                 | 2826516           | ns                | rec    | G2583_2595 | yegI      | CDS  |
| O157                 | 2826628           | s                 | rec    | G2583_2595 | yegI      | CDS  |
| O157                 | 2826635           | s                 | rec    | G2583_2595 | yegI      | CDS  |
| O157                 | 2826720           | ns                | rec    | G2583_2595 | yegI      | CDS  |
| O157                 | 2826728           | ns                | rec    | G2583_2595 | yegI      | CDS  |
| O157                 | 2826730           | ns                | rec    | G2583_2595 | yegI      | CDS  |
| O157                 | 2826746           | s                 | rec    | G2583_2595 | yegI      | CDS  |
| O157                 | 2826752           | s                 | rec    | G2583_2595 | yegI      | CDS  |
| O157                 | 2826755           | s                 | rec    | G2583_2595 | yegI      | CDS  |
| O157                 | 2826840           | ns                | rec    | G2583_2596 | yegK      | CDS  |
| O157                 | 2826877           | s                 | rec    | G2583_2596 | yegK      | CDS  |
| O157                 | 2826883           | s                 | rec    | G2583_2596 | yegK      | CDS  |
| O157                 | 2826922           | s                 | rec    | G2583_2596 | yegK      | CDS  |
| O157                 | 2826946           | s                 | rec    | G2583_2596 | yegK      | CDS  |
| O157                 | 2826958           | s                 | rec    | G2583_2596 | yegK      | CDS  |
| O157                 | 2826993           | s                 | rec    | G2583_2596 | yegK      | CDS  |
| O157                 | 2827015           | s                 | rec    | G2583_2596 | yegK      | CDS  |
| O157                 | 2827046           | ns                | rec    | G2583_2596 | yegK      | CDS  |
| O157                 | 2827085           | ns                | rec    | G2583_2596 | yegK      | CDS  |
| O157                 | 2827273           | s                 | rec    | G2583_2596 | yegK      | CDS  |
| O157                 | 2827330           | s                 | rec    | G2583_2596 | yegK      | CDS  |
| O157                 | 2827446           | ns                | rec    | G2583_2596 | yegK      | CDS  |
| O157                 | 2827447           | ns                | rec    | G2583_2596 | yegK      | CDS  |
| O157                 | 2827449           | ns                | rec    | G2583_2596 | yegK      | CDS  |
| O157                 | 2827450           | s                 | rec    | G2583_2596 | yegK      | CDS  |
| O157                 | 2827453           | ns                | rec    | G2583_2596 | yegK      | CDS  |
| O157                 | 2827455           | ns                | rec    | G2583_2596 | yegK      | CDS  |
| O157                 | 2827457           | ns                | rec    | G2583_2596 | yegK      | CDS  |
| O157                 | 2827458           | ns                | rec    | G2583_2596 | yegK      | CDS  |
| O157                 | 2827461           | s                 | rec    | G2583_2596 | yegK      | CDS  |
| O157                 | 2827608           | s                 | rec    | G2583_2597 | yegL      | CDS  |
| O157                 | 2827650           | s                 | rec    | G2583_2597 | yegL      | CDS  |
| O157                 | 2827677           | s                 | rec    | G2583_2597 | yegL      | CDS  |
| O157                 | 2827698           | ns                | rec    | G2583_2597 | yegL      | CDS  |
| O157                 | 2827700           | ns                | rec    | G2583_2597 | yegL      | CDS  |
| O157                 | 2827713           | s                 | rec    | G2583_2597 | yegL      | CDS  |
| O157                 | 2827716           | s                 | rec    | G2583_2597 | yegL      | CDS  |
| O157                 | 2827725           | s                 | rec    | G2583_2597 | yegL      | CDS  |
| O157                 | 2827731           | s                 | rec    | G2583_2597 | yegL      | CDS  |

| lineage <sup>a</sup> | site <sup>b</sup> | mutation          |        | gene       | Gene name | Type       |
|----------------------|-------------------|-------------------|--------|------------|-----------|------------|
|                      |                   | type <sup>c</sup> | recomb |            |           |            |
| O157                 | 2827737           | ns                | rec    | G2583_2597 | yegL      | CDS        |
| O157                 | 2827959           | s                 | rec    | G2583_2597 | yegL      | CDS        |
| EDL933               | 2898460           | ins               |        | intergenic |           |            |
| O157                 | 2828393           | nc                | rec    | G2583_2598 | -         | pseudogene |
| O157                 | 2828395           | nc                | rec    | G2583_2598 | -         | pseudogene |
| O157                 | 2828429           | nc                | rec    | G2583_2598 | -         | pseudogene |
| O157                 | 2828515           | nc                | rec    | G2583_2598 | -         | pseudogene |
| O157                 | 2828523           | nc                | rec    | G2583_2598 | -         | pseudogene |
| O157                 | 2828568           | i                 | rec    | intergenic |           |            |
| O157                 | 2828603           | i                 | rec    | intergenic |           |            |
| O157                 | 2828606           | i                 | rec    | intergenic |           |            |
| O157                 | 2828609           | i                 | rec    | intergenic |           |            |
| O157                 | 2828622           | i                 | rec    | intergenic |           |            |
| O157                 | 2828625           | i                 | rec    | intergenic |           |            |
| O157                 | 2828626           | i                 | rec    | intergenic |           |            |
| O157                 | 2828628           | i                 | rec    | intergenic |           |            |
| O157                 | 2828630           | i                 | rec    | intergenic |           |            |
| O157                 | 2828632           | i                 | rec    | intergenic |           |            |
| O157                 | 2828645           | i                 | rec    | intergenic |           |            |
| O157                 | 2828646           | i                 | rec    | intergenic |           |            |
| O157                 | 2828712           | i                 | rec    | intergenic |           |            |
| O157                 | 2828721           | nc                | rec    | G2583_2599 | -         | pseudogene |
| O157                 | 2828725           | nc                | rec    | G2583_2599 | -         | pseudogene |
| O157                 | 2828727           | nc                | rec    | G2583_2599 | -         | pseudogene |
| O157                 | 2828792           | nc                | rec    | G2583_2599 | -         | pseudogene |
| O157                 | 2828795           | nc                | rec    | G2583_2599 | -         | pseudogene |
| O157                 | 2828799           | nc                | rec    | G2583_2599 | -         | pseudogene |
| O157                 | 2828804           | nc                | rec    | G2583_2599 | -         | pseudogene |
| O157                 | 2828807           | nc                | rec    | G2583_2599 | -         | pseudogene |
| O157                 | 2828830           | nc                | rec    | G2583_2599 | -         | pseudogene |
| O157                 | 2828831           | nc                | rec    | G2583_2599 | -         | pseudogene |
| O157                 | 2828832           | nc                | rec    | G2583_2599 | -         | pseudogene |
| O157                 | 2828833           | nc                | rec    | G2583_2599 | -         | pseudogene |
| O157                 | 2828860           | i                 | rec    | intergenic |           |            |
| O157                 | 2828931           | i                 | rec    | intergenic |           |            |
| O157                 | 2828934           | i                 | rec    | intergenic |           |            |
| O157                 | 2828936           | i                 | rec    | intergenic |           |            |
| O157                 | 2828937           | i                 | rec    | intergenic |           |            |
| O157                 | 2828950           | i                 | rec    | intergenic |           |            |
| O157                 | 2828953           | i                 | rec    | intergenic |           |            |
| O157                 | 2828954           | i                 | rec    | intergenic |           |            |
| O157                 | 2828956           | i                 | rec    | intergenic |           |            |
| O157                 | 2828957           | i                 | rec    | intergenic |           |            |
| O157                 | 2828974           | i                 | rec    | intergenic |           |            |
| O157                 | 2828978           | i                 | rec    | intergenic |           |            |

| lineage <sup>a</sup> | site <sup>b</sup> | mutation          |        | gene       | Gene name | Type |
|----------------------|-------------------|-------------------|--------|------------|-----------|------|
|                      |                   | type <sup>c</sup> | recomb |            |           |      |
| O157                 | 2828983           | i                 | rec    | intergenic |           |      |
| EDL933               | 2899359           | ins               |        | intergenic |           |      |
| EDL933               | 2899514           | i                 |        | intergenic |           |      |
| O157                 | 2829494           | s                 | rec    | G2583_2600 | mdtA      | CDS  |
| O157                 | 2829633           | ns                | rec    | G2583_2600 | mdtA      | CDS  |
| O157                 | 2829722           | s                 | rec    | G2583_2600 | mdtA      | CDS  |
| O157                 | 2829782           | s                 | rec    | G2583_2600 | mdtA      | CDS  |
| O157                 | 2830424           | s                 | rec    | G2583_2600 | mdtA      | CDS  |
| O157                 | 2830427           | s                 | rec    | G2583_2600 | mdtA      | CDS  |
| O157                 | 2830702           | s                 | rec    | G2583_2601 | mdtB      | CDS  |
| O157                 | 2830724           | ns                | rec    | G2583_2601 | mdtB      | CDS  |
| O157                 | 2830852           | s                 | rec    | G2583_2601 | mdtB      | CDS  |
| O157                 | 2830951           | s                 | rec    | G2583_2601 | mdtB      | CDS  |
| O157                 | 2831002           | s                 | rec    | G2583_2601 | mdtB      | CDS  |
| O157                 | 2831026           | s                 | rec    | G2583_2601 | mdtB      | CDS  |
| O157                 | 2831047           | s                 | rec    | G2583_2601 | mdtB      | CDS  |
| O157                 | 2831150           | ns                | rec    | G2583_2601 | mdtB      | CDS  |
| O157                 | 2831164           | s                 | rec    | G2583_2601 | mdtB      | CDS  |
| O157                 | 2831371           | s                 | rec    | G2583_2601 | mdtB      | CDS  |
| O157                 | 2831383           | s                 | rec    | G2583_2601 | mdtB      | CDS  |
| O157                 | 2831398           | s                 | rec    | G2583_2601 | mdtB      | CDS  |
| O157                 | 2831416           | s                 | rec    | G2583_2601 | mdtB      | CDS  |
| O157                 | 2831419           | s                 | rec    | G2583_2601 | mdtB      | CDS  |
| O157                 | 2831425           | s                 | rec    | G2583_2601 | mdtB      | CDS  |
| O157                 | 2831434           | s                 | rec    | G2583_2601 | mdtB      | CDS  |
| O157                 | 2831437           | s                 | rec    | G2583_2601 | mdtB      | CDS  |
| O157                 | 2831443           | s                 | rec    | G2583_2601 | mdtB      | CDS  |
| O157                 | 2831453           | s                 | rec    | G2583_2601 | mdtB      | CDS  |
| O157                 | 2831455           | s                 | rec    | G2583_2601 | mdtB      | CDS  |
| O157                 | 2831458           | s                 | rec    | G2583_2601 | mdtB      | CDS  |
| O157                 | 2831506           | s                 | rec    | G2583_2601 | mdtB      | CDS  |
| O157                 | 2831551           | s                 | rec    | G2583_2601 | mdtB      | CDS  |
| O157                 | 2831654           | s                 | rec    | G2583_2601 | mdtB      | CDS  |
| O157                 | 2831719           | s                 | rec    | G2583_2601 | mdtB      | CDS  |
| O157                 | 2831761           | s                 | rec    | G2583_2601 | mdtB      | CDS  |
| O157                 | 2831815           | s                 | rec    | G2583_2601 | mdtB      | CDS  |
| O157                 | 2832806           | ns                | rec    | G2583_2601 | mdtB      | CDS  |
| O157                 | 2832904           | s                 | rec    | G2583_2601 | mdtB      | CDS  |
| O157                 | 2832940           | s                 | rec    | G2583_2601 | mdtB      | CDS  |
| O157                 | 2832979           | s                 | rec    | G2583_2601 | mdtB      | CDS  |
| O157                 | 2832982           | s                 | rec    | G2583_2601 | mdtB      | CDS  |
| O157                 | 2832997           | s                 | rec    | G2583_2601 | mdtB      | CDS  |
| O157                 | 2833015           | s                 | rec    | G2583_2601 | mdtB      | CDS  |
| O157                 | 2833018           | s                 | rec    | G2583_2601 | mdtB      | CDS  |
| O157                 | 2833070           | s                 | rec    | G2583_2601 | mdtB      | CDS  |

| lineage <sup>a</sup> | site <sup>b</sup> | mutation          |        | gene       | Gene name | Type |
|----------------------|-------------------|-------------------|--------|------------|-----------|------|
|                      |                   | type <sup>c</sup> | recomb |            |           |      |
| O157                 | 2833088           | ns                | rec    | G2583_2601 | mdtB      | CDS  |
| O157                 | 2833093           | s                 | rec    | G2583_2601 | mdtB      | CDS  |
| O157                 | 2833153           | s                 | rec    | G2583_2601 | mdtB      | CDS  |
| O157                 | 2833165           | s                 | rec    | G2583_2601 | mdtB      | CDS  |
| O157                 | 2833198           | s                 | rec    | G2583_2601 | mdtB      | CDS  |
| O157                 | 2833213           | s                 | rec    | G2583_2601 | mdtB      | CDS  |
| O157                 | 2833249           | s                 | rec    | G2583_2601 | mdtB      | CDS  |
| O157                 | 2833275           | ns                | rec    | G2583_2601 | mdtB      | CDS  |
| O157                 | 2833396           | s                 | rec    | G2583_2601 | mdtB      | CDS  |
| O157                 | 2833672           | s                 | rec    | G2583_2601 | mdtB      | CDS  |
| O157                 | 2833876           | s                 | rec    | G2583_2602 | mdtC      | CDS  |
| O157                 | 2834245           | s                 | rec    | G2583_2602 | mdtC      | CDS  |
| O157                 | 2834279           | s                 | rec    | G2583_2602 | mdtC      | CDS  |
| O157                 | 2834332           | s                 | rec    | G2583_2602 | mdtC      | CDS  |
| O157                 | 2834435           | ns                | rec    | G2583_2602 | mdtC      | CDS  |
| O157                 | 2834665           | s                 | rec    | G2583_2602 | mdtC      | CDS  |
| O157                 | 2834680           | s                 | rec    | G2583_2602 | mdtC      | CDS  |
| O157                 | 2834681           | s                 | rec    | G2583_2602 | mdtC      | CDS  |
| O157                 | 2834710           | s                 | rec    | G2583_2602 | mdtC      | CDS  |
| O157                 | 2834779           | s                 | rec    | G2583_2602 | mdtC      | CDS  |
| O157                 | 2834866           | s                 | rec    | G2583_2602 | mdtC      | CDS  |
| O157                 | 2834968           | s                 | rec    | G2583_2602 | mdtC      | CDS  |
| O157                 | 2835142           | s                 | rec    | G2583_2602 | mdtC      | CDS  |
| O157                 | 2835167           | s                 | rec    | G2583_2602 | mdtC      | CDS  |
| O157                 | 2835190           | s                 | rec    | G2583_2602 | mdtC      | CDS  |
| O157                 | 2835193           | s                 | rec    | G2583_2602 | mdtC      | CDS  |
| O157                 | 2835205           | s                 | rec    | G2583_2602 | mdtC      | CDS  |
| O157                 | 2835244           | s                 | rec    | G2583_2602 | mdtC      | CDS  |
| O157                 | 2835253           | s                 | rec    | G2583_2602 | mdtC      | CDS  |
| O157                 | 2835259           | s                 | rec    | G2583_2602 | mdtC      | CDS  |
| O157                 | 2835260           | s                 | rec    | G2583_2602 | mdtC      | CDS  |
| O157                 | 2835273           | ns                | rec    | G2583_2602 | mdtC      | CDS  |
| O157                 | 2835307           | s                 | rec    | G2583_2602 | mdtC      | CDS  |
| O157                 | 2835322           | s                 | rec    | G2583_2602 | mdtC      | CDS  |
| O157                 | 2835346           | s                 | rec    | G2583_2602 | mdtC      | CDS  |
| O157                 | 2835364           | s                 | rec    | G2583_2602 | mdtC      | CDS  |
| O157                 | 2835367           | s                 | rec    | G2583_2602 | mdtC      | CDS  |
| O157                 | 2835373           | s                 | rec    | G2583_2602 | mdtC      | CDS  |
| O157                 | 2835410           | ns                | rec    | G2583_2602 | mdtC      | CDS  |
| O157                 | 2835416           | s                 | rec    | G2583_2602 | mdtC      | CDS  |
| O157                 | 2835433           | s                 | rec    | G2583_2602 | mdtC      | CDS  |
| O157                 | 2835434           | s                 | rec    | G2583_2602 | mdtC      | CDS  |
| O157                 | 2835448           | s                 | rec    | G2583_2602 | mdtC      | CDS  |
| O157                 | 2835460           | s                 | rec    | G2583_2602 | mdtC      | CDS  |
| O157                 | 2835490           | s                 | rec    | G2583_2602 | mdtC      | CDS  |



| lineage <sup>a</sup> | site <sup>b</sup> | mutation          |        | gene       | Gene name | Type |
|----------------------|-------------------|-------------------|--------|------------|-----------|------|
|                      |                   | type <sup>c</sup> | recomb |            |           |      |
| O157                 | 2835550           | s                 | rec    | G2583_2602 | mdtC      | CDS  |
| O157                 | 2835553           | s                 | rec    | G2583_2602 | mdtC      | CDS  |
| O157                 | 2835592           | s                 | rec    | G2583_2602 | mdtC      | CDS  |
| O157                 | 2835610           | s                 | rec    | G2583_2602 | mdtC      | CDS  |
| O157                 | 2835616           | s                 | rec    | G2583_2602 | mdtC      | CDS  |
| O157                 | 2835628           | s                 | rec    | G2583_2602 | mdtC      | CDS  |
| O157                 | 2835634           | s                 | rec    | G2583_2602 | mdtC      | CDS  |
| O157                 | 2835685           | s                 | rec    | G2583_2602 | mdtC      | CDS  |
| O157                 | 2835700           | s                 | rec    | G2583_2602 | mdtC      | CDS  |
| O157                 | 2835709           | s                 | rec    | G2583_2602 | mdtC      | CDS  |
| O157                 | 2835712           | s                 | rec    | G2583_2602 | mdtC      | CDS  |
| O157                 | 2835799           | s                 | rec    | G2583_2602 | mdtC      | CDS  |
| O157                 | 2835802           | s                 | rec    | G2583_2602 | mdtC      | CDS  |
| O157                 | 2836105           | s                 | rec    | G2583_2602 | mdtC      | CDS  |
| O157                 | 2836123           | s                 | rec    | G2583_2602 | mdtC      | CDS  |
| O157                 | 2836126           | s                 | rec    | G2583_2602 | mdtC      | CDS  |
| O157                 | 2836135           | ns                | rec    | G2583_2602 | mdtC      | CDS  |
| O157                 | 2836138           | s                 | rec    | G2583_2602 | mdtC      | CDS  |
| O157                 | 2836150           | s                 | rec    | G2583_2602 | mdtC      | CDS  |
| O157                 | 2836165           | s                 | rec    | G2583_2602 | mdtC      | CDS  |
| O157                 | 2836183           | s                 | rec    | G2583_2602 | mdtC      | CDS  |
| O157                 | 2836189           | s                 | rec    | G2583_2602 | mdtC      | CDS  |
| O157                 | 2836192           | s                 | rec    | G2583_2602 | mdtC      | CDS  |
| O157                 | 2836234           | s                 | rec    | G2583_2602 | mdtC      | CDS  |
| O157                 | 2836252           | s                 | rec    | G2583_2602 | mdtC      | CDS  |
| O157                 | 2836279           | s                 | rec    | G2583_2602 | mdtC      | CDS  |
| O157                 | 2836285           | s                 | rec    | G2583_2602 | mdtC      | CDS  |
| O157                 | 2836303           | s                 | rec    | G2583_2602 | mdtC      | CDS  |
| O157                 | 2836309           | s                 | rec    | G2583_2602 | mdtC      | CDS  |
| O157                 | 2836315           | s                 | rec    | G2583_2602 | mdtC      | CDS  |
| O157                 | 2836318           | s                 | rec    | G2583_2602 | mdtC      | CDS  |
| O157                 | 2836339           | s                 | rec    | G2583_2602 | mdtC      | CDS  |
| O157                 | 2836342           | s                 | rec    | G2583_2602 | mdtC      | CDS  |
| O157                 | 2836393           | s                 | rec    | G2583_2602 | mdtC      | CDS  |
| O157                 | 2836396           | s                 | rec    | G2583_2602 | mdtC      | CDS  |
| O157                 | 2836468           | s                 | rec    | G2583_2602 | mdtC      | CDS  |
| O157                 | 2836486           | s                 | rec    | G2583_2602 | mdtC      | CDS  |
| O157                 | 2836501           | s                 | rec    | G2583_2602 | mdtC      | CDS  |
| O157                 | 2836567           | s                 | rec    | G2583_2602 | mdtC      | CDS  |
| O157                 | 2836603           | s                 | rec    | G2583_2602 | mdtC      | CDS  |
| O157                 | 2836738           | s                 | rec    | G2583_2602 | mdtC      | CDS  |
| O157                 | 2836750           | s                 | rec    | G2583_2602 | mdtC      | CDS  |
| O157                 | 2836763           | s                 | rec    | G2583_2602 | mdtC      | CDS  |
| O157                 | 2836792           | s                 | rec    | G2583_2602 | mdtC      | CDS  |
| O157                 | 2836798           | s                 | rec    | G2583_2602 | mdtC      | CDS  |

| lineage <sup>a</sup> | site <sup>b</sup> | mutation          |        | gene       | Gene name | Type |
|----------------------|-------------------|-------------------|--------|------------|-----------|------|
|                      |                   | type <sup>c</sup> | recomb |            |           |      |
| O157                 | 2836831           | s                 | rec    | G2583_2602 | mdtC      | CDS  |
| O157                 | 2836837           | s                 | rec    | G2583_2602 | mdtC      | CDS  |
| O157                 | 2836852           | s                 | rec    | G2583_2602 | mdtC      | CDS  |
| O157                 | 2836874           | ns                | rec    | G2583_2602 | mdtC      | CDS  |
| O157                 | 2836984           | s                 | rec    | G2583_2603 | mdtD      | CDS  |
| O157                 | 2837047           | s                 | rec    | G2583_2603 | mdtD      | CDS  |
| O157                 | 2837086           | s                 | rec    | G2583_2603 | mdtD      | CDS  |
| O157                 | 2837140           | s                 | rec    | G2583_2603 | mdtD      | CDS  |
| O157                 | 2837143           | s                 | rec    | G2583_2603 | mdtD      | CDS  |
| O157                 | 2837254           | s                 | rec    | G2583_2603 | mdtD      | CDS  |
| O157                 | 2837258           | s                 | rec    | G2583_2603 | mdtD      | CDS  |
| O157                 | 2837260           | s                 | rec    | G2583_2603 | mdtD      | CDS  |
| O157                 | 2837440           | s                 | rec    | G2583_2603 | mdtD      | CDS  |
| O157                 | 2837441           | s                 | rec    | G2583_2603 | mdtD      | CDS  |
| O157                 | 2837449           | s                 | rec    | G2583_2603 | mdtD      | CDS  |
| O157                 | 2837579           | ns                | rec    | G2583_2603 | mdtD      | CDS  |
| O157                 | 2837676           | ns                | rec    | G2583_2603 | mdtD      | CDS  |
| O157                 | 2837677           | ns                | rec    | G2583_2603 | mdtD      | CDS  |
| O157                 | 2837680           | s                 | rec    | G2583_2603 | mdtD      | CDS  |
| O157                 | 2837833           | s                 | rec    | G2583_2603 | mdtD      | CDS  |
| O157                 | 2837842           | s                 | rec    | G2583_2603 | mdtD      | CDS  |
| O157                 | 2837848           | s                 | rec    | G2583_2603 | mdtD      | CDS  |
| O157                 | 2838052           | s                 | rec    | G2583_2603 | mdtD      | CDS  |
| O157                 | 2838173           | ns                | rec    | G2583_2603 | mdtD      | CDS  |
| O157                 | 2838188           | ns                | rec    | G2583_2603 | mdtD      | CDS  |
| O157                 | 2838324           | s                 | rec    | G2583_2604 | baeS      | CDS  |
| O157                 | 2838327           | s                 | rec    | G2583_2604 | baeS      | CDS  |
| O157                 | 2838507           | s                 | rec    | G2583_2604 | baeS      | CDS  |
| O157                 | 2838609           | s                 | rec    | G2583_2604 | baeS      | CDS  |
| O157                 | 2838624           | s                 | rec    | G2583_2604 | baeS      | CDS  |
| O157                 | 2838654           | s                 | rec    | G2583_2604 | baeS      | CDS  |
| O157                 | 2838846           | s                 | rec    | G2583_2604 | baeS      | CDS  |
| O157                 | 2838852           | s                 | rec    | G2583_2604 | baeS      | CDS  |
| O157                 | 2838855           | s                 | rec    | G2583_2604 | baeS      | CDS  |
| O157                 | 2838870           | s                 | rec    | G2583_2604 | baeS      | CDS  |
| O157                 | 2838874           | s                 | rec    | G2583_2604 | baeS      | CDS  |
| O157                 | 2838876           | s                 | rec    | G2583_2604 | baeS      | CDS  |
| O157                 | 2838877           | s                 | rec    | G2583_2604 | baeS      | CDS  |
| O157                 | 2838882           | s                 | rec    | G2583_2604 | baeS      | CDS  |
| O157                 | 2838888           | s                 | rec    | G2583_2604 | baeS      | CDS  |
| O157                 | 2838894           | s                 | rec    | G2583_2604 | baeS      | CDS  |
| O157                 | 2838897           | s                 | rec    | G2583_2604 | baeS      | CDS  |
| O157                 | 2838900           | s                 | rec    | G2583_2604 | baeS      | CDS  |
| O157                 | 2838903           | s                 | rec    | G2583_2604 | baeS      | CDS  |
| O157                 | 2838936           | s                 | rec    | G2583_2604 | baeS      | CDS  |

| lineage <sup>a</sup> | site <sup>b</sup> | mutation          |        | gene       | Gene name | Type |
|----------------------|-------------------|-------------------|--------|------------|-----------|------|
|                      |                   | type <sup>c</sup> | recomb |            |           |      |
| O157                 | 2838945           | s                 | rec    | G2583_2604 | baeS      | CDS  |
| O157                 | 2839008           | s                 | rec    | G2583_2604 | baeS      | CDS  |
| O157                 | 2839011           | s                 | rec    | G2583_2604 | baeS      | CDS  |
| O157                 | 2839194           | s                 | rec    | G2583_2604 | baeS      | CDS  |
| O157                 | 2839275           | s                 | rec    | G2583_2604 | baeS      | CDS  |
| O157                 | 2839278           | s                 | rec    | G2583_2604 | baeS      | CDS  |
| O157                 | 2839299           | s                 | rec    | G2583_2604 | baeS      | CDS  |
| O157                 | 2839344           | s                 | rec    | G2583_2604 | baeS      | CDS  |
| O157                 | 2839395           | s                 | rec    | G2583_2604 | baeS      | CDS  |
| O157                 | 2839452           | s                 | rec    | G2583_2604 | baeS      | CDS  |
| O157                 | 2839464           | s                 | rec    | G2583_2604 | baeS      | CDS  |
| O157                 | 2839524           | s                 | rec    | G2583_2604 | baeS      | CDS  |
| O157                 | 2839563           | s                 | rec    | G2583_2604 | baeS      | CDS  |
| O157                 | 2839588           | s                 | rec    | G2583_2604 | baeS      | CDS  |
| O157                 | 2839638           | s                 | rec    | G2583_2604 | baeS      | CDS  |
| O157                 | 2839851           | ns                | rec    | G2583_2605 | baeR      | CDS  |
| O157                 | 2839856           | s                 | rec    | G2583_2605 | baeR      | CDS  |
| O157                 | 2839868           | s                 | rec    | G2583_2605 | baeR      | CDS  |
| O157                 | 2839871           | s                 | rec    | G2583_2605 | baeR      | CDS  |
| O157                 | 2839907           | s                 | rec    | G2583_2605 | baeR      | CDS  |
| O157                 | 2839917           | s                 | rec    | G2583_2605 | baeR      | CDS  |
| O157                 | 2839973           | s                 | rec    | G2583_2605 | baeR      | CDS  |
| O157                 | 2840003           | s                 | rec    | G2583_2605 | baeR      | CDS  |
| O157                 | 2840006           | s                 | rec    | G2583_2605 | baeR      | CDS  |
| O157                 | 2840027           | s                 | rec    | G2583_2605 | baeR      | CDS  |
| O157                 | 2840030           | s                 | rec    | G2583_2605 | baeR      | CDS  |
| O157                 | 2840033           | s                 | rec    | G2583_2605 | baeR      | CDS  |
| O157                 | 2840036           | s                 | rec    | G2583_2605 | baeR      | CDS  |
| O157                 | 2840069           | s                 | rec    | G2583_2605 | baeR      | CDS  |
| O157                 | 2840105           | s                 | rec    | G2583_2605 | baeR      | CDS  |
| O157                 | 2840135           | s                 | rec    | G2583_2605 | baeR      | CDS  |
| O157                 | 2840216           | s                 | rec    | G2583_2605 | baeR      | CDS  |
| O157                 | 2840306           | s                 | rec    | G2583_2605 | baeR      | CDS  |
| O157                 | 2840393           | s                 | rec    | G2583_2605 | baeR      | CDS  |
| O157                 | 2840467           | i                 | rec    | intergenic |           |      |
| O157                 | 2840660           | ns                | rec    | G2583_2606 | yegP      | CDS  |
| O157                 | 2840700           | s                 | rec    | G2583_2606 | yegP      | CDS  |
| O157                 | 2840724           | s                 | rec    | G2583_2606 | yegP      | CDS  |
| O157                 | 2840874           | s                 | rec    | G2583_2606 | yegP      | CDS  |
| O157                 | 2840990           | ins-12            | rec    | intergenic |           |      |
| O157                 | 2841005           | i                 | rec    | intergenic |           |      |
| O157                 | 2841008           | i                 | rec    | intergenic |           |      |
| O157                 | 2841010           | i                 | rec    | intergenic |           |      |
| O157                 | 2841011           | i                 | rec    | intergenic |           |      |
| O157                 | 2841243           | s                 | rec    | G2583_2609 | yegQ      | CDS  |

| lineage <sup>a</sup> | site <sup>b</sup> | mutation          |        | gene       | Gene name | Type       |
|----------------------|-------------------|-------------------|--------|------------|-----------|------------|
|                      |                   | type <sup>c</sup> | recomb |            |           |            |
| O157                 | 2841444           | s                 | rec    | G2583_2609 | yegQ      | CDS        |
| O157                 | 2841453           | s                 | rec    | G2583_2609 | yegQ      | CDS        |
| O157                 | 2841468           | s                 | rec    | G2583_2609 | yegQ      | CDS        |
| O157                 | 2841504           | s                 | rec    | G2583_2609 | yegQ      | CDS        |
| O157                 | 2841561           | s                 | rec    | G2583_2609 | yegQ      | CDS        |
| O157                 | 2841663           | s                 | rec    | G2583_2609 | yegQ      | CDS        |
| O157                 | 2841732           | ns                | rec    | G2583_2609 | yegQ      | CDS        |
| O157                 | 2841834           | s                 | rec    | G2583_2609 | yegQ      | CDS        |
| O157                 | 2841936           | s                 | rec    | G2583_2609 | yegQ      | CDS        |
| O157                 | 2841972           | s                 | rec    | G2583_2609 | yegQ      | CDS        |
| O157                 | 2841978           | s                 | rec    | G2583_2609 | yegQ      | CDS        |
| O157                 | 2842017           | s                 | rec    | G2583_2609 | yegQ      | CDS        |
| O157                 | 2842020           | s                 | rec    | G2583_2609 | yegQ      | CDS        |
| O157                 | 2842056           | s                 | rec    | G2583_2609 | yegQ      | CDS        |
| O157                 | 2842059           | s                 | rec    | G2583_2609 | yegQ      | CDS        |
| O157                 | 2842077           | s                 | rec    | G2583_2609 | yegQ      | CDS        |
| O157                 | 2842440           | s                 | rec    | G2583_2609 | yegQ      | CDS        |
| O157                 | 2842452           | s                 | rec    | G2583_2609 | yegQ      | CDS        |
| O157                 | 2842551           | nc                | rec    | G2583_2610 | -         | pseudogene |
| O157                 | 2842656           | i                 | rec    | intergenic |           |            |
| O157                 | 2842658           | ns                | rec    | G2583_2611 | -         | CDS        |
| O157                 | 2842681           | s                 | rec    | G2583_2611 | -         | CDS        |
| O157                 | 2842716           | ns                | rec    | G2583_2611 | -         | CDS        |
| O157                 | 2842735           | ns                | rec    | G2583_2611 | -         | CDS        |
| O157                 | 2842749           | ns                | rec    | G2583_2611 | -         | CDS        |
| O157                 | 2842755           | s                 | rec    | G2583_2611 | -         | CDS        |
| O157                 | 2842770           | ns                | rec    | G2583_2611 | -         | CDS        |
| O157                 | 2843019           | s                 | rec    | G2583_2612 | yegR      | CDS        |
| O157                 | 2843030           | ns                | rec    | G2583_2612 | yegR      | CDS        |
| O157                 | 2843106           | ns                | rec    | G2583_2612 | yegR      | CDS        |
| O157                 | 2843111           | ns                | rec    | G2583_2612 | yegR      | CDS        |
| O157                 | 2843212           | i                 | rec    | intergenic |           |            |
| O157                 | 2843272           | i                 | rec    | intergenic |           |            |
| O157                 | 2843297           | i                 | rec    | intergenic |           |            |
| O157                 | 2843308           | i                 | rec    | intergenic |           |            |
| O157                 | 2843322           | i                 | rec    | intergenic |           |            |
| O157                 | 2843354           | i                 | rec    | intergenic |           |            |
| O157                 | 2843361           | i                 | rec    | intergenic |           |            |
| O157                 | 2843372           | i                 | rec    | intergenic |           |            |
| O157                 | 2843408           | i                 | rec    | intergenic |           |            |
| O157                 | 2843426           | i                 | rec    | intergenic |           |            |
| O157                 | 2843432           | i                 | rec    | intergenic |           |            |
| O157                 | 2843489           | i                 | rec    | intergenic |           |            |
| O157                 | 2843571           | s                 | rec    | G2583_2613 | yegS      | CDS        |
| O157                 | 2843576           | s                 | rec    | G2583_2613 | yegS      | CDS        |

| lineage <sup>a</sup> | site <sup>b</sup> | mutation          |        | gene       | Gene name | Type |
|----------------------|-------------------|-------------------|--------|------------|-----------|------|
|                      |                   | type <sup>c</sup> | recomb |            |           |      |
| O157                 | 2843766           | ns                | rec    | G2583_2613 | yegS      | CDS  |
| O157                 | 2843852           | s                 | rec    | G2583_2613 | yegS      | CDS  |
| O157                 | 2843942           | s                 | rec    | G2583_2613 | yegS      | CDS  |
| O157                 | 2844405           | s                 | rec    | G2583_2613 | yegS      | CDS  |
| O157                 | 2844407           | s                 | rec    | G2583_2613 | yegS      | CDS  |
| O157                 | 2844543           | s                 | rec    | G2583_2622 | gatR      | CDS  |
| O157                 | 2844549           | ns                | rec    | G2583_2622 | gatR      | CDS  |
| O157                 | 2844558           | s                 | rec    | G2583_2622 | gatR      | CDS  |
| O157                 | 2845035           | s                 | rec    | G2583_2622 | gatR      | CDS  |
| O157                 | 2845089           | s                 | rec    | G2583_2622 | gatR      | CDS  |
| O157                 | 2845122           | s                 | rec    | G2583_2622 | gatR      | CDS  |
| O157                 | 2845445           | ns                | rec    | G2583_2623 | gatD      | CDS  |
| O157                 | 2845638           | s                 | rec    | G2583_2623 | gatD      | CDS  |
| O157                 | 2845647           | s                 | rec    | G2583_2623 | gatD      | CDS  |
| O157                 | 2845689           | s                 | rec    | G2583_2623 | gatD      | CDS  |
| O157                 | 2845740           | s                 | rec    | G2583_2623 | gatD      | CDS  |
| O157                 | 2845754           | ns                | rec    | G2583_2623 | gatD      | CDS  |
| O157                 | 2845848           | s                 | rec    | G2583_2623 | gatD      | CDS  |
| O157                 | 2845986           | s                 | rec    | G2583_2623 | gatD      | CDS  |
| O157                 | 2846043           | s                 | rec    | G2583_2623 | gatD      | CDS  |
| O157                 | 2846132           | s                 | rec    | G2583_2623 | gatD      | CDS  |
| O157                 | 2846190           | s                 | rec    | G2583_2623 | gatD      | CDS  |
| O157                 | 2846428           | i                 | rec    | intergenic |           |      |
| O157                 | 2846481           | ns                | rec    | G2583_2624 | gatC      | CDS  |
| O157                 | 2846537           | s                 | rec    | G2583_2624 | gatC      | CDS  |
| O157                 | 2846710           | ns                | rec    | G2583_2624 | gatC      | CDS  |
| O157                 | 2846798           | s                 | rec    | G2583_2624 | gatC      | CDS  |
| O157                 | 2846834           | s                 | rec    | G2583_2624 | gatC      | CDS  |
| O157                 | 2846846           | s                 | rec    | G2583_2624 | gatC      | CDS  |
| O157                 | 2846849           | s                 | rec    | G2583_2624 | gatC      | CDS  |
| O157                 | 2846879           | s                 | rec    | G2583_2624 | gatC      | CDS  |
| O157                 | 2847044           | s                 | rec    | G2583_2624 | gatC      | CDS  |
| O157                 | 2847053           | s                 | rec    | G2583_2624 | gatC      | CDS  |
| O157                 | 2847056           | s                 | rec    | G2583_2624 | gatC      | CDS  |
| O157                 | 2847102           | ns                | rec    | G2583_2624 | gatC      | CDS  |
| O157                 | 2847209           | s                 | rec    | G2583_2624 | gatC      | CDS  |
| O157                 | 2847230           | s                 | rec    | G2583_2624 | gatC      | CDS  |
| O157                 | 2847233           | s                 | rec    | G2583_2624 | gatC      | CDS  |
| O157                 | 2847293           | s                 | rec    | G2583_2624 | gatC      | CDS  |
| O157                 | 2847377           | s                 | rec    | G2583_2624 | gatC      | CDS  |
| O157                 | 2847655           | s                 | rec    | G2583_2624 | gatC      | CDS  |
| O157                 | 2847926           | s                 | rec    | G2583_2625 | gatB      | CDS  |
| O157                 | 2847929           | s                 | rec    | G2583_2625 | gatB      | CDS  |
| O157                 | 2847932           | ns                | rec    | G2583_2625 | gatB      | CDS  |
| O157                 | 2847933           | ns                | rec    | G2583_2625 | gatB      | CDS  |

| lineage <sup>a</sup> | site <sup>b</sup> | mutation          |        | gene       | Gene name | Type |
|----------------------|-------------------|-------------------|--------|------------|-----------|------|
|                      |                   | type <sup>c</sup> | recomb |            |           |      |
| O157                 | 2847938           | s                 | rec    | G2583_2625 | gatB      | CDS  |
| O157                 | 2847941           | s                 | rec    | G2583_2625 | gatB      | CDS  |
| O157                 | 2847944           | s                 | rec    | G2583_2625 | gatB      | CDS  |
| O157                 | 2847959           | s                 | rec    | G2583_2625 | gatB      | CDS  |
| O157                 | 2848294           | ns                | rec    | G2583_2626 | gatA      | CDS  |
| O157                 | 2848359           | ns                | rec    | G2583_2626 | gatA      | CDS  |
| O157                 | 2848883           | s                 | rec    | G2583_2627 | gatZ      | CDS  |
| O157                 | 2848892           | s                 | rec    | G2583_2627 | gatZ      | CDS  |
| O157                 | 2848997           | s                 | rec    | G2583_2627 | gatZ      | CDS  |
| O157                 | 2849117           | s                 | rec    | G2583_2627 | gatZ      | CDS  |
| O157                 | 2849228           | s                 | rec    | G2583_2627 | gatZ      | CDS  |
| O157                 | 2849568           | ns                | rec    | G2583_2627 | gatZ      | CDS  |
| O157                 | 2849603           | s                 | rec    | G2583_2627 | gatZ      | CDS  |
| O157                 | 2849606           | s                 | rec    | G2583_2627 | gatZ      | CDS  |
| O157                 | 2849621           | s                 | rec    | G2583_2627 | gatZ      | CDS  |
| O157                 | 2849624           | s                 | rec    | G2583_2627 | gatZ      | CDS  |
| O157                 | 2849636           | s                 | rec    | G2583_2627 | gatZ      | CDS  |
| O157                 | 2849639           | s                 | rec    | G2583_2627 | gatZ      | CDS  |
| O157                 | 2849656           | ns                | rec    | G2583_2627 | gatZ      | CDS  |
| O157                 | 2850513           | s                 | rec    | G2583_2628 | gatY      | CDS  |
| O157                 | 2850531           | ns                | rec    | G2583_2628 | gatY      | CDS  |
| O157                 | 2850560           | ns                | rec    | G2583_2628 | gatY      | CDS  |
| O157                 | 2850693           | s                 | rec    | G2583_2628 | gatY      | CDS  |
| O157                 | 2850708           | s                 | rec    | G2583_2628 | gatY      | CDS  |
| O157                 | 2850752           | i                 | rec    | intergenic |           |      |
| O157                 | 2850762           | i                 | rec    | intergenic |           |      |
| O157                 | 2850781           | i                 | rec    | intergenic |           |      |
| O157                 | 2850792           | i                 | rec    | intergenic |           |      |
| O157                 | 2850845           | i                 | rec    | intergenic |           |      |
| O157                 | 2850846           | i                 | rec    | intergenic |           |      |
| O157                 | 2850848           | i                 | rec    | intergenic |           |      |
| O157                 | 2850854           | i                 | rec    | intergenic |           |      |
| O157                 | 2850882           | ins               | rec    | intergenic |           |      |
| EDL933               | 2850892           | i                 |        | intergenic |           |      |
| O157                 | 2850892           | i                 | rec    | intergenic |           |      |
| Sakai                | 2850892           | i                 |        | intergenic |           |      |
| O157                 | 2850895           | i                 | rec    | intergenic |           |      |
| O157                 | 2850896           | i                 | rec    | intergenic |           |      |
| O157                 | 2850908           | i                 | rec    | intergenic |           |      |
| O157                 | 2850916           | i                 | rec    | intergenic |           |      |
| O157                 | 2850917           | i                 | rec    | intergenic |           |      |
| O157                 | 2850927           | i                 | rec    | intergenic |           |      |
| O157                 | 2850936           | i                 | rec    | intergenic |           |      |
| O157                 | 2850949           | i                 | rec    | intergenic |           |      |
| O157                 | 2850968           | i                 | rec    | intergenic |           |      |

| lineage <sup>a</sup> | site <sup>b</sup> | mutation          |        | gene       | Gene name | Type |
|----------------------|-------------------|-------------------|--------|------------|-----------|------|
|                      |                   | type <sup>c</sup> | recomb |            |           |      |
| O157                 | 2851003           | i                 | rec    | intergenic |           |      |
| O157                 | 2851012           | i                 | rec    | intergenic |           |      |
| O157                 | 2851037           | i                 | rec    | intergenic |           |      |
| O157                 | 2851040           | del-9             | rec    | intergenic |           |      |
| O157                 | 2851630           | s                 | rec    | G2583_2629 | fbaB      | CDS  |
| O157                 | 2851705           | s                 | rec    | G2583_2629 | fbaB      | CDS  |
| O157                 | 2851711           | s                 | rec    | G2583_2629 | fbaB      | CDS  |
| O157                 | 2851729           | s                 | rec    | G2583_2629 | fbaB      | CDS  |
| O157                 | 2851732           | s                 | rec    | G2583_2629 | fbaB      | CDS  |
| O157                 | 2851752           | s                 | rec    | G2583_2629 | fbaB      | CDS  |
| O157                 | 2851768           | s                 | rec    | G2583_2629 | fbaB      | CDS  |
| O157                 | 2852008           | s                 | rec    | G2583_2629 | fbaB      | CDS  |
| O157                 | 2852189           | i                 | rec    | intergenic |           |      |
| O157                 | 2852190           | i                 | rec    | intergenic |           |      |
| EDL933               | 2922483           | ins               |        | intergenic |           |      |
| O157                 | 2852311           | i                 | rec    | intergenic |           |      |
| O157                 | 2852366           | ns                | rec    | G2583_2630 | yegT      | CDS  |
| O157                 | 2852432           | s                 | rec    | G2583_2630 | yegT      | CDS  |
| O157                 | 2852539           | s                 | rec    | G2583_2630 | yegT      | CDS  |
| O157                 | 2852582           | ns                | rec    | G2583_2630 | yegT      | CDS  |
| O157                 | 2852592           | ns                | rec    | G2583_2630 | yegT      | CDS  |
| O157                 | 2852608           | s                 | rec    | G2583_2630 | yegT      | CDS  |
| O157                 | 2852722           | s                 | rec    | G2583_2630 | yegT      | CDS  |
| O157                 | 2852776           | s                 | rec    | G2583_2630 | yegT      | CDS  |
| O157                 | 2852908           | s                 | rec    | G2583_2630 | yegT      | CDS  |
| O157                 | 2853121           | s                 | rec    | G2583_2630 | yegT      | CDS  |
| O157                 | 2853151           | s                 | rec    | G2583_2630 | yegT      | CDS  |
| O157                 | 2853191           | ns                | rec    | G2583_2630 | yegT      | CDS  |
| O157                 | 2853271           | s                 | rec    | G2583_2630 | yegT      | CDS  |
| O157                 | 2853280           | s                 | rec    | G2583_2630 | yegT      | CDS  |
| O157                 | 2853361           | s                 | rec    | G2583_2630 | yegT      | CDS  |
| O157                 | 2853370           | s                 | rec    | G2583_2630 | yegT      | CDS  |
| O157                 | 2853547           | s                 | rec    | G2583_2630 | yegT      | CDS  |
| O157                 | 2853771           | s                 | rec    | G2583_2631 | yegU      | CDS  |
| O157                 | 2853960           | s                 | rec    | G2583_2631 | yegU      | CDS  |
| O157                 | 2853963           | s                 | rec    | G2583_2631 | yegU      | CDS  |
| O157                 | 2854067           | ns                | rec    | G2583_2631 | yegU      | CDS  |
| O157                 | 2854068           | ns                | rec    | G2583_2631 | yegU      | CDS  |
| O157                 | 2854087           | ns                | rec    | G2583_2631 | yegU      | CDS  |
| O157                 | 2854107           | s                 | rec    | G2583_2631 | yegU      | CDS  |
| O157                 | 2854140           | s                 | rec    | G2583_2631 | yegU      | CDS  |
| O157                 | 2854176           | s                 | rec    | G2583_2631 | yegU      | CDS  |
| O157                 | 2854213           | s                 | rec    | G2583_2631 | yegU      | CDS  |
| O157                 | 2854250           | ns                | rec    | G2583_2631 | yegU      | CDS  |
| O157                 | 2854254           | s                 | rec    | G2583_2631 | yegU      | CDS  |

| lineage <sup>a</sup> | site <sup>b</sup> | mutation          |        | gene       | Gene name | Type |
|----------------------|-------------------|-------------------|--------|------------|-----------|------|
|                      |                   | type <sup>c</sup> | recomb |            |           |      |
| O157                 | 2854257           | s                 | rec    | G2583_2631 | yegU      | CDS  |
| O157                 | 2854278           | s                 | rec    | G2583_2631 | yegU      | CDS  |
| O157                 | 2854281           | s                 | rec    | G2583_2631 | yegU      | CDS  |
| O157                 | 2854431           | s                 | rec    | G2583_2631 | yegU      | CDS  |
| O157                 | 2854434           | s                 | rec    | G2583_2631 | yegU      | CDS  |
| O157                 | 2854467           | s                 | rec    | G2583_2631 | yegU      | CDS  |
| O157                 | 2854482           | s                 | rec    | G2583_2631 | yegU      | CDS  |
| O157                 | 2854497           | s                 | rec    | G2583_2631 | yegU      | CDS  |
| O157                 | 2854500           | s                 | rec    | G2583_2631 | yegU      | CDS  |
| O157                 | 2854519           | ns                | rec    | G2583_2631 | yegU      | CDS  |
| O157                 | 2854551           | s                 | rec    | G2583_2631 | yegU      | CDS  |
| O157                 | 2854552           | s                 | rec    | G2583_2631 | yegU      | CDS  |
| O157                 | 2854605           | s                 | rec    | G2583_2631 | yegU      | CDS  |
| O157                 | 2854611           | s                 | rec    | G2583_2631 | yegU      | CDS  |
| O157                 | 2854625           | ns                | rec    | G2583_2631 | yegU      | CDS  |
| O157                 | 2854628           | ns                | rec    | G2583_2631 | yegU      | CDS  |
| O157                 | 2854685           | s                 | rec    | G2583_2632 | yegV      | CDS  |
| O157                 | 2854691           | s                 | rec    | G2583_2632 | yegV      | CDS  |
| O157                 | 2854692           | ns                | rec    | G2583_2632 | yegV      | CDS  |
| O157                 | 2854694           | ns                | rec    | G2583_2632 | yegV      | CDS  |
| O157                 | 2854703           | s                 | rec    | G2583_2632 | yegV      | CDS  |
| O157                 | 2854712           | s                 | rec    | G2583_2632 | yegV      | CDS  |
| O157                 | 2854844           | s                 | rec    | G2583_2632 | yegV      | CDS  |
| O157                 | 2854865           | s                 | rec    | G2583_2632 | yegV      | CDS  |
| O157                 | 2854868           | s                 | rec    | G2583_2632 | yegV      | CDS  |
| O157                 | 2854907           | s                 | rec    | G2583_2632 | yegV      | CDS  |
| O157                 | 2854932           | ns                | rec    | G2583_2632 | yegV      | CDS  |
| O157                 | 2854952           | s                 | rec    | G2583_2632 | yegV      | CDS  |
| O157                 | 2855186           | ns                | rec    | G2583_2632 | yegV      | CDS  |
| O157                 | 2855204           | s                 | rec    | G2583_2632 | yegV      | CDS  |
| O157                 | 2855210           | s                 | rec    | G2583_2632 | yegV      | CDS  |
| O157                 | 2855216           | s                 | rec    | G2583_2632 | yegV      | CDS  |
| O157                 | 2855219           | s                 | rec    | G2583_2632 | yegV      | CDS  |
| O157                 | 2855220           | s                 | rec    | G2583_2632 | yegV      | CDS  |
| O157                 | 2855222           | s                 | rec    | G2583_2632 | yegV      | CDS  |
| O157                 | 2855228           | s                 | rec    | G2583_2632 | yegV      | CDS  |
| O157                 | 2855249           | s                 | rec    | G2583_2632 | yegV      | CDS  |
| O157                 | 2855282           | ns                | rec    | G2583_2632 | yegV      | CDS  |
| O157                 | 2855285           | s                 | rec    | G2583_2632 | yegV      | CDS  |
| O157                 | 2855288           | s                 | rec    | G2583_2632 | yegV      | CDS  |
| O157                 | 2855291           | s                 | rec    | G2583_2632 | yegV      | CDS  |
| O157                 | 2855294           | s                 | rec    | G2583_2632 | yegV      | CDS  |
| O157                 | 2855320           | ns                | rec    | G2583_2632 | yegV      | CDS  |
| O157                 | 2855322           | ns                | rec    | G2583_2632 | yegV      | CDS  |
| O157                 | 2855324           | ns                | rec    | G2583_2632 | yegV      | CDS  |



| lineage <sup>a</sup> | site <sup>b</sup> | mutation          |        | gene       | Gene name | Type |
|----------------------|-------------------|-------------------|--------|------------|-----------|------|
|                      |                   | type <sup>c</sup> | recomb |            |           |      |
| O157                 | 2855328           | s                 | rec    | G2583_2632 | yegV      | CDS  |
| O157                 | 2855333           | s                 | rec    | G2583_2632 | yegV      | CDS  |
| O157                 | 2855334           | ns                | rec    | G2583_2632 | yegV      | CDS  |
| O157                 | 2855336           | ns                | rec    | G2583_2632 | yegV      | CDS  |
| O157                 | 2855351           | s                 | rec    | G2583_2632 | yegV      | CDS  |
| O157                 | 2855354           | s                 | rec    | G2583_2632 | yegV      | CDS  |
| O157                 | 2855357           | s                 | rec    | G2583_2632 | yegV      | CDS  |
| O157                 | 2855370           | ns                | rec    | G2583_2632 | yegV      | CDS  |
| O157                 | 2855373           | ns                | rec    | G2583_2632 | yegV      | CDS  |
| O157                 | 2855381           | s                 | rec    | G2583_2632 | yegV      | CDS  |
| O157                 | 2855388           | ns                | rec    | G2583_2632 | yegV      | CDS  |
| O157                 | 2855389           | ns                | rec    | G2583_2632 | yegV      | CDS  |
| O157                 | 2855402           | s                 | rec    | G2583_2632 | yegV      | CDS  |
| O157                 | 2855411           | s                 | rec    | G2583_2632 | yegV      | CDS  |
| O157                 | 2855420           | s                 | rec    | G2583_2632 | yegV      | CDS  |
| O157                 | 2855426           | s                 | rec    | G2583_2632 | yegV      | CDS  |
| O157                 | 2855435           | s                 | rec    | G2583_2632 | yegV      | CDS  |
| O157                 | 2855438           | s                 | rec    | G2583_2632 | yegV      | CDS  |
| O157                 | 2855441           | s                 | rec    | G2583_2632 | yegV      | CDS  |
| O157                 | 2855456           | s                 | rec    | G2583_2632 | yegV      | CDS  |
| O157                 | 2855463           | s                 | rec    | G2583_2632 | yegV      | CDS  |
| O157                 | 2855468           | s                 | rec    | G2583_2632 | yegV      | CDS  |
| O157                 | 2855622           | s                 | rec    | G2583_2633 | yegW      | CDS  |
| O157                 | 2855745           | s                 | rec    | G2583_2633 | yegW      | CDS  |
| O157                 | 2855748           | s                 | rec    | G2583_2633 | yegW      | CDS  |
| O157                 | 2855760           | s                 | rec    | G2583_2633 | yegW      | CDS  |
| O157                 | 2855778           | s                 | rec    | G2583_2633 | yegW      | CDS  |
| O157                 | 2856090           | s                 | rec    | G2583_2633 | yegW      | CDS  |
| O157                 | 2856412           | ns                | rec    | G2583_2634 | yegX      | CDS  |
| O157                 | 2856414           | s                 | rec    | G2583_2634 | yegX      | CDS  |
| O157                 | 2856443           | ns                | rec    | G2583_2634 | yegX      | CDS  |
| O157                 | 2856450           | s                 | rec    | G2583_2634 | yegX      | CDS  |
| O157                 | 2856465           | s                 | rec    | G2583_2634 | yegX      | CDS  |
| O157                 | 2856489           | s                 | rec    | G2583_2634 | yegX      | CDS  |
| O157                 | 2856516           | s                 | rec    | G2583_2634 | yegX      | CDS  |
| O157                 | 2856576           | s                 | rec    | G2583_2634 | yegX      | CDS  |
| O157                 | 2856608           | ns                | rec    | G2583_2634 | yegX      | CDS  |
| O157                 | 2856618           | s                 | rec    | G2583_2634 | yegX      | CDS  |
| O157                 | 2856659           | s                 | rec    | G2583_2634 | yegX      | CDS  |
| O157                 | 2856888           | s                 | rec    | G2583_2634 | yegX      | CDS  |
| O157                 | 2856894           | s                 | rec    | G2583_2634 | yegX      | CDS  |
| O157                 | 2856900           | s                 | rec    | G2583_2634 | yegX      | CDS  |
| O157                 | 2856918           | s                 | rec    | G2583_2634 | yegX      | CDS  |
| O157                 | 2857005           | ns                | rec    | G2583_2634 | yegX      | CDS  |
| O157                 | 2857006           | ns                | rec    | G2583_2634 | yegX      | CDS  |

| lineage <sup>a</sup> | site <sup>b</sup> | mutation          |        | gene       | Gene name | Type |
|----------------------|-------------------|-------------------|--------|------------|-----------|------|
|                      |                   | type <sup>c</sup> | recomb |            |           |      |
| O157                 | 2857057           | ns                | rec    | G2583_2634 | yegX      | CDS  |
| O157                 | 2857101           | s                 | rec    | G2583_2634 | yegX      | CDS  |
| O157                 | 2857105           | ns                | rec    | G2583_2634 | yegX      | CDS  |
| O157                 | 2857145           | s                 | rec    | G2583_2634 | yegX      | CDS  |
| O157                 | 2857154           | ns                | rec    | G2583_2634 | yegX      | CDS  |
| O157                 | 2857170           | s                 | rec    | G2583_2634 | yegX      | CDS  |
| O157                 | 2857176           | s                 | rec    | G2583_2634 | yegX      | CDS  |
| O157                 | 2857215           | i                 | rec    | intergenic |           |      |
| O157                 | 2857516           | s                 | rec    | G2583_2635 | thiD      | CDS  |
| O157                 | 2857543           | s                 | rec    | G2583_2635 | thiD      | CDS  |
| O157                 | 2857560           | ns                | rec    | G2583_2635 | thiD      | CDS  |
| O157                 | 2857618           | s                 | rec    | G2583_2635 | thiD      | CDS  |
| O157                 | 2857675           | s                 | rec    | G2583_2635 | thiD      | CDS  |
| O157                 | 2857681           | ns                | rec    | G2583_2635 | thiD      | CDS  |
| O157                 | 2857682           | ns                | rec    | G2583_2635 | thiD      | CDS  |
| O157                 | 2857687           | s                 | rec    | G2583_2635 | thiD      | CDS  |
| O157                 | 2857705           | s                 | rec    | G2583_2635 | thiD      | CDS  |
| O157                 | 2857714           | s                 | rec    | G2583_2635 | thiD      | CDS  |
| O157                 | 2857828           | s                 | rec    | G2583_2635 | thiD      | CDS  |
| O157                 | 2857924           | s                 | rec    | G2583_2635 | thiD      | CDS  |
| O157                 | 2858185           | ns                | rec    | G2583_2636 | thiM      | CDS  |
| O157                 | 2858205           | s                 | rec    | G2583_2636 | thiM      | CDS  |
| O157                 | 2858288           | ns                | rec    | G2583_2636 | thiM      | CDS  |
| O157                 | 2858293           | ns                | rec    | G2583_2636 | thiM      | CDS  |
| O157                 | 2858295           | s                 | rec    | G2583_2636 | thiM      | CDS  |
| O157                 | 2858315           | ns                | rec    | G2583_2636 | thiM      | CDS  |
| O157                 | 2858379           | s                 | rec    | G2583_2636 | thiM      | CDS  |
| O157                 | 2858383           | ns                | rec    | G2583_2636 | thiM      | CDS  |
| O157                 | 2858388           | s                 | rec    | G2583_2636 | thiM      | CDS  |
| O157                 | 2858415           | s                 | rec    | G2583_2636 | thiM      | CDS  |
| O157                 | 2858419           | ns                | rec    | G2583_2636 | thiM      | CDS  |
| O157                 | 2858508           | s                 | rec    | G2583_2636 | thiM      | CDS  |
| O157                 | 2858553           | s                 | rec    | G2583_2636 | thiM      | CDS  |
| O157                 | 2858583           | s                 | rec    | G2583_2636 | thiM      | CDS  |
| O157                 | 2858616           | s                 | rec    | G2583_2636 | thiM      | CDS  |
| O157                 | 2858705           | ns                | rec    | G2583_2636 | thiM      | CDS  |
| O157                 | 2858757           | s                 | rec    | G2583_2636 | thiM      | CDS  |
| O157                 | 2858795           | ns                | rec    | G2583_2636 | thiM      | CDS  |
| O157                 | 2858941           | i                 | rec    | intergenic |           |      |
| O157                 | 2858990           | i                 | rec    | intergenic |           |      |
| O157                 | 2859001           | i                 | rec    | intergenic |           |      |
| O157                 | 2859003           | i                 | rec    | intergenic |           |      |
| O157                 | 2859023           | i                 | rec    | intergenic |           |      |
| O157                 | 2859688           | i                 | rec    | intergenic |           |      |
| O157                 | 2859789           | i                 | rec    | intergenic |           |      |

| lineage <sup>a</sup> | site <sup>b</sup> | mutation          |        | gene       | Gene name | Type |
|----------------------|-------------------|-------------------|--------|------------|-----------|------|
|                      |                   | type <sup>c</sup> | recomb |            |           |      |
| O157                 | 2860132           | del               | rec    | intergenic |           |      |
| O157                 | 2860167           | i                 | rec    | intergenic |           |      |
| O157                 | 2860331           | i                 | rec    | intergenic |           |      |
| O157                 | 2860435           | i                 | rec    | intergenic |           |      |
| O157                 | 2860451           | i                 | rec    | intergenic |           |      |
| O157                 | 2861051           | s                 | rec    | G2583_2640 | -         | CDS  |
| O157                 | 2861203           | i                 | rec    | intergenic |           |      |
| O157                 | 2861292           | ns                | rec    | G2583_2641 | rcnR      | CDS  |
| O157                 | 2861320           | s                 | rec    | G2583_2641 | rcnR      | CDS  |
| O157                 | 2861329           | s                 | rec    | G2583_2641 | rcnR      | CDS  |
| O157                 | 2861419           | s                 | rec    | G2583_2641 | rcnR      | CDS  |
| O157                 | 2861473           | s                 | rec    | G2583_2641 | rcnR      | CDS  |
| O157                 | 2861570           | i                 | rec    | intergenic |           |      |
| O157                 | 2861994           | s                 | rec    | G2583_2642 | rcnA      | CDS  |
| O157                 | 2862001           | ins-9             | rec    | G2583_2642 | rcnA      | CDS  |
| O157                 | 2862015           | s                 | rec    | G2583_2642 | rcnA      | CDS  |
| O157                 | 2862018           | s                 | rec    | G2583_2642 | rcnA      | CDS  |
| O157                 | 2862027           | ins               | rec    | G2583_2642 | rcnA      | CDS  |
| EDL933               | 2932247           | ins-8             |        | G2583_2642 | rcnA      | CDS  |
| Sakai                | 2862027           | del-4             |        | G2583_2642 | rcnA      | CDS  |
| O157                 | 2862030           | s                 | rec    | G2583_2642 | rcnA      | CDS  |
| O157                 | 2862036           | ns                | rec    | G2583_2642 | rcnA      | CDS  |
| O157                 | 2862037           | ns                | rec    | G2583_2642 | rcnA      | CDS  |
| O157                 | 2862039           | ns                | rec    | G2583_2642 | rcnA      | CDS  |
| O157                 | 2862040           | ns                | rec    | G2583_2642 | rcnA      | CDS  |
| O157                 | 2862051           | s                 | rec    | G2583_2642 | rcnA      | CDS  |
| O157                 | 2862053           | ns                | rec    | G2583_2642 | rcnA      | CDS  |
| O157                 | 2862069           | s                 | rec    | G2583_2642 | rcnA      | CDS  |
| O157                 | 2862079           | ins-9             | rec    | G2583_2642 | rcnA      | CDS  |
| O157                 | 2862175           | s                 | rec    | G2583_2642 | rcnA      | CDS  |
| O157                 | 2862189           | s                 | rec    | G2583_2642 | rcnA      | CDS  |
| O157                 | 2862201           | s                 | rec    | G2583_2642 | rcnA      | CDS  |
| O157                 | 2862291           | s                 | rec    | G2583_2642 | rcnA      | CDS  |
| O157                 | 2862294           | s                 | rec    | G2583_2642 | rcnA      | CDS  |
| O157                 | 2862300           | s                 | rec    | G2583_2642 | rcnA      | CDS  |
| O157                 | 2862301           | s                 | rec    | G2583_2642 | rcnA      | CDS  |
| O157                 | 2862312           | s                 | rec    | G2583_2642 | rcnA      | CDS  |
| O157                 | 2862315           | s                 | rec    | G2583_2642 | rcnA      | CDS  |
| O157                 | 2862327           | s                 | rec    | G2583_2642 | rcnA      | CDS  |
| O157                 | 2862330           | s                 | rec    | G2583_2642 | rcnA      | CDS  |
| O157                 | 2862339           | s                 | rec    | G2583_2642 | rcnA      | CDS  |
| O157                 | 2862345           | s                 | rec    | G2583_2642 | rcnA      | CDS  |
| O157                 | 2862348           | s                 | rec    | G2583_2642 | rcnA      | CDS  |
| O157                 | 2862351           | s                 | rec    | G2583_2642 | rcnA      | CDS  |
| O157                 | 2862414           | s                 | rec    | G2583_2642 | rcnA      | CDS  |

| lineage <sup>a</sup> | site <sup>b</sup> | mutation          |        | gene       | Gene name | Type |
|----------------------|-------------------|-------------------|--------|------------|-----------|------|
|                      |                   | type <sup>c</sup> | recomb |            |           |      |
| O157                 | 2862420           | s                 | rec    | G2583_2642 | rcnA      | CDS  |
| O157                 | 2862429           | s                 | rec    | G2583_2642 | rcnA      | CDS  |
| O157                 | 2862441           | s                 | rec    | G2583_2642 | rcnA      | CDS  |
| O157                 | 2862444           | s                 | rec    | G2583_2642 | rcnA      | CDS  |
| O157                 | 2862453           | s                 | rec    | G2583_2642 | rcnA      | CDS  |
| O157                 | 2862459           | s                 | rec    | G2583_2642 | rcnA      | CDS  |
| O157                 | 2862462           | s                 | rec    | G2583_2642 | rcnA      | CDS  |
| O157                 | 2862466           | s                 | rec    | G2583_2642 | rcnA      | CDS  |
| O157                 | 2862472           | i                 | rec    | intergenic |           |      |
| O157                 | 2862473           | i                 | rec    | intergenic |           |      |
| O157                 | 2862479           | i                 | rec    | intergenic |           |      |
| O157                 | 2862480           | i                 | rec    | intergenic |           |      |
| O157                 | 2862481           | i                 | rec    | intergenic |           |      |
| O157                 | 2862483           | i                 | rec    | intergenic |           |      |
| O157                 | 2862488           | del-3             | rec    | intergenic |           |      |
| O157                 | 2862489           | i                 | rec    | intergenic |           |      |
| O157                 | 2862491           | i                 | rec    | intergenic |           |      |
| O157                 | 2862496           | ins-2             | rec    | intergenic |           |      |
| O157                 | 2862500           | i                 | rec    | intergenic |           |      |
| O157                 | 2862527           | ns                | rec    | G2583_2643 | yohN      | CDS  |
| O157                 | 2862528           | ns                | rec    | G2583_2643 | yohN      | CDS  |
| O157                 | 2862536           | ns                | rec    | G2583_2643 | yohN      | CDS  |
| O157                 | 2862540           | ns                | rec    | G2583_2643 | yohN      | CDS  |
| O157                 | 2862541           | ns                | rec    | G2583_2643 | yohN      | CDS  |
| O157                 | 2862542           | ns                | rec    | G2583_2643 | yohN      | CDS  |
| O157                 | 2862543           | ns                | rec    | G2583_2643 | yohN      | CDS  |
| O157                 | 2862548           | ns                | rec    | G2583_2643 | yohN      | CDS  |
| O157                 | 2862551           | ns                | rec    | G2583_2643 | yohN      | CDS  |
| O157                 | 2862563           | ns                | rec    | G2583_2643 | yohN      | CDS  |
| O157                 | 2862564           | ns                | rec    | G2583_2643 | yohN      | CDS  |
| O157                 | 2862565           | ns                | rec    | G2583_2643 | yohN      | CDS  |
| O157                 | 2862566           | ns                | rec    | G2583_2643 | yohN      | CDS  |
| O157                 | 2862643           | ns                | rec    | G2583_2643 | yohN      | CDS  |
| O157                 | 2862808           | s                 | rec    | G2583_2643 | yohN      | CDS  |
| O157                 | 2862834           | ns                | rec    | G2583_2643 | yohN      | CDS  |
| O157                 | 2862844           | s                 | rec    | G2583_2643 | yohN      | CDS  |
| O157                 | 2862847           | s                 | rec    | G2583_2643 | yohN      | CDS  |
| O157                 | 2862853           | s                 | rec    | G2583_2643 | yohN      | CDS  |
| O157                 | 2862868           | s                 | rec    | G2583_2643 | yohN      | CDS  |
| O157                 | 2862901           | s                 | rec    | G2583_2643 | yohN      | CDS  |
| O157                 | 2862916           | s                 | rec    | G2583_2643 | yohN      | CDS  |
| O157                 | 2862919           | s                 | rec    | G2583_2643 | yohN      | CDS  |
| O157                 | 2862922           | s                 | rec    | G2583_2643 | yohN      | CDS  |
| O157                 | 2862928           | s                 | rec    | G2583_2643 | yohN      | CDS  |
| O157                 | 2862931           | s                 | rec    | G2583_2643 | yohN      | CDS  |

| lineage <sup>a</sup> | site <sup>b</sup> | mutation          |        | gene       | Gene name | Type       |
|----------------------|-------------------|-------------------|--------|------------|-----------|------------|
|                      |                   | type <sup>c</sup> | recomb |            |           |            |
| O157                 | 2863041           | i                 | rec    | intergenic |           |            |
| O157                 | 2863042           | i                 | rec    | intergenic |           |            |
| O157                 | 2863043           | i                 | rec    | intergenic |           |            |
| O157                 | 2863044           | i                 | rec    | intergenic |           |            |
| O157                 | 2863045           | i                 | rec    | intergenic |           |            |
| O157                 | 2863053           | i                 | rec    | intergenic |           |            |
| O157                 | 2863068           | i                 | rec    | intergenic |           |            |
| O157                 | 2863075           | i                 | rec    | intergenic |           |            |
| O157                 | 2863096           | i                 | rec    | intergenic |           |            |
| O157                 | 2863112           | s                 | rec    | G2583_2644 | yehA      | CDS        |
| O157                 | 2863132           | s                 | rec    | G2583_2644 | yehA      | CDS        |
| O157                 | 2863142           | s                 | rec    | G2583_2644 | yehA      | CDS        |
| O157                 | 2863166           | ns                | rec    | G2583_2644 | yehA      | CDS        |
| O157                 | 2863170           | ns                | rec    | G2583_2644 | yehA      | CDS        |
| O157                 | 2863171           | ns                | rec    | G2583_2644 | yehA      | CDS        |
| O157                 | 2863175           | s                 | rec    | G2583_2644 | yehA      | CDS        |
| O157                 | 2863178           | s                 | rec    | G2583_2644 | yehA      | CDS        |
| O157                 | 2863181           | s                 | rec    | G2583_2644 | yehA      | CDS        |
| O157                 | 2864173           | nc                | rec    | G2583_2645 | yehB      | pseudogene |
| O157                 | 2864217           | nc                | rec    | G2583_2645 | yehB      | pseudogene |
| O157                 | 2864231           | nc                | rec    | G2583_2645 | yehB      | pseudogene |
| O157                 | 2864249           | nc                | rec    | G2583_2645 | yehB      | pseudogene |
| O157                 | 2864258           | nc                | rec    | G2583_2645 | yehB      | pseudogene |
| O157                 | 2864279           | nc                | rec    | G2583_2645 | yehB      | pseudogene |
| O157                 | 2864286           | nc                | rec    | G2583_2645 | yehB      | pseudogene |
| O157                 | 2864301           | nc                | rec    | G2583_2645 | yehB      | pseudogene |
| O157                 | 2864307           | nc                | rec    | G2583_2645 | yehB      | pseudogene |
| O157                 | 2864316           | nc                | rec    | G2583_2645 | yehB      | pseudogene |
| O157                 | 2864319           | nc                | rec    | G2583_2645 | yehB      | pseudogene |
| O157                 | 2864352           | nc                | rec    | G2583_2645 | yehB      | pseudogene |
| O157                 | 2864355           | nc                | rec    | G2583_2645 | yehB      | pseudogene |
| O157                 | 2864361           | nc                | rec    | G2583_2645 | yehB      | pseudogene |
| O157                 | 2864363           | nc                | rec    | G2583_2645 | yehB      | pseudogene |
| O157                 | 2864370           | nc                | rec    | G2583_2645 | yehB      | pseudogene |
| O157                 | 2864391           | nc                | rec    | G2583_2645 | yehB      | pseudogene |
| O157                 | 2864411           | nc                | rec    | G2583_2645 | yehB      | pseudogene |
| O157                 | 2864418           | nc                | rec    | G2583_2645 | yehB      | pseudogene |
| O157                 | 2864421           | nc                | rec    | G2583_2645 | yehB      | pseudogene |
| O157                 | 2864439           | nc                | rec    | G2583_2645 | yehB      | pseudogene |
| O157                 | 2864444           | nc                | rec    | G2583_2645 | yehB      | pseudogene |
| O157                 | 2864445           | nc                | rec    | G2583_2645 | yehB      | pseudogene |
| O157                 | 2864451           | nc                | rec    | G2583_2645 | yehB      | pseudogene |
| O157                 | 2864457           | nc                | rec    | G2583_2645 | yehB      | pseudogene |
| O157                 | 2864463           | nc                | rec    | G2583_2645 | yehB      | pseudogene |
| O157                 | 2864471           | nc                | rec    | G2583_2645 | yehB      | pseudogene |

| lineage <sup>a</sup> | site <sup>b</sup> | mutation          |        | gene       | Gene name | Type       |
|----------------------|-------------------|-------------------|--------|------------|-----------|------------|
|                      |                   | type <sup>c</sup> | recomb |            |           |            |
| O157                 | 2864498           | nc                | rec    | G2583_2645 | yehB      | pseudogene |
| O157                 | 2864528           | nc                | rec    | G2583_2645 | yehB      | pseudogene |
| O157                 | 2864538           | nc                | rec    | G2583_2645 | yehB      | pseudogene |
| O157                 | 2864547           | nc                | rec    | G2583_2645 | yehB      | pseudogene |
| O157                 | 2864555           | nc                | rec    | G2583_2645 | yehB      | pseudogene |
| O157                 | 2864565           | nc                | rec    | G2583_2645 | yehB      | pseudogene |
| O157                 | 2864598           | nc                | rec    | G2583_2645 | yehB      | pseudogene |
| O157                 | 2864604           | nc                | rec    | G2583_2645 | yehB      | pseudogene |
| O157                 | 2864612           | nc                | rec    | G2583_2645 | yehB      | pseudogene |
| O157                 | 2864661           | nc                | rec    | G2583_2645 | yehB      | pseudogene |
| O157                 | 2864670           | nc                | rec    | G2583_2645 | yehB      | pseudogene |
| O157                 | 2864673           | nc                | rec    | G2583_2645 | yehB      | pseudogene |
| O157                 | 2864675           | nc                | rec    | G2583_2645 | yehB      | pseudogene |
| O157                 | 2864676           | nc                | rec    | G2583_2645 | yehB      | pseudogene |
| O157                 | 2864697           | nc                | rec    | G2583_2645 | yehB      | pseudogene |
| O157                 | 2864698           | nc                | rec    | G2583_2645 | yehB      | pseudogene |
| O157                 | 2864727           | nc                | rec    | G2583_2645 | yehB      | pseudogene |
| O157                 | 2864742           | nc                | rec    | G2583_2645 | yehB      | pseudogene |
| O157                 | 2864745           | nc                | rec    | G2583_2645 | yehB      | pseudogene |
| O157                 | 2864746           | nc                | rec    | G2583_2645 | yehB      | pseudogene |
| O157                 | 2864751           | nc                | rec    | G2583_2645 | yehB      | pseudogene |
| O157                 | 2864755           | nc                | rec    | G2583_2645 | yehB      | pseudogene |
| O157                 | 2864763           | nc                | rec    | G2583_2645 | yehB      | pseudogene |
| O157                 | 2864769           | nc                | rec    | G2583_2645 | yehB      | pseudogene |
| O157                 | 2864772           | nc                | rec    | G2583_2645 | yehB      | pseudogene |
| O157                 | 2864805           | nc                | rec    | G2583_2645 | yehB      | pseudogene |
| O157                 | 2864808           | nc                | rec    | G2583_2645 | yehB      | pseudogene |
| O157                 | 2864810           | nc                | rec    | G2583_2645 | yehB      | pseudogene |
| O157                 | 2864816           | nc                | rec    | G2583_2645 | yehB      | pseudogene |
| O157                 | 2864823           | nc                | rec    | G2583_2645 | yehB      | pseudogene |
| O157                 | 2864826           | nc                | rec    | G2583_2645 | yehB      | pseudogene |
| O157                 | 2864835           | nc                | rec    | G2583_2645 | yehB      | pseudogene |
| O157                 | 2864838           | nc                | rec    | G2583_2645 | yehB      | pseudogene |
| O157                 | 2864839           | nc                | rec    | G2583_2645 | yehB      | pseudogene |
| O157                 | 2864844           | nc                | rec    | G2583_2645 | yehB      | pseudogene |
| O157                 | 2864847           | nc                | rec    | G2583_2645 | yehB      | pseudogene |
| O157                 | 2864853           | nc                | rec    | G2583_2645 | yehB      | pseudogene |
| O157                 | 2864862           | nc                | rec    | G2583_2645 | yehB      | pseudogene |
| O157                 | 2864868           | nc                | rec    | G2583_2645 | yehB      | pseudogene |
| O157                 | 2864874           | nc                | rec    | G2583_2645 | yehB      | pseudogene |
| O157                 | 2864880           | nc                | rec    | G2583_2645 | yehB      | pseudogene |
| O157                 | 2864895           | nc                | rec    | G2583_2645 | yehB      | pseudogene |
| O157                 | 2864925           | nc                | rec    | G2583_2645 | yehB      | pseudogene |
| O157                 | 2864928           | nc                | rec    | G2583_2645 | yehB      | pseudogene |
| O157                 | 2864936           | nc                | rec    | G2583_2645 | yehB      | pseudogene |

| lineage <sup>a</sup> | site <sup>b</sup> | mutation          |        | gene       | Gene name | Type       |
|----------------------|-------------------|-------------------|--------|------------|-----------|------------|
|                      |                   | type <sup>c</sup> | recomb |            |           |            |
| O157                 | 2864946           | nc                | rec    | G2583_2645 | yehB      | pseudogene |
| O157                 | 2864952           | nc                | rec    | G2583_2645 | yehB      | pseudogene |
| O157                 | 2864982           | nc                | rec    | G2583_2645 | yehB      | pseudogene |
| O157                 | 2864994           | nc                | rec    | G2583_2645 | yehB      | pseudogene |
| O157                 | 2864995           | nc                | rec    | G2583_2645 | yehB      | pseudogene |
| O157                 | 2864996           | nc                | rec    | G2583_2645 | yehB      | pseudogene |
| O157                 | 2864997           | nc                | rec    | G2583_2645 | yehB      | pseudogene |
| O157                 | 2865000           | nc                | rec    | G2583_2645 | yehB      | pseudogene |
| O157                 | 2865012           | nc                | rec    | G2583_2645 | yehB      | pseudogene |
| O157                 | 2865045           | nc                | rec    | G2583_2645 | yehB      | pseudogene |
| O157                 | 2865049           | nc                | rec    | G2583_2645 | yehB      | pseudogene |
| O157                 | 2865050           | nc                | rec    | G2583_2645 | yehB      | pseudogene |
| O157                 | 2865054           | nc                | rec    | G2583_2645 | yehB      | pseudogene |
| O157                 | 2865068           | nc                | rec    | G2583_2645 | yehB      | pseudogene |
| O157                 | 2865069           | nc                | rec    | G2583_2645 | yehB      | pseudogene |
| O157                 | 2865078           | nc                | rec    | G2583_2645 | yehB      | pseudogene |
| O157                 | 2865093           | nc                | rec    | G2583_2645 | yehB      | pseudogene |
| O157                 | 2865108           | nc                | rec    | G2583_2645 | yehB      | pseudogene |
| O157                 | 2865117           | nc                | rec    | G2583_2645 | yehB      | pseudogene |
| O157                 | 2865135           | nc                | rec    | G2583_2645 | yehB      | pseudogene |
| O157                 | 2865141           | nc                | rec    | G2583_2645 | yehB      | pseudogene |
| O157                 | 2865159           | nc                | rec    | G2583_2645 | yehB      | pseudogene |
| O157                 | 2865168           | nc                | rec    | G2583_2645 | yehB      | pseudogene |
| O157                 | 2865219           | nc                | rec    | G2583_2645 | yehB      | pseudogene |
| O157                 | 2865236           | nc                | rec    | G2583_2645 | yehB      | pseudogene |
| O157                 | 2865243           | nc                | rec    | G2583_2645 | yehB      | pseudogene |
| O157                 | 2865261           | nc                | rec    | G2583_2645 | yehB      | pseudogene |
| O157                 | 2865264           | nc                | rec    | G2583_2645 | yehB      | pseudogene |
| O157                 | 2865270           | nc                | rec    | G2583_2645 | yehB      | pseudogene |
| O157                 | 2865273           | nc                | rec    | G2583_2645 | yehB      | pseudogene |
| O157                 | 2865275           | nc                | rec    | G2583_2645 | yehB      | pseudogene |
| O157                 | 2865279           | nc                | rec    | G2583_2645 | yehB      | pseudogene |
| O157                 | 2865288           | nc                | rec    | G2583_2645 | yehB      | pseudogene |
| O157                 | 2865291           | nc                | rec    | G2583_2645 | yehB      | pseudogene |
| O157                 | 2865313           | nc                | rec    | G2583_2645 | yehB      | pseudogene |
| O157                 | 2865333           | nc                | rec    | G2583_2645 | yehB      | pseudogene |
| O157                 | 2865336           | nc                | rec    | G2583_2645 | yehB      | pseudogene |
| O157                 | 2865339           | nc                | rec    | G2583_2645 | yehB      | pseudogene |
| O157                 | 2865350           | nc                | rec    | G2583_2645 | yehB      | pseudogene |
| O157                 | 2865360           | nc                | rec    | G2583_2645 | yehB      | pseudogene |
| O157                 | 2865381           | nc                | rec    | G2583_2645 | yehB      | pseudogene |
| O157                 | 2865390           | nc                | rec    | G2583_2645 | yehB      | pseudogene |
| O157                 | 2865396           | nc                | rec    | G2583_2645 | yehB      | pseudogene |
| O157                 | 2865399           | nc                | rec    | G2583_2645 | yehB      | pseudogene |
| O157                 | 2865408           | nc                | rec    | G2583_2645 | yehB      | pseudogene |

| lineage <sup>a</sup> | site <sup>b</sup> | mutation          |        | gene       | Gene name | Type       |
|----------------------|-------------------|-------------------|--------|------------|-----------|------------|
|                      |                   | type <sup>c</sup> | recomb |            |           |            |
| O157                 | 2865414           | nc                | rec    | G2583_2645 | yehB      | pseudogene |
| O157                 | 2865420           | nc                | rec    | G2583_2645 | yehB      | pseudogene |
| O157                 | 2865423           | nc                | rec    | G2583_2645 | yehB      | pseudogene |
| O157                 | 2865426           | nc                | rec    | G2583_2645 | yehB      | pseudogene |
| O157                 | 2865435           | nc                | rec    | G2583_2645 | yehB      | pseudogene |
| O157                 | 2865441           | nc                | rec    | G2583_2645 | yehB      | pseudogene |
| O157                 | 2865444           | nc                | rec    | G2583_2645 | yehB      | pseudogene |
| O157                 | 2865450           | nc                | rec    | G2583_2645 | yehB      | pseudogene |
| O157                 | 2865453           | nc                | rec    | G2583_2645 | yehB      | pseudogene |
| O157                 | 2865456           | nc                | rec    | G2583_2645 | yehB      | pseudogene |
| O157                 | 2865462           | nc                | rec    | G2583_2645 | yehB      | pseudogene |
| O157                 | 2865465           | nc                | rec    | G2583_2645 | yehB      | pseudogene |
| O157                 | 2865468           | nc                | rec    | G2583_2645 | yehB      | pseudogene |
| O157                 | 2865471           | nc                | rec    | G2583_2645 | yehB      | pseudogene |
| O157                 | 2865473           | nc                | rec    | G2583_2645 | yehB      | pseudogene |
| O157                 | 2865474           | nc                | rec    | G2583_2645 | yehB      | pseudogene |
| O157                 | 2865477           | nc                | rec    | G2583_2645 | yehB      | pseudogene |
| O157                 | 2865480           | nc                | rec    | G2583_2645 | yehB      | pseudogene |
| O157                 | 2865483           | nc                | rec    | G2583_2645 | yehB      | pseudogene |
| O157                 | 2865486           | nc                | rec    | G2583_2645 | yehB      | pseudogene |
| O157                 | 2865495           | nc                | rec    | G2583_2645 | yehB      | pseudogene |
| O157                 | 2865498           | nc                | rec    | G2583_2645 | yehB      | pseudogene |
| O157                 | 2865506           | nc                | rec    | G2583_2645 | yehB      | pseudogene |
| O157                 | 2865510           | nc                | rec    | G2583_2645 | yehB      | pseudogene |
| O157                 | 2865528           | nc                | rec    | G2583_2645 | yehB      | pseudogene |
| O157                 | 2865573           | nc                | rec    | G2583_2645 | yehB      | pseudogene |
| O157                 | 2865582           | nc                | rec    | G2583_2645 | yehB      | pseudogene |
| O157                 | 2865594           | nc                | rec    | G2583_2645 | yehB      | pseudogene |
| O157                 | 2865600           | nc                | rec    | G2583_2645 | yehB      | pseudogene |
| O157                 | 2865603           | nc                | rec    | G2583_2645 | yehB      | pseudogene |
| O157                 | 2865621           | nc                | rec    | G2583_2645 | yehB      | pseudogene |
| O157                 | 2865624           | nc                | rec    | G2583_2645 | yehB      | pseudogene |
| O157                 | 2865627           | nc                | rec    | G2583_2645 | yehB      | pseudogene |
| O157                 | 2865630           | nc                | rec    | G2583_2645 | yehB      | pseudogene |
| O157                 | 2865645           | nc                | rec    | G2583_2645 | yehB      | pseudogene |
| O157                 | 2865648           | nc                | rec    | G2583_2645 | yehB      | pseudogene |
| O157                 | 2865651           | nc                | rec    | G2583_2645 | yehB      | pseudogene |
| O157                 | 2865654           | nc                | rec    | G2583_2645 | yehB      | pseudogene |
| O157                 | 2865672           | nc                | rec    | G2583_2645 | yehB      | pseudogene |
| O157                 | 2865675           | nc                | rec    | G2583_2645 | yehB      | pseudogene |
| O157                 | 2865678           | nc                | rec    | G2583_2645 | yehB      | pseudogene |
| O157                 | 2865681           | nc                | rec    | G2583_2645 | yehB      | pseudogene |
| O157                 | 2865684           | nc                | rec    | G2583_2645 | yehB      | pseudogene |
| O157                 | 2865687           | nc                | rec    | G2583_2645 | yehB      | pseudogene |
| O157                 | 2865690           | nc                | rec    | G2583_2645 | yehB      | pseudogene |



| lineage <sup>a</sup> | site <sup>b</sup> | mutation          |        | gene       | Gene name | Type       |
|----------------------|-------------------|-------------------|--------|------------|-----------|------------|
|                      |                   | type <sup>c</sup> | recomb |            |           |            |
| O157                 | 2865693           | nc                | rec    | G2583_2645 | yehB      | pseudogene |
| O157                 | 2865696           | nc                | rec    | G2583_2645 | yehB      | pseudogene |
| O157                 | 2865699           | nc                | rec    | G2583_2645 | yehB      | pseudogene |
| O157                 | 2865702           | nc                | rec    | G2583_2645 | yehB      | pseudogene |
| O157                 | 2865717           | nc                | rec    | G2583_2645 | yehB      | pseudogene |
| O157                 | 2865720           | nc                | rec    | G2583_2645 | yehB      | pseudogene |
| O157                 | 2865723           | nc                | rec    | G2583_2645 | yehB      | pseudogene |
| O157                 | 2865726           | nc                | rec    | G2583_2645 | yehB      | pseudogene |
| O157                 | 2865729           | nc                | rec    | G2583_2645 | yehB      | pseudogene |
| O157                 | 2865732           | nc                | rec    | G2583_2645 | yehB      | pseudogene |
| O157                 | 2865744           | nc                | rec    | G2583_2645 | yehB      | pseudogene |
| O157                 | 2865745           | nc                | rec    | G2583_2645 | yehB      | pseudogene |
| O157                 | 2865752           | nc                | rec    | G2583_2645 | yehB      | pseudogene |
| O157                 | 2865759           | nc                | rec    | G2583_2645 | yehB      | pseudogene |
| O157                 | 2865762           | nc                | rec    | G2583_2645 | yehB      | pseudogene |
| O157                 | 2865765           | nc                | rec    | G2583_2645 | yehB      | pseudogene |
| O157                 | 2865769           | nc                | rec    | G2583_2645 | yehB      | pseudogene |
| O157                 | 2865786           | nc                | rec    | G2583_2645 | yehB      | pseudogene |
| O157                 | 2865795           | nc                | rec    | G2583_2645 | yehB      | pseudogene |
| O157                 | 2865815           | nc                | rec    | G2583_2645 | yehB      | pseudogene |
| O157                 | 2865828           | nc                | rec    | G2583_2645 | yehB      | pseudogene |
| O157                 | 2865840           | nc                | rec    | G2583_2645 | yehB      | pseudogene |
| O157                 | 2865849           | nc                | rec    | G2583_2645 | yehB      | pseudogene |
| O157                 | 2865861           | nc                | rec    | G2583_2645 | yehB      | pseudogene |
| O157                 | 2865870           | nc                | rec    | G2583_2645 | yehB      | pseudogene |
| O157                 | 2865894           | nc                | rec    | G2583_2645 | yehB      | pseudogene |
| O157                 | 2865900           | nc                | rec    | G2583_2645 | yehB      | pseudogene |
| O157                 | 2865903           | nc                | rec    | G2583_2645 | yehB      | pseudogene |
| O157                 | 2865906           | nc                | rec    | G2583_2645 | yehB      | pseudogene |
| O157                 | 2865907           | nc                | rec    | G2583_2645 | yehB      | pseudogene |
| O157                 | 2865918           | nc                | rec    | G2583_2645 | yehB      | pseudogene |
| O157                 | 2865927           | nc                | rec    | G2583_2645 | yehB      | pseudogene |
| O157                 | 2865934           | nc                | rec    | G2583_2645 | yehB      | pseudogene |
| O157                 | 2865935           | nc                | rec    | G2583_2645 | yehB      | pseudogene |
| O157                 | 2865939           | nc                | rec    | G2583_2645 | yehB      | pseudogene |
| O157                 | 2865954           | nc                | rec    | G2583_2645 | yehB      | pseudogene |
| O157                 | 2865956           | nc                | rec    | G2583_2645 | yehB      | pseudogene |
| O157                 | 2865957           | nc                | rec    | G2583_2645 | yehB      | pseudogene |
| O157                 | 2865960           | nc                | rec    | G2583_2645 | yehB      | pseudogene |
| O157                 | 2865966           | nc                | rec    | G2583_2645 | yehB      | pseudogene |
| O157                 | 2865974           | nc                | rec    | G2583_2645 | yehB      | pseudogene |
| O157                 | 2865978           | nc                | rec    | G2583_2645 | yehB      | pseudogene |
| O157                 | 2865980           | nc                | rec    | G2583_2645 | yehB      | pseudogene |
| O157                 | 2865988           | nc                | rec    | G2583_2645 | yehB      | pseudogene |
| O157                 | 2865990           | nc                | rec    | G2583_2645 | yehB      | pseudogene |

| lineage <sup>a</sup> | site <sup>b</sup> | mutation          |        | gene       | Gene name | Type       |
|----------------------|-------------------|-------------------|--------|------------|-----------|------------|
|                      |                   | type <sup>c</sup> | recomb |            |           |            |
| O157                 | 2866002           | nc                | rec    | G2583_2645 | yehB      | pseudogene |
| O157                 | 2866005           | nc                | rec    | G2583_2645 | yehB      | pseudogene |
| O157                 | 2866018           | nc                | rec    | G2583_2645 | yehB      | pseudogene |
| O157                 | 2866020           | nc                | rec    | G2583_2645 | yehB      | pseudogene |
| O157                 | 2866023           | nc                | rec    | G2583_2645 | yehB      | pseudogene |
| O157                 | 2866029           | nc                | rec    | G2583_2645 | yehB      | pseudogene |
| O157                 | 2866034           | nc                | rec    | G2583_2645 | yehB      | pseudogene |
| O157                 | 2866035           | nc                | rec    | G2583_2645 | yehB      | pseudogene |
| O157                 | 2866041           | nc                | rec    | G2583_2645 | yehB      | pseudogene |
| O157                 | 2866044           | nc                | rec    | G2583_2645 | yehB      | pseudogene |
| O157                 | 2866056           | nc                | rec    | G2583_2645 | yehB      | pseudogene |
| O157                 | 2866065           | nc                | rec    | G2583_2645 | yehB      | pseudogene |
| O157                 | 2866071           | nc                | rec    | G2583_2645 | yehB      | pseudogene |
| O157                 | 2866077           | nc                | rec    | G2583_2645 | yehB      | pseudogene |
| O157                 | 2866085           | nc                | rec    | G2583_2645 | yehB      | pseudogene |
| O157                 | 2866089           | nc                | rec    | G2583_2645 | yehB      | pseudogene |
| O157                 | 2866101           | nc                | rec    | G2583_2645 | yehB      | pseudogene |
| O157                 | 2866107           | nc                | rec    | G2583_2645 | yehB      | pseudogene |
| O157                 | 2866110           | nc                | rec    | G2583_2645 | yehB      | pseudogene |
| O157                 | 2866122           | nc                | rec    | G2583_2645 | yehB      | pseudogene |
| O157                 | 2866128           | nc                | rec    | G2583_2645 | yehB      | pseudogene |
| O157                 | 2866155           | nc                | rec    | G2583_2645 | yehB      | pseudogene |
| O157                 | 2866158           | nc                | rec    | G2583_2645 | yehB      | pseudogene |
| O157                 | 2866167           | nc                | rec    | G2583_2645 | yehB      | pseudogene |
| O157                 | 2866182           | nc                | rec    | G2583_2645 | yehB      | pseudogene |
| O157                 | 2866185           | nc                | rec    | G2583_2645 | yehB      | pseudogene |
| O157                 | 2866203           | nc                | rec    | G2583_2645 | yehB      | pseudogene |
| O157                 | 2866206           | nc                | rec    | G2583_2645 | yehB      | pseudogene |
| O157                 | 2866212           | nc                | rec    | G2583_2645 | yehB      | pseudogene |
| O157                 | 2866215           | nc                | rec    | G2583_2645 | yehB      | pseudogene |
| O157                 | 2866219           | nc                | rec    | G2583_2645 | yehB      | pseudogene |
| O157                 | 2866227           | nc                | rec    | G2583_2645 | yehB      | pseudogene |
| O157                 | 2866233           | nc                | rec    | G2583_2645 | yehB      | pseudogene |
| O157                 | 2866242           | nc                | rec    | G2583_2645 | yehB      | pseudogene |
| O157                 | 2866248           | nc                | rec    | G2583_2645 | yehB      | pseudogene |
| O157                 | 2866252           | nc                | rec    | G2583_2645 | yehB      | pseudogene |
| O157                 | 2866253           | nc                | rec    | G2583_2645 | yehB      | pseudogene |
| O157                 | 2866256           | nc                | rec    | G2583_2645 | yehB      | pseudogene |
| O157                 | 2866260           | nc                | rec    | G2583_2645 | yehB      | pseudogene |
| O157                 | 2866262           | nc                | rec    | G2583_2645 | yehB      | pseudogene |
| O157                 | 2866271           | nc                | rec    | G2583_2645 | yehB      | pseudogene |
| O157                 | 2866275           | nc                | rec    | G2583_2645 | yehB      | pseudogene |
| O157                 | 2866286           | nc                | rec    | G2583_2645 | yehB      | pseudogene |
| O157                 | 2866287           | nc                | rec    | G2583_2645 | yehB      | pseudogene |
| O157                 | 2866293           | nc                | rec    | G2583_2645 | yehB      | pseudogene |

| lineage <sup>a</sup> | site <sup>b</sup> | mutation          |        | gene       | Gene name | Type       |
|----------------------|-------------------|-------------------|--------|------------|-----------|------------|
|                      |                   | type <sup>c</sup> | recomb |            |           |            |
| O157                 | 2866296           | nc                | rec    | G2583_2645 | yehB      | pseudogene |
| O157                 | 2866326           | nc                | rec    | G2583_2645 | yehB      | pseudogene |
| O157                 | 2866329           | nc                | rec    | G2583_2645 | yehB      | pseudogene |
| O157                 | 2866332           | nc                | rec    | G2583_2645 | yehB      | pseudogene |
| O157                 | 2866333           | nc                | rec    | G2583_2645 | yehB      | pseudogene |
| O157                 | 2866337           | nc                | rec    | G2583_2645 | yehB      | pseudogene |
| O157                 | 2866338           | nc                | rec    | G2583_2645 | yehB      | pseudogene |
| O157                 | 2866341           | nc                | rec    | G2583_2645 | yehB      | pseudogene |
| O157                 | 2866344           | nc                | rec    | G2583_2645 | yehB      | pseudogene |
| O157                 | 2866356           | nc                | rec    | G2583_2645 | yehB      | pseudogene |
| O157                 | 2866359           | nc                | rec    | G2583_2645 | yehB      | pseudogene |
| O157                 | 2866371           | nc                | rec    | G2583_2645 | yehB      | pseudogene |
| O157                 | 2866373           | nc                | rec    | G2583_2645 | yehB      | pseudogene |
| O157                 | 2866376           | nc                | rec    | G2583_2645 | yehB      | pseudogene |
| O157                 | 2866380           | nc                | rec    | G2583_2645 | yehB      | pseudogene |
| O157                 | 2866382           | nc                | rec    | G2583_2645 | yehB      | pseudogene |
| O157                 | 2866383           | nc                | rec    | G2583_2645 | yehB      | pseudogene |
| O157                 | 2866385           | nc                | rec    | G2583_2645 | yehB      | pseudogene |
| O157                 | 2866386           | nc                | rec    | G2583_2645 | yehB      | pseudogene |
| O157                 | 2866388           | nc                | rec    | G2583_2645 | yehB      | pseudogene |
| O157                 | 2866389           | nc                | rec    | G2583_2645 | yehB      | pseudogene |
| O157                 | 2866392           | nc                | rec    | G2583_2645 | yehB      | pseudogene |
| O157                 | 2866398           | nc                | rec    | G2583_2645 | yehB      | pseudogene |
| O157                 | 2866401           | nc                | rec    | G2583_2645 | yehB      | pseudogene |
| O157                 | 2866407           | nc                | rec    | G2583_2645 | yehB      | pseudogene |
| O157                 | 2866413           | nc                | rec    | G2583_2645 | yehB      | pseudogene |
| O157                 | 2866416           | nc                | rec    | G2583_2645 | yehB      | pseudogene |
| O157                 | 2866431           | nc                | rec    | G2583_2645 | yehB      | pseudogene |
| O157                 | 2866434           | nc                | rec    | G2583_2645 | yehB      | pseudogene |
| O157                 | 2866443           | nc                | rec    | G2583_2645 | yehB      | pseudogene |
| O157                 | 2866461           | nc                | rec    | G2583_2645 | yehB      | pseudogene |
| O157                 | 2866467           | nc                | rec    | G2583_2645 | yehB      | pseudogene |
| O157                 | 2866476           | nc                | rec    | G2583_2645 | yehB      | pseudogene |
| O157                 | 2866482           | nc                | rec    | G2583_2645 | yehB      | pseudogene |
| O157                 | 2866485           | nc                | rec    | G2583_2645 | yehB      | pseudogene |
| O157                 | 2866503           | nc                | rec    | G2583_2645 | yehB      | pseudogene |
| O157                 | 2866505           | nc                | rec    | G2583_2645 | yehB      | pseudogene |
| O157                 | 2866511           | nc                | rec    | G2583_2645 | yehB      | pseudogene |
| O157                 | 2866512           | nc                | rec    | G2583_2645 | yehB      | pseudogene |
| O157                 | 2866515           | nc                | rec    | G2583_2645 | yehB      | pseudogene |
| O157                 | 2866520           | nc                | rec    | G2583_2645 | yehB      | pseudogene |
| O157                 | 2866521           | nc                | rec    | G2583_2645 | yehB      | pseudogene |
| O157                 | 2866522           | nc                | rec    | G2583_2645 | yehB      | pseudogene |
| O157                 | 2866533           | nc                | rec    | G2583_2645 | yehB      | pseudogene |
| O157                 | 2866536           | nc                | rec    | G2583_2645 | yehB      | pseudogene |

| lineage <sup>a</sup> | site <sup>b</sup> | mutation          |        | gene       | Gene name | Type       |
|----------------------|-------------------|-------------------|--------|------------|-----------|------------|
|                      |                   | type <sup>c</sup> | recomb |            |           |            |
| O157                 | 2866551           | nc                | rec    | G2583_2645 | yehB      | pseudogene |
| O157                 | 2866566           | nc                | rec    | G2583_2645 | yehB      | pseudogene |
| O157                 | 2866574           | nc                | rec    | G2583_2645 | yehB      | pseudogene |
| O157                 | 2866575           | nc                | rec    | G2583_2645 | yehB      | pseudogene |
| O157                 | 2866599           | nc                | rec    | G2583_2645 | yehB      | pseudogene |
| O157                 | 2866602           | nc                | rec    | G2583_2645 | yehB      | pseudogene |
| O157                 | 2866617           | nc                | rec    | G2583_2645 | yehB      | pseudogene |
| O157                 | 2866680           | nc                | rec    | G2583_2646 | yehC      | pseudogene |
| O157                 | 2866698           | nc                | rec    | G2583_2646 | yehC      | pseudogene |
| O157                 | 2866700           | nc                | rec    | G2583_2646 | yehC      | pseudogene |
| O157                 | 2866705           | nc                | rec    | G2583_2646 | yehC      | pseudogene |
| O157                 | 2866706           | nc                | rec    | G2583_2646 | yehC      | pseudogene |
| O157                 | 2866710           | nc                | rec    | G2583_2646 | yehC      | pseudogene |
| O157                 | 2866720           | nc                | rec    | G2583_2646 | yehC      | pseudogene |
| O157                 | 2866725           | nc                | rec    | G2583_2646 | yehC      | pseudogene |
| O157                 | 2866726           | nc                | rec    | G2583_2646 | yehC      | pseudogene |
| O157                 | 2866729           | nc                | rec    | G2583_2646 | yehC      | pseudogene |
| O157                 | 2866735           | nc                | rec    | G2583_2646 | yehC      | pseudogene |
| O157                 | 2866747           | nc                | rec    | G2583_2646 | yehC      | pseudogene |
| O157                 | 2866748           | nc                | rec    | G2583_2646 | yehC      | pseudogene |
| O157                 | 2866749           | nc                | rec    | G2583_2646 | yehC      | pseudogene |
| O157                 | 2866752           | nc                | rec    | G2583_2646 | yehC      | pseudogene |
| O157                 | 2866761           | nc                | rec    | G2583_2646 | yehC      | pseudogene |
| O157                 | 2866764           | nc                | rec    | G2583_2646 | yehC      | pseudogene |
| O157                 | 2866776           | nc                | rec    | G2583_2646 | yehC      | pseudogene |
| O157                 | 2866782           | nc                | rec    | G2583_2646 | yehC      | pseudogene |
| O157                 | 2866785           | nc                | rec    | G2583_2646 | yehC      | pseudogene |
| O157                 | 2866794           | nc                | rec    | G2583_2646 | yehC      | pseudogene |
| O157                 | 2866797           | nc                | rec    | G2583_2646 | yehC      | pseudogene |
| O157                 | 2866803           | nc                | rec    | G2583_2646 | yehC      | pseudogene |
| O157                 | 2866812           | nc                | rec    | G2583_2646 | yehC      | pseudogene |
| O157                 | 2866821           | nc                | rec    | G2583_2646 | yehC      | pseudogene |
| O157                 | 2866823           | nc                | rec    | G2583_2646 | yehC      | pseudogene |
| O157                 | 2866824           | nc                | rec    | G2583_2646 | yehC      | pseudogene |
| O157                 | 2866839           | nc                | rec    | G2583_2646 | yehC      | pseudogene |
| O157                 | 2866842           | nc                | rec    | G2583_2646 | yehC      | pseudogene |
| O157                 | 2866844           | nc                | rec    | G2583_2646 | yehC      | pseudogene |
| O157                 | 2866845           | nc                | rec    | G2583_2646 | yehC      | pseudogene |
| O157                 | 2866846           | nc                | rec    | G2583_2646 | yehC      | pseudogene |
| O157                 | 2866847           | nc                | rec    | G2583_2646 | yehC      | pseudogene |
| O157                 | 2866851           | nc                | rec    | G2583_2646 | yehC      | pseudogene |
| O157                 | 2866854           | nc                | rec    | G2583_2646 | yehC      | pseudogene |
| O157                 | 2866857           | nc                | rec    | G2583_2646 | yehC      | pseudogene |
| O157                 | 2866861           | nc                | rec    | G2583_2646 | yehC      | pseudogene |
| O157                 | 2866863           | nc                | rec    | G2583_2646 | yehC      | pseudogene |

| lineage <sup>a</sup> | site <sup>b</sup> | mutation          |        | gene       | Gene name | Type       |
|----------------------|-------------------|-------------------|--------|------------|-----------|------------|
|                      |                   | type <sup>c</sup> | recomb |            |           |            |
| O157                 | 2866866           | nc                | rec    | G2583_2646 | yehC      | pseudogene |
| O157                 | 2866867           | nc                | rec    | G2583_2646 | yehC      | pseudogene |
| O157                 | 2866872           | nc                | rec    | G2583_2646 | yehC      | pseudogene |
| O157                 | 2866881           | nc                | rec    | G2583_2646 | yehC      | pseudogene |
| O157                 | 2866886           | nc                | rec    | G2583_2646 | yehC      | pseudogene |
| O157                 | 2866908           | nc                | rec    | G2583_2646 | yehC      | pseudogene |
| O157                 | 2866911           | nc                | rec    | G2583_2646 | yehC      | pseudogene |
| O157                 | 2866914           | nc                | rec    | G2583_2646 | yehC      | pseudogene |
| O157                 | 2866919           | ins               | rec    | G2583_2646 | yehC      | pseudogene |
| O157                 | 2866923           | nc                | rec    | G2583_2646 | yehC      | pseudogene |
| O157                 | 2866926           | nc                | rec    | G2583_2646 | yehC      | pseudogene |
| O157                 | 2866944           | nc                | rec    | G2583_2646 | yehC      | pseudogene |
| O157                 | 2866950           | nc                | rec    | G2583_2646 | yehC      | pseudogene |
| O157                 | 2866953           | nc                | rec    | G2583_2646 | yehC      | pseudogene |
| O157                 | 2866955           | nc                | rec    | G2583_2646 | yehC      | pseudogene |
| O157                 | 2866956           | nc                | rec    | G2583_2646 | yehC      | pseudogene |
| O157                 | 2866965           | nc                | rec    | G2583_2646 | yehC      | pseudogene |
| O157                 | 2866971           | nc                | rec    | G2583_2646 | yehC      | pseudogene |
| O157                 | 2866973           | nc                | rec    | G2583_2646 | yehC      | pseudogene |
| O157                 | 2866980           | nc                | rec    | G2583_2646 | yehC      | pseudogene |
| O157                 | 2866986           | nc                | rec    | G2583_2646 | yehC      | pseudogene |
| O157                 | 2867007           | nc                | rec    | G2583_2646 | yehC      | pseudogene |
| O157                 | 2867019           | nc                | rec    | G2583_2646 | yehC      | pseudogene |
| O157                 | 2867025           | nc                | rec    | G2583_2646 | yehC      | pseudogene |
| O157                 | 2867032           | nc                | rec    | G2583_2646 | yehC      | pseudogene |
| O157                 | 2867037           | nc                | rec    | G2583_2646 | yehC      | pseudogene |
| O157                 | 2867039           | nc                | rec    | G2583_2646 | yehC      | pseudogene |
| O157                 | 2867046           | nc                | rec    | G2583_2646 | yehC      | pseudogene |
| O157                 | 2867052           | nc                | rec    | G2583_2646 | yehC      | pseudogene |
| O157                 | 2867058           | nc                | rec    | G2583_2646 | yehC      | pseudogene |
| O157                 | 2867066           | nc                | rec    | G2583_2646 | yehC      | pseudogene |
| O157                 | 2867070           | nc                | rec    | G2583_2646 | yehC      | pseudogene |
| O157                 | 2867076           | nc                | rec    | G2583_2646 | yehC      | pseudogene |
| O157                 | 2867082           | nc                | rec    | G2583_2646 | yehC      | pseudogene |
| O157                 | 2867086           | nc                | rec    | G2583_2646 | yehC      | pseudogene |
| O157                 | 2867090           | nc                | rec    | G2583_2646 | yehC      | pseudogene |
| O157                 | 2867094           | nc                | rec    | G2583_2646 | yehC      | pseudogene |
| O157                 | 2867095           | nc                | rec    | G2583_2646 | yehC      | pseudogene |
| O157                 | 2867097           | nc                | rec    | G2583_2646 | yehC      | pseudogene |
| O157                 | 2867130           | nc                | rec    | G2583_2646 | yehC      | pseudogene |
| O157                 | 2867139           | nc                | rec    | G2583_2646 | yehC      | pseudogene |
| O157                 | 2867142           | nc                | rec    | G2583_2646 | yehC      | pseudogene |
| O157                 | 2867144           | nc                | rec    | G2583_2646 | yehC      | pseudogene |
| O157                 | 2867145           | nc                | rec    | G2583_2646 | yehC      | pseudogene |
| O157                 | 2867151           | nc                | rec    | G2583_2646 | yehC      | pseudogene |

| lineage <sup>a</sup> | site <sup>b</sup> | mutation          |        | gene       | Gene name | Type       |
|----------------------|-------------------|-------------------|--------|------------|-----------|------------|
|                      |                   | type <sup>c</sup> | recomb |            |           |            |
| O157                 | 2867177           | nc                | rec    | G2583_2646 | yehC      | pseudogene |
| O157                 | 2867187           | nc                | rec    | G2583_2646 | yehC      | pseudogene |
| O157                 | 2867199           | nc                | rec    | G2583_2646 | yehC      | pseudogene |
| O157                 | 2867207           | nc                | rec    | G2583_2646 | yehC      | pseudogene |
| O157                 | 2867208           | nc                | rec    | G2583_2646 | yehC      | pseudogene |
| O157                 | 2867211           | nc                | rec    | G2583_2646 | yehC      | pseudogene |
| O157                 | 2867217           | nc                | rec    | G2583_2646 | yehC      | pseudogene |
| O157                 | 2867220           | nc                | rec    | G2583_2646 | yehC      | pseudogene |
| O157                 | 2867226           | nc                | rec    | G2583_2646 | yehC      | pseudogene |
| O157                 | 2867228           | nc                | rec    | G2583_2646 | yehC      | pseudogene |
| O157                 | 2867229           | nc                | rec    | G2583_2646 | yehC      | pseudogene |
| O157                 | 2867244           | nc                | rec    | G2583_2646 | yehC      | pseudogene |
| O157                 | 2867247           | nc                | rec    | G2583_2646 | yehC      | pseudogene |
| O157                 | 2867250           | nc                | rec    | G2583_2646 | yehC      | pseudogene |
| O157                 | 2867257           | nc                | rec    | G2583_2646 | yehC      | pseudogene |
| O157                 | 2867259           | nc                | rec    | G2583_2646 | yehC      | pseudogene |
| O157                 | 2867265           | nc                | rec    | G2583_2646 | yehC      | pseudogene |
| O157                 | 2867277           | nc                | rec    | G2583_2646 | yehC      | pseudogene |
| Sakai                | 2867278           | nc                |        | G2583_2646 | yehC      | pseudogene |
| O157                 | 2867280           | nc                | rec    | G2583_2646 | yehC      | pseudogene |
| O157                 | 2867283           | nc                | rec    | G2583_2646 | yehC      | pseudogene |
| O157                 | 2867285           | nc                | rec    | G2583_2646 | yehC      | pseudogene |
| O157                 | 2867286           | nc                | rec    | G2583_2646 | yehC      | pseudogene |
| O157                 | 2867288           | nc                | rec    | G2583_2646 | yehC      | pseudogene |
| O157                 | 2867296           | nc                | rec    | G2583_2646 | yehC      | pseudogene |
| O157                 | 2867298           | nc                | rec    | G2583_2646 | yehC      | pseudogene |
| O157                 | 2867316           | nc                | rec    | G2583_2646 | yehC      | pseudogene |
| O157                 | 2867339           | nc                | rec    | G2583_2646 | yehC      | pseudogene |
| O157                 | 2867343           | nc                | rec    | G2583_2646 | yehC      | pseudogene |
| O157                 | 2867345           | nc                | rec    | G2583_2646 | yehC      | pseudogene |
| O157                 | 2867346           | nc                | rec    | G2583_2646 | yehC      | pseudogene |
| O157                 | 2867347           | ins-2             | rec    | G2583_2646 | yehC      | pseudogene |
| O157                 | 2867349           | nc                | rec    | G2583_2646 | yehC      | pseudogene |
| O157                 | 2867359           | nc                | rec    | G2583_2646 | yehC      | pseudogene |
| O157                 | 2867360           | i                 | rec    | intergenic |           |            |
| O157                 | 2867361           | i                 | rec    | intergenic |           |            |
| O157                 | 2867364           | i                 | rec    | intergenic |           |            |
| O157                 | 2867373           | i                 | rec    | intergenic |           |            |
| O157                 | 2867376           | i                 | rec    | intergenic |           |            |
| O157                 | 2867378           | i                 | rec    | intergenic |           |            |
| O157                 | 2867380           | i                 | rec    | intergenic |           |            |
| O157                 | 2867381           | i                 | rec    | intergenic |           |            |
| O157                 | 2867385           | i                 | rec    | intergenic |           |            |
| O157                 | 2867387           | i                 | rec    | intergenic |           |            |
| O157                 | 2867392           | ins-4             | rec    | intergenic |           |            |

| lineage <sup>a</sup> | site <sup>b</sup> | mutation          |        | gene       | Gene name | Type |
|----------------------|-------------------|-------------------|--------|------------|-----------|------|
|                      |                   | type <sup>c</sup> | recomb |            |           |      |
| O157                 | 2867397           | i                 | rec    | intergenic |           |      |
| O157                 | 2867398           | i                 | rec    | intergenic |           |      |
| O157                 | 2867399           | i                 | rec    | intergenic |           |      |
| O157                 | 2867400           | i                 | rec    | intergenic |           |      |
| O157                 | 2867407           | i                 | rec    | intergenic |           |      |
| O157                 | 2867408           | i                 | rec    | intergenic |           |      |
| O157                 | 2867411           | ins               | rec    | intergenic |           |      |
| O157                 | 2867421           | s                 | rec    | G2583_2647 | yehD      | CDS  |
| O157                 | 2867424           | s                 | rec    | G2583_2647 | yehD      | CDS  |
| O157                 | 2867438           | s                 | rec    | G2583_2647 | yehD      | CDS  |
| O157                 | 2867439           | s                 | rec    | G2583_2647 | yehD      | CDS  |
| O157                 | 2867445           | ns                | rec    | G2583_2647 | yehD      | CDS  |
| O157                 | 2867446           | ns                | rec    | G2583_2647 | yehD      | CDS  |
| O157                 | 2867447           | ns                | rec    | G2583_2647 | yehD      | CDS  |
| O157                 | 2867448           | s                 | rec    | G2583_2647 | yehD      | CDS  |
| O157                 | 2867451           | ns                | rec    | G2583_2647 | yehD      | CDS  |
| O157                 | 2867452           | ns                | rec    | G2583_2647 | yehD      | CDS  |
| O157                 | 2867453           | ns                | rec    | G2583_2647 | yehD      | CDS  |
| O157                 | 2867457           | s                 | rec    | G2583_2647 | yehD      | CDS  |
| O157                 | 2867461           | ns                | rec    | G2583_2647 | yehD      | CDS  |
| O157                 | 2867462           | ns                | rec    | G2583_2647 | yehD      | CDS  |
| O157                 | 2867463           | s                 | rec    | G2583_2647 | yehD      | CDS  |
| O157                 | 2867466           | ns                | rec    | G2583_2647 | yehD      | CDS  |
| O157                 | 2867467           | ns                | rec    | G2583_2647 | yehD      | CDS  |
| O157                 | 2867468           | ns                | rec    | G2583_2647 | yehD      | CDS  |
| O157                 | 2867469           | ns                | rec    | G2583_2647 | yehD      | CDS  |
| O157                 | 2867470           | ns                | rec    | G2583_2647 | yehD      | CDS  |
| O157                 | 2867472           | s                 | rec    | G2583_2647 | yehD      | CDS  |
| O157                 | 2867475           | s                 | rec    | G2583_2647 | yehD      | CDS  |
| O157                 | 2867480           | s                 | rec    | G2583_2647 | yehD      | CDS  |
| O157                 | 2867481           | s                 | rec    | G2583_2647 | yehD      | CDS  |
| O157                 | 2867487           | s                 | rec    | G2583_2647 | yehD      | CDS  |
| O157                 | 2867496           | s                 | rec    | G2583_2647 | yehD      | CDS  |
| O157                 | 2867505           | s                 | rec    | G2583_2647 | yehD      | CDS  |
| O157                 | 2867508           | s                 | rec    | G2583_2647 | yehD      | CDS  |
| O157                 | 2867517           | s                 | rec    | G2583_2647 | yehD      | CDS  |
| O157                 | 2867520           | ns                | rec    | G2583_2647 | yehD      | CDS  |
| O157                 | 2867523           | s                 | rec    | G2583_2647 | yehD      | CDS  |
| O157                 | 2867526           | s                 | rec    | G2583_2647 | yehD      | CDS  |
| O157                 | 2867538           | s                 | rec    | G2583_2647 | yehD      | CDS  |
| O157                 | 2867550           | s                 | rec    | G2583_2647 | yehD      | CDS  |
| O157                 | 2867556           | s                 | rec    | G2583_2647 | yehD      | CDS  |
| O157                 | 2867561           | ns                | rec    | G2583_2647 | yehD      | CDS  |
| O157                 | 2867568           | s                 | rec    | G2583_2647 | yehD      | CDS  |
| O157                 | 2867571           | s                 | rec    | G2583_2647 | yehD      | CDS  |

| lineage <sup>a</sup> | site <sup>b</sup> | mutation          |        | gene       | Gene name | Type |
|----------------------|-------------------|-------------------|--------|------------|-----------|------|
|                      |                   | type <sup>c</sup> | recomb |            |           |      |
| O157                 | 2867574           | s                 | rec    | G2583_2647 | yehD      | CDS  |
| O157                 | 2867578           | ns                | rec    | G2583_2647 | yehD      | CDS  |
| O157                 | 2867583           | s                 | rec    | G2583_2647 | yehD      | CDS  |
| O157                 | 2867586           | s                 | rec    | G2583_2647 | yehD      | CDS  |
| O157                 | 2867601           | s                 | rec    | G2583_2647 | yehD      | CDS  |
| O157                 | 2867604           | s                 | rec    | G2583_2647 | yehD      | CDS  |
| O157                 | 2867607           | s                 | rec    | G2583_2647 | yehD      | CDS  |
| O157                 | 2867610           | s                 | rec    | G2583_2647 | yehD      | CDS  |
| O157                 | 2867613           | s                 | rec    | G2583_2647 | yehD      | CDS  |
| O157                 | 2867616           | s                 | rec    | G2583_2647 | yehD      | CDS  |
| O157                 | 2867624           | ns                | rec    | G2583_2647 | yehD      | CDS  |
| O157                 | 2867628           | s                 | rec    | G2583_2647 | yehD      | CDS  |
| O157                 | 2867637           | s                 | rec    | G2583_2647 | yehD      | CDS  |
| O157                 | 2867644           | ns                | rec    | G2583_2647 | yehD      | CDS  |
| O157                 | 2867645           | ns                | rec    | G2583_2647 | yehD      | CDS  |
| O157                 | 2867646           | s                 | rec    | G2583_2647 | yehD      | CDS  |
| O157                 | 2867652           | ns                | rec    | G2583_2647 | yehD      | CDS  |
| O157                 | 2867661           | s                 | rec    | G2583_2647 | yehD      | CDS  |
| O157                 | 2867670           | s                 | rec    | G2583_2647 | yehD      | CDS  |
| O157                 | 2867679           | s                 | rec    | G2583_2647 | yehD      | CDS  |
| O157                 | 2867683           | ns                | rec    | G2583_2647 | yehD      | CDS  |
| O157                 | 2867687           | ns                | rec    | G2583_2647 | yehD      | CDS  |
| O157                 | 2867688           | ns                | rec    | G2583_2647 | yehD      | CDS  |
| O157                 | 2867689           | ns                | rec    | G2583_2647 | yehD      | CDS  |
| O157                 | 2867690           | ns                | rec    | G2583_2647 | yehD      | CDS  |
| O157                 | 2867691           | s                 | rec    | G2583_2647 | yehD      | CDS  |
| O157                 | 2867697           | s                 | rec    | G2583_2647 | yehD      | CDS  |
| O157                 | 2867700           | ns                | rec    | G2583_2647 | yehD      | CDS  |
| O157                 | 2867701           | ns                | rec    | G2583_2647 | yehD      | CDS  |
| O157                 | 2867709           | s                 | rec    | G2583_2647 | yehD      | CDS  |
| O157                 | 2867711           | s                 | rec    | G2583_2647 | yehD      | CDS  |
| O157                 | 2867715           | s                 | rec    | G2583_2647 | yehD      | CDS  |
| O157                 | 2867730           | s                 | rec    | G2583_2647 | yehD      | CDS  |
| O157                 | 2867733           | s                 | rec    | G2583_2647 | yehD      | CDS  |
| O157                 | 2867736           | ns                | rec    | G2583_2647 | yehD      | CDS  |
| O157                 | 2867737           | ns                | rec    | G2583_2647 | yehD      | CDS  |
| O157                 | 2867745           | s                 | rec    | G2583_2647 | yehD      | CDS  |
| O157                 | 2867748           | s                 | rec    | G2583_2647 | yehD      | CDS  |
| O157                 | 2867757           | s                 | rec    | G2583_2647 | yehD      | CDS  |
| O157                 | 2867766           | ns                | rec    | G2583_2647 | yehD      | CDS  |
| O157                 | 2867772           | s                 | rec    | G2583_2647 | yehD      | CDS  |
| O157                 | 2867781           | s                 | rec    | G2583_2647 | yehD      | CDS  |
| O157                 | 2867805           | s                 | rec    | G2583_2647 | yehD      | CDS  |
| O157                 | 2867817           | s                 | rec    | G2583_2647 | yehD      | CDS  |
| O157                 | 2867820           | s                 | rec    | G2583_2647 | yehD      | CDS  |



| lineage <sup>a</sup> | site <sup>b</sup> | mutation          |        | gene       | Gene name | Type |
|----------------------|-------------------|-------------------|--------|------------|-----------|------|
|                      |                   | type <sup>c</sup> | recomb |            |           |      |
| O157                 | 2867823           | ns                | rec    | G2583_2647 | yehD      | CDS  |
| O157                 | 2867824           | ns                | rec    | G2583_2647 | yehD      | CDS  |
| O157                 | 2867826           | s                 | rec    | G2583_2647 | yehD      | CDS  |
| O157                 | 2867830           | ns                | rec    | G2583_2647 | yehD      | CDS  |
| O157                 | 2867835           | s                 | rec    | G2583_2647 | yehD      | CDS  |
| O157                 | 2867838           | s                 | rec    | G2583_2647 | yehD      | CDS  |
| O157                 | 2867853           | s                 | rec    | G2583_2647 | yehD      | CDS  |
| O157                 | 2867862           | s                 | rec    | G2583_2647 | yehD      | CDS  |
| O157                 | 2867868           | s                 | rec    | G2583_2647 | yehD      | CDS  |
| O157                 | 2867880           | s                 | rec    | G2583_2647 | yehD      | CDS  |
| O157                 | 2867883           | ns                | rec    | G2583_2647 | yehD      | CDS  |
| O157                 | 2867886           | s                 | rec    | G2583_2647 | yehD      | CDS  |
| O157                 | 2867892           | s                 | rec    | G2583_2647 | yehD      | CDS  |
| O157                 | 2867895           | ns                | rec    | G2583_2647 | yehD      | CDS  |
| O157                 | 2867897           | ns                | rec    | G2583_2647 | yehD      | CDS  |
| O157                 | 2867898           | s                 | rec    | G2583_2647 | yehD      | CDS  |
| O157                 | 2867904           | s                 | rec    | G2583_2647 | yehD      | CDS  |
| O157                 | 2867913           | ns                | rec    | G2583_2647 | yehD      | CDS  |
| O157                 | 2867915           | ns                | rec    | G2583_2647 | yehD      | CDS  |
| O157                 | 2867922           | ns                | rec    | G2583_2647 | yehD      | CDS  |
| O157                 | 2867947           | ns                | rec    | G2583_2647 | yehD      | CDS  |
| O157                 | 2867955           | i                 | rec    | intergenic |           |      |
| O157                 | 2867958           | i                 | rec    | intergenic |           |      |
| O157                 | 2867959           | i                 | rec    | intergenic |           |      |
| O157                 | 2867960           | i                 | rec    | intergenic |           |      |
| O157                 | 2867969           | del               | rec    | intergenic |           |      |
| O157                 | 2867972           | i                 | rec    | intergenic |           |      |
| O157                 | 2867981           | i                 | rec    | intergenic |           |      |
| O157                 | 2867982           | i                 | rec    | intergenic |           |      |
| O157                 | 2867983           | i                 | rec    | intergenic |           |      |
| O157                 | 2868031           | i                 | rec    | intergenic |           |      |
| O157                 | 2868059           | i                 | rec    | intergenic |           |      |
| O157                 | 2868080           | i                 | rec    | intergenic |           |      |
| O157                 | 2868082           | i                 | rec    | intergenic |           |      |
| O157                 | 2868105           | i                 | rec    | intergenic |           |      |
| O157                 | 2868108           | i                 | rec    | intergenic |           |      |
| O157                 | 2868109           | i                 | rec    | intergenic |           |      |
| O157                 | 2868110           | i                 | rec    | intergenic |           |      |
| O157                 | 2868111           | i                 | rec    | intergenic |           |      |
| O157                 | 2868112           | i                 | rec    | intergenic |           |      |
| O157                 | 2868115           | i                 | rec    | intergenic |           |      |
| O157                 | 2868116           | i                 | rec    | intergenic |           |      |
| O157                 | 2868120           | i                 | rec    | intergenic |           |      |
| O157                 | 2868125           | i                 | rec    | intergenic |           |      |
| O157                 | 2868127           | i                 | rec    | intergenic |           |      |

| lineage <sup>a</sup> | site <sup>b</sup> | mutation          |        | gene       | Gene name | Type |
|----------------------|-------------------|-------------------|--------|------------|-----------|------|
|                      |                   | type <sup>c</sup> | recomb |            |           |      |
| O157                 | 2868128           | i                 | rec    | intergenic |           |      |
| O157                 | 2868129           | i                 | rec    | intergenic |           |      |
| O157                 | 2868131           | i                 | rec    | intergenic |           |      |
| O157                 | 2868132           | i                 | rec    | intergenic |           |      |
| O157                 | 2868133           | i                 | rec    | intergenic |           |      |
| O157                 | 2868142           | i                 | rec    | intergenic |           |      |
| O157                 | 2868143           | i                 | rec    | intergenic |           |      |
| O157                 | 2868147           | i                 | rec    | intergenic |           |      |
| O157                 | 2868151           | i                 | rec    | intergenic |           |      |
| O157                 | 2868152           | i                 | rec    | intergenic |           |      |
| O157                 | 2868153           | i                 | rec    | intergenic |           |      |
| O157                 | 2868160           | i                 | rec    | intergenic |           |      |
| O157                 | 2868161           | i                 | rec    | intergenic |           |      |
| O157                 | 2868162           | i                 | rec    | intergenic |           |      |
| O157                 | 2868166           | i                 | rec    | intergenic |           |      |
| O157                 | 2868167           | i                 | rec    | intergenic |           |      |
| O157                 | 2868170           | i                 | rec    | intergenic |           |      |
| O157                 | 2868171           | i                 | rec    | intergenic |           |      |
| O157                 | 2868174           | i                 | rec    | intergenic |           |      |
| O157                 | 2868177           | del               | rec    | intergenic |           |      |
| O157                 | 2868187           | i                 | rec    | intergenic |           |      |
| O157                 | 2868196           | i                 | rec    | intergenic |           |      |
| O157                 | 2868200           | i                 | rec    | intergenic |           |      |
| O157                 | 2868201           | i                 | rec    | intergenic |           |      |
| O157                 | 2868210           | i                 | rec    | intergenic |           |      |
| O157                 | 2868217           | i                 | rec    | intergenic |           |      |
| O157                 | 2868223           | i                 | rec    | intergenic |           |      |
| O157                 | 2868224           | i                 | rec    | intergenic |           |      |
| O157                 | 2868225           | i                 | rec    | intergenic |           |      |
| O157                 | 2868226           | i                 | rec    | intergenic |           |      |
| O157                 | 2868233           | i                 | rec    | intergenic |           |      |
| O157                 | 2868234           | i                 | rec    | intergenic |           |      |
| O157                 | 2868235           | i                 | rec    | intergenic |           |      |
| O157                 | 2868236           | i                 | rec    | intergenic |           |      |
| O157                 | 2868241           | i                 | rec    | intergenic |           |      |
| O157                 | 2868271           | ns                | rec    | G2583_2648 | yehE      | CDS  |
| O157                 | 2868272           | ns                | rec    | G2583_2648 | yehE      | CDS  |
| O157                 | 2868273           | s                 | rec    | G2583_2648 | yehE      | CDS  |
| O157                 | 2868280           | ns                | rec    | G2583_2648 | yehE      | CDS  |
| O157                 | 2868281           | ns                | rec    | G2583_2648 | yehE      | CDS  |
| O157                 | 2868282           | ns                | rec    | G2583_2648 | yehE      | CDS  |
| O157                 | 2868284           | ns                | rec    | G2583_2648 | yehE      | CDS  |
| O157                 | 2868286           | ns                | rec    | G2583_2648 | yehE      | CDS  |
| O157                 | 2868291           | ns                | rec    | G2583_2648 | yehE      | CDS  |
| O157                 | 2868292           | ns                | rec    | G2583_2648 | yehE      | CDS  |

| lineage <sup>a</sup> | site <sup>b</sup> | mutation          |        | gene       | Gene name | Type |
|----------------------|-------------------|-------------------|--------|------------|-----------|------|
|                      |                   | type <sup>c</sup> | recomb |            |           |      |
| O157                 | 2868295           | ns                | rec    | G2583_2648 | yehE      | CDS  |
| O157                 | 2868297           | s                 | rec    | G2583_2648 | yehE      | CDS  |
| O157                 | 2868312           | s                 | rec    | G2583_2648 | yehE      | CDS  |
| O157                 | 2868315           | s                 | rec    | G2583_2648 | yehE      | CDS  |
| O157                 | 2868321           | ns                | rec    | G2583_2648 | yehE      | CDS  |
| O157                 | 2868322           | ns                | rec    | G2583_2648 | yehE      | CDS  |
| O157                 | 2868324           | ns                | rec    | G2583_2648 | yehE      | CDS  |
| O157                 | 2868326           | ns                | rec    | G2583_2648 | yehE      | CDS  |
| O157                 | 2868327           | s                 | rec    | G2583_2648 | yehE      | CDS  |
| O157                 | 2868334           | ns                | rec    | G2583_2648 | yehE      | CDS  |
| O157                 | 2868336           | ns                | rec    | G2583_2648 | yehE      | CDS  |
| O157                 | 2868337           | ns                | rec    | G2583_2648 | yehE      | CDS  |
| O157                 | 2868341           | ns                | rec    | G2583_2648 | yehE      | CDS  |
| O157                 | 2868342           | ns                | rec    | G2583_2648 | yehE      | CDS  |
| O157                 | 2868343           | ns                | rec    | G2583_2648 | yehE      | CDS  |
| O157                 | 2868344           | ns                | rec    | G2583_2648 | yehE      | CDS  |
| O157                 | 2868348           | ns                | rec    | G2583_2648 | yehE      | CDS  |
| O157                 | 2868351           | s                 | rec    | G2583_2648 | yehE      | CDS  |
| O157                 | 2868354           | ns                | rec    | G2583_2648 | yehE      | CDS  |
| O157                 | 2868355           | ns                | rec    | G2583_2648 | yehE      | CDS  |
| O157                 | 2868356           | ns                | rec    | G2583_2648 | yehE      | CDS  |
| O157                 | 2868357           | ns                | rec    | G2583_2648 | yehE      | CDS  |
| O157                 | 2868359           | ns                | rec    | G2583_2648 | yehE      | CDS  |
| O157                 | 2868360           | ns                | rec    | G2583_2648 | yehE      | CDS  |
| O157                 | 2868361           | ns                | rec    | G2583_2648 | yehE      | CDS  |
| O157                 | 2868362           | ns                | rec    | G2583_2648 | yehE      | CDS  |
| O157                 | 2868363           | s                 | rec    | G2583_2648 | yehE      | CDS  |
| O157                 | 2868369           | s                 | rec    | G2583_2648 | yehE      | CDS  |
| O157                 | 2868376           | ns                | rec    | G2583_2648 | yehE      | CDS  |
| O157                 | 2868378           | s                 | rec    | G2583_2648 | yehE      | CDS  |
| O157                 | 2868381           | s                 | rec    | G2583_2648 | yehE      | CDS  |
| O157                 | 2868385           | ns                | rec    | G2583_2648 | yehE      | CDS  |
| O157                 | 2868387           | ns                | rec    | G2583_2648 | yehE      | CDS  |
| O157                 | 2868391           | ns                | rec    | G2583_2648 | yehE      | CDS  |
| O157                 | 2868399           | ns                | rec    | G2583_2648 | yehE      | CDS  |
| O157                 | 2868401           | ns                | rec    | G2583_2648 | yehE      | CDS  |
| O157                 | 2868403           | ns                | rec    | G2583_2648 | yehE      | CDS  |
| O157                 | 2868417           | s                 | rec    | G2583_2648 | yehE      | CDS  |
| O157                 | 2868422           | ns                | rec    | G2583_2648 | yehE      | CDS  |
| O157                 | 2868426           | s                 | rec    | G2583_2648 | yehE      | CDS  |
| O157                 | 2868429           | s                 | rec    | G2583_2648 | yehE      | CDS  |
| O157                 | 2868438           | s                 | rec    | G2583_2648 | yehE      | CDS  |
| O157                 | 2868441           | s                 | rec    | G2583_2648 | yehE      | CDS  |
| O157                 | 2868450           | ns                | rec    | G2583_2648 | yehE      | CDS  |
| O157                 | 2868452           | ns                | rec    | G2583_2648 | yehE      | CDS  |

| lineage <sup>a</sup> | site <sup>b</sup> | mutation          |        | gene       | Gene name | Type |
|----------------------|-------------------|-------------------|--------|------------|-----------|------|
|                      |                   | type <sup>c</sup> | recomb |            |           |      |
| O157                 | 2868456           | ns                | rec    | G2583_2648 | yehE      | CDS  |
| O157                 | 2868459           | s                 | rec    | G2583_2648 | yehE      | CDS  |
| O157                 | 2868474           | s                 | rec    | G2583_2648 | yehE      | CDS  |
| O157                 | 2868477           | s                 | rec    | G2583_2648 | yehE      | CDS  |
| O157                 | 2868480           | s                 | rec    | G2583_2648 | yehE      | CDS  |
| O157                 | 2868482           | s                 | rec    | G2583_2648 | yehE      | CDS  |
| O157                 | 2868489           | s                 | rec    | G2583_2648 | yehE      | CDS  |
| O157                 | 2868500           | ns                | rec    | G2583_2648 | yehE      | CDS  |
| O157                 | 2868502           | ns                | rec    | G2583_2648 | yehE      | CDS  |
| O157                 | 2868503           | ns                | rec    | G2583_2648 | yehE      | CDS  |
| O157                 | 2868512           | s                 | rec    | G2583_2648 | yehE      | CDS  |
| O157                 | 2868558           | del               | rec    | intergenic |           |      |
| O157                 | 2868561           | i                 | rec    | intergenic |           |      |
| O157                 | 2868566           | i                 | rec    | intergenic |           |      |
| O157                 | 2868580           | i                 | rec    | intergenic |           |      |
| O157                 | 2868598           | i                 | rec    | intergenic |           |      |
| O157                 | 2868607           | ins               | rec    | intergenic |           |      |
| O157                 | 2868613           | i                 | rec    | intergenic |           |      |
| O157                 | 2868623           | i                 | rec    | intergenic |           |      |
| O157                 | 2868626           | i                 | rec    | intergenic |           |      |
| O157                 | 2868627           | i                 | rec    | intergenic |           |      |
| O157                 | 2868630           | i                 | rec    | intergenic |           |      |
| O157                 | 2868633           | i                 | rec    | intergenic |           |      |
| O157                 | 2868634           | i                 | rec    | intergenic |           |      |
| O157                 | 2868637           | i                 | rec    | intergenic |           |      |
| O157                 | 2868640           | i                 | rec    | intergenic |           |      |
| O157                 | 2868649           | i                 | rec    | intergenic |           |      |
| O157                 | 2868657           | i                 | rec    | intergenic |           |      |
| O157                 | 2868668           | i                 | rec    | intergenic |           |      |
| O157                 | 2868672           | i                 | rec    | intergenic |           |      |
| O157                 | 2868676           | i                 | rec    | intergenic |           |      |
| O157                 | 2868678           | i                 | rec    | intergenic |           |      |
| O157                 | 2868741           | i                 | rec    | intergenic |           |      |
| O157                 | 2868768           | i                 | rec    | intergenic |           |      |
| O157                 | 2868948           | s                 | rec    | G2583_2649 | mrp       | CDS  |
| O157                 | 2868951           | s                 | rec    | G2583_2649 | mrp       | CDS  |
| O157                 | 2868975           | s                 | rec    | G2583_2649 | mrp       | CDS  |
| O157                 | 2868981           | s                 | rec    | G2583_2649 | mrp       | CDS  |
| O157                 | 2868990           | s                 | rec    | G2583_2649 | mrp       | CDS  |
| O157                 | 2868993           | s                 | rec    | G2583_2649 | mrp       | CDS  |
| O157                 | 2869020           | s                 | rec    | G2583_2649 | mrp       | CDS  |
| O157                 | 2870369           | s                 | rec    | G2583_2650 | metG      | CDS  |
| O157                 | 2870540           | s                 | rec    | G2583_2650 | metG      | CDS  |
| O157                 | 2870575           | s                 | rec    | G2583_2650 | metG      | CDS  |
| O157                 | 2870707           | s                 | rec    | G2583_2650 | metG      | CDS  |

| lineage <sup>a</sup> | site <sup>b</sup> | mutation          |        | gene       | Gene name | Type |
|----------------------|-------------------|-------------------|--------|------------|-----------|------|
|                      |                   | type <sup>c</sup> | recomb |            |           |      |
| O157                 | 2870794           | s                 | rec    | G2583_2650 | metG      | CDS  |
| O157                 | 2870938           | s                 | rec    | G2583_2650 | metG      | CDS  |
| O157                 | 2870950           | s                 | rec    | G2583_2650 | metG      | CDS  |
| O157                 | 2870990           | s                 | rec    | G2583_2650 | metG      | CDS  |
| O157                 | 2871001           | s                 | rec    | G2583_2650 | metG      | CDS  |
| O157                 | 2871013           | s                 | rec    | G2583_2650 | metG      | CDS  |
| O157                 | 2871022           | s                 | rec    | G2583_2650 | metG      | CDS  |
| O157                 | 2871034           | s                 | rec    | G2583_2650 | metG      | CDS  |
| O157                 | 2871355           | s                 | rec    | G2583_2650 | metG      | CDS  |
| O157                 | 2871364           | s                 | rec    | G2583_2650 | metG      | CDS  |
| O157                 | 2871424           | s                 | rec    | G2583_2650 | metG      | CDS  |
| O157                 | 2871445           | s                 | rec    | G2583_2650 | metG      | CDS  |
| O157                 | 2871457           | s                 | rec    | G2583_2650 | metG      | CDS  |
| O157                 | 2871466           | s                 | rec    | G2583_2650 | metG      | CDS  |
| O157                 | 2871499           | s                 | rec    | G2583_2650 | metG      | CDS  |
| O157                 | 2871508           | s                 | rec    | G2583_2650 | metG      | CDS  |
| O157                 | 2871529           | s                 | rec    | G2583_2650 | metG      | CDS  |
| O157                 | 2871532           | s                 | rec    | G2583_2650 | metG      | CDS  |
| O157                 | 2871535           | s                 | rec    | G2583_2650 | metG      | CDS  |
| O157                 | 2871547           | s                 | rec    | G2583_2650 | metG      | CDS  |
| O157                 | 2871590           | s                 | rec    | G2583_2650 | metG      | CDS  |
| O157                 | 2871598           | s                 | rec    | G2583_2650 | metG      | CDS  |
| O157                 | 2871613           | s                 | rec    | G2583_2650 | metG      | CDS  |
| O157                 | 2871643           | s                 | rec    | G2583_2650 | metG      | CDS  |
| O157                 | 2871667           | s                 | rec    | G2583_2650 | metG      | CDS  |
| O157                 | 2871688           | s                 | rec    | G2583_2650 | metG      | CDS  |
| O157                 | 2871700           | s                 | rec    | G2583_2650 | metG      | CDS  |
| O157                 | 2871703           | s                 | rec    | G2583_2650 | metG      | CDS  |
| O157                 | 2871712           | s                 | rec    | G2583_2650 | metG      | CDS  |
| O157                 | 2871721           | s                 | rec    | G2583_2650 | metG      | CDS  |
| O157                 | 2871760           | s                 | rec    | G2583_2650 | metG      | CDS  |
| O157                 | 2871826           | s                 | rec    | G2583_2650 | metG      | CDS  |
| O157                 | 2871886           | s                 | rec    | G2583_2650 | metG      | CDS  |
| O157                 | 2871892           | s                 | rec    | G2583_2650 | metG      | CDS  |
| O157                 | 2872066           | i                 | rec    | intergenic |           |      |
| O157                 | 2872069           | i                 | rec    | intergenic |           |      |
| O157                 | 2872082           | i                 | rec    | intergenic |           |      |
| O157                 | 2872127           | i                 | rec    | intergenic |           |      |
| O157                 | 2872151           | i                 | rec    | intergenic |           |      |
| O157                 | 2872337           | ns                | rec    | G2583_2651 | molR_A    | CDS  |
| O157                 | 2872341           | s                 | rec    | G2583_2651 | molR_A    | CDS  |
| O157                 | 2872349           | ns                | rec    | G2583_2651 | molR_A    | CDS  |
| O157                 | 2872357           | ns                | rec    | G2583_2651 | molR_A    | CDS  |
| O157                 | 2872359           | ns                | rec    | G2583_2651 | molR_A    | CDS  |
| O157                 | 2872362           | s                 | rec    | G2583_2651 | molR_A    | CDS  |

| lineage <sup>a</sup> | site <sup>b</sup> | mutation          |        | gene       | Gene name | Type |
|----------------------|-------------------|-------------------|--------|------------|-----------|------|
|                      |                   | type <sup>c</sup> | recomb |            |           |      |
| O157                 | 2872368           | s                 | rec    | G2583_2651 | molR_A    | CDS  |
| O157                 | 2872374           | s                 | rec    | G2583_2651 | molR_A    | CDS  |
| O157                 | 2872434           | s                 | rec    | G2583_2651 | molR_A    | CDS  |
| O157                 | 2872488           | s                 | rec    | G2583_2651 | molR_A    | CDS  |
| O157                 | 2872506           | s                 | rec    | G2583_2651 | molR_A    | CDS  |
| O157                 | 2872509           | s                 | rec    | G2583_2651 | molR_A    | CDS  |
| O157                 | 2872514           | ns                | rec    | G2583_2651 | molR_A    | CDS  |
| O157                 | 2872516           | ns                | rec    | G2583_2651 | molR_A    | CDS  |
| O157                 | 2872533           | s                 | rec    | G2583_2651 | molR_A    | CDS  |
| O157                 | 2872623           | s                 | rec    | G2583_2651 | molR_A    | CDS  |
| O157                 | 2872662           | s                 | rec    | G2583_2651 | molR_A    | CDS  |
| O157                 | 2872697           | ns                | rec    | G2583_2651 | molR_A    | CDS  |
| O157                 | 2872702           | ns                | rec    | G2583_2651 | molR_A    | CDS  |
| O157                 | 2872706           | ns                | rec    | G2583_2651 | molR_A    | CDS  |
| O157                 | 2872709           | ns                | rec    | G2583_2651 | molR_A    | CDS  |
| O157                 | 2872725           | s                 | rec    | G2583_2651 | molR_A    | CDS  |
| O157                 | 2872743           | s                 | rec    | G2583_2651 | molR_A    | CDS  |
| O157                 | 2872761           | s                 | rec    | G2583_2651 | molR_A    | CDS  |
| O157                 | 2872777           | ns                | rec    | G2583_2651 | molR_A    | CDS  |
| O157                 | 2872824           | s                 | rec    | G2583_2651 | molR_A    | CDS  |
| O157                 | 2872838           | ns                | rec    | G2583_2651 | molR_A    | CDS  |
| O157                 | 2872843           | ns                | rec    | G2583_2651 | molR_A    | CDS  |
| O157                 | 2872845           | ns                | rec    | G2583_2651 | molR_A    | CDS  |
| O157                 | 2872848           | s                 | rec    | G2583_2651 | molR_A    | CDS  |
| O157                 | 2872857           | s                 | rec    | G2583_2651 | molR_A    | CDS  |
| O157                 | 2872859           | ns                | rec    | G2583_2651 | molR_A    | CDS  |
| O157                 | 2872892           | ns                | rec    | G2583_2651 | molR_A    | CDS  |
| O157                 | 2872909           | ns                | rec    | G2583_2651 | molR_A    | CDS  |
| O157                 | 2872931           | ns                | rec    | G2583_2651 | molR_A    | CDS  |
| O157                 | 2873005           | ns                | rec    | G2583_2651 | molR_A    | CDS  |
| O157                 | 2873007           | ns                | rec    | G2583_2651 | molR_A    | CDS  |
| O157                 | 2873010           | s                 | rec    | G2583_2651 | molR_A    | CDS  |
| O157                 | 2873016           | s                 | rec    | G2583_2651 | molR_A    | CDS  |
| O157                 | 2873017           | ns                | rec    | G2583_2651 | molR_A    | CDS  |
| O157                 | 2873028           | s                 | rec    | G2583_2651 | molR_A    | CDS  |
| O157                 | 2873035           | ns                | rec    | G2583_2651 | molR_A    | CDS  |
| O157                 | 2873076           | s                 | rec    | G2583_2651 | molR_A    | CDS  |
| O157                 | 2873080           | ns                | rec    | G2583_2651 | molR_A    | CDS  |
| O157                 | 2873088           | ns                | rec    | G2583_2651 | molR_A    | CDS  |
| O157                 | 2873090           | ns                | rec    | G2583_2651 | molR_A    | CDS  |
| O157                 | 2873091           | ns                | rec    | G2583_2651 | molR_A    | CDS  |
| O157                 | 2873097           | s                 | rec    | G2583_2651 | molR_A    | CDS  |
| O157                 | 2873115           | s                 | rec    | G2583_2651 | molR_A    | CDS  |
| O157                 | 2873124           | ns                | rec    | G2583_2651 | molR_A    | CDS  |
| O157                 | 2873136           | ns                | rec    | G2583_2651 | molR_A    | CDS  |

| lineage <sup>a</sup> | site <sup>b</sup> | mutation          |        | gene       | Gene name | Type |
|----------------------|-------------------|-------------------|--------|------------|-----------|------|
|                      |                   | type <sup>c</sup> | recomb |            |           |      |
| O157                 | 2873137           | ns                | rec    | G2583_2651 | molR_A    | CDS  |
| O157                 | 2873140           | ns                | rec    | G2583_2651 | molR_A    | CDS  |
| O157                 | 2873143           | ns                | rec    | G2583_2651 | molR_A    | CDS  |
| O157                 | 2873147           | ns                | rec    | G2583_2651 | molR_A    | CDS  |
| O157                 | 2873155           | ns                | rec    | G2583_2651 | molR_A    | CDS  |
| O157                 | 2873156           | ns                | rec    | G2583_2651 | molR_A    | CDS  |
| O157                 | 2873160           | s                 | rec    | G2583_2651 | molR_A    | CDS  |
| O157                 | 2873164           | ns                | rec    | G2583_2651 | molR_A    | CDS  |
| O157                 | 2873165           | ns                | rec    | G2583_2651 | molR_A    | CDS  |
| O157                 | 2873166           | ns                | rec    | G2583_2651 | molR_A    | CDS  |
| O157                 | 2873168           | ns                | rec    | G2583_2651 | molR_A    | CDS  |
| O157                 | 2873169           | ns                | rec    | G2583_2651 | molR_A    | CDS  |
| O157                 | 2873170           | ns                | rec    | G2583_2651 | molR_A    | CDS  |
| O157                 | 2873171           | ns                | rec    | G2583_2651 | molR_A    | CDS  |
| O157                 | 2873181           | s                 | rec    | G2583_2651 | molR_A    | CDS  |
| O157                 | 2873183           | ns                | rec    | G2583_2651 | molR_A    | CDS  |
| O157                 | 2873184           | ns                | rec    | G2583_2651 | molR_A    | CDS  |
| O157                 | 2873194           | s                 | rec    | G2583_2651 | molR_A    | CDS  |
| O157                 | 2873196           | s                 | rec    | G2583_2651 | molR_A    | CDS  |
| O157                 | 2873200           | ns                | rec    | G2583_2651 | molR_A    | CDS  |
| O157                 | 2873201           | ns                | rec    | G2583_2651 | molR_A    | CDS  |
| O157                 | 2873208           | s                 | rec    | G2583_2651 | molR_A    | CDS  |
| O157                 | 2873211           | s                 | rec    | G2583_2651 | molR_A    | CDS  |
| O157                 | 2873214           | ins-9             | rec    | G2583_2651 | molR_A    | CDS  |
| O157                 | 2873223           | ns                | rec    | G2583_2651 | molR_A    | CDS  |
| O157                 | 2873232           | s                 | rec    | G2583_2651 | molR_A    | CDS  |
| O157                 | 2873234           | ns                | rec    | G2583_2651 | molR_A    | CDS  |
| O157                 | 2873239           | s                 | rec    | G2583_2651 | molR_A    | CDS  |
| O157                 | 2873253           | s                 | rec    | G2583_2651 | molR_A    | CDS  |
| O157                 | 2873254           | ns                | rec    | G2583_2651 | molR_A    | CDS  |
| O157                 | 2873259           | s                 | rec    | G2583_2651 | molR_A    | CDS  |
| O157                 | 2873274           | s                 | rec    | G2583_2651 | molR_A    | CDS  |
| O157                 | 2873280           | s                 | rec    | G2583_2651 | molR_A    | CDS  |
| O157                 | 2873281           | ns                | rec    | G2583_2651 | molR_A    | CDS  |
| O157                 | 2873284           | ns                | rec    | G2583_2651 | molR_A    | CDS  |
| O157                 | 2873286           | ns                | rec    | G2583_2651 | molR_A    | CDS  |
| O157                 | 2873287           | ns                | rec    | G2583_2651 | molR_A    | CDS  |
| O157                 | 2873289           | ns                | rec    | G2583_2651 | molR_A    | CDS  |
| O157                 | 2873291           | ns                | rec    | G2583_2651 | molR_A    | CDS  |
| O157                 | 2873292           | ns                | rec    | G2583_2651 | molR_A    | CDS  |
| O157                 | 2873296           | ns                | rec    | G2583_2651 | molR_A    | CDS  |
| O157                 | 2873299           | ns                | rec    | G2583_2651 | molR_A    | CDS  |
| O157                 | 2873301           | ns                | rec    | G2583_2651 | molR_A    | CDS  |
| O157                 | 2873303           | ns                | rec    | G2583_2651 | molR_A    | CDS  |
| O157                 | 2873304           | ns                | rec    | G2583_2651 | molR_A    | CDS  |

| lineage <sup>a</sup> | site <sup>b</sup> | mutation          |        | gene       | Gene name | Type |
|----------------------|-------------------|-------------------|--------|------------|-----------|------|
|                      |                   | type <sup>c</sup> | recomb |            |           |      |
| O157                 | 2873307           | ns                | rec    | G2583_2651 | molR_A    | CDS  |
| O157                 | 2873308           | ns                | rec    | G2583_2651 | molR_A    | CDS  |
| O157                 | 2873309           | ns                | rec    | G2583_2651 | molR_A    | CDS  |
| O157                 | 2873313           | s                 | rec    | G2583_2651 | molR_A    | CDS  |
| O157                 | 2873314           | ns                | rec    | G2583_2651 | molR_A    | CDS  |
| O157                 | 2873316           | ns                | rec    | G2583_2651 | molR_A    | CDS  |
| O157                 | 2873319           | s                 | rec    | G2583_2651 | molR_A    | CDS  |
| O157                 | 2873323           | ns                | rec    | G2583_2651 | molR_A    | CDS  |
| O157                 | 2873324           | ns                | rec    | G2583_2651 | molR_A    | CDS  |
| O157                 | 2873325           | ns                | rec    | G2583_2651 | molR_A    | CDS  |
| O157                 | 2873327           | ns                | rec    | G2583_2651 | molR_A    | CDS  |
| O157                 | 2873330           | del-3             | rec    | G2583_2651 | molR_A    | CDS  |
| O157                 | 2873332           | ns                | rec    | G2583_2651 | molR_A    | CDS  |
| O157                 | 2873333           | ns                | rec    | G2583_2651 | molR_A    | CDS  |
| O157                 | 2873335           | ns                | rec    | G2583_2651 | molR_A    | CDS  |
| O157                 | 2873337           | ns                | rec    | G2583_2651 | molR_A    | CDS  |
| O157                 | 2873338           | ns                | rec    | G2583_2651 | molR_A    | CDS  |
| O157                 | 2873344           | ns                | rec    | G2583_2651 | molR_A    | CDS  |
| O157                 | 2873411           | ns                | rec    | G2583_2651 | molR_A    | CDS  |
| O157                 | 2873415           | s                 | rec    | G2583_2651 | molR_A    | CDS  |
| O157                 | 2873445           | s                 | rec    | G2583_2651 | molR_A    | CDS  |
| O157                 | 2873449           | ns                | rec    | G2583_2651 | molR_A    | CDS  |
| O157                 | 2873451           | ns                | rec    | G2583_2651 | molR_A    | CDS  |
| O157                 | 2873457           | s                 | rec    | G2583_2651 | molR_A    | CDS  |
| O157                 | 2873478           | s                 | rec    | G2583_2651 | molR_A    | CDS  |
| O157                 | 2873509           | ns                | rec    | G2583_2651 | molR_A    | CDS  |
| O157                 | 2873514           | ns                | rec    | G2583_2651 | molR_A    | CDS  |
| O157                 | 2873547           | s                 | rec    | G2583_2651 | molR_A    | CDS  |
| O157                 | 2873571           | ns                | rec    | G2583_2651 | molR_A    | CDS  |
| O157                 | 2873595           | s                 | rec    | G2583_2651 | molR_A    | CDS  |
| O157                 | 2873627           | ns                | rec    | G2583_2651 | molR_A    | CDS  |
| O157                 | 2873629           | ns                | rec    | G2583_2651 | molR_A    | CDS  |
| O157                 | 2873634           | s                 | rec    | G2583_2651 | molR_A    | CDS  |
| O157                 | 2873685           | s                 | rec    | G2583_2651 | molR_A    | CDS  |
| O157                 | 2873686           | ns                | rec    | G2583_2651 | molR_A    | CDS  |
| O157                 | 2873688           | ns                | rec    | G2583_2651 | molR_A    | CDS  |
| O157                 | 2873691           | s                 | rec    | G2583_2651 | molR_A    | CDS  |
| O157                 | 2873694           | s                 | rec    | G2583_2651 | molR_A    | CDS  |
| O157                 | 2873698           | ns                | rec    | G2583_2651 | molR_A    | CDS  |
| O157                 | 2873700           | ns                | rec    | G2583_2651 | molR_A    | CDS  |
| O157                 | 2873702           | ns                | rec    | G2583_2651 | molR_A    | CDS  |
| O157                 | 2873703           | ns                | rec    | G2583_2651 | molR_A    | CDS  |
| O157                 | 2873706           | ns                | rec    | G2583_2651 | molR_A    | CDS  |
| O157                 | 2873707           | ns                | rec    | G2583_2651 | molR_A    | CDS  |
| O157                 | 2873718           | ns                | rec    | G2583_2651 | molR_A    | CDS  |



| lineage <sup>a</sup> | site <sup>b</sup> | mutation          |        | gene       | Gene name | Type |
|----------------------|-------------------|-------------------|--------|------------|-----------|------|
|                      |                   | type <sup>c</sup> | recomb |            |           |      |
| O157                 | 2873719           | ns                | rec    | G2583_2651 | molR_A    | CDS  |
| O157                 | 2873720           | ns                | rec    | G2583_2651 | molR_A    | CDS  |
| O157                 | 2873721           | ns                | rec    | G2583_2651 | molR_A    | CDS  |
| O157                 | 2873723           | ns                | rec    | G2583_2651 | molR_A    | CDS  |
| O157                 | 2873724           | ns                | rec    | G2583_2651 | molR_A    | CDS  |
| O157                 | 2873727           | s                 | rec    | G2583_2651 | molR_A    | CDS  |
| O157                 | 2873730           | s                 | rec    | G2583_2651 | molR_A    | CDS  |
| O157                 | 2873737           | s                 | rec    | G2583_2651 | molR_A    | CDS  |
| O157                 | 2873739           | s                 | rec    | G2583_2651 | molR_A    | CDS  |
| O157                 | 2873742           | s                 | rec    | G2583_2651 | molR_A    | CDS  |
| O157                 | 2873745           | s                 | rec    | G2583_2651 | molR_A    | CDS  |
| O157                 | 2873751           | s                 | rec    | G2583_2651 | molR_A    | CDS  |
| O157                 | 2873752           | ns                | rec    | G2583_2651 | molR_A    | CDS  |
| O157                 | 2873758           | ns                | rec    | G2583_2651 | molR_A    | CDS  |
| O157                 | 2873760           | ns                | rec    | G2583_2651 | molR_A    | CDS  |
| O157                 | 2873763           | s                 | rec    | G2583_2651 | molR_A    | CDS  |
| O157                 | 2873764           | ns                | rec    | G2583_2651 | molR_A    | CDS  |
| O157                 | 2873766           | ns                | rec    | G2583_2651 | molR_A    | CDS  |
| O157                 | 2873770           | ns                | rec    | G2583_2651 | molR_A    | CDS  |
| O157                 | 2873775           | s                 | rec    | G2583_2651 | molR_A    | CDS  |
| O157                 | 2873780           | ns                | rec    | G2583_2651 | molR_A    | CDS  |
| O157                 | 2873781           | ns                | rec    | G2583_2651 | molR_A    | CDS  |
| O157                 | 2873787           | s                 | rec    | G2583_2651 | molR_A    | CDS  |
| O157                 | 2873788           | ns                | rec    | G2583_2651 | molR_A    | CDS  |
| O157                 | 2873790           | ns                | rec    | G2583_2651 | molR_A    | CDS  |
| O157                 | 2873791           | ns                | rec    | G2583_2651 | molR_A    | CDS  |
| O157                 | 2873792           | ns                | rec    | G2583_2651 | molR_A    | CDS  |
| O157                 | 2873794           | ns                | rec    | G2583_2651 | molR_A    | CDS  |
| O157                 | 2873796           | ns                | rec    | G2583_2651 | molR_A    | CDS  |
| O157                 | 2873798           | ns                | rec    | G2583_2651 | molR_A    | CDS  |
| O157                 | 2873799           | ns                | rec    | G2583_2651 | molR_A    | CDS  |
| O157                 | 2873801           | ns                | rec    | G2583_2651 | molR_A    | CDS  |
| O157                 | 2873806           | ns                | rec    | G2583_2651 | molR_A    | CDS  |
| O157                 | 2873809           | ns                | rec    | G2583_2651 | molR_A    | CDS  |
| O157                 | 2873811           | ins-4             | rec    | G2583_2651 | molR_A    | CDS  |
| O157                 | 2873816           | ns                | rec    | G2583_2651 | molR_A    | CDS  |
| O157                 | 2873820           | ns                | rec    | G2583_2651 | molR_A    | CDS  |
| O157                 | 2873821           | ns                | rec    | G2583_2651 | molR_A    | CDS  |
| O157                 | 2873823           | ns                | rec    | G2583_2651 | molR_A    | CDS  |
| O157                 | 2873827           | s                 | rec    | G2583_2651 | molR_A    | CDS  |
| O157                 | 2873827           | del               | rec    | G2583_2651 | molR_A    | CDS  |
| O157                 | 2873832           | s                 | rec    | G2583_2651 | molR_A    | CDS  |
| O157                 | 2873835           | s                 | rec    | G2583_2651 | molR_A    | CDS  |
| O157                 | 2873839           | ns                | rec    | G2583_2651 | molR_A    | CDS  |
| O157                 | 2873841           | ns                | rec    | G2583_2651 | molR_A    | CDS  |

| lineage <sup>a</sup> | site <sup>b</sup> | mutation          |        | gene       | Gene name | Type |
|----------------------|-------------------|-------------------|--------|------------|-----------|------|
|                      |                   | type <sup>c</sup> | recomb |            |           |      |
| O157                 | 2873847           | s                 | rec    | G2583_2651 | molR_A    | CDS  |
| O157                 | 2873848           | ns                | rec    | G2583_2651 | molR_A    | CDS  |
| O157                 | 2873851           | ns                | rec    | G2583_2651 | molR_A    | CDS  |
| O157                 | 2873853           | ns                | rec    | G2583_2651 | molR_A    | CDS  |
| O157                 | 2873859           | s                 | rec    | G2583_2651 | molR_A    | CDS  |
| O157                 | 2873862           | s                 | rec    | G2583_2651 | molR_A    | CDS  |
| O157                 | 2873871           | s                 | rec    | G2583_2651 | molR_A    | CDS  |
| O157                 | 2873877           | s                 | rec    | G2583_2651 | molR_A    | CDS  |
| O157                 | 2873879           | ns                | rec    | G2583_2651 | molR_A    | CDS  |
| O157                 | 2873880           | ns                | rec    | G2583_2651 | molR_A    | CDS  |
| O157                 | 2873883           | s                 | rec    | G2583_2651 | molR_A    | CDS  |
| O157                 | 2873884           | ns                | rec    | G2583_2651 | molR_A    | CDS  |
| O157                 | 2873891           | ns                | rec    | G2583_2651 | molR_A    | CDS  |
| O157                 | 2873903           | ns                | rec    | G2583_2651 | molR_A    | CDS  |
| O157                 | 2873905           | ns                | rec    | G2583_2651 | molR_A    | CDS  |
| O157                 | 2873906           | ns                | rec    | G2583_2651 | molR_A    | CDS  |
| O157                 | 2873907           | ns                | rec    | G2583_2651 | molR_A    | CDS  |
| O157                 | 2873910           | ns                | rec    | G2583_2651 | molR_A    | CDS  |
| O157                 | 2873913           | s                 | rec    | G2583_2651 | molR_A    | CDS  |
| O157                 | 2873916           | s                 | rec    | G2583_2651 | molR_A    | CDS  |
| O157                 | 2873917           | ns                | rec    | G2583_2651 | molR_A    | CDS  |
| O157                 | 2873925           | s                 | rec    | G2583_2651 | molR_A    | CDS  |
| O157                 | 2873928           | s                 | rec    | G2583_2651 | molR_A    | CDS  |
| O157                 | 2873937           | s                 | rec    | G2583_2651 | molR_A    | CDS  |
| O157                 | 2873940           | s                 | rec    | G2583_2651 | molR_A    | CDS  |
| O157                 | 2873946           | ns                | rec    | G2583_2651 | molR_A    | CDS  |
| O157                 | 2873947           | s                 | rec    | G2583_2651 | molR_A    | CDS  |
| O157                 | 2873949           | s                 | rec    | G2583_2651 | molR_A    | CDS  |
| O157                 | 2873956           | ns                | rec    | G2583_2651 | molR_A    | CDS  |
| O157                 | 2873958           | ns                | rec    | G2583_2651 | molR_A    | CDS  |
| O157                 | 2873959           | ns                | rec    | G2583_2651 | molR_A    | CDS  |
| O157                 | 2873966           | ns                | rec    | G2583_2651 | molR_A    | CDS  |
| O157                 | 2873968           | ns                | rec    | G2583_2651 | molR_A    | CDS  |
| O157                 | 2873970           | ns                | rec    | G2583_2651 | molR_A    | CDS  |
| O157                 | 2873971           | ns                | rec    | G2583_2651 | molR_A    | CDS  |
| O157                 | 2873975           | ns                | rec    | G2583_2651 | molR_A    | CDS  |
| O157                 | 2873977           | ns                | rec    | G2583_2651 | molR_A    | CDS  |
| O157                 | 2873979           | ns                | rec    | G2583_2651 | molR_A    | CDS  |
| O157                 | 2873980           | ns                | rec    | G2583_2651 | molR_A    | CDS  |
| O157                 | 2873982           | ns                | rec    | G2583_2651 | molR_A    | CDS  |
| O157                 | 2873983           | ns                | rec    | G2583_2651 | molR_A    | CDS  |
| O157                 | 2873986           | ns                | rec    | G2583_2651 | molR_A    | CDS  |
| O157                 | 2873988           | ns                | rec    | G2583_2651 | molR_A    | CDS  |
| O157                 | 2873996           | ns                | rec    | G2583_2651 | molR_A    | CDS  |
| O157                 | 2873997           | ns                | rec    | G2583_2651 | molR_A    | CDS  |

| lineage <sup>a</sup> | site <sup>b</sup> | mutation          |        | gene       | Gene name | Type |
|----------------------|-------------------|-------------------|--------|------------|-----------|------|
|                      |                   | type <sup>c</sup> | recomb |            |           |      |
| O157                 | 2873998           | ns                | rec    | G2583_2651 | molR_A    | CDS  |
| O157                 | 2873999           | ns                | rec    | G2583_2651 | molR_A    | CDS  |
| O157                 | 2874000           | ns                | rec    | G2583_2651 | molR_A    | CDS  |
| O157                 | 2874001           | ns                | rec    | G2583_2651 | molR_A    | CDS  |
| O157                 | 2874002           | ns                | rec    | G2583_2651 | molR_A    | CDS  |
| O157                 | 2874003           | ns                | rec    | G2583_2651 | molR_A    | CDS  |
| O157                 | 2874006           | s                 | rec    | G2583_2651 | molR_A    | CDS  |
| O157                 | 2874015           | s                 | rec    | G2583_2651 | molR_A    | CDS  |
| O157                 | 2874025           | s                 | rec    | G2583_2651 | molR_A    | CDS  |
| O157                 | 2874028           | s                 | rec    | G2583_2651 | molR_A    | CDS  |
| O157                 | 2874036           | s                 | rec    | G2583_2651 | molR_A    | CDS  |
| O157                 | 2874051           | s                 | rec    | G2583_2651 | molR_A    | CDS  |
| O157                 | 2874054           | ns                | rec    | G2583_2651 | molR_A    | CDS  |
| O157                 | 2874060           | s                 | rec    | G2583_2651 | molR_A    | CDS  |
| O157                 | 2874065           | ns                | rec    | G2583_2651 | molR_A    | CDS  |
| O157                 | 2874067           | ns                | rec    | G2583_2651 | molR_A    | CDS  |
| O157                 | 2874069           | ns                | rec    | G2583_2651 | molR_A    | CDS  |
| O157                 | 2874075           | s                 | rec    | G2583_2651 | molR_A    | CDS  |
| O157                 | 2874084           | s                 | rec    | G2583_2651 | molR_A    | CDS  |
| O157                 | 2874085           | ns                | rec    | G2583_2651 | molR_A    | CDS  |
| O157                 | 2874102           | s                 | rec    | G2583_2651 | molR_A    | CDS  |
| O157                 | 2874103           | ns                | rec    | G2583_2651 | molR_A    | CDS  |
| O157                 | 2874104           | ns                | rec    | G2583_2651 | molR_A    | CDS  |
| O157                 | 2874108           | s                 | rec    | G2583_2651 | molR_A    | CDS  |
| O157                 | 2874111           | s                 | rec    | G2583_2651 | molR_A    | CDS  |
| O157                 | 2874118           | s                 | rec    | G2583_2651 | molR_A    | CDS  |
| O157                 | 2874120           | s                 | rec    | G2583_2651 | molR_A    | CDS  |
| O157                 | 2874123           | s                 | rec    | G2583_2651 | molR_A    | CDS  |
| O157                 | 2874126           | s                 | rec    | G2583_2651 | molR_A    | CDS  |
| O157                 | 2874135           | s                 | rec    | G2583_2651 | molR_A    | CDS  |
| O157                 | 2874141           | s                 | rec    | G2583_2651 | molR_A    | CDS  |
| O157                 | 2874147           | s                 | rec    | G2583_2651 | molR_A    | CDS  |
| O157                 | 2874153           | s                 | rec    | G2583_2651 | molR_A    | CDS  |
| O157                 | 2874157           | ns                | rec    | G2583_2651 | molR_A    | CDS  |
| O157                 | 2874161           | ns                | rec    | G2583_2651 | molR_A    | CDS  |
| O157                 | 2874162           | ns                | rec    | G2583_2651 | molR_A    | CDS  |
| O157                 | 2874165           | s                 | rec    | G2583_2651 | molR_A    | CDS  |
| O157                 | 2874168           | ns                | rec    | G2583_2651 | molR_A    | CDS  |
| O157                 | 2874169           | ns                | rec    | G2583_2651 | molR_A    | CDS  |
| O157                 | 2874170           | ns                | rec    | G2583_2651 | molR_A    | CDS  |
| O157                 | 2874171           | ns                | rec    | G2583_2651 | molR_A    | CDS  |
| O157                 | 2874174           | s                 | rec    | G2583_2651 | molR_A    | CDS  |
| O157                 | 2874177           | s                 | rec    | G2583_2651 | molR_A    | CDS  |
| O157                 | 2874184           | ns                | rec    | G2583_2651 | molR_A    | CDS  |
| O157                 | 2874185           | ns                | rec    | G2583_2651 | molR_A    | CDS  |

| lineage <sup>a</sup> | site <sup>b</sup> | mutation          |        | gene       | Gene name | Type |
|----------------------|-------------------|-------------------|--------|------------|-----------|------|
|                      |                   | type <sup>c</sup> | recomb |            |           |      |
| O157                 | 2874187           | ns                | rec    | G2583_2651 | molR_A    | CDS  |
| O157                 | 2874189           | ns                | rec    | G2583_2651 | molR_A    | CDS  |
| O157                 | 2874198           | s                 | rec    | G2583_2651 | molR_A    | CDS  |
| O157                 | 2874199           | ns                | rec    | G2583_2651 | molR_A    | CDS  |
| O157                 | 2874210           | s                 | rec    | G2583_2651 | molR_A    | CDS  |
| O157                 | 2874211           | ns                | rec    | G2583_2651 | molR_A    | CDS  |
| O157                 | 2874213           | ns                | rec    | G2583_2651 | molR_A    | CDS  |
| O157                 | 2874219           | s                 | rec    | G2583_2651 | molR_A    | CDS  |
| O157                 | 2874225           | s                 | rec    | G2583_2651 | molR_A    | CDS  |
| O157                 | 2874232           | ns                | rec    | G2583_2651 | molR_A    | CDS  |
| O157                 | 2874238           | s                 | rec    | G2583_2651 | molR_A    | CDS  |
| O157                 | 2874246           | s                 | rec    | G2583_2651 | molR_A    | CDS  |
| O157                 | 2874251           | ns                | rec    | G2583_2651 | molR_A    | CDS  |
| O157                 | 2874252           | ns                | rec    | G2583_2651 | molR_A    | CDS  |
| O157                 | 2874254           | ns                | rec    | G2583_2651 | molR_A    | CDS  |
| O157                 | 2874258           | s                 | rec    | G2583_2651 | molR_A    | CDS  |
| O157                 | 2874264           | ns                | rec    | G2583_2651 | molR_A    | CDS  |
| O157                 | 2874265           | ns                | rec    | G2583_2651 | molR_A    | CDS  |
| O157                 | 2874267           | ns                | rec    | G2583_2651 | molR_A    | CDS  |
| O157                 | 2874271           | ns                | rec    | G2583_2651 | molR_A    | CDS  |
| O157                 | 2874274           | ns                | rec    | G2583_2651 | molR_A    | CDS  |
| O157                 | 2874279           | s                 | rec    | G2583_2651 | molR_A    | CDS  |
| O157                 | 2874280           | ns                | rec    | G2583_2651 | molR_A    | CDS  |
| O157                 | 2874282           | ns                | rec    | G2583_2651 | molR_A    | CDS  |
| O157                 | 2874285           | s                 | rec    | G2583_2651 | molR_A    | CDS  |
| O157                 | 2874287           | ns                | rec    | G2583_2651 | molR_A    | CDS  |
| O157                 | 2874297           | s                 | rec    | G2583_2651 | molR_A    | CDS  |
| O157                 | 2874306           | s                 | rec    | G2583_2651 | molR_A    | CDS  |
| O157                 | 2874315           | s                 | rec    | G2583_2651 | molR_A    | CDS  |
| O157                 | 2874317           | ns                | rec    | G2583_2651 | molR_A    | CDS  |
| O157                 | 2874318           | ns                | rec    | G2583_2651 | molR_A    | CDS  |
| O157                 | 2874333           | ns                | rec    | G2583_2651 | molR_A    | CDS  |
| O157                 | 2874334           | ns                | rec    | G2583_2651 | molR_A    | CDS  |
| O157                 | 2874339           | s                 | rec    | G2583_2651 | molR_A    | CDS  |
| O157                 | 2874340           | ns                | rec    | G2583_2651 | molR_A    | CDS  |
| O157                 | 2874342           | ns                | rec    | G2583_2651 | molR_A    | CDS  |
| O157                 | 2874348           | s                 | rec    | G2583_2651 | molR_A    | CDS  |
| O157                 | 2874349           | ns                | rec    | G2583_2651 | molR_A    | CDS  |
| O157                 | 2874350           | ns                | rec    | G2583_2651 | molR_A    | CDS  |
| O157                 | 2874351           | ns                | rec    | G2583_2651 | molR_A    | CDS  |
| O157                 | 2874354           | s                 | rec    | G2583_2651 | molR_A    | CDS  |
| O157                 | 2874360           | s                 | rec    | G2583_2651 | molR_A    | CDS  |
| O157                 | 2874361           | ns                | rec    | G2583_2651 | molR_A    | CDS  |
| O157                 | 2874363           | ns                | rec    | G2583_2651 | molR_A    | CDS  |
| O157                 | 2874364           | ns                | rec    | G2583_2651 | molR_A    | CDS  |

| lineage <sup>a</sup> | site <sup>b</sup> | mutation          |        | gene       | Gene name | Type       |
|----------------------|-------------------|-------------------|--------|------------|-----------|------------|
|                      |                   | type <sup>c</sup> | recomb |            |           |            |
| O157                 | 2874367           | ns                | rec    | G2583_2651 | molR_A    | CDS        |
| O157                 | 2874369           | ns                | rec    | G2583_2651 | molR_A    | CDS        |
| O157                 | 2874372           | s                 | rec    | G2583_2651 | molR_A    | CDS        |
| O157                 | 2874393           | s                 | rec    | G2583_2651 | molR_A    | CDS        |
| O157                 | 2874396           | s                 | rec    | G2583_2651 | molR_A    | CDS        |
| O157                 | 2874400           | ns                | rec    | G2583_2651 | molR_A    | CDS        |
| O157                 | 2874405           | s                 | rec    | G2583_2651 | molR_A    | CDS        |
| O157                 | 2874415           | ns                | rec    | G2583_2651 | molR_A    | CDS        |
| O157                 | 2874416           | ns                | rec    | G2583_2651 | molR_A    | CDS        |
| O157                 | 2874417           | ns                | rec    | G2583_2651 | molR_A    | CDS        |
| O157                 | 2874418           | ns                | rec    | G2583_2651 | molR_A    | CDS        |
| O157                 | 2874420           | ns                | rec    | G2583_2651 | molR_A    | CDS        |
| O157                 | 2874421           | ns                | rec    | G2583_2651 | molR_A    | CDS        |
| O157                 | 2874424           | ns                | rec    | G2583_2651 | molR_A    | CDS        |
| O157                 | 2874429           | s                 | rec    | G2583_2651 | molR_A    | CDS        |
| O157                 | 2874432           | ns                | rec    | G2583_2651 | molR_A    | CDS        |
| O157                 | 2874434           | ns                | rec    | G2583_2651 | molR_A    | CDS        |
| O157                 | 2874447           | s                 | rec    | G2583_2651 | molR_A    | CDS        |
| O157                 | 2874450           | s                 | rec    | G2583_2651 | molR_A    | CDS        |
| O157                 | 2874452           | ns                | rec    | G2583_2651 | molR_A    | CDS        |
| O157                 | 2874453           | ns                | rec    | G2583_2651 | molR_A    | CDS        |
| O157                 | 2874459           | s                 | rec    | G2583_2651 | molR_A    | CDS        |
| O157                 | 2874465           | ns                | rec    | G2583_2651 | molR_A    | CDS        |
| O157                 | 2874498           | s                 | rec    | G2583_2651 | molR_A    | CDS        |
| O157                 | 2874502           | ns                | rec    | G2583_2651 | molR_A    | CDS        |
| O157                 | 2874543           | nc                | rec    | G2583_2652 | molR_B    | pseudogene |
| O157                 | 2874546           | nc                | rec    | G2583_2652 | molR_B    | pseudogene |
| O157                 | 2874573           | nc                | rec    | G2583_2652 | molR_B    | pseudogene |
| O157                 | 2874576           | nc                | rec    | G2583_2652 | molR_B    | pseudogene |
| O157                 | 2874610           | nc                | rec    | G2583_2652 | molR_B    | pseudogene |
| O157                 | 2874615           | nc                | rec    | G2583_2652 | molR_B    | pseudogene |
| O157                 | 2874627           | nc                | rec    | G2583_2652 | molR_B    | pseudogene |
| O157                 | 2874655           | nc                | rec    | G2583_2652 | molR_B    | pseudogene |
| O157                 | 2874684           | nc                | rec    | G2583_2652 | molR_B    | pseudogene |
| O157                 | 2874688           | nc                | rec    | G2583_2652 | molR_B    | pseudogene |
| O157                 | 2874699           | nc                | rec    | G2583_2652 | molR_B    | pseudogene |
| O157                 | 2874712           | nc                | rec    | G2583_2652 | molR_B    | pseudogene |
| O157                 | 2874728           | nc                | rec    | G2583_2652 | molR_B    | pseudogene |
| O157                 | 2874729           | nc                | rec    | G2583_2652 | molR_B    | pseudogene |
| O157                 | 2874735           | nc                | rec    | G2583_2652 | molR_B    | pseudogene |
| O157                 | 2874737           | nc                | rec    | G2583_2652 | molR_B    | pseudogene |
| O157                 | 2874741           | nc                | rec    | G2583_2652 | molR_B    | pseudogene |
| O157                 | 2874743           | nc                | rec    | G2583_2652 | molR_B    | pseudogene |
| O157                 | 2874768           | nc                | rec    | G2583_2652 | molR_B    | pseudogene |
| O157                 | 2874783           | nc                | rec    | G2583_2652 | molR_B    | pseudogene |

| lineage <sup>a</sup> | site <sup>b</sup> | mutation          |        | gene       | Gene name | Type       |
|----------------------|-------------------|-------------------|--------|------------|-----------|------------|
|                      |                   | type <sup>c</sup> | recomb |            |           |            |
| O157                 | 2874786           | nc                | rec    | G2583_2652 | molR_B    | pseudogene |
| O157                 | 2874787           | nc                | rec    | G2583_2652 | molR_B    | pseudogene |
| O157                 | 2874789           | nc                | rec    | G2583_2652 | molR_B    | pseudogene |
| O157                 | 2874792           | nc                | rec    | G2583_2652 | molR_B    | pseudogene |
| O157                 | 2874804           | nc                | rec    | G2583_2652 | molR_B    | pseudogene |
| O157                 | 2874822           | nc                | rec    | G2583_2652 | molR_B    | pseudogene |
| O157                 | 2874837           | nc                | rec    | G2583_2652 | molR_B    | pseudogene |
| O157                 | 2874843           | nc                | rec    | G2583_2652 | molR_B    | pseudogene |
| O157                 | 2874850           | nc                | rec    | G2583_2652 | molR_B    | pseudogene |
| O157                 | 2874862           | nc                | rec    | G2583_2652 | molR_B    | pseudogene |
| O157                 | 2874877           | nc                | rec    | G2583_2652 | molR_B    | pseudogene |
| O157                 | 2874888           | nc                | rec    | G2583_2652 | molR_B    | pseudogene |
| O157                 | 2874903           | nc                | rec    | G2583_2652 | molR_B    | pseudogene |
| O157                 | 2874906           | nc                | rec    | G2583_2652 | molR_B    | pseudogene |
| O157                 | 2874924           | nc                | rec    | G2583_2652 | molR_B    | pseudogene |
| O157                 | 2874930           | nc                | rec    | G2583_2652 | molR_B    | pseudogene |
| O157                 | 2874932           | nc                | rec    | G2583_2652 | molR_B    | pseudogene |
| O157                 | 2874945           | nc                | rec    | G2583_2652 | molR_B    | pseudogene |
| O157                 | 2874951           | nc                | rec    | G2583_2652 | molR_B    | pseudogene |
| O157                 | 2874952           | nc                | rec    | G2583_2652 | molR_B    | pseudogene |
| O157                 | 2874953           | nc                | rec    | G2583_2652 | molR_B    | pseudogene |
| O157                 | 2874957           | nc                | rec    | G2583_2652 | molR_B    | pseudogene |
| O157                 | 2874960           | nc                | rec    | G2583_2652 | molR_B    | pseudogene |
| O157                 | 2874966           | nc                | rec    | G2583_2652 | molR_B    | pseudogene |
| O157                 | 2874967           | nc                | rec    | G2583_2652 | molR_B    | pseudogene |
| O157                 | 2874975           | nc                | rec    | G2583_2652 | molR_B    | pseudogene |
| O157                 | 2874979           | nc                | rec    | G2583_2652 | molR_B    | pseudogene |
| O157                 | 2874993           | nc                | rec    | G2583_2652 | molR_B    | pseudogene |
| O157                 | 2874998           | nc                | rec    | G2583_2652 | molR_B    | pseudogene |
| O157                 | 2875002           | nc                | rec    | G2583_2652 | molR_B    | pseudogene |
| O157                 | 2875012           | nc                | rec    | G2583_2652 | molR_B    | pseudogene |
| O157                 | 2875013           | nc                | rec    | G2583_2652 | molR_B    | pseudogene |
| O157                 | 2875014           | nc                | rec    | G2583_2652 | molR_B    | pseudogene |
| O157                 | 2875033           | nc                | rec    | G2583_2652 | molR_B    | pseudogene |
| O157                 | 2875038           | nc                | rec    | G2583_2652 | molR_B    | pseudogene |
| O157                 | 2875040           | nc                | rec    | G2583_2652 | molR_B    | pseudogene |
| O157                 | 2875047           | nc                | rec    | G2583_2652 | molR_B    | pseudogene |
| O157                 | 2875050           | nc                | rec    | G2583_2652 | molR_B    | pseudogene |
| O157                 | 2875053           | nc                | rec    | G2583_2652 | molR_B    | pseudogene |
| O157                 | 2875056           | nc                | rec    | G2583_2652 | molR_B    | pseudogene |
| O157                 | 2875062           | nc                | rec    | G2583_2652 | molR_B    | pseudogene |
| O157                 | 2875065           | nc                | rec    | G2583_2652 | molR_B    | pseudogene |
| O157                 | 2875068           | nc                | rec    | G2583_2652 | molR_B    | pseudogene |
| O157                 | 2875074           | nc                | rec    | G2583_2652 | molR_B    | pseudogene |
| O157                 | 2875080           | nc                | rec    | G2583_2652 | molR_B    | pseudogene |

| lineage <sup>a</sup> | site <sup>b</sup> | mutation          |        | gene       | Gene name | Type       |
|----------------------|-------------------|-------------------|--------|------------|-----------|------------|
|                      |                   | type <sup>c</sup> | recomb |            |           |            |
| O157                 | 2875092           | nc                | rec    | G2583_2652 | molR_B    | pseudogene |
| O157                 | 2875101           | nc                | rec    | G2583_2652 | molR_B    | pseudogene |
| O157                 | 2875104           | nc                | rec    | G2583_2652 | molR_B    | pseudogene |
| O157                 | 2875254           | nc                | rec    | G2583_2652 | molR_B    | pseudogene |
| O157                 | 2875260           | nc                | rec    | G2583_2652 | molR_B    | pseudogene |
| O157                 | 2875262           | nc                | rec    | G2583_2652 | molR_B    | pseudogene |
| O157                 | 2875275           | nc                | rec    | G2583_2652 | molR_B    | pseudogene |
| O157                 | 2875308           | nc                | rec    | G2583_2652 | molR_B    | pseudogene |
| O157                 | 2875311           | nc                | rec    | G2583_2652 | molR_B    | pseudogene |
| O157                 | 2875314           | nc                | rec    | G2583_2652 | molR_B    | pseudogene |
| O157                 | 2875317           | nc                | rec    | G2583_2652 | molR_B    | pseudogene |
| O157                 | 2875329           | nc                | rec    | G2583_2652 | molR_B    | pseudogene |
| O157                 | 2875333           | nc                | rec    | G2583_2652 | molR_B    | pseudogene |
| O157                 | 2875334           | nc                | rec    | G2583_2652 | molR_B    | pseudogene |
| O157                 | 2875335           | nc                | rec    | G2583_2652 | molR_B    | pseudogene |
| O157                 | 2875557           | nc                | rec    | G2583_2652 | molR_B    | pseudogene |
| O157                 | 2875575           | nc                | rec    | G2583_2652 | molR_B    | pseudogene |
| O157                 | 2875576           | nc                | rec    | G2583_2652 | molR_B    | pseudogene |
| O157                 | 2875613           | nc                | rec    | G2583_2652 | molR_B    | pseudogene |
| O157                 | 2875650           | nc                | rec    | G2583_2652 | molR_B    | pseudogene |
| O157                 | 2875653           | nc                | rec    | G2583_2652 | molR_B    | pseudogene |
| O157                 | 2875659           | nc                | rec    | G2583_2652 | molR_B    | pseudogene |
| O157                 | 2875662           | nc                | rec    | G2583_2652 | molR_B    | pseudogene |
| O157                 | 2875677           | nc                | rec    | G2583_2652 | molR_B    | pseudogene |
| O157                 | 2875687           | nc                | rec    | G2583_2652 | molR_B    | pseudogene |
| O157                 | 2875688           | nc                | rec    | G2583_2652 | molR_B    | pseudogene |
| O157                 | 2875689           | nc                | rec    | G2583_2652 | molR_B    | pseudogene |
| O157                 | 2875692           | nc                | rec    | G2583_2652 | molR_B    | pseudogene |
| O157                 | 2875696           | nc                | rec    | G2583_2652 | molR_B    | pseudogene |
| O157                 | 2875699           | nc                | rec    | G2583_2652 | molR_B    | pseudogene |
| O157                 | 2875708           | nc                | rec    | G2583_2652 | molR_B    | pseudogene |
| O157                 | 2875710           | nc                | rec    | G2583_2652 | molR_B    | pseudogene |
| O157                 | 2875716           | nc                | rec    | G2583_2652 | molR_B    | pseudogene |
| O157                 | 2875719           | nc                | rec    | G2583_2652 | molR_B    | pseudogene |
| O157                 | 2875788           | nc                | rec    | G2583_2652 | molR_B    | pseudogene |
| O157                 | 2875793           | nc                | rec    | G2583_2652 | molR_B    | pseudogene |
| O157                 | 2875804           | nc                | rec    | G2583_2652 | molR_B    | pseudogene |
| O157                 | 2875806           | nc                | rec    | G2583_2652 | molR_B    | pseudogene |
| O157                 | 2875813           | nc                | rec    | G2583_2652 | molR_B    | pseudogene |
| O157                 | 2875818           | nc                | rec    | G2583_2652 | molR_B    | pseudogene |
| O157                 | 2875820           | nc                | rec    | G2583_2652 | molR_B    | pseudogene |
| O157                 | 2875836           | nc                | rec    | G2583_2652 | molR_B    | pseudogene |
| O157                 | 2875860           | nc                | rec    | G2583_2652 | molR_B    | pseudogene |
| O157                 | 2875873           | nc                | rec    | G2583_2652 | molR_B    | pseudogene |
| O157                 | 2875880           | nc                | rec    | G2583_2652 | molR_B    | pseudogene |

| lineage <sup>a</sup> | site <sup>b</sup> | mutation          |        | gene       | Gene name | Type       |
|----------------------|-------------------|-------------------|--------|------------|-----------|------------|
|                      |                   | type <sup>c</sup> | recomb |            |           |            |
| O157                 | 2875883           | nc                | rec    | G2583_2652 | molR_B    | pseudogene |
| O157                 | 2875884           | nc                | rec    | G2583_2652 | molR_B    | pseudogene |
| O157                 | 2875887           | nc                | rec    | G2583_2652 | molR_B    | pseudogene |
| O157                 | 2875890           | nc                | rec    | G2583_2652 | molR_B    | pseudogene |
| O157                 | 2875909           | nc                | rec    | G2583_2652 | molR_B    | pseudogene |
| O157                 | 2875911           | nc                | rec    | G2583_2652 | molR_B    | pseudogene |
| O157                 | 2875914           | nc                | rec    | G2583_2652 | molR_B    | pseudogene |
| O157                 | 2875915           | nc                | rec    | G2583_2652 | molR_B    | pseudogene |
| O157                 | 2875926           | nc                | rec    | G2583_2652 | molR_B    | pseudogene |
| O157                 | 2875943           | nc                | rec    | G2583_2652 | molR_B    | pseudogene |
| O157                 | 2875954           | nc                | rec    | G2583_2652 | molR_B    | pseudogene |
| O157                 | 2876023           | i                 | rec    | intergenic |           |            |
| O157                 | 2876086           | ns                | rec    | G2583_2653 | molR_C    | CDS        |
| O157                 | 2876095           | ns                | rec    | G2583_2653 | molR_C    | CDS        |
| O157                 | 2876103           | s                 | rec    | G2583_2653 | molR_C    | CDS        |
| O157                 | 2876112           | s                 | rec    | G2583_2653 | molR_C    | CDS        |
| O157                 | 2876121           | s                 | rec    | G2583_2653 | molR_C    | CDS        |
| O157                 | 2876124           | s                 | rec    | G2583_2653 | molR_C    | CDS        |
| O157                 | 2876154           | s                 | rec    | G2583_2653 | molR_C    | CDS        |
| O157                 | 2876158           | ns                | rec    | G2583_2653 | molR_C    | CDS        |
| O157                 | 2876169           | s                 | rec    | G2583_2653 | molR_C    | CDS        |
| O157                 | 2876178           | s                 | rec    | G2583_2653 | molR_C    | CDS        |
| O157                 | 2876180           | ns                | rec    | G2583_2653 | molR_C    | CDS        |
| O157                 | 2876255           | ns                | rec    | G2583_2653 | molR_C    | CDS        |
| O157                 | 2876303           | ns                | rec    | G2583_2653 | molR_C    | CDS        |
| O157                 | 2876348           | ns                | rec    | G2583_2653 | molR_C    | CDS        |
| O157                 | 2877138           | s                 | rec    | G2583_2653 | molR_C    | CDS        |
| O157                 | 2877166           | ns                | rec    | G2583_2653 | molR_C    | CDS        |
| O157                 | 2877169           | ns                | rec    | G2583_2653 | molR_C    | CDS        |
| O157                 | 2877265           | s                 | rec    | G2583_2653 | molR_C    | CDS        |
| O157                 | 2877273           | ns                | rec    | G2583_2653 | molR_C    | CDS        |
| O157                 | 2877322           | s                 | rec    | G2583_2653 | molR_C    | CDS        |
| O157                 | 2877358           | ns                | rec    | G2583_2653 | molR_C    | CDS        |
| O157                 | 2877595           | s                 | rec    | G2583_2653 | molR_C    | CDS        |
| O157                 | 2877630           | ns                | rec    | G2583_2653 | molR_C    | CDS        |
| O157                 | 2877634           | s                 | rec    | G2583_2653 | molR_C    | CDS        |
| O157                 | 2877639           | ns                | rec    | G2583_2653 | molR_C    | CDS        |
| O157                 | 2877640           | ns                | rec    | G2583_2653 | molR_C    | CDS        |
| O157                 | 2877679           | s                 | rec    | G2583_2653 | molR_C    | CDS        |
| O157                 | 2877770           | ns                | rec    | G2583_2653 | molR_C    | CDS        |
| O157                 | 2877775           | s                 | rec    | G2583_2653 | molR_C    | CDS        |
| O157                 | 2877781           | s                 | rec    | G2583_2653 | molR_C    | CDS        |
| O157                 | 2877790           | s                 | rec    | G2583_2653 | molR_C    | CDS        |
| O157                 | 2877793           | s                 | rec    | G2583_2653 | molR_C    | CDS        |
| O157                 | 2877814           | s                 | rec    | G2583_2653 | molR_C    | CDS        |



| lineage <sup>a</sup> | site <sup>b</sup> | mutation          |        | gene       | Gene name | Type |
|----------------------|-------------------|-------------------|--------|------------|-----------|------|
|                      |                   | type <sup>c</sup> | recomb |            |           |      |
| O157                 | 2877820           | s                 | rec    | G2583_2653 | molR_C    | CDS  |
| O157                 | 2877829           | s                 | rec    | G2583_2653 | molR_C    | CDS  |
| O157                 | 2877838           | s                 | rec    | G2583_2653 | molR_C    | CDS  |
| O157                 | 2877874           | s                 | rec    | G2583_2653 | molR_C    | CDS  |
| O157                 | 2877880           | s                 | rec    | G2583_2653 | molR_C    | CDS  |
| O157                 | 2877940           | s                 | rec    | G2583_2653 | molR_C    | CDS  |
| O157                 | 2877958           | s                 | rec    | G2583_2653 | molR_C    | CDS  |
| O157                 | 2877964           | s                 | rec    | G2583_2653 | molR_C    | CDS  |
| O157                 | 2877985           | s                 | rec    | G2583_2653 | molR_C    | CDS  |
| O157                 | 2878000           | s                 | rec    | G2583_2653 | molR_C    | CDS  |
| O157                 | 2878006           | ns                | rec    | G2583_2653 | molR_C    | CDS  |
| O157                 | 2878017           | ns                | rec    | G2583_2653 | molR_C    | CDS  |
| O157                 | 2878024           | s                 | rec    | G2583_2653 | molR_C    | CDS  |
| O157                 | 2878030           | s                 | rec    | G2583_2653 | molR_C    | CDS  |
| O157                 | 2878039           | s                 | rec    | G2583_2653 | molR_C    | CDS  |
| O157                 | 2878042           | s                 | rec    | G2583_2653 | molR_C    | CDS  |
| O157                 | 2878047           | ns                | rec    | G2583_2653 | molR_C    | CDS  |
| O157                 | 2878048           | ns                | rec    | G2583_2653 | molR_C    | CDS  |
| O157                 | 2878079           | ns                | rec    | G2583_2653 | molR_C    | CDS  |
| O157                 | 2878118           | ns                | rec    | G2583_2653 | molR_C    | CDS  |
| O157                 | 2878158           | ns                | rec    | G2583_2653 | molR_C    | CDS  |
| O157                 | 2878171           | s                 | rec    | G2583_2653 | molR_C    | CDS  |
| O157                 | 2878173           | ns                | rec    | G2583_2653 | molR_C    | CDS  |
| O157                 | 2878177           | s                 | rec    | G2583_2653 | molR_C    | CDS  |
| O157                 | 2878261           | s                 | rec    | G2583_2653 | molR_C    | CDS  |
| O157                 | 2878565           | ns                | rec    | G2583_2653 | molR_C    | CDS  |
| O157                 | 2878979           | ns                | rec    | G2583_2653 | molR_C    | CDS  |
| O157                 | 2879644           | s                 | rec    | G2583_2654 | yehI      | CDS  |
| O157                 | 2879810           | ns                | rec    | G2583_2654 | yehI      | CDS  |
| O157                 | 2879817           | ns                | rec    | G2583_2654 | yehI      | CDS  |
| O157                 | 2879840           | ns                | rec    | G2583_2654 | yehI      | CDS  |
| O157                 | 2879852           | ns                | rec    | G2583_2654 | yehI      | CDS  |
| O157                 | 2879870           | ns                | rec    | G2583_2654 | yehI      | CDS  |
| O157                 | 2879881           | s                 | rec    | G2583_2654 | yehI      | CDS  |
| O157                 | 2879884           | s                 | rec    | G2583_2654 | yehI      | CDS  |
| O157                 | 2879893           | s                 | rec    | G2583_2654 | yehI      | CDS  |
| O157                 | 2879918           | s                 | rec    | G2583_2654 | yehI      | CDS  |
| O157                 | 2879941           | s                 | rec    | G2583_2654 | yehI      | CDS  |
| O157                 | 2879949           | ns                | rec    | G2583_2654 | yehI      | CDS  |
| O157                 | 2879959           | s                 | rec    | G2583_2654 | yehI      | CDS  |
| O157                 | 2879960           | s                 | rec    | G2583_2654 | yehI      | CDS  |
| O157                 | 2879962           | s                 | rec    | G2583_2654 | yehI      | CDS  |
| O157                 | 2879965           | s                 | rec    | G2583_2654 | yehI      | CDS  |
| O157                 | 2880025           | s                 | rec    | G2583_2654 | yehI      | CDS  |
| O157                 | 2880037           | s                 | rec    | G2583_2654 | yehI      | CDS  |

| lineage <sup>a</sup> | site <sup>b</sup> | mutation          |        | gene       | Gene name | Type |
|----------------------|-------------------|-------------------|--------|------------|-----------|------|
|                      |                   | type <sup>c</sup> | recomb |            |           |      |
| O157                 | 2880118           | s                 | rec    | G2583_2654 | yehl      | CDS  |
| O157                 | 2880130           | s                 | rec    | G2583_2654 | yehl      | CDS  |
| O157                 | 2880133           | s                 | rec    | G2583_2654 | yehl      | CDS  |
| O157                 | 2880136           | ns                | rec    | G2583_2654 | yehl      | CDS  |
| O157                 | 2880192           | ns                | rec    | G2583_2654 | yehl      | CDS  |
| O157                 | 2880196           | s                 | rec    | G2583_2654 | yehl      | CDS  |
| O157                 | 2880203           | ns                | rec    | G2583_2654 | yehl      | CDS  |
| O157                 | 2880204           | ns                | rec    | G2583_2654 | yehl      | CDS  |
| O157                 | 2880224           | s                 | rec    | G2583_2654 | yehl      | CDS  |
| O157                 | 2880232           | s                 | rec    | G2583_2654 | yehl      | CDS  |
| O157                 | 2880238           | ns                | rec    | G2583_2654 | yehl      | CDS  |
| O157                 | 2880249           | ns                | rec    | G2583_2654 | yehl      | CDS  |
| O157                 | 2880255           | ns                | rec    | G2583_2654 | yehl      | CDS  |
| O157                 | 2880259           | s                 | rec    | G2583_2654 | yehl      | CDS  |
| O157                 | 2880366           | ns                | rec    | G2583_2654 | yehl      | CDS  |
| O157                 | 2880379           | s                 | rec    | G2583_2654 | yehl      | CDS  |
| O157                 | 2880408           | ns                | rec    | G2583_2654 | yehl      | CDS  |
| O157                 | 2880422           | ns                | rec    | G2583_2654 | yehl      | CDS  |
| O157                 | 2880487           | s                 | rec    | G2583_2654 | yehl      | CDS  |
| O157                 | 2880536           | s                 | rec    | G2583_2654 | yehl      | CDS  |
| O157                 | 2880553           | s                 | rec    | G2583_2654 | yehl      | CDS  |
| O157                 | 2880799           | s                 | rec    | G2583_2654 | yehl      | CDS  |
| O157                 | 2880826           | s                 | rec    | G2583_2654 | yehl      | CDS  |
| O157                 | 2880841           | s                 | rec    | G2583_2654 | yehl      | CDS  |
| O157                 | 2880868           | s                 | rec    | G2583_2654 | yehl      | CDS  |
| O157                 | 2880890           | ns                | rec    | G2583_2654 | yehl      | CDS  |
| O157                 | 2880943           | s                 | rec    | G2583_2654 | yehl      | CDS  |
| O157                 | 2880996           | ns                | rec    | G2583_2654 | yehl      | CDS  |
| O157                 | 2881072           | s                 | rec    | G2583_2654 | yehl      | CDS  |
| O157                 | 2881079           | ns                | rec    | G2583_2654 | yehl      | CDS  |
| O157                 | 2881081           | ns                | rec    | G2583_2654 | yehl      | CDS  |
| O157                 | 2881090           | ns                | rec    | G2583_2654 | yehl      | CDS  |
| O157                 | 2881099           | s                 | rec    | G2583_2654 | yehl      | CDS  |
| O157                 | 2881123           | s                 | rec    | G2583_2654 | yehl      | CDS  |
| O157                 | 2881132           | ns                | rec    | G2583_2654 | yehl      | CDS  |
| O157                 | 2881135           | s                 | rec    | G2583_2654 | yehl      | CDS  |
| O157                 | 2881144           | s                 | rec    | G2583_2654 | yehl      | CDS  |
| O157                 | 2881150           | s                 | rec    | G2583_2654 | yehl      | CDS  |
| O157                 | 2881156           | s                 | rec    | G2583_2654 | yehl      | CDS  |
| O157                 | 2881159           | s                 | rec    | G2583_2654 | yehl      | CDS  |
| O157                 | 2881162           | s                 | rec    | G2583_2654 | yehl      | CDS  |
| O157                 | 2881165           | s                 | rec    | G2583_2654 | yehl      | CDS  |
| O157                 | 2881168           | s                 | rec    | G2583_2654 | yehl      | CDS  |
| O157                 | 2881174           | s                 | rec    | G2583_2654 | yehl      | CDS  |
| O157                 | 2881177           | s                 | rec    | G2583_2654 | yehl      | CDS  |

| lineage <sup>a</sup> | site <sup>b</sup> | mutation          |        | gene       | Gene name | Type |
|----------------------|-------------------|-------------------|--------|------------|-----------|------|
|                      |                   | type <sup>c</sup> | recomb |            |           |      |
| O157                 | 2881178           | ns                | rec    | G2583_2654 | yehl      | CDS  |
| O157                 | 2881180           | ns                | rec    | G2583_2654 | yehl      | CDS  |
| O157                 | 2881204           | ns                | rec    | G2583_2654 | yehl      | CDS  |
| O157                 | 2881207           | s                 | rec    | G2583_2654 | yehl      | CDS  |
| O157                 | 2881210           | s                 | rec    | G2583_2654 | yehl      | CDS  |
| O157                 | 2881222           | s                 | rec    | G2583_2654 | yehl      | CDS  |
| O157                 | 2881228           | ns                | rec    | G2583_2654 | yehl      | CDS  |
| O157                 | 2881274           | ns                | rec    | G2583_2654 | yehl      | CDS  |
| O157                 | 2881275           | ns                | rec    | G2583_2654 | yehl      | CDS  |
| O157                 | 2881283           | ns                | rec    | G2583_2654 | yehl      | CDS  |
| O157                 | 2881294           | s                 | rec    | G2583_2654 | yehl      | CDS  |
| O157                 | 2881312           | s                 | rec    | G2583_2654 | yehl      | CDS  |
| O157                 | 2881429           | s                 | rec    | G2583_2654 | yehl      | CDS  |
| O157                 | 2881534           | s                 | rec    | G2583_2654 | yehl      | CDS  |
| O157                 | 2881543           | s                 | rec    | G2583_2654 | yehl      | CDS  |
| O157                 | 2881546           | s                 | rec    | G2583_2654 | yehl      | CDS  |
| O157                 | 2881568           | del-3             | rec    | G2583_2654 | yehl      | CDS  |
| O157                 | 2881593           | ns                | rec    | G2583_2654 | yehl      | CDS  |
| O157                 | 2881594           | ns                | rec    | G2583_2654 | yehl      | CDS  |
| O157                 | 2881597           | s                 | rec    | G2583_2654 | yehl      | CDS  |
| O157                 | 2881603           | s                 | rec    | G2583_2654 | yehl      | CDS  |
| O157                 | 2881606           | s                 | rec    | G2583_2654 | yehl      | CDS  |
| O157                 | 2881613           | s                 | rec    | G2583_2654 | yehl      | CDS  |
| O157                 | 2881652           | ns                | rec    | G2583_2654 | yehl      | CDS  |
| O157                 | 2881657           | s                 | rec    | G2583_2654 | yehl      | CDS  |
| O157                 | 2881666           | s                 | rec    | G2583_2654 | yehl      | CDS  |
| O157                 | 2881673           | ns                | rec    | G2583_2654 | yehl      | CDS  |
| O157                 | 2881674           | ns                | rec    | G2583_2654 | yehl      | CDS  |
| O157                 | 2881675           | ns                | rec    | G2583_2654 | yehl      | CDS  |
| O157                 | 2881676           | ns                | rec    | G2583_2654 | yehl      | CDS  |
| O157                 | 2881678           | ns                | rec    | G2583_2654 | yehl      | CDS  |
| O157                 | 2881687           | ns                | rec    | G2583_2654 | yehl      | CDS  |
| O157                 | 2881693           | s                 | rec    | G2583_2654 | yehl      | CDS  |
| O157                 | 2881711           | s                 | rec    | G2583_2654 | yehl      | CDS  |
| O157                 | 2881773           | ns                | rec    | G2583_2654 | yehl      | CDS  |
| O157                 | 2881795           | s                 | rec    | G2583_2654 | yehl      | CDS  |
| O157                 | 2881819           | ns                | rec    | G2583_2654 | yehl      | CDS  |
| O157                 | 2881846           | s                 | rec    | G2583_2654 | yehl      | CDS  |
| O157                 | 2882072           | ns                | rec    | G2583_2654 | yehl      | CDS  |
| O157                 | 2882080           | s                 | rec    | G2583_2654 | yehl      | CDS  |
| O157                 | 2882169           | ns                | rec    | G2583_2654 | yehl      | CDS  |
| O157                 | 2882185           | s                 | rec    | G2583_2654 | yehl      | CDS  |
| O157                 | 2882194           | s                 | rec    | G2583_2654 | yehl      | CDS  |
| O157                 | 2882203           | s                 | rec    | G2583_2654 | yehl      | CDS  |
| O157                 | 2882212           | s                 | rec    | G2583_2654 | yehl      | CDS  |

| lineage <sup>a</sup> | site <sup>b</sup> | mutation          |        | gene       | Gene name | Type |
|----------------------|-------------------|-------------------|--------|------------|-----------|------|
|                      |                   | type <sup>c</sup> | recomb |            |           |      |
| O157                 | 2882246           | ns                | rec    | G2583_2654 | yehI      | CDS  |
| O157                 | 2882318           | ns                | rec    | G2583_2654 | yehI      | CDS  |
| O157                 | 2882347           | s                 | rec    | G2583_2654 | yehI      | CDS  |
| O157                 | 2882394           | ns                | rec    | G2583_2654 | yehI      | CDS  |
| O157                 | 2882396           | ns                | rec    | G2583_2654 | yehI      | CDS  |
| O157                 | 2882440           | s                 | rec    | G2583_2654 | yehI      | CDS  |
| O157                 | 2882534           | s                 | rec    | G2583_2654 | yehI      | CDS  |
| O157                 | 2882580           | ns                | rec    | G2583_2654 | yehI      | CDS  |
| O157                 | 2882582           | ns                | rec    | G2583_2654 | yehI      | CDS  |
| O157                 | 2882606           | ns                | rec    | G2583_2654 | yehI      | CDS  |
| O157                 | 2882649           | ins               | rec    | G2583_2654 | yehI      | CDS  |
| O157                 | 2882685           | i                 | rec    | intergenic |           |      |
| O157                 | 2882854           | ns                | rec    | G2583_2655 | yehK      | CDS  |
| O157                 | 2882856           | ns                | rec    | G2583_2655 | yehK      | CDS  |
| O157                 | 2883046           | i                 | rec    | intergenic |           |      |
| O157                 | 2883071           | i                 | rec    | intergenic |           |      |
| O157                 | 2883831           | i                 | rec    | intergenic |           |      |
| O157                 | 2883961           | ins               | rec    | intergenic |           |      |
| O157                 | 2884151           | i                 | rec    | intergenic |           |      |
| O157                 | 2885217           | s                 |        | G2583_2656 | yehL      | CDS  |
| O157                 | 2885926           | s                 |        | G2583_2657 | yehM      | CDS  |
| O157                 | 2886896           | ns                |        | G2583_2657 | yehM      | CDS  |
| O157                 | 2887410           | ns                |        | G2583_2657 | yehM      | CDS  |
| O157                 | 2887489           | s                 |        | G2583_2657 | yehM      | CDS  |
| O157                 | 2887818           | ns                |        | G2583_2658 | yehP      | CDS  |
| CB9615               | 2680283           | ns                |        | G2583_2659 | yehQ      | CDS  |
| EDL933               | 2961114           | ns                |        | ECs2932    | -         | CDS  |
| Sakai                | 2891902           | ns                |        | ECs2933    | -         | CDS  |
| CB9615               | 2681224           | ns                |        | G2583_2660 | yehR      | CDS  |
| CB9615               | 2682624           | s                 |        | G2583_2663 | yehU      | CDS  |
| O157                 | 2894159           | ns                |        | G2583_2663 | yehU      | CDS  |
| O157                 | 2895652           | i                 |        | intergenic |           |      |
| EDL933               | 2967471           | ns                | rec    | ECs2941    | -         | CDS  |
| EDL933               | 2967473           | ns                | rec    | ECs2941    | -         | CDS  |
| EDL933               | 2967474           | ns                | rec    | ECs2941    | -         | CDS  |
| EDL933               | 2967744           | ns                | rec    | ECs2941    | -         | CDS  |
| EDL933               | 2967789           | ns                | rec    | ECs2941    | -         | CDS  |
| EDL933               | 2967816           | ins               | rec    | ECs2941    | -         | CDS  |
| EDL933               | 2967817           | s                 | rec    | ECs2941    | -         | CDS  |
| EDL933               | 2967909           | s                 | rec    | ECs2941    | -         | CDS  |
| EDL933               | 2967951           | s                 | rec    | ECs2941    | -         | CDS  |
| EDL933               | 2967955           | ns                | rec    | ECs2941    | -         | CDS  |
| EDL933               | 2967956           | ns                | rec    | ECs2941    | -         | CDS  |
| EDL933               | 2967963           | s                 | rec    | ECs2941    | -         | CDS  |
| EDL933               | 2967984           | ns                | rec    | ECs2941    | -         | CDS  |

| lineage <sup>a</sup> | site <sup>b</sup> | mutation          |        | gene         | Gene name | Type |
|----------------------|-------------------|-------------------|--------|--------------|-----------|------|
|                      |                   | type <sup>c</sup> | recomb |              |           |      |
| EDL933               | 2968117           | ns                | rec    | ECs2941      | -         | CDS  |
| EDL933               | 2968149           | ns                | rec    | ECs2941      | -         | CDS  |
| EDL933               | 2968237           | ns                | rec    | ECs2941      | -         | CDS  |
| EDL933               | 2968388           | ns                | rec    | ECs2941      | -         | CDS  |
| EDL933               | 2968654           | ns                | rec    | ECs2942      | -         | CDS  |
| EDL933               | 2968678           | ns                | rec    | ECs2942      | -         | CDS  |
| EDL933               | 2968765           | ns                | rec    | ECs2942      | -         | CDS  |
| EDL933               | 2968894           | s                 | rec    | ECs2942      | -         | CDS  |
| EDL933               | 2968933           | s                 | rec    | ECs2942      | -         | CDS  |
| EDL933               | 2968951           | s                 | rec    | ECs2942      | -         | CDS  |
| EDL933               | 2990240           | i                 | rec    | intergenic   |           |      |
| EDL933               | 2990247           | i                 | rec    | intergenic   |           |      |
| EDL933               | 2990257           | i                 | rec    | intergenic   |           |      |
| EDL933               | 2990261           | i                 | rec    | intergenic   |           |      |
| EDL933               | 2990274           | i                 | rec    | intergenic   |           |      |
| EDL933               | 2990281           | ins               | rec    | intergenic   |           |      |
| EDL933               | 2990345           | i                 | rec    | intergenic   |           |      |
| EDL933               | 2990377           | i                 | rec    | intergenic   |           |      |
| EDL933               | 2990520           | ns                | rec    | ECs2965-2966 | -         | CDS  |
| EDL933               | 2990657           | s                 | rec    | ECs2966      | -         | CDS  |
| EDL933               | 2990693           | ns                | rec    | ECs2966      | -         | CDS  |
| EDL933               | 2990711           | ns                | rec    | ECs2966      | -         | CDS  |
| EDL933               | 2990723           | ns                | rec    | ECs2966      | -         | CDS  |
| EDL933               | 2990726           | ns                | rec    | ECs2966      | -         | CDS  |
| EDL933               | 2990729           | ns                | rec    | ECs2966      | -         | CDS  |
| EDL933               | 2990733           | ns                | rec    | ECs2966      | -         | CDS  |
| EDL933               | 2990735           | ns                | rec    | ECs2966      | -         | CDS  |
| EDL933               | 2990779           | ns                | rec    | ECs2966      | -         | CDS  |
| EDL933               | 2990780           | ns                | rec    | ECs2966      | -         | CDS  |
| EDL933               | 2990781           | ns                | rec    | ECs2966      | -         | CDS  |
| EDL933               | 2990783           | ns                | rec    | ECs2966      | -         | CDS  |
| EDL933               | 2990786           | ns                | rec    | ECs2966      | -         | CDS  |
| EDL933               | 2990789           | ns                | rec    | ECs2966      | -         | CDS  |
| EDL933               | 2991336           | ns                | rec    | ECs2967      | -         | CDS  |
| EDL933               | 2991733           | i                 | rec    | intergenic   |           |      |
| EDL933               | 2991742           | i                 | rec    | intergenic   |           |      |
| EDL933               | 2995440           | i                 | rec    | intergenic   |           |      |
| EDL933               | 2995546           | i                 | rec    | intergenic   |           |      |
| EDL933               | 2995550           | i                 | rec    | intergenic   |           |      |
| EDL933               | 2995555           | i                 | rec    | intergenic   |           |      |
| EDL933               | 2995562           | i                 | rec    | intergenic   |           |      |
| EDL933               | 2995569           | i                 | rec    | intergenic   |           |      |
| EDL933               | 2995575           | i                 | rec    | intergenic   |           |      |
| EDL933               | 2995589           | i                 | rec    | intergenic   |           |      |
| EDL933               | 2995593           | i                 | rec    | intergenic   |           |      |

| lineage <sup>a</sup> | site <sup>b</sup> | mutation          |        | gene         | Gene name | Type |
|----------------------|-------------------|-------------------|--------|--------------|-----------|------|
|                      |                   | type <sup>c</sup> | recomb |              |           |      |
| EDL933               | 2995594           | i                 | rec    | intergenic   |           |      |
| EDL933               | 2995596           | i                 | rec    | intergenic   |           |      |
| EDL933               | 2995598           | i                 | rec    | intergenic   |           |      |
| EDL933               | 2995602           | i                 | rec    | intergenic   |           |      |
| EDL933               | 2995611           | i                 | rec    | intergenic   |           |      |
| EDL933               | 2995613           | i                 | rec    | intergenic   |           |      |
| EDL933               | 2995614           | i                 | rec    | intergenic   |           |      |
| EDL933               | 2995615           | i                 | rec    | intergenic   |           |      |
| EDL933               | 2995617           | i                 | rec    | intergenic   |           |      |
| EDL933               | 2997577           | ns                | rec    | ECs2975      | -         | CDS  |
| EDL933               | 2998210           | ns                | rec    | ECs2977      | -         | CDS  |
| EDL933               | 2999850           | ns                | rec    | ECs2981      | -         | CDS  |
| EDL933               | 2999956           | ns                | rec    | ECs2981      | -         | CDS  |
| EDL933               | 2999998           | ns                | rec    | ECs2982      | -         | CDS  |
| EDL933               | 3000304           | ns                | rec    | ECs2982      | -         | CDS  |
| EDL933               | 3000480           | ins               | rec    | ECs2983      | -         | CDS  |
| EDL933               | 3000716           | ns                | rec    | ECs2983      | -         | CDS  |
| EDL933               | 3000894           | i                 | rec    | intergenic   |           |      |
| EDL933               | 3000900           | i                 | rec    | intergenic   |           |      |
| EDL933               | 3000910           | i                 | rec    | intergenic   |           |      |
| EDL933               | 3000912           | i                 | rec    | intergenic   |           |      |
| EDL933               | 3000922           | i                 | rec    | intergenic   |           |      |
| EDL933               | 3001094           | ns                | rec    | ECs2984      | -         | CDS  |
| EDL933               | 3001404           | ns                | rec    | ECs2985      | -         | CDS  |
| EDL933               | 3001730           | ns                | rec    | ECs2986      | -         | CDS  |
| EDL933               | 3001900           | ns                | rec    | ECs2986      | -         | CDS  |
| EDL933               | 3002123           | ns                | rec    | ECs2986      | -         | CDS  |
| EDL933               | 3002606           | ns                | rec    | ECs2987      | -         | CDS  |
| EDL933               | 3002943           | ns                | rec    | ECs2987      | -         | CDS  |
| EDL933               | 3003917           | i                 | rec    | intergenic   |           |      |
| EDL933               | 3004295           | ns                | rec    | ECs2990      | -         | CDS  |
| EDL933               | 3004308           | ns                | rec    | ECs2990      | -         | CDS  |
| EDL933               | 3004865           | ns                | rec    | ECs2991      | -         | CDS  |
| EDL933               | 3004878           | ins               | rec    | ECs2991      | -         | CDS  |
| EDL933               | 3005393           | ns                | rec    | ECs2992      | -         | CDS  |
| EDL933               | 3006567           | ins               | rec    | ECs2995      | -         | CDS  |
| EDL933               | 3007820           | ns                | rec    | ECs2997-2998 | -         | CDS  |
| EDL933               | 3007962           | ns                | rec    | ECs2998-2999 | -         | CDS  |
| EDL933               | 3008087           | ns                | rec    | ECs2999-3000 | -         | CDS  |
| EDL933               | 3008391           | ns                | rec    | ECs3001      | -         | CDS  |
| EDL933               | 3008986           | ns                | rec    | ECs3001      | -         | CDS  |
| EDL933               | 3009737           | ns                | rec    | ECs3002      | -         | CDS  |
| EDL933               | 3010456           | ns                | rec    | ECs3005      | -         | CDS  |
| EDL933               | 3010459           | ns                | rec    | ECs3005      | -         | CDS  |
| EDL933               | 3010509           | i                 | rec    | intergenic   |           |      |

| lineage <sup>a</sup> | site <sup>b</sup> | mutation          |        | gene       | Gene name | Type |
|----------------------|-------------------|-------------------|--------|------------|-----------|------|
|                      |                   | type <sup>c</sup> | recomb |            |           |      |
| EDL933               | 3010557           | i                 | rec    | intergenic |           |      |
| EDL933               | 3010570           | ns                | rec    | ECs3006    | -         | CDS  |
| EDL933               | 3010611           | ns                | rec    | ECs3006    | -         | CDS  |
| EDL933               | 3010629           | ns                | rec    | ECs3006    | -         | CDS  |
| EDL933               | 3010639           | ns                | rec    | ECs3006    | -         | CDS  |
| EDL933               | 3010645           | ns                | rec    | ECs3006    | -         | CDS  |
| EDL933               | 3011882           | ns                | rec    | ECs3008    | -         | CDS  |
| EDL933               | 3012893           | ns                | rec    | ECs3010    | -         | CDS  |
| EDL933               | 3013049           | ns                | rec    | ECs3011    | -         | CDS  |
| O157                 | 2944126           | ns                |        | G2583_2664 | mlrA      | CDS  |
| O157                 | 2945204           | s                 |        | G2583_2665 | yehW      | CDS  |
| O157                 | 2946097           | s                 |        | G2583_2666 | yehX      | CDS  |
| O157                 | 2946884           | s                 |        | G2583_2667 | yehY      | CDS  |
| O157                 | 2947090           | s                 |        | G2583_2667 | yehY      | CDS  |
| O157                 | 2947671           | ns                |        | G2583_2668 | osmF      | CDS  |
| O157                 | 2949320           | ns                |        | G2583_2669 | bglX      | CDS  |
| O157                 | 2951226           | ns                |        | G2583_2670 | dld       | CDS  |
| Sakai                | 2954379           | ns                |        | G2583_2672 | yohC      | CDS  |
| O157                 | 2954807           | ns                |        | G2583_2673 | yohD      | CDS  |
| O157                 | 2956842           | s                 |        | G2583_2675 | yohG      | CDS  |
| EDL933               | 3029502           | del               |        | G2583_2676 | -         | CDS  |
| EDL933               | 3029797           | ns                |        | G2583_2677 | dusC      | CDS  |
| O157                 | 2961481           | ns                |        | G2583_2680 | -         | CDS  |
| CB9615               | 2702853           | s                 |        | G2583_2681 | gtdA      | CDS  |
| O157                 | 2963486           | ns                |        | G2583_2682 | -         | CDS  |
| EDL933               | 3035541           | ns                |        | G2583_2682 | -         | CDS  |
| O157                 | 2964565           | ns                |        | G2583_2683 | -         | CDS  |
| O157                 | 2965013           | s                 |        | G2583_2683 | -         | CDS  |
| O157                 | 2967804           | i                 |        | intergenic |           |      |
| CB9615               | 2710116           | s                 |        | G2583_2689 | yeiT      | CDS  |
| CB9615               | 2710575           | s                 |        | G2583_2689 | yeiT      | CDS  |
| O157                 | 2971595           | i                 |        | intergenic |           |      |
| EDL933               | 3042907           | ins               |        | intergenic |           |      |
| CB9615               | 2713639           | ns                |        | G2583_2692 | mgIA      | CDS  |
| Sakai                | 2974286           | i                 |        | intergenic |           |      |
| O157                 | 2975504           | del               |        | intergenic |           |      |
| EDL933               | 3046860           | ins               |        | intergenic |           |      |
| CB9615               | 2717627           | s                 |        | G2583_2695 | yeiB      | CDS  |
| CB9615               | 2717984           | s                 |        | G2583_2695 | yeiB      | CDS  |
| O157                 | 2977922           | s                 |        | G2583_2695 | yeiB      | CDS  |
| CB9615               | 2722860           | s                 |        | G2583_2699 | lysP      | CDS  |
| O157                 | 2988888           | s                 |        | G2583_2704 | nupX      | CDS  |
| O157                 | 2989231           | ns                |        | G2583_2705 | rihB      | CDS  |
| O157                 | 2992981           | s                 |        | G2583_2708 | yeiN      | CDS  |
| CB9615               | 2733841           | s                 |        | G2583_2708 | yeiN      | CDS  |

| lineage <sup>a</sup> | site <sup>b</sup> | mutation          |        | gene       | Gene name | Type       |
|----------------------|-------------------|-------------------|--------|------------|-----------|------------|
|                      |                   | type <sup>c</sup> | recomb |            |           |            |
| O157                 | 2994900           | s                 |        | G2583_2710 | fruA      | CDS        |
| CB9615               | 2741548           | ns                |        | G2583_2714 | yeiP      | CDS        |
| O157                 | 3002581           | ns                |        | G2583_2715 | yeiQ      | CDS        |
| CB9615               | 2745239           | s                 |        | G2583_2717 | yeiU      | CDS        |
| O157                 | 3004830           | i                 |        | intergenic |           |            |
| O157                 | 3005531           | i                 |        | intergenic |           |            |
| EDL933               | 3076899           | ins               |        | intergenic |           |            |
| O157                 | 3007656           | s                 |        | G2583_2720 | yejA      | CDS        |
| O157                 | 3008692           | ns                |        | G2583_2720 | yejA      | CDS        |
| O157                 | 3008913           | s                 |        | G2583_2720 | yejA      | CDS        |
| CB9615               | 2750259           | ns                |        | G2583_2721 | yejB      | CDS        |
| CB9615               | 2750480           | ns                |        | G2583_2721 | yejB      | CDS        |
| CB9615               | 2750652           | s                 |        | G2583_2721 | yejB      | CDS        |
| O157                 | 3012972           | ns                |        | G2583_2724 | yejG      | CDS        |
| CB9615               | 2758080           | i                 |        | intergenic |           |            |
| O157                 | 3017596           | ns                |        | G2583_2728 | rplY      | CDS        |
| CB9615               | 2761038           | s                 |        | G2583_2731 | yejM      | CDS        |
| O157                 | 3021132           | i                 |        | intergenic |           |            |
| O157                 | 3021297           | i                 |        | intergenic |           |            |
| O157                 | 3022574           | ns                |        | G2583_2733 | yejO      | CDS        |
| CB9615               | 2763372           | s                 |        | G2583_2733 | yejO      | CDS        |
| CB9615               | 2763800           | ns                |        | G2583_2733 | yejO      | CDS        |
| O157                 | 3026664           | s                 |        | G2583_2737 | ccmF      | CDS        |
| CB9615               | 2769093           | s                 |        | G2583_2737 | ccmF      | CDS        |
| O157                 | 3032970           | s                 |        | G2583_2745 | napH      | CDS        |
| O157                 | 3033422           | ns                |        | G2583_2746 | napG      | CDS        |
| CB9615               | 2776008           | ns                |        | G2583_2747 | napA      | CDS        |
| O157                 | 3036534           | s                 |        | G2583_2748 | napD      | CDS        |
| CB9615               | 2778229           | s                 |        | G2583_2750 | eco       | CDS        |
| O157                 | 3040123           | ns                |        | G2583_2752 | yojI      | CDS        |
| EDL933               | 3115208           | s                 |        | G2583_2755 | apbE      | CDS        |
| CB9615               | 2786336           | s                 |        | G2583_2756 | ompC      | CDS        |
| CB9615               | 2787328           | s                 |        | G2583_2758 | rscD      | CDS        |
| O157                 | 3052087           | s                 |        | G2583_2760 | rscC      | CDS        |
| CB9615               | 2794107           | ns                |        | G2583_2761 | yfaP      | CDS        |
| O157                 | 3053374           | s                 |        | G2583_2761 | yfaP      | CDS        |
| O157                 | 3054296           | nc                |        | G2583_2762 | yfaQ      | pseudogene |
| O157                 | 3054400           | nc                |        | G2583_2762 | yfaQ      | pseudogene |
| CB9615               | 2795498           | nc                |        | G2583_2762 | yfaQ      | pseudogene |
| CB9615               | 2800777           | nc                |        | G2583_2766 | yfaS      | pseudogene |
| CB9615               | 2800837           | nc                |        | G2583_2766 | yfaS      | pseudogene |
| O157                 | 3062397           | del               |        | G2583_2768 | yfaA      | CDS        |
| O157                 | 3064399           | s                 |        | G2583_2769 | gyrA      | CDS        |
| O157                 | 3068185           | ns                |        | G2583_2771 | yfaL      | CDS        |
| O157                 | 3069776           | s                 |        | G2583_2771 | yfaL      | CDS        |



| lineage <sup>a</sup> | site <sup>b</sup> | mutation          |        | gene       | Gene name | Type       |
|----------------------|-------------------|-------------------|--------|------------|-----------|------------|
|                      |                   | type <sup>c</sup> | recomb |            |           |            |
| O157                 | 3070402           | i                 |        | intergenic |           |            |
| Sakai                | 3071058           | s                 |        | G2583_2772 | nrdA      | CDS        |
| CB9615               | 2815789           | ns                |        | G2583_2773 | nrdB      | CDS        |
| CB9615               | 2817852           | nc                |        | G2583_2776 | -         | pseudogene |
| CB9615               | 2818960           | s                 |        | G2583_2777 | yfaH      | CDS        |
| O157                 | 3078076           | ns                |        | G2583_2778 | -         | CDS        |
| CB9615               | 2824138           | i                 |        | intergenic |           |            |
| O157                 | 3081966           | i                 |        | intergenic |           |            |
| CB9615               | 2827682           | ns                |        | G2583_2783 | glpC      | CDS        |
| CB9615               | 2829254           | ns                |        | G2583_2784 | yfaD      | CDS        |
| O157                 | 3088027           | del               |        | G2583_2785 | yfaU      | CDS        |
| O157                 | 3088239           | ns                |        | G2583_2786 | yfaV      | CDS        |
| CB9615               | 2831622           | s                 |        | G2583_2787 | yfaW      | CDS        |
| O157                 | 3090881           | s                 |        | G2583_2787 | yfaW      | CDS        |
| CB9615               | 2835844           | i                 |        | intergenic |           |            |
| O157                 | 3096465           | s                 |        | G2583_2793 | arnB      | CDS        |
| O157                 | 3097793           | s                 |        | G2583_2794 | arnC      | CDS        |
| CB9615               | 2838888           | s                 |        | G2583_2794 | arnC      | CDS        |
| O157                 | 3099391           | s                 |        | G2583_2795 | arnA      | CDS        |
| CB9615               | 2844947           | ns                |        | G2583_2800 | pmrD      | CDS        |
| O157                 | 3104427           | ns                |        | G2583_2801 | menE      | CDS        |
| Sakai                | 3104535           | ns                |        | G2583_2801 | menE      | CDS        |
| O157                 | 3105313           | s                 |        | G2583_2801 | menE      | CDS        |
| O157                 | 3105362           | ns                |        | G2583_2801 | menE      | CDS        |
| O157                 | 3112634           | ns                |        | G2583_2809 | rbn       | CDS        |
| CB9615               | 2854331           | nc                |        | G2583_2810 | elaD      | pseudogene |
| O157                 | 3113601           | nc                |        | G2583_2810 | elaD      | pseudogene |
| CB9615               | 2854769           | nc                |        | G2583_2810 | elaD      | pseudogene |
| O157                 | 3114041           | ins-9             |        | G2583_2810 | elaD      | pseudogene |
| CB9615               | 2854935           | nc                | rec    | G2583_2810 | elaD      | pseudogene |
| CB9615               | 2854936           | nc                | rec    | G2583_2810 | elaD      | pseudogene |
| CB9615               | 2854938           | nc                | rec    | G2583_2810 | elaD      | pseudogene |
| CB9615               | 2854941           | nc                | rec    | G2583_2810 | elaD      | pseudogene |
| O157                 | 3114413           | nc                |        | G2583_2810 | elaD      | pseudogene |
| CB9615               | 2855917           | i                 |        | intergenic |           |            |
| CB9615               | 2860078           | i                 |        | intergenic |           |            |
| CB9615               | 2860437           | s                 |        | G2583_2815 | nuoL      | CDS        |
| CB9615               | 2862431           | ns                |        | G2583_2817 | nuoJ      | CDS        |
| EDL933               | 3193281           | s                 |        | G2583_2819 | nuoH      | CDS        |
| O157                 | 3124715           | s                 |        | G2583_2820 | nuoG      | CDS        |
| O157                 | 3126514           | s                 |        | G2583_2821 | nuoF      | CDS        |
| CB9615               | 2874438           | i                 |        | intergenic |           |            |
| O157                 | 3133563           | i                 |        | intergenic |           |            |
| CB9615               | 2875345           | ns                |        | G2583_2827 | yfbQ      | CDS        |
| O157                 | 3134715           | ns                |        | G2583_2827 | yfbQ      | CDS        |

| lineage <sup>a</sup> | site <sup>b</sup> | mutation          |        | gene       | Gene name | Type |
|----------------------|-------------------|-------------------|--------|------------|-----------|------|
|                      |                   | type <sup>c</sup> | recomb |            |           |      |
| CB9615               | 2877862           | s                 |        | G2583_2829 | yfbS      | CDS  |
| O157                 | 3137373           | s                 |        | G2583_2829 | yfbS      | CDS  |
| O157                 | 3138049           | s                 |        | G2583_2830 | yfbT      | CDS  |
| Sakai                | 3139077           | ins               |        | G2583_2832 | yfbV      | CDS  |
| CB9615               | 2881452           | s                 |        | G2583_2833 | ackA      | CDS  |
| O157                 | 3141268           | s                 |        | G2583_2834 | pta       | CDS  |
| CB9615               | 2883023           | ns                |        | G2583_2834 | pta       | CDS  |
| CB9615               | 2883148           | s                 |        | G2583_2834 | pta       | CDS  |
| O157                 | 3145135           | s                 |        | G2583_2836 | yfcD      | CDS  |
| CB9615               | 2886331           | s                 |        | G2583_2837 | yfcE      | CDS  |
| CB9615               | 2886962           | s                 |        | G2583_2838 | yfcF      | CDS  |
| O157                 | 3148281           | ns                |        | G2583_2841 | yfcH      | CDS  |
| O157                 | 3149385           | ns                |        | G2583_2842 | yfcI      | CDS  |
| O157                 | 3150027           | s                 |        | G2583_2843 | hisP      | CDS  |
| O157                 | 3151705           | ns                |        | G2583_2845 | hisQ      | CDS  |
| CB9615               | 2893786           | ns                |        | G2583_2846 | hisJ      | CDS  |
| O157                 | 3154447           | s                 |        | G2583_2848 | ubiX      | CDS  |
| EDL933               | 3226930           | ins               |        | intergenic |           |      |
| O157                 | 3157188           | i                 |        | intergenic |           |      |
| CB9615               | 2898274           | i                 |        | intergenic |           |      |
| O157                 | 3157296           | i                 |        | intergenic |           |      |
| CB9615               | 2898365           | i                 |        | intergenic |           |      |
| CB9615               | 2898989           | ns                |        | G2583_2851 | dedD      | CDS  |
| CB9615               | 2899321           | s                 |        | G2583_2852 | folC      | CDS  |
| O157                 | 3159034           | ns                |        | G2583_2852 | folC      | CDS  |
| O157                 | 3160750           | s                 |        | G2583_2854 | dedA      | CDS  |
| O157                 | 3160813           | s                 |        | G2583_2854 | dedA      | CDS  |
| O157                 | 3162697           | s                 |        | G2583_2856 | usg       | CDS  |
| O157                 | 3162969           | ns                |        | G2583_2856 | usg       | CDS  |
| O157                 | 3164529           | ns                |        | G2583_2858 | flk       | CDS  |
| CB9615               | 2906928           | s                 |        | G2583_2859 | yfcJ      | CDS  |
| CB9615               | 2907464           | ns                |        | G2583_2859 | yfcJ      | CDS  |
| CB9615               | 2908744           | s                 |        | G2583_2860 | fabB      | CDS  |
| O157                 | 3172360           | ns                |        | G2583_2865 | mepA      | CDS  |
| CB9615               | 2914753           | s                 |        | G2583_2866 | aroC      | CDS  |
| O157                 | 3177232           | ns                |        | G2583_2871 | yfcQ      | CDS  |
| O55/O157             | 2918934           | s                 |        | G2583_2872 | yfcR      | CDS  |
| O157                 | 3178295           | s                 |        | G2583_2873 | yfcS      | CDS  |
| O157                 | 3178299           | ns                |        | G2583_2873 | yfcS      | CDS  |
| O157                 | 3179215           | ns                |        | G2583_2874 | yfcU      | CDS  |
| CB9615               | 2920321           | s                 |        | G2583_2874 | yfcU      | CDS  |
| CB9615               | 2920930           | ns                |        | G2583_2874 | yfcU      | CDS  |
| CB9615               | 2921624           | s                 |        | G2583_2874 | yfcU      | CDS  |
| O157                 | 3181965           | s                 |        | G2583_2875 | yfcV      | CDS  |
| O157                 | 3182373           | i                 |        | intergenic |           |      |

| lineage <sup>a</sup> | site <sup>b</sup> | mutation          |        | gene       | Gene name | Type |
|----------------------|-------------------|-------------------|--------|------------|-----------|------|
|                      |                   | type <sup>c</sup> | recomb |            |           |      |
| O55/O157             | 2923576           | i                 |        | intergenic |           |      |
| CB9615               | 2923726           | i                 |        | intergenic |           |      |
| O157                 | 3183685           | s                 |        | G2583_2877 | fadJ      | CDS  |
| O157                 | 3184174           | s                 |        | G2583_2877 | fadJ      | CDS  |
| CB9615               | 2925279           | ns                |        | G2583_2877 | fadJ      | CDS  |
| O157                 | 3184895           | ns                |        | G2583_2877 | fadJ      | CDS  |
| O157                 | 3185787           | s                 |        | G2583_2878 | fadI      | CDS  |
| CB9615               | 2927725           | ns                |        | G2583_2878 | fadI      | CDS  |
| O157                 | 3190466           | i                 |        | intergenic |           |      |
| O157                 | 3190467           | i                 |        | intergenic |           |      |
| O157                 | 3190468           | i                 |        | intergenic |           |      |
| O157                 | 3193091           | i                 |        | intergenic |           |      |
| CB9615               | 2935314           | ns                |        | G2583_2885 | intS      | CDS  |
| O55/O157             | 2937582           | ns                |        | G2583_2888 | -         | CDS  |
| CB9615               | 2937887           | s                 |        | G2583_2889 | -         | CDS  |
| O55/O157             | 2940866           | ns                |        | G2583_2891 | -         | CDS  |
| EDL933               | 3270066           | i                 |        | intergenic |           |      |
| EDL933               | 3270094           | i                 |        | intergenic |           |      |
| EDL933               | 3270095           | i                 |        | intergenic |           |      |
| CB9615               | 2944601           | ns                |        | G2583_2895 | cscK      | CDS  |
| EDL933               | 3274062           | ins               |        | G2583_2895 | cscK      | CDS  |
| EDL933               | 3274100           | ins               |        | G2583_2895 | cscK      | CDS  |
| EDL933               | 3274135           | ins               |        | G2583_2895 | cscK      | CDS  |
| O157                 | 3204972           | s                 |        | G2583_2896 | -         | CDS  |
| CB9615               | 2946740           | s                 |        | G2583_2896 | -         | CDS  |
| CB9615               | 2948484           | i                 |        | intergenic |           |      |
| CB9615               | 2949533           | ns                |        | G2583_2899 | dsdA      | CDS  |
| O157                 | 3209001           | ns                |        | G2583_2900 | emrY      | CDS  |
| CB9615               | 2950267           | s                 |        | G2583_2900 | emrY      | CDS  |
| O157                 | 3209571           | ns                |        | G2583_2900 | emrY      | CDS  |
| O157                 | 3210003           | ns                |        | G2583_2900 | emrY      | CDS  |
| CB9615               | 2951469           | ns                |        | G2583_2901 | emrK      | CDS  |
| O157                 | 3211415           | ns                |        | G2583_2901 | emrK      | CDS  |
| O157                 | 3211574           | i                 |        | intergenic |           |      |
| CB9615               | 2957581           | ns                |        | G2583_2904 | yfdE      | CDS  |
| O157                 | 3217124           | del-4             |        | G2583_2904 | yfdE      | CDS  |
| CB9615               | 2962985           | s                 |        | G2583_2908 | yfdX      | CDS  |
| O157                 | 3221960           | s                 |        | G2583_2908 | yfdX      | CDS  |
| O157                 | 3223188           | s                 |        | G2583_2910 | yfdY      | CDS  |
| EDL933               | 3293475           | ins               |        | intergenic |           |      |
| CB9615               | 2965198           | s                 |        | G2583_2911 | lpxP      | CDS  |
| CB9615               | 2965915           | i                 |        | intergenic |           |      |
| O157                 | 3225030           | i                 |        | intergenic |           |      |
| CB9615               | 2968369           | s                 |        | G2583_2913 | ypdA      | CDS  |
| O157                 | 3231110           | ns                |        | G2583_2916 | fryA      | CDS  |

| lineage <sup>a</sup> | site <sup>b</sup> | mutation          |        | gene       | Gene name | Type |
|----------------------|-------------------|-------------------|--------|------------|-----------|------|
|                      |                   | type <sup>c</sup> | recomb |            |           |      |
| O157                 | 3233895           | ns                |        | G2583_2918 | ypdF      | CDS  |
| CB9615               | 2975370           | ns                |        | G2583_2918 | ypdF      | CDS  |
| CB9615               | 2977625           | i                 |        | intergenic |           |      |
| O157                 | 3241222           | s                 |        | G2583_2926 | nupC      | CDS  |
| O157                 | 3241832           | ns                |        | G2583_2926 | nupC      | CDS  |
| CB9615               | 2986844           | ns                |        | G2583_2931 | yfeD      | CDS  |
| O55/O157             | 2987890           | s                 | rec    | G2583_2932 | ydcM      | CDS  |
| O55/O157             | 2987894           | ns                | rec    | G2583_2932 | ydcM      | CDS  |
| O55/O157             | 2988052           | ns                | rec    | G2583_2932 | ydcM      | CDS  |
| O55/O157             | 2988115           | s                 | rec    | G2583_2932 | ydcM      | CDS  |
| O55/O157             | 2988268           | s                 | rec    | G2583_2932 | ydcM      | CDS  |
| O55/O157             | 2988329           | ns                | rec    | G2583_2933 | -         | CDS  |
| O55/O157             | 2988334           | ns                | rec    | G2583_2933 | -         | CDS  |
| O55/O157             | 2988352           | s                 | rec    | G2583_2933 | -         | CDS  |
| O55/O157             | 2988355           | s                 | rec    | G2583_2933 | -         | CDS  |
| Sakai                | 3249294           | del               |        | intergenic |           |      |
| O157                 | 3250420           | s                 |        | G2583_2940 | yfeR      | CDS  |
| O157                 | 3250682           | ns                |        | G2583_2940 | yfeR      | CDS  |
| O157                 | 3253275           | s                 |        | G2583_2943 | ligA      | CDS  |
| EDL933               | 3325086           | del-12            |        | G2583_2944 | zipA      | CDS  |
| EDL933               | 3325106           | ns                |        | G2583_2944 | zipA      | CDS  |
| O157                 | 3258948           | s                 |        | G2583_2948 | ptsI      | CDS  |
| CB9615               | 3000279           | ns                |        | G2583_2948 | ptsI      | CDS  |
| O157                 | 3259260           | s                 |        | G2583_2948 | ptsI      | CDS  |
| CB9615               | 3000817           | s                 |        | G2583_2948 | ptsI      | CDS  |
| O157                 | 3260604           | ns                |        | G2583_2949 | crr       | CDS  |
| EDL933               | 3332114           | s                 |        | G2583_2952 | cysM      | CDS  |
| O157                 | 3262513           | ns                |        | G2583_2952 | cysM      | CDS  |
| CB9615               | 3004101           | i                 |        | intergenic |           |      |
| CB9615               | 3004715           | ns                |        | G2583_2953 | cysA      | CDS  |
| O157                 | 3269816           | s                 |        | G2583_2959 | murQ      | CDS  |
| O157                 | 3272219           | ns                |        | G2583_2961 | yfeW      | CDS  |
| O157                 | 3274130           | ns                |        | G2583_2963 | yfeY      | CDS  |
| O157                 | 3276796           | ns                |        | G2583_2967 | hemF      | CDS  |
| O157                 | 3278459           | ns                |        | G2583_2969 | eutK      | CDS  |
| Sakai                | 3280156           | ns                |        | G2583_2971 | eutC      | CDS  |
| CB9615               | 3024955           | s                 |        | G2583_2974 | eutH      | CDS  |
| O157                 | 3284361           | s                 |        | G2583_2974 | eutH      | CDS  |
| CB9615               | 3026506           | s                 |        | G2583_2975 | eutG      | CDS  |
| O157                 | 3286008           | ns                |        | G2583_2976 | eutJ      | CDS  |
| O157                 | 3286610           | s                 |        | G2583_2977 | eutE      | CDS  |
| CB9615               | 3028423           | ns                |        | G2583_2977 | eutE      | CDS  |
| CB9615               | 3028720           | ns                |        | G2583_2977 | eutE      | CDS  |
| O157                 | 3294196           | s                 |        | G2583_2985 | maeB      | CDS  |
| O157                 | 3295368           | s                 |        | G2583_2986 | talA      | CDS  |

| lineage <sup>a</sup> | site <sup>b</sup> | mutation          |        | gene            | Gene name | Type |
|----------------------|-------------------|-------------------|--------|-----------------|-----------|------|
|                      |                   | type <sup>c</sup> | recomb |                 |           |      |
| CB9615               | 3037397           | s                 |        | G2583_2987      | tkkB      | CDS  |
| O157                 | 3296437           | s                 |        | G2583_2987      | tkkB      | CDS  |
| O157                 | 3296635           | s                 |        | G2583_2987      | tkkB      | CDS  |
| CB9615               | 3040104           | ns                |        | G2583_2989      | nudK      | CDS  |
| CB9615               | 3040646           | ns                |        | G2583_2989      | nudK      | CDS  |
| O157                 | 3302045           | ns                |        | G2583_2991      | narQ      | CDS  |
| Sakai                | 3304097           | ns                |        | G2583_2992      | acrD      | CDS  |
| O157                 | 3304521           | ns                |        | G2583_2992      | acrD      | CDS  |
| O157                 | 3307260           | i                 |        | intergenic      |           |      |
| EDL933               | 3377329           | ns                |        | G2583_2993      | yffB      | CDS  |
| O157                 | 3307585           | ns                |        | G2583_2993      | yffB      | CDS  |
| O157                 | 3307707           | ns                |        | G2583_2993      | yffB      | CDS  |
| O157                 | 3310710           | s                 |        | G2583_2997      | ypfI      | CDS  |
| Sakai                | 3311013           | s                 |        | G2583_2997      | ypfI      | CDS  |
| O157                 | 3311217           | s                 |        | G2583_2997      | ypfI      | CDS  |
| CB9615               | 3053792           | s                 |        | G2583_2998      | ypfJ      | CDS  |
| CB9615               | 3054572           | s                 |        | G2583_2999      | purC      | CDS  |
| CB9615               | 3055812           | ns                |        | G2583_3000      | nlpB      | CDS  |
| O157                 | 3314926           | ns                |        | G2583_3000      | nlpB      | CDS  |
| O157                 | 3314943           | ns                |        | G2583_3000      | nlpB      | CDS  |
| CB9615               | 3058312           | i                 |        | intergenic      |           |      |
| O157                 | 3318095           | s                 |        | G2583_3005      | hyfB      | CDS  |
| CB9615               | 3059774           | ns                |        | G2583_3005      | hyfB      | CDS  |
| O157                 | 3318896           | s                 |        | G2583_3005      | hyfB      | CDS  |
| O157                 | 3321357           | ns                |        | G2583_3007      | hyfD      | CDS  |
| CB9615               | 3062763           | ns                |        | G2583_3007      | hyfD      | CDS  |
| CB9615               | 3063544           | del-6             |        | G2583_3008      | hyfE      | CDS  |
| CB9615               | 3066628           | ns                |        | G2583_3010      | hyfG      | CDS  |
| O157                 | 3327497           | ns                |        | G2583_3012      | hyfI      | CDS  |
| CB9615               | 3068611           | ns                |        | G2583_3012-3013 | hyfIJ     | CDS  |
| O157                 | 3328117           | s                 |        | G2583_3014      | hyfR      | CDS  |
| EDL933               | 3399850           | ins               |        | G2583_3014      | hyfR      | CDS  |
| EDL933               | 3399858           | ins               |        | G2583_3014      | hyfR      | CDS  |
| O157                 | 3332703           | ns                |        | G2583_3017      | yfgC      | CDS  |
| CB9615               | 3076460           | s                 |        | G2583_3020      | uraA      | CDS  |
| O157                 | 3338734           | ns                |        | G2583_3023      | purN      | CDS  |
| CB9615               | 3080249           | i                 |        | intergenic      |           |      |
| CB9615               | 3080310           | s                 |        | G2583_3024      | ppk       | CDS  |
| CB9615               | 3087305           | ns                |        | G2583_3029      | yfgH      | CDS  |
| CB9615               | 3091074           | s                 |        | G2583_3032      | guaB      | CDS  |
| EDL933               | 3420165           | i                 |        | intergenic      |           |      |
| O157                 | 3354039           | ns                |        | G2583_3036      | yfgL      | CDS  |
| O157                 | 3355385           | ns                |        | G2583_3037      | yfgM      | CDS  |
| CB9615               | 3098785           | ns                |        | G2583_3040      | ispG      | CDS  |
| O55/O157             | 3102696           | ns                |        | G2583_3044      | -         | CDS  |

| lineage <sup>a</sup> | site <sup>b</sup> | mutation          |        | gene       | Gene name | Type       |
|----------------------|-------------------|-------------------|--------|------------|-----------|------------|
|                      |                   | type <sup>c</sup> | recomb |            |           |            |
| O55/O157             | 3102846           | ns                |        | G2583_3044 | -         | CDS        |
| O55/O157             | 3102916           | ns                |        | G2583_3044 | -         | CDS        |
| O55/O157             | 3104750           | ns                |        | G2583_3047 | dmsA      | CDS        |
| O55/O157             | 3105262           | ns                |        | G2583_3047 | dmsA      | CDS        |
| O55/O157             | 3105533           | ns                |        | G2583_3047 | dmsA      | CDS        |
| O55/O157             | 3106970           | i                 |        | intergenic |           |            |
| CB9615               | 3113828           | ns                |        | G2583_3049 | yfhM      | CDS        |
| CB9615               | 3113869           | ns                |        | G2583_3049 | yfhM      | CDS        |
| EDL933               | 3445308           | ins               |        | G2583_3052 | sseB      | CDS        |
| CB9615               | 3119046           | ns                |        | G2583_3056 | hscA      | CDS        |
| CB9615               | 3119807           | s                 |        | G2583_3056 | hscA      | CDS        |
| CB9615               | 3119967           | ns                |        | G2583_3056 | hscA      | CDS        |
| O157                 | 3380175           | i                 |        | intergenic |           |            |
| CB9615               | 3123303           | i                 |        | intergenic |           |            |
| CB9615               | 3124446           | s                 |        | G2583_3062 | trmJ      | CDS        |
| CB9615               | 3125631           | s                 |        | G2583_3063 | suhB      | CDS        |
| O157                 | 3385418           | s                 |        | G2583_3064 | yfhR      | CDS        |
| O157                 | 3388387           | i                 |        | intergenic |           |            |
| EDL933               | 3458316           | ins               |        | intergenic |           |            |
| O157                 | 3389485           | i                 |        | intergenic |           |            |
| O157                 | 3390792           | s                 |        | G2583_3068 | hcaE      | CDS        |
| O157                 | 3391262           | s                 |        | G2583_3069 | hcaF      | CDS        |
| CB9615               | 3133865           | ns                |        | G2583_3072 | hcaD      | CDS        |
| CB9615               | 3133963           | s                 |        | G2583_3072 | hcaD      | CDS        |
| O157                 | 3395694           | ns                |        | G2583_3075 | yphC      | CDS        |
| O157                 | 3396073           | ns                |        | G2583_3075 | yphC      | CDS        |
| O157                 | 3396091           | ns                |        | G2583_3075 | yphC      | CDS        |
| O157                 | 3397051           | s                 |        | G2583_3076 | yphD      | CDS        |
| O157                 | 3397262           | ns                |        | G2583_3076 | yphD      | CDS        |
| O157                 | 3398211           | ns                |        | G2583_3077 | yphE      | CDS        |
| CB9615               | 3142104           | s                 |        | G2583_3079 | yphG      | CDS        |
| O157                 | 3401183           | s                 |        | G2583_3079 | yphG      | CDS        |
| O157                 | 3401445           | ns                |        | G2583_3079 | yphG      | CDS        |
| O157                 | 3402265           | ns                |        | G2583_3079 | yphG      | CDS        |
| CB9615               | 3143736           | s                 |        | G2583_3079 | yphG      | CDS        |
| CB9615               | 3144788           | s                 |        | G2583_3080 | yphH      | CDS        |
| O157                 | 3403834           | s                 |        | G2583_3080 | yphH      | CDS        |
| CB9615               | 3145958           | ns                |        | G2583_3081 | glyA      | CDS        |
| CB9615               | 3146660           | s                 |        | G2583_3081 | glyA      | CDS        |
| CB9615               | 3147613           | s                 |        | G2583_3082 | hmp       | CDS        |
| CB9615               | 3150181           | s                 |        | G2583_3084 | yfhA      | CDS        |
| CB9615               | 3152738           | nc                |        | G2583_3087 | -         | pseudogene |
| O157                 | 3414001           | s                 |        | G2583_3088 | purL      | CDS        |
| CB9615               | 3157425           | s                 |        | G2583_3089 | yfhD      | CDS        |
| O157                 | 3417358           | ns                |        | G2583_3089 | yfhD      | CDS        |

| lineage <sup>a</sup> | site <sup>b</sup> | mutation          |        | gene       | Gene name | Type |
|----------------------|-------------------|-------------------|--------|------------|-----------|------|
|                      |                   | type <sup>c</sup> | recomb |            |           |      |
| EDL933               | 3490196           | ins               |        | intergenic |           |      |
| O157                 | 3430702           | i                 |        | intergenic |           |      |
| O157                 | 3434492           | s                 |        | G2583_3158 | srmB      | CDS  |
| O157                 | 3436799           | i                 |        | intergenic |           |      |
| Sakai                | 3437590           | ins               |        | G2583_3162 | ung       | CDS  |
| CB9615               | 3221386           | s                 |        | G2583_3164 | -         | CDS  |
| CB9615               | 3221956           | i                 |        | intergenic |           |      |
| Sakai                | 3441546           | ins               |        | G2583_3167 | yfiQ      | CDS  |
| O157                 | 3442864           | i                 |        | intergenic |           |      |
| O157                 | 3445691           | s                 |        | G2583_3170 | kgtP      | CDS  |
| EDL933               | 3516081           | ins               |        | intergenic |           |      |
| O157                 | 3446373           | nc                |        | G2583_3171 | rrf       | rRNA |
| CB9615               | 3229212           | nc                |        | G2583_3172 | rri       | rRNA |
| EDL933               | 3517536           | ins               |        | G2583_3172 | rri       | rRNA |
| EDL933               | 3517877           | ins               |        | G2583_3172 | rri       | rRNA |
| CB9615               | 3230699           | nc                |        | G2583_3172 | rri       | rRNA |
| EDL933               | 3230699           | nc                |        | G2583_3172 | rri       | rRNA |
| Sakai                | 3448153           | nc                | rec    | G2583_3172 | rri       | rRNA |
| Sakai                | 3448157           | nc                | rec    | G2583_3172 | rri       | rRNA |
| CB9615               | 3230708           | nc                |        | G2583_3172 | rri       | rRNA |
| EDL933               | 3230708           | nc                |        | G2583_3172 | rri       | rRNA |
| Sakai                | 3448162           | nc                | rec    | G2583_3172 | rri       | rRNA |
| EDL933               | 3448735           | nc                |        | G2583_3172 | rri       | rRNA |
| O157                 | 3448735           | nc                |        | G2583_3172 | rri       | rRNA |
| Sakai                | 3448735           | nc                | rec    | G2583_3172 | rri       | rRNA |
| EDL933               | 3518669           | ins               |        | G2583_3172 | rri       | rRNA |
| EDL933               | 3518682           | ins               |        | G2583_3172 | rri       | rRNA |
| Sakai                | 3449117           | nc                | rec    | G2583_3172 | rri       | rRNA |
| EDL933               | 3519167           | ins               |        | G2583_3172 | rri       | rRNA |
| O157                 | 3449401           | ins-18            |        | intergenic |           |      |
| Sakai                | 3449416           | i                 | rec    | intergenic |           |      |
| O55/O157             | 3231947           | indel-8           |        | intergenic |           |      |
| CB9615               | 3231959           | i                 |        | intergenic |           |      |
| Sakai                | 3449652           | i                 | rec    | intergenic |           |      |
| EDL933               | 3519566           | i                 |        | intergenic |           |      |
| EDL933               | 3519567           | i                 |        | intergenic |           |      |
| EDL933               | 3520082           | nc                | rec    | G2583_3174 | rrs       | rRNA |
| EDL933               | 3520097           | nc                | rec    | G2583_3174 | rrs       | rRNA |
| EDL933               | 3520098           | nc                | rec    | G2583_3174 | rrs       | rRNA |
| EDL933               | 3520099           | nc                | rec    | G2583_3174 | rrs       | rRNA |
| EDL933               | 3520100           | nc                | rec    | G2583_3174 | rrs       | rRNA |
| EDL933               | 3520101           | nc                | rec    | G2583_3174 | rrs       | rRNA |
| EDL933               | 3520110           | nc                | rec    | G2583_3174 | rrs       | rRNA |
| EDL933               | 3520114           | nc                | rec    | G2583_3174 | rrs       | rRNA |
| EDL933               | 3520119           | ins               | rec    | G2583_3174 | rrs       | rRNA |

| lineage <sup>a</sup> | site <sup>b</sup> | mutation          |        | gene       | Gene name | Type |
|----------------------|-------------------|-------------------|--------|------------|-----------|------|
|                      |                   | type <sup>c</sup> | recomb |            |           |      |
| EDL933               | 3520356           | ins               | rec    | G2583_3174 | rrs       | rRNA |
| EDL933               | 3520424           | ins               | rec    | G2583_3174 | rrs       | rRNA |
| EDL933               | 3520532           | ins               | rec    | G2583_3174 | rrs       | rRNA |
| EDL933               | 3520725           | ins               | rec    | G2583_3174 | rrs       | rRNA |
| CB9615               | 3233603           | nc                |        | G2583_3174 | rrs       | rRNA |
| EDL933               | 3521156           | ins               |        | intergenic |           |      |
| CB9615               | 3233856           | i                 |        | intergenic |           |      |
| O157                 | 3451460           | i                 |        | intergenic |           |      |
| CB9615               | 3234003           | i                 |        | intergenic |           |      |
| O157                 | 3452810           | s                 |        | G2583_3175 | clpB      | CDS  |
| CB9615               | 3240480           | ns                |        | G2583_3181 | pheA      | CDS  |
| O157                 | 3462631           | ns                |        | G2583_3186 | yfiN      | CDS  |
| O157                 | 3464218           | ns                |        | G2583_3187 | yfiB      | CDS  |
| CB9615               | 3247118           | s                 |        | G2583_3188 | rplS      | CDS  |
| O157                 | 3466754           | s                 |        | G2583_3192 | ffh       | CDS  |
| CB9615               | 3250353           | i                 |        | intergenic |           |      |
| O157                 | 3469372           | ns                |        | G2583_3194 | yfjD      | CDS  |
| CB9615               | 3251951           | s                 |        | G2583_3194 | yfjD      | CDS  |
| O157                 | 3471077           | ns                |        | G2583_3196 | nadK      | CDS  |
| CB9615               | 3254051           | ns                |        | G2583_3196 | nadK      | CDS  |
| O157                 | 3472844           | s                 |        | G2583_3197 | recN      | CDS  |
| CB9615               | 3256022           | i                 |        | intergenic |           |      |
| O157                 | 3474160           | ns                |        | G2583_3199 | yfjF      | CDS  |
| O157                 | 3474265           | ns                |        | G2583_3199 | yfjF      | CDS  |
| O157                 | 3475410           | i                 |        | intergenic |           |      |
| CB9615               | 3258124           | i                 |        | intergenic |           |      |
| O55/O157             | 3259976           | ns                | rec    | G2583_3204 | lpgB      | CDS  |
| O55/O157             | 3259977           | ns                | rec    | G2583_3204 | lpgB      | CDS  |
| O55/O157             | 3259981           | s                 | rec    | G2583_3204 | lpgB      | CDS  |
| O55/O157             | 3259993           | ns                | rec    | G2583_3204 | lpgB      | CDS  |
| O55/O157             | 3260007           | ns                | rec    | G2583_3204 | lpgB      | CDS  |
| O55/O157             | 3260027           | ns                | rec    | G2583_3204 | lpgB      | CDS  |
| O55/O157             | 3260050           | s                 | rec    | G2583_3204 | lpgB      | CDS  |
| O55/O157             | 3260087           | ns                | rec    | G2583_3204 | lpgB      | CDS  |
| O55/O157             | 3260147           | i                 | rec    | intergenic |           |      |
| O55/O157             | 3260155           | i                 | rec    | intergenic |           |      |
| O55/O157             | 3260198           | indel             | rec    | intergenic |           |      |
| O55/O157             | 3260205           | i                 | rec    | intergenic |           |      |
| O55/O157             | 3260235           | i                 | rec    | intergenic |           |      |
| O55/O157             | 3260243           | i                 | rec    | intergenic |           |      |
| O55/O157             | 3260320           | s                 | rec    | G2583_3205 | -         | CDS  |
| O55/O157             | 3260362           | s                 | rec    | G2583_3205 | -         | CDS  |
| O55/O157             | 3260375           | ns                | rec    | G2583_3205 | -         | CDS  |
| O55/O157             | 3260460           | ns                | rec    | G2583_3205 | -         | CDS  |
| O55/O157             | 3260513           | ns                | rec    | G2583_3205 | -         | CDS  |



| lineage <sup>a</sup> | site <sup>b</sup> | mutation          |        | gene       | Gene name | Type       |
|----------------------|-------------------|-------------------|--------|------------|-----------|------------|
|                      |                   | type <sup>c</sup> | recomb |            |           |            |
| O55/O157             | 3260605           | s                 | rec    | G2583_3205 | -         | CDS        |
| O55/O157             | 3260626           | s                 | rec    | G2583_3205 | -         | CDS        |
| O55/O157             | 3260813           | indel             | rec    | G2583_3205 | -         | CDS        |
| O55/O157             | 3260816           | ns                | rec    | G2583_3205 | -         | CDS        |
| O55/O157             | 3260919           | i                 | rec    | intergenic |           |            |
| O55/O157             | 3260949           | i                 | rec    | intergenic |           |            |
| O55/O157             | 3260967           | indel-4           | rec    | intergenic |           |            |
| O55/O157             | 3261009           | i                 | rec    | intergenic |           |            |
| O55/O157             | 3261021           | nc                | rec    | G2583_3206 | -         | pseudogene |
| O55/O157             | 3261088           | nc                | rec    | G2583_3206 | -         | pseudogene |
| O55/O157             | 3261102           | nc                | rec    | G2583_3206 | -         | pseudogene |
| O55/O157             | 3261240           | nc                | rec    | G2583_3206 | -         | pseudogene |
| O55/O157             | 3261308           | nc                | rec    | G2583_3206 | -         | pseudogene |
| O55/O157             | 3261349           | nc                | rec    | G2583_3206 | -         | pseudogene |
| O55/O157             | 3261416           | nc                | rec    | G2583_3206 | -         | pseudogene |
| O55/O157             | 3261435           | nc                | rec    | G2583_3206 | -         | pseudogene |
| O55/O157             | 3261442           | nc                | rec    | G2583_3206 | -         | pseudogene |
| O55/O157             | 3261454           | nc                | rec    | G2583_3206 | -         | pseudogene |
| O55/O157             | 3261459           | nc                | rec    | G2583_3206 | -         | pseudogene |
| O55/O157             | 3261465           | nc                | rec    | G2583_3206 | -         | pseudogene |
| O55/O157             | 3261472           | nc                | rec    | G2583_3206 | -         | pseudogene |
| O55/O157             | 3261476           | nc                | rec    | G2583_3206 | -         | pseudogene |
| O55/O157             | 3261479           | nc                | rec    | G2583_3206 | -         | pseudogene |
| O55/O157             | 3261483           | nc                | rec    | G2583_3206 | -         | pseudogene |
| O55/O157             | 3261486           | nc                | rec    | G2583_3206 | -         | pseudogene |
| O55/O157             | 3261495           | nc                | rec    | G2583_3206 | -         | pseudogene |
| O55/O157             | 3261516           | nc                | rec    | G2583_3206 | -         | pseudogene |
| O55/O157             | 3261529           | nc                | rec    | G2583_3206 | -         | pseudogene |
| O55/O157             | 3261532           | indel-3           | rec    | G2583_3206 | -         | CDS        |
| O55/O157             | 3261545           | nc                | rec    | G2583_3206 | -         | pseudogene |
| O55/O157             | 3261565           | nc                | rec    | G2583_3206 | -         | pseudogene |
| O55/O157             | 3261572           | nc                | rec    | G2583_3206 | -         | pseudogene |
| O55/O157             | 3261596           | nc                | rec    | G2583_3206 | -         | pseudogene |
| O55/O157             | 3261627           | nc                | rec    | G2583_3206 | -         | pseudogene |
| Sakai                | 3484256           | ns                | rec    | G2583_3242 | -         | CDS        |
| Sakai                | 3484260           | ns                | rec    | G2583_3242 | -         | CDS        |
| EDL933               | 3551606           | ns                |        | G2583_3242 | -         | CDS        |
| O55/O157             | 3292159           | ns                | rec    | G2583_3242 | -         | CDS        |
| Sakai                | 3484362           | ns                | rec    | G2583_3242 | -         | CDS        |
| O55/O157             | 3292221           | ns                | rec    | G2583_3242 | -         | CDS        |
| EDL933               | 3551743           | ns                |        | G2583_3242 | -         | CDS        |
| O55/O157             | 3292596           | ns                | rec    | G2583_3242 | -         | CDS        |
| EDL933               | 3552289           | ins               |        | G2583_3242 | -         | CDS        |
| Sakai                | 3484989           | ns                | rec    | G2583_3242 | -         | CDS        |
| O55/O157             | 3293060           | s                 | rec    | G2583_3242 | -         | CDS        |

| lineage <sup>a</sup> | site <sup>b</sup> | mutation          |        | gene       | Gene name | Type       |
|----------------------|-------------------|-------------------|--------|------------|-----------|------------|
|                      |                   | type <sup>c</sup> | recomb |            |           |            |
| O55/O157             | 3293072           | s                 | rec    | G2583_3242 | -         | CDS        |
| O55/O157             | 3293116           | ns                | rec    | G2583_3242 | -         | CDS        |
| O55/O157             | 3293118           | ns                | rec    | G2583_3242 | -         | CDS        |
| O55/O157             | 3293135           | s                 | rec    | G2583_3242 | -         | CDS        |
| O55/O157             | 3293153           | ns                | rec    | G2583_3242 | -         | CDS        |
| O55/O157             | 3293155           | ns                | rec    | G2583_3242 | -         | CDS        |
| O55/O157             | 3293174           | ns                | rec    | G2583_3242 | -         | CDS        |
| O55/O157             | 3293175           | ns                | rec    | G2583_3242 | -         | CDS        |
| O55/O157             | 3293176           | ns                | rec    | G2583_3242 | -         | CDS        |
| O55/O157             | 3293212           | ns                | rec    | G2583_3242 | -         | CDS        |
| O157                 | 3485969           | ns                |        | G2583_3242 | -         | CDS        |
| Sakai                | 3490148           | ns                | rec    | ECs3504    | -         | CDS        |
| Sakai                | 3490449           | del-6             | rec    | intergenic |           |            |
| Sakai                | 3491733           | ns                | rec    | G2583_3291 | -         | CDS        |
| Sakai                | 3491734           | ns                | rec    | G2583_3291 | -         | CDS        |
| O55/O157             | 3329609           | ns                |        | G2583_3291 | -         | CDS        |
| EDL933               | 3559317           | ins               |        | G2583_3291 | -         | CDS        |
| EDL933               | 3559344           | ins               |        | G2583_3291 | -         | CDS        |
| O55/O157             | 3330853           | i                 |        | intergenic |           |            |
| EDL933               | 3560499           | ins               |        | intergenic |           |            |
| O55/O157             | 3331099           | ns                |        | G2583_3292 | -         | CDS        |
| EDL933               | 3561379           | ins               |        | G2583_3293 | -         | CDS        |
| EDL933               | 3561587           | ins               |        | G2583_3294 | -         | CDS        |
| EDL933               | 3561786           | ins               |        | G2583_3294 | -         | CDS        |
| O55/O157             | 3332519           | ns                |        | G2583_3294 | -         | CDS        |
| O55/O157             | 3332606           | ns                |        | G2583_3294 | -         | CDS        |
| O55/O157             | 3332674           | ns                |        | G2583_3294 | -         | CDS        |
| O55/O157             | 3334462           | ns                |        | G2583_3295 | -         | CDS        |
| O55/O157             | 3334651           | ns                |        | G2583_3295 | -         | CDS        |
| O55/O157             | 3334724           | s                 |        | G2583_3295 | -         | CDS        |
| EDL933               | 3564608           | ins-2             |        | G2583_3296 | -         | CDS        |
| EDL933               | 3564684           | ins               |        | G2583_3296 | -         | CDS        |
| O55/O157             | 3336184           | i                 |        | intergenic |           |            |
| O55/O157             | 3336522           | ns                |        | G2583_3297 | alpA      | CDS        |
| O55/O157             | 3337895           | indel             |        | intergenic |           |            |
| CB9615               | 3339057           | ins-12            |        | G2583_3299 | ypjA      | pseudogene |
| CB9615               | 3339874           | del               |        | G2583_3299 | ypjA      | pseudogene |
| CB9615               | 3340946           | nc                |        | G2583_3299 | ypjA      | pseudogene |
| O157                 | 3506470           | s                 |        | G2583_3301 | ypjB      | CDS        |
| CB9615               | 3344441           | ns                |        | G2583_3301 | ypjB      | CDS        |
| CB9615               | 3345494           | ns                |        | G2583_3302 | -         | CDS        |
| CB9615               | 3345979           | i                 |        | intergenic |           |            |
| CB9615               | 3346865           | ns                |        | G2583_3304 | ygaR      | CDS        |
| CB9615               | 3347295           | s                 |        | G2583_3304 | ygaR      | CDS        |
| O157                 | 3509803           | s                 |        | G2583_3304 | ygaR      | CDS        |

| lineage <sup>a</sup> | site <sup>b</sup> | mutation          |        | gene       | Gene name | Type |
|----------------------|-------------------|-------------------|--------|------------|-----------|------|
|                      |                   | type <sup>c</sup> | recomb |            |           |      |
| O157                 | 3509804           | ns                |        | G2583_3304 | ygaR      | CDS  |
| O157                 | 3509819           | ns                |        | G2583_3304 | ygaR      | CDS  |
| O157                 | 3510176           | ns                |        | G2583_3304 | ygaR      | CDS  |
| CB9615               | 3348697           | i                 |        | intergenic |           |      |
| O157                 | 3511047           | i                 |        | intergenic |           |      |
| O157                 | 3511215           | ns                |        | G2583_3305 | csiD      | CDS  |
| CB9615               | 3350871           | ns                |        | G2583_3306 | ygaF      | CDS  |
| O157                 | 3519014           | i                 |        | intergenic |           |      |
| O157                 | 3519241           | i                 |        | intergenic |           |      |
| CB9615               | 3357112           | i                 |        | intergenic |           |      |
| O157                 | 3519880           | ns                |        | G2583_3314 | ygaP      | CDS  |
| CB9615               | 3358865           | i                 |        | intergenic |           |      |
| CB9615               | 3358907           | i                 |        | intergenic |           |      |
| CB9615               | 3359030           | i                 |        | intergenic |           |      |
| CB9615               | 3360359           | ns                |        | G2583_3318 | ygaM      | CDS  |
| CB9615               | 3360519           | i                 |        | intergenic |           |      |
| CB9615               | 3361222           | ns                |        | G2583_3319 | -         | CDS  |
| CB9615               | 3366030           | ns                |        | G2583_3324 | nrdF      | CDS  |
| O157                 | 3528591           | ns                |        | G2583_3324 | nrdF      | CDS  |
| O157                 | 3529453           | ns                |        | G2583_3325 | proV      | CDS  |
| O157                 | 3529723           | ns                |        | G2583_3325 | proV      | CDS  |
| O157                 | 3533864           | s                 |        | G2583_3329 | ygaZ      | CDS  |
| CB9615               | 3374376           | ns                |        | G2583_3332 | emrA      | CDS  |
| EDL933               | 3606613           | s                 |        | G2583_3336 | gshA      | CDS  |
| CB9615               | 3377564           | ns                |        | G2583_3336 | gshA      | CDS  |
| CB9615               | 3377805           | s                 |        | G2583_3336 | gshA      | CDS  |
| O157                 | 3541678           | i                 |        | intergenic |           |      |
| CB9615               | 3379643           | i                 |        | intergenic |           |      |
| EDL933               | 3609798           | ins               |        | G2583_3343 | -         | tRNA |
| EDL933               | 3610668           | ins               |        | G2583_3345 | alaS      | CDS  |
| CB9615               | 3381806           | s                 |        | G2583_3345 | alaS      | CDS  |
| O157                 | 3544256           | s                 |        | G2583_3345 | alaS      | CDS  |
| EDL933               | 3614571           | ns                |        | G2583_3347 | recA      | CDS  |
| CB9615               | 3385787           | s                 |        | G2583_3348 | ygaD      | CDS  |
| Sakai                | 3549660           | del-5             |        | intergenic |           |      |
| CB9615               | 3387429           | i                 |        | intergenic |           |      |
| CB9615               | 3387453           | i                 |        | intergenic |           |      |
| O157                 | 3550124           | del               |        | G2583_3350 | srIA      | CDS  |
| O157                 | 3550404           | ins-2             |        | G2583_3351 | srIE      | CDS  |
| EDL933               | 3620383           | ins               |        | G2583_3355 | srIR      | CDS  |
| O157                 | 3557741           | s                 |        | G2583_3359 | norW      | CDS  |
| CB9615               | 3399544           | ns                |        | G2583_3361 | hydN      | CDS  |
| CB9615               | 3401015           | i                 |        | intergenic |           |      |
| CB9615               | 3401096           | i                 |        | intergenic |           |      |
| CB9615               | 3402118           | s                 |        | G2583_3363 | ascF      | CDS  |

| lineage <sup>a</sup> | site <sup>b</sup> | mutation          |        | gene       | Gene name | Type |
|----------------------|-------------------|-------------------|--------|------------|-----------|------|
|                      |                   | type <sup>c</sup> | recomb |            |           |      |
| O157                 | 3564998           | ns                |        | G2583_3364 | ascB      | CDS  |
| O157                 | 3565101           | s                 |        | G2583_3364 | ascB      | CDS  |
| CB9615               | 3403539           | s                 |        | G2583_3364 | ascB      | CDS  |
| CB9615               | 3403798           | ns                |        | G2583_3364 | ascB      | CDS  |
| O157                 | 3570574           | s                 |        | G2583_3370 | hycD      | CDS  |
| CB9615               | 3408904           | s                 |        | G2583_3370 | hycD      | CDS  |
| EDL933               | 3638477           | ns                |        | G2583_3371 | hycC      | CDS  |
| CB9615               | 3409557           | ns                |        | G2583_3371 | hycC      | CDS  |
| CB9615               | 3411487           | i                 |        | intergenic |           |      |
| O157                 | 3574988           | ns                |        | G2583_3376 | hypB      | CDS  |
| O157                 | 3576088           | ns                |        | G2583_3378 | hypD      | CDS  |
| O157                 | 3577400           | ns                |        | G2583_3379 | hypE      | CDS  |
| O157                 | 3577442           | ns                |        | G2583_3379 | hypE      | CDS  |
| CB9615               | 3422941           | ns                |        | G2583_3386 | kpdC      | CDS  |
| O157                 | 3586076           | s                 |        | G2583_3387 | padI      | CDS  |
| O157                 | 3586558           | ns                |        | G2583_3388 | -         | CDS  |
| O157                 | 3587532           | s                 |        | G2583_3389 | rpoS      | CDS  |
| EDL933               | 3655312           | ns                |        | G2583_3389 | rpoS      | CDS  |
| EDL933               | 3655316           | ns                |        | G2583_3389 | rpoS      | CDS  |
| O157                 | 3588380           | s                 |        | G2583_3390 | nlpD      | CDS  |
| CB9615               | 3429411           | s                 |        | G2583_3393 | truD      | CDS  |
| O157                 | 3592455           | ns                |        | G2583_3395 | ispD      | CDS  |
| O157                 | 3595801           | s                 |        | G2583_3399 | cysN      | CDS  |
| O157                 | 3596582           | ns                |        | G2583_3400 | cysD      | CDS  |
| O157                 | 3598937           | ns                |        | G2583_3403 | ygbT      | CDS  |
| CB9615               | 3437303           | ns                |        | G2583_3403 | ygbT      | CDS  |
| CB9615               | 3438424           | s                 |        | G2583_3405 | ygcI      | CDS  |
| O157                 | 3601712           | s                 |        | G2583_3406 | ygcJ      | CDS  |
| O157                 | 3602384           | ns                |        | G2583_3407 | cse       | CDS  |
| CB9615               | 3440341           | s                 |        | G2583_3407 | cse       | CDS  |
| O157                 | 3604022           | ns                |        | G2583_3408 | ygcL      | CDS  |
| CB9615               | 3443601           | ns                |        | G2583_3409 | ygcB      | CDS  |
| O157                 | 3607226           | i                 |        | intergenic |           |      |
| CB9615               | 3446825           | ns                |        | G2583_3413 | cysI      | CDS  |
| O157                 | 3609450           | s                 |        | G2583_3413 | cysI      | CDS  |
| CB9615               | 3452155           | ns                |        | G2583_3417 | ygcO      | CDS  |
| O157                 | 3616969           | del               |        | G2583_3421 | ygcS      | CDS  |
| CB9615               | 3455322           | ns                |        | G2583_3421 | ygcS      | CDS  |
| CB9615               | 3455764           | s                 |        | G2583_3421 | ygcS      | CDS  |
| CB9615               | 3456041           | ns                |        | G2583_3422 | ygcU      | CDS  |
| CB9615               | 3457182           | ns                |        | G2583_3422 | ygcU      | CDS  |
| CB9615               | 3457645           | ns                |        | G2583_3423 | ygcW      | CDS  |
| CB9615               | 3459792           | ns                |        | G2583_3424 | yqcE      | CDS  |
| O157                 | 3621850           | i                 |        | intergenic |           |      |
| O157                 | 3622700           | ns                |        | G2583_3425 | ygcE      | CDS  |

| lineage <sup>a</sup> | site <sup>b</sup> | mutation          |        | gene       | Gene name | Type |
|----------------------|-------------------|-------------------|--------|------------|-----------|------|
|                      |                   | type <sup>c</sup> | recomb |            |           |      |
| CB9615               | 3461846           | i                 |        | intergenic |           |      |
| O157                 | 3623898           | del-2             |        | intergenic |           |      |
| CB9615               | 3461916           | i                 |        | intergenic |           |      |
| O157                 | 3626293           | s                 |        | G2583_3428 | -         | CDS  |
| CB9615               | 3464730           | s                 |        | G2583_3428 | -         | CDS  |
| O157                 | 3626688           | ns                |        | G2583_3428 | -         | CDS  |
| CB9615               | 3468885           | ns                |        | G2583_3432 | pyrG      | CDS  |
| Sakai                | 3637135           | ns                |        | G2583_3437 | rumA      | CDS  |
| CB9615               | 3480539           | ns                |        | G2583_3440 | gudX      | CDS  |
| O157                 | 3642927           | ns                |        | G2583_3440 | gudX      | CDS  |
| O157                 | 3643158           | ns                |        | G2583_3441 | gudP      | CDS  |
| CB9615               | 3481664           | ns                |        | G2583_3441 | gudP      | CDS  |
| O157                 | 3645412           | ns                |        | G2583_3443 | truC      | CDS  |
| CB9615               | 3485893           | ns                |        | G2583_3447 | queF      | CDS  |
| CB9615               | 3487207           | s                 |        | G2583_3448 | ygdH      | CDS  |
| O157                 | 3656572           | i                 |        | intergenic |           |      |
| O157                 | 3659882           | s                 |        | G2583_3456 | fucK      | CDS  |
| O157                 | 3661237           | ns                |        | G2583_3456 | fucK      | CDS  |
| CB9615               | 3501682           | del               |        | intergenic |           |      |
| O157                 | 3667951           | ns                |        | G2583_3466 | ygdL      | CDS  |
| CB9615               | 3507805           | s                 |        | G2583_3467 | mltA      | CDS  |
| O157                 | 3674715           | s                 |        | G2583_3473 | recD      | CDS  |
| O157                 | 3675231           | ns                |        | G2583_3474 | recB      | CDS  |
| O157                 | 3676423           | ns                |        | G2583_3474 | recB      | CDS  |
| O157                 | 3676880           | s                 |        | G2583_3474 | recB      | CDS  |
| O157                 | 3677574           | ns                |        | G2583_3474 | recB      | CDS  |
| O157                 | 3678664           | ns                |        | G2583_3475 | ptrA      | CDS  |
| CB9615               | 3517207           | s                 |        | G2583_3475 | ptrA      | CDS  |
| CB9615               | 3517947           | ns                |        | G2583_3475 | ptrA      | CDS  |
| O157                 | 3680760           | s                 |        | G2583_3475 | ptrA      | CDS  |
| O157                 | 3681585           | ns                |        | G2583_3476 | recC      | CDS  |
| O157                 | 3684014           | ns                |        | G2583_3476 | recC      | CDS  |
| O157                 | 3684856           | s                 |        | G2583_3477 | ppdC      | CDS  |
| O157                 | 3690295           | s                 |        | G2583_3483 | ptsP      | CDS  |
| O157                 | 3694856           | ns                |        | G2583_3489 | tas       | CDS  |
| CB9615               | 3535080           | ns                |        | G2583_3491 | aas       | CDS  |
| CB9615               | 3535667           | ns                |        | G2583_3491 | aas       | CDS  |
| EDL933               | 3766085           | ins               |        | intergenic |           |      |
| O157                 | 3700229           | ns                |        | G2583_3495 | lysA      | CDS  |
| CB9615               | 3538874           | ns                |        | G2583_3495 | lysA      | CDS  |
| O157                 | 3700922           | ns                |        | G2583_3495 | lysA      | CDS  |
| CB9615               | 3539965           | s                 |        | G2583_3496 | lysR      | CDS  |
| O157                 | 3706765           | i                 |        | intergenic |           |      |
| CB9615               | 3547870           | i                 |        | intergenic |           |      |
| O157                 | 3710057           | ns                |        | G2583_3503 | yqeH      | CDS  |

| lineage <sup>a</sup> | site <sup>b</sup> | mutation          |        | gene            | Gene name | Type       |
|----------------------|-------------------|-------------------|--------|-----------------|-----------|------------|
|                      |                   | type <sup>c</sup> | recomb |                 |           |            |
| O157                 | 3711187           | s                 |        | G2583_3504      | yqeI      | CDS        |
| O157                 | 3711725           | ins               |        | G2583_3505      | yqeJ      | CDS        |
| O157                 | 3712943           | ns                |        | G2583_3507      | -         | CDS        |
| EDL933               | 3781741           | ins               |        | intergenic      |           |            |
| EDL933               | 3784341           | ns                |        | ECs3711         | -         | CDS        |
| EDL933               | 3787702           | ins               |        | ECs3718         | -         | CDS        |
| EDL933               | 3787760           | ins               |        | ECs3718         | -         | CDS        |
| EDL933               | 3787779           | ins               |        | ECs3718         | -         | CDS        |
| EDL933               | 3787815           | ins               |        | ECs3718         | -         | CDS        |
| EDL933               | 3787871           | ins               |        | ECs3719         | -         | CDS        |
| EDL933               | 3788848           | i                 |        | intergenic      |           |            |
| O157                 | 3729082           | ns                |        | G2583_3510-3511 | -         | CDS        |
| CB9615               | 3553579           | ns                |        | G2583_3512      | EivA      | CDS        |
| CB9615               | 3553801           | ns                |        | G2583_3512      | EivA      | CDS        |
| CB9615               | 3555318           | del-7             |        | G2583_3513      | EivE      | CDS        |
| CB9615               | 3555319           | ns                | rec    | G2583_3513      | EivE      | CDS        |
| CB9615               | 3555320           | s                 | rec    | G2583_3513      | EivE      | CDS        |
| CB9615               | 3555325           | ns                | rec    | G2583_3513      | EivE      | CDS        |
| CB9615               | 3555327           | ns                | rec    | G2583_3513      | EivE      | CDS        |
| CB9615               | 3555421           | ns                |        | G2583_3513      | EivE      | CDS        |
| CB9615               | 3555639           | ns                |        | G2583_3513      | EivE      | CDS        |
| O157                 | 3732315           | ns                |        | G2583_3513      | EivE      | CDS        |
| CB9615               | 3556461           | s                 |        | G2583_3514      | EivG      | CDS        |
| CB9615               | 3558046           | ns                |        | G2583_3514      | EivG      | CDS        |
| O157                 | 3734395           | ns                |        | G2583_3515      | invF      | CDS        |
| CB9615               | 3559935           | del               |        | G2583_3517      | -         | pseudogene |
| O157                 | 3736522           | del-5             |        | G2583_3517      | -         | pseudogene |
| EDL933               | 3804912           | ins               |        | G2583_3519      | ygeR      | CDS        |
| O157                 | 3738559           | i                 |        | intergenic      |           |            |
| O157                 | 3739042           | ns                |        | G2583_3520      | xdhA      | CDS        |
| O157                 | 3739366           | ns                |        | G2583_3520      | xdhA      | CDS        |
| CB9615               | 3563791           | ns                |        | G2583_3520      | xdhA      | CDS        |
| O157                 | 3739828           | ns                |        | G2583_3520      | xdhA      | CDS        |
| CB9615               | 3565245           | s                 |        | G2583_3521      | xdhB      | CDS        |
| O157                 | 3741887           | ns                |        | G2583_3522      | xdhC      | CDS        |
| O157                 | 3741927           | s                 |        | G2583_3522      | xdhC      | CDS        |
| O157                 | 3743928           | ns                |        | G2583_3523      | ygeV      | CDS        |
| O157                 | 3743999           | ns                |        | G2583_3523      | ygeV      | CDS        |
| O157                 | 3744290           | i                 |        | intergenic      |           |            |
| CB9615               | 3568681           | ns                |        | G2583_3524      | ygeW      | CDS        |
| Sakai                | 3744736           | s                 |        | G2583_3524      | ygeW      | CDS        |
| CB9615               | 3576801           | ns                |        | G2583_3530      | yqeC      | CDS        |
| Sakai                | 3752833           | ns                |        | G2583_3530      | yqeC      | CDS        |
| EDL933               | 3821432           | ins               |        | intergenic      |           |            |
| EDL933               | 3821482           | ins               |        | intergenic      |           |            |

| lineage <sup>a</sup> | site <sup>b</sup> | mutation          |        | gene       | Gene name | Type |
|----------------------|-------------------|-------------------|--------|------------|-----------|------|
|                      |                   | type <sup>c</sup> | recomb |            |           |      |
| CB9615               | 3579827           | ns                |        | G2583_3532 | ygfK      | CDS  |
| O157                 | 3757549           | ns                |        | G2583_3533 | ssnA      | CDS  |
| CB9615               | 3587846           | ns                |        | G2583_3536 | ygfO      | CDS  |
| O157                 | 3767078           | ns                |        | G2583_3539 | ygfS      | CDS  |
| CB9615               | 3591256           | s                 |        | G2583_3540 | ygfT      | CDS  |
| O157                 | 3769367           | i                 |        | intergenic |           |      |
| O157                 | 3769926           | ns                |        | G2583_3541 | ygfU      | CDS  |
| O157                 | 3772260           | ns                |        | G2583_3543 | lysS      | CDS  |
| O157                 | 3774902           | s                 |        | G2583_3545 | recJ      | CDS  |
| O157                 | 3777224           | ns                |        | G2583_3547 | xerD      | CDS  |
| O157                 | 3777482           | s                 |        | G2583_3547 | xerD      | CDS  |
| CB9615               | 3603794           | ns                |        | G2583_3551 | ygfZ      | CDS  |
| CB9615               | 3604302           | s                 |        | G2583_3551 | ygfZ      | CDS  |
| CB9615               | 3606795           | ns                |        | G2583_3554 | bglA      | CDS  |
| O157                 | 3783456           | s                 |        | G2583_3555 | gcvP      | CDS  |
| CB9615               | 3607726           | ns                |        | G2583_3555 | gcvP      | CDS  |
| O157                 | 3786417           | s                 |        | G2583_3556 | gcvH      | CDS  |
| O157                 | 3787155           | ns                |        | G2583_3557 | gcvT      | CDS  |
| O157                 | 3787680           | ns                |        | G2583_3557 | gcvT      | CDS  |
| O157                 | 3788978           | s                 |        | G2583_3558 | visC      | CDS  |
| O157                 | 3792372           | s                 |        | G2583_3561 | ygfB      | CDS  |
| CB9615               | 3618675           | i                 |        | intergenic |           |      |
| O157                 | 3796111           | i                 |        | intergenic |           |      |
| CB9615               | 3620119           | i                 |        | intergenic |           |      |
| O157                 | 3797071           | i                 |        | intergenic |           |      |
| O157                 | 3798707           | ns                |        | G2583_3571 | scpA      | CDS  |
| O157                 | 3800106           | ns                |        | G2583_3571 | scpA      | CDS  |
| O157                 | 3800518           | ns                |        | G2583_3572 | argK      | CDS  |
| Sakai                | 3800637           | ns                |        | G2583_3572 | argK      | CDS  |
| O157                 | 3803527           | ns                |        | G2583_3574 | scpC      | CDS  |
| O157                 | 3805598           | i                 |        | intergenic |           |      |
| O157                 | 3805904           | s                 |        | G2583_3577 | argO      | CDS  |
| O157                 | 3809571           | s                 |        | G2583_3580 | pgk       | CDS  |
| CB9615               | 3637022           | s                 |        | G2583_3584 | -         | CDS  |
| CB9615               | 3637038           | ns                |        | G2583_3584 | -         | CDS  |
| CB9615               | 3638234           | ns                |        | G2583_3586 | -         | CDS  |
| CB9615               | 3639104           | s                 |        | G2583_3587 | yggC      | CDS  |
| CB9615               | 3639118           | ns                |        | G2583_3587 | yggC      | CDS  |
| O157                 | 3815794           | ns                |        | G2583_3588 | yggD      | CDS  |
| CB9615               | 3640947           | s                 |        | G2583_3590 | yggP      | CDS  |
| CB9615               | 3640959           | s                 |        | G2583_3590 | yggP      | CDS  |
| O157                 | 3817060           | s                 |        | G2583_3590 | yggP      | CDS  |
| O157                 | 3820158           | i                 |        | intergenic |           |      |
| O157                 | 3820933           | s                 |        | G2583_3593 | tktA      | CDS  |
| O157                 | 3824349           | s                 |        | G2583_3595 | speB      | CDS  |

| lineage <sup>a</sup> | site <sup>b</sup> | mutation          |        | gene       | Gene name | Type       |
|----------------------|-------------------|-------------------|--------|------------|-----------|------------|
|                      |                   | type <sup>c</sup> | recomb |            |           |            |
| O157                 | 3826627           | s                 |        | G2583_3597 | speA      | CDS        |
| CB9615               | 3651252           | s                 |        | G2583_3597 | speA      | CDS        |
| O157                 | 3829681           | i                 |        | intergenic |           |            |
| O157                 | 3829808           | ns                |        | G2583_3602 | galP      | CDS        |
| O157                 | 3830235           | s                 |        | G2583_3602 | galP      | CDS        |
| CB9615               | 3654811           | ns                |        | G2583_3602 | galP      | CDS        |
| O157                 | 3831481           | s                 |        | G2583_3603 | yggI      | CDS        |
| O157                 | 3831641           | ns                |        | G2583_3603 | yggI      | CDS        |
| CB9615               | 3656287           | s                 |        | G2583_3604 | endA      | CDS        |
| EDL933               | 3902787           | ins               |        | intergenic |           |            |
| EDL933               | 3902857           | ins               |        | intergenic |           |            |
| EDL933               | 3902862           | ins               |        | intergenic |           |            |
| EDL933               | 3902864           | ins               |        | intergenic |           |            |
| O157                 | 3840793           | ns                |        | G2583_3615 | yggM      | CDS        |
| CB9615               | 3670729           | ns                |        | G2583_3622 | mltC      | CDS        |
| O157                 | 3848246           | s                 |        | G2583_3623 | nupG      | CDS        |
| O157                 | 3848435           | s                 |        | G2583_3623 | nupG      | CDS        |
| CB9615               | 3672686           | s                 |        | G2583_3624 | speC      | CDS        |
| CB9615               | 3673035           | ns                |        | G2583_3624 | speC      | CDS        |
| EDL933               | 3921252           | ns                |        | G2583_3628 | -         | CDS        |
| O157                 | 3854773           | s                 | rec    | G2583_3629 | ISSfI4    | CDS        |
| O157                 | 3854777           | ns                | rec    | G2583_3629 | ISSfI4    | CDS        |
| O157                 | 3854780           | s                 | rec    | G2583_3629 | ISSfI4    | CDS        |
| O157                 | 3854781           | s                 | rec    | G2583_3629 | ISSfI4    | CDS        |
| O157                 | 3854788           | s                 | rec    | G2583_3629 | ISSfI4    | CDS        |
| O157                 | 3854800           | s                 | rec    | G2583_3629 | ISSfI4    | CDS        |
| O157                 | 3854801           | ns                | rec    | G2583_3629 | ISSfI4    | CDS        |
| O157                 | 3854804           | s                 | rec    | G2583_3629 | ISSfI4    | CDS        |
| O157                 | 3854806           | s                 | rec    | G2583_3629 | ISSfI4    | CDS        |
| O157                 | 3854811           | ns                | rec    | G2583_3629 | ISSfI4    | CDS        |
| O157                 | 3854812           | ns                | rec    | G2583_3629 | ISSfI4    | CDS        |
| O157                 | 3854815           | s                 | rec    | G2583_3629 | ISSfI4    | CDS        |
| CB9615               | 3678824           | s                 |        | G2583_3629 | ISSfI4    | CDS        |
| O157                 | 3855548           | ns                |        | G2583_3631 | ISSfI4    | CDS        |
| O157                 | 3855919           | s                 |        | G2583_3631 | ISSfI4    | CDS        |
| CB9615               | 3682316           | ins               |        | G2583_3633 | PagC      | CDS        |
| EDL933               | 3926642           | ins               |        | G2583_3635 | -         | pseudogene |
| O157                 | 3859844           | nc                |        | G2583_3635 | -         | pseudogene |
| CB9615               | 3684322           | nc                |        | G2583_3635 | -         | pseudogene |
| O157                 | 3862467           | ns                |        | G2583_3637 | ospD      | CDS        |
| CB9615               | 3687827           | nc                |        | G2583_3638 | -         | pseudogene |
| CB9615               | 3688151           | nc                |        | G2583_3638 | -         | pseudogene |
| O157                 | 3864589           | nc                |        | G2583_3638 | -         | pseudogene |
| CB9615               | 3690706           | i                 |        | intergenic |           |            |
| O157                 | 3867936           | ns                |        | G2583_3641 | -         | CDS        |



| lineage <sup>a</sup> | site <sup>b</sup> | mutation          |        | gene       | Gene name | Type |
|----------------------|-------------------|-------------------|--------|------------|-----------|------|
|                      |                   | type <sup>c</sup> | recomb |            |           |      |
| EDL933               | 3935780           | ns                |        | G2583_3641 | -         | CDS  |
| O157                 | 3868500           | del               |        | G2583_3641 | -         | CDS  |
| EDL933               | 3937956           | ns                |        | ECs3864    | -         | CDS  |
| Sakai                | 3871025           | ns                |        | ECs3865    | -         | CDS  |
| O157                 | 3874355           | ns                |        | G2583_3645 | -         | CDS  |
| CB9615               | 3703890           | ns                |        | G2583_3646 | -         | CDS  |
| EDL933               | 3942531           | i                 |        | intergenic |           |      |
| CB9615               | 3765449           | s                 |        | G2583_3713 | pitB      | CDS  |
| CB9615               | 3766955           | ns                |        | G2583_3714 | gsp       | CDS  |
| CB9615               | 3767789           | ns                |        | G2583_3714 | gsp       | CDS  |
| CB9615               | 3768550           | ns                |        | G2583_3714 | gsp       | CDS  |
| O157                 | 3881065           | ns                |        | G2583_3718 | hybE      | CDS  |
| CB9615               | 3772270           | ns                |        | G2583_3720 | hybC      | CDS  |
| O157                 | 3884025           | ns                |        | G2583_3721 | hybB      | CDS  |
| Sakai                | 3885057           | s                 |        | G2583_3722 | hybA      | CDS  |
| O157                 | 3890991           | i                 |        | intergenic |           |      |
| O157                 | 3891514           | s                 |        | G2583_3729 | exbD      | CDS  |
| O157                 | 3894868           | s                 |        | G2583_3734 | yqhC      | CDS  |
| O157                 | 3897228           | ns                |        | G2583_3736 | dkgA      | CDS  |
| EDL933               | 3965305           | ins               |        | intergenic |           |      |
| O157                 | 3898234           | del-4             |        | G2583_3737 | yqhG      | CDS  |
| CB9615               | 3789268           | s                 |        | G2583_3739 | ygiQ      | CDS  |
| CB9615               | 3789305           | ns                |        | G2583_3739 | ygiQ      | CDS  |
| CB9615               | 3790417           | s                 |        | G2583_3739 | ygiQ      | CDS  |
| CB9615               | 3792348           | s                 |        | G2583_3740 | sufI      | CDS  |
| O157                 | 3903293           | s                 |        | G2583_3741 | plsC      | CDS  |
| Sakai                | 3910430           | del               |        | G2583_3747 | qseC      | CDS  |
| O157                 | 3913803           | ns                |        | G2583_3751 | -         | CDS  |
| O157                 | 3914619           | s                 |        | G2583_3752 | -         | CDS  |
| O157                 | 3915743           | s                 |        | G2583_3753 | -         | CDS  |
| CB9615               | 3806129           | s                 |        | G2583_3754 | FepC      | CDS  |
| O157                 | 3917269           | i                 |        | intergenic |           |      |
| CB9615               | 3807029           | i                 |        | intergenic |           |      |
| O157                 | 3919301           | ns                |        | G2583_3755 | -         | CDS  |
| O157                 | 3922268           | s                 |        | G2583_3758 | cpdA      | CDS  |
| EDL933               | 3992087           | s                 |        | G2583_3761 | tolC      | CDS  |
| O157                 | 3925035           | ns                |        | G2583_3761 | tolC      | CDS  |
| O157                 | 3926802           | s                 |        | G2583_3764 | ygiC      | CDS  |
| O157                 | 3931151           | ns                |        | G2583_3769 | yqiC      | CDS  |
| O157                 | 3931427           | s                 |        | G2583_3770 | glgS      | CDS  |
| O157                 | 3931641           | i                 |        | intergenic |           |      |
| O157                 | 3931652           | i                 |        | intergenic |           |      |
| O157                 | 3931685           | i                 |        | intergenic |           |      |
| CB9615               | 3821791           | ns                |        | G2583_3771 | yqiJ      | CDS  |
| O157                 | 3934014           | ns                |        | G2583_3772 | yqiK      | CDS  |

| lineage <sup>a</sup> | site <sup>b</sup> | mutation          |        | gene       | Gene name | Type |
|----------------------|-------------------|-------------------|--------|------------|-----------|------|
|                      |                   | type <sup>c</sup> | recomb |            |           |      |
| CB9615               | 3825647           | ns                |        | G2583_3776 | rfaE      | CDS  |
| O157                 | 3936197           | ns                |        | G2583_3776 | rfaE      | CDS  |
| O157                 | 3937593           | ns                |        | G2583_3777 | glnE      | CDS  |
| CB9615               | 3827899           | ns                |        | G2583_3777 | glnE      | CDS  |
| O157                 | 3938599           | ns                |        | G2583_3777 | glnE      | CDS  |
| CB9615               | 3829522           | s                 |        | G2583_3778 | ygiF      | CDS  |
| O157                 | 3942169           | ns                |        | G2583_3780 | cca       | CDS  |
| O157                 | 3942753           | i                 |        | intergenic |           |      |
| CB9615               | 3834606           | i                 |        | intergenic |           |      |
| O157                 | 3949305           | ns                |        | G2583_3788 | ygjD      | CDS  |
| O157                 | 3954859           | ns                |        | G2583_3792 | mug       | CDS  |
| CB9615               | 3846017           | i                 |        | intergenic |           |      |
| O157                 | 3956835           | ns                |        | G2583_3795 | yqjI      | CDS  |
| Sakai                | 3957788           | ns                |        | G2583_3796 | aer       | CDS  |
| CB9615               | 3848892           | s                 |        | G2583_3797 | ygjG      | CDS  |
| EDL933               | 4029119           | ns                |        | G2583_3799 | ebgR      | CDS  |
| CB9615               | 3853328           | s                 |        | G2583_3800 | ebgA      | CDS  |
| O157                 | 3964851           | ns                |        | G2583_3800 | ebgA      | CDS  |
| O157                 | 3965583           | ns                |        | G2583_3801 | ebgC      | CDS  |
| O157                 | 3967442           | s                 |        | G2583_3803 | ygjJ      | CDS  |
| CB9615               | 3858887           | ns                |        | G2583_3804 | ygjK      | CDS  |
| O157                 | 3970071           | s                 |        | G2583_3804 | ygjK      | CDS  |
| CB9615               | 3860431           | s                 |        | G2583_3804 | ygjK      | CDS  |
| O157                 | 3970734           | ns                |        | G2583_3804 | ygjK      | CDS  |
| CB9615               | 3864199           | s                 |        | G2583_3808 | rlmG      | CDS  |
| CB9615               | 3865140           | ns                |        | G2583_3808 | rlmG      | CDS  |
| O157                 | 3976786           | ns                |        | G2583_3810 | ygjQ      | CDS  |
| CB9615               | 3866680           | i                 |        | intergenic |           |      |
| O157                 | 3981552           | s                 |        | G2583_3815 | uxaA      | CDS  |
| CB9615               | 3872384           | ns                |        | G2583_3815 | uxaA      | CDS  |
| O157                 | 3983286           | ns                |        | G2583_3816 | uxaC      | CDS  |
| O157                 | 3983614           | s                 |        | G2583_3816 | uxaC      | CDS  |
| EDL933               | 4051784           | ins               |        | intergenic |           |      |
| O157                 | 3991636           | ns                |        | G2583_3826 | yqjG      | CDS  |
| CB9615               | 3881607           | i                 |        | intergenic |           |      |
| O157                 | 3992419           | del               |        | intergenic |           |      |
| O157                 | 3996822           | ns                |        | G2583_3833 | yhaO      | CDS  |
| O157                 | 3997842           | i                 |        | intergenic |           |      |
| O157                 | 3997944           | s                 |        | G2583_3834 | tdcG      | CDS  |
| O157                 | 3998133           | ns                |        | G2583_3834 | tdcG      | CDS  |
| O157                 | 4000385           | ns                |        | G2583_3836 | tdcE      | CDS  |
| CB9615               | 3891826           | i                 |        | intergenic |           |      |
| CB9615               | 3892223           | s                 |        | G2583_3837 | tdcD      | CDS  |
| O157                 | 4002739           | ns                |        | G2583_3837 | tdcD      | CDS  |
| CB9615               | 3893033           | s                 |        | G2583_3837 | tdcD      | CDS  |

| lineage <sup>a</sup> | site <sup>b</sup> | mutation          |        | gene            | Gene name | Type       |
|----------------------|-------------------|-------------------|--------|-----------------|-----------|------------|
|                      |                   | type <sup>c</sup> | recomb |                 |           |            |
| CB9615               | 3893769           | s                 |        | G2583_3838      | tdcC      | CDS        |
| O157                 | 4006809           | i                 |        | intergenic      |           |            |
| O157                 | 4006837           | i                 |        | intergenic      |           |            |
| O157                 | 4007236           | i                 |        | intergenic      |           |            |
| O157                 | 4008218           | ns                |        | G2583_3843      | yhaC      | CDS        |
| EDL933               | 4075542           | ns                |        | G2583_3843      | yhaC      | CDS        |
| CB9615               | 3898133           | ns                |        | G2583_3843      | yhaC      | CDS        |
| EDL933               | 4076397           | ns                |        | G2583_3843      | yhaC      | CDS        |
| O157                 | 4009251           | i                 |        | intergenic      |           |            |
| CB9615               | 3899242           | ns                |        | G2583_3844-3845 | -         | CDS        |
| CB9615               | 3907655           | i                 |        | intergenic      |           |            |
| CB9615               | 3908041           | ns                |        | G2583_3854      | kbaZ      | CDS        |
| O157                 | 4019884           | ns                |        | G2583_3855      | agaV      | CDS        |
| CB9615               | 3910124           | ns                |        | G2583_3856      | agaW      | CDS        |
| O157                 | 4025196           | s                 |        | G2583_3861      | kbaY      | CDS        |
| O157                 | 4026246           | ns                |        | G2583_3863      | agaC      | CDS        |
| CB9615               | 3916856           | ns                |        | G2583_3864      | agaD      | CDS        |
| CB9615               | 3917600           | ins               |        | G2583_3865      | agal      | pseudogene |
| O157                 | 4032948           | ns                |        | G2583_3869      | -         | CDS        |
| CB9615               | 3924525           | i                 |        | intergenic      |           |            |
| O157                 | 4040274           | s                 |        | G2583_3875      | yraQ      | CDS        |
| CB9615               | 3930061           | ns                |        | G2583_3876      | yraR      | CDS        |
| O157                 | 4042722           | ns                |        | G2583_3879      | yhbQ      | CDS        |
| O157                 | 4046817           | ns                |        | G2583_3884      | yhbW      | CDS        |
| CB9615               | 3935603           | s                 |        | G2583_3884      | yhbW      | CDS        |
| CB9615               | 3936139           | s                 |        | G2583_3885      | mtr       | CDS        |
| O157                 | 4047846           | s                 |        | G2583_3885      | mtr       | CDS        |
| CB9615               | 3941892           | s                 |        | G2583_3888      | pnp       | CDS        |
| O157                 | 4053943           | ns                |        | G2583_3890      | rpsO      | CDS        |
| O157                 | 4056310           | s                 |        | G2583_3893      | infB      | CDS        |
| O157                 | 4060069           | s                 |        | G2583_3895      | yhbC      | CDS        |
| O157                 | 4062106           | s                 |        | G2583_3897      | argG      | CDS        |
| O157                 | 4062586           | ns                |        | G2583_3898      | yhbX      | CDS        |
| O157                 | 4065106           | i                 |        | intergenic      |           |            |
| O157                 | 4065371           | ns                |        | G2583_3901      | glmM      | CDS        |
| CB9615               | 3954069           | s                 |        | G2583_3901      | glmM      | CDS        |
| O157                 | 4067597           | ns                |        | G2583_3903      | hfIB      | CDS        |
| O157                 | 4076866           | ns                |        | G2583_3912      | ispB      | CDS        |
| O157                 | 4077127           | i                 |        | intergenic      |           |            |
| O157                 | 4077165           | i                 |        | intergenic      |           |            |
| Sakai                | 4077481           | ns                |        | G2583_3913      | sfsB      | CDS        |
| CB9615               | 3967415           | ns                |        | G2583_3914      | murA      | CDS        |
| CB9615               | 3967433           | s                 |        | G2583_3914      | murA      | CDS        |
| O157                 | 4081542           | s                 |        | G2583_3919      | yrbE      | CDS        |
| O157                 | 4083988           | ns                |        | G2583_3922      | kdsD      | CDS        |

| lineage <sup>a</sup> | site <sup>b</sup> | mutation          |        | gene       | Gene name | Type       |
|----------------------|-------------------|-------------------|--------|------------|-----------|------------|
|                      |                   | type <sup>c</sup> | recomb |            |           |            |
| O157                 | 4086506           | s                 |        | G2583_3926 | lptB      | CDS        |
| O157                 | 4086858           | s                 |        | G2583_3926 | lptB      | CDS        |
| O157                 | 4087954           | s                 |        | G2583_3927 | rpoN      | CDS        |
| CB9615               | 3977087           | ns                |        | G2583_3927 | rpoN      | CDS        |
| CB9615               | 3980613           | ns                |        | G2583_3933 | mtgA      | CDS        |
| O157                 | 4091967           | ns                |        | G2583_3933 | mtgA      | CDS        |
| EDL933               | 4160087           | ins               |        | intergenic |           |            |
| O157                 | 4092951           | nc                |        | G2583_3935 | -         | pseudogene |
| O157                 | 4093286           | ns                |        | G2583_3936 | arcB      | CDS        |
| CB9615               | 3985323           | i                 |        | intergenic |           |            |
| CB9615               | 3985393           | i                 |        | intergenic |           |            |
| EDL933               | 4164506           | ns                |        | G2583_3938 | gltB      | CDS        |
| O157                 | 4097903           | ns                |        | G2583_3938 | gltB      | CDS        |
| Sakai                | 4100596           | ns                |        | G2583_3938 | gltB      | CDS        |
| O157                 | 4105064           | s                 |        | G2583_3942 | nanK      | CDS        |
| O157                 | 4105320           | ns                |        | G2583_3942 | nanK      | CDS        |
| O157                 | 4106520           | s                 |        | G2583_3944 | nanT      | CDS        |
| O157                 | 4110204           | del-3             |        | G2583_3947 | dcuD      | CDS        |
| O157                 | 4110244           | ns                |        | G2583_3947 | dcuD      | CDS        |
| O157                 | 4110958           | del-6             |        | G2583_3947 | dcuD      | CDS        |
| O157                 | 4111331           | del-2             |        | G2583_3947 | dcuD      | CDS        |
| O157                 | 4113276           | s                 |        | G2583_3950 | rpsI      | CDS        |
| CB9615               | 4003038           | ns                |        | G2583_3952 | yhcM      | CDS        |
| O157                 | 4114838           | s                 |        | G2583_3952 | yhcM      | CDS        |
| CB9615               | 4004276           | ns                |        | G2583_3953 | yhcB      | CDS        |
| O157                 | 4116906           | ns                |        | G2583_3954 | degQ      | CDS        |
| CB9615               | 4007407           | s                 |        | G2583_3956 | mdh       | CDS        |
| O157                 | 4119805           | i                 |        | intergenic |           |            |
| O157                 | 4120502           | i                 |        | intergenic |           |            |
| CB9615               | 4009361           | ins-2             |        | intergenic |           |            |
| EDL933               | 4188637           | ins               |        | intergenic |           |            |
| CB9615               | 4010292           | ns                |        | G2583_3960 | aaeB      | CDS        |
| O157                 | 4121550           | ns                |        | G2583_3960 | aaeB      | CDS        |
| CB9615               | 4011587           | s                 |        | G2583_3960 | aaeB      | CDS        |
| O157                 | 4123421           | ns                |        | G2583_3960 | aaeB      | CDS        |
| O157                 | 4124170           | del-3             |        | G2583_3961 | aaeA      | CDS        |
| O157                 | 4124478           | ns                |        | G2583_3962 | aaeX      | CDS        |
| O157                 | 4125741           | ins-6             |        | intergenic |           |            |
| O157                 | 4126692           | ns                |        | G2583_3964 | tldD      | CDS        |
| O157                 | 4133899           | ns                |        | G2583_3969 | mreC      | CDS        |
| CB9615               | 4025174           | ns                |        | G2583_3971 | csrD      | CDS        |
| O157                 | 4139812           | i                 |        | intergenic |           |            |
| CB9615               | 4029379           | ns                |        | G2583_3974 | accB      | CDS        |
| O157                 | 4141540           | ns                |        | G2583_3975 | accC      | CDS        |
| O157                 | 4142288           | i                 |        | intergenic |           |            |

| lineage <sup>a</sup> | site <sup>b</sup> | mutation          |        | gene       | Gene name | Type       |
|----------------------|-------------------|-------------------|--------|------------|-----------|------------|
|                      |                   | type <sup>c</sup> | recomb |            |           |            |
| O157                 | 4143190           | s                 |        | G2583_3977 | panF      | CDS        |
| O157                 | 4143433           | s                 |        | G2583_3977 | panF      | CDS        |
| CB9615               | 4033165           | s                 |        | G2583_3978 | prmA      | CDS        |
| O157                 | 4150626           | ns                |        | G2583_3985 | acrF      | CDS        |
| O55/O157             | 4040626           | indel-8           |        | G2583_3985 | acrF      | CDS        |
| O157                 | 4153853           | i                 |        | intergenic |           |            |
| O157                 | 4156633           | nc                |        | G2583_3989 | yhdY      | pseudogene |
| O157                 | 4156718           | nc                |        | G2583_3989 | yhdY      | pseudogene |
| CB9615               | 4045524           | nc                |        | G2583_3989 | yhdY      | pseudogene |
| O157                 | 4156905           | nc                |        | G2583_3989 | yhdY      | pseudogene |
| O157                 | 4157289           | nc                |        | G2583_3989 | yhdY      | pseudogene |
| CB9615               | 4047394           | i                 |        | intergenic |           |            |
| CB9615               | 4047395           | i                 |        | intergenic |           |            |
| EDL933               | 4226034           | ins               |        | intergenic |           |            |
| Sakai                | 4160560           | nc                |        | G2583_3994 | rri       | rRNA       |
| Sakai                | 4160569           | nc                |        | G2583_3994 | rri       | rRNA       |
| EDL933               | 4227835           | ins               |        | G2583_3994 | rri       | rRNA       |
| Sakai                | 4161142           | nc                |        | G2583_3994 | rri       | rRNA       |
| EDL933               | 4228455           | del-12            |        | G2583_3994 | rri       | rRNA       |
| EDL933               | 4228456           | ins-14            |        | G2583_3994 | rri       | rRNA       |
| EDL933               | 4228654           | nc                |        | G2583_3994 | rri       | rRNA       |
| O157                 | 4161524           | nc                |        | G2583_3994 | rri       | rRNA       |
| EDL933               | 4228868           | nc                |        | G2583_3994 | rri       | rRNA       |
| EDL933               | 4228873           | nc                |        | G2583_3994 | rri       | rRNA       |
| EDL933               | 4229960           | nc                | rec    | G2583_3997 | rrs       | rRNA       |
| EDL933               | 4229975           | nc                | rec    | G2583_3997 | rrs       | rRNA       |
| EDL933               | 4229976           | nc                | rec    | G2583_3997 | rrs       | rRNA       |
| EDL933               | 4229977           | nc                | rec    | G2583_3997 | rrs       | rRNA       |
| EDL933               | 4229978           | nc                | rec    | G2583_3997 | rrs       | rRNA       |
| EDL933               | 4229979           | nc                | rec    | G2583_3997 | rrs       | rRNA       |
| EDL933               | 4229988           | nc                | rec    | G2583_3997 | rrs       | rRNA       |
| EDL933               | 4229992           | nc                | rec    | G2583_3997 | rrs       | rRNA       |
| EDL933               | 4229996           | nc                | rec    | G2583_3997 | rrs       | rRNA       |
| O157                 | 4163631           | nc                |        | G2583_3997 | rrs       | rRNA       |
| O157                 | 4163997           | ns                |        | G2583_3998 | yrdA      | CDS        |
| O157                 | 4164849           | s                 |        | G2583_3999 | yrdB      | CDS        |
| CB9615               | 4056533           | s                 |        | G2583_4004 | smf       | CDS        |
| CB9615               | 4056888           | ns                |        | G2583_4004 | smf       | CDS        |
| CB9615               | 4057093           | ns                |        | G2583_4004 | smf       | CDS        |
| CB9615               | 4057929           | ns                |        | G2583_4005 | def       | CDS        |
| Sakai                | 4170227           | ns                |        | G2583_4007 | rsmB      | CDS        |
| O157                 | 4170778           | ns                |        | G2583_4007 | rsmB      | CDS        |
| Sakai                | 4172246           | s                 |        | G2583_4008 | trkA      | CDS        |
| CB9615               | 4061703           | i                 |        | intergenic |           |            |
| CB9615               | 4063470           | s                 |        | G2583_4012 | rplQ      | CDS        |

| lineage <sup>a</sup> | site <sup>b</sup> | mutation          |        | gene       | Gene name | Type       |
|----------------------|-------------------|-------------------|--------|------------|-----------|------------|
|                      |                   | type <sup>c</sup> | recomb |            |           |            |
| O157                 | 4179942           | s                 |        | G2583_4021 | rpsE      | CDS        |
| O157                 | 4187549           | s                 |        | G2583_4038 | rpIC      | CDS        |
| O157                 | 4190210           | s                 |        | G2583_4044 | tufA      | CDS        |
| O157                 | 4192284           | s                 |        | G2583_4045 | fusA      | CDS        |
| O157                 | 4194601           | ns                |        | G2583_4048 | yheL      | CDS        |
| O157                 | 4195033           | ns                |        | G2583_4049 | yheM      | CDS        |
| O157                 | 4195353           | ns                |        | G2583_4050 | yheN      | CDS        |
| CB9615               | 4085339           | ns                |        | G2583_4052 | fkpA      | CDS        |
| EDL933               | 4085339           | ns                |        | G2583_4052 | fkpA      | CDS        |
| Sakai                | 4085339           | ns                |        | G2583_4052 | fkpA      | CDS        |
| O157                 | 4197435           | i                 |        | intergenic |           |            |
| CB9615               | 4086910           | ns                |        | G2583_4054 | slyD      | CDS        |
| O157                 | 4198737           | ns                |        | G2583_4056 | kefB      | CDS        |
| CB9615               | 4088589           | ns                |        | G2583_4056 | kefB      | CDS        |
| O157                 | 4200690           | s                 |        | G2583_4057 | kefG      | CDS        |
| CB9615               | 4090409           | ns                |        | G2583_4058 | yheS      | CDS        |
| CB9615               | 4091034           | ns                |        | G2583_4058 | yheS      | CDS        |
| O157                 | 4204857           | s                 |        | G2583_4061 | prkB      | CDS        |
| O157                 | 4207271           | ns                |        | G2583_4064 | yhfK      | CDS        |
| CB9615               | 4099995           | ns                |        | G2583_4067 | fic       | CDS        |
| O157                 | 4212761           | s                 |        | G2583_4070 | tsgA      | CDS        |
| CB9615               | 4101599           | ns                |        | G2583_4070 | tsgA      | CDS        |
| CB9615               | 4102152           | s                 |        | G2583_4070 | tsgA      | CDS        |
| Sakai                | 4213984           | ns                |        | G2583_4071 | nirB      | CDS        |
| CB9615               | 4109661           | ns                |        | G2583_4076 | frlA      | CDS        |
| O157                 | 4221007           | ns                |        | G2583_4076 | frlA      | CDS        |
| CB9615               | 4110445           | ns                |        | G2583_4077 | frlB      | CDS        |
| O157                 | 4223512           | nc                |        | G2583_4079 | -         | pseudogene |
| O157                 | 4224678           | s                 |        | G2583_4080 | frlR      | CDS        |
| CB9615               | 4114478           | ns                |        | G2583_4081 | trpS      | CDS        |
| O157                 | 4232974           | ns                |        | G2583_4089 | hofP      | CDS        |
| O157                 | 4233965           | s                 |        | G2583_4090 | hofN      | CDS        |
| O157                 | 4234194           | del               |        | G2583_4091 | hofM      | CDS        |
| O157                 | 4237354           | s                 |        | G2583_4092 | mrcA      | CDS        |
| O157                 | 4239608           | ns                |        | G2583_4094 | yrfF      | CDS        |
| O157                 | 4244359           | ns                |        | G2583_4098 | yhgE      | CDS        |
| O157                 | 4246730           | ns                |        | G2583_4101 | envZ      | CDS        |
| O157                 | 4250491           | ns                |        | G2583_4104 | yhgF      | CDS        |
| O157                 | 4250541           | s                 |        | G2583_4104 | yhgF      | CDS        |
| O157                 | 4252233           | i                 |        | intergenic |           |            |
| Sakai                | 4253956           | ns                |        | G2583_4106 | feoB      | CDS        |
| CB9615               | 4145419           | s                 |        | G2583_4109 | bioH      | CDS        |
| O157                 | 4258834           | s                 |        | G2583_4112 | gntT      | CDS        |
| O157                 | 4261820           | ns                |        | G2583_4113 | malQ      | CDS        |
| O157                 | 4262127           | ns                |        | G2583_4113 | malQ      | CDS        |

| lineage <sup>a</sup> | site <sup>b</sup> | mutation          |        | gene       | Gene name | Type       |
|----------------------|-------------------|-------------------|--------|------------|-----------|------------|
|                      |                   | type <sup>c</sup> | recomb |            |           |            |
| O157                 | 4262902           | s                 |        | G2583_4114 | malP      | CDS        |
| O157                 | 4269534           | s                 |        | G2583_4119 | rtcA      | CDS        |
| O157                 | 4269943           | ns                |        | G2583_4120 | rtcB      | CDS        |
| CB9615               | 4158807           | ns                |        | G2583_4120 | rtcB      | CDS        |
| O157                 | 4271823           | s                 |        | G2583_4121 | rtcR      | CDS        |
| CB9615               | 4163991           | s                 |        | G2583_4125 | glpD      | CDS        |
| CB9615               | 4164972           | s                 |        | G2583_4125 | glpD      | CDS        |
| CB9615               | 4165486           | ns                |        | G2583_4126 | -         | CDS        |
| CB9615               | 4167562           | ns                |        | G2583_4128 | yzgL      | CDS        |
| CB9615               | 4167770           | s                 |        | G2583_4128 | yzgL      | CDS        |
| O157                 | 4279897           | del               |        | intergenic |           |            |
| O157                 | 4280655           | ns                |        | G2583_4129 | glgP      | CDS        |
| O157                 | 4292642           | ns                |        | G2583_4136 | -         | CDS        |
| CB9615               | 4181462           | nc                |        | G2583_4137 | -         | pseudogene |
| CB9615               | 4181805           | nc                |        | G2583_4137 | -         | pseudogene |
| O157                 | 4294165           | nc                |        | G2583_4137 | -         | pseudogene |
| CB9615               | 4186806           | ns                |        | G2583_4141 | yhhW      | CDS        |
| O157                 | 4299067           | s                 |        | G2583_4142 | yhhX      | CDS        |
| CB9615               | 4188464           | ns                |        | G2583_4142 | yhhX      | CDS        |
| CB9615               | 4188778           | ins               |        | G2583_4143 | -         | pseudogene |
| CB9615               | 4188862           | i                 |        | intergenic |           |            |
| CB9615               | 4189151           | ns                |        | G2583_4144 | yhhY      | CDS        |
| O55/O157             | 4190193           | ns                |        | G2583_4145 | -         | CDS        |
| O55/O157             | 4190500           | indel             |        | G2583_4145 | -         | CDS        |
| O55/O157             | 4190626           | ns                |        | G2583_4146 | -         | CDS        |
| O55/O157             | 4191169           | i                 |        | intergenic |           |            |
| EDL933               | 4369934           | ins               |        | intergenic |           |            |
| O157                 | 4303023           | ns                |        | G2583_4147 | ggt       | CDS        |
| CB9615               | 4194804           | s                 |        | G2583_4150 | ugpC      | CDS        |
| O157                 | 4306654           | ns                |        | G2583_4150 | ugpC      | CDS        |
| O157                 | 4307830           | s                 |        | G2583_4152 | ugpA      | CDS        |
| CB9615               | 4197149           | ns                |        | G2583_4152 | ugpA      | CDS        |
| EDL933               | 4375820           | ins               |        | intergenic |           |            |
| O157                 | 4315671           | s                 |        | G2583_4159 | livK      | CDS        |
| O157                 | 4316371           | i                 |        | intergenic |           |            |
| EDL933               | 4384250           | ns                |        | G2583_4161 | -         | CDS        |
| O157                 | 4320461           | s                 |        | G2583_4165 | ftsX      | CDS        |
| O157                 | 4321246           | ns                |        | G2583_4165 | ftsX      | CDS        |
| CB9615               | 4211248           | ns                |        | G2583_4167 | ftsY      | CDS        |
| EDL933               | 4392388           | ns                |        | G2583_4171 | yhhN      | CDS        |
| CB9615               | 4214641           | ns                |        | G2583_4172 | zntA      | CDS        |
| CB9615               | 4214826           | ns                |        | G2583_4172 | zntA      | CDS        |
| CB9615               | 4215147           | ns                |        | G2583_4172 | zntA      | CDS        |
| CB9615               | 4215551           | s                 |        | G2583_4172 | zntA      | CDS        |
| CB9615               | 4215769           | ns                |        | G2583_4172 | zntA      | CDS        |

| lineage <sup>a</sup> | site <sup>b</sup> | mutation          |        | gene       | Gene name | Type |
|----------------------|-------------------|-------------------|--------|------------|-----------|------|
|                      |                   | type <sup>c</sup> | recomb |            |           |      |
| CB9615               | 4215904           | ns                |        | G2583_4172 | zntA      | CDS  |
| O157                 | 4329552           | s                 |        | G2583_4175 | dcrB      | CDS  |
| CB9615               | 4218701           | ns                |        | G2583_4176 | yhhS      | CDS  |
| O157                 | 4330514           | ns                |        | G2583_4176 | yhhS      | CDS  |
| O157                 | 4330923           | ns                |        | G2583_4176 | yhhS      | CDS  |
| Sakai                | 4333454           | del               |        | G2583_4179 | -         | CDS  |
| Sakai                | 4333526           | ins               |        | G2583_4179 | -         | CDS  |
| Sakai                | 4333539           | ins-3             |        | G2583_4179 | -         | CDS  |
| Sakai                | 4333553           | s                 |        | G2583_4179 | -         | CDS  |
| O157                 | 4334477           | ns                |        | G2583_4180 | -         | CDS  |
| O157                 | 4335972           | ns                |        | G2583_4183 | acyl      | CDS  |
| O157                 | 4339435           | ns                |        | G2583_4187 | -         | CDS  |
| O157                 | 4344939           | ns                |        | G2583_4192 | -         | CDS  |
| O157                 | 4345465           | s                 |        | G2583_4193 | -         | CDS  |
| CB9615               | 4234616           | s                 |        | G2583_4194 | fabG      | CDS  |
| O157                 | 4348937           | s                 |        | G2583_4197 | nikA      | CDS  |
| O157                 | 4349045           | s                 |        | G2583_4197 | nikA      | CDS  |
| CB9615               | 4237716           | ns                |        | G2583_4197 | nikA      | CDS  |
| O157                 | 4350614           | ns                |        | G2583_4198 | nikB      | CDS  |
| O157                 | 4352543           | ns                |        | G2583_4201 | nikE      | CDS  |
| O157                 | 4354638           | s                 |        | G2583_4204 | -         | CDS  |
| O157                 | 4354899           | s                 |        | G2583_4204 | -         | CDS  |
| CB9615               | 4245017           | s                 |        | G2583_4206 | -         | CDS  |
| CB9615               | 4245392           | ns                |        | G2583_4207 | -         | CDS  |
| CB9615               | 4246978           | s                 |        | G2583_4208 | -         | CDS  |
| EDL933               | 4425759           | ins               |        | intergenic |           |      |
| O157                 | 4359924           | ns                |        | G2583_4211 | HicA      | CDS  |
| CB9615               | 4250830           | ns                |        | G2583_4213 | rbbA      | CDS  |
| O157                 | 4365549           | ns                |        | G2583_4215 | yhiJ      | CDS  |
| O157                 | 4365645           | ns                |        | G2583_4215 | yhiJ      | CDS  |
| O157                 | 4366308           | ns                |        | G2583_4215 | yhiJ      | CDS  |
| O157                 | 4366680           | ns                |        | G2583_4215 | yhiJ      | CDS  |
| CB9615               | 4255512           | s                 |        | G2583_4215 | yhiJ      | CDS  |
| EDL933               | 4436235           | ins               |        | intergenic |           |      |
| O157                 | 4369026           | i                 |        | intergenic |           |      |
| O157                 | 4370237           | s                 |        | G2583_4217 | yhiM      | CDS  |
| CB9615               | 4259408           | ns                |        | G2583_4218 | yhiN      | CDS  |
| EDL933               | 4439345           | ins               |        | intergenic |           |      |
| EDL933               | 4441586           | ins               |        | intergenic |           |      |
| CB9615               | 4263599           | i                 |        | intergenic |           |      |
| O157                 | 4375053           | i                 |        | intergenic |           |      |
| O157                 | 4375356           | s                 |        | G2583_4222 | yhiP      | CDS  |
| O157                 | 4375603           | ns                |        | G2583_4222 | yhiP      | CDS  |
| O157                 | 4378727           | s                 |        | G2583_4224 | prfC      | CDS  |
| O157                 | 4382189           | i                 |        | intergenic |           |      |



| lineage <sup>a</sup> | site <sup>b</sup> | mutation          |        | gene       | Gene name | Type |
|----------------------|-------------------|-------------------|--------|------------|-----------|------|
|                      |                   | type <sup>c</sup> | recomb |            |           |      |
| O157                 | 4385186           | ns                |        | G2583_4230 | -         | CDS  |
| O157                 | 4385236           | i                 |        | intergenic |           |      |
| EDL933               | 4452734           | ins               |        | intergenic |           |      |
| CB9615               | 4274138           | i                 |        | intergenic |           |      |
| O157                 | 4386699           | del               |        | G2583_4231 | yhiS      | CDS  |
| EDL933               | 4454210           | ins               |        | intergenic |           |      |
| CB9615               | 4277769           | ns                |        | G2583_4234 | chuS      | CDS  |
| O157                 | 4390671           | ns                |        | G2583_4235 | chuA      | CDS  |
| O157                 | 4391980           | ns                |        | G2583_4236 | -         | CDS  |
| O157                 | 4395620           | s                 |        | G2583_4241 | chuU      | CDS  |
| O157                 | 4397023           | s                 |        | G2583_4242 | shuV      | CDS  |
| O157                 | 4397175           | ns                |        | G2583_4242 | shuV      | CDS  |
| O157                 | 4398078           | i                 |        | intergenic |           |      |
| CB9615               | 4286968           | ns                |        | G2583_4244 | hdeB      | CDS  |
| O157                 | 4398425           | ns                |        | G2583_4244 | hdeB      | CDS  |
| CB9615               | 4287992           | ns                |        | G2583_4246 | hdeD      | CDS  |
| CB9615               | 4288987           | i                 |        | intergenic |           |      |
| O157                 | 4402351           | ns                |        | G2583_4248 | mdtE      | CDS  |
| CB9615               | 4295920           | s                 |        | G2583_4252 | gadX      | CDS  |
| O157                 | 4407409           | s                 |        | G2583_4252 | gadX      | CDS  |
| O157                 | 4408856           | s                 |        | G2583_4253 | gadA      | CDS  |
| O157                 | 4413669           | ns                |        | G2583_4256 | yhjB      | CDS  |
| CB9615               | 4302797           | i                 |        | intergenic |           |      |
| CB9615               | 4305311           | i                 |        | intergenic |           |      |
| O157                 | 4418157           | ns                |        | G2583_4259 | yhjE      | CDS  |
| CB9615               | 4309952           | i                 |        | intergenic |           |      |
| O157                 | 4424348           | ns                |        | G2583_4264 | dctA      | CDS  |
| O157                 | 4426243           | ns                |        | G2583_4265 | yhjK      | CDS  |
| O157                 | 4426670           | ns                |        | G2583_4265 | yhjK      | CDS  |
| O157                 | 4428520           | ns                |        | G2583_4266 | bcsC      | CDS  |
| O157                 | 4428751           | ns                |        | G2583_4266 | bcsC      | CDS  |
| CB9615               | 4318922           | ns                |        | G2583_4266 | bcsC      | CDS  |
| O157                 | 4430782           | ns                |        | G2583_4266 | bcsC      | CDS  |
| O157                 | 4430902           | del-10            |        | G2583_4266 | bcsC      | CDS  |
| O157                 | 4432024           | s                 |        | G2583_4267 | bcsZ      | CDS  |
| O157                 | 4432369           | s                 |        | G2583_4267 | bcsZ      | CDS  |
| O157                 | 4432500           | ins-18            |        | G2583_4268 | bcsB      | CDS  |
| O157                 | 4436826           | ns                |        | G2583_4269 | bcsA      | CDS  |
| O157                 | 4437936           | ns                |        | G2583_4270 | yhjQ      | CDS  |
| O157                 | 4438106           | ns                |        | G2583_4270 | yhjQ      | CDS  |
| O157                 | 4438234           | ns                |        | G2583_4271 | yhjR      | CDS  |
| O157                 | 4442074           | i                 |        | intergenic |           |      |
| O157                 | 4443246           | ns                |        | G2583_4276 | yhjV      | CDS  |
| O157                 | 4444663           | ns                |        | G2583_4277 | dppF      | CDS  |
| EDL933               | 4512050           | s                 |        | G2583_4277 | dppF      | CDS  |

| lineage <sup>a</sup> | site <sup>b</sup> | mutation          |        | gene       | Gene name | Type |
|----------------------|-------------------|-------------------|--------|------------|-----------|------|
|                      |                   | type <sup>c</sup> | recomb |            |           |      |
| O157                 | 4446912           | i                 |        | intergenic |           |      |
| O157                 | 4447835           | s                 |        | G2583_4280 | dppB      | CDS  |
| O157                 | 4449503           | s                 |        | G2583_4281 | dppA      | CDS  |
| Sakai                | 4450419           | i                 |        | intergenic |           |      |
| Sakai                | 4451098           | ns                |        | G2583_4283 | eptB      | CDS  |
| CB9615               | 4340244           | s                 |        | G2583_4283 | eptB      | CDS  |
| EDL933               | 4519633           | ins               |        | intergenic |           |      |
| EDL933               | 4519738           | ins               |        | intergenic |           |      |
| O55/O157             | 4341161           | s                 |        | G2583_4284 | lpfE      | CDS  |
| O55/O157             | 4341929           | ns                |        | G2583_4285 | lpfD      | CDS  |
| O55/O157             | 4342108           | ns                |        | G2583_4285 | lpfD      | CDS  |
| O55/O157             | 4342307           | ns                |        | G2583_4285 | lpfD      | CDS  |
| O55/O157             | 4342371           | ns                |        | G2583_4285 | lpfD      | CDS  |
| O157                 | 4455438           | ns                |        | G2583_4286 | fimD      | CDS  |
| O157                 | 4455630           | ns                |        | G2583_4286 | fimD      | CDS  |
| O55/O157             | 4346215           | ns                |        | G2583_4288 | lpfA      | CDS  |
| CB9615               | 4346771           | ins               |        | intergenic |           |      |
| O157                 | 4458200           | i                 |        | intergenic |           |      |
| CB9615               | 4346824           | i                 |        | intergenic |           |      |
| O157                 | 4458252           | i                 |        | intergenic |           |      |
| O157                 | 4458298           | i                 |        | intergenic |           |      |
| O157                 | 4458335           | ins               |        | intergenic |           |      |
| O157                 | 4458476           | ns                |        | G2583_4289 | yhjX      | CDS  |
| CB9615               | 4352263           | ns                |        | G2583_4293 | bisC      | CDS  |
| CB9615               | 4352387           | s                 |        | G2583_4293 | bisC      | CDS  |
| O157                 | 4465177           | s                 |        | G2583_4295 | ghrB      | CDS  |
| CB9615               | 4355806           | s                 |        | G2583_4297 | yiaG      | CDS  |
| CB9615               | 4356714           | ns                |        | G2583_4299 | hokA      | CDS  |
| O157                 | 4472769           | ns                |        | G2583_4303 | wechH     | CDS  |
| O157                 | 4478173           | s                 |        | G2583_4308 | xyIF      | CDS  |
| O157                 | 4480525           | s                 |        | G2583_4310 | xyIH      | CDS  |
| O157                 | 4480615           | s                 |        | G2583_4310 | xyIH      | CDS  |
| O157                 | 4483037           | ns                |        | G2583_4312 | bax       | CDS  |
| O157                 | 4483743           | s                 |        | G2583_4313 | malS      | CDS  |
| CB9615               | 4374461           | ns                |        | G2583_4314 | avtA      | CDS  |
| CB9615               | 4375323           | ns                |        | G2583_4314 | avtA      | CDS  |
| CB9615               | 4376835           | s                 |        | G2583_4316 | -         | CDS  |
| O157                 | 4488646           | ns                |        | G2583_4316 | -         | CDS  |
| CB9615               | 4377842           | s                 |        | G2583_4317 | -         | CDS  |
| O157                 | 4489389           | ns                |        | G2583_4317 | -         | CDS  |
| O157                 | 4491515           | s                 |        | G2583_4318 | -         | CDS  |
| CB9615               | 4381450           | s                 |        | G2583_4319 | yiaT      | CDS  |
| O157                 | 4493515           | ns                |        | G2583_4320 | yiaU      | CDS  |
| O157                 | 4497520           | ns                |        | G2583_4323 | aldB      | CDS  |
| O157                 | 4498049           | ns                |        | G2583_4324 | -         | CDS  |

| lineage <sup>a</sup> | site <sup>b</sup> | mutation          |        | gene       | Gene name | Type |
|----------------------|-------------------|-------------------|--------|------------|-----------|------|
|                      |                   | type <sup>c</sup> | recomb |            |           |      |
| Sakai                | 4500657           | i                 |        | intergenic |           |      |
| O157                 | 4500663           | del               |        | intergenic |           |      |
| CB9615               | 4390049           | s                 |        | G2583_4326 | selB      | CDS  |
| O157                 | 4501631           | ns                |        | G2583_4326 | selB      | CDS  |
| CB9615               | 4391540           | ns                |        | G2583_4327 | selA      | CDS  |
| O157                 | 4504901           | s                 | rec    | G2583_4329 | rhsB      | CDS  |
| O157                 | 4504943           | s                 | rec    | G2583_4329 | rhsB      | CDS  |
| O157                 | 4505009           | s                 | rec    | G2583_4329 | rhsB      | CDS  |
| Sakai                | 4505017           | ns                |        | G2583_4329 | rhsB      | CDS  |
| O157                 | 4505036           | s                 | rec    | G2583_4329 | rhsB      | CDS  |
| O157                 | 4505042           | s                 | rec    | G2583_4329 | rhsB      | CDS  |
| O157                 | 4505086           | ns                | rec    | G2583_4329 | rhsB      | CDS  |
| CB9615               | 4394300           | ns                |        | G2583_4329 | rhsB      | CDS  |
| CB9615               | 4395507           | ns                |        | G2583_4329 | rhsB      | CDS  |
| O55/O157             | 4396300           | s                 | rec    | G2583_4329 | rhsB      | CDS  |
| O55/O157             | 4396357           | s                 | rec    | G2583_4329 | rhsB      | CDS  |
| O55/O157             | 4396360           | s                 | rec    | G2583_4329 | rhsB      | CDS  |
| O55/O157             | 4396419           | ns                | rec    | G2583_4329 | rhsB      | CDS  |
| O55/O157             | 4396576           | s                 | rec    | G2583_4329 | rhsB      | CDS  |
| O55/O157             | 4396591           | s                 | rec    | G2583_4329 | rhsB      | CDS  |
| O55/O157             | 4396593           | ns                | rec    | G2583_4329 | rhsB      | CDS  |
| O55/O157             | 4396645           | s                 | rec    | G2583_4329 | rhsB      | CDS  |
| O55/O157             | 4396651           | s                 | rec    | G2583_4329 | rhsB      | CDS  |
| O55/O157             | 4396699           | s                 | rec    | G2583_4329 | rhsB      | CDS  |
| O55/O157             | 4396843           | s                 | rec    | G2583_4329 | rhsB      | CDS  |
| O55/O157             | 4396848           | ns                | rec    | G2583_4329 | rhsB      | CDS  |
| O55/O157             | 4396860           | ns                | rec    | G2583_4329 | rhsB      | CDS  |
| O55/O157             | 4396876           | s                 | rec    | G2583_4329 | rhsB      | CDS  |
| O55/O157             | 4397110           | ns                | rec    | G2583_4329 | rhsB      | CDS  |
| EDL933               | 4575772           | ns                |        | G2583_4329 | rhsB      | CDS  |
| O55/O157             | 4398299           | i                 | rec    | intergenic |           |      |
| O55/O157             | 4398300           | i                 | rec    | intergenic |           |      |
| O55/O157             | 4398338           | i                 | rec    | intergenic |           |      |
| O55/O157             | 4398346           | i                 | rec    | intergenic |           |      |
| O55/O157             | 4398368           | i                 | rec    | intergenic |           |      |
| O55/O157             | 4398401           | i                 | rec    | intergenic |           |      |
| O55/O157             | 4398463           | i                 | rec    | intergenic |           |      |
| O55/O157             | 4398464           | i                 | rec    | intergenic |           |      |
| O55/O157             | 4398470           | i                 | rec    | intergenic |           |      |
| O157                 | 4509941           | i                 |        | intergenic |           |      |
| CB9615               | 4400096           | i                 |        | intergenic |           |      |
| O157                 | 4510466           | s                 |        | G2583_4332 | yibV      | CDS  |
| O157                 | 4510621           | ins               |        | G2583_4332 | yibV      | CDS  |
| CB9615               | 4400664           | ns                |        | G2583_4332 | yibV      | CDS  |
| CB9615               | 4404604           | ins-6             |        | G2583_4335 | mtlA      | CDS  |

| lineage <sup>a</sup> | site <sup>b</sup> | mutation          |        | gene       | Gene name | Type       |
|----------------------|-------------------|-------------------|--------|------------|-----------|------------|
|                      |                   | type <sup>c</sup> | recomb |            |           |            |
| CB9615               | 4406735           | s                 |        | G2583_4337 | mtlR      | CDS        |
| O157                 | 4518251           | ns                |        | G2583_4339 | -         | CDS        |
| O157                 | 4523544           | ns                |        | G2583_4341 | -         | CDS        |
| O157                 | 4526398           | ns                |        | G2583_4343 | lldR      | CDS        |
| O157                 | 4534545           | s                 |        | G2583_4352 | envC      | CDS        |
| O157                 | 4534683           | s                 |        | G2583_4352 | envC      | CDS        |
| CB9615               | 4427826           | s                 |        | G2583_4355 | tdh       | CDS        |
| Sakai                | 4538018           | ns                |        | G2583_4355 | tdh       | CDS        |
| EDL933               | 4609523           | ins               |        | intergenic |           |            |
| O157                 | 4543120           | s                 |        | G2583_4360 | rfaC      | CDS        |
| O157                 | 4543685           | ns                |        | G2583_4360 | rfaC      | CDS        |
| CB9615               | 4434958           | ins               |        | intergenic |           |            |
| O157                 | 4547226           | i                 |        | intergenic |           |            |
| O157                 | 4547453           | s                 |        | G2583_4364 | rfaY      | CDS        |
| O157                 | 4547914           | ns                |        | G2583_4364 | rfaY      | CDS        |
| O157                 | 4556350           | s                 |        | G2583_4374 | yicR      | CDS        |
| O157                 | 4558841           | s                 |        | G2583_4377 | slmA      | CDS        |
| CB9615               | 4451003           | ns                |        | G2583_4380 | yicC      | CDS        |
| O157                 | 4564096           | ns                |        | G2583_4383 | ligB      | CDS        |
| O157                 | 4569728           | s                 |        | G2583_4388 | recG      | CDS        |
| O157                 | 4570712           | s                 |        | G2583_4388 | recG      | CDS        |
| O157                 | 4573161           | s                 |        | G2583_4390 | gltS      | CDS        |
| CB9615               | 4465106           | ns                |        | G2583_4392 | yicH      | CDS        |
| EDL933               | 4645780           | ns                |        | G2583_4393 | yicI      | CDS        |
| O157                 | 4577526           | ns                |        | G2583_4393 | yicI      | CDS        |
| O157                 | 4578359           | s                 |        | G2583_4393 | yicI      | CDS        |
| O157                 | 4578821           | s                 |        | G2583_4393 | yicI      | CDS        |
| CB9615               | 4469664           | ns                |        | G2583_4394 | yicJ      | CDS        |
| O157                 | 4580637           | i                 |        | intergenic |           |            |
| O157                 | 4582645           | ins-3             |        | G2583_4397 | insN      | CDS        |
| CB9615               | 4475455           | nc                |        | G2583_4403 | -         | pseudogene |
| Sakai                | 4588247           | ns                |        | ECs4547    | -         | CDS        |
| O157                 | 4588998           | i                 |        | intergenic |           |            |
| O157                 | 4589115           | i                 |        | intergenic |           |            |
| CB9615               | 4476633           | i                 |        | intergenic |           |            |
| CB9615               | 4476805           | ns                |        | G2583_4405 | espF      | CDS        |
| O55/O157             | 4476813           | indel-13          |        | G2583_4405 | espF      | CDS        |
| CB9615               | 4476857           | s                 |        | G2583_4405 | espF      | CDS        |
| CB9615               | 4478763           | s                 |        | G2583_4409 | espB      | CDS        |
| CB9615               | 4479788           | s                 |        | G2583_4410 | espD      | CDS        |
| O55/O157             | 4480858           | ns                |        | G2583_4411 | espA      | CDS        |
| O55/O157             | 4484015           | ns                |        | G2583_4414 | eae       | CDS        |
| O55/O157             | 4484066           | ns                |        | G2583_4414 | eae       | CDS        |
| O55/O157             | 4600397           | indel-6           |        | G2583_4416 | tir       | CDS        |
| O55/O157             | 4489376           | i                 |        | intergenic |           |            |

| lineage <sup>a</sup> | site <sup>b</sup> | mutation          |        | gene            | Gene name | Type       |
|----------------------|-------------------|-------------------|--------|-----------------|-----------|------------|
|                      |                   | type <sup>c</sup> | recomb |                 |           |            |
| O157                 | 4604475           | ns                |        | G2583_4420      | SepQ      | CDS        |
| O157                 | 4608284           | s                 |        | G2583_4424      | escV      | CDS        |
| CB9615               | 4496576           | s                 |        | G2583_4425      | -         | CDS        |
| O157                 | 4610762           | s                 |        | G2583_4428      | EscJ      | CDS        |
| CB9615               | 4498936           | s                 |        | G2583_4430      | EscC      | CDS        |
| CB9615               | 4499965           | s                 |        | G2583_4430      | EscC      | CDS        |
| O157                 | 4612578           | s                 |        | G2583_4430      | EscC      | CDS        |
| O157                 | 4614822           | s                 |        | G2583_4434      | -         | CDS        |
| CB9615               | 4502473           | s                 |        | G2583_4434      | -         | CDS        |
| O157                 | 4616686           | s                 |        | G2583_4436      | EscT      | CDS        |
| Sakai                | 4617900           | ns                |        | G2583_4438      | escR      | CDS        |
| CB9615               | 4506287           | s                 |        | G2583_4440      | -         | CDS        |
| Sakai                | 4619636           | ns                |        | G2583_4442      | -         | CDS        |
| Sakai                | 4620815           | i                 |        | intergenic      |           |            |
| CB9615               | 4508362           | del-11            |        | intergenic      |           |            |
| O157                 | 4622761           | s                 |        | G2583_4445      | -         | CDS        |
| O157                 | 4622776           | s                 |        | G2583_4445      | -         | CDS        |
| CB9615               | 4511885           | ns                |        | G2583_4447      | -         | CDS        |
| CB9615               | 4512866           | s                 |        | G2583_4448      | yicL      | CDS        |
| O157                 | 4625706           | ns                |        | G2583_4449      | nlpA      | CDS        |
| O157                 | 4626391           | i                 |        | intergenic      |           |            |
| CB9615               | 4514883           | s                 |        | G2583_4451      | nepl      | CDS        |
| O157                 | 4628210           | i                 |        | intergenic      |           |            |
| CB9615               | 4522953           | s                 |        | G2583_4458      | uhpC      | CDS        |
| O157                 | 4635950           | ns                |        | G2583_4459      | uhpB      | CDS        |
| O157                 | 4636144           | s                 |        | G2583_4459      | uhpB      | CDS        |
| O157                 | 4636789           | s                 |        | G2583_4459      | uhpB      | CDS        |
| O55/O157             | 4524941           | s                 |        | G2583_4460      | uhpA      | CDS        |
| O157                 | 4639100           | ns                |        | G2583_4461      | -         | CDS        |
| O157                 | 4639140           | ns                |        | G2583_4461      | -         | CDS        |
| CB9615               | 4526999           | ins-2             |        | intergenic      |           |            |
| CB9615               | 4527252           | ns                |        | G2583_4462-4463 | -         | CDS        |
| O157                 | 4640095           | ns                |        | G2583_4462-4463 | -         | CDS        |
| O157                 | 4640747           | nc                |        | G2583_4463      | -         | pseudogene |
| O157                 | 4641102           | i                 |        | intergenic      |           |            |
| O157                 | 4641219           | i                 |        | intergenic      |           |            |
| O157                 | 4643460           | ns                |        | G2583_4466-4467 | ivbL      | CDS        |
| O157                 | 4644320           | i                 |        | intergenic      |           |            |
| O157                 | 4647222           | ns                |        | G2583_4472      | yidI      | CDS        |
| O157                 | 4650236           | ns                |        | G2583_4474      | yidK      | CDS        |
| CB9615               | 4538937           | s                 |        | G2583_4475      | yidL      | CDS        |
| Sakai                | 4652077           | ns                |        | G2583_4476      | glvA      | CDS        |
| Sakai                | 4652078           | s                 |        | G2583_4476      | glvA      | CDS        |
| O157                 | 4653763           | s                 |        | G2583_4477      | glvC      | CDS        |
| CB9615               | 4541755           | ns                |        | G2583_4477      | glvC      | CDS        |

| lineage <sup>a</sup> | site <sup>b</sup> | mutation          |        | gene       | Gene name | Type       |
|----------------------|-------------------|-------------------|--------|------------|-----------|------------|
|                      |                   | type <sup>c</sup> | recomb |            |           |            |
| CB9615               | 4542302           | del               |        | intergenic |           |            |
| O157                 | 4654972           | s                 |        | G2583_4478 | yidP      | CDS        |
| O157                 | 4660184           | ns                |        | G2583_4483 | yidR      | CDS        |
| CB9615               | 4549647           | ns                |        | G2583_4485 | yidX      | CDS        |
| O157                 | 4664304           | s                 |        | G2583_4488 | gyrB      | CDS        |
| O157                 | 4671008           | ns                |        | G2583_4493 | rnpA      | CDS        |
| EDL933               | 4743419           | del               |        | intergenic |           |            |
| EDL933               | 4743436           | del               |        | intergenic |           |            |
| EDL933               | 4743441           | i                 |        | intergenic |           |            |
| O157                 | 4674802           | del-2             |        | G2583_4496 | -         | CDS        |
| O157                 | 4675085           | ns                |        | G2583_4496 | -         | CDS        |
| O55/O157             | 4563020           | ns                |        | G2583_4496 | -         | CDS        |
| O55/O157             | 4564220           | s                 |        | G2583_4496 | -         | CDS        |
| O55/O157             | 4564396           | s                 |        | G2583_4497 | -         | CDS        |
| O55/O157             | 4564463           | i                 |        | intergenic |           |            |
| O157                 | 4679462           | ns                |        | G2583_4500 | tnaB      | CDS        |
| O157                 | 4680564           | ns                |        | G2583_4501 | mdtL      | CDS        |
| O157                 | 4683441           | s                 |        | G2583_4504 | yieF      | CDS        |
| O157                 | 4686702           | ns                |        | G2583_4507 | -         | CDS        |
| O157                 | 4687603           | s                 |        | G2583_4507 | -         | CDS        |
| O157                 | 4689103           | ns                |        | G2583_4508 | -         | CDS        |
| O55/O157             | 4577237           | ns                | rec    | G2583_4509 | -         | CDS        |
| O55/O157             | 4577248           | ns                | rec    | G2583_4509 | -         | CDS        |
| O55/O157             | 4577277           | ns                | rec    | G2583_4509 | -         | CDS        |
| O55/O157             | 4577316           | ns                | rec    | G2583_4509 | -         | CDS        |
| O55/O157             | 4577595           | ns                | rec    | G2583_4509 | -         | CDS        |
| Sakai                | 4690503           | i                 |        | intergenic |           |            |
| O55/O157             | 4578264           | nc                | rec    | G2583_4511 | -         | pseudogene |
| O55/O157             | 4578502           | nc                | rec    | G2583_4511 | -         | pseudogene |
| O55/O157             | 4578596           | indel             | rec    | G2583_4511 | -         | pseudogene |
| O55/O157             | 4578636           | nc                | rec    | G2583_4511 | -         | pseudogene |
| O55/O157             | 4578726           | nc                | rec    | G2583_4511 | -         | pseudogene |
| O55/O157             | 4578902           | nc                | rec    | G2583_4511 | -         | pseudogene |
| O55/O157             | 4578936           | nc                | rec    | G2583_4511 | -         | pseudogene |
| O55/O157             | 4579334           | nc                | rec    | G2583_4511 | -         | pseudogene |
| O55/O157             | 4579526           | nc                | rec    | G2583_4511 | -         | pseudogene |
| O55/O157             | 4579865           | nc                | rec    | G2583_4511 | -         | pseudogene |
| O55/O157             | 4580312           | nc                | rec    | G2583_4511 | -         | pseudogene |
| O55/O157             | 4580555           | indel             | rec    | G2583_4511 | -         | pseudogene |
| O55/O157             | 4580825           | i                 | rec    | intergenic |           |            |
| O55/O157             | 4580862           | i                 | rec    | intergenic |           |            |
| O55/O157             | 4580886           | i                 | rec    | intergenic |           |            |
| O55/O157             | 4580923           | ns                | rec    | G2583_4513 | -         | CDS        |
| O55/O157             | 4581403           | s                 | rec    | G2583_4514 | phoU      | CDS        |
| O55/O157             | 4587361           | ns                |        | G2583_4520 | lpfD      | CDS        |

| lineage <sup>a</sup> | site <sup>b</sup> | mutation          |        | gene       | Gene name | Type       |
|----------------------|-------------------|-------------------|--------|------------|-----------|------------|
|                      |                   | type <sup>c</sup> | recomb |            |           |            |
| O55/O157             | 4588117           | s                 |        | G2583_4520 | lpfD      | CDS        |
| O55/O157             | 4588686           | nc                |        | G2583_4521 | lpfC      | pseudogene |
| O55/O157             | 4589045           | nc                |        | G2583_4521 | lpfC      | pseudogene |
| O157                 | 4701796           | nc                |        | G2583_4521 | lpfC      | pseudogene |
| EDL933               | 4772701           | s                 |        | G2583_4523 | stgB      | CDS        |
| O55/O157             | 4703897           | indel             |        | intergenic |           |            |
| O55/O157             | 4591950           | s                 |        | G2583_4524 | lpfA      | CDS        |
| Sakai                | 4705415           | ns                |        | G2583_4525 | glmS      | CDS        |
| O157                 | 4709196           | ns                |        | G2583_4527 | atpC      | CDS        |
| O157                 | 4710217           | s                 |        | G2583_4528 | atpD      | CDS        |
| CB9615               | 4599020           | ns                |        | G2583_4529 | atpG      | CDS        |
| CB9615               | 4599056           | ns                |        | G2583_4529 | atpG      | CDS        |
| O157                 | 4713571           | s                 |        | G2583_4531 | atpH      | CDS        |
| Sakai                | 4714723           | ns                |        | G2583_4534 | atpB      | CDS        |
| CB9615               | 4604524           | ns                |        | G2583_4536 | gidB      | CDS        |
| O157                 | 4717164           | i                 |        | intergenic |           |            |
| O157                 | 4719219           | i                 |        | intergenic |           |            |
| O157                 | 4722625           | s                 |        | G2583_4541 | viaA      | CDS        |
| O157                 | 4723890           | s                 |        | G2583_4542 | ravA      | CDS        |
| CB9615               | 4611994           | ns                |        | G2583_4542 | ravA      | CDS        |
| O157                 | 4724624           | i                 |        | intergenic |           |            |
| O157                 | 4724628           | i                 |        | intergenic |           |            |
| O157                 | 4727841           | ns                |        | G2583_4545 | rbsA      | CDS        |
| CB9615               | 4616599           | ns                |        | G2583_4546 | rbsC      | CDS        |
| O157                 | 4730036           | s                 |        | G2583_4547 | rbsB      | CDS        |
| CB9615               | 4618739           | ns                |        | G2583_4548 | rbsK      | CDS        |
| CB9615               | 4621645           | s                 |        | G2583_4551 | yieP      | CDS        |
| EDL933               | 4805134           | del               |        | G2583_4552 | rrs       | rRNA       |
| EDL933               | 4805653           | nc                |        | G2583_4552 | rrs       | rRNA       |
| O157                 | 4736808           | i                 |        | intergenic |           |            |
| Sakai                | 4737077           | i                 |        | intergenic |           |            |
| CB9615               | 4624599           | i                 |        | intergenic |           |            |
| EDL933               | 4624599           | i                 |        | intergenic |           |            |
| Sakai                | 4624599           | i                 |        | intergenic |           |            |
| EDL933               | 4806264           | nc                |        | G2583_4554 | rri       | rRNA       |
| EDL933               | 4806269           | nc                |        | G2583_4554 | rri       | rRNA       |
| O157                 | 4737503           | nc                |        | G2583_4554 | rri       | rRNA       |
| O55/O157             | 4625208           | indel-14          |        | G2583_4554 | rri       | rRNA       |
| O55/O157             | 4625209           | indel-12          |        | G2583_4554 | rri       | rRNA       |
| CB9615               | 4626386           | ins               |        | G2583_4554 | rri       | rRNA       |
| O157                 | 4740157           | nc                |        | G2583_4555 | rrf       | rRNA       |
| Sakai                | 4740362           | del               |        | G2583_4556 | -         | tRNA       |
| CB9615               | 4629998           | ns                |        | G2583_4560 | yifB      | CDS        |
| O157                 | 4742586           | s                 |        | G2583_4560 | yifB      | CDS        |
| EDL933               | 4815862           | ins               |        | intergenic |           |            |

| lineage <sup>a</sup> | site <sup>b</sup> | mutation          |        | gene            | Gene name   | Type |
|----------------------|-------------------|-------------------|--------|-----------------|-------------|------|
|                      |                   | type <sup>c</sup> | recomb |                 |             |      |
| CB9615               | 4637035           | s                 |        | G2583_4566      | ilvA        | CDS  |
| EDL933               | 4818677           | ins               |        | G2583_4566      | ilvA        | CDS  |
| EDL933               | 4818685           | ins               |        | G2583_4566      | ilvA        | CDS  |
| EDL933               | 4818689           | ins               |        | G2583_4566      | ilvA        | CDS  |
| CB9615               | 4638572           | s                 |        | G2583_4567      | ilvY        | CDS  |
| O157                 | 4751367           | i                 |        | intergenic      |             |      |
| O157                 | 4753270           | i                 |        | intergenic      |             |      |
| CB9615               | 4641660           | s                 |        | G2583_4571      | rep         | CDS  |
| CB9615               | 4644979           | ns                |        | G2583_4572      | gpp         | CDS  |
| O157                 | 4757621           | s                 |        | G2583_4572      | gpp         | CDS  |
| O157                 | 4757979           | ns                |        | G2583_4573      | rhlB        | CDS  |
| CB9615               | 4652627           | s                 |        | G2583_4581      | rffD        | CDS  |
| CB9615               | 4653801           | ns                |        | G2583_4582      | rffG        | CDS  |
| O157                 | 4766939           | ns                |        | G2583_4582      | rffG        | CDS  |
| O157                 | 4769453           | ns                |        | G2583_4585      | rffA        | CDS  |
| O157                 | 4770002           | s                 |        | G2583_4586      | wzxE        | CDS  |
| O157                 | 4770353           | ns                |        | G2583_4586      | wzxE        | CDS  |
| O157                 | 4771600           | ns                |        | G2583_4587      | rffT        | CDS  |
| O157                 | 4771724           | ns                |        | G2583_4587      | rffT        | CDS  |
| CB9615               | 4661744           | i                 |        | intergenic      |             |      |
| O157                 | 4775743           | i                 |        | intergenic      |             |      |
| EDL933               | 4846627           | ins               |        | intergenic      |             |      |
| CB9615               | 4665815           | ns                |        | G2583_4596      | aslA        | CDS  |
| CB9615               | 4666276           | ns                |        | G2583_4596      | aslA        | CDS  |
| O157                 | 4779437           | ns                |        | G2583_4596      | aslA        | CDS  |
| EDL933               | 4848587           | ins               |        | intergenic      |             |      |
| O157                 | 4781580           | ins-18            |        | G2583_4599      | hemX        | CDS  |
| CB9615               | 4671430           | ns                |        | G2583_4601      | hemC        | CDS  |
| EDL933               | 4853567           | ins               |        | intergenic      |             |      |
| O157                 | 4787456           | ns                |        | G2583_4603      | cyaY        | CDS  |
| O157                 | 4796982           | ns                |        | G2583_4614      | -           | CDS  |
| CB9615               | 4685240           | ns                |        | G2583_4615      | -           | CDS  |
| EDL933               | 4868062           | ins               |        | G2583_4618      | -           | CDS  |
| O157                 | 4799496           | ns                |        | G2583_4618      | -           | CDS  |
| O157                 | 4801051           | i                 |        | intergenic      |             |      |
| CB9615               | 4692255           | s                 |        | G2583_4624      | rhtB        | CDS  |
| O157                 | 4805677           | s                 |        | G2583_4625      | pldB        | CDS  |
| CB9615               | 4693751           | ns                |        | G2583_4625-4626 | pldB - yigL | CDS  |
| O157                 | 4806588           | ns                |        | G2583_4626      | yigL        | CDS  |
| CB9615               | 4696138           | s                 |        | G2583_4628      | metR        | CDS  |
| O157                 | 4809964           | s                 |        | G2583_4629      | metE        | CDS  |
| O157                 | 4810439           | ns                |        | G2583_4629      | metE        | CDS  |
| O157                 | 4810988           | ns                |        | G2583_4629      | metE        | CDS  |
| O157                 | 4818901           | s                 |        | G2583_4637      | tatB        | CDS  |
| O157                 | 4824725           | s                 |        | G2583_4643      | fadA        | CDS  |



| lineage <sup>a</sup> | site <sup>b</sup> | mutation          |        | gene       | Gene name | Type       |
|----------------------|-------------------|-------------------|--------|------------|-----------|------------|
|                      |                   | type <sup>c</sup> | recomb |            |           |            |
| CB9615               | 4714416           | i                 |        | intergenic |           |            |
| O157                 | 4827989           | ns                |        | G2583_4645 | pepQ      | CDS        |
| CB9615               | 4715910           | s                 |        | G2583_4646 | yigZ      | CDS        |
| EDL933               | 4898620           | s                 |        | G2583_4647 | trkH      | CDS        |
| O157                 | 4831321           | i                 |        | intergenic |           |            |
| EDL933               | 4900562           | nc                |        | G2583_4649 | rrs       | rRNA       |
| CB9615               | 4719331           | nc                |        | G2583_4649 | rrs       | rRNA       |
| Sakai                | 4833075           | nc                | rec    | G2583_4649 | rrs       | rRNA       |
| Sakai                | 4833206           | i                 | rec    | intergenic |           |            |
| Sakai                | 4833207           | i                 | rec    | intergenic |           |            |
| Sakai                | 4833571           | i                 | rec    | intergenic |           |            |
| Sakai                | 4833572           | i                 | rec    | intergenic |           |            |
| Sakai                | 4833997           | nc                | rec    | G2583_4652 | rri       | rRNA       |
| EDL933               | 4902764           | nc                |        | G2583_4652 | rri       | rRNA       |
| O55/O157             | 4721456           | indel-14          |        | G2583_4652 | rri       | rRNA       |
| O55/O157             | 4721457           | indel-12          |        | G2583_4652 | rri       | rRNA       |
| CB9615               | 4724037           | i                 |        | intergenic |           |            |
| CB9615               | 4724086           | del               |        | intergenic |           |            |
| O157                 | 4836930           | s                 |        | G2583_4654 | mobB      | CDS        |
| O157                 | 4837543           | ns                |        | G2583_4655 | mobA      | CDS        |
| O157                 | 4844012           | s                 |        | G2583_4662 | polA      | CDS        |
| CB9615               | 4732626           | ns                |        | G2583_4662 | polA      | CDS        |
| O157                 | 4847602           | s                 |        | G2583_4666 | yihI      | CDS        |
| CB9615               | 4736541           | s                 |        | G2583_4667 | hemN      | CDS        |
| O157                 | 4851097           | s                 |        | G2583_4668 | glnG      | CDS        |
| O157                 | 4854958           | s                 |        | G2583_4671 | typA      | CDS        |
| O157                 | 4857689           | s                 |        | G2583_4673 | yihM      | CDS        |
| CB9615               | 4746293           | ns                |        | G2583_4674 | yihN      | CDS        |
| CB9615               | 4746715           | ns                |        | G2583_4675 | ompL      | CDS        |
| CB9615               | 4748877           | del-3             |        | G2583_4677 | yihP      | CDS        |
| O157                 | 4862840           | s                 |        | G2583_4677 | yihP      | CDS        |
| O157                 | 4864493           | s                 |        | G2583_4678 | yihQ      | CDS        |
| CB9615               | 4753302           | ns                |        | G2583_4679 | -         | CDS        |
| CB9615               | 4757462           | del               |        | intergenic |           |            |
| O157                 | 4870245           | i                 |        | intergenic |           |            |
| O157                 | 4871067           | ns                |        | G2583_4684 | yihV      | CDS        |
| O157                 | 4876312           | ns                |        | G2583_4690 | -         | CDS        |
| O157                 | 4877355           | i                 |        | intergenic |           |            |
| CB9615               | 4765975           | i                 |        | intergenic |           |            |
| O157                 | 4879930           | s                 |        | G2583_4696 | fdol      | CDS        |
| O157                 | 4882975           | nc                |        | G2583_4698 | fdoG      | pseudogene |
| O157                 | 4885836           | ns                |        | G2583_4700 | yiiG      | CDS        |
| O157                 | 4886787           | s                 |        | G2583_4701 | frvR      | CDS        |
| O157                 | 4887830           | ns                |        | G2583_4701 | frvR      | CDS        |
| CB9615               | 4776461           | del-6             |        | G2583_4702 | frvX      | CDS        |

| lineage <sup>a</sup> | site <sup>b</sup> | mutation          |        | gene       | Gene name | Type       |
|----------------------|-------------------|-------------------|--------|------------|-----------|------------|
|                      |                   | type <sup>c</sup> | recomb |            |           |            |
| CB9615               | 4776712           | ns                |        | G2583_4702 | frvX      | CDS        |
| CB9615               | 4776776           | ns                |        | G2583_4702 | frvX      | CDS        |
| CB9615               | 4777074           | s                 |        | G2583_4703 | frvB      | CDS        |
| O157                 | 4889943           | del-12            |        | G2583_4703 | frvB      | CDS        |
| CB9615               | 4778371           | s                 |        | G2583_4704 | frvA      | CDS        |
| O157                 | 4891246           | ns                |        | G2583_4704 | frvA      | CDS        |
| EDL933               | 4960143           | s                 |        | G2583_4704 | frvA      | CDS        |
| O157                 | 4892004           | ns                |        | G2583_4705 | rafY      | CDS        |
| O157                 | 4893124           | ns                |        | G2583_4705 | rafY      | CDS        |
| CB9615               | 4780665           | ns                |        | G2583_4706 | rhaM      | CDS        |
| CB9615               | 4780780           | ns                |        | G2583_4706 | rhaM      | CDS        |
| CB9615               | 4781673           | ns                |        | G2583_4707 | rhaD      | CDS        |
| O157                 | 4897986           | s                 |        | G2583_4710 | rhaS      | CDS        |
| CB9615               | 4787518           | nc                |        | G2583_4712 | rhaT      | pseudogene |
| O157                 | 4901210           | s                 |        | G2583_4713 | sodA      | CDS        |
| O157                 | 4901282           | s                 |        | G2583_4713 | sodA      | CDS        |
| O157                 | 4901520           | i                 |        | intergenic |           |            |
| O157                 | 4902883           | s                 |        | G2583_4715 | yiiM      | CDS        |
| EDL933               | 4972990           | ns                |        | G2583_4716 | cpxA      | CDS        |
| O157                 | 4906028           | s                 |        | G2583_4718 | cpxP      | CDS        |
| O157                 | 4907301           | s                 |        | G2583_4719 | fieF      | CDS        |
| O157                 | 4909420           | ns                |        | G2583_4722 | sbp       | CDS        |
| EDL933               | 4978364           | ns                |        | G2583_4722 | sbp       | CDS        |
| CB9615               | 4800334           | ns                |        | G2583_4726 | yiiR      | CDS        |
| O157                 | 4913321           | s                 |        | G2583_4728 | uspD      | CDS        |
| CB9615               | 4802739           | ns                |        | G2583_4730 | glpX      | CDS        |
| O157                 | 4915241           | ns                |        | G2583_4730 | glpX      | CDS        |
| O157                 | 4918684           | s                 |        | G2583_4733 | yiiU      | CDS        |
| O157                 | 4919484           | s                 |        | G2583_4734 | -         | CDS        |
| O157                 | 4928376           | i                 |        | intergenic |           |            |
| O157                 | 4928936           | s                 | rec    | G2583_4744 | rhsB      | CDS        |
| O157                 | 4929002           | s                 | rec    | G2583_4744 | rhsB      | CDS        |
| O157                 | 4929010           | ns                | rec    | G2583_4744 | rhsB      | CDS        |
| O157                 | 4929029           | s                 | rec    | G2583_4744 | rhsB      | CDS        |
| O157                 | 4929035           | s                 | rec    | G2583_4744 | rhsB      | CDS        |
| O157                 | 4929079           | ns                | rec    | G2583_4744 | rhsB      | CDS        |
| EDL933               | 4998103           | ins               |        | G2583_4744 | rhsB      | CDS        |
| CB9615               | 4817350           | ns                |        | G2583_4744 | rhsB      | CDS        |
| EDL933               | 4998719           | ns                | rec    | G2583_4744 | rhsB      | CDS        |
| EDL933               | 4998724           | s                 | rec    | G2583_4744 | rhsB      | CDS        |
| EDL933               | 4998734           | ins               | rec    | G2583_4744 | rhsB      | CDS        |
| EDL933               | 4998756           | ns                | rec    | G2583_4744 | rhsB      | CDS        |
| EDL933               | 4999680           | ns                | rec    | G2583_4744 | rhsB      | CDS        |
| O55/O157             | 4819350           | s                 | rec    | G2583_4744 | rhsB      | CDS        |
| O55/O157             | 4819407           | s                 | rec    | G2583_4744 | rhsB      | CDS        |

| lineage <sup>a</sup> | site <sup>b</sup> | mutation          |        | gene       | Gene name | Type |
|----------------------|-------------------|-------------------|--------|------------|-----------|------|
|                      |                   | type <sup>c</sup> | recomb |            |           |      |
| O55/O157             | 4819410           | s                 | rec    | G2583_4744 | rhsB      | CDS  |
| O55/O157             | 4819469           | ns                | rec    | G2583_4744 | rhsB      | CDS  |
| O55/O157             | 4819626           | s                 | rec    | G2583_4744 | rhsB      | CDS  |
| O55/O157             | 4819641           | s                 | rec    | G2583_4744 | rhsB      | CDS  |
| O55/O157             | 4819643           | ns                | rec    | G2583_4744 | rhsB      | CDS  |
| CB9615               | 4820063           | ns                |        | G2583_4744 | rhsB      | CDS  |
| O157                 | 4932964           | ns                |        | G2583_4744 | rhsB      | CDS  |
| EDL933               | 5004050           | i                 | rec    | intergenic |           |      |
| EDL933               | 5004529           | s                 | rec    | G2583_4751 | metB      | CDS  |
| O157                 | 4935796           | s                 |        | G2583_4751 | metB      | CDS  |
| CB9615               | 4823757           | ns                |        | G2583_4751 | metB      | CDS  |
| O157                 | 4936980           | s                 |        | G2583_4752 | metL      | CDS  |
| O157                 | 4938288           | s                 |        | G2583_4752 | metL      | CDS  |
| O157                 | 4939449           | i                 |        | intergenic |           |      |
| O157                 | 4939502           | ns                |        | G2583_4753 | metF      | CDS  |
| CB9615               | 4828448           | s                 |        | G2583_4754 | katG      | CDS  |
| CB9615               | 4829724           | ns                |        | G2583_4754 | katG      | CDS  |
| CB9615               | 4831762           | ns                |        | G2583_4756 | yijF      | CDS  |
| O157                 | 4945738           | s                 |        | G2583_4757 | gldA      | CDS  |
| O157                 | 4950150           | ns                |        | G2583_4761 | frwC      | CDS  |
| O157                 | 4952636           | ns                |        | G2583_4763 | pflD      | CDS  |
| O157                 | 4954297           | ns                |        | G2583_4765 | frwD      | CDS  |
| O157                 | 4955502           | ns                |        | G2583_4767 | yijP      | CDS  |
| O157                 | 4958068           | s                 |        | G2583_4768 | ppc       | CDS  |
| CB9615               | 4849469           | ns                |        | G2583_4770 | argC      | CDS  |
| O157                 | 4962486           | s                 |        | G2583_4770 | argC      | CDS  |
| EDL933               | 5032559           | s                 |        | G2583_4772 | argH      | CDS  |
| O157                 | 4964826           | ns                |        | G2583_4772 | argH      | CDS  |
| CB9615               | 4853031           | ns                |        | G2583_4774 | oxyR      | CDS  |
| O157                 | 4966334           | ns                |        | G2583_4775 | sthA      | CDS  |
| CB9615               | 4855289           | i                 |        | intergenic |           |      |
| O157                 | 4967663           | i                 |        | intergenic |           |      |
| O157                 | 4968734           | s                 |        | G2583_4776 | -         | CDS  |
| O157                 | 4973232           | ns                |        | G2583_4781 | btuB      | CDS  |
| EDL933               | 5044458           | i                 | rec    | intergenic |           |      |
| EDL933               | 5044499           | i                 | rec    | intergenic |           |      |
| EDL933               | 5044505           | i                 | rec    | intergenic |           |      |
| EDL933               | 5044509           | i                 | rec    | intergenic |           |      |
| EDL933               | 5044511           | i                 | rec    | intergenic |           |      |
| EDL933               | 5044512           | del               | rec    | intergenic |           |      |
| EDL933               | 5044516           | i                 | rec    | intergenic |           |      |
| EDL933               | 5044521           | i                 | rec    | intergenic |           |      |
| EDL933               | 5044523           | i                 | rec    | intergenic |           |      |
| EDL933               | 5044524           | i                 | rec    | intergenic |           |      |
| EDL933               | 5044528           | del-2             | rec    | intergenic |           |      |

| lineage <sup>a</sup> | site <sup>b</sup> | mutation          |        | gene       | Gene name | Type |
|----------------------|-------------------|-------------------|--------|------------|-----------|------|
|                      |                   | type <sup>c</sup> | recomb |            |           |      |
| EDL933               | 5044529           | i                 | rec    | intergenic |           |      |
| EDL933               | 5044533           | i                 | rec    | intergenic |           |      |
| EDL933               | 5044534           | i                 | rec    | intergenic |           |      |
| EDL933               | 5044537           | i                 | rec    | intergenic |           |      |
| EDL933               | 5044538           | i                 | rec    | intergenic |           |      |
| EDL933               | 5044539           | i                 | rec    | intergenic |           |      |
| EDL933               | 5044542           | i                 | rec    | intergenic |           |      |
| EDL933               | 5044543           | i                 | rec    | intergenic |           |      |
| EDL933               | 5044679           | i                 | rec    | intergenic |           |      |
| O157                 | 4977348           | nc                |        | G2583_4783 | rrs       | rRNA |
| O157                 | 4977483           | i                 |        | intergenic |           |      |
| CB9615               | 4865163           | i                 |        | intergenic |           |      |
| CB9615               | 4865334           | i                 |        | intergenic |           |      |
| CB9615               | 4865601           | nc                |        | G2583_4785 | rri       | rRNA |
| CB9615               | 4865606           | nc                |        | G2583_4785 | rri       | rRNA |
| EDL933               | 5046849           | nc                |        | G2583_4785 | rri       | rRNA |
| O157                 | 4978178           | nc                |        | G2583_4785 | rri       | rRNA |
| O55/O157             | 4866005           | indel-12          |        | G2583_4785 | rri       | rRNA |
| O55/O157             | 4866016           | indel-14          |        | G2583_4785 | rri       | rRNA |
| O157                 | 4980832           | nc                |        | G2583_4786 | rrf       | rRNA |
| CB9615               | 4868556           | nc                |        | G2583_4786 | rrf       | rRNA |
| EDL933               | 5052468           | s                 |        | G2583_4789 | coaA      | CDS  |
| EDL933               | 5052789           | del-17            |        | G2583_4789 | coaA      | CDS  |
| EDL933               | 5054039           | s                 | rec    | G2583_4795 | tufB      | CDS  |
| EDL933               | 5054048           | s                 | rec    | G2583_4795 | tufB      | CDS  |
| EDL933               | 5054051           | s                 | rec    | G2583_4795 | tufB      | CDS  |
| EDL933               | 5054055           | ns                | rec    | G2583_4795 | tufB      | CDS  |
| EDL933               | 5054066           | s                 | rec    | G2583_4795 | tufB      | CDS  |
| EDL933               | 5054070           | s                 | rec    | G2583_4795 | tufB      | CDS  |
| CB9615               | 4873168           | s                 |        | G2583_4795 | tufB      | CDS  |
| O157                 | 4985546           | s                 |        | G2583_4795 | tufB      | CDS  |
| O157                 | 4999070           | ns                |        | G2583_4805 | yjaZ      | CDS  |
| O157                 | 5001585           | s                 |        | G2583_4809 | thiS      | CDS  |
| CB9615               | 4891021           | ns                |        | G2583_4812 | thiC      | CDS  |
| O157                 | 5006606           | s                 |        | G2583_4815 | hemE      | CDS  |
| O157                 | 5007108           | ns                |        | G2583_4815 | hemE      | CDS  |
| O157                 | 5008885           | ns                |        | G2583_4817 | yjaG      | CDS  |
| O157                 | 5009583           | ns                |        | G2583_4819 | yjaH      | CDS  |
| O157                 | 5009945           | s                 |        | G2583_4819 | yjaH      | CDS  |
| O157                 | 5012872           | ns                |        | G2583_4822 | zraR      | CDS  |
| CB9615               | 4903215           | s                 |        | G2583_4824 | purH      | CDS  |
| O157                 | 5016799           | i                 |        | intergenic |           |      |
| EDL933               | 5086700           | nc                | rec    | G2583_4825 | rrs       | rRNA |
| EDL933               | 5086704           | nc                | rec    | G2583_4825 | rrs       | rRNA |
| EDL933               | 5086708           | nc                | rec    | G2583_4825 | rrs       | rRNA |

| lineage <sup>a</sup> | site <sup>b</sup> | mutation          |        | gene       | Gene name | Type       |
|----------------------|-------------------|-------------------|--------|------------|-----------|------------|
|                      |                   | type <sup>c</sup> | recomb |            |           |            |
| EDL933               | 5086717           | nc                | rec    | G2583_4825 | rrs       | rRNA       |
| EDL933               | 5086718           | nc                | rec    | G2583_4825 | rrs       | rRNA       |
| EDL933               | 5086719           | nc                | rec    | G2583_4825 | rrs       | rRNA       |
| EDL933               | 5086720           | nc                | rec    | G2583_4825 | rrs       | rRNA       |
| EDL933               | 5086721           | nc                | rec    | G2583_4825 | rrs       | rRNA       |
| EDL933               | 5086736           | nc                | rec    | G2583_4825 | rrs       | rRNA       |
| EDL933               | 5018374           | nc                |        | G2583_4825 | rrs       | rRNA       |
| O157                 | 5018374           | nc                |        | G2583_4825 | rrs       | rRNA       |
| Sakai                | 5018374           | nc                |        | G2583_4825 | rrs       | rRNA       |
| O157                 | 5018509           | i                 |        | intergenic |           |            |
| EDL933               | 5018779           | i                 |        | intergenic |           |            |
| O157                 | 5018779           | i                 |        | intergenic |           |            |
| Sakai                | 5018779           | i                 |        | intergenic |           |            |
| CB9615               | 4906446           | i                 |        | intergenic |           |            |
| O157                 | 5018811           | ins-18            |        | intergenic |           |            |
| O55/O157             | 4906451           | indel-8           |        | intergenic |           |            |
| O157                 | 5019204           | nc                |        | G2583_4827 | rriI      | rRNA       |
| Sakai                | 5019389           | ins-14            |        | G2583_4827 | rriI      | rRNA       |
| Sakai                | 5019402           | del-12            |        | G2583_4827 | rriI      | rRNA       |
| EDL933               | 5088734           | nc                |        | G2583_4827 | rriI      | rRNA       |
| CB9615               | 4907989           | nc                |        | G2583_4827 | rriI      | rRNA       |
| O157                 | 5023716           | i                 |        | intergenic |           |            |
| O157                 | 5024166           | ns                |        | G2583_4831 | aceB      | CDS        |
| CB9615               | 4913123           | ins-10            |        | G2583_4832 | aceA      | CDS        |
| O157                 | 5028109           | s                 |        | G2583_4833 | aceK      | CDS        |
| CB9615               | 4917270           | nc                |        | G2583_4834 | arp       | pseudogene |
| CB9615               | 4917280           | del               |        | G2583_4834 | arp       | pseudogene |
| O157                 | 5029898           | nc                |        | G2583_4834 | arp       | pseudogene |
| CB9615               | 4918082           | nc                |        | G2583_4834 | arp       | pseudogene |
| O157                 | 5030718           | nc                |        | G2583_4834 | arp       | pseudogene |
| CB9615               | 4918467           | nc                |        | G2583_4834 | arp       | pseudogene |
| O157                 | 5031093           | i                 |        | intergenic |           |            |
| EDL933               | 5099867           | ins               |        | intergenic |           |            |
| CB9615               | 4919667           | del               |        | intergenic |           |            |
| CB9615               | 4919690           | i                 |        | intergenic |           |            |
| O157                 | 5036147           | ns                |        | G2583_4837 | yjbB      | CDS        |
| O157                 | 5037395           | ns                |        | G2583_4837 | yjbB      | CDS        |
| CB9615               | 4926188           | i                 |        | intergenic |           |            |
| O157                 | 5081419           | s                 |        | G2583_4844 | sorF      | CDS        |
| O157                 | 5083289           | ns                |        | G2583_4846 | -         | CDS        |
| CB9615               | 4932874           | s                 |        | G2583_4847 | rluF      | CDS        |
| CB9615               | 4935166           | ns                |        | G2583_4849 | lysC      | CDS        |
| O157                 | 5089027           | i                 |        | intergenic |           |            |
| O157                 | 5090702           | ns                |        | G2583_4853 | yjbG      | CDS        |
| O157                 | 5091692           | ns                |        | G2583_4854 | yjbH      | CDS        |

| lineage <sup>a</sup> | site <sup>b</sup> | mutation          |        | gene       | Gene name | Type       |
|----------------------|-------------------|-------------------|--------|------------|-----------|------------|
|                      |                   | type <sup>c</sup> | recomb |            |           |            |
| O157                 | 5093259           | i                 |        | intergenic |           |            |
| CB9615               | 4942298           | i                 |        | intergenic |           |            |
| CB9615               | 4944661           | i                 |        | intergenic |           |            |
| O157                 | 5097893           | ns                |        | G2583_4858 | malF      | CDS        |
| O157                 | 5099962           | i                 |        | intergenic |           |            |
| O157                 | 5103794           | i                 |        | intergenic |           |            |
| CB9615               | 4952672           | i                 |        | intergenic |           |            |
| Sakai                | 5106168           | ns                |        | G2583_4864 | ubiC      | CDS        |
| O157                 | 5111653           | ns                |        | G2583_4869 | dinF      | CDS        |
| O157                 | 5111998           | ns                |        | G2583_4869 | dinF      | CDS        |
| CB9615               | 4961064           | s                 |        | G2583_4869 | dinF      | CDS        |
| CB9615               | 4961624           | ns                |        | G2583_4871 | zur       | CDS        |
| O157                 | 5112844           | s                 |        | G2583_4871 | zur       | CDS        |
| CB9615               | 4962679           | ns                |        | G2583_4872 | yjbM      | CDS        |
| Sakai                | 5114397           | ins               |        | G2583_4872 | yjbM      | CDS        |
| CB9615               | 4963389           | i                 |        | intergenic |           |            |
| CB9615               | 4965275           | i                 |        | intergenic |           |            |
| EDL933               | 5149793           | s                 |        | G2583_4877 | alr       | CDS        |
| O157                 | 5121942           | ns                |        | G2583_4879 | -         | CDS        |
| CB9615               | 4972424           | s                 |        | G2583_4881 | yjbQ      | CDS        |
| O157                 | 5128634           | s                 |        | G2583_4886 | yjcC      | CDS        |
| CB9615               | 4977688           | ns                |        | G2583_4886 | yjcC      | CDS        |
| CB9615               | 4977692           | ns                |        | G2583_4886 | yjcC      | CDS        |
| O157                 | 5129239           | ns                |        | G2583_4886 | yjcC      | CDS        |
| O157                 | 5129585           | s                 |        | G2583_4886 | yjcC      | CDS        |
| O157                 | 5129966           | s                 |        | G2583_4886 | yjcC      | CDS        |
| CB9615               | 4981185           | ns                |        | G2583_4889 | yjcD      | CDS        |
| CB9615               | 4983408           | ns                |        | G2583_4890 | yjcE      | CDS        |
| O157                 | 5135368           | ns                |        | G2583_4891 | yjcF      | CDS        |
| O157                 | 5135792           | s                 |        | G2583_4891 | yjcF      | CDS        |
| CB9615               | 4984805           | ns                |        | G2583_4891 | yjcF      | CDS        |
| O157                 | 5136147           | ns                |        | G2583_4891 | yjcF      | CDS        |
| O157                 | 5137163           | s                 |        | G2583_4892 | actP      | CDS        |
| O157                 | 5137547           | s                 |        | G2583_4892 | actP      | CDS        |
| CB9615               | 4989224           | ns                |        | G2583_4894 | acs       | CDS        |
| O157                 | 5140813           | i                 |        | intergenic |           |            |
| CB9615               | 4992682           | ns                |        | G2583_4898 | nrfD      | CDS        |
| O157                 | 5143833           | ns                |        | G2583_4898 | nrfD      | CDS        |
| O157                 | 5143897           | s                 |        | G2583_4898 | nrfD      | CDS        |
| CB9615               | 4992917           | s                 |        | G2583_4898 | nrfD      | CDS        |
| O157                 | 5145755           | s                 |        | G2583_4899 | nrfE      | CDS        |
| CB9615               | 4997948           | i                 |        | intergenic |           |            |
| O157                 | 5150197           | nc                |        | G2583_4904 | fdhF      | pseudogene |
| O157                 | 5154019           | ns                |        | G2583_4906 | mdtO      | CDS        |
| CB9615               | 5003754           | ns                |        | G2583_4906 | mdtO      | CDS        |

| lineage <sup>a</sup> | site <sup>b</sup> | mutation          |        | gene       | Gene name | Type       |
|----------------------|-------------------|-------------------|--------|------------|-----------|------------|
|                      |                   | type <sup>c</sup> | recomb |            |           |            |
| CB9615               | 5004933           | nc                |        | G2583_4907 | mdtN      | pseudogene |
| O157                 | 5158150           | ns                |        | G2583_4909 | yjcS      | CDS        |
| CB9615               | 5007295           | s                 |        | G2583_4909 | yjcS      | CDS        |
| CB9615               | 5009318           | s                 |        | G2583_4911 | PfkB      | CDS        |
| O157                 | 5160539           | ns                |        | G2583_4911 | PfkB      | CDS        |
| O157                 | 5161881           | s                 |        | G2583_4912 | -         | CDS        |
| O157                 | 5163907           | ns                |        | G2583_4915 | -         | CDS        |
| O157                 | 5165067           | ns                |        | G2583_4916 | -         | CDS        |
| O157                 | 5165695           | s                 |        | G2583_4916 | -         | CDS        |
| O157                 | 5167109           | ins-9             |        | G2583_4917 | -         | CDS        |
| O157                 | 5168127           | ns                |        | G2583_4917 | -         | CDS        |
| O157                 | 5168910           | ns                |        | G2583_4918 | yjdP      | CDS        |
| CB9615               | 5017795           | ns                |        | G2583_4918 | yjdP      | CDS        |
| O157                 | 5170377           | ins               |        | G2583_4920 | phnO      | CDS        |
| O157                 | 5171650           | ns                |        | G2583_4922 | phnM      | CDS        |
| CB9615               | 5022664           | ns                |        | G2583_4925 | phnJ      | CDS        |
| O157                 | 5174015           | s                 |        | G2583_4925 | phnJ      | CDS        |
| O157                 | 5175333           | s                 |        | G2583_4926 | phnI      | CDS        |
| CB9615               | 5025121           | s                 |        | G2583_4928 | phnG      | CDS        |
| CB9615               | 5027617           | ns                |        | G2583_4931 | phnD      | CDS        |
| O157                 | 5178885           | s                 |        | G2583_4931 | phnD      | CDS        |
| CB9615               | 5032653           | ns                |        | G2583_4936 | yjcZ      | CDS        |
| Sakai                | 5188884           | ns                |        | G2583_4940 | eptA      | CDS        |
| CB9615               | 5037696           | s                 |        | G2583_4940 | eptA      | CDS        |
| CB9615               | 5037986           | ns                |        | G2583_4940 | eptA      | CDS        |
| O157                 | 5189869           | s                 |        | G2583_4940 | eptA      | CDS        |
| O157                 | 5191662           | s                 |        | G2583_4942 | adiY      | CDS        |
| O157                 | 5192313           | s                 |        | G2583_4942 | adiY      | CDS        |
| CB9615               | 5045438           | ns                |        | G2583_4945 | melA      | CDS        |
| CB9615               | 5045536           | ns                |        | G2583_4945 | melA      | CDS        |
| O157                 | 5200162           | ns                |        | G2583_4948 | fumB      | CDS        |
| O157                 | 5200942           | ns                |        | G2583_4948 | fumB      | CDS        |
| O157                 | 5201064           | ns                |        | G2583_4948 | fumB      | CDS        |
| CB9615               | 5050071           | ns                |        | G2583_4948 | fumB      | CDS        |
| EDL933               | 5232540           | ns                |        | G2583_4949 | dcuB      | CDS        |
| O157                 | 5203708           | i                 |        | intergenic |           |            |
| CB9615               | 5055429           | ns                |        | G2583_4953 | yjdJ      | CDS        |
| O157                 | 5207335           | i                 |        | intergenic |           |            |
| CB9615               | 5059740           | s                 |        | G2583_4958 | cadA      | CDS        |
| CB9615               | 5061372           | s                 |        | G2583_4958 | cadA      | CDS        |
| CB9615               | 5064876           | s                 |        | G2583_4960 | cadC      | CDS        |
| O157                 | 5217021           | nc                |        | G2583_4961 | -         | tRNA       |
| CB9615               | 5066021           | ns                |        | G2583_4962 | yjdC      | CDS        |
| O157                 | 5218707           | ns                |        | G2583_4963 | dipZ      | CDS        |
| O157                 | 5218749           | ns                |        | G2583_4963 | dipZ      | CDS        |

| lineage <sup>a</sup> | site <sup>b</sup> | mutation          |        | gene       | Gene name | Type |
|----------------------|-------------------|-------------------|--------|------------|-----------|------|
|                      |                   | type <sup>c</sup> | recomb |            |           |      |
| O157                 | 5219396           | ns                |        | G2583_4963 | dipZ      | CDS  |
| O157                 | 5224725           | ns                |        | G2583_4968 | yjeH      | CDS  |
| O157                 | 5227086           | s                 |        | G2583_4970 | groL      | CDS  |
| O157                 | 5227092           | s                 |        | G2583_4970 | groL      | CDS  |
| O157                 | 5231058           | ns                |        | G2583_4977 | sugE      | CDS  |
| CB9615               | 5081156           | ns                |        | G2583_4979 | ampC      | CDS  |
| O157                 | 5234120           | s                 |        | G2583_4982 | frdB      | CDS  |
| O157                 | 5234975           | ns                |        | G2583_4983 | frdA      | CDS  |
| O157                 | 5235900           | s                 |        | G2583_4983 | frdA      | CDS  |
| CB9615               | 5084832           | ns                |        | G2583_4983 | frdA      | CDS  |
| O157                 | 5239210           | s                 |        | G2583_4985 | yjeM      | CDS  |
| CB9615               | 5094438           | i                 |        | intergenic |           |      |
| O157                 | 5246821           | s                 |        | G2583_4993 | yjeS      | CDS  |
| O157                 | 5248084           | s                 |        | G2583_4994 | yjeF      | CDS  |
| O157                 | 5250352           | ns                |        | G2583_4996 | amiB      | CDS  |
| O157                 | 5252285           | s                 |        | G2583_4997 | mutL      | CDS  |
| O157                 | 5252774           | s                 |        | G2583_4997 | mutL      | CDS  |
| O157                 | 5252841           | ns                |        | G2583_4997 | mutL      | CDS  |
| O157                 | 5253752           | ns                |        | G2583_4998 | miaA      | CDS  |
| O157                 | 5257352           | s                 |        | G2583_5002 | hfIC      | CDS  |
| EDL933               | 5289877           | ins               |        | intergenic |           |      |
| O157                 | 5261225           | s                 |        | G2583_5006 | rnr       | CDS  |
| O157                 | 5262270           | ns                |        | G2583_5006 | rnr       | CDS  |
| CB9615               | 5112762           | ns                |        | G2583_5009 | yjfJ      | CDS  |
| CB9615               | 5113491           | ns                |        | G2583_5010 | yjfK      | CDS  |
| O157                 | 5265360           | ns                |        | G2583_5010 | yjfK      | CDS  |
| EDL933               | 5299595           | s                 |        | G2583_5014 | aidB      | CDS  |
| O157                 | 5271154           | ns                |        | G2583_5017 | yjfP      | CDS  |
| O157                 | 5271255           | ns                |        | G2583_5017 | yjfP      | CDS  |
| CB9615               | 5119958           | s                 |        | G2583_5018 | ulaR      | CDS  |
| O157                 | 5274770           | ns                |        | G2583_5020 | ulaA      | CDS  |
| EDL933               | 5307104           | s                 |        | G2583_5024 | ulaE      | CDS  |
| EDL933               | 5309620           | ns                |        | G2583_5029 | rpsR      | CDS  |
| O157                 | 5282664           | ns                |        | G2583_5035 | ydcM      | CDS  |
| O157                 | 5282945           | ns                |        | G2583_5035 | ydcM      | CDS  |
| CB9615               | 5131507           | ns                |        | G2583_5035 | ydcM      | CDS  |
| O157                 | 5283352           | s                 |        | G2583_5035 | ydcM      | CDS  |
| O157                 | 5283861           | ns                |        | G2583_5036 | ytfB      | CDS  |
| O157                 | 5284141           | s                 |        | G2583_5036 | ytfB      | CDS  |
| O157                 | 5286135           | s                 |        | G2583_5038 | cycA      | CDS  |
| EDL933               | 5317485           | i                 |        | intergenic |           |      |
| CB9615               | 5135921           | i                 |        | intergenic |           |      |
| O157                 | 5288578           | i                 |        | intergenic |           |      |
| CB9615               | 5137189           | s                 |        | G2583_5041 | ytfG      | CDS  |
| CB9615               | 5140559           | i                 |        | intergenic |           |      |



| lineage <sup>a</sup> | site <sup>b</sup> | mutation          |        | gene       | Gene name | Type |
|----------------------|-------------------|-------------------|--------|------------|-----------|------|
|                      |                   | type <sup>c</sup> | recomb |            |           |      |
| CB9615               | 5140709           | ns                |        | G2583_5044 | cysQ      | CDS  |
| CB9615               | 5141284           | s                 |        | G2583_5044 | cysQ      | CDS  |
| O157                 | 5293138           | i                 |        | intergenic |           |      |
| Sakai                | 5293337           | s                 |        | G2583_5045 | ytfI      | CDS  |
| CB9615               | 5143702           | del-17            |        | intergenic |           |      |
| O157                 | 5299877           | s                 |        | G2583_5051 | ytfN      | CDS  |
| EDL933               | 5300432           | ns                |        | G2583_5051 | ytfN      | CDS  |
| O157                 | 5300432           | ns                |        | G2583_5051 | ytfN      | CDS  |
| Sakai                | 5300432           | ns                |        | G2583_5051 | ytfN      | CDS  |
| CB9615               | 5149452           | ns                |        | G2583_5051 | ytfN      | CDS  |
| O157                 | 5303128           | s                 |        | G2583_5051 | ytfN      | CDS  |
| O157                 | 5303294           | s                 |        | G2583_5051 | ytfN      | CDS  |
| CB9615               | 5154071           | s                 |        | G2583_5057 | ytfQ      | CDS  |
| O157                 | 5307634           | ns                |        | G2583_5058 | ytfR      | CDS  |
| O157                 | 5310581           | ns                |        | G2583_5061 | fbp       | CDS  |
| Sakai                | 5311572           | ns                |        | G2583_5062 | mpl       | CDS  |
| O157                 | 5311630           | s                 |        | G2583_5062 | mpl       | CDS  |
| CB9615               | 5164331           | i                 |        | intergenic |           |      |
| O157                 | 5318359           | i                 |        | intergenic |           |      |
| CB9615               | 5167333           | s                 |        | G2583_5068 | treC      | CDS  |
| CB9615               | 5167675           | s                 |        | G2583_5068 | treC      | CDS  |
| O157                 | 5319301           | ns                |        | G2583_5068 | treC      | CDS  |
| CB9615               | 5169276           | ns                |        | G2583_5069 | treB      | CDS  |
| O157                 | 5321883           | ns                |        | G2583_5070 | treR      | CDS  |
| EDL933               | 5352814           | del               |        | G2583_5071 | -         | CDS  |
| EDL933               | 5352840           | ns                |        | G2583_5071 | -         | CDS  |
| CB9615               | 5175296           | ns                |        | G2583_5074 | pyrI      | CDS  |
| O157                 | 5328187           | i                 |        | intergenic |           |      |
| O157                 | 5330104           | ns                |        | G2583_5081 | yjgJ      | CDS  |
| O157                 | 5330335           | i                 |        | intergenic |           |      |
| CB9615               | 5179489           | ns                |        | G2583_5083 | yjgL      | CDS  |
| O157                 | 5331428           | ns                |        | G2583_5083 | yjgL      | CDS  |
| O157                 | 5331593           | ns                | rec    | G2583_5083 | yjgL      | CDS  |
| O157                 | 5331599           | ns                | rec    | G2583_5083 | yjgL      | CDS  |
| O157                 | 5331610           | ns                | rec    | G2583_5083 | yjgL      | CDS  |
| Sakai                | 5331610           | del-18            |        | G2583_5083 | yjgL      | CDS  |
| O157                 | 5331610           | ns                | rec    | G2583_5083 | yjgL      | CDS  |
| O157                 | 5331610           | ns                | rec    | G2583_5083 | yjgL      | CDS  |
| O157                 | 5331610           | ns                | rec    | G2583_5083 | yjgL      | CDS  |
| O157                 | 5331611           | ns                | rec    | G2583_5083 | yjgL      | CDS  |
| O157                 | 5331612           | ns                | rec    | G2583_5083 | yjgL      | CDS  |
| O157                 | 5331613           | ns                | rec    | G2583_5083 | yjgL      | CDS  |
| O157                 | 5331617           | ns                | rec    | G2583_5083 | yjgL      | CDS  |
| O157                 | 5331629           | ns                | rec    | G2583_5083 | yjgL      | CDS  |
| O157                 | 5331630           | ns                | rec    | G2583_5083 | yjgL      | CDS  |

| lineage <sup>a</sup> | site <sup>b</sup> | mutation          |        | gene       | Gene name | Type |
|----------------------|-------------------|-------------------|--------|------------|-----------|------|
|                      |                   | type <sup>c</sup> | recomb |            |           |      |
| O157                 | 5331631           | ns                | rec    | G2583_5083 | yjgL      | CDS  |
| O157                 | 5332754           | i                 |        | intergenic |           |      |
| CB9615               | 5184038           | ns                |        | G2583_5087 | yjgN      | CDS  |
| O157                 | 5335551           | ns                |        | G2583_5087 | yjgN      | CDS  |
| O157                 | 5338146           | s                 |        | G2583_5088 | valS      | CDS  |
| Sakai                | 5344115           | i                 |        | intergenic |           |      |
| CB9615               | 5195096           | ns                |        | G2583_5094 | yjgB      | CDS  |
| EDL933               | 5379093           | ns                |        | ECs5242    | -         | CDS  |
| EDL933               | 5379098           | ns                |        | ECs5242    | -         | CDS  |
| EDL933               | 5379101           | ns                |        | ECs5242    | -         | CDS  |
| EDL933               | 5385484           | ns                |        | ECs5251    | -         | CDS  |
| O157                 | 5357913           | ns                |        | G2583_5096 | -         | CDS  |
| O157                 | 5357951           | s                 |        | G2583_5096 | -         | CDS  |
| O157                 | 5359174           | ns                |        | G2583_5098 | -         | CDS  |
| O157                 | 5360362           | ns                |        | G2583_5100 | -         | CDS  |
| O157                 | 5360787           | s                 |        | G2583_5100 | -         | CDS  |
| O157                 | 5361933           | s                 |        | G2583_5101 | -         | CDS  |
| CB9615               | 5202015           | i                 |        | intergenic |           |      |
| CB9615               | 5207132           | ns                |        | G2583_5104 | -         | CDS  |
| CB9615               | 5210475           | s                 |        | G2583_5104 | -         | CDS  |
| CB9615               | 5213308           | s                 |        | G2583_5105 | -         | CDS  |
| O157                 | 5376424           | s                 |        | G2583_5105 | -         | CDS  |
| CB9615               | 5216001           | s                 |        | G2583_5106 | -         | CDS  |
| CB9615               | 5218098           | ns                |        | G2583_5106 | -         | CDS  |
| CB9615               | 5221461           | ns                |        | G2583_5107 | -         | CDS  |
| CB9615               | 5221567           | ns                |        | G2583_5107 | -         | CDS  |
| O157                 | 5383688           | ns                |        | G2583_5107 | -         | CDS  |
| CB9615               | 5222654           | s                 |        | G2583_5107 | -         | CDS  |
| CB9615               | 5223426           | ns                |        | G2583_5107 | -         | CDS  |
| CB9615               | 5223874           | ns                |        | G2583_5107 | -         | CDS  |
| CB9615               | 5225623           | ns                |        | G2583_5107 | -         | CDS  |
| CB9615               | 5228495           | i                 |        | intergenic |           |      |
| O157                 | 5394737           | i                 |        | intergenic |           |      |
| CB9615               | 5233141           | i                 |        | intergenic |           |      |
| O157                 | 5395824           | i                 |        | intergenic |           |      |
| O157                 | 5396395           | s                 |        | G2583_5113 | fimB      | CDS  |
| O157                 | 5397208           | s                 |        | G2583_5114 | fimE      | CDS  |
| O157                 | 5397653           | del-16            |        | intergenic |           |      |
| CB9615               | 5236058           | i                 |        | intergenic |           |      |
| CB9615               | 5236106           | i                 |        | intergenic |           |      |
| O157                 | 5397827           | i                 |        | intergenic |           |      |
| Sakai                | 5398304           | ns                |        | G2583_5115 | fimA      | CDS  |
| CB9615               | 5236754           | s                 |        | G2583_5115 | fimA      | CDS  |
| CB9615               | 5236978           | ns                |        | G2583_5116 | fimI      | CDS  |
| O157                 | 5398698           | ns                |        | G2583_5116 | fimI      | CDS  |

| lineage <sup>a</sup> | site <sup>b</sup> | mutation          |        | gene            | Gene name | Type       |
|----------------------|-------------------|-------------------|--------|-----------------|-----------|------------|
|                      |                   | type <sup>c</sup> | recomb |                 |           |            |
| O157                 | 5398749           | ns                |        | G2583_5116      | fimI      | CDS        |
| CB9615               | 5238564           | s                 |        | G2583_5118      | fimD      | CDS        |
| O157                 | 5401773           | ns                |        | G2583_5118      | fimD      | CDS        |
| CB9615               | 5241300           | s                 |        | G2583_5119      | fimF      | CDS        |
| O157                 | 5404166           | ns                |        | G2583_5121      | fimH      | CDS        |
| EDL933               | 5437265           | ns                |        | G2583_5123      | uxuA      | CDS        |
| EDL933               | 5437301           | ns                |        | G2583_5123      | uxuA      | CDS        |
| O157                 | 5407638           | ns                |        | G2583_5123      | uxuA      | CDS        |
| EDL933               | 5437694           | ins               |        | intergenic      |           |            |
| CB9615               | 5247933           | s                 |        | G2583_5125      | uxuR      | CDS        |
| O157                 | 5412547           | ns                |        | G2583_5129      | yjiE      | CDS        |
| CB9615               | 5252977           | ns                |        | G2583_5131      | yjiG      | CDS        |
| CB9615               | 5254071           | s                 |        | G2583_5133      | yjiI      | CDS        |
| O157                 | 5415953           | del               |        | G2583_5133      | yjiI      | CDS        |
| CB9615               | 5255263           | s                 |        | G2583_5134      | yeeJ      | CDS        |
| O157                 | 5421522           | ins               |        | G2583_5134      | yeeJ      | CDS        |
| O157                 | 5424816           | ns                |        | G2583_5137      | -         | CDS        |
| CB9615               | 5263664           | ns                |        | G2583_5137      | -         | CDS        |
| EDL933               | 5456090           | del-12            |        | G2583_5137      | -         | CDS        |
| CB9615               | 5264393           | ns                |        | G2583_5137      | -         | CDS        |
| O157                 | 5427094           | i                 |        | intergenic      |           |            |
| CB9615               | 5265456           | ns                |        | G2583_5139      | yjiL      | CDS        |
| Sakai                | 5428580           | s                 |        | G2583_5140      | yjiM      | CDS        |
| O157                 | 5428887           | ns                |        | G2583_5140      | yjiM      | CDS        |
| EDL933               | 5459043           | ins               |        | intergenic      |           |            |
| O157                 | 5429478           | del-9             |        | G2583_5141      | yjiN      | CDS        |
| O157                 | 5430083           | ns                |        | G2583_5141      | yjiN      | CDS        |
| O157                 | 5431702           | i                 |        | intergenic      |           |            |
| O157                 | 5433469           | ns                |        | G2583_5144      | yjiR      | CDS        |
| O157                 | 5434437           | ns                |        | G2583_5144      | yjiR      | CDS        |
| O157                 | 5435888           | nc                |        | G2583_5146      | -         | pseudogene |
| O157                 | 5435955           | del               |        | G2583_5146      | -         | pseudogene |
| CB9615               | 5274410           | nc                |        | G2583_5146      | -         | pseudogene |
| CB9615               | 5275058           | nc                |        | G2583_5146      | -         | pseudogene |
| CB9615               | 5276035           | i                 |        | intergenic      |           |            |
| CB9615               | 5276927           | ns                |        | G2583_5148      | hsdS      | CDS        |
| CB9615               | 5280327           | s                 |        | G2583_5150      | hsdR      | CDS        |
| O157                 | 5442652           | s                 |        | G2583_5150      | hsdR      | CDS        |
| O157                 | 5442889           | s                 |        | G2583_5150      | hsdR      | CDS        |
| CB9615               | 5281820           | ns                |        | G2583_5150      | hsdR      | CDS        |
| O157                 | 5444004           | ns                |        | G2583_5151-5152 | -         | CDS        |
| CB9615               | 5282850           | nc                |        | G2583_5152      | orf       | pseudogene |
| CB9615               | 5283013           | nc                |        | G2583_5152      | orf       | pseudogene |
| O55/O157             | 5287498           | i                 |        | intergenic      |           |            |
| EDL933               | 5481736           | ns                |        | G2583_5158      | yjiL      | CDS        |

| lineage <sup>a</sup> | site <sup>b</sup> | mutation          |        | gene       | Gene name | Type       |
|----------------------|-------------------|-------------------|--------|------------|-----------|------------|
|                      |                   | type <sup>c</sup> | recomb |            |           |            |
| EDL933               | 5483083           | ins               |        | intergenic |           |            |
| O157                 | 5456480           | s                 |        | G2583_5161 | mdoB      | CDS        |
| CB9615               | 5295608           | ns                |        | G2583_5161 | mdoB      | CDS        |
| O157                 | 5459145           | s                 |        | G2583_5163 | dnaC      | CDS        |
| O157                 | 5460660           | ns                |        | G2583_5166 | yjjP      | CDS        |
| CB9615               | 5299069           | s                 |        | G2583_5166 | yjjP      | CDS        |
| CB9615               | 5300139           | ns                |        | G2583_5167 | yjjQ      | CDS        |
| CB9615               | 5300156           | s                 |        | G2583_5167 | yjjQ      | CDS        |
| O157                 | 5464108           | i                 |        | intergenic |           |            |
| O157                 | 5465597           | ns                |        | G2583_5172 | rsmC      | CDS        |
| CB9615               | 5305771           | ns                |        | G2583_5175 | yjjG      | CDS        |
| O157                 | 5469081           | i                 |        | intergenic |           |            |
| O157                 | 5469953           | ns                |        | G2583_5236 | osmY      | CDS        |
| CB9615               | 5359368           | ns                |        | G2583_5237 | yjjU      | CDS        |
| CB9615               | 5359719           | ns                |        | G2583_5238 | yjjV      | CDS        |
| EDL933               | 5502279           | del               |        | G2583_5238 | yjjV      | CDS        |
| CB9615               | 5360458           | ns                |        | G2583_5239 | yjjW      | CDS        |
| Sakai                | 5473682           | ns                |        | G2583_5240 | yjjI      | CDS        |
| EDL933               | 5503677           | ns                |        | G2583_5240 | yjjI      | CDS        |
| EDL933               | 5503678           | s                 |        | G2583_5240 | yjjI      | CDS        |
| Sakai                | 5476180           | del               |        | G2583_5242 | deoA      | CDS        |
| CB9615               | 5367951           | nc                |        | G2583_5246 | lplA      | pseudogene |
| O157                 | 5480943           | nc                |        | G2583_5246 | lplA      | pseudogene |
| O157                 | 5483438           | s                 |        | G2583_5248 | radA      | CDS        |
| CB9615               | 5372126           | ns                |        | G2583_5249 | nadR      | CDS        |
| O157                 | 5485170           | ns                |        | G2583_5249 | nadR      | CDS        |
| O157                 | 5485573           | i                 |        | intergenic |           |            |
| CB9615               | 5375474           | s                 |        | G2583_5251 | slt       | CDS        |
| EDL933               | 5520694           | ns                |        | G2583_5254 | ytjC      | CDS        |
| EDL933               | 5520736           | s                 |        | G2583_5254 | ytjC      | CDS        |
| O157                 | 5493143           | s                 |        | G2583_5257 | creB      | CDS        |
| CB9615               | 5381292           | ns                |        | G2583_5257 | creB      | CDS        |
| CB9615               | 5381880           | ns                |        | G2583_5258 | creC      | CDS        |
| O157                 | 5498209           | ns                |        | G2583_5262 | yjtD      | CDS        |

<sup>a</sup> O157 allocated to the shared lineage to the common ancestor of EDL933 and Sakai; O55/O157 allocated to the SNPs at the divergence of CB9615 and O157:H7; Sakai/EDL933 allocated to the SNPs at the divergence of Sakai and EDL933.

<sup>b</sup> For indels the base indicated is the base before the insertion or deletion.

<sup>c</sup> ins, insertion; del, deletion; indel, insertion or deletion; i, intergenic; nc, in non-coding genes; ns, non-synonymous; s, synonymous. number after "ins" or "del" or "indel" is number of bases if greater than 1
