# Supplementary material for: Derivation of Escherichia coli O157:H7 from Its O55:H7 Precursor
Source: PubMed Central journal article supplement (PMC2806823; doi:10.1371/journal.pone.0008700), 2010-01-14
Supplement: pone.0008700.s007.pdf [file pone.0008700.s007.pdf]

**Table S5.** Summary of mutational and recombination changes in the 3 ExPEC genomes

| Lineage                 | Mutational SNPs <sup>a</sup> |          |       |         |         |       |             | Recombination events <sup>b</sup> |            |           |             |       |     |       |              |
|-------------------------|------------------------------|----------|-------|---------|---------|-------|-------------|-----------------------------------|------------|-----------|-------------|-------|-----|-------|--------------|
|                         | NC                           | NS       | S     | ins     | del     | indel | total       | No. events                        | NC         | NS        | S           | ins   | del | indel | total        |
| UTI89                   | 44                           | 149      | 86    | 11      | 10      | -     | 300         | 4                                 | 15/1       | 9/1       | 48/1        | 0     | 0   | -     | 72/3         |
| AS <sup>c</sup>         | 25                           | 74       | 76    | 6       | 14      | -     | 195         | 3                                 | 8/2        | 44/10     | 80/12       | 1     | 1/1 | -     | 134/25       |
| S88 <sup>d</sup>        | 40/1(4)                      | 123/2    | 71/2  | 8/2(1)  | 19/2(1) | -     | 261/9(6)    | 8                                 | 263/33(1)  | 468/56(1) | 1442/193(1) | 0/3   | 1   | -     | 2174/285(3)  |
| APEC 01 <sup>d</sup>    | 58/6                         | 149/4(4) | 95/1  | 40/5(1) | 21/2    | -     | 363/18(5)   | 13                                | 102/41(15) | 34/14(2)  | 81/30       | 33/10 | 5   | -     | 255/95(17)   |
| UTI89/AS <sup>c</sup>   | 3                            | 3        | 3     | -       | -       | 2     | 11          | 11                                | 39         | 298       | 739         | -     | -   | 2     | 1078         |
| APEC01/S88 <sup>e</sup> | 0                            | 0        | 0     | -       | -       | 2     | 2           | 1                                 | 323        | 0         | 0           | -     | -   | 1     | 324          |
| Total <sup>c</sup>      | 172/7(4)                     | 498/6(4) | 331/3 | 65/7(2) | 64/4(1) | 4     | 1134/27(11) | 40                                | 750/77(16) | 853/81(3) | 2390/236(1) | 34/13 | 7/1 | 3     | 4037/408(20) |

<sup>a</sup> Excludes SNPs in regions thought to have entered by recombination. NS, non-synonymous, S, synonymous, NC, in non-coding genes;

<sup>b</sup> SNPs in regions thought to have undergone recombination. NS, non-synonymous, S, synonymous, NC, non coding

<sup>c</sup> AS: allocated to the lineage to the common ancestor of APEC 01 and S88; UTI89/AS: allocated to the divergence between UTI89 and the common ancestor of APEC 01 and S88 (lineage not specified); APEC/S88: allocated to the divergence between APEC 01 and S88 lineages (lineage not specified)..

<sup>d</sup> Numbers with outgroup supported/conflict(no support)
