# Supplementary material for: Derivation of Escherichia coli O157:H7 from Its O55:H7 Precursor
Source: PubMed Central journal article supplement (PMC2806823; doi:10.1371/journal.pone.0008700), 2010-01-14
Supplement: pone.0008700.s008.pdf [file pone.0008700.s008.pdf]

| lineage <sup>a</sup> | site <sup>b</sup> | mutation          |        | gene        | Gene name | Type |
|----------------------|-------------------|-------------------|--------|-------------|-----------|------|
|                      |                   | type <sup>c</sup> | recomb |             |           |      |
| APEC                 | 5118              | nc                |        | intergenic  |           |      |
| UTI89                | 6015              | ns                |        | UTI89_C0007 | yaaA      | CDS  |
| AS                   | 6082              | ns                |        | UTI89_C0007 | yaaA      | CDS  |
| UTI89                | 7680              | ns                |        | UTI89_C0008 | yaaJ      | CDS  |
| APEC                 | 31161             | s                 |        | UTI89_C0035 | -         | CDS  |
| S88                  | 31393             | del               |        | intergenic  |           |      |
| UTI89                | 37126             | s                 |        | UTI89_C0040 | caiF      | CDS  |
| S88                  | 39519             | ns                |        | UTI89_C0043 | caiC      | CDS  |
| APEC                 | 39679             | s                 |        | UTI89_C0043 | caiC      | CDS  |
| APEC                 | 47432             | ns                |        | UTI89_C0049 | fixC      | CDS  |
| UTI89                | 56555             | s                 |        | UTI89_C0059 | pdxA      | CDS  |
| APEC                 | 58867             | s                 |        | UTI89_C0061 | imp       | CDS  |
| APEC                 | 62766             | ns                |        | UTI89_C0064 | hepA      | CDS  |
| APEC                 | 65993             | s                 |        | UTI89_C0065 | polB      | CDS  |
| UTI89                | 67549             | ns                |        | UTI89_C0065 | polB      | CDS  |
| APEC                 | 73312             | nc                |        | intergenic  |           |      |
| APEC                 | 73794             | del               |        | UTI89_C0071 | -         | CDS  |
| UTI89                | 74177             | del               |        | UTI89_C0071 | -         | CDS  |
| AS                   | 74988             | nc                |        | intergenic  |           |      |
| APEC                 | 76795             | s                 |        | UTI89_C0075 | thiP      | CDS  |
| UTI89                | 91573             | nc                |        | intergenic  |           |      |
| UTI89                | 91574             | nc                |        | intergenic  |           |      |
| AS                   | 92765             | s                 |        | UTI89_C0091 | mraW      | CDS  |
| S88                  | 97682             | s                 |        | UTI89_C0095 | murF      | CDS  |
| APEC                 | 104309            | ns                |        | UTI89_C0100 | murC      | CDS  |
| S88                  | 109023            | ns                |        | UTI89_C0105 | lpxC      | CDS  |
| UTI89                | 113567            | ns                |        | UTI89_C0108 | mutT      | CDS  |
| S88                  | 117905            | ns                |        | UTI89_C0113 | hofC      | CDS  |
| S88                  | 121009            | ns                |        | UTI89_C0117 | nadC      | CDS  |
| APEC                 | 123895            | nc                |        | intergenic  |           |      |
| S88                  | 125858            | ns                |        | UTI89_C0121 | usp       | CDS  |
| APEC                 | 126423            | ns                |        | UTI89_C0122 | -         | CDS  |
| APEC                 | 127885            | nc                |        | intergenic  |           |      |
| AS                   | 133966            | del               |        | UTI89_C0129 | lpdA      | CDS  |
| APEC                 | 140753            | del-4             |        | UTI89_C0132 | yacL      | CDS  |
| S88                  | 154676            | ns                |        | UTI89_C0147 | panC      | CDS  |
| APEC                 | 160783            | ns                |        | UTI89_C0153 | htrE      | CDS  |
| AS                   | 161005            | s                 |        | UTI89_C0153 | htrE      | CDS  |
| UTI89                | 164019            | ns                |        | UTI89_C0157 | pcnB      | CDS  |
| AS                   | 170142            | s                 |        | UTI89_C0162 | hrpB      | CDS  |
| S88                  | 181046            | s                 |        | UTI89_C0171 | yadQ      | CDS  |

| lineage <sup>a</sup> | site <sup>b</sup> | mutation          |        | gene        | Gene name | Type |
|----------------------|-------------------|-------------------|--------|-------------|-----------|------|
|                      |                   | type <sup>c</sup> | recomb |             |           |      |
| S88                  | 183902            | s                 |        | UTI89_C0174 | yadT      | CDS  |
| APEC                 | 184330            | s                 |        | UTI89_C0175 | mtn       | CDS  |
| APEC                 | 204744            | ns                |        | UTI89_C0192 | ecfK      | CDS  |
| UTI89                | 209338            | s                 |        | UTI89_C0198 | rnhB      | CDS  |
| APEC                 | 211459            | s                 |        | UTI89_C0199 | dnaE      | CDS  |
| S88                  | 216203            | ns                |        | UTI89_C0201 | ldcC      | CDS  |
| UTI89                | 216887            | ns                |        | UTI89_C0202 | yaeR      | CDS  |
| APEC                 | 219515            | ns                |        | UTI89_C0206 | yaeQ      | CDS  |
| S88                  | 221103            | ns                |        | UTI89_C0209 | yaeF      | CDS  |
| S88                  | 221634            | ns                | rec    | UTI89_C0209 | yaeF      | CDS  |
| S88                  | 221635            | s                 | rec    | UTI89_C0209 | yaeF      | CDS  |
| APEC                 | 228436            | nc                |        | intergenic  |           |      |
| APEC                 | 228446            | nc                |        | intergenic  |           |      |
| APEC                 | 228589            | nc                |        | intergenic  |           |      |
| APEC                 | 228636            | nc                |        | intergenic  |           |      |
| UTI89                | 228733            | nc                |        | intergenic  |           |      |
| UTI89                | 228787            | nc                |        | intergenic  |           |      |
| APEC                 | 229501            | nc                | rec    | intergenic  |           |      |
| APEC                 | 229505            | nc                | rec    | intergenic  |           |      |
| APEC                 | 229509            | nc                | rec    | intergenic  |           |      |
| APEC                 | 229518            | nc                | rec    | intergenic  |           |      |
| APEC                 | 229519            | nc                | rec    | intergenic  |           |      |
| APEC                 | 229520            | nc                | rec    | intergenic  |           |      |
| APEC                 | 229521            | nc                | rec    | intergenic  |           |      |
| APEC                 | 229522            | nc                | rec    | intergenic  |           |      |
| APEC                 | 229537            | nc                | rec    | intergenic  |           |      |
| UTI89                | 229776            | s                 |        | UTI89_C0218 | -         | CDS  |
| APEC                 | 230062            | nc                | rec    | intergenic  |           |      |
| APEC                 | 230556            | nc                | rec    | intergenic  |           |      |
| APEC                 | 230829            | ns                | rec    | UTI89_C0222 | -         | CDS  |
| APEC                 | 230830            | ns                | rec    | UTI89_C0222 | -         | CDS  |
| APEC                 | 231014            | nc                | rec    | intergenic  |           |      |
| APEC                 | 231016            | nc                | rec    | intergenic  |           |      |
| APEC                 | 231017            | nc                | rec    | intergenic  |           |      |
| APEC                 | 231021            | nc                | rec    | intergenic  |           |      |
| APEC                 | 231023            | nc                | rec    | intergenic  |           |      |
| APEC                 | 231025            | ins               | rec    | intergenic  |           |      |
| UTI89                | 231135            | nc                |        | intergenic  |           |      |
| APEC                 | 231319            | nc                | rec    | intergenic  |           |      |
| APEC                 | 231644            | nc                | rec    | intergenic  |           |      |
| APEC                 | 231647            | ins               | rec    | intergenic  |           |      |

| lineage <sup>a</sup> | site <sup>b</sup> | mutation          |        | gene        | Gene name | Type |
|----------------------|-------------------|-------------------|--------|-------------|-----------|------|
|                      |                   | type <sup>c</sup> | recomb |             |           |      |
| APEC                 | 231651            | nc                | rec    | intergenic  |           |      |
| APEC                 | 231692            | nc                | rec    | intergenic  |           |      |
| APEC                 | 231693            | nc                | rec    | intergenic  |           |      |
| APEC                 | 231702            | nc                | rec    | intergenic  |           |      |
| APEC                 | 231703            | nc                | rec    | intergenic  |           |      |
| APEC                 | 231979            | nc                | rec    | intergenic  |           |      |
| APEC                 | 232021            | nc                | rec    | intergenic  |           |      |
| UTI89                | 232332            | nc                |        | intergenic  |           |      |
| APEC                 | 232342            | del-2             | rec    | intergenic  |           |      |
| APEC                 | 232343            | nc                | rec    | intergenic  |           |      |
| APEC                 | 232345            | nc                | rec    | intergenic  |           |      |
| APEC                 | 232678            | nc                | rec    | intergenic  |           |      |
| APEC                 | 232713            | ins               | rec    | intergenic  |           |      |
| APEC                 | 232720            | ins               | rec    | intergenic  |           |      |
| APEC                 | 232731            | nc                | rec    | intergenic  |           |      |
| APEC                 | 232733            | nc                | rec    | intergenic  |           |      |
| APEC                 | 232741            | ins               | rec    | intergenic  |           |      |
| APEC                 | 232760            | nc                | rec    | intergenic  |           |      |
| APEC                 | 232774            | nc                | rec    | intergenic  |           |      |
| APEC                 | 232776            | nc                | rec    | intergenic  |           |      |
| APEC                 | 232777            | ins               | rec    | intergenic  |           |      |
| APEC                 | 232780            | nc                | rec    | intergenic  |           |      |
| APEC                 | 232804            | ins               |        | intergenic  |           |      |
| APEC                 | 232823            | ins               |        | intergenic  |           |      |
| APEC                 | 232873            | ins               |        | intergenic  |           |      |
| APEC                 | 232893            | ins               |        | intergenic  |           |      |
| S88                  | 233418            | ns                |        | UTI89_C0223 | -         | CDS  |
| UTI89                | 233433            | ins               |        | UTI89_C0223 | -         | CDS  |
| S88                  | 233439            | ins               |        | UTI89_C0223 | -         | CDS  |
| UTI89                | 239048            | ns                |        | UTI89_C0231 | gloB      | CDS  |
| AS                   | 239525            | s                 |        | UTI89_C0231 | gloB      | CDS  |
| APEC                 | 241861            | nc                | rec    | intergenic  |           |      |
| APEC                 | 241863            | nc                | rec    | intergenic  |           |      |
| APEC                 | 241864            | nc                | rec    | intergenic  |           |      |
| S88                  | 241945            | nc                |        | intergenic  |           |      |
| AS                   | 243169            | nc                |        | intergenic  |           |      |
| S88                  | 244031            | ns                |        | UTI89_C0238 | -         | CDS  |
| APEC                 | 245709            | ns                |        | UTI89_C0239 | -         | CDS  |
| S88                  | 249443            | ns                |        | UTI89_C0240 | -         | CDS  |
| S88                  | 250472            | ns                |        | UTI89_C0241 | -         | CDS  |
| S88                  | 253201            | ns                |        | UTI89_C0242 | -         | CDS  |

| lineage <sup>a</sup> | site <sup>b</sup> | mutation          |        | gene        | Gene name | Type |
|----------------------|-------------------|-------------------|--------|-------------|-----------|------|
|                      |                   | type <sup>c</sup> | recomb |             |           |      |
| S88                  | 260626            | ns                |        | UTI89_C0249 | -         | CDS  |
| S88                  | 263284            | nc                |        | intergenic  |           |      |
| AS                   | 263296            | nc                |        | intergenic  |           |      |
| APEC                 | 266641            | ns                |        | UTI89_C0254 | -         | CDS  |
| APEC                 | 268492            | ns                |        | UTI89_C0255 | -         | CDS  |
| APEC                 | 276772            | ins               |        | intergenic  |           |      |
| UTI89                | 278807            | ns                |        | UTI89_C0266 | yafL      | CDS  |
| AS                   | 280794            | ns                |        | UTI89_C0269 | fhiA      | CDS  |
| AS                   | 311464            | nc                |        | intergenic  |           |      |
| UTI89                | 310009            | ins               |        | intergenic  |           |      |
| S88                  | 300918            | nc                |        | intergenic  |           |      |
| APEC                 | 315157            | nc                |        | intergenic  |           |      |
| S88                  | 310135            | ns                |        | UTI89_C0309 | matB      | CDS  |
| UTI89                | 320925            | ns                |        | UTI89_C0309 | matB      | CDS  |
| UTI89                | 321246            | del               |        | UTI89_C0309 | matB      | CDS  |
| APEC                 | 323767            | nc                |        | intergenic  |           |      |
| APEC                 | 325910            | s                 |        | UTI89_C0315 | -         | CDS  |
| S88                  | 318098            | nc                |        | intergenic  |           |      |
| AS                   | 331177            | s                 |        | UTI89_C0319 | -         | CDS  |
| AS                   | 333894            | s                 |        | UTI89_C0321 | eaeH      | CDS  |
| AS                   | 338108            | nc                |        | intergenic  |           |      |
| UTI89                | 339541            | ns                |        | UTI89_C0327 | ykgC      | CDS  |
| APEC                 | 344072            | ins               |        | UTI89_C0330 | ykgF      | CDS  |
| UTI89                | 342623            | ns                |        | UTI89_C0330 | ykgF      | CDS  |
| UTI89                | 344595            | del               |        | intergenic  |           |      |
| APEC                 | 351257            | nc                |        | intergenic  |           |      |
| S88                  | 340182            | ins               |        | intergenic  |           |      |
| AS                   | 358679            | s                 |        | UTI89_C0343 | betT      | CDS  |
| AS                   | 365502            | s                 |        | UTI89_C0350 | yahF      | CDS  |
| AS                   | 366230            | s                 |        | UTI89_C0351 | yahG      | CDS  |
| APEC                 | 368325            | ns                |        | UTI89_C0352 | yahI      | CDS  |
| S88                  | 357010            | ns                |        | UTI89_C0353 | yahJ      | CDS  |
| UTI89                | 377150            | nc                |        | intergenic  |           |      |
| UTI89                | 378067            | nc                |        | intergenic  |           |      |
| S88                  | 375592            | s                 |        | UTI89_C0368 | codA      | CDS  |
| UTI89                | 386235            | s                 |        | UTI89_C0368 | codA      | CDS  |
| APEC                 | 390932            | ns                |        | UTI89_C0371 | lacZ      | CDS  |
| APEC                 | 393849            | ins               |        | intergenic  |           |      |
| APEC                 | 396951            | s                 |        | UTI89_C0376 | adhC      | CDS  |
| AS                   | 399882            | ns                |        | UTI89_C0381 | yaiP      | CDS  |
| UTI89                | 399075            | ns                |        | UTI89_C0381 | yaiP      | CDS  |

| lineage <sup>a</sup> | site <sup>b</sup> | mutation          |        | gene        | Gene name | Type |
|----------------------|-------------------|-------------------|--------|-------------|-----------|------|
|                      |                   | type <sup>c</sup> | recomb |             |           |      |
| APEC                 | 401910            | del-5             |        | intergenic  |           |      |
| APEC                 | 406963            | nc                |        | intergenic  |           |      |
| APEC                 | 409276            | s                 |        | UTI89_C0389 | -         | CDS  |
| S88                  | 404881            | del               |        | UTI89_C0400 | -         | CDS  |
| APEC                 | 417669            | ns                |        | UTI89_C0402 | phoA      | CDS  |
| S88                  | 409140            | s                 |        | UTI89_C0405 | proC      | CDS  |
| APEC                 | 424865            | nc                |        | intergenic  |           |      |
| APEC                 | 425775            | ins               |        | UTI89_C0414 | rdgC      | CDS  |
| S88                  | 415132            | ns                |        | UTI89_C0416 | araJ      | CDS  |
| APEC                 | 432372            | ns                |        | UTI89_C0418 | sbcD      | CDS  |
| UTI89                | 432469            | ns                |        | UTI89_C0421 | phoR      | CDS  |
| APEC                 | 434208            | ns                |        | UTI89_C0421 | phoR      | CDS  |
| UTI89                | 433304            | s                 |        | UTI89_C0421 | phoR      | CDS  |
| APEC                 | 439549            | s                 |        | UTI89_C0425 | malZ      | CDS  |
| APEC                 | 441697            | ns                |        | UTI89_C0427 | queA      | CDS  |
| UTI89                | 442626            | s                 |        | UTI89_C0430 | secD      | CDS  |
| APEC                 | 456245            | ns                |        | UTI89_C0444 | ispA      | CDS  |
| UTI89                | 456678            | s                 |        | UTI89_C0446 | yajK      | CDS  |
| S88                  | 454196            | ins-9             |        | UTI89_C0456 | cyoA      | CDS  |
| AS                   | 466419            | ins-9             |        | UTI89_C0456 | cyoA      | CDS  |
| AS                   | 474663            | s                 |        | UTI89_C0467 | lon       | CDS  |
| AS                   | 474886            | ns                |        | UTI89_C0467 | lon       | CDS  |
| AS                   | 483959            | nc                |        | intergenic  |           |      |
| APEC                 | 485133            | ns                |        | UTI89_C0476 | mdlA      | CDS  |
| APEC                 | 493298            | s                 |        | UTI89_C0484 | ylaB      | CDS  |
| AS                   | 495091            | nc                |        | intergenic  |           |      |
| AS                   | 498744            | s                 |        | UTI89_C0489 | acrB      | CDS  |
| AS                   | 513830            | ns                |        | UTI89_C0503 | hemH      | CDS  |
| APEC                 | 513964            | s                 |        | UTI89_C0503 | hemH      | CDS  |
| S88                  | 515249            | s                 |        | UTI89_C0515 | ybaR      | CDS  |
| S88                  | 517771            | s                 |        | UTI89_C0517 | ybaT      | CDS  |
| APEC                 | 532997            | ns                |        | UTI89_C0521 | -         | CDS  |
| S88                  | 521184            | nc                |        | intergenic  |           |      |
| S88                  | 523141            | ns                |        | UTI89_C0524 | ybbK      | CDS  |
| UTI89                | 535190            | s                 |        | UTI89_C0526 | ybbM      | CDS  |
| AS                   | 540553            | ns                |        | UTI89_C0531 | ybbP      | CDS  |
| AS                   | 540907            | ns                |        | UTI89_C0531 | ybbP      | CDS  |
| AS                   | 540920            | ns                |        | UTI89_C0531 | ybbP      | CDS  |
| UTI89                | 543064            | nc                |        | intergenic  |           |      |
| AS                   | 551199            | s                 |        | UTI89_C0539 | ybbW      | CDS  |
| S88                  | 558494            | nc                | rec    | intergenic  |           |      |

| lineage <sup>a</sup> | site <sup>b</sup> | mutation          |        | gene        | Gene name | Type |
|----------------------|-------------------|-------------------|--------|-------------|-----------|------|
|                      |                   | type <sup>c</sup> | recomb |             |           |      |
| S88                  | 558521            | ns                | rec    | UTI89_C0562 | intD      | CDS  |
| S88                  | 558524            | ns                | rec    | UTI89_C0562 | intD      | CDS  |
| S88                  | 558527            | ns                | rec    | UTI89_C0562 | intD      | CDS  |
| S88                  | 558537            | ns                | rec    | UTI89_C0562 | intD      | CDS  |
| APEC                 | 573656            | del               |        | intergenic  |           |      |
| APEC                 | 573803            | ins               |        | intergenic  |           |      |
| UTI89                | 576235            | ns                |        | UTI89_C0568 | nfrA      | CDS  |
| UTI89                | 576251            | ns                |        | UTI89_C0568 | nfrA      | CDS  |
| APEC                 | 586209            | ns                |        | UTI89_C0575 | cusA      | CDS  |
| UTI89                | 586944            | ns                |        | UTI89_C0575 | cusA      | CDS  |
| APEC                 | 588572            | ns                |        | UTI89_C0575 | cusA      | CDS  |
| UTI89                | 591673            | nc                |        | intergenic  |           |      |
| APEC                 | 596254            | ns                |        | UTI89_C0584 | fepA      | CDS  |
| AS                   | 597299            | ns                |        | UTI89_C0584 | fepA      | CDS  |
| UTI89                | 604433            | ns                |        | UTI89_C0591 | fepG      | CDS  |
| AS                   | 608911            | ns                |        | UTI89_C0593 | ybdA      | CDS  |
| APEC                 | 610399            | ns                |        | UTI89_C0595 | entC      | CDS  |
| S88                  | 657845            | del               |        | UTI89_C0603 | ybdL      | CDS  |
| AS                   | 619508            | ns                |        | UTI89_C0603 | ybdL      | CDS  |
| UTI89                | 620352            | ns                |        | UTI89_C0605 | ybdN      | CDS  |
| S88                  | 660617            | ns                |        | UTI89_C0606 | ybdO      | CDS  |
| APEC                 | 626734            | ins               |        | intergenic  |           |      |
| S88                  | 673585            | ns                |        | UTI89_C0622 | citC      | CDS  |
| APEC                 | 638418            | s                 |        | UTI89_C0624 | dpiA      | CDS  |
| APEC                 | 639863            | ns                |        | UTI89_C0625 | dcuC      | CDS  |
| UTI89                | 638644            | nc                |        | intergenic  |           |      |
| APEC                 | 648599            | ins               |        | UTI89_C0635 | rlpA      | CDS  |
| APEC                 | 649809            | s                 |        | UTI89_C0637 | mrdA      | CDS  |
| S88                  | 690039            | s                 |        | UTI89_C0637 | mrdA      | CDS  |
| UTI89                | 659858            | ns                |        | UTI89_C0650 | gltJ      | CDS  |
| AS                   | 663547            | nc                |        | intergenic  |           |      |
| S88                  | 702738            | ns                |        | UTI89_C0653 | -         | CDS  |
| AS                   | 665560            | ns                |        | UTI89_C0653 | -         | CDS  |
| APEC                 | 668292            | ns                |        | UTI89_C0657 | ybeY      | CDS  |
| AS                   | 672546            | s                 |        | UTI89_C0660 | yleB      | CDS  |
| S88                  | 720933            | del               |        | UTI89_C0676 | -         | CDS  |
| UTI89                | 682623            | ns                |        | UTI89_C0678 | -         | CDS  |
| APEC                 | 689398            | s                 |        | UTI89_C0681 | -         | CDS  |
| APEC                 | 701515            | ns                |        | UTI89_C0694 | potE      | CDS  |
| UTI89                | 703110            | ns                |        | UTI89_C0698 | kdpE      | CDS  |
| UTI89                | 712215            | ns                |        | UTI89_C0706 | phrB      | CDS  |

| lineage <sup>a</sup> | site <sup>b</sup> | mutation          |        | gene        | Gene name | Type |
|----------------------|-------------------|-------------------|--------|-------------|-----------|------|
|                      |                   | type <sup>c</sup> | recomb |             |           |      |
| UTI89                | 714992            | nc                |        | intergenic  |           |      |
| S88                  | 766076            | nc                |        | intergenic  |           |      |
| APEC                 | 732257            | s                 |        | UTI89_C0723 | sucC      | CDS  |
| APEC                 | 732869            | s                 |        | UTI89_C0723 | sucC      | CDS  |
| APEC                 | 736412            | nc                |        | intergenic  |           |      |
| APEC                 | 741494            | s                 |        | UTI89_C0734 | tolR      | CDS  |
| S88                  | 785125            | nc                |        | intergenic  |           |      |
| APEC                 | 750629            | s                 |        | UTI89_C0751 | aroG      | CDS  |
| APEC                 | 751717            | s                 |        | UTI89_C0752 | gpmA      | CDS  |
| APEC                 | 753934            | s                 |        | UTI89_C0754 | galK      | CDS  |
| S88                  | 806049            | ns                |        | UTI89_C0768 | ybhI      | CDS  |
| APEC                 | 774004            | ins               |        | UTI89_C0772 | bioA      | CDS  |
| AS                   | 774437            | s                 |        | UTI89_C0773 | bioB      | CDS  |
| UTI89                | 779702            | nc                |        | intergenic  |           |      |
| AS                   | 781398            | nc                |        | intergenic  |           |      |
| UTI89                | 786791            | s                 |        | UTI89_C0791 | ybhP      | CDS  |
| APEC                 | 788919            | ns                |        | UTI89_C0791 | ybhP      | CDS  |
| APEC                 | 789267            | s                 |        | UTI89_C0792 | ybhQ      | CDS  |
| UTI89                | 792683            | ns                |        | UTI89_C0796 | ybhG      | CDS  |
| APEC                 | 796678            | ns                |        | UTI89_C0798 | rhIE      | CDS  |
| S88                  | 835220            | ns                |        | UTI89_C0799 | -         | CDS  |
| UTI89                | 799830            | ns                |        | UTI89_C0804 | ybiC      | CDS  |
| APEC                 | 804662            | ns                |        | UTI89_C0808 | ybiL      | CDS  |
| S88                  | 844082            | ns                |        | UTI89_C0808 | ybiL      | CDS  |
| UTI89                | 806581            | ns                |        | UTI89_C0811 | ybiO      | CDS  |
| APEC                 | 809162            | ns                |        | UTI89_C0811 | ybiO      | CDS  |
| UTI89                | 810780            | ns                |        | UTI89_C0815 | -         | CDS  |
| AS                   | 812413            | ns                |        | UTI89_C0815 | -         | CDS  |
| APEC                 | 820701            | s                 |        | UTI89_C0824 | ybiT      | CDS  |
| APEC                 | 831437            | ns                |        | UTI89_C0832 | -         | CDS  |
| APEC                 | 831942            | ns                |        | UTI89_C0832 | -         | CDS  |
| APEC                 | 832915            | ins               |        | UTI89_C0833 | -         | CDS  |
| APEC                 | 835714            | nc                |        | intergenic  |           |      |
| UTI89                | 835947            | s                 |        | UTI89_C0836 | yliE      | CDS  |
| UTI89                | 843239            | ns                |        | UTI89_C0843 | deoR      | CDS  |
| AS                   | 851213            | s                 |        | UTI89_C0850 | ybjL      | CDS  |
| S88                  | 896241            | ns                |        | UTI89_C0858 | potG      | CDS  |
| UTI89                | 860894            | ns                |        | UTI89_C0863 | artJ      | CDS  |
| S88                  | 901752            | del               |        | intergenic  |           |      |
| AS                   | 866914            | del               |        | UTI89_C0868 | ybjP      | CDS  |
| S88                  | 907849            | ns                |        | UTI89_C0872 | ybjT      | CDS  |
| UTI89                | 874804            | nc                |        | intergenic  |           |      |

| lineage <sup>a</sup> | site <sup>b</sup> | mutation          |        | gene        | Gene name | Type |
|----------------------|-------------------|-------------------|--------|-------------|-----------|------|
|                      |                   | type <sup>c</sup> | recomb |             |           |      |
| APEC                 | 879148            | ns                |        | UTI89_C0880 | ybjD      | CDS  |
| UTI89                | 887400            | ns                |        | UTI89_C0890 | -         | CDS  |
| UTI89                | 898073            | ns                |        | UTI89_C0901 | cydC      | CDS  |
| UTI89                | 899916            | ns                |        | UTI89_C0902 | cydD      | CDS  |
| APEC                 | 904128            | nc                |        | intergenic  |           |      |
| UTI89                | 905103            | ns                |        | UTI89_C0905 | ftsK      | CDS  |
| AS                   | 963391            | s                 |        | UTI89_C0979 | aroA      | CDS  |
| UTI89                | 965722            | s                 |        | UTI89_C0981 | cmk       | CDS  |
| APEC                 | 968986            | s                 |        | UTI89_C0984 | ycaI      | CDS  |
| APEC                 | 969657            | del-5             |        | UTI89_C0984 | ycaI      | CDS  |
| APEC                 | 969814            | del               |        | UTI89_C0984 | ycaI      | CDS  |
| APEC                 | 974947            | ns                |        | UTI89_C0989 | kdsB      | CDS  |
| S88                  | 980014            | ns                |        | UTI89_C0991 | ycbC      | CDS  |
| UTI89                | 978577            | ns                |        | UTI89_C0993 | smtA      | CDS  |
| S88                  | 982782            | ns                |        | UTI89_C0995 | mukE      | CDS  |
| S88                  | 1000141           | nc                |        | intergenic  |           |      |
| UTI89                | 1001866           | s                 |        | UTI89_C1009 | ycbP      | CDS  |
| APEC                 | 1004073           | nc                |        | intergenic  |           |      |
| AS                   | 1007958           | s                 |        | UTI89_C1014 | uup       | CDS  |
| S88                  | 1011855           | nc                |        | intergenic  |           |      |
| S88                  | 1020061           | nc                |        | intergenic  |           |      |
| S88                  | 1025569           | ns                |        | UTI89_C1028 | helD      | CDS  |
| UTI89                | 1023423           | s                 |        | UTI89_C1028 | helD      | CDS  |
| UTI89                | 1027187           | ns                |        | UTI89_C1034 | yccW      | CDS  |
| S88                  | 1029784           | del               |        | UTI89_C1034 | yccW      | CDS  |
| APEC                 | 1035939           | ns                |        | UTI89_C1047 | appB      | CDS  |
| AS                   | 1045232           | del-10            |        | intergenic  |           |      |
| AS                   | 1049569           | s                 |        | UTI89_C1062 | torD      | CDS  |
| APEC                 | 1069313           | s                 |        | UTI89_C1082 | ycdB      | CDS  |
| AS                   | 1070160           | ns                |        | UTI89_C1082 | ycdB      | CDS  |
| UTI89                | 1071431           | nc                |        | intergenic  |           |      |
| S88                  | 1079858           | ns                |        | UTI89_C1087 | ycdS      | CDS  |
| AS                   | 1076603           | ns                |        | UTI89_C1087 | ycdS      | CDS  |
| UTI89                | 1158594           | ns                |        | UTI89_C1175 | yceK      | CDS  |
| UTI89                | 1171909           | ns                |        | UTI89_C1193 | mviM      | CDS  |
| APEC                 | 1113615           | ns                |        | UTI89_C1198 | flgB      | CDS  |
| S88                  | 1120418           | ns                |        | UTI89_C1202 | flgF      | CDS  |
| APEC                 | 1119396           | ns                |        | UTI89_C1205 | flgI      | CDS  |
| UTI89                | 1189065           | s                 |        | UTI89_C1209 | rne       | CDS  |
| UTI89                | 1197653           | ns                |        | UTI89_C1221 | fabF      | CDS  |
| S88                  | 1147584           | ns                |        | UTI89_C1230 | -         | CDS  |



| lineage <sup>a</sup> | site <sup>b</sup> | mutation          |        | gene        | Gene name | Type |
|----------------------|-------------------|-------------------|--------|-------------|-----------|------|
|                      |                   | type <sup>c</sup> | recomb |             |           |      |
| APEC                 | 1146584           | ns                |        | UTI89_C1235 | ycfO      | CDS  |
| UTI89                | 1213900           | nc                |        | intergenic  |           |      |
| UTI89                | 1214628           | s                 |        | UTI89_C1241 | ycfS      | CDS  |
| APEC                 | 1152100           | s                 |        | UTI89_C1241 | ycfS      | CDS  |
| APEC                 | 1154549           | ns                |        | UTI89_C1242 | mfd       | CDS  |
| APEC                 | 1170175           | ns                |        | UTI89_C1257 | -         | CDS  |
| AS                   | 1172456           | s                 |        | UTI89_C1259 | phoP      | CDS  |
| S88                  | 1177079           | s                 |        | UTI89_C1260 | purB      | CDS  |
| AS                   | 1179437           | s                 |        | UTI89_C1267 | -         | CDS  |
| UTI89                | 1247499           | nc                |        | intergenic  |           |      |
| APEC                 | 1188415           | del               |        | intergenic  |           |      |
| S88                  | 1193074           | del-13            |        | UTI89_C1290 | -         | CDS  |
| UTI89                | 1256059           | s                 |        | UTI89_C1300 | ybcQ1     | CDS  |
| AS                   | 1195284           | nc                |        | intergenic  |           |      |
| APEC                 | 1198616           | del               |        | UTI89_C1310 | -         | CDS  |
| UTI89                | 1261370           | ins               |        | UTI89_C1310 | -         | CDS  |
| AS                   | 1198962           | ns                |        | UTI89_C1311 | nohA1     | CDS  |
| UTI89                | 1265584           | s                 |        | UTI89_C1314 | -         | CDS  |
| UTI89                | 1265659           | s                 |        | UTI89_C1314 | -         | CDS  |
| S88                  | 1208449           | s                 | rec    | UTI89_C1316 | -         | CDS  |
| S88                  | 1209108           | ns                | rec    | UTI89_C1317 | -         | CDS  |
| APEC                 | 1205714           | ns                |        | UTI89_C1317 | -         | CDS  |
| S88                  | 1209796           | s                 | rec    | UTI89_C1318 | -         | CDS  |
| S88                  | 1210104           | ns                | rec    | UTI89_C1319 | -         | CDS  |
| S88                  | 1210334           | s                 | rec    | UTI89_C1319 | -         | CDS  |
| S88                  | 1210361           | ns                | rec    | UTI89_C1320 | -         | CDS  |
| S88                  | 1210363           | ns                | rec    | UTI89_C1320 | -         | CDS  |
| S88                  | 1210411           | s                 | rec    | UTI89_C1320 | -         | CDS  |
| S88                  | 1210417           | s                 | rec    | UTI89_C1320 | -         | CDS  |
| S88                  | 1210424           | ns                | rec    | UTI89_C1320 | -         | CDS  |
| S88                  | 1210471           | s                 | rec    | UTI89_C1320 | -         | CDS  |
| S88                  | 1210479           | ns                | rec    | UTI89_C1320 | -         | CDS  |
| S88                  | 1210526           | ns                | rec    | UTI89_C1320 | -         | CDS  |
| S88                  | 1210573           | s                 | rec    | UTI89_C1320 | -         | CDS  |
| S88                  | 1210680           | ns                | rec    | UTI89_C1320 | -         | CDS  |
| S88                  | 1210747           | s                 | rec    | UTI89_C1320 | -         | CDS  |
| S88                  | 1210816           | s                 | rec    | UTI89_C1320 | -         | CDS  |
| S88                  | 1210867           | s                 | rec    | UTI89_C1320 | -         | CDS  |
| S88                  | 1210947           | s                 | rec    | UTI89_C1321 | -         | CDS  |
| S88                  | 1211010           | s                 | rec    | UTI89_C1321 | -         | CDS  |
| S88                  | 1211059           | ns                | rec    | UTI89_C1321 | -         | CDS  |

| lineage <sup>a</sup> | site <sup>b</sup> | mutation          |        | gene        | Gene name | Type |
|----------------------|-------------------|-------------------|--------|-------------|-----------|------|
|                      |                   | type <sup>c</sup> | recomb |             |           |      |
| S88                  | 1211256           | s                 | rec    | UTI89_C1321 | -         | CDS  |
| S88                  | 1211328           | ns                | rec    | UTI89_C1322 | -         | CDS  |
| S88                  | 1211335           | s                 | rec    | UTI89_C1322 | -         | CDS  |
| S88                  | 1211336           | ns                | rec    | UTI89_C1322 | -         | CDS  |
| S88                  | 1211337           | ns                | rec    | UTI89_C1322 | -         | CDS  |
| S88                  | 1211348           | ns                | rec    | UTI89_C1322 | -         | CDS  |
| S88                  | 1207736           | ns                | rec    | UTI89_C1322 | -         | CDS  |
| S88                  | 1211350           | ns                | rec    | UTI89_C1322 | -         | CDS  |
| S88                  | 1211351           | ns                | rec    | UTI89_C1322 | -         | CDS  |
| S88                  | 1211352           | ns                | rec    | UTI89_C1322 | -         | CDS  |
| S88                  | 1211353           | ns                | rec    | UTI89_C1322 | -         | CDS  |
| S88                  | 1211365           | s                 | rec    | UTI89_C1322 | -         | CDS  |
| S88                  | 1211392           | ns                | rec    | UTI89_C1322 | -         | CDS  |
| S88                  | 1211397           | ns                | rec    | UTI89_C1322 | -         | CDS  |
| S88                  | 1211401           | s                 | rec    | UTI89_C1322 | -         | CDS  |
| S88                  | 1211413           | s                 | rec    | UTI89_C1322 | -         | CDS  |
| S88                  | 1211429           | ns                | rec    | UTI89_C1322 | -         | CDS  |
| S88                  | 1211430           | ns                | rec    | UTI89_C1322 | -         | CDS  |
| S88                  | 1211453           | ns                | rec    | UTI89_C1322 | -         | CDS  |
| S88                  | 1211503           | s                 | rec    | UTI89_C1322 | -         | CDS  |
| S88                  | 1211533           | s                 | rec    | UTI89_C1322 | -         | CDS  |
| S88                  | 1211557           | s                 | rec    | UTI89_C1322 | -         | CDS  |
| S88                  | 1211716           | s                 | rec    | UTI89_C1322 | -         | CDS  |
| S88                  | 1211746           | s                 | rec    | UTI89_C1322 | -         | CDS  |
| S88                  | 1211770           | s                 | rec    | UTI89_C1322 | -         | CDS  |
| S88                  | 1211773           | s                 | rec    | UTI89_C1322 | -         | CDS  |
| S88                  | 1211779           | s                 | rec    | UTI89_C1322 | -         | CDS  |
| S88                  | 1211785           | s                 | rec    | UTI89_C1322 | -         | CDS  |
| S88                  | 1211809           | s                 | rec    | UTI89_C1322 | -         | CDS  |
| S88                  | 1211818           | s                 | rec    | UTI89_C1322 | -         | CDS  |
| S88                  | 1211824           | s                 | rec    | UTI89_C1322 | -         | CDS  |
| S88                  | 1211827           | s                 | rec    | UTI89_C1322 | -         | CDS  |
| S88                  | 1211833           | s                 | rec    | UTI89_C1322 | -         | CDS  |
| S88                  | 1211839           | s                 | rec    | UTI89_C1322 | -         | CDS  |
| S88                  | 1211840           | ns                | rec    | UTI89_C1322 | -         | CDS  |
| S88                  | 1211842           | ns                | rec    | UTI89_C1322 | -         | CDS  |
| S88                  | 1211845           | s                 | rec    | UTI89_C1322 | -         | CDS  |
| S88                  | 1211848           | s                 | rec    | UTI89_C1322 | -         | CDS  |
| S88                  | 1211881           | s                 | rec    | UTI89_C1322 | -         | CDS  |
| S88                  | 1211893           | s                 | rec    | UTI89_C1322 | -         | CDS  |
| S88                  | 1211896           | s                 | rec    | UTI89_C1322 | -         | CDS  |

| lineage <sup>a</sup> | site <sup>b</sup> | mutation          |        | gene        | Gene name | Type |
|----------------------|-------------------|-------------------|--------|-------------|-----------|------|
|                      |                   | type <sup>c</sup> | recomb |             |           |      |
| S88                  | 1211898           | ns                | rec    | UTI89_C1322 | -         | CDS  |
| S88                  | 1211902           | s                 | rec    | UTI89_C1322 | -         | CDS  |
| S88                  | 1211926           | s                 | rec    | UTI89_C1322 | -         | CDS  |
| S88                  | 1212031           | s                 | rec    | UTI89_C1322 | -         | CDS  |
| S88                  | 1212032           | ns                | rec    | UTI89_C1322 | -         | CDS  |
| S88                  | 1212055           | s                 | rec    | UTI89_C1322 | -         | CDS  |
| S88                  | 1212063           | ns                | rec    | UTI89_C1322 | -         | CDS  |
| S88                  | 1212100           | s                 | rec    | UTI89_C1323 | -         | CDS  |
| S88                  | 1212186           | ns                | rec    | UTI89_C1323 | -         | CDS  |
| S88                  | 1212221           | ns                | rec    | UTI89_C1323 | -         | CDS  |
| S88                  | 1212224           | ns                | rec    | UTI89_C1323 | -         | CDS  |
| S88                  | 1212306           | ns                | rec    | UTI89_C1323 | -         | CDS  |
| S88                  | 1212364           | s                 | rec    | UTI89_C1323 | -         | CDS  |
| S88                  | 1212365           | ns                | rec    | UTI89_C1323 | -         | CDS  |
| S88                  | 1212367           | ns                | rec    | UTI89_C1323 | -         | CDS  |
| S88                  | 1212420           | ns                | rec    | UTI89_C1323 | -         | CDS  |
| S88                  | 1212445           | ns                | rec    | UTI89_C1323 | -         | CDS  |
| S88                  | 1212458           | ns                | rec    | UTI89_C1323 | -         | CDS  |
| S88                  | 1212464           | ns                | rec    | UTI89_C1323 | -         | CDS  |
| S88                  | 1212531           | s                 | rec    | UTI89_C1324 | -         | CDS  |
| S88                  | 1212582           | s                 | rec    | UTI89_C1324 | -         | CDS  |
| APEC                 | 1209027           | ns                |        | UTI89_C1324 | -         | CDS  |
| S88                  | 1212669           | s                 | rec    | UTI89_C1324 | -         | CDS  |
| S88                  | 1212721           | s                 | rec    | UTI89_C1324 | -         | CDS  |
| S88                  | 1212740           | ns                | rec    | UTI89_C1324 | -         | CDS  |
| S88                  | 1212790           | ns                | rec    | UTI89_C1324 | -         | CDS  |
| S88                  | 1212809           | ns                | rec    | UTI89_C1324 | -         | CDS  |
| S88                  | 1213180           | s                 | rec    | UTI89_C1325 | -         | CDS  |
| S88                  | 1213207           | s                 | rec    | UTI89_C1325 | -         | CDS  |
| S88                  | 1213210           | s                 | rec    | UTI89_C1325 | -         | CDS  |
| S88                  | 1213216           | s                 | rec    | UTI89_C1325 | -         | CDS  |
| S88                  | 1213250           | s                 | rec    | UTI89_C1325 | -         | CDS  |
| S88                  | 1213285           | s                 | rec    | UTI89_C1325 | -         | CDS  |
| S88                  | 1213342           | s                 | rec    | UTI89_C1325 | -         | CDS  |
| S88                  | 1213394           | ns                | rec    | UTI89_C1325 | -         | CDS  |
| S88                  | 1213399           | s                 | rec    | UTI89_C1325 | -         | CDS  |
| UTI89                | 1274273           | s                 |        | UTI89_C1325 | -         | CDS  |
| S88                  | 1216214           | ns                |        | UTI89_C1327 | -         | CDS  |
| UTI89/AS             | 1214747           | s                 | rec    | UTI89_C1331 | -         | CDS  |
| UTI89/AS             | 1277521           | s                 | rec    | UTI89_C1331 | -         | CDS  |
| UTI89/AS             | 1214844           | s                 | rec    | UTI89_C1331 | -         | CDS  |

| lineage <sup>a</sup> | site <sup>b</sup> | mutation          |        | gene        | Gene name | Type |
|----------------------|-------------------|-------------------|--------|-------------|-----------|------|
|                      |                   | type <sup>c</sup> | recomb |             |           |      |
| UTI89/AS             | 1214927           | s                 | rec    | UTI89_C1331 | -         | CDS  |
| UTI89/AS             | 1277647           | s                 | rec    | UTI89_C1331 | -         | CDS  |
| UTI89/AS             | 1277839           | s                 | rec    | UTI89_C1331 | -         | CDS  |
| UTI89/AS             | 1277845           | s                 | rec    | UTI89_C1331 | -         | CDS  |
| UTI89/AS             | 1215149           | s                 | rec    | UTI89_C1331 | -         | CDS  |
| UTI89/AS             | 1215158           | s                 | rec    | UTI89_C1331 | -         | CDS  |
| UTI89/AS             | 1215200           | s                 | rec    | UTI89_C1331 | -         | CDS  |
| UTI89/AS             | 1215209           | s                 | rec    | UTI89_C1331 | -         | CDS  |
| UTI89/AS             | 1277923           | s                 | rec    | UTI89_C1331 | -         | CDS  |
| UTI89/AS             | 1277953           | s                 | rec    | UTI89_C1331 | -         | CDS  |
| UTI89/AS             | 1277955           | ns                | rec    | UTI89_C1331 | -         | CDS  |
| UTI89/AS             | 1277956           | ns                | rec    | UTI89_C1331 | -         | CDS  |
| UTI89/AS             | 1277986           | s                 | rec    | UTI89_C1331 | -         | CDS  |
| UTI89/AS             | 1215293           | s                 | rec    | UTI89_C1331 | -         | CDS  |
| UTI89/AS             | 1278046           | s                 | rec    | UTI89_C1331 | -         | CDS  |
| UTI89/AS             | 1278118           | s                 | rec    | UTI89_C1331 | -         | CDS  |
| UTI89/AS             | 1278166           | s                 | rec    | UTI89_C1331 | -         | CDS  |
| UTI89/AS             | 1278337           | s                 | rec    | UTI89_C1331 | -         | CDS  |
| UTI89/AS             | 1278346           | s                 | rec    | UTI89_C1331 | -         | CDS  |
| UTI89/AS             | 1278361           | s                 | rec    | UTI89_C1331 | -         | CDS  |
| UTI89/AS             | 1278376           | s                 | rec    | UTI89_C1331 | -         | CDS  |
| APEC                 | 1215695           | s                 |        | UTI89_C1331 | -         | CDS  |
| UTI89/AS             | 1278418           | s                 | rec    | UTI89_C1331 | -         | CDS  |
| UTI89/AS             | 1278433           | s                 | rec    | UTI89_C1331 | -         | CDS  |
| UTI89/AS             | 1278436           | s                 | rec    | UTI89_C1331 | -         | CDS  |
| UTI89/AS             | 1278444           | ns                | rec    | UTI89_C1331 | -         | CDS  |
| UTI89/AS             | 1278448           | s                 | rec    | UTI89_C1331 | -         | CDS  |
| UTI89/AS             | 1278451           | s                 | rec    | UTI89_C1331 | -         | CDS  |
| UTI89/AS             | 1215766           | ns                | rec    | UTI89_C1331 | -         | CDS  |
| UTI89/AS             | 1278478           | s                 | rec    | UTI89_C1331 | -         | CDS  |
| UTI89/AS             | 1278484           | s                 | rec    | UTI89_C1331 | -         | CDS  |
| UTI89/AS             | 1278523           | s                 | rec    | UTI89_C1331 | -         | CDS  |
| UTI89/AS             | 1215838           | ns                | rec    | UTI89_C1331 | -         | CDS  |
| UTI89/AS             | 1278550           | s                 | rec    | UTI89_C1331 | -         | CDS  |
| UTI89/AS             | 1278556           | s                 | rec    | UTI89_C1331 | -         | CDS  |
| UTI89/AS             | 1278604           | s                 | rec    | UTI89_C1331 | -         | CDS  |
| UTI89/AS             | 1215954           | s                 | rec    | UTI89_C1331 | -         | CDS  |
| UTI89/AS             | 1215959           | s                 | rec    | UTI89_C1331 | -         | CDS  |
| UTI89/AS             | 1215963           | s                 | rec    | UTI89_C1331 | -         | CDS  |
| UTI89/AS             | 1278691           | s                 | rec    | UTI89_C1331 | -         | CDS  |
| UTI89/AS             | 1278733           | s                 | rec    | UTI89_C1331 | -         | CDS  |

| lineage <sup>a</sup> | site <sup>b</sup> | mutation          |        | gene        | Gene name | Type |
|----------------------|-------------------|-------------------|--------|-------------|-----------|------|
|                      |                   | type <sup>c</sup> | recomb |             |           |      |
| UTI89/AS             | 1278754           | s                 | rec    | UTI89_C1331 | -         | CDS  |
| UTI89/AS             | 1216055           | s                 | rec    | UTI89_C1331 | -         | CDS  |
| UTI89/AS             | 1278793           | s                 | rec    | UTI89_C1331 | -         | CDS  |
| UTI89/AS             | 1216127           | s                 | rec    | UTI89_C1331 | -         | CDS  |
| UTI89/AS             | 1278847           | s                 | rec    | UTI89_C1331 | -         | CDS  |
| APEC                 | 1217015           | ins               |        | UTI89_C1331 | -         | CDS  |
| UTI89                | 1285383           | ns                |        | UTI89_C1338 | sitB      | CDS  |
| AS                   | 1222716           | s                 |        | UTI89_C1338 | sitB      | CDS  |
| AS                   | 1222983           | ns                |        | UTI89_C1338 | sitB      | CDS  |
| AS                   | 1222985           | ns                |        | UTI89_C1338 | sitB      | CDS  |
| APEC                 | 1224448           | ns                |        | UTI89_C1340 | -         | CDS  |
| UTI89                | 1290845           | ns                |        | UTI89_C1346 | ycgF      | CDS  |
| S88                  | 1241187           | ns                |        | UTI89_C1361 | minC      | CDS  |
| APEC                 | 1242532           | ns                |        | UTI89_C1370 | umuC      | CDS  |
| AS                   | 1248237           | s                 |        | UTI89_C1374 | ycgB      | CDS  |
| UTI89                | 1317484           | s                 |        | UTI89_C1382 | yngE      | CDS  |
| UTI89                | 1318229           | s                 |        | UTI89_C1383 | prxA      | CDS  |
| APEC                 | 1257278           | ns                |        | UTI89_C1383 | prxA      | CDS  |
| APEC                 | 1264192           | ns                |        | UTI89_C1389 | treA      | CDS  |
| S88                  | 1270139           | ns                |        | UTI89_C1392 | ycgS      | CDS  |
| S88                  | 1271859           | ns                |        | UTI89_C1394 | -         | CDS  |
| APEC                 | 1273071           | s                 |        | UTI89_C1400 | ychM      | CDS  |
| UTI89                | 1335889           | ns                |        | UTI89_C1400 | ychM      | CDS  |
| APEC                 | 1274989           | s                 |        | UTI89_C1401 | prsA      | CDS  |
| APEC                 | 1278030           | ns                |        | UTI89_C1404 | hemA      | CDS  |
| S88                  | 1285199           | s                 |        | UTI89_C1408 | ychA      | CDS  |
| UTI89                | 1344099           | s                 |        | UTI89_C1409 | kdsA      | CDS  |
| APEC                 | 1283905           | ns                |        | UTI89_C1411 | chaA      | CDS  |
| S88                  | 1288133           | s                 |        | UTI89_C1411 | chaA      | CDS  |
| S88                  | 1288212           | nc                |        | intergenic  |           |      |
| AS                   | 1286017           | ns                |        | UTI89_C1415 | ychN      | CDS  |
| APEC                 | 1286748           | ns                |        | UTI89_C1416 | ychP      | CDS  |
| UTI89                | 1351411           | s                 |        | UTI89_C1418 | narX      | CDS  |
| S88                  | 1293938           | s                 |        | UTI89_C1419 | -         | CDS  |
| S88                  | 1298524           | ns                |        | UTI89_C1421 | narG      | CDS  |
| UTI89                | 1356862           | s                 |        | UTI89_C1421 | narG      | CDS  |
| APEC                 | 1300590           | nc                |        | intergenic  |           |      |
| UTI89                | 1383331           | ns                |        | UTI89_C1449 | kch       | CDS  |
| AS                   | 1322095           | s                 |        | UTI89_C1449 | kch       | CDS  |
| APEC                 | 1334641           | ns                |        | UTI89_C1469 | -         | CDS  |
| APEC                 | 1334645           | del-12            |        | UTI89_C1469 | -         | CDS  |

| lineage <sup>a</sup> | site <sup>b</sup> | mutation          |        | gene        | Gene name | Type |
|----------------------|-------------------|-------------------|--------|-------------|-----------|------|
|                      |                   | type <sup>c</sup> | recomb |             |           |      |
| AS                   | 1335515           | ns                |        | UTI89_C1470 | -         | CDS  |
| UTI89/AS             | 1397449           | ns                |        | UTI89_C1471 | -         | CDS  |
| AS                   | 1345332           | ins               |        | UTI89_C1490 | -         | CDS  |
| APEC                 | 1347766           | ins               |        | UTI89_C1495 | -         | CDS  |
| APEC                 | 1349486           | s                 |        | UTI89_C1497 | -         | CDS  |
| AS                   | 1349543           | s                 |        | UTI89_C1497 | -         | CDS  |
| AS                   | 1349553           | ns                |        | UTI89_C1497 | -         | CDS  |
| S88                  | 1353928           | del               |        | UTI89_C1497 | -         | CDS  |
| UTI89/AS             | 1350611           | s                 | rec    | UTI89_C1499 | -         | CDS  |
| UTI89/AS             | 1350612           | ns                | rec    | UTI89_C1499 | -         | CDS  |
| UTI89/AS             | 1412751           | s                 | rec    | UTI89_C1499 | -         | CDS  |
| UTI89/AS             | 1412787           | s                 | rec    | UTI89_C1499 | -         | CDS  |
| UTI89/AS             | 1412799           | s                 | rec    | UTI89_C1499 | -         | CDS  |
| UTI89/AS             | 1350752           | s                 | rec    | UTI89_C1499 | -         | CDS  |
| UTI89/AS             | 1350797           | s                 | rec    | UTI89_C1499 | -         | CDS  |
| UTI89/AS             | 1412892           | s                 | rec    | UTI89_C1499 | -         | CDS  |
| UTI89/AS             | 1350836           | s                 | rec    | UTI89_C1499 | -         | CDS  |
| UTI89/AS             | 1350845           | s                 | rec    | UTI89_C1499 | -         | CDS  |
| UTI89/AS             | 1350860           | s                 | rec    | UTI89_C1499 | -         | CDS  |
| UTI89/AS             | 1412964           | s                 | rec    | UTI89_C1499 | -         | CDS  |
| UTI89/AS             | 1412976           | s                 | rec    | UTI89_C1499 | -         | CDS  |
| UTI89/AS             | 1413054           | s                 | rec    | UTI89_C1499 | -         | CDS  |
| UTI89/AS             | 1413056           | ns                | rec    | UTI89_C1499 | -         | CDS  |
| UTI89/AS             | 1350971           | ns                | rec    | UTI89_C1499 | -         | CDS  |
| UTI89/AS             | 1413063           | s                 | rec    | UTI89_C1499 | -         | CDS  |
| UTI89/AS             | 1413064           | s                 | rec    | UTI89_C1499 | -         | CDS  |
| UTI89/AS             | 1413066           | s                 | rec    | UTI89_C1499 | -         | CDS  |
| UTI89/AS             | 1413069           | s                 | rec    | UTI89_C1499 | -         | CDS  |
| UTI89/AS             | 1413114           | s                 | rec    | UTI89_C1499 | -         | CDS  |
| UTI89/AS             | 1351040           | ns                | rec    | UTI89_C1499 | -         | CDS  |
| UTI89/AS             | 1351073           | s                 | rec    | UTI89_C1499 | -         | CDS  |
| UTI89/AS             | 1413180           | s                 | rec    | UTI89_C1499 | -         | CDS  |
| UTI89/AS             | 1351124           | s                 | rec    | UTI89_C1499 | -         | CDS  |
| UTI89/AS             | 1351125           | ns                | rec    | UTI89_C1499 | -         | CDS  |
| UTI89/AS             | 1351126           | ns                | rec    | UTI89_C1499 | -         | CDS  |
| UTI89/AS             | 1413216           | s                 | rec    | UTI89_C1499 | -         | CDS  |
| UTI89/AS             | 1413219           | s                 | rec    | UTI89_C1499 | -         | CDS  |
| UTI89/AS             | 1351166           | s                 | rec    | UTI89_C1499 | -         | CDS  |
| UTI89/AS             | 1351229           | s                 | rec    | UTI89_C1499 | -         | CDS  |
| UTI89/AS             | 1413318           | s                 | rec    | UTI89_C1499 | -         | CDS  |
| UTI89/AS             | 1351250           | s                 | rec    | UTI89_C1499 | -         | CDS  |
| UTI89/AS             | 1351271           | s                 | rec    | UTI89_C1499 | -         | CDS  |

| lineage <sup>a</sup> | site <sup>b</sup> | mutation          |        | gene        | Gene name | Type |
|----------------------|-------------------|-------------------|--------|-------------|-----------|------|
|                      |                   | type <sup>c</sup> | recomb |             |           |      |
| UTI89/AS             | 1413429           | ns                | rec    | UTI89_C1499 | -         | CDS  |
| UTI89                | 1414911           | ns                |        | UTI89_C1500 | -         | CDS  |
| APEC                 | 1353441           | s                 |        | UTI89_C1500 | -         | CDS  |
| APEC                 | 1353845           | ns                | rec    | UTI89_C1501 | -         | CDS  |
| APEC                 | 1353852           | s                 | rec    | UTI89_C1501 | -         | CDS  |
| APEC                 | 1353867           | s                 | rec    | UTI89_C1501 | -         | CDS  |
| APEC                 | 1353890           | ns                | rec    | UTI89_C1501 | -         | CDS  |
| APEC                 | 1353900           | ns                | rec    | UTI89_C1501 | -         | CDS  |
| APEC                 | 1353924           | s                 | rec    | UTI89_C1501 | -         | CDS  |
| APEC                 | 1353927           | s                 | rec    | UTI89_C1501 | -         | CDS  |
| APEC                 | 1353936           | s                 | rec    | UTI89_C1501 | -         | CDS  |
| APEC                 | 1353941           | ns                | rec    | UTI89_C1501 | -         | CDS  |
| APEC                 | 1353942           | ns                | rec    | UTI89_C1501 | -         | CDS  |
| UTI89                | 1416046           | s                 |        | UTI89_C1501 | -         | CDS  |
| S88                  | 1358183           | s                 | rec    | UTI89_C1502 | -         | CDS  |
| S88                  | 1358189           | s                 | rec    | UTI89_C1502 | -         | CDS  |
| S88                  | 1358237           | s                 | rec    | UTI89_C1502 | -         | CDS  |
| S88                  | 1358301           | ns                | rec    | UTI89_C1502 | -         | CDS  |
| S88                  | 1358303           | ns                | rec    | UTI89_C1502 | -         | CDS  |
| S88                  | 1358321           | s                 | rec    | UTI89_C1502 | -         | CDS  |
| S88                  | 1358324           | s                 | rec    | UTI89_C1502 | -         | CDS  |
| S88                  | 1358330           | s                 | rec    | UTI89_C1502 | -         | CDS  |
| S88                  | 1358351           | s                 | rec    | UTI89_C1502 | -         | CDS  |
| S88                  | 1358426           | s                 | rec    | UTI89_C1502 | -         | CDS  |
| S88                  | 1358427           | ns                | rec    | UTI89_C1502 | -         | CDS  |
| S88                  | 1358432           | s                 | rec    | UTI89_C1502 | -         | CDS  |
| S88                  | 1358438           | s                 | rec    | UTI89_C1502 | -         | CDS  |
| S88                  | 1358441           | s                 | rec    | UTI89_C1502 | -         | CDS  |
| S88                  | 1358447           | s                 | rec    | UTI89_C1502 | -         | CDS  |
| S88                  | 1358453           | s                 | rec    | UTI89_C1502 | -         | CDS  |
| S88                  | 1358498           | s                 | rec    | UTI89_C1502 | -         | CDS  |
| S88                  | 1358528           | s                 | rec    | UTI89_C1502 | -         | CDS  |
| S88                  | 1358534           | s                 | rec    | UTI89_C1502 | -         | CDS  |
| S88                  | 1358538           | s                 | rec    | UTI89_C1502 | -         | CDS  |
| S88                  | 1358564           | s                 | rec    | UTI89_C1502 | -         | CDS  |
| S88                  | 1358567           | ns                | rec    | UTI89_C1502 | -         | CDS  |
| S88                  | 1359609           | s                 | rec    | UTI89_C1504 | -         | CDS  |
| S88                  | 1359615           | s                 | rec    | UTI89_C1504 | -         | CDS  |
| S88                  | 1359624           | s                 | rec    | UTI89_C1504 | -         | CDS  |
| S88                  | 1359636           | s                 | rec    | UTI89_C1504 | -         | CDS  |
| S88                  | 1359651           | s                 | rec    | UTI89_C1504 | -         | CDS  |

| lineage <sup>a</sup> | site <sup>b</sup> | mutation          |        | gene        | Gene name | Type |
|----------------------|-------------------|-------------------|--------|-------------|-----------|------|
|                      |                   | type <sup>c</sup> | recomb |             |           |      |
| S88                  | 1359652           | ns                | rec    | UTI89_C1504 | -         | CDS  |
| S88                  | 1359655           | ns                | rec    | UTI89_C1504 | -         | CDS  |
| S88                  | 1361762           | ns                |        | UTI89_C1508 | -         | CDS  |
| UTI89                | 1419789           | ns                |        | UTI89_C1508 | -         | CDS  |
| AS                   | 1360595           | s                 |        | UTI89_C1510 | -         | CDS  |
| S88                  | 1365338           | ns                |        | UTI89_C1511 | -         | CDS  |
| APEC                 | 1361828           | ns                |        | UTI89_C1512 | -         | CDS  |
| UTI89                | 1426400           | s                 |        | UTI89_C1517 | -         | CDS  |
| AS                   | 1364440           | s                 |        | UTI89_C1517 | -         | CDS  |
| AS                   | 1364479           | s                 |        | UTI89_C1517 | -         | CDS  |
| AS                   | 1364488           | s                 |        | UTI89_C1517 | -         | CDS  |
| AS                   | 1364551           | s                 |        | UTI89_C1517 | -         | CDS  |
| AS                   | 1365163           | s                 | rec    | UTI89_C1517 | -         | CDS  |
| AS                   | 1365166           | s                 | rec    | UTI89_C1517 | -         | CDS  |
| AS                   | 1365169           | s                 | rec    | UTI89_C1517 | -         | CDS  |
| AS                   | 1365193           | s                 | rec    | UTI89_C1517 | -         | CDS  |
| AS                   | 1365199           | s                 | rec    | UTI89_C1517 | -         | CDS  |
| AS                   | 1365226           | s                 | rec    | UTI89_C1517 | -         | CDS  |
| AS                   | 1365229           | s                 | rec    | UTI89_C1517 | -         | CDS  |
| AS                   | 1365237           | ns                | rec    | UTI89_C1517 | -         | CDS  |
| AS                   | 1365238           | ns                | rec    | UTI89_C1517 | -         | CDS  |
| AS                   | 1427327           | s                 | rec    | UTI89_C1517 | -         | CDS  |
| AS                   | 1365244           | s                 | rec    | UTI89_C1517 | -         | CDS  |
| S88                  | 1371241           | ns                |        | UTI89_C1517 | -         | CDS  |
| APEC                 | 1385734           | ns                |        | UTI89_C1537 | yciL      | CDS  |
| APEC                 | 1391285           | s                 |        | UTI89_C1543 | topA      | CDS  |
| S88                  | 1396291           | s                 |        | UTI89_C1543 | topA      | CDS  |
| S88                  | 1400475           | s                 |        | UTI89_C1547 | acnA      | CDS  |
| AS                   | 1400452           | ns                |        | UTI89_C1551 | yciM      | CDS  |
| UTI89                | 1462662           | del               |        | intergenic  |           |      |
| APEC                 | 1401489           | ns                |        | UTI89_C1552 | pyrF      | CDS  |
| UTI89                | 1464840           | ns                |        | UTI89_C1556 | -         | CDS  |
| AS                   | 1403009           | s                 |        | UTI89_C1556 | -         | CDS  |
| APEC                 | 1405685           | ins               |        | intergenic  |           |      |
| UTI89                | 1468756           | ns                |        | UTI89_C1559 | rnb       | CDS  |
| AS                   | 1410338           | ns                |        | UTI89_C1562 | -         | CDS  |
| UTI89                | 1473133           | s                 |        | UTI89_C1563 | -         | CDS  |
| APEC                 | 1412333           | ns                |        | UTI89_C1564 | -         | CDS  |
| AS                   | 1415646           | ns                |        | UTI89_C1565 | -         | CDS  |
| AS                   | 1422100           | ns                |        | UTI89_C1571 | sapA      | CDS  |
| S88                  | 1427954           | nc                |        | intergenic  |           |      |



| lineage <sup>a</sup> | site <sup>b</sup> | mutation          |        | gene        | Gene name | Type |
|----------------------|-------------------|-------------------|--------|-------------|-----------|------|
|                      |                   | type <sup>c</sup> | recomb |             |           |      |
| S88                  | 1429509           | s                 |        | UTI89_C1574 | pspA      | CDS  |
| AS                   | 1432913           | ns                |        | UTI89_C1584 | ycjQ      | CDS  |
| AS                   | 1434346           | s                 |        | UTI89_C1586 | ycjS      | CDS  |
| UTI89                | 1500217           | ns                |        | UTI89_C1589 | ycjV      | CDS  |
| AS                   | 1439710           | ns                |        | UTI89_C1590 | ompG      | CDS  |
| UTI89                | 1504398           | ns                |        | UTI89_C1592 | ycjX      | CDS  |
| UTI89                | 1508902           | ns                |        | UTI89_C1596 | ycjG      | CDS  |
| APEC                 | 1457172           | del               |        | intergenic  |           |      |
| AS                   | 1459783           | ns                |        | UTI89_C1610 | -         | CDS  |
| APEC                 | 1466985           | ns                | rec    | UTI89_C1615 | ydaO      | CDS  |
| APEC                 | 1466986           | ns                | rec    | UTI89_C1615 | ydaO      | CDS  |
| APEC                 | 1466987           | s                 | rec    | UTI89_C1615 | ydaO      | CDS  |
| APEC                 | 1466996           | s                 | rec    | UTI89_C1615 | ydaO      | CDS  |
| APEC                 | 1467000           | ns                | rec    | UTI89_C1615 | ydaO      | CDS  |
| APEC                 | 1467002           | ns                | rec    | UTI89_C1615 | ydaO      | CDS  |
| APEC                 | 1467004           | ns                | rec    | UTI89_C1615 | ydaO      | CDS  |
| APEC                 | 1467050           | nc                | rec    | intergenic  |           |      |
| APEC                 | 1467055           | nc                | rec    | intergenic  |           |      |
| APEC                 | 1467095           | ns                | rec    | UTI89_C1616 | -         | CDS  |
| APEC                 | 1467296           | ns                | rec    | UTI89_C1616 | -         | CDS  |
| UTI89                | 1538087           | nc                |        | intergenic  |           |      |
| APEC                 | 1531299           | ns                |        | UTI89_C1624 | ydbH      | CDS  |
| APEC                 | 1533566           | s                 | rec    | UTI89_C1627 | entS      | CDS  |
| APEC                 | 1533827           | s                 | rec    | UTI89_C1627 | entS      | CDS  |
| APEC                 | 1533866           | s                 | rec    | UTI89_C1627 | entS      | CDS  |
| APEC                 | 1533893           | s                 | rec    | UTI89_C1627 | entS      | CDS  |
| APEC                 | 1533899           | s                 | rec    | UTI89_C1627 | entS      | CDS  |
| APEC                 | 1533911           | s                 | rec    | UTI89_C1627 | entS      | CDS  |
| APEC                 | 1533917           | s                 | rec    | UTI89_C1627 | entS      | CDS  |
| APEC                 | 1533932           | s                 | rec    | UTI89_C1627 | entS      | CDS  |
| APEC                 | 1533962           | s                 | rec    | UTI89_C1627 | entS      | CDS  |
| APEC                 | 1533977           | ns                | rec    | UTI89_C1627 | entS      | CDS  |
| APEC                 | 1533985           | ns                | rec    | UTI89_C1627 | entS      | CDS  |
| APEC                 | 1534004           | s                 | rec    | UTI89_C1627 | entS      | CDS  |
| APEC                 | 1534020           | ns                | rec    | UTI89_C1627 | entS      | CDS  |
| APEC                 | 1534028           | s                 | rec    | UTI89_C1627 | entS      | CDS  |
| APEC                 | 1534031           | s                 | rec    | UTI89_C1627 | entS      | CDS  |
| APEC                 | 1534043           | s                 | rec    | UTI89_C1627 | entS      | CDS  |
| APEC                 | 1534057           | ns                | rec    | UTI89_C1627 | entS      | CDS  |
| APEC                 | 1534058           | ns                | rec    | UTI89_C1627 | entS      | CDS  |
| APEC                 | 1534067           | s                 | rec    | UTI89_C1627 | entS      | CDS  |

| lineage <sup>a</sup> | site <sup>b</sup> | mutation          |        | gene        | Gene name | Type |
|----------------------|-------------------|-------------------|--------|-------------|-----------|------|
|                      |                   | type <sup>c</sup> | recomb |             |           |      |
| UTI89                | 1544148           | ns                |        | UTI89_C1627 | entS      | CDS  |
| APEC                 | 1534106           | s                 | rec    | UTI89_C1627 | entS      | CDS  |
| APEC                 | 1534121           | s                 | rec    | UTI89_C1627 | entS      | CDS  |
| APEC                 | 1534181           | s                 | rec    | UTI89_C1627 | entS      | CDS  |
| APEC                 | 1534184           | s                 | rec    | UTI89_C1627 | entS      | CDS  |
| APEC                 | 1534202           | s                 | rec    | UTI89_C1627 | entS      | CDS  |
| APEC                 | 1534205           | s                 | rec    | UTI89_C1627 | entS      | CDS  |
| APEC                 | 1534223           | s                 | rec    | UTI89_C1627 | entS      | CDS  |
| APEC                 | 1534226           | s                 | rec    | UTI89_C1627 | entS      | CDS  |
| APEC                 | 1534229           | s                 | rec    | UTI89_C1627 | entS      | CDS  |
| APEC                 | 1534232           | s                 | rec    | UTI89_C1627 | entS      | CDS  |
| APEC                 | 1534235           | s                 | rec    | UTI89_C1627 | entS      | CDS  |
| APEC                 | 1534256           | s                 | rec    | UTI89_C1627 | entS      | CDS  |
| APEC                 | 1534262           | s                 | rec    | UTI89_C1627 | entS      | CDS  |
| APEC                 | 1534265           | s                 | rec    | UTI89_C1627 | entS      | CDS  |
| APEC                 | 1534268           | s                 | rec    | UTI89_C1627 | entS      | CDS  |
| APEC                 | 1534282           | ns                | rec    | UTI89_C1627 | entS      | CDS  |
| APEC                 | 1534283           | ns                | rec    | UTI89_C1627 | entS      | CDS  |
| APEC                 | 1534292           | s                 | rec    | UTI89_C1627 | entS      | CDS  |
| APEC                 | 1534322           | s                 | rec    | UTI89_C1627 | entS      | CDS  |
| APEC                 | 1534325           | s                 | rec    | UTI89_C1627 | entS      | CDS  |
| APEC                 | 1534349           | s                 | rec    | UTI89_C1627 | entS      | CDS  |
| APEC                 | 1534352           | ns                | rec    | UTI89_C1627 | entS      | CDS  |
| APEC                 | 1534406           | s                 | rec    | UTI89_C1627 | entS      | CDS  |
| S88                  | 1492041           | s                 |        | UTI89_C1627 | entS      | CDS  |
| AS                   | 1539446           | ns                |        | UTI89_C1627 | entS      | CDS  |
| UTI89                | 1552364           | ns                |        | UTI89_C1629 | -         | CDS  |
| APEC                 | 1543645           | ns                |        | UTI89_C1632 | ynbC      | CDS  |
| S88                  | 1497829           | s                 |        | UTI89_C1633 | ynbD      | CDS  |
| UTI89                | 1570842           | s                 |        | UTI89_C1645 | ydcG      | CDS  |
| UTI89                | 1575287           | ns                |        | UTI89_C1650 | tehB      | CDS  |
| AS                   | 1567667           | ns                |        | UTI89_C1654 | ydcP      | CDS  |
| S88                  | 1526738           | ns                |        | UTI89_C1660 | ydcT      | CDS  |
| S88                  | 1530289           | ns                |        | UTI89_C1664 | -         | CDS  |
| S88                  | 1532613           | ns                |        | UTI89_C1670 | yncD      | CDS  |
| UTI89                | 1594231           | ns                |        | UTI89_C1672 | ansP      | CDS  |
| AS                   | 1589975           | del               |        | UTI89_C1678 | -         | CDS  |
| APEC                 | 1600547           | ns                |        | UTI89_C1687 | narU      | CDS  |
| APEC                 | 1607975           | ns                |        | UTI89_C1694 | -         | CDS  |
| APEC                 | 1612991           | nc                |        | intergenic  |           |      |
| AS                   | 1616188           | s                 |        | UTI89_C1705 | yddW      | CDS  |

| lineage <sup>a</sup> | site <sup>b</sup> | mutation          |        | gene        | Gene name | Type |
|----------------------|-------------------|-------------------|--------|-------------|-----------|------|
|                      |                   | type <sup>c</sup> | recomb |             |           |      |
| APEC                 | 1617005           | ns                |        | UTI89_C1705 | yddW      | CDS  |
| S88                  | 1577835           | ns                |        | UTI89_C1709 | yddB      | CDS  |
| APEC                 | 1629186           | s                 |        | UTI89_C1711 | ydeM      | CDS  |
| UTI89                | 1643287           | ns                |        | UTI89_C1713 | -         | CDS  |
| S88                  | 1587189           | ns                |        | UTI89_C1715 | ydeP      | CDS  |
| S88                  | 1588236           | nc                |        | intergenic  |           |      |
| APEC                 | 1636388           | nc                |        | intergenic  |           |      |
| UTI89                | 1647836           | ns                |        | intergenic  |           |      |
| APEC                 | 1639467           | ns                |        | intergenic  |           |      |
| UTI89                | 1648718           | ns                |        | intergenic  |           |      |
| APEC                 | 1643741           | nc                |        | intergenic  |           |      |
| APEC                 | 1645651           | nc                |        | intergenic  |           |      |
| S88                  | 1592868           | nc                |        | intergenic  |           |      |
| APEC                 | 1645926           | ns                |        | UTI89_C1738 | tam       | CDS  |
| APEC                 | 1646034           | ns                |        | UTI89_C1738 | tam       | CDS  |
| S88                  | 1594816           | nc                |        | intergenic  |           |      |
| UTI89                | 1666390           | nc                |        | intergenic  |           |      |
| S88                  | 1609226           | ns                |        | UTI89_C1755 | -         | CDS  |
| AS                   | 1664685           | ns                |        | UTI89_C1758 | ydeD      | CDS  |
| UTI89                | 1683785           | ns                |        | UTI89_C1758 | ydeD      | CDS  |
| AS                   | 1665330           | ns                |        | UTI89_C1758 | ydeD      | CDS  |
| APEC                 | 1674119           | ns                |        | UTI89_C1766 | ydfI      | CDS  |
| AS                   | 1674203           | nc                |        | intergenic  |           |      |
| UTI89                | 1695714           | nc                |        | intergenic  |           |      |
| APEC                 | 1677627           | s                 |        | UTI89_C1770 | ynfB      | CDS  |
| UTI89                | 1697022           | s                 |        | UTI89_C1771 | speG      | CDS  |
| AS                   | 1685262           | s                 |        | UTI89_C1776 | ynfG      | CDS  |
| AS                   | 1686928           | ins               |        | intergenic  |           |      |
| APEC                 | 1689456           | ns                |        | UTI89_C1781 | mlc       | CDS  |
| S88                  | 1658767           | ns                |        | UTI89_C1802 | ydgA      | CDS  |
| APEC                 | 1714212           | ns                |        | UTI89_C1803 | uidC      | CDS  |
| AS                   | 1720762           | ns                |        | UTI89_C1809 | malX      | CDS  |
| APEC                 | 1721140           | ns                |        | UTI89_C1809 | malX      | CDS  |
| S88                  | 1670223           | ns                |        | UTI89_C1810 | malY      | CDS  |
| AS                   | 1727654           | s                 |        | UTI89_C1817 | rnfA      | CDS  |
| APEC                 | 1729381           | ns                |        | UTI89_C1819 | rnfC      | CDS  |
| UTI89                | 1751902           | ns                |        | UTI89_C1823 | nth       | CDS  |
| S88                  | 1687768           | ns                |        | UTI89_C1831 | ydhH      | CDS  |
| APEC                 | 1743172           | del               |        | UTI89_C1835 | ydhJ      | CDS  |
| UTI89                | 1768156           | s                 |        | UTI89_C1842 | gloA      | CDS  |
| APEC                 | 1756863           | nc                |        | intergenic  |           |      |

| lineage <sup>a</sup> | site <sup>b</sup> | mutation          |        | gene        | Gene name | Type |
|----------------------|-------------------|-------------------|--------|-------------|-----------|------|
|                      |                   | type <sup>c</sup> | recomb |             |           |      |
| APEC                 | 1759829           | s                 |        | UTI89_C1853 | ribC      | CDS  |
| APEC                 | 1762934           | ns                |        | UTI89_C1855 | ydhQ      | CDS  |
| APEC                 | 1765066           | ns                |        | UTI89_C1860 | ydhS      | CDS  |
| AS                   | 1766739           | ns                |        | UTI89_C1862 | ydhU      | CDS  |
| S88                  | 1715773           | ns                |        | UTI89_C1864 | ydhW      | CDS  |
| UTI89                | 1794103           | ns                |        | UTI89_C1870 | ynhG      | CDS  |
| AS                   | 1779601           | s                 |        | UTI89_C1875 | sufB      | CDS  |
| APEC                 | 1781484           | nc                |        | intergenic  |           |      |
| APEC                 | 1781844           | nc                |        | intergenic  |           |      |
| APEC                 | 1784095           | s                 |        | UTI89_C1879 | ydiJ      | CDS  |
| S88                  | 1733401           | ns                |        | UTI89_C1880 | ydiK      | CDS  |
| APEC                 | 1787595           | ns                |        | UTI89_C1881 | ydiL      | CDS  |
| APEC                 | 1790450           | ns                |        | UTI89_C1883 | ydiN      | CDS  |
| UTI89                | 1812687           | ns                |        | UTI89_C1886 | ydiF      | CDS  |
| UTI89                | 1819916           | ns                |        | UTI89_C1894 | ydiD      | CDS  |
| APEC                 | 1804423           | s                 |        | UTI89_C1896 | ydiA      | CDS  |
| AS                   | 1808956           | nc                |        | intergenic  |           |      |
| APEC                 | 1824859           | ns                |        | UTI89_C1920 | yniB      | CDS  |
| AS                   | 1825003           | ns                |        | UTI89_C1920 | yniB      | CDS  |
| AS                   | 1825873           | ns                |        | UTI89_C1921 | yniC      | CDS  |
| S88                  | 1775469           | ns                |        | UTI89_C1923 | ydjN      | CDS  |
| S88                  | 1775781           | ns                |        | UTI89_C1924 | cedA      | CDS  |
| S88                  | 1783020           | s                 |        | UTI89_C1930 | celB      | CDS  |
| APEC                 | 1839564           | s                 |        | UTI89_C1936 | ydjR      | CDS  |
| APEC                 | 1844229           | del               |        | UTI89_C1941 | -         | CDS  |
| S88                  | 1800875           | ns                |        | UTI89_C1952 | ynjD      | CDS  |
| AS                   | 1860341           | s                 |        | UTI89_C1958 | topB      | CDS  |
| AS                   | 1862988           | ns                |        | UTI89_C1962 | sppA      | CDS  |
| APEC                 | 1866794           | ns                |        | UTI89_C1965 | ydjE      | CDS  |
| APEC                 | 1870281           | del               |        | UTI89_C1968 | ydjH      | CDS  |
| S88                  | 1818262           | s                 |        | UTI89_C1969 | ydjI      | CDS  |
| S88                  | 1819955           | ns                |        | UTI89_C1971 | ydjK      | CDS  |
| S88                  | 1829635           | nc                |        | intergenic  |           |      |
| APEC                 | 1883756           | nc                |        | intergenic  |           |      |
| S88                  | 1831100           | ns                |        | UTI89_C1981 | yeal      | CDS  |
| AS                   | 1883933           | ns                |        | UTI89_C1981 | yeal      | CDS  |
| S88                  | 1833361           | ns                |        | UTI89_C1982 | yeaJ      | CDS  |
| APEC                 | 1892910           | ns                |        | UTI89_C1994 | yoaG      | CDS  |
| UTI89                | 1913372           | ns                |        | UTI89_C1997 | -         | CDS  |
| S88                  | 1844914           | s                 |        | UTI89_C1999 | fadD      | CDS  |
| APEC                 | 1918643           | s                 |        | UTI89_C2029 | yebQ      | CDS  |

| lineage <sup>a</sup> | site <sup>b</sup> | mutation          |        | gene        | Gene name | Type |
|----------------------|-------------------|-------------------|--------|-------------|-----------|------|
|                      |                   | type <sup>c</sup> | recomb |             |           |      |
| S88                  | 1872194           | ns                |        | UTI89_C2034 | yebS      | CDS  |
| AS                   | 1926811           | ns                |        | UTI89_C2035 | yebT      | CDS  |
| APEC                 | 1933513           | ns                |        | UTI89_C2045 | -         | CDS  |
| APEC                 | 1938743           | nc                |        | intergenic  |           |      |
| S88                  | 1887361           | ns                |        | UTI89_C2053 | eda       | CDS  |
| APEC                 | 1943379           | s                 |        | UTI89_C2055 | zwf       | CDS  |
| APEC                 | 1949476           | ns                |        | UTI89_C2060 | yebA      | CDS  |
| APEC                 | 1954182           | ins               |        | UTI89_C2066 | yebB      | CDS  |
| APEC                 | 1964683           | del               |        | UTI89_C2076 | bisZ      | CDS  |
| UTI89                | 1984824           | nc                |        | intergenic  |           |      |
| APEC                 | 1966763           | s                 |        | UTI89_C2078 | -         | CDS  |
| S88                  | 1917519           | ns                |        | UTI89_C2082 | flhA      | CDS  |
| UTI89                | 1992160           | ns                |        | UTI89_C2084 | -         | CDS  |
| UTI89                | 2015743           | del               |        | intergenic  |           |      |
| AS                   | 1996984           | nc                |        | intergenic  |           |      |
| S88                  | 1945561           | ns                |        | UTI89_C2114 | uvrC      | CDS  |
| AS                   | 1998815           | ns                |        | UTI89_C2114 | uvrC      | CDS  |
| S88                  | 1957323           | s                 |        | UTI89_C2125 | fliD      | CDS  |
| APEC                 | 2015949           | nc                |        | intergenic  |           |      |
| APEC                 | 2016022           | nc                |        | intergenic  |           |      |
| APEC                 | 2021530           | ins               |        | UTI89_C2138 | fliF      | CDS  |
| S88                  | 1969712           | ns                |        | UTI89_C2139 | fliG      | CDS  |
| APEC                 | 2023662           | s                 |        | UTI89_C2140 | fliH      | CDS  |
| APEC                 | 2023867           | ns                |        | UTI89_C2140 | fliH      | CDS  |
| UTI89                | 2049617           | s                 |        | UTI89_C2150 | fliR      | CDS  |
| S88                  | 1978333           | del-5             |        | intergenic  |           |      |
| UTI89                | 2050425           | ns                |        | UTI89_C2151 | rcaA      | CDS  |
| APEC                 | 2035461           | nc                |        | intergenic  |           |      |
| S88                  | 1984090           | ns                |        | UTI89_C2160 | yedA      | CDS  |
| UTI89                | 2058158           | s                 |        | UTI89_C2162 | dcm       | CDS  |
| S88                  | 1988569           | ns                |        | UTI89_C2165 | -         | CDS  |
| S88                  | 1988848           | ns                |        | UTI89_C2165 | -         | CDS  |
| APEC                 | 2042646           | del               |        | intergenic  |           |      |
| UTI89                | 2061411           | ins               |        | intergenic  |           |      |
| APEC                 | 2090717           | nc                |        | intergenic  |           |      |
| AS                   | 2095625           | ns                |        | UTI89_C2180 | -         | CDS  |
| UTI89                | 2080256           | s                 |        | UTI89_C2183 | irp2      | CDS  |
| APEC                 | 2106175           | ns                |        | UTI89_C2184 | irp1      | CDS  |
| AS                   | 2106620           | s                 | rec    | UTI89_C2184 | irp1      | CDS  |
| AS                   | 2106656           | s                 | rec    | UTI89_C2184 | irp1      | CDS  |
| AS                   | 2106662           | s                 | rec    | UTI89_C2184 | irp1      | CDS  |
| AS                   | 2106692           | s                 | rec    | UTI89_C2184 | irp1      | CDS  |

| lineage <sup>a</sup> | site <sup>b</sup> | mutation          |        | gene        | Gene name | Type |
|----------------------|-------------------|-------------------|--------|-------------|-----------|------|
|                      |                   | type <sup>c</sup> | recomb |             |           |      |
| AS                   | 2106698           | s                 | rec    | UTI89_C2184 | irp1      | CDS  |
| AS                   | 2106710           | s                 | rec    | UTI89_C2184 | irp1      | CDS  |
| AS                   | 2106746           | s                 | rec    | UTI89_C2184 | irp1      | CDS  |
| AS                   | 2106764           | s                 | rec    | UTI89_C2184 | irp1      | CDS  |
| AS                   | 2106836           | s                 | rec    | UTI89_C2184 | irp1      | CDS  |
| AS                   | 2106881           | s                 | rec    | UTI89_C2184 | irp1      | CDS  |
| AS                   | 2106887           | s                 | rec    | UTI89_C2184 | irp1      | CDS  |
| AS                   | 2106893           | s                 | rec    | UTI89_C2184 | irp1      | CDS  |
| AS                   | 2106983           | s                 | rec    | UTI89_C2184 | irp1      | CDS  |
| AS                   | 2106995           | s                 | rec    | UTI89_C2184 | irp1      | CDS  |
| AS                   | 2107022           | s                 | rec    | UTI89_C2184 | irp1      | CDS  |
| AS                   | 2107034           | s                 | rec    | UTI89_C2184 | irp1      | CDS  |
| AS                   | 2107035           | ns                | rec    | UTI89_C2184 | irp1      | CDS  |
| AS                   | 2107036           | ns                | rec    | UTI89_C2184 | irp1      | CDS  |
| AS                   | 2107064           | s                 | rec    | UTI89_C2184 | irp1      | CDS  |
| AS                   | 2107067           | s                 | rec    | UTI89_C2184 | irp1      | CDS  |
| AS                   | 2107073           | s                 | rec    | UTI89_C2184 | irp1      | CDS  |
| AS                   | 2107091           | s                 | rec    | UTI89_C2184 | irp1      | CDS  |
| AS                   | 2107124           | s                 | rec    | UTI89_C2184 | irp1      | CDS  |
| AS                   | 2107136           | s                 | rec    | UTI89_C2184 | irp1      | CDS  |
| AS                   | 2107145           | s                 | rec    | UTI89_C2184 | irp1      | CDS  |
| AS                   | 2107152           | s                 | rec    | UTI89_C2184 | irp1      | CDS  |
| AS                   | 2107160           | s                 | rec    | UTI89_C2184 | irp1      | CDS  |
| AS                   | 2107184           | s                 | rec    | UTI89_C2184 | irp1      | CDS  |
| AS                   | 2107190           | s                 | rec    | UTI89_C2184 | irp1      | CDS  |
| AS                   | 2107206           | ns                | rec    | UTI89_C2184 | irp1      | CDS  |
| AS                   | 2107211           | s                 | rec    | UTI89_C2184 | irp1      | CDS  |
| AS                   | 2107220           | s                 | rec    | UTI89_C2184 | irp1      | CDS  |
| AS                   | 2107223           | s                 | rec    | UTI89_C2184 | irp1      | CDS  |
| AS                   | 2107226           | s                 | rec    | UTI89_C2184 | irp1      | CDS  |
| AS                   | 2107235           | s                 | rec    | UTI89_C2184 | irp1      | CDS  |
| AS                   | 2107256           | s                 | rec    | UTI89_C2184 | irp1      | CDS  |
| AS                   | 2107313           | s                 | rec    | UTI89_C2184 | irp1      | CDS  |
| AS                   | 2107344           | ns                | rec    | UTI89_C2184 | irp1      | CDS  |
| AS                   | 2107361           | s                 | rec    | UTI89_C2184 | irp1      | CDS  |
| AS                   | 2107433           | s                 | rec    | UTI89_C2184 | irp1      | CDS  |
| AS                   | 2107434           | ns                | rec    | UTI89_C2184 | irp1      | CDS  |
| AS                   | 2107452           | ns                | rec    | UTI89_C2184 | irp1      | CDS  |
| AS                   | 2107453           | ns                | rec    | UTI89_C2184 | irp1      | CDS  |
| AS                   | 2107466           | s                 | rec    | UTI89_C2184 | irp1      | CDS  |
| AS                   | 2107493           | s                 | rec    | UTI89_C2184 | irp1      | CDS  |

| lineage <sup>a</sup> | site <sup>b</sup> | mutation          |        | gene        | Gene name | Type |
|----------------------|-------------------|-------------------|--------|-------------|-----------|------|
|                      |                   | type <sup>c</sup> | recomb |             |           |      |
| AS                   | 2107496           | s                 | rec    | UTI89_C2184 | irp1      | CDS  |
| AS                   | 2107510           | ns                | rec    | UTI89_C2184 | irp1      | CDS  |
| AS                   | 2107535           | ns                | rec    | UTI89_C2184 | irp1      | CDS  |
| AS                   | 2107545           | ns                | rec    | UTI89_C2184 | irp1      | CDS  |
| AS                   | 2107553           | s                 | rec    | UTI89_C2184 | irp1      | CDS  |
| AS                   | 2107554           | ns                | rec    | UTI89_C2184 | irp1      | CDS  |
| AS                   | 2086816           | ns                | rec    | UTI89_C2184 | irp1      | CDS  |
| AS                   | 2107577           | s                 | rec    | UTI89_C2184 | irp1      | CDS  |
| AS                   | 2107652           | s                 | rec    | UTI89_C2184 | irp1      | CDS  |
| AS                   | 2086910           | ns                | rec    | UTI89_C2184 | irp1      | CDS  |
| AS                   | 2088045           | ns                | rec    | UTI89_C2184 | irp1      | CDS  |
| AS                   | 2088178           | ns                | rec    | UTI89_C2184 | irp1      | CDS  |
| AS                   | 2088614           | s                 | rec    | UTI89_C2184 | irp1      | CDS  |
| AS                   | 2088967           | ns                | rec    | UTI89_C2184 | irp1      | CDS  |
| AS                   | 2089126           | ns                | rec    | UTI89_C2184 | irp1      | CDS  |
| AS                   | 2089136           | s                 | rec    | UTI89_C2184 | irp1      | CDS  |
| AS                   | 2109896           | s                 | rec    | UTI89_C2184 | irp1      | CDS  |
| AS                   | 2089151           | s                 | rec    | UTI89_C2184 | irp1      | CDS  |
| AS                   | 2089226           | s                 | rec    | UTI89_C2184 | irp1      | CDS  |
| AS                   | 2109990           | ns                | rec    | UTI89_C2184 | irp1      | CDS  |
| AS                   | 2110508           | s                 | rec    | UTI89_C2184 | irp1      | CDS  |
| AS                   | 2090138           | s                 | rec    | UTI89_C2184 | irp1      | CDS  |
| AS                   | 2111075           | s                 | rec    | UTI89_C2184 | irp1      | CDS  |
| AS                   | 2090804           | s                 | rec    | UTI89_C2184 | irp1      | CDS  |
| AS                   | 2111603           | s                 | rec    | UTI89_C2184 | irp1      | CDS  |
| AS                   | 2091425           | s                 | rec    | UTI89_C2184 | irp1      | CDS  |
| AS                   | 2114436           | ns                | rec    | UTI89_C2184 | irp1      | CDS  |
| APEC                 | 2114980           | del-2             |        | UTI89_C2184 | irp1      | CDS  |
| AS                   | 2096723           | ns                | rec    | UTI89_C2187 | ybtE      | CDS  |
| AS                   | 2097028           | ns                | rec    | UTI89_C2187 | ybtE      | CDS  |
| AS                   | 2097100           | ns                | rec    | UTI89_C2187 | ybtE      | CDS  |
| AS                   | 2098223           | nc                | rec    | intergenic  |           |      |
| UTI89                | 2098269           | ins               | rec    | intergenic  |           |      |
| AS                   | 2119532           | s                 | rec    | UTI89_C2188 | fyuA      | CDS  |
| AS                   | 2099057           | s                 | rec    | UTI89_C2188 | fyuA      | CDS  |
| AS                   | 2119983           | ns                | rec    | UTI89_C2188 | fyuA      | CDS  |
| AS                   | 2099262           | ns                | rec    | UTI89_C2188 | fyuA      | CDS  |
| AS                   | 2099300           | s                 | rec    | UTI89_C2188 | fyuA      | CDS  |
| AS                   | 2100523           | nc                | rec    | intergenic  |           |      |
| AS                   | 2121430           | nc                | rec    | intergenic  |           |      |
| AS                   | 2101147           | s                 | rec    | UTI89_C2189 | -         | CDS  |

| lineage <sup>a</sup> | site <sup>b</sup> | mutation          |        | gene        | Gene name | Type |
|----------------------|-------------------|-------------------|--------|-------------|-----------|------|
|                      |                   | type <sup>c</sup> | recomb |             |           |      |
| AS                   | 2122122           | ns                | rec    | UTI89_C2189 | -         | CDS  |
| AS                   | 2122149           | ns                | rec    | UTI89_C2189 | -         | CDS  |
| AS                   | 2101471           | s                 | rec    | UTI89_C2189 | -         | CDS  |
| AS                   | 2122906           | s                 | rec    | UTI89_C2191 | -         | CDS  |
| AS                   | 2123830           | s                 | rec    | UTI89_C2191 | -         | CDS  |
| AS                   | 2123872           | s                 | rec    | UTI89_C2191 | -         | CDS  |
| AS                   | 2123874           | ns                | rec    | UTI89_C2191 | -         | CDS  |
| AS                   | 2123900           | ns                | rec    | UTI89_C2191 | -         | CDS  |
| AS                   | 2123952           | ns                | rec    | UTI89_C2191 | -         | CDS  |
| AS                   | 2124077           | ns                | rec    | UTI89_C2191 | -         | CDS  |
| AS                   | 2124085           | nc                | rec    | intergenic  |           |      |
| AS                   | 2124186           | ns                | rec    | UTI89_C2192 | -         | CDS  |
| AS                   | 2124241           | s                 | rec    | UTI89_C2192 | -         | CDS  |
| AS                   | 2124289           | s                 | rec    | UTI89_C2192 | -         | CDS  |
| AS                   | 2124308           | ns                | rec    | UTI89_C2192 | -         | CDS  |
| AS                   | 2124561           | ns                | rec    | UTI89_C2192 | -         | CDS  |
| AS                   | 2124649           | nc                | rec    | intergenic  |           |      |
| AS                   | 2124772           | ns                | rec    | UTI89_C2193 | -         | CDS  |
| AS                   | 2124855           | s                 | rec    | UTI89_C2193 | -         | CDS  |
| AS                   | 2124894           | ns                | rec    | UTI89_C2193 | -         | CDS  |
| AS                   | 2124912           | s                 | rec    | UTI89_C2193 | -         | CDS  |
| AS                   | 2125029           | ns                | rec    | UTI89_C2193 | -         | CDS  |
| AS                   | 2125107           | ns                | rec    | UTI89_C2193 | -         | CDS  |
| AS                   | 2125152           | s                 | rec    | UTI89_C2193 | -         | CDS  |
| AS                   | 2125259           | ns                | rec    | UTI89_C2193 | -         | CDS  |
| AS                   | 2125513           | ns                | rec    | UTI89_C2193 | -         | CDS  |
| AS                   | 2125932           | nc                | rec    | intergenic  |           |      |
| AS                   | 2125960           | nc                | rec    | intergenic  |           |      |
| AS                   | 2126230           | s                 | rec    | UTI89_C2194 | shiA      | CDS  |
| AS                   | 2126947           | s                 | rec    | UTI89_C2194 | shiA      | CDS  |
| AS                   | 2127250           | s                 | rec    | UTI89_C2194 | shiA      | CDS  |
| AS                   | 2127307           | s                 | rec    | UTI89_C2194 | shiA      | CDS  |
| AS                   | 2127337           | ns                | rec    | UTI89_C2194 | shiA      | CDS  |
| AS                   | 2127352           | ns                | rec    | UTI89_C2194 | shiA      | CDS  |
| AS                   | 2127374           | ns                | rec    | UTI89_C2194 | shiA      | CDS  |
| AS                   | 2127376           | ns                | rec    | UTI89_C2194 | shiA      | CDS  |
| AS                   | 2127378           | ns                | rec    | UTI89_C2194 | shiA      | CDS  |
| AS                   | 2127386           | ns                | rec    | UTI89_C2195 | amn       | CDS  |
| AS                   | 2127413           | ns                | rec    | UTI89_C2195 | amn       | CDS  |
| AS                   | 2127726           | s                 | rec    | UTI89_C2195 | amn       | CDS  |
| AS                   | 2127861           | s                 | rec    | UTI89_C2195 | amn       | CDS  |



| lineage <sup>a</sup> | site <sup>b</sup> | mutation          |        | gene        | Gene name | Type |
|----------------------|-------------------|-------------------|--------|-------------|-----------|------|
|                      |                   | type <sup>c</sup> | recomb |             |           |      |
| AS                   | 2127876           | s                 | rec    | UTI89_C2195 | amn       | CDS  |
| AS                   | 2128104           | s                 | rec    | UTI89_C2195 | amn       | CDS  |
| AS                   | 2128252           | ns                | rec    | UTI89_C2195 | amn       | CDS  |
| AS                   | 2128292           | ns                | rec    | UTI89_C2195 | amn       | CDS  |
| AS                   | 2130146           | s                 |        | UTI89_C2197 | -         | CDS  |
| AS                   | 2130361           | nc                |        | intergenic  |           |      |
| AS                   | 2130633           | s                 |        | UTI89_C2199 | yeeO      | CDS  |
| UTI89                | 2110732           | del-3             |        | UTI89_C2199 | yeeO      | CDS  |
| AS                   | 2131875           | s                 | rec    | UTI89_C2199 | yeeO      | CDS  |
| APEC                 | 2131922           | ns                | rec    | UTI89_C2199 | yeeO      | CDS  |
| AS                   | 2131929           | s                 | rec    | UTI89_C2199 | yeeO      | CDS  |
| AS                   | 2131953           | s                 | rec    | UTI89_C2199 | yeeO      | CDS  |
| APEC                 | 2132010           | ins               | rec    | UTI89_C2199 | yeeO      | CDS  |
| AS                   | 2132028           | ns                | rec    | UTI89_C2199 | yeeO      | CDS  |
| APEC                 | 2132046           | ins               | rec    | UTI89_C2199 | yeeO      | CDS  |
| APEC                 | 2132078           | ins               | rec    | UTI89_C2199 | yeeO      | CDS  |
| S88                  | 2039792           | ns                | rec    | UTI89_C2199 | yeeO      | CDS  |
| S88                  | 2039831           | ns                | rec    | UTI89_C2199 | yeeO      | CDS  |
| S88                  | 2039887           | ns                | rec    | UTI89_C2199 | yeeO      | CDS  |
| S88                  | 2039910           | ns                | rec    | UTI89_C2199 | yeeO      | CDS  |
| S88                  | 2040103           | s                 | rec    | UTI89_C2201 | cbl       | CDS  |
| S88                  | 2040124           | s                 | rec    | UTI89_C2201 | cbl       | CDS  |
| S88                  | 2040178           | s                 | rec    | UTI89_C2201 | cbl       | CDS  |
| S88                  | 2040262           | s                 | rec    | UTI89_C2201 | cbl       | CDS  |
| S88                  | 2040337           | s                 | rec    | UTI89_C2201 | cbl       | CDS  |
| S88                  | 2040348           | ns                | rec    | UTI89_C2201 | cbl       | CDS  |
| S88                  | 2040359           | ns                | rec    | UTI89_C2201 | cbl       | CDS  |
| S88                  | 2040391           | s                 | rec    | UTI89_C2201 | cbl       | CDS  |
| S88                  | 2040424           | s                 | rec    | UTI89_C2201 | cbl       | CDS  |
| AS                   | 2132790           | ns                | rec    | UTI89_C2201 | cbl       | CDS  |
| APEC                 | 2132792           | ns                | rec    | UTI89_C2201 | cbl       | CDS  |
| APEC                 | 2132805           | s                 | rec    | UTI89_C2201 | cbl       | CDS  |
| S88                  | 2040488           | ns                | rec    | UTI89_C2201 | cbl       | CDS  |
| APEC                 | 2132844           | s                 | rec    | UTI89_C2201 | cbl       | CDS  |
| S88                  | 2040586           | s                 | rec    | UTI89_C2201 | cbl       | CDS  |
| S88                  | 2040592           | ns                | rec    | UTI89_C2201 | cbl       | CDS  |
| AS                   | 2132949           | s                 | rec    | UTI89_C2201 | cbl       | CDS  |
| S88                  | 2040622           | s                 | rec    | UTI89_C2201 | cbl       | CDS  |
| AS                   | 2132967           | s                 | rec    | UTI89_C2201 | cbl       | CDS  |
| AS                   | 2133012           | s                 | rec    | UTI89_C2201 | cbl       | CDS  |
| APEC                 | 2133060           | s                 | rec    | UTI89_C2201 | cbl       | CDS  |

| lineage <sup>a</sup> | site <sup>b</sup> | mutation          |        | gene        | Gene name | Type |
|----------------------|-------------------|-------------------|--------|-------------|-----------|------|
|                      |                   | type <sup>c</sup> | recomb |             |           |      |
| AS                   | 2133090           | s                 | rec    | UTI89_C2201 | cbl       | CDS  |
| S88                  | 2040787           | s                 | rec    | UTI89_C2201 | cbl       | CDS  |
| AS                   | 2133123           | s                 | rec    | UTI89_C2201 | cbl       | CDS  |
| S88                  | 2040910           | s                 | rec    | UTI89_C2201 | cbl       | CDS  |
| S88                  | 2040976           | s                 | rec    | UTI89_C2201 | cbl       | CDS  |
| S88                  | 2041055           | nc                | rec    | intergenic  |           |      |
| S88                  | 2041197           | s                 | rec    | UTI89_C2202 | nac       | CDS  |
| S88                  | 2041200           | s                 | rec    | UTI89_C2202 | nac       | CDS  |
| S88                  | 2041206           | s                 | rec    | UTI89_C2202 | nac       | CDS  |
| S88                  | 2041227           | s                 | rec    | UTI89_C2202 | nac       | CDS  |
| S88                  | 2041245           | s                 | rec    | UTI89_C2202 | nac       | CDS  |
| S88                  | 2041251           | s                 | rec    | UTI89_C2202 | nac       | CDS  |
| S88                  | 2041302           | s                 | rec    | UTI89_C2202 | nac       | CDS  |
| S88                  | 2041311           | s                 | rec    | UTI89_C2202 | nac       | CDS  |
| S88                  | 2041359           | s                 | rec    | UTI89_C2202 | nac       | CDS  |
| S88                  | 2041413           | s                 | rec    | UTI89_C2202 | nac       | CDS  |
| S88                  | 2041473           | s                 | rec    | UTI89_C2202 | nac       | CDS  |
| AS                   | 2133870           | ns                | rec    | UTI89_C2202 | nac       | CDS  |
| S88                  | 2041563           | s                 | rec    | UTI89_C2202 | nac       | CDS  |
| S88                  | 2041608           | ns                | rec    | UTI89_C2202 | nac       | CDS  |
| S88                  | 2041641           | s                 | rec    | UTI89_C2202 | nac       | CDS  |
| APEC                 | 2134057           | ns                | rec    | UTI89_C2202 | nac       | CDS  |
| S88                  | 2041766           | ns                | rec    | UTI89_C2202 | nac       | CDS  |
| S88                  | 2041824           | s                 | rec    | UTI89_C2202 | nac       | CDS  |
| AS                   | 2134182           | ns                | rec    | UTI89_C2202 | nac       | CDS  |
| S88                  | 2041890           | s                 | rec    | UTI89_C2202 | nac       | CDS  |
| S88                  | 2041911           | s                 | rec    | UTI89_C2202 | nac       | CDS  |
| AS                   | 2134277           | s                 | rec    | UTI89_C2202 | nac       | CDS  |
| S88                  | 2041971           | s                 | rec    | UTI89_C2202 | nac       | CDS  |
| S88                  | 2042044           | ns                | rec    | UTI89_C2202 | nac       | CDS  |
| S88                  | 2042082           | nc                | rec    | intergenic  |           |      |
| APEC                 | 2134423           | nc                | rec    | intergenic  |           |      |
| S88                  | 2042102           | nc                | rec    | intergenic  |           |      |
| AS                   | 2134439           | nc                | rec    | intergenic  |           |      |
| S88                  | 2042119           | nc                | rec    | intergenic  |           |      |
| S88                  | 2042120           | nc                | rec    | intergenic  |           |      |
| S88                  | 2042170           | nc                | rec    | intergenic  |           |      |
| S88                  | 2042176           | nc                | rec    | intergenic  |           |      |
| S88                  | 2042178           | nc                | rec    | intergenic  |           |      |
| S88                  | 2042189           | nc                | rec    | intergenic  |           |      |
| S88                  | 2042193           | nc                | rec    | intergenic  |           |      |

| lineage <sup>a</sup> | site <sup>b</sup> | mutation          |        | gene       | Gene name | Type |
|----------------------|-------------------|-------------------|--------|------------|-----------|------|
|                      |                   | type <sup>c</sup> | recomb |            |           |      |
| AS                   | 2134540           | nc                | rec    | intergenic |           |      |
| S88                  | 2042237           | del               | rec    | intergenic |           |      |
| S88                  | 2042251           | nc                | rec    | intergenic |           |      |
| S88                  | 2042256           | nc                | rec    | intergenic |           |      |
| AS                   | 2134604           | nc                | rec    | intergenic |           |      |
| S88                  | 2042450           | nc                | rec    | intergenic |           |      |
| S88                  | 2042567           | nc                | rec    | intergenic |           |      |
| S88                  | 2052208           | nc                | rec    | intergenic |           |      |
| S88                  | 2052480           | nc                | rec    | intergenic |           |      |
| S88                  | 2052825           | nc                | rec    | intergenic |           |      |
| S88                  | 2053177           | nc                | rec    | intergenic |           |      |
| APEC                 | 2145532           | nc                | rec    | intergenic |           |      |
| S88                  | 2053244           | nc                | rec    | intergenic |           |      |
| APEC                 | 2145646           | nc                | rec    | intergenic |           |      |
| APEC                 | 2145732           | nc                | rec    | intergenic |           |      |
| S88                  | 2053408           | nc                | rec    | intergenic |           |      |
| APEC                 | 2146193           | nc                | rec    | intergenic |           |      |
| S88                  | 2054020           | nc                | rec    | intergenic |           |      |
| APEC                 | 2146832           | nc                | rec    | intergenic |           |      |
| APEC                 | 2146935           | nc                | rec    | intergenic |           |      |
| APEC                 | 2146973           | nc                | rec    | intergenic |           |      |
| APEC                 | 2147028           | nc                | rec    | intergenic |           |      |
| APEC                 | 2147033           | nc                | rec    | intergenic |           |      |
| APEC                 | 2147070           | nc                | rec    | intergenic |           |      |
| APEC                 | 2147092           | nc                | rec    | intergenic |           |      |
| S88                  | 2055203           | nc                | rec    | intergenic |           |      |
| APEC                 | 2147678           | nc                | rec    | intergenic |           |      |
| S88                  | 2055354           | ins-3             | rec    | intergenic |           |      |
| APEC                 | 2147719           | nc                | rec    | intergenic |           |      |
| APEC                 | 2147735           | nc                | rec    | intergenic |           |      |
| APEC                 | 2147738           | nc                | rec    | intergenic |           |      |
| APEC                 | 2147746           | nc                | rec    | intergenic |           |      |
| APEC                 | 2147945           | nc                | rec    | intergenic |           |      |
| S88                  | 2056361           | nc                | rec    | intergenic |           |      |
| APEC                 | 2149052           | nc                | rec    | intergenic |           |      |
| APEC                 | 2149719           | nc                | rec    | intergenic |           |      |
| APEC                 | 2149814           | nc                | rec    | intergenic |           |      |
| APEC                 | 2150121           | nc                | rec    | intergenic |           |      |
| APEC                 | 2150230           | nc                | rec    | intergenic |           |      |
| APEC                 | 2150632           | ins               | rec    | intergenic |           |      |
| APEC                 | 2150633           | nc                | rec    | intergenic |           |      |

| lineage <sup>a</sup> | site <sup>b</sup> | mutation          |        | gene        | Gene name | Type |
|----------------------|-------------------|-------------------|--------|-------------|-----------|------|
|                      |                   | type <sup>c</sup> | recomb |             |           |      |
| UTI89                | 2193784           | del-7             | rec    | intergenic  |           |      |
| S88                  | 2060851           | ins               | rec    | intergenic  |           |      |
| UTI89/AS             | 2150697           | nc                | rec    | intergenic  |           |      |
| UTI89/AS             | 2150875           | s                 | rec    | UTI89_C2254 | -         | CDS  |
| APEC                 | 2150877           | s                 | rec    | UTI89_C2254 | -         | CDS  |
| UTI89/AS             | 2150893           | ns                | rec    | UTI89_C2254 | -         | CDS  |
| UTI89/AS             | 2195518           | ns                | rec    | UTI89_C2254 | -         | CDS  |
| UTI89/AS             | 2150925           | s                 | rec    | UTI89_C2254 | -         | CDS  |
| UTI89/AS             | 2195647           | nc                | rec    | intergenic  |           |      |
| S88                  | 2061554           | s                 | rec    | UTI89_C2255 | -         | CDS  |
| UTI89/AS             | 2151388           | ns                | rec    | UTI89_C2255 | -         | CDS  |
| S88                  | 2061644           | s                 | rec    | UTI89_C2255 | -         | CDS  |
| APEC                 | 2151479           | ns                | rec    | UTI89_C2255 | -         | CDS  |
| UTI89/AS             | 2151716           | nc                | rec    | intergenic  |           |      |
| APEC                 | 2151902           | nc                | rec    | intergenic  |           |      |
| UTI89/AS             | 2151947           | nc                | rec    | intergenic  |           |      |
| AS                   | 2152137           | del               | rec    | UTI89_C2256 | -         | CDS  |
| S88                  | 2062555           | ns                | rec    | UTI89_C2256 | -         | CDS  |
| S88                  | 2062561           | ns                | rec    | UTI89_C2256 | -         | CDS  |
| S88                  | 2062572           | s                 | rec    | UTI89_C2256 | -         | CDS  |
| S88                  | 2062717           | nc                | rec    | intergenic  |           |      |
| S88                  | 2062719           | nc                | rec    | intergenic  |           |      |
| S88                  | 2062773           | nc                | rec    | intergenic  |           |      |
| S88                  | 2062787           | nc                | rec    | intergenic  |           |      |
| S88                  | 2115356           | ns                | rec    | intergenic  |           |      |
| S88                  | 2115380           | ns                | rec    | intergenic  |           |      |
| S88                  | 2115452           | ns                | rec    | intergenic  |           |      |
| UTI89                | 2256041           | s                 | rec    | intergenic  |           |      |
| S88                  | 2115473           | ns                | rec    | intergenic  |           |      |
| S88                  | 2115475           | ns                | rec    | intergenic  |           |      |
| S88                  | 2115476           | ns                | rec    | intergenic  |           |      |
| S88                  | 2115479           | ns                | rec    | intergenic  |           |      |
| S88                  | 2115483           | ns                | rec    | intergenic  |           |      |
| S88                  | 2115487           | ns                | rec    | intergenic  |           |      |
| S88                  | 2115488           | ns                | rec    | intergenic  |           |      |
| S88                  | 2115491           | ns                | rec    | intergenic  |           |      |
| S88                  | 2115492           | ns                | rec    | intergenic  |           |      |
| S88                  | 2115497           | ns                | rec    | intergenic  |           |      |
| S88                  | 2115516           | ns                | rec    | intergenic  |           |      |
| S88                  | 2115520           | s                 | rec    | intergenic  |           |      |
| S88                  | 2115534           | ns                | rec    | intergenic  |           |      |
| S88                  | 2115551           | nc                | rec    | intergenic  |           |      |

| lineage <sup>a</sup> | site <sup>b</sup> | mutation          |        | gene        | Gene name | Type |
|----------------------|-------------------|-------------------|--------|-------------|-----------|------|
|                      |                   | type <sup>c</sup> | recomb |             |           |      |
| S88                  | 2115553           | nc                | rec    | intergenic  |           |      |
| S88                  | 2115732           | ns                | rec    | UTI89_C2319 | wzxC      | CDS  |
| S88                  | 2115812           | s                 | rec    | UTI89_C2319 | wzxC      | CDS  |
| S88                  | 2115815           | s                 | rec    | UTI89_C2319 | wzxC      | CDS  |
| S88                  | 2115836           | s                 | rec    | UTI89_C2319 | wzxC      | CDS  |
| S88                  | 2115839           | s                 | rec    | UTI89_C2319 | wzxC      | CDS  |
| UTI89                | 2256495           | ns                | rec    | UTI89_C2319 | wzxC      | CDS  |
| UTI89                | 2256497           | ns                | rec    | UTI89_C2319 | wzxC      | CDS  |
| UTI89                | 2256498           | s                 | rec    | UTI89_C2319 | wzxC      | CDS  |
| UTI89                | 2256501           | s                 | rec    | UTI89_C2319 | wzxC      | CDS  |
| S88                  | 2115941           | s                 | rec    | UTI89_C2319 | wzxC      | CDS  |
| S88                  | 2116019           | s                 | rec    | UTI89_C2319 | wzxC      | CDS  |
| S88                  | 2116031           | s                 | rec    | UTI89_C2319 | wzxC      | CDS  |
| UTI89                | 2256649           | ns                | rec    | UTI89_C2319 | wzxC      | CDS  |
| UTI89                | 2256657           | s                 | rec    | UTI89_C2319 | wzxC      | CDS  |
| UTI89                | 2256660           | s                 | rec    | UTI89_C2319 | wzxC      | CDS  |
| UTI89                | 2256666           | s                 | rec    | UTI89_C2319 | wzxC      | CDS  |
| UTI89                | 2256759           | s                 | rec    | UTI89_C2319 | wzxC      | CDS  |
| UTI89                | 2256774           | s                 | rec    | UTI89_C2319 | wzxC      | CDS  |
| S88                  | 2116199           | s                 | rec    | UTI89_C2319 | wzxC      | CDS  |
| UTI89                | 2256798           | s                 | rec    | UTI89_C2319 | wzxC      | CDS  |
| S88                  | 2116235           | s                 | rec    | UTI89_C2319 | wzxC      | CDS  |
| UTI89                | 2256843           | s                 | rec    | UTI89_C2319 | wzxC      | CDS  |
| UTI89                | 2256882           | s                 | rec    | UTI89_C2319 | wzxC      | CDS  |
| UTI89                | 2256891           | s                 | rec    | UTI89_C2319 | wzxC      | CDS  |
| S88                  | 2116355           | s                 | rec    | UTI89_C2319 | wzxC      | CDS  |
| S88                  | 2116415           | s                 | rec    | UTI89_C2319 | wzxC      | CDS  |
| S88                  | 2116418           | s                 | rec    | UTI89_C2319 | wzxC      | CDS  |
| S88                  | 2116442           | s                 | rec    | UTI89_C2319 | wzxC      | CDS  |
| S88                  | 2116487           | s                 | rec    | UTI89_C2319 | wzxC      | CDS  |
| S88                  | 2116514           | s                 | rec    | UTI89_C2319 | wzxC      | CDS  |
| S88                  | 2116556           | s                 | rec    | UTI89_C2319 | wzxC      | CDS  |
| S88                  | 2116625           | s                 | rec    | UTI89_C2319 | wzxC      | CDS  |
| S88                  | 2116717           | s                 | rec    | UTI89_C2319 | wzxC      | CDS  |
| S88                  | 2116727           | s                 | rec    | UTI89_C2319 | wzxC      | CDS  |
| S88                  | 2116731           | ns                | rec    | UTI89_C2319 | wzxC      | CDS  |
| UTI89                | 2257335           | s                 | rec    | UTI89_C2319 | wzxC      | CDS  |
| S88                  | 2116778           | s                 | rec    | UTI89_C2319 | wzxC      | CDS  |
| S88                  | 2116952           | s                 | rec    | UTI89_C2319 | wzxC      | CDS  |
| S88                  | 2116982           | s                 | rec    | UTI89_C2319 | wzxC      | CDS  |
| S88                  | 2117160           | s                 | rec    | UTI89_C2320 | wcaJ      | CDS  |

| lineage <sup>a</sup> | site <sup>b</sup> | mutation          |        | gene        | Gene name | Type |
|----------------------|-------------------|-------------------|--------|-------------|-----------|------|
|                      |                   | type <sup>c</sup> | recomb |             |           |      |
| S88                  | 2117220           | s                 | rec    | UTI89_C2320 | wcaJ      | CDS  |
| S88                  | 2117283           | s                 | rec    | UTI89_C2320 | wcaJ      | CDS  |
| S88                  | 2117289           | s                 | rec    | UTI89_C2320 | wcaJ      | CDS  |
| UTI89                | 2257888           | s                 | rec    | UTI89_C2320 | wcaJ      | CDS  |
| UTI89                | 2257891           | s                 | rec    | UTI89_C2320 | wcaJ      | CDS  |
| S88                  | 2117339           | s                 | rec    | UTI89_C2320 | wcaJ      | CDS  |
| UTI89                | 2257921           | s                 | rec    | UTI89_C2320 | wcaJ      | CDS  |
| UTI89                | 2257978           | s                 | rec    | UTI89_C2320 | wcaJ      | CDS  |
| S88                  | 2117484           | s                 | rec    | UTI89_C2320 | wcaJ      | CDS  |
| S88                  | 2117514           | s                 | rec    | UTI89_C2320 | wcaJ      | CDS  |
| S88                  | 2117520           | s                 | rec    | UTI89_C2320 | wcaJ      | CDS  |
| S88                  | 2117523           | s                 | rec    | UTI89_C2320 | wcaJ      | CDS  |
| S88                  | 2117544           | s                 | rec    | UTI89_C2320 | wcaJ      | CDS  |
| S88                  | 2117559           | s                 | rec    | UTI89_C2320 | wcaJ      | CDS  |
| S88                  | 2117601           | s                 | rec    | UTI89_C2320 | wcaJ      | CDS  |
| S88                  | 2117610           | s                 | rec    | UTI89_C2320 | wcaJ      | CDS  |
| UTI89                | 2258245           | s                 | rec    | UTI89_C2320 | wcaJ      | CDS  |
| S88                  | 2117681           | ns                | rec    | UTI89_C2320 | wcaJ      | CDS  |
| UTI89                | 2258260           | s                 | rec    | UTI89_C2320 | wcaJ      | CDS  |
| S88                  | 2117685           | s                 | rec    | UTI89_C2320 | wcaJ      | CDS  |
| S88                  | 2117691           | s                 | rec    | UTI89_C2320 | wcaJ      | CDS  |
| S88                  | 2117697           | s                 | rec    | UTI89_C2320 | wcaJ      | CDS  |
| S88                  | 2117709           | s                 | rec    | UTI89_C2320 | wcaJ      | CDS  |
| S88                  | 2117790           | s                 | rec    | UTI89_C2320 | wcaJ      | CDS  |
| S88                  | 2117832           | s                 | rec    | UTI89_C2320 | wcaJ      | CDS  |
| UTI89                | 2258422           | s                 | rec    | UTI89_C2320 | wcaJ      | CDS  |
| S88                  | 2117880           | s                 | rec    | UTI89_C2320 | wcaJ      | CDS  |
| S88                  | 2117904           | s                 | rec    | UTI89_C2320 | wcaJ      | CDS  |
| S88                  | 2118044           | ns                | rec    | UTI89_C2320 | wcaJ      | CDS  |
| UTI89                | 2258623           | s                 | rec    | UTI89_C2320 | wcaJ      | CDS  |
| S88                  | 2118075           | s                 | rec    | UTI89_C2320 | wcaJ      | CDS  |
| UTI89                | 2258719           | s                 | rec    | UTI89_C2320 | wcaJ      | CDS  |
| S88                  | 2118162           | s                 | rec    | UTI89_C2320 | wcaJ      | CDS  |
| UTI89                | 2258806           | s                 | rec    | UTI89_C2320 | wcaJ      | CDS  |
| S88                  | 2118312           | s                 | rec    | UTI89_C2320 | wcaJ      | CDS  |
| UTI89                | 2259037           | nc                | rec    | intergenic  |           |      |
| S88                  | 2118465           | ins               | rec    | intergenic  |           |      |
| S88                  | 2118546           | s                 | rec    | UTI89_C2321 | cpsG      | CDS  |
| UTI89                | 2259164           | ns                | rec    | UTI89_C2321 | cpsG      | CDS  |
| S88                  | 2118594           | s                 | rec    | UTI89_C2321 | cpsG      | CDS  |
| UTI89                | 2259198           | s                 | rec    | UTI89_C2321 | cpsG      | CDS  |

| lineage <sup>a</sup> | site <sup>b</sup> | mutation          |        | gene        | Gene name | Type |
|----------------------|-------------------|-------------------|--------|-------------|-----------|------|
|                      |                   | type <sup>c</sup> | recomb |             |           |      |
| UTI89                | 2259234           | s                 | rec    | UTI89_C2321 | cpsG      | CDS  |
| UTI89                | 2259243           | s                 | rec    | UTI89_C2321 | cpsG      | CDS  |
| UTI89                | 2259273           | s                 | rec    | UTI89_C2321 | cpsG      | CDS  |
| S88                  | 2118699           | ns                | rec    | UTI89_C2321 | cpsG      | CDS  |
| UTI89                | 2259279           | s                 | rec    | UTI89_C2321 | cpsG      | CDS  |
| S88                  | 2118743           | ns                | rec    | UTI89_C2321 | cpsG      | CDS  |
| S88                  | 2118765           | s                 | rec    | UTI89_C2321 | cpsG      | CDS  |
| UTI89                | 2259462           | s                 | rec    | UTI89_C2321 | cpsG      | CDS  |
| S88                  | 2118891           | s                 | rec    | UTI89_C2321 | cpsG      | CDS  |
| S88                  | 2118939           | s                 | rec    | UTI89_C2321 | cpsG      | CDS  |
| S88                  | 2118945           | s                 | rec    | UTI89_C2321 | cpsG      | CDS  |
| S88                  | 2118954           | s                 | rec    | UTI89_C2321 | cpsG      | CDS  |
| UTI89                | 2259626           | s                 | rec    | UTI89_C2321 | cpsG      | CDS  |
| UTI89                | 2259627           | s                 | rec    | UTI89_C2321 | cpsG      | CDS  |
| UTI89                | 2259642           | s                 | rec    | UTI89_C2321 | cpsG      | CDS  |
| S88                  | 2119101           | s                 | rec    | UTI89_C2321 | cpsG      | CDS  |
| S88                  | 2119179           | s                 | rec    | UTI89_C2321 | cpsG      | CDS  |
| S88                  | 2119191           | s                 | rec    | UTI89_C2321 | cpsG      | CDS  |
| UTI89                | 2259770           | s                 | rec    | UTI89_C2321 | cpsG      | CDS  |
| S88                  | 2119239           | s                 | rec    | UTI89_C2321 | cpsG      | CDS  |
| S88                  | 2119251           | s                 | rec    | UTI89_C2321 | cpsG      | CDS  |
| S88                  | 2119257           | s                 | rec    | UTI89_C2321 | cpsG      | CDS  |
| S88                  | 2119260           | s                 | rec    | UTI89_C2321 | cpsG      | CDS  |
| S88                  | 2119293           | s                 | rec    | UTI89_C2321 | cpsG      | CDS  |
| UTI89                | 2259873           | s                 | rec    | UTI89_C2321 | cpsG      | CDS  |
| UTI89                | 2259876           | s                 | rec    | UTI89_C2321 | cpsG      | CDS  |
| UTI89                | 2259927           | s                 | rec    | UTI89_C2321 | cpsG      | CDS  |
| UTI89                | 2259939           | s                 | rec    | UTI89_C2321 | cpsG      | CDS  |
| UTI89                | 2259970           | ns                | rec    | UTI89_C2321 | cpsG      | CDS  |
| S88                  | 2119404           | s                 | rec    | UTI89_C2321 | cpsG      | CDS  |
| UTI89                | 2260009           | ns                | rec    | UTI89_C2321 | cpsG      | CDS  |
| UTI89                | 2260020           | s                 | rec    | UTI89_C2321 | cpsG      | CDS  |
| S88                  | 2119449           | s                 | rec    | UTI89_C2321 | cpsG      | CDS  |
| S88                  | 2119464           | s                 | rec    | UTI89_C2321 | cpsG      | CDS  |
| S88                  | 2119497           | s                 | rec    | UTI89_C2321 | cpsG      | CDS  |
| UTI89                | 2260152           | s                 | rec    | UTI89_C2321 | cpsG      | CDS  |
| S88                  | 2119590           | s                 | rec    | UTI89_C2321 | cpsG      | CDS  |
| S88                  | 2119617           | s                 | rec    | UTI89_C2321 | cpsG      | CDS  |
| UTI89                | 2260212           | s                 | rec    | UTI89_C2321 | cpsG      | CDS  |
| S88                  | 2119638           | s                 | rec    | UTI89_C2321 | cpsG      | CDS  |
| UTI89                | 2260389           | s                 | rec    | UTI89_C2321 | cpsG      | CDS  |

| lineage <sup>a</sup> | site <sup>b</sup> | mutation          |        | gene        | Gene name | Type |
|----------------------|-------------------|-------------------|--------|-------------|-----------|------|
|                      |                   | type <sup>c</sup> | recomb |             |           |      |
| S88                  | 2119854           | s                 | rec    | UTI89_C2321 | cpsG      | CDS  |
| S88                  | 2119925           | ns                | rec    | UTI89_C2322 | -         | CDS  |
| S88                  | 2119983           | s                 | rec    | UTI89_C2322 | -         | CDS  |
| UTI89                | 2260585           | ns                | rec    | UTI89_C2322 | -         | CDS  |
| S88                  | 2120032           | ns                | rec    | UTI89_C2322 | -         | CDS  |
| S88                  | 2120112           | s                 | rec    | UTI89_C2323 | cpsB      | CDS  |
| S88                  | 2120157           | s                 | rec    | UTI89_C2323 | cpsB      | CDS  |
| APEC                 | 2210287           | s                 | rec    | UTI89_C2323 | cpsB      | CDS  |
| S88                  | 2120220           | s                 | rec    | UTI89_C2323 | cpsB      | CDS  |
| UTI89/AS             | 2210305           | s                 | rec    | UTI89_C2323 | cpsB      | CDS  |
| APEC                 | 2210323           | s                 | rec    | UTI89_C2323 | cpsB      | CDS  |
| UTI89/AS             | 2210329           | s                 | rec    | UTI89_C2323 | cpsB      | CDS  |
| APEC                 | 2210332           | s                 | rec    | UTI89_C2323 | cpsB      | CDS  |
| UTI89/AS             | 2260839           | s                 | rec    | UTI89_C2323 | cpsB      | CDS  |
| APEC                 | 2210356           | s                 | rec    | UTI89_C2323 | cpsB      | CDS  |
| APEC                 | 2210374           | s                 | rec    | UTI89_C2323 | cpsB      | CDS  |
| APEC                 | 2210416           | s                 | rec    | UTI89_C2323 | cpsB      | CDS  |
| S88                  | 2120337           | s                 | rec    | UTI89_C2323 | cpsB      | CDS  |
| S88                  | 2120340           | s                 | rec    | UTI89_C2323 | cpsB      | CDS  |
| UTI89/AS             | 2210452           | s                 | rec    | UTI89_C2323 | cpsB      | CDS  |
| S88                  | 2120393           | s                 | rec    | UTI89_C2323 | cpsB      | CDS  |
| UTI89/AS             | 2260989           | s                 | rec    | UTI89_C2323 | cpsB      | CDS  |
| APEC                 | 2210530           | s                 | rec    | UTI89_C2323 | cpsB      | CDS  |
| S88                  | 2120463           | s                 | rec    | UTI89_C2323 | cpsB      | CDS  |
| UTI89/AS             | 2210557           | s                 | rec    | UTI89_C2323 | cpsB      | CDS  |
| S88                  | 2120541           | s                 | rec    | UTI89_C2323 | cpsB      | CDS  |
| APEC                 | 2210641           | s                 | rec    | UTI89_C2323 | cpsB      | CDS  |
| APEC                 | 2210662           | s                 | rec    | UTI89_C2323 | cpsB      | CDS  |
| UTI89/AS             | 2210665           | s                 | rec    | UTI89_C2323 | cpsB      | CDS  |
| UTI89/AS             | 2261190           | s                 | rec    | UTI89_C2323 | cpsB      | CDS  |
| S88                  | 2120628           | s                 | rec    | UTI89_C2323 | cpsB      | CDS  |
| S88                  | 2120631           | s                 | rec    | UTI89_C2323 | cpsB      | CDS  |
| APEC                 | 2210722           | s                 | rec    | UTI89_C2323 | cpsB      | CDS  |
| APEC                 | 2210740           | s                 | rec    | UTI89_C2323 | cpsB      | CDS  |
| UTI89/AS             | 2210773           | s                 | rec    | UTI89_C2323 | cpsB      | CDS  |
| UTI89/AS             | 2210809           | s                 | rec    | UTI89_C2323 | cpsB      | CDS  |
| UTI89/AS             | 2210815           | s                 | rec    | UTI89_C2323 | cpsB      | CDS  |
| UTI89/AS             | 2210824           | s                 | rec    | UTI89_C2323 | cpsB      | CDS  |
| S88                  | 2120754           | s                 | rec    | UTI89_C2323 | cpsB      | CDS  |
| S88                  | 2120799           | s                 | rec    | UTI89_C2323 | cpsB      | CDS  |
| APEC                 | 2210887           | s                 | rec    | UTI89_C2323 | cpsB      | CDS  |



| lineage <sup>a</sup> | site <sup>b</sup> | mutation          |        | gene        | Gene name | Type |
|----------------------|-------------------|-------------------|--------|-------------|-----------|------|
|                      |                   | type <sup>c</sup> | recomb |             |           |      |
| S88                  | 2120811           | s                 | rec    | UTI89_C2323 | cpsB      | CDS  |
| UTI89/AS             | 2261397           | s                 | rec    | UTI89_C2323 | cpsB      | CDS  |
| UTI89/AS             | 2261403           | s                 | rec    | UTI89_C2323 | cpsB      | CDS  |
| UTI89/AS             | 2261424           | ns                | rec    | UTI89_C2323 | cpsB      | CDS  |
| APEC                 | 2210931           | ns                | rec    | UTI89_C2323 | cpsB      | CDS  |
| APEC                 | 2210938           | s                 | rec    | UTI89_C2323 | cpsB      | CDS  |
| APEC                 | 2210953           | s                 | rec    | UTI89_C2323 | cpsB      | CDS  |
| UTI89/AS             | 2261472           | s                 | rec    | UTI89_C2323 | cpsB      | CDS  |
| UTI89/AS             | 2210983           | s                 | rec    | UTI89_C2323 | cpsB      | CDS  |
| UTI89/AS             | 2210995           | s                 | rec    | UTI89_C2323 | cpsB      | CDS  |
| S88                  | 2120966           | ns                | rec    | UTI89_C2323 | cpsB      | CDS  |
| S88                  | 2121012           | s                 | rec    | UTI89_C2323 | cpsB      | CDS  |
| S88                  | 2121096           | s                 | rec    | UTI89_C2323 | cpsB      | CDS  |
| UTI89/AS             | 2211219           | s                 | rec    | UTI89_C2323 | cpsB      | CDS  |
| UTI89/AS             | 2211220           | s                 | rec    | UTI89_C2323 | cpsB      | CDS  |
| UTI89/AS             | 2211232           | s                 | rec    | UTI89_C2323 | cpsB      | CDS  |
| UTI89/AS             | 2211239           | ns                | rec    | UTI89_C2323 | cpsB      | CDS  |
| UTI89/AS             | 2261781           | s                 | rec    | UTI89_C2323 | cpsB      | CDS  |
| UTI89/AS             | 2261802           | s                 | rec    | UTI89_C2323 | cpsB      | CDS  |
| UTI89/AS             | 2261826           | s                 | rec    | UTI89_C2323 | cpsB      | CDS  |
| UTI89/AS             | 2261832           | s                 | rec    | UTI89_C2323 | cpsB      | CDS  |
| UTI89/AS             | 2261835           | s                 | rec    | UTI89_C2323 | cpsB      | CDS  |
| UTI89/AS             | 2261922           | s                 | rec    | UTI89_C2323 | cpsB      | CDS  |
| S88                  | 2121372           | ns                | rec    | UTI89_C2323 | cpsB      | CDS  |
| S88                  | 2121402           | s                 | rec    | UTI89_C2323 | cpsB      | CDS  |
| S88                  | 2121578           | s                 | rec    | UTI89_C2324 | wcal      | CDS  |
| S88                  | 2121584           | s                 | rec    | UTI89_C2324 | wcal      | CDS  |
| UTI89/AS             | 2262170           | ns                | rec    | UTI89_C2324 | wcal      | CDS  |
| UTI89/AS             | 2262172           | ns                | rec    | UTI89_C2324 | wcal      | CDS  |
| UTI89/AS             | 2211678           | s                 | rec    | UTI89_C2324 | wcal      | CDS  |
| S88                  | 2121651           | ns                | rec    | UTI89_C2324 | wcal      | CDS  |
| APEC                 | 2211753           | s                 | rec    | UTI89_C2324 | wcal      | CDS  |
| UTI89/AS             | 2262257           | s                 | rec    | UTI89_C2324 | wcal      | CDS  |
| S88                  | 2121687           | ns                | rec    | UTI89_C2324 | wcal      | CDS  |
| S88                  | 2121689           | s                 | rec    | UTI89_C2324 | wcal      | CDS  |
| APEC                 | 2211774           | s                 | rec    | UTI89_C2324 | wcal      | CDS  |
| APEC                 | 2211777           | s                 | rec    | UTI89_C2324 | wcal      | CDS  |
| APEC                 | 2211828           | s                 | rec    | UTI89_C2324 | wcal      | CDS  |
| APEC                 | 2211861           | s                 | rec    | UTI89_C2324 | wcal      | CDS  |
| UTI89/AS             | 2211876           | s                 | rec    | UTI89_C2324 | wcal      | CDS  |
| S88                  | 2121842           | s                 | rec    | UTI89_C2324 | wcal      | CDS  |

| lineage <sup>a</sup> | site <sup>b</sup> | mutation          |        | gene        | Gene name | Type |
|----------------------|-------------------|-------------------|--------|-------------|-----------|------|
|                      |                   | type <sup>c</sup> | recomb |             |           |      |
| UTI89/AS             | 2262422           | s                 | rec    | UTI89_C2324 | wcal      | CDS  |
| APEC                 | 2211934           | ns                | rec    | UTI89_C2324 | wcal      | CDS  |
| UTI89/AS             | 2211937           | ns                | rec    | UTI89_C2324 | wcal      | CDS  |
| APEC                 | 2211942           | s                 | rec    | UTI89_C2324 | wcal      | CDS  |
| APEC                 | 2211951           | s                 | rec    | UTI89_C2324 | wcal      | CDS  |
| S88                  | 2121881           | ns                | rec    | UTI89_C2324 | wcal      | CDS  |
| APEC                 | 2211972           | s                 | rec    | UTI89_C2324 | wcal      | CDS  |
| APEC                 | 2212020           | s                 | rec    | UTI89_C2324 | wcal      | CDS  |
| S88                  | 2121945           | ns                | rec    | UTI89_C2324 | wcal      | CDS  |
| UTI89/AS             | 2262543           | ns                | rec    | UTI89_C2324 | wcal      | CDS  |
| UTI89/AS             | 2262665           | s                 | rec    | UTI89_C2324 | wcal      | CDS  |
| UTI89/AS             | 2262671           | s                 | rec    | UTI89_C2324 | wcal      | CDS  |
| UTI89/AS             | 2262680           | s                 | rec    | UTI89_C2324 | wcal      | CDS  |
| UTI89/AS             | 2262689           | s                 | rec    | UTI89_C2324 | wcal      | CDS  |
| UTI89/AS             | 2212206           | s                 | rec    | UTI89_C2324 | wcal      | CDS  |
| S88                  | 2122220           | s                 | rec    | UTI89_C2324 | wcal      | CDS  |
| S88                  | 2122319           | s                 | rec    | UTI89_C2324 | wcal      | CDS  |
| S88                  | 2122373           | s                 | rec    | UTI89_C2324 | wcal      | CDS  |
| UTI89/AS             | 2212461           | s                 | rec    | UTI89_C2324 | wcal      | CDS  |
| APEC                 | 2212487           | ns                | rec    | UTI89_C2324 | wcal      | CDS  |
| UTI89/AS             | 2212499           | s                 | rec    | UTI89_C2324 | wcal      | CDS  |
| UTI89/AS             | 2212503           | s                 | rec    | UTI89_C2324 | wcal      | CDS  |
| UTI89/AS             | 2212506           | s                 | rec    | UTI89_C2324 | wcal      | CDS  |
| APEC                 | 2212536           | s                 | rec    | UTI89_C2324 | wcal      | CDS  |
| UTI89/AS             | 2263046           | s                 | rec    | UTI89_C2324 | wcal      | CDS  |
| S88                  | 2122490           | s                 | rec    | UTI89_C2324 | wcal      | CDS  |
| UTI89/AS             | 2263089           | ns                | rec    | UTI89_C2324 | wcal      | CDS  |
| UTI89/AS             | 2212611           | s                 | rec    | UTI89_C2324 | wcal      | CDS  |
| S88                  | 2122538           | s                 | rec    | UTI89_C2324 | wcal      | CDS  |
| S88                  | 2122544           | s                 | rec    | UTI89_C2324 | wcal      | CDS  |
| APEC                 | 2212653           | s                 | rec    | UTI89_C2324 | wcal      | CDS  |
| UTI89/AS             | 2212671           | s                 | rec    | UTI89_C2324 | wcal      | CDS  |
| APEC                 | 2212680           | s                 | rec    | UTI89_C2324 | wcal      | CDS  |
| S88                  | 2122601           | s                 | rec    | UTI89_C2324 | wcal      | CDS  |
| APEC                 | 2212734           | s                 | rec    | UTI89_C2324 | wcal      | CDS  |
| S88                  | 2122785           | s                 | rec    | UTI89_C2325 | wcaH      | CDS  |
| S88                  | 2122786           | s                 | rec    | UTI89_C2325 | wcaH      | CDS  |
| S88                  | 2122823           | ns                | rec    | UTI89_C2325 | wcaH      | CDS  |
| UTI89/AS             | 2212922           | s                 | rec    | UTI89_C2325 | wcaH      | CDS  |
| UTI89/AS             | 2212925           | ns                | rec    | UTI89_C2325 | wcaH      | CDS  |
| UTI89/AS             | 2263468           | s                 | rec    | UTI89_C2325 | wcaH      | CDS  |

| lineage <sup>a</sup> | site <sup>b</sup> | mutation          |        | gene        | Gene name | Type |
|----------------------|-------------------|-------------------|--------|-------------|-----------|------|
|                      |                   | type <sup>c</sup> | recomb |             |           |      |
| UTI89/AS             | 2263476           | ns                | rec    | UTI89_C2325 | wcaH      | CDS  |
| UTI89/AS             | 2212985           | s                 | rec    | UTI89_C2325 | wcaH      | CDS  |
| S88                  | 2123140           | s                 | rec    | UTI89_C2325 | wcaH      | CDS  |
| S88                  | 2123148           | ns                | rec    | UTI89_C2325 | wcaH      | CDS  |
| UTI89/AS             | 2263776           | s                 | rec    | UTI89_C2326 | wcaG      | CDS  |
| S88                  | 2123328           | s                 | rec    | UTI89_C2326 | wcaG      | CDS  |
| S88                  | 2123442           | s                 | rec    | UTI89_C2326 | wcaG      | CDS  |
| APEC                 | 2213548           | s                 | rec    | UTI89_C2326 | wcaG      | CDS  |
| S88                  | 2123481           | s                 | rec    | UTI89_C2326 | wcaG      | CDS  |
| S88                  | 2123520           | s                 | rec    | UTI89_C2326 | wcaG      | CDS  |
| S88                  | 2123526           | s                 | rec    | UTI89_C2326 | wcaG      | CDS  |
| S88                  | 2123550           | s                 | rec    | UTI89_C2326 | wcaG      | CDS  |
| UTI89/AS             | 2213647           | s                 | rec    | UTI89_C2326 | wcaG      | CDS  |
| UTI89/AS             | 2264187           | s                 | rec    | UTI89_C2326 | wcaG      | CDS  |
| UTI89/AS             | 2264196           | s                 | rec    | UTI89_C2326 | wcaG      | CDS  |
| UTI89/AS             | 2264199           | s                 | rec    | UTI89_C2326 | wcaG      | CDS  |
| UTI89/AS             | 2213731           | s                 | rec    | UTI89_C2326 | wcaG      | CDS  |
| UTI89/AS             | 2213734           | s                 | rec    | UTI89_C2326 | wcaG      | CDS  |
| APEC                 | 2213755           | s                 | rec    | UTI89_C2326 | wcaG      | CDS  |
| APEC                 | 2213824           | s                 | rec    | UTI89_C2326 | wcaG      | CDS  |
| S88                  | 2123745           | s                 | rec    | UTI89_C2326 | wcaG      | CDS  |
| APEC                 | 2213839           | s                 | rec    | UTI89_C2326 | wcaG      | CDS  |
| APEC                 | 2213854           | s                 | rec    | UTI89_C2326 | wcaG      | CDS  |
| UTI89/AS             | 2213863           | s                 | rec    | UTI89_C2326 | wcaG      | CDS  |
| UTI89/AS             | 2264360           | s                 | rec    | UTI89_C2326 | wcaG      | CDS  |
| S88                  | 2123784           | s                 | rec    | UTI89_C2326 | wcaG      | CDS  |
| S88                  | 2123910           | s                 | rec    | UTI89_C2326 | wcaG      | CDS  |
| APEC                 | 2214013           | s                 | rec    | UTI89_C2326 | wcaG      | CDS  |
| APEC                 | 2214097           | s                 | rec    | UTI89_C2326 | wcaG      | CDS  |
| APEC                 | 2214121           | s                 | rec    | UTI89_C2326 | wcaG      | CDS  |
| APEC                 | 2214124           | s                 | rec    | UTI89_C2326 | wcaG      | CDS  |
| APEC                 | 2214145           | s                 | rec    | UTI89_C2326 | wcaG      | CDS  |
| APEC                 | 2214148           | s                 | rec    | UTI89_C2326 | wcaG      | CDS  |
| UTI89/AS             | 2264652           | s                 | rec    | UTI89_C2326 | wcaG      | CDS  |
| S88                  | 2124102           | s                 | rec    | UTI89_C2326 | wcaG      | CDS  |
| S88                  | 2124129           | s                 | rec    | UTI89_C2326 | wcaG      | CDS  |
| APEC                 | 2214227           | ns                | rec    | UTI89_C2326 | wcaG      | CDS  |
| APEC                 | 2214402           | s                 | rec    | UTI89_C2327 | gmd       | CDS  |
| APEC                 | 2214408           | s                 | rec    | UTI89_C2327 | gmd       | CDS  |
| S88                  | 2124332           | s                 | rec    | UTI89_C2327 | gmd       | CDS  |
| APEC                 | 2214417           | s                 | rec    | UTI89_C2327 | gmd       | CDS  |
| APEC                 | 2214429           | s                 | rec    | UTI89_C2327 | gmd       | CDS  |

| lineage <sup>a</sup> | site <sup>b</sup> | mutation          |        | gene        | Gene name | Type |
|----------------------|-------------------|-------------------|--------|-------------|-----------|------|
|                      |                   | type <sup>c</sup> | recomb |             |           |      |
| APEC                 | 2214471           | s                 | rec    | UTI89_C2327 | gmd       | CDS  |
| APEC                 | 2214474           | s                 | rec    | UTI89_C2327 | gmd       | CDS  |
| APEC                 | 2214477           | s                 | rec    | UTI89_C2327 | gmd       | CDS  |
| UTI89/AS             | 2264978           | s                 | rec    | UTI89_C2327 | gmd       | CDS  |
| S88                  | 2124437           | s                 | rec    | UTI89_C2327 | gmd       | CDS  |
| S88                  | 2124476           | s                 | rec    | UTI89_C2327 | gmd       | CDS  |
| APEC                 | 2214582           | s                 | rec    | UTI89_C2327 | gmd       | CDS  |
| S88                  | 2124521           | s                 | rec    | UTI89_C2327 | gmd       | CDS  |
| S88                  | 2124524           | s                 | rec    | UTI89_C2327 | gmd       | CDS  |
| S88                  | 2124539           | s                 | rec    | UTI89_C2327 | gmd       | CDS  |
| APEC                 | 2214624           | s                 | rec    | UTI89_C2327 | gmd       | CDS  |
| APEC                 | 2214672           | s                 | rec    | UTI89_C2327 | gmd       | CDS  |
| UTI89/AS             | 2265184           | s                 | rec    | UTI89_C2327 | gmd       | CDS  |
| APEC                 | 2214708           | s                 | rec    | UTI89_C2327 | gmd       | CDS  |
| APEC                 | 2214720           | s                 | rec    | UTI89_C2327 | gmd       | CDS  |
| APEC                 | 2214738           | s                 | rec    | UTI89_C2327 | gmd       | CDS  |
| UTI89/AS             | 2214774           | s                 | rec    | UTI89_C2327 | gmd       | CDS  |
| UTI89/AS             | 2214777           | s                 | rec    | UTI89_C2327 | gmd       | CDS  |
| S88                  | 2124701           | s                 | rec    | UTI89_C2327 | gmd       | CDS  |
| APEC                 | 2214819           | s                 | rec    | UTI89_C2327 | gmd       | CDS  |
| S88                  | 2124815           | s                 | rec    | UTI89_C2327 | gmd       | CDS  |
| S88                  | 2124818           | s                 | rec    | UTI89_C2327 | gmd       | CDS  |
| APEC                 | 2214948           | s                 | rec    | UTI89_C2327 | gmd       | CDS  |
| S88                  | 2124896           | s                 | rec    | UTI89_C2327 | gmd       | CDS  |
| S88                  | 2124959           | s                 | rec    | UTI89_C2327 | gmd       | CDS  |
| APEC                 | 2215044           | s                 | rec    | UTI89_C2327 | gmd       | CDS  |
| UTI89/AS             | 2215050           | s                 | rec    | UTI89_C2327 | gmd       | CDS  |
| S88                  | 2124995           | s                 | rec    | UTI89_C2327 | gmd       | CDS  |
| APEC                 | 2215098           | s                 | rec    | UTI89_C2327 | gmd       | CDS  |
| APEC                 | 2215125           | s                 | rec    | UTI89_C2327 | gmd       | CDS  |
| APEC                 | 2215167           | s                 | rec    | UTI89_C2327 | gmd       | CDS  |
| UTI89/AS             | 2265689           | s                 | rec    | UTI89_C2327 | gmd       | CDS  |
| S88                  | 2125172           | s                 | rec    | UTI89_C2327 | gmd       | CDS  |
| UTI89/AS             | 2215405           | ns                | rec    | UTI89_C2328 | wcaF      | CDS  |
| UTI89/AS             | 2265919           | s                 | rec    | UTI89_C2328 | wcaF      | CDS  |
| S88                  | 2125393           | s                 | rec    | UTI89_C2328 | wcaF      | CDS  |
| APEC                 | 2215495           | ns                | rec    | UTI89_C2328 | wcaF      | CDS  |
| S88                  | 2125417           | s                 | rec    | UTI89_C2328 | wcaF      | CDS  |
| S88                  | 2125441           | s                 | rec    | UTI89_C2328 | wcaF      | CDS  |
| S88                  | 2125447           | s                 | rec    | UTI89_C2328 | wcaF      | CDS  |
| S88                  | 2125450           | s                 | rec    | UTI89_C2328 | wcaF      | CDS  |

| lineage <sup>a</sup> | site <sup>b</sup> | mutation          |        | gene        | Gene name | Type |
|----------------------|-------------------|-------------------|--------|-------------|-----------|------|
|                      |                   | type <sup>c</sup> | recomb |             |           |      |
| UTI89/AS             | 2266056           | ns                | rec    | UTI89_C2328 | wcaF      | CDS  |
| UTI89/AS             | 2215607           | s                 | rec    | UTI89_C2328 | wcaF      | CDS  |
| APEC                 | 2215685           | ns                | rec    | UTI89_C2328 | wcaF      | CDS  |
| UTI89/AS             | 2266210           | s                 | rec    | UTI89_C2328 | wcaF      | CDS  |
| APEC                 | 2215757           | s                 | rec    | UTI89_C2328 | wcaF      | CDS  |
| UTI89/AS             | 2266537           | s                 | rec    | UTI89_C2329 | wcaE      | CDS  |
| UTI89/AS             | 2216093           | s                 | rec    | UTI89_C2329 | wcaE      | CDS  |
| UTI89/AS             | 2216153           | s                 | rec    | UTI89_C2329 | wcaE      | CDS  |
| UTI89/AS             | 2216183           | s                 | rec    | UTI89_C2329 | wcaE      | CDS  |
| UTI89/AS             | 2216189           | s                 | rec    | UTI89_C2329 | wcaE      | CDS  |
| UTI89/AS             | 2266696           | s                 | rec    | UTI89_C2329 | wcaE      | CDS  |
| UTI89/AS             | 2266783           | s                 | rec    | UTI89_C2329 | wcaE      | CDS  |
| UTI89/AS             | 2216453           | s                 | rec    | UTI89_C2329 | wcaE      | CDS  |
| UTI89/AS             | 2216459           | ns                | rec    | UTI89_C2329 | wcaE      | CDS  |
| UTI89/AS             | 2216460           | ns                | rec    | UTI89_C2329 | wcaE      | CDS  |
| UTI89/AS             | 2216465           | s                 | rec    | UTI89_C2329 | wcaE      | CDS  |
| UTI89/AS             | 2216468           | s                 | rec    | UTI89_C2329 | wcaE      | CDS  |
| UTI89/AS             | 2267013           | s                 | rec    | UTI89_C2329 | wcaE      | CDS  |
| UTI89/AS             | 2267016           | ns                | rec    | UTI89_C2329 | wcaE      | CDS  |
| UTI89/AS             | 2216531           | ns                | rec    | UTI89_C2329 | wcaE      | CDS  |
| UTI89/AS             | 2216546           | s                 | rec    | UTI89_C2329 | wcaE      | CDS  |
| UTI89/AS             | 2216564           | s                 | rec    | UTI89_C2329 | wcaE      | CDS  |
| UTI89/AS             | 2267074           | s                 | rec    | UTI89_C2329 | wcaE      | CDS  |
| UTI89/AS             | 2267146           | s                 | rec    | UTI89_C2329 | wcaE      | CDS  |
| UTI89/AS             | 2267222           | nc                | rec    | intergenic  |           |      |
| UTI89/AS             | 2267253           | nc                | rec    | intergenic  |           |      |
| UTI89/AS             | 2267313           | s                 | rec    | UTI89_C2330 | wcaD      | CDS  |
| UTI89/AS             | 2267328           | s                 | rec    | UTI89_C2330 | wcaD      | CDS  |
| UTI89/AS             | 2267448           | s                 | rec    | UTI89_C2330 | wcaD      | CDS  |
| UTI89/AS             | 2216968           | s                 | rec    | UTI89_C2330 | wcaD      | CDS  |
| UTI89/AS             | 2267475           | s                 | rec    | UTI89_C2330 | wcaD      | CDS  |
| UTI89/AS             | 2267613           | s                 | rec    | UTI89_C2330 | wcaD      | CDS  |
| UTI89/AS             | 2217163           | s                 | rec    | UTI89_C2330 | wcaD      | CDS  |
| UTI89/AS             | 2267709           | s                 | rec    | UTI89_C2330 | wcaD      | CDS  |
| UTI89/AS             | 2267712           | s                 | rec    | UTI89_C2330 | wcaD      | CDS  |
| UTI89/AS             | 2217220           | s                 | rec    | UTI89_C2330 | wcaD      | CDS  |
| UTI89/AS             | 2267823           | s                 | rec    | UTI89_C2330 | wcaD      | CDS  |
| UTI89/AS             | 2267850           | s                 | rec    | UTI89_C2330 | wcaD      | CDS  |
| UTI89/AS             | 2267853           | s                 | rec    | UTI89_C2330 | wcaD      | CDS  |
| UTI89/AS             | 2267889           | s                 | rec    | UTI89_C2330 | wcaD      | CDS  |
| UTI89/AS             | 2268069           | s                 | rec    | UTI89_C2330 | wcaD      | CDS  |

| lineage <sup>a</sup> | site <sup>b</sup> | mutation          |        | gene        | Gene name | Type |
|----------------------|-------------------|-------------------|--------|-------------|-----------|------|
|                      |                   | type <sup>c</sup> | recomb |             |           |      |
| UTI89/AS             | 2268112           | ns                | rec    | UTI89_C2330 | wcaD      | CDS  |
| UTI89/AS             | 2217646           | s                 | rec    | UTI89_C2330 | wcaD      | CDS  |
| UTI89/AS             | 2217663           | ns                | rec    | UTI89_C2330 | wcaD      | CDS  |
| UTI89/AS             | 2217682           | s                 | rec    | UTI89_C2330 | wcaD      | CDS  |
| UTI89/AS             | 2217691           | s                 | rec    | UTI89_C2330 | wcaD      | CDS  |
| UTI89/AS             | 2217736           | s                 | rec    | UTI89_C2330 | wcaD      | CDS  |
| UTI89/AS             | 2268285           | s                 | rec    | UTI89_C2330 | wcaD      | CDS  |
| UTI89/AS             | 2217853           | s                 | rec    | UTI89_C2330 | wcaD      | CDS  |
| UTI89/AS             | 2268372           | s                 | rec    | UTI89_C2330 | wcaD      | CDS  |
| UTI89/AS             | 2268868           | s                 | rec    | UTI89_C2331 | wcaC      | CDS  |
| UTI89/AS             | 2268895           | s                 | rec    | UTI89_C2331 | wcaC      | CDS  |
| UTI89/AS             | 2268964           | ns                | rec    | UTI89_C2331 | wcaC      | CDS  |
| UTI89/AS             | 2218470           | ns                | rec    | UTI89_C2331 | wcaC      | CDS  |
| UTI89/AS             | 2218529           | s                 | rec    | UTI89_C2331 | wcaC      | CDS  |
| UTI89/AS             | 2218532           | s                 | rec    | UTI89_C2331 | wcaC      | CDS  |
| UTI89/AS             | 2269054           | s                 | rec    | UTI89_C2331 | wcaC      | CDS  |
| UTI89/AS             | 2218580           | s                 | rec    | UTI89_C2331 | wcaC      | CDS  |
| UTI89/AS             | 2218583           | s                 | rec    | UTI89_C2331 | wcaC      | CDS  |
| UTI89/AS             | 2218646           | s                 | rec    | UTI89_C2331 | wcaC      | CDS  |
| UTI89/AS             | 2218697           | s                 | rec    | UTI89_C2331 | wcaC      | CDS  |
| UTI89/AS             | 2269222           | s                 | rec    | UTI89_C2331 | wcaC      | CDS  |
| UTI89/AS             | 2269270           | s                 | rec    | UTI89_C2331 | wcaC      | CDS  |
| UTI89/AS             | 2218793           | s                 | rec    | UTI89_C2331 | wcaC      | CDS  |
| UTI89/AS             | 2269306           | s                 | rec    | UTI89_C2331 | wcaC      | CDS  |
| UTI89/AS             | 2269360           | s                 | rec    | UTI89_C2331 | wcaC      | CDS  |
| UTI89/AS             | 2269362           | s                 | rec    | UTI89_C2331 | wcaC      | CDS  |
| UTI89/AS             | 2269666           | s                 | rec    | UTI89_C2331 | wcaC      | CDS  |
| UTI89/AS             | 2219335           | s                 | rec    | UTI89_C2332 | wcaB      | CDS  |
| UTI89/AS             | 2269959           | s                 | rec    | UTI89_C2332 | wcaB      | CDS  |
| UTI89/AS             | 2269962           | s                 | rec    | UTI89_C2332 | wcaB      | CDS  |
| UTI89/AS             | 2269965           | s                 | rec    | UTI89_C2332 | wcaB      | CDS  |
| UTI89/AS             | 2269971           | s                 | rec    | UTI89_C2332 | wcaB      | CDS  |
| UTI89/AS             | 2270101           | ns                | rec    | UTI89_C2332 | wcaB      | CDS  |
| UTI89/AS             | 2270130           | s                 | rec    | UTI89_C2332 | wcaB      | CDS  |
| UTI89/AS             | 2270249           | s                 | rec    | UTI89_C2333 | wcaA      | CDS  |
| UTI89/AS             | 2270294           | s                 | rec    | UTI89_C2333 | wcaA      | CDS  |
| UTI89/AS             | 2270357           | ns                | rec    | UTI89_C2333 | wcaA      | CDS  |
| UTI89/AS             | 2219864           | ns                | rec    | UTI89_C2333 | wcaA      | CDS  |
| UTI89/AS             | 2270381           | s                 | rec    | UTI89_C2333 | wcaA      | CDS  |
| UTI89/AS             | 2219937           | s                 | rec    | UTI89_C2333 | wcaA      | CDS  |
| UTI89/AS             | 2270435           | s                 | rec    | UTI89_C2333 | wcaA      | CDS  |

| lineage <sup>a</sup> | site <sup>b</sup> | mutation          |        | gene        | Gene name | Type |
|----------------------|-------------------|-------------------|--------|-------------|-----------|------|
|                      |                   | type <sup>c</sup> | recomb |             |           |      |
| UTI89/AS             | 2270477           | s                 | rec    | UTI89_C2333 | wcaA      | CDS  |
| UTI89/AS             | 2220024           | s                 | rec    | UTI89_C2333 | wcaA      | CDS  |
| UTI89/AS             | 2220036           | s                 | rec    | UTI89_C2333 | wcaA      | CDS  |
| UTI89/AS             | 2270603           | s                 | rec    | UTI89_C2333 | wcaA      | CDS  |
| UTI89/AS             | 2270615           | s                 | rec    | UTI89_C2333 | wcaA      | CDS  |
| UTI89/AS             | 2270666           | s                 | rec    | UTI89_C2333 | wcaA      | CDS  |
| UTI89/AS             | 2270705           | s                 | rec    | UTI89_C2333 | wcaA      | CDS  |
| UTI89/AS             | 2270714           | s                 | rec    | UTI89_C2333 | wcaA      | CDS  |
| UTI89/AS             | 2270747           | s                 | rec    | UTI89_C2333 | wcaA      | CDS  |
| UTI89/AS             | 2270828           | s                 | rec    | UTI89_C2333 | wcaA      | CDS  |
| UTI89/AS             | 2271244           | s                 | rec    | UTI89_C2334 | -         | CDS  |
| UTI89/AS             | 2271394           | s                 | rec    | UTI89_C2334 | -         | CDS  |
| UTI89/AS             | 2271466           | s                 | rec    | UTI89_C2334 | -         | CDS  |
| UTI89/AS             | 2220992           | s                 | rec    | UTI89_C2334 | -         | CDS  |
| UTI89/AS             | 2271502           | s                 | rec    | UTI89_C2334 | -         | CDS  |
| UTI89/AS             | 2221051           | s                 | rec    | UTI89_C2334 | -         | CDS  |
| UTI89/AS             | 2221090           | s                 | rec    | UTI89_C2334 | -         | CDS  |
| UTI89/AS             | 2271595           | s                 | rec    | UTI89_C2334 | -         | CDS  |
| UTI89/AS             | 2271598           | s                 | rec    | UTI89_C2334 | -         | CDS  |
| UTI89/AS             | 2221151           | s                 | rec    | UTI89_C2334 | -         | CDS  |
| UTI89/AS             | 2221172           | s                 | rec    | UTI89_C2334 | -         | CDS  |
| UTI89/AS             | 2272156           | s                 | rec    | UTI89_C2334 | -         | CDS  |
| UTI89/AS             | 2272225           | s                 | rec    | UTI89_C2334 | -         | CDS  |
| UTI89/AS             | 2221826           | s                 | rec    | UTI89_C2334 | -         | CDS  |
| UTI89/AS             | 2221850           | s                 | rec    | UTI89_C2334 | -         | CDS  |
| UTI89/AS             | 2221853           | s                 | rec    | UTI89_C2334 | -         | CDS  |
| UTI89/AS             | 2221939           | s                 | rec    | UTI89_C2334 | -         | CDS  |
| UTI89/AS             | 2221943           | s                 | rec    | UTI89_C2334 | -         | CDS  |
| UTI89/AS             | 2272460           | ns                | rec    | UTI89_C2334 | -         | CDS  |
| UTI89/AS             | 2221997           | s                 | rec    | UTI89_C2334 | -         | CDS  |
| UTI89/AS             | 2222021           | s                 | rec    | UTI89_C2334 | -         | CDS  |
| UTI89/AS             | 2272588           | s                 | rec    | UTI89_C2334 | -         | CDS  |
| UTI89/AS             | 2222171           | s                 | rec    | UTI89_C2334 | -         | CDS  |
| UTI89/AS             | 2222224           | ns                | rec    | UTI89_C2334 | -         | CDS  |
| UTI89/AS             | 2272731           | ns                | rec    | UTI89_C2334 | -         | CDS  |
| UTI89/AS             | 2272801           | s                 | rec    | UTI89_C2334 | -         | CDS  |
| UTI89/AS             | 2222318           | s                 | rec    | UTI89_C2334 | -         | CDS  |
| UTI89/AS             | 2222330           | ns                | rec    | UTI89_C2334 | -         | CDS  |
| UTI89/AS             | 2222332           | ns                | rec    | UTI89_C2334 | -         | CDS  |
| UTI89/AS             | 2272873           | s                 | rec    | UTI89_C2334 | -         | CDS  |
| UTI89/AS             | 2222414           | s                 | rec    | UTI89_C2334 | -         | CDS  |

| lineage <sup>a</sup> | site <sup>b</sup> | mutation          |        | gene        | Gene name | Type |
|----------------------|-------------------|-------------------|--------|-------------|-----------|------|
|                      |                   | type <sup>c</sup> | recomb |             |           |      |
| UTI89/AS             | 2222471           | s                 | rec    | UTI89_C2334 | -         | CDS  |
| UTI89/AS             | 2272978           | s                 | rec    | UTI89_C2334 | -         | CDS  |
| UTI89/AS             | 2273011           | s                 | rec    | UTI89_C2334 | -         | CDS  |
| UTI89/AS             | 2222552           | s                 | rec    | UTI89_C2334 | -         | CDS  |
| UTI89/AS             | 2273071           | s                 | rec    | UTI89_C2334 | -         | CDS  |
| UTI89/AS             | 2273074           | s                 | rec    | UTI89_C2334 | -         | CDS  |
| UTI89/AS             | 2273077           | s                 | rec    | UTI89_C2334 | -         | CDS  |
| UTI89/AS             | 2222607           | ns                | rec    | UTI89_C2334 | -         | CDS  |
| UTI89/AS             | 2273131           | s                 | rec    | UTI89_C2334 | -         | CDS  |
| UTI89/AS             | 2273149           | s                 | rec    | UTI89_C2334 | -         | CDS  |
| UTI89/AS             | 2273179           | s                 | rec    | UTI89_C2334 | -         | CDS  |
| UTI89/AS             | 2222705           | s                 | rec    | UTI89_C2334 | -         | CDS  |
| UTI89/AS             | 2273373           | s                 | rec    | UTI89_C2335 | wzb       | CDS  |
| UTI89/AS             | 2222968           | s                 | rec    | UTI89_C2335 | wzb       | CDS  |
| UTI89/AS             | 2223001           | ns                | rec    | UTI89_C2335 | wzb       | CDS  |
| UTI89/AS             | 2273535           | ns                | rec    | UTI89_C2335 | wzb       | CDS  |
| UTI89/AS             | 2273537           | ns                | rec    | UTI89_C2335 | wzb       | CDS  |
| UTI89/AS             | 2273550           | s                 | rec    | UTI89_C2335 | wzb       | CDS  |
| UTI89/AS             | 2273553           | s                 | rec    | UTI89_C2335 | wzb       | CDS  |
| UTI89/AS             | 2223109           | s                 | rec    | UTI89_C2335 | wzb       | CDS  |
| UTI89/AS             | 2223115           | s                 | rec    | UTI89_C2335 | wzb       | CDS  |
| UTI89/AS             | 2273616           | s                 | rec    | UTI89_C2335 | wzb       | CDS  |
| UTI89/AS             | 2273619           | s                 | rec    | UTI89_C2335 | wzb       | CDS  |
| UTI89/AS             | 2223208           | s                 | rec    | UTI89_C2335 | wzb       | CDS  |
| UTI89/AS             | 2273852           | s                 | rec    | UTI89_C2336 | wza       | CDS  |
| UTI89/AS             | 2223465           | s                 | rec    | UTI89_C2336 | wza       | CDS  |
| UTI89/AS             | 2223648           | s                 | rec    | UTI89_C2336 | wza       | CDS  |
| UTI89/AS             | 2274227           | s                 | rec    | UTI89_C2336 | wza       | CDS  |
| UTI89/AS             | 2274254           | s                 | rec    | UTI89_C2336 | wza       | CDS  |
| UTI89/AS             | 2223783           | s                 | rec    | UTI89_C2336 | wza       | CDS  |
| UTI89/AS             | 2223795           | s                 | rec    | UTI89_C2336 | wza       | CDS  |
| UTI89/AS             | 2223837           | s                 | rec    | UTI89_C2336 | wza       | CDS  |
| UTI89/AS             | 2223849           | s                 | rec    | UTI89_C2336 | wza       | CDS  |
| UTI89/AS             | 2223867           | s                 | rec    | UTI89_C2336 | wza       | CDS  |
| UTI89/AS             | 2223882           | s                 | rec    | UTI89_C2336 | wza       | CDS  |
| UTI89/AS             | 2223888           | s                 | rec    | UTI89_C2336 | wza       | CDS  |
| UTI89/AS             | 2274509           | s                 | rec    | UTI89_C2336 | wza       | CDS  |
| UTI89/AS             | 2274518           | s                 | rec    | UTI89_C2336 | wza       | CDS  |
| UTI89/AS             | 2224077           | s                 | rec    | UTI89_C2336 | wza       | CDS  |
| UTI89/AS             | 2274689           | s                 | rec    | UTI89_C2336 | wza       | CDS  |
| UTI89/AS             | 2274692           | s                 | rec    | UTI89_C2336 | wza       | CDS  |



| lineage <sup>a</sup> | site <sup>b</sup> | mutation          |        | gene        | Gene name | Type |
|----------------------|-------------------|-------------------|--------|-------------|-----------|------|
|                      |                   | type <sup>c</sup> | recomb |             |           |      |
| UTI89/AS             | 2224235           | s                 | rec    | UTI89_C2336 | wza       | CDS  |
| UTI89/AS             | 2274794           | s                 | rec    | UTI89_C2336 | wza       | CDS  |
| UTI89                | 2275405           | del               | rec    | intergenic  |           |      |
| UTI89/AS             | 2224945           | nc                | rec    | intergenic  |           |      |
| UTI89/AS             | 2275441           | nc                | rec    | intergenic  |           |      |
| UTI89/AS             | 2275727           | s                 | rec    | UTI89_C2337 | -         | CDS  |
| UTI89/AS             | 2225316           | s                 | rec    | UTI89_C2337 | -         | CDS  |
| UTI89/AS             | 2225385           | s                 | rec    | UTI89_C2337 | -         | CDS  |
| UTI89/AS             | 2275903           | s                 | rec    | UTI89_C2337 | -         | CDS  |
| UTI89/AS             | 2275987           | s                 | rec    | UTI89_C2337 | -         | CDS  |
| UTI89/AS             | 2225577           | s                 | rec    | UTI89_C2337 | -         | CDS  |
| UTI89/AS             | 2276266           | s                 | rec    | UTI89_C2337 | -         | CDS  |
| UTI89/AS             | 2276293           | s                 | rec    | UTI89_C2337 | -         | CDS  |
| UTI89/AS             | 2276318           | s                 | rec    | UTI89_C2337 | -         | CDS  |
| UTI89/AS             | 2276320           | s                 | rec    | UTI89_C2337 | -         | CDS  |
| UTI89/AS             | 2276350           | s                 | rec    | UTI89_C2337 | -         | CDS  |
| UTI89/AS             | 2276372           | ns                | rec    | UTI89_C2337 | -         | CDS  |
| UTI89/AS             | 2276382           | ns                | rec    | UTI89_C2337 | -         | CDS  |
| UTI89/AS             | 2276386           | s                 | rec    | UTI89_C2337 | -         | CDS  |
| UTI89/AS             | 2225955           | s                 | rec    | UTI89_C2337 | -         | CDS  |
| UTI89/AS             | 2276548           | s                 | rec    | UTI89_C2337 | -         | CDS  |
| UTI89/AS             | 2276554           | s                 | rec    | UTI89_C2337 | -         | CDS  |
| UTI89/AS             | 2226072           | s                 | rec    | UTI89_C2337 | -         | CDS  |
| UTI89/AS             | 2226075           | s                 | rec    | UTI89_C2337 | -         | CDS  |
| UTI89/AS             | 2226078           | s                 | rec    | UTI89_C2337 | -         | CDS  |
| UTI89/AS             | 2276581           | s                 | rec    | UTI89_C2337 | -         | CDS  |
| AS                   | 2229281           | s                 |        | UTI89_C2341 | dcd       | CDS  |
| AS                   | 2231272           | s                 |        | UTI89_C2343 | yegE      | CDS  |
| AS                   | 2232346           | s                 |        | UTI89_C2343 | yegE      | CDS  |
| AS                   | 2233288           | s                 |        | UTI89_C2343 | yegE      | CDS  |
| AS                   | 2234367           | s                 |        | UTI89_C2344 | alkA      | CDS  |
| AS                   | 2234383           | s                 |        | UTI89_C2344 | alkA      | CDS  |
| AS                   | 2235060           | ns                |        | UTI89_C2344 | alkA      | CDS  |
| AS                   | 2237467           | ns                |        | UTI89_C2346 | yegI      | CDS  |
| AS                   | 2241264           | s                 |        | UTI89_C2349 | yegM      | CDS  |
| UTI89                | 2292182           | ns                |        | UTI89_C2349 | yegM      | CDS  |
| S88                  | 2152753           | s                 |        | UTI89_C2350 | yegN      | CDS  |
| AS                   | 2248047           | ns                |        | UTI89_C2351 | yegO      | CDS  |
| APEC                 | 2249134           | ns                |        | UTI89_C2352 | yegB      | CDS  |
| UTI89                | 2300902           | ns                |        | UTI89_C2353 | baeS      | CDS  |
| APEC                 | 2253699           | del               |        | UTI89_C2357 | -         | CDS  |

| lineage <sup>a</sup> | site <sup>b</sup> | mutation          |        | gene        | Gene name | Type |
|----------------------|-------------------|-------------------|--------|-------------|-----------|------|
|                      |                   | type <sup>c</sup> | recomb |             |           |      |
| AS                   | 2258328           | s                 |        | UTI89_C2360 | yegQ      | CDS  |
| APEC/S88             | 2259241           | nc                | rec    | intergenic  |           |      |
| APEC/S88             | 2259243           | nc                | rec    | intergenic  |           |      |
| APEC/S88             | 2259394           | nc                | rec    | intergenic  |           |      |
| APEC/S88             | 2259609           | nc                | rec    | intergenic  |           |      |
| APEC/S88             | 2259640           | nc                | rec    | intergenic  |           |      |
| APEC/S88             | 2259648           | nc                | rec    | intergenic  |           |      |
| APEC/S88             | 2259649           | nc                | rec    | intergenic  |           |      |
| APEC/S88             | 2169571           | nc                | rec    | intergenic  |           |      |
| APEC/S88             | 2169572           | nc                | rec    | intergenic  |           |      |
| APEC/S88             | 2259711           | nc                | rec    | intergenic  |           |      |
| APEC/S88             | 2169720           | nc                | rec    | intergenic  |           |      |
| APEC/S88             | 2259831           | nc                | rec    | intergenic  |           |      |
| APEC/S88             | 2259834           | nc                | rec    | intergenic  |           |      |
| APEC/S88             | 2259882           | nc                | rec    | intergenic  |           |      |
| APEC/S88             | 2169825           | nc                | rec    | intergenic  |           |      |
| APEC/S88             | 2169837           | nc                | rec    | intergenic  |           |      |
| APEC/S88             | 2259938           | nc                | rec    | intergenic  |           |      |
| APEC/S88             | 2259954           | nc                | rec    | intergenic  |           |      |
| APEC/S88             | 2259969           | nc                | rec    | intergenic  |           |      |
| APEC/S88             | 2169922           | nc                | rec    | intergenic  |           |      |
| APEC/S88             | 2169940           | nc                | rec    | intergenic  |           |      |
| APEC/S88             | 2169945           | nc                | rec    | intergenic  |           |      |
| APEC/S88             | 2169951           | nc                | rec    | intergenic  |           |      |
| APEC/S88             | 2169984           | nc                | rec    | intergenic  |           |      |
| APEC/S88             | 2260104           | nc                | rec    | intergenic  |           |      |
| APEC/S88             | 2260209           | nc                | rec    | intergenic  |           |      |
| APEC/S88             | 2260211           | nc                | rec    | intergenic  |           |      |
| APEC/S88             | 2260254           | nc                | rec    | intergenic  |           |      |
| APEC/S88             | 2170184           | nc                | rec    | intergenic  |           |      |
| APEC/S88             | 2260308           | nc                | rec    | intergenic  |           |      |
| APEC/S88             | 2260314           | nc                | rec    | intergenic  |           |      |
| APEC/S88             | 2260329           | nc                | rec    | intergenic  |           |      |
| APEC/S88             | 2170281           | nc                | rec    | intergenic  |           |      |
| APEC/S88             | 2170310           | nc                | rec    | intergenic  |           |      |
| APEC/S88             | 2170338           | nc                | rec    | intergenic  |           |      |
| APEC/S88             | 2260425           | nc                | rec    | intergenic  |           |      |
| APEC/S88             | 2170386           | nc                | rec    | intergenic  |           |      |
| APEC/S88             | 2170449           | nc                | rec    | intergenic  |           |      |
| APEC/S88             | 2260753           | nc                | rec    | intergenic  |           |      |
| APEC/S88             | 2260809           | nc                | rec    | intergenic  |           |      |
| APEC/S88             | 2260839           | nc                | rec    | intergenic  |           |      |

| lineage <sup>a</sup> | site <sup>b</sup> | mutation          |        | gene | Gene name | Type       |
|----------------------|-------------------|-------------------|--------|------|-----------|------------|
|                      |                   | type <sup>c</sup> | recomb |      |           |            |
| APEC/S88             | 2260886           | nc                | rec    |      |           | intergenic |
| APEC/S88             | 2170883           | nc                | rec    |      |           | intergenic |
| APEC/S88             | 2261078           | nc                | rec    |      |           | intergenic |
| APEC/S88             | 2171006           | nc                | rec    |      |           | intergenic |
| APEC/S88             | 2261111           | nc                | rec    |      |           | intergenic |
| APEC/S88             | 2171045           | nc                | rec    |      |           | intergenic |
| APEC/S88             | 2171069           | nc                | rec    |      |           | intergenic |
| APEC/S88             | 2261153           | nc                | rec    |      |           | intergenic |
| APEC/S88             | 2261162           | nc                | rec    |      |           | intergenic |
| APEC/S88             | 2261165           | nc                | rec    |      |           | intergenic |
| APEC/S88             | 2171099           | nc                | rec    |      |           | intergenic |
| APEC/S88             | 2171100           | nc                | rec    |      |           | intergenic |
| APEC/S88             | 2261215           | nc                | rec    |      |           | intergenic |
| APEC/S88             | 2171422           | nc                | rec    |      |           | intergenic |
| APEC/S88             | 2261611           | nc                | rec    |      |           | intergenic |
| APEC/S88             | 2261614           | nc                | rec    |      |           | intergenic |
| APEC/S88             | 2261620           | nc                | rec    |      |           | intergenic |
| APEC/S88             | 2171560           | nc                | rec    |      |           | intergenic |
| APEC/S88             | 2261744           | nc                | rec    |      |           | intergenic |
| APEC/S88             | 2171665           | nc                | rec    |      |           | intergenic |
| APEC/S88             | 2261755           | nc                | rec    |      |           | intergenic |
| APEC/S88             | 2261761           | nc                | rec    |      |           | intergenic |
| APEC/S88             | 2261774           | nc                | rec    |      |           | intergenic |
| APEC/S88             | 2261845           | nc                | rec    |      |           | intergenic |
| APEC/S88             | 2261881           | nc                | rec    |      |           | intergenic |
| APEC/S88             | 2171857           | nc                | rec    |      |           | intergenic |
| APEC/S88             | 2261953           | nc                | rec    |      |           | intergenic |
| APEC/S88             | 2171974           | nc                | rec    |      |           | intergenic |
| APEC/S88             | 2262058           | nc                | rec    |      |           | intergenic |
| APEC/S88             | 2171989           | nc                | rec    |      |           | intergenic |
| APEC/S88             | 2262106           | nc                | rec    |      |           | intergenic |
| APEC/S88             | 2172030           | nc                | rec    |      |           | intergenic |
| APEC/S88             | 2172031           | nc                | rec    |      |           | intergenic |
| APEC/S88             | 2172032           | nc                | rec    |      |           | intergenic |
| APEC/S88             | 2172056           | nc                | rec    |      |           | intergenic |
| APEC/S88             | 2262142           | nc                | rec    |      |           | intergenic |
| APEC/S88             | 2262148           | nc                | rec    |      |           | intergenic |
| APEC/S88             | 2262155           | nc                | rec    |      |           | intergenic |
| APEC/S88             | 2262337           | nc                | rec    |      |           | intergenic |
| APEC/S88             | 2262340           | nc                | rec    |      |           | intergenic |
| APEC/S88             | 2262349           | nc                | rec    |      |           | intergenic |

| lineage <sup>a</sup> | site <sup>b</sup> | mutation          |        | gene       | Gene name | Type |
|----------------------|-------------------|-------------------|--------|------------|-----------|------|
|                      |                   | type <sup>c</sup> | recomb |            |           |      |
| APEC/S88             | 2172313           | nc                | rec    | intergenic |           |      |
| APEC/S88             | 2262430           | nc                | rec    | intergenic |           |      |
| APEC/S88             | 2262451           | nc                | rec    | intergenic |           |      |
| APEC/S88             | 2172460           | nc                | rec    | intergenic |           |      |
| APEC/S88             | 2172463           | nc                | rec    | intergenic |           |      |
| APEC/S88             | 2172466           | nc                | rec    | intergenic |           |      |
| APEC/S88             | 2172469           | nc                | rec    | intergenic |           |      |
| APEC/S88             | 2172490           | nc                | rec    | intergenic |           |      |
| APEC/S88             | 2262583           | nc                | rec    | intergenic |           |      |
| APEC/S88             | 2262646           | nc                | rec    | intergenic |           |      |
| APEC/S88             | 2262700           | nc                | rec    | intergenic |           |      |
| APEC/S88             | 2172640           | nc                | rec    | intergenic |           |      |
| APEC/S88             | 2262766           | nc                | rec    | intergenic |           |      |
| APEC/S88             | 2172688           | nc                | rec    | intergenic |           |      |
| APEC/S88             | 2262898           | nc                | rec    | intergenic |           |      |
| APEC/S88             | 2172895           | nc                | rec    | intergenic |           |      |
| APEC/S88             | 2262994           | nc                | rec    | intergenic |           |      |
| APEC/S88             | 2172922           | nc                | rec    | intergenic |           |      |
| APEC/S88             | 2172931           | nc                | rec    | intergenic |           |      |
| APEC/S88             | 2263015           | nc                | rec    | intergenic |           |      |
| APEC/S88             | 2172937           | nc                | rec    | intergenic |           |      |
| APEC/S88             | 2172961           | nc                | rec    | intergenic |           |      |
| APEC/S88             | 2172970           | nc                | rec    | intergenic |           |      |
| APEC/S88             | 2172973           | nc                | rec    | intergenic |           |      |
| APEC/S88             | 2263066           | nc                | rec    | intergenic |           |      |
| APEC/S88             | 2263069           | nc                | rec    | intergenic |           |      |
| APEC/S88             | 2263090           | nc                | rec    | intergenic |           |      |
| APEC/S88             | 2173015           | nc                | rec    | intergenic |           |      |
| APEC/S88             | 2263120           | nc                | rec    | intergenic |           |      |
| APEC/S88             | 2173059           | nc                | rec    | intergenic |           |      |
| APEC/S88             | 2263147           | nc                | rec    | intergenic |           |      |
| APEC/S88             | 2173084           | nc                | rec    | intergenic |           |      |
| APEC/S88             | 2173087           | nc                | rec    | intergenic |           |      |
| APEC/S88             | 2263216           | nc                | rec    | intergenic |           |      |
| APEC/S88             | 2263225           | nc                | rec    | intergenic |           |      |
| APEC/S88             | 2263234           | nc                | rec    | intergenic |           |      |
| APEC/S88             | 2173186           | nc                | rec    | intergenic |           |      |
| APEC/S88             | 2173216           | nc                | rec    | intergenic |           |      |
| APEC/S88             | 2173258           | nc                | rec    | intergenic |           |      |
| APEC/S88             | 2263343           | nc                | rec    | intergenic |           |      |
| APEC/S88             | 2173329           | nc                | rec    | intergenic |           |      |

| lineage <sup>a</sup> | site <sup>b</sup> | mutation          |        | gene       | Gene name | Type |
|----------------------|-------------------|-------------------|--------|------------|-----------|------|
|                      |                   | type <sup>c</sup> | recomb |            |           |      |
| APEC/S88             | 2173336           | nc                | rec    | intergenic |           |      |
| APEC/S88             | 2263537           | nc                | rec    | intergenic |           |      |
| APEC/S88             | 2173495           | nc                | rec    | intergenic |           |      |
| APEC/S88             | 2263618           | nc                | rec    | intergenic |           |      |
| APEC/S88             | 2263624           | nc                | rec    | intergenic |           |      |
| APEC/S88             | 2173597           | nc                | rec    | intergenic |           |      |
| APEC/S88             | 2173731           | nc                | rec    | intergenic |           |      |
| APEC/S88             | 2173820           | nc                | rec    | intergenic |           |      |
| APEC/S88             | 2173826           | nc                | rec    | intergenic |           |      |
| APEC/S88             | 2173975           | nc                | rec    | intergenic |           |      |
| APEC/S88             | 2173978           | nc                | rec    | intergenic |           |      |
| APEC/S88             | 2264083           | nc                | rec    | intergenic |           |      |
| APEC/S88             | 2264096           | nc                | rec    | intergenic |           |      |
| APEC/S88             | 2174017           | nc                | rec    | intergenic |           |      |
| APEC/S88             | 2174059           | nc                | rec    | intergenic |           |      |
| APEC/S88             | 2174083           | nc                | rec    | intergenic |           |      |
| APEC/S88             | 2174121           | nc                | rec    | intergenic |           |      |
| APEC/S88             | 2264214           | nc                | rec    | intergenic |           |      |
| APEC/S88             | 2264274           | nc                | rec    | intergenic |           |      |
| APEC/S88             | 2264313           | nc                | rec    | intergenic |           |      |
| APEC/S88             | 2264382           | nc                | rec    | intergenic |           |      |
| APEC/S88             | 2174319           | nc                | rec    | intergenic |           |      |
| APEC/S88             | 2174364           | nc                | rec    | intergenic |           |      |
| APEC/S88             | 2264505           | nc                | rec    | intergenic |           |      |
| APEC/S88             | 2174429           | nc                | rec    | intergenic |           |      |
| APEC/S88             | 2174592           | nc                | rec    | intergenic |           |      |
| APEC/S88             | 2174607           | nc                | rec    | intergenic |           |      |
| APEC/S88             | 2174610           | nc                | rec    | intergenic |           |      |
| APEC/S88             | 2174763           | nc                | rec    | intergenic |           |      |
| APEC/S88             | 2264934           | nc                | rec    | intergenic |           |      |
| APEC/S88             | 2264936           | nc                | rec    | intergenic |           |      |
| APEC/S88             | 2264937           | nc                | rec    | intergenic |           |      |
| APEC/S88             | 2264938           | nc                | rec    | intergenic |           |      |
| APEC/S88             | 2265000           | nc                | rec    | intergenic |           |      |
| APEC/S88             | 2174990           | nc                | rec    | intergenic |           |      |
| APEC/S88             | 2265105           | nc                | rec    | intergenic |           |      |
| APEC/S88             | 2265141           | nc                | rec    | intergenic |           |      |
| APEC/S88             | 2175063           | nc                | rec    | intergenic |           |      |
| APEC/S88             | 2265237           | nc                | rec    | intergenic |           |      |
| APEC/S88             | 2265456           | nc                | rec    | intergenic |           |      |
| APEC/S88             | 2265480           | nc                | rec    | intergenic |           |      |

| lineage <sup>a</sup> | site <sup>b</sup> | mutation          |        | gene       | Gene name | Type |
|----------------------|-------------------|-------------------|--------|------------|-----------|------|
|                      |                   | type <sup>c</sup> | recomb |            |           |      |
| APEC/S88             | 2276650           | nc                | rec    | intergenic |           |      |
| APEC/S88             | 2276686           | nc                | rec    | intergenic |           |      |
| APEC/S88             | 2276725           | nc                | rec    | intergenic |           |      |
| APEC/S88             | 2276733           | nc                | rec    | intergenic |           |      |
| APEC/S88             | 2276740           | nc                | rec    | intergenic |           |      |
| APEC/S88             | 2276764           | nc                | rec    | intergenic |           |      |
| APEC/S88             | 2276767           | nc                | rec    | intergenic |           |      |
| APEC/S88             | 2199827           | nc                | rec    | intergenic |           |      |
| APEC/S88             | 2276816           | nc                | rec    | intergenic |           |      |
| APEC/S88             | 2199870           | nc                | rec    | intergenic |           |      |
| APEC/S88             | 2276825           | nc                | rec    | intergenic |           |      |
| APEC/S88             | 2276841           | nc                | rec    | intergenic |           |      |
| APEC/S88             | 2199893           | nc                | rec    | intergenic |           |      |
| APEC/S88             | 2276857           | nc                | rec    | intergenic |           |      |
| APEC/S88             | 2276920           | nc                | rec    | intergenic |           |      |
| APEC/S88             | 2200007           | nc                | rec    | intergenic |           |      |
| APEC/S88             | 2200009           | nc                | rec    | intergenic |           |      |
| APEC/S88             | 2200079           | nc                | rec    | intergenic |           |      |
| APEC/S88             | 2277037           | nc                | rec    | intergenic |           |      |
| APEC/S88             | 2277088           | nc                | rec    | intergenic |           |      |
| APEC/S88             | 2277130           | nc                | rec    | intergenic |           |      |
| APEC/S88             | 2277133           | nc                | rec    | intergenic |           |      |
| APEC/S88             | 2200202           | nc                | rec    | intergenic |           |      |
| APEC/S88             | 2200226           | nc                | rec    | intergenic |           |      |
| APEC/S88             | 2200238           | nc                | rec    | intergenic |           |      |
| APEC/S88             | 2200250           | nc                | rec    | intergenic |           |      |
| APEC/S88             | 2277211           | nc                | rec    | intergenic |           |      |
| APEC/S88             | 2200271           | nc                | rec    | intergenic |           |      |
| APEC/S88             | 2200292           | nc                | rec    | intergenic |           |      |
| APEC/S88             | 2277253           | nc                | rec    | intergenic |           |      |
| APEC/S88             | 2277256           | nc                | rec    | intergenic |           |      |
| APEC/S88             | 2277277           | nc                | rec    | intergenic |           |      |
| APEC/S88             | 2200424           | nc                | rec    | intergenic |           |      |
| APEC/S88             | 2200448           | nc                | rec    | intergenic |           |      |
| APEC/S88             | 2277409           | nc                | rec    | intergenic |           |      |
| APEC/S88             | 2277412           | nc                | rec    | intergenic |           |      |
| APEC/S88             | 2200466           | nc                | rec    | intergenic |           |      |
| APEC/S88             | 2200475           | nc                | rec    | intergenic |           |      |
| APEC/S88             | 2200478           | nc                | rec    | intergenic |           |      |
| APEC/S88             | 2277430           | nc                | rec    | intergenic |           |      |
| APEC/S88             | 2277439           | nc                | rec    | intergenic |           |      |

| lineage <sup>a</sup> | site <sup>b</sup> | mutation          |        | gene       | Gene name | Type |
|----------------------|-------------------|-------------------|--------|------------|-----------|------|
|                      |                   | type <sup>c</sup> | recomb |            |           |      |
| APEC/S88             | 2200526           | nc                | rec    | intergenic |           |      |
| APEC/S88             | 2200580           | nc                | rec    | intergenic |           |      |
| APEC/S88             | 2200619           | nc                | rec    | intergenic |           |      |
| APEC/S88             | 2277604           | nc                | rec    | intergenic |           |      |
| APEC/S88             | 2200664           | nc                | rec    | intergenic |           |      |
| APEC/S88             | 2277676           | nc                | rec    | intergenic |           |      |
| APEC/S88             | 2277679           | nc                | rec    | intergenic |           |      |
| APEC/S88             | 2277682           | nc                | rec    | intergenic |           |      |
| APEC/S88             | 2277698           | nc                | rec    | intergenic |           |      |
| APEC/S88             | 2200796           | nc                | rec    | intergenic |           |      |
| APEC/S88             | 2277790           | nc                | rec    | intergenic |           |      |
| APEC/S88             | 2277834           | nc                | rec    | intergenic |           |      |
| APEC/S88             | 2277907           | nc                | rec    | intergenic |           |      |
| APEC/S88             | 2277928           | nc                | rec    | intergenic |           |      |
| APEC/S88             | 2277961           | nc                | rec    | intergenic |           |      |
| APEC/S88             | 2201027           | nc                | rec    | intergenic |           |      |
| APEC/S88             | 2278099           | nc                | rec    | intergenic |           |      |
| APEC/S88             | 2201201           | nc                | rec    | intergenic |           |      |
| APEC/S88             | 2201222           | nc                | rec    | intergenic |           |      |
| APEC/S88             | 2278195           | nc                | rec    | intergenic |           |      |
| APEC/S88             | 2278210           | nc                | rec    | intergenic |           |      |
| APEC/S88             | 2201300           | nc                | rec    | intergenic |           |      |
| APEC/S88             | 2201324           | nc                | rec    | intergenic |           |      |
| APEC/S88             | 2278279           | nc                | rec    | intergenic |           |      |
| APEC/S88             | 2278321           | nc                | rec    | intergenic |           |      |
| APEC/S88             | 2201384           | nc                | rec    | intergenic |           |      |
| APEC/S88             | 2201402           | nc                | rec    | intergenic |           |      |
| APEC/S88             | 2201427           | nc                | rec    | intergenic |           |      |
| APEC/S88             | 2201440           | nc                | rec    | intergenic |           |      |
| APEC/S88             | 2201443           | nc                | rec    | intergenic |           |      |
| APEC/S88             | 2278543           | nc                | rec    | intergenic |           |      |
| APEC/S88             | 2201726           | nc                | rec    | intergenic |           |      |
| APEC/S88             | 2278744           | nc                | rec    | intergenic |           |      |
| APEC/S88             | 2201810           | nc                | rec    | intergenic |           |      |
| APEC/S88             | 2278785           | nc                | rec    | intergenic |           |      |
| APEC/S88             | 2201839           | nc                | rec    | intergenic |           |      |
| APEC/S88             | 2278844           | nc                | rec    | intergenic |           |      |
| APEC/S88             | 2201961           | nc                | rec    | intergenic |           |      |
| APEC/S88             | 2278979           | nc                | rec    | intergenic |           |      |
| APEC/S88             | 2202045           | nc                | rec    | intergenic |           |      |
| APEC/S88             | 2279099           | nc                | rec    | intergenic |           |      |

| lineage <sup>a</sup> | site <sup>b</sup> | mutation          |        | gene       | Gene name | Type |
|----------------------|-------------------|-------------------|--------|------------|-----------|------|
|                      |                   | type <sup>c</sup> | recomb |            |           |      |
| APEC/S88             | 2279117           | nc                | rec    | intergenic |           |      |
| APEC/S88             | 2279131           | nc                | rec    | intergenic |           |      |
| APEC/S88             | 2279158           | nc                | rec    | intergenic |           |      |
| APEC/S88             | 2279185           | nc                | rec    | intergenic |           |      |
| APEC/S88             | 2279217           | nc                | rec    | intergenic |           |      |
| APEC/S88             | 2279250           | nc                | rec    | intergenic |           |      |
| APEC/S88             | 2202439           | nc                | rec    | intergenic |           |      |
| APEC/S88             | 2279421           | nc                | rec    | intergenic |           |      |
| APEC/S88             | 2202493           | nc                | rec    | intergenic |           |      |
| APEC/S88             | 2279586           | nc                | rec    | intergenic |           |      |
| APEC/S88             | 2279589           | nc                | rec    | intergenic |           |      |
| APEC/S88             | 2279619           | nc                | rec    | intergenic |           |      |
| APEC/S88             | 2202674           | nc                | rec    | intergenic |           |      |
| APEC/S88             | 2202693           | nc                | rec    | intergenic |           |      |
| APEC/S88             | 2279780           | nc                | rec    | intergenic |           |      |
| APEC/S88             | 2202857           | nc                | rec    | intergenic |           |      |
| APEC/S88             | 2279812           | nc                | rec    | intergenic |           |      |
| APEC/S88             | 2279832           | nc                | rec    | intergenic |           |      |
| APEC/S88             | 2202943           | nc                | rec    | intergenic |           |      |
| APEC/S88             | 2202957           | nc                | rec    | intergenic |           |      |
| APEC/S88             | 2202970           | nc                | rec    | intergenic |           |      |
| APEC/S88             | 2279923           | nc                | rec    | intergenic |           |      |
| APEC/S88             | 2203005           | nc                | rec    | intergenic |           |      |
| APEC/S88             | 2203041           | nc                | rec    | intergenic |           |      |
| APEC/S88             | 2203098           | nc                | rec    | intergenic |           |      |
| APEC/S88             | 2203107           | nc                | rec    | intergenic |           |      |
| APEC/S88             | 2203113           | nc                | rec    | intergenic |           |      |
| APEC/S88             | 2280065           | nc                | rec    | intergenic |           |      |
| APEC/S88             | 2203133           | nc                | rec    | intergenic |           |      |
| APEC/S88             | 2203136           | nc                | rec    | intergenic |           |      |
| APEC/S88             | 2203137           | nc                | rec    | intergenic |           |      |
| APEC/S88             | 2203140           | nc                | rec    | intergenic |           |      |
| APEC/S88             | 2203155           | nc                | rec    | intergenic |           |      |
| APEC/S88             | 2203203           | nc                | rec    | intergenic |           |      |
| APEC/S88             | 2203206           | nc                | rec    | intergenic |           |      |
| APEC/S88             | 2203238           | nc                | rec    | intergenic |           |      |
| APEC/S88             | 2280203           | nc                | rec    | intergenic |           |      |
| APEC/S88             | 2203260           | nc                | rec    | intergenic |           |      |
| APEC/S88             | 2203311           | nc                | rec    | intergenic |           |      |
| APEC/S88             | 2280278           | nc                | rec    | intergenic |           |      |
| APEC/S88             | 2280299           | nc                | rec    | intergenic |           |      |



| lineage <sup>a</sup> | site <sup>b</sup> | mutation          |        | gene        | Gene name | Type |
|----------------------|-------------------|-------------------|--------|-------------|-----------|------|
|                      |                   | type <sup>c</sup> | recomb |             |           |      |
| APEC/S88             | 2280302           | nc                | rec    | intergenic  |           |      |
| APEC/S88             | 2280326           | nc                | rec    | intergenic  |           |      |
| APEC/S88             | 2280353           | nc                | rec    | intergenic  |           |      |
| APEC/S88             | 2280362           | nc                | rec    | intergenic  |           |      |
| APEC/S88             | 2280380           | nc                | rec    | intergenic  |           |      |
| APEC/S88             | 2280382           | nc                | rec    | intergenic  |           |      |
| APEC/S88             | 2203449           | nc                | rec    | intergenic  |           |      |
| APEC/S88             | 2280430           | nc                | rec    | intergenic  |           |      |
| APEC/S88             | 2203514           | nc                | rec    | intergenic  |           |      |
| APEC/S88             | 2280505           | nc                | rec    | intergenic  |           |      |
| APEC/S88             | 2280508           | nc                | rec    | intergenic  |           |      |
| APEC/S88             | 2280514           | nc                | rec    | intergenic  |           |      |
| APEC/S88             | 2280529           | nc                | rec    | intergenic  |           |      |
| APEC/S88             | 2280967           | nc                | rec    | intergenic  |           |      |
| APEC/S88             | 2280974           | nc                | rec    | intergenic  |           |      |
| APEC/S88             | 2204348           | nc                | rec    | intergenic  |           |      |
| APEC/S88             | 2204425           | nc                | rec    | intergenic  |           |      |
| APEC/S88             | 2204435           | nc                | rec    | intergenic  |           |      |
| APEC/S88             | 2204436           | nc                | rec    | intergenic  |           |      |
| APEC/S88             | 2204437           | nc                | rec    | intergenic  |           |      |
| APEC/S88             | 2204520           | nc                | rec    | intergenic  |           |      |
| APEC/S88             | 2204574           | nc                | rec    | intergenic  |           |      |
| APEC/S88             | 2204631           | nc                | rec    | intergenic  |           |      |
| APEC/S88             | 2204646           | nc                | rec    | intergenic  |           |      |
| APEC/S88             | 2204740           | nc                | rec    | intergenic  |           |      |
| APEC/S88             | 2204760           | nc                | rec    | intergenic  |           |      |
| APEC/S88             | 2204769           | nc                | rec    | intergenic  |           |      |
| APEC/S88             | 2281751           | nc                | rec    | intergenic  |           |      |
| APEC/S88             | 2204916           | nc                | rec    | intergenic  |           |      |
| APEC/S88             | 2204940           | nc                | rec    | intergenic  |           |      |
| APEC/S88             | 2204955           | nc                | rec    | intergenic  |           |      |
| APEC/S88             | 2204982           | nc                | rec    | intergenic  |           |      |
| APEC/S88             | 2204985           | nc                | rec    | intergenic  |           |      |
| APEC/S88             | 2205000           | nc                | rec    | intergenic  |           |      |
| APEC/S88             | 2205030           | nc                | rec    | intergenic  |           |      |
| APEC/S88             | 2282064           | indel-4           | rec    | intergenic  |           |      |
| APEC/S88             | 2282084           | nc                | rec    | intergenic  |           |      |
| UTI89                | 2313552           | ns                |        | UTI89_C2364 | gatD      | CDS  |
| S88                  | 2210797           | ns                |        | UTI89_C2365 | gatC      | CDS  |
| S88                  | 2211100           | ns                |        | UTI89_C2366 | gatB      | CDS  |
| UTI89                | 2318549           | s                 |        | UTI89_C2371 | -         | CDS  |
| UTI89                | 2319019           | ns                |        | UTI89_C2371 | -         | CDS  |

| lineage <sup>a</sup> | site <sup>b</sup> | mutation          |        | gene        | Gene name | Type |
|----------------------|-------------------|-------------------|--------|-------------|-----------|------|
|                      |                   | type <sup>c</sup> | recomb |             |           |      |
| AS                   | 2294676           | ns                |        | UTI89_C2374 | yegV      | CDS  |
| S88                  | 2219519           | s                 |        | UTI89_C2376 | yegX      | CDS  |
| UTI89                | 2333054           | nc                |        | intergenic  |           |      |
| AS                   | 2305836           | ins               |        | intergenic  |           |      |
| APEC                 | 2313982           | del               |        | UTI89_C2390 | yehI      | CDS  |
| APEC                 | 2318613           | s                 |        | UTI89_C2392 | yehL      | CDS  |
| AS                   | 2327808           | s                 |        | UTI89_C2398 | yehU      | CDS  |
| UTI89                | 2359972           | ns                |        | UTI89_C2404 | yehZ      | CDS  |
| UTI89                | 2369563           | ns                |        | UTI89_C2412 | yohG      | CDS  |
| S88                  | 2265687           | del               |        | UTI89_C2412 | yohG      | CDS  |
| APEC                 | 2345686           | ns                |        | UTI89_C2415 | yohK      | CDS  |
| APEC                 | 2350819           | s                 |        | UTI89_C2421 | mglC      | CDS  |
| APEC                 | 2352523           | ns                |        | UTI89_C2422 | mglA      | CDS  |
| UTI89                | 2380063           | ns                |        | UTI89_C2422 | mglA      | CDS  |
| APEC                 | 2354555           | nc                |        | intergenic  |           |      |
| S88                  | 2281526           | ns                |        | UTI89_C2428 | yeiG      | CDS  |
| APEC                 | 2360901           | del-11            |        | intergenic  |           |      |
| S88                  | 2284844           | s                 |        | UTI89_C2430 | lysP      | CDS  |
| APEC                 | 2370838           | ns                |        | UTI89_C2439 | yeiN      | CDS  |
| UTI89                | 2403611           | nc                |        | intergenic  |           |      |
| UTI89                | 2408101           | s                 |        | UTI89_C2450 | yeiR      | CDS  |
| APEC                 | 2381848           | ns                |        | UTI89_C2451 | -         | CDS  |
| S88                  | 2323257           | ns                |        | UTI89_C2470 | -         | CDS  |
| UTI89                | 2427990           | s                 |        | UTI89_C2471 | narP      | CDS  |
| UTI89                | 2430345           | s                 |        | UTI89_C2474 | ccmF      | CDS  |
| UTI89                | 2440930           | ns                |        | UTI89_C2489 | eco       | CDS  |
| S88                  | 2340255           | s                 |        | UTI89_C2491 | yojI      | CDS  |
| UTI89                | 2447839           | ns                |        | UTI89_C2495 | apbE      | CDS  |
| UTI89                | 2449542           | nc                |        | intergenic  |           |      |
| APEC                 | 2428027           | ns                |        | UTI89_C2500 | rscC      | CDS  |
| APEC                 | 2431365           | s                 |        | UTI89_C2502 | atoC      | CDS  |
| S88                  | 2355416           | nc                |        | intergenic  |           |      |
| APEC                 | 2435408           | ns                |        | UTI89_C2506 | atoB      | CDS  |
| UTI89                | 2464283           | ns                |        | UTI89_C2507 | yfaP      | CDS  |
| UTI89                | 2465047           | ns                |        | UTI89_C2508 | yfaQ      | CDS  |
| UTI89                | 2472015           | s                 |        | UTI89_C2511 | yfaA      | CDS  |
| APEC                 | 2451215           | ns                |        | UTI89_C2514 | yfaL      | CDS  |
| S88                  | 2375780           | s                 |        | UTI89_C2514 | yfaL      | CDS  |
| UTI89                | 2486813           | ns                |        | UTI89_C2519 | glpQ      | CDS  |
| S88                  | 2391118           | ns                |        | UTI89_C2528 | yfaV      | CDS  |
| APEC                 | 2472077           | s                 |        | UTI89_C2531 | -         | CDS  |

| lineage <sup>a</sup> | site <sup>b</sup> | mutation          |        | gene        | Gene name | Type |
|----------------------|-------------------|-------------------|--------|-------------|-----------|------|
|                      |                   | type <sup>c</sup> | recomb |             |           |      |
| S88                  | 2395235           | ns                |        | UTI89_C2531 | -         | CDS  |
| S88                  | 2397603           | nc                |        | intergenic  |           |      |
| S88                  | 2402784           | ns                |        | UTI89_C2539 | yfbI      | CDS  |
| UTI89                | 2513997           | ns                |        | UTI89_C2548 | menD      | CDS  |
| AS                   | 2492694           | s                 |        | UTI89_C2553 | yfbK      | CDS  |
| S88                  | 2416173           | ns                |        | UTI89_C2553 | yfbK      | CDS  |
| APEC                 | 2495773           | s                 |        | UTI89_C2556 | nuoN      | CDS  |
| APEC                 | 2502370           | s                 |        | UTI89_C2563 | nuoG      | CDS  |
| APEC                 | 2509608           | s                 |        | UTI89_C2568 | nuoA      | CDS  |
| S88                  | 2433122           | del               |        | intergenic  |           |      |
| APEC                 | 2511288           | ns                |        | UTI89_C2570 | lrhA      | CDS  |
| AS                   | 2512146           | nc                |        | intergenic  |           |      |
| UTI89                | 2539472           | nc                |        | intergenic  |           |      |
| S88                  | 2438192           | ns                |        | UTI89_C2574 | yfbS      | CDS  |
| APEC                 | 2516773           | ns                |        | UTI89_C2575 | yfbT      | CDS  |
| APEC                 | 2517332           | s                 |        | UTI89_C2576 | -         | CDS  |
| APEC                 | 2519215           | s                 |        | UTI89_C2579 | -         | CDS  |
| APEC                 | 2530754           | nc                |        | intergenic  |           |      |
| AS                   | 2531096           | ns                |        | UTI89_C2593 | hisJ      | CDS  |
| S88                  | 2454856           | nc                |        | intergenic  |           |      |
| UTI89                | 2560145           | nc                |        | intergenic  |           |      |
| S88                  | 2462373           | ns                |        | UTI89_C2602 | dedA      | CDS  |
| S88                  | 2472491           | ns                |        | UTI89_C2611 | yfcM      | CDS  |
| AS                   | 2550514           | s                 |        | UTI89_C2612 | yfcA      | CDS  |
| UTI89                | 2577950           | ns                |        | UTI89_C2612 | yfcA      | CDS  |
| UTI89                | 2580563           | s                 |        | UTI89_C2615 | prmB      | CDS  |
| APEC                 | 2560499           | s                 |        | UTI89_C2623 | yfcV      | CDS  |
| S88                  | 2485747           | ns                |        | UTI89_C2625 | -         | CDS  |
| UTI89                | 2593016           | nc                |        | intergenic  |           |      |
| AS                   | 2569930           | nc                |        | intergenic  |           |      |
| APEC                 | 2574151           | nc                |        | intergenic  |           |      |
| UTI89/AS             | 2582842           | s                 | rec    | UTI89_C2644 | -         | CDS  |
| UTI89/AS             | 2582844           | s                 | rec    | UTI89_C2644 | -         | CDS  |
| UTI89/AS             | 2582845           | ns                | rec    | UTI89_C2644 | -         | CDS  |
| UTI89/AS             | 2582846           | ns                | rec    | UTI89_C2644 | -         | CDS  |
| UTI89/AS             | 2582848           | s                 | rec    | UTI89_C2644 | -         | CDS  |
| UTI89/AS             | 2582855           | ns                | rec    | UTI89_C2644 | -         | CDS  |
| UTI89/AS             | 2609650           | ns                | rec    | UTI89_C2644 | -         | CDS  |
| UTI89/AS             | 2582955           | ns                | rec    | UTI89_C2644 | -         | CDS  |
| UTI89/AS             | 2609733           | s                 | rec    | UTI89_C2644 | -         | CDS  |
| UTI89/AS             | 2609736           | s                 | rec    | UTI89_C2644 | -         | CDS  |

| lineage <sup>a</sup> | site <sup>b</sup> | mutation          |        | gene        | Gene name | Type |
|----------------------|-------------------|-------------------|--------|-------------|-----------|------|
|                      |                   | type <sup>c</sup> | recomb |             |           |      |
| UTI89/AS             | 2609748           | s                 | rec    | UTI89_C2644 | -         | CDS  |
| UTI89                | 2609921           | ns                |        | UTI89_C2645 | -         | CDS  |
| UTI89/AS             | 2586542           | s                 | rec    | UTI89_C2649 | -         | CDS  |
| UTI89/AS             | 2613373           | s                 | rec    | UTI89_C2649 | -         | CDS  |
| UTI89/AS             | 2613391           | s                 | rec    | UTI89_C2649 | -         | CDS  |
| UTI89/AS             | 2613637           | ns                | rec    | UTI89_C2650 | -         | CDS  |
| UTI89/AS             | 2586885           | s                 | rec    | UTI89_C2650 | -         | CDS  |
| UTI89/AS             | 2586903           | s                 | rec    | UTI89_C2650 | -         | CDS  |
| UTI89/AS             | 2586980           | s                 | rec    | UTI89_C2651 | -         | CDS  |
| UTI89/AS             | 2587010           | s                 | rec    | UTI89_C2651 | -         | CDS  |
| UTI89/AS             | 2613817           | s                 | rec    | UTI89_C2651 | -         | CDS  |
| UTI89/AS             | 2587075           | ns                | rec    | UTI89_C2651 | -         | CDS  |
| UTI89/AS             | 2613850           | s                 | rec    | UTI89_C2651 | -         | CDS  |
| UTI89/AS             | 2613913           | s                 | rec    | UTI89_C2651 | -         | CDS  |
| UTI89/AS             | 2587142           | s                 | rec    | UTI89_C2651 | -         | CDS  |
| UTI89/AS             | 2613922           | s                 | rec    | UTI89_C2651 | -         | CDS  |
| UTI89/AS             | 2613943           | s                 | rec    | UTI89_C2651 | -         | CDS  |
| UTI89/AS             | 2613967           | s                 | rec    | UTI89_C2651 | -         | CDS  |
| UTI89/AS             | 2587598           | s                 | rec    | UTI89_C2651 | -         | CDS  |
| UTI89/AS             | 2587604           | s                 | rec    | UTI89_C2651 | -         | CDS  |
| UTI89/AS             | 2587619           | s                 | rec    | UTI89_C2651 | -         | CDS  |
| UTI89/AS             | 2587658           | s                 | rec    | UTI89_C2651 | -         | CDS  |
| UTI89/AS             | 2587664           | s                 | rec    | UTI89_C2651 | -         | CDS  |
| UTI89/AS             | 2587712           | s                 | rec    | UTI89_C2651 | -         | CDS  |
| UTI89/AS             | 2587721           | s                 | rec    | UTI89_C2651 | -         | CDS  |
| UTI89/AS             | 2587736           | s                 | rec    | UTI89_C2651 | -         | CDS  |
| UTI89/AS             | 2587739           | s                 | rec    | UTI89_C2651 | -         | CDS  |
| UTI89/AS             | 2614578           | ns                | rec    | UTI89_C2651 | -         | CDS  |
| UTI89/AS             | 2587808           | ns                | rec    | UTI89_C2651 | -         | CDS  |
| UTI89/AS             | 2614584           | ns                | rec    | UTI89_C2651 | -         | CDS  |
| UTI89/AS             | 2587826           | s                 | rec    | UTI89_C2651 | -         | CDS  |
| UTI89/AS             | 2587928           | s                 | rec    | UTI89_C2651 | -         | CDS  |
| UTI89/AS             | 2587931           | s                 | rec    | UTI89_C2651 | -         | CDS  |
| UTI89/AS             | 2614708           | s                 | rec    | UTI89_C2651 | -         | CDS  |
| UTI89/AS             | 2614831           | s                 | rec    | UTI89_C2651 | -         | CDS  |
| UTI89/AS             | 2588220           | ns                | rec    | UTI89_C2651 | -         | CDS  |
| UTI89/AS             | 2615011           | nc                | rec    | intergenic  |           |      |
| UTI89                | 2617087           | s                 |        | UTI89_C2653 | -         | CDS  |
| APEC                 | 2595907           | nc                |        | intergenic  |           |      |
| S88                  | 2519752           | ns                |        | UTI89_C2663 | -         | CDS  |
| UTI89/AS             | 2598581           | nc                | rec    | intergenic  |           |      |

| lineage <sup>a</sup> | site <sup>b</sup> | mutation          |        | gene        | Gene name | Type |
|----------------------|-------------------|-------------------|--------|-------------|-----------|------|
|                      |                   | type <sup>c</sup> | recomb |             |           |      |
| UTI89/AS             | 2598583           | nc                | rec    | intergenic  |           |      |
| UTI89/AS             | 2598584           | nc                | rec    | intergenic  |           |      |
| UTI89/AS             | 2598585           | nc                | rec    | intergenic  |           |      |
| UTI89/AS             | 2598586           | nc                | rec    | intergenic  |           |      |
| UTI89/AS             | 2598587           | nc                | rec    | intergenic  |           |      |
| UTI89/AS             | 2625366           | nc                | rec    | intergenic  |           |      |
| UTI89/AS             | 2598602           | nc                | rec    | intergenic  |           |      |
| UTI89/AS             | 2598641           | nc                | rec    | intergenic  |           |      |
| UTI89/AS             | 2598644           | nc                | rec    | intergenic  |           |      |
| UTI89/AS             | 2625440           | nc                | rec    | intergenic  |           |      |
| UTI89/AS             | 2625494           | ns                | rec    | UTI89_C2668 | -         | CDS  |
| UTI89/AS             | 2600125           | ns                | rec    | intergenic  |           |      |
| UTI89/AS             | 2600580           | ns                | rec    | UTI89_C2671 | -         | CDS  |
| UTI89/AS             | 2600581           | s                 | rec    | UTI89_C2671 | -         | CDS  |
| UTI89/AS             | 2626690           | ns                | rec    | UTI89_C2671 | -         | CDS  |
| UTI89/AS             | 2600610           | s                 | rec    | UTI89_C2672 | -         | CDS  |
| UTI89/AS             | 2626744           | s                 | rec    | UTI89_C2672 | -         | CDS  |
| UTI89/AS             | 2626858           | s                 | rec    | UTI89_C2672 | -         | CDS  |
| UTI89/AS             | 2627023           | s                 | rec    | UTI89_C2672 | -         | CDS  |
| UTI89/AS             | 2600931           | s                 | rec    | UTI89_C2672 | -         | CDS  |
| UTI89/AS             | 2600937           | s                 | rec    | UTI89_C2672 | -         | CDS  |
| UTI89/AS             | 2600940           | s                 | rec    | UTI89_C2672 | -         | CDS  |
| UTI89/AS             | 2627065           | s                 | rec    | UTI89_C2672 | -         | CDS  |
| UTI89/AS             | 2627074           | s                 | rec    | UTI89_C2672 | -         | CDS  |
| UTI89/AS             | 2627083           | s                 | rec    | UTI89_C2672 | -         | CDS  |
| UTI89/AS             | 2627104           | s                 | rec    | UTI89_C2672 | -         | CDS  |
| UTI89/AS             | 2601057           | s                 | rec    | UTI89_C2672 | -         | CDS  |
| UTI89/AS             | 2627179           | s                 | rec    | UTI89_C2672 | -         | CDS  |
| UTI89/AS             | 2601117           | s                 | rec    | UTI89_C2672 | -         | CDS  |
| UTI89/AS             | 2601180           | s                 | rec    | UTI89_C2672 | -         | CDS  |
| UTI89/AS             | 2601189           | s                 | rec    | UTI89_C2672 | -         | CDS  |
| UTI89/AS             | 2627467           | s                 | rec    | UTI89_C2672 | -         | CDS  |
| UTI89/AS             | 2627515           | s                 | rec    | UTI89_C2672 | -         | CDS  |
| UTI89/AS             | 2601522           | s                 | rec    | UTI89_C2672 | -         | CDS  |
| UTI89/AS             | 2601525           | s                 | rec    | UTI89_C2672 | -         | CDS  |
| UTI89/AS             | 2627680           | s                 | rec    | UTI89_C2672 | -         | CDS  |
| UTI89/AS             | 2601588           | s                 | rec    | UTI89_C2672 | -         | CDS  |
| UTI89/AS             | 2627695           | s                 | rec    | UTI89_C2672 | -         | CDS  |
| UTI89/AS             | 2601636           | s                 | rec    | UTI89_C2672 | -         | CDS  |
| UTI89/AS             | 2601639           | s                 | rec    | UTI89_C2672 | -         | CDS  |
| UTI89/AS             | 2627830           | s                 | rec    | UTI89_C2672 | -         | CDS  |

| lineage <sup>a</sup> | site <sup>b</sup> | mutation          |        | gene        | Gene name | Type |
|----------------------|-------------------|-------------------|--------|-------------|-----------|------|
|                      |                   | type <sup>c</sup> | recomb |             |           |      |
| UTI89/AS             | 2627862           | ns                | rec    | UTI89_C2672 | -         | CDS  |
| UTI89/AS             | 2601765           | s                 | rec    | UTI89_C2672 | -         | CDS  |
| UTI89/AS             | 2601837           | s                 | rec    | UTI89_C2672 | -         | CDS  |
| UTI89/AS             | 2627938           | s                 | rec    | UTI89_C2672 | -         | CDS  |
| APEC                 | 2603846           | nc                |        | intergenic  |           |      |
| APEC                 | 2604562           | ins               |        | intergenic  |           |      |
| UTI89                | 2630681           | nc                |        | intergenic  |           |      |
| UTI89                | 2630724           | nc                |        | intergenic  |           |      |
| S88                  | 2527762           | ns                |        | UTI89_C2678 | -         | CDS  |
| UTI89                | 2630792           | s                 |        | UTI89_C2678 | -         | CDS  |
| AS                   | 2606211           | s                 |        | UTI89_C2684 | -         | CDS  |
| UTI89/AS             | 2633712           | s                 |        | UTI89_C2684 | -         | CDS  |
| S88                  | 2531387           | del               |        | UTI89_C2689 | hkaH      | CDS  |
| UTI89/AS             | 2636859           | indel             |        | intergenic  |           |      |
| UTI89                | 2637847           | del               |        | intergenic  |           |      |
| UTI89                | 2638205           | s                 |        | UTI89_C2695 | dsdC      | CDS  |
| S88                  | 2540223           | ns                |        | UTI89_C2700 | emrK      | CDS  |
| UTI89                | 2644802           | nc                |        | intergenic  |           |      |
| S88                  | 2544816           | s                 |        | UTI89_C2702 | evgS      | CDS  |
| APEC                 | 2627766           | s                 |        | UTI89_C2707 | yfdX      | CDS  |
| APEC                 | 2641323           | s                 |        | UTI89_C2718 | -         | CDS  |
| UTI89                | 2673574           | s                 |        | UTI89_C2724 | mntH      | CDS  |
| S88                  | 2573088           | s                 |        | UTI89_C2726 | yfeA      | CDS  |
| S88                  | 2578464           | ns                |        | UTI89_C2738 | xapB      | CDS  |
| UTI89                | 2684105           | ns                |        | UTI89_C2739 | xapA      | CDS  |
| UTI89                | 2692136           | nc                |        | intergenic  |           |      |
| UTI89                | 2702909           | s                 |        | UTI89_C2759 | ucpA      | CDS  |
| S88                  | 2617537           | del               |        | UTI89_C2781 | eutM      | CDS  |
| UTI89                | 2722335           | ns                |        | UTI89_C2782 | eutD      | CDS  |
| S88                  | 2619377           | s                 |        | UTI89_C2783 | eutT      | CDS  |
| AS                   | 2699041           | s                 |        | UTI89_C2787 | maeB      | CDS  |
| APEC                 | 2710955           | s                 |        | UTI89_C2796 | acrD      | CDS  |
| UTI89                | 2751430           | s                 |        | UTI89_C2808 | perM      | CDS  |
| AS                   | 2725244           | ns                |        | UTI89_C2810 | yfgC      | CDS  |
| UTI89                | 2753341           | ns                |        | UTI89_C2810 | yfgC      | CDS  |
| APEC                 | 2735178           | ins               |        | UTI89_C2819 | yfgF      | CDS  |
| S88                  | 2658490           | ns                |        | UTI89_C2819 | yfgF      | CDS  |
| APEC                 | 2781967           | ns                |        | UTI89_C2826 | guaB      | CDS  |
| UTI89                | 2775794           | s                 |        | UTI89_C2828 | -         | CDS  |
| APEC                 | 2790238           | ns                |        | UTI89_C2828 | -         | CDS  |
| S88                  | 2675902           | ins               |        | UTI89_C2829 | sinI      | CDS  |

| lineage <sup>a</sup> | site <sup>b</sup> | mutation          |        | gene        | Gene name | Type |
|----------------------|-------------------|-------------------|--------|-------------|-----------|------|
|                      |                   | type <sup>c</sup> | recomb |             |           |      |
| S88                  | 2683288           | s                 |        | UTI89_C2835 | hisS      | CDS  |
| S88                  | 2688679           | s                 |        | UTI89_C2841 | pbpC      | CDS  |
| APEC                 | 2815313           | s                 |        | UTI89_C2845 | pepB      | CDS  |
| UTI89                | 2804210           | s                 |        | UTI89_C2848 | hscA      | CDS  |
| APEC                 | 2819674           | s                 |        | UTI89_C2851 | iscU      | CDS  |
| UTI89                | 2812613           | ns                |        | UTI89_C2857 | csiE      | CDS  |
| S88                  | 2724157           | s                 |        | UTI89_C2871 | hmpA      | CDS  |
| UTI89                | 2829805           | ns                |        | UTI89_C2873 | yfhA      | CDS  |
| AS                   | 2849664           | ins               |        | UTI89_C2877 | purL      | CDS  |
| APEC                 | 2849665           | ins               |        | UTI89_C2877 | purL      | CDS  |
| S88                  | 2734390           | ns                |        | UTI89_C2878 | yfhD      | CDS  |
| AS                   | 2863094           | ns                |        | UTI89_C2894 | rseA      | CDS  |
| UTI89                | 2852244           | ns                |        | UTI89_C2896 | nadB      | CDS  |
| APEC                 | 2871728           | ns                | rec    | UTI89_C2903 | yfiF      | CDS  |
| APEC                 | 2871732           | s                 | rec    | UTI89_C2903 | yfiF      | CDS  |
| APEC                 | 2871738           | s                 | rec    | UTI89_C2903 | yfiF      | CDS  |
| APEC                 | 2871744           | ns                | rec    | UTI89_C2903 | yfiF      | CDS  |
| APEC                 | 2871746           | ns                | rec    | UTI89_C2903 | yfiF      | CDS  |
| APEC                 | 2871748           | ns                | rec    | UTI89_C2903 | yfiF      | CDS  |
| APEC                 | 2871750           | s                 | rec    | UTI89_C2903 | yfiF      | CDS  |
| APEC                 | 2871754           | ns                | rec    | UTI89_C2903 | yfiF      | CDS  |
| APEC                 | 2871755           | ns                | rec    | UTI89_C2903 | yfiF      | CDS  |
| UTI89                | 2863908           | ns                |        | UTI89_C2907 | yfiQ      | CDS  |
| UTI89                | 2867376           | ns                |        | UTI89_C2910 | kgtP      | CDS  |
| S88                  | 2766612           | ns                |        | UTI89_C2913 | -         | CDS  |
| UTI89                | 2870448           | ns                |        | UTI89_C2916 | -         | CDS  |
| S88                  | 2768769           | ins               |        | UTI89_C2916 | -         | CDS  |
| APEC                 | 2885396           | del-6             |        | UTI89_C2916 | -         | CDS  |
| UTI89                | 2870533           | ins               |        | UTI89_C2916 | -         | CDS  |
| APEC                 | 2888816           | nc                | rec    | intergenic  |           |      |
| APEC                 | 2888819           | nc                | rec    | intergenic  |           |      |
| APEC                 | 2888820           | nc                | rec    | intergenic  |           |      |
| APEC                 | 2889094           | ns                | rec    | UTI89_C2923 | -         | CDS  |
| APEC                 | 2889557           | ins               | rec    | intergenic  |           |      |
| APEC                 | 2889585           | ins               | rec    | intergenic  |           |      |
| APEC                 | 2889603           | ins               | rec    | intergenic  |           |      |
| APEC                 | 2889626           | ins               | rec    | intergenic  |           |      |
| APEC                 | 2889735           | ins               | rec    | intergenic  |           |      |
| APEC                 | 2889744           | nc                | rec    | intergenic  |           |      |
| APEC                 | 2889792           | ins               | rec    | intergenic  |           |      |
| APEC                 | 2889816           | ins               | rec    | intergenic  |           |      |

| lineage <sup>a</sup> | site <sup>b</sup> | mutation          |        | gene        | Gene name | Type |
|----------------------|-------------------|-------------------|--------|-------------|-----------|------|
|                      |                   | type <sup>c</sup> | recomb |             |           |      |
| APEC                 | 2889832           | ins               | rec    | intergenic  |           |      |
| APEC                 | 2889956           | ins               | rec    | intergenic  |           |      |
| APEC                 | 2889979           | nc                | rec    | intergenic  |           |      |
| APEC                 | 2890003           | ins               | rec    | intergenic  |           |      |
| APEC                 | 2890027           | ins               | rec    | intergenic  |           |      |
| APEC                 | 2890120           | nc                | rec    | intergenic  |           |      |
| APEC                 | 2890174           | nc                | rec    | intergenic  |           |      |
| APEC                 | 2890247           | nc                | rec    | intergenic  |           |      |
| AS                   | 2890436           | nc                |        | intergenic  |           |      |
| UTI89                | 2875535           | ins               |        | UTI89_C2924 | -         | CDS  |
| APEC                 | 2890567           | ns                | rec    | UTI89_C2924 | -         | CDS  |
| APEC                 | 2890618           | s                 | rec    | UTI89_C2924 | -         | CDS  |
| APEC                 | 2890620           | ns                | rec    | UTI89_C2924 | -         | CDS  |
| APEC                 | 2890633           | s                 | rec    | UTI89_C2924 | -         | CDS  |
| AS                   | 2895044           | ns                |        | UTI89_C2927 | rluD      | CDS  |
| UTI89                | 2885116           | ns                |        | UTI89_C2934 | aroF      | CDS  |
| APEC                 | 2904188           | ins               |        | UTI89_C2940 | trmD      | CDS  |
| APEC                 | 2904219           | ins               |        | UTI89_C2940 | trmD      | CDS  |
| UTI89                | 2893261           | ns                |        | UTI89_C2945 | yfjD      | CDS  |
| APEC                 | 2920598           | ins               |        | UTI89_C2960 | -         | CDS  |
| APEC                 | 2924611           | ns                |        | UTI89_C2965 | -         | CDS  |
| S88                  | 2858152           | ins               |        | intergenic  |           |      |
| APEC                 | 2941333           | ns                |        | UTI89_C2988 | -         | CDS  |
| S88                  | 2858799           | nc                |        | intergenic  |           |      |
| APEC                 | 2943155           | ns                |        | UTI89_C2992 | -         | CDS  |
| S88                  | 2862051           | s                 |        | UTI89_C2994 | ydfU1     | CDS  |
| APEC                 | 2947345           | ns                |        | UTI89_C2998 | -         | CDS  |
| AS                   | 2950761           | nc                |        | intergenic  |           |      |
| UTI89/AS             | 2942184           | ns                |        | UTI89_C3012 | -         | CDS  |
| S88                  | 2876060           | nc                |        | intergenic  |           |      |
| UTI89                | 2952549           | s                 |        | UTI89_C3024 | ygaP      | CDS  |
| APEC                 | 2968781           | del               |        | intergenic  |           |      |
| UTI89                | 2954500           | nc                |        | intergenic  |           |      |
| APEC                 | 2969699           | s                 |        | UTI89_C3028 | ygaC      | CDS  |
| APEC                 | 2982144           | ns                |        | UTI89_C3043 | ygaH      | CDS  |
| S88                  | 2899903           | ns                |        | UTI89_C3044 | mprA      | CDS  |
| AS                   | 2983229           | s                 |        | UTI89_C3045 | emrA      | CDS  |
| APEC                 | 2985767           | ns                |        | UTI89_C3046 | emrB      | CDS  |
| S88                  | 2904226           | ns                |        | UTI89_C3048 | -         | CDS  |
| UTI89                | 2976810           | nc                | rec    | intergenic  |           |      |
| AS                   | 2991839           | ins               |        | intergenic  |           |      |
| UTI89                | 2976814           | nc                | rec    | intergenic  |           |      |



| lineage <sup>a</sup> | site <sup>b</sup> | mutation          |        | gene        | Gene name | Type |
|----------------------|-------------------|-------------------|--------|-------------|-----------|------|
|                      |                   | type <sup>c</sup> | recomb |             |           |      |
| UTI89                | 2991848           | nc                | rec    | intergenic  |           |      |
| UTI89                | 2976823           | nc                | rec    | intergenic  |           |      |
| UTI89                | 2976827           | nc                | rec    | intergenic  |           |      |
| AS                   | 2991856           | del-2             |        | intergenic  |           |      |
| UTI89                | 2976836           | nc                | rec    | intergenic  |           |      |
| UTI89                | 2976840           | nc                | rec    | intergenic  |           |      |
| APEC                 | 2994313           | s                 |        | UTI89_C3058 | alaS      | CDS  |
| APEC                 | 2996192           | s                 |        | UTI89_C3060 | oraA      | CDS  |
| APEC                 | 3008970           | s                 |        | UTI89_C3074 | hypF      | CDS  |
| APEC                 | 3013043           | nc                |        | intergenic  |           |      |
| UTI89                | 3001650           | ins-9             |        | intergenic  |           |      |
| S88                  | 2936065           | ns                |        | UTI89_C3083 | hycF      | CDS  |
| APEC                 | 3020683           | s                 |        | UTI89_C3084 | hycE      | CDS  |
| AS                   | 3021350           | ns                |        | UTI89_C3085 | hycD      | CDS  |
| UTI89                | 3009573           | nc                |        | intergenic  |           |      |
| AS                   | 3030593           | ns                |        | UTI89_C3094 | fhIA      | CDS  |
| APEC                 | 3036221           | ns                |        | UTI89_C3102 | ygbJ      | CDS  |
| UTI89                | 3030738           | ns                |        | UTI89_C3112 | nlpD      | CDS  |
| APEC                 | 3049349           | s                 |        | UTI89_C3119 | ygbQ      | CDS  |
| APEC                 | 3050535           | s                 |        | UTI89_C3121 | cysC      | CDS  |
| APEC                 | 3063917           | s                 |        | UTI89_C3135 | ygcS      | CDS  |
| APEC                 | 3063924           | del-9             |        | UTI89_C3135 | ygcS      | CDS  |
| APEC                 | 3067071           | ns                |        | UTI89_C3137 | ygcW      | CDS  |
| S88                  | 2984959           | del               |        | UTI89_C3137 | ygcW      | CDS  |
| S88                  | 2989648           | del-12            |        | UTI89_C3142 | -         | CDS  |
| UTI89                | 3057930           | ns                |        | UTI89_C3142 | -         | CDS  |
| APEC                 | 3073363           | ins               |        | UTI89_C3144 | -         | CDS  |
| UTI89                | 3059721           | ns                |        | UTI89_C3145 | -         | CDS  |
| S88                  | 2995493           | s                 |        | UTI89_C3149 | pyrG      | CDS  |
| AS                   | 3078946           | ns                |        | UTI89_C3150 | mazG      | CDS  |
| AS                   | 3091170           | nc                |        | intergenic  |           |      |
| S88                  | 3009373           | s                 |        | UTI89_C3161 | truC      | CDS  |
| UTI89                | 3079264           | s                 |        | UTI89_C3163 | syd       | CDS  |
| UTI89                | 3079927           | ns                |        | UTI89_C3164 | yqcD      | CDS  |
| S88                  | 3011922           | ns                |        | UTI89_C3164 | yqcD      | CDS  |
| UTI89                | 3081153           | s                 |        | UTI89_C3165 | ygdH      | CDS  |
| UTI89                | 3082908           | ns                |        | UTI89_C3167 | sdaC      | CDS  |
| APEC                 | 3108534           | ns                |        | UTI89_C3177 | fucR      | CDS  |
| UTI89                | 3098812           | ns                |        | UTI89_C3183 | -         | CDS  |
| APEC                 | 3118818           | ns                |        | UTI89_C3191 | -         | CDS  |
| UTI89                | 3105017           | ns                |        | UTI89_C3192 | -         | CDS  |

| lineage <sup>a</sup> | site <sup>b</sup> | mutation          |        | gene        | Gene name | Type |
|----------------------|-------------------|-------------------|--------|-------------|-----------|------|
|                      |                   | type <sup>c</sup> | recomb |             |           |      |
| UTI89/AS             | 3115492           | indel-10          |        | UTI89_C3199 | -         | CDS  |
| S88                  | 3051654           | s                 |        | intergenic  |           |      |
| UTI89                | 3121450           | ns                |        | intergenic  |           |      |
| S88                  | 3055461           | ns                |        | UTI89_C3205 | -         | CDS  |
| APEC                 | 3146473           | nc                |        | intergenic  |           |      |
| UTI89                | 3133250           | ns                |        | UTI89_C3212 | -         | CDS  |
| UTI89                | 3133803           | s                 |        | UTI89_C3213 | -         | CDS  |
| APEC                 | 3154779           | ins-3             |        | UTI89_C3216 | -         | CDS  |
| S88                  | 3069563           | ins-3             |        | UTI89_C3216 | -         | CDS  |
| UTI89                | 3137690           | del-9             |        | UTI89_C3216 | -         | CDS  |
| UTI89                | 3139660           | ns                |        | UTI89_C3219 | argA      | CDS  |
| APEC                 | 3162315           | ns                |        | UTI89_C3221 | recB      | CDS  |
| AS                   | 3166588           | nc                |        | intergenic  |           |      |
| APEC                 | 3172715           | s                 |        | UTI89_C3230 | lgt       | CDS  |
| UTI89                | 3166862           | nc                |        | intergenic  |           |      |
| AS                   | 3190144           | s                 |        | UTI89_C3245 | -         | CDS  |
| APEC                 | 3190393           | s                 |        | UTI89_C3245 | -         | CDS  |
| S88                  | 3106639           | nc                |        | intergenic  |           |      |
| APEC                 | 3205305           | ns                |        | UTI89_C3257 | ygeY      | CDS  |
| UTI89                | 3188698           | s                 |        | UTI89_C3257 | ygeY      | CDS  |
| APEC                 | 3211214           | ns                |        | UTI89_C3262 | ygfJ      | CDS  |
| AS                   | 3214164           | s                 |        | UTI89_C3263 | ygfK      | CDS  |
| APEC                 | 3216976           | s                 |        | UTI89_C3265 | ygfM      | CDS  |
| AS                   | 3226463           | s                 |        | UTI89_C3271 | ygfT      | CDS  |
| UTI89                | 3210038           | ns                |        | UTI89_C3272 | ygfU      | CDS  |
| APEC                 | 3242759           | ns                |        | UTI89_C3288 | gcvP      | CDS  |
| UTI89                | 3229145           | ns                |        | UTI89_C3292 | visC      | CDS  |
| AS                   | 3247188           | s                 |        | UTI89_C3293 | ubiH      | CDS  |
| UTI89                | 3242026           | ns                |        | UTI89_C3306 | yggA      | CDS  |
| AS                   | 3263042           | ns                |        | UTI89_C3310 | epd       | CDS  |
| UTI89                | 3248554           | s                 |        | UTI89_C3313 | -         | CDS  |
| APEC                 | 3296792           | ns                |        | UTI89_C3349 | yggL      | CDS  |
| UTI89                | 3280580           | s                 |        | UTI89_C3351 | mutY      | CDS  |
| S88                  | 3217413           | s                 |        | UTI89_C3356 | speC      | CDS  |
| S88                  | 3231571           | nc                |        | intergenic  |           |      |
| APEC                 | 3324534           | nc                |        | intergenic  |           |      |
| S88                  | 3255479           | nc                |        | intergenic  |           |      |
| APEC                 | 3342053           | nc                |        | intergenic  |           |      |
| APEC/S88             | 3346623           | indel-8           |        | intergenic  |           |      |
| S88                  | 3261650           | nc                |        | intergenic  |           |      |
| APEC                 | 3349782           | nc                |        | intergenic  |           |      |

| lineage <sup>a</sup> | site <sup>b</sup> | mutation          |        | gene        | Gene name | Type |
|----------------------|-------------------|-------------------|--------|-------------|-----------|------|
|                      |                   | type <sup>c</sup> | recomb |             |           |      |
| APEC                 | 3353196           | nc                |        | intergenic  |           |      |
| S88                  | 3268426           | nc                |        | intergenic  |           |      |
| AS                   | 3360899           | del               |        | intergenic  |           |      |
| APEC                 | 3361664           | nc                |        | intergenic  |           |      |
| APEC                 | 3361785           | nc                |        | intergenic  |           |      |
| S88                  | 3276588           | nc                |        | intergenic  |           |      |
| APEC                 | 3362138           | ns                |        | UTI89_C3362 | kpsF      | CDS  |
| AS                   | 3363263           | ns                |        | UTI89_C3363 | kpsE      | CDS  |
| UTI89                | 3298631           | ns                |        | UTI89_C3369 | neuE      | CDS  |
| APEC                 | 3375752           | ns                | rec    | UTI89_C3372 | neuB      | CDS  |
| APEC                 | 3375755           | ns                | rec    | UTI89_C3372 | neuB      | CDS  |
| APEC                 | 3375758           | ns                | rec    | UTI89_C3372 | neuB      | CDS  |
| APEC                 | 3379594           | ns                |        | UTI89_C3376 | gspM      | CDS  |
| APEC                 | 3379825           | s                 |        | UTI89_C3377 | gspL      | CDS  |
| S88                  | 3295499           | s                 |        | UTI89_C3377 | gspL      | CDS  |
| APEC                 | 3380764           | s                 |        | UTI89_C3377 | gspL      | CDS  |
| S88                  | 3296457           | s                 |        | UTI89_C3378 | gspK      | CDS  |
| APEC                 | 3388503           | ns                |        | UTI89_C3385 | gspD      | CDS  |
| S88                  | 3308818           | s                 |        | UTI89_C3389 | yghJ      | CDS  |
| S88                  | 3308989           | s                 |        | UTI89_C3389 | yghJ      | CDS  |
| S88                  | 3313498           | ns                |        | UTI89_C3392 | glcB      | CDS  |
| APEC                 | 3402002           | nc                |        | intergenic  |           |      |
| APEC                 | 3414017           | s                 |        | UTI89_C3404 | -         | CDS  |
| APEC                 | 3432426           | ns                |        | UTI89_C3422 | yghZ      | CDS  |
| S88                  | 3351397           | s                 |        | UTI89_C3428 | metC      | CDS  |
| S88                  | 3360716           | nc                |        | intergenic  |           |      |
| UTI89                | 3373447           | ns                |        | UTI89_C3437 | -         | CDS  |
| S88                  | 3371708           | s                 |        | UTI89_C3446 | parC      | CDS  |
| APEC                 | 3458200           | ns                |        | UTI89_C3447 | -         | CDS  |
| S88                  | 3377753           | s                 |        | UTI89_C3453 | -         | CDS  |
| APEC                 | 3463881           | nc                |        | intergenic  |           |      |
| APEC                 | 3466306           | s                 |        | UTI89_C3459 | -         | CDS  |
| S88                  | 3395334           | nc                |        | intergenic  |           |      |
| UTI89                | 3412782           | nc                |        | intergenic  |           |      |
| UTI89                | 3413113           | ins               |        | intergenic  |           |      |
| APEC                 | 3493238           | nc                |        | intergenic  |           |      |
| UTI89                | 3427774           | ns                |        | UTI89_C3490 | ygiF      | CDS  |
| UTI89                | 3444531           | nc                |        | intergenic  |           |      |
| AS                   | 3519124           | ns                |        | UTI89_C3510 | aer       | CDS  |
| S88                  | 3434204           | ns                |        | UTI89_C3510 | aer       | CDS  |
| APEC                 | 3523881           | ns                |        | UTI89_C3516 | ebgA      | CDS  |

| lineage <sup>a</sup> | site <sup>b</sup> | mutation          |        | gene        | Gene name | Type |
|----------------------|-------------------|-------------------|--------|-------------|-----------|------|
|                      |                   | type <sup>c</sup> | recomb |             |           |      |
| APEC                 | 3523903           | ns                |        | UTI89_C3516 | ebgA      | CDS  |
| UTI89                | 3455665           | s                 |        | UTI89_C3519 | ygjJ      | CDS  |
| APEC                 | 3543920           | s                 |        | UTI89_C3530 | uxaC      | CDS  |
| S88                  | 3469668           | s                 |        | UTI89_C3545 | -         | CDS  |
| S88                  | 3472293           | ns                |        | UTI89_C3547 | tdcG      | CDS  |
| S88                  | 3477691           | ns                |        | UTI89_C3551 | tdcC      | CDS  |
| AS                   | 3564880           | del-6             |        | intergenic  |           |      |
| AS                   | 3572338           | s                 |        | UTI89_C3559 | garD      | CDS  |
| S88                  | 3494717           | nc                |        | intergenic  |           |      |
| S88                  | 3496097           | s                 |        | UTI89_C3568 | agaY      | CDS  |
| APEC                 | 3586106           | nc                |        | intergenic  |           |      |
| UTI89                | 3517552           | ns                |        | UTI89_C3578 | yraQ      | CDS  |
| UTI89                | 3525829           | ns                |        | UTI89_C3590 | deaD      | CDS  |
| S88                  | 3521232           | s                 |        | UTI89_C3598 | infB      | CDS  |
| UTI89                | 3550309           | s                 |        | UTI89_C3616 | yhbZ      | CDS  |
| UTI89                | 3550318           | ns                |        | UTI89_C3616 | yhbZ      | CDS  |
| UTI89                | 3550306           | del-12            |        | UTI89_C3616 | yhbZ      | CDS  |
| UTI89                | 3552525           | nc                |        | intergenic  |           |      |
| AS                   | 3629597           | s                 |        | UTI89_C3626 | yrbB      | CDS  |
| APEC                 | 3640398           | ns                |        | UTI89_C3641 | yhbJ      | CDS  |
| S88                  | 3557427           | ns                |        | UTI89_C3645 | yhbL      | CDS  |
| APEC                 | 3653635           | ns                |        | UTI89_C3651 | yhcH      | CDS  |
| S88                  | 3570778           | s                 |        | UTI89_C3654 | nanT      | CDS  |
| S88                  | 3578425           | s                 |        | UTI89_C3665 | degQ      | CDS  |
| APEC                 | 3671809           | ns                |        | UTI89_C3673 | yhcR      | CDS  |
| S88                  | 3588188           | ns                |        | UTI89_C3675 | tldD      | CDS  |
| S88                  | 3602806           | s                 |        | UTI89_C3688 | accB      | CDS  |
| AS                   | 3697788           | ns                |        | UTI89_C3698 | -         | CDS  |
| S88                  | 3619445           | ins               |        | intergenic  |           |      |
| UTI89                | 3633752           | s                 |        | UTI89_C3708 | acrF      | CDS  |
| UTI89                | 3639450           | ns                |        | UTI89_C3712 | yhdY      | CDS  |
| UTI89                | 3642556           | ns                |        | UTI89_C3718 | -         | CDS  |
| APEC                 | 3715943           | nc                |        | intergenic  |           |      |
| APEC                 | 3715985           | nc                |        | intergenic  |           |      |
| APEC                 | 3716261           | nc                | rec    | intergenic  |           |      |
| APEC                 | 3716262           | nc                | rec    | intergenic  |           |      |
| APEC                 | 3716271           | nc                | rec    | intergenic  |           |      |
| APEC                 | 3716272           | nc                | rec    | intergenic  |           |      |
| APEC                 | 3716280           | nc                | rec    | intergenic  |           |      |
| APEC                 | 3716313           | nc                | rec    | intergenic  |           |      |
| APEC                 | 3716318           | ins               | rec    | intergenic  |           |      |

| lineage <sup>a</sup> | site <sup>b</sup> | mutation          |        | gene        | Gene name | Type |
|----------------------|-------------------|-------------------|--------|-------------|-----------|------|
|                      |                   | type <sup>c</sup> | recomb |             |           |      |
| APEC                 | 3716320           | nc                | rec    | intergenic  |           |      |
| APEC                 | 3716939           | ins               | rec    | intergenic  |           |      |
| APEC                 | 3716951           | ins               | rec    | intergenic  |           |      |
| APEC                 | 3717142           | s                 | rec    | UTI89_C3719 | -         | CDS  |
| S88                  | 3631966           | ns                |        | UTI89_C3719 | -         | CDS  |
| APEC                 | 3717350           | nc                | rec    | intergenic  |           |      |
| APEC                 | 3717409           | nc                | rec    | intergenic  |           |      |
| APEC                 | 3717514           | nc                | rec    | intergenic  |           |      |
| APEC                 | 3717532           | nc                | rec    | intergenic  |           |      |
| APEC                 | 3717917           | nc                | rec    | intergenic  |           |      |
| APEC                 | 3717923           | nc                | rec    | intergenic  |           |      |
| APEC                 | 3717926           | nc                | rec    | intergenic  |           |      |
| APEC                 | 3717927           | nc                | rec    | intergenic  |           |      |
| APEC                 | 3718201           | ns                | rec    | UTI89_C3723 | -         | CDS  |
| APEC                 | 3719567           | nc                | rec    | intergenic  |           |      |
| APEC                 | 3719626           | nc                | rec    | intergenic  |           |      |
| APEC                 | 3719627           | nc                | rec    | intergenic  |           |      |
| APEC                 | 3719630           | nc                | rec    | intergenic  |           |      |
| APEC                 | 3719631           | nc                | rec    | intergenic  |           |      |
| APEC                 | 3719632           | nc                | rec    | intergenic  |           |      |
| APEC                 | 3719641           | nc                | rec    | intergenic  |           |      |
| APEC                 | 3719642           | nc                | rec    | intergenic  |           |      |
| APEC                 | 3741334           | ns                |        | UTI89_C3770 | rplB      | CDS  |
| APEC                 | 3745034           | ins               |        | UTI89_C3778 | yheD      | CDS  |
| APEC                 | 3745048           | s                 |        | UTI89_C3778 | yheD      | CDS  |
| APEC                 | 3745049           | ins-2             |        | UTI89_C3778 | yheD      | CDS  |
| APEC                 | 3745055           | ins               |        | UTI89_C3778 | yheD      | CDS  |
| APEC                 | 3745068           | ins               |        | UTI89_C3778 | yheD      | CDS  |
| APEC                 | 3745082           | ins               |        | UTI89_C3778 | yheD      | CDS  |
| APEC                 | 3745086           | ins               |        | UTI89_C3778 | yheD      | CDS  |
| APEC                 | 3745125           | ins               |        | UTI89_C3778 | yheD      | CDS  |
| APEC                 | 3745143           | ins               |        | UTI89_C3778 | yheD      | CDS  |
| APEC                 | 3745161           | ins               |        | UTI89_C3778 | yheD      | CDS  |
| APEC                 | 3745167           | ins               |        | UTI89_C3778 | yheD      | CDS  |
| AS                   | 3745780           | del-13            |        | UTI89_C3778 | yheD      | CDS  |
| S88                  | 3660560           | ins-13            |        | UTI89_C3778 | yheD      | CDS  |
| APEC                 | 3745781           | ins-19            |        | UTI89_C3778 | yheD      | CDS  |
| APEC                 | 3745822           | ins               |        | UTI89_C3778 | yheD      | CDS  |
| APEC                 | 3749491           | ns                |        | UTI89_C3781 | yheG      | CDS  |
| S88                  | 3668804           | s                 |        | intergenic  |           |      |
| APEC                 | 3760585           | ins-10            |        | UTI89_C3793 | yheB      | CDS  |

| lineage <sup>a</sup> | site <sup>b</sup> | mutation          |        | gene        | Gene name | Type |
|----------------------|-------------------|-------------------|--------|-------------|-----------|------|
|                      |                   | type <sup>c</sup> | recomb |             |           |      |
| S88                  | 4411761           | nc                |        | intergenic  |           |      |
| S88                  | 4447035           | del-4             |        | UTI89_C3808 | -         | CDS  |
| APEC                 | 4531791           | nc                | rec    | intergenic  |           |      |
| APEC                 | 4531790           | nc                | rec    | intergenic  |           |      |
| APEC                 | 4531781           | nc                | rec    | intergenic  |           |      |
| APEC                 | 4531780           | nc                | rec    | intergenic  |           |      |
| APEC                 | 4531772           | nc                | rec    | intergenic  |           |      |
| APEC                 | 4531739           | nc                | rec    | intergenic  |           |      |
| APEC                 | 4531732           | nc                | rec    | intergenic  |           |      |
| APEC                 | 4531108           | nc                | rec    | intergenic  |           |      |
| APEC                 | 4530902           | ns                | rec    | UTI89_C3809 | -         | CDS  |
| APEC                 | 4530878           | ns                | rec    | UTI89_C3809 | -         | CDS  |
| APEC                 | 4530645           | nc                | rec    | intergenic  |           |      |
| APEC                 | 4530540           | nc                | rec    | intergenic  |           |      |
| APEC                 | 4530493           | nc                | rec    | intergenic  |           |      |
| APEC                 | 4529295           | nc                | rec    | intergenic  |           |      |
| APEC                 | 4528929           | nc                | rec    | intergenic  |           |      |
| APEC                 | 4528875           | nc                | rec    | intergenic  |           |      |
| UTI89/AS             | 3698065           | nc                |        | intergenic  |           |      |
| S88                  | 4443291           | nc                |        | intergenic  |           |      |
| APEC                 | 4528741           | nc                | rec    | intergenic  |           |      |
| APEC                 | 4528673           | nc                | rec    | intergenic  |           |      |
| APEC                 | 4528652           | nc                | rec    | intergenic  |           |      |
| APEC                 | 4528634           | nc                | rec    | intergenic  |           |      |
| APEC                 | 4528581           | nc                | rec    | intergenic  |           |      |
| APEC                 | 4528539           | nc                | rec    | intergenic  |           |      |
| UTI89/AS             | 3706383           | ns                |        | UTI89_C3820 | yjaG      | CDS  |
| UTI89/AS             | 3722302           | s                 |        | UTI89_C3832 | rpoB      | CDS  |
| UTI89                | 3728156           | ns                |        | UTI89_C3841 | tufA      | CDS  |
| UTI89                | 3728166           | s                 |        | UTI89_C3841 | tufA      | CDS  |
| UTI89                | 3728169           | s                 |        | UTI89_C3841 | tufA      | CDS  |
| AS                   | 3761000           | s                 |        | UTI89_C3841 | tufA      | CDS  |
| UTI89                | 3728295           | s                 |        | UTI89_C3841 | tufA      | CDS  |
| AS                   | 3761273           | s                 |        | UTI89_C3841 | tufA      | CDS  |
| UTI89                | 3728967           | s                 |        | UTI89_C3841 | tufA      | CDS  |
| S88                  | 3700850           | ns                |        | UTI89_C3869 | nirB      | CDS  |
| S88                  | 3714285           | s                 |        | UTI89_C3883 | gph       | CDS  |
| AS                   | 3813671           | ns                |        | UTI89_C3896 | yrfF      | CDS  |
| APEC                 | 3815788           | s                 |        | UTI89_C3899 | hslO      | CDS  |
| S88                  | 3730646           | s                 |        | UTI89_C3899 | hslO      | CDS  |
| S88                  | 3755234           | s                 |        | UTI89_C3919 | malT      | CDS  |

| lineage <sup>a</sup> | site <sup>b</sup> | mutation          |        | gene        | Gene name | Type |
|----------------------|-------------------|-------------------|--------|-------------|-----------|------|
|                      |                   | type <sup>c</sup> | recomb |             |           |      |
| APEC                 | 3844805           | ns                |        | UTI89_C3922 | rtcR      | CDS  |
| AS                   | 3845213           | del               |        | UTI89_C3922 | rtcR      | CDS  |
| APEC                 | 3847303           | ns                |        | UTI89_C3925 | glpE      | CDS  |
| S88                  | 3764277           | ns                |        | UTI89_C3927 | -         | CDS  |
| UTI89                | 3819082           | del               |        | intergenic  |           |      |
| APEC                 | 3853048           | ins-8             |        | UTI89_C3930 | aufF      | CDS  |
| AS                   | 3853399           | del               |        | UTI89_C3931 | aufE      | CDS  |
| AS                   | 3857065           | s                 |        | UTI89_C3935 | aufB      | CDS  |
| UTI89                | 3825492           | ns                |        | UTI89_C3936 | aufA      | CDS  |
| UTI89                | 3829512           | ns                |        | UTI89_C3938 | glgA      | CDS  |
| UTI89                | 3831347           | s                 |        | UTI89_C3939 | glgC      | CDS  |
| UTI89                | 3832427           | ns                |        | UTI89_C3940 | glgX      | CDS  |
| S88                  | 3782555           | s                 |        | UTI89_C3941 | glgB      | CDS  |
| AS                   | 3876781           | nc                |        | intergenic  |           |      |
| S88                  | 3793308           | nc                |        | intergenic  |           |      |
| APEC                 | 3885870           | ns                |        | UTI89_C3960 | ugpB      | CDS  |
| APEC                 | 3891828           | s                 |        | UTI89_C3966 | -         | CDS  |
| APEC                 | 3897280           | ns                |        | UTI89_C3974 | -         | CDS  |
| APEC                 | 3902838           | ns                |        | UTI89_C3979 | ftsY      | CDS  |
| UTI89                | 3873522           | s                 |        | UTI89_C3984 | zntA      | CDS  |
| APEC                 | 3909016           | s                 |        | UTI89_C3987 | yhhQ      | CDS  |
| S88                  | 3825348           | ns                |        | UTI89_C3989 | yhhS      | CDS  |
| S88                  | 3827707           | ns                |        | UTI89_C3993 | nikA      | CDS  |
| UTI89                | 3880907           | ns                |        | UTI89_C3993 | nikA      | CDS  |
| UTI89                | 3881372           | ns                |        | UTI89_C3993 | nikA      | CDS  |
| S88                  | 3831612           | ns                |        | UTI89_C3996 | nikD      | CDS  |
| S88                  | 3839018           | s                 |        | UTI89_C4006 | yhhJ      | CDS  |
| APEC                 | 3925162           | ns                |        | UTI89_C4006 | yhhJ      | CDS  |
| UTI89                | 3904420           | ns                |        | UTI89_C4016 | yhiQ      | CDS  |
| APEC                 | 3941697           | ns                |        | UTI89_C4019 | gor       | CDS  |
| AS                   | 3943404           | ns                |        | UTI89_C4022 | -         | CDS  |
| S88                  | 3858728           | ns                |        | UTI89_C4023 | -         | CDS  |
| UTI89                | 3915496           | s                 |        | UTI89_C4028 | chuA      | CDS  |
| S88                  | 3865685           | s                 |        | UTI89_C4034 | chuW      | CDS  |
| APEC                 | 3956382           | nc                |        | intergenic  |           |      |
| UTI89                | 3928162           | ns                |        | UTI89_C4046 | yhiV      | CDS  |
| AS                   | 3964201           | nc                |        | intergenic  |           |      |
| APEC                 | 3964543           | del               |        | intergenic  |           |      |
| S88                  | 3879865           | ns                |        | UTI89_C4048 | yhiX      | CDS  |
| S88                  | 3890459           | ns                |        | UTI89_C4056 | yhjG      | CDS  |
| UTI89                | 3947345           | ns                |        | UTI89_C4059 | yhjJ      | CDS  |
| S88                  | 3897673           | nc                |        | intergenic  |           |      |

| lineage <sup>a</sup> | site <sup>b</sup> | mutation          |        | gene        | Gene name | Type |
|----------------------|-------------------|-------------------|--------|-------------|-----------|------|
|                      |                   | type <sup>c</sup> | recomb |             |           |      |
| APEC                 | 3983759           | ns                |        | UTI89_C4061 | yhjK      | CDS  |
| UTI89                | 3952712           | s                 |        | UTI89_C4062 | yhjL      | CDS  |
| S88                  | 3908839           | del               |        | UTI89_C4065 | yhjO      | CDS  |
| S88                  | 3911759           | s                 |        | UTI89_C4068 | yhjS      | CDS  |
| S88                  | 3912625           | ns                |        | UTI89_C4070 | yhjU      | CDS  |
| S88                  | 3914910           | s                 |        | UTI89_C4074 | -         | CDS  |
| AS                   | 4002418           | s                 |        | UTI89_C4078 | dppF      | CDS  |
| UTI89                | 3994180           | s                 |        | UTI89_C4105 | xylB      | CDS  |
| APEC                 | 4028594           | ns                |        | UTI89_C4106 | xylA      | CDS  |
| AS                   | 4034743           | del-10            |        | UTI89_C4110 | xylR      | CDS  |
| APEC                 | 4034744           | ins-10            |        | UTI89_C4110 | xylR      | CDS  |
| S88                  | 3949483           | del               |        | UTI89_C4110 | xylR      | CDS  |
| S88                  | 3950744           | ns                |        | UTI89_C4112 | -         | CDS  |
| AS                   | 4038802           | s                 |        | UTI89_C4114 | avtA      | CDS  |
| UTI89                | 4009250           | s                 |        | UTI89_C4117 | yiaK      | CDS  |
| AS                   | 4042626           | ns                |        | UTI89_C4118 | yiaL      | CDS  |
| S88                  | 3959410           | ns                |        | UTI89_C4121 | yiaN      | CDS  |
| UTI89                | 4015231           | ns                |        | UTI89_C4124 | lyxK      | CDS  |
| S88                  | 3963881           | s                 |        | UTI89_C4126 | sgbU      | CDS  |
| UTI89                | 4017100           | ns                |        | UTI89_C4127 | sgbE      | CDS  |
| APEC                 | 4051924           | ns                |        | UTI89_C4129 | aldB      | CDS  |
| S88                  | 3971662           | ns                |        | UTI89_C4133 | selA      | CDS  |
| APEC                 | 4059675           | ns                |        | UTI89_C4135 | yibH      | CDS  |
| UTI89                | 4038610           | ns                |        | UTI89_C4143 | -         | CDS  |
| APEC                 | 4075347           | ns                |        | UTI89_C4146 | lldD      | CDS  |
| APEC                 | 4086450           | ns                |        | UTI89_C4163 | kbl       | CDS  |
| AS                   | 4090036           | ns                |        | UTI89_C4166 | rfaC      | CDS  |
| APEC                 | 4103104           | nc                |        | intergenic  |           |      |
| UTI89                | 4072891           | s                 |        | UTI89_C4184 | dut       | CDS  |
| S88                  | 4022806           | ns                |        | UTI89_C4188 | yicC      | CDS  |
| UTI89                | 4081357           | s                 |        | UTI89_C4195 | spoT      | CDS  |
| UTI89                | 4089040           | ns                |        | UTI89_C4200 | yicH      | CDS  |
| S88                  | 4041866           | s                 |        | UTI89_C4205 | -         | CDS  |
| APEC                 | 4134113           | ns                |        | UTI89_C4210 | yicJ      | CDS  |
| S88                  | 4052620           | s                 |        | UTI89_C4214 | yicL      | CDS  |
| UTI89                | 4109445           | ns                |        | UTI89_C4220 | yicO      | CDS  |
| S88                  | 4060966           | ns                |        | UTI89_C4223 | uhpC      | CDS  |
| S88                  | 4065668           | s                 |        | UTI89_C4227 | ilvB      | CDS  |
| APEC                 | 4155092           | ins               |        | intergenic  |           |      |
| AS                   | 4156261           | ns                |        | UTI89_C4233 | yidK      | CDS  |
| AS                   | 4156288           | del-11            |        | UTI89_C4233 | yidK      | CDS  |



| lineage <sup>a</sup> | site <sup>b</sup> | mutation          |        | gene        | Gene name | Type |
|----------------------|-------------------|-------------------|--------|-------------|-----------|------|
|                      |                   | type <sup>c</sup> | recomb |             |           |      |
| APEC                 | 4156289           | ins-11            |        | UTI89_C4233 | yidK      | CDS  |
| S88                  | 4071014           | del               |        | UTI89_C4233 | yidK      | CDS  |
| S88                  | 4071738           | del               |        | UTI89_C4233 | yidK      | CDS  |
| UTI89                | 4133561           | ns                |        | UTI89_C4243 | dgoA      | CDS  |
| S88                  | 4086477           | s                 |        | UTI89_C4248 | yidB      | CDS  |
| AS                   | 4189876           | s                 |        | UTI89_C4267 | yieG      | CDS  |
| APEC                 | 4190936           | ns                |        | UTI89_C4267 | yieG      | CDS  |
| S88                  | 4105945           | nc                |        | intergenic  |           |      |
| UTI89                | 4158742           | ins-5             |        | intergenic  |           |      |
| UTI89                | 4160304           | ns                |        | UTI89_C4269 | yieK      | CDS  |
| S88                  | 4116112           | s                 |        | UTI89_C4277 | pstB      | CDS  |
| UTI89                | 4172397           | nc                |        | intergenic  |           |      |
| APEC                 | 4205471           | ins-5             |        | intergenic  |           |      |
| AS                   | 4206407           | ns                |        | UTI89_C4281 | glmS      | CDS  |
| APEC                 | 4206508           | ns                |        | UTI89_C4281 | glmS      | CDS  |
| AS                   | 4207382           | nc                |        | intergenic  |           |      |
| APEC                 | 4209772           | s                 |        | UTI89_C4285 | atpD      | CDS  |
| UTI89                | 4179841           | s                 |        | UTI89_C4287 | atpA      | CDS  |
| S88                  | 4131218           | nc                |        | intergenic  |           |      |
| UTI89                | 4187124           | ns                |        | UTI89_C4297 | mioC      | CDS  |
| APEC                 | 4235385           | nc                | rec    | intergenic  |           |      |
| APEC                 | 4235420           | nc                | rec    | intergenic  |           |      |
| APEC                 | 4235609           | nc                | rec    | intergenic  |           |      |
| AS                   | 4235682           | nc                |        | intergenic  |           |      |
| APEC                 | 4236086           | nc                | rec    | intergenic  |           |      |
| APEC                 | 4236087           | nc                | rec    | intergenic  |           |      |
| APEC                 | 4236331           | nc                | rec    | intergenic  |           |      |
| UTI89                | 4204502           | nc                |        | intergenic  |           |      |
| AS                   | 4237341           | nc                |        | intergenic  |           |      |
| S88                  | 4152392           | ns                |        | UTI89_C4315 | -         | CDS  |
| UTI89                | 4207259           | nc                |        | intergenic  |           |      |
| UTI89                | 4207364           | nc                | rec    | intergenic  |           |      |
| UTI89                | 4207365           | nc                | rec    | intergenic  |           |      |
| UTI89                | 4207367           | nc                | rec    | intergenic  |           |      |
| UTI89                | 4207369           | nc                | rec    | intergenic  |           |      |
| UTI89                | 4207373           | nc                | rec    | intergenic  |           |      |
| UTI89                | 4207374           | nc                | rec    | intergenic  |           |      |
| APEC                 | 4240834           | ns                |        | UTI89_C4320 | hdfR      | CDS  |
| S88                  | 4161875           | ns                |        | UTI89_C4327 | ilvD      | CDS  |
| APEC                 | 4249690           | ns                |        | UTI89_C4328 | ilvA      | CDS  |
| APEC                 | 4251082           | s                 |        | UTI89_C4329 | ilvY      | CDS  |

| lineage <sup>a</sup> | site <sup>b</sup> | mutation          |        | gene        | Gene name | Type |
|----------------------|-------------------|-------------------|--------|-------------|-----------|------|
|                      |                   | type <sup>c</sup> | recomb |             |           |      |
| UTI89                | 4239927           | ns                |        | UTI89_C4351 | wzyE      | CDS  |
| APEC                 | 4275300           | nc                |        | intergenic  |           |      |
| AS                   | 4280735           | del-6             |        | UTI89_C4362 | hemX      | CDS  |
| S88                  | 4195443           | del-6             |        | UTI89_C4362 | hemX      | CDS  |
| S88                  | 4195482           | s                 |        | UTI89_C4362 | hemX      | CDS  |
| UTI89                | 4250508           | s                 |        | UTI89_C4364 | hemC      | CDS  |
| AS                   | 4288878           | ns                |        | UTI89_C4370 | -         | CDS  |
| UTI89                | 4260364           | s                 |        | UTI89_C4374 | xerC      | CDS  |
| S88                  | 4208217           | ns                |        | UTI89_C4376 | uvrD      | CDS  |
| S88                  | 4210837           | ns                |        | UTI89_C4377 | -         | CDS  |
| AS                   | 4299083           | ns                |        | UTI89_C4380 | -         | CDS  |
| UTI89                | 4267978           | ns                |        | UTI89_C4381 | -         | CDS  |
| APEC                 | 4309952           | ns                |        | UTI89_C4393 | metE      | CDS  |
| AS                   | 4314555           | ns                |        | UTI89_C4398 | -         | CDS  |
| S88                  | 4233695           | ns                |        | UTI89_C4401 | -         | CDS  |
| AS                   | 4320113           | ns                |        | UTI89_C4402 | -         | CDS  |
| S88                  | 4250212           | nc                |        | intergenic  |           |      |
| UTI89                | 4308604           | ns                |        | UTI89_C4423 | tatA      | CDS  |
| APEC                 | 4340877           | ns                |        | UTI89_C4424 | tatB      | CDS  |
| UTI89                | 4308923           | s                 |        | UTI89_C4424 | tatB      | CDS  |
| UTI89                | 4314651           | ns                |        | UTI89_C4430 | fadA      | CDS  |
| UTI89                | 4319323           | ns                |        | UTI89_C4433 | yigZ      | CDS  |
| S88                  | 4268259           | del               |        | intergenic  |           |      |
| APEC                 | 4353787           | nc                | rec    | intergenic  |           |      |
| APEC                 | 4353789           | nc                | rec    | intergenic  |           |      |
| APEC                 | 4353821           | nc                | rec    | intergenic  |           |      |
| APEC                 | 4353822           | ins               | rec    | intergenic  |           |      |
| APEC                 | 4353857           | nc                | rec    | intergenic  |           |      |
| APEC                 | 4353858           | nc                | rec    | intergenic  |           |      |
| APEC                 | 4353859           | ins               | rec    | intergenic  |           |      |
| APEC                 | 4353950           | nc                | rec    | intergenic  |           |      |
| APEC                 | 4353953           | nc                | rec    | intergenic  |           |      |
| APEC                 | 4353964           | nc                | rec    | intergenic  |           |      |
| APEC                 | 4353967           | nc                | rec    | intergenic  |           |      |
| APEC                 | 4354123           | ins               | rec    | intergenic  |           |      |
| APEC                 | 4354137           | nc                | rec    | intergenic  |           |      |
| APEC                 | 4354139           | nc                | rec    | intergenic  |           |      |
| APEC                 | 4355438           | nc                | rec    | intergenic  |           |      |
| APEC                 | 4355571           | nc                | rec    | intergenic  |           |      |
| APEC                 | 4355572           | nc                | rec    | intergenic  |           |      |
| AS                   | 4355826           | del-17            | rec    | intergenic  |           |      |

| lineage <sup>a</sup> | site <sup>b</sup> | mutation          |        | gene        | Gene name | Type |
|----------------------|-------------------|-------------------|--------|-------------|-----------|------|
|                      |                   | type <sup>c</sup> | recomb |             |           |      |
| S88                  | 4270376           | ins-17            |        | intergenic  |           |      |
| APEC                 | 4355937           | nc                | rec    | intergenic  |           |      |
| APEC                 | 4356118           | ns                | rec    | UTI89_C4441 | -         | CDS  |
| APEC                 | 4356170           | ns                | rec    | UTI89_C4441 | -         | CDS  |
| APEC                 | 4356233           | ins               | rec    | UTI89_C4441 | -         | CDS  |
| APEC                 | 4356241           | ins               | rec    | UTI89_C4441 | -         | CDS  |
| APEC                 | 4356402           | nc                | rec    | intergenic  |           |      |
| APEC                 | 4356991           | ins               | rec    | intergenic  |           |      |
| APEC                 | 4357100           | ins               | rec    | intergenic  |           |      |
| APEC                 | 4357194           | del               | rec    | intergenic  |           |      |
| APEC                 | 4357232           | nc                | rec    | intergenic  |           |      |
| APEC                 | 4357276           | nc                | rec    | intergenic  |           |      |
| APEC                 | 4357361           | nc                | rec    | intergenic  |           |      |
| APEC                 | 4357403           | nc                | rec    | intergenic  |           |      |
| APEC                 | 4357724           | nc                | rec    | intergenic  |           |      |
| APEC                 | 4357726           | nc                | rec    | intergenic  |           |      |
| APEC                 | 4357729           | nc                | rec    | intergenic  |           |      |
| S88                  | 4273205           | nc                | rec    | intergenic  |           |      |
| S88                  | 4273206           | nc                | rec    | intergenic  |           |      |
| S88                  | 4273208           | nc                | rec    | intergenic  |           |      |
| S88                  | 4273210           | nc                | rec    | intergenic  |           |      |
| S88                  | 4273214           | nc                | rec    | intergenic  |           |      |
| S88                  | 4273215           | nc                | rec    | intergenic  |           |      |
| UTI89                | 4326969           | nc                |        | intergenic  |           |      |
| APEC                 | 4358993           | ins               |        | intergenic  |           |      |
| APEC                 | 4358995           | nc                | rec    | intergenic  |           |      |
| APEC                 | 4358996           | nc                | rec    | intergenic  |           |      |
| APEC                 | 4358999           | nc                | rec    | intergenic  |           |      |
| APEC                 | 4359000           | nc                | rec    | intergenic  |           |      |
| APEC                 | 4359003           | nc                | rec    | intergenic  |           |      |
| APEC                 | 4359004           | nc                | rec    | intergenic  |           |      |
| APEC                 | 4359008           | nc                | rec    | intergenic  |           |      |
| APEC                 | 4359015           | ins               | rec    | intergenic  |           |      |
| APEC                 | 4359018           | nc                | rec    | intergenic  |           |      |
| APEC                 | 4359023           | nc                | rec    | intergenic  |           |      |
| APEC                 | 4359026           | nc                | rec    | intergenic  |           |      |
| APEC                 | 4359077           | s                 |        | UTI89_C4443 | mobB      | CDS  |
| APEC                 | 4359434           | s                 |        | UTI89_C4443 | mobB      | CDS  |
| S88                  | 4274195           | ns                |        | UTI89_C4444 | mobA      | CDS  |
| APEC                 | 4360017           | ns                |        | UTI89_C4444 | mobA      | CDS  |
| APEC                 | 4361508           | ns                |        | UTI89_C4446 | rdoA      | CDS  |

| lineage <sup>a</sup> | site <sup>b</sup> | mutation          |        | gene        | Gene name | Type |
|----------------------|-------------------|-------------------|--------|-------------|-----------|------|
|                      |                   | type <sup>c</sup> | recomb |             |           |      |
| APEC                 | 4362922           | s                 |        | UTI89_C4449 | yihF      | CDS  |
| S88                  | 4278408           | ns                |        | UTI89_C4450 | yihG      | CDS  |
| APEC                 | 4369802           | ns                |        | UTI89_C4455 | yihI      | CDS  |
| S88                  | 4284437           | ns                |        | UTI89_C4455 | yihI      | CDS  |
| APEC                 | 4378230           | nc                |        | intergenic  |           |      |
| APEC                 | 4378233           | nc                |        | intergenic  |           |      |
| APEC                 | 4382674           | ns                |        | UTI89_C4465 | -         | CDS  |
| APEC                 | 4387303           | s                 |        | UTI89_C4469 | yihX      | CDS  |
| AS                   | 4388080           | ns                |        | UTI89_C4470 | rbn       | CDS  |
| S88                  | 4302820           | ns                |        | UTI89_C4470 | rbn       | CDS  |
| AS                   | 4390745           | s                 |        | UTI89_C4473 | -         | CDS  |
| APEC                 | 4408714           | ns                |        | UTI89_C4490 | rhaT      | CDS  |
| APEC                 | 4410516           | s                 |        | UTI89_C4492 | -         | CDS  |
| UTI89                | 4381800           | s                 |        | UTI89_C4495 | cpxA      | CDS  |
| S88                  | 4332832           | ns                |        | UTI89_C4501 | sbp       | CDS  |
| APEC                 | 4424479           | ns                |        | UTI89_C4509 | glpX      | CDS  |
| APEC                 | 4428858           | ns                |        | UTI89_C4515 | menA      | CDS  |
| S88                  | 4344750           | s                 |        | UTI89_C4516 | hslU      | CDS  |
| AS                   | 4431638           | s                 |        | UTI89_C4518 | ftsN      | CDS  |
| S88                  | 4362194           | ns                |        | UTI89_C4530 | -         | CDS  |
| AS                   | 4448043           | ns                |        | UTI89_C4530 | -         | CDS  |
| UTI89                | 4418667           | ns                |        | UTI89_C4532 | katG      | CDS  |
| S88                  | 4372374           | ns                |        | UTI89_C4538 | ptsA      | CDS  |
| UTI89                | 4432590           | s                 |        | UTI89_C4545 | yijO      | CDS  |
| UTI89                | 4439821           | ns                |        | UTI89_C4549 | argC      | CDS  |
| UTI89                | 4451182           | s                 |        | UTI89_C4558 | yijC      | CDS  |
| APEC                 | 4488334           | nc                | rec    | intergenic  |           |      |
| APEC                 | 4488517           | nc                |        | intergenic  |           |      |
| AS                   | 4488585           | ins               | rec    | intergenic  |           |      |
| APEC                 | 4488591           | nc                |        | intergenic  |           |      |
| APEC                 | 4488668           | ins               | rec    | intergenic  |           |      |
| APEC                 | 4488776           | nc                | rec    | intergenic  |           |      |
| APEC                 | 4488784           | nc                | rec    | intergenic  |           |      |
| APEC                 | 4488805           | ins               | rec    | intergenic  |           |      |
| APEC                 | 4488823           | ins               | rec    | intergenic  |           |      |
| APEC                 | 4488826           | nc                | rec    | intergenic  |           |      |
| APEC                 | 4488832           | ins               | rec    | intergenic  |           |      |
| APEC                 | 4488841           | ins               | rec    | intergenic  |           |      |
| APEC                 | 4489637           | del               | rec    | UTI89_C4564 | -         | CDS  |
| APEC                 | 4489653           | ins               | rec    | UTI89_C4564 | -         | CDS  |
| APEC                 | 4489692           | s                 | rec    | UTI89_C4564 | -         | CDS  |

| lineage <sup>a</sup> | site <sup>b</sup> | mutation          |        | gene        | Gene name | Type |
|----------------------|-------------------|-------------------|--------|-------------|-----------|------|
|                      |                   | type <sup>c</sup> | recomb |             |           |      |
| APEC                 | 4489693           | ins-2             | rec    | UTI89_C4564 | -         | CDS  |
| APEC                 | 4489719           | ins               | rec    | UTI89_C4564 | -         | CDS  |
| APEC                 | 4489732           | s                 | rec    | UTI89_C4564 | -         | CDS  |
| APEC                 | 4489737           | ins               | rec    | UTI89_C4564 | -         | CDS  |
| APEC                 | 4489760           | ins-2             | rec    | UTI89_C4564 | -         | CDS  |
| APEC                 | 4489768           | ins               | rec    | UTI89_C4564 | -         | CDS  |
| APEC                 | 4489779           | del               | rec    | UTI89_C4564 | -         | CDS  |
| APEC                 | 4489788           | ns                | rec    | UTI89_C4564 | -         | CDS  |
| APEC                 | 4489955           | nc                | rec    | intergenic  |           |      |
| AS                   | 4542436           | ns                |        | UTI89_C4577 | metH      | CDS  |
| UTI89                | 4478703           | ns                |        | UTI89_C4584 | -         | CDS  |
| AS                   | 4551046           | s                 |        | UTI89_C4584 | -         | CDS  |
| UTI89                | 4481797           | s                 |        | UTI89_C4589 | -         | CDS  |
| AS                   | 4564653           | ns                |        | UTI89_C4599 | -         | CDS  |
| UTI89                | 4500681           | ns                |        | UTI89_C4607 | malM      | CDS  |
| AS                   | 4573791           | s                 |        | UTI89_C4609 | ubiC      | CDS  |
| UTI89                | 4505609           | s                 |        | UTI89_C4612 | dgkA      | CDS  |
| UTI89                | 4517245           | ns                |        | UTI89_C4623 | -         | CDS  |
| APEC                 | 4589910           | nc                |        | intergenic  |           |      |
| AS                   | 4599913           | s                 |        | UTI89_C4632 | -         | CDS  |
| UTI89                | 4532922           | ns                |        | UTI89_C4636 | -         | CDS  |
| S88                  | 4522336           | ns                |        | UTI89_C4638 | -         | CDS  |
| APEC                 | 4611463           | ns                |        | UTI89_C4642 | yjbQ      | CDS  |
| S88                  | 4534435           | s                 |        | UTI89_C4651 | yjcD      | CDS  |
| UTI89                | 4548569           | ns                |        | UTI89_C4651 | yjcD      | CDS  |
| UTI89                | 4563564           | nc                |        | intergenic  |           |      |
| UTI89                | 4575924           | s                 |        | UTI89_C4676 | -         | CDS  |
| UTI89                | 4587439           | ins               |        | intergenic  |           |      |
| AS                   | 4661878           | s                 |        | UTI89_C4688 | phnO      | CDS  |
| S88                  | 4579417           | s                 |        | UTI89_C4692 | phnK      | CDS  |
| S88                  | 4581025           | s                 |        | UTI89_C4694 | phnI      | CDS  |
| APEC                 | 4668268           | ns                |        | UTI89_C4697 | phnF      | CDS  |
| APEC                 | 4669476           | s                 |        | UTI89_C4698 | phnE      | CDS  |
| AS                   | 4678848           | s                 |        | UTI89_C4706 | basS      | CDS  |
| UTI89                | 4609416           | nc                |        | intergenic  |           |      |
| APEC                 | 4684017           | nc                |        | intergenic  |           |      |
| UTI89                | 4619731           | ns                |        | UTI89_C4716 | dcuB      | CDS  |
| UTI89                | 4624459           | ns                |        | UTI89_C4721 | yjdJ      | CDS  |
| AS                   | 4696911           | del               |        | UTI89_C4722 | -         | CDS  |
| S88                  | 4619220           | nc                |        | intergenic  |           |      |
| UTI89                | 4632763           | s                 |        | UTI89_C4730 | cadC      | CDS  |

| lineage <sup>a</sup> | site <sup>b</sup> | mutation          |        | gene        | Gene name | Type |
|----------------------|-------------------|-------------------|--------|-------------|-----------|------|
|                      |                   | type <sup>c</sup> | recomb |             |           |      |
| UTI89                | 4633784           | ns                |        | UTI89_C4730 | cadC      | CDS  |
| APEC                 | 4706724           | nc                |        | intergenic  |           |      |
| UTI89                | 4634670           | ins               |        | intergenic  |           |      |
| S88                  | 4621567           | nc                |        | intergenic  |           |      |
| S88                  | 4633514           | nc                |        | intergenic  |           |      |
| APEC/S88             | 4721636           | indel             |        | intergenic  |           |      |
| APEC                 | 4727253           | nc                |        | intergenic  |           |      |
| APEC                 | 4728234           | nc                |        | intergenic  |           |      |
| APEC                 | 4730261           | nc                |        | intergenic  |           |      |
| APEC/S88             | 4735685           | indel-9           |        | intergenic  |           |      |
| S88                  | 4657207           | nc                |        | intergenic  |           |      |
| S88                  | 4666747           | nc                |        | intergenic  |           |      |
| S88                  | 4671053           | nc                |        | intergenic  |           |      |
| AS                   | 4795635           | s                 |        | UTI89_C4759 | yjeP      | CDS  |
| AS                   | 4804012           | ns                |        | UTI89_C4769 | amiB      | CDS  |
| UTI89                | 4685229           | ns                |        | UTI89_C4786 | yjfC      | CDS  |
| S88                  | 4735953           | ns                |        | UTI89_C4786 | yjfC      | CDS  |
| S88                  | 4738501           | nc                |        | intergenic  |           |      |
| APEC                 | 4829115           | s                 |        | UTI89_C4794 | sgaB      | CDS  |
| AS                   | 4830815           | ns                |        | UTI89_C4797 | sgaU      | CDS  |
| APEC                 | 4847187           | s                 |        | UTI89_C4817 | cycA      | CDS  |
| UTI89                | 4724285           | ns                |        | UTI89_C4828 | ytfM      | CDS  |
| APEC                 | 4866034           | ns                |        | UTI89_C4833 | ytfR      | CDS  |
| APEC                 | 4875107           | s                 |        | UTI89_C4841 | nrdG      | CDS  |
| UTI89                | 4748256           | s                 |        | UTI89_C4847 | mgtA      | CDS  |
| APEC                 | 4888978           | ns                |        | UTI89_C4854 | -         | CDS  |
| UTI89                | 4754373           | ns                |        | UTI89_C4854 | -         | CDS  |
| APEC                 | 4890727           | ns                |        | UTI89_C4856 | -         | CDS  |
| APEC                 | 4890774           | ns                |        | UTI89_C4856 | -         | CDS  |
| APEC                 | 4893511           | ns                |        | UTI89_C4859 | yjgK      | CDS  |
| APEC                 | 4894875           | nc                |        | intergenic  |           |      |
| UTI89                | 4759932           | nc                |        | intergenic  |           |      |
| APEC                 | 4905231           | ins               |        | UTI89_C4870 | yjgR      | CDS  |
| APEC                 | 4906612           | ns                |        | UTI89_C4870 | yjgR      | CDS  |
| APEC                 | 4909847           | ns                |        | UTI89_C4873 | idnO      | CDS  |
| UTI89                | 4775219           | ns                |        | UTI89_C4874 | idnD      | CDS  |
| UTI89/AS             | 3318053           | ns                | rec    | UTI89_C4889 | papE      | CDS  |
| UTI89/AS             | 3318055           | s                 | rec    | UTI89_C4889 | papE      | CDS  |
| UTI89/AS             | 3318071           | ns                | rec    | UTI89_C4889 | papE      | CDS  |
| UTI89/AS             | 3318313           | ns                | rec    | UTI89_C4890 | papK      | CDS  |
| UTI89/AS             | 4791459           | s                 | rec    | UTI89_C4890 | papK      | CDS  |
| UTI89/AS             | 4791663           | s                 | rec    | UTI89_C4890 | papK      | CDS  |

| lineage <sup>a</sup> | site <sup>b</sup> | mutation          |        | gene        | Gene name   | Type |
|----------------------|-------------------|-------------------|--------|-------------|-------------|------|
|                      |                   | type <sup>c</sup> | recomb |             |             |      |
| S88                  | 3233390           | s                 |        | UTI89_C4890 | papK        | CDS  |
| UTI89/AS             | 4791756           | ns                | rec    | UTI89_C4890 | papK        | CDS  |
| UTI89/AS             | 4791765           | s                 | rec    | UTI89_C4890 | papK        | CDS  |
| UTI89/AS             | 4791780           | s                 | rec    | UTI89_C4890 | papK        | CDS  |
| UTI89/AS             | 4791788           | s                 | rec    | UTI89_C4890 | papK        | CDS  |
| UTI89/AS             | 4791821           | nc                | rec    | intergenic  |             |      |
| AS                   | 3319125           | s                 |        | UTI89_C4891 | papJ        | CDS  |
| UTI89                | 4793296           | s                 |        | UTI89_C4893 | papC        | CDS  |
| AS                   | 3320997           | ns                |        | UTI89_C4893 | papC        | CDS  |
| UTI89                | 4794478           | s                 |        | UTI89_C4893 | papC        | CDS  |
| UTI89                | 4794495           | ns                |        | UTI89_C4893 | papC        | CDS  |
| APEC                 | 3321695           | ns                |        | UTI89_C4893 | papC        | CDS  |
| UTI89                | 4795844           | s                 | rec    | UTI89_C4894 | papH        | CDS  |
| UTI89                | 4795847           | s                 | rec    | UTI89_C4894 | papH        | CDS  |
| UTI89                | 4795952           | s                 | rec    | UTI89_C4894 | papH        | CDS  |
| UTI89                | 3322862           | s                 | rec    | UTI89_C4894 | papH        | CDS  |
| UTI89                | 4795977           | ns                | rec    | UTI89_C4894 | papH        | CDS  |
| UTI89                | 4796117           | s                 | rec    | UTI89_C4894 | papH        | CDS  |
| UTI89                | 4796156           | s                 | rec    | UTI89_C4894 | papH        | CDS  |
| UTI89                | 4796177           | s                 | rec    | UTI89_C4894 | papH        | CDS  |
| UTI89                | 4796184           | ns                | rec    | UTI89_C4894 | papH        | CDS  |
| UTI89                | 4796198           | s                 | rec    | UTI89_C4894 | papH        | CDS  |
| UTI89                | 3323206           | ns                | rec    | UTI89_C4894 | papH        | CDS  |
| S88                  | 3238107           | nc                |        | intergenic  |             |      |
| UTI89                | 4796494           | nc                | rec    | UTI89_C4895 | papA(other) | CDS  |
| UTI89                | 4796512           | nc                | rec    | UTI89_C4895 | papA(other) | CDS  |
| S88                  | 4879115           | ns                | rec    | UTI89_C5004 | -           | CDS  |
| S88                  | 4879119           | ns                | rec    | UTI89_C5004 | -           | CDS  |
| S88                  | 4879144           | s                 | rec    | UTI89_C5004 | -           | CDS  |
| S88                  | 4879149           | ns                | rec    | UTI89_C5004 | -           | CDS  |
| S88                  | 4879153           | s                 | rec    | UTI89_C5004 | -           | CDS  |
| S88                  | 4879165           | s                 | rec    | UTI89_C5004 | -           | CDS  |
| S88                  | 4879189           | s                 | rec    | UTI89_C5004 | -           | CDS  |
| S88                  | 4879193           | ns                | rec    | UTI89_C5004 | -           | CDS  |
| S88                  | 4879228           | s                 | rec    | UTI89_C5004 | -           | CDS  |
| S88                  | 4879236           | ns                | rec    | UTI89_C5004 | -           | CDS  |
| S88                  | 4879240           | s                 | rec    | UTI89_C5004 | -           | CDS  |
| S88                  | 4879244           | ns                | rec    | UTI89_C5004 | -           | CDS  |
| S88                  | 4879246           | s                 | rec    | UTI89_C5004 | -           | CDS  |
| S88                  | 4879249           | s                 | rec    | UTI89_C5004 | -           | CDS  |
| S88                  | 4879256           | ns                | rec    | UTI89_C5004 | -           | CDS  |
| S88                  | 4879257           | ns                | rec    | UTI89_C5004 | -           | CDS  |

| lineage <sup>a</sup> | site <sup>b</sup> | mutation          |        | gene        | Gene name | Type |
|----------------------|-------------------|-------------------|--------|-------------|-----------|------|
|                      |                   | type <sup>c</sup> | recomb |             |           |      |
| S88                  | 4879272           | s                 | rec    | UTI89_C5004 | -         | CDS  |
| S88                  | 4879284           | s                 | rec    | UTI89_C5004 | -         | CDS  |
| S88                  | 4879290           | ns                | rec    | UTI89_C5004 | -         | CDS  |
| S88                  | 4879292           | ns                | rec    | UTI89_C5004 | -         | CDS  |
| S88                  | 4879312           | ns                | rec    | UTI89_C5004 | -         | CDS  |
| S88                  | 4879317           | s                 | rec    | UTI89_C5004 | -         | CDS  |
| S88                  | 4879474           | s                 | rec    | UTI89_C5005 | yjhS      | CDS  |
| S88                  | 4879479           | ns                | rec    | UTI89_C5005 | yjhS      | CDS  |
| S88                  | 4879492           | s                 | rec    | UTI89_C5005 | yjhS      | CDS  |
| S88                  | 4879504           | ns                | rec    | UTI89_C5005 | yjhS      | CDS  |
| S88                  | 4879506           | ns                | rec    | UTI89_C5005 | yjhS      | CDS  |
| S88                  | 4879607           | ns                | rec    | UTI89_C5005 | yjhS      | CDS  |
| S88                  | 4879704           | ns                | rec    | UTI89_C5005 | yjhS      | CDS  |
| S88                  | 4879708           | s                 | rec    | UTI89_C5005 | yjhS      | CDS  |
| S88                  | 4879768           | ns                | rec    | UTI89_C5005 | yjhS      | CDS  |
| S88                  | 4879799           | ns                | rec    | UTI89_C5005 | yjhS      | CDS  |
| S88                  | 4879813           | ns                | rec    | UTI89_C5005 | yjhS      | CDS  |
| S88                  | 4879960           | s                 | rec    | UTI89_C5005 | yjhS      | CDS  |
| S88                  | 4879974           | ns                | rec    | UTI89_C5005 | yjhS      | CDS  |
| S88                  | 4880009           | ns                | rec    | UTI89_C5005 | yjhS      | CDS  |
| S88                  | 4880047           | s                 | rec    | UTI89_C5005 | yjhS      | CDS  |
| S88                  | 4880074           | s                 | rec    | UTI89_C5005 | yjhS      | CDS  |
| S88                  | 4880079           | ns                | rec    | UTI89_C5005 | yjhS      | CDS  |
| S88                  | 4880098           | s                 | rec    | UTI89_C5005 | yjhS      | CDS  |
| S88                  | 4880119           | s                 | rec    | UTI89_C5005 | yjhS      | CDS  |
| S88                  | 4880250           | ns                | rec    | UTI89_C5005 | yjhS      | CDS  |
| S88                  | 4880266           | s                 | rec    | UTI89_C5005 | yjhS      | CDS  |
| S88                  | 4880301           | ns                | rec    | UTI89_C5005 | yjhS      | CDS  |
| S88                  | 4880318           | ns                | rec    | UTI89_C5005 | yjhS      | CDS  |
| S88                  | 4880332           | s                 | rec    | UTI89_C5005 | yjhS      | CDS  |
| S88                  | 4880519           | s                 | rec    | UTI89_C5006 | -         | CDS  |
| S88                  | 4880627           | s                 | rec    | UTI89_C5006 | -         | CDS  |
| S88                  | 4880671           | ns                | rec    | UTI89_C5006 | -         | CDS  |
| S88                  | 4880768           | s                 | rec    | UTI89_C5006 | -         | CDS  |
| S88                  | 4880771           | s                 | rec    | UTI89_C5006 | -         | CDS  |
| S88                  | 4880780           | ns                | rec    | UTI89_C5006 | -         | CDS  |
| S88                  | 4880783           | s                 | rec    | UTI89_C5006 | -         | CDS  |
| S88                  | 4880786           | s                 | rec    | UTI89_C5006 | -         | CDS  |
| S88                  | 4880818           | ns                | rec    | UTI89_C5006 | -         | CDS  |
| S88                  | 4880826           | ns                | rec    | UTI89_C5006 | -         | CDS  |
| S88                  | 4880972           | s                 | rec    | UTI89_C5006 | -         | CDS  |
| S88                  | 4881002           | s                 | rec    | UTI89_C5006 | -         | CDS  |
| S88                  | 4881017           | s                 | rec    | UTI89_C5006 | -         | CDS  |
| S88                  | 4881088           | ns                | rec    | UTI89_C5006 | -         | CDS  |
| S88                  | 4881107           | s                 | rec    | UTI89_C5006 | -         | CDS  |



| lineage <sup>a</sup> | site <sup>b</sup> | mutation          |        | gene        | Gene name | Type |
|----------------------|-------------------|-------------------|--------|-------------|-----------|------|
|                      |                   | type <sup>c</sup> | recomb |             |           |      |
| S88                  | 4881269           | s                 | rec    | UTI89_C5006 | -         | CDS  |
| S88                  | 4881365           | s                 | rec    | UTI89_C5006 | -         | CDS  |
| S88                  | 4881392           | s                 | rec    | UTI89_C5006 | -         | CDS  |
| S88                  | 4881455           | s                 | rec    | UTI89_C5006 | -         | CDS  |
| S88                  | 4881538           | ns                | rec    | UTI89_C5006 | -         | CDS  |
| S88                  | 4881554           | ns                | rec    | UTI89_C5006 | -         | CDS  |
| S88                  | 4881562           | ns                | rec    | UTI89_C5006 | -         | CDS  |
| S88                  | 4881702           | s                 | rec    | UTI89_C5007 | yjhA      | CDS  |
| S88                  | 4881810           | s                 | rec    | UTI89_C5007 | yjhA      | CDS  |
| S88                  | 4882268           | s                 | rec    | UTI89_C5007 | yjhA      | CDS  |
| S88                  | 4882324           | ns                | rec    | UTI89_C5007 | yjhA      | CDS  |
| S88                  | 4882431           | nc                | rec    | intergenic  |           |      |
| S88                  | 4882432           | nc                | rec    | intergenic  |           |      |
| S88                  | 4882446           | nc                | rec    | intergenic  |           |      |
| S88                  | 4882447           | nc                | rec    | intergenic  |           |      |
| S88                  | 4882449           | nc                | rec    | intergenic  |           |      |
| S88                  | 4882462           | nc                | rec    | intergenic  |           |      |
| S88                  | 4882477           | nc                | rec    | intergenic  |           |      |
| S88                  | 4882509           | nc                | rec    | intergenic  |           |      |
| S88                  | 4882538           | nc                | rec    | intergenic  |           |      |
| S88                  | 4882601           | nc                | rec    | intergenic  |           |      |
| S88                  | 4882626           | nc                | rec    | intergenic  |           |      |
| S88                  | 4882710           | nc                | rec    | intergenic  |           |      |
| S88                  | 4882721           | nc                | rec    | intergenic  |           |      |
| S88                  | 4882734           | nc                | rec    | intergenic  |           |      |
| S88                  | 4882737           | nc                | rec    | intergenic  |           |      |
| S88                  | 4882738           | nc                | rec    | intergenic  |           |      |
| S88                  | 4882797           | nc                | rec    | intergenic  |           |      |
| S88                  | 4882876           | nc                | rec    | intergenic  |           |      |
| S88                  | 4882898           | nc                | rec    | intergenic  |           |      |
| S88                  | 4882899           | nc                | rec    | intergenic  |           |      |
| S88                  | 4882900           | nc                | rec    | intergenic  |           |      |
| S88                  | 4882904           | nc                | rec    | intergenic  |           |      |
| S88                  | 4882919           | nc                | rec    | intergenic  |           |      |
| S88                  | 4882927           | nc                | rec    | intergenic  |           |      |
| S88                  | 4882938           | nc                | rec    | intergenic  |           |      |
| S88                  | 4882977           | nc                | rec    | intergenic  |           |      |
| S88                  | 4882988           | nc                | rec    | intergenic  |           |      |
| S88                  | 4883013           | nc                | rec    | intergenic  |           |      |
| S88                  | 4883048           | nc                | rec    | intergenic  |           |      |
| S88                  | 4883059           | nc                | rec    | intergenic  |           |      |
| S88                  | 4883067           | nc                | rec    | intergenic  |           |      |
| S88                  | 4883068           | nc                | rec    | intergenic  |           |      |
| S88                  | 4883085           | nc                | rec    | intergenic  |           |      |
| S88                  | 4883094           | nc                | rec    | intergenic  |           |      |

| lineage <sup>a</sup> | site <sup>b</sup> | mutation          |        | gene        | Gene name | Type |
|----------------------|-------------------|-------------------|--------|-------------|-----------|------|
|                      |                   | type <sup>c</sup> | recomb |             |           |      |
| S88                  | 4883124           | s                 | rec    | UTI89_C5008 | -         | CDS  |
| S88                  | 4883125           | s                 | rec    | UTI89_C5008 | -         | CDS  |
| S88                  | 4883129           | ns                | rec    | UTI89_C5008 | -         | CDS  |
| S88                  | 4883182           | ns                | rec    | UTI89_C5008 | -         | CDS  |
| S88                  | 4883199           | ns                | rec    | UTI89_C5008 | -         | CDS  |
| S88                  | 4883209           | ns                | rec    | UTI89_C5008 | -         | CDS  |
| S88                  | 4883229           | ns                | rec    | UTI89_C5008 | -         | CDS  |
| S88                  | 4883282           | ns                | rec    | UTI89_C5008 | -         | CDS  |
| S88                  | 4883319           | s                 | rec    | UTI89_C5008 | -         | CDS  |
| S88                  | 4883325           | ns                | rec    | UTI89_C5008 | -         | CDS  |
| S88                  | 4883365           | ns                | rec    | UTI89_C5008 | -         | CDS  |
| S88                  | 4883422           | ns                | rec    | UTI89_C5008 | -         | CDS  |
| S88                  | 4883432           | ns                | rec    | UTI89_C5008 | -         | CDS  |
| S88                  | 4883537           | nc                | rec    | intergenic  |           |      |
| S88                  | 4883546           | nc                | rec    | intergenic  |           |      |
| S88                  | 4883548           | nc                | rec    | intergenic  |           |      |
| S88                  | 4883589           | nc                | rec    | intergenic  |           |      |
| S88                  | 4883605           | nc                | rec    | intergenic  |           |      |
| S88                  | 4883616           | nc                | rec    | intergenic  |           |      |
| S88                  | 4883622           | nc                | rec    | intergenic  |           |      |
| S88                  | 4883624           | nc                | rec    | intergenic  |           |      |
| S88                  | 4883680           | nc                | rec    | intergenic  |           |      |
| S88                  | 4883712           | nc                | rec    | intergenic  |           |      |
| S88                  | 4883847           | s                 | rec    | UTI89_C5009 | fimB      | CDS  |
| S88                  | 4883868           | s                 | rec    | UTI89_C5009 | fimB      | CDS  |
| S88                  | 4883889           | s                 | rec    | UTI89_C5009 | fimB      | CDS  |
| S88                  | 4883892           | s                 | rec    | UTI89_C5009 | fimB      | CDS  |
| S88                  | 4883931           | s                 | rec    | UTI89_C5009 | fimB      | CDS  |
| S88                  | 4884031           | ns                | rec    | UTI89_C5009 | fimB      | CDS  |
| S88                  | 4884069           | s                 | rec    | UTI89_C5009 | fimB      | CDS  |
| S88                  | 4884072           | s                 | rec    | UTI89_C5009 | fimB      | CDS  |
| S88                  | 4884105           | s                 | rec    | UTI89_C5009 | fimB      | CDS  |
| S88                  | 4884120           | s                 | rec    | UTI89_C5009 | fimB      | CDS  |
| S88                  | 4884273           | s                 | rec    | UTI89_C5009 | fimB      | CDS  |
| S88                  | 4884475           | nc                | rec    | intergenic  |           |      |
| S88                  | 4884490           | nc                | rec    | intergenic  |           |      |
| S88                  | 4884594           | nc                | rec    | intergenic  |           |      |
| S88                  | 4884595           | nc                | rec    | intergenic  |           |      |
| S88                  | 4884602           | nc                | rec    | intergenic  |           |      |
| S88                  | 4884605           | nc                | rec    | intergenic  |           |      |
| S88                  | 4884691           | nc                | rec    | intergenic  |           |      |
| S88                  | 4884758           | nc                | rec    | intergenic  |           |      |
| S88                  | 4884911           | s                 | rec    | UTI89_C5010 | fimE      | CDS  |
| S88                  | 4885010           | s                 | rec    | UTI89_C5010 | fimE      | CDS  |
| S88                  | 4885175           | s                 | rec    | UTI89_C5010 | fimE      | CDS  |

| lineage <sup>a</sup> | site <sup>b</sup> | mutation          |        | gene        | Gene name | Type |
|----------------------|-------------------|-------------------|--------|-------------|-----------|------|
|                      |                   | type <sup>c</sup> | recomb |             |           |      |
| S88                  | 4885280           | s                 | rec    | UTI89_C5010 | fimE      | CDS  |
| S88                  | 4885295           | s                 | rec    | UTI89_C5010 | fimE      | CDS  |
| S88                  | 4885447           | ns                | rec    | UTI89_C5010 | fimE      | CDS  |
| S88                  | 4885450           | s                 | rec    | UTI89_C5010 | fimE      | CDS  |
| S88                  | 4885459           | nc                | rec    | intergenic  |           |      |
| S88                  | 4885467           | nc                | rec    | intergenic  |           |      |
| S88                  | 4885473           | nc                | rec    | intergenic  |           |      |
| S88                  | 4885515           | nc                | rec    | intergenic  |           |      |
| S88                  | 4885562           | nc                | rec    | intergenic  |           |      |
| S88                  | 4885595           | nc                | rec    | intergenic  |           |      |
| S88                  | 4885601           | nc                | rec    | intergenic  |           |      |
| S88                  | 4885639           | nc                | rec    | intergenic  |           |      |
| S88                  | 4885661           | nc                | rec    | intergenic  |           |      |
| S88                  | 4885662           | nc                | rec    | intergenic  |           |      |
| S88                  | 4885668           | nc                | rec    | intergenic  |           |      |
| S88                  | 4885697           | nc                | rec    | intergenic  |           |      |
| S88                  | 4885718           | nc                | rec    | intergenic  |           |      |
| S88                  | 4885721           | nc                | rec    | intergenic  |           |      |
| S88                  | 4885722           | nc                | rec    | intergenic  |           |      |
| S88                  | 4885736           | nc                | rec    | intergenic  |           |      |
| S88                  | 4885743           | nc                | rec    | intergenic  |           |      |
| S88                  | 4885746           | nc                | rec    | intergenic  |           |      |
| APEC                 | 4907674           | nc                |        | intergenic  |           |      |
| S88                  | 4885832           | nc                | rec    | intergenic  |           |      |
| S88                  | 4885868           | nc                | rec    | intergenic  |           |      |
| S88                  | 4885918           | nc                | rec    | intergenic  |           |      |
| S88                  | 4885928           | nc                | rec    | intergenic  |           |      |
| S88                  | 4885931           | nc                | rec    | intergenic  |           |      |
| S88                  | 4885949           | s                 | rec    | UTI89_C5011 | fimA      | CDS  |
| S88                  | 4886003           | ns                | rec    | UTI89_C5011 | fimA      | CDS  |
| S88                  | 4886108           | s                 | rec    | UTI89_C5011 | fimA      | CDS  |
| S88                  | 4886111           | s                 | rec    | UTI89_C5011 | fimA      | CDS  |
| S88                  | 4886126           | s                 | rec    | UTI89_C5011 | fimA      | CDS  |
| S88                  | 4886128           | ns                | rec    | UTI89_C5011 | fimA      | CDS  |
| S88                  | 4886130           | s                 | rec    | UTI89_C5011 | fimA      | CDS  |
| S88                  | 4886139           | ns                | rec    | UTI89_C5011 | fimA      | CDS  |
| S88                  | 4886197           | ns                | rec    | UTI89_C5011 | fimA      | CDS  |
| S88                  | 4886213           | s                 | rec    | UTI89_C5011 | fimA      | CDS  |
| S88                  | 4886234           | s                 | rec    | UTI89_C5011 | fimA      | CDS  |
| S88                  | 4886247           | ns                | rec    | UTI89_C5011 | fimA      | CDS  |
| S88                  | 4886261           | s                 | rec    | UTI89_C5011 | fimA      | CDS  |
| S88                  | 4886270           | s                 | rec    | UTI89_C5011 | fimA      | CDS  |
| S88                  | 4886300           | s                 | rec    | UTI89_C5011 | fimA      | CDS  |
| S88                  | 4886306           | s                 | rec    | UTI89_C5011 | fimA      | CDS  |
| S88                  | 4886315           | s                 | rec    | UTI89_C5011 | fimA      | CDS  |

| lineage <sup>a</sup> | site <sup>b</sup> | mutation          |        | gene        | Gene name | Type |
|----------------------|-------------------|-------------------|--------|-------------|-----------|------|
|                      |                   | type <sup>c</sup> | recomb |             |           |      |
| S88                  | 4886330           | s                 | rec    | UTI89_C5011 | fimA      | CDS  |
| S88                  | 4886367           | ns                | rec    | UTI89_C5011 | fimA      | CDS  |
| S88                  | 4886390           | s                 | rec    | UTI89_C5011 | fimA      | CDS  |
| S88                  | 4886419           | ns                | rec    | UTI89_C5011 | fimA      | CDS  |
| S88                  | 4886425           | ns                | rec    | UTI89_C5011 | fimA      | CDS  |
| S88                  | 4886429           | s                 | rec    | UTI89_C5011 | fimA      | CDS  |
| S88                  | 4886431           | ns                | rec    | UTI89_C5011 | fimA      | CDS  |
| S88                  | 4886432           | ns                | rec    | UTI89_C5011 | fimA      | CDS  |
| S88                  | 4886441           | s                 | rec    | UTI89_C5011 | fimA      | CDS  |
| S88                  | 4886574           | s                 | rec    | UTI89_C5012 | fimI      | CDS  |
| S88                  | 4886622           | s                 | rec    | UTI89_C5012 | fimI      | CDS  |
| S88                  | 4886658           | s                 | rec    | UTI89_C5012 | fimI      | CDS  |
| S88                  | 4886674           | ns                | rec    | UTI89_C5012 | fimI      | CDS  |
| S88                  | 4886764           | ns                | rec    | UTI89_C5012 | fimI      | CDS  |
| S88                  | 4886880           | s                 | rec    | UTI89_C5012 | fimI      | CDS  |
| S88                  | 4886952           | s                 | rec    | UTI89_C5012 | fimI      | CDS  |
| S88                  | 4887211           | ns                | rec    | UTI89_C5013 | fimC      | CDS  |
| S88                  | 4887228           | s                 | rec    | UTI89_C5013 | fimC      | CDS  |
| S88                  | 4887345           | s                 | rec    | UTI89_C5013 | fimC      | CDS  |
| S88                  | 4887372           | s                 | rec    | UTI89_C5013 | fimC      | CDS  |
| S88                  | 4887429           | s                 | rec    | UTI89_C5013 | fimC      | CDS  |
| S88                  | 4887492           | s                 | rec    | UTI89_C5013 | fimC      | CDS  |
| S88                  | 4887551           | ns                | rec    | UTI89_C5013 | fimC      | CDS  |
| S88                  | 4887582           | s                 | rec    | UTI89_C5013 | fimC      | CDS  |
| S88                  | 4887657           | s                 | rec    | UTI89_C5013 | fimC      | CDS  |
| S88                  | 4887711           | s                 | rec    | UTI89_C5013 | fimC      | CDS  |
| S88                  | 4887715           | ns                | rec    | UTI89_C5013 | fimC      | CDS  |
| S88                  | 4887754           | ns                | rec    | UTI89_C5013 | fimC      | CDS  |
| S88                  | 4887863           | nc                | rec    | intergenic  |           |      |
| S88                  | 4888014           | s                 | rec    | UTI89_C5014 | fimD      | CDS  |
| S88                  | 4888068           | s                 | rec    | UTI89_C5014 | fimD      | CDS  |
| S88                  | 4888074           | s                 | rec    | UTI89_C5014 | fimD      | CDS  |
| S88                  | 4888104           | s                 | rec    | UTI89_C5014 | fimD      | CDS  |
| S88                  | 4888158           | s                 | rec    | UTI89_C5014 | fimD      | CDS  |
| S88                  | 4888221           | s                 | rec    | UTI89_C5014 | fimD      | CDS  |
| S88                  | 4888260           | s                 | rec    | UTI89_C5014 | fimD      | CDS  |
| S88                  | 4888263           | s                 | rec    | UTI89_C5014 | fimD      | CDS  |
| S88                  | 4888362           | ns                | rec    | UTI89_C5014 | fimD      | CDS  |
| S88                  | 4888371           | s                 | rec    | UTI89_C5014 | fimD      | CDS  |
| S88                  | 4888458           | s                 | rec    | UTI89_C5014 | fimD      | CDS  |
| S88                  | 4888515           | s                 | rec    | UTI89_C5014 | fimD      | CDS  |
| S88                  | 4888569           | s                 | rec    | UTI89_C5014 | fimD      | CDS  |
| S88                  | 4888722           | s                 | rec    | UTI89_C5014 | fimD      | CDS  |
| S88                  | 4888896           | s                 | rec    | UTI89_C5014 | fimD      | CDS  |
| S88                  | 4888980           | s                 | rec    | UTI89_C5014 | fimD      | CDS  |

| lineage <sup>a</sup> | site <sup>b</sup> | mutation          |        | gene        | Gene name | Type |
|----------------------|-------------------|-------------------|--------|-------------|-----------|------|
|                      |                   | type <sup>c</sup> | recomb |             |           |      |
| S88                  | 4888989           | s                 | rec    | UTI89_C5014 | fimD      | CDS  |
| S88                  | 4889025           | s                 | rec    | UTI89_C5014 | fimD      | CDS  |
| S88                  | 4889040           | s                 | rec    | UTI89_C5014 | fimD      | CDS  |
| S88                  | 4889085           | s                 | rec    | UTI89_C5014 | fimD      | CDS  |
| S88                  | 4889145           | s                 | rec    | UTI89_C5014 | fimD      | CDS  |
| S88                  | 4889208           | s                 | rec    | UTI89_C5014 | fimD      | CDS  |
| S88                  | 4889304           | s                 | rec    | UTI89_C5014 | fimD      | CDS  |
| S88                  | 4889325           | s                 | rec    | UTI89_C5014 | fimD      | CDS  |
| S88                  | 4889331           | s                 | rec    | UTI89_C5014 | fimD      | CDS  |
| S88                  | 4889370           | s                 | rec    | UTI89_C5014 | fimD      | CDS  |
| S88                  | 4889373           | s                 | rec    | UTI89_C5014 | fimD      | CDS  |
| S88                  | 4889439           | s                 | rec    | UTI89_C5014 | fimD      | CDS  |
| S88                  | 4889613           | s                 | rec    | UTI89_C5014 | fimD      | CDS  |
| S88                  | 4889625           | s                 | rec    | UTI89_C5014 | fimD      | CDS  |
| S88                  | 4889636           | ns                | rec    | UTI89_C5014 | fimD      | CDS  |
| S88                  | 4889637           | ns                | rec    | UTI89_C5014 | fimD      | CDS  |
| S88                  | 4889703           | s                 | rec    | UTI89_C5014 | fimD      | CDS  |
| S88                  | 4889718           | s                 | rec    | UTI89_C5014 | fimD      | CDS  |
| S88                  | 4889730           | s                 | rec    | UTI89_C5014 | fimD      | CDS  |
| S88                  | 4889778           | s                 | rec    | UTI89_C5014 | fimD      | CDS  |
| S88                  | 4889822           | ns                | rec    | UTI89_C5014 | fimD      | CDS  |
| S88                  | 4889883           | s                 | rec    | UTI89_C5014 | fimD      | CDS  |
| S88                  | 4889895           | s                 | rec    | UTI89_C5014 | fimD      | CDS  |
| S88                  | 4889901           | s                 | rec    | UTI89_C5014 | fimD      | CDS  |
| S88                  | 4889961           | s                 | rec    | UTI89_C5014 | fimD      | CDS  |
| S88                  | 4890019           | ns                | rec    | UTI89_C5014 | fimD      | CDS  |
| S88                  | 4890066           | ns                | rec    | UTI89_C5014 | fimD      | CDS  |
| S88                  | 4890075           | s                 | rec    | UTI89_C5014 | fimD      | CDS  |
| S88                  | 4890123           | s                 | rec    | UTI89_C5014 | fimD      | CDS  |
| S88                  | 4890126           | s                 | rec    | UTI89_C5014 | fimD      | CDS  |
| S88                  | 4890144           | s                 | rec    | UTI89_C5014 | fimD      | CDS  |
| S88                  | 4890237           | s                 | rec    | UTI89_C5014 | fimD      | CDS  |
| S88                  | 4890309           | s                 | rec    | UTI89_C5014 | fimD      | CDS  |
| S88                  | 4890447           | s                 | rec    | UTI89_C5014 | fimD      | CDS  |
| S88                  | 4890591           | s                 | rec    | UTI89_C5015 | fimF      | CDS  |
| S88                  | 4890672           | s                 | rec    | UTI89_C5015 | fimF      | CDS  |
| S88                  | 4890768           | s                 | rec    | UTI89_C5015 | fimF      | CDS  |
| S88                  | 4890804           | s                 | rec    | UTI89_C5015 | fimF      | CDS  |
| S88                  | 4890822           | s                 | rec    | UTI89_C5015 | fimF      | CDS  |
| APEC                 | 4912752           | s                 |        | UTI89_C5015 | fimF      | CDS  |
| S88                  | 4890837           | s                 | rec    | UTI89_C5015 | fimF      | CDS  |
| S88                  | 4890927           | s                 | rec    | UTI89_C5015 | fimF      | CDS  |
| S88                  | 4890934           | ns                | rec    | UTI89_C5015 | fimF      | CDS  |
| S88                  | 4891003           | s                 | rec    | UTI89_C5015 | fimF      | CDS  |
| S88                  | 4891059           | s                 | rec    | UTI89_C5015 | fimF      | CDS  |

| lineage <sup>a</sup> | site <sup>b</sup> | mutation          |        | gene        | Gene name | Type |
|----------------------|-------------------|-------------------|--------|-------------|-----------|------|
|                      |                   | type <sup>c</sup> | recomb |             |           |      |
| S88                  | 4891132           | ns                | rec    | UTI89_C5016 | fimG      | CDS  |
| S88                  | 4891146           | ns                | rec    | UTI89_C5016 | fimG      | CDS  |
| S88                  | 4891153           | ns                | rec    | UTI89_C5016 | fimG      | CDS  |
| S88                  | 4891227           | s                 | rec    | UTI89_C5016 | fimG      | CDS  |
| S88                  | 4891281           | s                 | rec    | UTI89_C5016 | fimG      | CDS  |
| S88                  | 4891407           | s                 | rec    | UTI89_C5016 | fimG      | CDS  |
| S88                  | 4891469           | ns                | rec    | UTI89_C5016 | fimG      | CDS  |
| S88                  | 4891545           | s                 | rec    | UTI89_C5016 | fimG      | CDS  |
| S88                  | 4891554           | s                 | rec    | UTI89_C5016 | fimG      | CDS  |
| S88                  | 4891613           | nc                | rec    | intergenic  |           |      |
| S88                  | 4891616           | nc                | rec    | intergenic  |           |      |
| S88                  | 4891647           | ns                | rec    | UTI89_C5017 | fimH      | CDS  |
| S88                  | 4891658           | ns                | rec    | UTI89_C5017 | fimH      | CDS  |
| S88                  | 4891717           | s                 | rec    | UTI89_C5017 | fimH      | CDS  |
| S88                  | 4891723           | s                 | rec    | UTI89_C5017 | fimH      | CDS  |
| S88                  | 4891771           | s                 | rec    | UTI89_C5017 | fimH      | CDS  |
| S88                  | 4891801           | s                 | rec    | UTI89_C5017 | fimH      | CDS  |
| S88                  | 4891840           | s                 | rec    | UTI89_C5017 | fimH      | CDS  |
| S88                  | 4891855           | s                 | rec    | UTI89_C5017 | fimH      | CDS  |
| S88                  | 4891876           | s                 | rec    | UTI89_C5017 | fimH      | CDS  |
| UTI89                | 4913801           | ns                |        | UTI89_C5017 | fimH      | CDS  |
| S88                  | 4891902           | ns                | rec    | UTI89_C5017 | fimH      | CDS  |
| S88                  | 4891926           | ns                | rec    | UTI89_C5017 | fimH      | CDS  |
| S88                  | 4891942           | s                 | rec    | UTI89_C5017 | fimH      | CDS  |
| S88                  | 4891945           | s                 | rec    | UTI89_C5017 | fimH      | CDS  |
| S88                  | 4891948           | s                 | rec    | UTI89_C5017 | fimH      | CDS  |
| S88                  | 4891951           | s                 | rec    | UTI89_C5017 | fimH      | CDS  |
| S88                  | 4891957           | s                 | rec    | UTI89_C5017 | fimH      | CDS  |
| S88                  | 4892026           | s                 | rec    | UTI89_C5017 | fimH      | CDS  |
| S88                  | 4892041           | s                 | rec    | UTI89_C5017 | fimH      | CDS  |
| S88                  | 4892044           | s                 | rec    | UTI89_C5017 | fimH      | CDS  |
| S88                  | 4892049           | ns                | rec    | UTI89_C5017 | fimH      | CDS  |
| S88                  | 4892344           | s                 | rec    | UTI89_C5017 | fimH      | CDS  |
| S88                  | 4892347           | s                 | rec    | UTI89_C5017 | fimH      | CDS  |
| S88                  | 4894008           | nc                | rec    | intergenic  |           |      |
| S88                  | 4894164           | nc                | rec    | intergenic  |           |      |
| S88                  | 4894227           | nc                | rec    | intergenic  |           |      |
| S88                  | 4894337           | nc                | rec    | intergenic  |           |      |
| S88                  | 4894341           | nc                | rec    | intergenic  |           |      |
| S88                  | 4894345           | nc                | rec    | intergenic  |           |      |
| S88                  | 4894460           | s                 | rec    | UTI89_C5018 | uxuA      | CDS  |
| S88                  | 4894478           | s                 | rec    | UTI89_C5018 | uxuA      | CDS  |
| S88                  | 4894479           | s                 | rec    | UTI89_C5018 | uxuA      | CDS  |
| S88                  | 4894499           | s                 | rec    | UTI89_C5018 | uxuA      | CDS  |
| S88                  | 4894538           | s                 | rec    | UTI89_C5018 | uxuA      | CDS  |

| lineage <sup>a</sup> | site <sup>b</sup> | mutation          |        | gene        | Gene name | Type |
|----------------------|-------------------|-------------------|--------|-------------|-----------|------|
|                      |                   | type <sup>c</sup> | recomb |             |           |      |
| S88                  | 4894550           | s                 | rec    | UTI89_C5018 | uxuA      | CDS  |
| S88                  | 4894574           | s                 | rec    | UTI89_C5018 | uxuA      | CDS  |
| S88                  | 4894583           | s                 | rec    | UTI89_C5018 | uxuA      | CDS  |
| S88                  | 4894634           | s                 | rec    | UTI89_C5018 | uxuA      | CDS  |
| S88                  | 4894652           | s                 | rec    | UTI89_C5018 | uxuA      | CDS  |
| S88                  | 4894676           | s                 | rec    | UTI89_C5018 | uxuA      | CDS  |
| S88                  | 4894814           | s                 | rec    | UTI89_C5018 | uxuA      | CDS  |
| S88                  | 4894817           | s                 | rec    | UTI89_C5018 | uxuA      | CDS  |
| S88                  | 4894823           | s                 | rec    | UTI89_C5018 | uxuA      | CDS  |
| S88                  | 4894862           | s                 | rec    | UTI89_C5018 | uxuA      | CDS  |
| S88                  | 4894934           | s                 | rec    | UTI89_C5018 | uxuA      | CDS  |
| S88                  | 4894937           | s                 | rec    | UTI89_C5018 | uxuA      | CDS  |
| S88                  | 4894952           | s                 | rec    | UTI89_C5018 | uxuA      | CDS  |
| S88                  | 4894985           | s                 | rec    | UTI89_C5018 | uxuA      | CDS  |
| S88                  | 4895024           | s                 | rec    | UTI89_C5018 | uxuA      | CDS  |
| S88                  | 4895039           | s                 | rec    | UTI89_C5018 | uxuA      | CDS  |
| S88                  | 4895045           | s                 | rec    | UTI89_C5018 | uxuA      | CDS  |
| S88                  | 4895072           | s                 | rec    | UTI89_C5018 | uxuA      | CDS  |
| S88                  | 4895081           | s                 | rec    | UTI89_C5018 | uxuA      | CDS  |
| S88                  | 4895105           | s                 | rec    | UTI89_C5018 | uxuA      | CDS  |
| S88                  | 4895108           | s                 | rec    | UTI89_C5018 | uxuA      | CDS  |
| S88                  | 4895135           | s                 | rec    | UTI89_C5018 | uxuA      | CDS  |
| S88                  | 4895174           | s                 | rec    | UTI89_C5018 | uxuA      | CDS  |
| S88                  | 4895483           | s                 | rec    | UTI89_C5018 | uxuA      | CDS  |
| S88                  | 4895486           | s                 | rec    | UTI89_C5018 | uxuA      | CDS  |
| S88                  | 4895576           | nc                | rec    | intergenic  |           |      |
| S88                  | 4895758           | s                 | rec    | UTI89_C5019 | uxuB      | CDS  |
| S88                  | 4895776           | s                 | rec    | UTI89_C5019 | uxuB      | CDS  |
| S88                  | 4895797           | s                 | rec    | UTI89_C5019 | uxuB      | CDS  |
| S88                  | 4895959           | s                 | rec    | UTI89_C5019 | uxuB      | CDS  |
| S88                  | 4895974           | s                 | rec    | UTI89_C5019 | uxuB      | CDS  |
| S88                  | 4896010           | s                 | rec    | UTI89_C5019 | uxuB      | CDS  |
| S88                  | 4896073           | s                 | rec    | UTI89_C5019 | uxuB      | CDS  |
| S88                  | 4896109           | s                 | rec    | UTI89_C5019 | uxuB      | CDS  |
| S88                  | 4896151           | s                 | rec    | UTI89_C5019 | uxuB      | CDS  |
| S88                  | 4896158           | s                 | rec    | UTI89_C5019 | uxuB      | CDS  |
| S88                  | 4896211           | s                 | rec    | UTI89_C5019 | uxuB      | CDS  |
| S88                  | 4896244           | s                 | rec    | UTI89_C5019 | uxuB      | CDS  |
| S88                  | 4896247           | s                 | rec    | UTI89_C5019 | uxuB      | CDS  |
| S88                  | 4896250           | s                 | rec    | UTI89_C5019 | uxuB      | CDS  |
| S88                  | 4896253           | s                 | rec    | UTI89_C5019 | uxuB      | CDS  |
| S88                  | 4896264           | ns                | rec    | UTI89_C5019 | uxuB      | CDS  |
| S88                  | 4896280           | s                 | rec    | UTI89_C5019 | uxuB      | CDS  |
| S88                  | 4896283           | s                 | rec    | UTI89_C5019 | uxuB      | CDS  |
| S88                  | 4896297           | ns                | rec    | UTI89_C5019 | uxuB      | CDS  |

| lineage <sup>a</sup> | site <sup>b</sup> | mutation          |        | gene        | Gene name | Type |
|----------------------|-------------------|-------------------|--------|-------------|-----------|------|
|                      |                   | type <sup>c</sup> | recomb |             |           |      |
| S88                  | 4896301           | s                 | rec    | UTI89_C5019 | uxuB      | CDS  |
| S88                  | 4896313           | s                 | rec    | UTI89_C5019 | uxuB      | CDS  |
| S88                  | 4896388           | s                 | rec    | UTI89_C5019 | uxuB      | CDS  |
| S88                  | 4896436           | s                 | rec    | UTI89_C5019 | uxuB      | CDS  |
| S88                  | 4896448           | s                 | rec    | UTI89_C5019 | uxuB      | CDS  |
| S88                  | 4896463           | s                 | rec    | UTI89_C5019 | uxuB      | CDS  |
| S88                  | 4896481           | s                 | rec    | UTI89_C5019 | uxuB      | CDS  |
| S88                  | 4896487           | s                 | rec    | UTI89_C5019 | uxuB      | CDS  |
| S88                  | 4896493           | s                 | rec    | UTI89_C5019 | uxuB      | CDS  |
| S88                  | 4896499           | s                 | rec    | UTI89_C5019 | uxuB      | CDS  |
| S88                  | 4896502           | s                 | rec    | UTI89_C5019 | uxuB      | CDS  |
| S88                  | 4896508           | s                 | rec    | UTI89_C5019 | uxuB      | CDS  |
| S88                  | 4896618           | ns                | rec    | UTI89_C5019 | uxuB      | CDS  |
| S88                  | 4896766           | s                 | rec    | UTI89_C5019 | uxuB      | CDS  |
| S88                  | 4896835           | s                 | rec    | UTI89_C5019 | uxuB      | CDS  |
| S88                  | 4896865           | s                 | rec    | UTI89_C5019 | uxuB      | CDS  |
| S88                  | 4896922           | s                 | rec    | UTI89_C5019 | uxuB      | CDS  |
| S88                  | 4896932           | ns                | rec    | UTI89_C5019 | uxuB      | CDS  |
| S88                  | 4896937           | s                 | rec    | UTI89_C5019 | uxuB      | CDS  |
| S88                  | 4896952           | s                 | rec    | UTI89_C5019 | uxuB      | CDS  |
| S88                  | 4896970           | s                 | rec    | UTI89_C5019 | uxuB      | CDS  |
| S88                  | 4896988           | s                 | rec    | UTI89_C5019 | uxuB      | CDS  |
| S88                  | 4896994           | s                 | rec    | UTI89_C5019 | uxuB      | CDS  |
| S88                  | 4897009           | s                 | rec    | UTI89_C5019 | uxuB      | CDS  |
| S88                  | 4897030           | s                 | rec    | UTI89_C5019 | uxuB      | CDS  |
| S88                  | 4897033           | s                 | rec    | UTI89_C5019 | uxuB      | CDS  |
| S88                  | 4897078           | s                 | rec    | UTI89_C5019 | uxuB      | CDS  |
| S88                  | 4897081           | s                 | rec    | UTI89_C5019 | uxuB      | CDS  |
| S88                  | 4897154           | nc                | rec    | intergenic  |           |      |
| S88                  | 4897204           | nc                | rec    | intergenic  |           |      |
| S88                  | 4897230           | nc                | rec    | intergenic  |           |      |
| S88                  | 4897236           | nc                | rec    | intergenic  |           |      |
| S88                  | 4897239           | nc                | rec    | intergenic  |           |      |
| S88                  | 4897263           | nc                | rec    | intergenic  |           |      |
| S88                  | 4897291           | nc                | rec    | intergenic  |           |      |
| S88                  | 4897430           | s                 | rec    | UTI89_C5020 | uxuR      | CDS  |
| S88                  | 4897526           | s                 | rec    | UTI89_C5020 | uxuR      | CDS  |
| S88                  | 4897535           | s                 | rec    | UTI89_C5020 | uxuR      | CDS  |
| S88                  | 4897572           | ns                | rec    | UTI89_C5020 | uxuR      | CDS  |
| S88                  | 4897581           | ns                | rec    | UTI89_C5020 | uxuR      | CDS  |
| S88                  | 4897598           | s                 | rec    | UTI89_C5020 | uxuR      | CDS  |
| S88                  | 4897601           | s                 | rec    | UTI89_C5020 | uxuR      | CDS  |
| S88                  | 4897607           | s                 | rec    | UTI89_C5020 | uxuR      | CDS  |
| S88                  | 4897634           | s                 | rec    | UTI89_C5020 | uxuR      | CDS  |
| S88                  | 4897658           | s                 | rec    | UTI89_C5020 | uxuR      | CDS  |



| lineage <sup>a</sup> | site <sup>b</sup> | mutation          |        | gene        | Gene name | Type |
|----------------------|-------------------|-------------------|--------|-------------|-----------|------|
|                      |                   | type <sup>c</sup> | recomb |             |           |      |
| S88                  | 4897661           | s                 | rec    | UTI89_C5020 | uxuR      | CDS  |
| S88                  | 4897670           | s                 | rec    | UTI89_C5020 | uxuR      | CDS  |
| S88                  | 4897671           | s                 | rec    | UTI89_C5020 | uxuR      | CDS  |
| S88                  | 4897706           | s                 | rec    | UTI89_C5020 | uxuR      | CDS  |
| S88                  | 4897707           | ns                | rec    | UTI89_C5020 | uxuR      | CDS  |
| S88                  | 4897772           | s                 | rec    | UTI89_C5020 | uxuR      | CDS  |
| S88                  | 4897790           | s                 | rec    | UTI89_C5020 | uxuR      | CDS  |
| S88                  | 4898003           | s                 | rec    | UTI89_C5020 | uxuR      | CDS  |
| S88                  | 4898006           | s                 | rec    | UTI89_C5020 | uxuR      | CDS  |
| S88                  | 4898009           | s                 | rec    | UTI89_C5020 | uxuR      | CDS  |
| S88                  | 4898015           | s                 | rec    | UTI89_C5020 | uxuR      | CDS  |
| S88                  | 4898018           | s                 | rec    | UTI89_C5020 | uxuR      | CDS  |
| S88                  | 4898019           | s                 | rec    | UTI89_C5020 | uxuR      | CDS  |
| S88                  | 4898027           | s                 | rec    | UTI89_C5020 | uxuR      | CDS  |
| S88                  | 4898033           | s                 | rec    | UTI89_C5020 | uxuR      | CDS  |
| S88                  | 4898036           | s                 | rec    | UTI89_C5020 | uxuR      | CDS  |
| S88                  | 4898042           | s                 | rec    | UTI89_C5020 | uxuR      | CDS  |
| S88                  | 4898045           | s                 | rec    | UTI89_C5020 | uxuR      | CDS  |
| S88                  | 4898048           | s                 | rec    | UTI89_C5020 | uxuR      | CDS  |
| S88                  | 4898054           | s                 | rec    | UTI89_C5020 | uxuR      | CDS  |
| S88                  | 4898057           | s                 | rec    | UTI89_C5020 | uxuR      | CDS  |
| S88                  | 4899760           | ns                | rec    | UTI89_C5021 | yjiD      | CDS  |
| S88                  | 4899761           | ns                | rec    | UTI89_C5021 | yjiD      | CDS  |
| S88                  | 4899766           | ns                | rec    | UTI89_C5021 | yjiD      | CDS  |
| S88                  | 4899768           | ns                | rec    | UTI89_C5021 | yjiD      | CDS  |
| S88                  | 4899771           | s                 | rec    | UTI89_C5021 | yjiD      | CDS  |
| S88                  | 4899782           | ns                | rec    | UTI89_C5021 | yjiD      | CDS  |
| S88                  | 4899784           | ns                | rec    | UTI89_C5021 | yjiD      | CDS  |
| S88                  | 4899789           | s                 | rec    | UTI89_C5021 | yjiD      | CDS  |
| S88                  | 4899792           | s                 | rec    | UTI89_C5021 | yjiD      | CDS  |
| S88                  | 4899795           | ns                | rec    | UTI89_C5021 | yjiD      | CDS  |
| S88                  | 4899800           | ns                | rec    | UTI89_C5021 | yjiD      | CDS  |
| S88                  | 4899811           | ns                | rec    | UTI89_C5021 | yjiD      | CDS  |
| S88                  | 4899813           | ns                | rec    | UTI89_C5021 | yjiD      | CDS  |
| S88                  | 4899816           | s                 | rec    | UTI89_C5021 | yjiD      | CDS  |
| S88                  | 4899817           | ns                | rec    | UTI89_C5021 | yjiD      | CDS  |
| S88                  | 4899822           | s                 | rec    | UTI89_C5021 | yjiD      | CDS  |
| S88                  | 4899823           | ns                | rec    | UTI89_C5021 | yjiD      | CDS  |
| S88                  | 4899825           | ns                | rec    | UTI89_C5021 | yjiD      | CDS  |
| S88                  | 4899832           | ns                | rec    | UTI89_C5021 | yjiD      | CDS  |
| S88                  | 4899834           | ns                | rec    | UTI89_C5021 | yjiD      | CDS  |
| S88                  | 4899835           | ns                | rec    | UTI89_C5021 | yjiD      | CDS  |
| S88                  | 4899836           | ns                | rec    | UTI89_C5021 | yjiD      | CDS  |
| S88                  | 4899837           | ns                | rec    | UTI89_C5021 | yjiD      | CDS  |
| S88                  | 4899845           | ns                | rec    | UTI89_C5021 | yjiD      | CDS  |

| lineage <sup>a</sup> | site <sup>b</sup> | mutation          |        | gene        | Gene name | Type |
|----------------------|-------------------|-------------------|--------|-------------|-----------|------|
|                      |                   | type <sup>c</sup> | recomb |             |           |      |
| S88                  | 4899852           | s                 | rec    | UTI89_C5021 | yjiD      | CDS  |
| S88                  | 4899858           | s                 | rec    | UTI89_C5021 | yjiD      | CDS  |
| S88                  | 4899859           | ns                | rec    | UTI89_C5021 | yjiD      | CDS  |
| S88                  | 4899861           | ns                | rec    | UTI89_C5021 | yjiD      | CDS  |
| S88                  | 4899862           | s                 | rec    | UTI89_C5021 | yjiD      | CDS  |
| S88                  | 4899867           | s                 | rec    | UTI89_C5021 | yjiD      | CDS  |
| S88                  | 4899868           | ns                | rec    | UTI89_C5021 | yjiD      | CDS  |
| S88                  | 4899869           | ns                | rec    | UTI89_C5021 | yjiD      | CDS  |
| S88                  | 4899891           | s                 | rec    | UTI89_C5021 | yjiD      | CDS  |
| S88                  | 4899902           | ns                | rec    | UTI89_C5021 | yjiD      | CDS  |
| S88                  | 4899909           | s                 | rec    | UTI89_C5021 | yjiD      | CDS  |
| S88                  | 4899921           | s                 | rec    | UTI89_C5021 | yjiD      | CDS  |
| S88                  | 4899923           | ns                | rec    | UTI89_C5021 | yjiD      | CDS  |
| S88                  | 4899933           | s                 | rec    | UTI89_C5021 | yjiD      | CDS  |
| S88                  | 4899945           | s                 | rec    | UTI89_C5021 | yjiD      | CDS  |
| S88                  | 4899949           | s                 | rec    | UTI89_C5021 | yjiD      | CDS  |
| S88                  | 4899951           | s                 | rec    | UTI89_C5021 | yjiD      | CDS  |
| UTI89                | 4919522           | s                 |        | UTI89_C5021 | yjiD      | CDS  |
| S88                  | 4899957           | s                 | rec    | UTI89_C5021 | yjiD      | CDS  |
| S88                  | 4899960           | s                 | rec    | UTI89_C5021 | yjiD      | CDS  |
| S88                  | 4899963           | s                 | rec    | UTI89_C5021 | yjiD      | CDS  |
| S88                  | 4899981           | s                 | rec    | UTI89_C5021 | yjiD      | CDS  |
| S88                  | 4899990           | s                 | rec    | UTI89_C5021 | yjiD      | CDS  |
| S88                  | 4900014           | s                 | rec    | UTI89_C5021 | yjiD      | CDS  |
| S88                  | 4900017           | s                 | rec    | UTI89_C5021 | yjiD      | CDS  |
| S88                  | 4900018           | ns                | rec    | UTI89_C5021 | yjiD      | CDS  |
| S88                  | 4900024           | ns                | rec    | UTI89_C5021 | yjiD      | CDS  |
| S88                  | 4900025           | ns                | rec    | UTI89_C5021 | yjiD      | CDS  |
| S88                  | 4900027           | s                 | rec    | UTI89_C5021 | yjiD      | CDS  |
| S88                  | 4900032           | s                 | rec    | UTI89_C5021 | yjiD      | CDS  |
| S88                  | 4900035           | s                 | rec    | UTI89_C5021 | yjiD      | CDS  |
| S88                  | 4900038           | s                 | rec    | UTI89_C5021 | yjiD      | CDS  |
| S88                  | 4900041           | s                 | rec    | UTI89_C5021 | yjiD      | CDS  |
| S88                  | 4900047           | ns                | rec    | UTI89_C5021 | yjiD      | CDS  |
| S88                  | 4900062           | s                 | rec    | UTI89_C5021 | yjiD      | CDS  |
| S88                  | 4900068           | s                 | rec    | UTI89_C5021 | yjiD      | CDS  |
| S88                  | 4900083           | s                 | rec    | UTI89_C5021 | yjiD      | CDS  |
| S88                  | 4900139           | s                 | rec    | UTI89_C5037 | yjiE      | CDS  |
| S88                  | 4900193           | s                 | rec    | UTI89_C5037 | yjiE      | CDS  |
| S88                  | 4900205           | s                 | rec    | UTI89_C5037 | yjiE      | CDS  |
| S88                  | 4900214           | s                 | rec    | UTI89_C5037 | yjiE      | CDS  |
| S88                  | 4900250           | s                 | rec    | UTI89_C5037 | yjiE      | CDS  |
| S88                  | 4900253           | s                 | rec    | UTI89_C5037 | yjiE      | CDS  |
| S88                  | 4900343           | s                 | rec    | UTI89_C5037 | yjiE      | CDS  |
| S88                  | 4900388           | s                 | rec    | UTI89_C5037 | yjiE      | CDS  |

| lineage <sup>a</sup> | site <sup>b</sup> | mutation          |        | gene        | Gene name | Type |
|----------------------|-------------------|-------------------|--------|-------------|-----------|------|
|                      |                   | type <sup>c</sup> | recomb |             |           |      |
| S88                  | 4900481           | s                 | rec    | UTI89_C5037 | yjiE      | CDS  |
| S88                  | 4900505           | s                 | rec    | UTI89_C5037 | yjiE      | CDS  |
| S88                  | 4900514           | s                 | rec    | UTI89_C5037 | yjiE      | CDS  |
| S88                  | 4900634           | s                 | rec    | UTI89_C5037 | yjiE      | CDS  |
| S88                  | 4900727           | s                 | rec    | UTI89_C5037 | yjiE      | CDS  |
| S88                  | 4900775           | s                 | rec    | UTI89_C5037 | yjiE      | CDS  |
| S88                  | 4900820           | s                 | rec    | UTI89_C5037 | yjiE      | CDS  |
| S88                  | 4900898           | nc                | rec    | intergenic  |           |      |
| S88                  | 4900901           | nc                | rec    | intergenic  |           |      |
| S88                  | 4900961           | nc                | rec    | intergenic  |           |      |
| S88                  | 4900979           | nc                | rec    | intergenic  |           |      |
| S88                  | 4900998           | nc                | rec    | intergenic  |           |      |
| S88                  | 4901109           | s                 | rec    | UTI89_C5038 | iadA      | CDS  |
| S88                  | 4901130           | s                 | rec    | UTI89_C5038 | iadA      | CDS  |
| S88                  | 4901325           | s                 | rec    | UTI89_C5038 | iadA      | CDS  |
| S88                  | 4901352           | s                 | rec    | UTI89_C5038 | iadA      | CDS  |
| S88                  | 4901388           | s                 | rec    | UTI89_C5038 | iadA      | CDS  |
| S88                  | 4901436           | s                 | rec    | UTI89_C5038 | iadA      | CDS  |
| S88                  | 4901460           | s                 | rec    | UTI89_C5038 | iadA      | CDS  |
| S88                  | 4901529           | s                 | rec    | UTI89_C5038 | iadA      | CDS  |
| S88                  | 4901542           | ns                | rec    | UTI89_C5038 | iadA      | CDS  |
| S88                  | 4901547           | s                 | rec    | UTI89_C5038 | iadA      | CDS  |
| S88                  | 4901553           | s                 | rec    | UTI89_C5038 | iadA      | CDS  |
| S88                  | 4901624           | ns                | rec    | UTI89_C5038 | iadA      | CDS  |
| S88                  | 4901670           | s                 | rec    | UTI89_C5038 | iadA      | CDS  |
| S88                  | 4901700           | s                 | rec    | UTI89_C5038 | iadA      | CDS  |
| S88                  | 4901898           | s                 | rec    | UTI89_C5038 | iadA      | CDS  |
| S88                  | 4901961           | s                 | rec    | UTI89_C5038 | iadA      | CDS  |
| S88                  | 4901973           | s                 | rec    | UTI89_C5038 | iadA      | CDS  |
| S88                  | 4902014           | s                 | rec    | UTI89_C5038 | iadA      | CDS  |
| S88                  | 4902051           | s                 | rec    | UTI89_C5038 | iadA      | CDS  |
| S88                  | 4902072           | s                 | rec    | UTI89_C5038 | iadA      | CDS  |
| S88                  | 4902156           | s                 | rec    | UTI89_C5038 | iadA      | CDS  |
| S88                  | 4902159           | s                 | rec    | UTI89_C5038 | iadA      | CDS  |
| S88                  | 4902171           | s                 | rec    | UTI89_C5038 | iadA      | CDS  |
| S88                  | 4902191           | ns                | rec    | UTI89_C5038 | iadA      | CDS  |
| S88                  | 4902206           | ns                | rec    | UTI89_C5038 | iadA      | CDS  |
| S88                  | 4902266           | ns                | rec    | UTI89_C5038 | iadA      | CDS  |
| S88                  | 4902360           | s                 | rec    | UTI89_C5039 | yjiG      | CDS  |
| S88                  | 4902462           | s                 | rec    | UTI89_C5039 | yjiG      | CDS  |
| S88                  | 4902483           | s                 | rec    | UTI89_C5039 | yjiG      | CDS  |
| S88                  | 4902519           | s                 | rec    | UTI89_C5039 | yjiG      | CDS  |
| S88                  | 4902525           | s                 | rec    | UTI89_C5039 | yjiG      | CDS  |
| S88                  | 4902558           | s                 | rec    | UTI89_C5039 | yjiG      | CDS  |
| S88                  | 4902582           | s                 | rec    | UTI89_C5039 | yjiG      | CDS  |

| lineage <sup>a</sup> | site <sup>b</sup> | mutation          |        | gene        | Gene name | Type |
|----------------------|-------------------|-------------------|--------|-------------|-----------|------|
|                      |                   | type <sup>c</sup> | recomb |             |           |      |
| S88                  | 4902597           | s                 | rec    | UTI89_C5039 | yjiG      | CDS  |
| S88                  | 4902618           | s                 | rec    | UTI89_C5039 | yjiG      | CDS  |
| S88                  | 4902636           | s                 | rec    | UTI89_C5039 | yjiG      | CDS  |
| S88                  | 4902648           | s                 | rec    | UTI89_C5039 | yjiG      | CDS  |
| S88                  | 4902675           | s                 | rec    | UTI89_C5039 | yjiG      | CDS  |
| S88                  | 4902681           | s                 | rec    | UTI89_C5039 | yjiG      | CDS  |
| S88                  | 4902711           | s                 | rec    | UTI89_C5039 | yjiG      | CDS  |
| S88                  | 4902735           | s                 | rec    | UTI89_C5039 | yjiG      | CDS  |
| S88                  | 4902845           | s                 | rec    | UTI89_C5040 | yjiH      | CDS  |
| S88                  | 4902917           | s                 | rec    | UTI89_C5040 | yjiH      | CDS  |
| S88                  | 4902941           | s                 | rec    | UTI89_C5040 | yjiH      | CDS  |
| S88                  | 4902950           | s                 | rec    | UTI89_C5040 | yjiH      | CDS  |
| S88                  | 4902962           | s                 | rec    | UTI89_C5040 | yjiH      | CDS  |
| S88                  | 4902977           | s                 | rec    | UTI89_C5040 | yjiH      | CDS  |
| S88                  | 4902992           | s                 | rec    | UTI89_C5040 | yjiH      | CDS  |
| S88                  | 4903007           | s                 | rec    | UTI89_C5040 | yjiH      | CDS  |
| S88                  | 4903037           | s                 | rec    | UTI89_C5040 | yjiH      | CDS  |
| S88                  | 4903049           | s                 | rec    | UTI89_C5040 | yjiH      | CDS  |
| S88                  | 4903052           | s                 | rec    | UTI89_C5040 | yjiH      | CDS  |
| S88                  | 4903058           | s                 | rec    | UTI89_C5040 | yjiH      | CDS  |
| S88                  | 4903088           | s                 | rec    | UTI89_C5040 | yjiH      | CDS  |
| S88                  | 4903115           | s                 | rec    | UTI89_C5040 | yjiH      | CDS  |
| S88                  | 4903139           | s                 | rec    | UTI89_C5040 | yjiH      | CDS  |
| S88                  | 4903142           | s                 | rec    | UTI89_C5040 | yjiH      | CDS  |
| S88                  | 4903148           | s                 | rec    | UTI89_C5040 | yjiH      | CDS  |
| S88                  | 4903163           | s                 | rec    | UTI89_C5040 | yjiH      | CDS  |
| S88                  | 4903172           | s                 | rec    | UTI89_C5040 | yjiH      | CDS  |
| S88                  | 4903178           | s                 | rec    | UTI89_C5040 | yjiH      | CDS  |
| S88                  | 4903187           | s                 | rec    | UTI89_C5040 | yjiH      | CDS  |
| S88                  | 4903208           | s                 | rec    | UTI89_C5040 | yjiH      | CDS  |
| S88                  | 4903211           | ns                | rec    | UTI89_C5040 | yjiH      | CDS  |
| S88                  | 4903213           | ns                | rec    | UTI89_C5040 | yjiH      | CDS  |
| S88                  | 4903220           | s                 | rec    | UTI89_C5040 | yjiH      | CDS  |
| S88                  | 4903241           | s                 | rec    | UTI89_C5040 | yjiH      | CDS  |
| S88                  | 4903244           | s                 | rec    | UTI89_C5040 | yjiH      | CDS  |
| S88                  | 4903247           | s                 | rec    | UTI89_C5040 | yjiH      | CDS  |
| S88                  | 4903292           | s                 | rec    | UTI89_C5040 | yjiH      | CDS  |
| S88                  | 4903337           | s                 | rec    | UTI89_C5040 | yjiH      | CDS  |
| S88                  | 4903346           | s                 | rec    | UTI89_C5040 | yjiH      | CDS  |
| S88                  | 4903349           | s                 | rec    | UTI89_C5040 | yjiH      | CDS  |
| S88                  | 4903361           | s                 | rec    | UTI89_C5040 | yjiH      | CDS  |
| S88                  | 4903378           | ns                | rec    | UTI89_C5040 | yjiH      | CDS  |
| S88                  | 4903379           | s                 | rec    | UTI89_C5040 | yjiH      | CDS  |
| S88                  | 4903406           | s                 | rec    | UTI89_C5040 | yjiH      | CDS  |
| S88                  | 4903458           | nc                | rec    | intergenic  |           |      |

| lineage <sup>a</sup> | site <sup>b</sup> | mutation          |        | gene       | Gene name | Type |
|----------------------|-------------------|-------------------|--------|------------|-----------|------|
|                      |                   | type <sup>c</sup> | recomb |            |           |      |
| S88                  | 4903544           | nc                | rec    | intergenic |           |      |
| S88                  | 4903574           | nc                | rec    | intergenic |           |      |
| S88                  | 4903580           | nc                | rec    | intergenic |           |      |
| S88                  | 4903583           | nc                | rec    | intergenic |           |      |
| S88                  | 4903586           | nc                | rec    | intergenic |           |      |
| S88                  | 4903615           | nc                | rec    | intergenic |           |      |
| S88                  | 4903665           | nc                | rec    | intergenic |           |      |
| S88                  | 4903690           | nc                | rec    | intergenic |           |      |
| S88                  | 4903699           | nc                | rec    | intergenic |           |      |
| S88                  | 4903711           | nc                | rec    | intergenic |           |      |
| S88                  | 4903714           | nc                | rec    | intergenic |           |      |
| S88                  | 4903747           | nc                | rec    | intergenic |           |      |
| S88                  | 4903753           | nc                | rec    | intergenic |           |      |
| S88                  | 4903765           | nc                | rec    | intergenic |           |      |
| S88                  | 4903771           | nc                | rec    | intergenic |           |      |
| S88                  | 4903813           | nc                | rec    | intergenic |           |      |
| S88                  | 4903846           | nc                | rec    | intergenic |           |      |
| S88                  | 4903852           | nc                | rec    | intergenic |           |      |
| S88                  | 4903860           | nc                | rec    | intergenic |           |      |
| S88                  | 4903861           | nc                | rec    | intergenic |           |      |
| S88                  | 4903864           | nc                | rec    | intergenic |           |      |
| S88                  | 4903867           | nc                | rec    | intergenic |           |      |
| S88                  | 4903888           | nc                | rec    | intergenic |           |      |
| S88                  | 4903911           | nc                | rec    | intergenic |           |      |
| S88                  | 4903915           | nc                | rec    | intergenic |           |      |
| S88                  | 4903918           | nc                | rec    | intergenic |           |      |
| S88                  | 4903924           | nc                | rec    | intergenic |           |      |
| S88                  | 4903938           | nc                | rec    | intergenic |           |      |
| S88                  | 4903954           | nc                | rec    | intergenic |           |      |
| S88                  | 4903958           | nc                | rec    | intergenic |           |      |
| S88                  | 4903959           | nc                | rec    | intergenic |           |      |
| S88                  | 4903963           | nc                | rec    | intergenic |           |      |
| S88                  | 4903964           | nc                | rec    | intergenic |           |      |
| S88                  | 4903965           | nc                | rec    | intergenic |           |      |
| S88                  | 4903984           | nc                | rec    | intergenic |           |      |
| S88                  | 4904014           | nc                | rec    | intergenic |           |      |
| S88                  | 4904035           | nc                | rec    | intergenic |           |      |
| S88                  | 4904050           | nc                | rec    | intergenic |           |      |
| S88                  | 4904056           | nc                | rec    | intergenic |           |      |
| S88                  | 4904059           | nc                | rec    | intergenic |           |      |
| S88                  | 4904065           | nc                | rec    | intergenic |           |      |
| S88                  | 4904101           | nc                | rec    | intergenic |           |      |
| S88                  | 4904111           | nc                | rec    | intergenic |           |      |
| S88                  | 4904122           | nc                | rec    | intergenic |           |      |
| S88                  | 4904128           | nc                | rec    | intergenic |           |      |

| lineage <sup>a</sup> | site <sup>b</sup> | mutation          |        | gene       | Gene name | Type |
|----------------------|-------------------|-------------------|--------|------------|-----------|------|
|                      |                   | type <sup>c</sup> | recomb |            |           |      |
| S88                  | 4904173           | nc                | rec    | intergenic |           |      |
| S88                  | 4904215           | nc                | rec    | intergenic |           |      |
| S88                  | 4909907           | s                 | rec    | intergenic |           |      |
| S88                  | 4909919           | s                 | rec    | intergenic |           |      |
| S88                  | 4909925           | s                 | rec    | intergenic |           |      |
| S88                  | 4909931           | s                 | rec    | intergenic |           |      |
| S88                  | 4909934           | s                 | rec    | intergenic |           |      |
| S88                  | 4909940           | s                 | rec    | intergenic |           |      |
| S88                  | 4909946           | s                 | rec    | intergenic |           |      |
| S88                  | 4909952           | s                 | rec    | intergenic |           |      |
| S88                  | 4909964           | s                 | rec    | intergenic |           |      |
| S88                  | 4909976           | s                 | rec    | intergenic |           |      |
| S88                  | 4909979           | s                 | rec    | intergenic |           |      |
| S88                  | 4909988           | s                 | rec    | intergenic |           |      |
| S88                  | 4909991           | s                 | rec    | intergenic |           |      |
| S88                  | 4909994           | s                 | rec    | intergenic |           |      |
| S88                  | 4910015           | s                 | rec    | intergenic |           |      |
| S88                  | 4910021           | s                 | rec    | intergenic |           |      |
| S88                  | 4910024           | s                 | rec    | intergenic |           |      |
| S88                  | 4910036           | s                 | rec    | intergenic |           |      |
| S88                  | 4910042           | s                 | rec    | intergenic |           |      |
| S88                  | 4910045           | s                 | rec    | intergenic |           |      |
| S88                  | 4910057           | s                 | rec    | intergenic |           |      |
| S88                  | 4910069           | s                 | rec    | intergenic |           |      |
| S88                  | 4910072           | s                 | rec    | intergenic |           |      |
| S88                  | 4910078           | s                 | rec    | intergenic |           |      |
| S88                  | 4910090           | s                 | rec    | intergenic |           |      |
| S88                  | 4910104           | ns                | rec    | intergenic |           |      |
| S88                  | 4910117           | s                 | rec    | intergenic |           |      |
| S88                  | 4910120           | s                 | rec    | intergenic |           |      |
| S88                  | 4910123           | s                 | rec    | intergenic |           |      |
| S88                  | 4910125           | s                 | rec    | intergenic |           |      |
| S88                  | 4910129           | s                 | rec    | intergenic |           |      |
| S88                  | 4910133           | ns                | rec    | intergenic |           |      |
| S88                  | 4910134           | ns                | rec    | intergenic |           |      |
| S88                  | 4910144           | s                 | rec    | intergenic |           |      |
| S88                  | 4910147           | s                 | rec    | intergenic |           |      |
| S88                  | 4910149           | s                 | rec    | intergenic |           |      |
| S88                  | 4910152           | s                 | rec    | intergenic |           |      |
| S88                  | 4910156           | ns                | rec    | intergenic |           |      |
| S88                  | 4910158           | ns                | rec    | intergenic |           |      |
| S88                  | 4910159           | s                 | rec    | intergenic |           |      |
| S88                  | 4910162           | s                 | rec    | intergenic |           |      |
| S88                  | 4910183           | s                 | rec    | intergenic |           |      |
| S88                  | 4910192           | s                 | rec    | intergenic |           |      |

| lineage <sup>a</sup> | site <sup>b</sup> | mutation          |        | gene       | Gene name | Type |
|----------------------|-------------------|-------------------|--------|------------|-----------|------|
|                      |                   | type <sup>c</sup> | recomb |            |           |      |
| S88                  | 4910195           | s                 | rec    | intergenic |           |      |
| S88                  | 4910198           | s                 | rec    | intergenic |           |      |
| S88                  | 4910201           | s                 | rec    | intergenic |           |      |
| S88                  | 4910207           | s                 | rec    | intergenic |           |      |
| S88                  | 4910213           | s                 | rec    | intergenic |           |      |
| S88                  | 4910222           | s                 | rec    | intergenic |           |      |
| S88                  | 4910234           | s                 | rec    | intergenic |           |      |
| S88                  | 4910240           | s                 | rec    | intergenic |           |      |
| S88                  | 4910243           | s                 | rec    | intergenic |           |      |
| S88                  | 4910249           | s                 | rec    | intergenic |           |      |
| S88                  | 4910252           | s                 | rec    | intergenic |           |      |
| S88                  | 4910258           | s                 | rec    | intergenic |           |      |
| S88                  | 4910261           | s                 | rec    | intergenic |           |      |
| S88                  | 4910263           | s                 | rec    | intergenic |           |      |
| S88                  | 4910264           | s                 | rec    | intergenic |           |      |
| S88                  | 4910270           | s                 | rec    | intergenic |           |      |
| S88                  | 4910276           | s                 | rec    | intergenic |           |      |
| S88                  | 4910279           | s                 | rec    | intergenic |           |      |
| S88                  | 4910282           | s                 | rec    | intergenic |           |      |
| S88                  | 4910284           | s                 | rec    | intergenic |           |      |
| S88                  | 4910287           | ns                | rec    | intergenic |           |      |
| S88                  | 4910288           | s                 | rec    | intergenic |           |      |
| S88                  | 4910291           | ns                | rec    | intergenic |           |      |
| S88                  | 4910292           | ns                | rec    | intergenic |           |      |
| S88                  | 4910293           | ns                | rec    | intergenic |           |      |
| S88                  | 4910297           | s                 | rec    | intergenic |           |      |
| S88                  | 4910300           | s                 | rec    | intergenic |           |      |
| S88                  | 4910324           | s                 | rec    | intergenic |           |      |
| S88                  | 4910327           | s                 | rec    | intergenic |           |      |
| S88                  | 4910348           | s                 | rec    | intergenic |           |      |
| S88                  | 4910357           | s                 | rec    | intergenic |           |      |
| S88                  | 4910360           | s                 | rec    | intergenic |           |      |
| S88                  | 4910365           | s                 | rec    | intergenic |           |      |
| S88                  | 4910369           | s                 | rec    | intergenic |           |      |
| S88                  | 4910390           | ns                | rec    | intergenic |           |      |
| S88                  | 4910391           | ns                | rec    | intergenic |           |      |
| S88                  | 4910392           | ns                | rec    | intergenic |           |      |
| S88                  | 4910393           | s                 | rec    | intergenic |           |      |
| S88                  | 4910400           | ns                | rec    | intergenic |           |      |
| S88                  | 4910402           | ns                | rec    | intergenic |           |      |
| S88                  | 4910403           | ns                | rec    | intergenic |           |      |
| S88                  | 4910418           | ns                | rec    | intergenic |           |      |
| S88                  | 4910419           | ns                | rec    | intergenic |           |      |
| S88                  | 4910423           | ns                | rec    | intergenic |           |      |
| S88                  | 4910425           | ns                | rec    | intergenic |           |      |

| lineage <sup>a</sup> | site <sup>b</sup> | mutation          |        | gene       | Gene name | Type |
|----------------------|-------------------|-------------------|--------|------------|-----------|------|
|                      |                   | type <sup>c</sup> | recomb |            |           |      |
| S88                  | 4910429           | ns                | rec    | intergenic |           |      |
| S88                  | 4910430           | ns                | rec    | intergenic |           |      |
| S88                  | 4910431           | ns                | rec    | intergenic |           |      |
| S88                  | 4910438           | ns                | rec    | intergenic |           |      |
| S88                  | 4910444           | s                 | rec    | intergenic |           |      |
| S88                  | 4910447           | ns                | rec    | intergenic |           |      |
| S88                  | 4910450           | s                 | rec    | intergenic |           |      |
| S88                  | 4910452           | s                 | rec    | intergenic |           |      |
| S88                  | 4910453           | s                 | rec    | intergenic |           |      |
| S88                  | 4910458           | ns                | rec    | intergenic |           |      |
| S88                  | 4910459           | s                 | rec    | intergenic |           |      |
| S88                  | 4910462           | s                 | rec    | intergenic |           |      |
| S88                  | 4910467           | ns                | rec    | intergenic |           |      |
| S88                  | 4910470           | s                 | rec    | intergenic |           |      |
| S88                  | 4910471           | ns                | rec    | intergenic |           |      |
| S88                  | 4910474           | ns                | rec    | intergenic |           |      |
| S88                  | 4910478           | ns                | rec    | intergenic |           |      |
| S88                  | 4910486           | s                 | rec    | intergenic |           |      |
| S88                  | 4910489           | s                 | rec    | intergenic |           |      |
| S88                  | 4910495           | s                 | rec    | intergenic |           |      |
| S88                  | 4910504           | s                 | rec    | intergenic |           |      |
| S88                  | 4910513           | s                 | rec    | intergenic |           |      |
| S88                  | 4910516           | s                 | rec    | intergenic |           |      |
| S88                  | 4910523           | ns                | rec    | intergenic |           |      |
| S88                  | 4910543           | s                 | rec    | intergenic |           |      |
| S88                  | 4910561           | s                 | rec    | intergenic |           |      |
| S88                  | 4910570           | ns                | rec    | intergenic |           |      |
| S88                  | 4910572           | ns                | rec    | intergenic |           |      |
| S88                  | 4910579           | s                 | rec    | intergenic |           |      |
| S88                  | 4910588           | s                 | rec    | intergenic |           |      |
| S88                  | 4910590           | s                 | rec    | intergenic |           |      |
| S88                  | 4910591           | s                 | rec    | intergenic |           |      |
| S88                  | 4910594           | s                 | rec    | intergenic |           |      |
| S88                  | 4910597           | s                 | rec    | intergenic |           |      |
| S88                  | 4910600           | s                 | rec    | intergenic |           |      |
| S88                  | 4910606           | s                 | rec    | intergenic |           |      |
| S88                  | 4910615           | s                 | rec    | intergenic |           |      |
| S88                  | 4910618           | s                 | rec    | intergenic |           |      |
| S88                  | 4910621           | s                 | rec    | intergenic |           |      |
| S88                  | 4910627           | s                 | rec    | intergenic |           |      |
| S88                  | 4910630           | s                 | rec    | intergenic |           |      |
| S88                  | 4910636           | s                 | rec    | intergenic |           |      |
| S88                  | 4910639           | s                 | rec    | intergenic |           |      |
| S88                  | 4910642           | s                 | rec    | intergenic |           |      |
| S88                  | 4910650           | s                 | rec    | intergenic |           |      |



| lineage <sup>a</sup> | site <sup>b</sup> | mutation          |        | gene       | Gene name | Type |
|----------------------|-------------------|-------------------|--------|------------|-----------|------|
|                      |                   | type <sup>c</sup> | recomb |            |           |      |
| S88                  | 4910654           | s                 | rec    | intergenic |           |      |
| S88                  | 4910669           | s                 | rec    | intergenic |           |      |
| S88                  | 4910678           | ns                | rec    | intergenic |           |      |
| S88                  | 4910680           | ns                | rec    | intergenic |           |      |
| S88                  | 4910687           | ns                | rec    | intergenic |           |      |
| S88                  | 4910689           | ns                | rec    | intergenic |           |      |
| S88                  | 4910690           | ns                | rec    | intergenic |           |      |
| S88                  | 4910693           | s                 | rec    | intergenic |           |      |
| S88                  | 4910701           | ns                | rec    | intergenic |           |      |
| S88                  | 4910705           | s                 | rec    | intergenic |           |      |
| S88                  | 4910709           | ns                | rec    | intergenic |           |      |
| S88                  | 4910711           | s                 | rec    | intergenic |           |      |
| S88                  | 4910713           | s                 | rec    | intergenic |           |      |
| S88                  | 4910717           | s                 | rec    | intergenic |           |      |
| S88                  | 4910723           | s                 | rec    | intergenic |           |      |
| S88                  | 4910732           | s                 | rec    | intergenic |           |      |
| S88                  | 4910735           | s                 | rec    | intergenic |           |      |
| S88                  | 4910738           | s                 | rec    | intergenic |           |      |
| S88                  | 4910742           | ns                | rec    | intergenic |           |      |
| S88                  | 4910744           | s                 | rec    | intergenic |           |      |
| S88                  | 4910747           | s                 | rec    | intergenic |           |      |
| S88                  | 4910753           | s                 | rec    | intergenic |           |      |
| S88                  | 4910759           | s                 | rec    | intergenic |           |      |
| S88                  | 4910765           | s                 | rec    | intergenic |           |      |
| S88                  | 4910768           | s                 | rec    | intergenic |           |      |
| S88                  | 4910780           | s                 | rec    | intergenic |           |      |
| S88                  | 4910783           | s                 | rec    | intergenic |           |      |
| S88                  | 4910786           | ns                | rec    | intergenic |           |      |
| S88                  | 4910787           | ns                | rec    | intergenic |           |      |
| S88                  | 4910788           | ns                | rec    | intergenic |           |      |
| S88                  | 4910789           | s                 | rec    | intergenic |           |      |
| S88                  | 4910795           | s                 | rec    | intergenic |           |      |
| S88                  | 4910801           | s                 | rec    | intergenic |           |      |
| S88                  | 4910804           | s                 | rec    | intergenic |           |      |
| S88                  | 4910810           | s                 | rec    | intergenic |           |      |
| S88                  | 4910816           | s                 | rec    | intergenic |           |      |
| S88                  | 4910819           | s                 | rec    | intergenic |           |      |
| S88                  | 4910822           | s                 | rec    | intergenic |           |      |
| S88                  | 4910834           | s                 | rec    | intergenic |           |      |
| S88                  | 4910843           | s                 | rec    | intergenic |           |      |
| S88                  | 4910846           | ns                | rec    | intergenic |           |      |
| S88                  | 4910847           | ns                | rec    | intergenic |           |      |
| S88                  | 4910852           | s                 | rec    | intergenic |           |      |
| S88                  | 4910858           | s                 | rec    | intergenic |           |      |
| S88                  | 4910864           | ns                | rec    | intergenic |           |      |

| lineage <sup>a</sup> | site <sup>b</sup> | mutation          |        | gene       | Gene name | Type |
|----------------------|-------------------|-------------------|--------|------------|-----------|------|
|                      |                   | type <sup>c</sup> | recomb |            |           |      |
| S88                  | 4910866           | ns                | rec    | intergenic |           |      |
| S88                  | 4910873           | s                 | rec    | intergenic |           |      |
| S88                  | 4910879           | ns                | rec    | intergenic |           |      |
| S88                  | 4910880           | ns                | rec    | intergenic |           |      |
| S88                  | 4910881           | ns                | rec    | intergenic |           |      |
| S88                  | 4910882           | s                 | rec    | intergenic |           |      |
| S88                  | 4910893           | ns                | rec    | intergenic |           |      |
| S88                  | 4910900           | s                 | rec    | intergenic |           |      |
| S88                  | 4910905           | s                 | rec    | intergenic |           |      |
| S88                  | 4910909           | s                 | rec    | intergenic |           |      |
| S88                  | 4910918           | s                 | rec    | intergenic |           |      |
| S88                  | 4910921           | s                 | rec    | intergenic |           |      |
| S88                  | 4910966           | s                 | rec    | intergenic |           |      |
| S88                  | 4910968           | s                 | rec    | intergenic |           |      |
| S88                  | 4910987           | s                 | rec    | intergenic |           |      |
| S88                  | 4911005           | ns                | rec    | intergenic |           |      |
| S88                  | 4911007           | ns                | rec    | intergenic |           |      |
| S88                  | 4911012           | ns                | rec    | intergenic |           |      |
| S88                  | 4911013           | ns                | rec    | intergenic |           |      |
| S88                  | 4911020           | nc                | rec    | intergenic |           |      |
| S88                  | 4911021           | nc                | rec    | intergenic |           |      |
| S88                  | 4911022           | nc                | rec    | intergenic |           |      |
| S88                  | 4911026           | nc                | rec    | intergenic |           |      |
| S88                  | 4911033           | nc                | rec    | intergenic |           |      |
| S88                  | 4911034           | nc                | rec    | intergenic |           |      |
| S88                  | 4911036           | nc                | rec    | intergenic |           |      |
| S88                  | 4911040           | nc                | rec    | intergenic |           |      |
| S88                  | 4911041           | nc                | rec    | intergenic |           |      |
| S88                  | 4911042           | nc                | rec    | intergenic |           |      |
| S88                  | 4911261           | s                 | rec    | intergenic |           |      |
| S88                  | 4911264           | s                 | rec    | intergenic |           |      |
| S88                  | 4911270           | s                 | rec    | intergenic |           |      |
| S88                  | 4911273           | s                 | rec    | intergenic |           |      |
| S88                  | 4911279           | s                 | rec    | intergenic |           |      |
| S88                  | 4911284           | s                 | rec    | intergenic |           |      |
| S88                  | 4911291           | s                 | rec    | intergenic |           |      |
| S88                  | 4911293           | s                 | rec    | intergenic |           |      |
| S88                  | 4911303           | s                 | rec    | intergenic |           |      |
| S88                  | 4911307           | ns                | rec    | intergenic |           |      |
| S88                  | 4911318           | s                 | rec    | intergenic |           |      |
| S88                  | 4911324           | s                 | rec    | intergenic |           |      |
| S88                  | 4911327           | s                 | rec    | intergenic |           |      |
| S88                  | 4911336           | s                 | rec    | intergenic |           |      |
| S88                  | 4911345           | s                 | rec    | intergenic |           |      |
| S88                  | 4911348           | s                 | rec    | intergenic |           |      |

| lineage <sup>a</sup> | site <sup>b</sup> | mutation          |        | gene       | Gene name | Type |
|----------------------|-------------------|-------------------|--------|------------|-----------|------|
|                      |                   | type <sup>c</sup> | recomb |            |           |      |
| S88                  | 4911351           | s                 | rec    | intergenic |           |      |
| S88                  | 4911354           | s                 | rec    | intergenic |           |      |
| S88                  | 4911356           | s                 | rec    | intergenic |           |      |
| S88                  | 4911357           | s                 | rec    | intergenic |           |      |
| S88                  | 4911360           | s                 | rec    | intergenic |           |      |
| S88                  | 4911363           | s                 | rec    | intergenic |           |      |
| S88                  | 4911381           | s                 | rec    | intergenic |           |      |
| S88                  | 4911386           | ns                | rec    | intergenic |           |      |
| S88                  | 4911392           | ns                | rec    | intergenic |           |      |
| S88                  | 4911393           | s                 | rec    | intergenic |           |      |
| S88                  | 4911396           | s                 | rec    | intergenic |           |      |
| S88                  | 4911403           | ns                | rec    | intergenic |           |      |
| S88                  | 4911405           | s                 | rec    | intergenic |           |      |
| S88                  | 4911417           | s                 | rec    | intergenic |           |      |
| S88                  | 4911420           | s                 | rec    | intergenic |           |      |
| S88                  | 4911426           | s                 | rec    | intergenic |           |      |
| S88                  | 4911450           | s                 | rec    | intergenic |           |      |
| S88                  | 4911453           | s                 | rec    | intergenic |           |      |
| S88                  | 4911456           | s                 | rec    | intergenic |           |      |
| APEC                 | 4945745           | s                 |        | intergenic |           |      |
| S88                  | 4911462           | ns                | rec    | intergenic |           |      |
| S88                  | 4911463           | ns                | rec    | intergenic |           |      |
| S88                  | 4911464           | ns                | rec    | intergenic |           |      |
| S88                  | 4911465           | s                 | rec    | intergenic |           |      |
| S88                  | 4911468           | s                 | rec    | intergenic |           |      |
| S88                  | 4911471           | s                 | rec    | intergenic |           |      |
| S88                  | 4911476           | s                 | rec    | intergenic |           |      |
| S88                  | 4911477           | s                 | rec    | intergenic |           |      |
| S88                  | 4911486           | s                 | rec    | intergenic |           |      |
| S88                  | 4911489           | s                 | rec    | intergenic |           |      |
| S88                  | 4911492           | s                 | rec    | intergenic |           |      |
| S88                  | 4911495           | s                 | rec    | intergenic |           |      |
| S88                  | 4911501           | ns                | rec    | intergenic |           |      |
| S88                  | 4911503           | ns                | rec    | intergenic |           |      |
| S88                  | 4911512           | s                 | rec    | intergenic |           |      |
| S88                  | 4911513           | s                 | rec    | intergenic |           |      |
| S88                  | 4911522           | s                 | rec    | intergenic |           |      |
| S88                  | 4911537           | ns                | rec    | intergenic |           |      |
| S88                  | 4911538           | ns                | rec    | intergenic |           |      |
| S88                  | 4911549           | ns                | rec    | intergenic |           |      |
| S88                  | 4911551           | ns                | rec    | intergenic |           |      |
| S88                  | 4911552           | ns                | rec    | intergenic |           |      |
| S88                  | 4911554           | ns                | rec    | intergenic |           |      |
| S88                  | 4911556           | ns                | rec    | intergenic |           |      |
| S88                  | 4911558           | s                 | rec    | intergenic |           |      |

| lineage <sup>a</sup> | site <sup>b</sup> | mutation          |        | gene       | Gene name | Type |
|----------------------|-------------------|-------------------|--------|------------|-----------|------|
|                      |                   | type <sup>c</sup> | recomb |            |           |      |
| S88                  | 4911579           | s                 | rec    | intergenic |           |      |
| S88                  | 4911582           | s                 | rec    | intergenic |           |      |
| S88                  | 4911585           | s                 | rec    | intergenic |           |      |
| S88                  | 4911588           | s                 | rec    | intergenic |           |      |
| S88                  | 4911594           | s                 | rec    | intergenic |           |      |
| S88                  | 4911597           | s                 | rec    | intergenic |           |      |
| S88                  | 4911606           | ns                | rec    | intergenic |           |      |
| S88                  | 4911608           | ns                | rec    | intergenic |           |      |
| S88                  | 4911615           | s                 | rec    | intergenic |           |      |
| S88                  | 4911627           | s                 | rec    | intergenic |           |      |
| S88                  | 4911654           | s                 | rec    | intergenic |           |      |
| S88                  | 4911657           | s                 | rec    | intergenic |           |      |
| S88                  | 4911663           | s                 | rec    | intergenic |           |      |
| S88                  | 4911674           | s                 | rec    | intergenic |           |      |
| S88                  | 4911675           | s                 | rec    | intergenic |           |      |
| S88                  | 4911678           | s                 | rec    | intergenic |           |      |
| S88                  | 4911681           | ns                | rec    | intergenic |           |      |
| S88                  | 4911683           | ns                | rec    | intergenic |           |      |
| S88                  | 4911687           | s                 | rec    | intergenic |           |      |
| S88                  | 4911699           | s                 | rec    | intergenic |           |      |
| S88                  | 4911704           | ns                | rec    | intergenic |           |      |
| S88                  | 4911705           | s                 | rec    | intergenic |           |      |
| S88                  | 4911741           | s                 | rec    | intergenic |           |      |
| S88                  | 4911744           | s                 | rec    | intergenic |           |      |
| S88                  | 4911747           | s                 | rec    | intergenic |           |      |
| S88                  | 4911759           | s                 | rec    | intergenic |           |      |
| S88                  | 4911762           | s                 | rec    | intergenic |           |      |
| S88                  | 4911771           | ns                | rec    | intergenic |           |      |
| S88                  | 4911774           | s                 | rec    | intergenic |           |      |
| S88                  | 4911779           | ns                | rec    | intergenic |           |      |
| S88                  | 4911780           | s                 | rec    | intergenic |           |      |
| S88                  | 4911785           | ns                | rec    | intergenic |           |      |
| S88                  | 4911789           | s                 | rec    | intergenic |           |      |
| S88                  | 4911795           | s                 | rec    | intergenic |           |      |
| S88                  | 4911798           | s                 | rec    | intergenic |           |      |
| S88                  | 4911801           | s                 | rec    | intergenic |           |      |
| S88                  | 4911804           | s                 | rec    | intergenic |           |      |
| S88                  | 4911810           | ns                | rec    | intergenic |           |      |
| S88                  | 4911813           | s                 | rec    | intergenic |           |      |
| S88                  | 4911825           | ns                | rec    | intergenic |           |      |
| S88                  | 4911826           | ns                | rec    | intergenic |           |      |
| S88                  | 4911827           | ns                | rec    | intergenic |           |      |
| S88                  | 4911831           | ns                | rec    | intergenic |           |      |
| S88                  | 4911832           | ns                | rec    | intergenic |           |      |
| S88                  | 4911837           | ns                | rec    | intergenic |           |      |

| lineage <sup>a</sup> | site <sup>b</sup> | mutation          |        | gene        | Gene name | Type |
|----------------------|-------------------|-------------------|--------|-------------|-----------|------|
|                      |                   | type <sup>c</sup> | recomb |             |           |      |
| S88                  | 4911839           | ns                | rec    | intergenic  |           |      |
| S88                  | 4911850           | ns                | rec    | intergenic  |           |      |
| S88                  | 4911855           | s                 | rec    | intergenic  |           |      |
| S88                  | 4914690           | s                 | rec    | intergenic  |           |      |
| S88                  | 4914702           | s                 | rec    | intergenic  |           |      |
| S88                  | 4914801           | s                 | rec    | intergenic  |           |      |
| S88                  | 4914840           | s                 | rec    | intergenic  |           |      |
| S88                  | 4914842           | s                 | rec    | intergenic  |           |      |
| S88                  | 4914844           | ns                | rec    | intergenic  |           |      |
| S88                  | 4914855           | ns                | rec    | UTI89_C5044 | yjiL      | CDS  |
| S88                  | 4914856           | ns                | rec    | UTI89_C5044 | yjiL      | CDS  |
| S88                  | 4914867           | ns                | rec    | UTI89_C5044 | yjiL      | CDS  |
| S88                  | 4914868           | ns                | rec    | UTI89_C5044 | yjiL      | CDS  |
| S88                  | 4914869           | s                 | rec    | UTI89_C5044 | yjiL      | CDS  |
| S88                  | 4914872           | s                 | rec    | UTI89_C5044 | yjiL      | CDS  |
| S88                  | 4914878           | s                 | rec    | UTI89_C5044 | yjiL      | CDS  |
| S88                  | 4914881           | s                 | rec    | UTI89_C5044 | yjiL      | CDS  |
| S88                  | 4914887           | s                 | rec    | UTI89_C5044 | yjiL      | CDS  |
| S88                  | 4914899           | s                 | rec    | UTI89_C5044 | yjiL      | CDS  |
| S88                  | 4914905           | s                 | rec    | UTI89_C5044 | yjiL      | CDS  |
| S88                  | 4914920           | s                 | rec    | UTI89_C5044 | yjiL      | CDS  |
| S88                  | 4914923           | s                 | rec    | UTI89_C5044 | yjiL      | CDS  |
| S88                  | 4914949           | ns                | rec    | UTI89_C5044 | yjiL      | CDS  |
| S88                  | 4914955           | s                 | rec    | UTI89_C5044 | yjiL      | CDS  |
| S88                  | 4915070           | s                 | rec    | UTI89_C5044 | yjiL      | CDS  |
| S88                  | 4915091           | s                 | rec    | UTI89_C5044 | yjiL      | CDS  |
| S88                  | 4915100           | s                 | rec    | UTI89_C5044 | yjiL      | CDS  |
| S88                  | 4915127           | s                 | rec    | UTI89_C5044 | yjiL      | CDS  |
| S88                  | 4915136           | s                 | rec    | UTI89_C5044 | yjiL      | CDS  |
| S88                  | 4915139           | s                 | rec    | UTI89_C5044 | yjiL      | CDS  |
| S88                  | 4915154           | s                 | rec    | UTI89_C5044 | yjiL      | CDS  |
| S88                  | 4915190           | s                 | rec    | UTI89_C5044 | yjiL      | CDS  |
| S88                  | 4915193           | s                 | rec    | UTI89_C5044 | yjiL      | CDS  |
| S88                  | 4915198           | ns                | rec    | UTI89_C5044 | yjiL      | CDS  |
| S88                  | 4915292           | s                 | rec    | UTI89_C5044 | yjiL      | CDS  |
| S88                  | 4915322           | s                 | rec    | UTI89_C5044 | yjiL      | CDS  |
| S88                  | 4915340           | s                 | rec    | UTI89_C5044 | yjiL      | CDS  |
| S88                  | 4915356           | ns                | rec    | UTI89_C5044 | yjiL      | CDS  |
| S88                  | 4915391           | s                 | rec    | UTI89_C5044 | yjiL      | CDS  |
| S88                  | 4915400           | s                 | rec    | UTI89_C5044 | yjiL      | CDS  |
| S88                  | 4915457           | s                 | rec    | UTI89_C5044 | yjiL      | CDS  |
| S88                  | 4915463           | s                 | rec    | UTI89_C5044 | yjiL      | CDS  |
| S88                  | 4915477           | ns                | rec    | UTI89_C5044 | yjiL      | CDS  |
| S88                  | 4915523           | s                 | rec    | UTI89_C5044 | yjiL      | CDS  |
| S88                  | 4915559           | s                 | rec    | UTI89_C5044 | yjiL      | CDS  |

| lineage <sup>a</sup> | site <sup>b</sup> | mutation          |        | gene        | Gene name | Type |
|----------------------|-------------------|-------------------|--------|-------------|-----------|------|
|                      |                   | type <sup>c</sup> | recomb |             |           |      |
| S88                  | 4915582           | ns                | rec    | UTI89_C5044 | yjiL      | CDS  |
| S88                  | 4915615           | ns                | rec    | UTI89_C5044 | yjiL      | CDS  |
| S88                  | 4915655           | s                 | rec    | UTI89_C5045 | yjiM      | CDS  |
| S88                  | 4915823           | s                 | rec    | UTI89_C5045 | yjiM      | CDS  |
| S88                  | 4915843           | ns                | rec    | UTI89_C5045 | yjiM      | CDS  |
| S88                  | 4915913           | s                 | rec    | UTI89_C5045 | yjiM      | CDS  |
| S88                  | 4915919           | s                 | rec    | UTI89_C5045 | yjiM      | CDS  |
| S88                  | 4915928           | s                 | rec    | UTI89_C5045 | yjiM      | CDS  |
| S88                  | 4915946           | s                 | rec    | UTI89_C5045 | yjiM      | CDS  |
| S88                  | 4916018           | s                 | rec    | UTI89_C5045 | yjiM      | CDS  |
| S88                  | 4916036           | s                 | rec    | UTI89_C5045 | yjiM      | CDS  |
| S88                  | 4916057           | s                 | rec    | UTI89_C5045 | yjiM      | CDS  |
| S88                  | 4916060           | s                 | rec    | UTI89_C5045 | yjiM      | CDS  |
| S88                  | 4916063           | s                 | rec    | UTI89_C5045 | yjiM      | CDS  |
| S88                  | 4916171           | s                 | rec    | UTI89_C5045 | yjiM      | CDS  |
| S88                  | 4916174           | s                 | rec    | UTI89_C5045 | yjiM      | CDS  |
| S88                  | 4916222           | s                 | rec    | UTI89_C5045 | yjiM      | CDS  |
| S88                  | 4916224           | s                 | rec    | UTI89_C5045 | yjiM      | CDS  |
| S88                  | 4916234           | s                 | rec    | UTI89_C5045 | yjiM      | CDS  |
| S88                  | 4916237           | s                 | rec    | UTI89_C5045 | yjiM      | CDS  |
| S88                  | 4916300           | s                 | rec    | UTI89_C5045 | yjiM      | CDS  |
| S88                  | 4916357           | s                 | rec    | UTI89_C5045 | yjiM      | CDS  |
| S88                  | 4916390           | s                 | rec    | UTI89_C5045 | yjiM      | CDS  |
| S88                  | 4916393           | s                 | rec    | UTI89_C5045 | yjiM      | CDS  |
| S88                  | 4916395           | s                 | rec    | UTI89_C5045 | yjiM      | CDS  |
| S88                  | 4916396           | s                 | rec    | UTI89_C5045 | yjiM      | CDS  |
| S88                  | 4916411           | s                 | rec    | UTI89_C5045 | yjiM      | CDS  |
| S88                  | 4916606           | s                 | rec    | UTI89_C5045 | yjiM      | CDS  |
| S88                  | 4916621           | s                 | rec    | UTI89_C5045 | yjiM      | CDS  |
| S88                  | 4916844           | nc                | rec    | intergenic  |           |      |
| S88                  | 4916898           | ns                | rec    | UTI89_C5046 | yjiN      | CDS  |
| S88                  | 4916934           | s                 | rec    | UTI89_C5046 | yjiN      | CDS  |
| S88                  | 4916949           | s                 | rec    | UTI89_C5046 | yjiN      | CDS  |
| S88                  | 4916952           | s                 | rec    | UTI89_C5046 | yjiN      | CDS  |
| S88                  | 4916988           | s                 | rec    | UTI89_C5046 | yjiN      | CDS  |
| S88                  | 4916997           | s                 | rec    | UTI89_C5046 | yjiN      | CDS  |
| S88                  | 4917042           | s                 | rec    | UTI89_C5046 | yjiN      | CDS  |
| S88                  | 4917045           | s                 | rec    | UTI89_C5046 | yjiN      | CDS  |
| S88                  | 4917063           | s                 | rec    | UTI89_C5046 | yjiN      | CDS  |
| S88                  | 4917078           | s                 | rec    | UTI89_C5046 | yjiN      | CDS  |
| S88                  | 4917090           | s                 | rec    | UTI89_C5046 | yjiN      | CDS  |
| S88                  | 4917105           | s                 | rec    | UTI89_C5046 | yjiN      | CDS  |
| S88                  | 4917114           | s                 | rec    | UTI89_C5046 | yjiN      | CDS  |
| S88                  | 4917126           | s                 | rec    | UTI89_C5046 | yjiN      | CDS  |
| S88                  | 4917189           | s                 | rec    | UTI89_C5046 | yjiN      | CDS  |

| lineage <sup>a</sup> | site <sup>b</sup> | mutation          |        | gene        | Gene name | Type |
|----------------------|-------------------|-------------------|--------|-------------|-----------|------|
|                      |                   | type <sup>c</sup> | recomb |             |           |      |
| S88                  | 4917233           | ns                | rec    | UT189_C5046 | yjiN      | CDS  |
| S88                  | 4917294           | s                 | rec    | UT189_C5046 | yjiN      | CDS  |
| S88                  | 4917297           | s                 | rec    | UT189_C5046 | yjiN      | CDS  |
| S88                  | 4917315           | s                 | rec    | UT189_C5046 | yjiN      | CDS  |
| S88                  | 4917362           | s                 | rec    | UT189_C5046 | yjiN      | CDS  |
| S88                  | 4917381           | s                 | rec    | UT189_C5046 | yjiN      | CDS  |
| S88                  | 4917388           | ns                | rec    | UT189_C5046 | yjiN      | CDS  |
| S88                  | 4917402           | s                 | rec    | UT189_C5046 | yjiN      | CDS  |
| S88                  | 4917498           | s                 | rec    | UT189_C5046 | yjiN      | CDS  |
| S88                  | 4917519           | s                 | rec    | UT189_C5046 | yjiN      | CDS  |
| S88                  | 4917570           | s                 | rec    | UT189_C5046 | yjiN      | CDS  |
| S88                  | 4917591           | s                 | rec    | UT189_C5046 | yjiN      | CDS  |
| S88                  | 4917594           | s                 | rec    | UT189_C5046 | yjiN      | CDS  |
| S88                  | 4917603           | s                 | rec    | UT189_C5046 | yjiN      | CDS  |
| S88                  | 4917678           | s                 | rec    | UT189_C5046 | yjiN      | CDS  |
| S88                  | 4917705           | s                 | rec    | UT189_C5046 | yjiN      | CDS  |
| S88                  | 4917756           | s                 | rec    | UT189_C5046 | yjiN      | CDS  |
| S88                  | 4917765           | s                 | rec    | UT189_C5046 | yjiN      | CDS  |
| S88                  | 4917777           | s                 | rec    | UT189_C5046 | yjiN      | CDS  |
| S88                  | 4917807           | s                 | rec    | UT189_C5046 | yjiN      | CDS  |
| S88                  | 4917810           | s                 | rec    | UT189_C5046 | yjiN      | CDS  |
| S88                  | 4917852           | s                 | rec    | UT189_C5046 | yjiN      | CDS  |
| S88                  | 4917876           | s                 | rec    | UT189_C5046 | yjiN      | CDS  |
| S88                  | 4917909           | s                 | rec    | UT189_C5046 | yjiN      | CDS  |
| S88                  | 4917978           | s                 | rec    | UT189_C5046 | yjiN      | CDS  |
| S88                  | 4918059           | s                 | rec    | UT189_C5046 | yjiN      | CDS  |
| APEC                 | 4949832           | s                 |        | UT189_C5046 | yjiN      | CDS  |
| S88                  | 4918177           | ns                | rec    | UT189_C5046 | yjiN      | CDS  |
| S88                  | 4919806           | nc                | rec    | intergenic  |           |      |
| S88                  | 4919810           | nc                | rec    | intergenic  |           |      |
| S88                  | 4919827           | nc                | rec    | intergenic  |           |      |
| S88                  | 4919829           | nc                | rec    | intergenic  |           |      |
| S88                  | 4919841           | nc                | rec    | intergenic  |           |      |
| S88                  | 4919848           | nc                | rec    | intergenic  |           |      |
| S88                  | 4919852           | nc                | rec    | intergenic  |           |      |
| S88                  | 4919857           | nc                | rec    | intergenic  |           |      |
| S88                  | 4919864           | nc                | rec    | intergenic  |           |      |
| S88                  | 4919879           | nc                | rec    | intergenic  |           |      |
| S88                  | 4919883           | nc                | rec    | intergenic  |           |      |
| S88                  | 4919926           | s                 | rec    | UT189_C5047 | -         | CDS  |
| S88                  | 4919929           | s                 | rec    | UT189_C5047 | -         | CDS  |
| S88                  | 4919971           | s                 | rec    | UT189_C5047 | -         | CDS  |
| S88                  | 4919975           | ns                | rec    | UT189_C5047 | -         | CDS  |
| S88                  | 4920043           | s                 | rec    | UT189_C5047 | -         | CDS  |
| S88                  | 4920127           | s                 | rec    | UT189_C5047 | -         | CDS  |

| lineage <sup>a</sup> | site <sup>b</sup> | mutation          |        | gene        | Gene name | Type |
|----------------------|-------------------|-------------------|--------|-------------|-----------|------|
|                      |                   | type <sup>c</sup> | recomb |             |           |      |
| S88                  | 4920151           | s                 | rec    | UTI89_C5047 | -         | CDS  |
| S88                  | 4920172           | s                 | rec    | UTI89_C5047 | -         | CDS  |
| S88                  | 4920181           | s                 | rec    | UTI89_C5047 | -         | CDS  |
| S88                  | 4920196           | s                 | rec    | UTI89_C5047 | -         | CDS  |
| S88                  | 4920238           | s                 | rec    | UTI89_C5047 | -         | CDS  |
| S88                  | 4920255           | ns                | rec    | UTI89_C5047 | -         | CDS  |
| S88                  | 4920262           | s                 | rec    | UTI89_C5047 | -         | CDS  |
| S88                  | 4920301           | s                 | rec    | UTI89_C5047 | -         | CDS  |
| S88                  | 4920316           | s                 | rec    | UTI89_C5047 | -         | CDS  |
| S88                  | 4920317           | s                 | rec    | UTI89_C5047 | -         | CDS  |
| S88                  | 4920340           | s                 | rec    | UTI89_C5047 | -         | CDS  |
| S88                  | 4920346           | s                 | rec    | UTI89_C5047 | -         | CDS  |
| S88                  | 4920349           | s                 | rec    | UTI89_C5047 | -         | CDS  |
| S88                  | 4920373           | s                 | rec    | UTI89_C5047 | -         | CDS  |
| S88                  | 4920392           | ns                | rec    | UTI89_C5047 | -         | CDS  |
| S88                  | 4920493           | s                 | rec    | UTI89_C5047 | -         | CDS  |
| S88                  | 4920496           | s                 | rec    | UTI89_C5047 | -         | CDS  |
| S88                  | 4920506           | ns                | rec    | UTI89_C5047 | -         | CDS  |
| S88                  | 4920547           | s                 | rec    | UTI89_C5047 | -         | CDS  |
| S88                  | 4920577           | s                 | rec    | UTI89_C5047 | -         | CDS  |
| S88                  | 4920595           | ns                | rec    | UTI89_C5047 | -         | CDS  |
| S88                  | 4920596           | ns                | rec    | UTI89_C5047 | -         | CDS  |
| S88                  | 4920607           | s                 | rec    | UTI89_C5047 | -         | CDS  |
| S88                  | 4920611           | ns                | rec    | UTI89_C5047 | -         | CDS  |
| S88                  | 4920623           | ns                | rec    | UTI89_C5047 | -         | CDS  |
| S88                  | 4920634           | ns                | rec    | UTI89_C5047 | -         | CDS  |
| S88                  | 4920668           | ns                | rec    | UTI89_C5047 | -         | CDS  |
| S88                  | 4920725           | ns                | rec    | UTI89_C5047 | -         | CDS  |
| S88                  | 4920727           | ns                | rec    | UTI89_C5047 | -         | CDS  |
| S88                  | 4920730           | s                 | rec    | UTI89_C5047 | -         | CDS  |
| S88                  | 4920739           | ns                | rec    | UTI89_C5047 | -         | CDS  |
| S88                  | 4920753           | ns                | rec    | UTI89_C5047 | -         | CDS  |
| S88                  | 4920802           | ns                | rec    | UTI89_C5047 | -         | CDS  |
| S88                  | 4920817           | s                 | rec    | UTI89_C5047 | -         | CDS  |
| S88                  | 4920829           | s                 | rec    | UTI89_C5047 | -         | CDS  |
| S88                  | 4920830           | ns                | rec    | UTI89_C5047 | -         | CDS  |
| S88                  | 4920832           | ns                | rec    | UTI89_C5047 | -         | CDS  |
| S88                  | 4920833           | ns                | rec    | UTI89_C5047 | -         | CDS  |
| S88                  | 4920837           | ns                | rec    | UTI89_C5047 | -         | CDS  |
| S88                  | 4920838           | ns                | rec    | UTI89_C5047 | -         | CDS  |
| S88                  | 4920839           | ns                | rec    | UTI89_C5047 | -         | CDS  |
| S88                  | 4920842           | ns                | rec    | UTI89_C5047 | -         | CDS  |
| S88                  | 4920848           | ns                | rec    | UTI89_C5047 | -         | CDS  |
| S88                  | 4920851           | ns                | rec    | UTI89_C5047 | -         | CDS  |
| S88                  | 4920854           | ns                | rec    | UTI89_C5047 | -         | CDS  |



| lineage <sup>a</sup> | site <sup>b</sup> | mutation          |        | gene        | Gene name | Type |
|----------------------|-------------------|-------------------|--------|-------------|-----------|------|
|                      |                   | type <sup>c</sup> | recomb |             |           |      |
| S88                  | 4920855           | ns                | rec    | UTI89_C5047 | -         | CDS  |
| S88                  | 4920868           | nc                | rec    | intergenic  |           |      |
| S88                  | 4920886           | nc                | rec    | intergenic  |           |      |
| S88                  | 4920895           | nc                | rec    | intergenic  |           |      |
| S88                  | 4922933           | ns                | rec    | intergenic  |           |      |
| S88                  | 4922966           | s                 | rec    | intergenic  |           |      |
| S88                  | 4922981           | s                 | rec    | intergenic  |           |      |
| S88                  | 4923001           | ns                | rec    | intergenic  |           |      |
| S88                  | 4923017           | s                 | rec    | intergenic  |           |      |
| S88                  | 4923064           | ns                | rec    | intergenic  |           |      |
| S88                  | 4923066           | ns                | rec    | intergenic  |           |      |
| S88                  | 4923068           | s                 | rec    | intergenic  |           |      |
| S88                  | 4923074           | s                 | rec    | intergenic  |           |      |
| S88                  | 4923149           | s                 | rec    | intergenic  |           |      |
| S88                  | 4923158           | s                 | rec    | intergenic  |           |      |
| S88                  | 4923185           | s                 | rec    | intergenic  |           |      |
| S88                  | 4923188           | s                 | rec    | intergenic  |           |      |
| S88                  | 4923199           | ns                | rec    | intergenic  |           |      |
| S88                  | 4923300           | nc                | rec    | intergenic  |           |      |
| S88                  | 4923335           | nc                | rec    | intergenic  |           |      |
| S88                  | 4923336           | nc                | rec    | intergenic  |           |      |
| S88                  | 4923340           | nc                | rec    | intergenic  |           |      |
| S88                  | 4931867           | s                 | rec    | UTI89_C5055 | yjiA      | CDS  |
| S88                  | 4931887           | ns                | rec    | UTI89_C5055 | yjiA      | CDS  |
| S88                  | 4931921           | s                 | rec    | UTI89_C5055 | yjiA      | CDS  |
| S88                  | 4931948           | s                 | rec    | UTI89_C5055 | yjiA      | CDS  |
| S88                  | 4932152           | s                 | rec    | UTI89_C5055 | yjiA      | CDS  |
| S88                  | 4932167           | s                 | rec    | UTI89_C5055 | yjiA      | CDS  |
| S88                  | 4932173           | s                 | rec    | UTI89_C5055 | yjiA      | CDS  |
| S88                  | 4932176           | s                 | rec    | UTI89_C5055 | yjiA      | CDS  |
| S88                  | 4932245           | s                 | rec    | UTI89_C5055 | yjiA      | CDS  |
| S88                  | 4932272           | s                 | rec    | UTI89_C5055 | yjiA      | CDS  |
| S88                  | 4932308           | s                 | rec    | UTI89_C5055 | yjiA      | CDS  |
| S88                  | 4932312           | ns                | rec    | UTI89_C5055 | yjiA      | CDS  |
| S88                  | 4932353           | s                 | rec    | UTI89_C5055 | yjiA      | CDS  |
| S88                  | 4932362           | s                 | rec    | UTI89_C5055 | yjiA      | CDS  |
| S88                  | 4932449           | s                 | rec    | UTI89_C5055 | yjiA      | CDS  |
| S88                  | 4932509           | s                 | rec    | UTI89_C5055 | yjiA      | CDS  |
| S88                  | 4932563           | s                 | rec    | UTI89_C5055 | yjiA      | CDS  |
| S88                  | 4932581           | s                 | rec    | UTI89_C5055 | yjiA      | CDS  |
| S88                  | 4932587           | s                 | rec    | UTI89_C5055 | yjiA      | CDS  |
| S88                  | 4932677           | s                 | rec    | UTI89_C5055 | yjiA      | CDS  |
| S88                  | 4932725           | s                 | rec    | UTI89_C5055 | yjiA      | CDS  |
| S88                  | 4933160           | ns                | rec    | UTI89_C5057 | yjiY      | CDS  |
| S88                  | 4933161           | ns                | rec    | UTI89_C5057 | yjiY      | CDS  |

| lineage <sup>a</sup> | site <sup>b</sup> | mutation          |        | gene        | Gene name | Type |
|----------------------|-------------------|-------------------|--------|-------------|-----------|------|
|                      |                   | type <sup>c</sup> | recomb |             |           |      |
| S88                  | 4933162           | s                 | rec    | UTI89_C5057 | yjiY      | CDS  |
| S88                  | 4933225           | s                 | rec    | UTI89_C5057 | yjiY      | CDS  |
| S88                  | 4933264           | s                 | rec    | UTI89_C5057 | yjiY      | CDS  |
| S88                  | 4933324           | s                 | rec    | UTI89_C5057 | yjiY      | CDS  |
| S88                  | 4933411           | s                 | rec    | UTI89_C5057 | yjiY      | CDS  |
| S88                  | 4933417           | ns                | rec    | UTI89_C5057 | yjiY      | CDS  |
| S88                  | 4933419           | ns                | rec    | UTI89_C5057 | yjiY      | CDS  |
| S88                  | 4933423           | s                 | rec    | UTI89_C5057 | yjiY      | CDS  |
| S88                  | 4933426           | s                 | rec    | UTI89_C5057 | yjiY      | CDS  |
| S88                  | 4933462           | s                 | rec    | UTI89_C5057 | yjiY      | CDS  |
| S88                  | 4933486           | s                 | rec    | UTI89_C5057 | yjiY      | CDS  |
| S88                  | 4933609           | s                 | rec    | UTI89_C5057 | yjiY      | CDS  |
| S88                  | 4933654           | s                 | rec    | UTI89_C5057 | yjiY      | CDS  |
| S88                  | 4933801           | s                 | rec    | UTI89_C5057 | yjiY      | CDS  |
| S88                  | 4933822           | s                 | rec    | UTI89_C5057 | yjiY      | CDS  |
| S88                  | 4933828           | s                 | rec    | UTI89_C5057 | yjiY      | CDS  |
| S88                  | 4933957           | s                 | rec    | UTI89_C5057 | yjiY      | CDS  |
| S88                  | 4934017           | s                 | rec    | UTI89_C5057 | yjiY      | CDS  |
| S88                  | 4934164           | s                 | rec    | UTI89_C5057 | yjiY      | CDS  |
| S88                  | 4934173           | s                 | rec    | UTI89_C5057 | yjiY      | CDS  |
| S88                  | 4934446           | s                 | rec    | UTI89_C5057 | yjiY      | CDS  |
| S88                  | 4934458           | s                 | rec    | UTI89_C5057 | yjiY      | CDS  |
| S88                  | 4934641           | s                 | rec    | UTI89_C5057 | yjiY      | CDS  |
| S88                  | 4934680           | s                 | rec    | UTI89_C5057 | yjiY      | CDS  |
| S88                  | 4934686           | s                 | rec    | UTI89_C5057 | yjiY      | CDS  |
| S88                  | 4934788           | s                 | rec    | UTI89_C5057 | yjiY      | CDS  |
| S88                  | 4935091           | s                 | rec    | UTI89_C5057 | yjiY      | CDS  |
| S88                  | 4935123           | ns                | rec    | UTI89_C5057 | yjiY      | CDS  |
| S88                  | 4935190           | s                 | rec    | UTI89_C5057 | yjiY      | CDS  |
| S88                  | 4935312           | nc                | rec    | intergenic  |           |      |
| S88                  | 4935377           | nc                | rec    | intergenic  |           |      |
| S88                  | 4935390           | nc                | rec    | intergenic  |           |      |
| S88                  | 4935391           | nc                | rec    | intergenic  |           |      |
| S88                  | 4935392           | nc                | rec    | intergenic  |           |      |
| S88                  | 4935395           | nc                | rec    | intergenic  |           |      |
| S88                  | 4935396           | nc                | rec    | intergenic  |           |      |
| S88                  | 4935398           | nc                | rec    | intergenic  |           |      |
| S88                  | 4935427           | nc                | rec    | intergenic  |           |      |
| S88                  | 4935442           | nc                | rec    | intergenic  |           |      |
| S88                  | 4935462           | nc                | rec    | intergenic  |           |      |
| S88                  | 4935499           | nc                | rec    | intergenic  |           |      |
| S88                  | 4935501           | nc                | rec    | intergenic  |           |      |
| S88                  | 4935524           | nc                | rec    | intergenic  |           |      |
| S88                  | 4935538           | nc                | rec    | intergenic  |           |      |
| S88                  | 4935630           | s                 | rec    | UTI89_C5058 | tsr       | CDS  |

| lineage <sup>a</sup> | site <sup>b</sup> | mutation          |        | gene        | Gene name | Type |
|----------------------|-------------------|-------------------|--------|-------------|-----------|------|
|                      |                   | type <sup>c</sup> | recomb |             |           |      |
| S88                  | 4935671           | s                 | rec    | UTI89_C5058 | tsr       | CDS  |
| S88                  | 4935704           | s                 | rec    | UTI89_C5058 | tsr       | CDS  |
| S88                  | 4935776           | s                 | rec    | UTI89_C5058 | tsr       | CDS  |
| S88                  | 4935836           | s                 | rec    | UTI89_C5058 | tsr       | CDS  |
| S88                  | 4935873           | ns                | rec    | UTI89_C5058 | tsr       | CDS  |
| S88                  | 4936019           | s                 | rec    | UTI89_C5058 | tsr       | CDS  |
| S88                  | 4936131           | ns                | rec    | UTI89_C5058 | tsr       | CDS  |
| S88                  | 4936190           | s                 | rec    | UTI89_C5058 | tsr       | CDS  |
| S88                  | 4936221           | ns                | rec    | UTI89_C5058 | tsr       | CDS  |
| S88                  | 4936550           | s                 | rec    | UTI89_C5058 | tsr       | CDS  |
| S88                  | 4936556           | s                 | rec    | UTI89_C5058 | tsr       | CDS  |
| S88                  | 4936601           | s                 | rec    | UTI89_C5058 | tsr       | CDS  |
| S88                  | 4936622           | s                 | rec    | UTI89_C5058 | tsr       | CDS  |
| S88                  | 4936631           | s                 | rec    | UTI89_C5058 | tsr       | CDS  |
| S88                  | 4936649           | s                 | rec    | UTI89_C5058 | tsr       | CDS  |
| S88                  | 4936778           | s                 | rec    | UTI89_C5058 | tsr       | CDS  |
| S88                  | 4936826           | s                 | rec    | UTI89_C5058 | tsr       | CDS  |
| S88                  | 4936832           | s                 | rec    | UTI89_C5058 | tsr       | CDS  |
| S88                  | 4936838           | s                 | rec    | UTI89_C5058 | tsr       | CDS  |
| S88                  | 4936940           | s                 | rec    | UTI89_C5058 | tsr       | CDS  |
| S88                  | 4937078           | s                 | rec    | UTI89_C5058 | tsr       | CDS  |
| S88                  | 4937087           | s                 | rec    | UTI89_C5058 | tsr       | CDS  |
| S88                  | 4937108           | s                 | rec    | UTI89_C5058 | tsr       | CDS  |
| S88                  | 4937169           | ns                | rec    | UTI89_C5058 | tsr       | CDS  |
| S88                  | 4937202           | ns                | rec    | UTI89_C5058 | tsr       | CDS  |
| S88                  | 4937210           | s                 | rec    | UTI89_C5058 | tsr       | CDS  |
| S88                  | 4937249           | s                 | rec    | UTI89_C5058 | tsr       | CDS  |
| S88                  | 4938991           | s                 | rec    | intergenic  |           |      |
| S88                  | 4939012           | s                 | rec    | intergenic  |           |      |
| S88                  | 4939018           | s                 | rec    | intergenic  |           |      |
| S88                  | 4939021           | s                 | rec    | intergenic  |           |      |
| S88                  | 4939042           | s                 | rec    | intergenic  |           |      |
| S88                  | 4939054           | s                 | rec    | intergenic  |           |      |
| S88                  | 4939081           | s                 | rec    | intergenic  |           |      |
| S88                  | 4939084           | s                 | rec    | intergenic  |           |      |
| S88                  | 4939087           | s                 | rec    | intergenic  |           |      |
| S88                  | 4939090           | s                 | rec    | intergenic  |           |      |
| S88                  | 4939093           | s                 | rec    | intergenic  |           |      |
| S88                  | 4939099           | s                 | rec    | intergenic  |           |      |
| S88                  | 4939107           | ns                | rec    | intergenic  |           |      |
| S88                  | 4939117           | s                 | rec    | intergenic  |           |      |
| S88                  | 4939123           | s                 | rec    | intergenic  |           |      |
| S88                  | 4939129           | s                 | rec    | intergenic  |           |      |
| S88                  | 4939132           | s                 | rec    | intergenic  |           |      |
| S88                  | 4939134           | s                 | rec    | intergenic  |           |      |

| lineage <sup>a</sup> | site <sup>b</sup> | mutation          |        | gene       | Gene name | Type |
|----------------------|-------------------|-------------------|--------|------------|-----------|------|
|                      |                   | type <sup>c</sup> | recomb |            |           |      |
| S88                  | 4939138           | ns                | rec    | intergenic |           |      |
| S88                  | 4939140           | ns                | rec    | intergenic |           |      |
| S88                  | 4939143           | ns                | rec    | intergenic |           |      |
| S88                  | 4939144           | s                 | rec    | intergenic |           |      |
| S88                  | 4939153           | s                 | rec    | intergenic |           |      |
| S88                  | 4939155           | s                 | rec    | intergenic |           |      |
| S88                  | 4939159           | s                 | rec    | intergenic |           |      |
| S88                  | 4939161           | s                 | rec    | intergenic |           |      |
| S88                  | 4939165           | s                 | rec    | intergenic |           |      |
| S88                  | 4939168           | s                 | rec    | intergenic |           |      |
| S88                  | 4939174           | s                 | rec    | intergenic |           |      |
| S88                  | 4939181           | ns                | rec    | intergenic |           |      |
| S88                  | 4939183           | ns                | rec    | intergenic |           |      |
| S88                  | 4939184           | ns                | rec    | intergenic |           |      |
| S88                  | 4939189           | s                 | rec    | intergenic |           |      |
| S88                  | 4939193           | ns                | rec    | intergenic |           |      |
| S88                  | 4939198           | s                 | rec    | intergenic |           |      |
| S88                  | 4939203           | s                 | rec    | intergenic |           |      |
| S88                  | 4939205           | ns                | rec    | intergenic |           |      |
| S88                  | 4939206           | ns                | rec    | intergenic |           |      |
| S88                  | 4939209           | s                 | rec    | intergenic |           |      |
| S88                  | 4939210           | s                 | rec    | intergenic |           |      |
| S88                  | 4939239           | s                 | rec    | intergenic |           |      |
| S88                  | 4939246           | s                 | rec    | intergenic |           |      |
| S88                  | 4939249           | s                 | rec    | intergenic |           |      |
| S88                  | 4939254           | ns                | rec    | intergenic |           |      |
| S88                  | 4939258           | s                 | rec    | intergenic |           |      |
| S88                  | 4939261           | s                 | rec    | intergenic |           |      |
| S88                  | 4939276           | s                 | rec    | intergenic |           |      |
| S88                  | 4939279           | s                 | rec    | intergenic |           |      |
| S88                  | 4939282           | s                 | rec    | intergenic |           |      |
| S88                  | 4939342           | s                 | rec    | intergenic |           |      |
| S88                  | 4939357           | s                 | rec    | intergenic |           |      |
| S88                  | 4939375           | ns                | rec    | intergenic |           |      |
| S88                  | 4939393           | s                 | rec    | intergenic |           |      |
| S88                  | 4939402           | s                 | rec    | intergenic |           |      |
| S88                  | 4939416           | s                 | rec    | intergenic |           |      |
| S88                  | 4939420           | s                 | rec    | intergenic |           |      |
| S88                  | 4939423           | s                 | rec    | intergenic |           |      |
| S88                  | 4939429           | s                 | rec    | intergenic |           |      |
| S88                  | 4939435           | ns                | rec    | intergenic |           |      |
| S88                  | 4939437           | ns                | rec    | intergenic |           |      |
| S88                  | 4939438           | s                 | rec    | intergenic |           |      |
| S88                  | 4939441           | s                 | rec    | intergenic |           |      |
| S88                  | 4939444           | s                 | rec    | intergenic |           |      |

| lineage <sup>a</sup> | site <sup>b</sup> | mutation          |        | gene        | Gene name | Type |
|----------------------|-------------------|-------------------|--------|-------------|-----------|------|
|                      |                   | type <sup>c</sup> | recomb |             |           |      |
| S88                  | 4939447           | s                 | rec    | intergenic  |           |      |
| S88                  | 4939453           | s                 | rec    | intergenic  |           |      |
| S88                  | 4939456           | s                 | rec    | intergenic  |           |      |
| S88                  | 4939462           | s                 | rec    | intergenic  |           |      |
| S88                  | 4939468           | ns                | rec    | intergenic  |           |      |
| S88                  | 4939469           | ns                | rec    | intergenic  |           |      |
| S88                  | 4939474           | s                 | rec    | intergenic  |           |      |
| S88                  | 4939477           | ns                | rec    | intergenic  |           |      |
| S88                  | 4939479           | ns                | rec    | intergenic  |           |      |
| S88                  | 4939493           | ns                | rec    | intergenic  |           |      |
| S88                  | 4939498           | s                 | rec    | intergenic  |           |      |
| S88                  | 4939504           | s                 | rec    | intergenic  |           |      |
| S88                  | 4939513           | s                 | rec    | intergenic  |           |      |
| S88                  | 4940028           | s                 | rec    | UTI89_C5064 | -         | CDS  |
| S88                  | 4940037           | s                 | rec    | UTI89_C5064 | -         | CDS  |
| S88                  | 4940038           | ns                | rec    | UTI89_C5064 | -         | CDS  |
| S88                  | 4940058           | s                 | rec    | UTI89_C5064 | -         | CDS  |
| S88                  | 4940075           | ns                | rec    | UTI89_C5064 | -         | CDS  |
| S88                  | 4940076           | ns                | rec    | UTI89_C5064 | -         | CDS  |
| S88                  | 4940079           | s                 | rec    | UTI89_C5064 | -         | CDS  |
| S88                  | 4940085           | s                 | rec    | UTI89_C5064 | -         | CDS  |
| S88                  | 4940106           | s                 | rec    | UTI89_C5064 | -         | CDS  |
| S88                  | 4940137           | ns                | rec    | UTI89_C5064 | -         | CDS  |
| S88                  | 4940141           | ns                | rec    | UTI89_C5064 | -         | CDS  |
| S88                  | 4940142           | ns                | rec    | UTI89_C5064 | -         | CDS  |
| S88                  | 4940143           | ns                | rec    | UTI89_C5064 | -         | CDS  |
| S88                  | 4940144           | ns                | rec    | UTI89_C5064 | -         | CDS  |
| S88                  | 4940145           | ns                | rec    | UTI89_C5064 | -         | CDS  |
| S88                  | 4940148           | s                 | rec    | UTI89_C5064 | -         | CDS  |
| S88                  | 4940154           | s                 | rec    | UTI89_C5064 | -         | CDS  |
| S88                  | 4940158           | ns                | rec    | UTI89_C5064 | -         | CDS  |
| S88                  | 4940159           | ns                | rec    | UTI89_C5064 | -         | CDS  |
| S88                  | 4940160           | ns                | rec    | UTI89_C5064 | -         | CDS  |
| S88                  | 4940161           | ns                | rec    | UTI89_C5064 | -         | CDS  |
| S88                  | 4940164           | ns                | rec    | UTI89_C5064 | -         | CDS  |
| S88                  | 4940169           | ns                | rec    | UTI89_C5064 | -         | CDS  |
| S88                  | 4940171           | ns                | rec    | UTI89_C5064 | -         | CDS  |
| S88                  | 4940172           | ns                | rec    | UTI89_C5064 | -         | CDS  |
| S88                  | 4940175           | s                 | rec    | UTI89_C5064 | -         | CDS  |
| S88                  | 4940187           | s                 | rec    | UTI89_C5064 | -         | CDS  |
| S88                  | 4940190           | s                 | rec    | UTI89_C5064 | -         | CDS  |
| S88                  | 4940193           | s                 | rec    | UTI89_C5064 | -         | CDS  |
| S88                  | 4940196           | s                 | rec    | UTI89_C5064 | -         | CDS  |
| S88                  | 4940200           | ns                | rec    | UTI89_C5064 | -         | CDS  |
| S88                  | 4940203           | ns                | rec    | UTI89_C5064 | -         | CDS  |

| lineage <sup>a</sup> | site <sup>b</sup> | mutation          |        | gene        | Gene name | Type |
|----------------------|-------------------|-------------------|--------|-------------|-----------|------|
|                      |                   | type <sup>c</sup> | recomb |             |           |      |
| S88                  | 4940205           | ns                | rec    | UTI89_C5064 | -         | CDS  |
| S88                  | 4940235           | s                 | rec    | UTI89_C5064 | -         | CDS  |
| APEC                 | 4974091           | ns                |        | UTI89_C5064 | -         | CDS  |
| APEC                 | 4974109           | s                 |        | UTI89_C5064 | -         | CDS  |
| S88                  | 4940403           | s                 | rec    | UTI89_C5064 | -         | CDS  |
| S88                  | 4940415           | s                 | rec    | UTI89_C5064 | -         | CDS  |
| S88                  | 4940419           | ns                | rec    | UTI89_C5064 | -         | CDS  |
| S88                  | 4940493           | s                 | rec    | UTI89_C5064 | -         | CDS  |
| S88                  | 4940526           | s                 | rec    | UTI89_C5064 | -         | CDS  |
| S88                  | 4940560           | ns                | rec    | UTI89_C5064 | -         | CDS  |
| S88                  | 4940562           | ns                | rec    | UTI89_C5064 | -         | CDS  |
| S88                  | 4940598           | s                 | rec    | UTI89_C5064 | -         | CDS  |
| S88                  | 4940637           | s                 | rec    | UTI89_C5064 | -         | CDS  |
| S88                  | 4940676           | s                 | rec    | UTI89_C5064 | -         | CDS  |
| S88                  | 4940680           | s                 | rec    | UTI89_C5064 | -         | CDS  |
| S88                  | 4940808           | s                 | rec    | UTI89_C5064 | -         | CDS  |
| S88                  | 4940824           | s                 | rec    | UTI89_C5064 | -         | CDS  |
| S88                  | 4940838           | s                 | rec    | UTI89_C5064 | -         | CDS  |
| S88                  | 4940850           | s                 | rec    | UTI89_C5064 | -         | CDS  |
| S88                  | 4940931           | s                 | rec    | UTI89_C5064 | -         | CDS  |
| S88                  | 4940937           | s                 | rec    | UTI89_C5064 | -         | CDS  |
| S88                  | 4940971           | nc                | rec    | intergenic  |           |      |
| S88                  | 4941024           | nc                | rec    | intergenic  |           |      |
| S88                  | 4941033           | nc                | rec    | intergenic  |           |      |
| S88                  | 4941039           | nc                | rec    | intergenic  |           |      |
| S88                  | 4941044           | nc                | rec    | intergenic  |           |      |
| S88                  | 4941051           | nc                | rec    | intergenic  |           |      |
| S88                  | 4941065           | nc                | rec    | intergenic  |           |      |
| S88                  | 4941066           | nc                | rec    | intergenic  |           |      |
| S88                  | 4941156           | s                 | rec    | UTI89_C5065 | mdoB      | CDS  |
| S88                  | 4941195           | s                 | rec    | UTI89_C5065 | mdoB      | CDS  |
| S88                  | 4941276           | s                 | rec    | UTI89_C5065 | mdoB      | CDS  |
| S88                  | 4941411           | s                 | rec    | UTI89_C5065 | mdoB      | CDS  |
| S88                  | 4941438           | s                 | rec    | UTI89_C5065 | mdoB      | CDS  |
| S88                  | 4941444           | s                 | rec    | UTI89_C5065 | mdoB      | CDS  |
| S88                  | 4941483           | s                 | rec    | UTI89_C5065 | mdoB      | CDS  |
| S88                  | 4941540           | s                 | rec    | UTI89_C5065 | mdoB      | CDS  |
| S88                  | 4941603           | s                 | rec    | UTI89_C5065 | mdoB      | CDS  |
| S88                  | 4941608           | ns                | rec    | UTI89_C5065 | mdoB      | CDS  |
| S88                  | 4941613           | ns                | rec    | UTI89_C5065 | mdoB      | CDS  |
| S88                  | 4941617           | ns                | rec    | UTI89_C5065 | mdoB      | CDS  |
| S88                  | 4941684           | s                 | rec    | UTI89_C5065 | mdoB      | CDS  |
| S88                  | 4941765           | s                 | rec    | UTI89_C5065 | mdoB      | CDS  |
| S88                  | 4941867           | s                 | rec    | UTI89_C5065 | mdoB      | CDS  |
| S88                  | 4941948           | s                 | rec    | UTI89_C5065 | mdoB      | CDS  |

| lineage <sup>a</sup> | site <sup>b</sup> | mutation          |        | gene        | Gene name | Type |
|----------------------|-------------------|-------------------|--------|-------------|-----------|------|
|                      |                   | type <sup>c</sup> | recomb |             |           |      |
| S88                  | 4942023           | s                 | rec    | UTI89_C5065 | mdoB      | CDS  |
| S88                  | 4942086           | s                 | rec    | UTI89_C5065 | mdoB      | CDS  |
| S88                  | 4942131           | s                 | rec    | UTI89_C5065 | mdoB      | CDS  |
| S88                  | 4942167           | s                 | rec    | UTI89_C5065 | mdoB      | CDS  |
| S88                  | 4942185           | s                 | rec    | UTI89_C5065 | mdoB      | CDS  |
| S88                  | 4942272           | s                 | rec    | UTI89_C5065 | mdoB      | CDS  |
| S88                  | 4942275           | s                 | rec    | UTI89_C5065 | mdoB      | CDS  |
| S88                  | 4942317           | s                 | rec    | UTI89_C5065 | mdoB      | CDS  |
| S88                  | 4942353           | s                 | rec    | UTI89_C5065 | mdoB      | CDS  |
| S88                  | 4942356           | s                 | rec    | UTI89_C5065 | mdoB      | CDS  |
| S88                  | 4942440           | s                 | rec    | UTI89_C5065 | mdoB      | CDS  |
| S88                  | 4942509           | s                 | rec    | UTI89_C5065 | mdoB      | CDS  |
| S88                  | 4942554           | s                 | rec    | UTI89_C5065 | mdoB      | CDS  |
| S88                  | 4942560           | s                 | rec    | UTI89_C5065 | mdoB      | CDS  |
| S88                  | 4942637           | ns                | rec    | UTI89_C5065 | mdoB      | CDS  |
| S88                  | 4942638           | s                 | rec    | UTI89_C5065 | mdoB      | CDS  |
| S88                  | 4942644           | s                 | rec    | UTI89_C5065 | mdoB      | CDS  |
| S88                  | 4942677           | s                 | rec    | UTI89_C5065 | mdoB      | CDS  |
| S88                  | 4942683           | s                 | rec    | UTI89_C5065 | mdoB      | CDS  |
| S88                  | 4942704           | s                 | rec    | UTI89_C5065 | mdoB      | CDS  |
| S88                  | 4942761           | s                 | rec    | UTI89_C5065 | mdoB      | CDS  |
| S88                  | 4942767           | s                 | rec    | UTI89_C5065 | mdoB      | CDS  |
| S88                  | 4943016           | s                 | rec    | UTI89_C5065 | mdoB      | CDS  |
| S88                  | 4943022           | s                 | rec    | UTI89_C5065 | mdoB      | CDS  |
| S88                  | 4943043           | s                 | rec    | UTI89_C5065 | mdoB      | CDS  |
| S88                  | 4943079           | s                 | rec    | UTI89_C5065 | mdoB      | CDS  |
| S88                  | 4943121           | ns                | rec    | UTI89_C5065 | mdoB      | CDS  |
| S88                  | 4943123           | ns                | rec    | UTI89_C5065 | mdoB      | CDS  |
| S88                  | 4943148           | s                 | rec    | UTI89_C5065 | mdoB      | CDS  |
| S88                  | 4943153           | s                 | rec    | UTI89_C5065 | mdoB      | CDS  |
| S88                  | 4943154           | s                 | rec    | UTI89_C5065 | mdoB      | CDS  |
| AS                   | 4976994           | s                 |        | UTI89_C5065 | mdoB      | CDS  |
| S88                  | 4943283           | s                 | rec    | UTI89_C5065 | mdoB      | CDS  |
| S88                  | 4943292           | s                 | rec    | UTI89_C5065 | mdoB      | CDS  |
| S88                  | 4943532           | nc                | rec    | intergenic  |           |      |
| S88                  | 4943533           | nc                | rec    | intergenic  |           |      |
| S88                  | 4943539           | nc                | rec    | intergenic  |           |      |
| S88                  | 4943662           | s                 | rec    | UTI89_C5066 | yjjA      | CDS  |
| S88                  | 4943713           | s                 | rec    | UTI89_C5066 | yjjA      | CDS  |
| S88                  | 4943719           | s                 | rec    | UTI89_C5066 | yjjA      | CDS  |
| S88                  | 4943722           | s                 | rec    | UTI89_C5066 | yjjA      | CDS  |
| S88                  | 4943776           | s                 | rec    | UTI89_C5066 | yjjA      | CDS  |
| S88                  | 4943824           | s                 | rec    | UTI89_C5066 | yjjA      | CDS  |
| S88                  | 4943833           | s                 | rec    | UTI89_C5066 | yjjA      | CDS  |
| S88                  | 4943839           | s                 | rec    | UTI89_C5066 | yjjA      | CDS  |

| lineage <sup>a</sup> | site <sup>b</sup> | mutation          |        | gene        | Gene name | Type |
|----------------------|-------------------|-------------------|--------|-------------|-----------|------|
|                      |                   | type <sup>c</sup> | recomb |             |           |      |
| S88                  | 4943869           | s                 | rec    | UTI89_C5066 | yjjA      | CDS  |
| S88                  | 4943911           | s                 | rec    | UTI89_C5066 | yjjA      | CDS  |
| S88                  | 4943944           | s                 | rec    | UTI89_C5066 | yjjA      | CDS  |
| S88                  | 4943948           | ns                | rec    | UTI89_C5066 | yjjA      | CDS  |
| S88                  | 4944002           | ns                | rec    | UTI89_C5066 | yjjA      | CDS  |
| S88                  | 4944120           | ns                | rec    | UTI89_C5066 | yjjA      | CDS  |
| S88                  | 4944146           | nc                | rec    | intergenic  |           |      |
| S88                  | 4944202           | s                 | rec    | UTI89_C5067 | dnaC      | CDS  |
| S88                  | 4944436           | s                 | rec    | UTI89_C5067 | dnaC      | CDS  |
| S88                  | 4944601           | s                 | rec    | UTI89_C5067 | dnaC      | CDS  |
| S88                  | 4944676           | s                 | rec    | UTI89_C5067 | dnaC      | CDS  |
| S88                  | 4944712           | s                 | rec    | UTI89_C5067 | dnaC      | CDS  |
| S88                  | 4944808           | s                 | rec    | UTI89_C5067 | dnaC      | CDS  |
| S88                  | 4944820           | s                 | rec    | UTI89_C5067 | dnaC      | CDS  |
| S88                  | 4944834           | s                 | rec    | UTI89_C5067 | dnaC      | CDS  |
| S88                  | 4944853           | s                 | rec    | UTI89_C5067 | dnaC      | CDS  |
| S88                  | 4944856           | s                 | rec    | UTI89_C5067 | dnaC      | CDS  |
| S88                  | 4944960           | s                 | rec    | UTI89_C5068 | dnaT      | CDS  |
| S88                  | 4945065           | s                 | rec    | UTI89_C5068 | dnaT      | CDS  |
| S88                  | 4945095           | s                 | rec    | UTI89_C5068 | dnaT      | CDS  |
| S88                  | 4945109           | ns                | rec    | UTI89_C5068 | dnaT      | CDS  |
| S88                  | 4945118           | ns                | rec    | UTI89_C5068 | dnaT      | CDS  |
| S88                  | 4945128           | s                 | rec    | UTI89_C5068 | dnaT      | CDS  |
| S88                  | 4945161           | s                 | rec    | UTI89_C5068 | dnaT      | CDS  |
| S88                  | 4945182           | s                 | rec    | UTI89_C5068 | dnaT      | CDS  |
| S88                  | 4945185           | s                 | rec    | UTI89_C5068 | dnaT      | CDS  |
| S88                  | 4945194           | s                 | rec    | UTI89_C5068 | dnaT      | CDS  |
| S88                  | 4945212           | s                 | rec    | UTI89_C5068 | dnaT      | CDS  |
| S88                  | 4945226           | ns                | rec    | UTI89_C5068 | dnaT      | CDS  |
| S88                  | 4945323           | s                 | rec    | UTI89_C5068 | dnaT      | CDS  |
| S88                  | 4945328           | ns                | rec    | UTI89_C5068 | dnaT      | CDS  |
| S88                  | 4945547           | nc                | rec    | intergenic  |           |      |
| S88                  | 4945557           | nc                | rec    | intergenic  |           |      |
| S88                  | 4945698           | s                 | rec    | UTI89_C5069 | yjjB      | CDS  |
| S88                  | 4945738           | s                 | rec    | UTI89_C5069 | yjjB      | CDS  |
| S88                  | 4945747           | s                 | rec    | UTI89_C5069 | yjjB      | CDS  |
| S88                  | 4945765           | s                 | rec    | UTI89_C5069 | yjjB      | CDS  |
| S88                  | 4945828           | s                 | rec    | UTI89_C5069 | yjjB      | CDS  |
| S88                  | 4945843           | s                 | rec    | UTI89_C5069 | yjjB      | CDS  |
| S88                  | 4945861           | s                 | rec    | UTI89_C5069 | yjjB      | CDS  |
| S88                  | 4945872           | s                 | rec    | UTI89_C5069 | yjjB      | CDS  |
| S88                  | 4945885           | s                 | rec    | UTI89_C5069 | yjjB      | CDS  |
| S88                  | 4945914           | ns                | rec    | UTI89_C5069 | yjjB      | CDS  |
| S88                  | 4945915           | s                 | rec    | UTI89_C5069 | yjjB      | CDS  |
| S88                  | 4945942           | s                 | rec    | UTI89_C5069 | yjjB      | CDS  |



| lineage <sup>a</sup> | site <sup>b</sup> | mutation          |        | gene        | Gene name | Type |
|----------------------|-------------------|-------------------|--------|-------------|-----------|------|
|                      |                   | type <sup>c</sup> | recomb |             |           |      |
| S88                  | 4945945           | s                 | rec    | UT189_C5069 | yjjB      | CDS  |
| S88                  | 4946070           | s                 | rec    | UT189_C5070 | yjjP      | CDS  |
| S88                  | 4946082           | s                 | rec    | UT189_C5070 | yjjP      | CDS  |
| S88                  | 4946112           | s                 | rec    | UT189_C5070 | yjjP      | CDS  |
| S88                  | 4946169           | s                 | rec    | UT189_C5070 | yjjP      | CDS  |
| S88                  | 4946190           | s                 | rec    | UT189_C5070 | yjjP      | CDS  |
| S88                  | 4946244           | s                 | rec    | UT189_C5070 | yjjP      | CDS  |
| S88                  | 4946289           | s                 | rec    | UT189_C5070 | yjjP      | CDS  |
| S88                  | 4946354           | ns                | rec    | UT189_C5070 | yjjP      | CDS  |
| S88                  | 4946364           | ns                | rec    | UT189_C5070 | yjjP      | CDS  |
| S88                  | 4946366           | ns                | rec    | UT189_C5070 | yjjP      | CDS  |
| S88                  | 4946397           | ns                | rec    | UT189_C5070 | yjjP      | CDS  |
| S88                  | 4946424           | s                 | rec    | UT189_C5070 | yjjP      | CDS  |
| S88                  | 4946529           | s                 | rec    | UT189_C5070 | yjjP      | CDS  |
| S88                  | 4946535           | s                 | rec    | UT189_C5070 | yjjP      | CDS  |
| S88                  | 4946625           | s                 | rec    | UT189_C5070 | yjjP      | CDS  |
| S88                  | 4946681           | s                 | rec    | UT189_C5070 | yjjP      | CDS  |
| S88                  | 4946682           | s                 | rec    | UT189_C5070 | yjjP      | CDS  |
| S88                  | 4946931           | nc                | rec    | intergenic  |           |      |
| S88                  | 4946965           | nc                | rec    | intergenic  |           |      |
| S88                  | 4946978           | nc                | rec    | intergenic  |           |      |
| S88                  | 4946993           | nc                | rec    | intergenic  |           |      |
| S88                  | 4946994           | nc                | rec    | intergenic  |           |      |
| S88                  | 4947006           | nc                | rec    | intergenic  |           |      |
| S88                  | 4947009           | nc                | rec    | intergenic  |           |      |
| S88                  | 4947024           | nc                | rec    | intergenic  |           |      |
| S88                  | 4947040           | nc                | rec    | intergenic  |           |      |
| S88                  | 4947042           | nc                | rec    | intergenic  |           |      |
| S88                  | 4947047           | nc                | rec    | intergenic  |           |      |
| S88                  | 4947056           | nc                | rec    | intergenic  |           |      |
| S88                  | 4947068           | nc                | rec    | intergenic  |           |      |
| S88                  | 4947085           | nc                | rec    | intergenic  |           |      |
| S88                  | 4947101           | nc                | rec    | intergenic  |           |      |
| S88                  | 4947112           | nc                | rec    | intergenic  |           |      |
| S88                  | 4947113           | nc                | rec    | intergenic  |           |      |
| S88                  | 4947117           | nc                | rec    | intergenic  |           |      |
| S88                  | 4947129           | nc                | rec    | intergenic  |           |      |
| S88                  | 4947135           | nc                | rec    | intergenic  |           |      |
| S88                  | 4947160           | nc                | rec    | intergenic  |           |      |
| S88                  | 4947185           | nc                | rec    | intergenic  |           |      |
| S88                  | 4947356           | nc                | rec    | intergenic  |           |      |
| S88                  | 4947372           | nc                | rec    | intergenic  |           |      |
| S88                  | 4947373           | nc                | rec    | intergenic  |           |      |
| S88                  | 4947375           | nc                | rec    | intergenic  |           |      |
| S88                  | 4947391           | nc                | rec    | intergenic  |           |      |

| lineage <sup>a</sup> | site <sup>b</sup> | mutation          |        | gene        | Gene name | Type |
|----------------------|-------------------|-------------------|--------|-------------|-----------|------|
|                      |                   | type <sup>c</sup> | recomb |             |           |      |
| S88                  | 4947596           | s                 | rec    | UTI89_C5071 | yjjQ      | CDS  |
| S88                  | 4947623           | s                 | rec    | UTI89_C5071 | yjjQ      | CDS  |
| S88                  | 4947632           | s                 | rec    | UTI89_C5071 | yjjQ      | CDS  |
| S88                  | 4947641           | s                 | rec    | UTI89_C5071 | yjjQ      | CDS  |
| S88                  | 4947717           | s                 | rec    | UTI89_C5071 | yjjQ      | CDS  |
| S88                  | 4947804           | ns                | rec    | UTI89_C5071 | yjjQ      | CDS  |
| S88                  | 4947833           | s                 | rec    | UTI89_C5071 | yjjQ      | CDS  |
| S88                  | 4947974           | s                 | rec    | UTI89_C5071 | yjjQ      | CDS  |
| S88                  | 4948163           | ns                | rec    | UTI89_C5072 | bglJ      | CDS  |
| S88                  | 4948198           | s                 | rec    | UTI89_C5072 | bglJ      | CDS  |
| S88                  | 4948273           | s                 | rec    | UTI89_C5072 | bglJ      | CDS  |
| S88                  | 4948308           | ns                | rec    | UTI89_C5072 | bglJ      | CDS  |
| S88                  | 4948327           | s                 | rec    | UTI89_C5072 | bglJ      | CDS  |
| S88                  | 4948519           | s                 | rec    | UTI89_C5072 | bglJ      | CDS  |
| S88                  | 4948645           | s                 | rec    | UTI89_C5072 | bglJ      | CDS  |
| S88                  | 4948702           | s                 | rec    | UTI89_C5072 | bglJ      | CDS  |
| S88                  | 4948774           | s                 | rec    | UTI89_C5072 | bglJ      | CDS  |
| S88                  | 4948905           | s                 | rec    | UTI89_C5073 | fhuF      | CDS  |
| S88                  | 4948908           | s                 | rec    | UTI89_C5073 | fhuF      | CDS  |
| S88                  | 4948942           | ns                | rec    | UTI89_C5073 | fhuF      | CDS  |
| S88                  | 4948944           | s                 | rec    | UTI89_C5073 | fhuF      | CDS  |
| S88                  | 4948947           | s                 | rec    | UTI89_C5073 | fhuF      | CDS  |
| S88                  | 4948973           | ns                | rec    | UTI89_C5073 | fhuF      | CDS  |
| S88                  | 4948989           | s                 | rec    | UTI89_C5073 | fhuF      | CDS  |
| S88                  | 4948992           | s                 | rec    | UTI89_C5073 | fhuF      | CDS  |
| S88                  | 4949007           | s                 | rec    | UTI89_C5073 | fhuF      | CDS  |
| S88                  | 4949010           | s                 | rec    | UTI89_C5073 | fhuF      | CDS  |
| S88                  | 4949022           | s                 | rec    | UTI89_C5073 | fhuF      | CDS  |
| S88                  | 4949052           | s                 | rec    | UTI89_C5073 | fhuF      | CDS  |
| S88                  | 4949073           | s                 | rec    | UTI89_C5073 | fhuF      | CDS  |
| S88                  | 4949082           | s                 | rec    | UTI89_C5073 | fhuF      | CDS  |
| S88                  | 4949085           | s                 | rec    | UTI89_C5073 | fhuF      | CDS  |
| S88                  | 4949097           | s                 | rec    | UTI89_C5073 | fhuF      | CDS  |
| S88                  | 4949102           | ns                | rec    | UTI89_C5073 | fhuF      | CDS  |
| S88                  | 4949142           | ns                | rec    | UTI89_C5073 | fhuF      | CDS  |
| S88                  | 4949158           | ns                | rec    | UTI89_C5073 | fhuF      | CDS  |
| S88                  | 4949203           | ns                | rec    | UTI89_C5073 | fhuF      | CDS  |
| S88                  | 4949227           | ns                | rec    | UTI89_C5073 | fhuF      | CDS  |
| S88                  | 4949229           | s                 | rec    | UTI89_C5073 | fhuF      | CDS  |
| S88                  | 4949234           | ns                | rec    | UTI89_C5073 | fhuF      | CDS  |
| S88                  | 4949259           | s                 | rec    | UTI89_C5073 | fhuF      | CDS  |
| S88                  | 4949268           | s                 | rec    | UTI89_C5073 | fhuF      | CDS  |
| S88                  | 4949274           | s                 | rec    | UTI89_C5073 | fhuF      | CDS  |
| S88                  | 4949295           | s                 | rec    | UTI89_C5073 | fhuF      | CDS  |
| S88                  | 4949319           | s                 | rec    | UTI89_C5073 | fhuF      | CDS  |

| lineage <sup>a</sup> | site <sup>b</sup> | mutation          |        | gene        | Gene name | Type |
|----------------------|-------------------|-------------------|--------|-------------|-----------|------|
|                      |                   | type <sup>c</sup> | recomb |             |           |      |
| S88                  | 4949325           | s                 | rec    | UTI89_C5073 | fhuF      | CDS  |
| S88                  | 4949334           | s                 | rec    | UTI89_C5073 | fhuF      | CDS  |
| S88                  | 4949346           | s                 | rec    | UTI89_C5073 | fhuF      | CDS  |
| S88                  | 4949360           | ns                | rec    | UTI89_C5073 | fhuF      | CDS  |
| S88                  | 4949361           | s                 | rec    | UTI89_C5073 | fhuF      | CDS  |
| S88                  | 4949373           | s                 | rec    | UTI89_C5073 | fhuF      | CDS  |
| S88                  | 4949397           | s                 | rec    | UTI89_C5073 | fhuF      | CDS  |
| S88                  | 4949400           | s                 | rec    | UTI89_C5073 | fhuF      | CDS  |
| S88                  | 4949413           | ns                | rec    | UTI89_C5073 | fhuF      | CDS  |
| S88                  | 4949460           | s                 | rec    | UTI89_C5073 | fhuF      | CDS  |
| S88                  | 4949504           | ns                | rec    | UTI89_C5073 | fhuF      | CDS  |
| S88                  | 4949505           | s                 | rec    | UTI89_C5073 | fhuF      | CDS  |
| S88                  | 4949514           | s                 | rec    | UTI89_C5073 | fhuF      | CDS  |
| S88                  | 4949529           | s                 | rec    | UTI89_C5073 | fhuF      | CDS  |
| S88                  | 4949536           | ns                | rec    | UTI89_C5073 | fhuF      | CDS  |
| S88                  | 4949537           | ns                | rec    | UTI89_C5073 | fhuF      | CDS  |
| S88                  | 4949538           | ns                | rec    | UTI89_C5073 | fhuF      | CDS  |
| S88                  | 4949540           | ns                | rec    | UTI89_C5073 | fhuF      | CDS  |
| S88                  | 4949571           | s                 | rec    | UTI89_C5073 | fhuF      | CDS  |
| S88                  | 4949612           | nc                | rec    | intergenic  |           |      |
| S88                  | 4949634           | nc                | rec    | intergenic  |           |      |
| S88                  | 4949648           | ns                | rec    | UTI89_C5074 | -         | CDS  |
| S88                  | 4949673           | ns                | rec    | UTI89_C5074 | -         | CDS  |
| S88                  | 4949678           | ns                | rec    | UTI89_C5074 | -         | CDS  |
| AS                   | 4983543           | s                 |        | UTI89_C5074 | -         | CDS  |
| S88                  | 4949745           | ns                | rec    | UTI89_C5074 | -         | CDS  |
| S88                  | 4949831           | ns                | rec    | UTI89_C5074 | -         | CDS  |
| S88                  | 4949833           | ns                | rec    | UTI89_C5074 | -         | CDS  |
| S88                  | 4949839           | s                 | rec    | UTI89_C5074 | -         | CDS  |
| S88                  | 4949866           | s                 | rec    | UTI89_C5074 | -         | CDS  |
| S88                  | 4949879           | ns                | rec    | UTI89_C5074 | -         | CDS  |
| S88                  | 4949902           | s                 | rec    | UTI89_C5074 | -         | CDS  |
| S88                  | 4949912           | ns                | rec    | UTI89_C5074 | -         | CDS  |
| S88                  | 4949935           | s                 | rec    | UTI89_C5074 | -         | CDS  |
| S88                  | 4949980           | s                 | rec    | UTI89_C5074 | -         | CDS  |
| S88                  | 4949984           | nc                | rec    | intergenic  |           |      |
| S88                  | 4949988           | nc                | rec    | intergenic  |           |      |
| S88                  | 4949991           | nc                | rec    | intergenic  |           |      |
| S88                  | 4949992           | nc                | rec    | intergenic  |           |      |
| S88                  | 4949995           | nc                | rec    | intergenic  |           |      |
| S88                  | 4949998           | nc                | rec    | intergenic  |           |      |
| S88                  | 4950007           | nc                | rec    | intergenic  |           |      |
| APEC                 | 4983865           | nc                |        | intergenic  |           |      |
| S88                  | 4950452           | ns                | rec    | UTI89_C5078 | -         | CDS  |
| S88                  | 4950561           | ns                | rec    | UTI89_C5078 | -         | CDS  |

| lineage <sup>a</sup> | site <sup>b</sup> | mutation          |        | gene        | Gene name | Type |
|----------------------|-------------------|-------------------|--------|-------------|-----------|------|
|                      |                   | type <sup>c</sup> | recomb |             |           |      |
| S88                  | 4950566           | ns                | rec    | UTI89_C5078 | -         | CDS  |
| S88                  | 4950577           | ns                | rec    | UTI89_C5078 | -         | CDS  |
| S88                  | 4950578           | ns                | rec    | UTI89_C5078 | -         | CDS  |
| S88                  | 4950600           | ns                | rec    | UTI89_C5078 | -         | CDS  |
| S88                  | 4950611           | nc                | rec    | intergenic  |           |      |
| S88                  | 4950613           | s                 | rec    | UTI89_C5079 | yjjT      | CDS  |
| S88                  | 4950666           | s                 | rec    | UTI89_C5079 | yjjT      | CDS  |
| S88                  | 4950684           | s                 | rec    | UTI89_C5079 | yjjT      | CDS  |
| S88                  | 4950717           | s                 | rec    | UTI89_C5079 | yjjT      | CDS  |
| S88                  | 4950749           | s                 | rec    | UTI89_C5079 | yjjT      | CDS  |
| S88                  | 4950762           | s                 | rec    | UTI89_C5079 | yjjT      | CDS  |
| S88                  | 4950765           | s                 | rec    | UTI89_C5079 | yjjT      | CDS  |
| S88                  | 4950780           | s                 | rec    | UTI89_C5079 | yjjT      | CDS  |
| S88                  | 4950801           | s                 | rec    | UTI89_C5079 | yjjT      | CDS  |
| S88                  | 4950849           | s                 | rec    | UTI89_C5079 | yjjT      | CDS  |
| S88                  | 4950861           | s                 | rec    | UTI89_C5079 | yjjT      | CDS  |
| S88                  | 4950920           | ns                | rec    | UTI89_C5079 | yjjT      | CDS  |
| S88                  | 4950951           | s                 | rec    | UTI89_C5079 | yjjT      | CDS  |
| S88                  | 4950954           | s                 | rec    | UTI89_C5079 | yjjT      | CDS  |
| S88                  | 4950960           | s                 | rec    | UTI89_C5079 | yjjT      | CDS  |
| S88                  | 4950966           | s                 | rec    | UTI89_C5079 | yjjT      | CDS  |
| S88                  | 4950971           | s                 | rec    | UTI89_C5079 | yjjT      | CDS  |
| S88                  | 4950972           | s                 | rec    | UTI89_C5079 | yjjT      | CDS  |
| S88                  | 4950978           | s                 | rec    | UTI89_C5079 | yjjT      | CDS  |
| S88                  | 4950981           | s                 | rec    | UTI89_C5079 | yjjT      | CDS  |
| S88                  | 4950984           | s                 | rec    | UTI89_C5079 | yjjT      | CDS  |
| S88                  | 4950990           | s                 | rec    | UTI89_C5079 | yjjT      | CDS  |
| S88                  | 4951005           | s                 | rec    | UTI89_C5079 | yjjT      | CDS  |
| S88                  | 4951011           | s                 | rec    | UTI89_C5079 | yjjT      | CDS  |
| S88                  | 4951020           | s                 | rec    | UTI89_C5079 | yjjT      | CDS  |
| S88                  | 4951029           | s                 | rec    | UTI89_C5079 | yjjT      | CDS  |
| S88                  | 4951062           | s                 | rec    | UTI89_C5079 | yjjT      | CDS  |
| S88                  | 4951070           | s                 | rec    | UTI89_C5079 | yjjT      | CDS  |
| S88                  | 4951089           | s                 | rec    | UTI89_C5079 | yjjT      | CDS  |
| S88                  | 4951092           | s                 | rec    | UTI89_C5079 | yjjT      | CDS  |
| S88                  | 4951125           | s                 | rec    | UTI89_C5079 | yjjT      | CDS  |
| S88                  | 4951131           | s                 | rec    | UTI89_C5079 | yjjT      | CDS  |
| S88                  | 4951145           | s                 | rec    | UTI89_C5079 | yjjT      | CDS  |
| S88                  | 4951176           | ns                | rec    | UTI89_C5079 | yjjT      | CDS  |
| S88                  | 4951178           | ns                | rec    | UTI89_C5079 | yjjT      | CDS  |
| S88                  | 4951179           | s                 | rec    | UTI89_C5079 | yjjT      | CDS  |
| S88                  | 4951197           | s                 | rec    | UTI89_C5079 | yjjT      | CDS  |
| S88                  | 4951224           | s                 | rec    | UTI89_C5079 | yjjT      | CDS  |
| S88                  | 4951233           | s                 | rec    | UTI89_C5079 | yjjT      | CDS  |
| S88                  | 4951242           | s                 | rec    | UTI89_C5079 | yjjT      | CDS  |

| lineage <sup>a</sup> | site <sup>b</sup> | mutation          |        | gene        | Gene name | Type |
|----------------------|-------------------|-------------------|--------|-------------|-----------|------|
|                      |                   | type <sup>c</sup> | recomb |             |           |      |
| S88                  | 4951245           | s                 | rec    | UTI89_C5079 | yjjT      | CDS  |
| S88                  | 4951266           | s                 | rec    | UTI89_C5079 | yjjT      | CDS  |
| S88                  | 4951285           | ns                | rec    | UTI89_C5079 | yjjT      | CDS  |
| S88                  | 4951326           | s                 | rec    | UTI89_C5079 | yjjT      | CDS  |
| S88                  | 4951329           | s                 | rec    | UTI89_C5079 | yjjT      | CDS  |
| S88                  | 4951335           | s                 | rec    | UTI89_C5079 | yjjT      | CDS  |
| S88                  | 4951338           | s                 | rec    | UTI89_C5079 | yjjT      | CDS  |
| S88                  | 4951401           | s                 | rec    | UTI89_C5079 | yjjT      | CDS  |
| S88                  | 4951425           | s                 | rec    | UTI89_C5079 | yjjT      | CDS  |
| S88                  | 4951430           | ns                | rec    | UTI89_C5079 | yjjT      | CDS  |
| S88                  | 4951446           | s                 | rec    | UTI89_C5079 | yjjT      | CDS  |
| S88                  | 4951449           | s                 | rec    | UTI89_C5079 | yjjT      | CDS  |
| S88                  | 4951482           | s                 | rec    | UTI89_C5079 | yjjT      | CDS  |
| S88                  | 4951848           | ns                | rec    | UTI89_C5081 | hold      | CDS  |
| S88                  | 4951895           | ns                | rec    | UTI89_C5081 | hold      | CDS  |
| S88                  | 4951902           | ns                | rec    | UTI89_C5081 | hold      | CDS  |
| S88                  | 4951904           | ns                | rec    | UTI89_C5081 | hold      | CDS  |
| S88                  | 4951922           | ns                | rec    | UTI89_C5081 | hold      | CDS  |
| S88                  | 4951925           | ns                | rec    | UTI89_C5081 | hold      | CDS  |
| S88                  | 4951931           | ns                | rec    | UTI89_C5081 | hold      | CDS  |
| S88                  | 4951943           | ns                | rec    | UTI89_C5081 | hold      | CDS  |
| S88                  | 4951946           | ns                | rec    | UTI89_C5081 | hold      | CDS  |
| S88                  | 4951994           | ns                | rec    | UTI89_C5081 | hold      | CDS  |
| S88                  | 4951996           | ns                | rec    | UTI89_C5081 | hold      | CDS  |
| S88                  | 4952006           | s                 | rec    | UTI89_C5081 | hold      | CDS  |
| S88                  | 4952075           | ns                | rec    | UTI89_C5081 | hold      | CDS  |
| S88                  | 4952166           | s                 | rec    | UTI89_C5082 | rimI      | CDS  |
| S88                  | 4952220           | s                 | rec    | UTI89_C5082 | rimI      | CDS  |
| UTI89                | 4986069           | s                 |        | UTI89_C5082 | rimI      | CDS  |
| S88                  | 4952424           | s                 | rec    | UTI89_C5082 | rimI      | CDS  |
| S88                  | 4952445           | s                 | rec    | UTI89_C5082 | rimI      | CDS  |
| S88                  | 4952451           | s                 | rec    | UTI89_C5082 | rimI      | CDS  |
| S88                  | 4952559           | s                 | rec    | UTI89_C5082 | rimI      | CDS  |
| S88                  | 4952575           | nc                | rec    | intergenic  |           |      |
| S88                  | 4952822           | s                 | rec    | UTI89_C5083 | yjjG      | CDS  |
| S88                  | 4952825           | s                 | rec    | UTI89_C5083 | yjjG      | CDS  |
| S88                  | 4952840           | s                 | rec    | UTI89_C5083 | yjjG      | CDS  |
| S88                  | 4952870           | s                 | rec    | UTI89_C5083 | yjjG      | CDS  |
| S88                  | 4952877           | s                 | rec    | UTI89_C5083 | yjjG      | CDS  |
| S88                  | 4952885           | s                 | rec    | UTI89_C5083 | yjjG      | CDS  |
| S88                  | 4952894           | s                 | rec    | UTI89_C5083 | yjjG      | CDS  |
| S88                  | 4952951           | s                 | rec    | UTI89_C5083 | yjjG      | CDS  |
| S88                  | 4952966           | s                 | rec    | UTI89_C5083 | yjjG      | CDS  |
| S88                  | 4953074           | s                 | rec    | UTI89_C5083 | yjjG      | CDS  |
| S88                  | 4953113           | s                 | rec    | UTI89_C5083 | yjjG      | CDS  |

| lineage <sup>a</sup> | site <sup>b</sup> | mutation          |        | gene        | Gene name | Type |
|----------------------|-------------------|-------------------|--------|-------------|-----------|------|
|                      |                   | type <sup>c</sup> | recomb |             |           |      |
| S88                  | 4953179           | s                 | rec    | UTI89_C5083 | yjjG      | CDS  |
| S88                  | 4953183           | ns                | rec    | UTI89_C5083 | yjjG      | CDS  |
| UTI89/AS             | 4988688           | nc                |        | intergenic  |           |      |
| UTI89/AS             | 4988713           | nc                |        | intergenic  |           |      |
| APEC                 | 4989741           | ns                |        | UTI89_C5086 | -         | CDS  |
| UTI89/AS             | 4989979           | s                 |        | UTI89_C5086 | -         | CDS  |
| AS                   | 4990632           | ns                |        | UTI89_C5087 | -         | CDS  |
| UTI89/AS             | 4991962           | s                 | rec    | UTI89_C5089 | -         | CDS  |
| UTI89/AS             | 4991968           | s                 | rec    | UTI89_C5089 | -         | CDS  |
| UTI89/AS             | 4991977           | s                 | rec    | UTI89_C5089 | -         | CDS  |
| UTI89/AS             | 4992003           | ns                | rec    | UTI89_C5089 | -         | CDS  |
| UTI89/AS             | 4992012           | s                 | rec    | UTI89_C5089 | -         | CDS  |
| UTI89/AS             | 4992013           | s                 | rec    | UTI89_C5089 | -         | CDS  |
| UTI89/AS             | 4992018           | ns                | rec    | UTI89_C5089 | -         | CDS  |
| UTI89/AS             | 4992025           | s                 | rec    | UTI89_C5089 | -         | CDS  |
| UTI89/AS             | 4992034           | s                 | rec    | UTI89_C5089 | -         | CDS  |
| UTI89                | 4992238           | ns                |        | UTI89_C5090 | -         | CDS  |
| AS                   | 4996702           | s                 |        | UTI89_C5098 | -         | CDS  |
| UTI89/AS             | 4997992           | ns                | rec    | UTI89_C5099 | -         | CDS  |
| UTI89/AS             | 4998218           | ns                | rec    | UTI89_C5100 | -         | CDS  |
| UTI89/AS             | 4998384           | ns                | rec    | UTI89_C5100 | -         | CDS  |
| UTI89/AS             | 4998539           | s                 | rec    | UTI89_C5100 | -         | CDS  |
| UTI89/AS             | 4998542           | s                 | rec    | UTI89_C5100 | -         | CDS  |
| UTI89/AS             | 4998617           | ns                | rec    | UTI89_C5100 | -         | CDS  |
| UTI89/AS             | 4998758           | s                 | rec    | UTI89_C5100 | -         | CDS  |
| UTI89/AS             | 4998847           | s                 | rec    | UTI89_C5101 | yfdN2     | CDS  |
| UTI89/AS             | 4998850           | s                 | rec    | UTI89_C5101 | yfdN2     | CDS  |
| UTI89/AS             | 4998907           | s                 | rec    | UTI89_C5101 | yfdN2     | CDS  |
| UTI89/AS             | 4998919           | s                 | rec    | UTI89_C5101 | yfdN2     | CDS  |
| UTI89/AS             | 4998931           | s                 | rec    | UTI89_C5101 | yfdN2     | CDS  |
| UTI89/AS             | 4999067           | ns                | rec    | UTI89_C5101 | yfdN2     | CDS  |
| UTI89/AS             | 4999069           | ns                | rec    | UTI89_C5101 | yfdN2     | CDS  |
| UTI89/AS             | 4999117           | s                 | rec    | UTI89_C5101 | yfdN2     | CDS  |
| UTI89/AS             | 4999126           | s                 | rec    | UTI89_C5101 | yfdN2     | CDS  |
| UTI89/AS             | 4999146           | ns                | rec    | UTI89_C5101 | yfdN2     | CDS  |
| UTI89/AS             | 4999176           | ns                | rec    | UTI89_C5101 | yfdN2     | CDS  |
| UTI89/AS             | 4999183           | s                 | rec    | UTI89_C5101 | yfdN2     | CDS  |
| UTI89/AS             | 4999192           | s                 | rec    | UTI89_C5101 | yfdN2     | CDS  |
| UTI89/AS             | 4999203           | ns                | rec    | UTI89_C5101 | yfdN2     | CDS  |
| UTI89/AS             | 4999229           | ns                | rec    | UTI89_C5101 | yfdN2     | CDS  |
| UTI89/AS             | 4999254           | ns                | rec    | UTI89_C5101 | yfdN2     | CDS  |
| UTI89/AS             | 4999255           | ns                | rec    | UTI89_C5101 | yfdN2     | CDS  |
| UTI89/AS             | 4999293           | ns                | rec    | UTI89_C5101 | yfdN2     | CDS  |
| UTI89/AS             | 4999303           | ns                | rec    | UTI89_C5101 | yfdN2     | CDS  |
| UTI89/AS             | 4999331           | ns                | rec    | UTI89_C5101 | yfdN2     | CDS  |

| lineage <sup>a</sup> | site <sup>b</sup> | mutation          |        | gene        | Gene name | Type |
|----------------------|-------------------|-------------------|--------|-------------|-----------|------|
|                      |                   | type <sup>c</sup> | recomb |             |           |      |
| UTI89/AS             | 4999997           | s                 | rec    | UTI89_C5103 | -         | CDS  |
| UTI89/AS             | 5000042           | s                 | rec    | UTI89_C5103 | -         | CDS  |
| UTI89/AS             | 5000057           | s                 | rec    | UTI89_C5103 | -         | CDS  |
| UTI89/AS             | 5000085           | ns                | rec    | UTI89_C5103 | -         | CDS  |
| UTI89/AS             | 5000105           | s                 | rec    | UTI89_C5103 | -         | CDS  |
| UTI89/AS             | 5000183           | s                 | rec    | UTI89_C5103 | -         | CDS  |
| UTI89/AS             | 5000186           | s                 | rec    | UTI89_C5103 | -         | CDS  |
| UTI89/AS             | 5000199           | ns                | rec    | UTI89_C5103 | -         | CDS  |
| UTI89/AS             | 5000201           | ns                | rec    | UTI89_C5103 | -         | CDS  |
| UTI89/AS             | 5000225           | s                 | rec    | UTI89_C5103 | -         | CDS  |
| UTI89/AS             | 5000227           | ns                | rec    | UTI89_C5103 | -         | CDS  |
| UTI89/AS             | 5000240           | s                 | rec    | UTI89_C5103 | -         | CDS  |
| UTI89/AS             | 5000241           | ns                | rec    | UTI89_C5103 | -         | CDS  |
| UTI89/AS             | 5000267           | s                 | rec    | UTI89_C5103 | -         | CDS  |
| UTI89/AS             | 5000270           | s                 | rec    | UTI89_C5103 | -         | CDS  |
| UTI89/AS             | 5000280           | ns                | rec    | UTI89_C5103 | -         | CDS  |
| UTI89/AS             | 5000300           | s                 | rec    | UTI89_C5103 | -         | CDS  |
| UTI89/AS             | 5000332           | s                 | rec    | UTI89_C5104 | -         | CDS  |
| UTI89/AS             | 5000383           | s                 | rec    | UTI89_C5104 | -         | CDS  |
| UTI89/AS             | 5000413           | s                 | rec    | UTI89_C5104 | -         | CDS  |
| UTI89/AS             | 5000444           | ns                | rec    | UTI89_C5104 | -         | CDS  |
| UTI89/AS             | 5000590           | s                 | rec    | UTI89_C5104 | -         | CDS  |
| UTI89/AS             | 5000620           | s                 | rec    | UTI89_C5104 | -         | CDS  |
| UTI89/AS             | 5000642           | ns                | rec    | UTI89_C5104 | -         | CDS  |
| UTI89/AS             | 5000674           | s                 | rec    | UTI89_C5104 | -         | CDS  |
| UTI89/AS             | 5000681           | ns                | rec    | UTI89_C5104 | -         | CDS  |
| UTI89/AS             | 5000738           | s                 | rec    | UTI89_C5105 | -         | CDS  |
| UTI89/AS             | 5000774           | s                 | rec    | UTI89_C5105 | -         | CDS  |
| UTI89/AS             | 5000795           | s                 | rec    | UTI89_C5105 | -         | CDS  |
| UTI89/AS             | 5000807           | s                 | rec    | UTI89_C5105 | -         | CDS  |
| UTI89/AS             | 5000831           | s                 | rec    | UTI89_C5105 | -         | CDS  |
| UTI89/AS             | 5000861           | s                 | rec    | UTI89_C5105 | -         | CDS  |
| UTI89/AS             | 5000863           | ns                | rec    | UTI89_C5105 | -         | CDS  |
| UTI89/AS             | 5000987           | s                 | rec    | UTI89_C5105 | -         | CDS  |
| UTI89/AS             | 5001005           | s                 | rec    | UTI89_C5105 | -         | CDS  |
| UTI89/AS             | 5001026           | s                 | rec    | UTI89_C5105 | -         | CDS  |
| UTI89/AS             | 5001040           | ns                | rec    | UTI89_C5105 | -         | CDS  |
| UTI89/AS             | 5001059           | s                 | rec    | UTI89_C5105 | -         | CDS  |
| UTI89/AS             | 5001122           | s                 | rec    | UTI89_C5105 | -         | CDS  |
| UTI89/AS             | 5001152           | s                 | rec    | UTI89_C5105 | -         | CDS  |
| UTI89/AS             | 5001221           | s                 | rec    | UTI89_C5105 | -         | CDS  |
| UTI89/AS             | 5001224           | s                 | rec    | UTI89_C5105 | -         | CDS  |
| UTI89/AS             | 5001226           | ns                | rec    | UTI89_C5105 | -         | CDS  |
| UTI89/AS             | 5001227           | ns                | rec    | UTI89_C5105 | -         | CDS  |
| UTI89/AS             | 5001239           | s                 | rec    | UTI89_C5105 | -         | CDS  |

| lineage <sup>a</sup> | site <sup>b</sup> | mutation          |        | gene        | Gene name | Type |
|----------------------|-------------------|-------------------|--------|-------------|-----------|------|
|                      |                   | type <sup>c</sup> | recomb |             |           |      |
| UTI89/AS             | 5001254           | s                 | rec    | UTI89_C5105 | -         | CDS  |
| UTI89/AS             | 5001271           | ns                | rec    | UTI89_C5105 | -         | CDS  |
| S88                  | 4965987           | s                 |        | UTI89_C5105 | -         | CDS  |
| UTI89/AS             | 5001293           | s                 | rec    | UTI89_C5105 | -         | CDS  |
| UTI89/AS             | 5001319           | ns                | rec    | UTI89_C5105 | -         | CDS  |
| UTI89/AS             | 5001344           | s                 | rec    | UTI89_C5105 | -         | CDS  |
| UTI89/AS             | 5001364           | ns                | rec    | UTI89_C5105 | -         | CDS  |
| UTI89/AS             | 5001371           | s                 | rec    | UTI89_C5105 | -         | CDS  |
| UTI89/AS             | 5001437           | s                 | rec    | UTI89_C5105 | -         | CDS  |
| UTI89/AS             | 5001461           | s                 | rec    | UTI89_C5105 | -         | CDS  |
| UTI89/AS             | 5001464           | s                 | rec    | UTI89_C5105 | -         | CDS  |
| UTI89/AS             | 5001570           | s                 | rec    | intergenic  |           |      |
| UTI89/AS             | 5001582           | s                 | rec    | intergenic  |           |      |
| UTI89/AS             | 5001585           | s                 | rec    | intergenic  |           |      |
| UTI89/AS             | 5001741           | s                 | rec    | intergenic  |           |      |
| UTI89/AS             | 5001744           | s                 | rec    | intergenic  |           |      |
| UTI89/AS             | 5001753           | s                 | rec    | intergenic  |           |      |
| UTI89/AS             | 5001849           | s                 | rec    | intergenic  |           |      |
| UTI89/AS             | 5001861           | s                 | rec    | intergenic  |           |      |
| UTI89/AS             | 5001867           | s                 | rec    | intergenic  |           |      |
| UTI89/AS             | 5001900           | s                 | rec    | intergenic  |           |      |
| UTI89/AS             | 5001903           | s                 | rec    | intergenic  |           |      |
| UTI89/AS             | 5001966           | s                 | rec    | intergenic  |           |      |
| UTI89/AS             | 5002033           | ns                | rec    | intergenic  |           |      |
| UTI89/AS             | 5002044           | s                 | rec    | intergenic  |           |      |
| UTI89/AS             | 5002045           | s                 | rec    | intergenic  |           |      |
| UTI89/AS             | 5002095           | s                 | rec    | intergenic  |           |      |
| UTI89/AS             | 5002110           | s                 | rec    | intergenic  |           |      |
| UTI89/AS             | 5002223           | ns                | rec    | intergenic  |           |      |
| UTI89/AS             | 5002236           | s                 | rec    | intergenic  |           |      |
| UTI89/AS             | 5002284           | s                 | rec    | intergenic  |           |      |
| UTI89/AS             | 5002293           | s                 | rec    | intergenic  |           |      |
| UTI89/AS             | 5002311           | s                 | rec    | intergenic  |           |      |
| UTI89/AS             | 5002338           | s                 | rec    | intergenic  |           |      |
| UTI89/AS             | 5002359           | s                 | rec    | intergenic  |           |      |
| UTI89/AS             | 5002374           | s                 | rec    | intergenic  |           |      |
| UTI89/AS             | 5002377           | s                 | rec    | intergenic  |           |      |
| UTI89/AS             | 5002432           | ns                | rec    | intergenic  |           |      |
| UTI89/AS             | 5002458           | s                 | rec    | intergenic  |           |      |
| UTI89/AS             | 5002506           | s                 | rec    | intergenic  |           |      |
| UTI89/AS             | 5006849           | s                 | rec    | UTI89_C5115 | -         | CDS  |
| UTI89/AS             | 5006854           | ns                | rec    | UTI89_C5115 | -         | CDS  |
| UTI89/AS             | 5006855           | ns                | rec    | UTI89_C5115 | -         | CDS  |
| UTI89/AS             | 5006859           | ns                | rec    | UTI89_C5115 | -         | CDS  |
| UTI89/AS             | 5006860           | ns                | rec    | UTI89_C5115 | -         | CDS  |



| lineage <sup>a</sup> | site <sup>b</sup> | mutation          |        | gene        | Gene name | Type |
|----------------------|-------------------|-------------------|--------|-------------|-----------|------|
|                      |                   | type <sup>c</sup> | recomb |             |           |      |
| UTI89/AS             | 5006869           | ns                | rec    | UTI89_C5115 | -         | CDS  |
| UTI89/AS             | 5006871           | ns                | rec    | UTI89_C5115 | -         | CDS  |
| UTI89/AS             | 5006874           | ns                | rec    | UTI89_C5115 | -         | CDS  |
| UTI89/AS             | 5006875           | ns                | rec    | UTI89_C5115 | -         | CDS  |
| UTI89/AS             | 5006879           | s                 | rec    | UTI89_C5115 | -         | CDS  |
| UTI89/AS             | 5006881           | ns                | rec    | UTI89_C5115 | -         | CDS  |
| UTI89/AS             | 5006887           | ns                | rec    | UTI89_C5115 | -         | CDS  |
| UTI89/AS             | 5006896           | ns                | rec    | UTI89_C5115 | -         | CDS  |
| UTI89/AS             | 5006909           | s                 | rec    | UTI89_C5115 | -         | CDS  |
| UTI89/AS             | 5006912           | ns                | rec    | UTI89_C5115 | -         | CDS  |
| UTI89/AS             | 5006915           | s                 | rec    | UTI89_C5115 | -         | CDS  |
| UTI89/AS             | 5006916           | s                 | rec    | UTI89_C5115 | -         | CDS  |
| UTI89/AS             | 5006920           | ns                | rec    | UTI89_C5115 | -         | CDS  |
| UTI89/AS             | 5006926           | ns                | rec    | UTI89_C5115 | -         | CDS  |
| UTI89/AS             | 5006928           | ns                | rec    | UTI89_C5115 | -         | CDS  |
| UTI89/AS             | 5006935           | ns                | rec    | UTI89_C5115 | -         | CDS  |
| UTI89/AS             | 5006936           | ns                | rec    | UTI89_C5115 | -         | CDS  |
| UTI89/AS             | 5006938           | ns                | rec    | UTI89_C5115 | -         | CDS  |
| UTI89/AS             | 5006949           | ns                | rec    | UTI89_C5115 | -         | CDS  |
| UTI89/AS             | 5006961           | ns                | rec    | UTI89_C5115 | -         | CDS  |
| UTI89/AS             | 5006968           | ns                | rec    | UTI89_C5115 | -         | CDS  |
| UTI89/AS             | 5006969           | ns                | rec    | UTI89_C5115 | -         | CDS  |
| UTI89/AS             | 5006970           | ns                | rec    | UTI89_C5115 | -         | CDS  |
| UTI89/AS             | 5007084           | ns                | rec    | UTI89_C5115 | -         | CDS  |
| UTI89/AS             | 5007186           | ns                | rec    | UTI89_C5116 | -         | CDS  |
| UTI89/AS             | 5007534           | s                 | rec    | UTI89_C5116 | -         | CDS  |
| UTI89/AS             | 5007537           | s                 | rec    | UTI89_C5116 | -         | CDS  |
| UTI89/AS             | 5007776           | s                 | rec    | UTI89_C5117 | -         | CDS  |
| UTI89/AS             | 5007887           | s                 | rec    | UTI89_C5117 | -         | CDS  |
| UTI89/AS             | 5007947           | s                 | rec    | UTI89_C5117 | -         | CDS  |
| UTI89/AS             | 5008007           | s                 | rec    | UTI89_C5117 | -         | CDS  |
| UTI89/AS             | 5008544           | s                 | rec    | UTI89_C5117 | -         | CDS  |
| UTI89/AS             | 5008704           | ns                | rec    | UTI89_C5117 | -         | CDS  |
| UTI89/AS             | 5008883           | s                 | rec    | UTI89_C5117 | -         | CDS  |
| UTI89/AS             | 5008895           | s                 | rec    | UTI89_C5117 | -         | CDS  |
| UTI89/AS             | 5009168           | s                 | rec    | UTI89_C5117 | -         | CDS  |
| UTI89/AS             | 5009306           | s                 | rec    | UTI89_C5117 | -         | CDS  |
| UTI89/AS             | 5009336           | s                 | rec    | UTI89_C5117 | -         | CDS  |
| UTI89/AS             | 5009402           | s                 | rec    | UTI89_C5117 | -         | CDS  |
| UTI89/AS             | 5009480           | s                 | rec    | UTI89_C5117 | -         | CDS  |
| UTI89/AS             | 5009602           | ns                | rec    | UTI89_C5117 | -         | CDS  |
| APEC                 | 5009646           | ns                |        | UTI89_C5117 | -         | CDS  |
| UTI89/AS             | 5009661           | ns                | rec    | UTI89_C5117 | -         | CDS  |
| UTI89/AS             | 5009956           | ns                | rec    | UTI89_C5118 | -         | CDS  |
| UTI89/AS             | 5010183           | s                 | rec    | UTI89_C5119 | -         | CDS  |

| lineage <sup>a</sup> | site <sup>b</sup> | mutation          |        | gene        | Gene name | Type |
|----------------------|-------------------|-------------------|--------|-------------|-----------|------|
|                      |                   | type <sup>c</sup> | recomb |             |           |      |
| UTI89/AS             | 5010291           | s                 | rec    | UTI89_C5119 | -         | CDS  |
| UTI89/AS             | 5010376           | s                 | rec    | UTI89_C5119 | -         | CDS  |
| UTI89/AS             | 5010600           | s                 | rec    | UTI89_C5119 | -         | CDS  |
| UTI89/AS             | 5010837           | ns                | rec    | UTI89_C5119 | -         | CDS  |
| UTI89/AS             | 5010840           | ns                | rec    | UTI89_C5119 | -         | CDS  |
| UTI89/AS             | 5010924           | s                 | rec    | UTI89_C5119 | -         | CDS  |
| UTI89/AS             | 5010936           | s                 | rec    | UTI89_C5119 | -         | CDS  |
| UTI89/AS             | 5011005           | s                 | rec    | UTI89_C5119 | -         | CDS  |
| UTI89/AS             | 5011008           | s                 | rec    | UTI89_C5119 | -         | CDS  |
| UTI89/AS             | 5011179           | s                 | rec    | UTI89_C5119 | -         | CDS  |
| UTI89/AS             | 5011275           | s                 | rec    | UTI89_C5119 | -         | CDS  |
| UTI89/AS             | 5011323           | s                 | rec    | UTI89_C5119 | -         | CDS  |
| UTI89/AS             | 5011350           | ns                | rec    | UTI89_C5120 | -         | CDS  |
| UTI89/AS             | 5011498           | s                 | rec    | UTI89_C5120 | -         | CDS  |
| UTI89/AS             | 5011558           | s                 | rec    | UTI89_C5120 | -         | CDS  |
| UTI89/AS             | 5011621           | s                 | rec    | UTI89_C5120 | -         | CDS  |
| UTI89/AS             | 5011669           | s                 | rec    | UTI89_C5120 | -         | CDS  |
| UTI89/AS             | 5011775           | ns                | rec    | UTI89_C5120 | -         | CDS  |
| UTI89/AS             | 5011858           | s                 | rec    | UTI89_C5120 | -         | CDS  |
| UTI89/AS             | 5011972           | ns                | rec    | UTI89_C5120 | -         | CDS  |
| UTI89/AS             | 5011993           | s                 | rec    | UTI89_C5120 | -         | CDS  |
| UTI89/AS             | 5012071           | s                 | rec    | UTI89_C5120 | -         | CDS  |
| UTI89/AS             | 5012118           | ns                | rec    | UTI89_C5120 | -         | CDS  |
| UTI89/AS             | 5012176           | s                 | rec    | UTI89_C5120 | -         | CDS  |
| UTI89/AS             | 5012191           | s                 | rec    | UTI89_C5120 | -         | CDS  |
| UTI89/AS             | 5012261           | ns                | rec    | UTI89_C5120 | -         | CDS  |
| UTI89/AS             | 5012264           | s                 | rec    | UTI89_C5120 | -         | CDS  |
| UTI89/AS             | 5012266           | s                 | rec    | UTI89_C5120 | -         | CDS  |
| UTI89/AS             | 5012437           | s                 | rec    | UTI89_C5120 | -         | CDS  |
| UTI89/AS             | 5012443           | s                 | rec    | UTI89_C5120 | -         | CDS  |
| UTI89/AS             | 5012455           | s                 | rec    | UTI89_C5120 | -         | CDS  |
| UTI89/AS             | 5012521           | s                 | rec    | UTI89_C5120 | -         | CDS  |
| UTI89/AS             | 5012530           | s                 | rec    | UTI89_C5120 | -         | CDS  |
| UTI89/AS             | 5012650           | s                 | rec    | UTI89_C5120 | -         | CDS  |
| UTI89/AS             | 5012761           | s                 | rec    | UTI89_C5120 | -         | CDS  |
| UTI89/AS             | 5012893           | s                 | rec    | UTI89_C5120 | -         | CDS  |
| UTI89/AS             | 5013022           | s                 | rec    | UTI89_C5120 | -         | CDS  |
| UTI89/AS             | 5013082           | s                 | rec    | UTI89_C5120 | -         | CDS  |
| UTI89/AS             | 5013286           | s                 | rec    | UTI89_C5120 | -         | CDS  |
| UTI89/AS             | 5013301           | s                 | rec    | UTI89_C5120 | -         | CDS  |
| UTI89/AS             | 5013400           | s                 | rec    | UTI89_C5120 | -         | CDS  |
| UTI89/AS             | 5013406           | s                 | rec    | UTI89_C5120 | -         | CDS  |
| UTI89/AS             | 5013427           | s                 | rec    | UTI89_C5120 | -         | CDS  |
| UTI89/AS             | 5013621           | s                 | rec    | UTI89_C5121 | -         | CDS  |
| UTI89/AS             | 5013660           | s                 | rec    | UTI89_C5121 | -         | CDS  |

| lineage <sup>a</sup> | site <sup>b</sup> | mutation          |        | gene        | Gene name | Type |
|----------------------|-------------------|-------------------|--------|-------------|-----------|------|
|                      |                   | type <sup>c</sup> | recomb |             |           |      |
| UTI89/AS             | 5013678           | ns                | rec    | UTI89_C5121 | -         | CDS  |
| UTI89/AS             | 5013753           | s                 | rec    | UTI89_C5121 | -         | CDS  |
| UTI89/AS             | 5013786           | ns                | rec    | UTI89_C5121 | -         | CDS  |
| UTI89/AS             | 5014093           | s                 | rec    | UTI89_C5122 | -         | CDS  |
| UTI89/AS             | 5014370           | ns                | rec    | intergenic  |           |      |
| UTI89/AS             | 5014652           | s                 | rec    | UTI89_C5123 | -         | CDS  |
| UTI89/AS             | 5014695           | ns                | rec    | UTI89_C5123 | -         | CDS  |
| UTI89/AS             | 5014722           | ns                | rec    | UTI89_C5123 | -         | CDS  |
| UTI89/AS             | 5015211           | s                 | rec    | UTI89_C5125 | -         | CDS  |
| UTI89/AS             | 5015214           | s                 | rec    | UTI89_C5125 | -         | CDS  |
| UTI89/AS             | 5015307           | s                 | rec    | UTI89_C5125 | -         | CDS  |
| UTI89/AS             | 5015481           | s                 | rec    | UTI89_C5125 | -         | CDS  |
| UTI89/AS             | 5015511           | s                 | rec    | UTI89_C5125 | -         | CDS  |
| UTI89/AS             | 5015609           | ns                | rec    | UTI89_C5125 | -         | CDS  |
| UTI89/AS             | 5015610           | ns                | rec    | UTI89_C5125 | -         | CDS  |
| UTI89/AS             | 5015631           | s                 | rec    | UTI89_C5125 | -         | CDS  |
| UTI89/AS             | 5015634           | s                 | rec    | UTI89_C5125 | -         | CDS  |
| UTI89/AS             | 5015635           | ns                | rec    | UTI89_C5125 | -         | CDS  |
| UTI89/AS             | 5015643           | s                 | rec    | UTI89_C5125 | -         | CDS  |
| UTI89/AS             | 5015757           | s                 | rec    | UTI89_C5125 | -         | CDS  |
| UTI89/AS             | 5015769           | s                 | rec    | UTI89_C5125 | -         | CDS  |
| UTI89/AS             | 5015775           | s                 | rec    | UTI89_C5125 | -         | CDS  |
| UTI89/AS             | 5015784           | s                 | rec    | UTI89_C5125 | -         | CDS  |
| UTI89/AS             | 5015851           | ns                | rec    | UTI89_C5125 | -         | CDS  |
| UTI89/AS             | 5015852           | ns                | rec    | UTI89_C5125 | -         | CDS  |
| UTI89/AS             | 5015871           | s                 | rec    | UTI89_C5125 | -         | CDS  |
| UTI89/AS             | 5015912           | nc                | rec    | intergenic  |           |      |
| UTI89/AS             | 5015957           | ns                | rec    | UTI89_C5126 | -         | CDS  |
| UTI89/AS             | 5016028           | ns                | rec    | UTI89_C5126 | -         | CDS  |
| UTI89/AS             | 5016066           | s                 | rec    | UTI89_C5126 | -         | CDS  |
| UTI89/AS             | 5016287           | ns                | rec    | UTI89_C5126 | -         | CDS  |
| UTI89/AS             | 5016431           | s                 | rec    | UTI89_C5127 | -         | CDS  |
| UTI89/AS             | 5016702           | s                 | rec    | intergenic  |           |      |
| UTI89/AS             | 5016816           | s                 | rec    | intergenic  |           |      |
| UTI89/AS             | 5016819           | s                 | rec    | intergenic  |           |      |
| UTI89/AS             | 5016930           | s                 | rec    | intergenic  |           |      |
| UTI89/AS             | 5017047           | s                 | rec    | intergenic  |           |      |
| UTI89/AS             | 5017146           | s                 | rec    | intergenic  |           |      |
| UTI89/AS             | 5017238           | ns                | rec    | intergenic  |           |      |
| UTI89/AS             | 5017275           | s                 | rec    | intergenic  |           |      |
| UTI89/AS             | 5017371           | s                 | rec    | intergenic  |           |      |
| UTI89/AS             | 5017506           | s                 | rec    | intergenic  |           |      |
| UTI89/AS             | 5017533           | s                 | rec    | intergenic  |           |      |
| UTI89/AS             | 5017536           | s                 | rec    | intergenic  |           |      |
| UTI89/AS             | 5017600           | s                 | rec    | intergenic  |           |      |

| lineage <sup>a</sup> | site <sup>b</sup> | mutation          |        | gene        | Gene name | Type |
|----------------------|-------------------|-------------------|--------|-------------|-----------|------|
|                      |                   | type <sup>c</sup> | recomb |             |           |      |
| UTI89/AS             | 5017766           | ns                | rec    | intergenic  |           |      |
| UTI89/AS             | 5017817           | ns                | rec    | intergenic  |           |      |
| UTI89/AS             | 5017888           | ns                | rec    | intergenic  |           |      |
| UTI89/AS             | 5017926           | s                 | rec    | intergenic  |           |      |
| UTI89/AS             | 5017947           | s                 | rec    | intergenic  |           |      |
| UTI89/AS             | 5018025           | s                 | rec    | intergenic  |           |      |
| UTI89/AS             | 5018055           | s                 | rec    | intergenic  |           |      |
| UTI89/AS             | 5018119           | ns                | rec    | intergenic  |           |      |
| UTI89/AS             | 5018187           | s                 | rec    | intergenic  |           |      |
| UTI89/AS             | 5018211           | ns                | rec    | intergenic  |           |      |
| UTI89/AS             | 5018220           | s                 | rec    | intergenic  |           |      |
| UTI89/AS             | 5018395           | ns                | rec    | intergenic  |           |      |
| UTI89/AS             | 5018660           | ns                | rec    | intergenic  |           |      |
| UTI89/AS             | 5018814           | s                 | rec    | intergenic  |           |      |
| UTI89/AS             | 5018826           | s                 | rec    | intergenic  |           |      |
| UTI89/AS             | 5018833           | ns                | rec    | intergenic  |           |      |
| UTI89/AS             | 5018835           | ns                | rec    | intergenic  |           |      |
| UTI89/AS             | 5018874           | s                 | rec    | intergenic  |           |      |
| UTI89/AS             | 5018904           | s                 | rec    | intergenic  |           |      |
| UTI89/AS             | 5019058           | ns                | rec    | intergenic  |           |      |
| UTI89/AS             | 5019062           | ns                | rec    | intergenic  |           |      |
| UTI89/AS             | 5019063           | ns                | rec    | intergenic  |           |      |
| UTI89/AS             | 5019357           | ns                | rec    | UTI89_C5128 | -         | CDS  |
| UTI89/AS             | 5019372           | s                 | rec    | UTI89_C5128 | -         | CDS  |
| UTI89/AS             | 5019466           | ns                | rec    | UTI89_C5128 | -         | CDS  |
| UTI89/AS             | 5019513           | ns                | rec    | UTI89_C5128 | -         | CDS  |
| UTI89/AS             | 5019516           | ns                | rec    | UTI89_C5128 | -         | CDS  |
| UTI89/AS             | 5019535           | ns                | rec    | UTI89_C5128 | -         | CDS  |
| UTI89/AS             | 5019552           | ns                | rec    | UTI89_C5128 | -         | CDS  |
| UTI89/AS             | 5019605           | s                 | rec    | UTI89_C5128 | -         | CDS  |
| UTI89/AS             | 5019618           | ns                | rec    | UTI89_C5128 | -         | CDS  |
| UTI89/AS             | 5019854           | ns                | rec    | UTI89_C5129 | -         | CDS  |
| UTI89/AS             | 5019899           | s                 | rec    | UTI89_C5129 | -         | CDS  |
| UTI89/AS             | 5019938           | s                 | rec    | UTI89_C5129 | -         | CDS  |
| UTI89/AS             | 5020180           | ns                | rec    | UTI89_C5130 | -         | CDS  |
| UTI89/AS             | 5020204           | ns                | rec    | UTI89_C5130 | -         | CDS  |
| UTI89/AS             | 5020223           | s                 | rec    | UTI89_C5130 | -         | CDS  |
| UTI89/AS             | 5020284           | ns                | rec    | UTI89_C5130 | -         | CDS  |
| UTI89/AS             | 5020289           | s                 | rec    | UTI89_C5130 | -         | CDS  |
| UTI89/AS             | 5020298           | s                 | rec    | UTI89_C5130 | -         | CDS  |
| UTI89/AS             | 5020313           | s                 | rec    | UTI89_C5130 | -         | CDS  |
| UTI89/AS             | 5020344           | s                 | rec    | UTI89_C5130 | -         | CDS  |
| UTI89/AS             | 5020400           | s                 | rec    | UTI89_C5130 | -         | CDS  |
| UTI89/AS             | 5020442           | s                 | rec    | UTI89_C5130 | -         | CDS  |
| UTI89/AS             | 5020463           | s                 | rec    | UTI89_C5130 | -         | CDS  |

| lineage <sup>a</sup> | site <sup>b</sup> | mutation          |        | gene        | Gene name | Type |
|----------------------|-------------------|-------------------|--------|-------------|-----------|------|
|                      |                   | type <sup>c</sup> | recomb |             |           |      |
| UTI89/AS             | 5020469           | s                 | rec    | UTI89_C5130 | -         | CDS  |
| UTI89/AS             | 5020478           | s                 | rec    | UTI89_C5130 | -         | CDS  |
| UTI89/AS             | 5020484           | s                 | rec    | UTI89_C5130 | -         | CDS  |
| UTI89/AS             | 5020485           | s                 | rec    | UTI89_C5130 | -         | CDS  |
| UTI89/AS             | 5020493           | s                 | rec    | UTI89_C5130 | -         | CDS  |
| UTI89/AS             | 5020508           | s                 | rec    | UTI89_C5130 | -         | CDS  |
| UTI89/AS             | 5020511           | s                 | rec    | UTI89_C5130 | -         | CDS  |
| UTI89/AS             | 5020526           | s                 | rec    | UTI89_C5130 | -         | CDS  |
| UTI89/AS             | 5020577           | s                 | rec    | UTI89_C5130 | -         | CDS  |
| UTI89/AS             | 5020595           | s                 | rec    | UTI89_C5130 | -         | CDS  |
| UTI89/AS             | 5020622           | s                 | rec    | UTI89_C5130 | -         | CDS  |
| UTI89/AS             | 5020623           | ns                | rec    | UTI89_C5130 | -         | CDS  |
| UTI89/AS             | 5020664           | s                 | rec    | UTI89_C5130 | -         | CDS  |
| UTI89/AS             | 5020731           | ns                | rec    | UTI89_C5131 | -         | CDS  |
| UTI89/AS             | 5020813           | ns                | rec    | UTI89_C5131 | -         | CDS  |
| UTI89/AS             | 5020868           | ns                | rec    | UTI89_C5131 | -         | CDS  |
| UTI89/AS             | 5020869           | ns                | rec    | UTI89_C5131 | -         | CDS  |
| UTI89/AS             | 5020929           | s                 | rec    | UTI89_C5131 | -         | CDS  |
| UTI89/AS             | 5020935           | s                 | rec    | UTI89_C5131 | -         | CDS  |
| UTI89/AS             | 5020941           | s                 | rec    | UTI89_C5131 | -         | CDS  |
| UTI89/AS             | 5020944           | s                 | rec    | UTI89_C5131 | -         | CDS  |
| UTI89/AS             | 5020974           | s                 | rec    | UTI89_C5131 | -         | CDS  |
| UTI89/AS             | 5020984           | s                 | rec    | UTI89_C5131 | -         | CDS  |
| UTI89/AS             | 5021025           | s                 | rec    | UTI89_C5131 | -         | CDS  |
| UTI89/AS             | 5021037           | s                 | rec    | UTI89_C5131 | -         | CDS  |
| UTI89/AS             | 5021115           | s                 | rec    | UTI89_C5131 | -         | CDS  |
| UTI89/AS             | 5021121           | s                 | rec    | UTI89_C5131 | -         | CDS  |
| UTI89/AS             | 5021159           | ns                | rec    | UTI89_C5131 | -         | CDS  |
| UTI89/AS             | 5021230           | ns                | rec    | UTI89_C5131 | -         | CDS  |
| UTI89/AS             | 5021239           | ns                | rec    | UTI89_C5131 | -         | CDS  |
| UTI89/AS             | 5021241           | ns                | rec    | UTI89_C5131 | -         | CDS  |
| UTI89/AS             | 5021244           | s                 | rec    | UTI89_C5131 | -         | CDS  |
| UTI89/AS             | 5021247           | s                 | rec    | UTI89_C5131 | -         | CDS  |
| UTI89/AS             | 5021271           | s                 | rec    | UTI89_C5131 | -         | CDS  |
| UTI89/AS             | 5021319           | s                 | rec    | UTI89_C5131 | -         | CDS  |
| UTI89/AS             | 5021326           | s                 | rec    | UTI89_C5131 | -         | CDS  |
| UTI89/AS             | 5021352           | s                 | rec    | UTI89_C5131 | -         | CDS  |
| UTI89/AS             | 5021474           | ns                | rec    | UTI89_C5132 | -         | CDS  |
| UTI89/AS             | 5021487           | ns                | rec    | UTI89_C5132 | -         | CDS  |
| UTI89/AS             | 5021489           | ns                | rec    | UTI89_C5132 | -         | CDS  |
| UTI89/AS             | 5021512           | ns                | rec    | UTI89_C5132 | -         | CDS  |
| UTI89/AS             | 5021517           | ns                | rec    | UTI89_C5132 | -         | CDS  |
| UTI89/AS             | 5021519           | ns                | rec    | UTI89_C5132 | -         | CDS  |
| UTI89/AS             | 5021523           | ns                | rec    | UTI89_C5132 | -         | CDS  |
| UTI89/AS             | 5021531           | s                 | rec    | UTI89_C5132 | -         | CDS  |

| lineage <sup>a</sup> | site <sup>b</sup> | mutation          |        | gene        | Gene name | Type |
|----------------------|-------------------|-------------------|--------|-------------|-----------|------|
|                      |                   | type <sup>c</sup> | recomb |             |           |      |
| UTI89/AS             | 5021542           | ns                | rec    | UTI89_C5132 | -         | CDS  |
| UTI89/AS             | 5021543           | ns                | rec    | UTI89_C5132 | -         | CDS  |
| UTI89/AS             | 5021546           | ns                | rec    | UTI89_C5132 | -         | CDS  |
| UTI89/AS             | 5021555           | s                 | rec    | UTI89_C5132 | -         | CDS  |
| UTI89/AS             | 5021561           | s                 | rec    | UTI89_C5132 | -         | CDS  |
| UTI89/AS             | 5021585           | s                 | rec    | UTI89_C5132 | -         | CDS  |
| UTI89/AS             | 5021590           | ns                | rec    | UTI89_C5132 | -         | CDS  |
| UTI89/AS             | 5021591           | ns                | rec    | UTI89_C5132 | -         | CDS  |
| UTI89/AS             | 5021597           | s                 | rec    | UTI89_C5132 | -         | CDS  |
| UTI89/AS             | 5021645           | s                 | rec    | UTI89_C5132 | -         | CDS  |
| UTI89/AS             | 5021681           | s                 | rec    | UTI89_C5132 | -         | CDS  |
| UTI89/AS             | 5021689           | ns                | rec    | UTI89_C5132 | -         | CDS  |
| UTI89/AS             | 5021690           | ns                | rec    | UTI89_C5132 | -         | CDS  |
| UTI89/AS             | 5021699           | s                 | rec    | UTI89_C5132 | -         | CDS  |
| UTI89/AS             | 5021801           | s                 | rec    | UTI89_C5132 | -         | CDS  |
| UTI89/AS             | 5021807           | s                 | rec    | UTI89_C5132 | -         | CDS  |
| UTI89/AS             | 5021831           | s                 | rec    | UTI89_C5132 | -         | CDS  |
| UTI89/AS             | 5021834           | s                 | rec    | UTI89_C5132 | -         | CDS  |
| UTI89/AS             | 5021838           | ns                | rec    | UTI89_C5132 | -         | CDS  |
| UTI89/AS             | 5021839           | ns                | rec    | UTI89_C5132 | -         | CDS  |
| UTI89/AS             | 5021840           | ns                | rec    | UTI89_C5132 | -         | CDS  |
| UTI89/AS             | 5021841           | ns                | rec    | UTI89_C5132 | -         | CDS  |
| UTI89/AS             | 5021844           | ns                | rec    | UTI89_C5132 | -         | CDS  |
| UTI89/AS             | 5021845           | ns                | rec    | UTI89_C5132 | -         | CDS  |
| UTI89/AS             | 5021846           | ns                | rec    | UTI89_C5132 | -         | CDS  |
| UTI89/AS             | 5021848           | ns                | rec    | UTI89_C5132 | -         | CDS  |
| UTI89/AS             | 5021849           | ns                | rec    | UTI89_C5132 | -         | CDS  |
| UTI89/AS             | 5021852           | s                 | rec    | UTI89_C5132 | -         | CDS  |
| UTI89/AS             | 5021861           | s                 | rec    | UTI89_C5132 | -         | CDS  |
| UTI89/AS             | 5021864           | s                 | rec    | UTI89_C5132 | -         | CDS  |
| UTI89/AS             | 5021916           | ns                | rec    | UTI89_C5132 | -         | CDS  |
| UTI89/AS             | 5021921           | s                 | rec    | UTI89_C5132 | -         | CDS  |
| UTI89/AS             | 5021930           | s                 | rec    | UTI89_C5132 | -         | CDS  |
| UTI89/AS             | 5021951           | s                 | rec    | UTI89_C5132 | -         | CDS  |
| UTI89/AS             | 5021954           | s                 | rec    | UTI89_C5132 | -         | CDS  |
| UTI89/AS             | 5021960           | s                 | rec    | UTI89_C5132 | -         | CDS  |
| UTI89/AS             | 5021984           | s                 | rec    | UTI89_C5132 | -         | CDS  |
| UTI89/AS             | 5021993           | s                 | rec    | UTI89_C5132 | -         | CDS  |
| UTI89/AS             | 5022008           | s                 | rec    | UTI89_C5132 | -         | CDS  |
| UTI89/AS             | 5022020           | s                 | rec    | UTI89_C5132 | -         | CDS  |
| UTI89/AS             | 5022026           | nc                | rec    | intergenic  |           |      |
| UTI89/AS             | 5022031           | nc                | rec    | intergenic  |           |      |
| UTI89/AS             | 5022051           | nc                | rec    | intergenic  |           |      |
| UTI89/AS             | 5022077           | nc                | rec    | intergenic  |           |      |
| UTI89/AS             | 5022079           | nc                | rec    | intergenic  |           |      |

| lineage <sup>a</sup> | site <sup>b</sup> | mutation          |        | gene       | Gene name | Type |
|----------------------|-------------------|-------------------|--------|------------|-----------|------|
|                      |                   | type <sup>c</sup> | recomb |            |           |      |
| UTI89/AS             | 5022081           | nc                | rec    | intergenic |           |      |
| UTI89/AS             | 5022107           | s                 | rec    | intergenic |           |      |
| UTI89/AS             | 5022113           | s                 | rec    | intergenic |           |      |
| UTI89/AS             | 5022125           | s                 | rec    | intergenic |           |      |
| UTI89/AS             | 5022134           | s                 | rec    | intergenic |           |      |
| UTI89/AS             | 5022236           | s                 | rec    | intergenic |           |      |
| UTI89/AS             | 5022247           | ns                | rec    | intergenic |           |      |
| UTI89/AS             | 5022272           | s                 | rec    | intergenic |           |      |
| UTI89/AS             | 5022305           | s                 | rec    | intergenic |           |      |
| UTI89/AS             | 5022338           | s                 | rec    | intergenic |           |      |
| UTI89/AS             | 5022371           | s                 | rec    | intergenic |           |      |
| UTI89/AS             | 5022389           | s                 | rec    | intergenic |           |      |
| UTI89/AS             | 5022401           | s                 | rec    | intergenic |           |      |
| UTI89/AS             | 5022471           | s                 | rec    | intergenic |           |      |
| UTI89/AS             | 5022479           | s                 | rec    | intergenic |           |      |
| UTI89/AS             | 5022515           | s                 | rec    | intergenic |           |      |
| UTI89/AS             | 5022632           | s                 | rec    | intergenic |           |      |
| UTI89/AS             | 5022737           | s                 | rec    | intergenic |           |      |
| UTI89/AS             | 5022752           | s                 | rec    | intergenic |           |      |
| UTI89/AS             | 5022782           | s                 | rec    | intergenic |           |      |
| UTI89/AS             | 5022845           | s                 | rec    | intergenic |           |      |
| UTI89/AS             | 5022875           | ns                | rec    | intergenic |           |      |
| UTI89/AS             | 5022878           | s                 | rec    | intergenic |           |      |
| UTI89/AS             | 5022881           | s                 | rec    | intergenic |           |      |
| UTI89/AS             | 5022950           | s                 | rec    | intergenic |           |      |
| UTI89/AS             | 5022956           | s                 | rec    | intergenic |           |      |
| UTI89/AS             | 5022974           | s                 | rec    | intergenic |           |      |
| UTI89/AS             | 5023025           | s                 | rec    | intergenic |           |      |
| UTI89/AS             | 5023034           | s                 | rec    | intergenic |           |      |
| UTI89/AS             | 5023061           | s                 | rec    | intergenic |           |      |
| UTI89/AS             | 5023064           | s                 | rec    | intergenic |           |      |
| UTI89/AS             | 5023066           | ns                | rec    | intergenic |           |      |
| UTI89/AS             | 5023067           | ns                | rec    | intergenic |           |      |
| UTI89/AS             | 5023174           | ns                | rec    | intergenic |           |      |
| UTI89/AS             | 5023175           | ns                | rec    | intergenic |           |      |
| UTI89/AS             | 5023178           | s                 | rec    | intergenic |           |      |
| UTI89/AS             | 5023370           | s                 | rec    | intergenic |           |      |
| UTI89/AS             | 5023394           | s                 | rec    | intergenic |           |      |
| UTI89/AS             | 5023403           | s                 | rec    | intergenic |           |      |
| UTI89/AS             | 5023415           | s                 | rec    | intergenic |           |      |
| UTI89/AS             | 5023421           | s                 | rec    | intergenic |           |      |
| UTI89/AS             | 5023472           | s                 | rec    | intergenic |           |      |
| UTI89/AS             | 5023484           | s                 | rec    | intergenic |           |      |
| UTI89/AS             | 5023487           | s                 | rec    | intergenic |           |      |
| UTI89/AS             | 5023505           | s                 | rec    | intergenic |           |      |

| lineage <sup>a</sup> | site <sup>b</sup> | mutation          |        | gene       | Gene name | Type |
|----------------------|-------------------|-------------------|--------|------------|-----------|------|
|                      |                   | type <sup>c</sup> | recomb |            |           |      |
| UTI89/AS             | 5023511           | s                 | rec    | intergenic |           |      |
| UTI89/AS             | 5023517           | s                 | rec    | intergenic |           |      |
| UTI89/AS             | 5023529           | s                 | rec    | intergenic |           |      |
| UTI89/AS             | 5023544           | s                 | rec    | intergenic |           |      |
| UTI89/AS             | 5023559           | s                 | rec    | intergenic |           |      |
| UTI89/AS             | 5023562           | s                 | rec    | intergenic |           |      |
| UTI89/AS             | 5023634           | s                 | rec    | intergenic |           |      |
| UTI89/AS             | 5023649           | s                 | rec    | intergenic |           |      |
| UTI89/AS             | 5023661           | s                 | rec    | intergenic |           |      |
| UTI89/AS             | 5023662           | ns                | rec    | intergenic |           |      |
| UTI89/AS             | 5023663           | ns                | rec    | intergenic |           |      |
| UTI89/AS             | 5023664           | ns                | rec    | intergenic |           |      |
| UTI89/AS             | 5023667           | s                 | rec    | intergenic |           |      |
| UTI89/AS             | 5023688           | s                 | rec    | intergenic |           |      |
| UTI89/AS             | 5023715           | s                 | rec    | intergenic |           |      |
| UTI89/AS             | 5023739           | s                 | rec    | intergenic |           |      |
| UTI89/AS             | 5023757           | s                 | rec    | intergenic |           |      |
| UTI89/AS             | 5023770           | s                 | rec    | intergenic |           |      |
| UTI89/AS             | 5023779           | s                 | rec    | intergenic |           |      |
| UTI89/AS             | 5023844           | s                 | rec    | intergenic |           |      |
| UTI89/AS             | 5023859           | s                 | rec    | intergenic |           |      |
| UTI89/AS             | 5023865           | s                 | rec    | intergenic |           |      |
| UTI89/AS             | 5023940           | s                 | rec    | intergenic |           |      |
| UTI89/AS             | 5023971           | ns                | rec    | intergenic |           |      |
| UTI89/AS             | 5023985           | s                 | rec    | intergenic |           |      |
| UTI89/AS             | 5024000           | s                 | rec    | intergenic |           |      |
| UTI89/AS             | 5024009           | s                 | rec    | intergenic |           |      |
| UTI89/AS             | 5024018           | s                 | rec    | intergenic |           |      |
| UTI89/AS             | 5024030           | s                 | rec    | intergenic |           |      |
| UTI89/AS             | 5024039           | s                 | rec    | intergenic |           |      |
| UTI89/AS             | 5024040           | ns                | rec    | intergenic |           |      |
| UTI89/AS             | 5024097           | s                 | rec    | intergenic |           |      |
| UTI89/AS             | 5024125           | ns                | rec    | intergenic |           |      |
| UTI89/AS             | 5024149           | ns                | rec    | intergenic |           |      |
| UTI89/AS             | 5024160           | s                 | rec    | intergenic |           |      |
| UTI89/AS             | 5024180           | s                 | rec    | intergenic |           |      |
| UTI89/AS             | 5024182           | ns                | rec    | intergenic |           |      |
| UTI89/AS             | 5024237           | s                 | rec    | intergenic |           |      |
| UTI89/AS             | 5024252           | s                 | rec    | intergenic |           |      |
| UTI89/AS             | 5024273           | s                 | rec    | intergenic |           |      |
| UTI89/AS             | 5024282           | s                 | rec    | intergenic |           |      |
| UTI89/AS             | 5024300           | s                 | rec    | intergenic |           |      |
| UTI89/AS             | 5024336           | s                 | rec    | intergenic |           |      |
| UTI89/AS             | 5024343           | ns                | rec    | intergenic |           |      |
| UTI89/AS             | 5024345           | ns                | rec    | intergenic |           |      |



| lineage <sup>a</sup> | site <sup>b</sup> | mutation          |        | gene       | Gene name | Type |
|----------------------|-------------------|-------------------|--------|------------|-----------|------|
|                      |                   | type <sup>c</sup> | recomb |            |           |      |
| UTI89/AS             | 5024363           | s                 | rec    | intergenic |           |      |
| UTI89/AS             | 5024384           | s                 | rec    | intergenic |           |      |
| UTI89/AS             | 5024422           | ns                | rec    | intergenic |           |      |
| UTI89/AS             | 5024423           | ns                | rec    | intergenic |           |      |
| UTI89/AS             | 5024441           | s                 | rec    | intergenic |           |      |
| UTI89/AS             | 5024447           | s                 | rec    | intergenic |           |      |
| UTI89/AS             | 5024448           | ns                | rec    | intergenic |           |      |
| UTI89/AS             | 5024450           | ns                | rec    | intergenic |           |      |
| UTI89/AS             | 5024500           | ns                | rec    | intergenic |           |      |
| UTI89/AS             | 5024502           | ns                | rec    | intergenic |           |      |
| UTI89/AS             | 5024564           | s                 | rec    | intergenic |           |      |
| UTI89/AS             | 5024650           | ns                | rec    | intergenic |           |      |
| UTI89/AS             | 5024651           | ns                | rec    | intergenic |           |      |
| UTI89/AS             | 5024657           | s                 | rec    | intergenic |           |      |
| S88                  | 4991992           | s                 |        | intergenic |           |      |
| UTI89/AS             | 5024694           | ns                | rec    | intergenic |           |      |
| UTI89/AS             | 5024704           | ns                | rec    | intergenic |           |      |
| UTI89/AS             | 5024705           | ns                | rec    | intergenic |           |      |
| UTI89/AS             | 5024720           | s                 | rec    | intergenic |           |      |
| UTI89/AS             | 5024721           | ns                | rec    | intergenic |           |      |
| UTI89/AS             | 5024729           | s                 | rec    | intergenic |           |      |
| UTI89/AS             | 5024732           | s                 | rec    | intergenic |           |      |
| UTI89/AS             | 5024741           | s                 | rec    | intergenic |           |      |
| UTI89/AS             | 5024801           | s                 | rec    | intergenic |           |      |
| UTI89/AS             | 5024805           | ns                | rec    | intergenic |           |      |
| UTI89/AS             | 5024807           | ns                | rec    | intergenic |           |      |
| UTI89/AS             | 5024810           | s                 | rec    | intergenic |           |      |
| UTI89/AS             | 5024813           | s                 | rec    | intergenic |           |      |
| UTI89/AS             | 5024816           | s                 | rec    | intergenic |           |      |
| UTI89/AS             | 5024817           | ns                | rec    | intergenic |           |      |
| UTI89/AS             | 5024818           | ns                | rec    | intergenic |           |      |
| UTI89/AS             | 5024821           | ns                | rec    | intergenic |           |      |
| UTI89/AS             | 5024822           | ns                | rec    | intergenic |           |      |
| UTI89/AS             | 5024825           | s                 | rec    | intergenic |           |      |
| UTI89/AS             | 5024834           | s                 | rec    | intergenic |           |      |
| UTI89/AS             | 5024836           | ns                | rec    | intergenic |           |      |
| UTI89/AS             | 5024837           | ns                | rec    | intergenic |           |      |
| UTI89/AS             | 5024844           | ns                | rec    | intergenic |           |      |
| UTI89/AS             | 5024846           | ns                | rec    | intergenic |           |      |
| UTI89/AS             | 5024864           | ns                | rec    | intergenic |           |      |
| UTI89/AS             | 5024876           | s                 | rec    | intergenic |           |      |
| UTI89/AS             | 5024877           | ns                | rec    | intergenic |           |      |
| UTI89/AS             | 5024878           | ns                | rec    | intergenic |           |      |
| UTI89/AS             | 5024879           | ns                | rec    | intergenic |           |      |
| UTI89/AS             | 5024891           | s                 | rec    | intergenic |           |      |

| lineage <sup>a</sup> | site <sup>b</sup> | mutation          |        | gene       | Gene name | Type |
|----------------------|-------------------|-------------------|--------|------------|-----------|------|
|                      |                   | type <sup>c</sup> | recomb |            |           |      |
| UTI89/AS             | 5024903           | s                 | rec    | intergenic |           |      |
| UTI89/AS             | 5024909           | s                 | rec    | intergenic |           |      |
| UTI89/AS             | 5024920           | ns                | rec    | intergenic |           |      |
| UTI89/AS             | 5024939           | s                 | rec    | intergenic |           |      |
| UTI89/AS             | 5025005           | s                 | rec    | intergenic |           |      |
| UTI89/AS             | 5025008           | s                 | rec    | intergenic |           |      |
| UTI89/AS             | 5025122           | s                 | rec    | intergenic |           |      |
| UTI89/AS             | 5025140           | s                 | rec    | intergenic |           |      |
| UTI89/AS             | 5025168           | ns                | rec    | intergenic |           |      |
| UTI89/AS             | 5025182           | s                 | rec    | intergenic |           |      |
| UTI89/AS             | 5025194           | s                 | rec    | intergenic |           |      |
| UTI89/AS             | 5025203           | s                 | rec    | intergenic |           |      |
| UTI89/AS             | 5025207           | ns                | rec    | intergenic |           |      |
| UTI89/AS             | 5025212           | s                 | rec    | intergenic |           |      |
| UTI89/AS             | 5025215           | s                 | rec    | intergenic |           |      |
| UTI89/AS             | 5025217           | ns                | rec    | intergenic |           |      |
| UTI89/AS             | 5025225           | s                 | rec    | intergenic |           |      |
| UTI89/AS             | 5025227           | s                 | rec    | intergenic |           |      |
| UTI89/AS             | 5025231           | ns                | rec    | intergenic |           |      |
| UTI89/AS             | 5025235           | ns                | rec    | intergenic |           |      |
| UTI89/AS             | 5025236           | ns                | rec    | intergenic |           |      |
| UTI89/AS             | 5025241           | ns                | rec    | intergenic |           |      |
| UTI89/AS             | 5025245           | s                 | rec    | intergenic |           |      |
| UTI89/AS             | 5025248           | s                 | rec    | intergenic |           |      |
| UTI89/AS             | 5025257           | s                 | rec    | intergenic |           |      |
| UTI89/AS             | 5025267           | ns                | rec    | intergenic |           |      |
| UTI89/AS             | 5025268           | ns                | rec    | intergenic |           |      |
| UTI89/AS             | 5025278           | s                 | rec    | intergenic |           |      |
| UTI89/AS             | 5025296           | s                 | rec    | intergenic |           |      |
| UTI89/AS             | 5025299           | s                 | rec    | intergenic |           |      |
| UTI89/AS             | 5025302           | s                 | rec    | intergenic |           |      |
| UTI89/AS             | 5025314           | s                 | rec    | intergenic |           |      |
| UTI89/AS             | 5025325           | ns                | rec    | intergenic |           |      |
| UTI89/AS             | 5025326           | ns                | rec    | intergenic |           |      |
| UTI89/AS             | 5025329           | s                 | rec    | intergenic |           |      |
| UTI89/AS             | 5025347           | s                 | rec    | intergenic |           |      |
| UTI89/AS             | 5025350           | s                 | rec    | intergenic |           |      |
| UTI89/AS             | 5025351           | ns                | rec    | intergenic |           |      |
| UTI89/AS             | 5025352           | ns                | rec    | intergenic |           |      |
| UTI89/AS             | 5025353           | ns                | rec    | intergenic |           |      |
| UTI89/AS             | 5025357           | ns                | rec    | intergenic |           |      |
| UTI89/AS             | 5025358           | ns                | rec    | intergenic |           |      |
| UTI89/AS             | 5025359           | ns                | rec    | intergenic |           |      |
| UTI89/AS             | 5025365           | s                 | rec    | intergenic |           |      |
| UTI89/AS             | 5025377           | s                 | rec    | intergenic |           |      |

| lineage <sup>a</sup> | site <sup>b</sup> | mutation          |        | gene        | Gene name | Type |
|----------------------|-------------------|-------------------|--------|-------------|-----------|------|
|                      |                   | type <sup>c</sup> | recomb |             |           |      |
| UTI89/AS             | 5025380           | s                 | rec    | intergenic  |           |      |
| UTI89/AS             | 5025390           | ns                | rec    | intergenic  |           |      |
| UTI89/AS             | 5025391           | ns                | rec    | intergenic  |           |      |
| UTI89/AS             | 5025400           | ns                | rec    | intergenic  |           |      |
| UTI89/AS             | 5025401           | ns                | rec    | intergenic  |           |      |
| UTI89/AS             | 5025440           | s                 | rec    | intergenic  |           |      |
| UTI89/AS             | 5025458           | s                 | rec    | intergenic  |           |      |
| UTI89/AS             | 5025492           | ns                | rec    | intergenic  |           |      |
| UTI89/AS             | 5025493           | ns                | rec    | intergenic  |           |      |
| UTI89/AS             | 5025503           | s                 | rec    | intergenic  |           |      |
| UTI89/AS             | 5025512           | ns                | rec    | intergenic  |           |      |
| UTI89/AS             | 5025556           | ns                | rec    | intergenic  |           |      |
| UTI89/AS             | 5025558           | ns                | rec    | intergenic  |           |      |
| UTI89/AS             | 5025564           | ns                | rec    | intergenic  |           |      |
| UTI89/AS             | 5025566           | ns                | rec    | intergenic  |           |      |
| UTI89/AS             | 5025567           | ns                | rec    | intergenic  |           |      |
| UTI89/AS             | 5025571           | ns                | rec    | intergenic  |           |      |
| UTI89/AS             | 5029997           | nc                | rec    | intergenic  |           |      |
| UTI89/AS             | 5030011           | nc                | rec    | intergenic  |           |      |
| UTI89/AS             | 5030055           | ns                | rec    | UTI89_C5139 | -         | CDS  |
| UTI89/AS             | 5030079           | ns                | rec    | UTI89_C5139 | -         | CDS  |
| UTI89/AS             | 5030085           | ns                | rec    | UTI89_C5139 | -         | CDS  |
| UTI89/AS             | 5030133           | ns                | rec    | UTI89_C5139 | -         | CDS  |
| UTI89/AS             | 5030166           | ns                | rec    | UTI89_C5139 | -         | CDS  |
| UTI89/AS             | 5030169           | ns                | rec    | UTI89_C5139 | -         | CDS  |
| UTI89/AS             | 5030172           | ns                | rec    | UTI89_C5139 | -         | CDS  |
| UTI89/AS             | 5030200           | ns                | rec    | UTI89_C5139 | -         | CDS  |
| UTI89/AS             | 5030332           | ns                | rec    | UTI89_C5139 | -         | CDS  |
| UTI89/AS             | 5030335           | ns                | rec    | UTI89_C5139 | -         | CDS  |
| UTI89/AS             | 5032799           | ns                | rec    | UTI89_C5142 | -         | CDS  |
| UTI89/AS             | 5032827           | s                 | rec    | UTI89_C5142 | -         | CDS  |
| UTI89/AS             | 5032879           | nc                | rec    | intergenic  |           |      |
| UTI89/AS             | 5032891           | nc                | rec    | intergenic  |           |      |
| UTI89/AS             | 5032963           | ns                | rec    | UTI89_C5143 | -         | CDS  |
| UTI89/AS             | 5032996           | ns                | rec    | UTI89_C5143 | -         | CDS  |
| UTI89/AS             | 5032997           | s                 | rec    | UTI89_C5143 | -         | CDS  |
| UTI89/AS             | 5033003           | s                 | rec    | UTI89_C5143 | -         | CDS  |
| UTI89/AS             | 5033027           | s                 | rec    | UTI89_C5143 | -         | CDS  |
| UTI89/AS             | 5033057           | s                 | rec    | UTI89_C5143 | -         | CDS  |
| UTI89/AS             | 5033105           | ns                | rec    | UTI89_C5143 | -         | CDS  |
| UTI89/AS             | 5033106           | ns                | rec    | UTI89_C5143 | -         | CDS  |
| UTI89/AS             | 5033148           | nc                | rec    | intergenic  |           |      |
| UTI89/AS             | 5033157           | nc                | rec    | intergenic  |           |      |
| UTI89/AS             | 5033176           | nc                | rec    | intergenic  |           |      |
| UTI89/AS             | 5033191           | nc                | rec    | intergenic  |           |      |

| lineage <sup>a</sup> | site <sup>b</sup> | mutation          |        | gene        | Gene name | Type |
|----------------------|-------------------|-------------------|--------|-------------|-----------|------|
|                      |                   | type <sup>c</sup> | recomb |             |           |      |
| UTI89/AS             | 5033213           | nc                | rec    | intergenic  |           |      |
| UTI89/AS             | 5033214           | nc                | rec    | intergenic  |           |      |
| UTI89/AS             | 5033348           | nc                | rec    | intergenic  |           |      |
| UTI89/AS             | 5033413           | s                 | rec    | UTI89_C5144 | prfC      | CDS  |
| S88                  | 4999784           | s                 | rec    | UTI89_C5144 | prfC      | CDS  |
| S88                  | 4999787           | s                 | rec    | UTI89_C5144 | prfC      | CDS  |
| S88                  | 4999844           | s                 | rec    | UTI89_C5144 | prfC      | CDS  |
| S88                  | 4999877           | s                 | rec    | UTI89_C5144 | prfC      | CDS  |
| S88                  | 4999890           | s                 | rec    | UTI89_C5144 | prfC      | CDS  |
| S88                  | 4999898           | s                 | rec    | UTI89_C5144 | prfC      | CDS  |
| S88                  | 4999991           | s                 | rec    | UTI89_C5144 | prfC      | CDS  |
| S88                  | 5000036           | s                 | rec    | UTI89_C5144 | prfC      | CDS  |
| S88                  | 5000093           | s                 | rec    | UTI89_C5144 | prfC      | CDS  |
| S88                  | 5000132           | s                 | rec    | UTI89_C5144 | prfC      | CDS  |
| S88                  | 5000135           | s                 | rec    | UTI89_C5144 | prfC      | CDS  |
| S88                  | 5000198           | s                 | rec    | UTI89_C5144 | prfC      | CDS  |
| S88                  | 5000282           | s                 | rec    | UTI89_C5144 | prfC      | CDS  |
| S88                  | 5000330           | s                 | rec    | UTI89_C5144 | prfC      | CDS  |
| S88                  | 5000351           | s                 | rec    | UTI89_C5144 | prfC      | CDS  |
| S88                  | 5000390           | s                 | rec    | UTI89_C5144 | prfC      | CDS  |
| S88                  | 5000402           | s                 | rec    | UTI89_C5144 | prfC      | CDS  |
| S88                  | 5000439           | s                 | rec    | UTI89_C5144 | prfC      | CDS  |
| S88                  | 5000462           | s                 | rec    | UTI89_C5144 | prfC      | CDS  |
| S88                  | 5000486           | s                 | rec    | UTI89_C5144 | prfC      | CDS  |
| S88                  | 5000591           | s                 | rec    | UTI89_C5144 | prfC      | CDS  |
| S88                  | 5000597           | s                 | rec    | UTI89_C5144 | prfC      | CDS  |
| S88                  | 5000624           | s                 | rec    | UTI89_C5144 | prfC      | CDS  |
| S88                  | 5000642           | s                 | rec    | UTI89_C5144 | prfC      | CDS  |
| S88                  | 5000717           | s                 | rec    | UTI89_C5144 | prfC      | CDS  |
| S88                  | 5000729           | s                 | rec    | UTI89_C5144 | prfC      | CDS  |
| S88                  | 5000732           | s                 | rec    | UTI89_C5144 | prfC      | CDS  |
| S88                  | 5000816           | s                 | rec    | UTI89_C5144 | prfC      | CDS  |
| S88                  | 5000924           | s                 | rec    | UTI89_C5144 | prfC      | CDS  |
| S88                  | 5000940           | s                 | rec    | UTI89_C5144 | prfC      | CDS  |
| S88                  | 5000951           | s                 | rec    | UTI89_C5144 | prfC      | CDS  |
| S88                  | 5000954           | s                 | rec    | UTI89_C5144 | prfC      | CDS  |
| S88                  | 5001065           | s                 | rec    | UTI89_C5144 | prfC      | CDS  |
| S88                  | 5001176           | s                 | rec    | UTI89_C5144 | prfC      | CDS  |
| S88                  | 5001327           | nc                | rec    | intergenic  |           |      |
| S88                  | 5001376           | nc                | rec    | intergenic  |           |      |
| S88                  | 5001437           | nc                | rec    | intergenic  |           |      |
| S88                  | 5001499           | nc                | rec    | intergenic  |           |      |
| S88                  | 5001700           | s                 | rec    | UTI89_C5145 | osmY      | CDS  |
| S88                  | 5001856           | s                 | rec    | UTI89_C5145 | osmY      | CDS  |
| S88                  | 5001907           | s                 | rec    | UTI89_C5145 | osmY      | CDS  |

| lineage <sup>a</sup> | site <sup>b</sup> | mutation          |        | gene        | Gene name | Type |
|----------------------|-------------------|-------------------|--------|-------------|-----------|------|
|                      |                   | type <sup>c</sup> | recomb |             |           |      |
| S88                  | 5001922           | s                 | rec    | UTI89_C5145 | osmY      | CDS  |
| S88                  | 5001940           | s                 | rec    | UTI89_C5145 | osmY      | CDS  |
| S88                  | 5001946           | s                 | rec    | UTI89_C5145 | osmY      | CDS  |
| S88                  | 5001949           | s                 | rec    | UTI89_C5145 | osmY      | CDS  |
| S88                  | 5002000           | s                 | rec    | UTI89_C5145 | osmY      | CDS  |
| S88                  | 5002006           | s                 | rec    | UTI89_C5145 | osmY      | CDS  |
| S88                  | 5002030           | s                 | rec    | UTI89_C5145 | osmY      | CDS  |
| S88                  | 5002060           | s                 | rec    | UTI89_C5145 | osmY      | CDS  |
| S88                  | 5002063           | s                 | rec    | UTI89_C5145 | osmY      | CDS  |
| S88                  | 5002066           | s                 | rec    | UTI89_C5145 | osmY      | CDS  |
| S88                  | 5002069           | s                 | rec    | UTI89_C5145 | osmY      | CDS  |
| S88                  | 5002105           | s                 | rec    | UTI89_C5145 | osmY      | CDS  |
| S88                  | 5002114           | s                 | rec    | UTI89_C5145 | osmY      | CDS  |
| S88                  | 5002132           | s                 | rec    | UTI89_C5145 | osmY      | CDS  |
| S88                  | 5002147           | s                 | rec    | UTI89_C5145 | osmY      | CDS  |
| S88                  | 5002150           | s                 | rec    | UTI89_C5145 | osmY      | CDS  |
| S88                  | 5002237           | nc                | rec    | intergenic  |           |      |
| S88                  | 5002241           | nc                | rec    | intergenic  |           |      |
| S88                  | 5002426           | s                 | rec    | UTI89_C5146 | -         | CDS  |
| S88                  | 5002703           | s                 | rec    | UTI89_C5147 | yjjU      | CDS  |
| S88                  | 5002706           | s                 | rec    | UTI89_C5147 | yjjU      | CDS  |
| S88                  | 5002733           | s                 | rec    | UTI89_C5147 | yjjU      | CDS  |
| S88                  | 5002840           | ns                | rec    | UTI89_C5147 | yjjU      | CDS  |
| S88                  | 5002883           | s                 | rec    | UTI89_C5147 | yjjU      | CDS  |
| S88                  | 5002886           | s                 | rec    | UTI89_C5147 | yjjU      | CDS  |
| S88                  | 5002970           | s                 | rec    | UTI89_C5147 | yjjU      | CDS  |
| S88                  | 5002997           | s                 | rec    | UTI89_C5147 | yjjU      | CDS  |
| S88                  | 5003003           | s                 | rec    | UTI89_C5147 | yjjU      | CDS  |
| S88                  | 5003012           | s                 | rec    | UTI89_C5147 | yjjU      | CDS  |
| S88                  | 5003063           | s                 | rec    | UTI89_C5147 | yjjU      | CDS  |
| S88                  | 5003081           | s                 | rec    | UTI89_C5147 | yjjU      | CDS  |
| S88                  | 5003087           | s                 | rec    | UTI89_C5147 | yjjU      | CDS  |
| S88                  | 5003165           | s                 | rec    | UTI89_C5147 | yjjU      | CDS  |
| S88                  | 5003183           | s                 | rec    | UTI89_C5147 | yjjU      | CDS  |
| S88                  | 5003201           | s                 | rec    | UTI89_C5147 | yjjU      | CDS  |
| S88                  | 5003218           | ns                | rec    | UTI89_C5147 | yjjU      | CDS  |
| S88                  | 5003228           | s                 | rec    | UTI89_C5147 | yjjU      | CDS  |
| S88                  | 5003231           | s                 | rec    | UTI89_C5147 | yjjU      | CDS  |
| S88                  | 5003249           | s                 | rec    | UTI89_C5147 | yjjU      | CDS  |
| S88                  | 5003282           | s                 | rec    | UTI89_C5147 | yjjU      | CDS  |
| S88                  | 5003375           | ns                | rec    | UTI89_C5147 | yjjU      | CDS  |
| S88                  | 5003406           | ns                | rec    | UTI89_C5147 | yjjU      | CDS  |
| S88                  | 5003444           | s                 | rec    | UTI89_C5147 | yjjU      | CDS  |
| S88                  | 5003453           | s                 | rec    | UTI89_C5147 | yjjU      | CDS  |
| S88                  | 5003459           | s                 | rec    | UTI89_C5147 | yjjU      | CDS  |

| lineage <sup>a</sup> | site <sup>b</sup> | mutation          |        | gene        | Gene name | Type |
|----------------------|-------------------|-------------------|--------|-------------|-----------|------|
|                      |                   | type <sup>c</sup> | recomb |             |           |      |
| S88                  | 5003510           | s                 | rec    | UTI89_C5147 | yjjU      | CDS  |
| S88                  | 5003513           | s                 | rec    | UTI89_C5147 | yjjU      | CDS  |
| S88                  | 5003522           | s                 | rec    | UTI89_C5147 | yjjU      | CDS  |
| S88                  | 5003525           | s                 | rec    | UTI89_C5147 | yjjU      | CDS  |
| S88                  | 5003528           | s                 | rec    | UTI89_C5147 | yjjU      | CDS  |
| S88                  | 5003534           | s                 | rec    | UTI89_C5147 | yjjU      | CDS  |
| S88                  | 5003537           | s                 | rec    | UTI89_C5147 | yjjU      | CDS  |
| S88                  | 5003540           | s                 | rec    | UTI89_C5147 | yjjU      | CDS  |
| S88                  | 5003541           | s                 | rec    | UTI89_C5147 | yjjU      | CDS  |
| S88                  | 5003546           | s                 | rec    | UTI89_C5147 | yjjU      | CDS  |
| S88                  | 5003564           | s                 | rec    | UTI89_C5147 | yjjU      | CDS  |
| S88                  | 5003566           | ns                | rec    | UTI89_C5147 | yjjU      | CDS  |
| S88                  | 5003582           | s                 | rec    | UTI89_C5147 | yjjU      | CDS  |
| S88                  | 5003597           | s                 | rec    | UTI89_C5147 | yjjU      | CDS  |
| S88                  | 5003603           | s                 | rec    | UTI89_C5147 | yjjU      | CDS  |
| S88                  | 5003606           | s                 | rec    | UTI89_C5147 | yjjU      | CDS  |
| S88                  | 5003645           | s                 | rec    | UTI89_C5147 | yjjU      | CDS  |
| S88                  | 5003821           | s                 | rec    | UTI89_C5148 | yjjV      | CDS  |
| S88                  | 5003845           | s                 | rec    | UTI89_C5148 | yjjV      | CDS  |
| S88                  | 5003849           | ns                | rec    | UTI89_C5148 | yjjV      | CDS  |
| S88                  | 5003850           | ns                | rec    | UTI89_C5148 | yjjV      | CDS  |
| S88                  | 5003854           | s                 | rec    | UTI89_C5148 | yjjV      | CDS  |
| S88                  | 5003866           | ns                | rec    | UTI89_C5148 | yjjV      | CDS  |
| APEC                 | 5037621           | s                 |        | UTI89_C5148 | yjjV      | CDS  |
| S88                  | 5003938           | ns                | rec    | UTI89_C5148 | yjjV      | CDS  |
| S88                  | 5003964           | ns                | rec    | UTI89_C5148 | yjjV      | CDS  |
| S88                  | 5004106           | s                 | rec    | UTI89_C5148 | yjjV      | CDS  |
| S88                  | 5004155           | ns                | rec    | UTI89_C5148 | yjjV      | CDS  |
| S88                  | 5004172           | s                 | rec    | UTI89_C5148 | yjjV      | CDS  |
| S88                  | 5004211           | s                 | rec    | UTI89_C5148 | yjjV      | CDS  |
| S88                  | 5004214           | s                 | rec    | UTI89_C5148 | yjjV      | CDS  |
| S88                  | 5004241           | s                 | rec    | UTI89_C5148 | yjjV      | CDS  |
| S88                  | 5004307           | s                 | rec    | UTI89_C5148 | yjjV      | CDS  |
| S88                  | 5004325           | s                 | rec    | UTI89_C5148 | yjjV      | CDS  |
| S88                  | 5004328           | s                 | rec    | UTI89_C5148 | yjjV      | CDS  |
| S88                  | 5004343           | s                 | rec    | UTI89_C5148 | yjjV      | CDS  |
| S88                  | 5004364           | s                 | rec    | UTI89_C5148 | yjjV      | CDS  |
| S88                  | 5004370           | s                 | rec    | UTI89_C5148 | yjjV      | CDS  |
| S88                  | 5004373           | s                 | rec    | UTI89_C5148 | yjjV      | CDS  |
| S88                  | 5004379           | s                 | rec    | UTI89_C5148 | yjjV      | CDS  |
| S88                  | 5004409           | s                 | rec    | UTI89_C5148 | yjjV      | CDS  |
| S88                  | 5004412           | s                 | rec    | UTI89_C5148 | yjjV      | CDS  |
| S88                  | 5004414           | ns                | rec    | UTI89_C5148 | yjjV      | CDS  |
| S88                  | 5004436           | s                 | rec    | UTI89_C5148 | yjjV      | CDS  |
| S88                  | 5004437           | ns                | rec    | UTI89_C5148 | yjjV      | CDS  |

| lineage <sup>a</sup> | site <sup>b</sup> | mutation          |        | gene        | Gene name | Type |
|----------------------|-------------------|-------------------|--------|-------------|-----------|------|
|                      |                   | type <sup>c</sup> | recomb |             |           |      |
| S88                  | 5004441           | ns                | rec    | UTI89_C5148 | yjjV      | CDS  |
| S88                  | 5004457           | s                 | rec    | UTI89_C5148 | yjjV      | CDS  |
| S88                  | 5004488           | nc                | rec    | intergenic  |           |      |
| S88                  | 5004497           | nc                | rec    | intergenic  |           |      |
| S88                  | 5004512           | nc                | rec    | intergenic  |           |      |
| S88                  | 5004541           | nc                | rec    | intergenic  |           |      |
| S88                  | 5004564           | nc                | rec    | intergenic  |           |      |
| S88                  | 5004567           | nc                | rec    | intergenic  |           |      |
| S88                  | 5004615           | nc                | rec    | intergenic  |           |      |
| S88                  | 5004644           | nc                | rec    | intergenic  |           |      |
| S88                  | 5004665           | nc                | rec    | intergenic  |           |      |
| S88                  | 5004677           | nc                | rec    | intergenic  |           |      |
| S88                  | 5004889           | nc                | rec    | intergenic  |           |      |
| S88                  | 5004890           | nc                | rec    | intergenic  |           |      |
| S88                  | 5004910           | s                 | rec    | UTI89_C5149 | yjjW      | CDS  |
| S88                  | 5004925           | s                 | rec    | UTI89_C5149 | yjjW      | CDS  |
| S88                  | 5004944           | ns                | rec    | UTI89_C5149 | yjjW      | CDS  |
| S88                  | 5004947           | ns                | rec    | UTI89_C5149 | yjjW      | CDS  |
| S88                  | 5004948           | ns                | rec    | UTI89_C5149 | yjjW      | CDS  |
| S88                  | 5004963           | s                 | rec    | UTI89_C5149 | yjjW      | CDS  |
| S88                  | 5004964           | ns                | rec    | UTI89_C5149 | yjjW      | CDS  |
| S88                  | 5004965           | ns                | rec    | UTI89_C5149 | yjjW      | CDS  |
| S88                  | 5004967           | s                 | rec    | UTI89_C5149 | yjjW      | CDS  |
| S88                  | 5004970           | s                 | rec    | UTI89_C5149 | yjjW      | CDS  |
| S88                  | 5004973           | s                 | rec    | UTI89_C5149 | yjjW      | CDS  |
| S88                  | 5004976           | s                 | rec    | UTI89_C5149 | yjjW      | CDS  |
| S88                  | 5004993           | ns                | rec    | UTI89_C5149 | yjjW      | CDS  |
| S88                  | 5005060           | s                 | rec    | UTI89_C5149 | yjjW      | CDS  |
| S88                  | 5005072           | ns                | rec    | UTI89_C5149 | yjjW      | CDS  |
| S88                  | 5005093           | s                 | rec    | UTI89_C5149 | yjjW      | CDS  |
| S88                  | 5005123           | s                 | rec    | UTI89_C5149 | yjjW      | CDS  |
| S88                  | 5005150           | s                 | rec    | UTI89_C5149 | yjjW      | CDS  |
| S88                  | 5005169           | ns                | rec    | UTI89_C5149 | yjjW      | CDS  |
| S88                  | 5005183           | s                 | rec    | UTI89_C5149 | yjjW      | CDS  |
| S88                  | 5005207           | s                 | rec    | UTI89_C5149 | yjjW      | CDS  |
| S88                  | 5005209           | s                 | rec    | UTI89_C5149 | yjjW      | CDS  |
| S88                  | 5005213           | s                 | rec    | UTI89_C5149 | yjjW      | CDS  |
| S88                  | 5005261           | s                 | rec    | UTI89_C5149 | yjjW      | CDS  |
| S88                  | 5005318           | s                 | rec    | UTI89_C5149 | yjjW      | CDS  |
| S88                  | 5005321           | s                 | rec    | UTI89_C5149 | yjjW      | CDS  |
| S88                  | 5005335           | ns                | rec    | UTI89_C5149 | yjjW      | CDS  |
| S88                  | 5005357           | s                 | rec    | UTI89_C5149 | yjjW      | CDS  |
| S88                  | 5005386           | s                 | rec    | UTI89_C5149 | yjjW      | CDS  |
| S88                  | 5005402           | s                 | rec    | UTI89_C5149 | yjjW      | CDS  |
| S88                  | 5005408           | s                 | rec    | UTI89_C5149 | yjjW      | CDS  |

| lineage <sup>a</sup> | site <sup>b</sup> | mutation          |        | gene        | Gene name | Type |
|----------------------|-------------------|-------------------|--------|-------------|-----------|------|
|                      |                   | type <sup>c</sup> | recomb |             |           |      |
| S88                  | 5005411           | s                 | rec    | UTI89_C5149 | yjjW      | CDS  |
| S88                  | 5005426           | s                 | rec    | UTI89_C5149 | yjjW      | CDS  |
| S88                  | 5005435           | s                 | rec    | UTI89_C5149 | yjjW      | CDS  |
| S88                  | 5005438           | s                 | rec    | UTI89_C5149 | yjjW      | CDS  |
| S88                  | 5005454           | ns                | rec    | UTI89_C5149 | yjjW      | CDS  |
| S88                  | 5005462           | s                 | rec    | UTI89_C5149 | yjjW      | CDS  |
| S88                  | 5005489           | s                 | rec    | UTI89_C5149 | yjjW      | CDS  |
| S88                  | 5005495           | s                 | rec    | UTI89_C5149 | yjjW      | CDS  |
| S88                  | 5005511           | ns                | rec    | UTI89_C5149 | yjjW      | CDS  |
| S88                  | 5005531           | s                 | rec    | UTI89_C5149 | yjjW      | CDS  |
| S88                  | 5005540           | s                 | rec    | UTI89_C5149 | yjjW      | CDS  |
| S88                  | 5005543           | ns                | rec    | UTI89_C5149 | yjjW      | CDS  |
| S88                  | 5005544           | ns                | rec    | UTI89_C5149 | yjjW      | CDS  |
| S88                  | 5005546           | s                 | rec    | UTI89_C5149 | yjjW      | CDS  |
| S88                  | 5005550           | ns                | rec    | UTI89_C5149 | yjjW      | CDS  |
| S88                  | 5005556           | ns                | rec    | UTI89_C5149 | yjjW      | CDS  |
| S88                  | 5005570           | s                 | rec    | UTI89_C5149 | yjjW      | CDS  |
| S88                  | 5005600           | s                 | rec    | UTI89_C5149 | yjjW      | CDS  |
| S88                  | 5005612           | s                 | rec    | UTI89_C5149 | yjjW      | CDS  |
| S88                  | 5005615           | s                 | rec    | UTI89_C5149 | yjjW      | CDS  |
| S88                  | 5005618           | s                 | rec    | UTI89_C5149 | yjjW      | CDS  |
| S88                  | 5005624           | s                 | rec    | UTI89_C5149 | yjjW      | CDS  |
| S88                  | 5005627           | s                 | rec    | UTI89_C5149 | yjjW      | CDS  |
| S88                  | 5005630           | s                 | rec    | UTI89_C5149 | yjjW      | CDS  |
| S88                  | 5005820           | s                 | rec    | UTI89_C5150 | yjjI      | CDS  |
| S88                  | 5005949           | s                 | rec    | UTI89_C5150 | yjjI      | CDS  |
| S88                  | 5005982           | s                 | rec    | UTI89_C5150 | yjjI      | CDS  |
| S88                  | 5005991           | s                 | rec    | UTI89_C5150 | yjjI      | CDS  |
| S88                  | 5006081           | s                 | rec    | UTI89_C5150 | yjjI      | CDS  |
| S88                  | 5006099           | s                 | rec    | UTI89_C5150 | yjjI      | CDS  |
| S88                  | 5006144           | s                 | rec    | UTI89_C5150 | yjjI      | CDS  |
| S88                  | 5006231           | s                 | rec    | UTI89_C5150 | yjjI      | CDS  |
| S88                  | 5006243           | s                 | rec    | UTI89_C5150 | yjjI      | CDS  |
| S88                  | 5006261           | s                 | rec    | UTI89_C5150 | yjjI      | CDS  |
| S88                  | 5006276           | s                 | rec    | UTI89_C5150 | yjjI      | CDS  |
| S88                  | 5006342           | s                 | rec    | UTI89_C5150 | yjjI      | CDS  |
| S88                  | 5006456           | s                 | rec    | UTI89_C5150 | yjjI      | CDS  |
| S88                  | 5006492           | ns                | rec    | UTI89_C5150 | yjjI      | CDS  |
| S88                  | 5006504           | s                 | rec    | UTI89_C5150 | yjjI      | CDS  |
| S88                  | 5006531           | s                 | rec    | UTI89_C5150 | yjjI      | CDS  |
| S88                  | 5006669           | s                 | rec    | UTI89_C5150 | yjjI      | CDS  |
| S88                  | 5006705           | ns                | rec    | UTI89_C5150 | yjjI      | CDS  |
| S88                  | 5006749           | s                 | rec    | UTI89_C5150 | yjjI      | CDS  |
| S88                  | 5006756           | s                 | rec    | UTI89_C5150 | yjjI      | CDS  |
| S88                  | 5006768           | s                 | rec    | UTI89_C5150 | yjjI      | CDS  |



| lineage <sup>a</sup> | site <sup>b</sup> | mutation          |        | gene        | Gene name | Type |
|----------------------|-------------------|-------------------|--------|-------------|-----------|------|
|                      |                   | type <sup>c</sup> | recomb |             |           |      |
| S88                  | 5006774           | s                 | rec    | UTI89_C5150 | yj1       | CDS  |
| S88                  | 5006810           | s                 | rec    | UTI89_C5150 | yj1       | CDS  |
| S88                  | 5006869           | ns                | rec    | UTI89_C5150 | yj1       | CDS  |
| APEC                 | 5040452           | s                 |        | UTI89_C5150 | yj1       | CDS  |
| S88                  | 5006963           | s                 | rec    | UTI89_C5150 | yj1       | CDS  |
| S88                  | 5007005           | s                 | rec    | UTI89_C5150 | yj1       | CDS  |
| S88                  | 5007044           | s                 | rec    | UTI89_C5150 | yj1       | CDS  |
| S88                  | 5007049           | s                 | rec    | UTI89_C5150 | yj1       | CDS  |
| S88                  | 5007122           | s                 | rec    | UTI89_C5150 | yj1       | CDS  |
| S88                  | 5007125           | s                 | rec    | UTI89_C5150 | yj1       | CDS  |
| S88                  | 5007155           | s                 | rec    | UTI89_C5150 | yj1       | CDS  |
| S88                  | 5007224           | s                 | rec    | UTI89_C5150 | yj1       | CDS  |
| S88                  | 5007227           | s                 | rec    | UTI89_C5150 | yj1       | CDS  |
| S88                  | 5007459           | nc                | rec    | intergenic  |           |      |
| S88                  | 5007460           | nc                | rec    | intergenic  |           |      |
| S88                  | 5007621           | s                 | rec    | UTI89_C5152 | deoC      | CDS  |
| S88                  | 5007720           | s                 | rec    | UTI89_C5152 | deoC      | CDS  |
| S88                  | 5007765           | s                 | rec    | UTI89_C5152 | deoC      | CDS  |
| S88                  | 5007795           | ns                | rec    | UTI89_C5152 | deoC      | CDS  |
| S88                  | 5007837           | s                 | rec    | UTI89_C5152 | deoC      | CDS  |
| S88                  | 5007852           | s                 | rec    | UTI89_C5152 | deoC      | CDS  |
| S88                  | 5007933           | s                 | rec    | UTI89_C5152 | deoC      | CDS  |
| S88                  | 5007936           | s                 | rec    | UTI89_C5152 | deoC      | CDS  |
| S88                  | 5007942           | s                 | rec    | UTI89_C5152 | deoC      | CDS  |
| S88                  | 5007960           | s                 | rec    | UTI89_C5152 | deoC      | CDS  |
| S88                  | 5007963           | s                 | rec    | UTI89_C5152 | deoC      | CDS  |
| S88                  | 5008032           | s                 | rec    | UTI89_C5152 | deoC      | CDS  |
| S88                  | 5008071           | s                 | rec    | UTI89_C5152 | deoC      | CDS  |
| S88                  | 5008113           | s                 | rec    | UTI89_C5152 | deoC      | CDS  |
| S88                  | 5008133           | ns                | rec    | UTI89_C5152 | deoC      | CDS  |
| S88                  | 5008227           | s                 | rec    | UTI89_C5152 | deoC      | CDS  |
| S88                  | 5008251           | s                 | rec    | UTI89_C5152 | deoC      | CDS  |
| S88                  | 5008261           | s                 | rec    | UTI89_C5152 | deoC      | CDS  |
| S88                  | 5008284           | s                 | rec    | UTI89_C5152 | deoC      | CDS  |
| S88                  | 5008290           | s                 | rec    | UTI89_C5152 | deoC      | CDS  |
| S88                  | 5008437           | s                 | rec    | UTI89_C5153 | deoA      | CDS  |
| S88                  | 5008503           | s                 | rec    | UTI89_C5153 | deoA      | CDS  |
| S88                  | 5008533           | s                 | rec    | UTI89_C5153 | deoA      | CDS  |
| S88                  | 5008707           | s                 | rec    | UTI89_C5153 | deoA      | CDS  |
| S88                  | 5008713           | s                 | rec    | UTI89_C5153 | deoA      | CDS  |
| S88                  | 5008716           | s                 | rec    | UTI89_C5153 | deoA      | CDS  |
| S88                  | 5008758           | s                 | rec    | UTI89_C5153 | deoA      | CDS  |
| S88                  | 5008764           | s                 | rec    | UTI89_C5153 | deoA      | CDS  |
| S88                  | 5008788           | s                 | rec    | UTI89_C5153 | deoA      | CDS  |
| S88                  | 5008914           | s                 | rec    | UTI89_C5153 | deoA      | CDS  |

| lineage <sup>a</sup> | site <sup>b</sup> | mutation          |        | gene        | Gene name | Type |
|----------------------|-------------------|-------------------|--------|-------------|-----------|------|
|                      |                   | type <sup>c</sup> | recomb |             |           |      |
| S88                  | 5008923           | s                 | rec    | UTI89_C5153 | deoA      | CDS  |
| S88                  | 5008938           | s                 | rec    | UTI89_C5153 | deoA      | CDS  |
| S88                  | 5008962           | s                 | rec    | UTI89_C5153 | deoA      | CDS  |
| S88                  | 5008983           | s                 | rec    | UTI89_C5153 | deoA      | CDS  |
| S88                  | 5008986           | s                 | rec    | UTI89_C5153 | deoA      | CDS  |
| S88                  | 5009025           | s                 | rec    | UTI89_C5153 | deoA      | CDS  |
| S88                  | 5009172           | s                 | rec    | UTI89_C5153 | deoA      | CDS  |
| S88                  | 5009283           | s                 | rec    | UTI89_C5153 | deoA      | CDS  |
| S88                  | 5009323           | ns                | rec    | UTI89_C5153 | deoA      | CDS  |
| S88                  | 5009400           | s                 | rec    | UTI89_C5153 | deoA      | CDS  |
| S88                  | 5009496           | s                 | rec    | UTI89_C5153 | deoA      | CDS  |
| S88                  | 5009523           | s                 | rec    | UTI89_C5153 | deoA      | CDS  |
| S88                  | 5009533           | ns                | rec    | UTI89_C5153 | deoA      | CDS  |
| S88                  | 5009649           | s                 | rec    | UTI89_C5153 | deoA      | CDS  |
| S88                  | 5009675           | ns                | rec    | UTI89_C5153 | deoA      | CDS  |
| S88                  | 5009955           | s                 | rec    | UTI89_C5154 | deoB      | CDS  |
| S88                  | 5009956           | ns                | rec    | UTI89_C5154 | deoB      | CDS  |
| S88                  | 5010000           | s                 | rec    | UTI89_C5154 | deoB      | CDS  |
| S88                  | 5010054           | s                 | rec    | UTI89_C5154 | deoB      | CDS  |
| S88                  | 5010114           | s                 | rec    | UTI89_C5154 | deoB      | CDS  |
| S88                  | 5010138           | s                 | rec    | UTI89_C5154 | deoB      | CDS  |
| S88                  | 5010222           | s                 | rec    | UTI89_C5154 | deoB      | CDS  |
| S88                  | 5010387           | s                 | rec    | UTI89_C5154 | deoB      | CDS  |
| S88                  | 5010414           | s                 | rec    | UTI89_C5154 | deoB      | CDS  |
| S88                  | 5010444           | s                 | rec    | UTI89_C5154 | deoB      | CDS  |
| S88                  | 5010486           | s                 | rec    | UTI89_C5154 | deoB      | CDS  |
| S88                  | 5010504           | s                 | rec    | UTI89_C5154 | deoB      | CDS  |
| S88                  | 5010591           | s                 | rec    | UTI89_C5154 | deoB      | CDS  |
| S88                  | 5010606           | s                 | rec    | UTI89_C5154 | deoB      | CDS  |
| S88                  | 5010651           | s                 | rec    | UTI89_C5154 | deoB      | CDS  |
| S88                  | 5010780           | s                 | rec    | UTI89_C5154 | deoB      | CDS  |
| S88                  | 5010826           | s                 | rec    | UTI89_C5154 | deoB      | CDS  |
| S88                  | 5010843           | s                 | rec    | UTI89_C5154 | deoB      | CDS  |
| S88                  | 5010846           | s                 | rec    | UTI89_C5154 | deoB      | CDS  |
| S88                  | 5010852           | s                 | rec    | UTI89_C5154 | deoB      | CDS  |
| S88                  | 5010858           | s                 | rec    | UTI89_C5154 | deoB      | CDS  |
| S88                  | 5010873           | s                 | rec    | UTI89_C5154 | deoB      | CDS  |
| S88                  | 5010876           | s                 | rec    | UTI89_C5154 | deoB      | CDS  |
| S88                  | 5010927           | s                 | rec    | UTI89_C5154 | deoB      | CDS  |
| S88                  | 5010930           | s                 | rec    | UTI89_C5154 | deoB      | CDS  |
| S88                  | 5010942           | s                 | rec    | UTI89_C5154 | deoB      | CDS  |
| S88                  | 5010948           | s                 | rec    | UTI89_C5154 | deoB      | CDS  |
| S88                  | 5010951           | s                 | rec    | UTI89_C5154 | deoB      | CDS  |
| S88                  | 5010954           | s                 | rec    | UTI89_C5154 | deoB      | CDS  |
| S88                  | 5011064           | s                 | rec    | UTI89_C5155 | deoD      | CDS  |

| lineage <sup>a</sup> | site <sup>b</sup> | mutation          |        | gene        | Gene name | Type |
|----------------------|-------------------|-------------------|--------|-------------|-----------|------|
|                      |                   | type <sup>c</sup> | recomb |             |           |      |
| S88                  | 5011065           | ns                | rec    | UTI89_C5155 | deoD      | CDS  |
| S88                  | 5011079           | s                 | rec    | UTI89_C5155 | deoD      | CDS  |
| S88                  | 5011080           | ns                | rec    | UTI89_C5155 | deoD      | CDS  |
| S88                  | 5011102           | ns                | rec    | UTI89_C5155 | deoD      | CDS  |
| S88                  | 5011103           | ns                | rec    | UTI89_C5155 | deoD      | CDS  |
| S88                  | 5011112           | s                 | rec    | UTI89_C5155 | deoD      | CDS  |
| S88                  | 5011142           | s                 | rec    | UTI89_C5155 | deoD      | CDS  |
| S88                  | 5011166           | s                 | rec    | UTI89_C5155 | deoD      | CDS  |
| S88                  | 5011253           | s                 | rec    | UTI89_C5155 | deoD      | CDS  |
| S88                  | 5011289           | s                 | rec    | UTI89_C5155 | deoD      | CDS  |
| S88                  | 5011340           | s                 | rec    | UTI89_C5155 | deoD      | CDS  |
| S88                  | 5011370           | s                 | rec    | UTI89_C5155 | deoD      | CDS  |
| S88                  | 5011385           | s                 | rec    | UTI89_C5155 | deoD      | CDS  |
| S88                  | 5011517           | s                 | rec    | UTI89_C5155 | deoD      | CDS  |
| S88                  | 5011523           | s                 | rec    | UTI89_C5155 | deoD      | CDS  |
| S88                  | 5011526           | s                 | rec    | UTI89_C5155 | deoD      | CDS  |
| S88                  | 5011529           | s                 | rec    | UTI89_C5155 | deoD      | CDS  |
| S88                  | 5011541           | s                 | rec    | UTI89_C5155 | deoD      | CDS  |
| S88                  | 5011542           | ns                | rec    | UTI89_C5155 | deoD      | CDS  |
| S88                  | 5011553           | s                 | rec    | UTI89_C5155 | deoD      | CDS  |
| S88                  | 5011556           | s                 | rec    | UTI89_C5155 | deoD      | CDS  |
| S88                  | 5011631           | s                 | rec    | UTI89_C5155 | deoD      | CDS  |
| S88                  | 5011712           | s                 | rec    | UTI89_C5155 | deoD      | CDS  |
| S88                  | 5011763           | s                 | rec    | UTI89_C5155 | deoD      | CDS  |
| S88                  | 5011790           | s                 | rec    | UTI89_C5155 | deoD      | CDS  |
| S88                  | 5013027           | s                 | rec    | UTI89_C5156 | yjjJ      | CDS  |
| S88                  | 5013036           | s                 | rec    | UTI89_C5156 | yjjJ      | CDS  |
| S88                  | 5013054           | s                 | rec    | UTI89_C5156 | yjjJ      | CDS  |
| S88                  | 5013095           | ns                | rec    | UTI89_C5156 | yjjJ      | CDS  |
| S88                  | 5013114           | s                 | rec    | UTI89_C5156 | yjjJ      | CDS  |
| S88                  | 5013121           | s                 | rec    | UTI89_C5156 | yjjJ      | CDS  |
| S88                  | 5013146           | ns                | rec    | UTI89_C5156 | yjjJ      | CDS  |
| S88                  | 5013171           | s                 | rec    | UTI89_C5156 | yjjJ      | CDS  |
| S88                  | 5013174           | s                 | rec    | UTI89_C5156 | yjjJ      | CDS  |
| S88                  | 5013223           | ns                | rec    | UTI89_C5156 | yjjJ      | CDS  |
| S88                  | 5013246           | s                 | rec    | UTI89_C5156 | yjjJ      | CDS  |
| S88                  | 5013261           | s                 | rec    | UTI89_C5156 | yjjJ      | CDS  |
| S88                  | 5013296           | ns                | rec    | UTI89_C5156 | yjjJ      | CDS  |
| S88                  | 5013325           | s                 | rec    | UTI89_C5157 | lpIA      | CDS  |
| S88                  | 5013327           | s                 | rec    | UTI89_C5157 | lpIA      | CDS  |
| S88                  | 5013328           | s                 | rec    | UTI89_C5157 | lpIA      | CDS  |
| S88                  | 5013331           | s                 | rec    | UTI89_C5157 | lpIA      | CDS  |
| S88                  | 5013340           | ns                | rec    | UTI89_C5157 | lpIA      | CDS  |
| S88                  | 5013352           | s                 | rec    | UTI89_C5157 | lpIA      | CDS  |
| S88                  | 5013393           | s                 | rec    | UTI89_C5157 | lpIA      | CDS  |

| lineage <sup>a</sup> | site <sup>b</sup> | mutation          |        | gene        | Gene name | Type |
|----------------------|-------------------|-------------------|--------|-------------|-----------|------|
|                      |                   | type <sup>c</sup> | recomb |             |           |      |
| S88                  | 5013424           | s                 | rec    | UTI89_C5157 | lplA      | CDS  |
| S88                  | 5013436           | s                 | rec    | UTI89_C5157 | lplA      | CDS  |
| S88                  | 5013451           | s                 | rec    | UTI89_C5157 | lplA      | CDS  |
| S88                  | 5013484           | s                 | rec    | UTI89_C5157 | lplA      | CDS  |
| S88                  | 5013669           | ns                | rec    | UTI89_C5157 | lplA      | CDS  |
| S88                  | 5013763           | s                 | rec    | UTI89_C5157 | lplA      | CDS  |
| S88                  | 5013765           | s                 | rec    | UTI89_C5157 | lplA      | CDS  |
| S88                  | 5013768           | s                 | rec    | UTI89_C5157 | lplA      | CDS  |
| S88                  | 5013769           | s                 | rec    | UTI89_C5157 | lplA      | CDS  |
| S88                  | 5013775           | s                 | rec    | UTI89_C5157 | lplA      | CDS  |
| S88                  | 5013778           | s                 | rec    | UTI89_C5157 | lplA      | CDS  |
| S88                  | 5013796           | s                 | rec    | UTI89_C5157 | lplA      | CDS  |
| S88                  | 5013799           | s                 | rec    | UTI89_C5157 | lplA      | CDS  |
| S88                  | 5013802           | s                 | rec    | UTI89_C5157 | lplA      | CDS  |
| APEC                 | 5051251           | s                 |        | UTI89_C5161 | nadR      | CDS  |
| S88                  | 5017839           | ns                |        | UTI89_C5161 | nadR      | CDS  |

<sup>a</sup> AS: allocated to the lineage to the common ancestor of APEC 01 and S88; UTI89/AS: allocated to the SNPs at the divergence of UTI89 and AS; APEC/S88: allocated to the SNPs at the divergence of APEC 01 and S88.

<sup>b</sup> For indels the base indicated is the base before the insertion or deletion.

<sup>c</sup> ins, insertion; del, deletion; indel, insertion or deletion; nc, in non-coding genes; ns, non-synonymous; s, synonymous. number after "ins" or "del" or "indel" is number of bases if greater than 1
