# Supplementary material for: Derivation of Escherichia coli O157:H7 from Its O55:H7 Precursor
Source: PubMed Central journal article supplement (PMC2806823; doi:10.1371/journal.pone.0008700), 2010-01-14
Supplement: pone.0008700.s011.pdf [file pone.0008700.s011.pdf]

| <b>Indel<sup>a</sup></b> | <b>Lineage<sup>b</sup></b> | <b>Type<sup>c</sup></b> | <b>Site<sup>d</sup></b> | <b>Length</b> | <b>Name or range</b>              |
|--------------------------|----------------------------|-------------------------|-------------------------|---------------|-----------------------------------|
| 1                        | CB9615                     | del                     | 248790                  | 28            | putative macrophage toxin         |
| 2                        | CB9615                     | ins                     | 269801                  | 2565          | rhsG                              |
| 3                        | CB9615                     | del                     | 273929                  | 36            | hypothetical protein              |
| 4                        | CB9615                     | ins                     | 288595                  | 88            | intergenic                        |
| 5                        | O157                       | ins                     | 300076                  | 4904          | CP-933H & Sp1 part 1              |
| 6                        | Sakai                      | ins                     | 304980                  | 1830          | inversion between Sp1 and CP-933H |
| 7                        | EDL933                     | ins                     | 304981                  | 1830          | inversion between Sp1 and CP-933H |
| 8                        | O157                       | ins                     | 306810                  | 3788          | CP-933H & Sp1 part 3              |
| 9                        | CB9615                     | ins                     | 302638                  | 48949         | Ep1                               |
| 10                       | O157                       | ins                     | 345357                  | 2450          | ISEc8                             |
| 11                       | O157                       | del                     | 368438                  | 1037          | autotransporter                   |
| 12                       | O157                       | ins                     | 411141                  | 188           | part of O-island #18              |
| 13                       | O157                       | del                     | 433522                  | 303           | intergenic                        |
| 14                       | O157                       | del                     | 589397                  | 300           | hypothetical protein              |
| 15                       | Sakai                      | ins                     | 596503                  | 309           | hypothetical protein              |
| 16                       | O157                       | del                     | 598209                  | 318           | hypothetical protein              |
| 17                       | CB9615                     | ins                     | 697268                  | 49415         | Ep3                               |
| 18                       | EDL933                     | ins                     | 670387                  | 87            | macrophage toxin                  |
| 19                       | CB9615                     | ins                     | 865971                  | 35            | hypothetical protein              |
| 20                       | EDL933                     | ins                     | 810985                  | 1871          | rhsC                              |
| 21                       | CB9615                     | del                     | 935055                  | 60            | putative symport protein          |
| 22                       | CB9615                     | ins                     | 950886                  | 81            | tolA                              |
| 23                       | O157                       | del                     | 865671                  | 109           | tRNA                              |
| 24                       | CB9615                     | ins                     | 985624                  | 7432          | Ep4 part                          |
| 25                       | CB9615                     | del                     | 1019441                 | 27            | lomK                              |
| 26                       | O157                       | del                     | 922439                  | 27            | Ail/Lom family protein            |
| 27                       | EDL933                     | ins                     | 1058635                 | 87563         | SpLE1 copy                        |
| 28                       | O157                       | ins                     | 1161156                 | 15541         | CP-933M & Sp4 part 1              |
| 29                       | Sakai                      | ins                     | 1176695                 | 32577         | Sp4 part 2                        |
| 30                       | EDL933                     | ins                     | 1265920                 | 28169         | CP-933M part 2                    |
| 31                       | O157                       | ins                     | 1209272                 | 1534          | CP-933M & Sp4 part 3              |
| 32                       | CB9615                     | ins                     | 1290089                 | 45            | yccE                              |
| 33                       | O157                       | ins                     | 1246025                 | 8400          | BP-933W & Sp5 part 1              |
| 34                       | Sakai                      | ins                     | 1254424                 | 10013         | Sp5 part 2                        |
| 35                       | EDL933                     | ins                     | 1339242                 | 10520         | BP-933W part 2                    |
| 36                       | O157                       | ins                     | 1264437                 | 5926          | BP-933W & Sp5 part 3              |
| 37                       | Sakai                      | ins                     | 1270363                 | 1314          | IS629 in Sp5                      |
| 38                       | O157                       | ins                     | 1271677                 | 35340         | BP-933W & Sp5 part 4              |
| 39                       | Sakai                      | ins                     | 1307016                 | 271           | zinc finger protein in Sp 5       |
| 40                       | O157                       | ins                     | 1307287                 | 1299          | BP-933W & Sp5 part 5              |
| 41                       | EDL933                     | ins                     | 1392327                 | 31            | intergenic                        |
| 42                       | O157                       | ins                     | 1308586                 | 147           | BP-933W & Sp5 part 5              |
| 43                       | O157                       | del                     | 1309217                 | 66            | intergenic                        |
| 44                       | CB9615                     | del                     | 1312390                 | 81            | intergenic                        |

| <b>Indel<sup>a</sup></b> | <b>Lineage<sup>b</sup></b> | <b>Type<sup>c</sup></b> | <b>Site<sup>d</sup></b> | <b>Length</b> | <b>Name or range</b>        |
|--------------------------|----------------------------|-------------------------|-------------------------|---------------|-----------------------------|
| 45                       | O157                       | ins                     | 1370470                 | 84306         | SpLE1                       |
| 46                       | EDL933                     | ins                     | 1538545                 | 1313          | IS629                       |
| 47                       | O157                       | ins                     | 1454773                 | 1946          | SpLE1                       |
| 48                       | O157                       | ins                     | 1541482                 | 11589         | CP-933N & Sp6 part 1        |
| 49                       | Sakai                      | ins                     | 1553071                 | 18327         | Sp6 part 2                  |
| 50                       | EDL933                     | ins                     | 1638167                 | 19370         | CP-933N part 2              |
| 51                       | O157                       | ins                     | 1571398                 | 1907          | CP-933N & Sp6 part 3        |
| 52                       | Sakai                      | ins                     | 1573305                 | 2756          | Sp6 part 4                  |
| 53                       | EDL933                     | ins                     | 1659442                 | 594           | CP-933N part 4              |
| 54                       | O157                       | ins                     | 1576061                 | 13846         | CP-933N & Sp6 part 5        |
| 55                       | O157                       | ins                     | 1597058                 | 12576         | CP-933C & Sp7               |
| 56                       | CB9615                     | ins                     | 1447061                 | 8328          | Ep5                         |
| 57                       | O157                       | ins                     | 1618152                 | 23624         | CP-933X & Sp8 part 1        |
| 58                       | Sakai                      | ins                     | 1641773                 | 7321          | Sp8 part 2                  |
| 59                       | EDL933                     | ins                     | 1725749                 | 15130         | CP-933X part 2              |
| 60                       | O157                       | ins                     | 1649094                 | 13861         | CP-933X & Sp8 part 3        |
| 61                       | Sakai                      | ins                     | 1662945                 | 389           | hypothetical protein in Sp8 |
| 62                       | O157                       | ins                     | 1663334                 | 1306          | CP-933X & Sp8 part 4        |
| 63                       | CB9615                     | ins                     | 1463904                 | 14477         | elbA-ypjA                   |
| 64                       | O157                       | ins                     | 1678776                 | 33            | intergenic                  |
| 65                       | O157                       | del                     | 1681748                 | 1868          | ipaH                        |
| 66                       | O157                       | ins                     | 1685462                 | 1313          | IS629                       |
| 67                       | O157                       | del                     | 1700128                 | 3154          | dhaR-ycgV                   |
| 68                       | EDL933                     | ins                     | 1806889                 | 529           | hypothetical protein        |
| 69                       | CB9615                     | del                     | 1549532                 | 178           | hypothetical protein        |
| 70                       | CB9615                     | del                     | 1577103                 | 21            | exoO                        |
| 71                       | O157                       | del                     | 1762254                 | 85            | intergenic                  |
| 72                       | O157                       | ins                     | 1771044                 | 3644          | CP-933O-1 and Sp9 part 1    |
| 73                       | Sakai                      | ins                     | 1774688                 | 22068         | Sp9 part 2,3                |
| 74                       | EDL933                     | ins                     | 1866628                 | 5717          | CP-933O-1 part 2            |
| 75                       | CB9615                     | ins                     | 1588344                 | 39169         | Ep6 part                    |
| 76                       | O157                       | ins                     | 1796756                 | 18845         | CP-933P & Sp9 part 4        |
| 77                       | CB9615                     | ins                     | 1627513                 | 169           | yciD                        |
| 78                       | O157                       | ins                     | 1909167                 | 1313          | IS629                       |
| 79                       | O157                       | ins                     | 1925340                 | 18516         | CP-933R and Sp10 part 1     |
| 80                       | Sakai                      | ins                     | 1943853                 | 24157         | Sp10 part 2                 |
| 81                       | EDL933                     | ins                     | 2143310                 | 22839         | CP-933R part 2              |
| 82                       | O157                       | ins                     | 1968010                 | 1399          | CP-933R and Sp10 part 3     |
| 83                       | CB9615                     | ins                     | 1736116                 | 37474         | Ep7 part                    |
| 84                       | CB9615                     | ins                     | 1776450                 | 348           | intergenic                  |
| 85                       | O157                       | del                     | 1974047                 | 20            | ompN                        |
| 86                       | O55/O157                   | indel                   | 1984517                 | 33            | hypothetical protein        |
| 87                       | O55/O157                   | indel                   | 1984550                 | 57            | hypothetical protein        |
| 88                       | CB9615                     | del                     | 1851898                 | 37            | rhsE                        |
| 89                       | O157                       | del                     | 2047473                 | 37            | rhsE                        |
| 90                       | CB9615                     | del                     | 1877926                 | 178           | intergenic                  |

| Indel <sup>a</sup> | Lineage <sup>b</sup> | Type <sup>c</sup> | Site <sup>d</sup> | Length | Name or range              |
|--------------------|----------------------|-------------------|-------------------|--------|----------------------------|
| 91                 | O157                 | del               | 2116465           | 619    | hipAB                      |
| 92                 | O157                 | ins               | 2158572           | 2864   | CP-9330-2 & Sp11 part 4    |
| 93                 | Sakai                | ins               | 2161436           | 27173  | Sp11 part 3                |
| 94                 | EDL933               | ins               | 1927034           | 32923  | CP-9330-2 part 3           |
| 95                 | O157                 | ins               | 2188609           | 15631  | CP-9330-2 and Sp11 part 2  |
| 96                 | Sakai                | ins               | 2204236           | 1313   | IS629 in Sp11              |
| 97                 | O157                 | ins               | 2205549           | 114    | CP-9330-2 and Sp11 part 1  |
| 98                 | O157                 | ins               | 2206518           | 2456   | IS in CP-9330-1 & Sp12     |
| 99                 | Sakai                | ins               | 2211676           | 7589   | Sp12 part 3                |
| 100                | EDL933               | ins               | 2290422           | 4126   | CP-933P part 3             |
| 101                | CB9615               | ins               | 1967051           | 21468  | Ep8                        |
| 102                | O157                 | ins               | 2219265           | 14664  | CP-933P & Sp12 part 2      |
| 103                | O157                 | ins               | 2237104           | 17757  | CP-933P & Sp12 part 1      |
| 104                | CB9615               | ins               | 1991694           | 18166  | Ep9                        |
| 105                | EDL933               | del               | 2383841           | 96     | rsxC                       |
| 106                | CB9615               | ins               | 2152246           | 35751  | Ep10                       |
| 107                | O157                 | ins               | 2454184           | 1313   | IS629                      |
| 108                | CB9615               | del               | 2252700           | 778    | putative transport protein |
| 109                | O157                 | ins               | 2593022           | 21120  | CP-933T & Sp13             |
| 110                | O157                 | ins               | 2641063           | 62     | flil                       |
| 111                | Sakai                | ins               | 2670403           | 24417  | Sp14 part 2                |
| 112                | EDL933               | ins               | 2745620           | 25564  | CP-933U part 2             |
| 113                | O157                 | ins               | 2694820           | 17138  | CP-933U & Sp14 part 1      |
| 114                | CB9615               | ins               | 2440191           | 46474  | Ep11                       |
| 115                | O157                 | ins               | 2735504           | 2450   | ISEc8                      |
| 116                | O157                 | ins               | 2741819           | 1314   | IS629                      |
| 117                | Sakai                | ins               | 2743133           | 86     | hypothetical protein       |
| 118                | O157                 | del               | 2743218           | 8805   | EpLE1                      |
| 119                | EDL933               | del               | 2819497           | 6068   | yafZX-yeeS                 |
| 120                | O157                 | ins               | 2761713           | 210    | hypothetical protein       |
| 121                | O157                 | del               | 2761922           | 653    | yoeB-yefM                  |
| 122                | O157                 | ins               | 2771874           | 55     | gnd                        |
| 123                | CB9615               | ins               | 2551984           | 3919   | O-antigen                  |
| 124                | O157                 | ins               | 2773347           | 2139   | O-antigen                  |
| 125                | CB9615               | ins               | 2557321           | 4812   | O-antigen                  |
| 126                | O157                 | ins               | 2777741           | 60     | manC                       |
| 127                | O157                 | del               | 2777800           | 60     | manC                       |
| 128                | O157                 | ins               | 2778783           | 985    | O-antigen                  |
| 129                | CB9615               | ins               | 2565428           | 163    | gmd                        |
| 130                | O157                 | ins               | 2780874           | 6716   | O-antigen                  |
| 131                | CB9615               | ins               | 2566697           | 1481   | wbgM                       |
| 132                | O157                 | ins               | 2793816           | 123    | intergenic                 |
| 133                | O55/O157             | indel             | 2796854           | 35     | intergenic                 |
| 134                | O55/O157             | indel             | 2577332           | 116    | intergenic                 |
| 135                | O157                 | del               | 2798333           | 20     | intergenic                 |
| 136                | O157                 | ins               | 2798334           | 111    | intergenic                 |

| <b>Indel<sup>a</sup></b> | <b>Lineage<sup>b</sup></b> | <b>Type<sup>c</sup></b> | <b>Site<sup>d</sup></b> | <b>Length</b> | <b>Name or range</b>                 |
|--------------------------|----------------------------|-------------------------|-------------------------|---------------|--------------------------------------|
| 137                      | O157                       | ins                     | 2828986                 | 330           | putative membrane protein            |
| 138                      | O157                       | del                     | 2841001                 | 760           | Plasmid stabilization system protein |
| 139                      | O157                       | ins                     | 2844410                 | 88            | hypothetical protein                 |
| 140                      | CB9615                     | ins                     | 2625293                 | 9728          | ribitol gene cluster                 |
| 141                      | O157                       | ins                     | 2863193                 | 971           | yehA                                 |
| 142                      | O157                       | del                     | 2864163                 | 976           | yehA                                 |
| 143                      | CB9615                     | ins                     | 2667743                 | 47            | molR_C                               |
| 144                      | O157                       | ins                     | 2883087                 | 609           | hypothetical protein                 |
| 145                      | O157                       | ins                     | 2890776                 | 1313          | IS629                                |
| 146                      | O157                       | ins                     | 2895926                 | 2848          | CP-933V & Sp15 part 3                |
| 147                      | Sakai                      | ins                     | 2898773                 | 20176         | Sp15 part 2                          |
| 148                      | EDL933                     | ins                     | 2969005                 | 21207         | CP-933V part 2                       |
| 149                      | O157                       | ins                     | 2918949                 | 24861         | CP-933V & Sp15 part 1                |
| 150                      | CB9615                     | ins                     | 2797724                 | 1450          | IS-yfaS                              |
| 151                      | Sakai                      | ins                     | 3088840                 | 1313          | IS629                                |
| 152                      | CB9615                     | ins                     | 2897983                 | 182           | intergenic                           |
| 153                      | EDL933                     | del                     | 3314859                 | 115           | ala-tRNA                             |
| 154                      | CB9615                     | ins                     | 3161159                 | 41483         | Ep13                                 |
| 155                      | O157                       | ins                     | 3479106                 | 1101          | hypothetical protein                 |
| 156                      | Sakai                      | ins                     | 3480207                 | 4042          | Sp17 part 1                          |
| 157                      | CB9615                     | ins                     | 3261633                 | 30449         | Ep14 part 1                          |
| 158                      | EDL933                     | ins                     | 3550056                 | 1515          | IS1203                               |
| 159                      | O157                       | ins                     | 3486116                 | 5157          | CP-933Y and Sp17 part 2              |
| 160                      | CB9615                     | ins                     | 3293949                 | 35074         | Ep14 part 2                          |
| 161                      | Sakai/EDL933               | indel                   | 3559164                 | 24            | hypothetical protein                 |
| 162                      | Sakai/EDL933               | indel                   | 3491860                 | 24            | hypothetical protein                 |
| 163                      | O157                       | del                     | 3557253                 | 204           | norV                                 |
| 164                      | CB9615                     | del                     | 3436264                 | 94            | intergenic                           |
| 165                      | CB9615                     | ins                     | 3436265                 | 94            | intergenic                           |
| 166                      | CB9615                     | ins                     | 3462172                 | 122           | intergenic                           |
| 167                      | O157                       | ins                     | 3715004                 | 14073         | type III secretion apparatus         |
| 168                      | O157                       | ins                     | 3839916                 | 91            | intergenic                           |
| 169                      | O157                       | ins                     | 3869332                 | 3420          | SpLE3-IS629                          |
| 170                      | O157                       | del                     | 3872751                 | 8430          | EpLE2-lifA                           |
| 171                      | O157                       | ins                     | 3875152                 | 340           | SpLE3-IS3                            |
| 172                      | O157                       | del                     | 3875491                 | 61164         | T2SS and glc operon                  |
| 173                      | EDL933                     | del                     | 4038200                 | 100           | intergenic                           |
| 174                      | CB9615                     | del                     | 3899115                 | 113           | rnpB                                 |
| 175                      | O157                       | ins                     | 4033206                 | 1311          | IS629                                |
| 176                      | O157                       | del                     | 4034516                 | 353           | yraK                                 |
| 177                      | O157                       | del                     | 4103490                 | 78            | yhcG                                 |
| 178                      | O157                       | ins                     | 4151853                 | 53            | acrF                                 |
| 179                      | CB9615                     | del                     | 4121921                 | 109           | yrfAB                                |
| 180                      | O157                       | ins                     | 4293021                 | 29            | DNA helicase                         |
| 181                      | CB9615                     | ins                     | 4397185                 | 1093          | rhsA                                 |

| <b>Indel<sup>a</sup></b> | <b>Lineage<sup>b</sup></b> | <b>Type<sup>c</sup></b> | <b>Site<sup>d</sup></b> | <b>Length</b> | <b>Name or range</b> |
|--------------------------|----------------------------|-------------------------|-------------------------|---------------|----------------------|
| 182                      | EDL933                     | ins                     | 4575829                 | 1492          | rhsA                 |
| 183                      | Sakai                      | del                     | 4508599                 | 261           | yibJ                 |
| 184                      | O157                       | ins                     | 4585988                 | 2450          | SpLE4-ISEc8          |
| 185                      | O157                       | del                     | 4589334                 | 31            | espF                 |
| 186                      | O55/O157                   | indel                   | 4700552                 | 21            | lpfD                 |
| 187                      | CB9615                     | del                     | 4622584                 | 39            | intergenic           |
| 188                      | O157                       | del                     | 4735105                 | 42            | intergenic           |
| 189                      | Sakai                      | ins                     | 4776204                 | 225           | tRNA                 |
| 190                      | CB9615                     | del                     | 4718739                 | 46            | intergenic           |
| 191                      | CB9615                     | ins                     | 4718740                 | 43            | intergenic           |
| 192                      | CB9615                     | ins                     | 4781953                 | 368           | intergenic           |
| 193                      | Sakai                      | ins                     | 5040843                 | 38759         | Sp18                 |
| 194                      | O157                       | ins                     | 5180729                 | 100           | intergenic           |
| 195                      | CB9615                     | del                     | 5077101                 | 356           | yjeJ                 |
| 196                      | CB9615                     | ins                     | 5180103                 | 90            | yjgL                 |
| 197                      | O157                       | ins                     | 5347085                 | 10236         | SpLE5                |
| 198                      | O157                       | ins                     | 5424452                 | 48            | hypothetical protein |
| 199                      | CB9615                     | ins                     | 5263174                 | 54            | hypothetical protein |
| 200                      | CB9615                     | del                     | 5271158                 | 25            | hypothetical protein |
| 201                      | O157                       | del                     | 5464526                 | 236           | intergenic           |
| 202                      | CB9615                     | ins                     | 5306033                 | 49392         | Ep15                 |

<sup>a</sup> The extent of the indel events is shown in table S2

<sup>b</sup> O55/O157: Indel allocated to the O55/O157 divergence; Sakai/EDL933: Indel allocated to the divergence between Sakai and EDL933

<sup>c</sup> ins, insertion; del, deletion; indel: deletion or insertion

<sup>d</sup> For indels the base indicated is the base before the insertion or deletion.
