# Supplementary material for: Derivation of Escherichia coli O157:H7 from Its O55:H7 Precursor
Source: PubMed Central journal article supplement (PMC2806823; doi:10.1371/journal.pone.0008700), 2010-01-14
Supplement: pone.0008700.s012.pdf [file pone.0008700.s012.pdf]

| Locus_tag <sup>a</sup> |         |        | Gene | Product                                              |
|------------------------|---------|--------|------|------------------------------------------------------|
| CB9615                 | Sakai   | EDL933 |      |                                                      |
| G2583_0001             | ECs0001 | Z0001  | thrL | thr operon leader peptide                            |
| G2583_0002             | ECs0002 | Z0002  | thrA | Aspartokinase I, homoserine dehydrogenase I          |
| G2583_0003             | ECs0003 | Z0003  | thrB | Homoserine kinase                                    |
| G2583_0004             | ECs0004 | Z0004  | thrC | Threonine synthase                                   |
| G2583_0005             | ECs0005 | Z0005  | yaaX | conserved hypothetical protein                       |
| G2583_0006             | ECs0006 | Z0006  | yaaA | UPF0246 protein yaaA                                 |
| G2583_0007             | ECs0007 | Z0007  | yaaJ | inner membrane transport protein                     |
| G2583_0008             | ECs0008 | Z0008  | talB | Transaldolase 1                                      |
| G2583_0009             | ECs0009 | Z0009  | mog  | Molybdopterin biosynthesis mog protein               |
| G2583_0010             | ECs0010 | Z0010  | yaaH | membrane protein, GPR1/FUN34/yaaH family             |
| G2583_0011             | ECs0012 | Z0011  | yaaW | hypothetical protein                                 |
| G2583_0012             | ECs0011 | Z0012  | htgA | Positive regulator for sigma 32 heat shock promoters |
| G2583_0013             | ECs0013 | Z0013  | yaal | UPF0412 protein yaal precursor                       |
| G2583_0014             | ECs0014 | Z0014  | dnaK | Chaperone protein dnaK                               |
| G2583_0015             | ECs0015 | Z0015  | dnaJ | Chaperone protein DnaJ                               |
| G2583_0016             | ECs0016 | Z0016  | mokC | Gef protein                                          |
| G2583_0017             | ECs0017 | Z0018  | nhaA | Sodium/proton antiporter nhaA                        |
| G2583_0018             | ECs0018 | Z0019  | nhaR | DNA-binding transcriptional activator                |
| G2583_0019             | ECs0019 | Z0020  | -    | hypothetical protein                                 |
| G2583_0019             | ECs0020 | Z0020  | -    | hypothetical protein                                 |
| G2583_0019             | ECs0021 | Z0021  | -    | hypothetical protein                                 |
| G2583_0020             | ECs0022 | Z0022  | yehB | Putative usher protein                               |
| G2583_0021             | ECs0023 | Z0023  | yehC | Gram-negative pilus assembly chaperone               |
| G2583_0022             | ECs0024 | Z0024  | stcA | Putative type-1 fimbrial protein                     |
| G2583_0023             | ECs0025 | Z0025  | -    | hypothetical protein                                 |
| G2583_0024             | ECs0026 | Z0027  | rpsT | 30S ribosomal protein S20                            |
| G2583_0025             | ECs0027 | Z0028  | yaaY | hypothetical protein                                 |
| G2583_0026             | ECs0028 | Z0029  | ribF | Riboflavin biosynthesis protein ribF                 |
| G2583_0027             | ECs0029 | Z0030  | ileS | Isoleucyl-tRNA synthetase                            |
| G2583_0028             | ECs0030 | Z0031  | lspA | Lipoprotein signal peptidase                         |
| G2583_0029             | ECs0031 | Z0033  | fkpB | FKBP-type 16 kDa peptidyl-prolyl cis-trans isomerase |
| G2583_0030             | ECs0032 | Z0034  | ispH | 4-hydroxy-3-methylbut-2-enyl diphosphate reductase   |
| G2583_0031             | ECs0033 | Z0035  | rihC | Non-specific ribonucleoside hydrolase rihC           |
| G2583_0032             | ECs0034 | Z0036  | dapB | Dihydrodipicolinate reductase                        |
| G2583_0033             | ECs0035 | Z0037  | carA | Carbamoylphosphate synthase small subunit            |
| G2583_0034             | ECs0036 | Z0038  | carB | Carbamoyl-phosphate synthase large chain             |
| G2583_0035             |         | Z0039  | -    | hypothetical protein                                 |
| G2583_0036             | ECs0037 | Z0040  | caiF | DNA-binding transcriptional activator CaiF           |
| G2583_0037             | ECs0038 | Z0041  | caiE | Carnitine operon protein caiE                        |
| G2583_0038             | ECs0039 | Z0042  | caiD | Crotonobetainyl CoA hydratase                        |
| G2583_0039             | ECs0040 | Z0043  | caiC | Putative crotonobetaine/carnitine-CoA ligase         |
| G2583_0040             | ECs0041 | Z0044  | caiB | Crotonobetainyl-CoA:carnitine CoA-transferase        |
| G2583_0041             | ECs0042 | Z0045  | caiA | Crotonobetainyl-CoA dehydrogenase                    |
| G2583_0042             | ECs0043 | Z0046  | caiT | L-carnitine/gamma-butyrobetaine antiporter           |

| Locus_tag <sup>a</sup> |         |        | Gene | Product                                                                                          |
|------------------------|---------|--------|------|--------------------------------------------------------------------------------------------------|
| CB9615                 | Sakai   | EDL933 |      |                                                                                                  |
| G2583_0043             | ECs0044 | Z0047  | fixA | conserved hypothetical protein                                                                   |
| G2583_0044             | ECs0045 | Z0048  | fixB | hypothetical protein                                                                             |
| G2583_0045             | ECs0046 | Z0049  | fixC | PAPS (adenosine 3'-phosphate 5'-phosphosulfate) 3'(2'),5'-bisphosphate nucleotidase              |
| G2583_0046             | ECs0047 | Z0050  | fixX | Ferredoxin-like protein fixX                                                                     |
| G2583_0047             | ECs0048 | Z0051  | yaaU | Major facilitator family transporter                                                             |
| G2583_0048             | ECs0049 | Z0052  | kefF | Glutathione-regulated potassium-efflux system ancillary protein kefF                             |
| G2583_0049             | ECs0050 | Z0053  | kefC | Glutathione-regulated potassium-efflux system protein kefC (K+)/H(+) antiporter)                 |
| G2583_0050             | ECs0051 | Z0055  | folA | Dihydrofolate reductase                                                                          |
| G2583_0051             | ECs0052 | Z0056  | -    | putative antitoxin of gyrase inhibiting toxin-antitoxin system                                   |
| G2583_0052             | ECs0053 | Z0057  | -    | CcdB protein                                                                                     |
| G2583_0053             | ECs0054 | Z0058  | apaH | Bis(5'-nucleosyl)-tetrphosphatase, symmetrical                                                   |
| G2583_0054             | ECs0055 | Z0059  | apaG | ApaG                                                                                             |
| G2583_0055             | ECs0056 | Z0060  | ksgA | Dimethyladenosine transferase (S-adenosylmethionine-6-N', N'-adenosyl(rRNA) dimethyltransferase) |
| G2583_0056             | ECs0057 | Z0061  | pdxA | 4-hydroxythreonine-4-phosphate dehydrogenase                                                     |
| G2583_0057             | ECs0058 | Z0062  | surA | Chaperone surA precursor                                                                         |
| G2583_0058             | ECs0059 | Z0063  | imp  | LPS-assembly protein precursor                                                                   |
| G2583_0059             | ECs0060 | Z0064  | djlA | putative oxidoreductase Fe-S binding subunit                                                     |
| G2583_0060             | ECs0061 | Z0065  | yabP | hypothetical protein                                                                             |
| G2583_0061             | ECs0062 | Z0066  | rluA | Ribosomal large subunit pseudouridine synthase A                                                 |
| G2583_0062             | ECs0063 | Z0067  | hepA | RNA polymerase-associated protein rapA                                                           |
| G2583_0063             | ECs0064 | Z0068  | polB | DNA polymerase II                                                                                |
| G2583_0064             | ECs0065 | Z0069  | araD | L-ribulose-5-phosphate 4-epimerase                                                               |
| G2583_0065             | ECs0066 | Z0070  | araA | L-arabinose isomerase                                                                            |
| G2583_0066             | ECs0067 | Z0072  | araB | Ribulokinase                                                                                     |
| G2583_0067             | ECs0068 | Z0073  | araC | arabinose operon regulatory protein                                                              |
| G2583_0068             | ECs0069 | Z0074  | yabl | hypothetical protein                                                                             |
| G2583_0069             | ECs0070 | Z0075  | thiQ | Thiamine import ATP-binding protein thiQ                                                         |
| G2583_0070             | ECs0071 | Z0076  | thiP | Thiamine/thiamine pyrophosphate ABC transporter, permease protein                                |
| G2583_0071             | ECs0072 | Z0077  | tbpA | Thiamin/thiamin pyrophosphate ABC transporter, periplasmic thiamin/thiamin pyrophosphate-binding |
| G2583_0072             | ECs0073 | Z0078  | -    | hypothetical protein                                                                             |
| G2583_0073             | ECs0074 | Z0079  | sgrR | putative transport protein                                                                       |
| G2583_0074             |         |        | -    | ncRNA                                                                                            |
| G2583_0075             | ECs0075 | Z0080  | leuD | 3-isopropylmalate dehydratase small subunit                                                      |
| G2583_0076             | ECs0076 | Z0081  | leuC | 3-isopropylmalate dehydratase large subunit                                                      |
| G2583_0077             | ECs0077 | Z0082  | leuB | 3-isopropylmalate dehydrogenase                                                                  |
| G2583_0078             | ECs0078 | Z0083  | leuA | 2-isopropylmalate synthase                                                                       |
| G2583_0079             | ECs0079 | Z0084  | leuL | leader; Amino acid biosynthesis: Leucine                                                         |

| Locus_tag <sup>a</sup> |         |        | Gene | Product                                                                                                                     |
|------------------------|---------|--------|------|-----------------------------------------------------------------------------------------------------------------------------|
| CB9615                 | Sakai   | EDL933 |      |                                                                                                                             |
| G2583_0080             | ECs0080 | Z0086  | leuO | leucine transcriptional activator                                                                                           |
| G2583_0081             | ECs0081 | Z0087  | ilvI | Acetolactate synthase                                                                                                       |
| G2583_0082             | ECs0082 | Z0088  | ilvH | Acetolactate synthase III, valine sensitive, small subunit                                                                  |
| G2583_0083             | ECs0083 | Z0089  | fruL | fruR leader peptide                                                                                                         |
| G2583_0084             | ECs0084 | Z0090  | fruR | Fructose repressor                                                                                                          |
| G2583_0085             | ECs0085 | Z0091  | mraZ | hypothetical protein                                                                                                        |
| G2583_0086             | ECs0086 | Z0092  | mraW | S-adenosyl-L-methionine-dependent methyltransferase<br>mraW                                                                 |
| G2583_0087             | ECs0087 | Z0093  | ftsL | Cell division protein ftsL                                                                                                  |
| G2583_0088             | ECs0088 | Z0094  | ftsI | Peptidoglycan synthetase ftsI precursor                                                                                     |
| G2583_0089             | ECs0089 | Z0095  | murE | UDP-N-acetylmuramoyl-L-alanyl-D-glutamate--2, 6-<br>diaminopimelate ligase                                                  |
| G2583_0090             | ECs0090 | Z0096  | murF | UDP-N-acetylmuramoyl-tripeptide--D-alanyl-D-alanine<br>ligase                                                               |
| G2583_0091             | ECs0091 | Z0097  | mraY | Phospho-N-acetylmuramoyl-pentapeptide-transferase                                                                           |
| G2583_0092             | ECs0092 | Z0098  | murD | UDP-N-acetylmuramoylalanine--D-glutamate ligase                                                                             |
| G2583_0093             | ECs0093 | Z0099  | ftsW | Cell division protein ftsW                                                                                                  |
| G2583_0094             | ECs0094 | Z0100  | murG | UDP-N-acetylglucosamine--N-acetylmuramyl-<br>(pentapeptide) pyrophosphoryl-undecaprenol N-<br>acetylglucosamine transferase |
| G2583_0095             | ECs0095 | Z0101  | murC | UDP-N-acetylmuramate--L-alanine ligase                                                                                      |
| G2583_0096             | ECs0096 | Z0102  | ddlB | D-alanine--D-alanine ligase B                                                                                               |
| G2583_0097             | ECs0097 | Z0103  | ftsQ | Cell division protein FtsQ                                                                                                  |
| G2583_0098             | ECs0098 | Z0104  | ftsA | Cell division protein ftsA                                                                                                  |
| G2583_0099             | ECs0099 | Z0105  | ftsZ | Cell division protein ftsZ                                                                                                  |
| G2583_0100             | ECs0100 | Z0106  | lpxC | UDP-3-O-[3-hydroxymyristoyl] N-acetylglucosamine<br>deacetylase                                                             |
| G2583_0101             | ECs0101 | Z0107  | secM | Secretion monitor protein                                                                                                   |
| G2583_0102             | ECs0102 | Z0108  | secA | preprotein translocase subunit SecA                                                                                         |
| G2583_0103             | ECs0103 | Z0109  | mutT | 7,8-dihydro-8-oxoguanine-triphosphatase                                                                                     |
| G2583_0104             | ECs0104 | Z0110  | -    | hypothetical protein                                                                                                        |
| G2583_0105             | ECs0105 | Z0111  | yacG | Uncharacterized protein conserved in bacteria                                                                               |
| G2583_0106             | ECs0106 | Z0112  | yacF | UPF0289 protein yacF                                                                                                        |
| G2583_0107             | ECs0107 | Z0113  | coaE | Dephospho-CoA kinase                                                                                                        |
| G2583_0108             | ECs0108 | Z0114  | guaC | GMP reductase                                                                                                               |
| G2583_0109             | ECs0109 | Z0115  | -    | hypothetical protein                                                                                                        |
| G2583_0110             | ECs0110 | Z0116  | hofC | Type IV pilus assembly protein PilC                                                                                         |
| G2583_0111             | ECs0111 | Z0117  | hofB | GspE family protein HofB                                                                                                    |
| G2583_0112             | ECs0112 | Z0118  | ppdD | Prelipin peptidase dependent protein                                                                                        |
| G2583_0113             | ECs0113 | Z0119  | nadC | Nicotinate-nucleotide pyrophosphorylase                                                                                     |
| G2583_0114             | ECs0114 | Z0120  | ampD | N-acetylmuramoyl-L-alanine amidase                                                                                          |
| G2583_0115             | ECs0115 | Z0121  | ampE | regulatory protein AmpE                                                                                                     |
| G2583_0116             | ECs0116 | Z0122  | aroP | Aromatic amino acid transport protein                                                                                       |
| G2583_0117             | ECs0117 | Z0123  | pdhR | transcriptional regulator, GntR family                                                                                      |

| Locus_tag <sup>a</sup> |         |        | Gene | Product                                                                                                           |
|------------------------|---------|--------|------|-------------------------------------------------------------------------------------------------------------------|
| CB9615                 | Sakai   | EDL933 |      |                                                                                                                   |
| G2583_0118             | ECs0118 | Z0124  | aceE | Pyruvate dehydrogenase E1 component                                                                               |
| G2583_0119             | ECs0119 | Z0125  | aceF | Dihydrolipoyllysine-residue acetyltransferase                                                                     |
| G2583_0120             | ECs0120 | Z0126  | lpd  | Pyruvate/2-oxoglutarate dehydrogenase complex, dihydrolipoamide dehydrogenase (E3) component, and related enzymes |
| G2583_0121             | ECs0121 | Z0127  | yacH | hypothetical protein                                                                                              |
| G2583_0122             | ECs0122 | Z0128  | acnB | Aconitate hydratase 2                                                                                             |
| G2583_0123             | ECs0123 | Z0129  | yacL | hypothetical protein                                                                                              |
| G2583_0124             | ECs0124 | Z0130  | speD | S-adenosylmethionine decarboxylase proenzyme                                                                      |
| G2583_0125             | ECs0125 | Z0131  | speE | Spermidine synthase                                                                                               |
| G2583_0126             | ECs0126 | Z0132  | yacC | hypothetical protein                                                                                              |
| G2583_0127             | ECs0127 | Z0133  | cueO | Copper oxidase CueO                                                                                               |
| G2583_0128             | ECs0128 | Z0134  | gcd  | Quinoprotein glucose dehydrogenase                                                                                |
| G2583_0129             | ECs0129 | Z0136  | hpt  | Hypoxanthine phosphoribosyltransferase                                                                            |
| G2583_0130             | ECs0130 | Z0137  | can  | Carbonic anhydrase                                                                                                |
| G2583_0131             | ECs0131 | Z0138  | yadG | ABC transporter, ATP-binding protein                                                                              |
| G2583_0132             | ECs0132 | Z0139  | yadH | hypothetical protein                                                                                              |
| G2583_0133             | ECs0133 | Z0140  | yadI | PTS system IIA component domain protein                                                                           |
| G2583_0134             | ECs0134 | Z0141  | yadE | Polysaccharide deacetylase domain protein                                                                         |
| G2583_0135             | ECs0135 | Z0142  | panD | Aspartate 1-decarboxylase precursor                                                                               |
| G2583_0136             | ECs0136 | Z0143  | yadD | hypothetical protein                                                                                              |
| G2583_0137             | ECs0137 | Z0144  | panC | Pantothenate synthetase                                                                                           |
| G2583_0138             | ECs0138 | Z0145  | panB | 3-methyl-2-oxobutanoate hydroxymethyltransferase                                                                  |
| G2583_0139             | ECs0139 | Z0146  | yadC | Putative fimbrial protein                                                                                         |
| G2583_0140             | ECs0140 | Z0147  | yadK | Putative fimbrial protein                                                                                         |
| G2583_0141             | ECs0141 | Z0148  | yadL | Putative fimbrial protein                                                                                         |
| G2583_0142             | ECs0142 | Z0149  | yadM | Putative fimbrial protein                                                                                         |
| G2583_0143             | ECs0143 | Z0150  | htrE | Probable outer membrane porin protein involved in fimbrial assembly                                               |
| G2583_0144             | ECs0144 | Z0151  | ecpD | Gram-negative pili assembly chaperone                                                                             |
| G2583_0145             | ECs0145 | Z0152  | yadN | Putative fimbrial protein                                                                                         |
| G2583_0146             | ECs0146 | Z0153  | folK | 2-amino-4-hydroxy-6-hydroxymethyldihydropteridine pyrophosphokinase                                               |
| G2583_0147             | ECs0147 | Z0154  | pcnB | Poly(A) polymerase                                                                                                |
| G2583_0148             | ECs0148 | Z0155  | yadB | Glutamyl-Q tRNA(Asp) synthetase                                                                                   |
| G2583_0149             | ECs0149 | Z0156  | dksA | RNA polymerase-binding protein DksA                                                                               |
| G2583_0150             | ECs0150 | Z0157  | sfsA | Sugar fermentation stimulation protein A                                                                          |
| G2583_0151             | ECs0151 | Z0158  | ligT | hypothetical protein                                                                                              |
| G2583_0152             | ECs0152 | Z0159  | hrpB | ATP-dependent helicase HrpB                                                                                       |
| G2583_0153             | ECs0153 | Z0160  | mrcB | Penicillin-binding protein 1B                                                                                     |
| G2583_0154             | ECs0154 | Z0161  | fhuA | Ferrichrome-iron receptor                                                                                         |
| G2583_0155             | ECs0155 | Z0162  | fhuC | Ferrichrome transport ATP-binding protein FhuC                                                                    |
| G2583_0156             | ECs0156 | Z0163  | fhuD | Ferrichrome-binding periplasmic protein FhuD                                                                      |
| G2583_0157             | ECs0157 | Z0164  | fhuB | Ferrichrome ABC transporter, permease protein FhuB                                                                |

| Locus_tag <sup>a</sup> |         |        | Gene | Product                                                               |
|------------------------|---------|--------|------|-----------------------------------------------------------------------|
| CB9615                 | Sakai   | EDL933 |      |                                                                       |
| G2583_0158             | ECs0158 | Z0165  | hemL | Glutamate-1-semialdehyde 2,1-aminomutase                              |
| G2583_0159             | ECs0159 | Z0166  | clcA | H(+)/Cl(-) exchange transporter clcA                                  |
| G2583_0160             | ECs0160 | Z0167  | yadR | Iron-sulfur cluster insertion protein erpA                            |
| G2583_0161             | ECs0161 | Z0168  | yadS | UPF0126 inner membrane protein yadS                                   |
| G2583_0162             | ECs0162 | Z0169  | btuF | Vitamin B12-binding protein precursor                                 |
| G2583_0163             | ECs0163 | Z0170  | mtn  | MTA/SAH nucleosidase                                                  |
| G2583_0164             | ECs0164 | Z0171  | dgt  | Deoxyguanosinetriphosphate triphosphohydrolase                        |
| G2583_0165             | ECs0165 | Z0173  | degP | Protease do precursor                                                 |
| G2583_0166             | ECs0166 | Z0174  | cdaR | hypothetical protein                                                  |
| G2583_0167             | ECs0167 | Z0175  | yaeH | UPF0325 protein yaeH                                                  |
| G2583_0168             | ECs0168 | Z0176  | dapD | 2,3,4,5-tetrahydropyridine-2,6-dicarboxylate N-succinyltransferase    |
| G2583_0169             | ECs0169 | Z0177  | glnD | [Protein-P <sub>II</sub> ] uridylyltransferase                        |
| G2583_0170             | ECs0170 | Z0178  | map  | Methionine aminopeptidase                                             |
| G2583_0171             |         |        | -    | ncRNA                                                                 |
| G2583_0172             | ECs0171 | Z0180  | rpsB | 30S ribosomal protein S2                                              |
| G2583_0173             | ECs0172 | Z0181  | tsf  | Elongation factor Ts                                                  |
| G2583_0174             | ECs0173 | Z0182  | pyrH | UMP kinase                                                            |
| G2583_0175             | ECs0174 | Z0183  | frr  | Ribosome recycling factor                                             |
| G2583_0176             | ECs0175 | Z0184  | dxr  | Putative ATP-binding component of a transport system                  |
| G2583_0177             | ECs0176 | Z0185  | ispU | Undecaprenyl pyrophosphate synthetase                                 |
| G2583_0178             | ECs0177 | Z0186  | cdsA | Phosphatidate cytidylyltransferase                                    |
| G2583_0179             | ECs0178 | Z0187  | rseP | Regulator of sigma E protease                                         |
| G2583_0180             | ECs0179 | Z0188  | yaeT | Outer membrane protein assembly factor yaeT                           |
| G2583_0181             | ECs0180 | Z0190  | skp  | Chaperone protein skp precursor                                       |
| G2583_0182             | ECs0181 | Z0191  | lpxD | UDP-3-O-[3-hydroxymyristoyl] glucosamine N-acyltransferase            |
| G2583_0183             | ECs0182 | Z0192  | fabZ | (3R)-hydroxymyristoyl-(acyl carrier protein) dehydratase              |
| G2583_0184             | ECs0183 | Z0193  | lpxA | Acyl-[acyl-carrier-protein]-UDP-N-acetylglucosamine O-acyltransferase |
| G2583_0185             | ECs0184 | Z0194  | lpxB | Lipid-A-disaccharide synthase                                         |
| G2583_0186             | ECs0185 | Z0195  | rnhB | Ribonuclease HIII                                                     |
| G2583_0187             | ECs0186 | Z0196  | dnaE | DNA polymerase III subunit alpha                                      |
| G2583_0188             | ECs0187 | Z0197  | accA | Acetyl-coenzyme A carboxylase carboxyl transferase subunit alpha      |
| G2583_0189             | ECs0188 | Z0198  | ldcC | Lysine decarboxylase, constitutive                                    |
| G2583_0190             | ECs0189 | Z0199  | yaeR | Putative lactoylglutathione lyase                                     |
| G2583_0191             | ECs0190 | Z0200  | tilS | tRNA(Ile)-lysidine synthase                                           |
| G2583_0192             | ECs0191 | Z0201  | rof  | Rof protein                                                           |
| G2583_0193             |         |        | yaeP | hypothetical protein                                                  |
| G2583_0194             | ECs0192 | Z0202  | yaeQ | hypothetical protein                                                  |
| G2583_0195             | ECs0193 | Z0203  | yaeJ | hypothetical protein                                                  |
| G2583_0196             | ECs0194 | Z0204  | nlpE | Copper homeostasis protein CutF                                       |
| G2583_0197             | ECs0195 | Z0205  | yaeF | hypothetical protein                                                  |

| Locus_tag <sup>a</sup> |         |        | Gene | Product                                                  |
|------------------------|---------|--------|------|----------------------------------------------------------|
| CB9615                 | Sakai   | EDL933 |      |                                                          |
| G2583_0198             | ECs0196 | Z0206  | proS | Prolyl-tRNA synthetase                                   |
| G2583_0199             | ECs0197 | Z0207  | yaeB | hypothetical protein                                     |
| G2583_0200             | ECs0198 | Z0208  | rceF | Regulator in colanic acid synthesis                      |
| G2583_0201             | ECs0199 | Z0209  | metQ | D-methionine-binding lipoprotein metQ precursor          |
| G2583_0202             | ECs0200 | Z0210  | metI | D-methionine transport system permease protein metI      |
| G2583_0203             | ECs0201 | Z0211  | metN | Methionine import ATP-binding protein metN               |
| G2583_0204             | ECs0202 | Z0212  | gmhB | D,D-heptose 1,7-bisphosphate phosphatase                 |
| G2583_0205             | rrsH    | RNA001 | rrs  | 16S ribosomal RNA                                        |
| G2583_0206             | ileV    | RNA002 | ileV | Ile tRNA                                                 |
| G2583_0207             | alaV    | RNA003 | alaV | Ala tRNA                                                 |
| G2583_0208             | rrlH    | RNA004 | rrl  | 23S ribosomal RNA                                        |
| G2583_0209             | rrfH    | RNA005 | rrf  | 5S ribosomal RNA                                         |
| G2583_0210             | aspU    | RNA006 | aspU | Asp tRNA                                                 |
| G2583_0211             | ECs0203 | Z0229  | dkgB | 2,5-diketo-D-gluconic acid reductase B                   |
| G2583_0212             | ECs0204 | Z0230  | yafC | putative transcriptional regulator LYSR-type             |
| G2583_0213             | ECs0205 | Z0232  | yafD | hypothetical protein                                     |
| G2583_0214             | ECs0206 | Z0233  | yafE | Methyltransferase, UbiE/COQ5 family                      |
| G2583_0215             | ECs0207 | Z0235  | mltD | Membrane-bound lytic murein transglycosylase D precursor |
| G2583_0216             | ECs0208 | Z0236  | gloB | Hydroxyacylglutathione hydrolase                         |
| G2583_0217             | ECs0209 | Z0237  | yafS | hypothetical protein                                     |
| G2583_0218             | ECs0210 | Z0239  | rnhA | RNase HI                                                 |
| G2583_0219             | ECs0211 | Z0241  | dnaQ | DNA polymerase III, epsilon subunit                      |
| G2583_0220             | aspV    | RNA007 | aspV | Asp tRNA                                                 |
| G2583_0221             |         | Z0243  | yafT | hypothetical protein                                     |
| G2583_0222             | ECs0212 | Z0244  | -    | hypothetical protein                                     |
| G2583_0223             | ECs0213 | Z0245  | -    | hypothetical protein                                     |
| G2583_0224             | ECs0214 | Z0246  | -    | hypothetical protein                                     |
| G2583_0224             | ECs0215 | Z0247  | -    | hypothetical protein                                     |
| G2583_0225             | ECs0216 | Z0248  | yhhZ | hypothetical protein                                     |
| G2583_0226             | ECs0217 | Z0249  | ImpA | ImpA domain protein                                      |
| G2583_0227             | ECs0218 | Z0250  | -    | putative macrophage toxin                                |
|                        | ECs0219 |        | -    | hypothetical protein                                     |
| G2583_0228             | ECs0220 | Z0251  | ImpA | ImpA domain protein                                      |
| G2583_0228             | ECs0221 | Z0252  | ImpA | ImpA domain protein                                      |
| G2583_0229             | ECs0222 | Z0253  | -    | Type VI secretion-associated protein, VC_A0118 family    |
| G2583_0230             | ECs0223 | Z0254  | clpB | type VI secretion ATPase, ClpV1 family                   |
| G2583_0231             | ECs0224 | Z0255  | -    | hypothetical protein                                     |
| G2583_0232             | ECs0225 | Z0256  | -    | Uncharacterized protein conserved in bacteria            |
| G2583_0233             | ECs0226 | Z0257  | -    | Type VI secretion lipoprotein, VC_A0113 family           |
| G2583_0234             | ECs0227 | Z0258  | -    | hypothetical protein                                     |
| G2583_0235             | ECs0228 | Z0259  | -    | hypothetical protein                                     |
| G2583_0236             | ECs0229 | Z0260  | -    | hypothetical protein                                     |
| G2583_0237             | ECs0230 | Z0261  | -    | hypothetical protein                                     |

| Locus_tag <sup>a</sup> |         |         | Gene  | Product                                      |
|------------------------|---------|---------|-------|----------------------------------------------|
| CB9615                 | Sakai   | EDL933  |       |                                              |
| G2583_0238             | ECs0231 | Z0262   | -     | hypothetical protein                         |
| G2583_0239             | ECs0232 | Z0263   | -     | hypothetical protein                         |
| G2583_0240             | ECs0233 | Z0264   | -     | hypothetical protein                         |
| G2583_0241             |         | Z0265   | -     | hypothetical protein                         |
| G2583_0242             | ECs0234 | Z0266   | -     | Hcp                                          |
| G2583_0243             | ECs0235 |         | -     | hypothetical protein                         |
| G2583_0244             | ECs0236 | Z0267   | VgrG  | VgrG                                         |
| G2583_0245             | ECs0237 | Z0268   | rhsG1 | rhsG-1                                       |
| G2583_0246             | Indel-2 | Indel-2 | -     | Ankyrin repeat protein                       |
| G2583_0247             | ECs0237 | Z0268   | rhsG2 | RhsG-2                                       |
| G2583_0248             | ECs0238 | Z0269   | yibG  | hypothetical protein                         |
| G2583_0249             | ECs0239 |         | -     | hypothetical protein                         |
| G2583_0250             | ECs0240 |         | -     | Hypothetical membrane protein                |
| G2583_0251             | ECs0241 | Z0271   | yhhI  | ISEc3, transposase                           |
| G2583_0252             | ECs0242 | Z0272   | -     | unknown protein associated with Rhs element  |
| G2583_0253             | ECs0243 |         | ydcD  | hypothetical protein                         |
|                        |         | Z0273   | -     | hypothetical protein                         |
| G2583_0253             | ECs0244 | Z0274   | ydcD  | hypothetical protein                         |
| G2583_0254             | ECs0245 | Z0275   | yncl  | Putative transposase yncI                    |
| G2583_0255             | ECs0246 | Z0276   | yafV  | Hydrolase, carbon-nitrogen family            |
| G2583_0256             | ECs0247 | Z0277   | ivy   | Inhibitor of vertebrate lysozyme precursor   |
| G2583_0257             | ECs0248 | Z0278   | fadE  | Acyl-coenzyme A dehydrogenase                |
| G2583_0258             | ECs0249 | Z0280   | lpcA  | Phosphoheptose isomerase                     |
| G2583_0259             | ECs0250 | Z0281   | yafJ  | Glutamine amidotransferase, class II         |
| G2583_0260             | ECs0251 | Z0282   | yafK  | hypothetical protein                         |
| G2583_0261             | ECs0252 | Z0284   | yafQ  | Addiction module toxin, RelE/StbE family     |
| G2583_0262             | ECs0253 | Z0285   | dinJ  | Addiction module antitoxin, RelB/DinJ family |
| G2583_0263             | ECs0254 | Z0287   | yafL  | NlpC/P60 family protein                      |
| G2583_0264             | ECs0255 | Z0288   | yafM  | Putative transposase                         |
| G2583_0265             | ECs0257 | Z0290   | FhiA  | Type III secretion protein, FHIPEP family    |
| G2583_0266             | ECs0256 | Z0291   | mbhA  | Putative motility protein                    |
| G2583_0267             | ECs0258 | Z0292   | dinB  | DNA polymerase IV                            |
| G2583_0268             | ECs0259 | Z0293   | yafN  | Prevent-host-death family protein            |
| G2583_0269             | ECs0260 | Z0294   | yafO  | putative toxin YafO                          |
| G2583_0270             | ECs0261 | Z0295   | yafP  | Acetyltransferase, GNAT family               |
| G2583_0271             | ECs0262 | Z0296   | ykfJ  | hypothetical protein                         |
| G2583_0272             | ECs0263 | Z0297   | prfH  | Probable peptide chain release factor        |
| G2583_0273             | ECs0264 | Z0298   | pepD  | Aminoacyl-histidine dipeptidase              |
| G2583_0274             | ECs0265 | Z0299   | gpt   | Xanthine phosphoribosyltransferase           |
| G2583_0275             | ECs0266 | Z0300   | frsA  | Esterase frsA                                |
| G2583_0276             | ECs0267 | Z0301   | crl   | Sigma factor-binding protein crl             |
| G2583_0277             | ECs0268 | Z0302   | phoE  | Outer membrane protein (porin)               |
| G2583_0278             | ECs0269 | Z0303   | proB  | Glutamate 5-kinase                           |
| G2583_0279             | ECs0270 | Z0304   | proA  | Gamma-glutamyl phosphate reductase           |

| Locus_tag <sup>a</sup> |         |         | Gene | Product                                                                |
|------------------------|---------|---------|------|------------------------------------------------------------------------|
| CB9615                 | Sakai   | EDL933  |      |                                                                        |
| G2583_0280             | thrW    | RNA008  | thrW | Thr tRNA                                                               |
| Indel-5                | ECs0271 | Z0307   | intH | putative integrase                                                     |
| Indel-5                | ECs0272 |         | -    | putative transcription antitermination protein                         |
| Indel-5                | ECs0273 | Z0308   | -    | hypothetical protein                                                   |
| Indel-5                | ECs0274 | Z0309   | -    | repressor protein CI                                                   |
| Indel-5                | ECs0275 |         | -    | Cro repressor                                                          |
| Indel-5                | ECs0276 | Z0310   | -    | regulatory protein cII                                                 |
| Indel-5                | ECs0277 | Z0311   | -    | replication protein                                                    |
| Indel-5                | ECs0278 | Z0312   | -    | replication protein                                                    |
| Indel-5                | ECs0279 | Z0313   | -    | replication protein                                                    |
| Indel-5                | ECs0280 | Z0314   | -    | putative tail fiber protein                                            |
| Indel-6                | ECs0281 | Indel-6 | -    | hypothetical protein                                                   |
| Indel-6                | ECs0282 | Indel-6 | -    | hypothetical protein                                                   |
| Indel-6                | ECs0283 | Indel-6 | -    | putative tail fiber protein                                            |
| Indel-7                | Indel-7 | Z0315   | -    | unknown protein from prophage CP-933H                                  |
| Indel-7                | Indel-7 | Z0316   | -    | unknown protein from prophage CP-933H                                  |
| Indel-7                | Indel-7 | Z0317   | -    | putative tail fiber protein from prophage CP-933H                      |
| Indel-8                | ECs0284 | Z0318   | pinH | DNA-invertase                                                          |
| Indel-8                | ECs0285 | Z0319   | -    | hypothetical protein                                                   |
| Indel-8                | ECs0286 |         | -    | hypothetical protein                                                   |
| Indel-8                | ECs0287 | Z0321   | -    | putative transcription regulator                                       |
| Indel-8                | ECs0288 | Z0322   | -    | hypothetical protein                                                   |
| G2583_0281             |         |         | -    | Site-specific recombinase, phage integrase family                      |
| G2583_0282             | Indel-9 | Indel-9 | -    | hypothetical protein                                                   |
| G2583_0283             | Indel-9 | Indel-9 | eaA  | hypothetical protein                                                   |
| G2583_0284             | Indel-9 | Indel-9 | -    | ORF8                                                                   |
| G2583_0285             | Indel-9 | Indel-9 | -    | hypothetical C4-type zinc finger protein TraR-family                   |
| G2583_0286             | Indel-9 | Indel-9 | -    | hypothetical protein                                                   |
| G2583_0287             | Indel-9 | Indel-9 | -    | unknown protein encoded by prophage CP-933K                            |
| G2583_0288             | Indel-9 | Indel-9 | -    | hypothetical protein                                                   |
| G2583_0289             | Indel-9 | Indel-9 | -    | Exonuclease                                                            |
| G2583_0290             | Indel-9 | Indel-9 | bet  | Bet protein                                                            |
| G2583_0291             | Indel-9 | Indel-9 | gamW | Gam protein                                                            |
| G2583_0292             | Indel-9 | Indel-9 | CIII | antitermination protein                                                |
| G2583_0293             | Indel-9 | Indel-9 | ral  | Lambda ant-restriction protein                                         |
| G2583_0294             | Indel-9 | Indel-9 | -    | Superinfection exclusion protein B                                     |
| G2583_0295             | Indel-9 | Indel-9 | -    | Antitermination protein                                                |
| G2583_0296             | Indel-9 | Indel-9 | -    | Gene 38 protein                                                        |
| G2583_0297             | Indel-9 | Indel-9 | ymfK | SOS-response transcriptional repressors (RecA-mediated autopeptidases) |
| G2583_0298             | Indel-9 | Indel-9 | cro  | gene 40 protein                                                        |
| G2583_0299             | Indel-9 | Indel-9 | -    | Phage regulatory protein                                               |
| G2583_0300             | Indel-9 | Indel-9 | -    | Putative replication protein O of bacteriophage                        |
| G2583_0301             | Indel-9 | Indel-9 | -    | putative replication protein P of bacteriophage BP-933W                |



Table S10. The orthologue table of the O55 and O157 strains Page 9

| Locus_tag <sup>a</sup> |         |         | Gene | Product                                                       |
|------------------------|---------|---------|------|---------------------------------------------------------------|
| CB9615                 | Sakai   | EDL933  |      |                                                               |
| G2583_0302             | Indel-9 | Indel-9 | -    | Ren protein                                                   |
| G2583_0303             | Indel-9 | Indel-9 | ninB | Unknown protein encoded within prophage                       |
| G2583_0304             | Indel-9 | Indel-9 | -    | Putative DNA N-6-adenine-methyltransferase of bacteriophage   |
| G2583_0305             | Indel-9 | Indel-9 | ninE | NINE Protein                                                  |
| G2583_0306             | Indel-9 | Indel-9 | NinG | hypothetical protein                                          |
| G2583_0307             | Indel-9 | Indel-9 | -    | Serine/threonine-protein phosphatase 1                        |
| G2583_0308             | Indel-9 | Indel-9 | -    | putative antitermination protein                              |
| G2583_0309             | Indel-9 | Indel-9 | -    | conserved hypothetical protein                                |
| G2583_0310             | Indel-9 | Indel-9 | YjhS | YjhS                                                          |
| G2583_0311             | Indel-9 | Indel-9 | -    | hypothetical protein                                          |
| G2583_0312             | Indel-9 | Indel-9 | -    | Putative lysis protein S of prophage CP-933V                  |
| G2583_0313             | Indel-9 | Indel-9 | ybcS | Phage-related lysozyme (muraminidase)                         |
| G2583_0314             | Indel-9 | Indel-9 | -    | Putative Rz endopeptidase from lambdoid prophage DLP12        |
| G2583_0315             | Indel-9 | Indel-9 | -    | unknown protein encoded within prophage CP-933R               |
| G2583_0316             | Indel-9 | Indel-9 | -    | Putative transcriptional regulator                            |
| G2583_0317             | Indel-9 | Indel-9 | ynfO | unknown protein encoded within prophage CP-933R               |
| G2583_0318             | Indel-9 | Indel-9 | nohA | conserved hypothetical protein                                |
| G2583_0319             | Indel-9 | Indel-9 | -    | Prophage Qin DNA packaging protein NU1 homolog                |
| G2583_0320             | Indel-9 | Indel-9 | -    | Putative terminase large subunit of prophage CP-933O          |
| G2583_0321             | Indel-9 | Indel-9 | -    | Head-stabilizing protein                                      |
| G2583_0322             | Indel-9 | Indel-9 | -    | Putative capsid protein of prophage                           |
| G2583_0323             | Indel-9 | Indel-9 | -    | Head-tail preconnector protein GP5                            |
| G2583_0324             | Indel-9 | Indel-9 | -    | Head decoration protein                                       |
| G2583_0325             | Indel-9 | Indel-9 | -    | Major head protein                                            |
| G2583_0326             | Indel-9 | Indel-9 | -    | Uncharacterized 13.5 kDa protein in GP7-GP8 intergenic region |
| G2583_0327             | Indel-9 | Indel-9 | -    | Putative head-tail joining protein of prophage                |
| G2583_0328             | Indel-9 | Indel-9 | -    | Prophage minor tail protein Z                                 |
| G2583_0329             | Indel-9 | Indel-9 | -    | Minor tail protein U                                          |
| G2583_0330             | Indel-9 | Indel-9 | -    | Putative tail component of prophage CP-933X                   |
| G2583_0331             | Indel-9 | Indel-9 | -    | Putative tail component of prophage                           |
| G2583_0332             | Indel-9 | Indel-9 | -    | Minor tail protein T                                          |
| G2583_0333             | Indel-9 | Indel-9 | -    | Phage-related minor tail protein                              |
| G2583_0334             | Indel-9 | Indel-9 | -    | minor tail protein                                            |
| G2583_0335             | Indel-9 | Indel-9 | -    | Phage-related protein                                         |
| G2583_0336             | Indel-9 | Indel-9 | -    | Tail assembly protein                                         |
| G2583_0337             | Indel-9 | Indel-9 | -    | Tail assembly protein I                                       |
| G2583_0338             | Indel-9 | Indel-9 | -    | Phage-related protein, tail component                         |
| G2583_0339             | Indel-9 | Indel-9 | lomK | Enterobacterial Ail/Lom family protein                        |
| G2583_0340             | Indel-9 | Indel-9 | -    | Putative tail fiber protein                                   |
| G2583_0341             | Indel-9 | Indel-9 | nleG | hypothetical protein                                          |
| G2583_0342             | Indel-9 | Indel-9 | -    | PotB, trcA, ORF2, ORF3, ORF4 genes,                           |

Table S10. The orthologue table of the O55 and O157 strains Page 10

| Locus_tag <sup>a</sup> |         |         | Gene | Product                                                                    |
|------------------------|---------|---------|------|----------------------------------------------------------------------------|
| CB9615                 | Sakai   | EDL933  |      |                                                                            |
| G2583_0343             | Indel-9 | Indel-9 | -    | PotB, trcA, ORF2, ORF3, ORF4 genes,                                        |
| G2583_0344             | Indel-9 | Indel-9 | lpgB | Putative chaperone protein                                                 |
| G2583_0345             | Indel-9 | Indel-9 | -    | Tail fiber assembly protein                                                |
| G2583_0346             | Indel-9 | Indel-9 | intR | Putative integrase for prophage CP-933R                                    |
| G2583_0347             | Indel-9 | Indel-9 | -    | NleB                                                                       |
| G2583_0348             | Indel-9 | Indel-9 | -    | hypothetical protein                                                       |
| G2583_0349             | Indel-9 | Indel-9 | gogB | conserved hypothetical protein                                             |
| G2583_0350             | Indel-9 | Indel-9 | -    | conserved hypothetical protein                                             |
| G2583_0351             | ECs0289 | Z0324   | -    | Integrase protein for prophage CP-933I                                     |
| G2583_0352             | ECs0290 | Z0325   | -    | unknown protein encoded in prophage CP-933I                                |
| G2583_0353             | ECs0291 | Z0326   | -    | unknown protein encoded in prophage CP-933I                                |
| G2583_0354             | ECs0292 | Z0327   | -    | unknown protein encoded in prophage CP-933I                                |
| G2583_0355             | ECs0293 | Z0328   | -    | hypothetical protein                                                       |
| G2583_0356             | ECs0294 | Z0330   | -    | unknown protein encoded in prophage CP-933I                                |
| G2583_0357             | ECs0295 | Z0331   | -    | unknown protein encoded in prophage CP-933I                                |
| G2583_0358             | ECs0296 | Z0332   | ogrK | Putative activator encoded in prophage CP-933I                             |
| G2583_0359             | ECs0297 | Z0333   | psul | Putative polarity suppression protein encoded in CP-                       |
| G2583_0360             | ECs0298 | Z0334   | sidI | Putative capsid morphogenesis protein encoded in CP-933I                   |
| G2583_0361             |         | Z0335   | -    | unknown protein encoded in prophage CP-933I                                |
| G2583_0362             | ECs0299 | Z0336   | alpA | Phage DNA binding protein                                                  |
| G2583_0363             | ECs0300 | Z0337   | -    | putative CI repressor                                                      |
| G2583_0364             | ECs0301 |         | -    | hypothetical protein                                                       |
| G2583_0365             | ECs0302 | Z0338   | -    | unknown protein encoded in prophage CP-933I                                |
| G2583_0366             | ECs0303 | Z0339   | -    | Alpha replication protein of prophage CP-933I                              |
| G2583_0367             | ECs0304 | Z0340   | -    | unknown protein encoded in prophage CP-933I                                |
|                        |         | Z0341   | -    | unknown protein encoded in prophage CP-933I                                |
| G2583_0368             | ECs0305 | Z0342   | yagP | putative LysR-like transcriptional regulator                               |
| G2583_0369             | ECs0306 | Z0343   | -    | Clavaldehyde dehydrogenase                                                 |
| G2583_0370             | ECs0307 | Z0344   | -    | hypothetical protein                                                       |
|                        | ECs0308 |         | -    | hypothetical protein                                                       |
| G2583_0371             |         | Z0345   | -    | hypothetical protein                                                       |
| G2583_0372             | ECs0309 | Z0346   | -    | LysR substrate binding domain protein                                      |
| G2583_0373             | ECs0310 | Z0347   | -    | Hydrolase of the alpha/beta superfamily                                    |
| G2583_0374             | ECs0311 | Z0348   | -    | Purine ribonucleoside efflux pump NepI                                     |
|                        | ECs0312 |         | -    | hypothetical protein                                                       |
| G2583_0375             | ECs0313 | Z0349   | yagQ | Putative xanthine dehydrogenase accessory factor                           |
| G2583_0376             | ECs0314 | Z0350   | yagR | Putative xanthine dehydrogenase yagR molybdenum-binding subunit            |
| G2583_0377             | ECs0315 | Z0351   | yagS | FAD binding domain in molybdopterin dehydrogenase                          |
| G2583_0378             | ECs0316 | Z0352   | yagT | Putative xanthine dehydrogenase yagT iron-sulfur-binding subunit precursor |
| G2583_0379             | ECs0317 | Z0353   | yagU | Inner membrane protein yagU                                                |
| G2583_0380             | ECs0318 | Z0354   | ykgJ | putative ferredoxin                                                        |

Table S10. The orthologue table of the O55 and O157 strains Page 11

| Locus_tag <sup>a</sup> |         |        | Gene | Product                                           |
|------------------------|---------|--------|------|---------------------------------------------------|
| CB9615                 | Sakai   | EDL933 |      |                                                   |
| G2583_0381             | ECs0319 | Z0356  | yagV | hypothetical protein                              |
| G2583_0382             | ECs0320 | Z0357  | yagW | putative receptor                                 |
| G2583_0383             | ECs0321 | Z0358  | yagX | putative enzyme                                   |
| G2583_0384             | ECs0322 | Z0359  | matC | hypothetical protein                              |
| G2583_0385             | ECs0323 | Z0360  | matB | hypothetical protein                              |
| G2583_0386             | ECs0324 | Z0361  | matA | MatA                                              |
| G2583_0387             |         | Z0362  | -    | hypothetical protein                              |
|                        | ECs0325 |        | -    | hypothetical protein                              |
| G2583_0388             | ECs0326 | Z0363  | ykgL | hypothetical protein                              |
| G2583_0389             |         |        | ykgO | 50S ribosomal protein L36                         |
| G2583_0390             | ECs0327 | Z0364  | ykgM | Ribosomal protein L31                             |
| Indel-10               | ECs0328 | Z0365  | -    | hypothetical protein                              |
| Indel-10               | ECs0329 | Z0366  | -    | hypothetical protein                              |
| Indel-10               | ECs0330 | Z0367  | -    | hypothetical protein                              |
| G2583_0391             | ECs0331 | Z0369  | -    | Oxidoreductase, FAD/FMN-binding                   |
| G2583_0392             | ECs0332 | Z0370  | ycjY | hypothetical protein                              |
| G2583_0393             | ECs0333 | Z0371  | ycaN | Putative LysR-like transcriptional regulator      |
| G2583_0394             | ECs0334 | Z0372  | -    | hypothetical protein                              |
| G2583_0395             |         | Z0373  | -    | hypothetical protein                              |
| G2583_0396             | ECs0335 | Z0374  | -    | 2,5-diketo-D-gluconic acid reductase A            |
| G2583_0397             | ECs0336 | Z0375  | eaeH | Attaching and effacing protein homolog precursor  |
| G2583_0398             | ECs0337 | Z0376  | ykgA | Putative AraC-like transcriptional regulator      |
| G2583_0399             | ECs0338 | Z0377  | -    | Putative dehydrogenase                            |
| G2583_0400             | ECs0340 | Z0378  | ykgB | protein of unknown function DUF417                |
| G2583_0401             | ECs0339 | Z0379  | -    | hypothetical protein                              |
| G2583_0402             | ECs0341 | Z0380  | ykgI | hypothetical protein                              |
| G2583_0403             | ECs0342 | Z0381  | ykgC | Pyridine nucleotide-disulphide oxidoreductase     |
| G2583_0404             | ECs0343 | Z0382  | ykgD | Hypothetical transcriptional regulator ykgD       |
| G2583_0405             | ECs0344 | Z0384  | ykgE | Cysteine-rich domain protein                      |
| G2583_0406             | ECs0345 | Z0385  | ykgF | Iron-sulfur cluster binding protein               |
| G2583_0407             | ECs0346 | Z0386  | ykgG | hypothetical protein                              |
| G2583_0408             | ECs0347 | Z0387  | -    | hypothetical protein                              |
| G2583_0409             | ECs0348 | Z0388  | ykgH | hypothetical protein                              |
| G2583_0410             | ECs0349 | Z0389  | -    | Putative autotransporter                          |
| G2583_0410             | ECs0350 | Z0390  | -    | Putative autotransporter                          |
| G2583_0411             | ECs0351 | Z0391  | -    | hypothetical protein                              |
| G2583_0412             | ECs0352 | Z0392  | -    | hypothetical protein                              |
| G2583_0412             | ECs0353 |        | -    | hypothetical protein                              |
|                        |         | Z0393  | -    | hypothetical protein                              |
| G2583_0413             | ECs0354 | Z0394  | fimX | Site-specific recombinase, phage integrase family |
| G2583_0413             | ECs0355 | Z0395  | fimX | Site-specific recombinase, phage integrase family |
|                        | ECs0356 |        | -    | hypothetical protein                              |
| G2583_0414             |         | Z0397  | -    | hypothetical protein                              |
| G2583_0415             | ECs0357 | Z0398  | betA | Choline dehydrogenase                             |

Table S10. The orthologue table of the O55 and O157 strains Page 12

| Locus_tag <sup>a</sup> |         |        | Gene   | Product                                                                                         |
|------------------------|---------|--------|--------|-------------------------------------------------------------------------------------------------|
| CB9615                 | Sakai   | EDL933 |        |                                                                                                 |
| G2583_0416             | ECs0358 | Z0399  | betB   | Betaine aldehyde dehydrogenase                                                                  |
| G2583_0417             | ECs0359 | Z0400  | betI   | Transcriptional regulator                                                                       |
| G2583_0418             | ECs0360 | Z0401  | betT   | High-affinity choline transport protein                                                         |
|                        | ECs0361 |        | -      | hypothetical protein                                                                            |
| G2583_0419             | ECs0362 | Z0402  | AidA-I | AidA-I adhesin-like protein                                                                     |
| G2583_0420             | ECs0363 | Z0403  | yahA   | LuxR-family transcriptional regulator/cyclic diguanylate phosphodiesterase (EAL) domain protein |
| G2583_0421             | ECs0364 | Z0404  | yahB   | Uncharacterized HTH-type transcriptional regulator                                              |
| G2583_0421             | ECs0365 | Z0405  | yahB   | Uncharacterized HTH-type transcriptional regulator                                              |
| G2583_0422             | ECs0366 | Z0406  | yahC   | Uncharacterized protein yahC                                                                    |
| G2583_0423             | ECs0367 | Z0407  | yahD   | Ankyrin repeat protein                                                                          |
| G2583_0424             | ECs0368 | Z0408  | yahE   | hypothetical protein                                                                            |
| G2583_0425             | ECs0369 | Z0409  | yahF   | Bacterial FdrA protein                                                                          |
| G2583_0426             | ECs0370 | Z0410  | yahG   | hypothetical protein                                                                            |
|                        | ECs0371 |        | -      | hypothetical protein                                                                            |
| G2583_0427             |         |        | yahH   | hypothetical protein                                                                            |
| G2583_0428             | ECs0372 | Z0412  | yahI   | Carbamate kinase family protein                                                                 |
| G2583_0429             | ECs0373 | Z0413  | yahJ   | Amidohydrolase family protein                                                                   |
| G2583_0430             |         | Z0414  | -      | hypothetical protein                                                                            |
| G2583_0431             | ECs0374 | Z0415  | -      | Sugar ABC transporter, periplasmic sugar-binding                                                |
| G2583_0432             | ECs0375 | Z0416  | -      | Sugar ABC transporter, ATP-binding protein                                                      |
| G2583_0432             | ECs0376 | Z0417  | -      | Sugar ABC transporter, ATP-binding protein                                                      |
| G2583_0433             | ECs0377 | Z0418  | -      | Putative permease component of transport system, probably ribose specific                       |
| G2583_0434             | ECs0378 | Z0419  | -      | Putative permease component of transport system                                                 |
| G2583_0435             | ECs0379 | Z0420  | yahK   | Oxidoreductase, zinc-binding dehydrogenase family                                               |
| G2583_0436             | ECs0380 | Z0421  | yahL   | hypothetical protein                                                                            |
| G2583_0437             |         | RNA009 | -      | Xaa tRNA                                                                                        |
| G2583_0438             | ECs0381 | Z0423  | yahM   | hypothetical protein                                                                            |
| G2583_0439             | ECs0382 | Z0424  | yahN   | Putative homoserine/threonine efflux protein                                                    |
| G2583_0440             | ECs0383 | Z0425  | yahO   | hypothetical protein                                                                            |
| G2583_0441             | ECs0384 | Z0426  | prpR   | Propionate catabolism operon regulatory protein PrpR                                            |
| G2583_0442             | ECs0385 | Z0427  | prpB   | Methylisocitrate lyase                                                                          |
| G2583_0443             | ECs0386 | Z0428  | prpC   | 2-methylcitrate synthase                                                                        |
| G2583_0444             | ECs0387 | Z0429  | prpD   | 2-methylcitrate dehydratase                                                                     |
| G2583_0445             | ECs0388 | Z0430  | prpE   | Propionate--CoA ligase                                                                          |
| G2583_0446             |         |        | nrdB   | mannitol-1-phosphate 5-dehydrogenase                                                            |
|                        |         | Z0431  | -      | hypothetical protein                                                                            |
| G2583_0447             | ECs0389 | Z0432  | codB   | Cytosine permease                                                                               |
| G2583_0448             | ECs0390 | Z0433  | codA   | Cytosine deaminase and related metal-dependent hydrolases                                       |
| G2583_0449             | ECs0391 | Z0434  | cynR   | DNA-binding transcriptional regulator CynR                                                      |
| G2583_0450             | ECs0392 | Z0435  | cynT   | Carbonic anhydrase 1                                                                            |
| G2583_0451             | ECs0393 | Z0436  | cynS   | Cyanate hydratase                                                                               |

Table S10. The orthologue table of the O55 and O157 strains Page 13

| Locus_tag <sup>a</sup> |         |        | Gene | Product                                                                     |
|------------------------|---------|--------|------|-----------------------------------------------------------------------------|
| CB9615                 | Sakai   | EDL933 |      |                                                                             |
| G2583_0452             | ECs0394 | Z0437  | cynX | Cyanate transport                                                           |
| G2583_0453             | ECs0395 | Z0438  | lacA | Galactoside O-acetyltransferase LacA                                        |
| G2583_0454             | ECs0396 | Z0439  | lacY | Lactose permease                                                            |
| G2583_0455             | ECs0397 | Z0440  | lacZ | Beta-D-galactosidase                                                        |
| G2583_0456             | ECs0398 | Z0441  | lacI | lac repressor                                                               |
| G2583_0457             | ECs0399 | Z0442  | -    | putative AraC-like transcriptional regulator                                |
| G2583_0458             | ECs0400 | Z0443  | -    | Beta-lactamase fold protein                                                 |
| G2583_0459             | ECs0401 | Z0444  | mhpR | DNA-binding transcriptional activator, 3HPP-binding                         |
| G2583_0460             | ECs0402 | Z0445  | mhpA | 3-(3-hydroxy-phenyl)propionate/3-hydroxycinnamic acid hydroxylase           |
| G2583_0461             | ECs0403 | Z0446  | mhpB | 2,3-dihydroxyphenylpropionate/2,3-dihydroxycinnamic acid 1,2- dioxygenase   |
| G2583_0462             | ECs0404 | Z0447  | mhpC | 2-hydroxy-6-oxononadienedioate/2-hydroxy-6-oxononatrienedioate hydrolase    |
| G2583_0463             | ECs0405 | Z0448  | mhpD | 2-keto-4-pentenoate hydratase                                               |
| G2583_0464             | ECs0406 | Z0450  | mhpF | Acetaldehyde dehydrogenase                                                  |
| G2583_0465             | ECs0407 | Z0452  | mhpE | 4-hydroxy-2-oxovalerate aldolase                                            |
| G2583_0466             | ECs0408 | Z0453  | mhpT | Putative transport protein                                                  |
| G2583_0467             | ECs0409 | Z0454  | yaiL | Nucleoprotein/polynucleotide-associated enzyme                              |
| G2583_0468             | ECs0410 | Z0455  | frmB | putative esterase                                                           |
| G2583_0469             | ECs0411 | Z0456  | frmA | S-(hydroxymethyl)glutathione dehydrogenase                                  |
| G2583_0470             | ECs0412 | Z0457  | frmR | regulator protein FrmR                                                      |
| G2583_0471             | ECs0413 | Z0458  | afuC | Fe(3+) ions import ATP-binding protein fbpC                                 |
| G2583_0472             | ECs0414 | Z0459  | afuB | Binding-protein-dependent transport systems inner membrane component        |
| G2583_0473             | ECs0415 | Z0460  | afuA | Periplasmic ferric iron-binding protein                                     |
| G2583_0474             | ECs0416 | Z0461  | UhpC | putative permease; hexosephosphate transport                                |
| G2583_0475             | ECs0417 | Z0462  | -    | Integral membrane sensor signal transduction histidine kinase               |
| G2583_0476             | ECs0418 | Z0463  | -    | Putative response regulator                                                 |
| G2583_0477             | ECs0419 | Z0464  | tauA | Taurine transport system periplasmic protein                                |
| G2583_0478             | ECs0420 | Z0465  | tauB | Taurine import ATP-binding protein tauB                                     |
| G2583_0479             | ECs0421 | Z0466  | tauC | ABC-type nitrate/sulfonate/bicarbonate transport system, permease component |
| G2583_0480             | ECs0422 | Z0467  | tauD | Taurine dioxygenase                                                         |
| G2583_0481             | ECs0423 | Z0468  | hemB | Delta-aminolevulinic acid dehydratase                                       |
| G2583_0482             | ECs0424 | Z0469  | yaiU | Putative flagellin structural protein                                       |
| G2583_0483             | ECs0425 | Z0470  | yaiV | putative DNA-binding transcriptional regulator                              |
| G2583_0484             | ECs0426 | Z0472  | ampH | Penicillin-binding protein ampH                                             |
| G2583_0485             | ECs0427 | Z0473  | sbmA | Inner-membrane transport protein, Microcin 25                               |
| G2583_0486             | ECs0428 | Z0474  | yaiW | hypothetical protein                                                        |
| G2583_0487             | ECs0429 | Z0475  | yaiY | Inner membrane protein yaiY                                                 |
| G2583_0488             | ECs0430 | Z0476  | yaiZ | hypothetical protein                                                        |
| G2583_0489             | ECs0431 | Z0477  | ddlA | D-alanine--D-alanine ligase A                                               |

Table S10. The orthologue table of the O55 and O157 strains Page 14

| Locus_tag <sup>a</sup> |         |        | Gene | Product                                                                           |
|------------------------|---------|--------|------|-----------------------------------------------------------------------------------|
| CB9615                 | Sakai   | EDL933 |      |                                                                                   |
| G2583_0490             | ECs0432 | Z0478  | iraP | Anti-adaptor protein iraP                                                         |
| G2583_0491             | ECs0433 | Z0479  | phoA | Alkaline phosphatase                                                              |
| G2583_0492             | ECs0434 | Z0480  | psiF | Phosphate starvation-inducible protein                                            |
| G2583_0493             | ECs0435 | Z0481  | adrA | MASE2 domain/diguanylate cyclase                                                  |
| G2583_0494             | ECs0437 | Z0482  | proC | Pyrroline-5-carboxylate reductase                                                 |
| G2583_0495             | ECs0436 | Z0483  | yail | hypothetical protein                                                              |
| G2583_0496             | ECs0438 | Z0484  | aroL | Shikimate kinase 2                                                                |
| G2583_0497             | ECs0439 | Z0485  | yaiA | hypothetical protein                                                              |
| G2583_0498             | ECs0440 | Z0486  | aroM | AroM protein                                                                      |
| G2583_0499             | ECs0441 | Z0487  | yaiE | UPF0345 protein yaiE                                                              |
| G2583_0500             |         |        | ydbD | hypothetical protein                                                              |
| G2583_0500             | ECs0442 | Z0489  | ydbD | hypothetical protein                                                              |
| G2583_0501             | ECs0443 | Z0491  | -    | hypothetical protein                                                              |
| G2583_0502             | ECs0445 | Z0492  | rdgC | Recombination-associated protein rdgC                                             |
| G2583_0503             | ECs0444 | Z0493  | mak  | Possible NAGC-like transcriptional regulator                                      |
| G2583_0504             | ECs0446 | Z0494  | araJ | protein AraJ                                                                      |
| G2583_0505             | ECs0447 | Z0495  | sbcC | Nuclease SbcCD, C subunit                                                         |
| G2583_0506             | ECs0448 | Z0496  | sbcD | Nuclease sbcCD subunit D                                                          |
| G2583_0507             | ECs0449 | Z0497  | phoB | Positive response regulator for pho regulon                                       |
| G2583_0508             | ECs0450 | Z0498  | phoR | Signal transduction histidine kinase                                              |
| G2583_0509             | ECs0451 | Z0499  | brnQ | Branched-chain amino acid transport system 2 carrier protein                      |
| G2583_0510             | ECs0452 | Z0500  | proY | Proline-specific permease proY                                                    |
| G2583_0511             | ECs0453 | Z0501  | malZ | Maltodextrin glucosidase                                                          |
| G2583_0512             | ECs0454 | Z0502  | -    | hypothetical protein                                                              |
| G2583_0513             | ECs0455 | Z0503  | acpH | Acyl carrier protein phosphodiesterase                                            |
| G2583_0514             | ECs0456 | Z0504  | queA | S-adenosylmethionine:tRNA ribosyltransferase-                                     |
| G2583_0515             | ECs0457 | Z0505  | tgt  | Queueine tRNA-ribosyltransferase                                                  |
| G2583_0516             | ECs0458 | Z0506  | yajC | UPF0092 membrane protein yajC                                                     |
| G2583_0517             | ECs0459 | Z0507  | secD | Protein-export membrane protein secD                                              |
| G2583_0518             | ECs0460 | Z0508  | secF | Protein-export membrane protein SecF                                              |
| G2583_0519             | ECs0461 | Z0509  | -    | UPF0156 protein Z0509/ECs0461                                                     |
| G2583_0520             | ECs0462 | Z0510  | -    | Plasmid stabilization system protein, RelE/ParE family                            |
| G2583_0521             | ECs0463 | Z0511  | yajD | hypothetical protein                                                              |
| G2583_0522             | ECs0464 | Z0512  | tsx  | Nucleoside-specific channel-forming protein, Tsx                                  |
| G2583_0523             | ECs0465 | Z0513  | yajI | hypothetical protein                                                              |
| G2583_0524             | ECs0466 | Z0514  | nrdR | ATP-cone domain protein                                                           |
| G2583_0525             | ECs0467 | Z0515  | ribD | Bifunctional deaminase-reductase, C-terminal:Riboflavin biosynthesis protein RibD |
| G2583_0526             | ECs0468 | Z0516  | ribE | 6,7-dimethyl-8-ribityllumazine synthase                                           |
| G2583_0527             | ECs0469 | Z0518  | nusB | N utilization substance protein B homolog                                         |
| G2583_0528             | ECs0470 | Z0519  | thiL | Thiamine-monophosphate kinase                                                     |
| G2583_0529             | ECs0471 | Z0520  | pgpA | Phosphatidylglycerophosphatase A                                                  |
| G2583_0530             | ECs0472 | Z0521  | -    | hypothetical protein                                                              |

Table S10. The orthologue table of the O55 and O157 strains Page 15

| Locus_tag <sup>a</sup> |         |        | Gene | Product                                                        |
|------------------------|---------|--------|------|----------------------------------------------------------------|
| CB9615                 | Sakai   | EDL933 |      |                                                                |
| G2583_0531             | ECs0473 | Z0522  | yajO | Oxidoreductase, aldo/keto reductase family                     |
| G2583_0532             | ECs0474 | Z0523  | dxs  | 1-deoxy-D-xylulose-5-phosphate synthase                        |
| G2583_0533             | ECs0475 | Z0524  | ispA | Geranyltranstransferase                                        |
| G2583_0534             | ECs0476 | Z0525  | xseB | Exodeoxyribonuclease 7 small subunit                           |
| G2583_0535             | ECs0477 | Z0526  | thil | Thiamine biosynthesis protein thil                             |
| G2583_0536             | ECs0478 | Z0527  | yajL | 4-methyl-5(Beta-hydroxyethyl)-thiazole monophosphate synthesis |
| G2583_0537             | ECs0479 | Z0528  | panE | 2-dehydropantoate 2-reductase                                  |
| G2583_0538             | ECs0480 | Z0529  | yajQ | UPF0234 protein yajQ                                           |
| G2583_0539             | ECs0481 | Z0530  | yajR | Hypothetical transport protein YajR                            |
| G2583_0540             | ECs0482 | Z0531  | cyoE | Protoheme IX farnesyltransferase                               |
| G2583_0541             | ECs0483 | Z0532  | cyoD | Cytochrome O ubiquinol oxidase protein CyoD                    |
| G2583_0542             | ECs0484 | Z0533  | cyoC | Cytochrome o ubiquinol oxidase subunit 3                       |
| G2583_0543             | ECs0485 | Z0534  | cyoB | Ubiquinol oxidase subunit 1                                    |
| G2583_0544             | ECs0486 | Z0535  | cyoA | Cytochrome o ubiquinol oxidase, subunit II                     |
| G2583_0545             | ECs0487 | Z0536  | ampG | Regulates beta-lactamase synthesis                             |
| G2583_0546             | ECs0488 | Z0537  | yajG | hypothetical protein                                           |
| G2583_0547             | ECs0489 | Z0539  | bolA | transcriptional regulator BolA                                 |
| G2583_0548             | ECs0490 | Z0541  | tig  | Trigger factor                                                 |
| G2583_0549             | ECs0491 | Z0542  | clpP | ATP-dependent Clp protease proteolytic subunit                 |
| G2583_0550             | ECs0492 | Z0543  | clpX | ATP-dependent Clp protease ATP-binding subunit clpX            |
| G2583_0551             | ECs0493 | Z0545  | lon  | DNA-binding ATP-dependent protease La                          |
| G2583_0552             | ECs0494 | Z0547  | hupB | DNA-binding protein HU-beta                                    |
| G2583_0553             | ECs0495 | Z0548  | ppiD | Peptidylprolyl isomerase                                       |
| G2583_0554             | ECs0496 | Z0549  | ybaV | Competence protein ComEA                                       |
| G2583_0555             | ECs0497 | Z0550  | ybaW | Thioesterase family protein                                    |
| G2583_0556             | ECs0498 | Z0551  | queC | Queuosine biosynthesis protein queC                            |
| G2583_0557             | ECs0499 | Z0552  | ybaE | Bacterial extracellular solute-binding protein, family 5       |
| G2583_0558             | ECs0500 | Z0553  | cof  | Predicted hydrolases of the HAD superfamily                    |
| G2583_0559             | ECs0501 | Z0555  | ybaO | Putative transcriptional regulator YbaO                        |
| G2583_0560             | ECs0502 | Z0557  | mdlA | Multidrug resistance, ATP-binding protein mdlA                 |
| G2583_0561             | ECs0503 | Z0559  | mdlB | Multidrug resistance-like ATP-binding protein mdlB             |
| G2583_0562             | ECs0504 | Z0562  | glnK | Glutamine synthetase regulation protein                        |
| G2583_0563             | ECs0505 | Z0563  | amtB | Ammonia channel precursor                                      |
| G2583_0564             | ECs0506 | Z0564  | tesB | Acyl-CoA thioesterase II                                       |
| G2583_0565             | ECs0507 | Z0565  | ybaY | Glycoprotein/polysaccharide metabolism precursor               |
| G2583_0566             | ECs0508 | Z0566  | ybaZ | hypothetical protein                                           |
| G2583_0567             | ffs     | RNA010 | ffs  | ncRNA                                                          |
| G2583_0568             | ECs0509 | Z0568  | ybaA | hypothetical protein                                           |
| G2583_0569             | ECs0510 | Z0569  | ylaB | hypothetical protein                                           |
| G2583_0570             | ECs0511 | Z0570  | ylaC | hypothetical protein                                           |
| G2583_0571             | ECs0512 | Z0571  | maa  | Maltose O-acetyltransferase                                    |
| G2583_0572             | ECs0513 | Z0573  | hha  | Haemolysin expression modulating protein                       |
| G2583_0573             | ECs0514 | Z0574  | ybaJ | hypothetical protein                                           |

Table S10. The orthologue table of the O55 and O157 strains Page 16

| Locus_tag <sup>a</sup> |         |        | Gene | Product                                                                  |
|------------------------|---------|--------|------|--------------------------------------------------------------------------|
| CB9615                 | Sakai   | EDL933 |      |                                                                          |
| G2583_0574             | ECs0515 | Z0576  | acrB | Acriflavine resistance protein B                                         |
| G2583_0575             | ECs0516 | Z0578  | acrA | Acriflavine resistance protein A                                         |
| G2583_0576             | ECs0517 | Z0579  | acrR | DNA-binding transcriptional repressor                                    |
| G2583_0577             | ECs0518 | Z0581  | kefA | Potassium efflux system KefA                                             |
| G2583_0578             | ECs0519 | Z0583  | ybaM | hypothetical protein                                                     |
| G2583_0579             | ECs0520 | Z0584  | priC | Primosomal replication protein N"                                        |
| G2583_0580             | ECs0521 | Z0585  | ybaN | Inner membrane protein ybaN                                              |
| G2583_0581             | ECs0522 | Z0586  | apt  | Adenine phosphoribosyltransferase                                        |
| G2583_0582             | ECs0523 | Z0587  | dnaX | DNA polymerase III, tau subunit                                          |
| G2583_0583             | ECs0524 | Z0588  | ybaB | UPF0133 protein ybaB                                                     |
| G2583_0584             | ECs0525 | Z0589  | recR | Recombination protein recR                                               |
| G2583_0585             | ECs0526 | Z0590  | htpG | Chaperone protein htpG                                                   |
| G2583_0586             | ECs0527 | Z0591  | adk  | Adenylate kinase                                                         |
| G2583_0587             | ECs0528 | Z0592  | hemH | Ferrochelataase                                                          |
| G2583_0588             | ECs0529 | Z0593  | aes  | Acetyl esterase                                                          |
| G2583_0589             | ECs0530 | Z0596  | gsk  | Inosine-guanosine kinase                                                 |
| G2583_0590             | ECs0531 | Z0597  | ybaL | Transporter, monovalent cation:proton antiporter-2                       |
| G2583_0591             | ECs0532 | Z0598  | fsr  | Fosmidomycin resistance protein                                          |
| G2583_0592             | ECs0533 | Z0599  | ushA | UDP-sugar hydrolase/5'-nucleotidase                                      |
| G2583_0593             | ECs0534 | Z0600  | ybaK | hypothetical protein                                                     |
| G2583_0594             |         |        | sroB | ncRNA                                                                    |
| G2583_0595             | ECs0535 | Z0601  | ybaP | GumN family protein                                                      |
| G2583_0596             | ECs0536 | Z0602  | ybaQ | Addiction module antidote protein, HigA family                           |
| G2583_0597             | ECs0537 | Z0604  | copA | Copper-transporting P-type ATPase                                        |
| G2583_0598             | ECs0538 | Z0606  | ybaS | Glutaminase 1                                                            |
| G2583_0599             | ECs0539 | Z0607  | ybaT | Amino acid permease family protein                                       |
| G2583_0600             | ECs0540 | Z0608  | -    | Putative outer membrane export protein                                   |
| G2583_0601             | ECs0541 | Z0609  | -    | hypothetical protein                                                     |
| G2583_0601             | ECs0542 | Z0615  | -    | hypothetical protein                                                     |
| G2583_0602             | ECs0543 | Z0634  | -    | Putative cytoplasmic membrane export protein                             |
| G2583_0603             | ECs0544 | Z0635  | -    | Membrane spanning export protein                                         |
| G2583_0604             | ECs0545 | Z0636  | cueR | DNA-binding transcriptional activator of copper-responsive regulon genes |
| G2583_0605             | ECs0546 | Z0638  | -    | hypothetical protein                                                     |
|                        | ECs0547 |        | -    | hypothetical protein                                                     |
| G2583_0606             | ECs0548 | Z0639  | -    | hypothetical protein                                                     |
| G2583_0607             | ECs0549 | Z0640  | -    | hypothetical protein                                                     |
|                        | ECs0550 |        | -    | hypothetical protein                                                     |
| G2583_0608             | ECs0551 | Z0641  | ybbJ | Nodulation efficiency family protein                                     |
| G2583_0609             | ECs0552 | Z0642  | qmcA | putative protease                                                        |
| G2583_0610             | ECs0553 | Z0643  | ybbL | ABC transporter, ATP-binding protein                                     |
| G2583_0611             | ECs0554 | Z0644  | ybbM | Putative metal resistance protein                                        |
| G2583_0612             | ECs0555 | Z0645  | ybbN | putative thioredoxin-like protein                                        |



Table S10. The orthologue table of the O55 and O157 strains Page 17

| Locus_tag <sup>a</sup> |         |        | Gene | Product                                                                      |
|------------------------|---------|--------|------|------------------------------------------------------------------------------|
| CB9615                 | Sakai   | EDL933 |      |                                                                              |
| G2583_0613             | ECs0556 | Z0646  | ybbO | Oxidoreductase, short chain dehydrogenase/reductase family                   |
| G2583_0614             | ECs0558 | Z0647  | tesA | Acyl-CoA thioesterase I                                                      |
| G2583_0615             | ECs0557 | Z0648  | ybbA | Uncharacterized ABC transporter ATP-binding protein ybbA                     |
| G2583_0616             | ECs0559 | Z0649  | ybbP | putative oxidoreductase                                                      |
| G2583_0617             | ECs0560 | Z0651  | rhsD | RHS Repeat family protein                                                    |
| G2583_0618             | ECs0561 | Z0653  | ybbD | hypothetical protein                                                         |
| G2583_0619             |         |        | -    | ncRNA                                                                        |
| G2583_0620             | ECs0562 | Z0654  | -    | hypothetical protein                                                         |
| G2583_0621             |         | Z0655  | -    | hypothetical protein                                                         |
| G2583_0622             | ECs0563 | Z0656  | yIbG | hypothetical protein                                                         |
| G2583_0623             | ECs0564 | Z0657  | ybbB | tRNA 2-selenouridine synthase                                                |
| G2583_0624             | ECs0565 | Z0658  | allS | DNA-binding transcriptional activator of the allD operon                     |
| G2583_0625             | ECs0566 | Z0659  | allA | Ureidoglycolate hydrolase                                                    |
| G2583_0626             | ECs0567 | Z0660  | allR | Putative regulator                                                           |
| G2583_0627             | ECs0568 | Z0661  | gcl  | Glyoxylate carboligase                                                       |
| G2583_0628             | ECs0569 | Z0662  | hyi  | Glyoxylate-induced protein                                                   |
| G2583_0629             | ECs0570 | Z0663  | glxR | 2-hydroxy-3-oxopropionate reductase                                          |
| G2583_0630             | ECs0571 | Z0664  | ybbV | hypothetical protein                                                         |
| G2583_0631             | ECs0572 | Z0665  | ybbW | Cytosine/uracil/thiamine/allantoin permeases                                 |
| G2583_0632             | ECs0573 | Z0666  | allB | Dihydroorotase and related cyclic amidohydrolases                            |
| G2583_0632             | ECs0574 | Z0667  | allB | Dihydroorotase and related cyclic amidohydrolases                            |
| G2583_0633             | ECs0575 | Z0668  | ybbY | Putative purine permease ybbY                                                |
| G2583_0634             | ECs0576 | Z0669  | glxK | Glycerate kinase                                                             |
| G2583_0635             | ECs0577 | Z0670  | yIbA | hypothetical protein                                                         |
| G2583_0636             | ECs0578 | Z0671  | allC | Allantoate amidohydrolase                                                    |
| G2583_0637             | ECs0579 | Z0672  | allD | Ureidoglycolate dehydrogenase                                                |
| G2583_0638             | ECs0580 | Z0673  | fdrA | Bacterial FdrA protein                                                       |
| G2583_0639             | ECs0581 | Z0674  | yIbE | hypothetical protein                                                         |
| G2583_0640             | ECs0582 | Z0675  | yIbF | putative carboxylase                                                         |
| G2583_0641             | ECs0583 | Z0676  | ybcF | Carbamate kinase                                                             |
| G2583_0642             | ECs0584 | Z0677  | purK | Phosphoribosylaminoimidazole carboxylase, ATPase subunit                     |
| G2583_0643             | ECs0585 | Z0678  | purE | Phosphoribosylaminoimidazole carboxylase catalytic subunit                   |
| G2583_0644             | ECs0586 | Z0679  | lpxH | UDP-2,3-diacetylglucosamine hydrolase                                        |
| G2583_0645             | ECs0587 | Z0680  | ppiB | Peptidyl-prolyl cis-trans isomerase                                          |
| G2583_0646             | ECs0588 | Z0681  | cysS | Cysteinyl-tRNA synthetase                                                    |
| G2583_0647             | ECs0589 | Z0682  | ybcI | hypothetical protein                                                         |
| G2583_0648             | ECs0590 | Z0683  | ybcJ | hypothetical protein                                                         |
| G2583_0649             | ECs0591 | Z0684  | foID | Bifunctional protein foID [Includes: Methylenetetrahydrofolate dehydrogenase |
| G2583_0650             | ECs0592 | Z0686  | sfmA | Putative fimbrial-like protein                                               |

Table S10. The orthologue table of the O55 and O157 strains Page 18

| Locus_tag <sup>a</sup> |          |          | Gene | Product                                                         |
|------------------------|----------|----------|------|-----------------------------------------------------------------|
| CB9615                 | Sakai    | EDL933   |      |                                                                 |
| G2583_0651             | ECs0593  | Z0688    | sfmC | Chaperone protein FimC homolog                                  |
| G2583_0652             | ECs0594  | Z0689    | sfmD | Outer membrane usher protein SfmD                               |
| G2583_0653             | ECs0595  | Z0690    | sfmH | Involved in fimbrial assembly precursor                         |
| G2583_0654             | ECs0596  | Z0691    | sfmF | Putative fimbrial protein                                       |
| G2583_0655             | ECs0597  | Z0693    | fimZ | Fimbrial Z protein                                              |
| G2583_0656             | argU     | RNA011   | argU | Arg tRNA                                                        |
| G2583_0657             | Indel-17 | Indel-17 | intD | Prophage DLP12 integrase                                        |
| G2583_0658             | Indel-17 | Indel-17 | -    | Hypothetical phage protein                                      |
| G2583_0659             | Indel-17 | Indel-17 | -    | Hypothetical phage protein                                      |
| G2583_0660             | Indel-17 | Indel-17 | -    | Unknown protein encoded within prophage                         |
| G2583_0661             | Indel-17 | Indel-17 | -    | protein of unknown function DUF1382                             |
| G2583_0662             | Indel-17 | Indel-17 | -    | hypothetical protein                                            |
| G2583_0663             | Indel-17 | Indel-17 | ybcC | Putative exonuclease encoded by prophage CP-933K                |
| G2583_0664             | Indel-17 | Indel-17 | betW | Bet protein                                                     |
| G2583_0665             | Indel-17 | Indel-17 | gam  | Host-nuclease inhibitor protein gam                             |
| G2583_0666             | Indel-17 | Indel-17 | kil  | Prophage Kil protein                                            |
| G2583_0667             | Indel-17 | Indel-17 | -    | Hypothetical phage associated protein                           |
| G2583_0668             | Indel-17 | Indel-17 | -    | hypothetical protein                                            |
| G2583_0669             | Indel-17 | Indel-17 | -    | Putative repressor protein                                      |
| G2583_0670             | Indel-17 | Indel-17 | -    | hypothetical protein                                            |
| G2583_0671             | Indel-17 | Indel-17 | cII  | hypothetical protein                                            |
| G2583_0672             | Indel-17 | Indel-17 | -    | Phage replication protein O                                     |
| G2583_0673             | Indel-17 | Indel-17 | -    | replication protein P                                           |
| G2583_0674             | Indel-17 | Indel-17 | renD | Ren protein                                                     |
| G2583_0675             | Indel-17 | Indel-17 | emrE | EmrE SMR transporter                                            |
| G2583_0676             | Indel-17 | Indel-17 | ybcK | DLP12 prophage; predicted recombinase                           |
| G2583_0677             | Indel-17 | Indel-17 | ybcL | Putative phosphatidylethanolamine-binding protein               |
| G2583_0678             | Indel-17 | Indel-17 | ybcM | DLP12 prophage; predicted DNA-binding transcriptional regulator |
| G2583_0679             | Indel-17 | Indel-17 | ylcH | hypothetical protein                                            |
| G2583_0680             | Indel-17 | Indel-17 | ybcN | hypothetical protein                                            |
| G2583_0681             | Indel-17 | Indel-17 | ninE | NinE                                                            |
| G2583_0682             | Indel-17 | Indel-17 | ybcO | hypothetical protein                                            |
| G2583_0683             | Indel-17 | Indel-17 | rusA | Crossover junction endodeoxyribonuclease rusA                   |
| G2583_0684             | Indel-17 | Indel-17 | ylcG | hypothetical protein                                            |
| G2583_0685             | Indel-17 | Indel-17 | ybcQ | Phage antitermination Q type 1 family                           |
| G2583_0686             | Indel-17 | Indel-17 | nmpC | Outer membrane porin protein C                                  |
| G2583_0687             | Indel-17 | Indel-17 | essD | hypothetical protein                                            |
| G2583_0688             | Indel-17 | Indel-17 | ybcS | Lysozyme                                                        |
| G2583_0689             | Indel-17 | Indel-17 | rzpD | Putative Rz endopeptidase from lambdoid prophage DLP12          |
| G2583_0690             | Indel-17 | Indel-17 | borD | Lambdoid prophage DLP12 Bor-like protein                        |
| G2583_0691             | Indel-17 | Indel-17 | nohB | Bacteriophage DNA packaging protein                             |
| G2583_0692             | Indel-17 | Indel-17 | -    | Bacteriophage tail assembly protein                             |

Table S10. The orthologue table of the O55 and O157 strains Page 19

| Locus_tag <sup>a</sup> |          |          | Gene | Product                                                                     |
|------------------------|----------|----------|------|-----------------------------------------------------------------------------|
| CB9615                 | Sakai    | EDL933   |      |                                                                             |
| G2583_0693             | Indel-17 | Indel-17 | -    | Lambda prophage-derived head-to-tail joining protein W                      |
| G2583_0694             | Indel-17 | Indel-17 | -    | Putative capsid structural protein of prophage                              |
| G2583_0695             | Indel-17 | Indel-17 | -    | Minor capsid protein C                                                      |
| G2583_0696             | Indel-17 | Indel-17 | -    | Putative head-DNA stabilization protein of prophage                         |
| G2583_0697             | Indel-17 | Indel-17 | -    | phage major capsid protein E                                                |
| G2583_0698             | Indel-17 | Indel-17 | -    | Putative DNA packaging protein of prophage                                  |
| G2583_0699             | Indel-17 | Indel-17 | -    | Phage Head-Tail Attachment                                                  |
| G2583_0700             | Indel-17 | Indel-17 | -    | prophage minor tail protein Z                                               |
| G2583_0701             | Indel-17 | Indel-17 | -    | Permeases of the major facilitator superfamily                              |
| G2583_0702             | Indel-17 | Indel-17 | -    | Putative tail component of prophage                                         |
| G2583_0703             | Indel-17 | Indel-17 | -    | phage minor tail protein G                                                  |
| G2583_0704             | Indel-17 | Indel-17 | -    | Minor tail protein T                                                        |
| G2583_0705             | Indel-17 | Indel-17 | -    | Minor tail protein H                                                        |
| G2583_0706             | Indel-17 | Indel-17 | -    | Minor tail protein M                                                        |
| G2583_0707             | Indel-17 | Indel-17 | -    | Phage-related protein                                                       |
| G2583_0708             | Indel-17 | Indel-17 | -    | Putative tail fiber component K of prophage                                 |
| G2583_0709             | Indel-17 | Indel-17 | -    | Putative tail component of prophage CP-933K                                 |
| G2583_0710             | Indel-17 | Indel-17 | -    | Host specificity protein J                                                  |
| G2583_0711             | Indel-17 | Indel-17 | -    | hypothetical protein                                                        |
| G2583_0712             | Indel-17 | Indel-17 | ydfN | PPE-repeat proteins                                                         |
| G2583_0713             | Indel-17 | Indel-17 | ynaC | Tail fiber assembly protein                                                 |
| G2583_0714             | Indel-17 | Indel-17 | ybcY | unknown protein encoded by prophage CP-933X                                 |
| G2583_0715             | Indel-17 | Indel-17 | ylcE | tail fiber assembly protein                                                 |
| G2583_0716             | Indel-17 | Indel-17 | -    | Putative protease encoded within prophage CP-933X                           |
| G2583_0717             | Indel-17 | Indel-17 | ompT | Protease VII                                                                |
| G2583_0718             | Indel-17 | Indel-17 | -    | Helix-turn-helix domain protein                                             |
| G2583_0719             | Indel-17 | Indel-17 | yjaB | Hypothetical acetyltransferase YjaB                                         |
| G2583_0720             | ECs0598  | Z0696    | envY | envelope protein; thermoregulation of porin biosynthesis                    |
| G2583_0721             | ECs0599  | Z0697    | ybcH | hypothetical protein                                                        |
| G2583_0722             | ECs0600  | Z0698    | nfrA | Bacteriophage N4 adsorption protein A                                       |
| G2583_0723             | ECs0601  | Z0699    | nfrB | Bacteriophage N4 adsorption protein B                                       |
| G2583_0724             | ECs0602  | Z0700    | yhhI | ISEc4, transposase                                                          |
| G2583_0725             |          | Z0701    | -    | hypothetical protein                                                        |
| G2583_0726             | ECs0603  | Z0702    | -    | YD repeat                                                                   |
| G2583_0727             | ECs0604  |          | -    | hypothetical protein                                                        |
| G2583_0728             | ECs0605  | Z0705    | rhlI | Rhs core protein with extension                                             |
| G2583_0729             | ECs0606  | Z0706    | -    | conserved hypothetical protein                                              |
| G2583_0730             | ECs0607  | Z0707    | -    | Type VI secretion system Vgr family protein                                 |
| G2583_0731             | ECs0608  | Z0708    | cusS | Sensor kinase cusS                                                          |
| G2583_0732             | ECs0609  | Z0709    | cusR | DNA-binding response regulator in two-component regulatory system with CusS |
| G2583_0733             | ECs0610  | Z0711    | cusC | Cation efflux system protein cusC precursor                                 |
| G2583_0734             | ECs0611  | Z0712    | cusF | Cation efflux system protein cusF precursor                                 |
| G2583_0735             | ECs0612  | Z0713    | cusB | Cation efflux system protein CusB                                           |

Table S10. The orthologue table of the O55 and O157 strains Page 20

| Locus_tag <sup>a</sup> |         |        | Gene  | Product                                                                                            |
|------------------------|---------|--------|-------|----------------------------------------------------------------------------------------------------|
| CB9615                 | Sakai   | EDL933 |       |                                                                                                    |
| G2583_0736             | ECs0613 | Z0714  | cusA  | Cation efflux system protein cusA                                                                  |
| G2583_0737             | ECs0614 | Z0715  | pheP  | Phenylalanine-specific permease                                                                    |
| G2583_0738             | ECs0615 | Z0716  | ybdG  | Transporter, small conductance mechanosensitive ion channel (MscS) family                          |
| G2583_0739             | ECs0616 | Z0717  | nfsB  | Oxygen-insensitive NAD(P)H nitroreductase                                                          |
| G2583_0740             | ECs0617 | Z0718  | ybdF  | hypothetical protein                                                                               |
| G2583_0741             | ECs0618 | Z0719  | ybdJ  | putative membrane protein YbdJ                                                                     |
| G2583_0742             | ECs0619 | Z0720  | ybdK  | Carboxylate-amine ligase ybdK                                                                      |
| G2583_0743             | ECs0620 | Z0721  | mokC2 | Hok/Gef family protein                                                                             |
| G2583_0744             | ECs0621 | Z0722  | hokE  | Hok/Gef family protein                                                                             |
| G2583_0745             | ECs0622 | Z0723  | entD  | 4'-phosphopantetheinyl transferase entD                                                            |
| G2583_0746             | ECs0623 | Z0724  | fepA  | Ferrienterobactin receptor                                                                         |
| G2583_0747             | ECs0624 | Z0725  | fes   | Enterochelin esterase                                                                              |
| G2583_0748             |         | Z0726  | ybdZ  | MbtH-like protein                                                                                  |
| G2583_0749             | ECs0625 | Z0727  | entF  | Enterobactin synthetase component F                                                                |
| G2583_0750             | ECs0626 | Z0728  | fepE  | Ferric enterobactin transport protein fepE                                                         |
| G2583_0751             | ECs0627 | Z0729  | fepC  | Ferric enterobactin transport ATP-binding protein                                                  |
| G2583_0752             | ECs0628 | Z0731  | fepG  | Ferric enterobactin transport protein                                                              |
| G2583_0753             | ECs0629 | Z0732  | fepD  | ABC-type Fe <sup>3+</sup> -siderophore transport system, permease component                        |
| G2583_0754             | ECs0630 | Z0733  | entS  | Enterobactin exporter entS                                                                         |
| G2583_0755             | ECs0631 | Z0734  | fepB  | Ferrienterobactin ABC transporter, ferrienterobactin-binding periplasmic protein FepB              |
| G2583_0756             | ECs0632 | Z0735  | entC  | Isochorismate synthase entC                                                                        |
| G2583_0757             | ECs0633 | Z0736  | entE  | Enterobactin synthetase component E (Enterochelin synthase E) [Includes: 2,3-dihydroxybenzoate-AMP |
| G2583_0758             | ECs0634 | Z0737  | entB  | Isochorismatase                                                                                    |
| G2583_0759             | ECs0635 | Z0738  | entA  | 2,3-dihydroxybenzoate-2,3-dehydrogenase                                                            |
| G2583_0760             | ECs0636 | Z0739  | ybdB  | Esterase ybdB                                                                                      |
| G2583_0761             | ECs0637 | Z0740  | cstA  | Carbon starvation protein A                                                                        |
| G2583_0762             |         |        | ybdD  | hypothetical protein                                                                               |
| G2583_0763             | ECs0638 | Z0742  | ybdH  | Alcohol dehydrogenase, iron-containing                                                             |
| G2583_0764             | ECs0639 | Z0743  | ybdL  | Aminotransferase, classes I and II                                                                 |
| G2583_0765             | ECs0640 | Z0744  | ybdM  | Immunoglobulin-binding regulator family protein                                                    |
| G2583_0766             | ECs0641 | Z0746  | ybdN  | Phosphoadenosine phosphosulfate reductase family protein                                           |
| G2583_0767             | ECs0642 | Z0747  | ybdO  | putative transcriptional regulator LYSR-type                                                       |
| G2583_0768             | ECs0643 | Z0748  | dsbG  | Thiol:disulfide interchange protein DsbG                                                           |
| G2583_0769             | ECs0644 | Z0749  | ahpC  | Alkyl hydroperoxide reductase subunit C                                                            |
| G2583_0770             | ECs0645 | Z0750  | ahpF  | Alkyl hydroperoxide reductase subunit F                                                            |
| G2583_0771             | ECs0646 | Z0751  | uspG  | Universal stress protein UspG                                                                      |
| G2583_0772             | ECs0647 | Z0752  | ybdR  | Oxidoreductase, zinc-binding dehydrogenase family                                                  |
| G2583_0773             |         |        | -     | hypothetical protein                                                                               |
|                        | ECs0648 | Z0753  | -     | hypothetical protein                                                                               |

Table S10. The orthologue table of the O55 and O157 strains Page 21

| Locus_tag <sup>a</sup> |         |        | Gene | Product                                                             |
|------------------------|---------|--------|------|---------------------------------------------------------------------|
| CB9615                 | Sakai   | EDL933 |      |                                                                     |
| G2583_0774             | ECs0649 | Z0754  | rnk  | Regulator of nucleoside diphosphate kinase                          |
| G2583_0775             | ECs0650 | Z0755  | rna  | Ribonuclease I                                                      |
| G2583_0776             | ECs0651 | Z0756  | citT | Citrate carrier                                                     |
| G2583_0777             | ECs0652 | Z0757  | citG | 2-(5"-triphosphoribosyl)-3'-dephosphocoenzyme-A synthase            |
| G2583_0778             | ECs0653 | Z0758  | citX | Apo-citrate lyase phosphoribosyl-dephospho-CoA transferase          |
| G2583_0779             | ECs0654 | Z0759  | citF | Citrate lyase, alpha subunit                                        |
| G2583_0780             | ECs0655 | Z0760  | citE | Citrate lyase beta chain                                            |
| G2583_0781             | ECs0656 | Z0761  | citD | Citrate lyase acyl carrier protein                                  |
| G2583_0782             | ECs0657 | Z0762  | citC | Citrate lyase synthetase (Citrate (Pro-3S)-lyase ligase)            |
| G2583_0783             | ECs0658 | Z0764  | dpiB | Sensor histidine kinase DpiB                                        |
| G2583_0784             | ECs0659 | Z0765  | dpiA | transcriptional regulatory protein DpiA                             |
| G2583_0785             | ECs0660 | Z0766  | dcuC | C4-dicarboxylate transporter                                        |
| G2583_0786             | ECs0661 | Z0767  | pagP | Antimicrobial peptide resistance and lipid A acylation protein PagP |
| G2583_0787             | ECs0662 | Z0769  | cspE | hypothetical protein                                                |
| G2583_0788             | ECs0663 | Z0770  | crcB | camphor resistance protein CrcB                                     |
| G2583_0789             | ECs0664 | Z0771  | ybeM | UPF0012 hydrolase ybeM                                              |
| G2583_0790             | ECs0665 | Z0772  | tatE | Sec-independent protein translocase protein tatE                    |
| G2583_0791             | ECs0666 | Z0773  | lipA | Lipoyl synthase                                                     |
| G2583_0792             | ECs0667 | Z0774  | ybeF | putative DNA-binding transcriptional regulator                      |
| G2583_0793             | ECs0668 | Z0775  | lipB | Octanoyltransferase                                                 |
| G2583_0794             | ECs0669 | Z0776  | ybeD | Putative cytoplasmic protein                                        |
| G2583_0795             | ECs0670 | Z0777  | dacA | D-alanyl-D-alanine carboxypeptidase dacA precursor                  |
| G2583_0796             | ECs0671 | Z0778  | rlpA | Rare lipoprotein A precursor                                        |
| G2583_0797             | ECs0672 | Z0780  | mrdB | rod shape-determining protein RodA                                  |
| G2583_0798             | ECs0673 | Z0781  | mrDA | Penicillin-binding protein 2                                        |
| G2583_0799             | ECs0674 | Z0782  | ybeA | UPF0247 protein ybeA                                                |
| G2583_0800             | ECs0675 | Z0783  | ybeB | hypothetical protein                                                |
| G2583_0801             | ECs0676 | Z0785  | cobC | Alpha-ribazole phosphatase                                          |
| G2583_0802             | ECs0677 | Z0786  | nadD | Nicotinate-nucleotide adenylyltransferase                           |
| G2583_0803             | ECs0678 | Z0787  | holA | DNA polymerase III, delta subunit                                   |
| G2583_0804             | ECs0679 | Z0788  | rlpB | LPS-assembly lipoprotein rlpB precursor                             |
| G2583_0805             | ECs0680 | Z0789  | leuS | Leucyl-tRNA synthetase                                              |
| G2583_0806             | ECs0681 | Z0790  | ybeL | hypothetical protein                                                |
| G2583_0807             | ECs0682 | Z0791  | ybeQ | FOG: TPR repeat, SEL1 subfamily                                     |
| G2583_0807             |         | Z0793  | ybeQ | FOG: TPR repeat, SEL1 subfamily                                     |
| G2583_0808             | ECs0683 | Z0794  | ybeR | hypothetical protein                                                |
| G2583_0809             | ECs0684 | Z0795  | djlB | DnaJ domain protein                                                 |
| G2583_0810             | ECs0685 | Z0796  | ybeT | Sel1 domain protein repeat-containing protein                       |
| G2583_0811             | ECs0686 | Z0797  | ybeU | putative tRNA ligase                                                |
| G2583_0812             | ECs0687 |        | ybeV | DnaJ domain protein                                                 |
| G2583_0812             | ECs0688 |        | ybeV | DnaJ domain protein                                                 |

Table S10. The orthologue table of the O55 and O157 strains Page 22

| Locus_tag <sup>a</sup> |         |        | Gene | Product                                                     |
|------------------------|---------|--------|------|-------------------------------------------------------------|
| CB9615                 | Sakai   | EDL933 |      |                                                             |
| G2583_0813             | ECs0689 | Z0800  | hscC | DnaK family protein HscC                                    |
| G2583_0814             | ECs0690 | Z0801  | rihA | Pyrimidine-specific ribonucleoside hydrolase rihA           |
| G2583_0815             | ECs0691 | Z0802  | gltL | Glutamate/aspartate transport ATP-binding protein gltL      |
| G2583_0816             | ECs0692 | Z0803  | gltK | Glutamate/aspartate transport system permease protein gltK  |
| G2583_0817             | ECs0693 | Z0804  | gltJ | Glutamate/aspartate ABC transporter, permease protein GltJ  |
| G2583_0818             |         |        | sroC | ncRNA                                                       |
| G2583_0819             | ECs0694 | Z0805  | gltI | Glutamate/aspartate periplasmic binding protein             |
| G2583_0820             | ECs0695 | Z0806  | Int  | Apolipoprotein N-acyltransferase                            |
| G2583_0821             | ECs0696 | Z0807  | ybeX | Magnesium and cobalt efflux protein corC                    |
| G2583_0822             | ECs0697 | Z0808  | ybeY | conserved hypothetical protein                              |
| G2583_0823             | ECs0698 | Z0809  | ybeZ | PhoH family protein                                         |
| G2583_0824             | ECs0699 | Z0810  | miaB | UPF0004 protein yleA                                        |
| G2583_0825             | ECs0700 | Z0811  | ubiF | 2-octaprenyl-3-methyl-6-methoxy-1,4-benzoquinol hydroxylase |
| G2583_0826             | ECs0701 |        | -    | hypothetical protein                                        |
| G2583_0827             | glnX    | RNA012 | glnX | Gln tRNA                                                    |
| G2583_0828             | glnV    | RNA013 | glnV | Gln tRNA                                                    |
| G2583_0829             | metU    | RNA014 | metU | Met tRNA                                                    |
| G2583_0830             | ECs0702 |        | -    | Putative RNA                                                |
| G2583_0831             | glnW    | RNA015 | glnW | Gln tRNA                                                    |
|                        | ECs0703 |        | -    | putative RNA                                                |
| G2583_0832             | glnU    | RNA016 | glnU | Gln tRNA                                                    |
| G2583_0833             | leuW    | RNA017 | leuW | Leu tRNA                                                    |
| G2583_0834             | metT    | RNA018 | metT | Met tRNA                                                    |
| G2583_0835             | ECs0704 | Z0821  | asnB | Asparagine synthase                                         |
| G2583_0836             | ECs0705 | Z0822  | nagD | UMP phosphatase                                             |
| G2583_0837             | ECs0706 | Z0823  | nagC | N-acetylglucosamine repressor                               |
| G2583_0838             | ECs0707 | Z0824  | nagA | N-acetylglucosamine-6-phosphate deacetylase                 |
| G2583_0839             | ECs0708 | Z0825  | nagB | Glucosamine-6-phosphate deaminase                           |
| G2583_0840             | ECs0709 | Z0826  | nagE | PTS system, N-acetylglucosamine-specific IICBA component    |
| G2583_0841             | ECs0710 | Z0827  | glnS | Glutaminyl-tRNA synthetase                                  |
| G2583_0842             | ECs0711 | Z0828  | ybfM | Outer membrane porin, OprD family                           |
| G2583_0842             | ECs0712 | Z0829  | ybfM | Outer membrane porin, OprD family                           |
| G2583_0843             | ECs0713 | Z0830  | ybfN | hypothetical protein                                        |
| G2583_0844             | ECs0714 | Z0831  | fur  | Ferric uptake regulation protein                            |
| G2583_0845             | ECs0715 | Z0832  | fldA | Flavodoxin                                                  |
| G2583_0846             | ECs0716 | Z0834  | ybfE | CopG domain protein DNA-binding domain protein              |
| G2583_0847             | ECs0717 | Z0835  | ybfF | Esterase YbfF                                               |
| G2583_0848             | ECs0718 | Z0836  | seqA | Negative modulator of initiation of replication             |
| G2583_0849             | ECs0719 | Z0837  | pgm  | Phosphoglucomutase                                          |
| G2583_0850             | ECs0720 | Z0838  | potE | Putrescine-ornithine antiporter                             |

Table S10. The orthologue table of the O55 and O157 strains Page 23

| Locus_tag <sup>a</sup> |          |        | Gene | Product                                                                                                                     |
|------------------------|----------|--------|------|-----------------------------------------------------------------------------------------------------------------------------|
| CB9615                 | Sakai    | EDL933 |      |                                                                                                                             |
| G2583_0851             | ECs0721  | Z0839  | speF | Ornithine decarboxylase, inducible                                                                                          |
|                        |          | Z0840  | -    | hypothetical protein                                                                                                        |
| G2583_0852             | ECs0722  | Z0841  | kdpE | KDP operon transcriptional regulatory protein KdpE                                                                          |
| G2583_0853             | ECs0723  | Z0842  | kdpD | sensor protein KdpD                                                                                                         |
| G2583_0854             | ECs0724  | Z0843  | kdpC | Potassium-transporting ATPase C chain                                                                                       |
| G2583_0855             | ECs0725  | Z0844  | kdpB | Potassium-transporting ATPase B chain                                                                                       |
| G2583_0856             | ECs0726  | Z0845  | kdpA | Potassium-transporting ATPase A chain                                                                                       |
| G2583_0857             | ECs0727  |        | kdpF | K <sup>+</sup> -transporting ATPase, F subunit                                                                              |
| G2583_0858             | ECs0728  | Z0846  | ybfA | hypothetical protein                                                                                                        |
| G2583_0859             | ECs0729  | Z0847  | rhcC | RHS repeat protein                                                                                                          |
| Indel-20               | Indel-20 | Z0848  | -    | rhcC protein in rhs element                                                                                                 |
| Indel-20               | Indel-20 | Z0849  | ybfB | orf, hypothetical protein                                                                                                   |
| G2583_0859             | ECs0729  | Z0851  | rhcC | RHS repeat protein                                                                                                          |
| G2583_0860             | ECs0730  | Z0853  | ybfC | hypothetical protein                                                                                                        |
|                        |          | Z0855  | -    | hypothetical protein                                                                                                        |
| G2583_0861             |          | Z0856  | yhhl | Transposase IS4 family protein                                                                                              |
| G2583_0861             | ECs0731  | Z0854  | yhhl | Transposase IS4 family protein                                                                                              |
| G2583_0862             | ECs0732  | Z0858  | ybgA | hypothetical protein                                                                                                        |
| G2583_0863             | ECs0733  | Z0859  | phr  | Deoxyribodipyrimidine photolyase                                                                                            |
| G2583_0864             | ECs0734  | Z0860  | ybgH | Amino acid/peptide transporter                                                                                              |
| G2583_0865             | ECs0735  | Z0861  | ybgI | NIF3 family protein                                                                                                         |
| G2583_0866             | ECs0736  | Z0862  | ybgJ | putative carboxylase                                                                                                        |
| G2583_0867             | ECs0737  | Z0863  | ybgK | Putative carboxylase                                                                                                        |
| G2583_0868             | ECs0738  | Z0864  | ybgL | UPF0271 protein ybgL                                                                                                        |
| G2583_0869             | ECs0739  | Z0865  | nei  | Endonuclease VIII (DNA glycosylase/AP lyase Nei)                                                                            |
| G2583_0870             | ECs0740  | Z0867  | abrB | Putative transport protein                                                                                                  |
| G2583_0871             | ECs0741  | Z0868  | ybgO | hypothetical protein                                                                                                        |
| G2583_0872             | ECs0742  | Z0869  | ybgP | Periplasmic pilus chaperone family protein                                                                                  |
| G2583_0873             | ECsp001  | Z0870  | ybgQ | truncated outer membrane protein                                                                                            |
| G2583_0873             | ECs0743  | Z0871  | ybgQ | truncated outer membrane protein                                                                                            |
| G2583_0874             | ECs0744  | Z0872  | ybgD | Putative fimbrial-like protein                                                                                              |
| G2583_0875             | ECs0745  | Z0873  | gltA | Citrate (Si)-synthase                                                                                                       |
| G2583_0876             | ECs0746  | Z0875  | sdhC | Succinate dehydrogenase cytochrome b-556 subunit                                                                            |
| G2583_0877             | ECs0747  | Z0876  | sdhD | Succinate dehydrogenase hydrophobic membrane anchor subunit                                                                 |
| G2583_0878             | ECs0748  | Z0877  | sdhA | Succinate dehydrogenase flavoprotein subunit                                                                                |
| G2583_0879             | ECs0749  | Z0878  | sdhB | Succinate dehydrogenase, iron-sulfur subunit                                                                                |
| G2583_0880             | ECs0750  | Z0879  | -    | hypothetical protein                                                                                                        |
| G2583_0881             | ECs0751  | Z0880  | sucA | 2-oxoglutarate dehydrogenase E1 component                                                                                   |
| G2583_0882             | ECs0752  | Z0881  | sucB | Dihydrolipoyllysine-residue succinyltransferase, E2 component of oxoglutarate dehydrogenase (Succinyl-transferring) complex |
| G2583_0883             | ECs0753  | Z0882  | sucC | Succinyl-CoA ligase [ADP-forming] subunit beta                                                                              |
| G2583_0884             | ECs0754  | Z0883  | sucD | Succinyl-CoA ligase [ADP-forming] subunit alpha                                                                             |

Table S10. The orthologue table of the O55 and O157 strains Page 24

| Locus_tag <sup>a</sup> |         |        | Gene | Product                                                    |
|------------------------|---------|--------|------|------------------------------------------------------------|
| CB9615                 | Sakai   | EDL933 |      |                                                            |
| G2583_0885             |         | Z0884  | -    | conserved domain protein                                   |
| G2583_0886             | ECs0755 | Z0885  | -    | putative LysR-like transcriptional regulator               |
| G2583_0887             | ECs0756 | Z0886  | cobO | Cob(I)yrinic acid a,c-diamide adenosyltransferase          |
| G2583_0888             | ECs0757 | Z0887  | fumA | Hydro-lyase, Fe-S type, tartrate/fumarate family           |
| G2583_0889             | ECs0758 | Z0888  | -    | Transporter, dicarboxylate/amino acid:cation family        |
| G2583_0890             | ECs0759 | Z0890  | -    | hypothetical protein                                       |
| G2583_0891             | ECs0760 | Z0891  | -    | hypothetical protein                                       |
| G2583_0892             | ECs0761 | Z0892  | -    | Putative methylaspartate ammonia-lyase                     |
| G2583_0893             | ECs0762 | Z0893  | mutE | Methylaspartate mutase, E subunit                          |
| G2583_0894             | ECs0763 | Z0894  | -    | Putative glutamate mutase mutL                             |
| G2583_0895             | ECs0764 | Z0895  | mamA | Methylaspartate mutase S chain                             |
| G2583_0896             | ECs0765 | Z0896  | -    | hypothetical protein                                       |
| G2583_0897             | ECs0766 | Z0897  | -    | hypothetical protein                                       |
| G2583_0898             | ECs0767 | Z0898  | -    | hypothetical protein                                       |
|                        |         | Z0899  | -    | hypothetical protein                                       |
| G2583_0899             | ECs0768 | Z0900  | cydA | Cytochrome d ubiquinol oxidase subunit 1                   |
| G2583_0900             | ECs0769 | Z0901  | cydB | Cytochrome d ubiquinol oxidase subunit 2                   |
| G2583_0901             |         |        | ybgT | hypothetical protein                                       |
| G2583_0902             | ECs0770 | Z0903  | ybgE | hypothetical protein                                       |
| G2583_0903             | ECs0771 | Z0904  | ybgC | Putative esterase YbgC                                     |
| G2583_0904             | ECs0772 | Z0905  | tolQ | Inner membrane protein                                     |
| G2583_0905             | ECs0773 | Z0906  | tolR | hypothetical protein                                       |
| G2583_0906             | ECs0774 | Z0907  | tolA | TolA colicin import membrane protein                       |
| G2583_0907             | ECs0775 | Z0908  | tolB | Protein tolB precursor                                     |
| G2583_0908             | ECs0776 | Z0909  | pal  | Peptidoglycan-associated lipoprotein precursor             |
| G2583_0909             | ECs0777 | Z0910  | ybgF | Tol-pal system protein YbgF                                |
| G2583_0910             | lysT    | RNA019 | lysT | Lys tRNA                                                   |
| G2583_0911             | valT    | RNA020 | valT | Val tRNA                                                   |
| G2583_0912             | lysW    | RNA021 | lysW | Lys tRNA                                                   |
| G2583_0913             | valZ    | RNA022 | valZ | Val tRNA                                                   |
| G2583_0914             | lysY    | RNA023 | lysY | Lys tRNA                                                   |
| G2583_0915             | lysZ    | RNA024 | lysZ | Lys tRNA                                                   |
| G2583_0916             | ECs0778 | Z0919  | nadA | Quinolinate synthetase A                                   |
| G2583_0917             | ECs0779 | Z0920  | pnuC | Nicotinamide mononucleotide transporter PnuC               |
| G2583_0918             | ECs0780 | Z0922  | zitB | Zinc transporter zitB                                      |
| G2583_0919             | ECs0781 | Z0923  | ybgS | hypothetical protein                                       |
| G2583_0920             | ECs0782 | Z0924  | aroG | Phospho-2-dehydro-3-deoxyheptonate aldolase, Phe-sensitive |
| G2583_0921             | ECs0783 | Z0925  | gpmA | 2,3-bisphosphoglycerate-dependent phosphoglycerate mutase  |
| G2583_0922             | ECs0784 | Z0926  | galM | Galactose mutarotase                                       |
| G2583_0923             | ECs0785 | Z0927  | galK | Galactokinase                                              |
| G2583_0924             | ECs0786 | Z0928  | galT | Galactose-1-phosphate uridylyltransferase                  |
| G2583_0925             | ECs0787 | Z0929  | galE | UDP-galactose-4-epimerase                                  |



Table S10. The orthologue table of the O55 and O157 strains Page 25

| Locus_tag <sup>a</sup> |          |          | Gene | Product                                                          |
|------------------------|----------|----------|------|------------------------------------------------------------------|
| CB9615                 | Sakai    | EDL933   |      |                                                                  |
| G2583_0926             | ECs0788  | Z0930    | modF | ABC transporter, ATP-binding protein                             |
| G2583_0927             | ECs0789  | Z0931    | modE | transcriptional regulator ModE                                   |
| G2583_0928             | ECs0790  | Z0932    | ybhT | hypothetical protein                                             |
| G2583_0929             | ECs0791  | Z0933    | modA | Molybdate ABC transporter, periplasmic molybdate-binding protein |
| G2583_0930             | ECs0792  | Z0934    | modB | ABC-type molybdate transport system, permease component          |
| G2583_0931             | ECs0793  | Z0935    | modC | Molybdenum import ATP-binding protein modC                       |
| G2583_0932             | ECs0794  | Z0936    | ybhA | Phosphatase YbhA                                                 |
| G2583_0933             | ECs0795  | Z0938    | pgl  | 6-phosphogluconolactonase                                        |
| G2583_0934             | ECs0796  | Z0939    | ybhD | putative transcriptional regulator LYSR-type                     |
| G2583_0935             | ECs0797  | Z0940    | ybhH | hypothetical protein                                             |
| G2583_0936             | ECs0798  | Z0941    | ybhI | Anion transporter                                                |
| G2583_0937             | ECs0799  | Z0942    | ybhJ | aconitase family protein                                         |
| G2583_0938             | ECs0800  | Z0943    | ybhC | Pectinesterase                                                   |
| G2583_0939             | ECsp002  | Z0946    | intE | Phage integrase family                                           |
| G2583_0940             | ECs0801  |          | -    | Excisionase                                                      |
| G2583_0941             | ECs0802  | Z0947    | -    | unknown protein encoded by prophage CP-933K                      |
|                        | ECs0803  |          | -    | hypothetical protein                                             |
| G2583_0942             | ECs0804  | Z0948    | -    | unknown protein encoded by prophage CP-933K                      |
| G2583_0943             | ECs0805  |          | -    | hypothetical C4-type zinc finger protein TraR-family             |
| G2583_0944             | ECs0806  | Z0949    | -    | hypothetical protein                                             |
| G2583_0945             | ECs0807  | Z0950    | -    | unknown protein encoded by prophage CP-933K                      |
|                        | ECs0808  |          | -    | hypothetical protein                                             |
| G2583_0946             | ECs0809  | Z0951    | -    | Exonuclease                                                      |
| G2583_0947             | ECsp003  | Z0952    | bet  | Bacteriophage recombination protein                              |
| G2583_0948             | Indel-24 | Indel-24 | gamW | Gam protein                                                      |
| G2583_0949             | Indel-24 | Indel-24 | CIII | antitermination protein                                          |
| G2583_0950             | Indel-24 | Indel-24 | -    | Lambda prophage-derived protein ea10                             |
| G2583_0951             | Indel-24 | Indel-24 | -    | Gene 34 protein                                                  |
| G2583_0952             | Indel-24 | Indel-24 | -    | N protein                                                        |
| G2583_0953             | Indel-24 | Indel-24 | -    | Hypothetical protein                                             |
| G2583_0954             | Indel-24 | Indel-24 | -    | CI protein                                                       |
| G2583_0955             | Indel-24 | Indel-24 | CRO  | hypothetical protein                                             |
| G2583_0956             | Indel-24 | Indel-24 | -    | regulatory protein CII                                           |
| G2583_0957             | Indel-24 | Indel-24 | -    | hypothetical protein                                             |
| G2583_0958             | Indel-24 | Indel-24 | -    | putative replication protein P of bacteriophage BP-933W          |
| G2583_0959             | Indel-24 | Indel-24 | -    | Ren protein                                                      |
| G2583_0960             | Indel-24 | Indel-24 | ninB | Unknown protein encoded within prophage                          |
| G2583_0961             | ECs0810  |          | ninE | NinE protein                                                     |
| G2583_0962             | ECs0811  |          | NinF | hypothetical protein                                             |
| G2583_0963             | ECs0812  | Z0953    | NinG | Bacteriophage Lambda NinG protein                                |
| G2583_0964             | ECs0813  | Z0954    | -    | Serine/threonine-protein phosphatase 1                           |
| G2583_0965             | ECs0814  | Z0955    | -    | Putative outer membrane protein                                  |

Table S10. The orthologue table of the O55 and O157 strains Page 26

| Locus_tag <sup>a</sup> |         |        | Gene | Product                                                              |
|------------------------|---------|--------|------|----------------------------------------------------------------------|
| CB9615                 | Sakai   | EDL933 |      |                                                                      |
| G2583_0966             | ECs0815 | Z0956  | -    | Putative antiterminator Q protein of prophage CP-933K                |
| G2583_0967             | ECs0816 | Z0957  | -    | unknown protein encoded by prophage CP-933K                          |
| G2583_0968             |         | Z0958  | -    | unknown protein encoded by prophage CP-933K                          |
|                        | ECs0817 |        | -    | hypothetical protein                                                 |
|                        |         | Z0959  | -    | unknown protein encoded by prophage CP-933K                          |
| G2583_0969             | ECs0818 |        | -    | Putative holin protein                                               |
| G2583_0970             | ECs0819 | Z0960  | ybcS | putative lysozyme protein R of prophage CP-933K                      |
| G2583_0971             | ECs0820 | Z0961  | -    | Bacteriophage lysis protein                                          |
|                        | ECs0821 |        | -    | putative lipoprotein Rz1 precursor                                   |
| G2583_0972             | ECs0822 |        | -    | hypothetical protein                                                 |
| G2583_0973             | ECs0823 |        | -    | hypothetical protein                                                 |
|                        |         | Z0962  | -    | unknown protein encoded by prophage CP-933K                          |
| G2583_0974             | ECs0824 | Z0963  | -    | unknown protein encoded by prophage CP-933K                          |
| G2583_0975             | ECs0825 | Z0964  | -    | Phage terminase large subunit                                        |
| G2583_0976             | ECs0826 |        | -    | hypothetical protein                                                 |
| G2583_0977             | ECs0827 | Z0965  | -    | Putative capsid protein                                              |
| G2583_0977             | ECs0828 | Z0966  | -    | Putative capsid protein                                              |
| G2583_0978             | ECs0829 | Z0967  | clpP | Clp protease domain protein                                          |
| G2583_0979             | ECs0830 | Z0968  | -    | hypothetical protein                                                 |
| G2583_0980             | ECs0831 | Z0969  | -    | unknown protein encoded by prophage CP-933K                          |
| G2583_0981             | ECs0832 | Z0970  | -    | prophage minor tail protein Z                                        |
| G2583_0982             | ECs0833 | Z0971  | -    | putative tail component of prophage CP-933K                          |
| G2583_0983             | ECs0834 | Z0972  | -    | Putative tail component of prophage CP-933K                          |
| G2583_0984             | ECs0835 | Z0973  | -    | ATPase components of ABC transporters with duplicated ATPase domains |
| G2583_0985             | ECs0836 | Z0974  | -    | Putative tail component of prophage                                  |
| G2583_0986             | ECs0837 | Z0975  | -    | Putative tail component of prophage CP-933K                          |
| G2583_0987             | ECs0838 | Z0976  | -    | putative minor tail protein                                          |
| G2583_0988             | ECs0839 | Z0977  | -    | putative minor tail protein                                          |
| G2583_0989             | ECs0840 | Z0978  | -    | Putative tail fiber component K of prophage                          |
| G2583_0990             | ECs0841 | Z0979  | -    | Putative tail component of prophage CP-933K                          |
| G2583_0991             | ECs0842 | Z0980  | -    | Host specificity protein J                                           |
| G2583_0992             | ECs0843 | Z0981  | -    | Enterobacterial Ail/Lom family protein                               |
| G2583_0993             | ECs0844 | Z0982  | -    | hypothetical protein                                                 |
| G2583_0994             | ECs0845 | Z0984  | -    | putative prophage tail fibre C-terminus family protein               |
| G2583_0995             | ECs0846 | Z0985  | nleB | NleB                                                                 |
| G2583_0996             | ECs0847 | Z0986  | nleC | Non-LEE encoded type III effector C                                  |
| G2583_0997             | ECsp004 |        | -    | tail fiber assembly proteins                                         |
| G2583_0998             | ECs0848 | Z0989  | nleH | non-LEE-encoded type III effector H                                  |
| G2583_0999             | ECs0849 |        | -    | hypothetical protein                                                 |
| G2583_1000             | ECs0850 | Z0990  | nleD | hypothetical protein                                                 |
| G2583_1001             | ECs0851 | Z0992  | ybhB | UPF0098 protein ybhB                                                 |
| G2583_1002             | ECs0852 | Z0993  | bioA | Adenosylmethionine-8-amino-7-oxononanoate transaminase               |

Table S10. The orthologue table of the O55 and O157 strains Page 27

| Locus_tag <sup>a</sup> |         |        | Gene | Product                                                                   |
|------------------------|---------|--------|------|---------------------------------------------------------------------------|
| CB9615                 | Sakai   | EDL933 |      |                                                                           |
| G2583_1003             | ECs0853 | Z0994  | bioB | Biotin synthase                                                           |
| G2583_1004             | ECs0854 | Z0995  | bioF | 8-amino-7-oxononanoate synthase                                           |
| G2583_1005             | ECs0855 | Z0996  | bioC | Biotin biosynthesis protein BioC                                          |
| G2583_1006             | ECs0856 | Z0997  | bioD | Dethiobiotin synthase                                                     |
| G2583_1007             | ECs0857 | Z0998  | uvrB | UvrABC system protein B                                                   |
| G2583_1008             | ECs0858 | Z0999  | ybhK | hypothetical protein                                                      |
| G2583_1009             | ECs0859 | Z1000  | moaA | Molybdenum cofactor biosynthesis protein A                                |
| G2583_1010             | ECs0860 | Z1001  | moaB | Molybdenum cofactor biosynthesis protein B                                |
| G2583_1011             | ECs0861 | Z1002  | moaC | Molybdenum cofactor biosynthesis protein C                                |
| G2583_1012             | ECs0862 | Z1003  | moaD | Molybdopterin biosynthesis                                                |
| G2583_1013             | ECs0863 | Z1004  | moaE | Molybdopterin converting factor, subunit 2                                |
| G2583_1014             | ECs0864 | Z1005  | ybhL | hypothetical protein                                                      |
| G2583_1015             | ECs0865 | Z1006  | ybhM | hypothetical protein                                                      |
| G2583_1016             | ECs0866 | Z1007  | ybhN | hypothetical protein                                                      |
| G2583_1017             | ECs0867 | Z1008  | ybhO | Putative cardiolipin synthetase ybhO                                      |
| G2583_1018             | ECs0868 | Z1009  | ybhP | hypothetical protein                                                      |
| G2583_1019             | ECs0869 | Z1010  | ybhQ | Inner membrane protein ybhQ                                               |
| G2583_1020             | ECs0870 | Z1012  | ybhR | hypothetical protein                                                      |
| G2583_1021             | ECs0871 | Z1013  | ybhS | ABC-2 type transporter, permease protein                                  |
| G2583_1022             | ECs0872 | Z1014  | ybhF | Putative ATP-binding component of a transport system                      |
| G2583_1023             | ECs0873 | Z1015  | ybhG | UPF0194 membrane protein ybhG precursor                                   |
| G2583_1024             | ECs0874 | Z1016  | ybiH | Hypothetical transcriptional regulator ybiH                               |
| G2583_1025             | ECs0875 | Z1017  | rhIE | ATP-dependent RNA helicase RhIE                                           |
|                        |         | Z1018  | -    | hypothetical protein                                                      |
| G2583_1026             | ECs0876 | Z1019  | sopA | hypothetical protein                                                      |
| G2583_1027             | ECs0877 | Z1020  | dinG | ATP-dependent DNA helicase DinG                                           |
| G2583_1028             | ECs0878 | Z1021  | ybiB | Glycosyl transferase family protein                                       |
| G2583_1029             | ECs0879 | Z1022  | ybiC | Uncharacterized oxidoreductase ybiC                                       |
| G2583_1030             | ECs0880 | Z1023  | ybiJ | hypothetical protein                                                      |
| G2583_1031             | ECs0881 | Z1024  | ybiI | C4-type zinc finger protein, DksA/TraR family                             |
| G2583_1032             | ECs0882 | Z1025  | ybiX | Putative enzyme                                                           |
| G2583_1033             | ECs0883 | Z1026  | fiu  | Catecholate siderophore receptor fiu precursor                            |
| G2583_1034             | ECs0884 | Z1027  | ybiM | hypothetical protein                                                      |
| G2583_1035             | ECs0885 | Z1028  | ybiN | hypothetical protein                                                      |
| G2583_1036             | ECs0886 | Z1030  | ybiO | Transporter, small conductance mechanosensitive ion channel (MscS) family |
| G2583_1037             | ECs0887 | Z1031  | glnQ | Glutamine ABC transporter, ATP-binding protein                            |
| G2583_1038             | ECs0888 | Z1032  | glnP | Glutamine transport system permease protein glnP                          |
| G2583_1039             | ECs0889 | Z1033  | glnH | hypothetical protein                                                      |
| G2583_1040             | ECs0890 | Z1034  | dps  | Global regulator, starvation conditions                                   |
| G2583_1041             | ECs0891 | Z1035  | rhtA | Inner membrane transporter rhtA                                           |
| G2583_1042             | ECs0892 | Z1036  | ompX | Outer membrane protein X precursor                                        |
| G2583_1043             | ECs0893 | Z1037  | ybiP | Sulfatase family protein                                                  |
| G2583_1044             |         | Z1038  | yliL | hypothetical protein                                                      |

Table S10. The orthologue table of the O55 and O157 strains Page 28

| Locus_tag <sup>a</sup> |         |        | Gene | Product                                                   |
|------------------------|---------|--------|------|-----------------------------------------------------------|
| CB9615                 | Sakai   | EDL933 |      |                                                           |
| G2583_1045             | ECs0894 | Z1039  | mntR | manganese transport regulator MntR                        |
| G2583_1046             | ECs0895 | Z1040  | ybiR | Citrate transporter family protein                        |
| G2583_1047             | ECs0896 | Z1041  | ybiS | hypothetical protein                                      |
| G2583_1048             | ECs0897 | Z1042  | ybiT | Uncharacterized ABC transporter ATP-binding protein ybiT  |
| G2583_1049             | ECs0898 | Z1043  | ybiU | hypothetical protein                                      |
| G2583_1050             | ECs0899 | Z1044  | ybiV | Sugar phosphatase SupH                                    |
| G2583_1051             | ECs0900 | Z1045  | ybiW | Pyruvate-formate lyase                                    |
| G2583_1051             | ECs0901 | Z1046  | ybiW | Pyruvate-formate lyase                                    |
| G2583_1052             | ECs0902 | Z1047  | ybiY | Glycyl-radical enzyme activating protein family           |
| G2583_1053             | ECs0903 | Z1048  | fsaA | Fructose-6-phosphate aldolase 1                           |
| G2583_1054             | ECs0904 | Z1049  | moeB | Molybdopterin biosynthesis                                |
| G2583_1055             | ECs0905 | Z1050  | moeA | Molybdopterin biosynthesis protein MoeA                   |
| G2583_1056             | ECs0906 | Z1051  | iaaA | Putative asparaginase                                     |
| G2583_1056             | ECs0907 | Z1052  | iaaA | Putative asparaginase                                     |
| G2583_1057             | ECs0908 | Z1053  | gsiA | Glutathione ABC transporter, ATP-binding protein GsiA     |
| G2583_1058             | ECs0909 | Z1054  | gsiB | Glutathione-binding protein gsiB precursor                |
| G2583_1059             | ECs0910 | Z1055  | gsiC | Glutathione transport system permease protein gsiC        |
| G2583_1060             | ECs0911 | Z1056  | gsiD | Glutathione transport system permease protein gsiD        |
| G2583_1061             | ECs0912 | Z1057  | yliE | cyclic diguanylate phosphodiesterase (EAL) domain protein |
| G2583_1062             | ECs0913 | Z1058  | ylif | Uncharacterized membrane protein yliF                     |
|                        | ECs0914 |        | -    | hypothetical membrane protein                             |
| G2583_1063             |         | Z1059  | -    | Helix-turn-helix DNA-binding domain protein               |
| G2583_1064             |         | Z1060  | -    | hypothetical protein                                      |
| G2583_1065             | ECs0915 | Z1061  | yliG | UPF0004 protein yliG                                      |
| G2583_1066             | ECs0916 | Z1062  | bssR | Biofilm regulator bssR                                    |
| G2583_1067             | ECs0917 | Z1063  | ylil | Glucose / sorbosone dehydrogenase protein                 |
| G2583_1068             | ECs0918 | Z1064  | ylj  | putative transferase                                      |
| G2583_1069             | ECs0919 | Z1066  | dacC | Penicillin-binding protein 6                              |
| G2583_1070             | ECs0920 | Z1067  | deoR | Deoxyribose operon repressor                              |
| G2583_1071             | ECs0921 | Z1068  | ybjG | Undecaprenyl-diphosphatase                                |
| G2583_1072             | ECs0922 | Z1069  | cmr  | Multidrug translocase MdfA                                |
| G2583_1073             | ECs0923 | Z1070  | ybjH | hypothetical protein                                      |
| G2583_1074             | ECs0924 | Z1071  | ybjl | Cof-like hydrolase                                        |
| G2583_1075             | ECs0925 | Z1072  | ybjJ | putative DEOR-type transcriptional regulator              |
| G2583_1076             | ECs0926 | Z1073  | ybjK | putative DEOR-type transcriptional regulator              |
| G2583_1077             |         |        | rybB | ncRNA                                                     |
| G2583_1078             | ECs0927 | Z1074  | ybjL | Putative transport protein ybjL                           |
| G2583_1079             | ECs0928 | Z1075  | ybjM | Inner membrane protein ybjM                               |
| G2583_1080             | ECs0929 | Z1076  | grxA | Glutaredoxin 1                                            |
| G2583_1081             | ECs0930 | Z1077  | ybjC | hypothetical protein                                      |
| G2583_1082             | ECs0931 | Z1078  | nfsA | Oxygen-insensitive NADPH nitroreductase                   |
| G2583_1083             | ECs0932 | Z1079  | rimK | Ribosomal protein S6 modification protein                 |

Table S10. The orthologue table of the O55 and O157 strains Page 29

| Locus_tag <sup>a</sup> |          |        | Gene | Product                                                             |
|------------------------|----------|--------|------|---------------------------------------------------------------------|
| CB9615                 | Sakai    | EDL933 |      |                                                                     |
| G2583_1084             | ECs0933  | Z1080  | ybjN | Putative sensory transduction regulator                             |
| G2583_1085             |          |        | potF | Putrescine ABC transporter, periplasmic putrescine-binding protein  |
| G2583_1085             | ECs0934  | Z1081  | potF | Putrescine ABC transporter, periplasmic putrescine-binding protein  |
| G2583_1086             | ECs0935  | Z1082  | potG | Putrescine transport ATP-binding protein PotG                       |
| G2583_1087             | ECs0936  | Z1083  | potH | Putrescine transport protein                                        |
| G2583_1088             | ECs0937  | Z1084  | potI | Putrescine ABC transporter, permease protein PotI                   |
| G2583_1089             | ECs0938  | Z1085  | ybjO | Inner membrane protein ybjO                                         |
| G2583_1090             | ECs0939  | Z1086  | rumB | 23S rRNA (uracil-5-)-methyltransferase rumB                         |
| G2583_1091             | ECs0940  | Z1087  | ulaA | Ascorbate-specific PTS system enzyme IIC                            |
| G2583_1092             | ECs0941  | Z1088  | -    | hypothetical protein                                                |
| G2583_1093             | ECs0942  | Z1089  | -    | putative sulfatase                                                  |
| G2583_1094             | ECs0943  | Z1090  | artJ | Arginine 3rd transport system periplasmic binding                   |
| G2583_1095             | ECs0944  | Z1091  | artM | Arginine transport system permease protein artM                     |
| G2583_1096             | ECs0945  | Z1092  | artQ | Arginine ABC transporter, permease protein ArtQ                     |
| G2583_1097             | ECs0946  | Z1093  | artI | Arginine ABC transporter, periplasmic arginine-binding protein ArtI |
| G2583_1098             | ECs0947  | Z1094  | artP | Arginine transport ATP-binding protein ArtP                         |
| G2583_1099             | ECs0948  | Z1095  | ybjP | Putative lipoprotein YbjP                                           |
| G2583_1100             |          | Z1096  | -    | hypothetical protein                                                |
| G2583_1101             | ECs0949  | Z1097  | -    | hypothetical protein                                                |
| G2583_1101             | ECs0950  | Z1098  | -    | hypothetical protein                                                |
| G2583_1102             | ECs0951  |        | -    | hypothetical protein                                                |
| G2583_1103             | ECs0952  | Z1099  | ybjQ | UPF0145 protein ybjQ                                                |
| G2583_1104             | ECs0953  | Z1100  | ybjR | N-acetylmuramoyl-L-alanine amidase AmiD                             |
| G2583_1105             | ECs0954  | Z1102  | ybjS | NAD dependent epimerase/dehydratase family                          |
| G2583_1106             | ECs0955  | Z1103  | ybjT | NAD dependent epimerase/dehydratase family protein                  |
| G2583_1107             | ECs0956  | Z1104  | ltaE | Low specificity L-threonine aldolase                                |
| G2583_1108             | ECs0957  | Z1105  | poxB | Pyruvate dehydrogenase                                              |
| G2583_1109             | ECs0958  | Z1106  | hcr  | NADH oxidoreductase hcr                                             |
| G2583_1110             | ECs0959  | Z1107  | hcp  | Hydroxylamine reductase                                             |
| G2583_1111             | ECs0960  | Z1108  | ybjE | Putative surface protein                                            |
| G2583_1112             | ECs0961  | Z1109  | aqpZ | Aquaporin Z                                                         |
| G2583_1113             | ECs0962  | Z1110  | ybjD | hypothetical protein                                                |
| G2583_1114             | ECs0963  | Z1112  | ybjX | putative enzyme                                                     |
| G2583_1115             | ECs0964  | Z1115  | macA | macrolide transporter subunit MacA                                  |
| G2583_1116             | ECs0965  | Z1116  | macB | Macrolide-specific ABC-type efflux carrier protein MacB             |
| G2583_1117             | ECs0966  | Z1117  | cspD | Cold shock proteins                                                 |
| G2583_1118             | ECs0967  | Z1118  | clpS | ATP-dependent Clp protease adapter protein clpS                     |
| G2583_1119             | ECs0968  | Z1119  | clpA | ATP-dependent clp protease ATP-binding subunit clpA                 |
| Indel-27               | Indel-27 | Z1120  | -    | putative P4-family integrase                                        |
| Indel-27               | Indel-27 | Z1121  | -    | hypothetical protein                                                |
| Indel-27               | Indel-27 | Z1122  | -    | hypothetical protein                                                |

Table S10. The orthologue table of the O55 and O157 strains Page 30

| Locus_tag <sup>a</sup> |          |        | Gene | Product                                               |
|------------------------|----------|--------|------|-------------------------------------------------------|
| CB9615                 | Sakai    | EDL933 |      |                                                       |
| Indel-27               | Indel-27 | Z1123  | -    | unknown in IS1N                                       |
| Indel-27               | Indel-27 | Z1124  | -    | putative prophage regulatory protein                  |
| Indel-27               | Indel-27 | Z1125  | -    | hypothetical protein                                  |
| Indel-27               | Indel-27 | Z1126  | -    | unknown                                               |
| Indel-27               | Indel-27 | Z1127  | -    | hypothetical protein                                  |
| Indel-27               | Indel-27 | Z1128  | -    | hypothetical protein                                  |
| Indel-27               | Indel-27 | Z1129  | -    | putative helicase                                     |
| Indel-27               | Indel-27 | Z1130  | -    | hypothetical protein                                  |
| Indel-27               | Indel-27 | Z1131  | -    | unknown protein encoded in ISEc8                      |
| Indel-27               | Indel-27 | Z1132  | -    | unknown protein encoded in ISEc8                      |
| Indel-27               | Indel-27 | Z1133  | -    | partial putative transposase                          |
| Indel-27               | Indel-27 | Z1134  | -    | unknown in IS600                                      |
| Indel-27               | Indel-27 | Z1135  | -    | putative complement resistance protein                |
| Indel-27               | Indel-27 | Z1136  | -    | hypothetical protein                                  |
| Indel-27               | Indel-27 | Z1137  | -    | hypothetical protein                                  |
| Indel-27               | Indel-27 | Z1138  | -    | hypothetical protein                                  |
| Indel-27               | Indel-27 | Z1139  | -    | putative diacylglycerol kinase                        |
| Indel-27               | Indel-27 | Z1140  | -    | unknown                                               |
| Indel-27               | Indel-27 | Z1141  | -    | hypothetical protein                                  |
| Indel-27               | Indel-27 | Z1142  | ureD | putative urease accessory protein D                   |
| Indel-27               | Indel-27 | Z1143  | ureA | putative urease structural subunit A (gamma)          |
| Indel-27               | Indel-27 | Z1144  | ureB | putative urease structural subunit B (beta)           |
| Indel-27               | Indel-27 | Z1145  | ureC | putative urease structural subunit C (alpha)          |
| Indel-27               | Indel-27 | Z1146  | ureE | putative urease accessory protein E                   |
| Indel-27               | Indel-27 | Z1147  | ureF | putative urease accessory protein F                   |
| Indel-27               | Indel-27 | Z1148  | ureG | putative urease accessory protein G                   |
| Indel-27               | Indel-27 | Z1149  | -    | hypothetical protein                                  |
| Indel-27               | Indel-27 | Z1150  | -    | unknown in IS                                         |
| Indel-27               | Indel-27 | Z1151  | -    | hypothetical protein                                  |
| Indel-27               | Indel-27 | Z1152  | -    | putative ribosomal protein                            |
| Indel-27               | Indel-27 | Z1153  | -    | hypothetical protein                                  |
| Indel-27               | Indel-27 | Z1154  | -    | hypothetical protein                                  |
| Indel-27               | Indel-27 | Z1155  | -    | hypothetical protein                                  |
| Indel-27               | Indel-27 | Z1156  | -    | hypothetical protein                                  |
| Indel-27               | Indel-27 | Z1157  | -    | hypothetical protein                                  |
| Indel-27               | Indel-27 | Z1158  | -    | unknown in ISEc8                                      |
| Indel-27               | Indel-27 | Z1159  | -    | unknown in ISEc8                                      |
| Indel-27               | Indel-27 | Z1160  | -    | unknown in ISEc8                                      |
| Indel-27               | Indel-27 | Z1161  | -    | unknown in ISEc8                                      |
| Indel-27               | Indel-27 | Z1162  | -    | unknown in ISEc8                                      |
| Indel-27               | Indel-27 | Z1163  | -    | unknown in ISEc8                                      |
| Indel-27               | Indel-27 | Z1164  | terW | unknown associated with putative tellurite resistance |
| Indel-27               | Indel-27 | Z1165  | -    | hypothetical protein                                  |
| Indel-27               | Indel-27 | Z1166  | -    | hypothetical protein                                  |

Table S10. The orthologue table of the O55 and O157 strains Page 31

| Locus_tag <sup>a</sup> |          |        | Gene | Product                                                                                |
|------------------------|----------|--------|------|----------------------------------------------------------------------------------------|
| CB9615                 | Sakai    | EDL933 |      |                                                                                        |
| Indel-27               | Indel-27 | Z1167  | -    | hypothetical protein                                                                   |
| Indel-27               | Indel-27 | Z1168  | -    | hypothetical protein                                                                   |
| Indel-27               | Indel-27 | Z1169  | -    | hypothetical protein                                                                   |
| Indel-27               | Indel-27 | Z1170  | -    | hypothetical protein                                                                   |
| Indel-27               | Indel-27 | Z1171  | terZ | putative phage inhibition, colicin resistance and tellurite resistance protein         |
| Indel-27               | Indel-27 | Z1172  | terA | putative phage inhibition, colicin resistance and tellurite resistance protein         |
| Indel-27               | Indel-27 | Z1173  | terB | putative phage inhibition, colicin resistance and tellurite resistance protein         |
| Indel-27               | Indel-27 | Z1174  | terC | putative phage inhibition, colicin resistance and tellurite resistance protein         |
| Indel-27               | Indel-27 | Z1175  | terD | putative phage inhibition, colicin resistance and tellurite resistance protein         |
| Indel-27               | Indel-27 | Z1176  | terE | putative phage inhibition, colicin resistance and tellurite resistance protein         |
| Indel-27               | Indel-27 | Z1177  | terF | partial putative phage inhibition, colicin resistance and tellurite resistance protein |
| Indel-27               | Indel-27 | Z1178  | -    | putative receptor                                                                      |
| Indel-27               | Indel-27 | Z1179  | -    | hypothetical protein                                                                   |
| Indel-27               | Indel-27 | Z1180  | -    | hypothetical protein                                                                   |
| Indel-27               | Indel-27 | Z1181  | -    | hypothetical protein                                                                   |
| Indel-27               | Indel-27 | Z1182  | -    | hypothetical protein                                                                   |
| Indel-27               | Indel-27 | Z1183  | -    | hypothetical protein                                                                   |
| Indel-27               | Indel-27 | Z1184  | -    | hypothetical protein                                                                   |
| Indel-27               | Indel-27 | Z1185  | -    | hypothetical protein                                                                   |
| Indel-27               | Indel-27 | Z1186  | -    | hypothetical protein                                                                   |
| Indel-27               | Indel-27 | Z1187  | -    | hypothetical protein                                                                   |
| Indel-27               | Indel-27 | Z1188  | -    | unknown                                                                                |
| Indel-27               | Indel-27 | Z1189  | -    | hypothetical protein                                                                   |
| Indel-27               | Indel-27 | Z1190  | -    | putative glucosyltransferase                                                           |
| Indel-27               | Indel-27 | Z1191  | -    | hypothetical protein                                                                   |
| Indel-27               | Indel-27 | Z1192  | -    | IS1 protein InsB                                                                       |
| Indel-27               | Indel-27 | Z1193  | -    | hypothetical protein                                                                   |
| Indel-27               | Indel-27 | Z1194  | -    | hypothetical protein                                                                   |
| Indel-27               | Indel-27 | Z1195  | -    | hypothetical protein                                                                   |
| Indel-27               | Indel-27 | Z1196  | -    | hypothetical protein                                                                   |
| Indel-27               | Indel-27 | Z1197  | -    | hypothetical protein                                                                   |
| Indel-27               | Indel-27 | Z1198  | -    | putative transposase                                                                   |
| Indel-27               | Indel-27 | Z1199  | -    | unknown in IS                                                                          |
| Indel-27               | Indel-27 | Z1200  | -    | hypothetical protein                                                                   |
| Indel-27               | Indel-27 | Z1201  | -    | hypothetical protein                                                                   |
| Indel-27               | Indel-27 | Z1202  | -    | hypothetical protein                                                                   |
| Indel-27               | Indel-27 | Z1203  | -    | unknown                                                                                |

Table S10. The orthologue table of the O55 and O157 strains Page 32

| Locus_tag <sup>a</sup> |          |        | Gene | Product                                                                                      |
|------------------------|----------|--------|------|----------------------------------------------------------------------------------------------|
| CB9615                 | Sakai    | EDL933 |      |                                                                                              |
| Indel-27               | Indel-27 | Z1204  | -    | unknown                                                                                      |
| Indel-27               | Indel-27 | Z1205  | -    | hypothetical protein                                                                         |
| Indel-27               | Indel-27 | Z1206  | -    | hypothetical protein                                                                         |
| Indel-27               | Indel-27 | Z1207  | -    | partial transposase                                                                          |
| Indel-27               | Indel-27 | Z1208  | -    | unknown in putative ISEc8                                                                    |
| Indel-27               | Indel-27 | Z1209  | -    | hypothetical protein                                                                         |
| Indel-27               | Indel-27 | Z1210  | -    | putative histone                                                                             |
| Indel-27               | Indel-27 | Z1211  | -    | putative adhesin                                                                             |
| Indel-27               | Indel-27 | Z1212  | -    | unknown                                                                                      |
| Indel-27               | Indel-27 | Z1213  | -    | unknown                                                                                      |
| Indel-27               | Indel-27 | Z1214  | -    | hypothetical protein                                                                         |
| Indel-27               | Indel-27 | Z1215  | -    | unknown                                                                                      |
| Indel-27               | Indel-27 | Z1216  | -    | unknown                                                                                      |
| Indel-27               | Indel-27 | Z1217  | -    | putative DNA repair protein, RADC family                                                     |
| Indel-27               | Indel-27 | Z1218  | -    | orf, hypothetical protein                                                                    |
| Indel-27               | Indel-27 | Z1219  | -    | hypothetical protein                                                                         |
| Indel-27               | Indel-27 | Z1220  | -    | putative structural protein                                                                  |
| Indel-27               | Indel-27 | Z1221  | -    | putative transposase                                                                         |
| Indel-27               | Indel-27 | Z1222  | -    | unknown in IS                                                                                |
| Indel-27               | Indel-27 | Z1223  | -    | hypothetical protein                                                                         |
| Indel-27               | Indel-27 | Z1225  | -    | hypothetical protein                                                                         |
| Indel-27               | Indel-27 | Z1226  | -    | unknown                                                                                      |
| G2583_1120             | serW     | RNA025 | serW | Ser tRNA                                                                                     |
| G2583_1121             | ECs0969  | Z1228  | infA | hypothetical protein                                                                         |
| G2583_1122             | ECs0970  | Z1229  | aat  | Leucyl/phenylalanyl-tRNA--protein transferase                                                |
| G2583_1123             | ECs0971  | Z1230  | cydC | ABC transporter, CydDC cysteine exporter (CydDC-E) family, permease/ATP-binding protein CydC |
| G2583_1124             | ECs0972  | Z1231  | cydD | ABC transporter, CydDC cysteine exporter (CydDC-E) family, permease/ATP-binding protein CydD |
| G2583_1125             | ECs0973  | Z1232  | trxB | Thioredoxin reductase                                                                        |
| G2583_1126             | ECs0974  | Z1234  | lrp  | Leucine-responsive regulatory protein                                                        |
| G2583_1127             | ECs0975  | Z1235  | ftsK | DNA translocase FtsK                                                                         |
| G2583_1128             | ECs0976  | Z1237  | lolA | Outer-membrane lipoprotein carrier protein precursor                                         |
| G2583_1129             | ECs0977  | Z1238  | rarA | Replication-associated recombination protein A                                               |
| G2583_1130             | ECs0978  | Z1239  | serS | Seryl-tRNA synthetase                                                                        |
| G2583_1131             | ECs0979  | Z1240  | dmsA | Anaerobic dimethyl sulfoxide reductase, A subunit                                            |
| G2583_1132             | ECs0980  | Z1241  | dmsB | Anaerobic dimethyl sulfoxide reductase chain B                                               |
| G2583_1133             | ECs0981  | Z1242  | dmsC | Anaerobic dimethyl sulfoxide reductase subunit C                                             |
| G2583_1134             | ECs0982  | Z1243  | ycaC | Protein ycaC                                                                                 |
| G2583_1135             | ECs0983  | Z1244  | ycaD | putative MFS family transporter protein                                                      |
| G2583_1136             | ECs0984  | Z1245  | ycaM | Amino acid permease family protein                                                           |
| G2583_1137             | ECs0985  | Z1246  | pflA | Pyruvate formate lyase-activating enzyme 1                                                   |
| G2583_1138             | ECs0986  | Z1248  | pflB | Formate acetyltransferase                                                                    |
| G2583_1139             | ECs0987  | Z1250  | focA | FocA formate FNT transporter                                                                 |



Table S10. The orthologue table of the O55 and O157 strains Page 33

| Locus_tag <sup>a</sup> |         |        | Gene | Product                                                                                |
|------------------------|---------|--------|------|----------------------------------------------------------------------------------------|
| CB9615                 | Sakai   | EDL933 |      |                                                                                        |
| G2583_1140             | ECs0988 | Z1251  | ycaO | hypothetical protein                                                                   |
| G2583_1141             | ECs0989 | Z1252  | ycaP | hypothetical protein                                                                   |
| G2583_1142             | ECs0990 | Z1253  | serC | Phosphoserine aminotransferase                                                         |
| G2583_1143             | ECs0991 | Z1254  | aroA | 3-phosphoshikimate 1-carboxyvinyltransferase                                           |
| G2583_1144             | ECs0992 | Z1255  | ycaL | Peptidase, M48B family                                                                 |
| G2583_1145             | ECs0993 | Z1256  | cmk  | Cytidylate kinase                                                                      |
| G2583_1146             | ECs0994 | Z1257  | rpsA | 30S ribosomal protein S1                                                               |
| G2583_1147             | ECs0995 | Z1258  | ihfB | Integration host factor subunit beta                                                   |
| G2583_1148             | ECs0996 | Z1259  | ycaI | DNA internalization-related competence protein<br>ComEC/Rec2                           |
| G2583_1149             | ECs0997 | Z1260  | msbA | Lipid A export ATP-binding/permease protein msbA                                       |
| G2583_1150             | ECs0998 | Z1261  | lpxK | Tetraacyldisaccharide 4'-kinase                                                        |
| G2583_1151             | ECs0999 | Z1262  | ycaQ | hypothetical protein                                                                   |
| G2583_1152             | ECs1000 | Z1263  | ycaR | UPF0434 protein ycaR                                                                   |
| G2583_1153             | ECs1001 | Z1264  | kdsB | 3-deoxy-manno-octulosonate cytidyltransferase                                          |
| G2583_1154             | ECs1002 | Z1265  | ycbJ | hypothetical protein                                                                   |
| G2583_1155             | ECs1003 | Z1267  | ycbC | hypothetical protein                                                                   |
| G2583_1156             | ECs1004 | Z1268  | smtA | SmtA protein                                                                           |
| G2583_1157             | ECs1005 | Z1269  | mukF | Chromosome partition protein mukF                                                      |
| G2583_1158             | ECs1006 | Z1270  | mukE | MukE                                                                                   |
| G2583_1159             | ECs1007 | Z1271  | mukB | Uncharacterized protein involved in chromosome<br>partitioning                         |
| G2583_1160             | ECs1008 | Z1272  | ycbB | Putative peptidoglycan binding domain                                                  |
| G2583_1161             | ECs1009 | Z1273  | ycbK | hypothetical protein                                                                   |
| G2583_1162             | ECs1010 | Z1274  | ycbL | Metallo-beta-lactamase family protein                                                  |
| G2583_1163             | ECs1011 | Z1275  | aspC | Aspartate transaminase                                                                 |
| G2583_1164             | ECs1012 | Z1276  | ompF | Outer membrane protein F                                                               |
| G2583_1165             | ECs1013 | Z1278  | asnS | Asparaginylyl-tRNA synthetase                                                          |
| G2583_1166             | ECs1014 | Z1279  | pncB | Nicotinate phosphoribosyltransferase                                                   |
| G2583_1167             | ECs1015 | Z1280  | pepN | Aminopeptidase N                                                                       |
| G2583_1168             | ECs1016 | Z1281  | ssuB | ABC transporter, ATP-binding protein                                                   |
| G2583_1169             | ECs1017 | Z1282  | ssuC | Putative sulfonate ABC transporter, permease protein                                   |
| G2583_1170             | ECs1018 | Z1283  | ssuD | Alkanesulfonate monooxygenase                                                          |
| G2583_1171             | ECs1019 | Z1284  | ssuA | ABC transporter, periplasmic substrate-binding protein,<br>aliphatic sulfonates family |
| G2583_1172             | ECs1020 | Z1285  | ssuE | NAD(P)H-dependent FMN reductase                                                        |
| G2583_1173             | ECs1021 | Z1286  | ycbQ | Putative fimbrial-like protein                                                         |
| G2583_1174             | ECs1022 | Z1287  | ycbR | Putative chaperone                                                                     |
| G2583_1175             | ECs1023 | Z1288  | ycbS | PapC-like porin protein involved in fimbrial biogenesis                                |
| G2583_1175             | ECs1024 | Z1289  | ycbS | PapC-like porin protein involved in fimbrial biogenesis                                |
| G2583_1176             | ECs1025 | Z1290  | ycbT | Putative fimbrial protein                                                              |
| G2583_1177             | ECs1026 | Z1291  | ycbU | Uncharacterized fimbrial-like protein ycbU precursor                                   |
| G2583_1178             | ECs1027 | Z1292  | ycbV | Putative fimbrial-like protein                                                         |
| G2583_1179             | ECs1028 | Z1293  | ycbF | hypothetical protein                                                                   |

Table S10. The orthologue table of the O55 and O157 strains Page 34

| Locus_tag <sup>a</sup> |         |        | Gene  | Product                                                               |
|------------------------|---------|--------|-------|-----------------------------------------------------------------------|
| CB9615                 | Sakai   | EDL933 |       |                                                                       |
| G2583_1179             |         |        | ycbF  | hypothetical protein                                                  |
| G2583_1180             | ECs1029 | Z1294  | pyrD  | Dihydroorotate dehydrogenase                                          |
| G2583_1181             | ECs1030 | Z1295  | ycbW  | hypothetical protein                                                  |
| G2583_1182             | ECs1031 | Z1297  | ycbX  | MOSC domain protein                                                   |
| G2583_1183             | ECs1032 | Z1298  | rlmL  | Putative RNA methylase family UPF0020                                 |
| G2583_1184             | ECs1033 | Z1299  | uup   | ABC transporter, ATP-binding protein                                  |
| G2583_1185             | ECs1034 | Z1300  | pqiA  | Paraquat-inducible protein A                                          |
| G2583_1186             | ECs1035 | Z1301  | pqiB  | Paraquat-inducible protein B                                          |
| G2583_1187             | ECs1036 | Z1302  | ymbA  | putative lipoprotein                                                  |
| G2583_1188             | ECs1037 | Z1303  | rmf   | Ribosome modulation factor                                            |
| G2583_1189             | ECs1038 | Z1304  | fabA  | 3-hydroxydecanoyl-ACP dehydratase                                     |
| G2583_1190             | ECs1039 | Z1305  | ycbZ  | Peptidase, S16 (Lon protease) family                                  |
| G2583_1191             | ECs1040 | Z1306  | ycbG  | UPF0268 protein ycbG                                                  |
| G2583_1192             | ECs1041 | Z1307  | ompA  | OmpA domain protein transmembrane region-containing protein precursor |
| G2583_1193             | ECs1042 | Z1308  | sulA  | Suppressor of lon                                                     |
| G2583_1194             | ECs1043 | Z1309  | sxy   | conserved protein                                                     |
| G2583_1195             | ECs1044 | Z1311  | yccS  | hypothetical protein                                                  |
| G2583_1196             | ECs1045 | Z1312  | yccF  | hypothetical protein                                                  |
| G2583_1197             | ECs1046 | Z1313  | helD  | DNA helicase IV                                                       |
| G2583_1198             | ECs1047 | Z1314  | mgsA  | Methylglyoxal synthase                                                |
| G2583_1199             | ECs1048 | Z1315  | yccT  | UPF0319 protein yccT precursor                                        |
| G2583_1200             | ECs1049 | Z1317  | yccU  | hypothetical protein                                                  |
| G2583_1201             | ECs1050 | Z1318  | hspQ  | Heat shock protein hspQ                                               |
| G2583_1202             | ECs1051 | Z1319  | yccW  | putative oxidoreductase                                               |
| G2583_1203             | ECs1052 | Z1320  | yccX  | Acylphosphatase                                                       |
| G2583_1204             | ECs1053 | Z1321  | yccK  | Sulfurtransferase tusE                                                |
| G2583_1205             | ECs1054 | Z1322  | yccA  | Inner membrane protein yccA                                           |
| Indel-28               | ECs1055 | Z1323  | -     | putative integrase                                                    |
| Indel-28               | ECs1056 |        | -     | hypothetical protein                                                  |
| Indel-28               | ECs1057 | Z1324  | -     | hypothetical protein                                                  |
| Indel-28               | ECs1058 | Z1325  | -     | hypothetical protein                                                  |
| Indel-28               | ECs1059 | Z1326  | -     | putative division inhibition protein                                  |
| Indel-28               | dicF1   | RNA026 | dicF1 | DicF antisense RNA                                                    |
| Indel-28               | ECs1060 |        | -     | hypothetical protein                                                  |
| Indel-28               | ECs1061 | Z1328  | -     | hypothetical protein                                                  |
| Indel-28               | ECs1062 |        | -     | hypothetical protein                                                  |
| Indel-28               | ECs1063 | Z1329  | -     | hypothetical protein                                                  |
| Indel-28               | ECs1064 | Z1330  | -     | hypothetical protein                                                  |
| Indel-28               | ECs1065 | Z1331  | -     | hypothetical protein                                                  |
| Indel-28               | ECs1066 |        | -     | hypothetical protein                                                  |
| Indel-28               | ECs1067 |        | -     | hypothetical protein                                                  |
| Indel-28               | ECs1068 | Z1332  | -     | hypothetical protein                                                  |
| Indel-28               | ECs1069 | Z1333  | -     | putative regulatory protein                                           |

Table S10. The orthologue table of the O55 and O157 strains Page 35

| Locus_tag <sup>a</sup> |         |          | Gene  | Product                                                       |
|------------------------|---------|----------|-------|---------------------------------------------------------------|
| CB9615                 | Sakai   | EDL933   |       |                                                               |
| Indel-28               | ECs1070 | Z1334    | -     | hypothetical protein                                          |
| Indel-28               | ECs1071 | Z1335    | -     | hypothetical protein                                          |
| Indel-28               |         | Z1336    | -     | unknown protein encoded by cryptic prophage CP-               |
| Indel-28               | ECs1072 |          | -     | hypothetical protein                                          |
| Indel-28               | ECs1073 | Z1337    | -     | hypothetical protein                                          |
| Indel-28               | ECs1074 | Z1338    | -     | putative DNA replication protein                              |
| Indel-28               | ECs1075 | Z1339    | -     | hypothetical protein                                          |
| Indel-28               | ECs1076 | Z1340    | -     | hypothetical protein                                          |
| Indel-28               | ECs1077 | Z1341    | -     | hypothetical protein                                          |
| Indel-28               | ECs1078 |          | -     | hypothetical protein                                          |
| Indel-28               | ECs1079 |          | -     | hypothetical protein                                          |
| Indel-28               | ECs1080 | Z1342    | -     | prophage maintenance protein                                  |
| Indel-28               | ECs1081 |          | -     | hypothetical protein                                          |
| Indel-28               | ECs1082 | Z1343    | -     | hypothetical protein                                          |
| Indel-28               | ECs1083 | Z1344    | -     | putative crossover junction endodeoxyribonuclease             |
| Indel-29               | ECs1084 | Indel-29 | -     | putative antitermination protein                              |
| Indel-29               | ECs1085 | Indel-29 | -     | hypothetical membrane protein                                 |
| Indel-29               | ECs1086 | Indel-29 | -     | hypothetical protein                                          |
| Indel-29               | ECs1087 | Indel-29 | -     | putative transcriptional regulator                            |
| Indel-29               | ileZ1   | Indel-29 | ileZ1 | Ile tRNA                                                      |
| Indel-29               | argN1   | Indel-29 | argN1 | Arg tRNA                                                      |
| Indel-29               | argO1   | Indel-29 | argO1 | Arg tRNA                                                      |
| Indel-29               | ECs1088 | Indel-29 | -     | hypothetical protein                                          |
| Indel-29               | ECs1089 | Indel-29 | -     | putative transposase OrfA protein of insertion sequence IS629 |
| Indel-29               | ECs1090 | Indel-29 | -     | putative transposase OrfB protein of insertion sequence IS629 |
| Indel-29               | ECs1091 | Indel-29 | -     | putative transcriptional regulator                            |
| Indel-29               | ECs1093 | Indel-29 | -     | putative endopeptidase                                        |
| Indel-29               | ECs1092 | Indel-29 | -     | putative lipoprotein Rz1 protein precursor                    |
| Indel-29               | ECs1094 | Indel-29 | -     | hypothetical protein                                          |
| Indel-29               | ECs1095 | Indel-29 | -     | hypothetical protein                                          |
| Indel-29               | ECs1096 | Indel-29 | -     | putative endolysin                                            |
| Indel-29               | ECs1098 | Indel-29 | -     | hypothetical protein                                          |
| Indel-29               | ECs1097 | Indel-29 | -     | hypothetical protein                                          |
| Indel-29               | ECs1099 | Indel-29 | -     | hypothetical protein                                          |
| Indel-29               | ECs1100 | Indel-29 | -     | putative holin protein                                        |
| Indel-29               | ECs1101 | Indel-29 | -     | hypothetical protein                                          |
| Indel-29               | ECs1102 | Indel-29 | -     | hypothetical protein                                          |
| Indel-29               | ECs1103 | Indel-29 | -     | hypothetical protein                                          |
| Indel-29               | ECs1104 | Indel-29 | -     | hypothetical protein                                          |
| Indel-29               | ECs1105 | Indel-29 | -     | putative terminase small subunit                              |
| Indel-29               | ECs1106 | Indel-29 | -     | putative terminase large subunit                              |
| Indel-29               | ECs1107 | Indel-29 | -     | putative portal protein                                       |

Table S10. The orthologue table of the O55 and O157 strains Page 36

| Locus_tag <sup>a</sup> |          |          | Gene | Product                                                                    |
|------------------------|----------|----------|------|----------------------------------------------------------------------------|
| CB9615                 | Sakai    | EDL933   |      |                                                                            |
| Indel-29               | ECs1108  | Indel-29 | -    | putative head-tail preconnector protein                                    |
| Indel-29               | ECs1109  | Indel-29 | -    | putative head decoration protein                                           |
| Indel-29               | ECs1110  | Indel-29 | -    | putative major head protein                                                |
| Indel-29               | ECs1111  | Indel-29 | -    | hypothetical protein                                                       |
| Indel-29               | ECs1112  | Indel-29 | -    | putative minor tail protein                                                |
| Indel-29               | ECs1113  | Indel-29 | -    | putative minor tail protein                                                |
| Indel-29               | ECs1114  | Indel-29 | -    | putative tail length tape measure protein                                  |
| Indel-29               | ECs1115  | Indel-29 | -    | putative minor tail protein                                                |
| Indel-29               | ECs1116  | Indel-29 | -    | putative minor tail protein                                                |
| Indel-29               | ECs1117  | Indel-29 | -    | putative tail assembly protein                                             |
| Indel-29               | ECs1118  | Indel-29 | -    | putative tail assembly protein                                             |
| Indel-29               | ECs1119  | Indel-29 | -    | hypothetical protein                                                       |
| Indel-29               | ECs1120  | Indel-29 | -    | putative copper/zinc-superoxide dismutase                                  |
| Indel-29               | ECs1121  | Indel-29 | -    | putative host specificity protein                                          |
| Indel-29               | ECs1122  | Indel-29 | -    | putative outer membrane protein                                            |
| Indel-29               | ECs1123  | Indel-29 | -    | putative tail fiber protein                                                |
| Indel-29               | ECs1124  | Indel-29 | -    | hypothetical protein                                                       |
| Indel-31               | ECs1125  |          | -    | hypothetical protein                                                       |
| Indel-29               | ECs1126  | Indel-29 | -    | EspF-like protein                                                          |
| Indel-30               | Indel-30 | Z1345    | -    | antitermination protein Q homolog of cryptic prophage CP-933M              |
| Indel-30               | Indel-30 | Z1346    | -    | unknown protein encoded by cryptic prophage CP-                            |
| Indel-30               | Indel-30 | Z1347    | -    | unknown protein encoded by cryptic prophage CP-                            |
| Indel-30               | Indel-30 | Z1348    | -    | unknown protein encoded by cryptic prophage CP-                            |
| Indel-30               | Indel-30 | Z1349    | -    | conserved hypothetical protein similar to yjH for cryptic prophage CP-933M |
| Indel-30               | Indel-30 | Z1350    | -    | putative holin protein of cryptic prophage CP-933M                         |
| Indel-30               | Indel-30 | Z1351    | -    | unknown protein encoded by cryptic prophage CP-                            |
| Indel-30               | Indel-30 | Z1352    | -    | putative endolysin of cryptic prophage CP-933M                             |
| Indel-30               | Indel-30 | Z1353    | -    | putative antirepressor protein of cryptic prophage CP-933M                 |
| Indel-30               | Indel-30 | Z1354    | -    | putative endopeptidase of cryptic prophage CP-933M                         |
| Indel-30               | Indel-30 | Z1355    | -    | unknown protein encoded by cryptic prophage CP-                            |
| Indel-30               | Indel-30 | Z1356    | -    | unknown protein encoded by cryptic prophage CP-                            |
| Indel-30               | Indel-30 | Z1357    | -    | unknown protein encoded by cryptic prophage CP-                            |
| Indel-30               | Indel-30 | Z1358    | -    | unknown protein encoded by cryptic prophage CP-                            |
| Indel-30               | Indel-30 | Z1359    | -    | unknown protein encoded by cryptic prophage CP-                            |
| Indel-30               | Indel-30 | Z1360    | -    | unknown protein encoded by cryptic prophage CP-                            |
| Indel-30               | Indel-30 | Z1361    | -    | unknown protein encoded by cryptic prophage CP-                            |
| Indel-30               | Indel-30 | Z1362    | -    | unknown protein encoded by cryptic prophage CP-                            |
| Indel-30               | Indel-30 | Z1363    | -    | unknown protein encoded by cryptic prophage CP-                            |
| Indel-30               | Indel-30 | Z1364    | -    | unknown protein encoded by cryptic prophage CP-                            |
| Indel-30               | Indel-30 | Z1365    | -    | unknown protein encoded by cryptic prophage CP-                            |
| Indel-30               | Indel-30 | Z1366    | -    | unknown protein encoded by cryptic prophage CP-                            |

Table S10. The orthologue table of the O55 and O157 strains Page 37

| Locus_tag <sup>a</sup> |          |        | Gene | Product                                                                           |
|------------------------|----------|--------|------|-----------------------------------------------------------------------------------|
| CB9615                 | Sakai    | EDL933 |      |                                                                                   |
| Indel-30               | Indel-30 | Z1367  | -    | unknown protein encoded by cryptic prophage CP-                                   |
| Indel-30               | Indel-30 | Z1368  | -    | unknown protein encoded by cryptic prophage CP-                                   |
| Indel-30               | Indel-30 | Z1369  | -    | unknown protein encoded by cryptic prophage CP-                                   |
| Indel-30               | Indel-30 | Z1370  | -    | putative tail component encoded by cryptic prophage CP-933M                       |
| Indel-30               | Indel-30 | Z1371  | -    | putative tail assembly chaperone encoded by cryptic prophage CP-933M              |
| Indel-30               | Indel-30 | Z1372  | -    | unknown protein encoded by cryptic prophage CP-                                   |
| Indel-30               | Indel-30 | Z1373  | -    | unknown protein encoded by cryptic prophage CP-                                   |
| Indel-30               | Indel-30 | Z1374  | -    | unknown protein encoded by cryptic prophage CP-                                   |
| Indel-30               | Indel-30 | Z1375  | -    | putative tail component encoded by cryptic prophage CP-933M; partial              |
| Indel-30               | Indel-30 | Z1376  | -    | putative tail component encoded by cryptic prophage CP-933M; partial              |
| Indel-30               | Indel-30 | Z1377  | -    | putative tail component encoded by cryptic prophage CP-933M                       |
| Indel-30               | Indel-30 | Z1378  | -    | putative tail component encoded by cryptic prophage CP-933M; partial              |
| Indel-30               | Indel-30 | Z1379  | -    | putative tail component encoded by cryptic prophage CP-933M; partial              |
| Indel-30               | Indel-30 | Z1380  | -    | putative tail component encoded by cryptic prophage CP-933M; partial              |
| Indel-30               | Indel-30 | Z1381  | -    | putative outer membrane protein Lom precursor encoded by cryptic prophage CP-933M |
| Indel-30               | Indel-30 | Z1382  | -    | putative tail component encoded by cryptic prophage CP-933M; partial              |
| Indel-30               | Indel-30 | Z1383  | -    | unknown protein encoded by cryptic prophage CP-                                   |
| Indel-31               | Indel-31 | Z1386  | -    | unknown protein encoded by cryptic prophage CP-                                   |
| Indel-31               | ECs1127  | Z1387  | -    | hypothetical protein                                                              |
| G2583_1206             | serT     | RNA027 | serT | Ser tRNA                                                                          |
| G2583_1207             | ECs1128  | Z1389  | hyaA | Nickel-dependent hydrogenase 1, small subunit                                     |
| G2583_1208             | ECs1129  | Z1390  | hyaB | Hydrogenase-1 large subunit                                                       |
| G2583_1209             | ECs1130  | Z1391  | hyaC | Probable Ni/Fe-hydrogenase 1 B-type cytochrome                                    |
| G2583_1210             | ECs1131  | Z1392  | hyaD | hydrogenase 1 maturation protease                                                 |
| G2583_1211             | ECs1132  | Z1393  | hyaE | Hydrogenase-1 expression protein HyaE                                             |
| G2583_1212             | ECs1133  | Z1394  | hyaF | Hydrogenase-1 operon protein HyaF                                                 |
| G2583_1213             | ECs1134  | Z1395  | appC | Cytochrome bd-II oxidase, subunit I                                               |
| G2583_1214             | ECs1135  | Z1396  | appB | Cytochrome bd-II oxidase, subunit II                                              |
| G2583_1215             | ECs1136  | Z1397  | appA | Phosphoanhydride phosphorylase                                                    |
| G2583_1216             | ECs1137  | Z1398  | etk  | Tyrosine-protein kinase etk                                                       |
| G2583_1217             | ECs1138  | Z1399  | etp  | Putative phosphatase                                                              |
| G2583_1218             | ECs1139  | Z1400  | gfcE | Putative polysaccharide export protein gfcE precursor                             |
| G2583_1219             | ECs1140  | Z1401  | gfcD | Group 4 capsule (G4C) polysaccharide, lipoprotein                                 |
| G2583_1220             | ECs1141  | Z1402  | gfcC | Group 4 capsule (G4C) polysaccharide, YmcB                                        |

Table S10. The orthologue table of the O55 and O157 strains Page 38

| Locus_tag <sup>a</sup> |         |          | Gene | Product                                               |
|------------------------|---------|----------|------|-------------------------------------------------------|
| CB9615                 | Sakai   | EDL933   |      |                                                       |
| G2583_1221             | ECs1142 | Z1403    | gfcB | Group 4 capsule (G4C) polysaccharide, lipoprotein     |
| G2583_1222             | ECs1143 | Z1404    | ymcD | putative inner membrane protein                       |
| G2583_1223             | ECs1144 | Z1405    | cspH | Cold shock-like protein cspH                          |
| G2583_1224             | ECs1145 | Z1406    | cspG | Cold shock-like protein cspG                          |
| G2583_1225             | ECs1146 | Z1408    | ymcE | cold shock gene                                       |
| G2583_1226             | ECs1147 | Z1409    | yccM | 4Fe-4S binding domain protein                         |
| G2583_1227             | ECs1148 | Z1410    | torS | hybrid sensory histidine kinase TorS                  |
| G2583_1228             | ECs1149 | Z1411    | torT | Periplasmic protein torT precursor                    |
| G2583_1229             | ECs1150 | Z1412    | torR | TorCAD operon transcriptional regulatory protein torR |
| G2583_1230             | ECs1151 | Z1414    | torC | Cytochrome c-type protein TorC                        |
| G2583_1231             | ECs1152 | Z1415    | torA | Trimethylamine-N-oxide reductase 1 precursor          |
| G2583_1232             | ECs1153 | Z1416    | torD | Chaperone protein torD                                |
| G2583_1233             | ECs1154 | Z1417    | cbpM | Chaperone modulatory protein cbpM                     |
| G2583_1234             | ECs1155 | Z1418    | cbpA | Curved DNA-binding protein                            |
| G2583_1235             | ECs1156 | Z1419    | yccE | conserved hypothetical protein                        |
| G2583_1235             | ECs1157 | Z1420    | yccE | conserved hypothetical protein                        |
| G2583_1236             | ECs1158 | Z1421    | agp  | Glucose-1-phosphatase                                 |
| G2583_1237             | ECs1159 | Z1422    | yccJ | hypothetical protein                                  |
| G2583_1238             | ECsp005 | Z1423    | wrbA | Flavoprotein wrbA                                     |
| Indel-33               | ECs1160 | Z1424    | intW | putative integrase                                    |
| Indel-33               | ECs1161 | Z1425    | xisW | putative excisionase                                  |
| Indel-33               | ECs1162 | Z1426    | -    | hypothetical protein                                  |
| Indel-33               | ECs1163 | Z1428    | -    | hypothetical protein                                  |
| Indel-33               | ECs1164 | Z1429    | -    | hypothetical protein                                  |
| Indel-33               | ECs1165 | Z1430    | -    | hypothetical protein                                  |
| Indel-33               | ECs1166 |          | -    | hypothetical protein                                  |
| Indel-33               |         | Z1431    | -    | unknown protein encoded by bacteriophage BP-933W      |
| Indel-33               | ECs1167 |          | -    | hypothetical protein                                  |
| Indel-33               | ECs1168 |          | -    | hypothetical protein                                  |
| Indel-33               | ECs1169 | Z1432    | -    | hypothetical protein                                  |
| Indel-33               | ECs1170 |          | -    | C4-type zinc finger protein (TraR family)             |
| Indel-33               | ECs1171 | Z1433    | -    | hypothetical protein                                  |
| Indel-33               | ECs1172 | Z1434    | -    | hypothetical protein                                  |
| Indel-33               | ECs1173 |          | -    | hypothetical protein                                  |
| Indel-33               | ECs1174 | Z1435    | exoW | exonuclease                                           |
| Indel-33               | ECs1175 | Z1437    | betW | recombination protein Bet                             |
| Indel-33               | ECs1176 | Z1438    | gamW | host-nuclease inhibitor protein Gam                   |
| Indel-33               | ECs1177 | Z1439    | kilW | Kil protein                                           |
| Indel-33               | ECs1178 |          | -    | regulatory protein cIII                               |
| Indel-33               | ECs1179 | Z1440    | ssbW | single strand binding protein Ea10                    |
| Indel-34               | ECs1180 | Indel-34 | -    | hypothetical protein                                  |
| Indel-34               | ECs1181 | Indel-34 | -    | putative anti-termination protein N                   |
| Indel-34               | ECs1182 | Indel-34 | -    | hypothetical protein                                  |
| Indel-34               | ECs1183 | Indel-34 | -    | hypothetical protein                                  |

Table S10. The orthologue table of the O55 and O157 strains Page 39

| Locus_tag <sup>a</sup> |          |          | Gene  | Product                                                             |
|------------------------|----------|----------|-------|---------------------------------------------------------------------|
| CB9615                 | Sakai    | EDL933   |       |                                                                     |
| Indel-34               | ECs1184  | Indel-34 | -     | hypothetical protein                                                |
| Indel-34               | ECs1185  | Indel-34 | -     | putative cl repressor protein                                       |
| Indel-34               | ECs1186  | Indel-34 | -     | putative regulatory protein                                         |
| Indel-34               | ECs1187  | Indel-34 | -     | regulatory protein CII                                              |
| Indel-34               | ECs1188  | Indel-34 | -     | hypothetical protein                                                |
| Indel-34               | ECs1189  | Indel-34 | -     | replication protein O                                               |
| Indel-34               | ECs1190  | Indel-34 | -     | replication protein P                                               |
| Indel-34               | ECs1191  | Indel-34 | -     | hypothetical protein                                                |
| Indel-34               | ECs1192  | Indel-34 | -     | hypothetical protein                                                |
| Indel-34               | ECs1193  | Indel-34 | -     | hypothetical protein                                                |
| Indel-34               | ECs1194  | Indel-34 | -     | hypothetical protein                                                |
| Indel-34               | ECs1195  | Indel-34 | -     | hypothetical protein                                                |
| Indel-34               | ECs1196  | Indel-34 | -     | putative DNA methylase                                              |
| Indel-34               | ECs1197  | Indel-34 | -     | NinE protein                                                        |
| Indel-34               | ECs1198  | Indel-34 | -     | hypothetical protein                                                |
| Indel-34               | ECs1199  | Indel-34 | -     | putative antirepressor protein                                      |
| Indel-35               | Indel-35 | Z1441    | -     | unknown protein encoded by bacteriophage BP-933W                    |
| Indel-35               | Indel-35 | Z1442    | -     | putative antitermination protein N of bacteriophage BP-933W         |
| Indel-35               | Indel-35 | Z1443    | -     | unknown protein encoded by bacteriophage BP-933W                    |
| Indel-35               | Indel-35 | Z1444    | -     | putative serine/threonine kinase encoded by bacteriophage BP-933W   |
| Indel-35               | Indel-35 | Z1445    | -     | unknown protein encoded by bacteriophage BP-933W                    |
| Indel-35               | Indel-35 | Z1446    | -     | unknown protein encoded by bacteriophage BP-933W                    |
| Indel-35               | Indel-35 | Z1447    | -     | putative repressor protein CI of bacteriophage BP-933W              |
| Indel-35               | Indel-35 | Z1448    | -     | regulatory protein Cro of bacteriophage BP-933W                     |
| Indel-35               | Indel-35 | Z1449    | -     | putative regulatory protein CII of bacteriophage BP-                |
| Indel-35               | Indel-35 | Z1450    | -     | putative replication protein O of bacteriophage BP-                 |
| Indel-35               | Indel-35 | Z1451    | -     | putative replication protein P of bacteriophage BP-933W             |
| Indel-35               | Indel-35 | Z1452    | -     | unknown protein encoded by bacteriophage BP-933W                    |
| Indel-35               | Indel-35 | Z1453    | -     | unknown protein encoded by bacteriophage BP-933W                    |
| Indel-35               | Indel-35 | Z1454    | -     | putative DNA N-6-adenine-methyltransferase of bacteriophage BP-933W |
| Indel-35               | Indel-35 | Z1456    | -     | unknown protein encoded by bacteriophage BP-933W                    |
| Indel-36               | ECs1200  | Z1457    | -     | DNA-binding protein                                                 |
| Indel-36               | ECs1201  | Z1458    | -     | hypothetical protein NinG                                           |
| Indel-36               | ECs1202  |          | -     | hypothetical protein                                                |
| Indel-36               | ECs1203  | Z1459    | -     | antitermination protein Q                                           |
| Indel-36               | ECs1204  | Z1460    | -     | hypothetical protein                                                |
| Indel-36               | ileZ2    | RNA028   | ileZ2 | Ile tRNA                                                            |
| Indel-36               | argN2    | RNA029   | argN2 | Arg tRNA                                                            |
| Indel-36               | argO2    | RNA030   | argO2 | Arg tRNA                                                            |
| Indel-36               | ECs1205  | Z1464    | stx2A | Shiga toxin 2 subunit A                                             |
| Indel-36               | ECs1206  | Z1465    | stx2B | Shiga toxin 2 subunit B                                             |

Table S10. The orthologue table of the O55 and O157 strains Page 40

| Locus_tag <sup>a</sup> |         |          | Gene | Product                                                       |
|------------------------|---------|----------|------|---------------------------------------------------------------|
| CB9615                 | Sakai   | EDL933   |      |                                                               |
| Indel-36               | ECs1207 | Z1466    | -    | hypothetical protein                                          |
| Indel-37               | ECs1208 | Indel-37 | -    | putative transposase OrfB protein of insertion sequence IS629 |
| Indel-37               | ECs1209 | Indel-37 | -    | putative transposase OrfA protein of insertion sequence IS629 |
| Indel-38               | ECsp006 | Z1466    | -    | unknown protein encoded by bacteriophage BP-933W              |
| Indel-38               | ECs1210 |          | -    | hypothetical protein                                          |
| Indel-38               | ECs1211 | Z1467    | -    | hypothetical protein                                          |
| Indel-38               | ECs1212 | Z1468    | -    | putative holin protein                                        |
| Indel-38               | ECs1213 | Z1469    | -    | putative endolysin                                            |
| Indel-38               | ECs1214 | Z1471    | -    | putative antirepressor protein                                |
| Indel-38               | ECs1215 | Z1473    | -    | putative endopeptidase                                        |
| Indel-38               | ECs1216 |          | -    | putative lipoprotein Rz1 precursor                            |
| Indel-38               | ECs1217 | Z1474    | borW | Bor protein precursor                                         |
| Indel-38               | ECs1218 |          | -    | hypothetical protein                                          |
| Indel-38               | ECs1219 | Z1475    | -    | putative small subunit terminase                              |
| Indel-38               | ECs1220 | Z1476    | -    | putative terminase large subunit                              |
| Indel-38               | ECs1221 | Z1477    | -    | putative portal protein                                       |
| Indel-38               | ECs1222 | Z1478    | -    | hypothetical protein                                          |
| Indel-38               | ECs1223 | Z1479    | -    | hypothetical protein                                          |
| Indel-38               | ECs1224 | Z1480    | -    | hypothetical protein                                          |
| Indel-38               | ECs1225 | Z1481    | -    | hypothetical protein                                          |
| Indel-38               | ECs1226 |          | -    | hypothetical protein                                          |
| Indel-38               | ECs1227 | Z1482    | -    | hypothetical protein                                          |
| Indel-38               | ECs1228 | Z1483    | -    | putative tail fiber protein                                   |
| Indel-38               | ECs1229 | Z1484    | -    | hypothetical protein                                          |
| Indel-38               | ECs1230 | Z1485    | -    | hypothetical protein                                          |
| Indel-38               | ECs1231 |          | -    | putative outer membrane protein                               |
| Indel-38               | ECs1232 | Z1486    | -    | hypothetical protein                                          |
| Indel-38               | ECs1233 | Z1487    | -    | putative tail tip fiber protein                               |
| Indel-38               | ECs1234 |          | -    | putative outer membrane protein                               |
| Indel-38               | ECs1235 | Z1488    | -    | hypothetical protein                                          |
| Indel-38               | ECs1236 | Z1489    | lomW | putative outer membrane precursor                             |
| Indel-38               | ECs1237 | Z1490    | -    | hypothetical protein                                          |
| Indel-38               | ECs1238 | Z1491    | -    | hypothetical protein                                          |
| Indel-38               | ECs1239 | Z1492    | -    | hypothetical protein                                          |
| Indel-38               | ECs1240 | Z1493    | -    | hypothetical protein                                          |
| Indel-38               | ECs1241 | Z1494    | -    | hypothetical protein                                          |
| Indel-38               | ECs1242 | Z1495    | -    | hypothetical protein                                          |
| Indel-38               | ECs1243 |          | -    | hypothetical protein                                          |
| Indel-38               | ECs1244 | Z1498    | -    | hypothetical protein                                          |
| Indel-38               | ECs1245 |          | -    | MokW protein                                                  |
| Indel-38               | ECs1246 | Z1500    | -    | hypothetical protein                                          |
| Indel-38               | ECs1247 | Z1501    | -    | hypothetical protein                                          |



Table S10. The orthologue table of the O55 and O157 strains Page 41

| Locus_tag <sup>a</sup> |         |          | Gene | Product                                                                 |
|------------------------|---------|----------|------|-------------------------------------------------------------------------|
| CB9615                 | Sakai   | EDL933   |      |                                                                         |
| Indel-38               | ECs1248 | Z1501    | -    | hypothetical protein                                                    |
| Indel-38               | ECs1249 |          | -    | hypothetical protein                                                    |
| Indel-39               | ECs1250 | Indel-39 | -    | C4-type zinc finger protein (TraR family)                               |
| Indel-40               | ECs1251 | Z1503    | -    | putative anti-repressor protein                                         |
| G2583_1238             |         | Z1504    | wrbA | Flavoprotein wrbA                                                       |
| G2583_1239             | ECs1252 | Z1505    | rutG | Putative purine permease ycdG                                           |
| G2583_1240             | ECs1253 | Z1506    | rutF | Flavin reductase domain protein FMN-binding                             |
| G2583_1241             | ECs1254 | Z1507    | rutE | Putative NADH dehydrogenase/NAD(P)H nitroreductase rutE                 |
| G2583_1242             | ECs1255 | Z1508    | rutD | putative acetyltransferase                                              |
| G2583_1243             | ECs1256 | Z1509    | rutC | hypothetical protein                                                    |
| G2583_1244             | ECs1257 | Z1510    | rutB | Putative synthetase                                                     |
| G2583_1245             | ECs1258 | Z1511    | rutA | Putative monooxygenase rutA                                             |
| G2583_1246             | ECs1259 | Z1512    | rutR | putative tet operon regulator                                           |
| G2583_1247             | ECs1260 | Z1513    | putA | Bifunctional protein PutA                                               |
| G2583_1248             | ECs1261 | Z1515    | putP | Sodium/proline symporter                                                |
| G2583_1249             | ECs1262 | Z1516    | -    | hypothetical protein                                                    |
| G2583_1250             |         | Z1517    | -    | hypothetical protein                                                    |
| G2583_1251             |         | Z1518    | -    | hypothetical protein                                                    |
| G2583_1252             | ECs1263 | Z1519    | ycdN | Ferrous iron permease efeU                                              |
| G2583_1253             | ECs1264 | Z1520    | ycdO | UPF0409 protein ycdO precursor                                          |
| G2583_1254             | ECs1265 | Z1521    | ycdB | Tat-translocated enzyme                                                 |
| G2583_1255             | ECs1266 | Z1522    | phoH | hypothetical protein                                                    |
| G2583_1256             | ECs1267 | Z1523    | pgaD | Biofilm PGA synthesis protein pgaD                                      |
| G2583_1257             | ECs1268 | Z1524    | pgaC | Biofilm PGA synthesis N-glycosyltransferase pgaC                        |
| G2583_1258             | ECs1269 | Z1525    | pgaB | Biofilm PGA synthesis lipoprotein pgaB                                  |
| G2583_1259             | ECs1270 | Z1526    | pgaA | Biofilm PGA synthesis protein pgaA precursor                            |
| G2583_1260             | ECs1271 | Z1527    | ycdT | diguanylate cyclase (GGDEF) domain protein                              |
| G2583_1261             | ECs1272 | Z1528    | rtn  | Rtn-like protein                                                        |
| G2583_1262             | ECs1273 | Z1530    | fidL | hypothetical protein                                                    |
| G2583_1263             | ECs1274 | Z1531    | marT | hypothetical protein                                                    |
|                        |         | Z1532    | -    | hypothetical protein                                                    |
| G2583_1264             | ECs1275 | Z1533    | ygcW | 2-deoxy-D-gluconate 3-dehydrogenase                                     |
| G2583_1265             | ECs1276 | Z1534    | -    | Putative chaperone protein                                              |
| G2583_1266             | ECs1277 | Z1535    | mrkD | hypothetical protein                                                    |
| G2583_1267             | ECs1278 | Z1536    | mrkC | Putative outer membrane usher protein                                   |
| G2583_1268             | ECs1279 | Z1537    | -    | Gram-negative pili assembly chaperone                                   |
| G2583_1269             | ECs1280 | Z1538    | mrkA | Fimbrial protein                                                        |
| G2583_1270             | ECs1281 | Z1539    | -    | hypothetical protein                                                    |
| G2583_1271             |         | Z1540    | -    | hypothetical protein                                                    |
| G2583_1272             |         | Z1541    | -    | hypothetical protein                                                    |
| G2583_1273             | ECs1282 | Z1542    | -    | Hemagglutinin/hemolysin-related protein                                 |
| G2583_1274             | ECs1283 | Z1543    | -    | Putative outer membrane transporter of ShIA/HecA/FhaA exoprotein family |

Table S10. The orthologue table of the O55 and O157 strains Page 42

| Locus_tag <sup>a</sup> |         |        | Gene   | Product                                                |
|------------------------|---------|--------|--------|--------------------------------------------------------|
| CB9615                 | Sakai   | EDL933 |        |                                                        |
| G2583_1275             | ECs1284 | Z1544  | -      | Probable holo-[acyl-carrier-protein] synthase 2        |
| G2583_1276             | ECs1285 | Z1545  | fabG   | NAD dependent epimerase/dehydratase family             |
| G2583_1277             | ECs1286 | Z1546  | cylZ   | Putative fatty acyl chain dehydrase                    |
| G2583_1278             | ECs1287 | Z1547  | -      | Putative acyl-carrier protein                          |
| G2583_1279             | ECs1288 | Z1548  | gcvT   | Putative aminomethyltransferase                        |
| G2583_1280             | ECs1289 | Z1549  | fabF   | Putative beta-ketoacyl-[acyl carrier protein] synthase |
| G2583_1281             | ECs1290 | Z1550  | olmA   | Beta-ketoacyl synthase, C-domain protein               |
| G2583_1282             | ECs1291 | Z1551  | -      | hypothetical protein                                   |
| G2583_1283             | ECs1292 | Z1552  | -      | Lipoprotein-releasing system ATP-binding protein LpID  |
| G2583_1284             | ECs1293 | Z1553  | -      | hypothetical protein                                   |
| G2583_1285             | ECs1294 | Z1554  | -      | hypothetical protein                                   |
| G2583_1286             | ECs1295 | Z1555  | -      | hypothetical protein                                   |
| G2583_1287             | ECs1296 | Z1556  | -      | hypothetical protein                                   |
| G2583_1288             | ECs1297 | Z1557  | -      | Malonyl CoA-acyl carrier protein transacylase          |
| G2583_1289             | ECs1298 | Z1558  | ycdU   | hypothetical protein                                   |
| Indel-45               | ECs1299 | Z1559  | -      | putative integrase                                     |
| Indel-45               | ECs1300 | Z1560  | -      | putative membrane protein                              |
| Indel-45               | ECsp007 | Z1561  | -      | hypothetical protein                                   |
| Indel-45               | ECs1301 | Z1562  | -      | transposase                                            |
| Indel-45               | ECs1302 | Z1563  | -      | putative regulatory protein                            |
| Indel-45               |         | Z1564  | -      | hypothetical protein                                   |
| Indel-45               | ECs1303 | Z1565  | -      | hypothetical protein                                   |
| Indel-45               |         | Z1566  | -      | hypothetical protein                                   |
| Indel-45               | ECs1304 | Z1567  | -      | hypothetical protein                                   |
| Indel-45               | ECs1305 | Z1568  | -      | hypothetical protein                                   |
| Indel-45               |         | Z1569  | -      | hypothetical protein                                   |
| Indel-45               | ECs1306 |        | -      | hypothetical protein                                   |
| Indel-45               | ECsp008 |        | -      | IS30 transposase                                       |
| Indel-45               | ECs1307 | Z1570  | -      | hypothetical protein                                   |
| Indel-45               | ECs1308 | Z1571  | -      | hypothetical protein                                   |
| Indel-45               | ECs1309 |        | -      | hypothetical protein                                   |
| Indel-45               | ECs1310 | Z1572  | -      | IS30 transposase                                       |
| Indel-45               | ECs1311 | Z1573  | -      | putative transposase                                   |
| Indel-45               | ECs1312 | Z1574  | -      | putative complement resistance protein precursor       |
| Indel-45               | ECs1313 | Z1575  | -      | hypothetical protein                                   |
| Indel-45               | ECs1314 | Z1576  | -      | hypothetical protein                                   |
| Indel-45               | ECs1315 |        | -      | hypothetical protein                                   |
| Indel-45               |         | Z1577  | -      | hypothetical protein                                   |
| Indel-45               | ECs1316 | Z1578  | -      | putative diacylglycerol kinase                         |
| Indel-45               | ECs1317 | Z1579  | -      | putative outer membrane protein                        |
| Indel-45               | ECs1318 |        | -      | hypothetical protein                                   |
| Indel-45               | ECs1319 | Z1580  | -      | hypothetical protein                                   |
| Indel-45               | ECs1320 |        | -      | hypothetical protein                                   |
| Indel-45               | ECs1321 | Z1581  | ureD_2 | urease-associated protein UreD                         |

Table S10. The orthologue table of the O55 and O157 strains Page 43

| Locus_tag <sup>a</sup> |         |        | Gene   | Product                                    |
|------------------------|---------|--------|--------|--------------------------------------------|
| CB9615                 | Sakai   | EDL933 |        |                                            |
| Indel-45               | ECs1322 | Z1582  | ureA_2 | urease gamma subunit                       |
| Indel-45               | ECs1323 | Z1583  | ureB_2 | urease beta subunit                        |
| Indel-45               | ECs1324 | Z1584  | ureC_2 | urease alpha subunit                       |
| Indel-45               | ECs1325 | Z1585  | ureE_2 | urease accessory protein UreE              |
| Indel-45               | ECs1326 | Z1586  | ureF_2 | urease accessory protein UreF              |
| Indel-45               | ECs1327 | Z1587  | ureG_2 | urease accessory protein UreG              |
| Indel-45               | ECsp009 |        | -      | autosecreted serine protease               |
| Indel-45               |         | Z1588  | -      | hypothetical protein                       |
| Indel-45               | ECs1328 | Z1589  | -      | hypothetical protein                       |
| Indel-45               | ECs1329 |        | -      | hypothetical protein                       |
| Indel-45               |         | Z1590  | -      | hypothetical protein                       |
| Indel-45               | ECs1330 | Z1591  | -      | ribosomal protein L31-like protein         |
| Indel-45               |         | Z1592  | -      | hypothetical protein                       |
| Indel-45               | ECs1331 |        | -      | hypothetical protein                       |
| Indel-45               |         | Z1593  | -      | hypothetical protein                       |
| Indel-45               | ECs1332 |        | -      | putative colicin immunity protein          |
| Indel-45               | ECs1333 | Z1594  | -      | putative membrane protein                  |
| Indel-45               | ECs1334 |        | -      | hypothetical protein                       |
| Indel-45               |         | Z1595  | -      | hypothetical protein                       |
| Indel-45               |         | Z1596  | -      | hypothetical protein                       |
| Indel-45               | ECs1335 |        | -      | hypothetical protein                       |
| Indel-45               | ECs1336 | Z1597  | -      | hypothetical protein                       |
| Indel-45               | ECs1337 | Z1598  | -      | hypothetical protein                       |
| Indel-45               | ECs1338 | Z1599  | -      | hypothetical protein                       |
| Indel-45               | ECs1339 | Z1600  | -      | hypothetical protein                       |
| Indel-45               | ECs1340 | Z1601  | -      | hypothetical protein                       |
| Indel-45               | ECs1341 | Z1602  | -      | hypothetical protein                       |
| Indel-45               | ECs1342 |        | -      | hypothetical protein                       |
| Indel-45               | ECs1343 | Z1603  | terW_2 | TerW protein                               |
| Indel-45               | ECs1344 | Z1604  | -      | hypothetical protein                       |
| Indel-45               | ECs1345 | Z1605  | -      | hypothetical protein                       |
| Indel-45               | ECs1346 | Z1606  | -      | hypothetical protein                       |
| Indel-45               | ECs1347 | Z1606  | -      | hypothetical protein                       |
| Indel-45               | ECs1348 | Z1607  | -      | hypothetical protein                       |
| Indel-45               | ECs1349 | Z1608  | -      | hypothetical protein                       |
| Indel-45               | ECs1350 | Z1609  | -      | hypothetical protein                       |
| Indel-45               | ECs1351 | Z1610  | terZ_2 | putative tellurium resistance protein TerZ |
| Indel-45               | ECs1352 | Z1611  | terA_2 | putative tellurium resistance protein TerA |
| Indel-45               | ECs1353 | Z1612  | terB_2 | putative tellurium resistance protein TerB |
| Indel-45               | ECs1354 | Z1613  | terC_2 | putative tellurium resistance protein TerC |
| Indel-45               | ECs1355 | Z1614  | terD_2 | putative tellurium resistance protein TerD |
| Indel-45               | ECs1356 | Z1615  | terE_2 | putative tellurium resistance TerE         |
| Indel-45               | ECs1357 |        | -      | hypothetical protein                       |
| Indel-45               | ECs1358 | Z1616  | terF_2 | putative tellurium resistance protein TerF |

Table S10. The orthologue table of the O55 and O157 strains Page 44

| Locus_tag <sup>a</sup> |         |        | Gene | Product                                                       |
|------------------------|---------|--------|------|---------------------------------------------------------------|
| CB9615                 | Sakai   | EDL933 |      |                                                               |
| Indel-45               | ECs1359 |        | -    | hypothetical protein                                          |
| Indel-45               | ECs1360 | Z1617  | -    | lha adhesin                                                   |
| Indel-45               |         | Z1618  | -    | hypothetical protein                                          |
| Indel-45               |         | Z1619  | -    | hypothetical protein                                          |
| Indel-45               | ECs1361 |        | -    | hypothetical protein                                          |
| Indel-45               | ECsp010 |        | -    | ShiA                                                          |
| Indel-45               | ECs1362 | Z1620  | -    | hypothetical protein                                          |
| Indel-45               |         | Z1621  | -    | hypothetical protein                                          |
| Indel-45               | ECsp011 | Z1622  | -    | hypothetical protein                                          |
| Indel-45               | ECsp012 | Z1622  | -    | hypothetical protein                                          |
| Indel-45               | ECs1363 |        | -    | hypothetical protein                                          |
| Indel-45               | ECsp013 |        | -    | transposase OrfB                                              |
| Indel-45               |         | Z1623  | -    | hypothetical protein                                          |
| Indel-45               | ECs1364 | Z1624  | -    | hypothetical protein                                          |
| Indel-45               | ECs1365 |        | -    | hypothetical protein                                          |
| Indel-45               | ECs1366 | Z1625  | -    | hypothetical protein                                          |
| Indel-45               | ECs1367 | Z1626  | -    | hypothetical protein                                          |
| Indel-45               | ECs1368 |        | -    | hypothetical protein                                          |
| Indel-45               |         | Z1627  | -    | hypothetical protein                                          |
| Indel-45               | ECs1369 |        | -    | hypothetical protein                                          |
| Indel-45               |         | Z1628  | -    | hypothetical protein                                          |
| Indel-45               | ECs1370 | Z1629  | -    | putative glucosyl-transferase                                 |
| Indel-45               | ECs1370 | Z1630  | -    | putative glucosyl-transferase                                 |
| Indel-45               | ECs1371 | Z1631  | -    | ferric enterochelin esterase                                  |
| Indel-45               | ECs1372 | Z1632  | -    | transposase                                                   |
| Indel-45               | ECs1373 |        | -    | InsA protein of insertion sequence IS1                        |
| Indel-45               | ECs1374 | Z1633  | -    | putative membrane protein                                     |
| Indel-45               | ECs1375 |        | -    | hypothetical protein                                          |
| Indel-45               | ECs1376 | Z1634  | -    | hypothetical protein                                          |
| Indel-45               | ECs1377 | Z1635  | -    | hypothetical protein                                          |
| Indel-45               | ECs1378 | Z1636  | -    | hypothetical protein                                          |
| Indel-45               | ECs1379 |        | -    | hypothetical protein                                          |
| Indel-45               |         | Z1637  | -    | hypothetical protein                                          |
| Indel-45               | ECs1380 | Z1638  | -    | putative transposase OrfB protein of insertion sequence IS629 |
| Indel-45               | ECs1381 | Z1639  | -    | putative transposase OrfA protein of insertion sequence IS629 |
| Indel-45               | ECs1382 | Z1640  | -    | HecB-like protein                                             |
| Indel-45               | ECs1383 | Z1641  | -    | hypothetical protein                                          |
| Indel-45               | ECs1384 | Z1642  | -    | hypothetical protein                                          |
| Indel-45               | ECs1385 |        | -    | hypothetical protein                                          |
| Indel-45               | ECs1386 | Z1643  | -    | hypothetical protein                                          |
| Indel-45               | ECs1387 | Z1644  | -    | hypothetical protein                                          |
| Indel-45               | ECs1388 |        | -    | putative transcriptional regulator                            |

Table S10. The orthologue table of the O55 and O157 strains Page 45

| Locus_tag <sup>a</sup> |          |        | Gene | Product                                                      |
|------------------------|----------|--------|------|--------------------------------------------------------------|
| CB9615                 | Sakai    | EDL933 |      |                                                              |
| Indel-45               | ECs1389  | Z1645  | -    | hypothetical protein                                         |
| Indel-45               | ECs1390  | Z1646  | -    | hypothetical protein                                         |
| Indel-45               | ECs1391  |        | -    | BfpM-like protein                                            |
| Indel-45               |          | Z1647  | -    | partial transposase                                          |
| Indel-45               | ECs1392  |        | -    | hypothetical protein                                         |
| Indel-45               | ECs1393  | Z1648  | -    | hypothetical protein                                         |
| Indel-45               | ECs1394  | Z1649  | -    | hypothetical protein                                         |
| Indel-45               | ECs1395  | Z1650  | -    | hypothetical protein                                         |
| Indel-45               | ECs1396  | Z1651  | -    | AidA-I adhesin-like protein                                  |
| Indel-45               | ECs1397  | Z1652  | -    | hypothetical protein                                         |
| Indel-45               | ECs1398  | Z1653  | -    | hypothetical protein                                         |
| Indel-45               | ECs1399  | Z1654  | -    | hypothetical protein                                         |
| Indel-45               | ECs1400  |        | -    | hypothetical protein                                         |
| Indel-45               | ECs1401  | Z1655  | -    | hypothetical protein                                         |
| Indel-45               | ECs1402  | Z1656  | -    | hypothetical protein                                         |
| Indel-45               | ECs1403  | Z1657  | -    | putative DNA repair protein                                  |
| Indel-45               | ECs1404  |        | -    | hypothetical protein                                         |
| Indel-45               | ECs1405  | Z1658  | -    | hypothetical protein                                         |
| Indel-47               | ECs1406  |        | -    | hypothetical protein                                         |
| Indel-46               | Indel-46 | Z1660  | -    | transposase for IS629                                        |
| Indel-46               | Indel-46 | Z1661  | -    | unknown protein encoded by IS629                             |
| Indel-47               | ECs1407  | Z1662  | -    | hypothetical protein                                         |
| Indel-47               | ECs1408  | Z1663  | -    | hypothetical protein                                         |
| Indel-47               | ECs1409  | Z1664  | -    | hypothetical protein                                         |
| G2583_1290             | serX     | RNA031 | serX | Ser tRNA                                                     |
| G2583_1291             | ECs1410  | Z1666  | ghrA | Putative dehydrogenase                                       |
| G2583_1292             | ECs1411  | Z1667  | ycdX | Putative hydrolase ycdX                                      |
| G2583_1293             | ECs1412  | Z1668  | ycdY | Chaperone, TorD family                                       |
| G2583_1294             | ECs1413  | Z1669  | ycdZ | hypothetical protein                                         |
| G2583_1295             | ECs1414  | Z1670  | csgG | Curli production assembly/transport component csgG precursor |
| G2583_1296             | ECs1415  | Z1671  | csgF | Curli production assembly/transport component csgF precursor |
| G2583_1297             | ECs1416  | Z1672  | csgE | Curli production assembly/transport component csgE precursor |
| G2583_1298             | ECs1417  | Z1673  | csgD | CsgD                                                         |
| G2583_1299             | ECs1418  |        | -    | hypothetical protein                                         |
| G2583_1300             | ECs1419  | Z1675  | csgB | Minor curlin subunit                                         |
| G2583_1301             | ECs1420  | Z1676  | csgA | Major curlin subunit precursor                               |
| G2583_1302             | ECs1421  | Z1677  | csgC | CsgC                                                         |
| G2583_1303             | ECs1422  | Z1678  | ymdA | hypothetical protein                                         |
| G2583_1304             | ECs1423  | Z1679  | ymdB | UPF0189 protein ymdB                                         |
| G2583_1305             | ECs1424  | Z1680  | ymdC | Putative synthase                                            |
| G2583_1306             | ECs1425  | Z1681  | mdoC | Glucans biosynthesis protein C                               |

Table S10. The orthologue table of the O55 and O157 strains Page 46

| Locus_tag <sup>a</sup> |         |        | Gene | Product                                                         |
|------------------------|---------|--------|------|-----------------------------------------------------------------|
| CB9615                 | Sakai   | EDL933 |      |                                                                 |
| G2583_1307             | ECs1426 | Z1683  | mdoG | Glucans biosynthesis protein G precursor                        |
| G2583_1308             | ECs1427 | Z1684  | mdoH | Periplasmic glucans biosynthesis protein MdoH                   |
| G2583_1309             | ECs1428 | Z1685  | yceK | hypothetical protein                                            |
| G2583_1310             | ECs1429 | Z1686  | msyB | Acidic protein MsyB                                             |
| G2583_1311             | ECs1430 | Z1687  | -    | hypothetical protein                                            |
| G2583_1312             | ECs1431 | Z1688  | mdtG | Multidrug resistance protein mdtG                               |
| G2583_1313             | ECs1432 | Z1690  | lpxL | Heat shock protein                                              |
| G2583_1314             | ECs1433 | Z1691  | yceA | UPF0176 protein yceA                                            |
| G2583_1315             | ECs1434 | Z1692  | yceI | hypothetical protein                                            |
| G2583_1316             | ECs1435 | Z1693  | yceJ | Nickel-dependent hydrogenase b-type cytochrome                  |
| G2583_1317             | ECs1436 | Z1695  | yceO | hypothetical protein                                            |
| G2583_1318             | ECs1437 | Z1696  | solA | N-methyl-L-tryptophan oxidase                                   |
| G2583_1319             | ECs1438 | Z1697  | bssS | hypothetical protein                                            |
| G2583_1320             | ECs1439 | Z1698  | dinI | DinI                                                            |
| G2583_1321             | ECs1440 | Z1699  | pyrC | Dihydroorotase                                                  |
| G2583_1322             | ECs1441 | Z1700  | yceB | Putative lipoprotein yceB                                       |
| G2583_1323             | ECs1442 | Z1701  | grxB | Glutaredoxin-2                                                  |
| G2583_1324             | ECs1443 | Z1702  | mdtH | Multidrug resistance protein mdtH                               |
| G2583_1325             | ECs1444 | Z1703  | rimJ | Ribosomal-protein-alanine acetyltransferase                     |
| G2583_1326             | ECs1445 | Z1704  | yceH | UPF0502 protein yceH                                            |
| G2583_1327             | ECs1446 | Z1705  | yceM | Oxidoreductase family, NAD-binding                              |
| G2583_1328             | ECs1447 | Z1707  | yceN | Virulence factor mviN homolog                                   |
| G2583_1329             | ECs1448 | Z1708  | flgN | Flagellar biosynthesis/type III secretory path way<br>chaperone |
| G2583_1330             | ECs1449 | Z1709  | flgM | Negative regulator of flagellin synthesis                       |
| G2583_1331             | ECs1450 | Z1710  | flgA | Flagellar biosynthesis                                          |
| G2583_1332             | ECs1451 | Z1711  | flgB | Flagellar basal-body rod protein FlgB                           |
| G2583_1333             | ECs1452 | Z1712  | flgC | Cell-proximal portion of basal-body rod                         |
| G2583_1334             | ECs1453 | Z1713  | flgD | Flagellar hook protein FlgE                                     |
| G2583_1335             | ECs1454 | Z1714  | flgE | Flagellar hook protein FlgE                                     |
| G2583_1336             | ECs1455 | Z1715  | flgF | Flagellar basal-body rod protein FlgF                           |
| G2583_1337             | ECs1456 | Z1716  | flgG | Flagellar basal-body rod protein flgG                           |
| G2583_1338             | ECs1457 | Z1717  | flgH | Flagellar L-ring protein precursor                              |
| G2583_1339             | ECs1458 | Z1718  | flgI | flagellar basal body P-ring protein                             |
| G2583_1340             | ECs1459 | Z1719  | flgJ | Peptidoglycan hydrolase flgJ                                    |
| G2583_1341             | ECs1460 | Z1720  | flgK | Flagellar hook-associated protein FlgK                          |
| G2583_1342             | ECs1461 | Z1721  | flgL | Flagellar hook-associated protein 3                             |
| G2583_1343             | ECs1462 | Z1722  | rne  | Ribonuclease, Rne/Rng family                                    |
| G2583_1344             | ECs1463 | Z1724  | yceQ | hypothetical protein                                            |
| G2583_1345             | ECs1464 | Z1725  | rluC | Ribosomal large subunit pseudouridine synthase C                |
| G2583_1346             | ECs1465 | Z1726  | yceF | Septum formation protein Maf                                    |
| G2583_1347             |         |        | sraB | ncRNA                                                           |
| G2583_1348             | ECs1466 | Z1727  | yceD | hypothetical protein                                            |
| G2583_1349             | ECs1467 | Z1728  | rpmF | 50S ribosomal protein L32                                       |

Table S10. The orthologue table of the O55 and O157 strains Page 47

| Locus_tag <sup>a</sup> |         |        | Gene | Product                                                         |
|------------------------|---------|--------|------|-----------------------------------------------------------------|
| CB9615                 | Sakai   | EDL933 |      |                                                                 |
| G2583_1350             | ECs1468 | Z1729  | plsX | fatty acid/phospholipid synthesis protein                       |
| G2583_1351             | ECs1469 | Z1730  | fabH | 3-oxoacyl-[acyl-carrier-protein] synthase 3                     |
| G2583_1352             | ECs1470 | Z1731  | fabD | Malonyl CoA-acyl carrier protein transacylase                   |
| G2583_1353             | ECs1471 | Z1732  | fabG | 3-oxoacyl-[acyl-carrier-protein] reductase                      |
| G2583_1354             | ECs1472 | Z1733  | acpP | Acyl carrier protein                                            |
| G2583_1355             | ECs1473 | Z1734  | fabF | 3-oxoacyl-[acyl-carrier-protein] synthase 2                     |
| G2583_1356             | ECs1474 | Z1735  | pabC | Aminodeoxychorismate lyase                                      |
| G2583_1357             | ECs1475 | Z1736  | yceG | Putative thymidylate kinase                                     |
| G2583_1358             | ECs1476 | Z1737  | tmk  | Thymidylate kinase                                              |
| G2583_1359             | ECs1477 | Z1738  | holB | DNA polymerase III, delta' subunit                              |
| G2583_1360             | ECs1478 | Z1739  | ycfH | Hydrolase, TatD family                                          |
| G2583_1361             | ECs1479 | Z1740  | ptsG | hypothetical protein                                            |
| G2583_1362             | ECs1480 | Z1741  | fhuE | Outer membrane receptor for ferric iron uptake                  |
| G2583_1363             | ECs1481 | Z1742  | hinT | hypothetical protein                                            |
| G2583_1364             | ECs1482 | Z1743  | ycfL | Putative outer membrane lipoprotein YcfL                        |
| G2583_1365             | ECs1483 | Z1744  | ycfM | hypothetical protein                                            |
| G2583_1366             | ECs1484 | Z1745  | thiK | Thiamine kinase                                                 |
| G2583_1367             | ECs1485 | Z1746  | nagZ | Beta-hexosaminidase                                             |
| G2583_1368             | ECs1486 | Z1747  | ycfP | hypothetical protein                                            |
| G2583_1369             | ECs1487 | Z1748  | ndh  | NADH dehydrogenase                                              |
| G2583_1370             | ECs1488 | Z1749  | ycfJ | Surface antigen domain protein                                  |
| G2583_1371             | ECs1489 | Z1750  | ycfQ | hypothetical protein                                            |
| G2583_1372             | ECs1490 | Z1751  | bhsA | Putative outer membrane protein                                 |
| G2583_1373             | ECs1491 | Z1752  | ycfS | hypothetical protein                                            |
| G2583_1374             | ECs1492 | Z1754  | mfd  | transcription-repair coupling factor                            |
| G2583_1375             | ECs1493 | Z1756  | ycfT | hypothetical protein                                            |
| G2583_1376             | ECs1494 | Z1757  | lolC | outer membrane-specific lipoprotein transporter subunit<br>LoIC |
| G2583_1377             | ECs1495 | Z1758  | lolD | ABC transporter, ATP-binding protein                            |
| G2583_1378             | ECs1496 | Z1759  | lolE | Lipoprotein releasing system, transmembrane protein             |
| G2583_1379             | ECs1497 | Z1760  | nagK | N-acetyl-D-glucosamine kinase                                   |
| G2583_1380             | ECs1498 | Z1761  | cobB | NAD-dependent deacetylase                                       |
| G2583_1381             | ECs1499 | Z1762  | potD | Spermidine/putrescine-binding periplasmic protein<br>precursor  |
| G2583_1382             | ECs1500 | Z1763  | potC | Spermidine/putrescine transport system permease                 |
| Indel-48               | ECs1501 | Z1764  | intN | putative integrase                                              |
| Indel-48               | ECs1502 | Z1765  | xisN | putative excisionase                                            |
| Indel-48               | ECs1503 | Z1766  | -    | hypothetical protein                                            |
| Indel-48               | ECs1504 | Z1768  | -    | hypothetical protein                                            |
| Indel-48               | ECs1505 | Z1769  | -    | hypothetical protein                                            |
| Indel-48               | ECs1506 | Z1770  | -    | putative phage repressor                                        |
| Indel-48               | ECs1507 | Z1771  | -    | hypothetical protein                                            |
| Indel-48               | ECs1508 | Z1772  | -    | hypothetical protein                                            |
| Indel-48               | ECs1509 | Z1773  | -    | hypothetical protein                                            |

Table S10. The orthologue table of the O55 and O157 strains Page 48

| Locus_tag <sup>a</sup> |          |          | Gene | Product                                           |
|------------------------|----------|----------|------|---------------------------------------------------|
| CB9615                 | Sakai    | EDL933   |      |                                                   |
| Indel-48               | ECs1510  | Z1774    | -    | putative replication protein                      |
| Indel-48               | ECs1511  | Z1775    | -    | hypothetical protein                              |
| Indel-48               | ECs1512  | Z1776    | -    | hypothetical protein                              |
| Indel-48               | ECs1513  | Z1777    | -    | hypothetical protein                              |
| Indel-48               | ECs1514  | Z1778    | -    | hypothetical protein                              |
| Indel-48               | ECs1515  | Z1779    | -    | hypothetical protein                              |
| Indel-48               | ECs1516  | Z1780    | -    | hypothetical protein                              |
| Indel-48               | ECs1517  |          | -    | hypothetical protein                              |
| Indel-48               | ECs1518  | Z1781    | -    | hypothetical protein                              |
| Indel-48               |          | Z1782    | -    | unknown protein encoded by prophage CP-933N       |
| Indel-48               | ECs1519  |          | -    | hypothetical protein                              |
| Indel-48               | ECs1520  | Z1783    | -    | prophage maintenance protein                      |
| Indel-48               | ECs1521  |          | -    | hypothetical protein                              |
| Indel-48               | ECs1522  | Z1784    | -    | hypothetical protein                              |
| Indel-48               | ECs1523  | Z1785    | -    | putative crossover junction endodeoxyribonuclease |
| Indel-49               | ECs1524  | Indel-49 | -    | putative antitermination protein                  |
| Indel-49               | ECs1526  | Indel-49 | -    | hypothetical protein                              |
| Indel-49               | ECs1525  | Indel-49 | -    | hypothetical protein                              |
| Indel-49               | ECs1527  | Indel-49 | -    | hypothetical protein                              |
| Indel-49               | ECs1528  | Indel-49 | -    | hypothetical protein                              |
| Indel-49               | ECs1529  | Indel-49 | -    | hypothetical protein                              |
| Indel-49               | ECs1530  | Indel-49 | -    | putative holin                                    |
| Indel-49               | ECs1531  | Indel-49 | -    | hypothetical protein                              |
| Indel-49               | ECs1532  | Indel-49 | -    | putative endolysin                                |
| Indel-49               | ECs1533  | Indel-49 | -    | antirepressor protein                             |
| Indel-49               | ECs1534  | Indel-49 | -    | putative endopeptidase                            |
| Indel-49               | ECs1535  | Indel-49 | -    | putative lipoprotein Rz1 precursor                |
| Indel-49               | ECs1536  | Indel-49 | -    | hypothetical protein                              |
| Indel-49               | ECs1537  | Indel-49 | -    | hypothetical protein                              |
| Indel-49               | ECs1538  | Indel-49 | -    | hypothetical protein                              |
| Indel-49               | ECs1539  | Indel-49 | -    | hypothetical protein                              |
| Indel-49               | ECs1540  | Indel-49 | -    | putative Dnase                                    |
| Indel-49               | ECs1541  | Indel-49 | -    | putative terminase small subunit                  |
| Indel-49               | ECs1542  | Indel-49 | -    | putative large terminase subunit                  |
| Indel-49               | ECs1543  | Indel-49 | -    | putative major head protein/prohead proteinase    |
| Indel-49               | ECs1544  | Indel-49 | -    | putative portal protein                           |
| Indel-49               | ECs1545  | Indel-49 | -    | hypothetical protein                              |
| Indel-49               | ECs1546  | Indel-49 | -    | putative head-tail adaptor                        |
| Indel-49               | ECs1547  | Indel-49 | -    | hypothetical protein                              |
| Indel-49               | ECs1548  | Indel-49 | -    | hypothetical protein                              |
| Indel-49               | ECs1549  | Indel-49 | -    | putative major tail subunit                       |
| Indel-51               | ECs1550  |          | -    | putative tail assembly chaperone                  |
| Indel-50               | Indel-50 | Z1786    | -    | putative Q antiterminator of prophage CP-933N     |
| Indel-50               | Indel-50 | Z1787    | -    | unknown protein encoded by prophage CP-933N       |



Table S10. The orthologue table of the O55 and O157 strains Page 49

| Locus_tag <sup>a</sup> |          |          | Gene | Product                                                            |
|------------------------|----------|----------|------|--------------------------------------------------------------------|
| CB9615                 | Sakai    | EDL933   |      |                                                                    |
| Indel-50               | Indel-50 | Z1788    | -    | unknown protein encoded by prophage CP-933N                        |
| Indel-50               | Indel-50 | Z1789    | -    | putative envelope protein encoded within prophage CP-933N          |
| Indel-50               | Indel-50 | Z1793    | -    | unknown protein encoded by prophage CP-933N                        |
| Indel-50               | Indel-50 | Z1794    | -    | putative holin protein                                             |
| Indel-50               | Indel-50 | Z1795    | -    | unknown protein encoded by prophage CP-933N                        |
| Indel-50               | Indel-50 | Z1796    | -    | putative endolysin of prophage CP-933N                             |
| Indel-50               | Indel-50 | Z1797    | -    | putative antirepressor of prophage CP-933N                         |
| Indel-50               | Indel-50 | Z1798    | -    | putative endopeptidase of prophage CP-933N                         |
| Indel-50               | Indel-50 | Z1799    | -    | partial tonB-like membrane protein encoded within prophage CP-933N |
| Indel-50               | Indel-50 | Z1800    | -    | unknown protein encoded by prophage CP-933N                        |
| Indel-50               | Indel-50 | Z1802    | -    | unknown protein encoded by prophage CP-933N                        |
| Indel-50               | Indel-50 | Z1803    | -    | putative terminase encoded by prophage CP-933N                     |
| Indel-50               | Indel-50 | Z1804    | -    | unknown protein encoded by prophage CP-933N                        |
| Indel-50               | Indel-50 | Z1805    | -    | unknown protein encoded by prophage CP-933N                        |
| Indel-50               | Indel-50 | Z1806    | -    | unknown protein encoded by prophage CP-933N                        |
| Indel-50               | Indel-50 | Z1807    | -    | unknown protein encoded by prophage CP-933N                        |
| Indel-50               | Indel-50 | Z1808    | -    | unknown protein encoded by prophage CP-933N                        |
| Indel-50               | Indel-50 | Z1809    | -    | unknown protein encoded by prophage CP-933N                        |
| Indel-50               | Indel-50 | Z1810    | -    | unknown protein encoded by prophage CP-933N                        |
| Indel-50               | Indel-50 | Z1811    | -    | putative tail component encoded by prophage CP-933N                |
| Indel-51               | ECs1551  | Z1813    | -    | putative phage tail protein                                        |
| Indel-51               | ECs1552  | Z1814    | -    | putative tail length tape measure protein                          |
| Indel-51               | ECs1553  | Z1814    | -    | putative tail length tape measure protein                          |
| Indel-52               | ECs1554  | Indel-52 | -    | putative minor tail protein                                        |
| Indel-54               | ECs1555  |          | -    | putative minor tail protein                                        |
| Indel-54               | ECs1556  |          | -    | putative regulatory protein                                        |
| Indel-54               |          | Z1816    | -    | unknown protein encoded by prophage CP-933N                        |
| Indel-54               |          | Z1817    | -    | unknown protein encoded by prophage CP-933N                        |
| Indel-54               | ECs1557  | Z1818    | -    | putative antirepressor protein                                     |
| Indel-54               | ECs1558  | Z1819    | -    | putative tail assembly protein                                     |
| Indel-54               | ECs1559  | Z1820    | -    | putative tail assembly protein                                     |
| Indel-54               |          | Z1821    | -    | unknown protein encoded by prophage CP-933N                        |
| Indel-54               | ECs1560  | Z1822    | -    | putative secreted effector protein                                 |
| Indel-54               | ECs1561  | Z1823    | -    | hypothetical protein                                               |
| Indel-54               | ECs1561  | Z1824    | -    | hypothetical protein                                               |
| Indel-54               | ECs1562  |          | -    | hypothetical protein                                               |
| Indel-54               | ECs1563  |          | -    | hypothetical membrane protein                                      |
| Indel-54               | ECs1564  | Z1825    | -    | putative transposase OrfB protein of insertion sequence IS2        |
| Indel-54               | ECs1565  | Z1826    | -    | putative transposase OrfA protein of insertion sequence IS2        |
| Indel-54               |          | Z1827    | -    | putative IS encoded protein                                        |

Table S10. The orthologue table of the O55 and O157 strains Page 50

| Locus_tag <sup>a</sup> |          |          | Gene | Product                                                      |
|------------------------|----------|----------|------|--------------------------------------------------------------|
| CB9615                 | Sakai    | EDL933   |      |                                                              |
| Indel-54               | ECs1566  |          | -    | hypothetical protein                                         |
| Indel-54               | ECs1567  |          | -    | hypothetical protein                                         |
| Indel-54               | ECs1568  | Z1829    | -    | hypothetical protein                                         |
| Indel-54               | ECs1569  |          | -    | hypothetical protein                                         |
| G2583_1383             | ECs1570  | Z1830    | potB | Spermidine/putrescine ABC transporter, permease protein PotB |
| G2583_1384             | ECs1571  | Z1831    | potA | Spermidine/putrescine import ATP-binding protein potA        |
| G2583_1385             | ECs1572  | Z1832    | pepT | Peptidase T                                                  |
| G2583_1386             | ECs1573  | Z1833    | ycfD | YcfD protein                                                 |
| G2583_1387             | ECs1574  | Z1835    | -    | Site-specific recombinase, phage integrase family            |
|                        |          | Z1836    | -    | unknown protein encoded by prophage CP-933C                  |
| G2583_1388             | ECs1575  |          | -    | putative DNA binding protein                                 |
| G2583_1389             |          | Z1838    | -    | unknown protein encoded by prophage CP-933C                  |
| Indel-55               |          | Z1839    | -    | unknown protein encoded by prophage CP-933C                  |
| Indel-55               | ECs1577  |          | -    | lcd-like protein                                             |
| Indel-55               | ECs1578  | Z1840    | -    | hypothetical protein                                         |
| Indel-55               | ECs1579  |          | -    | hypothetical protein                                         |
| Indel-55               | ECs1580  | Z1841    | -    | hypothetical protein                                         |
| Indel-55               | ECs1581  |          | -    | hypothetical protein                                         |
| Indel-55               | ECs1582  | Z1842    | -    | hypothetical protein                                         |
| Indel-55               | ECs1583  | Z1843    | -    | hypothetical protein                                         |
| Indel-55               | ECs1584  | Z1843    | -    | hypothetical protein                                         |
| Indel-55               | ECs1585  |          | -    | hypothetical protein                                         |
| Indel-55               | ECs1586  | Z1844    | -    | hypothetical protein                                         |
| Indel-55               | ECs1587  | Z1845    | -    | putative single stranded DNA-binding protein                 |
| Indel-55               | ECs1588  |          | -    | putative transcriptional activator                           |
| Indel-55               | ECs1589  | Z1846    | -    | hypothetical protein                                         |
| Indel-55               | ECs1590  | Z1847    | -    | putative major head protein                                  |
| Indel-55               | ECs1591  | Z1848    | -    | putative prohead protease                                    |
| Indel-55               | ECs1592  | Z1849    | -    | putative head portal protein                                 |
| Indel-55               | ECs1593  |          | -    | putative head-tail adaptor                                   |
| Indel-55               |          | Z1850    | -    | unknown protein encoded by prophage CP-933C                  |
| Indel-55               | ECs1594  | Z1851    | -    | hypothetical protein                                         |
| Indel-55               | ECs1595  | Z1852    | -    | hypothetical protein                                         |
| Indel-55               | ECs1596  |          | -    | hypothetical protein                                         |
| Indel-55               | ECs1597  | Z1853    | -    | putative terminase small subunit                             |
| Indel-55               | ECs1598  | Z1854    | -    | putative terminase large subunit                             |
| Indel-55               | ECs1599  | Z1855    | -    | hypothetical protein                                         |
| Indel-55               |          | Z1856    | -    | unknown protein encoded by prophage CP-933C                  |
| Indel-55               | ECs1600  | Z1857    | -    | hypothetical protein                                         |
| G2583_1390             | Indel-56 | Indel-56 | -    | conserved hypothetical protein                               |
| G2583_1391             | Indel-56 | Indel-56 | -    | hypothetical protein                                         |
| G2583_1392             | Indel-56 | Indel-56 | -    | hypothetical protein                                         |
| G2583_1393             | Indel-56 | Indel-56 | -    | hypothetical protein                                         |

Table S10. The orthologue table of the O55 and O157 strains Page 51

| Locus_tag <sup>a</sup> |          |          | Gene | Product                                                                                            |
|------------------------|----------|----------|------|----------------------------------------------------------------------------------------------------|
| CB9615                 | Sakai    | EDL933   |      |                                                                                                    |
| G2583_1394             | Indel-56 | Indel-56 | -    | hypothetical protein                                                                               |
| G2583_1395             | Indel-56 | Indel-56 | -    | hypothetical protein                                                                               |
| G2583_1396             | Indel-56 | Indel-56 | YabA | Bacteriophage P4 DNA primase                                                                       |
| G2583_1397             | Indel-56 | Indel-56 | -    | hypothetical bacteriophage protein                                                                 |
| G2583_1398             | Indel-56 | Indel-56 | -    | Single-stranded DNA-binding protein                                                                |
| G2583_1399             | Indel-56 | Indel-56 | -    | hypothetical protein                                                                               |
| G2583_1400             | Indel-56 | Indel-56 | -    | Major capsid protein                                                                               |
| G2583_1401             | Indel-56 | Indel-56 | -    | Capsid protein small subunit                                                                       |
| G2583_1402             | Indel-56 | Indel-56 | -    | hypothetical protein                                                                               |
| G2583_1403             | Indel-56 | Indel-56 | -    | Phage DNA packaging protein NU1-like protein                                                       |
| G2583_1404             | Indel-56 | Indel-56 | -    | Hypothetical bacteriophage protein                                                                 |
| G2583_1405             | ECs1601  | Z1858    | phoQ | sensor protein PhoQ                                                                                |
| G2583_1406             | ECs1602  | Z1859    | phoP | DNA-binding response regulator in two-component regulatory system with PhoQ                        |
| G2583_1407             | ECs1603  | Z1860    | purB | Adenylosuccinate lyase                                                                             |
| G2583_1408             | ECs1604  | Z1861    | hflD | hypothetical protein                                                                               |
| G2583_1409             | ECs1605  | Z1862    | mnmA | Predicted tRNA(5-methylaminomethyl-2-thiouridylate) methyltransferase, contains the PP-loop ATPase |
| G2583_1410             | ECs1606  | Z1863    | nudJ | Phosphatase nudJ                                                                                   |
| G2583_1411             | ECs1607  | Z1864    | rluE | Ribosomal large subunit pseudouridine synthase E                                                   |
| G2583_1412             | ECs1608  | Z1865    | icd  | Isocitrate dehydrogenase [NADP]                                                                    |
| Indel-57               | ECs1609  | Z1866    | -    | integrase                                                                                          |
| Indel-57               | ECs1610  | Z1867    | -    | excisionase                                                                                        |
| Indel-57               | ECs1611  | Z1868    | -    | putative replication protein                                                                       |
| Indel-57               | ECs1612  | Z1869    | -    | replication protein P                                                                              |
| Indel-57               | ECs1613  |          | -    | Ren protein                                                                                        |
| Indel-57               | ECs1614  | Z1870    | -    | integral membrane drug resistance protein EmrE                                                     |
| Indel-57               | ECs1615  | Z1871    | -    | hypothetical protein                                                                               |
| Indel-57               | ECs1616  | Z1872    | ybcN | hypothetical protein                                                                               |
| Indel-57               | ECs1617  |          | -    | NinE protein                                                                                       |
| Indel-57               | ECs1618  |          | -    | hypothetical protein                                                                               |
| Indel-57               | ECs1619  | Z1873    | rus  | putative crossover junction endodeoxyribonuclease                                                  |
| Indel-57               | ECs1620  | Z1874    | -    | antitermination protein                                                                            |
| Indel-57               | ECs1621  | Z1875    | -    | putative holin protein                                                                             |
| Indel-57               | ECs1622  | Z1876    | -    | putative endolysin                                                                                 |
| Indel-57               | ECs1623  | Z1877    | -    | putative endopeptidase                                                                             |
| Indel-57               | ECs1624  |          | -    | lipoprotein Rz1 precursor                                                                          |
| Indel-57               | ECs1625  | Z1878    | -    | Bor protein precursor                                                                              |
| Indel-57               | ECs1626  | Z1879    | -    | hypothetical protein                                                                               |
| Indel-57               | ECs1627  | Z1880    | -    | hypothetical protein                                                                               |
| Indel-57               | ECs1628  | Z1881    | -    | hypothetical protein                                                                               |
| Indel-57               | ECs1629  | Z1882    | -    | terminase small subunit                                                                            |
| Indel-57               | ECs1630  | Z1883    | -    | terminase large subunit                                                                            |
| Indel-57               | ECs1631  | Z1884    | -    | head-to-tail joining protein                                                                       |

Table S10. The orthologue table of the O55 and O157 strains Page 52

| Locus_tag <sup>a</sup> |          |          | Gene | Product                                               |
|------------------------|----------|----------|------|-------------------------------------------------------|
| CB9615                 | Sakai    | EDL933   |      |                                                       |
| Indel-57               | ECs1632  | Z1885    | -    | portal protein                                        |
| Indel-57               | ECs1633  | Z1886    | -    | minor capsid protein                                  |
| Indel-57               | ECs1634  | Z1887    | -    | major capsid protein                                  |
| Indel-57               | ECs1635  | Z1888    | -    | major capsid protein                                  |
| Indel-57               | ECs1636  | Z1889    | -    | DNA packaging protein                                 |
| Indel-57               | ECs1637  | Z1890    | -    | minor capsid protein                                  |
| Indel-57               | ECs1638  | Z1891    | -    | minor tail protein                                    |
| Indel-57               | ECs1639  | Z1893    | -    | minor tail protein                                    |
| Indel-57               | ECs1640  | Z1894    | -    | major tail protein                                    |
| Indel-57               | ECs1641  | Z1895    | -    | minor tail protein                                    |
| Indel-57               | ECs1642  | Z1896    | -    | minor tail protein                                    |
| Indel-57               | ECs1643  | Z1898    | -    | tail length tape measure protein precursor            |
| Indel-58               | ECs1644  | Indel-58 | -    | minor tail protein                                    |
| Indel-58               | ECs1645  | Indel-58 | -    | minor tail protein                                    |
| Indel-58               | ECs1646  | Indel-58 | -    | tail assembly protein                                 |
| Indel-58               | ECs1647  | Indel-58 | -    | tail assembly protein                                 |
| Indel-58               | ECs1648  | Indel-58 | -    | host specificity protein                              |
| Indel-60               | ECs1649  |          | -    | putative membrane protein precursor                   |
| Indel-59               | Indel-59 | Z1901    | -    | unknown protein encoded by prophage CP-933X           |
| Indel-59               | Indel-59 | Z1902    | -    | putative head-tail adaptor of prophage CP-933X        |
| Indel-59               | Indel-59 | Z1903    | -    | unknown protein encoded by prophage CP-933X           |
| Indel-59               | Indel-59 | Z1905    | -    | unknown protein encoded by prophage CP-933X           |
| Indel-59               | Indel-59 | Z1906    | -    | unknown protein encoded by prophage CP-933X           |
| Indel-59               | Indel-59 | Z1908    | -    | putative tail component of prophage CP-933X           |
| Indel-59               | Indel-59 | Z1910    | -    | unknown protein encoded by prophage CP-933X           |
| Indel-59               | Indel-59 | Z1912    | -    | unknown protein encoded by prophage CP-933X           |
| Indel-59               | Indel-59 | Z1913    | -    | putative tail component of prophage CP-933X           |
| Indel-59               | Indel-59 | Z1914    | -    | putative minor tail fiber protein of prophage CP-933X |
| Indel-59               | Indel-59 | Z1915    | -    | putative tail protein (partial) of prophage CP-933X   |
| Indel-59               | Indel-59 | Z1916    | -    | putative tail protein (partial) of prophage CP-933X   |
| Indel-60               |          | Z1919    | -    | unknown protein encoded by prophage CP-933X           |
| Indel-60               | ECs1650  | Z1918    | -    | putative tail fiber protein                           |
| Indel-60               | ECs1651  | Z1920    | -    | tail fiber assembly protein                           |
| Indel-60               | ECs1652  | Z1921    | -    | putative catalase                                     |
| Indel-60               | ECs1653  | Z1922    | -    | hypothetical protein                                  |
| Indel-60               | ECs1654  | Z1923    | -    | hypothetical protein                                  |
| Indel-60               | ECs1655  | Z1924    | -    | hypothetical protein                                  |
| Indel-60               | ECs1656  | Z1925    | -    | hypothetical protein                                  |
| Indel-60               | ECs1657  | Z1926    | -    | hypothetical protein                                  |
| Indel-60               | ECs1658  | Z1927    | -    | hypothetical protein                                  |
| Indel-60               | ECs1659  | Z1928    | -    | hypothetical protein                                  |
| Indel-60               | ECs1660  | Z1929    | -    | hypothetical protein                                  |
| Indel-60               | ECs1661  |          | -    | BfpA-like protein                                     |
| Indel-60               | ECs1662  | Z1930    | -    | hypothetical protein                                  |

Table S10. The orthologue table of the O55 and O157 strains Page 53

| Locus_tag <sup>a</sup> |          |          | Gene | Product                                                               |
|------------------------|----------|----------|------|-----------------------------------------------------------------------|
| CB9615                 | Sakai    | EDL933   |      |                                                                       |
| Indel-60               | ECs1663  | Z1931    | -    | outer membrane protease precursor                                     |
| Indel-60               | ECs1664  | Z1932    | -    | hypothetical protein                                                  |
| Indel-62               | ECs1665  | Z1933    | -    | putative transposase OrfA protein of insertion sequence IS629         |
| Indel-62               | ECs1666  | Z1934    | -    | putative transposase OrfB protein of insertion sequence IS629         |
| G2583_1413             | Indel-63 | Indel-63 | elbA | Anti-adapter protein iraM                                             |
| G2583_1414             | Indel-63 | Indel-63 | ycgX | hypothetical protein                                                  |
| G2583_1415             | Indel-63 | Indel-63 | ycgE | transcriptional regulator mlrA                                        |
| G2583_1416             | Indel-63 | Indel-63 | ycgF | BLUF domain/cyclic diguanylate phosphodiesterase (EAL) domain protein |
| G2583_1417             | Indel-63 | Indel-63 | ycgF | BLUF domain/cyclic diguanylate phosphodiesterase (EAL) domain protein |
| G2583_1418             | Indel-63 | Indel-63 | ycgZ | hypothetical protein                                                  |
| G2583_1419             | Indel-63 | Indel-63 | -    | hypothetical protein                                                  |
| G2583_1420             | Indel-63 | Indel-63 | ymgA | hypothetical protein                                                  |
| G2583_1421             | Indel-63 | Indel-63 | ymgB | hypothetical protein                                                  |
| G2583_1422             | Indel-63 | Indel-63 | ymgC | hypothetical protein                                                  |
| G2583_1423             | Indel-63 | Indel-63 | ycgG | Cyclic diguanylate phosphodiesterase (EAL) domain protein             |
| G2583_1424             | Indel-63 | Indel-63 | ymgF | hypothetical protein                                                  |
| G2583_1425             | Indel-63 | Indel-63 | -    | hypothetical protein                                                  |
| G2583_1426             | Indel-63 | Indel-63 | -    | Porin, autotransporter (AT) family                                    |
| G2583_1427             | Indel-63 | Indel-63 | -    | Porin, autotransporter (AT) family                                    |
| G2583_1428             | Indel-63 | Indel-63 | ymgD | hypothetical protein                                                  |
| G2583_1429             | Indel-63 | Indel-63 | -    | hypothetical protein                                                  |
| G2583_1430             | Indel-63 | Indel-63 | ymgI | hypothetical protein                                                  |
| G2583_1431             | Indel-63 | Indel-63 | ymgJ | hypothetical protein                                                  |
| G2583_1432             | Indel-63 | Indel-63 | ypjA | Putative ATP-binding component of a transport system                  |
|                        | ECs1667  | Z1935    | -    | hypothetical protein                                                  |
| G2583_1433             | ECs1668  | Z1936    | minE | Cell division topological specificity factor                          |
| G2583_1434             | ECs1669  | Z1937    | minD | Septum site-determining protein minD                                  |
| G2583_1435             | ECs1670  | Z1938    | minC | Septum site-determining protein minC                                  |
| G2583_1436             | ECs1671  | Z1939    | ycgJ | Putative fels-1 Prophage Protein                                      |
| G2583_1437             | ECs1672  | Z1940    | ycgK | Bacterial pre-peptidase C-terminal domain protein                     |
| G2583_1438             | ECs1673  |          | -    | hypothetical protein                                                  |
| G2583_1439             | ECs1674  | Z1941    | ycgL | hypothetical protein                                                  |
| G2583_1440             | ECs1675  | Z1942    | ycgM | Fumarylacetoacetate hydrolase family protein                          |
| G2583_1441             | ECs1676  | Z1943    | ycgN | conserved hypothetical protein                                        |
| G2583_1442             | ECs1677  | Z1944    | hlyE | Hemolysin E                                                           |
| G2583_1443             |          |          | -    | ncRNA                                                                 |
| G2583_1444             | ECs1678  | Z1946    | umuD | DNA polymerase V subunit UmuD                                         |
| G2583_1445             | ECs1679  | Z1947    | umuC | DNA polymerase V subunit UmuC                                         |
| G2583_1446             | ECs1680  | Z1948    | dsbB | Disulfide bond formation protein B                                    |

Table S10. The orthologue table of the O55 and O157 strains Page 54

| Locus_tag <sup>a</sup> |          |          | Gene | Product                                                             |
|------------------------|----------|----------|------|---------------------------------------------------------------------|
| CB9615                 | Sakai    | EDL933   |      |                                                                     |
| G2583_1447             | ECs1681  | Z1949    | nhaB | Na(+)/H(+) antiporter nhaB                                          |
| G2583_1448             | ECs1682  | Z1950    | fadR | Fatty acid metabolism regulator protein                             |
| G2583_1449             | ECs1683  | Z1951    | ycgB | SpoVR family protein                                                |
| G2583_1450             | ECs1684  | Z1952    | dadA | D-amino acid dehydrogenase small subunit                            |
| G2583_1451             | ECs1685  | Z1953    | dadX | Alanine racemase, catabolic                                         |
| G2583_1452             | Indel-65 | Indel-65 | ipaH | hypothetical protein                                                |
| G2583_1453             | Indel-65 | Indel-65 | -    | hypothetical protein                                                |
| G2583_1454             | ECs1686  | Z1954    | cvrA | potassium/proton antiporter                                         |
| G2583_1455             | ECs1688  | Z1955    | ldcA | Muramoyltetrapeptide carboxypeptidase                               |
| G2583_1456             | ECs1687  | Z1956    | emtA | Membrane-bound lytic murein transglycosylase E                      |
| Indel-66               | ECs1689  | Z1957    | -    | putative transposase OrfB protein of insertion sequence IS629       |
| Indel-66               | ECs1690  | Z1958    | -    | putative transposase OrfA protein of insertion sequence IS629       |
| G2583_1457             | ECs1691  | Z1959    | ycgR | hypothetical protein                                                |
| G2583_1458             | ECs1692  | Z1960    | yngE | hypothetical protein                                                |
| G2583_1459             | ECs1693  | Z1961    | prpA | Putative TonB dependent outer membrane receptor                     |
| G2583_1460             | ECs1694  | Z1962    | modD | Putative pyrophosphorylase modD                                     |
|                        | ECs1695  |          | -    | hypothetical protein                                                |
| G2583_1461             | ECs1696  | Z1963    | -    | Putative methyltransferase                                          |
| G2583_1462             | ECs1697  | Z1964    | -    | Putative iron compound ABC transporter, ATP-binding protein         |
| G2583_1463             | ECs1698  | Z1965    | -    | Putative iron compound ABC transporter, permease protein            |
| G2583_1464             | ECs1699  | Z1966    | -    | Putative iron compound ABC transporter, periplasmic-binding protein |
| G2583_1465             | ECs1700  | Z1967    | -    | hypothetical protein                                                |
| G2583_1466             | ECs1701  | Z1968    | treA | putative trehalase                                                  |
| G2583_1467             | ECs1702  |          | treA | trehalase                                                           |
| G2583_1468             | ECs1703  | Z1969    | dhaM | Putative PTS system enzyme I                                        |
| G2583_1469             | ECs1704  | Z1970    | dhaL | Putative dihydroxyacetone kinase                                    |
| G2583_1470             | ECs1705  | Z1971    | dhaK | Dihydroxyacetone kinase, N-terminal domain                          |
|                        | ECs1706  |          | -    | hypothetical protein                                                |
| G2583_1471             | Indel-67 | Indel-67 | dhaR | PTS-dependent dihydroxyacetone kinase operon regulatory protein     |
| G2583_1472             | ECs1707  | Z1972    | ycgV | putative outer membrane autotransporter                             |
| G2583_1473             |          |          | -    | hypothetical protein                                                |
| G2583_1474             | ECs1708  | Z1974    | ychF | GTP-dependent nucleic acid-binding protein engD                     |
| G2583_1475             | ECs1709  | Z1975    | pth  | Peptidyl-tRNA hydrolase                                             |
| G2583_1476             | ECs1710  | Z1976    | ychH | predicted inner membrane protein                                    |
| G2583_1477             | ECs1711  | Z1977    | ychM | Putative sulfate transporter ychM                                   |
| G2583_1478             | ECs1712  | Z1978    | prs  | Ribose-phosphate pyrophosphokinase                                  |
| G2583_1479             | ECs1713  | Z1979    | ispE | 4-diphosphocytidyl-2-C-methyl-D-erythritol kinase                   |
| G2583_1480             | ECs1714  | Z1980    | lolB | Outer membrane lipoprotein LolB                                     |

Table S10. The orthologue table of the O55 and O157 strains Page 55

| Locus_tag <sup>a</sup> |          |        | Gene | Product                                                           |
|------------------------|----------|--------|------|-------------------------------------------------------------------|
| CB9615                 | Sakai    | EDL933 |      |                                                                   |
| G2583_1481             | ECs1715  | Z1981  | hemA | Glutamyl-tRNA reductase                                           |
| G2583_1482             | ECs1716  | Z1982  | prfA | Peptide chain release factor 1                                    |
| G2583_1483             | ECs1717  | Z1983  | prmC | Protein-(Glutamine-N5) methyltransferase, release factor-specific |
| G2583_1484             | ECs1718  | Z1984  | ychQ | Putative Invasion gene expression up-regulator SirB               |
| G2583_1485             | ECs1719  | Z1985  | ychA | putative transcriptional regulator                                |
| G2583_1486             | ECs1720  | Z1986  | kdsA | 2-dehydro-3-deoxyphosphooctonate aldolase                         |
| G2583_1487             |          | Z1987  | ldrB | hypothetical protein                                              |
| Indel-68               | Indel-68 | Z1989  | -    | hypothetical protein                                              |
| G2583_1488             | ECs1721  | Z1991  | chaA | Calcium/proton antiporter                                         |
| G2583_1489             | ECs1722  | Z1992  | chaB | Cation transport regulator chaB                                   |
| G2583_1490             | ECs1723  | Z1993  | chaC | Cation transport regulator                                        |
| G2583_1491             | ECs1724  | Z1994  | ychN | hypothetical protein                                              |
| G2583_1492             | ECs1725  | Z1995  | ychO | Putative invasin                                                  |
| G2583_1493             | ECs1726  | Z1996  | narL | Nitrate/nitrite response regulator protein narL                   |
| G2583_1494             | ECs1727  | Z1998  | narX | Nitrate/nitrite sensor protein NarX                               |
| G2583_1495             |          |        | -    | hypothetical protein                                              |
| G2583_1496             | ECs1728  | Z2000  | narK | Nitrite extrusion protein 1                                       |
| G2583_1497             | ECs1729  | Z2001  | narG | Nitrate reductase, alpha subunit                                  |
| G2583_1498             | ECs1730  | Z2002  | narH | Nitrate reductase, beta subunit                                   |
| G2583_1499             | ECs1731  | Z2003  | narJ | Respiratory nitrate reductase 1 delta chain                       |
| G2583_1500             | ECs1732  | Z2004  | narI | Respiratory nitrate reductase, gamma subunit                      |
| G2583_1501             | ECs1733  | Z2005  | ychS | hypothetical protein                                              |
| G2583_1502             |          |        | -    | ncRNA                                                             |
| G2583_1503             | tyrV     | RNA034 | tyrV | Tyr tRNA                                                          |
| G2583_1504             |          |        | -    | ncRNA                                                             |
| G2583_1505             | tyrT     | RNA035 | tyrT | Tyr tRNA                                                          |
| G2583_1506             | ECs1734  | Z2008  | purU | Formyltetrahydrofolate deformylase                                |
| G2583_1507             | ECs1735  | Z2009  | ychJ | SEC-C motif domain protein                                        |
| G2583_1508             | ECs1736  | Z2010  | rssA | Phospholipase, patatin family                                     |
| G2583_1509             | ECs1737  | Z2011  | rssB | response regulator of RpoS                                        |
| G2583_1510             | ECs1738  | Z2012  | galU | UTP--glucose-1-phosphate uridylyltransferase                      |
| G2583_1511             | ECs1739  | Z2013  | hns  | DNA-binding protein H-NS                                          |
| G2583_1512             | ECs1740  | Z2015  | tdk  | Thymidine kinase                                                  |
| G2583_1513             | ECs1741  | Z2016  | adhE | Aldehyde-alcohol dehydrogenase                                    |
| G2583_1514             | ECs1742  | Z2017  | ychE | Integral membrane protein, MarC family                            |
| G2583_1515             | ECs1743  | Z2019  | oppA | Periplasmic oligopeptide-binding protein                          |
| G2583_1516             | ECs1744  | Z2020  | oppB | Oligopeptide transport system permease protein oppB               |
| G2583_1517             | ECs1745  | Z2021  | oppC | Oligopeptide transport system permease protein oppC               |
| G2583_1518             | ECs1746  | Z2022  | oppD | Oligopeptide ABC transporter, ATP-binding protein                 |
| G2583_1519             | ECs1747  | Z2023  | oppF | Oligopeptide ABC transporter, ATP-binding protein                 |
| G2583_1520             | ECs1748  | Z2024  | yciU | hypothetical protein                                              |
| G2583_1521             | ECs1749  | Z2026  | cls  | Cardiolipin synthetase                                            |
| G2583_1522             |          |        | yciY | hypothetical protein                                              |

Table S10. The orthologue table of the O55 and O157 strains Page 56

| Locus_tag <sup>a</sup> |         |          | Gene  | Product                                                           |
|------------------------|---------|----------|-------|-------------------------------------------------------------------|
| CB9615                 | Sakai   | EDL933   |       |                                                                   |
| G2583_1523             | ECs1750 | Z2028    | kch   | Potassium channel protein kch                                     |
| G2583_1524             | ECs1751 | Z2029    | ycil  | Uncharacterized protein conserved in bacteria                     |
| G2583_1525             | ECs1752 | Z2030    | tonB  | outer membrane receptor-mediated transport energizer protein TonB |
| G2583_1526             | ECs1753 | Z2031    | yciA  | Acyl-CoA thioester hydrolase yciA                                 |
| G2583_1527             | ECs1754 | Z2032    | yciB  | Probable intracellular septation protein                          |
| G2583_1528             | ECs1755 | Z2033    | yciC  | UPF0259 membrane protein yciC                                     |
| G2583_1529             | ECs1756 | Z2034    | ompW  | Outer membrane protein W                                          |
| G2583_1530             | ECs1757 | Z2036    | intE  | Putative integrase for prophage CP-933O                           |
| G2583_1531             | ECs1758 |          | xisE  | Excisionase                                                       |
| G2583_1532             | ECs1759 | Z2037    | exoO  | putative exonuclease                                              |
| G2583_1533             | ECs1760 | Z2038    | ydfD  | unknown protein encoded by prophage CP-933O                       |
| G2583_1534             | ECs1761 | Z2039    | dicB  | Putative regulator of cell division encoded by prophage CP-933O   |
| G2583_1535             | dicF4   |          | dicF4 | ncRNA                                                             |
| G2583_1536             | ECs1762 | Z2040    | -     | unknown protein encoded by prophage CP-933O                       |
| G2583_1537             | ECs1763 | Z2041    | -     | unknown protein encoded by prophage CP-933O                       |
| G2583_1538             | ECs1764 | Z2042    | ydfC  | unknown protein encoded by prophage CP-933O                       |
| G2583_1539             |         | Z2043    | -     | hypothetical protein                                              |
| G2583_1540             | ECs1765 | Z2045    | dicA  | Similar to DicA, regulator of DicB encoded by prophage CP-933O    |
| G2583_1541             | ECs1766 | Z2046    | dicC  | DNA-binding transcriptional regulator DicC                        |
| G2583_1542             | ECs1767 | Z2047    | -     | unknown protein encoded by prophage CP-933O                       |
| G2583_1543             | ECs1768 | Z2048    | -     | unknown protein encoded by prophage CP-933O                       |
| G2583_1544             | ECs1769 | Z2049    | -     | unknown protein encoded by prophage CP-933O                       |
| G2583_1545             | ECsp014 | Z2051    | -     | hypothetical protein EcolO15_16731                                |
| G2583_1546             | ECs1770 |          | papH  | putative fimbrial minor pilin protein precursor                   |
|                        | ECs1771 |          | -     | fimbrial minor pilin protein precursor                            |
|                        |         | Z2052    | -     | unknown protein encoded by prophage CP-933O                       |
| G2583_1547             | ECs1772 | Z2053    | acfC  | Porcine attaching-effacing associated protein                     |
| G2583_1548             | ECs1773 | Z2054    | gef   | Putative killer protein encoded by prophage CP-933O               |
| G2583_1549             | ECs1774 | Z2055    | rem   | hypothetical protein                                              |
| G2583_1550             | ECs1775 |          | -     | hypothetical protein                                              |
| G2583_1551             | ECs1776 | Z2056    | -     | hypothetical protein                                              |
| Indel-72               | ECs1777 | Z2057    | -     | endonuclease                                                      |
| Indel-72               | ECs1778 | Z2058    | -     | hypothetical protein                                              |
| Indel-72               | ECs1779 | Z2059    | -     | hypothetical lipoprotein                                          |
| Indel-72               | ECs1780 | Z2060    | -     | putative DNA methylase                                            |
| Indel-72               | ileZ3   | RNA036   | ileZ3 | Ile tRNA                                                          |
| Indel-72               | argO3   | RNA037   | argO3 | Arg tRNA                                                          |
| Indel-72               |         | Z2063    | -     | unknown protein encoded by prophage CP-933O                       |
| Indel-73               | ECs1781 | Indel-73 | -     | hypothetical protein                                              |
| Indel-73               | ECs1782 | Indel-73 | -     | putative holin protein                                            |
| Indel-73               | ECs1783 | Indel-73 | -     | hypothetical protein                                              |



Table S10. The orthologue table of the O55 and O157 strains Page 57

| Locus_tag <sup>a</sup> |          |          | Gene | Product                                                                              |
|------------------------|----------|----------|------|--------------------------------------------------------------------------------------|
| CB9615                 | Sakai    | EDL933   |      |                                                                                      |
| Indel-73               | ECs1784  | Indel-73 | -    | putative endolysin                                                                   |
| Indel-73               | ECs1785  | Indel-73 | -    | antirepressor protein                                                                |
| Indel-73               | ECs1786  | Indel-73 | -    | endopeptidase                                                                        |
| Indel-73               | ECs1787  | Indel-73 | -    | lipoprotein Rz1 precursor                                                            |
| Indel-73               | ECs1788  | Indel-73 | -    | hypothetical protein                                                                 |
| Indel-73               | ECs1789  | Indel-73 | -    | putative Dnase                                                                       |
| Indel-73               | ECs1790  | Indel-73 | -    | hypothetical protein                                                                 |
| Indel-73               | ECs1791  | Indel-73 | -    | putative terminase small subunit                                                     |
| Indel-73               | ECs1792  | Indel-73 | -    | putative terminase large subunit                                                     |
| Indel-73               | ECs1793  | Indel-73 | -    | major head protein/prohead protease                                                  |
| Indel-73               | ECs1794  | Indel-73 | -    | hypothetical protein                                                                 |
| Indel-73               | ECs1795  | Indel-73 | -    | putative portal protein                                                              |
| Indel-73               | ECs1796  | Indel-73 | -    | hypothetical protein                                                                 |
| Indel-73               | ECs1797  | Indel-73 | -    | putative head-tail adaptor                                                           |
| Indel-73               | ECs1798  | Indel-73 | -    | hypothetical protein                                                                 |
| Indel-73               | ECs1799  | Indel-73 | -    | hypothetical protein                                                                 |
| Indel-73               | ECs1800  | Indel-73 | -    | putative major tail subunit                                                          |
| Indel-73               | ECs1801  | Indel-73 | -    | putative tail assembly chaperone                                                     |
| Indel-73               | ECs1802  | Indel-73 | -    | putative tail assembly chaperone                                                     |
| Indel-73               | ECs1803  | Indel-73 | -    | putative tail length tape measure protein                                            |
| Indel-73               | ECs1804  | Indel-73 | -    | minor tail protein                                                                   |
| Indel-73               | ECs1805  | Indel-73 | -    | minor tail protein                                                                   |
| Indel-74               | Indel-74 | Z2065    | -    | similar to conserved hypothetical phage protein YjhS encoded within prophage CP-933O |
| Indel-74               | Indel-74 | Z2066    | -    | unknown protein encoded by prophage CP-933O                                          |
| Indel-74               | Indel-74 | Z2068    | -    | unknown protein encoded by prophage CP-933O                                          |
| Indel-74               | Indel-74 | Z2069    | -    | putative holin protein of prophage CP-933O                                           |
| Indel-74               | Indel-74 | Z2070    | -    | unknown protein encoded by prophage CP-933O                                          |
| Indel-74               | Indel-74 | Z2071    | -    | putative endolysin of prophage CP933-O; partial                                      |
| Indel-74               | Indel-74 | Z2072    | -    | putative IS encoded protein encoded by prophage CP-933O                              |
| Indel-74               | Indel-74 | Z2073    | -    | putative transposase within CP-933O                                                  |
| Indel-74               | Indel-74 | Z2074    | -    | putative IS encoded protein within CP-933O                                           |
| G2583_1552             | Indel-75 | Indel-75 | -    | Holliday junction resolvase                                                          |
| G2583_1553             | Indel-75 | Indel-75 | -    | Antitermination protein Q                                                            |
| G2583_5267             | Indel-75 | Indel-75 | -    | Met tRNA                                                                             |
| G2583_5268             | Indel-75 | Indel-75 | -    | Arg tRNA                                                                             |
| G2583_1554             | Indel-75 | Indel-75 | -    | hypothetical protein                                                                 |
| G2583_1555             | Indel-75 | Indel-75 | -    | hypothetical protein                                                                 |
| G2583_1556             | Indel-75 | Indel-75 | -    | hypothetical protein                                                                 |
| G2583_1557             | Indel-75 | Indel-75 | -    | hypothetical protein                                                                 |
| G2583_1558             | Indel-75 | Indel-75 | -    | Putative lysis protein S of prophage CP-933V                                         |
| G2583_1559             | Indel-75 | Indel-75 | ybcS | lysozyme-like protein                                                                |
| G2583_1560             | Indel-75 | Indel-75 | ybcT | Bacteriophage lysis protein                                                          |

Table S10. The orthologue table of the O55 and O157 strains Page 58

| Locus_tag <sup>a</sup> |          |          | Gene | Product                                                  |
|------------------------|----------|----------|------|----------------------------------------------------------|
| CB9615                 | Sakai    | EDL933   |      |                                                          |
| G2583_1561             | Indel-75 | Indel-75 | -    | hypothetical protein                                     |
| G2583_1562             | Indel-75 | Indel-75 | -    | Putative transcriptional regulator                       |
| G2583_1563             | Indel-75 | Indel-75 | ynfO | unknown protein encoded within prophage CP-933R          |
| G2583_1564             | Indel-75 | Indel-75 | -    | unknown protein encoded by prophage CP-933N              |
| G2583_1565             | Indel-75 | Indel-75 | -    | Phage terminase, small subunit                           |
| G2583_1566             | Indel-75 | Indel-75 | -    | Phage terminase-like protein, large subunit              |
| G2583_1567             | Indel-75 | Indel-75 | -    | Phage head maturation protease                           |
| G2583_1568             | Indel-75 | Indel-75 | insN | unknown protein encoded by IS911 within prophage CP-933L |
| G2583_1569             | Indel-75 | Indel-75 | -    | putative transposase                                     |
| G2583_1570             | Indel-75 | Indel-75 | -    | Phage head maturation protease                           |
| G2583_1571             | Indel-75 | Indel-75 | -    | conserved hypothetical protein                           |
| G2583_1572             | Indel-75 | Indel-75 | -    | conserved hypothetical protein                           |
| G2583_1573             | Indel-75 | Indel-75 | -    | Bacteriophage head-tail adaptor                          |
| G2583_1574             | Indel-75 | Indel-75 | -    | Phage protein, HK97 gp10 family                          |
| G2583_1575             | Indel-75 | Indel-75 | -    | unknown protein encoded by prophage CP-933N              |
| G2583_1576             | Indel-75 | Indel-75 | -    | Putative major tail subunit                              |
| G2583_1577             | Indel-75 | Indel-75 | -    | Phage tail assembly chaperone                            |
| G2583_1578             | Indel-75 | Indel-75 | -    | putative tail protein                                    |
| G2583_1579             | Indel-75 | Indel-75 | -    | putative tail length tape measure protein                |
| G2583_1580             | Indel-75 | Indel-75 | -    | minor tail protein                                       |
| G2583_1581             | Indel-75 | Indel-75 | -    | Phage-related protein                                    |
| G2583_1582             | Indel-75 | Indel-75 | -    | Putative tail fiber component                            |
| G2583_1583             | Indel-75 | Indel-75 | -    | putative tail assembly protein                           |
| G2583_1584             | Indel-75 | Indel-75 | -    | putative host specificity protein                        |
| G2583_1585             | Indel-75 | Indel-75 | insF | IS911 transposase orfB                                   |
| G2583_1586             | Indel-75 | Indel-75 | insN | unknown protein encoded by IS911 within prophage CP-933L |
| G2583_1587             | Indel-75 | Indel-75 | -    | Opacity protein and related surface antigens             |
| G2583_1588             | Indel-75 | Indel-75 | -    | hypothetical protein                                     |
| G2583_1589             | Indel-75 | Indel-75 | -    | conserved hypothetical protein                           |
| G2583_1590             | Indel-75 | Indel-75 | -    | NleA8-2 protein                                          |
| G2583_1591             | Indel-75 | Indel-75 | -    | putative integrase fragment                              |
| G2583_1592             | Indel-75 | Indel-75 | nleH | Non-LEE-encoded type III effector H                      |
| G2583_1593             | Indel-75 | Indel-75 | nleF | hypothetical protein                                     |
| G2583_1594             | Indel-75 | Indel-75 | -    | Putative transposase within CP-933O; partial             |
| Indel-76               | ECs1806  | Z6029    | -    | putative host specificity protein                        |
| Indel-76               | ECs1807  | Z6028    | lomP | putative outer membrane protein precursor                |
| Indel-76               | ECs1808  | Z6027    | -    | putative tail fiber protein                              |
| Indel-76               | ECs1809  | Z6026    | -    | hypothetical protein                                     |
| Indel-76               | ECs1810  |          | -    | hypothetical protein                                     |
| Indel-76               | ECs1811  | Z6025    | -    | hypothetical protein                                     |
| Indel-76               | ECs1812  | Z6024    | -    | hypothetical protein                                     |
| Indel-76               |          | Z6023    | -    | unknown protein encoded by cryptic prophage CP-933P      |

Table S10. The orthologue table of the O55 and O157 strains Page 59

| Locus_tag <sup>a</sup> |         |        | Gene | Product                                                                                |
|------------------------|---------|--------|------|----------------------------------------------------------------------------------------|
| CB9615                 | Sakai   | EDL933 |      |                                                                                        |
| Indel-76               | ECs1813 | Z6022  | -    | integrase                                                                              |
| Indel-76               | ECs1814 | Z6021  | -    | hypothetical protein                                                                   |
| Indel-76               | ECs1815 | Z6020  | -    | hypothetical protein                                                                   |
| Indel-76               | ECs1816 | Z6019  | -    | hypothetical protein                                                                   |
| Indel-76               | ECs1817 | Z6017  | -    | hypothetical protein                                                                   |
| Indel-76               | ECs1818 | Z6016  | -    | hypothetical protein                                                                   |
| Indel-76               | ECs1819 | Z6015  | -    | hypothetical protein                                                                   |
| Indel-76               | ECs1820 | Z6014  | -    | hypothetical protein                                                                   |
| Indel-76               |         | Z6012  | -    | hypothetical protein                                                                   |
| Indel-76               | ECs1821 |        | -    | hypothetical protein                                                                   |
| Indel-76               | ECs1822 |        | -    | hypothetical protein                                                                   |
| Indel-76               | ECs1823 | Z6011  | -    | hypothetical protein                                                                   |
| Indel-76               | ECs1824 | Z6010  | -    | hypothetical protein                                                                   |
| Indel-76               | ECs1825 | Z2565  | -    | bfpT-regulated chaperone-like protein                                                  |
| Indel-76               | ECs1826 | Z2563  | -    | hypothetical protein                                                                   |
| Indel-76               | ECsp015 | Z2562  | -    | putative transposase (partial)                                                         |
| Indel-76               | ECs1827 | Z2561  | -    | IS630 hypothetical protein                                                             |
| Indel-76               | ECs1828 | Z2560  | -    | hypothetical protein                                                                   |
| Indel-76               | ECsp016 |        | -    | insertion sequence IS3                                                                 |
| Indel-76               |         | Z2558  | -    | hypothetical protein                                                                   |
| G2583_1595             |         | Z2557  | yciD | Putative outer membrane protein                                                        |
| G2583_1596             | ECs1829 | Z2555  | yciE | YciE protein                                                                           |
| G2583_1597             | ECs1830 | Z2554  | yciF | YciF protein                                                                           |
| G2583_1598             | ECs1831 | Z2553  | yciG | hypothetical protein                                                                   |
| G2583_1599             | ECs1832 | Z2551  | trpA | Tryptophan synthase alpha chain                                                        |
| G2583_1600             | ECs1833 | Z2550  | trpB | Tryptophan synthase beta chain                                                         |
| G2583_1601             | ECs1834 | Z2549  | trpC | bifunctional indole-3-glycerol phosphate synthase/phosphoribosylanthranilate isomerase |
| G2583_1602             | ECs1835 | Z2548  | trpD | Anthranilate synthase, component II                                                    |
| G2583_1603             | ECs1836 | Z2547  | trpE | anthranilate synthase component I                                                      |
| G2583_1603             | ECs1836 | Z2546  | trpE | anthranilate synthase component I                                                      |
| G2583_1604             | ECs1837 | Z2545  | trpL | trp operon leader peptide                                                              |
| G2583_1605             | ECs1838 | Z2544  | trpH | Putative phosphoesterase                                                               |
| G2583_1606             | ECs1839 | Z2543  | yciO | hypothetical protein                                                                   |
| G2583_1607             | ECs1840 | Z2542  | -    | conserved hypothetical protein                                                         |
| G2583_1608             | ECs1841 | Z2541  | rIuB | Ribosomal large subunit pseudouridine synthase B                                       |
| G2583_1609             | ECs1842 | Z2540  | btuR | Cob(I)yrinic acid a,c-diamide adenosyltransferase                                      |
| G2583_1610             | ECs1843 | Z2539  | yciK | Oxidoreductase, short chain dehydrogenase/reductase family                             |
| G2583_1611             | ECs1844 | Z2538  | sohB | Peptidase, S49 (Protease IV) family                                                    |
| G2583_1612             | ECs1845 | Z2537  | yciN | hypothetical protein                                                                   |
| G2583_1613             | ECs1846 | Z2536  | topA | DNA topoisomerase I                                                                    |
| G2583_1614             | ECs1847 | Z2535  | cysB | transcriptional regulator CysB                                                         |
| G2583_1615             |         | Z2534  | ymiA | hypothetical protein                                                                   |

Table S10. The orthologue table of the O55 and O157 strains Page 60

| Locus_tag <sup>a</sup> |         |        | Gene | Product                                                                         |
|------------------------|---------|--------|------|---------------------------------------------------------------------------------|
| CB9615                 | Sakai   | EDL933 |      |                                                                                 |
| G2583_1616             | ECs1848 | Z2533  | yciX | hypothetical protein                                                            |
| G2583_1617             | ECs1849 | Z2532  | acnA | Aconitate hydratase 1                                                           |
| G2583_1618             | ECs1850 | Z2531  | ribA | GTP cyclohydrolase-2                                                            |
| G2583_1619             | ECs1851 | Z2529  | pgpB | Phosphatidylglycerophosphatase B                                                |
| G2583_1620             | ECs1852 | Z2528  | yciS | hypothetical protein                                                            |
| G2583_1621             | ECs1853 | Z2526  | yciM | hypothetical protein                                                            |
| G2583_1622             | ECs1854 | Z2525  | pyrF | Orotidine 5'-phosphate decarboxylase                                            |
| G2583_1623             | ECs1855 | Z2524  | yciH | Putative translation initiation factor SUI1                                     |
| G2583_1624             | ECs1856 | Z2523  | osmB | hypothetical protein                                                            |
| G2583_1625             | ECs1857 | Z2521  | yciT | putative DEOR-type transcriptional regulator                                    |
| G2583_1626             |         | Z2519  | yciZ | UPF0509 protein yciZ                                                            |
| G2583_1627             | ECs1858 | Z2516  | gmr  | sensory box-containing diguanylate cyclase/cyclic diguanylate phosphodiesterase |
| G2583_1628             | ECs1859 | Z2514  | rnb  | Exoribonuclease 2                                                               |
| G2583_1629             | ECs1860 | Z2513  | yciW | Putative oxidoreductase                                                         |
| G2583_1630             | ECs1861 | Z2512  | fabI | Enoyl-[acyl-carrier-protein] reductase [NADH]                                   |
| G2583_1631             |         | Z2511  | -    | hypothetical protein                                                            |
| G2583_1632             | ECs1862 | Z2510  | eefR | Putative transcriptional repressor                                              |
| G2583_1633             | ECs1863 | Z2509  | eefA | Acriflavine resistance protein A                                                |
| G2583_1634             | ECs1864 | Z2508  | acrB | putative multidrug-efflux transport protein                                     |
|                        |         | Z2507  | -    | hypothetical protein                                                            |
| G2583_1635             | ECs1865 | Z2506  | eefC | Multidrug efflux outer membrane protein EefC                                    |
| G2583_1635             | ECs1865 | Z2504  | eefC | Multidrug efflux outer membrane protein EefC                                    |
| G2583_1636             | ECs1866 | Z2503  | eefD | Multidrug efflux transport protein EefD                                         |
| G2583_1636             | ECs1866 | Z2501  | eefD | Multidrug efflux transport protein EefD                                         |
| G2583_1637             | ECs1867 | Z2500  | sapF | Peptide transport system, ATP-binding protein SapF                              |
| G2583_1638             | ECs1868 | Z2499  | sapD | Peptide transport system ATP-binding protein sapD                               |
| G2583_1639             | ECs1869 | Z2498  | sapC | Peptide ABC transporter, permease protein SapC                                  |
| G2583_1640             | ECs1870 | Z2496  | sapB | Peptide transport system permease protein sapB                                  |
| G2583_1641             | ECs1871 | Z2494  | sapA | Homolog of Salmonella peptide transport periplasmic protein                     |
| G2583_1642             | ECs1872 | Z2493  | ymjA | hypothetical protein                                                            |
| G2583_1643             | ECs1873 | Z2492  | puuP | Putative amino acid/amine transport protein                                     |
| G2583_1644             | ECs1874 | Z2491  | puuA | Putative glutamine synthetase                                                   |
| G2583_1645             | ECs1875 | Z2490  | puuD | Gamma-glutamyl-gamma-aminobutyrate hydrolase                                    |
| G2583_1646             | ECs1876 | Z2489  | puuR | DNA-binding transcriptional repressor                                           |
| G2583_1647             | ECs1877 | Z2488  | puuC | Gamma-glutamyl-gamma-aminobutyraldehyde dehydrogenase                           |
| G2583_1648             | ECs1878 | Z2487  | puuB | Gamma-glutamylputrescine oxidoreductase                                         |
| G2583_1649             | ECs1879 | Z2486  | puuE | 4-aminobutyrate transaminase                                                    |
| G2583_1650             | ECs1880 | Z2484  | pspF | Psp operon transcriptional activator                                            |
| G2583_1651             | ECs1881 | Z2482  | pspA | Phage shock protein                                                             |
| G2583_1652             | ECs1882 | Z2480  | pspB | Phage shock protein B                                                           |
| G2583_1653             | ECs1883 | Z2479  | pspC | Phage shock protein C                                                           |

Table S10. The orthologue table of the O55 and O157 strains Page 61

| Locus_tag <sup>a</sup> |         |        | Gene | Product                                                             |
|------------------------|---------|--------|------|---------------------------------------------------------------------|
| CB9615                 | Sakai   | EDL933 |      |                                                                     |
| G2583_1654             | ECs1884 | Z2478  | pspD | Phage shock protein                                                 |
| G2583_1655             | ECs1885 | Z2477  | pspE | Phage shock protein E                                               |
| G2583_1656             | ECs1886 | Z2476  | ycjM | Alpha amylase family protein                                        |
| G2583_1656             | ECs1887 | Z2475  | ycjM | Alpha amylase family protein                                        |
| G2583_1657             | ECs1888 | Z2474  | ycjN | Sugar-binding periplasmic protein                                   |
| G2583_1657             | ECs1889 | Z2473  | ycjN | Sugar-binding periplasmic protein                                   |
| G2583_1658             | ECs1890 | Z2472  | ycjO | Putative sugar ABC transporter, permease protein                    |
| G2583_1659             | ECs1891 | Z2471  | ycjP | Binding-protein-dependent transport system inner membrane component |
| G2583_1660             | ECs1892 | Z2470  | ycjQ | Oxidoreductase, zinc-binding dehydrogenase family                   |
| G2583_1661             | ECs1893 | Z2469  | ycjR | AP endonuclease, family 2                                           |
| G2583_1662             | ECs1894 | Z2468  | ycjS | Gfo/idh/mocA family                                                 |
| G2583_1663             | ECs1895 | Z2467  | ycjT | glycosyl hydrolase, family 65                                       |
| G2583_1664             | ECs1896 | Z2465  | ycjU | Beta-phosphoglucomutase                                             |
| G2583_1665             | ECs1897 | Z2463  | ycjV | Uncharacterized ABC transporter ATP-binding protein ycjV            |
| G2583_1666             | ECs1898 | Z2462  | ompG | Outer membrane protein G                                            |
| G2583_1667             | ECs1899 | Z2461  | ycjW | putative LACI-type transcriptional regulator                        |
| G2583_1668             | ECs1900 | Z2458  | ycjX | putative EC 2.1 enzyme                                              |
| G2583_1669             | ECs1901 | Z2456  | ycjF | UPF0283 membrane protein ycjF                                       |
| G2583_1670             | ECs1902 | Z2454  | tyrR | DNA-binding transcriptional dual regulator, tyrosine-binding        |
| G2583_1671             | ECs1903 | Z2452  | tpx  | Thiol peroxidase                                                    |
| G2583_1672             | ECs1904 | Z2450  | ycjG | Mandelate racemase/muconate lactonizing enzyme family protein       |
| G2583_1673             | ECs1905 | Z2448  | mpaA | murein peptide amidase A                                            |
| G2583_1674             | ECs1906 | Z2446  | ymjC | NmrA family protein                                                 |
| G2583_1675             | ECs1907 | Z2445  | -    | hypothetical protein                                                |
| G2583_1675             | ECs1908 | Z2444  | -    | hypothetical protein                                                |
| G2583_1676             | ECs1909 | Z2442  | ycjY | hypothetical protein                                                |
| G2583_1677             | ECs1910 | Z2439  | ycjZ | putative transcriptional regulator LYSR-type                        |
| G2583_1678             | ECs1911 | Z2438  | mppA | Putative transport periplasmic protein                              |
| G2583_1679             | ECs1912 | Z2437  | ynaI | MscS family inner membrane protein ynaI                             |
| G2583_1680             | ECs1913 | Z2436  | ynaJ | hypothetical protein                                                |
| G2583_1681             | ECs1914 | Z2435  | uspE | Universal stress protein E                                          |
| G2583_1682             | ECs1915 | Z2433  | fnr  | Fumarate and nitrate reduction regulatory protein                   |
| G2583_1683             | ECs1916 | Z2432  | ogt  | Methylated-DNA-[protein]-cysteine S-methyltransferase               |
| G2583_1684             | ECs1917 | Z2431  | abgT | Aminobenzoyl-glutamate transport protein                            |
| Indel-78               | ECs1918 | Z2430  | -    | putative transposase OrfB protein of insertion sequence IS629       |
| Indel-78               | ECs1919 | Z2429  | -    | putative transposase OrfA protein of insertion sequence IS629       |
| G2583_1684             | ECs1920 | Z2428  | abgT | Aminobenzoyl-glutamate transport protein                            |
| G2583_1685             | ECs1921 | Z2427  | abgB | Aminobenzoyl-glutamate utilization protein B                        |

Table S10. The orthologue table of the O55 and O157 strains Page 62

| Locus_tag <sup>a</sup> |         |        | Gene   | Product                                                           |
|------------------------|---------|--------|--------|-------------------------------------------------------------------|
| CB9615                 | Sakai   | EDL933 |        |                                                                   |
| G2583_1686             | ECs1922 | Z2425  | abgA   | Aminobenzoyl-glutamate utilization protein A                      |
| G2583_1687             | ECs1923 | Z2423  | abgR   | putative DNA-binding transcriptional regulator                    |
| G2583_1688             |         |        | -      | ncRNA                                                             |
| G2583_1689             | ECs1924 | Z2422  | ydaL   | Smr domain protein                                                |
| G2583_1690             | ECs1925 | Z2421  | ydaM   | hypothetical protein                                              |
| G2583_1691             | ECs1926 | Z2419  | ydaN   | Zinc transport protein zntB                                       |
| G2583_1692             |         |        | -      | ncRNA                                                             |
| G2583_1693             | ECs1927 | Z2417  | dbpA   | ATP-independent RNA helicase DbpA                                 |
| G2583_1694             | ECs1928 | Z2416  | ttcA   | C32 tRNA thiolase                                                 |
| G2583_1695             | ECs1929 | Z2415  | intR   | Putative integrase for prophage CP-933R                           |
| G2583_1696             | ECs1930 | Z2414  | ydaQ   | hypothetical protein                                              |
| G2583_1697             | ECs1931 | Z2413  | ydaC   | hypothetical protein                                              |
| G2583_1698             | ECs1932 | Z2412  | lar    | Restriction alleviation and modification enhancement protein      |
| G2583_1699             | ECs1933 | Z2410  | recT   | Recombinase, DNA renaturation protein encoded by prophage CP-933R |
| G2583_1700             | ECs1934 | Z2409  | recE   | Putative exodeoxyribonuclease VIII of prophage CP-                |
| Indel-79               | ECs1935 | Z2408  | racC   | racC protein                                                      |
| Indel-79               | ECs1936 | Z2406  | ydaD   | hypothetical protein                                              |
| Indel-79               | ECs1937 | Z2404  | sieB   | phage superinfection exclusion protein                            |
| Indel-79               | ECs1939 |        | -      | hypothetical protein                                              |
| Indel-79               | ECs1938 | Z2403  | -      | hypothetical protein                                              |
| Indel-79               | ECs1940 | Z2402  | -      | hypothetical protein                                              |
| Indel-79               | ECs1941 | Z2400  | -      | putative transcriptional regulator                                |
| Indel-79               | ECs1942 | Z2399  | -      | regulatory protein                                                |
| Indel-79               | ECs1943 | Z2398  | -      | hypothetical protein                                              |
| Indel-79               | ECs1944 | Z2397  | -      | hypothetical protein                                              |
| Indel-79               | ECs1945 | Z2396  | -      | putative DNA replication factor                                   |
| Indel-79               | ECs1946 | Z2395  | -      | hypothetical protein                                              |
| Indel-79               | ECs1947 |        | -      | hypothetical protein                                              |
| Indel-79               | ECs1948 | Z2394  | -      | hypothetical protein                                              |
| Indel-79               | ECs1949 | Z2393  | -      | hypothetical protein                                              |
| Indel-79               | ECs1950 | Z2392  | -      | hypothetical protein                                              |
| Indel-79               | ECs1951 | Z2391  | -      | hypothetical protein                                              |
| Indel-79               | ECs1952 | Z2390  | -      | hypothetical protein                                              |
| Indel-79               | ECs1953 | Z2389  | -      | putative methyltransferase                                        |
| Indel-79               | ECs1954 | Z2387  | -      | hypothetical protein                                              |
| Indel-79               | ECs1955 | Z2386  | -      | hypothetical protein                                              |
| Indel-79               | ECs1956 | Z2385  | -      | hypothetical protein                                              |
| Indel-79               | ECs1957 |        | -      | hypothetical protein                                              |
| Indel-79               | ECs1958 | Z2384  | -      | putative antitermination protein                                  |
| Indel-79               | ECs1958 | Z2382  | -      | putative antitermination protein                                  |
| Indel-79               | ileZ4   | RNA039 | ileZ4  | Ile tRNA                                                          |
| Indel-79               | tRNA25  |        | tRNA25 | -                                                                 |

Table S10. The orthologue table of the O55 and O157 strains Page 63

| Locus_tag <sup>a</sup> |          |          | Gene  | Product                                                                           |
|------------------------|----------|----------|-------|-----------------------------------------------------------------------------------|
| CB9615                 | Sakai    | EDL933   |       |                                                                                   |
| Indel-79               | argO4    | RNA038   | argO4 | Arg tRNA                                                                          |
| Indel-79               | ECs1959  | Z2379    | -     | hypothetical protein                                                              |
| Indel-79               | ECs1960  | Z2378    | -     | hypothetical protein                                                              |
| Indel-79               | ECs1961  | Z2377    | -     | hypothetical protein                                                              |
| Indel-80               | ECs1962  | Indel-80 | -     | putative holin protein                                                            |
| Indel-80               | ECs1963  | Indel-80 | -     | hypothetical protein                                                              |
| Indel-80               | ECs1964  | Indel-80 | -     | putative endolysin                                                                |
| Indel-80               | ECs1965  | Indel-80 | -     | putative antirepressor protein                                                    |
| Indel-80               | ECs1966  | Indel-80 | -     | putative endopeptidase                                                            |
| Indel-80               | ECs1967  | Indel-80 | -     | hypothetical protein                                                              |
| Indel-80               | ECs1968  | Indel-80 | -     | putative DNase                                                                    |
| Indel-80               | ECs1969  | Indel-80 | -     | hypothetical protein                                                              |
| Indel-80               | ECs1970  | Indel-80 | -     | putative terminase small subunit                                                  |
| Indel-80               | ECs1971  | Indel-80 | -     | putative terminase large subunit                                                  |
| Indel-80               | ECs1972  | Indel-80 | -     | putative phage major head protein/prohead protease                                |
| Indel-80               | ECs1973  | Indel-80 | -     | hypothetical protein                                                              |
| Indel-80               | ECs1974  | Indel-80 | -     | putative portal protein                                                           |
| Indel-80               | ECs1975  | Indel-80 | -     | hypothetical protein                                                              |
| Indel-80               | ECs1976  | Indel-80 | -     | hypothetical protein                                                              |
| Indel-80               | ECs1977  | Indel-80 | -     | putative head-tail adaptor                                                        |
| Indel-80               | ECs1978  | Indel-80 | -     | hypothetical protein                                                              |
| Indel-80               | ECs1979  | Indel-80 | -     | hypothetical protein                                                              |
| Indel-80               | ECs1980  | Indel-80 | -     | major tail protein                                                                |
| Indel-80               | ECs1981  | Indel-80 | -     | putative tail assembly chaperon                                                   |
| Indel-80               | ECs1982  | Indel-80 | -     | hypothetical protein                                                              |
| Indel-80               | ECs1983  | Indel-80 | -     | putative tail length tape measure protein                                         |
| Indel-80               | ECs1984  | Indel-80 | -     | putative minor tail protein                                                       |
| Indel-80               | ECs1985  | Indel-80 | -     | putative minor tail protein                                                       |
| Indel-80               | ECs1986  | Indel-80 | -     | putative tail assembly protein                                                    |
| Indel-80               | ECs1987  | Indel-80 | -     | putative tail assembly protein                                                    |
| Indel-80               | ECs1988  | Indel-80 | -     | hypothetical protein                                                              |
| Indel-80               | ECs1989  | Indel-80 | -     | putative copper/zinc-superoxide dismutase                                         |
| Indel-80               | ECs1990  | Indel-80 | -     | putative host specificity protein                                                 |
| Indel-81               | Indel-81 | Z2343    | -     | partial putative outer membrane protein Lom precursor encoded by prophage CP-933R |
| Indel-81               | Indel-81 | Z2344    | -     | putative tail fiber protein encoded by prophage CP-                               |
| Indel-81               | Indel-81 | Z2346    | -     | partial putative phage tail protein encoded by prophage CP-933R                   |
| Indel-81               | Indel-81 | Z2347    | -     | putative copper-zinc superoxide dismutase encoded within prophage CP-933R         |
| Indel-81               | Indel-81 | Z2348    | -     | partial putative phage tail protein encoded by prophage CP-933R                   |
| Indel-81               | Indel-81 | Z2350    | -     | partial putative phage tail protein encoded by prophage CP-933R                   |

Table S10. The orthologue table of the O55 and O157 strains Page 64

| Locus_tag <sup>a</sup> |          |          | Gene | Product                                                                        |
|------------------------|----------|----------|------|--------------------------------------------------------------------------------|
| CB9615                 | Sakai    | EDL933   |      |                                                                                |
| Indel-81               | Indel-81 | Z2351    | -    | putative tail component of prophage CP-933R                                    |
| Indel-81               | Indel-81 | Z2352    | -    | putative tail component of prophage CP-933R                                    |
| Indel-81               | Indel-81 | Z2353    | -    | putative tail component of prophage CP-933R                                    |
| Indel-81               | Indel-81 | Z2354    | -    | partial putative tail component of prophage CP-933R                            |
| Indel-81               | Indel-81 | Z2355    | -    | partial putative tail component of prophage CP-933R                            |
| Indel-81               | Indel-81 | Z2356    | -    | putative tail component of prophage CP-933R                                    |
| Indel-81               | Indel-81 | Z2357    | -    | putative tail component of prophage CP-933R                                    |
| Indel-81               | Indel-81 | Z2358    | -    | putative tail component of prophage CP-933R                                    |
| Indel-81               | Indel-81 | Z2359    | -    | partial putative capsid structural protein of prophage CP-933R                 |
| Indel-81               | Indel-81 | Z2360    | -    | putative capsid protein of prophage CP-933R                                    |
| Indel-81               | Indel-81 | Z2361    | -    | putative capsid assembly protein of prophage CP-933R                           |
| Indel-81               | Indel-81 | Z2362    | -    | putative capsid protein of prophage CP-933R                                    |
| Indel-81               | Indel-81 | Z2363    | -    | putative DNA packaging protein of prophage CP-933R                             |
| Indel-81               | Indel-81 | Z2364    | -    | putative DNA packaging protein of prophage CP-933R;<br>terminase large subunit |
| Indel-81               | Indel-81 | Z2365    | -    | putative DNA packaging protein of prophage CP-933R;<br>terminase small subunit |
| Indel-81               | Indel-81 | Z2366    | -    | unknown protein encoded within prophage CP-933R                                |
| Indel-81               | Indel-81 | Z2367    | -    | unknown protein encoded within prophage CP-933R                                |
| Indel-81               | Indel-81 | Z2368    | -    | unknown protein encoded within prophage CP-933R                                |
| Indel-81               | Indel-81 | Z2369    | -    | putative endopeptidase Rz of prophage CP-933R                                  |
| Indel-81               | Indel-81 | Z2370    | -    | unknown protein encoded within prophage CP-933R                                |
| Indel-81               | Indel-81 | Z2371    | -    | putative lysozyme R of prophage CP-933R                                        |
| Indel-81               | Indel-81 | Z2372    | -    | unknown protein encoded within prophage CP-933R                                |
| Indel-81               | Indel-81 | Z2374    | -    | putative holin protein of prophage CP-933R                                     |
| Indel-81               | Indel-81 | Z2375    | -    | orf; hypothetical protein in IS629 within prophage CP-                         |
| Indel-81               | Indel-81 | Z2376    | -    | putative IS629 transposase within prophage CP-933R                             |
| Indel-82               | ECs1991  | Z2342    | -    | putative outer membrane protein                                                |
|                        | ECs1992  | Z2340    | -    | putative tail fiber protein                                                    |
| G2583_1701             | Indel-83 | Indel-83 | racC | Putative bacteriophage protein                                                 |
| G2583_1702             | Indel-83 | Indel-83 | ydaE | Putative bacteriophage protein                                                 |
| G2583_1703             | Indel-83 | Indel-83 | kilR | Putative cell division inhibitor protein                                       |
| G2583_1704             | Indel-83 | Indel-83 | -    | conserved hypothetical protein                                                 |
| G2583_1705             | Indel-83 | Indel-83 | racR | Rac prophage repressor                                                         |
| G2583_1706             | Indel-83 | Indel-83 | ydaS | putative tail fiber protein                                                    |
| G2583_1707             | Indel-83 | Indel-83 | ydaT | conserved hypothetical protein                                                 |
| G2583_1708             | Indel-83 | Indel-83 | ydaU | hypothetical protein                                                           |
| G2583_1709             | Indel-83 | Indel-83 | ydaV | Putative DNA replication factor encoded by prophage CP-933R                    |
| G2583_1710             | Indel-83 | Indel-83 | ydaW | conserved hypothetical protein                                                 |
| G2583_1711             | Indel-83 | Indel-83 | renP | hypothetical protein                                                           |
| G2583_1712             | Indel-83 | Indel-83 | -    | unknown protein encoded by cryptic prophage CP-933P                            |
| G2583_1713             | Indel-83 | Indel-83 | -    | conserved hypothetical protein                                                 |



Table S10. The orthologue table of the O55 and O157 strains Page 65

| Locus_tag <sup>a</sup> |          |          | Gene | Product                                                               |
|------------------------|----------|----------|------|-----------------------------------------------------------------------|
| CB9615                 | Sakai    | EDL933   |      |                                                                       |
| G2583_1714             | Indel-83 | Indel-83 | -    | hypothetical protein                                                  |
| G2583_1715             | Indel-83 | Indel-83 | mokP | Putative cell killing protein encoded within cryptic prophage CP-933P |
| G2583_1716             | Indel-83 | Indel-83 | -    | Putative bacteriophage cohesive ends                                  |
| G2583_1717             | Indel-83 | Indel-83 | -    | hypothetical protein                                                  |
| G2583_1718             | Indel-83 | Indel-83 | -    | Putative antitermination protein                                      |
| G2583_1719             | Indel-83 | Indel-83 | -    | unknown protein encoded by prophage CP-933O                           |
| G2583_1720             | Indel-83 | Indel-83 | -    | YjhS                                                                  |
| G2583_1721             | Indel-83 | Indel-83 | -    | hypothetical protein                                                  |
| G2583_1722             | Indel-83 | Indel-83 | -    | Putative lysis protein S of prophage CP-933V                          |
| G2583_1723             | Indel-83 | Indel-83 | -    | putative endolysin                                                    |
| G2583_1724             | Indel-83 | Indel-83 | -    | putative endolysin                                                    |
| G2583_1725             | Indel-83 | Indel-83 | -    | Anti-repressor protein Ant                                            |
| G2583_1726             | Indel-83 | Indel-83 | -    | Endopeptidase                                                         |
| G2583_1727             | Indel-83 | Indel-83 | -    | hypothetical protein                                                  |
| G2583_1728             | Indel-83 | Indel-83 | -    | hypothetical protein                                                  |
| G2583_1729             | Indel-83 | Indel-83 | -    | conserved hypothetical protein                                        |
| G2583_1730             | Indel-83 | Indel-83 | -    | Phage terminase large subunit                                         |
| G2583_1731             | Indel-83 | Indel-83 | -    | hypothetical protein                                                  |
| G2583_1732             | Indel-83 | Indel-83 | -    | Peptidase S14, ClpP                                                   |
| G2583_1733             | Indel-83 | Indel-83 | -    | unknown protein encoded within prophage CP-933U                       |
| G2583_1734             | Indel-83 | Indel-83 | -    | hypothetical protein                                                  |
| G2583_1735             | Indel-83 | Indel-83 | -    | Putative tail fiber component Z                                       |
| G2583_1736             | Indel-83 | Indel-83 | -    | putative tail fiber component U of prophage CP-933U                   |
| G2583_1737             | Indel-83 | Indel-83 | -    | hypothetical protein                                                  |
| G2583_1738             | Indel-83 | Indel-83 | -    | Minor tail protein G                                                  |
| G2583_1739             | Indel-83 | Indel-83 | -    | Minor tail protein T                                                  |
| G2583_1740             | Indel-83 | Indel-83 | -    | Minor tail protein H                                                  |
| G2583_1741             | Indel-83 | Indel-83 | -    | putative tail component of prophage CP-933O                           |
| G2583_1742             | Indel-83 | Indel-83 | -    | Phage-related protein                                                 |
| G2583_1743             | Indel-83 | Indel-83 | -    | Putative tail fiber component                                         |
| G2583_1744             | Indel-83 | Indel-83 | -    | putative tail assembly protein                                        |
| G2583_1745             | Indel-83 | Indel-83 | -    | Phage-related protein, tail component                                 |
| G2583_1746             | Indel-83 | Indel-83 | -    | Putative outer membrane protein Lom of prophage CP-933O               |
| G2583_1747             | Indel-83 | Indel-83 | -    | putative tail fiber protein                                           |
|                        | ECs1993  |          | -    | hypothetical protein                                                  |
| G2583_1748             | ECs1994  | Z2339    | -    | unknown protein encoded by prophage CP-933R                           |
| G2583_1749             | ECs1995  | Z2338    | -    | unknown protein encoded by prophage CP-933R                           |
| G2583_1750             | ECs1996  | Z2337    | -    | unknown protein encoded by prophage CP-933R                           |
| G2583_1751             | ECs1997  | Z2335    | uspF | Universal stress protein F                                            |
| G2583_1752             | ECs1998  | Z2334    | ompN | Outer membrane protein N                                              |
| G2583_1752             | ECs1999  | Z2333    | ompN | Outer membrane protein N                                              |
| G2583_1753             |          |          | -    | ncRNA                                                                 |

Table S10. The orthologue table of the O55 and O157 strains Page 66

| Locus_tag <sup>a</sup> |         |        | Gene | Product                                                         |
|------------------------|---------|--------|------|-----------------------------------------------------------------|
| CB9615                 | Sakai   | EDL933 |      |                                                                 |
| G2583_1754             | ECs2000 | Z2332  | ydbK | Pyruvate-flavodoxin oxidoreductase                              |
| G2583_1755             |         |        | ydbJ | hypothetical protein                                            |
| G2583_1756             | ECs2001 | Z2330  | hslJ | Heat shock protein HslJ                                         |
| G2583_1757             | ECs2002 | Z2329  | ldhA | D-lactate dehydrogenase                                         |
| G2583_1758             | ECs2003 | Z2328  | ydbH | hypothetical protein                                            |
| G2583_1759             | ECs2004 | Z2327  | ynbE | hypothetical protein                                            |
| G2583_1760             | ECs2005 | Z2326  | ydbL | hypothetical protein                                            |
| G2583_1761             |         | Z2325  | entS | hypothetical protein                                            |
| G2583_1762             | ECs2006 | Z2323  | -    | putative BigA-like protein                                      |
| G2583_1763             | ECs2007 | Z2322  | entS | putative outer membrane protein                                 |
| G2583_1764             | ECs2008 | Z2321  | ydbC | Oxidoreductase, aldo/keto reductase family                      |
| G2583_1765             | ECs2009 | Z2320  | ydbD | hypothetical protein                                            |
| G2583_1766             | ECs2010 | Z2319  | ynbA | Phosphatidylglycerophosphate synthase                           |
| G2583_1767             | ECs2011 | Z2318  | ynbB | Phosphatidate cytidyltransferase                                |
| G2583_1768             | ECs2012 | Z2317  | ynbC | hypothetical protein                                            |
| G2583_1769             | ECs2013 | Z2316  | ynbD | hypothetical protein                                            |
| G2583_1770             | ECs2014 | Z2315  | azoR | FMN-dependent NADH-azoreductase                                 |
| G2583_1771             | ECs2015 | Z2313  | hrpA | HrpA-like helicases                                             |
| G2583_1772             | ECs2016 | Z2312  | -    | hypothetical protein                                            |
| G2583_1773             | ECs2017 | Z2311  | -    | hypothetical protein                                            |
| G2583_1774             | ECs2018 | Z2310  | -    | hypothetical protein                                            |
| G2583_1775             | ECs2019 | Z2309  | -    | hypothetical protein                                            |
| G2583_1776             | ECs2020 | Z2308  | ydcF | hypothetical protein                                            |
| G2583_1777             | ECs2021 | Z2306  | aldA | Aldehyde dehydrogenase A                                        |
| G2583_1778             | ECs2022 | Z2304  | gapC | Glyceraldehyde-3-phosphate dehydrogenase C                      |
| G2583_1779             | ECs2023 | Z2303  | cybB | Nickel-dependent hydrogenase, b-type cytochrome subunit         |
| G2583_1780             |         |        | -    | ncRNA                                                           |
| G2583_1781             | ECs2024 | Z2302  | ydcA | hypothetical protein                                            |
| G2583_1782             | ECs2025 | Z2301  | mokB | hypothetical protein                                            |
| G2583_1783             | ECs2026 | Z2300  | trg  | Methyl-accepting chemotaxis protein III, ribose sensor receptor |
| G2583_1784             | ECs2027 | Z2299  | ydcI | putative transcriptional regulator LYSR-type                    |
| G2583_1785             | ECs2028 | Z2298  | ydcJ | hypothetical protein                                            |
| G2583_1785             | ECs2028 | Z2297  | ydcJ | hypothetical protein                                            |
| G2583_1785             | ECs2028 | Z2296  | ydcJ | hypothetical protein                                            |
| G2583_1786             | ECs2029 | Z2294  | mdoD | Glucans biosynthesis protein D precursor                        |
| G2583_1787             | ECs2030 | Z2293  | -    | hypothetical protein                                            |
| G2583_1788             | ECs2031 | Z2292  | ydcH | hypothetical protein                                            |
| G2583_1789             | ECs2032 | Z2291  | rimL | Ribosomal-protein-serine acetyltransferase                      |
| G2583_1790             | ECs2033 | Z2290  | ydcK | hypothetical protein                                            |
| G2583_1791             | ECs2034 | Z2289  | tehA | Tellurite resistance protein tehA                               |
| G2583_1792             | ECs2035 | Z2288  | tehB | Tellurite resistance protein TehB                               |
| G2583_1793             | ECs2036 | Z2287  | ydcL | Uncharacterized lipoprotein ydcL precursor                      |

Table S10. The orthologue table of the O55 and O157 strains Page 67

| Locus_tag <sup>a</sup> |         |        | Gene | Product                                                                                                      |
|------------------------|---------|--------|------|--------------------------------------------------------------------------------------------------------------|
| CB9615                 | Sakai   | EDL933 |      |                                                                                                              |
| G2583_1794             | ECs2038 | Z2286  | ydcO | hypothetical protein                                                                                         |
| G2583_1795             | ECs2037 | Z2285  | ydcN | DNA-binding protein                                                                                          |
| G2583_1796             | ECs2039 | Z2284  | ydcP | Peptidase, U32 family                                                                                        |
| G2583_1797             | ECs2040 | Z2283  | yncJ | hypothetical protein                                                                                         |
| G2583_1798             | ECs2041 | Z2282  | -    | hypothetical protein                                                                                         |
| G2583_1799             | ECs2042 | Z2281  | ydcQ | Predicted DNA-binding transcriptional regulator                                                              |
| G2583_1800             | ECs2043 | Z2280  | ydcR | multi modular; putative transcriptional regulator; also putative ATP-binding component of a transport system |
| G2583_1801             | ECs2044 | Z2279  | ydcS | ABC transporter, periplasmic substrate-binding protein                                                       |
| G2583_1802             | ECs2045 | Z2278  | ydcT | ABC transporter, ATP-binding protein                                                                         |
| G2583_1803             | ECs2046 | Z2277  | ydcU | ABC transporter, permease protein                                                                            |
| G2583_1804             | ECs2047 | Z2276  | ydcV | Putative transport system permease protein                                                                   |
| G2583_1805             | ECs2048 | Z2275  | ydcW | Gamma-aminobutyraldehyde dehydrogenase                                                                       |
| G2583_1806             | ECs2049 | Z2274  | ydcX | hypothetical protein                                                                                         |
| G2583_1807             | ECs2050 | Z2273  | ydcY | hypothetical protein                                                                                         |
| G2583_1808             | ECs2051 | Z2272  | ydcZ | hypothetical protein                                                                                         |
| G2583_1809             | ECs2052 | Z2271  | yncA | Acetyltransferase, GNAT family                                                                               |
| G2583_1810             | ECs2053 | Z2270  | yncB | Putative NADP-dependent oxidoreductase yncB                                                                  |
| G2583_1811             | ECs2054 | Z2269  | yncC | putative DNA-binding transcriptional regulator                                                               |
| G2583_1812             | ECs2055 | Z2268  | yncD | TonB-dependent receptor                                                                                      |
| G2583_1813             | ECs2056 | Z2267  | yncE | Uncharacterized conserved protein                                                                            |
| G2583_1814             | ECs2057 | Z2266  | ansP | L-asparagine permease                                                                                        |
| G2583_1815             | ECs2058 | Z2265  | yncG | putative transferase                                                                                         |
| G2583_1816             | ECs2059 | Z2264  | yncH | conserved hypothetical protein                                                                               |
| G2583_1817             |         | Z2263  | -    | hypothetical protein                                                                                         |
| G2583_1818             | ECs2060 | Z2262  | vgrE | unknown protein associated with Rhs element                                                                  |
| G2583_1819             | ECs2061 | Z2261  | rhsE | protein rhsE                                                                                                 |
| G2583_1819             | ECs2061 | Z2259  | rhsE | protein rhsE                                                                                                 |
| G2583_1819             | ECs2061 | Z2257  | rhsE | protein rhsE                                                                                                 |
| G2583_1820             |         | Z2256  | -    | DsORF-e4                                                                                                     |
| G2583_1821             |         | Z2255  | -    | unknown protein associated with Rhs element                                                                  |
| G2583_1822             |         | Z2254  | ydcC | H repeat-associated protein                                                                                  |
| G2583_1822             | ECs2062 | Z2253  | ydcC | H repeat-associated protein                                                                                  |
| G2583_1822             | ECs2063 |        | ydcC | H repeat-associated protein                                                                                  |
| G2583_1823             | ECs2064 | Z2252  | pptA | Probable tautomerase ydcE                                                                                    |
| G2583_1824             | ECs2065 | Z2251  | yddH | hypothetical protein                                                                                         |
| G2583_1825             | ECs2066 | Z2250  | nhoA | Putative N-hydroxyarylamine O-acetyltransferase                                                              |
| G2583_1825             |         | Z2249  | nhoA | Putative N-hydroxyarylamine O-acetyltransferase                                                              |
| G2583_1826             | ECs2067 | Z2248  | yddE | Uncharacterized isomerase yddE                                                                               |
| G2583_1827             | ECs2068 | Z2247  | narV | Nitrate reductase 2, gamma subunit                                                                           |
| G2583_1828             | ECs2069 | Z2246  | narW | Nitrate reductase molybdenum cofactor assembly chaperone 2                                                   |
| G2583_1829             | ECs2070 | Z2245  | narY | Nitrate reductase 2, beta subunit                                                                            |
| G2583_1830             | ECs2071 | Z2244  | narZ | Nitrate reductase 2, alpha subunit                                                                           |

Table S10. The orthologue table of the O55 and O157 strains Page 68

| Locus_tag <sup>a</sup> |         |        | Gene | Product                                                              |
|------------------------|---------|--------|------|----------------------------------------------------------------------|
| CB9615                 | Sakai   | EDL933 |      |                                                                      |
| G2583_1831             | ECs2072 | Z2243  | narU | Nitrite extrusion protein 2                                          |
| G2583_1832             | ECs2073 | Z2242  | yddJ | Leucine-rich repeat protein                                          |
| G2583_1833             | ECs2074 | Z2241  | -    | hypothetical protein                                                 |
| G2583_1834             | ECs2075 | Z2240  | -    | hypothetical protein                                                 |
| G2583_1835             | ECs2076 | Z2239  | -    | Gram-negative porin family                                           |
| G2583_1836             | ECs2077 | Z2238  | yddG | hypothetical protein                                                 |
| G2583_1837             | ECs2078 | Z2236  | fdnG | nitrate-inducible formate dehydrogenase-N alpha                      |
| G2583_1838             | ECs2079 | Z2235  | fdnH | Formate dehydrogenase, nitrate-inducible, iron-sulfur subunit        |
| G2583_1839             | ECs2080 | Z2234  | fdnI | Formate dehydrogenase-N gamma subunit                                |
| G2583_1840             | ECs2081 | Z2233  | yddM | hypothetical protein                                                 |
| G2583_1841             | ECs2082 | Z2232  | adhP | Zn-dependent alcohol dehydrogenases                                  |
| G2583_1842             | ECs2083 | Z2231  | maeA | NAD-dependent malic enzyme                                           |
| G2583_1843             | ECs2084 | Z2230  | sra  | Stationary-phase-induced ribosome-associated protein                 |
| G2583_1844             | ECs2085 | Z2229  | bdm  | biofilm-dependent modulation protein                                 |
| G2583_1845             | ECs2086 | Z2228  | osmC | Peroxiredoxin OsmC                                                   |
| G2583_1846             | ECs2087 | Z2227  | ddpF | Putative ABC transport system ATP-binding protein                    |
| G2583_1847             | ECs2088 | Z2226  | ddpD | ABC transporter, ATP-binding protein                                 |
| G2583_1848             | ECs2089 | Z2225  | ddpC | Inner membrane ABC transporter permease protein                      |
| G2583_1849             | ECs2090 | Z2224  | ddpB | Binding-protein-dependent transport systems inner membrane component |
| G2583_1850             | ECs2091 | Z2223  | ddpA | Putative ABC transporter periplasmic-binding protein                 |
| G2583_1851             | ECs2092 | Z2222  | ddpX | D-alanyl-D-alanine dipeptidase                                       |
| G2583_1852             | ECs2093 | Z2221  | dos  | FOG: PAS/PAC domain                                                  |
| G2583_1852             | ECs2094 | Z2220  | dos  | FOG: PAS/PAC domain                                                  |
| G2583_1853             | ECs2095 | Z2219  | yddV | Diguanylate cyclase yddV                                             |
| G2583_1854             | ECs2096 | Z2217  | yddW | Uncharacterized lipoprotein yddW precursor                           |
| G2583_1855             | ECs2097 | Z2216  | gadC | Probable glutamate/gamma-aminobutyrate antiporter                    |
| G2583_1856             | ECs2098 | Z2215  | gadB | Glutamate decarboxylase beta                                         |
| G2583_1857             | ECs2099 | Z2214  | pqqL | Putative peptidase                                                   |
| G2583_1858             | ECs2100 | Z2213  | yddB | TonB-dependent receptor                                              |
| G2583_1859             | ECs2101 | Z2212  | yddA | Inner membrane ABC transporter ATP-binding protein                   |
| G2583_1860             | ECs2102 | Z2211  | ydeM | Putative enzyme                                                      |
| G2583_1861             | ECs2103 | Z2210  | ydeN | Putative sulfatase                                                   |
| G2583_1862             | ECs2104 | Z2209  | ydeO | transcriptional regulator YdeO                                       |
| G2583_1863             | ECs2105 | Z2208  | -    | Two-component-system connector protein yneN                          |
| G2583_1864             | ECs2106 | Z2207  | ydeP | putative oxidoreductase major subunit                                |
| G2583_1865             | ECs2107 | Z2206  | ydeQ | transcriptional regulator BoIA                                       |
| G2583_1866             | ECs2108 | Z2205  | ydeR | Uncharacterized fimbrial-like protein ydeR precursor                 |
| G2583_1867             | ECs2109 | Z2204  | ydeS | biofilm-dependent modulation protein                                 |
| G2583_1868             | ECs2110 | Z2202  | fimD | Fimbrial usher family protein                                        |
|                        | ECs2111 |        | -    | hypothetical protein                                                 |
| G2583_1868             |         | Z2203  | fimD | Fimbrial usher family protein                                        |
| G2583_1869             | ECs2112 | Z2201  | FimC | P pilus assembly protein, chaperone PapD                             |

Table S10. The orthologue table of the O55 and O157 strains Page 69

| Locus_tag <sup>a</sup> |          |          | Gene | Product                                                                       |
|------------------------|----------|----------|------|-------------------------------------------------------------------------------|
| CB9615                 | Sakai    | EDL933   |      |                                                                               |
| G2583_1870             | ECs2113  | Z2200    | fmlA | Putative Fml fimbriae subunit                                                 |
| G2583_1871             | ECs2114  | Z2199    | yneL | Putative ARAC-type regulatory protein                                         |
| G2583_1872             | ECs2115  | Z2197    | hipA | regulator with hipB                                                           |
| G2583_1873             | Indel-91 | Indel-91 | hipB | transcriptional regulator HipB                                                |
| G2583_1874             | ECs2116  | Z2196    | ydeU | Outer membrane autotransporter barrel domain protein precursor                |
| G2583_1875             | ECs2117  | Z2195    | ydeK | hypothetical protein                                                          |
| G2583_1876             | ECs2118  | Z2194    | lsrK | Carbohydrate kinase FGGY                                                      |
| G2583_1877             | ECs2119  | Z2193    | lsrR | putative transcriptional regulator, sorC family                               |
| G2583_1878             | ECs2120  | Z2192    | lsrA | Autoinducer-2 ABC transporter, ATP-binding protein                            |
| G2583_1879             | ECs2121  | Z2191    | lsrC | Autoinducer-2 ABC transporter, permease protein LsrC                          |
| G2583_1880             | ECs2122  | Z2190    | lsrD | Autoinducer-2 ABC transporter, permease protein LsrD                          |
| G2583_1881             | ECs2123  | Z2189    | lsrB | Autoinducer-2 ABC transporter, periplasmic autoinducer-2-binding protein LsrB |
| G2583_1882             | ECs2124  | Z2188    | lsrF | Uncharacterized aldolase yneB                                                 |
| G2583_1883             | ECs2125  | Z2187    | lsrG | autoinducer-2 (AI-2) modifying protein LsrG                                   |
| G2583_1884             | ECs2126  | Z2186    | tam  | Trans-aconitate 2-methyltransferase                                           |
| G2583_1885             | ECs2127  | Z2185    | yneE | hypothetical protein                                                          |
| G2583_1886             | ECs2128  | Z2184    | uxaB | Altronate oxidoreductase                                                      |
| G2583_1887             | ECs2129  | Z2182    | yneF | Diguanylate cyclase (GGDEF) domain protein                                    |
| G2583_1887             |          | Z2181    | yneF | Diguanylate cyclase (GGDEF) domain protein                                    |
| G2583_1888             | ECs2130  | Z2180    | yneG | hypothetical protein                                                          |
| G2583_1889             | ECs2131  | Z2179    | yneH | Glutaminase 2                                                                 |
| G2583_1890             | ECs2132  | Z2178    | yneI | NAD-dependent aldehyde dehydrogenases                                         |
| G2583_1891             | ECs2133  | Z2177    | yneJ | putative transcriptional regulator LYSR-type                                  |
| G2583_1892             | ECs2134  | Z2176    | yneK | hypothetical protein                                                          |
| G2583_1892             |          | Z2175    | yneK | hypothetical protein                                                          |
| G2583_1893             | ECs2135  | Z2173    | ydeA | Probable sugar efflux transporter                                             |
| G2583_1894             | ECs2136  | Z2172    | marC | MarC                                                                          |
| G2583_1895             | ECs2137  | Z2171    | marR | MarR                                                                          |
| G2583_1896             | ECs2138  | Z2170    | marA | Multiple antibiotic resistance protein marA                                   |
| G2583_1897             | ECs2139  | Z2169    | marB | Multiple antibiotic resistance protein MarB                                   |
| G2583_1898             | ECs2140  | Z2168    | eamA | Transporter, 10 TMS drug/metabolite exporter (DME) family                     |
| G2583_1899             | ECs2141  | Z2166    | ydeE | Transporter, major facilitator family                                         |
| G2583_1900             |          | Z2165    | -    | Rhodanese domain protein                                                      |
|                        | ECs2142  |          | -    | hypothetical protein                                                          |
| G2583_1901             | ECs2143  | Z2164    | ftrA | Transcriptional activator FtrA                                                |
| G2583_1902             | ECs2144  | Z2163    | ydeH | Diguanylate cyclase                                                           |
| G2583_1903             | ECs2145  | Z2162    | ydeI | hypothetical protein                                                          |
| G2583_1904             | ECs2146  | Z2161    | ydeJ | Competence/damage-inducible protein CinA C-terminal domain protein            |
| G2583_1905             | ECs2147  | Z2160    | dcp  | Peptidyl-dipeptidase Dcp                                                      |
| G2583_1906             | ECs2148  | Z2158    | ydfG | L-allo-threonine dehydrogenase, NAD(P)-binding                                |

Table S10. The orthologue table of the O55 and O157 strains Page 70

| Locus_tag <sup>a</sup> |          |          | Gene | Product                                                                    |
|------------------------|----------|----------|------|----------------------------------------------------------------------------|
| CB9615                 | Sakai    | EDL933   |      |                                                                            |
| G2583_1907             | ECs2149  | Z2157    | ydfH | Hypothetical transcriptional regulator ydfH                                |
| G2583_1908             | ECs2150  | Z2156    | ydfZ | Putative selenoprotein ydfZ                                                |
| G2583_1909             | ECs2151  | Z2155    | ydfI | Mannitol dehydrogenase family protein                                      |
| G2583_1910             | ECs2152  | Z2153    | ydfJ | Inner membrane metabolite transport protein ydfJ                           |
| G2583_1911             | ECs2153  | Z2152    | -    | unknown protein encoded within CP-933O                                     |
| Indel-92               | ECs2154  | Z2151    | -    | hypothetical protein                                                       |
| Indel-92               | ECs2155  | Z2150    | -    | hypothetical protein                                                       |
| Indel-92               | ECs2156  | Z2149    | -    | hypothetical protein                                                       |
| Indel-92               | ECs2157  | Z2148    | -    | hypothetical protein                                                       |
| Indel-92               | ECs2158  |          | -    | putative tail fiber protein                                                |
| Indel-93               | ECs2159  | Indel-93 | -    | putative tail fiber protein                                                |
| Indel-93               | ECs2160  | Indel-93 | -    | putative outer host membrane protein precursor                             |
| Indel-93               | ECs2161  | Indel-93 | -    | putative host specificity protein                                          |
| Indel-93               | ECs2162  | Indel-93 | -    | putative tail assembly protein                                             |
| Indel-93               | ECs2163  | Indel-93 | -    | putative tail assembly protein                                             |
| Indel-93               | ECs2164  | Indel-93 | -    | putative minor tail protein                                                |
| Indel-93               | ECs2165  | Indel-93 | -    | putative minor tail protein                                                |
| Indel-93               | ECs2166  | Indel-93 | -    | putative tail length tape measure protein precursor                        |
| Indel-93               | ECs2167  | Indel-93 | -    | putative minor tail protein                                                |
| Indel-93               | ECs2168  | Indel-93 | -    | minor tail protein                                                         |
| Indel-93               | ECs2169  | Indel-93 | -    | hypothetical protein                                                       |
| Indel-93               | ECs2170  | Indel-93 | -    | putative minor tail protein                                                |
| Indel-93               | ECs2171  | Indel-93 | -    | putative minor tail protein                                                |
| Indel-93               | ECs2172  | Indel-93 | -    | putative tail attachment protein                                           |
| Indel-93               | ECs2173  | Indel-93 | -    | putative DNA-packaging protein                                             |
| Indel-93               | ECs2174  | Indel-93 | -    | putative major capsid protein                                              |
| Indel-93               | ECs2175  | Indel-93 | -    | putative head decoration protein                                           |
| Indel-93               | ECs2176  | Indel-93 | -    | putative minor capsid protein precursor                                    |
| Indel-93               | ECs2177  | Indel-93 | -    | putative portal protein                                                    |
| Indel-93               | ECs2178  | Indel-93 | -    | putative head-to-tail joining protein                                      |
| Indel-93               | ECs2179  | Indel-93 | -    | putative terminase large subunit                                           |
| Indel-93               | ECs2180  | Indel-93 | -    | putative terminase small subunit                                           |
| Indel-93               | ECs2181  | Indel-93 | -    | hypothetical protein                                                       |
| Indel-93               | ECs2182  | Indel-93 | -    | putative transcriptional regulator                                         |
| Indel-93               | ECs2184  | Indel-93 | -    | putative endopeptidase                                                     |
| Indel-93               | ECs2183  | Indel-93 | -    | putative lipoprotein Rz1 precursor                                         |
| Indel-93               | ECs2185  | Indel-93 | -    | putative antirepressor protein                                             |
| Indel-93               | ECs2186  | Indel-93 | -    | putative endolysin                                                         |
| Indel-93               | ECs2187  | Indel-93 | -    | hypothetical protein                                                       |
| Indel-93               | ECs2188  | Indel-93 | -    | putative holin protein                                                     |
| Indel-93               | ECs2189  | Indel-93 | -    | hypothetical protein                                                       |
| Indel-94               | Indel-94 | Z2108    | -    | hypothetical phage protein similar to YjhS encoded within prophage CP-933O |

Table S10. The orthologue table of the O55 and O157 strains Page 71

| Locus_tag <sup>a</sup> |          |        | Gene | Product                                                                                            |
|------------------------|----------|--------|------|----------------------------------------------------------------------------------------------------|
| CB9615                 | Sakai    | EDL933 |      |                                                                                                    |
| Indel-94               | Indel-94 | Z2109  | -    | hypothetical phage protein similar to YjhS encoded within prophage CP-933O                         |
| Indel-94               | Indel-94 | Z2110  | -    | putative transposase encoded within prophage CP-                                                   |
| Indel-94               | Indel-94 | Z2111  | -    | putative transposase encoded within prophage CP-                                                   |
| Indel-94               | Indel-94 | Z2112  | -    | putative ClpP-like protease encoded within prophage CP-933O                                        |
| Indel-94               | Indel-94 | Z2113  | -    | unknown protein encoded within prophage CP-933O                                                    |
| Indel-94               | Indel-94 | Z2114  | -    | unknown protein encoded within prophage CP-933O                                                    |
| Indel-94               | Indel-94 | Z2115  | -    | unknown protein encoded within prophage CP-933O                                                    |
| Indel-94               | Indel-94 | Z2116  | -    | unknown protein encoded within prophage CP-933O similar to terminase large subunit of phage lambda |
| Indel-94               | Indel-94 | Z2117  | -    | unknown protein encoded within prophage CP-933O                                                    |
| Indel-94               | Indel-94 | Z2118  | -    | putative endopeptidase Rz of prophage CP-933O                                                      |
| Indel-94               | Indel-94 | Z2119  | -    | unknown protein encoded within prophage CP-933O                                                    |
| Indel-94               | Indel-94 | Z2120  | -    | putative endolysin of prophage CP-933O                                                             |
| Indel-94               | Indel-94 | Z2121  | -    | unknown protein encoded within prophage CP-933O                                                    |
| Indel-94               | Indel-94 | Z2122  | -    | putative holin protein of prophage CP-933O                                                         |
| Indel-94               | Indel-94 | Z2123  | -    | unknown protein encoded within prophage CP-933O                                                    |
| Indel-94               | Indel-94 | Z2124  | -    | unknown protein encoded within prophage CP-933O                                                    |
| Indel-94               | Indel-94 | Z2127  | -    | putative IS encoded protein encoded within prophage CP-933O                                        |
| Indel-94               | Indel-94 | Z2130  | -    | putative IS encoded protein encoded within prophage CP-933O                                        |
| Indel-94               | Indel-94 | Z2131  | -    | putative terminase large subunit of prophage CP-933O                                               |
| Indel-94               | Indel-94 | Z2132  | -    | putative head completion protein of prophage CP-933O                                               |
| Indel-94               | Indel-94 | Z2133  | -    | putative capsid assembly protein of prophage CP-933O                                               |
| Indel-94               | Indel-94 | Z2134  | -    | putative head-tail preconnector protein of prophage CP-933O                                        |
| Indel-94               | Indel-94 | Z2135  | -    | putative capsid protein small subunit of prophage CP-933O                                          |
| Indel-94               | Indel-94 | Z2136  | -    | partial putative major capsid protein of prophage CP-                                              |
| Indel-94               | Indel-94 | Z2137  | -    | putative tail component of prophage CP-933O                                                        |
| Indel-94               | Indel-94 | Z2138  | -    | putative tail component of prophage CP-933O                                                        |
| Indel-94               | Indel-94 | Z2139  | -    | putative tail component of prophage CP-933O                                                        |
| Indel-94               | Indel-94 | Z2140  | -    | putative tail component of prophage CP-933O                                                        |
| Indel-94               | Indel-94 | Z2141  | -    | putative tail component of prophage CP-933O                                                        |
| Indel-94               | Indel-94 | Z2142  | -    | putative tail component of prophage CP-933O                                                        |
| Indel-94               | Indel-94 | Z2143  | -    | putative tail component of prophage CP-933O                                                        |
| Indel-94               | Indel-94 | Z2144  | -    | putative tail component of prophage CP-933O                                                        |
| Indel-94               | Indel-94 | Z2145  | -    | putative tail component of prophage CP-933O                                                        |
| Indel-94               | Indel-94 | Z2146  | -    | putative outer membrane protein Lom precursor of prophage CP-933O                                  |
| Indel-92               | Indel-92 | Z2147  | -    | putative tail fiber protein of prophage CP-933O                                                    |
| Indel-95               |          | Z2107  | -    | unknown protein encoded within prophage CP-933O                                                    |

Table S10. The orthologue table of the O55 and O157 strains Page 72

| Locus_tag <sup>a</sup> |         |          | Gene   | Product                                                       |
|------------------------|---------|----------|--------|---------------------------------------------------------------|
| CB9615                 | Sakai   | EDL933   |        |                                                               |
| Indel-95               | ECs2190 | Z2106    | -      | hypothetical protein                                          |
| Indel-95               | ECs2190 | Z2105    | -      | hypothetical protein                                          |
| Indel-95               | argO5   |          | argO5  | Arg tRNA                                                      |
| Indel-95               | tRNA99  |          | tRNA99 | -                                                             |
| Indel-95               | ileZ5   |          | ileZ5  | Ile tRNA                                                      |
| Indel-95               | ECs2191 | Z2104    | -      | putative transcriptional regulator                            |
| Indel-95               | ECs2192 | Z2103    | -      | hypothetical protein                                          |
| Indel-95               | ECs2193 | Z2102    | -      | putative ante-terminator protein                              |
| Indel-95               | ECs2194 | Z2101    | -      | putative crossover junction endodeoxyribonuclease             |
| Indel-95               | ECs2195 | Z2100    | -      | hypothetical protein                                          |
| Indel-95               | ECs2196 |          | -      | hypothetical protein                                          |
| Indel-95               | ECs2197 | Z2099    | -      | hypothetical protein                                          |
| Indel-95               | ECs2198 |          | -      | MokW                                                          |
| Indel-95               | ECs2199 | Z2098    | -      | hypothetical protein                                          |
| Indel-95               | ECs2200 |          | -      | hypothetical protein                                          |
| Indel-95               | ECs2201 | Z2097    | -      | hypothetical protein                                          |
| Indel-95               | ECs2202 |          | -      | hypothetical protein                                          |
| Indel-95               | ECs2203 |          | -      | hypothetical protein                                          |
| Indel-95               | ECs2204 | Z2096    | -      | hypothetical protein                                          |
| Indel-95               | ECs2204 | Z2095    | -      | hypothetical protein                                          |
| Indel-95               | ECs2205 | Z2094    | -      | putative replication protein                                  |
| Indel-95               | ECs2206 | Z2093    | -      | hypothetical protein                                          |
| Indel-95               | ECs2207 | Z2092    | -      | hypothetical protein                                          |
| Indel-95               | ECs2208 | Z2091    | -      | putative regulatory protein                                   |
| Indel-95               | ECs2209 | Z2090    | -      | putative repressor protein                                    |
| Indel-95               | ECs2210 | Z2089    | -      | hypothetical protein                                          |
| Indel-95               | ECs2211 | Z2088    | -      | hypothetical protein                                          |
| Indel-95               | ECs2212 |          | -      | hypothetical protein                                          |
| Indel-95               | ECs2213 |          | -      | hypothetical protein                                          |
| Indel-95               |         | Z2087    | -      | unknown protein encoded by prophage CP-9330                   |
| Indel-95               | dicF2   |          | dicF2  | DicF antisense RNA                                            |
| Indel-95               | ECs2214 | Z2086    | -      | putative cell division inhibitor                              |
| Indel-95               | ECs2215 |          | -      | hypothetical protein                                          |
| Indel-95               | ECs2216 | Z2085    | -      | putative exonuclease                                          |
| Indel-95               | ECs2217 | Z2084    | -      | putative integrase                                            |
| Indel-95               | ECs2218 | Z2083    | -      | hypothetical protein                                          |
| Indel-96               | ECs2219 | Indel-96 | -      | putative transposase OrfB protein of insertion sequence IS629 |
| Indel-96               | ECs2220 | Indel-96 | -      | putative transposase OrfA protein of insertion sequence IS629 |
| G2583_1912             | ECs2221 | Z2082    | tnpA   | Transposase and inactivated derivatives                       |
| Indel-98               | ECs2222 |          | -      | hypothetical protein                                          |
| Indel-98               | ECs2223 | Z2081    | -      | hypothetical protein                                          |
| Indel-98               | ECs2224 | Z2080    | -      | hypothetical protein                                          |



Table S10. The orthologue table of the O55 and O157 strains Page 73

| Locus_tag <sup>a</sup> |           |           | Gene | Product                                                        |
|------------------------|-----------|-----------|------|----------------------------------------------------------------|
| CB9615                 | Sakai     | EDL933    |      |                                                                |
| Indel-98               | ECs2224   | Z2079     | -    | hypothetical protein                                           |
| G2583_1912             | ECs2225   | Z2078     | tnpA | Transposase and inactivated derivatives                        |
| G2583_1913             | ECs2226   | Z2077     | -    | unknown protein encoded by prophage CP-933O                    |
| G2583_1914             | ECs2227   |           | -    | hypothetical protein                                           |
| G2583_1915             | ECs2228   | Z2076     | -    | conserved hypothetical protein                                 |
| G2583_1916             | ECs2229   | Z2075     | -    | hypothetical protein                                           |
|                        | ECs2230   |           | -    | hypothetical protein                                           |
| Indel-99               | ECs2231   | Indel-99  | -    | putative tail fiber protein                                    |
| Indel-99               | ECs2232   | Indel-99  | -    | putative outer membrane protein                                |
| Indel-99               | ECs2233   | Indel-99  | -    | putative host specificity protein                              |
| Indel-99               | ECs2234   | Indel-99  | -    | putative host specificity protein                              |
| Indel-99               | ECs2235   | Indel-99  | -    | putative host specificity protein                              |
| Indel-99               | ECs2236   | Indel-99  | -    | putative tail assembly protein                                 |
| Indel-99               | ECs2237   | Indel-99  | -    | putative tail assembly protein                                 |
| Indel-100              | Indel-100 | Z6030     | -    | putative tail component of cryptic prophage CP-933P            |
| Indel-100              | Indel-100 | Z6031     | -    | putative tail assembly protein of cryptic prophage CP-933P     |
| Indel-100              | Indel-100 | Z6032     | -    | putative tail assembly protein of cryptic prophage CP-933P     |
| G2583_1917             | Indel-101 | Indel-101 | -    | putative tail fiber protein encoded by prophage CP-            |
| G2583_1918             | Indel-101 | Indel-101 | -    | Enterobacterial Ail/Lom family protein                         |
| G2583_1919             | Indel-101 | Indel-101 | -    | Host specificity protein J                                     |
| G2583_1920             | Indel-101 | Indel-101 | -    | Host specificity protein                                       |
| G2583_1921             | Indel-101 | Indel-101 | -    | Putative tail fiber component K of prophage                    |
| G2583_1922             | Indel-101 | Indel-101 | -    | minor tail protein                                             |
| G2583_1923             | Indel-101 | Indel-101 | -    | Minor tail family protein                                      |
| G2583_1924             | Indel-101 | Indel-101 | -    | putative tail component of prophage CP-933O                    |
| G2583_1925             | Indel-101 | Indel-101 | -    | hypothetical protein                                           |
| G2583_1926             | Indel-101 | Indel-101 | -    | phage minor tail protein G                                     |
| G2583_1927             | Indel-101 | Indel-101 | -    | COG5492: Bacterial surface proteins containing Ig-like domains |
| G2583_1928             | Indel-101 | Indel-101 | -    | hypothetical protein                                           |
| G2583_1929             | Indel-101 | Indel-101 | -    | hypothetical protein                                           |
| G2583_1930             | Indel-101 | Indel-101 | -    | hypothetical protein                                           |
| G2583_1931             | Indel-101 | Indel-101 | -    | conserved hypothetical protein                                 |
| G2583_1932             | Indel-101 | Indel-101 | -    | phage major capsid protein E                                   |
| G2583_1933             | Indel-101 | Indel-101 | -    | Bacteriophage lambda head decoration protein D                 |
| G2583_1934             | Indel-101 | Indel-101 | -    | COG0616: Periplasmic serine proteases (ClpP class)             |
| G2583_1935             | Indel-101 | Indel-101 | -    | COG5511: Bacteriophage capsid protein                          |
| G2583_1936             | Indel-101 | Indel-101 | -    | putative head completion protein                               |
| G2583_1937             | Indel-101 | Indel-101 | -    | Putative terminase large subunit of prophage CP-933O           |
| G2583_1938             | Indel-101 | Indel-101 | -    | Prophage Qin DNA packaging protein NU1 homolog                 |
| G2583_1939             | Indel-101 | Indel-101 | nohA | conserved hypothetical protein                                 |
| Indel-102              | ECs2238   | Z6033     | -    | minor tail protein                                             |

Table S10. The orthologue table of the O55 and O157 strains Page 74

| Locus_tag <sup>a</sup> |         |        | Gene  | Product                                                               |
|------------------------|---------|--------|-------|-----------------------------------------------------------------------|
| CB9615                 | Sakai   | EDL933 |       |                                                                       |
| Indel-102              | ECs2239 |        | -     | putative minor tail protein                                           |
| Indel-102              | ECs2240 | Z6034  | -     | putative tail length tape measure protein                             |
| Indel-102              | ECs2241 | Z6035  | -     | putative tail protein                                                 |
| Indel-102              | ECs2242 | Z6036  | -     | putative tail assembly chaperone                                      |
| Indel-102              | ECs2243 | Z6037  | -     | putative major tail subunit                                           |
| Indel-102              | ECs2244 | Z6038  | -     | hypothetical protein                                                  |
| Indel-102              | ECs2245 | Z6039  | -     | hypothetical protein                                                  |
| Indel-102              | ECs2246 | Z6040  | -     | putative head-tail adaptor                                            |
| Indel-102              | ECs2247 | Z6041  | -     | hypothetical protein                                                  |
| Indel-102              | ECs2248 | Z6042  | -     | putative portal protein                                               |
| Indel-102              |         | Z6043  | -     | unknown protein encoded by cryptic prophage CP-933P                   |
| Indel-102              | ECs2249 |        | -     | hypothetical protein                                                  |
| Indel-102              | ECs2250 | Z6044  | -     | putative major head protein/prohead protease                          |
| Indel-102              | ECs2251 | Z6045  | -     | putative terminase large subunit                                      |
| Indel-102              | ECs2252 | Z6046  | -     | putative terminase small subunit                                      |
| Indel-102              | ECs2253 |        | -     | hypothetical protein                                                  |
| Indel-102              | ECs2254 | Z6047  | -     | putative Dnase                                                        |
| Indel-102              | ECs2255 | Z6048  | -     | hypothetical protein                                                  |
| G2583_1940             |         |        | -     | conserved hypothetical protein                                        |
| G2583_1941             | ECs2257 | Z6049  | -     | Putative endopeptidase Rz                                             |
|                        | ECs2256 |        | -     | lipoprotein Rz1 precursor                                             |
| G2583_1942             | ECs2258 | Z6050  | antU  | Antirepressor protein                                                 |
| G2583_1943             | ECs2259 | Z6051  | -     | putative endolysin                                                    |
| G2583_1944             | ECs2260 | Z6052  | -     | unknown protein encoded by cryptic prophage CP-933P                   |
| G2583_1945             | ECs2261 | Z6053  | -     | Putative lysis protein S of prophage CP-933V                          |
| Indel-103              | ECs2262 | Z6054  | -     | hypothetical protein                                                  |
| Indel-103              | ECs2263 |        | -     | hypothetical protein                                                  |
| Indel-103              |         | Z6055  | -     | unknown protein encoded by cryptic prophage CP-933P                   |
| Indel-103              | ECs2264 |        | -     | hypothetical protein                                                  |
| Indel-103              | ECs2265 | Z6056  | -     | hypothetical protein                                                  |
| Indel-103              | ECs2266 |        | -     | hypothetical protein                                                  |
| Indel-103              | argO6   | RNA040 | argO6 | Arg tRNA                                                              |
| Indel-103              | argN4   | RNA041 | argN4 | Arg tRNA                                                              |
| Indel-103              | ileZ6   | RNA042 | ileZ6 | Ile tRNA                                                              |
| Indel-103              | ECs2267 | Z6060  | -     | putative antitermination protein                                      |
| Indel-103              | ECs2268 | Z6061  | -     | putative crossover junction endodeoxyribonuclease                     |
| Indel-103              | ECs2269 | Z6062  | -     | hypothetical protein                                                  |
| Indel-103              |         | Z6063  | mokP  | putative cell killing protein encoded within cryptic prophage CP-933P |
| Indel-103              | ECs2270 |        | -     | hypothetical protein                                                  |
| Indel-103              | ECs2271 | Z6064  | -     | hypothetical protein                                                  |
| Indel-103              | ECs2272 | Z6065  | -     | hypothetical protein                                                  |
| Indel-103              | ECs2273 | Z6066  | renP  | hypothetical protein                                                  |
| Indel-103              | ECs2274 | Z6067  | -     | hypothetical protein                                                  |

Table S10. The orthologue table of the O55 and O157 strains Page 75

| Locus_tag <sup>a</sup> |           |           | Gene   | Product                                                                |
|------------------------|-----------|-----------|--------|------------------------------------------------------------------------|
| CB9615                 | Sakai     | EDL933    |        |                                                                        |
| Indel-103              |           | Z6068     | -      | unknown protein encoded by cryptic prophage CP-933P                    |
| Indel-103              | ECs2275   | Z6069     | -      | putative DNA replication protein                                       |
| Indel-103              | ECs2276   | Z6070     | -      | putative replication protein                                           |
| Indel-103              | ECs2277   | Z6071     | -      | hypothetical protein                                                   |
| Indel-103              | ECs2278   | Z6072     | -      | hypothetical protein                                                   |
| Indel-103              | ECs2279   | Z6073     | -      | hypothetical protein                                                   |
| Indel-103              | ECs2280   | Z6074     | -      | hypothetical protein                                                   |
| Indel-103              | ECs2281   |           | -      | hypothetical protein                                                   |
| Indel-103              | ECs2282   |           | -      | hypothetical protein                                                   |
| Indel-103              | ECs2283   | Z6075     | -      | hypothetical protein                                                   |
| Indel-103              |           | Z6076     | -      | unknown protein encoded by cryptic prophage CP-933P                    |
| Indel-103              | dicF3     | RNA043    | dicF3  | DicF antisense RNA                                                     |
| Indel-103              | ECs2284   | Z6078     | -      | inhibitor of cell division                                             |
| Indel-103              | ECs2285   | Z6079     | -      | hypothetical protein                                                   |
| Indel-103              | ECs2286   | Z6080     | exoP   | hypothetical protein                                                   |
| Indel-103              | ECs2287   | Z6081     | xisP   | excisionase                                                            |
| Indel-103              |           | Z2566     | intP_1 | integrase fragment, cryptic prophage CP-933P                           |
|                        |           | Z2568     | intP_2 | integrase fragment, cryptic prophage CP-933P                           |
| G2583_1946             | Indel-104 | Indel-104 | -      | hypothetical protein                                                   |
| G2583_1947             | Indel-104 | Indel-104 | -      | hypothetical protein                                                   |
| G2583_1948             | Indel-104 | Indel-104 | -      | hypothetical protein                                                   |
| G2583_1949             | Indel-104 | Indel-104 | -      | hypothetical protein                                                   |
| G2583_1950             | Indel-104 | Indel-104 | -      | hypothetical protein                                                   |
| G2583_1951             | Indel-104 | Indel-104 | -      | DnaJ-class molecular chaperone with C-terminal Zn finger domain        |
| G2583_1952             | Indel-104 | Indel-104 | rusA   | Putative endonuclease of cryptic prophage CP-933M                      |
| G2583_1953             | Indel-104 | Indel-104 | ydfU   | conserved hypothetical protein                                         |
| G2583_1954             | Indel-104 | Indel-104 | -      | hypothetical protein                                                   |
| G2583_1955             | Indel-104 | Indel-104 | hokD   | Putative cell killing protein encoded within cryptic prophage CP-933M  |
| G2583_1956             | Indel-104 | Indel-104 | -      | Eaa protein                                                            |
| G2583_1957             | Indel-104 | Indel-104 | -      | unknown protein encoded within prophage CP-933R                        |
| G2583_1958             | Indel-104 | Indel-104 | -      | hypothetical protein                                                   |
| G2583_1959             | Indel-104 | Indel-104 | -      | unknown protein encoded within prophage CP-933R                        |
| G2583_1960             | Indel-104 | Indel-104 | -      | Putative bacteriophage protein                                         |
| G2583_1961             | Indel-104 | Indel-104 | -      | Unknown protein encoded within prophage                                |
| G2583_1962             | Indel-104 | Indel-104 | -      | conserved hypothetical protein                                         |
| G2583_1963             | Indel-104 | Indel-104 | -      | hypothetical protein                                                   |
| G2583_1964             | Indel-104 | Indel-104 | cro    | hypothetical protein                                                   |
| G2583_1965             | Indel-104 | Indel-104 | cII    | SOS-response transcriptional repressors (RecA-mediated autopeptidases) |
| G2583_1966             | Indel-104 | Indel-104 | ydaF   | unknown protein encoded by prophage CP-933N                            |
| G2583_1967             | Indel-104 | Indel-104 | -      | unknown protein encoded by prophage CP-933N                            |

Table S10. The orthologue table of the O55 and O157 strains Page 76

| Locus_tag <sup>a</sup> |           |           | Gene | Product                                                                     |
|------------------------|-----------|-----------|------|-----------------------------------------------------------------------------|
| CB9615                 | Sakai     | EDL933    |      |                                                                             |
| G2583_1968             | Indel-104 | Indel-104 | dicB | Putative regulator of cell division encoded by prophage CP-9330             |
| G2583_1969             | Indel-104 | Indel-104 | -    | conserved hypothetical protein                                              |
| G2583_1970             | Indel-104 | Indel-104 | ydfE | Exonuclease family protein                                                  |
| G2583_1971             | Indel-104 | Indel-104 | xisP | Putative phage excisionase protein                                          |
| G2583_1972             | Indel-104 | Indel-104 | intQ | Integrase family protein                                                    |
| G2583_1973             | Indel-104 | Indel-104 | YdfJ | Inner membrane metabolite transport protein ydfJ                            |
| G2583_1974             | Indel-104 | Indel-104 | rspB | Starvation sensing protein RspB                                             |
| G2583_1975             | Indel-104 | Indel-104 | rspA | Starvation-sensing protein rspA                                             |
| G2583_1976             | ECs2288   | Z2569     | ynfA | UPF0060 membrane protein ynfA                                               |
| G2583_1977             | ECs2289   | Z2570     | ynfB | UPF0482 protein ynfB precursor                                              |
| G2583_1978             | ECs2290   | Z2571     | speG | Spermidine N(1)-acetyltransferase                                           |
| G2583_1979             | ECs2291   | Z2572     | ynfC | hypothetical protein                                                        |
| G2583_1980             | ECs2292   | Z2573     | ynfD | hypothetical protein                                                        |
| G2583_1981             | ECs2293   | Z2575     | ynfE | Anaerobic dimethyl sulfoxide reductase, A subunit YnfE                      |
| G2583_1982             | ECs2294   | Z2576     | ynfF | Anaerobic dimethyl sulfoxide reductase, A subunit, DmsA/YnfE family         |
| G2583_1983             | ECs2295   | Z2577     | ynfG | Probable anaerobic dimethyl sulfoxide reductase chain ynfG                  |
| G2583_1984             | ECs2296   | Z2579     | ynfH | Oxidoreductase, membrane subunit                                            |
| G2583_1985             | ECs2297   | Z2581     | dmsD | Twin-arginine leader-binding protein dmsD                                   |
| G2583_1986             | ECs2298   | Z2583     | clcB | Putative chloride channel                                                   |
| G2583_1987             | ECs2299   | Z2585     | ynfK | Putative dethiobiotin synthetase                                            |
| G2583_1988             | ECs2300   | Z2587     | dgsA | putative NAGC-like transcriptional regulator                                |
| G2583_1989             | ECs2301   | Z2589     | ynfL | putative transcriptional regulator LYSR-type                                |
| G2583_1990             | ECs2302   | Z2590     | ynfM | Major facilitator family transporter                                        |
| G2583_1991             | ECs2303   | Z2591     | asr  | acid shock protein precursor                                                |
| G2583_1992             | ECs2304   | Z2592     | ydgD | V8-like Glu-specific endopeptidase                                          |
| G2583_1993             | ECs2305   | Z2593     | mdtI | multidrug resistance protein MdtI                                           |
| G2583_1994             | ECs2306   | Z2594     | mdtJ | Spermidine export protein mdtJ                                              |
| G2583_1995             | ECs2307   | Z2595     | tqsA | Putative permease, PerM family                                              |
| G2583_1996             | ECs2308   | Z2597     | pntB | NAD(P) transhydrogenase subunit beta                                        |
| G2583_1997             | ECs2309   | Z2600     | pntA | NAD(P) transhydrogenase, alpha subunit                                      |
| G2583_1998             | ECs2310   | Z2603     | ydgH | predicted protein                                                           |
| G2583_1999             | ECs2311   | Z2605     | ydgI | Arginine/ornithine antiporter                                               |
| G2583_2000             | ECs2312   | Z2606     | folM | Dihydrofolate reductase folM                                                |
| G2583_2001             | ECs2313   | Z2608     | ydgC | Inner membrane protein ydgC                                                 |
| G2583_2002             | ECs2314   | Z2609     | rstA | DNA-binding response regulator in two-component regulatory system with RstB |
| G2583_2003             | ECs2315   | Z2610     | rstB | Sensor histidine kinase RstB                                                |
| G2583_2004             | ECs2316   | Z2611     | tus  | DNA replication terminus site-binding protein                               |
| G2583_2005             | ECs2317   | Z2614     | fumC | Fumarate hydratase class II                                                 |
| G2583_2006             | ECs2318   | Z2615     | fumA | Fumarate hydratase class I, aerobic                                         |
| G2583_2007             | ECs2319   | Z2616     | manA | Mannose-6-phosphate isomerase, class I                                      |

Table S10. The orthologue table of the O55 and O157 strains Page 77

| Locus_tag <sup>a</sup> |         |        | Gene | Product                                                 |
|------------------------|---------|--------|------|---------------------------------------------------------|
| CB9615                 | Sakai   | EDL933 |      |                                                         |
| G2583_2008             | ECs2320 | Z2617  | ydgA | hypothetical protein                                    |
| G2583_2009             | ECs2321 | Z2618  | uidC | membrane-associated protein                             |
| G2583_2009             | ECs2322 | Z2619  | uidC | membrane-associated protein                             |
| G2583_2010             | ECs2323 | Z2620  | uidB | Glucuronide permease uidB                               |
| G2583_2011             | ECs2324 | Z2621  | uidA | Beta-glucuronidase                                      |
| G2583_2011             | ECs2325 | Z2622  | uidA | Beta-glucuronidase                                      |
| G2583_2012             | ECs2326 | Z2623  | uidR | repressor for uid operon                                |
| G2583_2013             | ECs2327 | Z2624  | hdhA | 7-alpha-hydroxysteroid dehydrogenase                    |
| G2583_2014             | ECs2328 | Z2625  | mall | Maltose regulon regulatory protein Mall                 |
| G2583_2015             | ECs2329 | Z2626  | malX | PTS system, maltose and glucose-specific IIBC component |
| G2583_2016             | ECs2330 | Z2627  | malY | Maltose regulon modulator MalY                          |
| G2583_2017             | ECs2331 | Z2628  | add  | Adenosine deaminase                                     |
| G2583_2018             | ECs2332 | Z2629  | ydgJ | Oxidoreductase, NAD-binding                             |
| G2583_2019             | ECs2333 |        | blr  | Beta-lactam resistance protein                          |
| G2583_2020             | ECs2334 | Z2631  | cnu  | OriC-binding nucleoid-associated protein                |
| G2583_2021             | ECs2335 | Z2632  | ydgK | hypothetical protein                                    |
| G2583_2022             | ECs2336 | Z2633  | rsxA | Electron transport complex protein rnfA                 |
| G2583_2023             | ECs2337 | Z2634  | rsxB | Electron transport complex protein rnfB                 |
| G2583_2024             | ECs2338 | Z2636  | rsxC | Electron transport complex protein RnfC                 |
| G2583_2025             | ECs2339 | Z2639  | rsxD | Electron transport complex protein rnfD                 |
| G2583_2026             | ECs2340 | Z2640  | rsxG | Electron transport complex protein rnfG                 |
| G2583_2027             | ECs2341 | Z2642  | rsxE | Predicted NADH:ubiquinone oxidoreductase, subu nit RnfE |
| G2583_2028             | ECs2342 | Z2644  | nth  | Endonuclease III                                        |
| G2583_2029             | ECs2343 | Z2646  | tppB | Tripeptide permease tppB                                |
| G2583_2030             | ECs2344 | Z2647  | gst  | Glutathione S-transferase                               |
| G2583_2031             | ECs2345 | Z2648  | pdxY | Pyridoxamine kinase                                     |
| G2583_2032             | ECs2346 | Z2650  | tyrS | Tyrosyl-tRNA synthetase                                 |
| G2583_2033             | ECs2347 | Z2652  | pdxH | Pyridoxine/pyridoxamine 5'-phosphate oxidase            |
| G2583_2034             | ECs2348 | Z2653  | ydhA | predicted lipoprotein                                   |
| G2583_2035             | ECs2349 | Z2654  | anmK | Anhydro-N-acetylmuramic acid kinase                     |
| G2583_2036             | ECs2350 | Z2655  | slyB | Outer membrane lipoprotein slyB precursor               |
| G2583_2037             | ECs2351 | Z2657  | slyA | Transcriptional regulators                              |
| G2583_2038             | ECs2352 | Z2658  | ydhI | hypothetical protein                                    |
| G2583_2039             | ECs2353 | Z2659  | ydhJ | hypothetical protein                                    |
| G2583_2040             | ECs2354 | Z2660  | ydhK | Uncharacterized transporter ydhK                        |
| G2583_2041             | ECs2355 | Z2661  | sodC | Superoxide dismutase [Cu-Zn]                            |
| G2583_2042             | ECs2356 | Z2664  | ydhF | Oxidoreductase ydhF                                     |
| G2583_2043             | ECs2358 | Z2665  | ydhL | hypothetical protein                                    |
| G2583_2044             | ECs2357 | Z2666  | ydhM | hypothetical protein                                    |
| G2583_2045             | ECs2359 | Z2668  | nemA | N-ethylmaleimide reductase                              |
| G2583_2046             | ECs2360 | Z2669  | gloA | Lactoylglutathione lyase                                |
| G2583_2047             | ECs2361 | Z2671  | rnt  | Ribonuclease T                                          |

Table S10. The orthologue table of the O55 and O157 strains Page 78

| Locus_tag <sup>a</sup> |         |        | Gene | Product                                                 |
|------------------------|---------|--------|------|---------------------------------------------------------|
| CB9615                 | Sakai   | EDL933 |      |                                                         |
| G2583_2048             | ECs2362 | Z2673  | lhr  | DEAD/DEAH box helicase family protein Lhr               |
| G2583_2049             | ECs2363 | Z2676  | grxD | Glutaredoxin-4                                          |
| G2583_2050             | ECs2364 | Z2677  | ydhO | NlpC/P60 family protein                                 |
| G2583_2051             | ECs2365 | Z2678  | sodB | Superoxide dismutase [Fe]                               |
| G2583_2052             | ECs2366 | Z2679  | ydhP | predicted transporter                                   |
| G2583_2053             | ECs2367 | Z2681  | purR | DNA-binding transcriptional repressor PurR              |
| G2583_2054             | ECs2368 | Z2682  | ydhB | putative DNA-binding transcriptional regulator          |
| G2583_2055             | ECs2369 | Z2685  | ydhC | Drug resistance transporter, Bcr/CflA subfamily         |
| G2583_2056             | ECs2370 | Z2686  | cfa  | Cyclopropane-fatty-acyl-phospholipid synthase           |
| G2583_2057             | ECs2371 | Z2688  | ribC | Riboflavin synthase alpha chain                         |
| G2583_2058             | ECs2372 | Z2690  | mdtK | Multidrug resistance protein mdtK                       |
| G2583_2059             | ECs2373 | Z2691  | ydhQ | hypothetical protein                                    |
| G2583_2060             | valV    | RNA044 | valV | Val tRNA                                                |
| G2583_2061             | valW    | RNA045 | valW | Val tRNA                                                |
| G2583_2062             | ECs2374 | Z2694  | ydhR | Protein ydhR                                            |
| G2583_2063             | ECs2375 | Z2695  | ydhS | hypothetical protein                                    |
| G2583_2064             | ECs2376 | Z2696  | ydhT | hypothetical protein                                    |
| G2583_2065             | ECs2377 | Z2697  | ydhU | Nickel-dependent hydrogenase, b-type cytochrome subunit |
| G2583_2066             | ECs2378 | Z2698  | ydhX | Uncharacterized ferredoxin-like protein ydhX            |
| G2583_2067             | ECs2379 | Z2700  | ydhW | hypothetical protein                                    |
| G2583_2068             | ECs2380 | Z2701  | ydhV | hypothetical protein                                    |
| G2583_2069             | ECs2381 | Z2702  | ydhY | Uncharacterized ferredoxin-like protein ydhY            |
| G2583_2070             | ECs2382 | Z2703  | ydhZ | hypothetical protein                                    |
| G2583_2071             | ECs2383 | Z2704  | pykF | Pyruvate kinase I                                       |
| G2583_2072             | ECs2384 | Z2705  | lpp  | Major outer membrane lipoprotein precursor              |
| G2583_2073             | ECs2385 | Z2706  | ynhG | LysM domain/ErkK/YbiS/YcfS/YnhG family protein          |
| G2583_2074             | ECs2386 | Z2707  | sufE | Cysteine desulfuration protein sufE                     |
| G2583_2075             | ECs2387 | Z2708  | sufS | Cysteine desulfurase                                    |
| G2583_2076             | ECs2388 | Z2709  | sufD | FeS assembly protein SufD                               |
| G2583_2077             | ECs2389 | Z2710  | sufC | FeS assembly ATPase SufC                                |
| G2583_2078             | ECs2390 | Z2711  | sufB | cysteine desulfurase activator complex subunit SufB     |
| G2583_2079             | ECs2391 | Z2712  | sufA | FeS assembly scaffold SufA                              |
| G2583_2080             |         |        | -    | ncRNA                                                   |
| G2583_2081             | ECs2392 | Z2713  | ydiH | hypothetical protein                                    |
| G2583_2082             | ECs2393 | Z2714  | ydiI | Esterase YdiI                                           |
| G2583_2083             | ECs2394 | Z2715  | ydiJ | Oxidoreductase, FAD-binding                             |
| G2583_2084             | ECs2395 | Z2716  | ydiK | Inner membrane protein YdiK                             |
| G2583_2085             |         |        | rprA | ncRNA                                                   |
| G2583_2086             | ECs2396 | Z2717  | ydiL | hypothetical protein                                    |
| G2583_2087             | ECs2397 | Z2718  | ydiM | Major facilitator family transporter                    |
| G2583_2088             | ECs2398 | Z2719  | ydiN | Transporter, major facilitator family                   |
| G2583_2089             | ECs2399 | Z2720  | ydiB | Quinate/shikimate dehydrogenase                         |
| G2583_2090             | ECs2400 | Z2721  | aroD | 3-dehydroquinate dehydratase                            |

Table S10. The orthologue table of the O55 and O157 strains Page 79

| Locus_tag <sup>a</sup> |           |           | Gene | Product                                                    |
|------------------------|-----------|-----------|------|------------------------------------------------------------|
| CB9615                 | Sakai     | EDL933    |      |                                                            |
| G2583_2091             | ECs2401   | Z2722     | ydiF | Propionate CoA-transferase                                 |
| G2583_2092             | ECs2402   | Z2723     | ydiO | Acyl-coA dehydrogenase                                     |
| G2583_2093             | ECs2403   | Z2724     | ydiP | putative ARAC-type regulatory protein                      |
| G2583_2094             | ECs2404   | Z2726     | ydiQ | camphor resistance protein CrcB                            |
| G2583_2095             | ECs2405   | Z2727     | ydiR | iron donor protein CyaY                                    |
| G2583_2096             | ECs2406   | Z2728     | ydiS | putative sulfate transport protein CysZ                    |
| G2583_2097             | ECs2407   | Z2729     | ydiT | Iron-sulfur cluster-binding protein                        |
| G2583_2098             | ECs2408   | Z2730     | fadK | Putative ligase/synthetase                                 |
| G2583_2099             | ECs2409   | Z2731     | pps  | Phosphoenolpyruvate synthase                               |
| G2583_2100             | ECs2410   | Z2732     | ydiA | Putative phosphotransferase ydiA                           |
| G2583_2101             | ECs2411   | Z2733     | aroH | Phospho-2-dehydro-3-deoxyheptonate aldolase, Trp-sensitive |
| G2583_2102             | ECs2412   | Z2734     | ydiE | hypothetical protein                                       |
| G2583_2103             | ECs2413   | Z2735     | ydiU | UPF0061 protein ydiU                                       |
| G2583_2104             | ECs2414   | Z2736     | ydiV | hypothetical protein                                       |
| G2583_2105             | ECs2415   | Z2737     | nlpC | Lipoprotein, NlpC/P60 family                               |
| G2583_2106             | ECs2416   | Z2738     | btuD | Vitamin B12 import ATP-binding protein btuD                |
| G2583_2107             | ECs2417   | Z2739     | btuE | Vitamin B12 transport periplasmic protein btuE             |
| G2583_2108             | ECs2418   | Z2740     | btuC | Vitamin B12 import system permease protein btuC            |
| G2583_2109             | Indel-106 | Indel-106 | -    | hypothetical protein                                       |
| G2583_2110             | Indel-106 | Indel-106 | intT | integrase                                                  |
| G2583_2111             | Indel-106 | Indel-106 | cl   | gpC                                                        |
| G2583_2112             | Indel-106 | Indel-106 | -    | hypothetical phage DNA-binding protein                     |
| G2583_2113             | Indel-106 | Indel-106 | -    | unknown protein encoded by prophage CP-933T                |
| G2583_2114             | Indel-106 | Indel-106 | -    | hypothetical protein                                       |
| G2583_2115             | Indel-106 | Indel-106 | -    | hypothetical protein                                       |
| G2583_2116             | Indel-106 | Indel-106 | -    | hypothetical protein                                       |
| G2583_2117             | Indel-106 | Indel-106 | -    | hypothetical protein                                       |
| G2583_2118             | Indel-106 | Indel-106 | -    | hypothetical protein                                       |
| G2583_2119             | Indel-106 | Indel-106 | -    | conserved hypothetical protein                             |
| G2583_2120             | Indel-106 | Indel-106 | -    | hypothetical protein                                       |
| G2583_2121             | Indel-106 | Indel-106 | -    | hypothetical protein                                       |
| G2583_2122             | Indel-106 | Indel-106 | -    | putative phage replication protein                         |
| G2583_2123             | Indel-106 | Indel-106 | -    | Molecular chaperone                                        |
| G2583_2124             | Indel-106 | Indel-106 | -    | hypothetical protein                                       |
| G2583_2125             | Indel-106 | Indel-106 | clpX | ATP-dependent protease Clp, ATPase subunit                 |
| G2583_2126             | Indel-106 | Indel-106 | -    | hypothetical protein                                       |
| G2583_2127             | Indel-106 | Indel-106 | gpq  | Putative phage protein                                     |
| G2583_2128             | Indel-106 | Indel-106 | gpP  | Putative phage protein gpP                                 |
| G2583_2129             | Indel-106 | Indel-106 | -    | putative capsid scaffolding protein                        |
| G2583_2130             | Indel-106 | Indel-106 | gpn  | Predicted major capsid protein                             |
| G2583_2131             | Indel-106 | Indel-106 | gpm  | Putative phage terminase                                   |
| G2583_2132             | Indel-106 | Indel-106 | gpl  | phage head completion protein                              |
| G2583_2133             | Indel-106 | Indel-106 | -    | Probable phage tail protein                                |

Table S10. The orthologue table of the O55 and O157 strains Page 80

| Locus_tag <sup>a</sup> |           |           | Gene | Product                                                                                |
|------------------------|-----------|-----------|------|----------------------------------------------------------------------------------------|
| CB9615                 | Sakai     | EDL933    |      |                                                                                        |
| G2583_2134             | Indel-106 | Indel-106 | -    | Phosphotransferase system IIC components, glucose/maltose/N-acetylglucosamine-specific |
| G2583_2135             | Indel-106 | Indel-106 | -    | Phage capsid scaffolding protein                                                       |
| G2583_2136             | Indel-106 | Indel-106 | -    | hypothetical protein                                                                   |
| G2583_2137             | Indel-106 | Indel-106 | -    | Predicted tail completion phage protein                                                |
| G2583_2138             | Indel-106 | Indel-106 | gps  | Predicted tail completion phage protein                                                |
| G2583_2139             | Indel-106 | Indel-106 | -    | Phage P2 baseplate assembly protein gpV                                                |
| G2583_2140             | Indel-106 | Indel-106 | -    | Phage baseplate assembly protein                                                       |
| G2583_2141             | Indel-106 | Indel-106 | -    | probable phage baseplate assembly protein                                              |
| G2583_2142             | Indel-106 | Indel-106 | gpl  | phage tail protein I                                                                   |
| G2583_2143             | Indel-106 | Indel-106 | -    | DNA inversion product                                                                  |
| G2583_2144             | Indel-106 | Indel-106 | -    | Alternative bacteriophage tail fiber C-terminus                                        |
| G2583_2145             | Indel-106 | Indel-106 | tfaE | Tail fiber assembly protein homolog                                                    |
| G2583_2146             | Indel-106 | Indel-106 | -    | Sc/SvM1 protein                                                                        |
| G2583_2147             | Indel-106 | Indel-106 | ycfK | putative tail fiber protein                                                            |
| G2583_2148             | Indel-106 | Indel-106 | pin  | DNA-invertase                                                                          |
| G2583_2149             | Indel-106 | Indel-106 | -    | Phage protein U                                                                        |
| G2583_2150             | Indel-106 | Indel-106 | -    | Phage-related tail protein                                                             |
| G2583_2151             | Indel-106 | Indel-106 | -    | Putative phage tail protein                                                            |
| G2583_2152             | Indel-106 | Indel-106 | -    | ABC-type antimicrobial peptide transport system, ATPase component                      |
| G2583_2153             | Indel-106 | Indel-106 | -    | Putative tail fiber component of prophage CP-933T                                      |
| G2583_2154             | Indel-106 | Indel-106 | -    | Phage tail sheath protein FI                                                           |
| G2583_2155             | Indel-106 | Indel-106 | gpd  | Phage protein D                                                                        |
| G2583_2156             | Indel-106 | Indel-106 | -    | hypothetical protein                                                                   |
| G2583_2157             | Indel-106 | Indel-106 | -    | putative phage transcriptional activator, Ogr/Delta                                    |
| G2583_2158             | Indel-106 | Indel-106 | -    | conserved hypothetical protein                                                         |
| G2583_2159             | ECs2419   | Z2741     | ihfA | Integration host factor subunit alpha                                                  |
| G2583_2160             | ECs2420   | Z2742     | pheT | Phenylalanyl-tRNA synthetase beta chain                                                |
| G2583_2161             | ECs2421   | Z2743     | pheS | Phenylalanyl-tRNA synthetase alpha chain                                               |
| G2583_2162             | ECs2422   | Z2744     | pheM | phenylalanyl-tRNA synthetase (pheST) operon leader peptide                             |
| G2583_2163             | ECs2423   | Z2745     | rpIT | 50S ribosomal protein L20                                                              |
| G2583_2164             | ECs2424   | Z2746     | rpml | 50S ribosomal protein L35                                                              |
| G2583_2165             | ECs2425   | Z2747     | infC | Translation initiation factor IF-3                                                     |
| G2583_2166             | ECs2426   | Z2748     | thrS | Threonyl-tRNA synthetase                                                               |
| G2583_2167             | ECs2427   | Z2749     | arpA | Ankyrin repeat protein B                                                               |
| G2583_2168             | ECs2428   | Z2751     | ydiY | hypothetical protein                                                                   |
| G2583_2169             | ECs2429   | Z2752     | pfkB | 6-phosphofructokinase II                                                               |
| G2583_2170             | ECs2430   | Z2753     | ydiZ | hypothetical protein                                                                   |
| G2583_2171             | ECs2431   | Z2754     | yniA | hypothetical protein                                                                   |
| G2583_2172             | ECs2432   | Z2755     | yniB | hypothetical protein                                                                   |
| G2583_2173             | ECs2433   | Z2756     | yniC | Phosphatase yniC                                                                       |
| G2583_2174             | ECs2434   | Z2757     | ydjM | Inner membrane protein ydjM precursor                                                  |



Table S10. The orthologue table of the O55 and O157 strains Page 81

| Locus_tag <sup>a</sup> |         |        | Gene | Product                                                                  |
|------------------------|---------|--------|------|--------------------------------------------------------------------------|
| CB9615                 | Sakai   | EDL933 |      |                                                                          |
| G2583_2175             | ECs2435 | Z2758  | ydjN | Sodium:dicarboxylate symporter precursor                                 |
| G2583_2176             | ECs2436 | Z2759  | ydjO | hypothetical protein                                                     |
| G2583_2177             | ECs2437 | Z2760  | cedA | Cell division activator cedA                                             |
| G2583_2178             | ECs2438 | Z2761  | katE | Catalase HP11                                                            |
| G2583_2179             | ECs2439 | Z2763  | chbG | UPF0249 protein chbG                                                     |
| G2583_2180             | ECs2440 | Z2764  | chbF | Phospho-beta-glucosidase                                                 |
| G2583_2181             | ECs2441 | Z2765  | chbR | ChbR                                                                     |
| G2583_2182             | ECs2442 | Z2766  | chbA | N,N'-diacetylchitobiose-specific phosphotransferase enzyme IIA component |
| G2583_2183             | ECs2443 | Z2767  | chbC | N,N'-diacetylchitobiose permease IIC component                           |
| G2583_2184             | ECs2444 | Z2768  | chbB | PTS system, lactose/cellobiose family IIB subunit precursor              |
| G2583_2185             | ECs2445 | Z2769  | osmE | Osmotically-inducible lipoprotein E precursor                            |
| G2583_2186             | ECs2446 | Z2770  | nadE | NAD synthase                                                             |
| G2583_2187             | ECs2447 | Z2771  | cho  | Excinuclease cho                                                         |
| G2583_2188             | ECs2448 | Z2774  | ves  | Uncharacterized protein conserved in bacteria                            |
| G2583_2189             | ECs2449 | Z2775  | spy  | Spy                                                                      |
| G2583_2190             | ECs2450 | Z2776  | astE | Succinylglutamate desuccinylase                                          |
| G2583_2191             | ECs2451 | Z2777  | astB | N-succinylarginine dihydrolase                                           |
| G2583_2192             | ECs2452 | Z2778  | astD | N-succinylglutamate 5-semialdehyde dehydrogenase                         |
| G2583_2193             | ECs2453 | Z2779  | astA | Arginine N-succinyltransferase                                           |
| G2583_2194             | ECs2454 | Z2780  | astC | Succinylornithine transaminase                                           |
| G2583_2195             | ECs2455 | Z2781  | xthA | Exodeoxyribonuclease III                                                 |
| G2583_2196             | ECs2456 | Z2782  | ydjX | hypothetical protein                                                     |
| G2583_2197             | ECs2457 | Z2783  | ydjY | hypothetical protein                                                     |
| G2583_2198             | ECs2458 | Z2784  | ydjZ | hypothetical protein                                                     |
| G2583_2199             | ECs2459 | Z2785  | ynjA | Carboxymuconolactone decarboxylase family protein                        |
| G2583_2200             | ECs2460 | Z2786  | ynjB | hypothetical protein                                                     |
| G2583_2201             | ECs2461 | Z2787  | ynjC | ABC transporter, permease protein                                        |
| G2583_2202             | ECs2462 | Z2788  | ynjD | Putative ATP-binding component of a transport system                     |
| G2583_2203             | ECs2463 | Z2789  | ynjE | Putative thiosulfate sulfurtransferase YnjE                              |
| G2583_2204             | ECs2464 | Z2790  | ynjF | Putative cytochrome oxidase                                              |
| G2583_2205             | ECs2465 | Z2791  | nudG | CTP pyrophosphohydrolase                                                 |
| G2583_2206             | ECs2466 | Z2792  | ynjH | hypothetical protein                                                     |
| G2583_2207             | ECs2467 | Z2793  | gdhA | NADP-specific glutamate dehydrogenase                                    |
| G2583_2208             | ECs2468 | Z2795  | ynjI | hypothetical protein                                                     |
| G2583_2209             | ECs2469 | Z2796  | topB | DNA topoisomerase III                                                    |
| G2583_2210             | ECs2470 | Z2797  | selD | Selenide, water dikinase                                                 |
| G2583_2211             | ECs2471 | Z2798  | ydjA | Protein ydjA                                                             |
| G2583_2212             | ECs2472 | Z2799  | sppA | Protease 4                                                               |
| G2583_2213             | ECs2473 | Z2800  | -    | hypothetical protein                                                     |
| G2583_2214             | ECs2474 | Z2801  | ansA | L-asparaginase 1                                                         |
| G2583_2215             | ECs2475 | Z2802  | pncA | hypothetical protein                                                     |
| G2583_2216             | ECs2476 | Z2803  | ydjE | Inner membrane metabolite transport protein ydjE                         |

Table S10. The orthologue table of the O55 and O157 strains Page 82

| Locus_tag <sup>a</sup> |         |        | Gene | Product                                                          |
|------------------------|---------|--------|------|------------------------------------------------------------------|
| CB9615                 | Sakai   | EDL933 |      |                                                                  |
| Indel-107              | ECs2477 | Z2804  | -    | putative transposase OrfA protein of insertion sequence IS629    |
| Indel-107              | ECs2478 | Z2806  | -    | putative transposase OrfB protein of insertion sequence IS629    |
| G2583_2217             | ECs2479 | Z2808  | ydjF | transcriptional regulator, DeoR family                           |
| G2583_2218             | ECs2480 | Z2809  | ydjG | Oxidoreductase, aldo/keto reductase family                       |
| G2583_2219             | ECs2481 | Z2810  | ydjH | Kinase, pfkB family                                              |
| G2583_2220             | ECs2482 | Z2811  | ydjI | Fructose-bisphosphate aldolase, class II family                  |
| G2583_2221             | ECs2483 | Z2812  | ydjJ | Sorbitol dehydrogenase                                           |
| G2583_2222             | ECs2484 | Z2813  | ydjK | major facilitator family transporter                             |
| G2583_2223             | ECs2485 | Z2815  | ydjL | Oxidoreductase, zinc-binding dehydrogenase family                |
| G2583_2224             | ECs2486 | Z2816  | yeaC | hypothetical protein                                             |
| G2583_2225             | ECs2487 | Z2817  | msrB | Methionine sulfoxide reductase B                                 |
| G2583_2226             | ECs2488 | Z2818  | gapA | Glyceraldehyde-3-phosphate dehydrogenase A                       |
| G2583_2227             | ECs2489 | Z2820  | yeaD | Aldose 1-epimerase family protein                                |
| G2583_2228             | ECs2490 | Z2821  | yeaE | Oxidoreductase, aldo/keto reductase family                       |
| G2583_2229             | ECs2491 | Z2822  | mipA | MltA-interacting protein precursor                               |
| G2583_2230             | ECs2492 | Z2823  | yeaG | hypothetical protein                                             |
| G2583_2231             | ECs2493 | Z2824  | yeaH | UPF0229 protein yeaH                                             |
| G2583_2232             | ECs2494 | Z2825  | yeaI | Diguanylate cyclase (GGDEF) domain protein                       |
| G2583_2233             | ECs2495 | Z2826  | yeaJ | hypothetical protein                                             |
| G2583_2234             | ECs2496 | Z2827  | yeaK | hypothetical protein                                             |
| G2583_2235             | ECs2497 | Z2828  | -    | hypothetical protein                                             |
| G2583_2236             | ECs2498 | Z2829  | yeaL | Predicted membrane protein                                       |
| G2583_2237             | ECs2499 | Z2831  | yeaM | Putative AraC-type regulatory protein                            |
| G2583_2238             | ECs2500 | Z2833  | yeaN | inner membrane transport protein yeaN                            |
| G2583_2239             | ECs2501 | Z2834  | yeaO | hypothetical protein                                             |
| G2583_2240             | ECs2502 | Z2835  | yoaF | hypothetical protein                                             |
| G2583_2241             | ECs2503 | Z2836  | yeaP | GAF domain/diguanylate cyclase (GGDEF) domain protein            |
| G2583_2242             | ECs2504 | Z2837  | yeaQ | hypothetical protein                                             |
| G2583_2243             | ECs2505 | Z2838  | yoaG | Protein yoaG                                                     |
| G2583_2244             | ECs2506 | Z2839  | yeaR | hypothetical protein                                             |
| G2583_2245             | ECs2507 | Z2841  | leuE | Leucine efflux protein                                           |
| G2583_2246             | ECs2508 | Z2842  | yeaT | putative transcriptional regulator LYSR-type                     |
| G2583_2247             | ECs2509 | Z2843  | yeaU | Tartrate dehydrogenase/decarboxylase                             |
| G2583_2248             | ECs2510 | Z2844  | yeaV | Transporter, betaine/carnitine/choline transporter (BCCT) family |
| G2583_2249             | ECs2511 | Z2845  | yeaW | Putative dioxygenase subunit alpha yeaW                          |
| G2583_2250             | ECs2512 | Z2846  | yeaX | Putative diogenase beta subunit                                  |
| G2583_2251             | ECs2513 | Z2847  | rnd  | Ribonuclease D                                                   |
| G2583_2252             |         |        | -    | ncRNA                                                            |
| G2583_2253             | ECs2514 | Z2848  | fadD | Long-chain-fatty-acid--CoA ligase                                |
| G2583_2254             | ECs2515 | Z2849  | yeaY | Outer membrane protein Slp                                       |

Table S10. The orthologue table of the O55 and O157 strains Page 83

| Locus_tag <sup>a</sup> |         |        | Gene | Product                                                                     |
|------------------------|---------|--------|------|-----------------------------------------------------------------------------|
| CB9615                 | Sakai   | EDL933 |      |                                                                             |
| G2583_2255             | ECs2516 | Z2850  | yeaZ | Glycoprotease family protein                                                |
| G2583_2256             | ECs2517 | Z2851  | yoaA | Helicase c2                                                                 |
| G2583_2257             | ECs2518 | Z2852  | yoaB | hypothetical protein                                                        |
| G2583_2258             | ECs2519 | Z2853  | yoaC | hypothetical protein                                                        |
| G2583_2259             | ECs2520 | Z2854  | yoaH | UPF0181 protein yoaH                                                        |
| G2583_2260             | ECs2521 | Z2855  | pabB | p-aminobenzoate synthetase, component I                                     |
| G2583_2261             | ECs2522 | Z2856  | nudL | Uncharacterized Nudix hydrolase nudL                                        |
| G2583_2262             | ECs2523 | Z2857  | sdaA | L-serine ammonia-lyase 1                                                    |
| G2583_2263             | ECs2524 | Z2858  | yoaD | hypothetical protein                                                        |
| G2583_2264             | ECs2525 | Z2859  | yoaE | UPF0053 inner membrane protein yoaE                                         |
| G2583_2265             | ECs2526 |        | -    | putative cytoplasmic protein                                                |
| G2583_2266             | ECs2527 | Z2860  | manX | Putative PTS system, mannose-specific component                             |
| G2583_2267             | ECs2528 | Z2861  | manY | PTS enzyme IIC, mannose-specific                                            |
| G2583_2268             | ECs2529 | Z2862  | manZ | Mannose permease IID component                                              |
| G2583_2269             | ECs2530 | Z2863  | yobD | UPF0266 membrane protein yobD                                               |
| G2583_2270             | ECs2531 | Z2864  | yebN | hypothetical protein                                                        |
| G2583_2271             | ECs2532 | Z2866  | rrmA | 23S rRNA methyltransferase A                                                |
| G2583_2272             | ECs2533 | Z2868  | cspC | hypothetical protein                                                        |
| G2583_2273             | ECs2534 | Z2869  | yobF | hypothetical protein                                                        |
| G2583_2274             | ECs2535 | Z2871  | yebO | hypothetical protein                                                        |
| G2583_2275             | ECs2536 | Z2872  | mgrB | hypothetical protein                                                        |
| G2583_2276             |         | Z2873  | yobH | hypothetical protein                                                        |
| G2583_2277             | ECs2537 | Z2874  | kdgR | putative regulator                                                          |
| G2583_2278             | ECs2538 | Z2875  | yebQ | Putative transport protein                                                  |
| G2583_2279             | ECs2539 | Z2876  | htpX | Probable protease htpX                                                      |
| G2583_2280             | ECs2540 | Z2877  | prc  | C-terminal processing peptidase                                             |
| G2583_2281             | ECs2541 | Z2878  | proQ | ProP effector                                                               |
| G2583_2282             | ECs2542 | Z2879  | yebR | GAF domain protein                                                          |
| G2583_2283             | ECs2543 | Z2880  | yebS | hypothetical protein                                                        |
| G2583_2284             | ECs2544 | Z2881  | yebT | Mce-related protein                                                         |
| G2583_2285             | ECs2545 | Z2882  | rsmF | Ribosomal RNA small subunit methyltransferase F                             |
| G2583_2286             | ECs2546 | Z2883  | yebV | hypothetical protein                                                        |
| G2583_2287             | ECs2547 | Z2884  | yebW | hypothetical protein                                                        |
| G2583_2288             | ECs2548 | Z2885  | pphA | Protein phosphatase 1 modulates phosphoproteins, signals protein misfolding |
| G2583_2289             |         |        | -    | ncRNA                                                                       |
| G2583_2290             |         |        | -    | ncRNA                                                                       |
| G2583_2291             | ECs2549 | Z2887  | yebY | hypothetical protein                                                        |
| G2583_2292             | ECs2550 | Z2888  | yebZ | Copper resistance protein D                                                 |
| G2583_2293             | ECs2551 | Z2889  | yobA | Copper resistance protein CopC                                              |
| G2583_2294             | ECs2552 | Z2891  | holE | DNA polymerase III subunit theta                                            |
| G2583_2295             | ECs2553 | Z2893  | yobB | Hydrolase, carbon-nitrogen family                                           |
| G2583_2296             | ECs2554 | Z2894  | exoX | Exodeoxyribonuclease 10                                                     |
| G2583_2297             | ECs2555 | Z2896  | ptrB | Oligopeptidase B                                                            |

Table S10. The orthologue table of the O55 and O157 strains Page 84

| Locus_tag <sup>a</sup> |         |        | Gene | Product                                                         |
|------------------------|---------|--------|------|-----------------------------------------------------------------|
| CB9615                 | Sakai   | EDL933 |      |                                                                 |
| G2583_2298             | ECs2556 | Z2897  | yebE | hypothetical protein                                            |
| G2583_2299             | ECs2557 | Z2899  | yebF | hypothetical protein                                            |
| G2583_2300             | ECs2558 | Z2900  | yebG | hypothetical protein                                            |
| G2583_2301             | ECs2559 | Z2901  | purT | Phosphoribosylglycinamide formyltransferase 2                   |
| G2583_2302             | ECs2560 | Z2902  | eda  | KDPG and KHG aldolase                                           |
| G2583_2303             | ECs2561 | Z2903  | edd  | Phosphogluconate dehydratase                                    |
| G2583_2304             | ECs2562 | Z2904  | zwf  | Glucose-6-phosphate 1-dehydrogenase                             |
| G2583_2305             | ECs2563 | Z2905  | yebK | DNA-binding transcriptional regulator HexR                      |
| G2583_2306             | ECs2564 | Z2906  | pykA | Pyruvate kinase II                                              |
| G2583_2307             | ECs2565 | Z2907  | lpxM | Lipid A biosynthesis (KDO)2-(Lauroyl)-lipid IVA acyltransferase |
| G2583_2308             | ECs2566 | Z2908  | yebA | Uncharacterized metalloprotease yebA                            |
| G2583_2309             | ECs2567 | Z2909  | znuA | Putative adhesin                                                |
| G2583_2310             | ECs2568 | Z2910  | znuC | Zinc import ATP-binding protein znuC                            |
| G2583_2311             | ECs2569 | Z2911  | znuB | Zinc uptake ABC transporter, permease protein ZnuB              |
| G2583_2312             | ECs2570 | Z2912  | ruvB | Holliday junction ATP-dependent DNA helicase ruvB               |
| G2583_2313             | ECs2571 | Z2913  | ruvA | Holliday junction ATP-dependent DNA helicase ruvA               |
| G2583_2314             | ECs2572 | Z2914  | yebB | hypothetical protein                                            |
| G2583_2315             | ECs2573 | Z2915  | ruvC | Crossover junction endodeoxyribonuclease ruvC                   |
| G2583_2316             | ECs2574 | Z2916  | yebC | UPF0082 protein yebC                                            |
| G2583_2317             | ECs2575 | Z2917  | nudB | dATP pyrophosphohydrolase                                       |
| G2583_2318             | ECs2576 | Z2919  | aspS | Aspartyl-tRNA synthetase                                        |
| G2583_2319             | ECs2577 | Z2920  | yecD | hypothetical protein                                            |
| G2583_2320             | ECs2578 | Z2921  | yecE | hypothetical protein                                            |
| G2583_2321             | ECs2579 | Z2922  | yecN | hypothetical protein                                            |
| G2583_2322             | ECs2580 | Z2923  | cmoA | tRNA (cmo5U34)-methyltransferase                                |
| G2583_2323             | ECs2581 | Z2924  | cmoB | tRNA (mo5U34)-methyltransferase                                 |
| G2583_2324             | ECs2582 | Z2925  | torZ | Trimethylamine N-oxide reductase III, subunit TorZ              |
| G2583_2325             | ECs2583 | Z2926  | torY | Cytochrome c-type protein torY                                  |
| G2583_2326             | ECs2584 | Z2927  | cutC | Copper homeostasis protein cutC                                 |
| G2583_2327             | ECs2585 | Z2928  | yecM | hypothetical protein                                            |
| G2583_2328             | ECs2586 | Z2929  | argS | Arginyl-tRNA synthetase                                         |
| G2583_2329             | ECs2587 | Z2930  | yecT | hypothetical protein                                            |
| G2583_2330             | ECs2588 | Z2931  | flhE | hypothetical protein                                            |
| G2583_2331             | ECs2589 | Z2932  | flhA | Flagellar biosynthesis protein flhA                             |
| G2583_2332             | ECs2590 | Z2934  | flhB | Flagellar biosynthetic protein FlhB                             |
| G2583_2333             | ECs2591 | Z2935  | cheZ | Chemotaxis phosphatase CheZ                                     |
| G2583_2334             | ECs2592 | Z2936  | cheY | Chemotaxis protein cheY                                         |
| G2583_2335             | ECs2593 | Z2937  | cheB | Chemotaxis response regulator protein-glutamate methylesterase  |
| G2583_2336             | ECs2594 | Z2938  | cheR | Chemotaxis protein methyltransferase CheR                       |
| G2583_2337             | ECs2595 | Z2939  | tap  | Methyl-accepting chemotaxis protein IV                          |
| G2583_2338             | ECs2596 | Z2940  | tar  | Methyl-accepting chemotaxis protein II                          |
| G2583_2339             |         |        | -    | ncRNA                                                           |

Table S10. The orthologue table of the O55 and O157 strains Page 85

| Locus_tag <sup>a</sup> |         |        | Gene | Product                                                                    |
|------------------------|---------|--------|------|----------------------------------------------------------------------------|
| CB9615                 | Sakai   | EDL933 |      |                                                                            |
| G2583_2340             | ECs2597 | Z2941  | cheW | Chemotaxis protein cheW                                                    |
| G2583_2341             | ECs2598 | Z2942  | cheA | Sensory transducer kinase between chemo-signal receptors and CheB and CheY |
| G2583_2342             | ECs2599 | Z2943  | motB | Chemotaxis protein motB                                                    |
| G2583_2343             | ECs2600 | Z2944  | motA | Chemotaxis protein MotA                                                    |
| G2583_2344             | ECs2601 | Z2945  | flhC | Flagellar transcriptional activator flhC                                   |
| G2583_2345             | ECs2602 | Z2946  | flhD | Transcriptional activator                                                  |
|                        |         | Z2947  | -    | hypothetical protein                                                       |
| G2583_2346             | ECs2603 | Z2948  | uspC | Universal stress protein C                                                 |
| G2583_2347             | ECs2604 | Z2949  | otsA | Alpha,alpha-trehalose-phosphate synthase [UDP-                             |
| G2583_2348             | ECs2605 | Z2950  | otsB | Trehalose-phosphatase                                                      |
| G2583_2349             | ECs2606 | Z2951  | araH | ABC-type arabinose transport system, permease component                    |
| G2583_2349             | ECs2607 | Z2952  | araH | ABC-type arabinose transport system, permease component                    |
| G2583_2350             | ECs2608 | Z2953  | araG | Arabinose import ATP-binding protein araG                                  |
| G2583_2351             | ECs2609 | Z2954  | araF | L-arabinose-binding periplasmic protein                                    |
| G2583_2352             | ECs2610 | Z2956  | ftnB | Ferritin-like protein 2                                                    |
| G2583_2353             |         |        | yecJ | hypothetical protein                                                       |
| G2583_2354             | ECs2611 | Z2958  | -    | hypothetical protein                                                       |
| G2583_2355             | ECs2612 | Z2959  | yecR | hypothetical protein                                                       |
| G2583_2356             | ECs2613 | Z2960  | ftnA | Ferritin-1                                                                 |
| G2583_2357             | ECs2614 | Z2962  | yecH | hypothetical protein                                                       |
| G2583_2358             | ECs2615 | Z2963  | tyrP | Tyrosine-specific transport protein                                        |
| G2583_2359             | ECs2616 | Z2964  | yecA | SEC-C domain protein                                                       |
| Indel-109              | ECs2617 | Z2966  | intT | putative integrase                                                         |
| Indel-109              | ECs2618 | Z2967  | -    | hypothetical protein                                                       |
| Indel-109              | ECs2619 | Z2968  | -    | putative membrane protein                                                  |
| Indel-109              | ECs2620 | Z2969  | -    | putative transcriptional regulator                                         |
| Indel-109              | ECs2621 |        | -    | hypothetical protein                                                       |
| Indel-109              | ECs2622 | Z2970  | coxT | putative DNA-binding protein                                               |
| Indel-109              | ECs2623 | Z2971  | -    | hypothetical protein                                                       |
| Indel-109              | ECs2624 | Z2972  | -    | hypothetical protein                                                       |
| Indel-109              | ECs2625 | Z2973  | -    | hypothetical protein                                                       |
| Indel-109              | ECs2626 | Z2974  | -    | hypothetical protein                                                       |
| Indel-109              | ECs2627 |        | -    | hypothetical protein                                                       |
| Indel-109              | ECs2628 |        | -    | hypothetical protein                                                       |
| Indel-109              | ECs2629 | Z2975  | -    | hypothetical protein                                                       |
| Indel-109              | ECs2630 |        | -    | hypothetical protein                                                       |
| Indel-109              | ECs2631 | Z2976  | -    | putative derepression protein                                              |
| Indel-109              | ECs2632 | Z2977  | -    | hypothetical protein                                                       |
| Indel-109              | ECs2633 | Z2978  | -    | putative phage replication protein                                         |
| Indel-109              | ECs2634 | Z2979  | -    | putative plasmid partition protein                                         |
| Indel-109              | ECs2635 | Z2980  | -    | putative plasmid partition protein                                         |

Table S10. The orthologue table of the O55 and O157 strains Page 86

| Locus_tag <sup>a</sup> |         |        | Gene   | Product                                                            |
|------------------------|---------|--------|--------|--------------------------------------------------------------------|
| CB9615                 | Sakai   | EDL933 |        |                                                                    |
| Indel-109              | ECs2636 | Z2981  | -      | putative transposase OrfB protein of insertion sequence IS629      |
| Indel-109              | ECs2637 | Z2982  | -      | putative transposase OrfA protein of insertion sequence IS629      |
| Indel-109              | ECsp017 | Z2983  | -      | putative tail fiber assembly protein of prophage CP-               |
| Indel-109              | ECs2638 | Z2984  | -      | hypothetical protein                                               |
| Indel-109              | ECs2639 | Z2985  | -      | putative tail protein                                              |
| Indel-109              | ECs2640 | Z2986  | -      | phage tail protein                                                 |
| Indel-109              | ECs2641 | Z2987  | -      | putative tail protein                                              |
| Indel-109              | ECs2642 | Z2988  | -      | putative phage tail protein                                        |
| Indel-109              | ECs2643 | Z2989  | -      | putative tail protein                                              |
| Indel-109              | ECs2644 | Z2990  | -      | putative tail tube protein                                         |
| Indel-109              | ECs2645 | Z2991  | -      | putative tail sheath protein                                       |
| Indel-109              | ECs2646 | Z2992  | -      | putative tail protein                                              |
| Indel-109              | ECs2647 | Z2993  | tra8_2 | transposase of insertion sequence IS30                             |
| Indel-109              | ECs2648 |        | -      | hypothetical protein                                               |
| Indel-109              | ECs2649 | Z2994  | -      | hypothetical protein                                               |
| G2583_2360             | leuZ    | RNA046 | leuZ   | Leu tRNA                                                           |
| G2583_2361             | cysT    | RNA047 | -      | Cys tRNA                                                           |
| G2583_2362             | glyW    | RNA048 | glyW   | Gly tRNA                                                           |
| G2583_2363             | ECs2650 | Z3000  | pgsA   | CDP-diacylglycerol--glycerol-3-phosphate 3-phosphatidyltransferase |
| G2583_2364             | ECs2651 | Z3001  | uvrC   | UvrABC system protein C                                            |
| G2583_2365             | ECs2652 | Z3002  | uvrY   | Response regulator uvrY                                            |
| G2583_2366             | ECs2653 | Z3003  | yecF   | hypothetical protein                                               |
| G2583_2367             | ECs2654 | Z3004  | sdiA   | DNA-binding transcriptional activator                              |
| G2583_2368             | ECs2655 | Z3005  | yecC   | Amino acid ABC transporter, ATP-binding protein                    |
| G2583_2369             | ECs2656 | Z3006  | yecS   | putative transport system permease protein                         |
| G2583_2370             | ECs2657 | Z3008  | dcyD   | Putative 1-aminocyclopropane-1-carboxylate                         |
| G2583_2370             | ECs2658 | Z3008  | dcyD   | Putative 1-aminocyclopropane-1-carboxylate                         |
| G2583_2371             | ECs2659 | Z3010  | fliY   | Cystine-binding periplasmic protein                                |
| G2583_2372             | ECs2660 | Z3011  | fliZ   | protein FliZ                                                       |
| G2583_2373             | ECs2661 | Z3012  | fliA   | RNA polymerase sigma factor for flagellar operon                   |
| G2583_2374             | ECs2662 | Z3013  | fliC   | Flagellin                                                          |
| G2583_2375             | ECs2663 | Z3014  | fliD   | Flagellar capping protein                                          |
| G2583_2376             | ECs2664 | Z3015  | fliS   | Flagellar protein FliS                                             |
| G2583_2377             | ECs2665 | Z3016  | fliT   | Flagellar protein fliT                                             |
| G2583_2378             | ECs2666 | Z3017  | amyA   | Alpha-amylase, cytoplasmic                                         |
| G2583_2379             | ECs2667 | Z3018  | yedD   | hypothetical protein                                               |
| G2583_2380             | ECs2668 | Z3019  | yedE   | predicted inner membrane protein                                   |
| G2583_2381             | ECs2669 | Z3020  | yedF   | UPF0033 protein yedF                                               |
| G2583_2382             | ECs2670 | Z3021  | yedK   | hypothetical protein                                               |
| G2583_2383             | ECs2671 | Z3022  | yedL   | Acetyltransferase, GNAT family                                     |
| G2583_2384             | ECs2672 | Z3023  | yedM   | putative secreted protein                                          |

Table S10. The orthologue table of the O55 and O157 strains Page 87

| Locus_tag <sup>a</sup> |         |        | Gene | Product                                                 |
|------------------------|---------|--------|------|---------------------------------------------------------|
| CB9615                 | Sakai   | EDL933 |      |                                                         |
| G2583_2385             | ECs2673 | Z3025  | yedL | acetyltransferase, gnat family                          |
| G2583_2386             | ECs2674 | Z3026  | yedM | putative secreted protein                               |
| G2583_2387             | ECs2675 | Z3024  | int  | Putative lambdoid prophage defective integrase          |
| G2583_2388             | ECs2676 | Z3027  | fliE | Flagellar hook-basal body complex protein fliE          |
| G2583_2389             | ECs2677 | Z3028  | fliF | Flagellar M-ring protein FliF precursor                 |
| G2583_2390             | ECs2678 | Z3029  | fliG | Flagellar motor switch protein fliG                     |
| G2583_2391             | ECs2679 | Z3030  | fliH | Flagellar biosynthesis                                  |
| G2583_2392             | ECs2680 | Z3031  | fliI | Flagellum-specific ATP synthase                         |
| G2583_2393             | ECs2681 | Z3032  | fliJ | Flagellar fliJ protein                                  |
| G2583_2394             | ECs2682 | Z3033  | fliK | Flagellar hook-length control protein FliK              |
| G2583_2395             | ECs2683 | Z3034  | fliL | Flagellar fliL protein                                  |
| G2583_2396             | ECs2684 | Z3035  | fliM | Flagellar motor switch protein FliM                     |
| G2583_2397             | ECs2685 | Z3036  | fliN | Flagellar motor switch protein FliN                     |
| G2583_2398             | ECs2686 | Z3037  | fliO | Flagellar biogenesis protein                            |
| G2583_2399             | ECs2687 | Z3038  | fliP | Flagellar biosynthetic protein fliP precursor           |
| G2583_2400             | ECs2688 | Z3039  | fliQ | hypothetical protein                                    |
| G2583_2401             | ECs2689 | Z3040  | fliR | Flagellar biosynthetic protein FliR                     |
| G2583_2402             | ECs2690 | Z3041  | rcsA | Colanic acid capsular biosynthesis activation protein A |
| G2583_2403             | ECs2691 | Z3042  | dsrB | putative oxidoreductase Fe-S binding subunit            |
| G2583_2404             | ECs2692 | Z3043  | yodD | hypothetical protein                                    |
| G2583_2405             | dsrA    | RNA049 | dsrA | ncRNA                                                   |
| G2583_2406             | ECs2693 | Z3045  | yedP | Putative mannosyl-3-phosphoglycerate phosphatase        |
| G2583_2407             | ECs2694 | Z3047  | yedQ | Cellulose synthesis regulatory protein                  |
| G2583_2408             | ECs2695 | Z3048  | yodC | hypothetical protein                                    |
| G2583_2409             | ECs2696 | Z3049  | yedI | putative membrane protein                               |
| G2583_2410             | ECs2697 | Z3050  | yedA | Uncharacterized inner membrane transporter yedA         |
| G2583_2411             | ECs2698 | Z3053  | vsr  | Very short patch repair protein                         |
| G2583_2412             | ECs2699 | Z3054  | dcm  | DNA-cytosine methyltransferase                          |
| G2583_2413             | ECs2700 | Z3055  | yedJ | Putative metal-dependent phosphohydrolase               |
| G2583_2414             | ECs2701 | Z3056  | yedR | hypothetical protein                                    |
| G2583_2415             | ECs2702 | Z3057  | ompS | Outer membrane protein                                  |
| G2583_2415             | ECs2703 | Z3058  | ompS | Outer membrane protein                                  |
| G2583_2416             | ECs2704 |        | -    | hypothetical protein                                    |
| G2583_2417             | ECs2705 | Z3059  | hchA | Chaperone protein hchA                                  |
| G2583_2418             | ECs2706 | Z3060  | yedV | Heavy metal sensor histidine kinase                     |
| G2583_2419             | ECs2707 | Z3061  | yedW | Heavy metal response regulator                          |
| G2583_2420             | ECs2708 | Z3062  | yedX | Transthyretin-like protein precursor                    |
| G2583_2421             | ECs2709 | Z3063  | yedY | UPF0190 protein yedY precursor                          |
| G2583_2422             | ECs2710 | Z3064  | yedZ | UPF0191 membrane protein yedZ                           |
| G2583_2423             | ECs2711 | Z3065  | yodA | Ribulose-phosphate 3-epimerase precursor                |
| G2583_2424             |         | Z3066  | -    | hypothetical protein                                    |
| G2583_2425             | ECs2712 | Z3067  | yodB | putative cytochrome                                     |
| G2583_2426             | ECs2713 |        | -    | hypothetical protein                                    |
| G2583_2427             |         | Z3069  | -    | unknown protein encoded within prophage CP-933U         |

Table S10. The orthologue table of the O55 and O157 strains Page 88

| Locus_tag <sup>a</sup> |           |           | Gene | Product                                                       |
|------------------------|-----------|-----------|------|---------------------------------------------------------------|
| CB9615                 | Sakai     | EDL933    |      |                                                               |
| G2583_2428             | ECs2714   | Z3071     | -    | unknown protein encoded within prophage CP-933U               |
| G2583_2429             | ECs2715   | Z3072     | -    | Tir-cytoskeleton coupling protein                             |
| Indel-111              | ECs2716   | Indel-111 | -    | hypothetical protein                                          |
| Indel-111              | ECs2717   | Indel-111 | -    | putative tail fiber protein                                   |
| Indel-111              | ECs2718   | Indel-111 | -    | putative outer membrane protein precursor                     |
| Indel-111              | ECs2719   | Indel-111 | -    | host specificity protein                                      |
| Indel-111              | ECs2720   | Indel-111 | -    | putative host specificity protein                             |
| Indel-111              | ECs2721   | Indel-111 | -    | putative tail assembly protein                                |
| Indel-111              | ECs2722   | Indel-111 | -    | putative tail assembly protein                                |
| Indel-111              | ECs2723   | Indel-111 | -    | putative minor tail protein                                   |
| Indel-111              | ECs2724   | Indel-111 | -    | putative minor tail protein                                   |
| Indel-111              | ECs2725   | Indel-111 | -    | putative tail length tape measure protein precursor           |
| Indel-111              | ECs2726   | Indel-111 | -    | putative tail length tape measure protein precursor           |
| Indel-111              | ECs2727   | Indel-111 | -    | putative minor tail protein                                   |
| Indel-111              | ECs2728   | Indel-111 | -    | putative minor tail protein                                   |
| Indel-111              | ECs2729   | Indel-111 | -    | hypothetical protein                                          |
| Indel-111              | ECs2730   | Indel-111 | -    | putative major head protein                                   |
| Indel-111              | ECs2731   | Indel-111 | -    | putative head decoration protein                              |
| Indel-111              | ECs2732   | Indel-111 | -    | putative head-tail preconnector protein                       |
| Indel-111              | ECs2733   | Indel-111 | -    | putative portal protein                                       |
| Indel-111              | ECs2734   | Indel-111 | -    | putative head completion protein                              |
| Indel-111              | ECs2735   | Indel-111 | -    | putative terminase large subunit                              |
| Indel-111              | ECs2736   | Indel-111 | -    | putative terminase small subunit                              |
| Indel-111              | ECs2737   | Indel-111 | -    | putative transcriptional regulator                            |
| Indel-111              | ECs2739   | Indel-111 | -    | putative endopeptidase                                        |
| Indel-111              | ECs2738   | Indel-111 | -    | putative lipoprotein precursor                                |
| Indel-111              | ECs2740   | Indel-111 | -    | hypothetical protein                                          |
| Indel-111              | ECs2741   | Indel-111 | -    | putative endolysin                                            |
| Indel-111              | ECs2742   | Indel-111 | -    | hypothetical protein                                          |
| Indel-111              | ECs2743   | Indel-111 | -    | putative holin protein                                        |
| Indel-111              | ECs2744   | Indel-111 | -    | putative transposase OrfA protein of insertion sequence IS629 |
| Indel-111              | ECs2745   | Indel-111 | -    | putative transposase OrfB protein of insertion sequence IS629 |
| Indel-112              | Indel-112 | Z3073     | -    | unknown protein encoded within prophage CP-933U               |
| Indel-112              | Indel-112 | Z3074     | -    | putative tail fiber protein of prophage CP-933U               |
| Indel-112              | Indel-112 | Z3075     | lomU | putative outer membrane protein of prophage CP-933U           |
| Indel-112              | Indel-112 | Z3077     | -    | putative tail fiber component J of prophage CP-933U           |
| Indel-112              | Indel-112 | Z3079     | -    | putative tail fiber component I of prophage CP-933U           |
| Indel-112              | Indel-112 | Z3081     | -    | putative tail fiber component K of prophage CP-933U           |
| Indel-112              | Indel-112 | Z3082     | -    | putative tail fiber component L of prophage CP-933U           |
| Indel-112              | Indel-112 | Z3083     | -    | putative tail fiber component M of prophage CP-933U           |
| Indel-112              | Indel-112 | Z3084     | -    | putative tail fiber component H of prophage CP-933U           |
| Indel-112              | Indel-112 | Z3085     | -    | putative tail fiber component T of prophage CP-933U           |



Table S10. The orthologue table of the O55 and O157 strains Page 89

| Locus_tag <sup>a</sup> |           |        | Gene  | Product                                                     |
|------------------------|-----------|--------|-------|-------------------------------------------------------------|
| CB9615                 | Sakai     | EDL933 |       |                                                             |
| Indel-112              | Indel-112 | Z3086  | -     | putative tail fiber component G of prophage CP-933U         |
| Indel-112              | Indel-112 | Z3087  | -     | putative tail fiber component V of prophage CP-933U         |
| Indel-112              | Indel-112 | Z3088  | -     | putative tail fiber component U of prophage CP-933U         |
| Indel-112              | Indel-112 | Z3089  | -     | putative tail fiber component Z of prophage CP-933U         |
| Indel-112              | Indel-112 | Z3090  | -     | unknown protein encoded within prophage CP-933U             |
| Indel-112              | Indel-112 | Z3091  | -     | unknown protein encoded within prophage CP-933U             |
| Indel-112              | Indel-112 | Z3092  | -     | unknown protein encoded within prophage CP-933U             |
| Indel-112              | Indel-112 | Z3093  | -     | unknown in IS629 encoded within prophage CP-933U            |
| Indel-112              | Indel-112 | Z3095  | -     | putative transposase encoded within prophage CP-            |
| Indel-112              | Indel-112 | Z3097  | -     | putative peptidase encoded within prophage CP-933U          |
| Indel-112              | Indel-112 | Z3098  | -     | putative head-tail preconnector protein of prophage CP-933U |
| Indel-112              | Indel-112 | Z3099  | -     | putative DNA packaging protein of prophage CP-933U          |
| Indel-112              | Indel-112 | Z3100  | -     | unknown protein encoded within prophage CP-933U             |
| Indel-112              | Indel-112 | Z3101  | -     | putative endopeptidase of prophage CP-933U                  |
| Indel-112              | Indel-112 | Z3103  | antU  | putative antirepressor protein of prophage CP-933U          |
| Indel-112              | Indel-112 | Z3104  | -     | putative endolysin of prophage CP-933U                      |
| Indel-112              | Indel-112 | Z3105  | -     | unknown protein encoded within prophage CP-933U             |
| Indel-112              | Indel-112 | Z3106  | -     | putative holin protein of prophage CP-933U                  |
| Indel-113              | ECs2746   | Z3107  | -     | hypothetical protein                                        |
| Indel-113              | ECs2747   |        | -     | hypothetical protein                                        |
| Indel-113              | ECs2748   | Z3108  | -     | hypothetical protein                                        |
| Indel-113              | ECs2749   | Z3109  | -     | hypothetical protein                                        |
| Indel-113              | argO7     | RNA050 | argO7 | Arg tRNA                                                    |
| Indel-113              | argN5     | RNA051 | argN5 | Arg tRNA                                                    |
| Indel-113              | ileZ7     | RNA052 | ileZ7 | Ile tRNA                                                    |
| Indel-113              | ECs2750   | Z3114  | -     | antiterminator                                              |
| Indel-113              | ECs2751   | Z3115  | -     | putative crossover junction endodeoxyribonuclease           |
| Indel-113              | ECs2752   | Z3116  | -     | hypothetical protein                                        |
| Indel-113              | ECs2753   |        | -     | hypothetical protein                                        |
| Indel-113              |           | Z3117  | -     | unknown protein encoded within prophage CP-933U             |
| Indel-113              | ECs2754   |        | -     | prophage maintenance protein                                |
| Indel-113              | ECs2755   | Z3118  | -     | hypothetical protein                                        |
| Indel-113              | ECs2756   | Z3119  | -     | hypothetical protein                                        |
| Indel-113              | ECs2757   | Z3120  | -     | hypothetical protein                                        |
| Indel-113              | ECs2758   |        | -     | hypothetical protein                                        |
| Indel-113              | ECs2759   | Z3121  | -     | hypothetical protein                                        |
| Indel-113              | ECs2760   |        | -     | hypothetical protein                                        |
| Indel-113              | ECs2761   | Z3122  | -     | hypothetical protein                                        |
| Indel-113              | ECs2762   | Z3123  | -     | putative phage replication protein                          |
| Indel-113              | ECs2763   | Z3124  | -     | hypothetical protein                                        |
| Indel-113              | ECs2764   | Z3125  | -     | hypothetical protein                                        |
| Indel-113              | ECs2765   |        | -     | putative cell division control protein                      |
| Indel-113              | ECs2766   | Z3126  | -     | putative repressor protein                                  |

Table S10. The orthologue table of the O55 and O157 strains Page 90

| Locus_tag <sup>a</sup> |           |           | Gene | Product                                                        |
|------------------------|-----------|-----------|------|----------------------------------------------------------------|
| CB9615                 | Sakai     | EDL933    |      |                                                                |
| Indel-113              | ECs2767   | Z3127     | -    | hypothetical protein                                           |
| Indel-113              | ECs2768   | Z3128     | -    | putative cell division inhibition protein                      |
| Indel-113              | ECs2769   |           | -    | hypothetical protein                                           |
| Indel-113              | ECs2770   | Z3129     | exoU | hypothetical protein                                           |
| Indel-113              | ECs2771   | Z3129     | exoU | hypothetical protein                                           |
| Indel-113              | ECs2772   |           | -    | hypothetical protein                                           |
|                        | ECs2773   | Z3130     | intU | putative integrase                                             |
| G2583_2430             | Indel-114 | Indel-114 | -    | Tail fiber protein                                             |
| G2583_2431             | Indel-114 | Indel-114 | -    | Enterobacterial Ail/Lom family protein                         |
| G2583_2432             | Indel-114 | Indel-114 | -    | Putative host specificity protein                              |
| G2583_2433             | Indel-114 | Indel-114 | -    | Superoxide dismutase [Cu-Zn]                                   |
| G2583_2434             | Indel-114 | Indel-114 | -    | hypothetical protein                                           |
| G2583_2435             | Indel-114 | Indel-114 | -    | Cell wall-associated hydrolases (invasion-associated proteins) |
| G2583_2436             | Indel-114 | Indel-114 | -    | Phage-related protein                                          |
| G2583_2437             | Indel-114 | Indel-114 | -    | Putative tail component of prophage CP-933R                    |
| G2583_2438             | Indel-114 | Indel-114 | -    | putative tail component of prophage CP-933O                    |
| G2583_2439             | Indel-114 | Indel-114 | -    | Phage tail assembly protein T                                  |
| G2583_2440             | Indel-114 | Indel-114 | -    | hypothetical protein                                           |
| G2583_2441             | Indel-114 | Indel-114 | -    | hypothetical protein                                           |
| G2583_2442             | Indel-114 | Indel-114 | -    | Putative tail component of prophage                            |
| G2583_2443             | Indel-114 | Indel-114 | -    | prophage minor tail protein Z                                  |
| G2583_2444             | Indel-114 | Indel-114 | -    | Phage Head-Tail Attachment                                     |
| G2583_2445             | Indel-114 | Indel-114 | -    | conserved hypothetical protein                                 |
| G2583_2446             | Indel-114 | Indel-114 | -    | phage major capsid protein E                                   |
| G2583_2447             | Indel-114 | Indel-114 | -    | Bacteriophage lambda head decoration protein D                 |
| G2583_2448             | Indel-114 | Indel-114 | -    | Periplasmic serine proteases (ClpP class)                      |
| G2583_2449             | Indel-114 | Indel-114 | -    | Bacteriophage capsid protein                                   |
| G2583_2450             | Indel-114 | Indel-114 | -    | putative head completion protein                               |
| G2583_2451             | Indel-114 | Indel-114 | -    | Putative terminase large subunit of prophage CP-933O           |
| G2583_2452             | Indel-114 | Indel-114 | -    | Prophage Qin DNA packaging protein NU1 homolog                 |
| G2583_2453             | Indel-114 | Indel-114 | -    | hypothetical protein                                           |
| G2583_2454             | Indel-114 | Indel-114 | -    | hypothetical protein                                           |
| G2583_2455             | Indel-114 | Indel-114 | -    | putative endopeptidase                                         |
| G2583_2456             | Indel-114 | Indel-114 | -    | conserved hypothetical protein                                 |
| G2583_2457             | Indel-114 | Indel-114 | -    | Phage-related lysozyme (muraminidase)                          |
| G2583_2458             | Indel-114 | Indel-114 | -    | hypothetical protein                                           |
| G2583_2459             | Indel-114 | Indel-114 | -    | Putative holin protein                                         |
| G2583_2460             | Indel-114 | Indel-114 | -    | YjhS                                                           |
| G2583_2461             | Indel-114 | Indel-114 | -    | Putative envelope protein encoded within prophage CP-933N      |
| G2583_2462             | Indel-114 | Indel-114 | -    | CAAX amino terminal protease family                            |
| G2583_2463             | Indel-114 | Indel-114 | ybcQ | Phage antitermination Q type 1 family                          |
| G2583_2464             | Indel-114 | Indel-114 | rusA | Crossover junction endodeoxyribonuclease RusA                  |

Table S10. The orthologue table of the O55 and O157 strains Page 91

| Locus_tag <sup>a</sup> |           |           | Gene | Product                                                                |
|------------------------|-----------|-----------|------|------------------------------------------------------------------------|
| CB9615                 | Sakai     | EDL933    |      |                                                                        |
| G2583_2465             | Indel-114 | Indel-114 | ydfU | hypothetical protein                                                   |
| G2583_2466             | Indel-114 | Indel-114 | -    | hypothetical protein                                                   |
| G2583_2467             | Indel-114 | Indel-114 | rem  | hypothetical protein                                                   |
| G2583_2468             | Indel-114 | Indel-114 | -    | Helix-turn-helix domain protein                                        |
| G2583_2469             | Indel-114 | Indel-114 | -    | hypothetical protein                                                   |
| G2583_2470             | Indel-114 | Indel-114 | -    | Putative cell killing protein encoded within cryptic prophage CP-933M  |
| G2583_2471             | Indel-114 | Indel-114 | -    | conserved hypothetical protein                                         |
| G2583_2472             | Indel-114 | Indel-114 | -    | LygF                                                                   |
| G2583_2473             | Indel-114 | Indel-114 | -    | Phage O protein family                                                 |
| G2583_2474             | Indel-114 | Indel-114 | ydfX | hypothetical protein                                                   |
| G2583_2475             | Indel-114 | Indel-114 | -    | hypothetical protein                                                   |
| G2583_2476             | Indel-114 | Indel-114 | dicA | Similar to DicA, regulator of DicB encoded by prophage                 |
| G2583_2477             | Indel-114 | Indel-114 | ydfA | hypothetical protein                                                   |
| G2583_2478             | Indel-114 | Indel-114 | -    | unknown protein encoded by prophage CP-933N                            |
| G2583_2479             | Indel-114 | Indel-114 | DicB | Putative regulator of cell division encoded by prophage CP-933O        |
| G2583_2480             | Indel-114 | Indel-114 | -    | hypothetical protein                                                   |
| G2583_2481             | Indel-114 | Indel-114 | recE | Exodeoxyribonuclease VIII                                              |
| G2583_2482             | Indel-114 | Indel-114 | -    | hypothetical protein                                                   |
| G2583_2483             | Indel-114 | Indel-114 | intU | Site-specific recombinase, phage integrase family                      |
| G2583_2484             | serU      | RNA053    | serU | Ser tRNA                                                               |
| G2583_2485             | ECs2774   | Z3132     | mtfA | hypothetical protein                                                   |
| G2583_2486             | asnT      | RNA054    | asnT | Asn tRNA                                                               |
| G2583_2487             | ECs2775   | Z3135     | yeeJ | Putative invasin                                                       |
|                        |           | Z3136     | -    | hypothetical protein                                                   |
| G2583_2488             | ECs2775   | Z3135     | -    | putative factor                                                        |
| G2583_2488             | ECs2776   | Z3135     | -    | putative factor                                                        |
| G2583_2489             | ECs2777   | Z3137     | -    | hypothetical protein                                                   |
| G2583_2490             | ECs2778   | Z3138     | shiA | Shikimate transporter                                                  |
| G2583_2491             | ECs2779   | Z3139     | amn  | AMP nucleosidase                                                       |
| G2583_2492             | ECs2780   | Z3140     | yeeN | UPF0082 protein yeeN                                                   |
| G2583_2493             | asnW      | RNA055    | asnW | Asn tRNA                                                               |
| G2583_2494             | ECs2781   | Z3143     | yeeO | MATE efflux family protein                                             |
| G2583_2495             | ECs2781   | Z3143     | yeeO | MATE efflux family protein                                             |
| G2583_2495             | ECs2782   | Z3144     | yeeO | MATE efflux family protein                                             |
| G2583_2496             | asnU      | RNA056    | asnU | Asn tRNA                                                               |
| G2583_2497             | ECs2783   | Z3146     | cbl  | transcriptional regulator Cbl                                          |
| G2583_2498             | ECs2784   | Z3147     | nac  | Nitrogen assimilation regulatory protein Nac                           |
| G2583_2499             | asnV      | RNA057    | asnV | Asn tRNA                                                               |
| G2583_2500             | ECs2785   | Z3150     | erfK | Conserved protein with NAD(P)-binding Rossmann-fold domain             |
| G2583_2501             | ECs2786   | Z3151     | cobT | Nicotinate-nucleotide--dimethylbenzimidazole phosphoribosyltransferase |

Table S10. The orthologue table of the O55 and O157 strains Page 92

| Locus_tag <sup>a</sup> |           |           | Gene  | Product                                                       |
|------------------------|-----------|-----------|-------|---------------------------------------------------------------|
| CB9615                 | Sakai     | EDL933    |       |                                                               |
| G2583_2502             | ECs2787   | Z3152     | cobS  | cobalamin synthase                                            |
| G2583_2503             | ECs2788   | Z3153     | cobU  | cobalamin synthase                                            |
| Indel-115              | ECs2789   | Z3154     | -     | hypothetical protein                                          |
| Indel-115              | ECs2790   | Z3155     | -     | hypothetical protein                                          |
| Indel-115              | ECs2791   | Z3156     | -     | hypothetical protein                                          |
| G2583_2504             | ECs2792   | Z3159     | yoeE  | Putative outer membrane receptor for iron compound or colicin |
|                        | ECs2793   |           | -     | hypothetical protein                                          |
| Indel-116              | ECs2794   | Z3161     | -     | putative transposase OrfA protein of insertion sequence IS629 |
| Indel-116              | ECs2795   | Z3162     | -     | putative transposase OrfB protein of insertion sequence IS629 |
| G2583_2505             | Indel-118 | Indel-118 | ibrB  | putative ParB-like nuclease                                   |
| G2583_2506             | Indel-118 | Indel-118 | ibrA  | Immunoglobulin-binding regulator A homolog                    |
| G2583_2507             | Indel-118 | Indel-118 | insN  | unknown protein encoded by IS911 within prophage CP-933L      |
| G2583_2508             | Indel-118 | Indel-118 | -     | putative transposase                                          |
| G2583_2509             | Indel-118 | Indel-118 | -     | Putative transposase subunit                                  |
| G2583_2510             | Indel-118 | Indel-118 | -     | hypothetical protein                                          |
| G2583_2511             | Indel-118 | Indel-118 | -     | hypothetical protein                                          |
| G2583_2512             | Indel-118 | Indel-118 | -     | hypothetical protein                                          |
| G2583_2513             | Indel-118 | Indel-118 | yfjP  | hypothetical protein                                          |
| G2583_2514             | ECs2796   | Indel-119 | -     | hypothetical protein                                          |
| G2583_2515             | ECs2797   | Indel-119 | -     | hypothetical protein                                          |
| G2583_2516             | ECs2798   | Indel-119 | -     | putative esterase                                             |
| G2583_2517             | ECs2799   | Indel-119 | -     | hypothetical protein                                          |
| G2583_2518             | ECs2800   | Indel-119 | -     | hypothetical protein                                          |
| G2583_2519             | ECs2801   | Indel-119 | yafZ  | conserved hypothetical protein                                |
| G2583_2520             | ECs2802   | Indel-119 | yafX  | Antirestriction protein                                       |
| G2583_2521             | ECs2803   | Indel-119 | yeeS  | DNA repair protein, RadC family                               |
| G2583_2522             | ECs2804   | Z3163     | yeeT  | hypothetical protein                                          |
| G2583_2523             | ECs2805   | Z3164     | yeeU  | Putative structural protein                                   |
| G2583_2524             | ECs2806   | Z3165     | yeeV1 | hypothetical protein                                          |
| G2583_2525             | ECs2807   | Z3166     | yeeW  | hypothetical protein                                          |
| G2583_2526             | ECs2808   | Z3167     | yoeF  | hypothetical protein                                          |
| G2583_2527             | ECs2809   | Z3168     | yeeX  | hypothetical protein                                          |
| G2583_2528             | ECs2810   | Z3169     | yeeA  | hypothetical protein                                          |
| G2583_2529             | ECs2811   | Z3170     | sbmC  | DNA gyrase inhibitory protein                                 |
| G2583_2530             | ECs2812   | Z3171     | dacD  | Serine-type D-Ala-D-Ala carboxypeptidase                      |
| G2583_2531             | ECs2813   | Z3173     | sbcB  | Exonuclease I                                                 |
| G2583_2532             | ECs2814   | Z3174     | yeeD  | hypothetical protein                                          |
| G2583_2533             | ECs2815   | Z3175     | yeeE  | Membrane protein, YeeE/YedE family                            |
| G2583_2534             | ECs2816   | Z3176     | yeeF  | Hypothetical transport protein YeeF                           |
| G2583_2535             | ECs2817   | Z3177     | yeeY  | Predicted DNA-binding transcriptional regulator               |

Table S10. The orthologue table of the O55 and O157 strains Page 93

| Locus_tag <sup>a</sup> |           |           | Gene | Product                                                                                            |
|------------------------|-----------|-----------|------|----------------------------------------------------------------------------------------------------|
| CB9615                 | Sakai     | EDL933    |      |                                                                                                    |
| G2583_2536             | ECs2818   | Z3178     | yeeZ | NAD dependent epimerase/dehydratase family protein                                                 |
|                        |           | Z3179     | -    | orf; hypothetical protein                                                                          |
| G2583_2537             | Indel-121 | Indel-121 | yoeB | Toxin yoeB                                                                                         |
| G2583_2538             | Indel-121 | Indel-121 | yefM | Antitoxin yefM                                                                                     |
| G2583_2539             | ECs2819   | Z3180     | hisL | his operon leader peptide                                                                          |
| G2583_2540             | ECs2820   | Z3181     | hisG | ATP phosphoribosyltransferase                                                                      |
| G2583_2541             | ECs2821   | Z3182     | hisD | Bifunctional histidinal dehydrogenase and histidinol dehydrogenase                                 |
| G2583_2542             | ECs2822   | Z3183     | hisC | Histidinol-phosphate aminotransferase                                                              |
| G2583_2543             | ECs2823   | Z3184     | hisB | Fused histidinol-phosphatase/imidazoleglycerol-phosphate dehydratase                               |
| G2583_2544             | ECs2824   | Z3185     | hisH | Imidazole glycerol phosphate synthase                                                              |
| G2583_2545             | ECs2825   | Z3186     | hisA | 1-(5-phosphoribosyl)-5-[(5-phosphoribosylamino)methylideneamino] imidazole-4-carboxamide isomerase |
| G2583_2546             | ECs2826   | Z3187     | hisF | Imidazole glycerol phosphate synthase subunit hisF                                                 |
| G2583_2547             | ECs2827   | Z3188     | hisI | Fused phosphoribosyl-AMP cyclohydrolase/phosphoribosyl-ATP pyrophosphatase                         |
| G2583_2548             | ECs2828   | Z3189     | cld  | O-antigen chain length determinant Wzz                                                             |
| G2583_2549             | ECs2829   | Z3190     | ugd  | UDP-glucose-6-dehydrogenase                                                                        |
| G2583_2550             | Indel-123 | Indel-123 | ydcC | Transposase IS4 family protein                                                                     |
| G2583_2551             | Indel-123 | Indel-123 | WbdK | Putative pyridoxamine 5-phosphate-dependent                                                        |
| G2583_2552             | Indel-123 | Indel-123 | wbcJ | WbdJ                                                                                               |
| G2583_2553             | ECs2830   | Z3191     | gnd  | 6-phosphogluconate dehydrogenase, decarboxylating                                                  |
| Indel-124              | ECs2831   | Z3192     | wbdR | acetyltransferase                                                                                  |
| Indel-124              | ECs2832   |           | -    | H repeat-associated protein                                                                        |
| Indel-124              | ECs2833   |           | -    | H repeat-associated protein                                                                        |
| Indel-124              | ECs2834   |           | -    | H repeat-associated protein                                                                        |
| G2583_2554             | Indel-125 | Indel-125 | rfpA | Putative glycosyltransferase WbgP                                                                  |
| G2583_2555             | Indel-125 | Indel-125 | wblT | Putative glycosyltransferase WbgO                                                                  |
| G2583_2556             | Indel-125 | Indel-125 | wzx  | O-antigen flippase Wzx                                                                             |
| G2583_2557             | Indel-125 | Indel-125 | -    | O-antigen polymerase Wzy                                                                           |
| G2583_2558             | Indel-125 | Indel-125 | fucT | Putative fucosyltransferase WbgN                                                                   |
| G2583_2559             | ECs2835   | Z3194     | cpsG | Phosphomannomutase ManB                                                                            |
| G2583_2560             | ECs2836   | Z3195     | manC | Mannose-1-P guanosyltransferase ManC                                                               |
| G2583_2561             | ECs2837   | Z3196     | wcaH | GDP-mannose mannosyl hydrolase                                                                     |
| G2583_2562             | ECs2839   | Z3198     | gmd  | GDP-mannose dehydratase Gmd                                                                        |
| Indel-128              | ECs2838   | Z3197     | fcl  | fucose synthetase                                                                                  |
| Indel-130              | ECs2840   | Z3199     | wbdP | putative glycosyl transferase                                                                      |
| Indel-130              | ECs2841   | Z3200     | per  | perosamine synthetase                                                                              |
| Indel-130              | ECs2842   | Z3201     | wzx  | O antigen flippase                                                                                 |
| Indel-130              | ECs2843   | Z3202     | wbdO | putative glycosyl transferase                                                                      |
| Indel-130              | ECs2844   | Z3203     | wzy  | O antigen polymerase                                                                               |
| Indel-130              | ECs2845   | Z3204     | wbdN | putative glycosyl transferase                                                                      |

Table S10. The orthologue table of the O55 and O157 strains Page 94

| Locus_tag <sup>a</sup> |           |           | Gene | Product                                                                                                                    |
|------------------------|-----------|-----------|------|----------------------------------------------------------------------------------------------------------------------------|
| CB9615                 | Sakai     | EDL933    |      |                                                                                                                            |
| G2583_2563             | Indel-131 | Indel-131 | wbgM | Putative galactosyltransferase WbgM                                                                                        |
| G2583_2564             | ECs2846   | Z3205     | galF | UDP-glucose pyrophosphorylase GalF                                                                                         |
| G2583_2565             | ECs2847   | Z3206     | gne  | UDP-N-acetylglucosamine 4-epimerase                                                                                        |
| G2583_2566             | ECs2848   | Z3207     | wcaM | Predicted colanic acid biosynthesis protein WcaM                                                                           |
| G2583_2567             | ECs2849   | Z3208     | wcaL | Predicted glycosyl transferase WcaL                                                                                        |
| G2583_2568             | ECs2850   | Z3209     | wcaK | Predicted pyruvyl transferase WcaK                                                                                         |
| G2583_2569             | ECs2851   | Z3210     | wzxC | Colanic acid exporter WzxC                                                                                                 |
| G2583_2570             | ECs2852   | Z3211     | wcaJ | Predicted UDP-glucose lipid carrier transferase WcaJ                                                                       |
| G2583_2571             | ECs2853   | Z3212     | cpsG | Phosphomannomutase CpsG                                                                                                    |
| G2583_2572             | ECs2854   | Z3213     | cpsB | Mannose-1-phosphate guanyltransferase CpsB                                                                                 |
| G2583_2573             | ECs2855   | Z3214     | wcaI | Predicted glycosyl transferase WcaI                                                                                        |
| G2583_2574             | ECs2856   | Z3215     | gmm  | GDP-mannose mannosyl hydrolase                                                                                             |
| G2583_2575             | ECs2857   | Z3216     | fcl  | Bifunctional GDP-fucose synthetase                                                                                         |
| G2583_2576             | ECs2858   | Z3217     | gmd  | GDP-mannose 4,6-dehydratase                                                                                                |
| G2583_2577             | ECs2859   | Z3218     | wcaF | Predicted acyl transferase WcaF                                                                                            |
| G2583_2578             | ECs2860   | Z3219     | wcaE | Predicted glycosyl transferase WcaE                                                                                        |
| G2583_2579             | ECs2861   | Z3220     | wcaD | Putative colanic acid polymerase                                                                                           |
| G2583_2580             | ECs2862   | Z3221     | wcaC | Predicted glycosyl transferase WcaC                                                                                        |
| G2583_2581             | ECs2863   | Z3222     | wcaB | Predicted acyl transferase WcaB                                                                                            |
| G2583_2582             | ECs2864   | Z3223     | wcaA | Predicted glycosyl transferase WcaA                                                                                        |
| G2583_2583             | ECs2865   | Z3224     | wzc  | Protein-tyrosine kinase Wzc                                                                                                |
| G2583_2584             | ECs2866   | Z3226     | wzb  | Low molecular weight protein-tyrosine-phosphatase wzb                                                                      |
| G2583_2585             | ECs2867   | Z3227     | wza  | Putative polysaccharide export protein wza precursor                                                                       |
| G2583_2586             | ECs2868   | Z3229     | yegH | Putative transport protein                                                                                                 |
| G2583_2587             | ECs2869   | Z3230     | -    | hypothetical protein                                                                                                       |
| G2583_2588             | ECs2870   | Z3231     | -    | Putative DNA-binding protein                                                                                               |
| G2583_2589             | ECs2871   | Z3232     | asmA | Predicted assembly protein AsmA                                                                                            |
| G2583_2590             | ECs2872   | Z3233     | dcd  | Deoxycytidine triphosphate deaminase                                                                                       |
| G2583_2591             | ECs2873   | Z3234     | udk  | Uridine/cytidine kinase                                                                                                    |
| G2583_2592             | ECs2874   | Z3235     | yegE | Predicted diguanylate cyclase                                                                                              |
| G2583_2592             | ECs2875   | Z3236     | yegE | Predicted diguanylate cyclase                                                                                              |
| G2583_2592             | ECs2876   | Z3236     | yegE | Predicted diguanylate cyclase                                                                                              |
| G2583_2593             | ECs2877   | Z3237     | alkA | 3-methyl-adenine DNA glycosylase II                                                                                        |
| G2583_2594             | ECs2878   | Z3238     | yegD | Predicted chaperone                                                                                                        |
| G2583_2595             | ECs2879   | Z3239     | yegI | conserved predicted protein                                                                                                |
| G2583_2596             | ECs2880   | Z3240     | yegK | conserved predicted protein                                                                                                |
| G2583_2597             | ECs2881   | Z3241     | yegL | Uncharacterized protein encoded in toxicity protection region of plasmid R478, contains von Willebrand factor (vWF) domain |
| G2583_2598             |           |           | -    | ncRNA                                                                                                                      |
| G2583_2599             |           |           | -    | ncRNA                                                                                                                      |
|                        |           | Z3242     | -    | hypothetical protein                                                                                                       |
| G2583_2600             | ECs2882   | Z3243     | mdtA | hypothetical protein                                                                                                       |
| G2583_2601             | ECs2883   | Z3244     | mdtB | Multidrug resistance protein mdtB                                                                                          |

Table S10. The orthologue table of the O55 and O157 strains Page 95

| Locus_tag <sup>a</sup> |           |           | Gene | Product                                                                     |
|------------------------|-----------|-----------|------|-----------------------------------------------------------------------------|
| CB9615                 | Sakai     | EDL933    |      |                                                                             |
| G2583_2602             | ECs2884   | Z3245     | mdtC | Multidrug resistance protein mdtC                                           |
| G2583_2603             | ECs2885   | Z3246     | mdtD | Multidrug resistance protein mdtD                                           |
| G2583_2604             | ECs2886   | Z3247     | baeS | Sensor histidine kinase BaeS                                                |
| G2583_2605             | ECs2887   | Z3248     | baeR | DNA-binding response regulator in two-component regulatory system with BaeS |
| G2583_2606             | ECs2888   | Z3249     | yegP | hypothetical protein                                                        |
| G2583_2607             | Indel-138 | Indel-138 | -    | Putative addiction module antidote protein, CC2985                          |
| G2583_2608             | Indel-138 | Indel-138 | -    | Plasmid stabilization system protein, RelE/ParE family                      |
| G2583_2609             | ECs2889   | Z3250     | yegQ | hypothetical protein                                                        |
| G2583_2610             |           |           | -    | ncRNA                                                                       |
| G2583_2611             | ECs2890   |           | -    | hypothetical protein                                                        |
| G2583_2612             | ECs2891   | Z3251     | yegR | hypothetical protein                                                        |
| G2583_2613             | ECs2892   | Z3252     | yegS | Lipid kinase yegS                                                           |
| G2583_2614             | Indel-140 | Indel-140 | -    | hypothetical protein                                                        |
| G2583_2615             | Indel-140 | Indel-140 | rbtT | D-arabitol membrane transporter                                             |
| G2583_2616             | Indel-140 | Indel-140 | -    | hypothetical protein                                                        |
| G2583_2617             | Indel-140 | Indel-140 | -    | Arabitol dehydrogenase                                                      |
| G2583_2618             | Indel-140 | Indel-140 | -    | D-arabitol repressor                                                        |
| G2583_2619             | Indel-140 | Indel-140 | -    | hypothetical protein                                                        |
| G2583_2620             | Indel-140 | Indel-140 | -    | Ribitol dehydrogenase                                                       |
| G2583_2621             | Indel-140 | Indel-140 | rIk  | Ribitol kinase                                                              |
| G2583_2622             | ECs2893   | Z3253     | gatR | Galactitol utilization operon repressor                                     |
| G2583_2623             | ECs2894   | Z3254     | gatD | Galactitol-1-phosphate 5-dehydrogenase                                      |
| G2583_2624             | ECs2895   | Z3255     | gatC | PTS system, galactitol-specific IIC component                               |
| G2583_2625             | ECs2896   | Z3256     | gatB | Galactitol-specific phosphotransferase enzyme IIB component                 |
| G2583_2626             | ECs2897   | Z3257     | gatA | Galactitol-specific phosphotransferase enzyme IIA component                 |
| G2583_2627             | ECs2898   | Z3258     | gatZ | Tagatose 6-phosphate kinase                                                 |
| G2583_2628             | ECs2899   | Z3259     | gatY | Class II aldolase, tagatose bisphosphate family                             |
| G2583_2629             | ECs2900   | Z3260     | fbaB | Fructose-bisphosphate aldolase class 1                                      |
| G2583_2630             | ECs2901   | Z3261     | yegT | Nucleoside transporter                                                      |
| G2583_2631             | ECs2902   | Z3262     | yegU | ADP-ribosylglycohydrolase family protein                                    |
| G2583_2632             | ECs2903   | Z3263     | yegV | Kinase, PfkB family                                                         |
| G2583_2633             | ECs2904   | Z3264     | yegW | transcriptional regulator, GntR family                                      |
| G2583_2634             | ECs2905   | Z3266     | yegX | hypothetical protein                                                        |
| G2583_2635             | ECs2906   | Z3267     | thiD | Hydroxymethylpyrimidine/phosphomethylpyrimidin e kinase                     |
| G2583_2636             | ECs2907   | Z3268     | thiM | Hydroxyethylthiazole kinase                                                 |
| G2583_2637             | ECs2908   | Z3269     | -    | hypothetical protein                                                        |
| G2583_2638             |           | Z3270     | -    | hypothetical protein                                                        |
| G2583_2639             | ECs2909   | Z3271     | -    | hypothetical protein                                                        |
| G2583_2640             | ECs2910   | Z3272     | -    | hypothetical protein                                                        |
| G2583_2641             | ECs2911   | Z3273     | rcnR | hypothetical protein                                                        |

Table S10. The orthologue table of the O55 and O157 strains Page 96

| Locus_tag <sup>a</sup> |         |           | Gene   | Product                                                       |
|------------------------|---------|-----------|--------|---------------------------------------------------------------|
| CB9615                 | Sakai   | EDL933    |        |                                                               |
| G2583_2642             | ECs2912 | Z3274     | rcnA   | Nickel/cobalt efflux system rcnA                              |
| G2583_2643             | ECs2913 | Z3275     | yohN   | hypothetical protein                                          |
| Indel-141              | ECs2914 | Z3276     | -      | putative type-1 fimbrial protein                              |
| G2583_2644             |         |           | yehA   | predicted fimbrial-like adhesin protein                       |
| G2583_2645             | ECs2915 | Z3277     | yehB   | fimbrial usher protein                                        |
| G2583_2646             | ECs2916 | Z3278     | yehC   | gram-negative pilus assembly chaperone                        |
| G2583_2647             | ECs2917 | Z3279     | yehD   | Fimbrial protein                                              |
| G2583_2648             | ECs2918 | Z3280     | yehE   | hypothetical protein                                          |
| G2583_2649             | ECs2919 | Z3281     | mrp    | Putative ATPase                                               |
| G2583_2650             | ECs2920 | Z3282     | metG   | Methionyl-tRNA synthetase                                     |
| G2583_2651             | ECs2921 | Z3283     | molR_A | putative molybdate metabolism regulator                       |
| G2583_2651             | ECs2922 | Z3284     | molR_A | putative molybdate metabolism regulator                       |
| G2583_2652             | ECs2922 | Z3284     | molR_B | putative molybdate metabolism regulator                       |
| G2583_2653             | ECs2923 | Z3285     | molR_C | interrupted molybdate metabolism regulator                    |
| G2583_2653             | ECs2924 | Z3286     | molR_C | interrupted molybdate metabolism regulator                    |
| G2583_2654             | ECs2925 | Z3287     | yehI   | Molybdate metabolism regulator MolR homolog                   |
| G2583_2655             | ECs2926 | Z3288     | yehK   | hypothetical protein                                          |
| Indel-144              |         | Z3289     | -      | hypothetical protein                                          |
|                        |         | Z3290     | -      | hypothetical protein                                          |
| G2583_2656             | ECs2927 | Z3291     | yehL   | hypothetical protein                                          |
| G2583_2657             | ECs2928 | Z3292     | yehM   | hypothetical protein                                          |
| G2583_2657             | ECs2929 | Z3293     | yehM   | hypothetical protein                                          |
| G2583_2658             | ECs2930 | Z3294     | yehP   | hypothetical protein                                          |
| G2583_2659             | ECs2931 | Z3295     | yehQ   | hypothetical protein                                          |
| Indel-145              | ECs2932 | Z3297     | -      | putative transposase OrfB protein of insertion sequence IS629 |
| Indel-145              | ECs2933 | Z3299     | -      | putative transposase OrfA protein of insertion sequence IS629 |
| G2583_2660             | ECs2934 | Z3300     | yehR   | Hypothetical lipoprotein YehR                                 |
| G2583_2661             | ECs2935 | Z3301     | yehS   | hypothetical protein                                          |
| G2583_2662             | ECs2936 | Z3302     | yehT   | putative two-component response-regulatory protein            |
| G2583_2663             | ECs2937 | Z3303     | yehU   | Sensor histidine kinase                                       |
| G2583_2664             | ECs2938 |           | mlrA   | DNA-binding transcriptional regulator                         |
| Indel-146              | ECs2939 | Z3305     | -      | hypothetical protein                                          |
| Indel-146              | ECs2940 | Z3306     | -      | hypothetical protein                                          |
| Indel-146              | ECs2941 | Z3307     | -      | putative tail fiber protein                                   |
| Indel-146              | ECs2941 | Z3309     | -      | putative tail fiber protein                                   |
| Indel-146              | ECs2942 | Z3310     | -      | putative outer membrane protein Lom precursor                 |
| Indel-147              | ECs2943 | Indel-147 | -      | putative host specificity protein                             |
| Indel-147              | ECs2944 | Indel-147 | -      | putative host specificity protein                             |
| Indel-147              | ECs2945 | Indel-147 | -      | putative tail assembly protein                                |
| Indel-147              | ECs2946 | Indel-147 | -      | putative tail assembly protein                                |
| Indel-147              | ECs2947 | Indel-147 | -      | putative minor tail protein                                   |
| Indel-147              | ECs2948 | Indel-147 | -      | putative minor tail protein                                   |



Table S10. The orthologue table of the O55 and O157 strains Page 97

| Locus_tag <sup>a</sup> |           |           | Gene | Product                                                       |
|------------------------|-----------|-----------|------|---------------------------------------------------------------|
| CB9615                 | Sakai     | EDL933    |      |                                                               |
| Indel-147              | ECs2949   | Indel-147 | -    | putative tail length tape measure protein precursor           |
| Indel-147              | ECs2950   | Indel-147 | -    | putative minor tail protein                                   |
| Indel-147              | ECs2951   | Indel-147 | -    | putative minor tail protein                                   |
| Indel-147              | ECs2952   | Indel-147 | -    | hypothetical protein                                          |
| Indel-147              | ECs2953   | Indel-147 | -    | putative minor tail protein                                   |
| Indel-147              | ECs2954   | Indel-147 | -    | putative minor tail protein                                   |
| Indel-147              | ECs2955   | Indel-147 | -    | hypothetical protein                                          |
| Indel-147              | ECs2956   | Indel-147 | -    | hypothetical membrane protein                                 |
| Indel-147              | ECs2957   | Indel-147 | -    | hypothetical protein                                          |
| Indel-147              | ECs2958   | Indel-147 | -    | putative transposase OrfA protein of insertion sequence IS629 |
| Indel-147              | ECs2959   | Indel-147 | -    | putative transposase OrfB protein of insertion sequence IS629 |
| Indel-147              | ECs2960   | Indel-147 | -    | putative protease/scaffold protein                            |
| Indel-147              | ECs2961   | Indel-147 | -    | putative portal protein                                       |
| Indel-147              | ECs2962   | Indel-147 | -    | hypothetical protein                                          |
| Indel-147              | ECs2963   | Indel-147 | -    | putative terminase large subunit                              |
| Indel-147              | ECs2964   | Indel-147 | -    | hypothetical protein                                          |
| Indel-148              | Indel-148 | Z3311     | -    | putative tail fiber protein of prophage CP-933V               |
| Indel-148              | Indel-148 | Z3312     | -    | putative superoxide dismutase                                 |
| Indel-148              | Indel-148 | Z3313     | -    | putative tail component of prophage CP-933V                   |
| Indel-148              | Indel-148 | Z3314     | -    | putative tail component of prophage CP-933V                   |
| Indel-148              | Indel-148 | Z3315     | -    | putative tail component of prophage CP-933V                   |
| Indel-148              | Indel-148 | Z3316     | -    | unknown protein encoded within prophage CP-933V               |
| Indel-148              | Indel-148 | Z3318     | -    | putative tail component of prophage CP-933V                   |
| Indel-148              | Indel-148 | Z3319     | -    | unknown protein encoded within prophage CP-933V               |
| Indel-148              | Indel-148 | Z3320     | -    | unknown protein encoded within prophage CP-933V               |
| Indel-148              | Indel-148 | Z3322     | -    | putative major tail subunit encoded within prophage CP-933V   |
| Indel-148              | Indel-148 | Z3323     | -    | unknown protein encoded within prophage CP-933V               |
| Indel-148              | Indel-148 | Z3325     | -    | unknown protein encoded within prophage CP-933V               |
| Indel-148              | Indel-148 | Z3326     | -    | unknown protein encoded within prophage CP-933V               |
| Indel-148              | Indel-148 | Z3327     | -    | unknown protein encoded within prophage CP-933V               |
| Indel-148              | Indel-148 | Z3328     | -    | putative portal protein for prophage CP-933V                  |
| Indel-148              | Indel-148 | Z3329     | -    | unknown protein encoded within prophage CP-933V               |
| Indel-148              | Indel-148 | Z3331     | -    | unknown protein encoded within prophage CP-933V               |
| Indel-148              | Indel-148 | Z3332     | -    | unknown protein encoded within prophage CP-933V               |
| Indel-148              | Indel-148 | Z3333     | -    | unknown protein encoded within prophage CP-933V               |
| Indel-148              | Indel-148 | Z3334     | -    | unknown protein encoded within prophage CP-933V               |
| Indel-148              | Indel-148 | Z3335     | -    | unknown protein encoded within prophage CP-933V               |
| Indel-149              | ECs2966   | Z3336     | -    | putative endopeptidase                                        |
| Indel-149              | ECs2965   |           | -    | lipoprotein Rz1 precursor                                     |
| Indel-149              | ECs2967   | Z3337     | antV | putative antirepressor protein                                |
| Indel-149              | ECs2968   | Z3339     | -    | putative endolysin                                            |

Table S10. The orthologue table of the O55 and O157 strains Page 98

| Locus_tag <sup>a</sup> |         |        | Gene  | Product                                         |
|------------------------|---------|--------|-------|-------------------------------------------------|
| CB9615                 | Sakai   | EDL933 |       |                                                 |
| Indel-149              | ECs2969 | Z3340  | -     | putative holin protein                          |
| Indel-149              | ECs2970 | Z3341  | -     | hypothetical protein                            |
| Indel-149              | ECs2971 |        | -     | hypothetical protein                            |
| Indel-149              | ECs2972 | Z3342  | -     | hypothetical protein                            |
| Indel-149              | ECs2973 | Z3343  | stx1B | Shiga toxin I subunit B precursor               |
| Indel-149              | ECs2974 | Z3344  | stx1A | Shiga toxin I subunit A precursor               |
| Indel-149              | ECs2975 | Z3345  | -     | antitermination protein                         |
| Indel-149              | ECs2976 |        | -     | hypothetical protein                            |
| Indel-149              | ECs2977 | Z3346  | -     | hypothetical protein                            |
| Indel-149              | ECs2978 | Z3347  | -     | hypothetical protein                            |
| Indel-149              | ECs2979 | Z3348  | -     | hypothetical protein                            |
| Indel-149              | ECs2980 |        | -     | hypothetical protein NinE                       |
| Indel-149              | ECs2981 | Z3349  | -     | putative DNA methylase                          |
| Indel-149              | ECs2982 | Z3351  | -     | hypothetical protein                            |
| Indel-149              | ECs2983 | Z3352  | -     | hypothetical protein                            |
| Indel-149              | ECs2984 | Z3353  | -     | hypothetical protein                            |
| Indel-149              | ECs2985 | Z3354  | -     | Ren protein                                     |
| Indel-149              | ECs2986 | Z3355  | -     | phage replication protein P                     |
| Indel-149              | ECs2987 | Z3356  | -     | phage replication protein O                     |
| Indel-149              | ECs2988 | Z3357  | -     | regulatory protein CII                          |
| Indel-149              | ECs2989 |        | -     | putative regulatory protein                     |
| Indel-149              | ECs2990 | Z3358  | -     | putative prophage repressor CI                  |
| Indel-149              | ECs2991 | Z3359  | -     | hypothetical protein                            |
| Indel-149              | ECs2992 | Z3360  | -     | putative membrane protein                       |
| Indel-149              | ECs2994 |        | -     | hypothetical protein                            |
| Indel-149              | ECs2993 | Z3361  | -     | putative regulatory protein                     |
| Indel-149              | ECs2995 | Z3362  | -     | putative superinfection exclusion protein       |
| Indel-149              | ECs2996 | Z3363  | -     | putative single-stranded DNA binding protein    |
| Indel-149              | ECs2997 |        | -     | regulatory protein cIII                         |
| Indel-149              | ECs2998 | Z3364  | -     | Kil protein                                     |
| Indel-149              | ECs2999 |        | -     | host-nuclease inhibitor protein gam             |
| Indel-149              | ECs3000 | Z3365  | -     | putative host-nuclease inhibitor protein Gam    |
| Indel-149              | ECs3001 | Z3366  | -     | recombination protein Bet                       |
| Indel-149              | ECs3002 | Z3367  | -     | exonuclease                                     |
| Indel-149              | ECs3003 |        | -     | hypothetical protein                            |
| Indel-149              | ECs3004 | Z3368  | -     | hypothetical protein                            |
| Indel-149              | ECs3005 | Z3369  | -     | hypothetical protein                            |
| Indel-149              | ECs3006 |        | -     | putative C4-type zinc finger protein            |
| Indel-149              | ECs3007 | Z3370  | -     | hypothetical protein                            |
| Indel-149              | ECs3008 |        | -     | hypothetical protein                            |
| Indel-149              | ECs3009 | Z3371  | -     | hypothetical protein                            |
| Indel-149              | ECs3010 | Z3372  | -     | hypothetical protein                            |
| Indel-149              | ECs3011 | Z3373  | -     | hypothetical protein                            |
| Indel-149              |         | Z3374  | -     | unknown protein encoded within prophage CP-933V |

Table S10. The orthologue table of the O55 and O157 strains Page 99

| Locus_tag <sup>a</sup> |         |        | Gene | Product                                                                         |
|------------------------|---------|--------|------|---------------------------------------------------------------------------------|
| CB9615                 | Sakai   | EDL933 |      |                                                                                 |
| Indel-149              | ECs3012 |        | -    | putative excisionase                                                            |
| Indel-149              | ECs3013 | Z3375  | intV | putative integrase                                                              |
| G2583_2664             | ECs3014 | Z3376  | mlrA | DNA-binding transcriptional regulator                                           |
| G2583_2665             | ECs3015 | Z3377  | yehW | ABC transporter, quaternary amine uptake (QAT) family, permease protein         |
| G2583_2666             | ECs3016 | Z3378  | yehX | ABC transporter, quaternary amine uptake (QAT) family, ATP-binding protein      |
| G2583_2667             | ECs3017 | Z3379  | yehY | ABC transporter, quaternary amine uptake (QAT) family, permease protein         |
| G2583_2668             | ECs3018 | Z3380  | osmF | Substrate-binding region of ABC-type glycine betaine transport system precursor |
| G2583_2669             | ECs3019 | Z3381  | bglX | Periplasmic beta-glucosidase                                                    |
| G2583_2670             | ECs3020 | Z3382  | dld  | D-lactate dehydrogenase                                                         |
| G2583_2671             | ECs3021 | Z3383  | pbpG | Penicillin-binding protein 7                                                    |
| G2583_2672             | ECs3022 | Z3384  | yohC | hypothetical protein                                                            |
| G2583_2673             | ECs3023 | Z3385  | yohD | hypothetical protein                                                            |
| G2583_2674             | ECs3024 | Z3386  | yohF | Putative 3-oxoacyl-[acyl-carrier-protein] reductase                             |
| G2583_2675             | ECs3025 | Z3387  | yohG | Multidrug resistance outer membrane protein mdtQ precursor                      |
| G2583_2676             |         | Z3388  | -    | hypothetical protein                                                            |
| G2583_2677             | ECs3026 | Z3389  | dusC | tRNA-dihydrouridine synthase C                                                  |
| G2583_2678             | ECs3027 | Z3390  | -    | FAD dependent oxidoreductase                                                    |
| G2583_2679             | ECs3028 | Z3391  | maiA | Putative glutathione-S-transferase                                              |
| G2583_2680             | ECs3029 | Z3392  | -    | Fumarylacetoacetate hydrolase family protein                                    |
| G2583_2681             | ECs3030 | Z3393  | gtdA | Gentisate 1,2-dioxygenase                                                       |
| G2583_2682             | ECs3031 | Z3394  | -    | Putative transporter                                                            |
| G2583_2683             | ECs3032 | Z3395  | -    | putative regulator                                                              |
| G2583_2684             | ECs3033 | Z3396  | yohJ | UPF0299 membrane protein yohJ                                                   |
| G2583_2685             | ECs3034 | Z3397  | yohK | Putative serotonin transporter                                                  |
| G2583_2686             | ECs3035 | Z3398  | cdd  | Cytidine deaminase                                                              |
| G2583_2687             | ECs3036 | Z3399  | sanA | hypothetical protein                                                            |
| G2583_2688             | ECs3037 | Z3400  | yeiS | hypothetical protein                                                            |
| G2583_2689             | ECs3038 | Z3401  | yeiT | Uncharacterized oxidoreductase yeiT                                             |
| G2583_2690             | ECs3039 | Z3402  | yeiA | putative oxidoreductase                                                         |
| G2583_2691             | ECs3040 | Z3403  | mgIC | Galactose ABC transporter, permease protein                                     |
| G2583_2692             | ECs3041 | Z3404  | mgIA | Galactose/methyl galactoside import ATP-binding protein mgIA                    |
| G2583_2693             | ECs3042 | Z3405  | mgIB | Galactose ABC transporter, periplasmic galactose-binding protein                |
| G2583_2694             | ECs3043 | Z3407  | galS | DNA-binding transcriptional repressor                                           |
| G2583_2695             | ECs3044 | Z3408  | yeiB | hypothetical protein                                                            |
| G2583_2696             | ECs3045 | Z3409  | foIE | GTP cyclohydrolase 1                                                            |
| G2583_2697             | ECs3046 | Z3410  | yeiG | S-formylglutathione hydrolase yeiG                                              |
| G2583_2698             | ECs3047 | Z3411  | cirA | Colicin I receptor                                                              |

Table S10. The orthologue table of the O55 and O157 strains Page 100

| Locus_tag <sup>a</sup> |         |        | Gene | Product                                                                     |
|------------------------|---------|--------|------|-----------------------------------------------------------------------------|
| CB9615                 | Sakai   | EDL933 |      |                                                                             |
| G2583_2699             | ECs3048 | Z3413  | lysP | Lysine-specific permease                                                    |
| G2583_2700             | ECs3049 | Z3414  | yeiE | putative DNA-binding transcriptional regulator                              |
| G2583_2701             | ECs3050 | Z3415  | yeiH | UPF0324 inner membrane protein yeiH                                         |
| G2583_2702             | ECs3051 | Z3416  | nfo  | Endonuclease 4                                                              |
| G2583_2703             | ECs3052 | Z3417  | yeiI | Kinase, pfkB family                                                         |
| G2583_2704             | ECs3053 | Z3418  | nupX | Nucleoside permease                                                         |
| G2583_2705             | ECs3054 | Z3419  | rihB | Pyrimidine-specific ribonucleoside hydrolase rihB                           |
| G2583_2706             | ECs3055 | Z3420  | yeiL | DNA-binding transcriptional activator of stationary phase nitrogen survival |
| G2583_2707             | ECs3056 | Z3421  | yeiM | Nucleoside transporter, NupC family                                         |
| G2583_2708             | ECs3057 | Z3422  | yeiN | Indigoidine synthase A like protein                                         |
| G2583_2709             | ECs3058 | Z3423  | yeiC | Kinase, pfkB family protein                                                 |
| G2583_2710             | ECs3059 | Z3425  | fruA | fructose-specific PTS system IIBC component                                 |
| G2583_2711             | ECs3060 | Z3426  | fruK | 1-phosphofructokinase                                                       |
| G2583_2712             | ECs3061 | Z3427  | fruB | Pts system mannitol-specific eicba component                                |
| G2583_2713             | ECs3062 | Z3428  | setB | Sugar efflux transporter B                                                  |
| G2583_2714             | ECs3063 | Z3430  | yeiP | Elongation factor P family protein                                          |
| G2583_2715             | ECs3064 | Z3431  | yeiQ | Mannitol dehydrogenase family protein                                       |
| G2583_2716             | ECs3065 | Z3432  | yeiR | CobW/P47K family protein                                                    |
| G2583_2717             | ECs3066 | Z3433  | yeiU | hypothetical protein                                                        |
| G2583_2718             | ECs3067 | Z3434  | spr  | Lipoprotein spr precursor                                                   |
| G2583_2719             | ECs3068 | Z3435  | rtn  | Putative cyclic diguanylate phosphodiesterase                               |
| G2583_2720             | ECs3069 | Z3436  | yejA | ABC transporter, periplasmic solute-binding protein                         |
| G2583_2721             | ECs3070 | Z3437  | yejB | Inner membrane ABC transporter permease protein                             |
| G2583_2722             | ECs3071 | Z3438  | yejE | ABC transporter, permease protein                                           |
| G2583_2723             | ECs3072 | Z3439  | yejF | ABC transporter, ATP-binding protein                                        |
| G2583_2724             | ECs3073 | Z3440  | yejG | hypothetical protein                                                        |
| G2583_2725             | ECs3074 | Z3441  | bcr  | Bicyclomycin resistance protein                                             |
| G2583_2726             | ECs3075 | Z3442  | rsuA | Pseudouridine synthase                                                      |
| G2583_2727             | ECs3076 | Z3443  | yejH | Putative helicase                                                           |
| G2583_2728             | ECs3077 | Z3444  | rpLY | 50S ribosomal protein L25                                                   |
| G2583_2729             | ECs3078 | Z3445  | yejK | Nucleoid-associated protein ndpA                                            |
| G2583_2730             | ECs3079 | Z3446  | yejL | UPF0352 protein yejL                                                        |
| G2583_2731             | ECs3080 | Z3447  | yejM | Inner membrane protein yejM                                                 |
| G2583_2732             | proL    | RNA058 | proL | Pro tRNA                                                                    |
| G2583_2733             | ECs3081 | Z3449  | yejO | Putative autotransporter, IS5K-containing                                   |
| G2583_2734             | ECs3082 | Z3450  | narP | Nitrate/nitrite response regulator NarP                                     |
| G2583_2735             | ECs3083 | Z3451  | ccmH | Cytochrome c-type biogenesis family protein                                 |
| G2583_2736             | ECs3084 | Z3452  | ccmG | Thiol:disulfide interchange protein dsbE                                    |
| G2583_2737             | ECs3085 | Z3453  | ccmF | Cytochrome c-type biogenesis protein CcmF                                   |
| G2583_2738             | ECs3086 | Z3454  | ccmE | Cytochrome c-type biogenesis protein ccmE                                   |
| G2583_2739             | ECs3087 | Z3455  | ccmD | heme exporter protein D                                                     |
| G2583_2740             | ECs3088 | Z3456  | ccmC | Heme exporter protein C                                                     |
| G2583_2741             | ECs3089 | Z3457  | ccmB | Heme exporter protein B                                                     |

Table S10. The orthologue table of the O55 and O157 strains Page 101

| Locus_tag <sup>a</sup> |           |           | Gene   | Product                                                                      |
|------------------------|-----------|-----------|--------|------------------------------------------------------------------------------|
| CB9615                 | Sakai     | EDL933    |        |                                                                              |
| G2583_2742             | ECs3090   | Z3458     | ccmA   | Cytochrome c biogenesis ATP-binding export protein<br>ccmA                   |
| G2583_2743             | ECs3091   | Z3459     | napC   | Cytochrome c-type protein napC                                               |
| G2583_2744             | ECs3092   | Z3460     | napB   | Cytochrome c-type protein                                                    |
| G2583_2745             | ECs3093   | Z3461     | napH   | Polyferredoxin                                                               |
| G2583_2746             | ECs3094   | Z3462     | napG   | Ferredoxin-type protein napG precursor                                       |
| G2583_2747             | ECs3095   | Z3463     | napA   | Periplasmic nitrate reductase precursor                                      |
| G2583_2748             | ECs3096   | Z3464     | napD   | Periplasmic nitrate reductase                                                |
| G2583_2749             | ECs3097   | Z3465     | napF   | Ferredoxin-type protein napF                                                 |
| G2583_2750             | ECs3098   | Z3467     | eco    | Ecotin precursor                                                             |
| G2583_2751             | ECs3099   | Z3468     | mgo    | Malate:quinone oxidoreductase                                                |
| G2583_2752             | ECs3100   | Z3469     | yojI   | ABC transporter ATP-binding protein                                          |
| G2583_2753             | ECs3101   | Z3470     | alkB   | alkylated DNA repair protein                                                 |
| G2583_2754             | ECs3102   | Z3471     | ada    | O6-methylguanine-DNA methyltransferase; transcription<br>activator/repressor |
| G2583_2755             | ECs3103   | Z3472     | apbE   | Thiamine biosynthesis lipoprotein apbE precursor                             |
| G2583_2756             | ECs3104   | Z3473     | ompC   | Outer membrane protein C precursor                                           |
| G2583_2757             | micF      |           | micF   | ncRNA                                                                        |
| G2583_2758             | ECs3105   | Z3475     | rcsD   | Sensor histidine kinase YojN                                                 |
| G2583_2759             | ECs3106   | Z3476     | rcsB   | Capsular synthesis regulator component B                                     |
| G2583_2760             | ECs3107   | Z3477     | rcsC   | Sensor histidine kinase/response regulator RcsC                              |
| G2583_2761             | ECs3108   | Z3478     | yfaP   | hypothetical protein                                                         |
| G2583_2762             | ECs3109   | Z3479     | yfaQ   | hypothetical protein                                                         |
| G2583_2762             | ECs3110   | Z3480     | yfaQ   | hypothetical protein                                                         |
| G2583_2763             | ECs3111   | Z3481     | yfaSR  | alpha-2-macroglobulin family protein                                         |
| G2583_2764             | Indel-150 | Indel-150 | -      | hypothetical protein                                                         |
| G2583_2765             | Indel-150 | Indel-150 | ISSf12 | ISSf12 ORF                                                                   |
| G2583_2766             | ECs3111   | Z3481     | yfaS   | alpha-2-macroglobulin family protein                                         |
| G2583_2767             | ECs3112   | Z3482     | yfaT   | hypothetical protein                                                         |
| G2583_2768             | ECs3113   | Z3483     | yfaA   | hypothetical protein                                                         |
| G2583_2769             | ECs3114   | Z3484     | gyrA   | DNA gyrase, A subunit                                                        |
| G2583_2770             | ECs3115   | Z3486     | ubiG   | 3-demethylubiquinone-9 3-methyltransferase                                   |
| G2583_2771             | ECs3116   | Z3487     | yfaL   | Putative ATP-binding component of a transport system                         |
| G2583_2772             | ECs3117   | Z3489     | nrdA   | Ribonucleoside-diphosphate reductase, alpha subunit                          |
| G2583_2773             | ECs3118   | Z3491     | nrdB   | Ribonucleoside-diphosphate reductase 1, beta subunit,                        |
| G2583_2774             | ECs3119   | Z3492     | yfaE   | Ferredoxin                                                                   |
| G2583_2775             | ECs3120   | Z3493     | inaA   | pH-inducible protein involved in stress response                             |
| G2583_2776             | ECs3121   | Z3494     | -      | transporter, major facilitator family                                        |
| G2583_2777             | ECs3122   | Z3495     | yfaH   | putative regulator                                                           |
| G2583_2778             | ECs3123   | Z3496     | -      | hypothetical protein                                                         |
| G2583_2779             | ECs3124   | Z3497     | glpQ   | Glycerophosphoryl diester phosphodiesterase                                  |
| G2583_2780             | ECs3125   | Z3498     | glpT   | Glycerol-3-phosphate transporter                                             |
| G2583_2781             | ECs3126   | Z3499     | glpA   | Anaerobic glycerol-3-phosphate dehydrogenase subunit                         |
| G2583_2782             | ECs3127   | Z3500     | glpB   | Anaerobic glycerol-3-phosphate dehydrogenase subunit                         |

Table S10. The orthologue table of the O55 and O157 strains Page 102

| Locus_tag <sup>a</sup> |         |           | Gene | Product                                                                                    |
|------------------------|---------|-----------|------|--------------------------------------------------------------------------------------------|
| CB9615                 | Sakai   | EDL933    |      |                                                                                            |
| G2583_2783             | ECs3128 | Z3501     | glpC | Anaerobic glycerol-3-phosphate dehydrogenase subunit                                       |
| G2583_2784             | ECs3129 | Z3502     | yfaD | hypothetical protein                                                                       |
| G2583_2785             | ECs3130 | Z3503     | yfaU | putative aldolase                                                                          |
| G2583_2786             | ECs3131 | Z3504     | yfaV | Putative transport protein                                                                 |
| Indel-151              | ECs3132 | Indel-151 | -    | putative transposase OrfA protein of insertion sequence IS629                              |
| Indel-151              | ECs3133 | Indel-151 | -    | putative transposase OrfB protein of insertion sequence IS629                              |
| G2583_2786             | ECs3134 | Z3504     | yfaV | Putative transport protein                                                                 |
| G2583_2787             | ECs3135 | Z3505     | yfaW | Putative racemase                                                                          |
| G2583_2788             | ECs3136 | Z3506     | yfaX | putative regulator                                                                         |
| G2583_2789             | ECs3137 | Z3507     | yfaY | CinA family protein                                                                        |
| G2583_2790             | ECs3138 | Z3508     | yfaZ | hypothetical protein                                                                       |
| G2583_2791             | ECs3139 | Z3509     | nudI | Nucleoside triphosphatase nudI                                                             |
| G2583_2792             | ECs3140 | Z3510     | ais  | protein induced by aluminum                                                                |
| G2583_2793             | ECs3141 | Z3511     | arnB | UDP-4-amino-4-deoxy-L-arabinose--oxoglutarate aminotransferase                             |
| G2583_2794             | ECs3142 | Z3512     | arnC | Undecaprenyl-phosphate 4-deoxy-4-formamido-L-arabinose transferase                         |
| G2583_2795             | ECs3143 | Z3513     | arnA | Bifunctional polymyxin resistance protein arnA [Includes: UDP-4-amino- 4-deoxy-L-arabinose |
| G2583_2796             | ECs3144 | Z3514     | yfbH | hypothetical protein                                                                       |
| G2583_2797             | ECs3145 | Z3515     | arnT | Undecaprenyl phosphate-alpha-4-amino-4-deoxy-L-arabinose arabinosyl transferase            |
| G2583_2798             |         | Z3516     | yfbW | Sucrose-6 phosphate hydrolase                                                              |
| G2583_2799             | ECs3146 | Z3517     | yfbJ | putative transport/receptor protein                                                        |
| G2583_2800             | ECs3147 | Z3518     | pmrD | Polymyxin resistance protein B                                                             |
| G2583_2801             | ECs3148 | Z3520     | menE | O-succinylbenzoate-CoA ligase                                                              |
| G2583_2802             | ECs3149 | Z3521     | menC | o-succinylbenzoate synthase                                                                |
| G2583_2803             | ECs3150 | Z3522     | menB | Naphthoate synthase                                                                        |
| G2583_2804             | ECs3151 | Z3523     | yfbB | 2-succinyl-6-hydroxy-2,4-cyclohexadiene-1-carboxylate synthase                             |
| G2583_2805             | ECs3152 | Z3524     | menD | 2-succinyl-5-enolpyruvyl-6-hydroxy-3-cyclohexene-1-carboxylate synthase                    |
| G2583_2806             | ECs3153 | Z3525     | menF | Isochorismate synthase, menaquinone-specific                                               |
| G2583_2807             | ECs3154 | Z3526     | elaB | regulatory protein AmpE                                                                    |
| G2583_2808             | ECs3155 | Z3527     | elaA | Acetyltransferase, GNAT family                                                             |
| G2583_2809             | ECs3156 | Z3528     | rbn  | ribonuclease Z                                                                             |
| G2583_2810             | ECs3157 | Z3529     | elaD | putative sulfatase / phosphatase                                                           |
| G2583_2811             | ECs3158 | Z3531     | yfbL | Peptidase, M28 family                                                                      |
| G2583_2812             | ECs3159 | Z3533     | yfbM | hypothetical protein                                                                       |
| G2583_2813             | ECs3160 | Z3534     | nuoN | NADH-quinone oxidoreductase subunit N                                                      |
| G2583_2814             | ECs3161 | Z3536     | nuoM | NADH-quinone oxidoreductase subunit M                                                      |
| G2583_2815             | ECs3162 | Z3537     | nuoL | NADH-quinone oxidoreductase, L subunit                                                     |

Table S10. The orthologue table of the O55 and O157 strains Page 103

| Locus_tag <sup>a</sup> |         |        | Gene | Product                                                         |
|------------------------|---------|--------|------|-----------------------------------------------------------------|
| CB9615                 | Sakai   | EDL933 |      |                                                                 |
| G2583_2816             | ECs3163 | Z3538  | nuoK | NADH-quinone oxidoreductase subunit K                           |
| G2583_2817             | ECs3164 | Z3539  | nuoJ | NADH-quinone oxidoreductase subunit J                           |
| G2583_2818             | ECs3165 | Z3540  | nuoI | NADH-quinone oxidoreductase subunit I                           |
| G2583_2819             | ECs3166 | Z3541  | nuoH | NADH-quinone oxidoreductase subunit H                           |
| G2583_2820             | ECs3167 | Z3542  | nuoG | NADH-quinone oxidoreductase                                     |
| G2583_2821             | ECs3168 | Z3543  | nuoF | NADH-quinone oxidoreductase, F subunit                          |
| G2583_2822             | ECs3169 | Z3544  | nuoE | NADH-quinone oxidoreductase, E subunit                          |
| G2583_2823             | ECs3170 | Z3545  | nuoC | NADH-quinone oxidoreductase, C/D subunit                        |
| G2583_2824             | ECs3171 | Z3546  | nuoB | NADH-quinone oxidoreductase subunit B                           |
| G2583_2825             | ECs3172 | Z3547  | nuoA | NADH-quinone oxidoreductase subunit A                           |
| G2583_2826             | ECs3173 | Z3549  | IrhA | Probable HTH-type transcriptional regulator IrhA                |
| G2583_2827             | ECs3174 | Z3551  | yfbQ | Uncharacterized aminotransferase yfbQ                           |
| G2583_2828             | ECs3175 | Z3552  | yfbR | 5'-nucleotidase yfbR                                            |
| G2583_2829             | ECs3176 | Z3553  | yfbS | Putative transport protein                                      |
| G2583_2830             | ECs3177 | Z3554  | yfbT | Sugar-phosphatase, YfbT                                         |
| G2583_2831             | ECs3178 | Z3555  | yfbU | UPF0304 protein yfbU                                            |
| G2583_2832             | ECs3179 | Z3556  | yfbV | UPF0208 membrane protein yfbV                                   |
| G2583_2833             | ECs3180 | Z3558  | ackA | Acetate kinase                                                  |
| G2583_2834             | ECs3181 | Z3559  | pta  | Phosphate acetyltransferase                                     |
| G2583_2835             | ECs3182 | Z3560  | yfcC | C4-dicarboxylate anaerobic carrier protein                      |
| G2583_2836             | ECs3183 | Z3561  | yfcD | Uncharacterized Nudix hydrolase yfcD                            |
| G2583_2837             | ECs3184 | Z3562  | yfcE | Phosphodiesterase yfcE                                          |
| G2583_2838             | ECs3185 | Z3563  | yfcF | Glutathione S-transferase domain protein                        |
| G2583_2839             | ECs3186 | Z3564  | yfcG | Glutathione S-transferase                                       |
| G2583_2840             | ECs3187 | Z3565  | folX | D-erythro-7,8-dihydroneopterin triphosphate epimerase           |
| G2583_2841             | ECs3188 | Z3566  | yfcH | NAD-binding domain 4 protein                                    |
| G2583_2842             | ECs3189 | Z3567  | yfcI | hypothetical protein                                            |
| G2583_2843             | ECs3190 | Z3568  | hisP | ATP-binding component of histidine transport                    |
| G2583_2844             | ECs3191 | Z3569  | hisM | Histidine transport system permease protein hisM                |
| G2583_2845             | ECs3192 | Z3570  | hisQ | ABC-type arginine transport system, permease component          |
| G2583_2846             | ECs3193 | Z3571  | hisJ | Histidine-binding periplasmic protein precursor                 |
| G2583_2847             | ECs3194 | Z3572  | argT | Lysine-arginine-ornithine-binding periplasmic protein precursor |
| G2583_2848             | ECs3195 | Z3573  | ubiX | 3-octaprenyl-4-hydroxybenzoate carboxy-lyase                    |
| G2583_2849             | ECs3196 | Z3574  | purF | Amidophosphoribosyltransferase                                  |
| G2583_2850             | ECs3197 | Z3575  | cvpA | CvpA protein                                                    |
| G2583_2851             | ECs3198 | Z3576  | dedD | Sporulation and cell division repeat protein                    |
| G2583_2852             | ECs3199 | Z3577  | folC | Tetrahydrofolate synthase/dihydrofolate synthase                |
| G2583_2853             | ECs3200 | Z3578  | accD | Acetyl-coenzyme A carboxylase carboxyl transferase subunit beta |
| G2583_2854             | ECs3201 | Z3579  | dedA | hypothetical protein                                            |
| G2583_2855             | ECs3202 | Z3580  | truA | tRNA pseudouridine synthase A                                   |
| G2583_2856             | ECs3203 | Z3581  | usg  | USG-1 protein                                                   |

Table S10. The orthologue table of the O55 and O157 strains Page 104

| Locus_tag <sup>a</sup> |         |        | Gene | Product                                               |
|------------------------|---------|--------|------|-------------------------------------------------------|
| CB9615                 | Sakai   | EDL933 |      |                                                       |
| G2583_2857             | ECs3204 | Z3582  | pdxB | Erythronate-4-phosphate dehydrogenase                 |
| G2583_2858             | ECs3205 | Z3583  | flk  | Cell division protein                                 |
| G2583_2859             | ECs3206 | Z3585  | yfcJ | Permeases of the major facilitator superfamily        |
| G2583_2860             | ECs3207 | Z3586  | fabB | 3-oxoacyl-[acyl-carrier-protein] synthase 1           |
| G2583_2861             | ECs3208 | Z3587  | mnmC | UPF0209 protein yfcK                                  |
| G2583_2862             | ECs3209 | Z3588  | yfcL | hypothetical protein                                  |
| G2583_2863             | ECs3210 | Z3589  | yfcM | putative transporting ATPase                          |
| G2583_2864             | ECs3211 | Z3590  | yfcA | Inner membrane protein yfcA                           |
| G2583_2865             | ECs3212 | Z3591  | mepA | Penicillin-insensitive murein endopeptidase precursor |
| G2583_2866             | ECs3213 | Z3592  | aroC | Chorismate synthase                                   |
| G2583_2867             | ECs3215 | Z3593  | prmB | Putative adenine-specific methylase                   |
| G2583_2868             | ECs3214 | Z3594  | yfcN | UPF0115 protein yfcN                                  |
| G2583_2869             | ECs3216 | Z3595  | yfcO | hypothetical protein                                  |
| G2583_2870             | ECs3217 | Z3596  | yfcP | Fimbrial protein                                      |
| G2583_2871             | ECs3218 | Z3597  | yfcQ | Fimbrial subunit                                      |
| G2583_2872             | ECs3219 | Z3598  | yfcR | Putative minor fimbrial subunit                       |
| G2583_2873             | ECs3220 | Z3599  | yfcS | Chaperone protein PapD                                |
| G2583_2874             | ECs3221 | Z3600  | yfcU | Fimbrial usher family protein                         |
| G2583_2875             | ECs3222 | Z3601  | yfcV | Fimbrial protein                                      |
| G2583_2876             | ECs3223 | Z3603  | sixA | Phosphohistidine phosphatase SixA                     |
| G2583_2877             | ECs3224 | Z3604  | fadJ | Fatty oxidation complex, alpha subunit FadJ           |
| G2583_2878             | ECs3225 | Z3605  | fadI | 3-ketoacyl-CoA thiolase                               |
| G2583_2879             | ECs3226 | Z3606  | yfcZ | hypothetical protein                                  |
| G2583_2880             | ECs3227 | Z3608  | fadL | Transport of long-chain fatty acids                   |
| G2583_2881             | ECs3228 | Z3609  | yfdF | hypothetical protein                                  |
| G2583_2882             | ECs3229 | Z3610  | vacJ | Lipoprotein, VacJ family                              |
| G2583_2883             | ECs3230 | Z3611  | yfdC | putative transport                                    |
| G2583_2884             | argW    | RNA059 | argW | Arg tRNA                                              |
| G2583_2885             | ECs3231 | Z3613  | intS | putative prophage integrase                           |
| G2583_2886             | ECs3232 | Z3614  | -    | Putative prophage DNA injection protein               |
| G2583_2887             | ECs3233 | Z3615  | -    | Phage DNA transfer protein                            |
| G2583_2888             | ECs3234 | Z3616  | -    | hypothetical protein                                  |
| G2583_2889             | ECs3235 | Z3617  | -    | Gene 9 protein                                        |
| G2583_2890             | ECs3236 | Z3618  | -    | hypothetical protein                                  |
|                        | ECs3237 |        | -    | hypothetical protein                                  |
|                        |         | Z3619  | -    | hypothetical protein                                  |
| G2583_2891             | ECs3238 | Z3620  | -    | hypothetical protein                                  |
| G2583_2892             | ECs3239 | Z3621  | -    | hypothetical protein                                  |
| G2583_2893             | ECs3240 | Z3622  | -    | Resolvase domain protein                              |
| G2583_2894             | ECs3241 | Z3623  | lacY | Oligosaccharide:H <sup>+</sup> symporter              |
| G2583_2895             | ECs3242 | Z3624  | cscK | Fructokinase                                          |
| G2583_2896             | ECs3243 | Z3625  | -    | Sucrose-6-phosphate hydrolase                         |
| G2583_2897             | ECs3244 | Z3626  | -    | Sugar binding transcriptional regulator, LacI family  |
| G2583_2898             |         | Z3627  | dsdX | Putative uncharacterized dsdX-like protein            |



Table S10. The orthologue table of the O55 and O157 strains Page 105

| Locus_tag <sup>a</sup> |         |           | Gene | Product                                                                      |
|------------------------|---------|-----------|------|------------------------------------------------------------------------------|
| CB9615                 | Sakai   | EDL933    |      |                                                                              |
| G2583_2899             | ECs3245 | Z3628     | dsdA | D-serine ammonia-lyase                                                       |
| G2583_2900             | ECs3246 | Z3629     | emrY | Multidrug resistance protein Y                                               |
| G2583_2901             | ECs3247 | Z3630     | emrK | Drug resistance MFS transporter, membrane fusion protein (MFP) subunit EmrK  |
| G2583_2902             | ECs3248 | Z3631     | evgA | Positive transcription regulator evgA                                        |
| G2583_2903             | ECs3249 | Z3632     | evgS | hybrid sensory histidine kinase in two-component regulatory system with EvgA |
| G2583_2904             | ECs3250 | Z3633     | yfdE | hypothetical protein                                                         |
| G2583_2904             | ECs3251 | Z3634     | yfdE | hypothetical protein                                                         |
| G2583_2905             | ECs3252 | Z3635     | yfdV | Uncharacterized transporter yfdV                                             |
| G2583_2906             | ECs3253 | Z3637     | oxc  | Thiamine pyrophosphate-dependent enzyme                                      |
| G2583_2907             | ECs3254 | Z3639     | frc  | Formyl-coenzyme A transferase                                                |
| G2583_2908             | ECs3255 | Z3640     | yfdX | Protein yfdX precursor                                                       |
| G2583_2909             | ECs3256 | Z3641     | ypdI | hypothetical protein                                                         |
| G2583_2910             | ECs3257 | Z3642     | yfdY | hypothetical protein                                                         |
| G2583_2911             | ECs3258 | Z3643     | lpxP | hypothetical protein                                                         |
| G2583_2912             | ECs3259 | Z3644     | yfdZ | Aminotransferase, classes I and II                                           |
| G2583_2913             | ECs3260 | Z3645     | ypdA | Inner membrane protein ypdA                                                  |
| G2583_2914             | ECs3261 | Z3646     | ypdB | Uncharacterized response regulatory protein ypdB                             |
| G2583_2915             | ECs3262 | Z3647     | ypdC | helix-turn-helix- domain containing protein AraC type                        |
| G2583_2916             | ECs3263 | Z3648     | fryA | Putative phosphoenolpyruvate-protein                                         |
| G2583_2917             | ECs3264 | Z3649     | ypdE | Aminopeptidase                                                               |
| G2583_2918             | ECs3265 | Z3651     | ypdF | Aminopeptidase YpdF                                                          |
| G2583_2919             | ECs3266 | Z3652     | fryC | Fructose-like permease IIC component                                         |
| G2583_2920             | ECs3267 | Z3653     | fryB | Fructose-like phosphotransferase enzyme IIB component 1                      |
| G2583_2921             | ECs3268 | Z3654     | glk  | Glucokinase                                                                  |
| G2583_2922             | ECs3269 | Z3655     | yfeO | Putative ion-transport protein yfeO                                          |
| G2583_2923             | ECs3270 | Z3656     | ypeC | conserved hypothetical protein                                               |
| G2583_2924             |         | Z3657     | -    | hypothetical protein                                                         |
| G2583_2925             | ECs3271 | Z3658     | mntH | Manganese transport protein mntH                                             |
| G2583_2926             | ECs3272 | Z3659     | nupC | Nucleoside transporter NupC                                                  |
| G2583_2927             | ECs3273 | Z3660     | yfeA | hypothetical protein                                                         |
| G2583_2928             | alaX    | RNA060    | alaX | Ala tRNA                                                                     |
| G2583_2929             | alaW    | Indel-153 | alaW | Ala tRNA                                                                     |
| G2583_2930             | ECs3274 | Z3662     | yfeC | hypothetical protein                                                         |
| G2583_2931             | ECs3275 | Z3663     | yfeD | hypothetical protein                                                         |
| G2583_2932             | ECs3276 | Z3664     | ydcM | IS605 family transposase orfB                                                |
| G2583_2933             | ECs3277 |           | -    | Putative transposase TnA                                                     |
| G2583_2934             | ECs3278 | Z3665     | gltX | Glutamyl-tRNA synthetase                                                     |
| G2583_2935             | valU    | RNA061    | valU | Val tRNA                                                                     |
| G2583_2936             | valX    | RNA062    | valX | Val tRNA                                                                     |
| G2583_2937             | valY    | RNA063    | valY | Val tRNA                                                                     |
| G2583_2938             | lysV    | RNA064    | lysV | Lys tRNA                                                                     |

Table S10. The orthologue table of the O55 and O157 strains Page 106

| Locus_tag <sup>a</sup> |         |        | Gene | Product                                                                                                |
|------------------------|---------|--------|------|--------------------------------------------------------------------------------------------------------|
| CB9615                 | Sakai   | EDL933 |      |                                                                                                        |
| G2583_2939             | ECs3279 | Z3672  | flxA | hypothetical protein                                                                                   |
| G2583_2940             | ECs3280 | Z3673  | yfeR | transcriptional regulator, LysR family protein                                                         |
| G2583_2940             | ECs3281 | Z3674  | yfeR | transcriptional regulator, LysR family protein                                                         |
| G2583_2941             | ECs3282 | Z3675  | yfeH | putative cytochrome oxidase                                                                            |
| G2583_2942             |         | Z3676  | ypeB | hypothetical protein                                                                                   |
| G2583_2943             | ECs3283 | Z3677  | ligA | DNA ligase                                                                                             |
| G2583_2944             | ECs3284 | Z3678  | zipA | Cell division protein ZipA                                                                             |
| G2583_2945             | ECs3285 | Z3679  | cysZ | putative sulfate transport protein CysZ                                                                |
| G2583_2946             | ECs3286 | Z3680  | cysK | Cysteine synthase A                                                                                    |
| G2583_2947             | ECs3287 | Z3681  | ptsH | PTS system, phosphocarrier protein                                                                     |
| G2583_2948             | ECs3288 | Z3682  | ptsI | Phosphoenolpyruvate-protein phosphotransferase                                                         |
| G2583_2949             | ECs3289 | Z3683  | crr  | Glucose-specific phosphotransferase enzyme IIA component                                               |
| G2583_2950             | ECs3290 | Z3684  | pdxK | pyridoxal kinase                                                                                       |
| G2583_2951             | ECs3291 | Z3685  | yfeK | hypothetical protein                                                                                   |
| G2583_2952             | ECs3292 | Z3686  | cysM | Cysteine synthase                                                                                      |
| G2583_2953             | ECs3293 | Z3687  | cysA | Sulfate/thiosulfate import ATP-binding protein cysA                                                    |
| G2583_2954             | ECs3294 | Z3688  | cysW | Sulfate ABC transporter, permease protein CysW                                                         |
| G2583_2955             | ECs3295 | Z3689  | cysU | Sulfate ABC transporter, permease protein CysT                                                         |
| G2583_2956             | ECs3296 | Z3690  | cysP | Sulfate/thiosulfate ABC transporter, periplasmic sulfate/thiosulfate- binding protein                  |
| G2583_2957             | ECs3297 | Z3691  | ucpA | Oxidoreductase ucpA                                                                                    |
| G2583_2958             | ECs3298 | Z3692  | yfeT | hypothetical protein                                                                                   |
| G2583_2959             | ECs3299 | Z3693  | murQ | Predicted sugar phosphate isomerase                                                                    |
| G2583_2960             | ECs3300 | Z3694  | murP | Phosphoenolpyruvate-dependent sugar phosphotransferase system EIIABC, probable beta-glucoside-specific |
| G2583_2961             | ECs3301 | Z3695  | yfeW | Putative hydrolase/beta lactamase fusion protein                                                       |
| G2583_2962             | ECs3302 | Z3696  | yfeX | hypothetical protein                                                                                   |
| G2583_2963             | ECs3303 | Z3697  | yfeY | hypothetical protein                                                                                   |
| G2583_2964             | ECs3304 | Z3698  | yfeZ | hypothetical protein                                                                                   |
| G2583_2965             | ECs3305 | Z3699  | ypeA | Acetyltransferase ypeA                                                                                 |
| G2583_2966             | ECs3306 | Z3700  | amiA | N-acetylmuramoyl-L-alanine amidase                                                                     |
| G2583_2967             | ECs3307 | Z3701  | hemF | Coproporphyrinogen III oxidase, aerobic                                                                |
| G2583_2968             | ECs3308 | Z3702  | eutR | AraC-type DNA-binding domain-containing proteins                                                       |
| G2583_2969             | ECs3309 | Z3703  | eutK | Ethanolamine utilization protein EutK                                                                  |
| G2583_2970             | ECs3310 | Z3704  | eutL | Putative ethanolamine utilization protein EutL                                                         |
| G2583_2971             | ECs3311 | Z3705  | eutC | Ethanolamine ammonia-lyase light chain                                                                 |
| G2583_2972             | ECs3312 | Z3706  | eutB | Ethanolamine ammonia-lyase heavy chain                                                                 |
| G2583_2973             | ECs3313 | Z3707  | eutA | Ethanolamine utilization protein EutA                                                                  |
| G2583_2974             | ECs3314 | Z3708  | eutH | EutH                                                                                                   |
| G2583_2975             | ECs3315 | Z3709  | eutG | EutG                                                                                                   |
| G2583_2976             | ECs3316 | Z3710  | eutJ | Ethanolamine utilization protein EutJ                                                                  |
| G2583_2977             | ECs3317 | Z3711  | eutE | Ethanolamine utilization                                                                               |

Table S10. The orthologue table of the O55 and O157 strains Page 107

| Locus_tag <sup>a</sup> |         |        | Gene | Product                                                       |
|------------------------|---------|--------|------|---------------------------------------------------------------|
| CB9615                 | Sakai   | EDL933 |      |                                                               |
| G2583_2978             | ECs3318 | Z3712  | eutN | Ethanolamine utilization protein                              |
| G2583_2979             | ECs3319 | Z3713  | eutM | Detox protein                                                 |
| G2583_2980             | ECs3320 | Z3714  | eutD | Ethanolamine utilization protein EutD                         |
| G2583_2981             | ECs3321 | Z3715  | eutT | Ethanolamine utilization cobalamin adenosyltransferase        |
| G2583_2982             | ECs3322 | Z3716  | eutQ | Ethanolamine utilization protein EutQ                         |
| G2583_2983             | ECs3323 | Z3717  | eutP | hypothetical protein                                          |
| G2583_2984             | ECs3324 | Z3718  | eutS | hypothetical protein                                          |
| G2583_2985             | ECs3325 | Z3719  | maeB | Malate dehydrogenase (Oxaloacetate-decarboxylating) (NADP(+)) |
| G2583_2986             | ECs3326 | Z3720  | talA | Transaldolase A                                               |
| G2583_2987             | ECs3327 | Z3721  | tktB | Transketolase 2                                               |
| G2583_2988             | ECs3328 | Z3722  | ypfG | hypothetical protein                                          |
| G2583_2989             | ECs3329 | Z3723  | nudK | GDP-mannose pyrophosphatase nudK                              |
| G2583_2990             | ECs3330 | Z3724  | aegA | putative oxidoreductase Fe-S binding subunit                  |
| G2583_2991             | ECs3331 | Z3726  | narQ | Nitrate/nitrite sensor histidine kinase NarQ                  |
| G2583_2992             | ECs3332 | Z3727  | acrD | Probable aminoglycoside efflux pump                           |
| G2583_2993             | ECs3333 | Z3729  | yffB | ArsC family protein                                           |
| G2583_2994             | ECs3334 | Z3730  | dapE | Succinyl-diaminopimelate desuccinylase                        |
| G2583_2995             |         | Z3731  | ypfN | UPF0370 protein ypfN                                          |
| G2583_2996             | ECs3335 | Z3732  | ypfH | Esterase, AB hydrolase 2 family                               |
| G2583_2997             | ECs3336 | Z3733  | ypfI | hypothetical protein                                          |
| G2583_2998             | ECs3337 | Z3734  | ypfJ | hypothetical protein                                          |
| G2583_2999             | ECs3338 | Z3735  | purC | Phosphoribosylaminoimidazole-succinocarboxamide synthase      |
| G2583_3000             | ECs3339 | Z3736  | nlpB | Lipoprotein-34                                                |
| G2583_3001             | ECs3340 | Z3737  | dapA | Dihydrodipicolinate synthase                                  |
| G2583_3002             | ECs3341 | Z3738  | gcvR | Glycine cleavage system transcriptional repressor             |
| G2583_3003             | ECs3342 | Z3739  | bcp  | Putative peroxiredoxin bcp                                    |
| G2583_3004             | ECs3343 | Z3741  | hyfA | Hydrogenase 4 Fe-S subunit                                    |
| G2583_3005             | ECs3344 | Z3742  | hyfB | Hydrogenase 4 membrane subunit                                |
| G2583_3006             | ECs3345 | Z3743  | hyfC | Hydrogenase 4 membrane subunit                                |
| G2583_3007             | ECs3346 | Z3744  | hyfD | Hydrogenase-4 component D                                     |
| G2583_3008             | ECs3347 | Z3745  | hyfE | Hydrogenase-4 component E                                     |
| G2583_3009             | ECs3348 | Z3746  | hyfF | Hydrogenase 4 membrane subunit                                |
| G2583_3010             | ECs3349 | Z3747  | hyfG | Hydrogenase-4, G subunit                                      |
| G2583_3011             | ECs3350 | Z3748  | hyfH | Iron-sulfur cluster-binding protein                           |
| G2583_3012             | ECs3351 | Z3749  | hyfI | Hydrogenase-4, I subunit                                      |
| G2583_3013             | ECs3352 | Z3750  | hyfJ | putative protein processing element                           |
| G2583_3014             | ECs3353 | Z3751  | hyfR | Hydrogenase-4 transcriptional regulator                       |
| G2583_3015             | ECs3354 | Z3753  | focB | Formate/nitrite transporter                                   |
| G2583_3016             | ECs3355 | Z3755  | yfgO | Putative permease perM                                        |
| G2583_3017             | ECs3356 | Z3757  | yfgC | Peptidase, M48 family                                         |
| G2583_3018             | ECs3357 | Z3758  | yfgD | Arsenate reductase                                            |
| G2583_3019             | ECs3358 | Z3759  | hda  | DnaA-homolog protein hda                                      |

Table S10. The orthologue table of the O55 and O157 strains Page 108

| Locus_tag <sup>a</sup> |         |        | Gene | Product                                                           |
|------------------------|---------|--------|------|-------------------------------------------------------------------|
| CB9615                 | Sakai   | EDL933 |      |                                                                   |
| G2583_3020             | ECs3359 | Z3760  | uraA | Uracil permease                                                   |
| G2583_3021             | ECs3360 | Z3761  | upp  | Uracil phosphoribosyltransferase                                  |
| G2583_3022             | ECs3361 | Z3762  | purM | Phosphoribosylformylglycinamide cyclo-ligase                      |
| G2583_3023             | ECs3362 | Z3763  | purN | Phosphoribosylglycinamide formyltransferase 1                     |
| G2583_3024             | ECs3363 | Z3764  | ppk  | Polyphosphate kinase                                              |
| G2583_3025             | ECs3364 | Z3765  | ppx  | exopolyphosphatase                                                |
| G2583_3026             | ECs3365 | Z3766  | yfgF | Putative cytochrome C-type biogenesis protein                     |
| G2583_3027             |         | Z3767  | -    | hypothetical protein                                              |
| G2583_3028             | ECs3366 | Z3768  | yfgG | hypothetical protein                                              |
| G2583_3029             | ECs3367 | Z3769  | yfgH | Uncharacterized lipoprotein yfgH precursor                        |
| G2583_3030             | ECs3368 | Z3770  | yfgI | hypothetical protein                                              |
| G2583_3031             | ECs3369 | Z3771  | guaA | GMP synthase [glutamine-hydrolyzing]                              |
| G2583_3032             | ECs3370 | Z3772  | guaB | Inosine-5'-monophosphate dehydrogenase                            |
| G2583_3033             | ECs3371 | Z3773  | xseA | Exodeoxyribonuclease 7 large subunit                              |
| G2583_3034             | ECs3372 |        | yfgJ | hypothetical protein                                              |
| G2583_3035             | ECs3373 | Z3774  | der  | GTP-binding protein engA                                          |
| G2583_3036             | ECs3374 | Z3775  | yfgL | Outer membrane assembly lipoprotein YfgL                          |
| G2583_3037             | ECs3375 | Z3776  | yfgM | UPF0070 protein yfgM                                              |
| G2583_3038             | ECs3376 | Z3777  | hisS | Histidyl-tRNA synthetase                                          |
| G2583_3039             |         |        | -    | ncRNA                                                             |
| G2583_3040             | ECs3377 | Z3778  | ispG | 4-hydroxy-3-methylbut-2-en-1-yl diphosphate synthase              |
| G2583_3041             | ECs3378 | Z3779  | yfgA | Helix-turn-helix DNA-binding domain protein                       |
| G2583_3042             | ECs3379 | Z3780  | yfgB | Radical SAM enzyme, Cfr family                                    |
| G2583_3043             | ECs3380 | Z3781  | ndk  | Nucleoside diphosphate kinase                                     |
| G2583_3044             | ECs3381 | Z3782  | -    | Putative polyferredoxin                                           |
| G2583_3045             | ECs3382 | Z3783  | ynfH | Putative dimethyl sulfoxide reductase subunit C                   |
| G2583_3046             | ECs3383 | Z3784  | -    | Dimethylsulfoxide reductase, chain B                              |
| G2583_3047             | ECs3384 | Z3785  | dmsA | putative anaerobic dimethyl sulfoxide reductase chain A precursor |
| G2583_3048             | ECs3385 | Z3786  | pbpC | Penicillin-binding protein 1C                                     |
| G2583_3049             | ECs3386 | Z3787  | yfhM | Alpha-2-macroglobulin domain protein                              |
| G2583_3050             | ECs3387 | Z3788  | sseA | Putative thiosulfate sulfurtransferase                            |
| G2583_3051             |         |        | -    | ncRNA                                                             |
| G2583_3052             | ECs3388 | Z3789  | sseB | Enhanced serine sensitivity                                       |
| G2583_3053             | ECs3389 | Z3790  | pepB | Peptidase B                                                       |
| G2583_3054             | ECs3390 | Z3791  | iscX | hypothetical protein                                              |
| G2583_3055             | ECs3391 | Z3792  | fdx  | 2Fe-2S ferredoxin                                                 |
| G2583_3056             | ECs3392 | Z3793  | hscA | Chaperone protein hscA                                            |
| G2583_3057             | ECs3393 | Z3794  | hscB | Fe-S protein assembly co-chaperone HscB                           |
| G2583_3058             | ECs3394 | Z3795  | iscA | Iron-binding protein iscA                                         |
| G2583_3059             | ECs3395 | Z3796  | iscU | NifU-like protein                                                 |
| G2583_3060             | ECs3396 | Z3797  | iscS | Cysteine desulfurase                                              |
| G2583_3061             | ECs3397 | Z3798  | iscR | DNA-binding transcriptional repressor                             |
| G2583_3062             | ECs3398 | Z3799  | trmJ | tRNA (cytidine/uridine-2'-O-)-methyltransferase trmJ              |

Table S10. The orthologue table of the O55 and O157 strains Page 109

| Locus_tag <sup>a</sup> |           |           | Gene | Product                                                                                  |
|------------------------|-----------|-----------|------|------------------------------------------------------------------------------------------|
| CB9615                 | Sakai     | EDL933    |      |                                                                                          |
| G2583_3063             | ECs3399   |           | suhB | Inositol-1-monophosphatase                                                               |
| G2583_3064             | ECs3400   | Z3802     | yfhR | putative enzyme (3.4.-)                                                                  |
| G2583_3065             | ECs3401   | Z3804     | csiE | Transcriptional antiterminator                                                           |
| G2583_3066             | ECs3402   | Z3807     | hcaT | 3-phenylpropionic acid transporter                                                       |
| G2583_3067             | ECs3403   | Z3808     | hcaR | Hca operon transcriptional activator                                                     |
| G2583_3068             | ECs3404   | Z3809     | hcaE | 3-phenylpropionate/cinnamic acid dioxygenase subunit alpha                               |
| G2583_3069             | ECs3405   | Z3810     | hcaF | 3-phenylpropionate/cinnamic acid dioxygenase subunit beta                                |
| G2583_3070             | ECs3406   | Z3811     | hcaC | 3-phenylpropionate/cinnamic acid dioxygenase ferredoxin subunit                          |
| G2583_3071             | ECs3407   | Z3813     | hcaB | 3-phenylpropionate-dihydrodiol/cinnamic acid-dihydrodiol dehydrogenase                   |
| G2583_3072             | ECs3408   | Z3814     | hcaD | 3-phenylpropionate/cinnamic acid dioxygenase ferredoxin--NAD(+) reductase component      |
| G2583_3073             | ECs3409   | Z3815     | yphA | Predicted inner membrane protein                                                         |
| G2583_3074             | ECs3410   | Z3816     | yphB | Aldose 1-epimerase family protein                                                        |
| G2583_3075             | ECs3411   | Z3817     | yphC | Hypothetical zinc-type alcohol dehydrogenase-like protein yphC                           |
| G2583_3075             |           | Z3818     | yphC | Hypothetical zinc-type alcohol dehydrogenase-like protein yphC                           |
| G2583_3076             | ECs3412   | Z3819     | yphD | Putative transport system permease protein                                               |
| G2583_3077             | ECs3413   | Z3821     | yphE | Putative sugar ABC transporter, ATP-binding protein                                      |
| G2583_3078             | ECs3414   | Z3823     | yphF | Periplasmic binding protein/LacI transcriptional regulator precursor                     |
| G2583_3079             | ECs3415   | Z3825     | yphG | hypothetical protein                                                                     |
| G2583_3080             | ECs3416   | Z3826     | yphH | ROK family protein                                                                       |
| G2583_3081             | ECs3417   | Z3827     | glyA | Serine hydroxymethyltransferase                                                          |
| G2583_3082             | ECs3418   | Z3828     | hmp  | Flavoheмоprotein                                                                         |
| G2583_3083             | ECs3419   | Z3829     | glnB | Nitrogen regulatory protein P-II 1                                                       |
| G2583_3084             | ECs3420   | Z3830     | yfhA | putative 2-component transcriptional regulator                                           |
| G2583_3085             | ECs3421   | Z3831     | yfhG | hypothetical protein                                                                     |
| G2583_3086             | ECs3422   | Z3833     | yfhK | putative 2-component sensor protein                                                      |
| G2583_3087             |           |           | -    | ncRNA                                                                                    |
| G2583_3088             | ECs3423   | Z3835     | purL | Phosphoribosylformylglycinamide synthase                                                 |
| G2583_3089             | ECs3424   | Z3838     | yfhD | Predicted soluble lytic transglycosylase fused to an ABC-type amino acid-binding protein |
| G2583_3090             | ECs3425   | Z3839     | tadA | tRNA-specific adenosine deaminase                                                        |
| G2583_3091             | ECs3426   | Z3840     | yfhB | HAD hydrolase YhfB                                                                       |
| G2583_3092             | ECs3427   | Z3841     | yfhH | hypothetical protein                                                                     |
| G2583_3093             | Indel-154 | Indel-154 | -    | hypothetical protein                                                                     |
| G2583_3094             | Indel-154 | Indel-154 | pinE | DNA invertase from prophage CP-933H                                                      |
| G2583_3095             | Indel-154 | Indel-154 | yfdL | putative tail fiber protein                                                              |
| G2583_3096             | Indel-154 | Indel-154 | yfdK | tail fiber assembly protein                                                              |

Table S10. The orthologue table of the O55 and O157 strains Page 110

| Locus_tag <sup>a</sup> |           |           | Gene | Product                                                     |
|------------------------|-----------|-----------|------|-------------------------------------------------------------|
| CB9615                 | Sakai     | EDL933    |      |                                                             |
| G2583_3097             | Indel-154 | Indel-154 | tfaE | hypothetical protein                                        |
| G2583_3098             | Indel-154 | Indel-154 | -    | Phage-related tail fibre protein                            |
| G2583_3099             | Indel-154 | Indel-154 | -    | putative bacteriophage protein                              |
| G2583_3100             | Indel-154 | Indel-154 | -    | Uncharacterized homolog of phage Mu protein gp 47           |
| G2583_3101             | Indel-154 | Indel-154 | -    | putative bacteriophage protein                              |
| G2583_3102             | Indel-154 | Indel-154 | -    | Phage P2 baseplate assembly protein gpV                     |
| G2583_3103             | Indel-154 | Indel-154 | -    | Putative secreted protein precursor                         |
| G2583_3104             | Indel-154 | Indel-154 | -    | hypothetical protein                                        |
| G2583_3105             | Indel-154 | Indel-154 | -    | Putative bacteriophage protein                              |
| G2583_3106             | Indel-154 | Indel-154 | -    | putative bacteriophage protein                              |
| G2583_3107             | Indel-154 | Indel-154 | -    | Putative bacteriophage protein                              |
| G2583_3108             | Indel-154 | Indel-154 | -    | Putative bacteriophage protein                              |
| G2583_3109             | Indel-154 | Indel-154 | -    | Putative bacteriophage protein                              |
| G2583_3110             | Indel-154 | Indel-154 | -    | Hypothetical prophage protein                               |
| G2583_3111             | Indel-154 | Indel-154 | -    | Putative bacteriophage protein                              |
| G2583_3112             | Indel-154 | Indel-154 | -    | Putative bacteriophage protein                              |
| G2583_3113             | Indel-154 | Indel-154 | -    | Putative bacteriophage protein                              |
| G2583_3114             | Indel-154 | Indel-154 | -    | hypothetical protein                                        |
| G2583_3115             | Indel-154 | Indel-154 | -    | Putative bacteriophage protein                              |
| G2583_3116             | Indel-154 | Indel-154 | -    | Putative bacteriophage protein                              |
| G2583_3117             | Indel-154 | Indel-154 | -    | Putative bacteriophage protein                              |
| G2583_3118             | Indel-154 | Indel-154 | -    | Uncharacterized protein conserved in bacteria               |
| G2583_3119             | Indel-154 | Indel-154 | -    | Uncharacterized protein, homolog of phage Mu protein gp30   |
| G2583_3120             | Indel-154 | Indel-154 | -    | Uncharacterized protein conserved in bacteria               |
| G2583_3121             | Indel-154 | Indel-154 | -    | hypothetical protein                                        |
| G2583_3122             | Indel-154 | Indel-154 | -    | Phage terminase, small subunit                              |
| G2583_3123             | Indel-154 | Indel-154 | -    | conserved hypothetical protein                              |
| G2583_3124             | Indel-154 | Indel-154 | -    | Lysozyme                                                    |
| G2583_3125             | Indel-154 | Indel-154 | -    | phage holin, lambda family                                  |
| G2583_3126             | Indel-154 | Indel-154 | -    | hypothetical protein                                        |
| G2583_3127             | Indel-154 | Indel-154 | -    | Transcriptional regulator                                   |
| G2583_3128             | Indel-154 | Indel-154 | -    | Predicted P-loop ATPase and inactivated derivatives         |
| G2583_3129             | Indel-154 | Indel-154 | -    | hypothetical protein                                        |
| G2583_3130             | Indel-154 | Indel-154 | -    | hypothetical protein                                        |
| G2583_3131             | Indel-154 | Indel-154 | -    | hypothetical protein                                        |
| G2583_3132             | Indel-154 | Indel-154 | -    | Bbp38                                                       |
| G2583_3133             | Indel-154 | Indel-154 | -    | hypothetical protein                                        |
| G2583_3134             | Indel-154 | Indel-154 | -    | hypothetical protein                                        |
| G2583_3135             | Indel-154 | Indel-154 | dpoL | DNA polymerase I - 3'→5' exonuclease and polymerase domains |
| G2583_3136             | Indel-154 | Indel-154 | -    | hypothetical protein                                        |
| G2583_3137             | Indel-154 | Indel-154 | -    | Phage associated protein                                    |
| G2583_3138             | Indel-154 | Indel-154 | -    | hypothetical protein                                        |

Table S10. The orthologue table of the O55 and O157 strains Page 111

| Locus_tag <sup>a</sup> |           |           | Gene | Product                                                                |
|------------------------|-----------|-----------|------|------------------------------------------------------------------------|
| CB9615                 | Sakai     | EDL933    |      |                                                                        |
| G2583_3139             | Indel-154 | Indel-154 | -    | Superfamily II DNA/RNA helicases, SNF2 family                          |
| G2583_3140             | Indel-154 | Indel-154 | -    | hypothetical protein                                                   |
| G2583_3141             | Indel-154 | Indel-154 | -    | Integrase                                                              |
| G2583_3142             | ECs3428   | Z3842     | yfhL | hypothetical protein                                                   |
| G2583_3143             |           | Z3843     | -    | hypothetical protein                                                   |
| G2583_3144             | ECs3429   | Z3844     | acpS | Holo-[acyl-carrier-protein] synthase                                   |
| G2583_3145             | ECs3430   | Z3845     | pdxJ | Pyridoxine 5'-phosphate synthase                                       |
| G2583_3146             | ECs3431   | Z3846     | recO | DNA repair protein recO                                                |
| G2583_3147             | ECs3432   | Z3847     | era  | GTP-binding protein era                                                |
| G2583_3148             | ECs3433   | Z3848     | rnc  | Ribonuclease 3                                                         |
| G2583_3149             |           | Z3849     | -    | hypothetical protein                                                   |
| G2583_3150             | ECs3434   | Z3850     | lepB | Signal peptidase I                                                     |
| G2583_3151             | ECs3435   | Z3851     | lepA | GTP-binding protein lepA                                               |
| G2583_3152             | ECs3436   | Z3852     | rseC | Sigma-E factor regulatory protein RseC                                 |
| G2583_3153             | ECs3437   | Z3853     | rseB | Sigma-E factor regulatory protein rseB precursor                       |
| G2583_3154             | ECs3438   | Z3854     | rseA | Sigma-E factor negative regulatory protein                             |
| G2583_3155             | ECs3439   | Z3855     | rpoE | DNA-directed RNA polymerase specialized sigma subunit, sigma24 homolog |
| G2583_3156             | ECs3440   | Z3856     | nadB | L-aspartate oxidase                                                    |
| G2583_3157             | ECs3441   | Z3857     | yfiC | Putative enzyme                                                        |
| G2583_3158             | ECs3442   | Z3859     | srmB | ATP-dependent RNA helicase SrmB                                        |
| G2583_3159             | ECs3443   | Z3860     | yfiE | putative transcriptional regulator LYSR-type                           |
| G2583_3160             | ECs3444   | Z3861     | eamB | Cysteine/O-acetylserine efflux protein                                 |
| G2583_3161             | ECs3445   | Z3862     | yfiD | Autonomous glycyl radical cofactor                                     |
| G2583_3162             | ECs3446   | Z3864     | ung  | Uracil-DNA glycosylase                                                 |
| G2583_3163             | ECs3447   | Z3865     | yfiF | rRNA methylases                                                        |
| G2583_3164             |           | Z3866     | -    | hypothetical protein                                                   |
| G2583_3165             | ECs3448   | Z3867     | trxC | Thioredoxin-2                                                          |
| G2583_3166             | ECs3449   | Z3868     | yfiP | DTW domain protein                                                     |
| G2583_3167             | ECs3450   | Z3869     | yfiQ | CoA binding domain/acetyltransferase domain protein                    |
| G2583_3167             | ECs3451   | Z3869     | yfiQ | CoA binding domain/acetyltransferase domain protein                    |
| G2583_3168             | ECs3452   | Z3870     | pssA | CDP-diacylglycerol--serine O-phosphatidyltransferase                   |
| G2583_3169             | ECs3453   | Z3871     | yfiM | hypothetical protein                                                   |
| G2583_3170             | ECs3454   | Z3872     | kgtP | Alpha-ketoglutarate permease                                           |
| G2583_3171             | rrfG      | RNA065    | rrf  | 5S ribosomal RNA                                                       |
| G2583_3172             | rrlG      | RNA066    | rrl  | 23S ribosomal RNA                                                      |
| G2583_3173             | gltW      | RNA067    | gltW | Glu tRNA                                                               |
| G2583_3174             | rrsG      | RNA068    | rrs  | 16S ribosomal RNA                                                      |
| G2583_3175             | ECs3455   | Z3886     | clpB | Heat shock protein                                                     |
| G2583_3176             | ECs3456   | Z3887     | yfiH | hypothetical protein                                                   |
| G2583_3177             | ECs3457   | Z3888     | rluD | Ribosomal large subunit pseudouridine synthase D                       |
| G2583_3178             | ECs3458   | Z3889     | yfiO | predicted lipoprotein                                                  |
| G2583_3179             | ECs3459   |           | -    | hypothetical protein                                                   |
| G2583_3180             | ECs3460   | Z3890     | raiA | Ribosome-associated inhibitor A                                        |

Table S10. The orthologue table of the O55 and O157 strains Page 112

| Locus_tag <sup>a</sup> |           |           | Gene | Product                                                       |
|------------------------|-----------|-----------|------|---------------------------------------------------------------|
| CB9615                 | Sakai     | EDL933    |      |                                                               |
|                        | ECs3461   |           | -    | leader peptide of chorismate mutase-P-prephenate dehydratase  |
| G2583_3181             | ECs3462   | Z3891     | pheA | P-protein [Includes: Chorismate mutase                        |
| G2583_3182             | ECs3463   | Z3892     | tyrA | Chorismate mutase/prephenate dehydrogenase                    |
| G2583_3183             | ECs3464   | Z3893     | aroF | Phospho-2-dehydro-3-deoxyheptonate aldolase, Tyr-sensitive    |
| G2583_3184             | ECs3465   | Z3895     | yfiL | hypothetical protein                                          |
| G2583_3185             | ECs3466   | Z3897     | yfiR | hypothetical protein                                          |
| G2583_3186             | ECs3467   | Z3898     | yfiN | GGDEF domain protein                                          |
| G2583_3187             | ECs3468   | Z3899     | yfiB | OmpA family protein                                           |
| G2583_3188             | ECs3469   | Z3900     | rplS | 50S ribosomal protein L19                                     |
| G2583_3189             | ECs3470   | Z3901     | trmD | tRNA (guanine-N(1)-)-methyltransferase                        |
| G2583_3190             | ECs3471   | Z3902     | rimM | 16S rRNA-processing protein rimM                              |
| G2583_3191             | ECs3472   | Z3903     | rpsP | 30S ribosomal subunit protein S16                             |
| G2583_3192             | ECs3473   | Z3904     | ffh  | Signal recognition particle protein                           |
| G2583_3193             | ECs3474   | Z3905     | ypjD | hypothetical protein                                          |
| G2583_3194             | ECs3475   | Z3906     | yfjD | CBS/transporter associated domain protein                     |
| G2583_3195             | ECs3476   | Z3907     | grpE | heat shock protein GrpE                                       |
| G2583_3196             | ECs3477   | Z3908     | nadK | Probable inorganic polyphosphate/ATP-NAD kinase               |
| G2583_3197             | ECs3478   | Z3909     | recN | recombination and repair protein                              |
| G2583_3198             | ECs3479   | Z3910     | smpA | Lipoprotein, SmpA/OmlA family                                 |
| G2583_3199             | ECs3480   | Z3911     | yfjF | hypothetical protein                                          |
| G2583_3200             | ECs3481   | Z3912     | yfjG | Polyketide cyclase/dehydrase family protein                   |
| G2583_3201             | ECs3482   | Z3913     | smpB | SsrA-binding protein                                          |
| G2583_3202             | ssrA      | RNA069    | ssrA | tmRNA                                                         |
| G2583_3203             | ECs3483   | Z3916     | -    | DinI-like protein Z3916/ECs3483                               |
|                        | ECs3484   |           | -    | hypothetical protein                                          |
|                        |           | Z3917     | -    | orf, hypothetical protein                                     |
| G2583_3204             | ECs3485   | Z3918     | lpgB | Putative chaperone protein                                    |
| G2583_3205             | ECs3486   | Z3919     | -    | PotB, trcA, ORF2, ORF3, ORF4 genes,                           |
| Indel-155              | ECs3487   | Z3920     | -    | hypothetical protein                                          |
| Indel-155              | ECs3488   | Z3921     | -    | hypothetical protein                                          |
| Indel-156              | ECs3489   | Indel-156 | -    | hypothetical protein                                          |
| Indel-156              | ECs3490   | Indel-156 | -    | putative transposase OrfA protein of insertion sequence IS629 |
| Indel-156              | ECs3491   | Indel-156 | -    | putative transposase OrfB protein of insertion sequence IS629 |
| Indel-156              | ECs3492   | Indel-156 | -    | hypothetical protein                                          |
| Indel-156              | ECs3493   | Indel-156 | -    | hypothetical protein                                          |
| Indel-156              | ECs3494   | Indel-156 | -    | hypothetical protein                                          |
| Indel-156              | ECs3495   | Indel-156 | -    | putative endolysin                                            |
| Indel-156              | ECs3496   | Indel-156 | -    | hypothetical protein                                          |
| Indel-156              | ECs3497   | Indel-156 | -    | holin protein                                                 |
| G2583_3206             | Indel-157 | Indel-157 | -    | conserved hypothetical protein                                |



Table S10. The orthologue table of the O55 and O157 strains Page 113

| Locus_tag <sup>a</sup> |           |           | Gene | Product                                                            |
|------------------------|-----------|-----------|------|--------------------------------------------------------------------|
| CB9615                 | Sakai     | EDL933    |      |                                                                    |
| G2583_3207             | Indel-157 | Indel-157 | -    | hypothetical protein                                               |
| G2583_3208             | Indel-157 | Indel-157 | -    | putative tail fiber protein encoded by prophage CP-                |
| G2583_3209             | Indel-157 | Indel-157 | -    | Opacity protein and related surface antigens                       |
| G2583_3210             | Indel-157 | Indel-157 | -    | Phage-related protein, tail component                              |
| G2583_3211             | Indel-157 | Indel-157 | -    | putative tail assembly protein                                     |
| G2583_3212             | Indel-157 | Indel-157 | -    | Cell wall-associated hydrolases (invasion-associated proteins)     |
| G2583_3213             | Indel-157 | Indel-157 | ant  | Antirepressor protein                                              |
| G2583_3214             | Indel-157 | Indel-157 | -    | hypothetical protein                                               |
| G2583_3215             | Indel-157 | Indel-157 | -    | putative tail fiber component L of prophage CP-933U                |
| G2583_3216             | Indel-157 | Indel-157 | -    | Putative minor tail protein                                        |
| G2583_3217             | Indel-157 | Indel-157 | -    | Phage-related minor tail protein                                   |
| G2583_3218             | Indel-157 | Indel-157 | -    | Gp14                                                               |
| G2583_3219             | Indel-157 | Indel-157 | -    | Putative tail assembly chaperone encoded by prophage CP-933N       |
| G2583_3220             | Indel-157 | Indel-157 | -    | Putative tail component of cryptic prophage CP-933P                |
| G2583_3221             | Indel-157 | Indel-157 | -    | Gp11                                                               |
| G2583_3222             | Indel-157 | Indel-157 | -    | Phage protein, HK97 gp10 family                                    |
| G2583_3223             | Indel-157 | Indel-157 | -    | Bacteriophage head-tail adaptor                                    |
| G2583_3224             | Indel-157 | Indel-157 | -    | unknown protein encoded by cryptic prophage CP-                    |
| G2583_3225             | Indel-157 | Indel-157 | -    | Portal protein (GP3)                                               |
| G2583_3226             | Indel-157 | Indel-157 | -    | Portal protein (GP3)                                               |
| G2583_3227             | Indel-157 | Indel-157 | -    | hypothetical protein                                               |
| G2583_3228             | Indel-157 | Indel-157 | -    | Phage head maturation protease                                     |
| G2583_3229             | Indel-157 | Indel-157 | -    | Phage terminase-like protein, large subunit                        |
| G2583_3230             | Indel-157 | Indel-157 | -    | unknown protein encoded by prophage CP-933N                        |
| G2583_3231             | Indel-157 | Indel-157 | -    | unknown protein encoded by prophage CP-933N                        |
| G2583_3232             | Indel-157 | Indel-157 | ynfO | conserved hypothetical protein                                     |
| G2583_3233             | Indel-157 | Indel-157 | tonB | Partial tonB-like membrane protein encoded within prophage CP-933N |
| G2583_3234             | Indel-157 | Indel-157 | -    | conserved hypothetical protein                                     |
| G2583_3235             | Indel-157 | Indel-157 | -    | Putative endopeptidase Rz                                          |
| G2583_3236             | Indel-157 | Indel-157 | antU | Antirepressor protein                                              |
| G2583_3237             | Indel-157 | Indel-157 | -    | putative endolysin                                                 |
| G2583_3238             | Indel-157 | Indel-157 | -    | hypothetical protein                                               |
| G2583_3239             | Indel-157 | Indel-157 | -    | putative holin protein of prophage CP-933U                         |
| G2583_3240             | Indel-157 | Indel-157 | insN | unknown protein encoded by IS911 within prophage CP-933L           |
| G2583_3241             | Indel-157 | Indel-157 | -    | putative transposase                                               |
| Indel-158              | Indel-158 | Z3922     | -    | putative transposase                                               |
| Indel-158              | Indel-158 | Z3923     | -    | hypothetical protein                                               |
| Indel-158              | Indel-158 | Z3924     | -    | partial putative transposase                                       |
| Indel-158              | Indel-158 | Z3925     | -    | partial putative transposase                                       |
| G2583_3242             | ECs3498   | Z3926     | -    | YjhS                                                               |

Table S10. The orthologue table of the O55 and O157 strains Page 114

| Locus_tag <sup>a</sup> |           |           | Gene   | Product                                                     |
|------------------------|-----------|-----------|--------|-------------------------------------------------------------|
| CB9615                 | Sakai     | EDL933    |        |                                                             |
| G2583_3242             | ECs3498   | Z3927     | -      | YjhS                                                        |
| Indel-159              | ECs3499   |           | -      | hypothetical protein                                        |
| Indel-159              |           | Z3929     | -      | unknown protein encoded by prophage CP-933Y                 |
| Indel-159              | ECs3500   | Z3931     | -      | hypothetical membrane protein                               |
| Indel-159              | ECs3501   | Z3932     | -      | putative antitermination protein                            |
| Indel-159              | ECs3502   | Z3933     | -      | putative serine/threonine protein phosphatase               |
| Indel-159              | ECs3503   | Z3934     | -      | hypothetical protein                                        |
| Indel-159              | ECs3504   | Z3935     | -      | hypothetical protein                                        |
|                        | ECs3505   | Z3936     | tra8_3 | transposase of insertion sequence IS30                      |
| G2583_3243             | Indel-160 | Indel-160 | -      | hypothetical protein                                        |
| G2583_3244             | Indel-160 | Indel-160 | -      | unknown protein encoded within prophage CP-933R             |
| G2583_3245             | Indel-160 | Indel-160 | -      | DNA modification methylase                                  |
| G2583_3246             | Indel-160 | Indel-160 | ybcQ   | Antitermination protein Q                                   |
| G2583_3247             | Indel-160 | Indel-160 | ninH   | hypothetical protein                                        |
| G2583_3248             | Indel-160 | Indel-160 | NinG   | protein ninG                                                |
| G2583_3249             | Indel-160 | Indel-160 | roi    | hypothetical protein                                        |
| G2583_3250             | Indel-160 | Indel-160 | ant    | Putative antirepressor                                      |
| G2583_3251             | Indel-160 | Indel-160 | ninE   | hypothetical protein                                        |
| G2583_3252             | Indel-160 | Indel-160 | -      | Putative DNA N-6-adenine-methyltransferase of bacteriophage |
| G2583_3253             | Indel-160 | Indel-160 | ninB   | hypothetical protein                                        |
| G2583_3254             | Indel-160 | Indel-160 | -      | Ren protein                                                 |
| G2583_3255             | Indel-160 | Indel-160 | -      | P protein                                                   |
| G2583_3256             | Indel-160 | Indel-160 | -      | phage replication protein O                                 |
| G2583_3257             | Indel-160 | Indel-160 | -      | CII protein                                                 |
| G2583_3258             | Indel-160 | Indel-160 | cro    | Cro                                                         |
| G2583_3259             | Indel-160 | Indel-160 | ymfK   | P22 repressor protein c2                                    |
| G2583_3260             | Indel-160 | Indel-160 | -      | hypothetical lipoprotein                                    |
| G2583_3261             | Indel-160 | Indel-160 | -      | hypothetical protein                                        |
| G2583_3262             | Indel-160 | Indel-160 | -      | Gp45                                                        |
| G2583_3263             | Indel-160 | Indel-160 | -      | Lambda prophage-derived protein ea10                        |
| G2583_3264             | Indel-160 | Indel-160 | CIII   | Lambda phage regulatory protein CIII                        |
| G2583_3265             | Indel-160 | Indel-160 | kilW   | putative Kil protein of bacteriophage BP-933W               |
| G2583_3266             | Indel-160 | Indel-160 | bet    | Recombination protein Bet                                   |
| G2583_3267             | Indel-160 | Indel-160 | -      | Putative exonuclease encoded by prophage CP-933K            |
| G2583_3268             | Indel-160 | Indel-160 | -      | hypothetical protein                                        |
| G2583_3269             | Indel-160 | Indel-160 | -      | hypothetical protein                                        |
| G2583_3270             | Indel-160 | Indel-160 | -      | hypothetical protein                                        |
| G2583_3271             | Indel-160 | Indel-160 | -      | C4-type zinc finger protein                                 |
| G2583_3272             | Indel-160 | Indel-160 | -      | Enterohemolysin 2                                           |
| G2583_3273             | Indel-160 | Indel-160 | -      | Valyl-tRNA synthetase                                       |
| G2583_3274             | Indel-160 | Indel-160 | -      | hypothetical protein                                        |
| G2583_3275             | Indel-160 | Indel-160 | -      | Putative bacteriophage protein                              |
| G2583_3276             | Indel-160 | Indel-160 | -      | hypothetical protein                                        |

Table S10. The orthologue table of the O55 and O157 strains Page 115

| Locus_tag <sup>a</sup> |           |           | Gene | Product                                              |
|------------------------|-----------|-----------|------|------------------------------------------------------|
| CB9615                 | Sakai     | EDL933    |      |                                                      |
| G2583_3277             | Indel-160 | Indel-160 | -    | hypothetical protein                                 |
| G2583_3278             | Indel-160 | Indel-160 | intA | phage integrase family protein                       |
| G2583_3279             | Indel-160 | Indel-160 | -    | hypothetical protein                                 |
| G2583_3280             | Indel-160 | Indel-160 | -    | hypothetical protein                                 |
| G2583_3281             | Indel-160 | Indel-160 | -    | hypothetical protein                                 |
| G2583_3282             | Indel-160 | Indel-160 | -    | hypothetical protein                                 |
| G2583_3283             | Indel-160 | Indel-160 | -    | hypothetical protein                                 |
| G2583_3284             | Indel-160 | Indel-160 | intA | Prophage integrase                                   |
| G2583_3285             | Indel-160 | Indel-160 | -    | conserved hypothetical protein                       |
| G2583_3286             | Indel-160 | Indel-160 | -    | Hypothetical purine NTPase                           |
| G2583_3287             | Indel-160 | Indel-160 | -    | hypothetical protein                                 |
| G2583_3288             | Indel-160 | Indel-160 | -    | hypothetical protein                                 |
| G2583_3289             | Indel-160 | Indel-160 | -    | hypothetical protein                                 |
| G2583_3290             | ECs3506   | Z3937     | -    | hypothetical protein                                 |
|                        |           | Z3938     | -    | hypothetical protein                                 |
| G2583_3291             | ECs3507   | Z3939     | -    | hypothetical protein                                 |
| G2583_3292             | ECs3508   | Z3940     | -    | hypothetical protein                                 |
| G2583_3293             | ECs3509   | Z3941     | -    | hypothetical protein                                 |
| G2583_3294             | ECs3510   | Z3942     | -    | Conserved DNA-binding protein                        |
| G2583_3295             | ECs3511   | Z3943     | -    | Site-specific recombinase, phage integrase family    |
| G2583_3296             | ECs3512   | Z3945     | -    | Putative site specific recombinase                   |
| G2583_3297             | ECs3513   | Z3946     | alpA | Putative DNA binding protein                         |
| G2583_3298             | ECs3514   | Z3947     | -    | hypothetical protein                                 |
| G2583_3299             | ECs3515   | Z3948     | ypjA | putative ATP-binding component of a transport system |
| G2583_3300             | ECs3516   | Z3949     | -    | Putative DNA-invertase from prophage CP4-44          |
| G2583_3301             | ECs3517   | Z3950     | ypjB | hypothetical protein                                 |
| G2583_3302             |           | Z3951     | -    | hypothetical protein                                 |
| G2583_3303             | ileY      | RNA070    | ileY | Met tRNA                                             |
| G2583_3304             | ECs3518   | Z3954     | ygaR | hypothetical protein                                 |
| G2583_3304             | ECs3519   | Z3955     | ygaR | hypothetical protein                                 |
| G2583_3305             | ECs3520   | Z3956     | csiD | alpha amylase family protein                         |
| G2583_3306             | ECs3521   | Z3958     | ygaF | hypothetical protein                                 |
| G2583_3307             | ECs3522   | Z3959     | gabD | Succinate-semialdehyde dehydrogenase (NAD(P)(+))     |
| G2583_3308             | ECs3523   | Z3960     | gabT | 4-aminobutyrate transaminase                         |
| G2583_3309             | ECs3524   | Z3961     | gabP | GABA permease                                        |
|                        |           | Z3962     | -    | hypothetical protein                                 |
| G2583_3310             | ECs3525   | Z3963     | csiR | DNA-binding transcriptional regulator CsiR           |
| G2583_3311             | ECs3526   | Z3964     | ygaU | Phospholipid-binding protein                         |
| G2583_3312             | ECs3527   | Z3965     | yqaE | UPF0057 membrane protein yqaE                        |
| G2583_3313             | ECs3528   | Z3966     | ygaV | hypothetical protein                                 |
| G2583_3314             | ECs3529   | Z3967     | ygaP | hypothetical protein                                 |
| G2583_3315             | ECs3530   | Z3968     | stpA | DNA-binding protein H-NS                             |
| G2583_3316             | ECs3531   | Z3970     | ygaW | hypothetical protein                                 |
| G2583_3317             | ECs3532   | Z3971     | ygaC | hypothetical protein                                 |

Table S10. The orthologue table of the O55 and O157 strains Page 116

| Locus_tag <sup>a</sup> |         |        | Gene | Product                                                        |
|------------------------|---------|--------|------|----------------------------------------------------------------|
| CB9615                 | Sakai   | EDL933 |      |                                                                |
| G2583_3318             | ECs3533 | Z3972  | ygaM | hypothetical protein                                           |
| G2583_3319             | ECs3534 | Z3973  | -    | transcriptional regulator, GntR family                         |
| G2583_3320             | ECs3535 | Z3974  | -    | Carboxymuconolactone decarboxylase family protein              |
| G2583_3321             | ECs3536 | Z3975  | nrdH | Glutaredoxin-like protein nrdH                                 |
| G2583_3322             | ECs3537 | Z3976  | nrdI | ribonucleotide reductase stimulatory protein                   |
| G2583_3323             | ECs3538 | Z3977  | nrdE | Ribonucleoside-diphosphate reductase, alpha subunit            |
| G2583_3324             | ECs3539 | Z3978  | nrdF | Ribonucleoside-diphosphate reductase 2 subunit beta            |
| G2583_3325             | ECs3540 | Z3979  | proV | ATP-binding component of transport system                      |
| G2583_3326             | ECs3541 | Z3980  | proW | Glycine betaine/L-proline ABC transporter, permease protein    |
| G2583_3327             | ECs3542 | Z3981  | proX | Glycine betaine-binding periplasmic protein precursor          |
| G2583_3328             | ECs3543 | Z3982  | ygaX | Putative transport protein                                     |
| G2583_3329             | ECs3544 | Z3983  | ygaZ | Transporter, branched chain amino acid exporter (LIV-E) family |
| G2583_3330             | ECs3545 | Z3984  | ygaH | predicted inner membrane protein                               |
| G2583_3331             | ECs3546 | Z3985  | mprA | transcriptional repressor MprA                                 |
| G2583_3332             | ECs3547 | Z3986  | emrA | Multidrug resistance protein A                                 |
| G2583_3333             | ECs3548 | Z3987  | emrB | Probably membrane translocase                                  |
| G2583_3334             | ECs3549 | Z3988  | luxS | S-ribosylhomocysteine lyase                                    |
| G2583_3335             |         |        | sraD | ncRNA                                                          |
| G2583_3336             | ECs3550 | Z3989  | gshA | Glutamate--cysteine ligase                                     |
| G2583_3337             | ECs3551 | Z3990  | yqaA | hypothetical protein                                           |
| G2583_3338             | ECs3552 | Z3991  | yqaB | HAD-superfamily hydrolase, subfamily IA                        |
| G2583_3339             | argQ    | RNA071 | argQ | Arg tRNA                                                       |
| G2583_3340             | argZ    | RNA072 | argZ | Arg tRNA                                                       |
| G2583_3341             | argY    | RNA073 | argY | Arg tRNA                                                       |
| G2583_3342             | argV    | RNA074 | argV | Arg tRNA                                                       |
| G2583_3343             | serV    | RNA075 | serV | Ser tRNA                                                       |
| G2583_3344             | ECs3553 | Z3998  | csrA | Carbon storage regulator homolog                               |
| G2583_3345             | ECs3554 | Z3999  | alaS | Alanyl-tRNA synthetase                                         |
|                        |         | Z4000  | -    | hypothetical protein                                           |
| G2583_3346             | ECs3555 | Z4001  | recX | regulatory protein RecX                                        |
| G2583_3347             | ECs3556 | Z4002  | recA | RecA/GFP fusion protein                                        |
| G2583_3348             | ECs3557 | Z4003  | ygaD | Competence/damage-inducible protein CinA domain protein        |
| G2583_3349             | ECs3558 | Z4004  | mltB | Membrane-bound lytic murein transglycosylase B                 |
| G2583_3350             | ECs3559 | Z4005  | srIA | Glucitol/sorbitol permease IIC component                       |
| G2583_3350             | ECsp018 | Z4006  | srIA | Glucitol/sorbitol permease IIC component                       |
| G2583_3351             |         | Z4007  | srIE | Phosphotransferase system sorbitol-specific component IIBC     |
| G2583_3351             | ECsp019 | Z4009  | srIE | Phosphotransferase system sorbitol-specific component IIBC     |
| G2583_3352             | ECs3560 | Z4011  | srIB | sorbitol-6-phosphate dehydrogenase                             |
| G2583_3353             | ECs3561 | Z4012  | srID | Sorbitol-6-phosphate 2-dehydrogenase                           |

Table S10. The orthologue table of the O55 and O157 strains Page 117

| Locus_tag <sup>a</sup> |         |        | Gene | Product                                                                          |
|------------------------|---------|--------|------|----------------------------------------------------------------------------------|
| CB9615                 | Sakai   | EDL933 |      |                                                                                  |
| G2583_3354             | ECs3562 | Z4013  | gutM | Glucitol operon activator protein                                                |
| G2583_3355             | ECs3563 | Z4014  | srIR | Glucitol operon repressor                                                        |
| G2583_3356             | ECs3564 | Z4015  | gutQ | D-arabinose 5-phosphate isomerase                                                |
| G2583_3357             | ECs3565 | Z4017  | norR | Anaerobic nitric oxide reductase transcription regulator<br>norR                 |
| G2583_3358             | ECs3566 | Z4018  | norV | Uncharacterized flavoproteins                                                    |
| G2583_3359             | ECs3567 | Z4019  | norW | Nitric oxide reductase FIRd-NAD(+) reductase                                     |
| G2583_3360             | ECs3568 | Z4020  | hypF | Carbamoyltransferase HypF                                                        |
| G2583_3361             | ECs3569 | Z4021  | hydN | Electron transport protein hydN                                                  |
| G2583_3362             | ECs3570 | Z4022  | ascG | transcriptional regulator AscG                                                   |
| G2583_3363             | ECs3571 | Z4023  | ascF | PTS system enzyme II ABC (Asc), cryptic, transports<br>specific beta- glucosides |
| G2583_3364             | ECs3572 | Z4024  | ascB | 6-phospho-beta-glucosidase                                                       |
| G2583_3365             | ECs3573 | Z4025  | hycl | Hydrogenase 3 maturation protease                                                |
| G2583_3366             | ECs3574 | Z4026  | hycH | Formate hydrogenlyase maturation protein hycH                                    |
| G2583_3367             | ECs3575 | Z4027  | hycG | Formate hydrogenlyase, subunit G                                                 |
| G2583_3368             | ECs3576 | Z4028  | hycF | Formate hydrogenlyase, subunit F                                                 |
| G2583_3369             | ECs3577 | Z4029  | hycE | Formate hydrogenlyase, subunit E                                                 |
| G2583_3370             | ECs3578 | Z4030  | hycD | Membrane-spanning protein of hydrogenase 3                                       |
| G2583_3371             | ECs3579 | Z4031  | hycC | Formate hydrogenlyase, subunit C                                                 |
| G2583_3372             | ECs3580 | Z4032  | hycB | Formate hydrogenlyase, subunit B                                                 |
| G2583_3373             | ECs3581 | Z4033  | hycA | Formate hydrogenlyase regulatory protein hycA                                    |
| G2583_3374             |         | Z4034  | -    | hypothetical protein                                                             |
| G2583_3375             | ECs3582 | Z4035  | hypA | Hydrogenase nickel insertion protein HypA                                        |
| G2583_3376             | ECs3583 | Z4036  | hypB | Hydrogenase isoenzymes nickel incorporation protein<br>hypB                      |
| G2583_3377             | ECs3584 | Z4037  | hypC | Hydrogenase isoenzymes formation protein hypC                                    |
| G2583_3378             | ECs3585 | Z4038  | hypD | Hydrogenase expression/formation protein HypD                                    |
| G2583_3379             | ECs3586 | Z4039  | hypE | Hydrogenase maturation factor                                                    |
| G2583_3380             | ECs3587 | Z4040  | fhlA | Formate hydrogenlyase transcriptional activator                                  |
| G2583_3381             | ECs3588 | Z4041  | ygbA | hypothetical protein                                                             |
| G2583_3382             |         | Z4042  | -    | hypothetical protein                                                             |
| G2583_3383             | ECs3589 | Z4043  | mutS | DNA mismatch repair protein mutS                                                 |
| G2583_3384             | ECs3590 | Z4044  | pphB | O218 protein                                                                     |
| G2583_3385             | ECs3591 | Z4045  | kpdD | 4-hydroxybenzoate decarboxylase, subunit D                                       |
| G2583_3386             | ECs3592 | Z4046  | kpdC | YclC protein                                                                     |
| G2583_3387             | ECs3593 | Z4047  | padI | Probable aromatic acid decarboxylase                                             |
| G2583_3388             | ECs3594 | Z4048  | -    | putative regulator                                                               |
| G2583_3389             | ECs3595 | Z4049  | rpoS | RNA polymerase sigma factor                                                      |
| G2583_3390             | ECs3596 | Z4050  | nlpD | Lipoprotein                                                                      |
| G2583_3391             | ECs3597 | Z4051  | pcm  | Protein-L-isoaspartate O-methyltransferase                                       |
| G2583_3392             | ECs3598 | Z4052  | surE | Multifunctional protein surE [Includes: 5'/3'-nucleotidase                       |
| G2583_3393             | ECs3599 | Z4053  | truD | tRNA pseudouridine synthase D                                                    |
| G2583_3394             | ECs3600 | Z4054  | ispF | 2-C-methyl-D-erythritol 2,4-cyclodiphosphate synthase                            |

Table S10. The orthologue table of the O55 and O157 strains Page 118

| Locus_tag <sup>a</sup> |         |        | Gene  | Product                                                |
|------------------------|---------|--------|-------|--------------------------------------------------------|
| CB9615                 | Sakai   | EDL933 |       |                                                        |
| G2583_3395             | ECs3601 | Z4055  | ispD  | 2-C-methyl-D-erythritol 4-phosphate cytidyltransferase |
| G2583_3396             | ECs3602 | Z4056  | ftsB  | Cell division protein ftsB homolog                     |
| G2583_3397             | ECs3603 | Z4057  | ygbE  | hypothetical protein                                   |
| G2583_3398             | ECs3604 | Z4058  | cysC  | Adenylyl-sulfate kinase                                |
| G2583_3399             | ECs3605 | Z4059  | cysN  | Sulfate adenylyltransferase subunit 1                  |
| G2583_3400             | ECs3606 | Z4060  | cysD  | Sulfate adenylyltransferase subunit 2                  |
| G2583_3401             | ECs3607 | Z4061  | iap   | Alkaline phosphatase isozyme conversion peptidase      |
| G2583_3402             | ECs3608 | Z4062  | ygbF  | CRISPR-associated protein Cas2                         |
| G2583_3403             | ECs3609 | Z4064  | ygbT  | CRISPR-associated protein Cas1                         |
| G2583_3404             | ECs3610 | Z4065  | cse   | CRISPR-associated protein, Cse3 family                 |
| G2583_3405             | ECs3611 | Z4066  | ygcl  | CRISPR-associated protein Cas5                         |
| G2583_3406             | ECs3612 | Z4067  | ycgJ  | CRISPR-associated protein, Cse4 family                 |
| G2583_3407             | ECs3613 | Z4068  | cse   | CRISPR-associated protein, Cse2 family                 |
| G2583_3408             | ECs3614 | Z4069  | ygcl  | CRISPR-associated protein, Cse1 family                 |
| G2583_3409             | ECs3615 | Z4070  | ycgB  | CRISPR-associated helicase Cas3                        |
| G2583_3410             | ECs3616 | Z4071  | small | Small toxic membrane polypeptide                       |
| G2583_3411             |         |        | -     | ncRNA                                                  |
| G2583_3412             | ECs3617 | Z4072  | cysH  | Phosphoadenosine phosphosulfate reductase              |
| G2583_3413             | ECs3618 | Z4073  | cysI  | Sulfite reductase [NADPH] hemoprotein beta-            |
| G2583_3414             | ECs3619 | Z4074  | cysJ  | Sulfite reductase [NADPH] flavoprotein alpha-          |
| G2583_3415             | ECs3620 | Z4075  | sscR  | Putative 6-pyruvoyl tetrahydrobiopterin synthase       |
| G2583_3416             | ECs3621 | Z4076  | ycgN  | hypothetical protein                                   |
| G2583_3417             | ECs3622 | Z4077  | ycgO  | hypothetical protein                                   |
| G2583_3418             | ECs3623 | Z4078  | ycgP  | Glycerol-3-phosphate responsive antiterminator         |
| G2583_3419             | ECs3624 | Z4079  | ycgQ  | Electron transfer flavoprotein                         |
| G2583_3419             | ECs3625 | Z4080  | ycgQ  | Electron transfer flavoprotein                         |
| G2583_3420             | ECs3626 | Z4081  | ycgR  | Electron transfer flavoprotein                         |
| G2583_3421             | ECs3627 | Z4082  | ycgS  | Permease (major facilitator superfamily)               |
| G2583_3421             | ECs3628 | Z4083  | ycgS  | Permease (major facilitator superfamily)               |
| G2583_3422             | ECs3629 | Z4084  | ycgU  | Uncharacterized flavoprotein ycgU                      |
| G2583_3423             | ECs3630 | Z4085  | ycgW  | Hypothetical oxidoreductase ycgW                       |
| G2583_3424             | ECs3631 | Z4086  | yqcE  | putative transport protein                             |
| G2583_3425             | ECs3632 | Z4087  | ycgE  | Carbohydrate kinase, FGGY family protein               |
|                        |         | Z4088  | -     | hypothetical protein                                   |
| G2583_3426             | ECs3633 | Z4089  | ycgF  | hypothetical protein                                   |
| G2583_3427             | ECs3634 | Z4090  | LemA  | LemA family protein                                    |
| G2583_3428             | ECs3635 | Z4091  | -     | hypothetical protein                                   |
|                        | ECs3636 |        | -     | hypothetical protein                                   |
| G2583_3429             | ECs3637 | Z4092  | -     | hypothetical protein                                   |
| G2583_3430             | ECs3638 | Z4093  | ycgG  | hypothetical protein                                   |
| G2583_3431             | ECs3639 | Z4094  | eno   | Enolase                                                |
| G2583_3432             | ECs3640 | Z4095  | pyrG  | CTP synthase                                           |
| G2583_3433             | ECs3641 | Z4096  | mazG  | Nucleoside triphosphate pyrophosphohydrolase           |
| G2583_3434             | ECs3642 | Z4097  | chpA  | PemK-like protein 1                                    |

Table S10. The orthologue table of the O55 and O157 strains Page 119

| Locus_tag <sup>a</sup> |         |        | Gene | Product                                           |
|------------------------|---------|--------|------|---------------------------------------------------|
| CB9615                 | Sakai   | EDL933 |      |                                                   |
| G2583_3435             | ECs3643 | Z4098  | chpR | PemI-like protein 1                               |
| G2583_3436             | ECs3644 | Z4099  | relA | GTP diphosphokinase                               |
| G2583_3437             | ECs3645 | Z4100  | rumA | 23S rRNA (uracil-5-)-methyltransferase rumA       |
| G2583_3438             | ECs3646 | Z4101  | barA | Signal transduction histidine-protein kinase barA |
| G2583_3439             | ECs3647 | Z4102  | gudD | Glucarate dehydratase                             |
| G2583_3440             | ECs3648 | Z4103  | gudX | Glucarate dehydratase                             |
| G2583_3440             |         | Z4104  | gudX | Glucarate dehydratase                             |
| G2583_3441             | ECs3649 | Z4105  | gudP | Glucarate permease                                |
| G2583_3442             | ECs3650 | Z4106  | yqcA | flavodoxin                                        |
| G2583_3443             | ECs3651 | Z4107  | truC | tRNA pseudouridine synthase C                     |
| G2583_3444             | ECs3652 | Z4108  | yqcC | hypothetical protein                              |
| G2583_3445             | csrB    |        | csrB | ncRNA                                             |
| G2583_3446             | ECs3653 | Z4110  | syd  | SecY interacting protein Syd                      |
| G2583_3447             | ECs3654 | Z4111  | queF | NADPH-dependent 7-cyano-7-deazaguanine reductase  |
| G2583_3448             | ECs3655 | Z4112  | ygdH | hypothetical protein                              |
| G2583_3449             | ECs3656 | Z4113  | sdaC | Serine transporter family protein                 |
| G2583_3450             | ECs3657 | Z4114  | sdaB | L-serine ammonia-lyase 2                          |
| G2583_3451             | ECs3658 | Z4115  | xni  | Uncharacterized exonuclease xni                   |
| G2583_3452             | ECs3659 | Z4116  | fucO | Lactaldehyde reductase                            |
| G2583_3453             | ECs3660 | Z4117  | fucA | L-fuculose phosphate aldolase                     |
| G2583_3454             | ECs3661 | Z4118  | fucP | L-fucose:H <sup>+</sup> symporter permease        |
| G2583_3455             | ECs3662 | Z4119  | fucl | L-fucose isomerase                                |
| G2583_3456             | ECs3663 | Z4120  | fucK | L-fuculokinase                                    |
| G2583_3457             | ECs3664 | Z4121  | fucU | Fucose operon fucU protein                        |
| G2583_3458             | ECs3665 | Z4122  | fucR | L-fucose operon activator                         |
| G2583_3459             | ECs3666 | Z4123  | ygdE | Putative RNA 2'-O-ribose methyltransferase ygdE   |
| G2583_3460             | ECs3667 | Z4124  | ygdD | UPF0382 inner membrane protein ygdD               |
| G2583_3461             | ECs3668 | Z4125  | gcvA | Glycine cleavage system transcriptional activator |
| G2583_3462             | gcvB    |        | gcvB | ncRNA                                             |
| G2583_3463             | ECs3669 | Z4126  | ygdI | hypothetical protein                              |
| G2583_3464             | ECs3670 | Z4127  | csdA | Cysteine desulfurase, catalytic subunit CsdA      |
| G2583_3465             | ECs3671 | Z4128  | csdE | Uncharacterized sufE-like protein ygdK            |
| G2583_3466             | ECs3672 | Z4129  | ygdL | Putative enzyme                                   |
| G2583_3467             | ECs3673 | Z4130  | mltA | Membrane-bound lytic murein transglycosylase A    |
| G2583_3468             | metZ    | RNA076 | metZ | Met tRNA                                          |
| G2583_3469             | metW    | RNA077 | metW | Met tRNA                                          |
| G2583_3470             | metV    | RNA078 | metV | Met tRNA                                          |
| G2583_3471             | ECs3674 | Z4134  | amiC | Putative amidase                                  |
| G2583_3472             | ECs3675 | Z4135  | argA | Amino-acid acetyltransferase                      |
| G2583_3473             | ECs3676 | Z4136  | recD | Exodeoxyribonuclease V, alpha subunit             |
| G2583_3474             | ECs3677 | Z4137  | recB | Exodeoxyribonuclease V, beta subunit              |
| G2583_3475             | ECs3678 | Z4138  | ptrA | Protease III                                      |
| G2583_3476             | ECs3679 | Z4139  | recC | Exodeoxyribonuclease V, gamma subunit             |
| G2583_3477             | ECs3680 | Z4140  | ppdC | Prepilin peptidase-dependent protein C            |

Table S10. The orthologue table of the O55 and O157 strains Page 120

| Locus_tag <sup>a</sup> |         |        | Gene | Product                                                         |
|------------------------|---------|--------|------|-----------------------------------------------------------------|
| CB9615                 | Sakai   | EDL933 |      |                                                                 |
| G2583_3478             | ECs3681 | Z4141  | ygdB | hypothetical protein                                            |
| G2583_3479             | ECs3682 | Z4142  | ppdB | Prepilin peptidase dependent protein B                          |
| G2583_3480             | ECs3683 | Z4143  | ppdA | Prepilin peptidase-dependent protein A                          |
| G2583_3481             | ECs3684 | Z4144  | thyA | Thymidylate synthase                                            |
| G2583_3482             | ECs3685 | Z4145  | lgt  | Prolipoprotein diacylglyceryl transferase                       |
| G2583_3483             | ECs3686 | Z4146  | ptsP | Phosphoenolpyruvate-protein phosphotransferase                  |
| G2583_3484             | ECs3687 | Z4147  | nudH | RNA pyrophosphohydrolase                                        |
| G2583_3485             |         | Z4148  | ygdT | hypothetical protein                                            |
| G2583_3486             | ECs3688 | Z4149  | mutH | DNA mismatch repair protein mutH                                |
| G2583_3487             | ECs3689 | Z4150  | ygdQ | UPF0053 inner membrane protein ygdQ                             |
| G2583_3488             | ECs3690 | Z4151  | ygdR | Uncharacterized lipoprotein ygdR precursor                      |
| G2583_3489             | ECs3691 | Z4152  | tas  | predicted oxidoreductase, NADP(H)-dependent aldo-keto reductase |
| G2583_3490             | ECs3692 | Z4153  | lpIT | hypothetical protein                                            |
| G2583_3491             | ECs3693 | Z4154  | aas  | 2-acyl-glycerophospho-ethanolamine acyltransferase              |
| G2583_3492             |         |        | -    | ncRNA                                                           |
| G2583_3493             |         |        | -    | ncRNA                                                           |
| G2583_3494             | ECs3694 | Z4155  | galR | DNA-binding transcriptional repressor                           |
| G2583_3495             | ECs3695 | Z4156  | lysA | Diaminopimelate decarboxylase                                   |
| G2583_3496             | ECs3696 | Z4157  | lysR | DNA-binding transcriptional regulator LysR                      |
| G2583_3497             | ECs3697 | Z4160  | ygeA | Putative resistance proteins                                    |
| G2583_3498             | ECs3698 | Z4161  | araE | Arabinose-proton symporter                                      |
| G2583_3499             | ECs3699 | Z4162  | kduD | 2-deoxy-D-gluconate 3-dehydrogenase                             |
| G2583_3500             | ECs3700 | Z4163  | kduI | 4-deoxy-L-threo-5-hexosulose-uronate ketol-isomerase            |
| G2583_3501             | ECs3701 | Z4164  | yqeF | Acetyl-CoA acetyltransferase                                    |
| G2583_3502             | ECs3702 | Z4165  | yqeG | putative transporter protein                                    |
| G2583_3503             | ECs3703 | Z4166  | yqeH | hypothetical protein                                            |
| G2583_3504             | ECs3704 | Z4167  | yqeI | putative sensory transducer                                     |
| G2583_3505             | ECs3705 | Z4168  | yqeJ | hypothetical protein                                            |
| G2583_3506             | ECs3706 | Z4169  | yqeK | hypothetical protein                                            |
| G2583_3507             |         | Z4170  | -    | hypothetical protein                                            |
| G2583_3508             | ECs3707 | Z4171  | ygeF | hypothetical protein                                            |
| G2583_3509             | ECs3708 | Z4172  | ygeG | Tetratricopeptide repeat protein                                |
| G2583_3510             |         |        | ygeH | transcriptional regulatory protein                              |
| Indel-167              | ECs3709 | Z4173  | ygeH | putative invasion protein                                       |
| Indel-167              | ECs3710 | Z4174  | -    | hypothetical protein                                            |
| Indel-167              | ECs3711 | Z4175  | -    | hypothetical protein                                            |
| Indel-167              | ECs3712 | Z4176  | -    | hypothetical protein                                            |
| Indel-167              |         | Z4177  | -    | hypothetical protein                                            |
| Indel-167              | ECs3713 | Z4178  | -    | hypothetical protein                                            |
| Indel-167              | ECs3714 | Z4179  | -    | hypothetical protein                                            |
| Indel-167              | ECs3715 |        | -    | hypothetical protein                                            |
| Indel-167              | ECs3716 | Z4180  | -    | type III secretion system lipoprotein precursor EprK            |
| Indel-167              | ECs3717 | Z4181  | -    | type III secretion protein EprJ                                 |



Table S10. The orthologue table of the O55 and O157 strains Page 121

| Locus_tag <sup>a</sup> |         |        | Gene | Product                                                        |
|------------------------|---------|--------|------|----------------------------------------------------------------|
| CB9615                 | Sakai   | EDL933 |      |                                                                |
| Indel-167              | ECs3718 |        | -    | type III secretion protein EprI                                |
| Indel-167              | ECs3719 | Z4182  | -    | type III secretion protein EprH                                |
| Indel-167              |         | Z4183  | -    | hypothetical protein                                           |
| Indel-167              | ECs3720 | Z4184  | -    | putative transcriptional regulator                             |
| Indel-167              | ECs3721 | Z4185  | -    | type III secretion protein EprS                                |
| Indel-167              | ECs3722 | Z4186  | -    | type III secretion protein EpaR2                               |
| Indel-167              | ECs3723 | Z4187  | -    | type III secretion protein EpaR1                               |
| Indel-167              | ECs3724 | Z4188  | -    | type III secretion protein EpaQ                                |
| Indel-167              | ECs3725 | Z4189  | -    | type III secretion protein EpaP                                |
| Indel-167              | ECs3726 | Z4190  | -    | type III secretion protein EpaO                                |
| Indel-167              | ECs3727 | Z4191  | -    | type III secretion protein EivJ                                |
| Indel-167              | ECs3728 | Z4192  | -    | hypothetical protein                                           |
| Indel-167              | ECs3729 | Z4193  | -    | type III secretion protein EivI                                |
| Indel-167              | ECs3730 | Z4194  | -    | type III secretion protein ATP synthetase EivC                 |
| G2583_3511             | ECs3730 | Z4194  | -    | flagellum-specific ATP synthase                                |
| G2583_3512             | ECs3731 | Z4195  | EivA | Type III secretion apparatus protein                           |
| G2583_3513             | ECs3732 | Z4196  | EivE | Putative secreted protein                                      |
| G2583_3514             | ECs3733 | Z4197  | EivG | Putative type III secretion apparatus protein                  |
| G2583_3515             | ECs3734 | Z4198  | invF | Putative type III secretion apparatus regulatory protein       |
| G2583_3516             | ECs3735 | Z4199  | -    | hypothetical protein                                           |
| G2583_3517             | ECs3736 | Z4200  | -    | hypothetical protein                                           |
| G2583_3517             | ECs3737 | Z4201  | -    | hypothetical protein                                           |
| G2583_3518             | glyU    | RNA079 | glyU | Gly tRNA                                                       |
| G2583_3519             | ECs3738 | Z4203  | ygeR | Hypothetical lipoprotein YgeR                                  |
| G2583_3520             | ECs3739 | Z4205  | xdhA | Xanthine dehydrogenase                                         |
| G2583_3521             | ECs3740 | Z4206  | xdhB | Xanthine dehydrogenase FAD-binding subunit                     |
| G2583_3522             | ECs3741 | Z4207  | xdhC | Xanthine dehydrogenase iron-sulfur-binding subunit             |
| G2583_3523             | ECs3742 | Z4208  | ygeV | Putative transcriptional regulator                             |
| G2583_3524             | ECs3743 | Z4209  | ygeW | hypothetical protein                                           |
| G2583_3525             | ECs3744 | Z4210  | ygeX | Putative diaminopropionate ammonia-lyase                       |
| G2583_3526             | ECs3745 | Z4211  | ygeY | peptidase                                                      |
| G2583_3527             | ECs3746 | Z4212  | hyuA | D-phenylhydantoinase                                           |
| G2583_3528             | ECs3747 | Z4213  | yqeA | Carbamate kinase arcC homolog                                  |
| G2583_3529             | ECs3748 | Z4214  | yqeB | Putative xanthine dehydrogenase accessory factor               |
| G2583_3530             | ECs3749 | Z4215  | yqeC | Probable selenium-dependent hydroxylase accessory protein YqeC |
| G2583_3531             | ECs3750 | Z4216  | ygfJ | Molybdenum hydroxylase accessory protein, YgfJ family          |
| G2583_3532             | ECs3751 | Z4217  | ygfK | putative oxidoreductase, Fe-S subunit                          |
| G2583_3533             | ECs3752 | Z4218  | ssnA | Cytosine deaminase and related metal-dependent hydrolases      |
| G2583_3534             | ECs3753 | Z4219  | ygfM | hypothetical protein                                           |
| G2583_3535             | ECs3754 | Z4220  | xdhD | Probable hypoxanthine oxidase xdhD                             |
| G2583_3536             | ECs3755 | Z4221  | ygfO | Putative purine permease ygfO                                  |
| G2583_3537             | ECs3756 | Z4222  | guaD | guanine deaminase                                              |

Table S10. The orthologue table of the O55 and O157 strains Page 122

| Locus_tag <sup>a</sup> |         |        | Gene | Product                                                                                   |
|------------------------|---------|--------|------|-------------------------------------------------------------------------------------------|
| CB9615                 | Sakai   | EDL933 |      |                                                                                           |
| G2583_3538             | ECs3757 | Z4223  | ygfQ | hypothetical protein                                                                      |
| G2583_3539             | ECs3758 | Z4224  | ygfS | Putative electron transport protein ygfS                                                  |
| G2583_3540             | ECs3759 | Z4225  | ygfT | putative oxidoreductase Fe-S binding subunit                                              |
| G2583_3541             | ECs3760 | Z4226  | ygfU | Putative xanthine permease                                                                |
| G2583_3542             | ECs3761 | Z4227  | idi  | Isopentenyl-diphosphate Delta-isomerase                                                   |
| G2583_3543             | ECs3762 | Z4228  | lysS | Lysyl-tRNA synthetase                                                                     |
| G2583_3544             | ECs3763 | Z4229  | prfB | Peptide chain release factor 2                                                            |
| G2583_3545             | ECs3764 | Z4230  | recJ | Single-stranded-DNA-specific exonuclease RecJ                                             |
| G2583_3546             | ECs3765 | Z4231  | dsbC | Thiol:disulfide interchange protein dsbC precursor                                        |
| G2583_3547             | ECs3766 | Z4232  | xerD | Tyrosine recombinase xerD                                                                 |
| G2583_3548             | ECs3767 | Z4233  | fldB | Flavodoxin-2                                                                              |
| G2583_3549             | ECs3768 | Z4234  | ygfX | hypothetical protein                                                                      |
| G2583_3550             | ECs3769 | Z4235  | ygfY | UPF0350 protein ygfY                                                                      |
| G2583_3551             | ECs3770 | Z4236  | ygfZ | tRNA-modifying protein ygfZ                                                               |
| G2583_3552             | ECs3771 | Z4237  | yqfA | UPF0073 inner membrane protein yqfA                                                       |
| G2583_3553             | ECs3772 | Z4238  | yqfB | Uncharacterized protein conserved in bacteria                                             |
| G2583_3554             | ECs3773 | Z4239  | bgIA | 6-phospho-beta-glucosidase BglA                                                           |
| G2583_3555             | ECs3774 | Z4240  | gcvP | Glycine dehydrogenase [decarboxylating]                                                   |
| G2583_3556             | ECs3775 | Z4241  | gcvH | Glycine cleavage system H protein                                                         |
| G2583_3557             | ECs3776 | Z4242  | gcvT | Glycine cleavage complex protein T,<br>aminomethyltransferase, tetrahydrofolate-dependent |
| G2583_3558             | ECs3777 | Z4243  | visC | Ubiquinone biosynthesis hydroxylase,<br>UbiH/UbiF/VisC/COQ6 family                        |
| G2583_3559             | ECs3778 | Z4244  | ubiH | 2-octaprenyl-6-methoxyphenol 4-monoxygenase                                               |
| G2583_3560             | ECs3779 | Z4245  | pepP | Xaa-Pro aminopeptidase                                                                    |
| G2583_3561             | ECs3780 | Z4246  | ygfB | UPF0149 protein ygfB                                                                      |
| G2583_3562             | ECs3781 | Z4247  | zapA | Z-ring-associated protein                                                                 |
| G2583_3563             | ssrS    | RNA080 | ssrS | ncRNA                                                                                     |
| G2583_3564             | ECs3782 | Z4249  | ygfA | Putative ligase                                                                           |
| G2583_3565             |         |        | -    | ncRNA                                                                                     |
| G2583_3566             | ECs3783 |        | -    | hypothetical protein                                                                      |
|                        |         | Z4250  | -    | hypothetical protein                                                                      |
| G2583_3567             |         |        | -    | ncRNA                                                                                     |
| G2583_3568             | ECs3784 | Z4251  | serA | D-3-phosphoglycerate dehydrogenase                                                        |
| G2583_3569             | ECs3785 | Z4252  | rpiA | Ribose 5-phosphate isomerase                                                              |
| G2583_3570             | ECs3786 | Z4253  | argP | Chromosome initiation inhibitor                                                           |
| G2583_3571             | ECs3787 | Z4254  | scpA | Methylmalonyl-CoA mutase                                                                  |
| G2583_3572             | ECs3788 | Z4255  | argK | LAO/AO transport system kinase                                                            |
| G2583_3573             | ECs3789 | Z4256  | scpB | Methylmalonyl-CoA decarboxylase                                                           |
| G2583_3574             | ECs3790 | Z4257  | scpC | Succinate CoA transferase                                                                 |
| G2583_3575             | ECs3791 |        | ygfI | Uncharacterized HTH-type transcriptional regulator ygfI                                   |
| G2583_3575             | ECs3792 | Z4258  | ygfI | Uncharacterized HTH-type transcriptional regulator ygfI                                   |
| G2583_3576             | ECs3793 | Z4259  | yggE | hypothetical protein                                                                      |
| G2583_3577             | ECs3794 | Z4260  | argO | arginine exporter protein                                                                 |

Table S10. The orthologue table of the O55 and O157 strains Page 123

| Locus_tag <sup>a</sup> |         |        | Gene | Product                                                                                                                                          |
|------------------------|---------|--------|------|--------------------------------------------------------------------------------------------------------------------------------------------------|
| CB9615                 | Sakai   | EDL933 |      |                                                                                                                                                  |
| G2583_3578             | ECs3795 | Z4261  | mscS | Small-conductance mechanosensitive channel                                                                                                       |
| G2583_3579             | ECs3796 | Z4263  | fbaA | Fructose-bisphosphate aldolase                                                                                                                   |
| G2583_3580             | ECs3797 | Z4265  | pgk  | Phosphoglycerate kinase                                                                                                                          |
| G2583_3581             | ECs3798 | Z4266  | epd  | D-erythrose-4-phosphate dehydrogenase                                                                                                            |
| G2583_3582             | ECs3799 | Z4267  | -    | hypothetical protein                                                                                                                             |
| G2583_3583             | ECs3800 | Z4268  | -    | hypothetical protein                                                                                                                             |
| G2583_3584             | ECs3801 | Z4269  | -    | hypothetical protein                                                                                                                             |
| G2583_3585             | ECs3802 | Z4270  | -    | ABC transporter, ATP-binding protein                                                                                                             |
| G2583_3586             | ECs3803 | Z4271  | -    | putative ATP-binding protein of ABC transport system                                                                                             |
| G2583_3587             | ECs3804 | Z4273  | yggC | putative fructose transport system kinase                                                                                                        |
| G2583_3588             | ECs3805 | Z4274  | yggD | Mannitol operon repressor                                                                                                                        |
| G2583_3589             | ECs3806 | Z4275  | yggF | Fructose-1,6-bisphosphatase, class II                                                                                                            |
| G2583_3590             | ECs3807 | Z4276  | yggP | L-sorbose 1-phosphate reductase                                                                                                                  |
| G2583_3591             | ECs3808 | Z4277  | cmtA | PTS system mannitol-specific EIICB component (EIICB-Mtl) (EII-Mtl) [Includes: Mannitol permease IIC component (PTS system mannitol-specific EIIC |
| G2583_3592             | ECs3809 | Z4278  | cmtB | hypothetical protein                                                                                                                             |
| G2583_3593             | ECs3810 | Z4279  | tktA | transketolase                                                                                                                                    |
| G2583_3594             | ECs3811 | Z4280  | yggG | hypothetical protein                                                                                                                             |
| G2583_3595             | ECs3812 | Z4281  | speB | agmatinase                                                                                                                                       |
| G2583_3596             | ECs3813 | Z4282  | -    | hypothetical protein                                                                                                                             |
| G2583_3597             | ECs3814 | Z4283  | speA | Biosynthetic arginine decarboxylase                                                                                                              |
| G2583_3598             | ECs3815 | Z4284  | yqgB | hypothetical protein                                                                                                                             |
| G2583_3599             | ECs3816 | Z4285  | yqgC | hypothetical protein                                                                                                                             |
| G2583_3600             | ECs3817 | Z4286  | yqgD | hypothetical protein                                                                                                                             |
| G2583_3601             | ECs3818 | Z4287  | metK | S-adenosylmethionine synthetase                                                                                                                  |
| G2583_3602             | ECs3819 | Z4288  | galP | Galactose-proton symporter                                                                                                                       |
| G2583_3603             | ECs3820 | Z4289  | yggI | hypothetical protein                                                                                                                             |
| G2583_3604             | ECs3821 | Z4290  | endA | Endonuclease I                                                                                                                                   |
| G2583_3605             | ECs3822 | Z4291  | rsmE | hypothetical protein                                                                                                                             |
| G2583_3606             | ECs3823 | Z4292  | gshB | Glutathione synthetase                                                                                                                           |
| G2583_3607             | ECs3824 | Z4293  | yqgE | UPF0301 protein yqgE                                                                                                                             |
| G2583_3608             | ECs3825 | Z4294  | yqgF | Putative Holliday junction resolvase                                                                                                             |
| G2583_3609             | ECs3827 | Z4295  | yggR | Twitching motility family protein                                                                                                                |
| G2583_3610             | ECs3826 | Z4296  | yggS | UPF0001 protein yggS                                                                                                                             |
| G2583_3611             | ECs3828 | Z4297  | yggT | putative resistance protein                                                                                                                      |
| G2583_3612             | ECs3829 | Z4298  | yggU | conserved hypothetical protein                                                                                                                   |
| G2583_3613             | ECs3830 | Z4299  | rdgB | Nucleoside-triphosphatase rdgB                                                                                                                   |
| G2583_3614             | ECs3831 | Z4300  | yggW | Putative oxygen-independent coproporphyrinogen III oxidase                                                                                       |
| G2583_3615             | ECs3832 | Z4301  | yggM | putative alpha helix chain                                                                                                                       |
| G2583_3616             | ECs3833 | Z4302  | ansB | L-asparaginase 2                                                                                                                                 |
| G2583_3617             | ECs3834 | Z4303  | yggN | hypothetical protein                                                                                                                             |
| G2583_3618             | ECs3835 | Z4304  | yggL | hypothetical protein                                                                                                                             |

Table S10. The orthologue table of the O55 and O157 strains Page 124

| Locus_tag <sup>a</sup> |           |           | Gene   | Product                                                       |
|------------------------|-----------|-----------|--------|---------------------------------------------------------------|
| CB9615                 | Sakai     | EDL933    |        |                                                               |
| G2583_3619             | ECs3836   | Z4305     | trmI   | tRNA (Guanine-N(7)-)-methyltransferase                        |
| G2583_3620             | ECs3837   | Z4306     | mutY   | A/G-specific adenine glycosylase                              |
| G2583_3621             | ECs3838   | Z4307     | yggX   | Probable Fe(2+)-trafficking protein                           |
| G2583_3622             | ECs3839   | Z4308     | mltC   | Membrane-bound lytic murein transglycosylase C precursor      |
| G2583_3623             | ECs3840   | Z4309     | nupG   | Transport of nucleosides, permease protein                    |
| G2583_3624             | ECs3841   | Z4310     | speC   | Ornithine decarboxylase isozyme                               |
| G2583_3625             | ECs3842   | Z4311     | yqgA   | putative transport protein                                    |
| G2583_3626             | pheV      | RNA081    | pheV   | Phe tRNA                                                      |
| G2583_3627             | ECs3843   | Z4313     | intB   | Site-specific recombinase, phage integrase family             |
| G2583_3628             | ECs3844   | Z4314     | -      | unknown protein encoded by ISEc8                              |
|                        | ECs3845   |           | -      | hypothetical protein                                          |
| G2583_3629             | ECs3846   | Z4315     | ISSfI4 | ISSfI3 OrfA                                                   |
| G2583_3630             | ECs3847   | Z4316     | ISSfI4 | ISSfI4 ORF2                                                   |
| G2583_3631             | ECs3848   | Z4317     | ISSfI4 | Transposase and inactivated derivatives                       |
| G2583_3632             | ECs3849   | Z4318     | -      | DNA helicase II                                               |
|                        |           | Z4320     | -      | hypothetical protein                                          |
| G2583_3633             | ECs3850   | Z4321     | PagC   | PagC-like membrane protein                                    |
|                        | ECs3851   |           | -      | hypothetical protein                                          |
| G2583_3634             | ECs3852   | Z4322     | -      | hypothetical protein                                          |
| G2583_3635             |           |           | -      | ISEc13 transposase                                            |
|                        |           | Z4323     | -      | hypothetical protein                                          |
| G2583_3635             | ECs3853   | Z4324     | -      | ISEc13 transposase                                            |
| G2583_3636             | ECs3854   |           | -      | ST51 protein                                                  |
|                        |           | Z4325     | -      | hypothetical protein                                          |
| G2583_3637             | ECs3855   | Z4326     | ospD   | Ent protein                                                   |
|                        | ECs3856   |           | -      | hypothetical protein                                          |
|                        |           | Z4327     | -      | hypothetical protein                                          |
| G2583_3638             | ECs3857   | Z4328     | -      | NleB                                                          |
| G2583_3639             | ECs3858   | Z4329     | NleE   | ST47 protein                                                  |
| G2583_3640             | ECs3859   | Z4330     | -      | Putative transposase                                          |
|                        |           | Z4331     | -      | hypothetical protein                                          |
| G2583_3641             | ECs3860   | Z4332     | lifA   | EHEC factor for adherence                                     |
| G2583_3641             | ECs3861   | Z4333     | lifA   | EHEC factor for adherence                                     |
| Indel-169              | ECs3862   | Z4334     | -      | putative transposase OrfB protein of insertion sequence IS629 |
| Indel-169              | ECs3863   | Z4335     | -      | putative transposase OrfA protein of insertion sequence IS629 |
| Indel-169              | ECs3864   |           | -      | hypothetical protein                                          |
| Indel-169              | ECs3865   | Z4336     | -      | hypothetical protein                                          |
| Indel-169              | ECs3866   | Z4337     | -      | hypothetical protein                                          |
| G2583_3642             | Indel-170 | Indel-170 | -      | Transposase and inactivated derivatives                       |
| G2583_3643             | Indel-170 | Indel-170 | -      | Transposase and inactivated derivatives                       |
|                        | ECs3867   |           | -      | hypothetical protein                                          |

Table S10. The orthologue table of the O55 and O157 strains Page 125

| Locus_tag <sup>a</sup> |           |           | Gene | Product                                                  |
|------------------------|-----------|-----------|------|----------------------------------------------------------|
| CB9615                 | Sakai     | EDL933    |      |                                                          |
| G2583_3644             | ECs3868   | Z4338     | -    | IS66 family transposase orfB                             |
| G2583_3645             | ECs3869   | Z4340     | -    | Transposase and inactivated derivatives                  |
| G2583_3646             | ECs3870   |           | -    | IS3                                                      |
| Indel-171              | ECs3871   |           | -    | hypothetical protein                                     |
| G2583_3647             | Indel-172 | Indel-172 | yagK | hypothetical protein                                     |
| G2583_3648             | Indel-172 | Indel-172 | -    | hypothetical protein                                     |
| G2583_3649             | Indel-172 | Indel-172 | -    | DNA-directed RNA polymerase, beta subunit/140 kD subunit |
| G2583_3650             | Indel-172 | Indel-172 | -    | hypothetical protein                                     |
| G2583_3651             | Indel-172 | Indel-172 | yagK | hypothetical protein                                     |
| G2583_3652             | Indel-172 | Indel-172 | -    | hypothetical protein                                     |
| G2583_3653             | Indel-172 | Indel-172 | -    | hypothetical protein                                     |
| G2583_3654             | Indel-172 | Indel-172 | -    | Predicted transcriptional regulator                      |
| G2583_3655             | Indel-172 | Indel-172 | -    | hypothetical protein                                     |
| G2583_3656             | Indel-172 | Indel-172 | -    | ORFa1203                                                 |
| G2583_3657             | Indel-172 | Indel-172 | -    | IS629 transposase orfB                                   |
| G2583_3658             | Indel-172 | Indel-172 | -    | hypothetical protein                                     |
| G2583_3659             | Indel-172 | Indel-172 | -    | hypothetical protein                                     |
| G2583_3660             | Indel-172 | Indel-172 | yfjP | hypothetical protein                                     |
| G2583_3661             | Indel-172 | Indel-172 | flu  | Type V secretory pathway, adhesin AidA                   |
| G2583_3662             | Indel-172 | Indel-172 | insN | unknown protein encoded by IS911 within prophage CP-933L |
| G2583_3663             | Indel-172 | Indel-172 | -    | putative transposase                                     |
| G2583_3664             | Indel-172 | Indel-172 | ykfF | hypothetical protein                                     |
| G2583_3665             | Indel-172 | Indel-172 | yafZ | hypothetical protein                                     |
| G2583_3666             | Indel-172 | Indel-172 | yfjX | hypothetical protein                                     |
| G2583_3667             | Indel-172 | Indel-172 | yeeS | DNA repair protein, RadC family                          |
| G2583_3668             | Indel-172 | Indel-172 | yeeT | hypothetical protein                                     |
| G2583_3669             | Indel-172 | Indel-172 | yeeU | Putative structural protein                              |
| G2583_3670             | Indel-172 | Indel-172 | yeeV | hypothetical protein                                     |
| G2583_3671             | Indel-172 | Indel-172 | yeeW | hypothetical protein                                     |
| G2583_3672             | Indel-172 | Indel-172 | tnpA | Transposase for ISEc12                                   |
| G2583_3673             | Indel-172 | Indel-172 | tnpA | TnpA                                                     |
| G2583_3674             | Indel-172 | Indel-172 | -    | hypothetical protein                                     |
| G2583_3675             | Indel-172 | Indel-172 | -    | hypothetical protein                                     |
| G2583_3676             | Indel-172 | Indel-172 | -    | hypothetical protein                                     |
| G2583_3677             | Indel-172 | Indel-172 | yghD | Putative general secretion pathway protein M-type yghD   |
| G2583_3678             | Indel-172 | Indel-172 | gspL | Type II secretory pathway, component Pull                |
| G2583_3679             | Indel-172 | Indel-172 | gspK | General secretion pathway protein K                      |
| G2583_3680             | Indel-172 | Indel-172 | gspJ | General secretion pathway protein GspJ                   |
| G2583_3681             | Indel-172 | Indel-172 | gspI | General secretion pathway protein GspI                   |
| G2583_3682             | Indel-172 | Indel-172 | gspH | General secretion pathway protein H                      |
| G2583_3683             | Indel-172 | Indel-172 | gspG | General secretion pathway protein G                      |
| G2583_3684             | Indel-172 | Indel-172 | gspF | Hypothetical type II secretion protein                   |

Table S10. The orthologue table of the O55 and O157 strains Page 126

| Locus_tag <sup>a</sup> |           |           | Gene  | Product                                                                         |
|------------------------|-----------|-----------|-------|---------------------------------------------------------------------------------|
| CB9615                 | Sakai     | EDL933    |       |                                                                                 |
| G2583_3685             | Indel-172 | Indel-172 | gspE  | Type II secretory pathway, ATPase PulE/Tfp pil us assembly pathway, ATPase PilB |
| G2583_3686             | Indel-172 | Indel-172 | gspD  | General secretion pathway protein D                                             |
| G2583_3687             | Indel-172 | Indel-172 | gspC  | General secretion pathway protein C                                             |
| G2583_3688             | Indel-172 | Indel-172 | yghG  | Hypothetical lipoprotein                                                        |
| G2583_3689             | Indel-172 | Indel-172 | pppA  | Putative prepilin peptidase A                                                   |
| G2583_3690             | Indel-172 | Indel-172 | yghJ  | Putative lipoprotein acfD homolog precursor                                     |
| G2583_3691             | Indel-172 | Indel-172 | -     | hypothetical protein                                                            |
| G2583_3692             | Indel-172 | Indel-172 | -     | hypothetical protein                                                            |
| G2583_3693             | Indel-172 | Indel-172 | glcA  | Glycolate permease glcA                                                         |
| G2583_3694             | Indel-172 | Indel-172 | glcB  | Malate synthase G                                                               |
| G2583_3695             | Indel-172 | Indel-172 | glcG  | hypothetical protein                                                            |
| G2583_3696             | Indel-172 | Indel-172 | glcF  | Glycolate oxidase iron-sulfur subunit                                           |
| G2583_3697             | Indel-172 | Indel-172 | glcE  | Glycolate oxidase, subunit GlcE                                                 |
| G2583_3698             | Indel-172 | Indel-172 | glcD  | Glycolate oxidase subunit glcD                                                  |
| G2583_3699             | Indel-172 | Indel-172 | glcC  | Glc operon transcriptional activator                                            |
| G2583_3700             | Indel-172 | Indel-172 | yghO  | hypothetical protein                                                            |
| G2583_3701             | Indel-172 | Indel-172 | -     | AMP-binding enzyme                                                              |
| G2583_3702             | Indel-172 | Indel-172 | -     | hypothetical protein                                                            |
| G2583_3703             | Indel-172 | Indel-172 | -     | Phosphopantetheine-binding                                                      |
| G2583_3704             | Indel-172 | Indel-172 | -     | 7-keto-8-aminopelargonate synthetase and related enzymes                        |
| G2583_3705             | Indel-172 | Indel-172 | -     | Permease YjgP/YjgQ family protein precursor                                     |
| G2583_3706             | Indel-172 | Indel-172 | -     | Permease YjgP/YjgQ family protein precursor                                     |
| G2583_3707             | Indel-172 | Indel-172 | ytfJ  | Protein ytfJ                                                                    |
| G2583_3708             | Indel-172 | Indel-172 | -     | hypothetical protein                                                            |
| G2583_3709             | Indel-172 | Indel-172 | yghQ  | Putative polysaccharide biosynthesis protein                                    |
| G2583_3710             | Indel-172 | Indel-172 | yghR  | Thymidylate kinase                                                              |
| G2583_3711             | Indel-172 | Indel-172 | yghS  | Uncharacterized ATP-binding protein yghS                                        |
| G2583_3712             | Indel-172 | Indel-172 | yghT  | Uncharacterized ATP-binding protein yghT                                        |
| G2583_3713             | ECs3872   | Z4341     | pitB  | Probable low-affinity inorganic phosphate transporter 2                         |
| G2583_3714             | ECs3873   | Z4342     | gsp   | Glutathionylspermidine amidase/glutathionylspermidine synthase                  |
| G2583_3715             | ECs3874   | Z4343     | yghU  | putative glutathione S-transferase YghU                                         |
| G2583_3716             | ECs3875   | Z4344     | hybG  | Hydrogenase-2 operon protein hybG                                               |
| G2583_3717             | ECs3876   | Z4345     | hybF  | Probable hydrogenase nickel incorporation protein hybF                          |
| G2583_3718             | ECs3877   | Z4346     | hybE  | Hydrogenase-2 operon protein hybE                                               |
| G2583_3719             | ECs3878   | Z4347     | hybD  | predicted maturation element for hydrogenase 2                                  |
| G2583_3720             | ECs3879   | Z4348     | hybC  | Hydrogenase-2 large chain precursor                                             |
| G2583_3721             | ECs3880   | Z4349     | hybB  | Probable Ni/Fe-hydrogenase 2 b-type cytochrome                                  |
| G2583_3722             | ECs3881   | Z4350     | hybA  | Hydrogenase-2 operon protein hybA precursor                                     |
| G2583_3723             | ECs3882   | Z4351     | hybO  | Hydrogenase-2 small chain precursor                                             |
| G2583_3724             | ECs3883   | Z4352     | yghW  | hypothetical protein                                                            |
| G2583_3725             | ECs3884   | Z4353     | yghYX | Putative enzyme                                                                 |

Table S10. The orthologue table of the O55 and O157 strains Page 127

| Locus_tag <sup>a</sup> |         |        | Gene | Product                                                                     |
|------------------------|---------|--------|------|-----------------------------------------------------------------------------|
| CB9615                 | Sakai   | EDL933 |      |                                                                             |
| G2583_3726             | ECs3885 | Z4354  | yghZ | aldo-keto reductase                                                         |
| G2583_3727             | ECs3886 | Z4355  | yqhA | UPF0114 protein yqhA                                                        |
| G2583_3728             | ECs3887 | Z4356  | yghA | Uncharacterized oxidoreductase yghA                                         |
|                        | ECs3888 | Z4357  | -    | hypothetical protein                                                        |
| G2583_3729             | ECs3889 | Z4358  | exbD | Biopolymer transport protein exbD                                           |
| G2583_3730             | ECs3890 | Z4359  | exbB | Biopolymer transport protein exbB                                           |
| G2583_3731             | ECs3891 | Z4360  | -    | hypothetical protein                                                        |
| G2583_3732             | ECs3892 | Z4361  | metC | Cystathionine beta-lyase                                                    |
| G2583_3733             | ECs3893 | Z4362  | yghB | Inner membrane protein yghB                                                 |
| G2583_3734             | ECs3895 | Z4363  | yqhC | Putative ARAC-type regulatory protein                                       |
| G2583_3735             | ECs3894 | Z4364  | yqhD | Alcohol dehydrogenase yqhD                                                  |
| G2583_3736             | ECs3896 | Z4365  | dkgA | 2,5-diketo-D-gluconic acid reductase A                                      |
| G2583_3737             | ECs3897 | Z4367  | yqhG | hypothetical protein                                                        |
| G2583_3737             | ECs3898 | Z4368  | yqhG | hypothetical protein                                                        |
| G2583_3738             | ECs3899 | Z4369  | yqhH | predicted outer membrane lipoprotein                                        |
| G2583_3739             | ECs3900 | Z4370  | ygiQ | UPF0313 protein ygiQ                                                        |
| G2583_3740             | ECs3901 | Z4371  | sufl | repressor protein for FtsI                                                  |
| G2583_3741             | ECs3902 | Z4372  | plsC | 1-acyl-sn-glycerol-3-phosphate acyltransferase                              |
| G2583_3742             | ECs3903 | Z4373  | parC | DNA topoisomerase 4 subunit A                                               |
| G2583_3743             | ECs3904 | Z4374  | ygiS | Bacterial extracellular solute-binding protein, family 5                    |
| G2583_3744             | ECs3905 | Z4375  | ygiV | hypothetical protein                                                        |
| G2583_3745             | ECs3906 | Z4376  | ygiW | Protein ygiW                                                                |
| G2583_3746             | ECs3907 | Z4377  | qseB | DNA-binding response regulator in two-component regulatory system with QseC |
| G2583_3747             | ECs3908 | Z4378  | qseC | sensor protein QseC                                                         |
| G2583_3747             | ECs3909 | Z4378  | qseC | sensor protein QseC                                                         |
| G2583_3748             | ECs3910 | Z4379  | mdaB | Modulator of drug activity B                                                |
| G2583_3749             | ECs3911 | Z4380  | ygiN | Protein ygiN                                                                |
| G2583_3750             | ECs3912 | Z4381  | -    | Iron transport system regulatory protein FitR                               |
| G2583_3751             | ECs3913 | Z4382  | -    | Putative iron compound-binding protein of ABC transporter family            |
| G2583_3752             | ECs3914 | Z4383  | -    | Putative iron compound permease protein of ABC transporter family           |
| G2583_3753             | ECs3915 | Z4384  | -    | Iron ABC transporter, permease protein FitC                                 |
| G2583_3754             | ECs3916 | Z4385  | FepC | Iron ABC transporter, ATP binding protein FitB                              |
| G2583_3755             | ECs3917 | Z4386  | -    | TonB-dependent outer membrane ferric coprogen receptor FitA                 |
| G2583_3756             | ECs3918 | Z4387  | parE | DNA topoisomerase IV, B subunit                                             |
| G2583_3757             | ECs3919 | Z4388  | yqiA | Esterase yqiA                                                               |
| G2583_3758             | ECs3920 | Z4389  | cpdA | cyclic 3',5'-adenosine monophosphate                                        |
| G2583_3759             | ECs3921 | Z4390  | yqiB | hypothetical protein                                                        |
| G2583_3760             | ECs3922 | Z4391  | nudF | ADP-ribose pyrophosphatase                                                  |
| G2583_3761             | ECs3923 | Z4392  | tolC | Outer membrane protein TolC                                                 |
| G2583_3762             | ECs3924 | Z4393  | ygiA | hypothetical protein                                                        |

Table S10. The orthologue table of the O55 and O157 strains Page 128

| Locus_tag <sup>a</sup> |         |        | Gene | Product                                                                    |
|------------------------|---------|--------|------|----------------------------------------------------------------------------|
| CB9615                 | Sakai   | EDL933 |      |                                                                            |
| G2583_3763             | ECs3925 | Z4394  | ygiB | UPF0441 protein ygiB                                                       |
| G2583_3764             | ECs3926 | Z4395  | ygiC | putative synthetase/amidase                                                |
| G2583_3765             | ECs3927 | Z4396  | ygiD | Aromatic ring-opening dioxygenase                                          |
| G2583_3766             | ECs3928 | Z4397  | zupT | Zinc transporter zupT                                                      |
| G2583_3767             |         | Z4398  | -    | hypothetical protein                                                       |
| G2583_3768             | ECs3929 | Z4399  | ribB | 3,4-dihydroxy-2-butanone 4-phosphate synthase                              |
| G2583_3769             | ECs3930 | Z4400  | yqiC | hypothetical protein                                                       |
| G2583_3770             | ECs3931 | Z4401  | glgS | Glycogen synthesis protein glgS                                            |
| G2583_3771             | ECs3932 | Z4402  | yqiJ | Putative oxidoreductase                                                    |
| G2583_3772             | ECs3933 | Z4403  | yqiK | SPFH/band 7 domain protein                                                 |
| G2583_3773             |         |        | -    | ncRNA                                                                      |
| G2583_3774             | ECs3934 |        | -    | hypothetical protein                                                       |
| G2583_3775             |         |        | -    | ncRNA                                                                      |
| G2583_3776             | ECs3935 | Z4405  | rfaE | Bifunctional protein hldE [Includes: D-beta-D-heptose 7-phosphate kinase   |
| G2583_3777             | ECs3936 | Z4406  | glnE | bifunctional glutamine-synthetase<br>adenyltransferase/deadenyltransferase |
| G2583_3778             | ECs3937 | Z4407  | ygiF | Adenylate cyclase                                                          |
| G2583_3779             | ECs3938 | Z4408  | htrG | putative signal transduction protein                                       |
| G2583_3780             | ECs3939 | Z4409  | cca  | TRNA nucleotidyltransferase                                                |
| G2583_3781             | ECs3940 | Z4410  | bacA | Putative undecaprenol kinase                                               |
| G2583_3782             | ECs3941 | Z4411  | folB | Dihydroneopterin aldolase                                                  |
| G2583_3783             | ECs3942 | Z4412  | ygiH | UPF0078 membrane protein ygiH                                              |
| G2583_3784             | ECs3943 | Z4413  | ttdR | transcriptional activator TtdR                                             |
| G2583_3785             | ECs3944 | Z4414  | ttdA | L(+)-tartrate dehydratase subunit alpha                                    |
| G2583_3786             | ECs3945 | Z4415  | ttdB | L(+)-tartrate dehydratase subunit beta                                     |
| G2583_3787             | ECs3946 | Z4416  | ttdT | L-tartrate/succinate antiporter                                            |
| G2583_3788             | ECs3947 | Z4417  | ygiD | Probable O-sialoglycoprotein endopeptidase                                 |
| G2583_3789             | ECs3948 | Z4418  | rpsU | Ribosomal protein S21                                                      |
| G2583_3790             | ECs3949 | Z4419  | dnaG | DNA primase                                                                |
| G2583_3791             | ECs3950 | Z4420  | rpoD | RNA polymerase sigma factor RpoD                                           |
| G2583_3792             | ECs3951 | Z4421  | mug  | G/U mismatch-specific DNA glycosylase                                      |
| G2583_3793             | ileX    | RNA082 | ileX | Met tRNA                                                                   |
| G2583_3794             | ECs3952 | Z4423  | yqiH | Siderophore-interacting protein                                            |
| G2583_3795             | ECs3953 | Z4424  | yqiI | transcriptional regulator, PadR family                                     |
| G2583_3796             | ECs3954 | Z4425  | aer  | Aerotaxis receptor                                                         |
| G2583_3797             | ECs3955 | Z4426  | ygiG | Ornithine/acetylornithine aminotransferase                                 |
| G2583_3798             | ECs3956 | Z4427  | ygiH | T-RNA-binding domain protein                                               |
| G2583_3799             | ECs3957 | Z4428  | ebgR | DNA-binding transcriptional repressor                                      |
| G2583_3800             | ECs3958 | Z4429  | ebgA | Evolved beta-D-galactosidase, alpha subunit                                |
| G2583_3801             | ECs3959 | Z4430  | ebgC | Evolved beta-galactosidase subunit beta                                    |
| G2583_3802             | ECs3960 | Z4431  | ygiI | Amino acid permease family protein                                         |
| G2583_3803             | ECs3961 | Z4432  | ygiJ | hypothetical protein                                                       |
| G2583_3804             | ECs3962 | Z4433  | ygiK | predicted glycosyl hydrolase                                               |



Table S10. The orthologue table of the O55 and O157 strains Page 129

| Locus_tag <sup>a</sup> |         |        | Gene | Product                                                                         |
|------------------------|---------|--------|------|---------------------------------------------------------------------------------|
| CB9615                 | Sakai   | EDL933 |      |                                                                                 |
| G2583_3805             | ECs3963 | Z4434  | fadH | 2,4-dienoyl-CoA reductase                                                       |
| G2583_3806             | ECs3964 | Z4435  | ygjM | Helix-turn-helix DNA-binding domain protein                                     |
| G2583_3807             | ECs3965 | Z4436  | ygjN | hypothetical protein                                                            |
| G2583_3808             | ECs3966 | Z4437  | rlmG | Putative enzyme                                                                 |
| G2583_3809             | ECs3967 | Z4438  | ygjP | hypothetical protein                                                            |
| G2583_3810             | ECs3968 | Z4439  | ygjQ | Putative SanA protein                                                           |
| G2583_3811             | ECs3969 | Z4440  | ygjR | Oxidoreductase, NAD binding                                                     |
| G2583_3812             | ECs3970 | Z4441  | alx  | Inner membrane protein alx                                                      |
| G2583_3813             | ECs3971 | Z4442  | sstT | Sodium:serine/threonine symporter                                               |
| G2583_3814             | ECs3972 | Z4443  | ygjV | Putative inner membrane protein                                                 |
| G2583_3815             | ECs3973 | Z4444  | uxaA | Altronate dehydratase                                                           |
| G2583_3816             | ECs3974 | Z4445  | uxaC | Uronate isomerase                                                               |
| G2583_3817             | ECs3975 | Z4446  | exuT | Hexuronate transporter                                                          |
| G2583_3818             | ECs3976 | Z4448  | exuR | Exu regulon transcriptional regulator                                           |
| G2583_3819             | ECs3977 | Z4449  | ygjA | hypothetical protein                                                            |
| G2583_3820             | ECs3978 | Z4450  | ygjB | hypothetical protein                                                            |
| G2583_3821             | ECs3979 | Z4451  | ygjC | hypothetical protein                                                            |
| G2583_3822             | ECs3980 | Z4452  | ygjD | hypothetical protein                                                            |
| G2583_3823             | ECs3981 | Z4453  | ygjE | ORF_o157; overlaps o101 by 64 bases, no frameshift found, other starts possible |
| G2583_3824             | ECs3982 | Z4454  | ygjK | hypothetical protein                                                            |
| G2583_3825             | ECs3983 | Z4455  | ygjF | Putative inner membrane protein YqjF                                            |
| G2583_3826             | ECs3984 | Z4456  | ygjG | putative transferase                                                            |
| G2583_3827             | ECs3985 | Z4457  | yhaH | putative inner membrane protein YhaH                                            |
| G2583_3828             | ECs3986 | Z4458  | yhaI | Inner membrane protein yhaI                                                     |
| G2583_3829             | ECs3987 | Z4459  | yhaJ | putative transcriptional regulator LYSR-type                                    |
| G2583_3830             | ECs3988 | Z4460  | yhaK | Pirin-like protein yhaK                                                         |
| G2583_3831             | ECs3989 | Z4461  | yhaL | hypothetical protein                                                            |
| G2583_3832             | ECs3990 | Z4462  | yhaM | UPF0597 protein yhaM                                                            |
| G2583_3833             | ECs3991 | Z4463  | yhaO | putative transport system permease protein                                      |
| G2583_3834             | ECs3992 | Z4464  | tdcG | L-serine ammonia-lyase TdcG                                                     |
| G2583_3835             | ECs3993 | Z4465  | tdcF | TdcF protein                                                                    |
| G2583_3836             | ECs3994 | Z4466  | tdcE | Keto-acid formate acetyltransferase                                             |
| G2583_3837             | ECs3995 | Z4467  | tdcD | Putative kinase                                                                 |
| G2583_3838             | ECs3996 | Z4468  | tdcC | Threonine/serine transporter tdcC (H(+)/threonine-serine symporter)             |
| G2583_3839             | ECs3997 | Z4469  | tdcB | Threonine dehydratase catabolic                                                 |
| G2583_3840             | ECs3998 | Z4470  | tdcA | DNA-binding transcriptional activator                                           |
| G2583_3841             | ECs3999 | Z4471  | tdcR | Threonine dehydratase operon activator protein                                  |
| G2583_3842             | ECs4000 | Z4472  | yhaB | hypothetical protein                                                            |
| G2583_3843             | ECs4001 | Z4473  | yhaC | hypothetical protein                                                            |
| G2583_3844             |         |        | -    | hypothetical protein                                                            |
|                        |         | Z4474  | -    | hypothetical protein                                                            |
| G2583_3845             | rnpB    | RNA083 | rnpB | ncRNA                                                                           |

Table S10. The orthologue table of the O55 and O157 strains Page 130

| Locus_tag <sup>a</sup> |         |        | Gene | Product                                                           |
|------------------------|---------|--------|------|-------------------------------------------------------------------|
| CB9615                 | Sakai   | EDL933 |      |                                                                   |
| G2583_3846             | ECs4002 | Z4476  | garK | hypothetical protein                                              |
| G2583_3847             | ECs4003 | Z4477  | garR | 2-hydroxy-3-oxopropionate reductase                               |
| G2583_3848             | ECs4004 | Z4478  | garL | 2-dehydro-3-deoxyglucarate aldolase                               |
| G2583_3849             | ECs4005 | Z4479  | garP | Probable galactarate transporter                                  |
| G2583_3850             | ECs4006 | Z4480  | garD | Galactarate dehydratase                                           |
| G2583_3851             | ECs4007 | Z4481  | sohA | HtrA suppressor protein                                           |
| G2583_3852             | ECs4008 | Z4482  | yhaV | hypothetical protein                                              |
| G2583_3853             | ECs4009 | Z4483  | agaR | Putative aga operon transcriptional repressor                     |
| G2583_3854             | ECs4010 | Z4484  | kbaZ | D-tagatose-bisphosphate aldolase, class II, non-catalytic subunit |
| G2583_3855             | ECs4011 | Z4485  | agaV | N-acetylgalactosamine-specific PTS system enzyme IIB component    |
| G2583_3856             | ECs4012 | Z4486  | agaW | Putative phosphotransferase system enzyme subunit                 |
| G2583_3857             | ECs4013 | Z4487  | agaE | PTS system N-acetylgalactosamine-specific, IID component          |
| G2583_3858             | ECs4014 | Z4488  | agaF | PTS system, mannose/sorbose-specific, IIA component               |
| G2583_3859             | ECs4015 | Z4489  | agaA | N-acetylgalactosamine-6-phosphate deacetylase                     |
| G2583_3860             | ECs4016 | Z4490  | agaS | Putative sugar isomerase, AgaS family                             |
| G2583_3861             | ECs4017 | Z4491  | kbaY | Tagatose-1,6-bisphosphate aldolase kbaY                           |
| G2583_3862             | ECs4018 | Z4492  | agaB | PTS system, D galactosamine-specific, IIB component               |
| G2583_3863             | ECsp020 | Z4493  | agaC | N-acetylgalactosamine permease IIC component 1                    |
| G2583_3864             | ECs4019 | Z4494  | agaD | N-acetylglucosamine transport enzyme IID component 1              |
| G2583_3865             |         | Z4495  | agal | putative galactosamine-6-phosphate isomerase                      |
| G2583_3865             | ECsp021 | Z4497  | agal | putative galactosamine-6-phosphate isomerase                      |
| G2583_3866             | ECs4020 | Z4498  | yraH | Putative type 1 fimbrial protein                                  |
| G2583_3867             | ECs4021 | Z4499  | yraI | Gram-negative pili assembly chaperone protein                     |
| G2583_3868             | ECs4022 | Z4500  | yraJ | Fimbrial usher family protein                                     |
| G2583_3869             | ECs4023 | Z4501  | yraK | Putative fimbrial protein                                         |
| Indel-175              | ECs4024 | Z4502  | -    | putative transposase OrfA protein of insertion sequence IS629     |
| Indel-175              | ECs4025 | Z4503  | -    | putative transposase OrfB protein of insertion sequence IS629     |
| G2583_3869             | ECs4026 | Z4504  | yraK | Putative fimbrial protein                                         |
| G2583_3870             | ECs4027 | Z4505  | yraL | UPF0011 protein yraL                                              |
| G2583_3871             | ECs4028 | Z4506  | yraM | hypothetical protein                                              |
| G2583_3872             | ECs4029 | Z4507  | yraN | UPF0102 protein yraN                                              |
| G2583_3873             | ECs4030 | Z4508  | diaA | DnaA initiator-associating protein diaA                           |
| G2583_3874             | ECs4031 | Z4509  | yraP | hypothetical protein                                              |
| G2583_3875             | ECs4032 | Z4510  | yraQ | Putative permease                                                 |
| G2583_3876             | ECs4033 | Z4511  | yraR | hypothetical protein                                              |
| G2583_3877             | ECs4034 | Z4512  | yhbO | hypothetical protein                                              |
| G2583_3878             | ECs4035 | Z4514  | yhbP | UPF0306 protein yhbP                                              |
| G2583_3879             | ECs4036 | Z4516  | yhbQ | UPF0213 protein yhbQ                                              |
| G2583_3880             | ECs4037 | Z4517  | yhbS | Uncharacterized acetyltransferase yhbS                            |

Table S10. The orthologue table of the O55 and O157 strains Page 131

| Locus_tag <sup>a</sup> |         |        | Gene | Product                                                              |
|------------------------|---------|--------|------|----------------------------------------------------------------------|
| CB9615                 | Sakai   | EDL933 |      |                                                                      |
| G2583_3881             | ECs4038 | Z4518  | yhbT | hypothetical protein                                                 |
| G2583_3882             | ECs4039 | Z4519  | yhbU | Peptidase, U32 family                                                |
| G2583_3883             | ECs4040 | Z4520  | yhbV | hypothetical protein                                                 |
| G2583_3884             | ECs4041 | Z4521  | yhbW | Monoxygenase, luciferase family                                      |
| G2583_3885             | ECs4042 | Z4522  | mtr  | Tryptophan-specific transport protein                                |
| G2583_3886             | ECs4043 | Z4523  | deaD | Cold-shock DEAD-box protein A                                        |
| G2583_3887             | ECs4044 | Z4524  | nlpl | Lipoprotein nlpl precursor                                           |
| G2583_3888             | ECs4045 | Z4525  | pnp  | Polynucleotide phosphorylase/polyadenylase                           |
| G2583_3889             |         |        | -    | ncRNA                                                                |
| G2583_3890             | ECs4046 | Z4526  | rpsO | 30S ribosomal protein S15                                            |
| G2583_3891             | ECs4047 | Z4527  | truB | tRNA pseudouridine synthase B                                        |
| G2583_3892             | ECs4048 | Z4528  | rbfA | Ribosome-binding factor A                                            |
| G2583_3893             | ECs4049 | Z4529  | infB | Translation initiation factor IF-2                                   |
| G2583_3894             | ECs4050 | Z4530  | nusA | Transcription elongation protein nusA                                |
| G2583_3895             | ECs4051 | Z4531  | yhbC | hypothetical protein                                                 |
| G2583_3896             | metY    | RNA084 | metY | Met tRNA                                                             |
| G2583_3897             | ECs4052 | Z4534  | argG | Argininosuccinate synthase                                           |
| G2583_3898             | ECs4053 | Z4535  | yhbX | Outer-membrane protein yhbX                                          |
| G2583_3899             | leuU    | RNA085 | leuU | Leu tRNA                                                             |
| G2583_3900             | ECs4054 | Z4537  | secG | Preprotein translocase IISP family, auxillary membrane component     |
| G2583_3901             | ECs4055 | Z4538  | glmM | Phosphoglucosamine mutase                                            |
| G2583_3902             | ECs4056 | Z4539  | folP | 7,8-dihydropteroate synthase                                         |
| G2583_3903             | ECs4057 | Z4540  | hflB | Cell division protease ftsH                                          |
| G2583_3904             | ECs4058 | Z4541  | rrmJ | Ribosomal RNA large subunit methyltransferase J                      |
| G2583_3905             | ECs4059 | Z4542  | yhbY | hypothetical protein                                                 |
| G2583_3906             | ECs4060 | Z4543  | greA | Transcription elongation factor greA                                 |
| G2583_3907             | ECs4061 | Z4544  | dacB | D-alanyl-D-alanine carboxypeptidase/D-alanyl-D-alanine-endopeptidase |
| G2583_3908             | ECs4062 | Z4545  | obgE | GTP-binding protein Obg/CgtA                                         |
| G2583_3909             | ECs4063 | Z4546  | yhbE | Uncharacterized inner membrane transporter yhbE                      |
| G2583_3910             | ECs4064 | Z4547  | rpmA | 50S ribosomal protein L27                                            |
| G2583_3911             | ECs4065 | Z4549  | rplU | 50S ribosomal protein L21                                            |
| G2583_3912             | ECs4066 | Z4550  | ispB | hypothetical protein                                                 |
| G2583_3913             | ECs4067 | Z4551  | sfsB | Sugar fermentation stimulation protein B                             |
| G2583_3914             | ECs4068 | Z4552  | murA | UDP-N-acetylglucosamine 1-carboxyvinyltransferase                    |
| G2583_3915             | ECs4069 | Z4553  | yrbA | Predicted transcriptional regulator, BolA superfamily                |
| G2583_3916             | ECs4070 | Z4554  | yrbB | hypothetical protein                                                 |
| G2583_3917             | ECs4071 | Z4555  | yrbC | Toluene tolerance protein Ttg2D                                      |
| G2583_3918             | ECs4072 | Z4556  | yrbD | hypothetical protein                                                 |
| G2583_3919             | ECs4073 | Z4557  | yrbE | UPF0393 inner membrane protein yrbE                                  |
| G2583_3920             | ECs4074 | Z4558  | yrbF | Uncharacterized ABC transporter ATP-binding protein yrbF             |
| G2583_3921             | ECs4075 | Z4559  | yrbG | Sodium/calcium exchanger protein                                     |

Table S10. The orthologue table of the O55 and O157 strains Page 132

| Locus_tag <sup>a</sup> |         |        | Gene | Product                                                    |
|------------------------|---------|--------|------|------------------------------------------------------------|
| CB9615                 | Sakai   | EDL933 |      |                                                            |
| G2583_3922             | ECs4076 | Z4560  | kdsD | Arabinose 5-phosphate isomerase                            |
| G2583_3923             | ECs4077 | Z4561  | kdsC | 3-deoxy-D-manno-octulosonate 8-phosphate                   |
| G2583_3924             | ECs4078 | Z4562  | yrbK | hypothetical protein                                       |
| G2583_3925             | ECs4079 | Z4563  | lptA | Protein yhbN precursor                                     |
| G2583_3926             | ECs4080 | Z4564  | lptB | Uncharacterized ABC transporter ATP-binding protein yhbG   |
| G2583_3927             | ECs4081 | Z4565  | rpoN | RNA polymerase sigma-54 factor                             |
| G2583_3928             | ECs4082 | Z4566  | hpf  | Probable sigma(54) modulation protein                      |
| G2583_3929             | ECs4083 | Z4567  | ptsN | PTS IIA-like nitrogen-regulatory protein PtsN              |
| G2583_3930             | ECs4084 | Z4568  | yhbJ | UPF0042 protein yhbJ                                       |
| G2583_3931             | ECs4085 | Z4569  | npr  | Phosphocarrier protein NPr                                 |
| G2583_3932             | ECs4086 | Z4570  | yrbL | hypothetical protein                                       |
| G2583_3933             | ECs4087 | Z4571  | mtgA | Monofunctional biosynthetic peptidoglycan transglycosylase |
| G2583_3934             | ECs4088 | Z4573  | elbB | Sigma cross-reacting protein 27A                           |
| G2583_3935             |         |        | -    | ncRNA                                                      |
| G2583_3936             | ECs4089 | Z4574  | arcB | Aerobic respiration control sensor protein arcB            |
| G2583_3937             | ECs4090 | Z4575  | yhcC | hypothetical protein                                       |
| G2583_3938             | ECs4091 | Z4576  | gltB | Glutamate synthase (NADPH), large subunit                  |
| G2583_3939             | ECs4092 | Z4577  | gltD | Glutamate synthase (NADPH), small subunit                  |
| G2583_3940             | ECs4093 | Z4578  | yhcG | conserved hypothetical protein                             |
| G2583_3941             | ECs4094 | Z4579  | yhcH | hypothetical protein                                       |
| G2583_3942             | ECs4095 | Z4580  | nanK | N-acetylmannosamine kinase                                 |
| G2583_3943             | ECs4096 | Z4581  | nanE | Putative N-acetylmannosamine-6-phosphate 2-                |
| G2583_3944             | ECs4097 | Z4582  | nanT | Sialic acid transporter                                    |
| G2583_3945             | ECs4098 | Z4583  | nanA | N-acetylneuraminase lyase                                  |
| G2583_3946             | ECs4099 | Z4584  | nanR | Transcriptional regulators                                 |
| G2583_3947             | ECs4100 | Z4585  | dcuD | Putative C4-dicarboxylate carrier protein                  |
| G2583_3948             | ECs4101 | Z4586  | sspB | Stringent starvation protein B                             |
| G2583_3949             | ECs4102 | Z4587  | sspA | Stringent starvation protein A                             |
| G2583_3950             | ECs4103 | Z4588  | rpsI | 30S ribosomal protein S9                                   |
| G2583_3951             | ECs4104 | Z4589  | rplM | 50S ribosomal protein L13                                  |
| G2583_3952             | ECs4105 | Z4591  | yhcM | hypothetical protein                                       |
| G2583_3953             | ECs4106 | Z4592  | yhcB | hypothetical protein                                       |
| G2583_3954             | ECs4107 | Z4593  | degQ | Serine peptidase DegQ                                      |
| G2583_3955             | ECs4108 | Z4594  | degS | Protease degS precursor                                    |
| G2583_3956             | ECs4109 | Z4595  | mdh  | Malate dehydrogenase                                       |
| G2583_3957             | ECs4110 | Z4596  | argR | Arginine repressor                                         |
| G2583_3958             | ECs4111 | Z4597  | yhcN | hypothetical protein                                       |
| G2583_3959             | ECs4112 | Z4598  | yhcO | hypothetical protein                                       |
| G2583_3960             | ECs4113 | Z4599  | aaeB | p-hydroxybenzoic acid efflux pump subunit aaeB             |
| G2583_3961             | ECs4114 | Z4600  | aaeA | p-hydroxybenzoic acid efflux pump subunit aaeA             |
| G2583_3962             | ECs4115 | Z4601  | aaeX | hypothetical protein                                       |
| G2583_3963             | ECs4116 | Z4602  | aaeR | putative DNA-binding transcriptional regulator             |

Table S10. The orthologue table of the O55 and O157 strains Page 133

| Locus_tag <sup>a</sup> |         |        | Gene | Product                                                                    |
|------------------------|---------|--------|------|----------------------------------------------------------------------------|
| CB9615                 | Sakai   | EDL933 |      |                                                                            |
| G2583_3964             | ECs4117 | Z4603  | tldD | suppresses inhibitory activity of CsrA                                     |
| G2583_3965             | ECs4118 | Z4604  | yhdP | hypothetical protein                                                       |
| G2583_3966             | ECs4119 | Z4605  | rng  | Ribonuclease G                                                             |
| G2583_3967             | ECs4120 | Z4606  | yhdE | Maf-like protein yhdE                                                      |
| G2583_3968             | ECs4121 | Z4607  | mreD | Rod shape-determining protein                                              |
| G2583_3969             | ECs4122 | Z4609  | mreC | Rod shape-determining protein MreC                                         |
| G2583_3970             | ECs4123 | Z4610  | mreB | Rod shape-determining protein mreB                                         |
| G2583_3971             | ECs4124 | Z4611  | csrD | Cyclic diguanylate phosphodiesterase (EAL) domain                          |
| G2583_3972             | ECs4125 | Z4612  | yhdH | Quinone oxidoreductase, YhdH family                                        |
| G2583_3973             | ECs4126 | Z4613  | -    | hypothetical protein                                                       |
|                        |         | Z4614  | -    | hypothetical protein                                                       |
| G2583_3974             | ECs4127 | Z4615  | accB | acetyl-CoA carboxylase, biotin carboxyl carrier protein                    |
| G2583_3975             | ECs4128 | Z4616  | accC | Acetyl CoA carboxylase, biotin carboxylase subunit                         |
| G2583_3976             | ECs4129 | Z4617  | yhdT | hypothetical protein                                                       |
| G2583_3977             | ECs4130 | Z4618  | panF | Sodium/pantothenate symporter                                              |
| G2583_3978             | ECs4131 | Z4619  | prmA | Ribosomal protein L11 methyltransferase                                    |
| G2583_3979             | ECs4132 | Z4620  | dusB | tRNA-dihydrouridine synthase B                                             |
| G2583_3980             | ECs4133 | Z4621  | fis  | DNA-binding protein fis                                                    |
| G2583_3981             | ECs4134 | Z4622  | yhdJ | DNA methylase, N4/N6-methyltransferase family                              |
| G2583_3982             | ECs4135 | Z4623  | yhdU | hypothetical protein                                                       |
| G2583_3983             | ECs4136 | Z4624  | envR | Probable acrEF/envCD operon repressor                                      |
| G2583_3984             | ECs4137 | Z4625  | acrE | Acriflavine resistance protein E                                           |
| G2583_3985             | ECs4138 | Z4626  | acrF | Transporter, hydrophobe/amphiphile efflux-1 (HAE1) family precursor        |
| G2583_3985             | ECs4139 | Z4627  | acrF | Transporter, hydrophobe/amphiphile efflux-1 (HAE1) family precursor        |
| G2583_3986             | ECs4140 | Z4628  | yhdV | hypothetical protein                                                       |
| G2583_3987             | ECs4141 | Z4629  | yhdW | Putative amino-acid ABC transporter-binding protein yhdW precursor         |
| G2583_3988             | ECs4142 | Z4630  | yhdX | Amino acid ABC transporter, permease protein, His/Glu/Gln/Arg/opine family |
| G2583_3989             | ECs4143 | Z4631  | yhdY | general L-amino acid transport system permease protein AapM                |
| G2583_3990             | ECs4144 | Z4632  | yhdZ | Amino acid ABC transporter, ATP-binding protein                            |
| G2583_3991             | rrfF    | RNA086 | rrf  | 5S ribosomal RNA                                                           |
| G2583_3992             | thrV    | RNA087 | thrV | Thr tRNA                                                                   |
| G2583_3993             | rrfD    | RNA088 | rrf  | 5S ribosomal RNA                                                           |
| G2583_3994             | rrlD    | RNA089 | rrl  | 23S ribosomal RNA                                                          |
| G2583_3995             | alaU    | RNA090 | alaU | Ala tRNA                                                                   |
| G2583_3996             | ileU    | RNA091 | ileU | Ile tRNA                                                                   |
| G2583_3997             | rrsD    | RNA092 | rrs  | 16S ribosomal RNA                                                          |
| G2583_3998             | ECs4145 | Z4650  | yrdA | hypothetical protein                                                       |
| G2583_3999             | ECs4146 | Z4651  | yrdB | hypothetical protein                                                       |
| G2583_4000             | ECs4147 | Z4652  | aroE | Shikimate dehydrogenase                                                    |

Table S10. The orthologue table of the O55 and O157 strains Page 134

| Locus_tag <sup>a</sup> |         |        | Gene | Product                                                             |
|------------------------|---------|--------|------|---------------------------------------------------------------------|
| CB9615                 | Sakai   | EDL933 |      |                                                                     |
| G2583_4001             | ECs4148 | Z4653  | rimN | Sua5/YciO/YrdC/YwC family protein                                   |
| G2583_4002             | ECs4149 | Z4654  | yrdD | predicted DNA topoisomerase                                         |
| G2583_4003             | ECs4150 | Z4655  | smg  | hypothetical protein                                                |
| G2583_4004             | ECs4151 | Z4656  | smf  | hypothetical protein                                                |
| G2583_4005             | ECs4152 | Z4657  | def  | Peptide deformylase                                                 |
| G2583_4006             | ECs4153 | Z4658  | fmt  | Methionyl-tRNA formyltransferase                                    |
| G2583_4007             | ECs4154 | Z4659  | rsmB | Ribosomal RNA small subunit methyltransferase B                     |
| G2583_4008             | ECs4155 | Z4660  | trkA | Trk system potassium uptake protein trkA (K(+)-uptake protein trkA) |
| G2583_4009             | ECs4156 | Z4661  | mscL | Large-conductance mechanosensitive channel                          |
| G2583_4010             | ECs4157 | Z4662  | zntR | zinc-responsive transcriptional regulator                           |
| G2583_4011             | ECs4158 | Z4663  | yhdN | hypothetical protein                                                |
| G2583_4012             | ECs4159 | Z4664  | rplQ | 50S ribosomal protein L17                                           |
| G2583_4013             | ECs4160 | Z4665  | rpoA | DNA-directed RNA polymerase subunit alpha                           |
| G2583_4014             | ECs4161 | Z4666  | rpsD | 30S ribosomal protein S4                                            |
| G2583_4015             | ECs4162 | Z4667  | rpsK | 30S ribosomal protein S11                                           |
| G2583_4016             | ECs4163 | Z4668  | rpsM | 30S ribosomal protein S13                                           |
| G2583_4017             | ECs4164 | Z4669  | rpmJ | ribosomal protein L36                                               |
| G2583_4018             | ECs4165 | Z4670  | secY | Preprotein translocase subunit secY                                 |
| G2583_4019             | ECs4166 | Z4671  | rplO | 50S ribosomal protein L15                                           |
| G2583_4020             | ECs4167 | Z4672  | rpmD | 50S ribosomal protein L30                                           |
| G2583_4021             | ECs4168 | Z4673  | rpsE | 30S ribosomal protein S5                                            |
| G2583_4022             | ECs4169 | Z4674  | rplR | 50S ribosomal protein L18                                           |
| G2583_4023             | ECs4170 | Z4675  | rplF | 50S ribosomal protein L6                                            |
| G2583_4024             | ECs4171 | Z4676  | rpsH | 30S ribosomal protein S8                                            |
| G2583_4025             | ECs4172 | Z4677  | rpsN | 30S ribosomal protein S14                                           |
| G2583_4026             | ECs4173 | Z4678  | rplE | 50S ribosomal protein L5                                            |
| G2583_4027             | ECs4174 | Z4679  | rplX | 50S ribosomal protein L24                                           |
| G2583_4028             | ECs4175 | Z4680  | rplN | 50S ribosomal protein L14                                           |
| G2583_4029             | ECs4176 | Z4681  | rpsQ | 30S ribosomal protein S17                                           |
| G2583_4030             | ECs4177 | Z4683  | rpmC | 50S ribosomal protein L29                                           |
| G2583_4031             | ECs4178 | Z4684  | rplP | 50S ribosomal protein L16                                           |
| G2583_4032             | ECs4179 | Z4685  | rpsC | 30S ribosomal protein S3                                            |
| G2583_4033             | ECs4180 | Z4686  | rplV | 50S ribosomal protein L22                                           |
| G2583_4034             | ECs4181 | Z4687  | rpsS | 30S ribosomal protein S19                                           |
| G2583_4035             | ECs4182 | Z4688  | rplB | 50S ribosomal protein L2                                            |
| G2583_4036             | ECs4183 | Z4689  | rplW | 50S ribosomal protein L23                                           |
| G2583_4037             | ECs4184 | Z4690  | rplD | 50S ribosomal protein L4                                            |
| G2583_4038             | ECs4185 | Z4691  | rplC | 50S ribosomal protein L3                                            |
| G2583_4039             | ECs4186 | Z4692  | rpsJ | Ribosomal protein S10                                               |
| G2583_4040             | ECs4187 |        | -    | hypothetical protein                                                |
| G2583_4041             | ECs4188 | Z4693  | gspO | Peptidase, A24 (Type IV prepilin peptidase) family                  |
| G2583_4042             | ECs4189 | Z4695  | bfr  | Bacterioferritin                                                    |
| G2583_4043             |         | Z4696  | bfd  | Bacterioferritin-associated ferredoxin                              |

Table S10. The orthologue table of the O55 and O157 strains Page 135

| Locus_tag <sup>a</sup> |         |        | Gene | Product                                                                                                                |
|------------------------|---------|--------|------|------------------------------------------------------------------------------------------------------------------------|
| CB9615                 | Sakai   | EDL933 |      |                                                                                                                        |
| G2583_4044             | ECs4190 | Z4697  | tufA | Elongation factor Tu 1                                                                                                 |
| G2583_4045             | ECs4191 | Z4698  | fusA | Elongation factor G                                                                                                    |
| G2583_4046             | ECs4192 | Z4699  | rpsG | 30S ribosomal protein S7                                                                                               |
| G2583_4047             | ECs4193 | Z4700  | rpsL | Ribosomal protein S12                                                                                                  |
| G2583_4048             | ECs4194 | Z4701  | yheL | sulfur relay protein TusD/DsrH                                                                                         |
| G2583_4049             | ECs4195 | Z4702  | yheM | hypothetical protein                                                                                                   |
| G2583_4050             | ECs4196 | Z4703  | yheN | Sulfurtransferase tusD                                                                                                 |
| G2583_4051             | ECs4197 | Z4704  | yheO | hypothetical protein                                                                                                   |
| G2583_4052             | ECs4198 | Z4705  | fkpA | FKBP-type peptidyl-prolyl cis-trans isomerase fkpA precursor                                                           |
| G2583_4053             | ECs4199 | Z4706  | slyX | slyX protein                                                                                                           |
| G2583_4054             | ECs4200 | Z4707  | slyD | FKBP-type peptidyl-prolyl cis-trans isomerase SlyD                                                                     |
| G2583_4055             |         | Z4708  | yheV | hypothetical protein                                                                                                   |
| G2583_4056             | ECs4201 | Z4710  | kefB | Glutathione-regulated potassium-efflux system protein kefB (K+)/H(+) antiporter) (NEM-activatable K+)/H(+) antiporter) |
| G2583_4057             | ECs4202 | Z4712  | kefG | Glutathione-regulated potassium-efflux system ancillary protein kefG                                                   |
| G2583_4058             | ECs4203 | Z4713  | yheS | Uncharacterized ABC transporter ATP-binding protein yheS                                                               |
| G2583_4059             | ECs4204 | Z4714  | yheT | Hydrolase, alpha/beta fold family                                                                                      |
| G2583_4060             | ECs4205 | Z4715  | yheU | UPF0270 protein yheU                                                                                                   |
| G2583_4061             | ECs4206 | Z4716  | prkB | Phosphoribulokinase/uridine kinase family protein                                                                      |
| G2583_4062             | ECs4207 | Z4717  | yhfA | Protein yhfA                                                                                                           |
| G2583_4063             | ECs4208 | Z4718  | crp  | Catabolite gene activator                                                                                              |
| G2583_4064             | ECs4209 | Z4719  | yhfK | integral membrane protein, YccS/YhfK family                                                                            |
| G2583_4065             | ECs4210 | Z4720  | argD | Acetylornithine/succinyldiaminopimelate                                                                                |
| G2583_4066             | ECs4211 | Z4721  | pabA | Aminodeoxychorismate synthase, component II                                                                            |
| G2583_4067             | ECs4212 | Z4722  | fic  | Cell filamentation protein Fic                                                                                         |
| G2583_4068             | ECs4213 | Z4723  | yhfG | hypothetical protein                                                                                                   |
| G2583_4069             | ECs4214 | Z4724  | ppiA | Peptidyl-prolyl cis-trans isomerase                                                                                    |
| G2583_4070             | ECs4215 | Z4725  | tsgA | hypothetical protein                                                                                                   |
| G2583_4071             | ECs4216 | Z4726  | nirB | Nitrite reductase [NAD(P)H], large subunit                                                                             |
| G2583_4072             | ECs4217 | Z4727  | nirD | Nitrite reductase [NAD(P)H] large subunit                                                                              |
| G2583_4073             | ECs4218 | Z4728  | nirC | Response regulator receiver protein                                                                                    |
| G2583_4074             | ECs4219 | Z4729  | cysG | Siroheme synthase [Includes: Uroporphyrinogen-III C-methyltransferase                                                  |
| G2583_4075             | ECs4220 | Z4730  | yhfL | putative lipoprotein                                                                                                   |
| G2583_4076             | ECs4221 | Z4731  | frlA | Amino acid transporters                                                                                                |
| G2583_4077             | ECs4222 | Z4732  | frlB | SIS family protein                                                                                                     |
| G2583_4078             | ECs4223 | Z4733  | frlC | predicted isomerase                                                                                                    |
| G2583_4079             | ECs4224 | Z4734  | -    | hypothetical protein                                                                                                   |
| G2583_4079             |         | Z4735  | -    | hypothetical protein                                                                                                   |
| G2583_4080             | ECs4225 | Z4736  | frlR | GntR-family transcriptional regulator FrIR                                                                             |

Table S10. The orthologue table of the O55 and O157 strains Page 136

| Locus_tag <sup>a</sup> |         |        | Gene | Product                                           |
|------------------------|---------|--------|------|---------------------------------------------------|
| CB9615                 | Sakai   | EDL933 |      |                                                   |
| G2583_4081             | ECs4226 | Z4737  | trpS | Tryptophanyl-tRNA synthetase                      |
| G2583_4082             | ECs4227 | Z4738  | gph  | Phosphoglycolate phosphatase                      |
| G2583_4083             | ECs4228 | Z4739  | rpe  | Ribulose-phosphate 3-epimerase                    |
| G2583_4084             | ECs4229 | Z4740  | dam  | DNA adenine methylase                             |
| G2583_4085             | ECs4230 | Z4741  | damX | Uncharacterized protein conserved in bacteria     |
| G2583_4086             | ECs4231 | Z4742  | aroB | 3-dehydroquinate synthase                         |
| G2583_4087             | ECs4232 | Z4743  | aroK | Shikimate kinase                                  |
| G2583_4088             | ECs4233 | Z4744  | hofQ | predicted fimbrial transporter                    |
| G2583_4089             | ECs4234 | Z4746  | hofP | hypothetical protein                              |
| G2583_4089             | ECs4235 | Z4747  | hofP | hypothetical protein                              |
| G2583_4090             | ECs4236 | Z4748  | hofN | PilN family protein                               |
| G2583_4091             | ECs4237 | Z4749  | hofM | hypothetical protein                              |
| G2583_4092             | ECs4238 | Z4750  | mrcA | Penicillin-binding protein 1A                     |
| G2583_4093             | ECs4239 | Z4751  | nudE | ADP compounds hydrolase NudE                      |
| G2583_4094             | ECs4240 | Z4752  | yrfF | hypothetical protein                              |
| G2583_4095             | ECs4241 | Z4753  | yrfG | Putative phosphatase                              |
| G2583_4096             | ECs4242 | Z4754  | hsIR | Heat shock protein 15                             |
| G2583_4097             | ECs4243 | Z4755  | hsIO | Disulfide bond chaperones of the HSP33 family     |
| G2583_4098             | ECs4244 | Z4756  | yhgE | putative transport                                |
| G2583_4099             |         | Z4757  | -    | hypothetical protein                              |
| G2583_4100             | ECs4245 | Z4758  | pck  | Phosphoenolpyruvate carboxykinase [ATP]           |
| G2583_4101             | ECs4246 | Z4759  | envZ | Osmolarity sensor protein envZ                    |
| G2583_4102             | ECs4247 | Z4760  | ompR | hypothetical protein                              |
| G2583_4103             | ECs4248 | Z4761  | greB | Transcription elongation factor greB              |
| G2583_4104             | ECs4249 | Z4762  | yhgF | protein yhgF                                      |
| G2583_4105             | ECs4250 | Z4763  | feoA | Ferrous iron transport protein A                  |
| G2583_4106             | ECs4251 | Z4764  | feoB | Ferrous iron transport protein B                  |
| G2583_4107             | ECs4252 | Z4765  | feoC | conserved hypothetical protein                    |
| G2583_4108             | ECs4253 | Z4766  | yhgA | hypothetical protein                              |
| G2583_4109             | ECs4255 | Z4767  | bioH | Carboxylesterase bioH                             |
| G2583_4110             | ECs4254 | Z4768  | gntX | gluconate periplasmic binding protein             |
| G2583_4111             | ECs4256 | Z4769  | gntY | Fe/S biogenesis protein nfuA                      |
| G2583_4112             | ECs4257 | Z4770  | gntT | High-affinity gluconate transporter               |
| G2583_4113             | ECs4258 | Z4771  | malQ | 4-alpha-gluconotransferase                        |
| G2583_4114             | ECs4259 | Z4772  | malP | Maltodextrin phosphorylase                        |
|                        |         | Z4773  | -    | hypothetical protein                              |
| G2583_4115             | ECs4260 | Z4774  | malT | transcriptional regulator MalT                    |
| G2583_4116             |         | Z4775  | -    | hypothetical protein                              |
| G2583_4117             | ECs4261 | Z4776  | -    | hypothetical protein                              |
| G2583_4118             | ECs4262 | Z4777  | -    | Acetyltransferase, gnat family                    |
| G2583_4119             | ECs4263 | Z4778  | rtcA | RNA 3'-terminal phosphate cyclase                 |
| G2583_4120             | ECs4264 | Z4779  | rtcB | RtcB protein                                      |
| G2583_4121             | ECs4265 | Z4780  | rtcR | Sigma-54 dependent transcriptional regulator RtcR |
| G2583_4122             | ECs4266 | Z4781  | glpR | Glycerol-3-phosphate regulon repressor            |



Table S10. The orthologue table of the O55 and O157 strains Page 137

| Locus_tag <sup>a</sup> |         |        | Gene | Product                                                                        |
|------------------------|---------|--------|------|--------------------------------------------------------------------------------|
| CB9615                 | Sakai   | EDL933 |      |                                                                                |
| G2583_4123             | ECs4267 | Z4784  | glpG | Rhomboid protease glpG                                                         |
| G2583_4124             | ECs4268 | Z4785  | glpE | Thiosulfate sulfurtransferase glpE                                             |
| G2583_4125             | ECs4269 | Z4786  | glpD | Glycerol-3-phosphate dehydrogenase                                             |
| G2583_4126             | ECs4270 | Z4787  | -    | hypothetical protein                                                           |
| G2583_4127             | ECs4271 | Z4788  | -    | hypothetical protein                                                           |
| G2583_4128             | ECs4272 | Z4789  | yzgL | Hypothetical membrane protein                                                  |
| G2583_4129             | ECs4273 | Z4790  | glgP | Glycogen phosphorylase                                                         |
| G2583_4130             | ECs4274 | Z4791  | glgA | Glycogen synthase                                                              |
| G2583_4131             | ECs4275 | Z4792  | glgC | Glucose-1-phosphate adenylyltransferase                                        |
| G2583_4132             | ECs4276 | Z4794  | glgX | Glycogen debranching enzyme                                                    |
| G2583_4133             | ECs4277 | Z4796  | glgB | 1,4-alpha-glucan-branching enzyme                                              |
| G2583_4134             | ECs4278 | Z4797  | asd  | Aspartate-semialdehyde dehydrogenase                                           |
| G2583_4135             | ECs4279 | Z4798  | yhgN | UPF0056 inner membrane protein yhgN                                            |
| G2583_4136             | ECs4280 | Z4799  | -    | Putative DNA processing protein                                                |
| G2583_4137             | ECs4281 |        | -    | putative ATP-dependent DNA helicase                                            |
| G2583_4137             | ECs4282 | Z4801  | -    | putative ATP-dependent DNA helicase                                            |
| G2583_4137             | ECs4283 | Z4802  | -    | putative ATP-dependent DNA helicase                                            |
| G2583_4137             | ECs4284 | Z4803  | -    | putative ATP-dependent DNA helicase                                            |
| G2583_4137             | ECs4283 |        | -    | putative ATP-dependent DNA helicase                                            |
| G2583_4138             | ECs4285 | Z4804  | gntU | H <sup>+</sup> /gluconate symporter and related permeases                      |
| G2583_4139             | ECs4286 | Z4805  | gntK | Thermoresistant gluconokinase                                                  |
| G2583_4140             | ECs4287 | Z4806  | gntR | regulator of gluconate operon                                                  |
| G2583_4141             | ECs4288 | Z4807  | yhhW | hypothetical protein                                                           |
| G2583_4142             | ECs4289 | Z4808  | yhhX | Oxidoreductase, NAD-binding                                                    |
| G2583_4143             |         |        | -    | ncRNA                                                                          |
| G2583_4144             | ECs4290 | Z4809  | yhhY | Acetyltransferase, GNAT family                                                 |
| G2583_4145             | ECs4291 | Z4810  | -    | hypothetical protein                                                           |
| G2583_4146             | ECs4292 | Z4811  | -    | hypothetical protein                                                           |
| G2583_4147             | ECs4293 | Z4813  | ggt  | Gamma-glutamyltranspeptidase                                                   |
| G2583_4148             | ECs4294 | Z4815  | yhhA | hypothetical protein                                                           |
| G2583_4149             | ECs4295 | Z4817  | ugpQ | Glycerophosphodiester phosphodiesterase, cytosolic                             |
| G2583_4150             | ECs4296 | Z4818  | ugpC | sn-glycerol-3-phosphate import ATP-binding protein                             |
| G2583_4151             | ECs4297 | Z4819  | ugpE | sn-glycerol-3-phosphate transport system permease protein ugpe                 |
| G2583_4152             | ECs4298 | Z4820  | ugpA | sn-glycerol-3-phosphate transport system permease protein ugpa                 |
| G2583_4153             | ECs4299 | Z4822  | ugpB | sn-glycerol-3-phosphate-binding periplasmic protein ugpb precursor             |
| G2583_4154             | ECs4300 | Z4823  | -    | hypothetical protein                                                           |
| G2583_4155             | ECs4301 | Z4824  | livF | ATP-binding component of leucine transport                                     |
| G2583_4156             | ECs4302 | Z4825  | livG | High-affinity branched-chain amino acid transport ATP-binding protein livG     |
| G2583_4157             | ECs4303 | Z4826  | livM | High-affinity branched-chain amino acid ABC transporter, permease protein LivM |

Table S10. The orthologue table of the O55 and O157 strains Page 138

| Locus_tag <sup>a</sup> |         |        | Gene | Product                                                                                               |
|------------------------|---------|--------|------|-------------------------------------------------------------------------------------------------------|
| CB9615                 | Sakai   | EDL933 |      |                                                                                                       |
| G2583_4158             | ECs4304 | Z4827  | livH | High-affinity branched-chain amino acid transport system permease protein livH                        |
| G2583_4159             | ECs4305 | Z4829  | livK | High-affinity branched-chain amino acid ABC transporter, periplasmic leucine-specific-binding protein |
| G2583_4160             | ECs4306 | Z4831  | yhhK | Acetyltransferase, GNAT family                                                                        |
| G2583_4161             | ECs4307 | Z4832  | -    | hypothetical protein                                                                                  |
| G2583_4162             | ECs4308 | Z4833  | -    | hypothetical protein                                                                                  |
| G2583_4163             | ECs4309 | Z4834  | livJ | High-affinity amino acid transport protein, periplasmic binding protein                               |
| G2583_4164             | ECs4310 | Z4835  | rpoH | RNA polymerase sigma factor                                                                           |
| G2583_4165             | ECs4311 | Z4836  | ftsX | Cell division protein ftsX                                                                            |
| G2583_4166             | ECs4312 | Z4837  | ftsE | Cell division ATP-binding protein ftsE                                                                |
| G2583_4167             | ECs4313 | Z4838  | ftsY | Cell division protein FtsY                                                                            |
| G2583_4168             | ECs4314 | Z4839  | rsmD | 16S rRNA methyltransferase RsmD                                                                       |
| G2583_4169             | ECs4315 | Z4840  | yhhL | hypothetical protein                                                                                  |
| G2583_4170             | ECs4316 | Z4841  | yhhM | putative receptor                                                                                     |
| G2583_4171             | ECs4317 | Z4842  | yhhN | Uncharacterized membrane protein yhhN                                                                 |
| G2583_4172             | ECs4318 | Z4843  | zntA | Cadmium-translocating P-type ATPase                                                                   |
| G2583_4173             | ECs4319 | Z4844  | sirA | Sulfurtransferase tusA                                                                                |
| G2583_4174             | ECs4320 | Z4845  | yhhQ | hypothetical protein                                                                                  |
| G2583_4175             | ECs4321 | Z4846  | dcrB | hypothetical protein                                                                                  |
| G2583_4176             | ECs4322 | Z4847  | yhhS | Transporter, major facilitator family                                                                 |
| G2583_4177             | ECs4323 | Z4848  | yhhT | hypothetical protein                                                                                  |
| G2583_4178             | ECs4324 | Z4849  | -    | hypothetical protein                                                                                  |
| G2583_4179             | ECs4325 | Z4850  | -    | O-methyltransferase, family 2                                                                         |
| G2583_4180             | ECs4326 | Z4851  | -    | Beta-ketoacyl synthase domain protein                                                                 |
| G2583_4181             | ECs4327 | Z4852  | -    | Putative phospholipid biosynthesis acyltransferase                                                    |
| G2583_4182             | ECs4328 | Z4853  | -    | Acyl carrier protein                                                                                  |
| G2583_4183             | ECs4329 | Z4854  | acyl | acyl carrier protein                                                                                  |
| G2583_4184             | ECs4330 | Z4855  | -    | DNA gyrase subunit B                                                                                  |
| G2583_4185             | ECs4331 | Z4856  | -    | Putative surfactin synthetase                                                                         |
| G2583_4186             | ECs4332 | Z4857  | -    | hypothetical protein                                                                                  |
| G2583_4187             | ECs4333 | Z4858  | -    | Glycosyl transferase, family 2                                                                        |
| G2583_4188             | ECs4334 | Z4859  | -    | Thioesterase superfamily protein                                                                      |
| G2583_4189             | ECs4335 | Z4860  | -    | Outer membrane lipoprotein carrier protein LolA                                                       |
| G2583_4190             | ECs4336 | Z4861  | -    | hypothetical protein                                                                                  |
| G2583_4191             | ECs4337 | Z4862  | -    | hypothetical protein                                                                                  |
| G2583_4192             | ECs4338 | Z4863  | -    | 3-oxoacyl-(acyl carrier protein) synthase I                                                           |
| G2583_4193             | ECs4339 | Z4864  | -    | FabA-like domain protein                                                                              |
| G2583_4194             | ECs4340 | Z4865  | fabG | Putative 3-oxoacyl-(Acyl-carrier-protein) reductase                                                   |
| G2583_4195             | ECs4341 | Z4866  | -    | Beta-ketoacyl synthase                                                                                |
| G2583_4196             | ECs4342 | Z4867  | acpT | 4'-phosphopantetheinyl transferase acpT                                                               |
| G2583_4197             | ECs4343 | Z4868  | nikA | Nickel ABC transporter, periplasmic nickel-binding protein NikA                                       |

Table S10. The orthologue table of the O55 and O157 strains Page 139

| Locus_tag <sup>a</sup> |         |        | Gene | Product                                                           |
|------------------------|---------|--------|------|-------------------------------------------------------------------|
| CB9615                 | Sakai   | EDL933 |      |                                                                   |
| G2583_4198             | ECs4344 | Z4869  | nikB | Nickel transport system permease protein nikB                     |
| G2583_4199             | ECs4345 | Z4870  | nikC | Nickel transport system permease protein nikC                     |
| G2583_4200             | ECs4346 | Z4871  | nikD | Nickel import ATP-binding protein nikD                            |
| G2583_4201             | ECs4347 | Z4872  | nikE | Nickel import ATP-binding protein nikE                            |
| G2583_4202             | ECs4348 | Z4873  | nikR | Nickel-responsive regulator                                       |
| G2583_4203             | ECs4349 | Z4874  | -    | putative regulator                                                |
| G2583_4204             | ECs4350 | Z4875  | -    | PEP-dependent sugar transporting PTS family, IIA component        |
| G2583_4205             | ECs4351 | Z4876  | -    | PEP-dependent sugar transporting PTS family, IIB component        |
| G2583_4206             | ECs4352 | Z4877  | -    | PEP-dependent sugar transporting PTS family, IIC component        |
| G2583_4207             | ECs4353 | Z4878  | -    | Carbohydrate kinase, FGGY family                                  |
| G2583_4208             | ECs4354 | Z4879  | -    | Phosphocarrier, HPr family                                        |
| G2583_4209             | ECs4355 | Z4881  | gatY | Fructose-bisphosphate aldolase, class II                          |
| G2583_4210             | ECs4356 | Z4882  | hicB | HicB family protein                                               |
| G2583_4211             | ECs4357 | Z4883  | HicA | HicA-like protein                                                 |
| G2583_4212             | ECs4358 | Z4884  | yhhJ | hypothetical protein                                              |
| G2583_4213             | ECs4359 | Z4885  | rbbA | ABC transporter, ATP binding protein                              |
| G2583_4214             | ECs4360 | Z4886  | yhiI | Auxiliary transport protein, membrane fusion protein (MFP) family |
| G2583_4215             | ECs4361 | Z4887  | yhiJ | hypothetical protein                                              |
| G2583_4216             | ECs4362 | Z4888  | yhiL | hypothetical protein                                              |
| G2583_4217             | ECs4363 | Z4890  | yhiM | Inner membrane protein yhiM                                       |
| G2583_4218             | ECs4364 | Z4891  | yhiN | Pyridine nucleotide-disulfide oxidoreductase family               |
| G2583_4219             | ECs4365 | Z4893  | pitA | Low-affinity inorganic phosphate transporter 1                    |
| G2583_4220             | ECs4366 | Z4894  | uspB | Universal stress protein B                                        |
| G2583_4221             | ECs4367 | Z4895  | uspA | Universal stress protein A                                        |
| G2583_4222             | ECs4368 | Z4896  | yhiP | Hypothetical transporter YhiP                                     |
| G2583_4223             | ECs4369 | Z4897  | yhiQ | UPF0341 protein yhiQ                                              |
| G2583_4224             | ECs4370 | Z4898  | prlC | Oligopeptidase A                                                  |
| G2583_4225             | ECs4371 | Z4899  | yhiR | DNA utilization protein YhiR                                      |
| G2583_4226             | ECs4372 | Z4900  | gor  | Glutathione-disulfide reductase                                   |
| G2583_4227             | ECs4373 | Z4903  | arsR | Arsenical resistance operon repressor                             |
| G2583_4228             | ECs4374 | Z4904  | arsB | Arsenical pump membrane protein                                   |
| G2583_4229             | ECs4375 | Z4905  | arsC | Arsenate reductase                                                |
| G2583_4230             |         | Z4906  | -    | hypothetical protein                                              |
| G2583_4231             | ECs4376 | Z4907  | yhiS | hypothetical protein                                              |
| G2583_4232             | ECs4377 | Z4908  | slp  | Outer membrane lipoprotein, Slp family                            |
| G2583_4233             | ECs4378 | Z4909  | dctR | hypothetical protein                                              |
| G2583_4234             | ECs4379 | Z4910  | chuS | Hemin transport protein HmuS                                      |
| G2583_4235             | ECs4380 | Z4911  | chuA | Outer membrane heme/hemoglobin receptor ChuA                      |
| G2583_4236             | ECs4381 | Z4912  | -    | hypothetical protein                                              |
| G2583_4237             | ECs4382 | Z4913  | chuT | Putative periplasmic binding protein                              |

Table S10. The orthologue table of the O55 and O157 strains Page 140

| Locus_tag <sup>a</sup> |         |        | Gene | Product                                                       |
|------------------------|---------|--------|------|---------------------------------------------------------------|
| CB9615                 | Sakai   | EDL933 |      |                                                               |
| G2583_4238             | ECs4383 | Z4914  | chuW | Putative coproporphyrinogen III oxidase                       |
| G2583_4239             | ECs4384 | Z4915  | chuX | hypothetical protein                                          |
| G2583_4240             | ECs4385 | Z4917  | chuY | hypothetical protein                                          |
| G2583_4241             | ECs4386 | Z4918  | chuU | Putative permease of iron compound ABC transport system       |
| G2583_4242             | ECs4387 | Z4919  | shuV | Hemin import ATP-binding protein hmuV                         |
| G2583_4243             | ECs4388 | Z4920  | yhiD | putative Mg <sup>2+</sup> transporter-C (MgtC) family protein |
| G2583_4244             | ECs4389 | Z4921  | hdeB | acid-resistance protein                                       |
| G2583_4245             | ECs4390 | Z4922  | hdeA | Chaperone-like protein hdeA precursor                         |
| G2583_4246             | ECs4391 | Z4923  | hdeD | acid-resistance membrane protein                              |
| G2583_4247             | ECs4392 | Z4925  | gadE | hypothetical protein                                          |
| G2583_4248             | ECs4393 | Z4926  | mdtE | Multidrug resistance protein mdtE precursor                   |
| G2583_4249             | ECs4394 | Z4927  | mdtF | Multidrug resistance protein mdtF                             |
| G2583_4250             | ECs4395 | Z4928  | gadW | putative ARAC-type regulatory protein                         |
| G2583_4251             |         |        | -    | ncRNA                                                         |
| G2583_4252             | ECs4396 | Z4929  | gadX | DNA-binding transcriptional dual regulator                    |
| G2583_4253             | ECs4397 | Z4930  | gadA | Glutamate decarboxylase alpha                                 |
| G2583_4254             | ECs4398 | Z4931  | yhjA | Di-haem cytochrome c peroxidase family protein                |
| G2583_4255             | ECs4399 | Z4932  | treF | Cytoplasmic trehalase                                         |
| G2583_4256             | ECs4400 | Z4933  | yhjB | Putative HTH-type transcriptional regulator yhjB              |
| G2583_4257             | ECs4401 | Z4934  | yhjC | putative transcriptional regulator LYSR-type                  |
| G2583_4258             | ECs4402 | Z4935  | yhjD | Putative ribonuclease                                         |
| G2583_4259             | ECs4403 | Z4936  | yhjE | Inner membrane metabolite transport protein yhjE              |
| G2583_4260             | ECs4404 | Z4937  | yhjG | hypothetical protein                                          |
| G2583_4261             | ECs4405 | Z4939  | yhjH | Cyclic diguanylate phosphodiesterase                          |
| G2583_4262             | ECs4406 | Z4940  | kdgK | Ketodeoxygluconokinase                                        |
| G2583_4263             | ECs4407 | Z4941  | yhjJ | Predicted Zn-dependent peptidases                             |
| G2583_4264             | ECs4408 | Z4942  | dctA | C4-dicarboxylate transport protein                            |
| G2583_4265             | ECs4409 | Z4943  | yhjK | Putative diguanylate cyclase                                  |
| G2583_4266             | ECs4410 | Z4944  | bcsC | Cellulose synthase operon protein C                           |
| G2583_4266             |         | Z4945  | bcsC | Cellulose synthase operon protein C                           |
| G2583_4267             | ECs4411 | Z4946  | bcsZ | Endoglucanase precursor                                       |
| G2583_4268             | ECs4412 | Z4947  | bcsB | Cyclic di-GMP binding protein                                 |
| G2583_4269             | ECs4413 | Z4948  | bcsA | Cellulose synthase catalytic subunit [UDP-forming]            |
| G2583_4270             | ECs4414 | Z4949  | yhjQ | ATPases involved in chromosome partitioning                   |
| G2583_4270             |         | Z4950  | yhjQ | ATPases involved in chromosome partitioning                   |
| G2583_4271             | ECs4415 | Z4951  | yhjR | hypothetical protein                                          |
| G2583_4272             | ECs4416 | Z4952  | bcsE | Putative protease                                             |
| G2583_4273             | ECs4417 | Z4953  | bcsF | hypothetical protein                                          |
| G2583_4274             | ECs4418 | Z4954  | bcsG | hypothetical protein                                          |
| G2583_4275             |         | Z4955  | ldrD | hypothetical protein                                          |
| G2583_4276             | ECs4419 | Z4956  | yhjV | Serine transporter family protein                             |
| G2583_4277             | ECs4420 | Z4957  | dppF | ABC-type oligopeptide transport system, ATPase component      |

Table S10. The orthologue table of the O55 and O157 strains Page 141

| Locus_tag <sup>a</sup> |         |        | Gene  | Product                                                                         |
|------------------------|---------|--------|-------|---------------------------------------------------------------------------------|
| CB9615                 | Sakai   | EDL933 |       |                                                                                 |
| G2583_4278             | ECs4421 | Z4958  | dppD  | Dipeptide transport ATP-binding protein dppD                                    |
| G2583_4279             | ECs4422 | Z4959  | dppC  | Dipeptide transport system permease protein dppC                                |
| G2583_4280             | ECs4423 | Z4960  | dppB  | Dipeptide transport system permease protein dppB                                |
| G2583_4281             | ECs4424 | Z4961  | dppA  | Dipeptide ABC transporter, periplasmic dipeptide-binding protein                |
| G2583_4282             | proK    | RNA093 | proK  | Pro tRNA                                                                        |
| G2583_4283             | ECs4425 | Z4964  | eptB  | hypothetical protein                                                            |
| G2583_4284             | ECs4426 | Z4965  | lpfE  | putative fimbrial subunit                                                       |
| G2583_4285             | ECs4427 | Z4966  | lpfD  | putative fimbrial protein                                                       |
| G2583_4286             | ECs4428 | Z4967  | fimD  | PapC-like porin protein involved in fimbrial biogenesis                         |
| G2583_4286             | ECs4429 | Z4968  | fimD  | PapC-like porin protein involved in fimbrial biogenesis                         |
| G2583_4287             | ECs4430 | Z4969  | lpfB  | Putative fimbrial chaperone                                                     |
| G2583_4288             | ECs4431 | Z4971  | lpfA  | Putative major fimbrial subunit                                                 |
| G2583_4289             | ECs4432 | Z4972  | yhjX  | Inner membrane protein YhjX                                                     |
| G2583_4290             | ECs4433 | Z4973  | yhjY  | Putative lipase                                                                 |
| G2583_4291             | ECs4434 | Z4974  | tag   | 3-methyladenine DNA glycosylase I                                               |
| G2583_4292             | ECs4435 | Z4975  | yaC   | Acetyltransferase, GNAT family                                                  |
| G2583_4293             | ECs4436 | Z4976  | bisC  | Biotin sulfoxide reductase                                                      |
| G2583_4294             | ECs4437 | Z4977  | yaD   | Inner membrane lipoprotein yaD precursor                                        |
| G2583_4295             | ECs4438 | Z4978  | ghrB  | 2-ketogluconate reductase                                                       |
| G2583_4296             | ECs4439 | Z4979  | yaF   | hypothetical protein                                                            |
| G2583_4297             | ECs4440 | Z4980  | yaG   | putative transcriptional regulator                                              |
| G2583_4298             | ECs4441 | Z4981  | cspA  | Cold shock protein cspA                                                         |
| G2583_4299             |         | Z4982  | hokA  | small toxic polypeptide                                                         |
| G2583_4300             | ECs4442 | Z4983  | glyS  | Glycyl-tRNA synthetase beta subunit                                             |
| G2583_4301             | ECs4443 | Z4984  | glyQ  | Glycyl-tRNA synthetase alpha subunit                                            |
| G2583_4302             |         | Z4985  | ysaB  | Uncharacterized lipoprotein ysaB precursor                                      |
| G2583_4303             | ECs4444 | Z4986  | wechH | Acyltransferase family protein                                                  |
| G2583_4304             | ECs4445 | Z4987  | yaA   | Inner membrane protein yaA                                                      |
| G2583_4305             | ECs4446 | Z4988  | yaB   | hypothetical protein                                                            |
| G2583_4306             | ECs4447 | Z4989  | xylB  | Xylulokinase                                                                    |
| G2583_4307             | ECs4448 | Z4990  | xylA  | Xylose isomerase                                                                |
| G2583_4308             | ECs4449 | Z4991  | xylF  | Xylose binding protein transport system                                         |
| G2583_4309             | ECs4450 | Z4992  | xylG  | Xylose import ATP-binding protein xylG                                          |
| G2583_4310             | ECs4451 | Z4993  | xylH  | Xylose transport system permease protein xylH                                   |
| G2583_4311             | ECs4452 | Z4994  | xylR  | Xylose operon regulatory protein                                                |
| G2583_4312             | ECs4453 | Z4995  | bax   | hypothetical protein                                                            |
| G2583_4313             | ECs4454 | Z4996  | malS  | Alpha-amylase, periplasmic                                                      |
| G2583_4314             | ECs4455 | Z4997  | avtA  | Alanine-alpha-ketoisovalerate (Or valine-pyruvate) transaminase, transaminase C |
| G2583_4315             | ECs4456 | Z4998  | ysaA  | 4Fe-4S binding domain protein                                                   |
|                        |         | Z4999  | -     | hypothetical protein                                                            |
| G2583_4316             | ECs4457 | Z5000  | -     | AraC-type DNA-binding domain-containing protein                                 |
| G2583_4317             | ECs4458 | Z5001  | -     | Sugar transporter, glycoside-pentoside-hexuronide                               |

Table S10. The orthologue table of the O55 and O157 strains Page 142

| Locus_tag <sup>a</sup> |           |        | Gene | Product                                                              |
|------------------------|-----------|--------|------|----------------------------------------------------------------------|
| CB9615                 | Sakai     | EDL933 |      |                                                                      |
| G2583_4318             | ECs4459   | Z5002  | -    | hypothetical protein                                                 |
| G2583_4319             | ECs4460   | Z5003  | yiaT | Putative outer membrane protein yiaT precursor                       |
| G2583_4320             | ECs4461   | Z5004  | yiaU | Transcriptional regulator                                            |
| G2583_4321             | ECs4462   | Z5006  | yiaV | Auxiliary transport protein, membrane fusion protein family          |
| G2583_4322             | ECs4463   | Z5007  | yiaW | Inner membrane protein yiaW                                          |
| G2583_4323             | ECs4464   | Z5008  | aldB | Aldehyde dehydrogenase B                                             |
| G2583_4324             | ECs4465   | Z5009  | -    | Fic family protein                                                   |
| G2583_4325             | ECs4466   | Z5010  | yiaY | Alcohol dehydrogenase II                                             |
| G2583_4326             | ECs4467   | Z5011  | selB | Selenocysteine-specific translation elongation factor                |
| G2583_4327             | ECs4468   | Z5012  | selA | L-seryl-tRNA(Sec) selenium transferase                               |
| G2583_4328             | ECs4469   | Z5013  | yibF | Glutathione S-transferase                                            |
| G2583_4329             | ECs4470   | Z5014  | rhsA | Rhs family protein                                                   |
| Indel-182              | Indel-182 | Z5015  | yibA | hypothetical protein                                                 |
| G2583_4330             | ECs4470   | Z5017  | yibJ | Rhs family protein                                                   |
| G2583_4331             | ECs4471   | Z5018  | yibG | hypothetical protein                                                 |
| G2583_4332             | ECs4472   |        | yibV | hypothetical protein                                                 |
| G2583_4333             | ECs4473   | Z5021  | yibH | Inner membrane protein yibH                                          |
| G2583_4334             | ECs4474   | Z5022  | yibI | hypothetical protein                                                 |
| G2583_4335             | ECs4475   | Z5023  | mtIA | PTS system, mannitol-specific IIABC component                        |
| G2583_4336             | ECs4476   | Z5024  | mtID | Mannitol-1-phosphate dehydrogenase                                   |
| G2583_4337             | ECs4477   | Z5025  | mtIR | Mannitol operon repressor                                            |
| G2583_4338             | ECs4478   | Z5026  | yibL | conserved hypothetical protein                                       |
| G2583_4339             |           | Z5027  | -    | hypothetical protein                                                 |
| G2583_4340             | ECs4479   | Z5028  | -    | putative lipoprotein                                                 |
| G2583_4341             | ECs4480   | Z5029  | -    | Putative adhesin                                                     |
| G2583_4342             | ECs4481   | Z5030  | lldP | L-lactate permease                                                   |
| G2583_4343             | ECs4482   | Z5031  | lldR | Putative L-lactate dehydrogenase operon regulatory protein           |
| G2583_4344             | ECs4483   | Z5032  | lldD | L-lactate dehydrogenase [cytochrome]                                 |
| G2583_4345             | ECs4484   | Z5033  | yibK | RNA methyltransferase, TrmH family, group 2                          |
| G2583_4346             | ECs4485   | Z5034  | cysE | Serine acetyltransferase                                             |
| G2583_4347             | ECs4486   | Z5035  | gpsA | Glycerol-3-phosphate dehydrogenase [NAD(P)+]                         |
| G2583_4348             | ECs4487   | Z5036  | secB | Protein-export protein secB                                          |
| G2583_4349             | ECs4488   | Z5037  | grxC | Glutaredoxin-3                                                       |
| G2583_4350             | ECs4489   | Z5038  | yibN | hypothetical protein                                                 |
| G2583_4351             | ECs4490   | Z5039  | gpmM | Putative 2,3-bisphosphoglycerate-independent phosphoglycerate mutase |
| G2583_4352             | ECs4491   | Z5040  | envC | hypothetical protein                                                 |
| G2583_4353             | ECs4492   | Z5041  | yibQ | Uncharacterized protein conserved in bacteria                        |
| G2583_4354             | ECs4493   | Z5042  | yibD | Putative regulator                                                   |
| G2583_4355             | ECs4494   | Z5043  | tdh  | L-threonine 3-dehydrogenase                                          |
| G2583_4356             | ECs4495   | Z5044  | kbl  | 2-amino-3-ketobutyrate CoA ligase                                    |
| G2583_4357             | ECs4496   | Z5045  | htrL | Involved in lipopolysaccharide biosynthesis                          |

Table S10. The orthologue table of the O55 and O157 strains Page 143

| Locus_tag <sup>a</sup> |         |        | Gene | Product                                                                         |
|------------------------|---------|--------|------|---------------------------------------------------------------------------------|
| CB9615                 | Sakai   | EDL933 |      |                                                                                 |
| G2583_4358             | ECs4497 | Z5046  | rfaD | ADP-L-glycero-D-manno-heptose-6-epimerase                                       |
| G2583_4359             | ECs4498 | Z5047  | rfaF | Lipopolysaccharide heptosyltransferase II                                       |
| G2583_4360             | ECs4499 | Z5048  | rfaC | Lipopolysaccharide heptosyltransferase I                                        |
| G2583_4361             | ECs4500 | Z5049  | waaL | Lipid A-core:surface polymer ligase WaaL                                        |
| G2583_4362             | ECs4501 | Z5050  | waaD | Lipopolysaccharide 1,2-N-acetylglucosaminetransferase                           |
| G2583_4363             | ECs4502 | Z5051  | rfaJ | Lipopolysaccharide 1,2-glucosyltransferase                                      |
| G2583_4364             | ECs4503 | Z5052  | rfaY | lipopolysaccharide core biosynthesis protein                                    |
| G2583_4365             | ECs4504 | Z5053  | rfaI | Lipopolysaccharide 1,3-galactosyltransferase                                    |
| G2583_4366             | ECs4505 | Z5054  | rfaP | Lipopolysaccharide core biosynthesis protein RfaP                               |
| G2583_4367             | ECs4506 | Z5055  | rfaG | Lipopolysaccharide core biosynthesis protein RfaG                               |
| G2583_4368             | ECs4507 | Z5056  | rfaQ | Lipopolysaccharide core biosynthesis protein                                    |
| G2583_4369             | ECs4508 | Z5057  | waaA | Kdo transferase WaaA                                                            |
| G2583_4370             | ECs4509 | Z5058  | coaD | Phosphopantetheine adenylyltransferase                                          |
| G2583_4371             | ECs4510 | Z5059  | mutM | Formamidopyrimidine-DNA glycosylase                                             |
| G2583_4372             | ECs4511 | Z5060  | rpmG | 50S ribosomal protein L33                                                       |
| G2583_4373             | ECs4512 | Z5061  | rpmB | 50S ribosomal protein L28                                                       |
| G2583_4374             | ECs4513 | Z5062  | yicR | DNA repair proteins                                                             |
| G2583_4375             | ECs4514 | Z5063  | dfp  | Dfp                                                                             |
| G2583_4376             | ECs4515 | Z5064  | dut  | Deoxyuridine 5'-triphosphate nucleotidohydrolase                                |
| G2583_4377             | ECs4516 | Z5065  | slmA | HTH-type protein slmA                                                           |
| G2583_4378             | ECs4517 | Z5066  | pyrE | Orotate phosphoribosyltransferase                                               |
| G2583_4379             | ECs4518 | Z5068  | rph  | Ribonuclease PH                                                                 |
| G2583_4380             | ECs4519 | Z5069  | yicC | Uncharacterized stress-induced protein                                          |
| G2583_4381             | ECs4520 | Z5070  | dinD | Pyridoxine biosynthesis enzyme                                                  |
| G2583_4382             | ECs4521 | Z5071  | yicG | hypothetical protein                                                            |
| G2583_4383             | ECs4522 | Z5073  | ligB | DNA ligase B                                                                    |
| G2583_4384             | ECs4523 | Z5074  | gmk  | Guanylate kinase                                                                |
| G2583_4385             | ECs4524 | Z5075  | rpoZ | DNA-directed RNA polymerase, subunit K/omega                                    |
| G2583_4386             | ECs4525 | Z5076  | spoT | Guanosine-3',5'-bis(diphosphate) 3'-                                            |
| G2583_4387             | ECs4526 | Z5077  | trmH | tRNA guanosine-2'-O-methyltransferase                                           |
| G2583_4388             | ECs4527 | Z5078  | recG | ATP-dependent DNA helicase recG                                                 |
| G2583_4389             | ECs4528 | Z5079  | -    | hypothetical protein                                                            |
| G2583_4390             | ECs4529 | Z5081  | gltS | Glutamate transport protein                                                     |
| G2583_4391             | ECs4530 | Z5082  | yicE | Putative purine permease yicE                                                   |
| G2583_4392             | ECs4531 | Z5083  | yicH | hypothetical protein                                                            |
| G2583_4393             | ECs4532 | Z5084  | yicI | Alpha-xylosidase                                                                |
| G2583_4394             | ECs4533 | Z5085  | yicJ | Sugar transporter, glycoside-pentoside-hexuronide (GPH):cation symporter family |
| G2583_4395             | selC    | RNA094 | selC | Sec tRNA                                                                        |
| G2583_4396             | ECs4534 | Z5087  | intL | CP4-like integrase                                                              |
| G2583_4397             | ECs4535 | Z5088  | insN | unknown protein encoded by IS911 within prophage CP-933L                        |
|                        | ECs4536 |        | -    | hypothetical protein                                                            |
| G2583_4398             | ECs4537 | Z5089  | -    | putative transposase                                                            |

Table S10. The orthologue table of the O55 and O157 strains Page 144

| Locus_tag <sup>a</sup> |         |        | Gene | Product                                                        |
|------------------------|---------|--------|------|----------------------------------------------------------------|
| CB9615                 | Sakai   | EDL933 |      |                                                                |
| G2583_4399             | ECs4538 |        | YeeU | hypothetical protein                                           |
| G2583_4400             | ECs4539 | Z5091  | yeeV | unknown protein encoded within prophage CP-933L                |
| G2583_4401             | ECs4540 | Z5092  | -    | unknown protein encoded within prophage CP-933L                |
| G2583_4402             | ECs4541 | Z5093  | -    | hypothetical protein                                           |
| G2583_4403             | ECs4542 | Z5094  | -    | hypothetical protein                                           |
| G2583_4403             | ECs4543 |        | -    | hypothetical protein                                           |
| G2583_4403             | ECs4544 | Z5095  | -    | hypothetical protein                                           |
| Indel-184              | ECs4545 | Z5096  | -    | hypothetical protein                                           |
| Indel-184              | ECs4546 | Z5097  | -    | hypothetical protein                                           |
| Indel-184              | ECs4547 | Z5098  | -    | hypothetical protein                                           |
| G2583_4404             | ECs4548 |        | -    | hypothetical protein                                           |
|                        | ECs4549 |        | -    | hypothetical protein                                           |
| G2583_4405             | ECs4550 | Z5100  | espF | espF                                                           |
| G2583_4406             | ECs4551 | Z5102  | -    | hypothetical protein                                           |
| G2583_4407             | ECs4552 | Z5103  | EscF | Type III secretion apparatus needle protein                    |
| G2583_4408             | ECs4553 | Z5104  | -    | hypothetical protein                                           |
| G2583_4409             | ECs4554 | Z5105  | espB | Secreted protein EspB                                          |
| G2583_4410             | ECs4555 | Z5106  | espD | secreted protein EspD                                          |
| G2583_4411             | ECs4556 | Z5107  | espA | espA                                                           |
| G2583_4412             | ECs4557 | Z5108  | sepL | SepL                                                           |
| G2583_4413             | ECs4558 | Z5109  | EscD | Pas                                                            |
| G2583_4414             | ECs4559 | Z5110  | eae  | Gamma intimin                                                  |
| G2583_4415             | ECs4560 | Z5111  | CesT | Tir chaperone                                                  |
| G2583_4416             | ECs4561 | Z5112  | tir  | Translocated intimin receptor Tir                              |
| G2583_4417             | ECs4562 | Z5113  | ipgB | hypothetical protein                                           |
| G2583_4418             | ECs4563 | Z5114  | -    | hypothetical protein                                           |
| G2583_4419             | ECs4564 | Z5115  | -    | hypothetical protein                                           |
| G2583_4420             | ECs4565 | Z5116  | SepQ | sepQ                                                           |
| G2583_4421             | ECs4566 | Z5117  | -    | hypothetical protein                                           |
| G2583_4422             | ECs4567 | Z5118  | -    | hypothetical protein                                           |
| G2583_4423             | ECs4568 | Z5119  | escN | escN                                                           |
| G2583_4424             | ECs4569 | Z5120  | escV | escV                                                           |
| G2583_4425             | ECs4570 | Z5121  | -    | hypothetical protein                                           |
| G2583_4426             | ECs4571 | Z5122  | sepZ | SepZ                                                           |
| G2583_4427             | ECs4572 | Z5123  | -    | hypothetical protein                                           |
| G2583_4428             | ECs4573 | Z5124  | EscJ | EscJ                                                           |
| G2583_4429             | ECs4574 | Z5125  | SepD | hypothetical protein                                           |
| G2583_4430             | ECs4575 | Z5126  | EscC | escC                                                           |
| G2583_4431             | ECs4576 | Z5127  | cesD | Type III secretion low calcium response chaperone<br>LcrH/SycD |
| G2583_4432             | ECs4577 | Z5128  | -    | hypothetical protein                                           |
| G2583_4433             | ECs4578 | Z5129  | -    | hypothetical protein                                           |
| G2583_4434             | ECs4579 | Z5131  | -    | transglycosylase SLT domain                                    |
| G2583_4435             | ECs4580 | Z5132  | escU | secretion system apparatus protein SsaU                        |



Table S10. The orthologue table of the O55 and O157 strains Page 145

| Locus_tag <sup>a</sup> |         |        | Gene | Product                                                     |
|------------------------|---------|--------|------|-------------------------------------------------------------|
| CB9615                 | Sakai   | EDL933 |      |                                                             |
| G2583_4436             | ECs4581 | Z5133  | EscT | escT                                                        |
| G2583_4437             | ECs4582 | Z5134  | EscS | EscS                                                        |
| G2583_4438             | ECs4583 | Z5135  | escR | Type III secretion system EscR protein                      |
| G2583_4439             | ECs4584 | Z5136  | -    | hypothetical protein                                        |
| G2583_4440             | ECs4585 | Z5137  | -    | hypothetical protein                                        |
| G2583_4441             | ECs4586 | Z5138  | -    | hypothetical protein                                        |
| G2583_4442             | ECs4587 | Z5139  | -    | type III secretion system protein, YseE family              |
| G2583_4443             | ECs4588 | Z5140  | -    | hypothetical protein                                        |
|                        | ECs4589 |        | -    | hypothetical protein                                        |
| G2583_4444             | ECs4590 | Z5142  | EspG | hypothetical protein                                        |
| G2583_4445             | ECs4591 | Z5143  | -    | hypothetical protein                                        |
| G2583_4446             | ECs4592 |        | -    | conserved hypothetical protein                              |
| G2583_4447             | ECs4593 |        | -    | hypothetical protein                                        |
| G2583_4448             | ECs4594 | Z5146  | yicL | YicL                                                        |
| G2583_4449             | ECs4595 | Z5147  | nlpA | Lipoprotein 28 precursor                                    |
| G2583_4450             |         | Z5148  | yicS | hypothetical protein                                        |
| G2583_4451             | ECs4596 | Z5149  | nepl | Major facilitator family transporter                        |
| G2583_4452             | ECs4597 | Z5150  | -    | hypothetical protein                                        |
| G2583_4453             | ECs4598 | Z5151  | -    | Putative DNA-binding protein                                |
| G2583_4454             | ECs4599 | Z5152  | yicN | hypothetical protein                                        |
| G2583_4455             | ECs4600 | Z5153  | yicO | Inorganic anion transporter, sulfate permease (SulP) family |
| G2583_4455             | ECs4601 | Z5154  | yicO | Inorganic anion transporter, sulfate permease (SulP) family |
| G2583_4456             | ECs4602 | Z5155  | ade  | Adenine deaminase                                           |
| G2583_4457             | ECs4603 | Z5156  | uhpT | Hexose phosphate transport protein                          |
| G2583_4458             | ECs4604 | Z5157  | uhpC | Regulator of uhpT                                           |
| G2583_4459             | ECs4605 | Z5158  | uhpB | sensory histidine kinase UhpB                               |
| G2583_4460             | ECs4606 | Z5159  | uhpA | transcriptional regulatory protein UhpA                     |
| G2583_4461             | ECs4607 | Z5160  | -    | hypothetical protein                                        |
| G2583_4461             | ECs4608 | Z5161  | -    | hypothetical protein                                        |
| G2583_4462             | ECs4609 | Z5162  | -    | hypothetical protein                                        |
| G2583_4463             | ECs4610 | Z5163  | -    | hypothetical protein                                        |
| G2583_4464             | ECs4611 | Z5164  | ilvN | Acetolactate synthase isozyme 1 small subunit               |
| G2583_4465             | ECs4612 | Z5165  | ilvB | Acetolactate synthase, large subunit, isozyme I             |
| G2583_4466             |         |        | -    | hypothetical protein                                        |
| G2583_4467             | ECs4613 | Z5166  | ivbL | ilvBN operon leader peptide                                 |
| G2583_4468             | ECs4614 | Z5168  | emrD | Multidrug resistance protein D                              |
| G2583_4469             | ECs4615 | Z5169  | yidF | putative transcriptional regulator                          |
| G2583_4470             | ECs4616 | Z5170  | yidG | Inner membrane protein yidG                                 |
| G2583_4471             | ECs4617 | Z5171  | yidH | Inner membrane protein yidH                                 |
| G2583_4472             | ECs4618 | Z5172  | yidI | hypothetical protein                                        |
| G2583_4473             | ECs4619 | Z5173  | yidJ | Sulfatase                                                   |
| G2583_4474             | ECs4620 | Z5174  | yidK | Transporter, solute:sodium symporter (SSS) family           |

Table S10. The orthologue table of the O55 and O157 strains Page 146

| Locus_tag <sup>a</sup> |         |        | Gene | Product                                            |
|------------------------|---------|--------|------|----------------------------------------------------|
| CB9615                 | Sakai   | EDL933 |      |                                                    |
| G2583_4475             | ECs4621 | Z5175  | yidL | putative ARAC-type regulatory protein              |
| G2583_4476             | ECs4622 | Z5177  | glvA | Maltose-6'-phosphate glucosidase                   |
| G2583_4477             | ECs4623 | Z5178  | glvC | PTS system arbutin-like IIC component              |
| G2583_4478             | ECs4624 | Z5179  | yidP | transcriptional regulator, GntR family             |
| G2583_4479             | ECs4625 | Z5181  | yidE | Putative transport protein yidE                    |
| G2583_4480             | ECs4626 | Z5182  | ibpB | Small heat shock protein ibpB                      |
| G2583_4481             | ECs4627 | Z5183  | ibpA | Small heat shock protein ibpA                      |
| G2583_4482             | ECs4628 | Z5184  | yidQ | hypothetical protein                               |
| G2583_4483             | ECs4629 | Z5185  | yidR | hypothetical protein                               |
| G2583_4484             | ECs4630 | Z5186  | cbrA | conserved hypothetical protein                     |
| G2583_4485             | ECs4631 | Z5187  | yidX | Putative replicase                                 |
| G2583_4486             | ECs4632 | Z5188  | yidA | Phosphatase yidA                                   |
| G2583_4487             | ECs4633 | Z5189  | yidB | hypothetical protein                               |
| G2583_4488             | ECs4634 | Z5190  | gyrB | DNA gyrase subunit B                               |
| G2583_4489             | ECs4635 | Z5191  | recF | DNA replication and repair protein recF            |
| G2583_4490             | ECs4636 | Z5192  | dnaN | DNA polymerase III subunit beta                    |
| G2583_4491             | ECs4637 | Z5193  | dnaA | Chromosomal replication initiator protein dnaA     |
| G2583_4492             | ECs4638 | Z5194  | rpmH | hypothetical protein                               |
| G2583_4493             | ECs4639 | Z5195  | rnpA | Ribonuclease P protein component                   |
| G2583_4494             | ECs4640 | Z5197  | yidC | Preprotein translocase subunit YidC                |
| G2583_4495             | ECs4641 | Z5198  | mnmE | tRNA modification GTPase trmE                      |
| G2583_4496             | ECs4642 | Z5199  | -    | ShET2 enterotoxin, N-region family                 |
| G2583_4496             | ECs4643 | Z5200  | -    | ShET2 enterotoxin, N-region family                 |
| G2583_4497             |         | Z5201  | -    | hypothetical protein                               |
| G2583_4498             | ECs4644 | Z5202  | tnaL | tryptophanase leader peptide                       |
| G2583_4499             | ECs4645 | Z5203  | tnaA | Tryptophanase                                      |
| G2583_4500             | ECs4646 | Z5204  | tnaB | Low affinity tryptophan permease                   |
| G2583_4501             | ECs4647 | Z5205  | mdtL | Multidrug resistance protein mdtL                  |
| G2583_4502             | ECs4648 | Z5206  | yidZ | DNA-binding transcriptional regulator YidZ         |
| G2583_4503             | ECs4649 | Z5207  | yieE | hypothetical protein                               |
| G2583_4504             | ECs4650 | Z5208  | yieF | hypothetical protein                               |
| G2583_4505             | ECs4651 | Z5209  | yieG | Putative membrane transport protein                |
| G2583_4506             | ECs4652 | Z5210  | yieH | HAD hydrolase, IA family                           |
| G2583_4507             | ECs4653 | Z5211  | -    | hypothetical protein                               |
| G2583_4508             | ECs4654 | Z5212  | -    | hypothetical protein                               |
| G2583_4509             | ECs4655 | Z5213  | -    | hypothetical protein                               |
| G2583_4510             | ECs4656 |        | -    | hypothetical protein                               |
| G2583_4511             | ECs4657 | Z5214  | -    | hypothetical protein                               |
| G2583_4511             | ECs4658 |        | -    | hypothetical protein                               |
| G2583_4512             |         |        | -    | hypothetical protein                               |
| G2583_4513             | ECs4659 |        | -    | hypothetical protein                               |
| G2583_4514             | ECs4660 | Z5215  | phoU | Phosphate transport system regulatory protein PhoU |
| G2583_4515             | ECs4661 | Z5216  | pstB | Phosphate import ATP-binding protein pstB          |
| G2583_4516             | ECs4662 | Z5217  | pstA | Phosphate ABC transporter, permease protein PstA   |

Table S10. The orthologue table of the O55 and O157 strains Page 147

| Locus_tag <sup>a</sup> |         |        | Gene | Product                                                                         |
|------------------------|---------|--------|------|---------------------------------------------------------------------------------|
| CB9615                 | Sakai   | EDL933 |      |                                                                                 |
| G2583_4517             | ECs4663 | Z5218  | pstC | Phosphate transport system permease protein pstC                                |
| G2583_4518             | ECs4664 | Z5219  | pstS | Phosphate ABC transporter, periplasmic phosphate-binding protein PstS           |
| G2583_4519             | ECs4665 | Z5220  | lpfD | Fimbrial family protein                                                         |
| G2583_4520             | ECs4666 | Z5221  | lpfD | Putative fimbrial protein                                                       |
| G2583_4521             | ECs4667 | Z5222  | lpfC | fimbrial usher protein                                                          |
| G2583_4522             | ECs4668 | Z5223  | stgB | Putative fimbrial chaperone                                                     |
| G2583_4523             | ECs4669 | Z5224  | stgB | Putative fimbrial chaperone                                                     |
| G2583_4524             | ECs4670 | Z5225  | lpfA | Fimbrial protein                                                                |
|                        |         | Z5226  | -    | hypothetical protein                                                            |
| G2583_4525             | ECs4671 | Z5227  | glmS | Glucosamine--fructose-6-phosphate aminotransferase [isomerizing]                |
| G2583_4526             | ECs4672 | Z5228  | glmU | Bifunctional protein glmU [Includes: UDP-N-acetylglucosamine pyrophosphorylase  |
| G2583_4527             | ECs4673 | Z5229  | atpC | ATP synthase epsilon chain                                                      |
| G2583_4528             | ECs4674 | Z5230  | atpD | ATP synthase subunit beta                                                       |
| G2583_4529             | ECs4675 | Z5231  | atpG | ATP synthase gamma chain                                                        |
| G2583_4530             | ECs4676 | Z5232  | atpA | ATP synthase subunit alpha                                                      |
| G2583_4531             | ECs4677 | Z5233  | atpH | ATP synthase delta chain                                                        |
| G2583_4532             | ECs4678 | Z5234  | atpF | ATP synthase B chain                                                            |
| G2583_4533             | ECs4679 | Z5235  | atpE | ATP synthase C chain                                                            |
| G2583_4534             | ECs4680 | Z5236  | atpB | ATP synthase A chain                                                            |
| G2583_4535             | ECs4681 | Z5238  | atpI | Membrane-bound ATP synthase                                                     |
| G2583_4536             | ECs4682 | Z5240  | gidB | Ribosomal RNA small subunit methyltransferase G                                 |
| G2583_4537             | ECs4683 | Z5241  | mnmG | tRNA uridine 5-carboxymethylaminomethyl modification enzyme gidA                |
| G2583_4538             | ECs4684 | Z5243  | miuC | flavodoxin                                                                      |
| G2583_4539             | ECs4685 | Z5244  | asnC | DNA-binding transcriptional regulator AsnC                                      |
| G2583_4540             | ECs4686 | Z5245  | asnA | Aspartate--ammonia ligase                                                       |
| G2583_4541             | ECs4687 | Z5246  | viaA | hypothetical protein                                                            |
| G2583_4542             | ECs4688 | Z5247  | ravA | ATPase ravA                                                                     |
| G2583_4543             | ECs4689 | Z5248  | kup  | Low affinity potassium transport system protein kup                             |
| G2583_4544             | ECs4690 | Z5249  | rbsD | D-ribose high-affinity transport system                                         |
| G2583_4545             | ECs4691 | Z5250  | rbsA | Ribose import ATP-binding protein rbsA                                          |
| G2583_4546             | ECs4692 | Z5251  | rbsC | Ribose transport system permease protein rbsC                                   |
| G2583_4547             | ECs4693 | Z5252  | rbsB | D-ribose-binding periplasmic protein                                            |
| G2583_4548             | ECs4694 | Z5253  | rbsK | Ribokinase                                                                      |
| G2583_4549             | ECs4695 | Z5254  | rbsR | Regulator for rbs operon                                                        |
| G2583_4550             | ECs4696 | Z5255  | hsrA | Drug resistance MFS transporter, drug:H <sup>+</sup> antiporter-1 (DHA2) family |
| G2583_4551             | ECs4697 | Z5258  | yieP | hypothetical protein                                                            |
| G2583_4552             | rrsC    | RNA095 | rrs  | 16S ribosomal RNA                                                               |
| G2583_4553             | gltU    | RNA096 | gltU | Glu tRNA                                                                        |
| G2583_4554             | rrlC    | RNA097 | rrl  | 23S ribosomal RNA                                                               |

Table S10. The orthologue table of the O55 and O157 strains Page 148

| Locus_tag <sup>a</sup> |         |           | Gene  | Product                                                                   |
|------------------------|---------|-----------|-------|---------------------------------------------------------------------------|
| CB9615                 | Sakai   | EDL933    |       |                                                                           |
| G2583_4555             | rrfC    | RNA098    | rrf   | 5S ribosomal RNA                                                          |
| G2583_4556             | aspT    | RNA099    | aspT  | Asp tRNA                                                                  |
| G2583_4557             | trpT    | RNA100    | trpT  | Trp tRNA                                                                  |
| G2583_4558             | ECs4698 | Z5275     | hdfR  | transcriptional regulator HdfR                                            |
| G2583_4559             | ECs4699 | Z5276     | yifE  | UPF0438 protein yifE                                                      |
| G2583_4560             | ECs4700 | Z5277     | yifB  | Putative 2-component regulator                                            |
| G2583_4561             | ECs4701 | Z5278     | ilvL  | ilvGMEDA operon leader peptide                                            |
| G2583_4562             | ECs4702 | Z5279     | ilvG  | Acetolactate synthase, large subunit, isozyme II                          |
| G2583_4563             | ECs4703 | Z5280     | ilvM  | Acetolactate synthase isozyme 2 small subunit                             |
| G2583_4564             | ECs4704 | Z5281     | ilvE  | Branched-chain-amino-acid aminotransferase                                |
| G2583_4565             | ECs4705 | Z5282     | ilvD  | Dihydroxy-acid dehydratase                                                |
| G2583_4566             | ECs4706 | Z5283     | ilvA  | Threonine dehydratase biosynthetic                                        |
| G2583_4567             | ECs4707 | Z5284     | ilvY  | DNA-binding transcriptional regulator IlvY                                |
| G2583_4568             | ECs4708 | Z5285     | ilvC  | Ketol-acid reductoisomerase                                               |
| G2583_4569             | ECs4709 | Z5286     | ppiC  | Peptidyl-prolyl cis-trans isomerase C                                     |
| G2583_4570             | ECs4710 | Z5287     | yifO  | hypothetical protein                                                      |
| G2583_4571             | ECs4711 | Z5288     | rep   | ATP-dependent DNA helicase Rep                                            |
| G2583_4572             | ECs4712 | Z5289     | gpp   | Guanosine-5'-triphosphate,3'-diphosphate pyrophosphatase                  |
| G2583_4573             | ECs4713 | Z5290     | rhIB  | ATP-dependent RNA helicase RhIB                                           |
| G2583_4574             | ECs4714 | Z5291     | trxA  | thioredoxin TrxA                                                          |
| G2583_4575             | ECs4715 | Z5292     | rhoL  | rho operon leader peptide                                                 |
| G2583_4576             | ECs4716 | Z5293     | rho   | Transcription termination factor rho                                      |
| G2583_4577             |         | Z5294     | -     | hypothetical protein                                                      |
| G2583_4578             | ECs4717 | Z5295     | rfe   | Undecaprenyl-phosphate alpha-N-acetylglucosaminyl 1-phosphate transferase |
| G2583_4579             | ECs4718 | Z5296     | wzzE  | Lipopolysaccharide biosynthesis protein                                   |
| G2583_4580             | ECs4719 | Z5297     | rffE  | UDP-N-acetylglucosamine 2-epimerase                                       |
| G2583_4581             | ECs4720 | Z5298     | rffD  | UDP-N-acetyl-D-mannosamine dehydrogenase                                  |
| G2583_4582             | ECs4721 | Z5299     | rffG  | dTDP-glucose 4,6-dehydratase                                              |
| G2583_4583             | ECs4722 | Z5300     | rffH  | Glucose-1-phosphate thymidyltransferase                                   |
| G2583_4584             | ECs4723 | Z5301     | rffC  | TDP-D-fucosamine acetyltransferase                                        |
| G2583_4585             | ECs4724 | Z5302     | rffA  | TDP-4-oxo-6-deoxy-D-glucose transaminase                                  |
| G2583_4586             | ECs4725 | Z5303     | wzxE  | Polysaccharide biosynthesis protein                                       |
| G2583_4587             | ECs4726 | Z5304     | rffT  | TDP-Fuc4NAc:lipid II Fuc4Nac transferase                                  |
| G2583_4588             | ECs4727 | Z5305     | wzyE  | Putative ECA polymerase                                                   |
| G2583_4589             | ECs4728 | Z5306     | rffM  | Probable UDP-N-acetyl-D-mannosaminuronic acid transferase                 |
| G2583_4590             | ECs4729 | Z5307     | yifK  | Probable transport protein yifK                                           |
| G2583_4591             | argX    | RNA101    | argX  | Arg tRNA                                                                  |
| G2583_4592             | hisR    | RNA102    | hisR  | His tRNA                                                                  |
| G2583_4593             | leuT1   | RNA103    | leuT1 | Leu tRNA                                                                  |
| G2583_4594             | tRNA51  | RNA104    | -     | Pro tRNA                                                                  |
| Indel-189              | leuT2   | Indel-189 | leuT2 | Leu tRNA                                                                  |

Table S10. The orthologue table of the O55 and O157 strains Page 149

| Locus_tag <sup>a</sup> |         |           | Gene  | Product                                                                |
|------------------------|---------|-----------|-------|------------------------------------------------------------------------|
| CB9615                 | Sakai   | EDL933    |       |                                                                        |
| Indel-189              | proM2   | Indel-189 | proM2 | Pro tRNA                                                               |
| G2583_4595             | ECs4730 | Z5313     | aslB  | Arylsulfatase-activating protein AslB                                  |
| G2583_4596             | ECs4731 | Z5314     | aslA  | Arylsulfatase precursor                                                |
| G2583_4597             |         |           | -     | ncRNA                                                                  |
| G2583_4598             | ECs4732 | Z5316     | hemY  | putative protoheme IX biogenesis protein                               |
| G2583_4599             | ECs4733 | Z5317     | hemX  | Uroporphyrinogen III methylase                                         |
| G2583_4600             | ECs4734 | Z5318     | hemD  | Uroporphyrinogen-III synthase                                          |
| G2583_4601             | ECs4735 | Z5319     | hemC  | Porphobilinogen deaminase                                              |
| G2583_4602             | ECs4736 | Z5322     | cyaA  | Adenylate cyclase                                                      |
| G2583_4603             | ECs4738 | Z5323     | cyaY  | iron donor protein CyaY                                                |
| G2583_4604             | ECs4737 | Z5324     | yzcX  | hypothetical protein                                                   |
| G2583_4605             |         | Z5325     | yifL  | Uncharacterized lipoprotein yifL precursor                             |
| G2583_4606             | ECs4739 | Z5326     | dapF  | Diaminopimelate epimerase                                              |
| G2583_4607             | ECs4740 | Z5327     | yigA  | hypothetical protein                                                   |
| G2583_4608             | ECs4741 | Z5328     | xerC  | Tyrosine recombinase xerC                                              |
| G2583_4609             | ECs4742 | Z5329     | yigB  | HAD-superfamily hydrolase                                              |
| G2583_4610             | ECs4743 | Z5330     | uvrD  | DNA helicase II                                                        |
| G2583_4611             | ECs4744 | Z5331     | orf   | hypothetical protein                                                   |
| G2583_4612             | ECs4745 | Z5332     | yigE  | hypothetical protein                                                   |
| G2583_4613             | ECs4746 | Z5333     | corA  | Magnesium transport protein corA                                       |
| G2583_4614             |         | Z5334     | -     | putative membrane protein                                              |
| G2583_4615             | ECs4747 | Z5335     | -     | hypothetical protein                                                   |
| G2583_4616             |         | Z5336     | corA  | hypothetical protein                                                   |
| G2583_4617             |         | Z5337     | -     | hypothetical protein                                                   |
| G2583_4618             | ECs4748 | Z5339     | -     | Hypothetical membrane protein                                          |
| G2583_4619             | ECs4749 | Z5340     | rarD  | hypothetical protein                                                   |
| G2583_4620             | ECs4750 | Z5341     | yigI  | Thioesterase family protein                                            |
| G2583_4621             | ECs4751 | Z5342     | pldA  | Phospholipase A1 precursor                                             |
| G2583_4622             | ECs4752 | Z5343     | recQ  | ATP-dependent DNA helicase RecQ                                        |
| G2583_4623             | ECs4753 | Z5344     | rhtC  | Threonine efflux protein                                               |
| G2583_4624             | ECs4754 | Z5345     | rhtB  | Homoserine/homoserine lactone efflux protein                           |
| G2583_4625             | ECs4755 | Z5346     | pldB  | Lysophospholipase L2                                                   |
| G2583_4626             | ECs4756 | Z5347     | yigL  | Putative hydrolase                                                     |
| G2583_4627             | ECs4757 | Z5348     | yigM  | Uncharacterized membrane protein yigM                                  |
| G2583_4628             | ECs4758 | Z5349     | metR  | regulator for metE and metH                                            |
| G2583_4629             | ECs4759 | Z5351     | metE  | 5-methyltetrahydropteroyltriglutamate-homocysteine S-methyltransferase |
| G2583_4630             | ECs4760 | Z5352     | ysgA  | Putative enzyme                                                        |
| G2583_4631             | ECs4761 | Z5353     | udp   | Uridine phosphorylase                                                  |
| G2583_4632             | ECs4762 | Z5354     | rmuC  | DNA recombination protein rmuC                                         |
| G2583_4633             | ECs4763 | Z5355     | ubiE  | Ubiquinone/menaquinone biosynthesis methyltransferase ubiE             |
| G2583_4634             | ECs4764 | Z5356     | yigP  | hypothetical protein                                                   |
| G2583_4635             | ECs4765 | Z5357     | ubiB  | Probable ubiquinone biosynthesis protein ubiB                          |

Table S10. The orthologue table of the O55 and O157 strains Page 150

| Locus_tag <sup>a</sup> |         |        | Gene | Product                                                                                                                                   |
|------------------------|---------|--------|------|-------------------------------------------------------------------------------------------------------------------------------------------|
| CB9615                 | Sakai   | EDL933 |      |                                                                                                                                           |
| G2583_4636             | ECs4766 | Z5358  | tatA | Sec-independent twin-arginine translocase subunit TatA                                                                                    |
| G2583_4637             | ECs4767 | Z5359  | tatB | sec-independent translocase                                                                                                               |
| G2583_4638             | ECs4768 | Z5360  | tatC | TatABCE protein translocation system subunit                                                                                              |
| G2583_4639             | ECs4769 | Z5361  | tatD | MttC                                                                                                                                      |
| G2583_4640             | ECs4770 | Z5362  | rfaH | transcriptional activator RfaH                                                                                                            |
| G2583_4641             | ECs4771 | Z5364  | ubiD | 3-octaprenyl-4-hydroxybenzoate carboxy-lyase                                                                                              |
| G2583_4642             | ECs4772 | Z5365  | fre  | Oxidoreductase                                                                                                                            |
| G2583_4643             | ECs4773 | Z5366  | fadA | Beta-ketoadipyl CoA thiolase                                                                                                              |
| G2583_4644             | ECs4774 | Z5367  | fadB | Fused 3-hydroxybutyryl-CoA epimerase/delta(3)-cis-delta(2)-trans- enoyl-CoA isomerase/enoyl-CoA hydratase/3-hydroxyacyl-CoA dehydrogenase |
| G2583_4645             | ECs4775 | Z5369  | pepQ | Xaa-Pro dipeptidase                                                                                                                       |
| G2583_4646             | ECs4776 | Z5370  | yigZ | hypothetical protein                                                                                                                      |
| G2583_4647             | ECs4777 | Z5371  | trkH | Trk system potassium uptake protein trkH                                                                                                  |
| G2583_4648             | ECs4778 | Z5372  | hemG | Protoporphyrinogen oxidase                                                                                                                |
| G2583_4649             | rrsA    | RNA105 | rrs  | 16S ribosomal RNA                                                                                                                         |
| G2583_4650             | ileT    | RNA106 | ileT | Ile tRNA                                                                                                                                  |
| G2583_4651             | alaT    | RNA107 | alaT | Ala tRNA                                                                                                                                  |
| G2583_4652             | rrlA    | RNA108 | rrl  | 23S ribosomal RNA                                                                                                                         |
| G2583_4653             | rrfA    | RNA109 | rrf  | 5S ribosomal RNA                                                                                                                          |
| G2583_4654             | ECs4779 | Z5388  | mobB | Molybdopterin-guanine dinucleotide biosynthesis protein                                                                                   |
| G2583_4655             | ECs4780 | Z5389  | mobA | Molybdopterin-guanine dinucleotide biosynthesis protein                                                                                   |
| G2583_4656             | ECs4781 | Z5390  | yihD | hypothetical protein                                                                                                                      |
| G2583_4657             | ECs4782 | Z5391  | rdoA | predicted kinase                                                                                                                          |
| G2583_4658             | ECs4783 | Z5392  | dsbA | Thiol:disulfide interchange protein dsbA precursor                                                                                        |
| G2583_4659             | ECs4784 | Z5393  | yihF | Putative GTP-binding protein                                                                                                              |
| G2583_4660             | ECs4785 | Z5394  | yihG | Acyltransferase domain protein                                                                                                            |
| G2583_4661             |         |        | -    | hypothetical protein                                                                                                                      |
| G2583_4662             | ECs4786 | Z5398  | polA | DNA polymerase I                                                                                                                          |
| G2583_4663             | spf     | RNA110 | spf  | ncRNA                                                                                                                                     |
| G2583_4664             | ECs4787 | Z5400  | yihA | Probable GTP-binding protein engB                                                                                                         |
| G2583_4665             |         | Z5401  | -    | ncRNA                                                                                                                                     |
| G2583_4666             | ECs4788 | Z5402  | yihI | UPF0241 protein yihI                                                                                                                      |
| G2583_4667             | ECs4789 | Z5403  | hemN | Oxygen-independent coproporphyrinogen III oxidase                                                                                         |
| G2583_4668             | ECs4790 | Z5404  | glnG | Nitrogen regulation protein NR                                                                                                            |
| G2583_4669             | ECs4791 | Z5405  | glnL | Signal transduction histidine kinase, nitrogen specific                                                                                   |
| G2583_4670             | ECs4792 | Z5406  | glnA | Glutamine synthetase                                                                                                                      |
| G2583_4671             | ECs4793 | Z5407  | typA | GTP-binding protein typA/bipA                                                                                                             |
| G2583_4672             | ECs4794 | Z5408  | yihL | putative transcriptional regulator                                                                                                        |
| G2583_4673             | ECs4795 | Z5409  | yihM | AP endonuclease, family 2                                                                                                                 |
| G2583_4674             | ECs4796 | Z5410  | yihN | Transporter, major facilitator family                                                                                                     |
| G2583_4675             | ECs4797 | Z5411  | ompL | hypothetical protein                                                                                                                      |
| G2583_4676             | ECs4798 | Z5412  | yihO | Sugar (Glycoside-Pentoside-Hexuronide) transporter family protein                                                                         |

Table S10. The orthologue table of the O55 and O157 strains Page 151

| Locus_tag <sup>a</sup> |         |        | Gene | Product                                                     |
|------------------------|---------|--------|------|-------------------------------------------------------------|
| CB9615                 | Sakai   | EDL933 |      |                                                             |
| G2583_4677             | ECs4799 | Z5413  | yihP | Sugar transporter family protein                            |
| G2583_4678             | ECs4800 | Z5414  | yihQ | Glycosyl hydrolase, family 31                               |
| G2583_4679             | ECs4801 | Z5415  | -    | hypothetical protein                                        |
| G2583_4680             | ECs4802 | Z5416  | yihR | Aldose-1-epimerase family protein                           |
| G2583_4681             | ECs4803 | Z5417  | yihS | N-acylglucosamine 2-epimerase                               |
| G2583_4682             | ECs4804 | Z5418  | yihT | Uncharacterized aldolase yihT                               |
| G2583_4683             | ECs4805 | Z5420  | yihU | 3-hydroxyisobutyrate dehydrogenase family                   |
| G2583_4684             | ECs4806 | Z5421  | yihV | Kinase, PfkB family                                         |
| G2583_4685             | ECs4807 | Z5422  | yihW | Putative DEOR-type transcriptional activator                |
| G2583_4686             | ECs4808 | Z5424  | yihX | Phosphatase YihX                                            |
| G2583_4687             | ECs4809 | Z5425  | yihY | tRNA-processing ribonuclease BN                             |
| G2583_4688             | ECs4810 | Z5426  | dtd  | D-tyrosyl-tRNA(Tyr) deacylase                               |
| G2583_4689             | ECs4811 | Z5427  | yiiD | putative acetyltransferase                                  |
| G2583_4690             | ECs4812 | Z5428  | -    | hypothetical protein                                        |
| G2583_4690             | ECs4813 | Z5429  | -    | hypothetical protein                                        |
| G2583_4691             | ECs4814 |        | -    | hypothetical protein                                        |
| G2583_4692             |         | Z5430  | -    | hypothetical protein                                        |
| G2583_4693             | ECs4815 | Z5431  | yiiE | Ribbon-helix-helix protein, copG family                     |
| G2583_4694             | ECs4816 | Z5432  | yiiF | hypothetical protein                                        |
| G2583_4695             | ECs4817 | Z5433  | fdhE | protein AraJ                                                |
| G2583_4696             | ECs4818 | Z5434  | fdol | Formate dehydrogenase, cytochrome b556(fdo) subunit         |
| G2583_4697             | ECs4819 | Z5435  | fdoH | Formate dehydrogenase-O, iron-sulfur subunit                |
| G2583_4698             | ECs4820 | Z5436  | fdoG | formate dehydrogenase-O major subunit                       |
| G2583_4699             | ECs4821 | Z5438  | fdhD | ApaG                                                        |
| G2583_4700             | ECs4822 | Z5439  | yiiG | hypothetical protein                                        |
| G2583_4701             | ECs4823 | Z5440  | frvR | Putative PTS system, IIA component                          |
| G2583_4702             | ECs4824 | Z5441  | frvX | Aminopeptidase                                              |
| G2583_4703             | ECs4825 | Z5442  | frvB | Phosphotransferase system, fructose-specific I IC component |
| G2583_4704             | ECs4826 | Z5443  | frvA | PTS system, fructose family, IIA component                  |
| G2583_4705             | ECs4827 | Z5444  | rafY | Glycoporin RafY                                             |
| G2583_4706             | ECs4828 | Z5445  | rhaM | L-rhamnose 1-epimerase                                      |
| G2583_4707             | ECs4829 | Z5446  | rhaD | Rhamnulose-1-phosphate aldolase                             |
| G2583_4708             | ECs4830 | Z5447  | rhaA | L-rhamnose isomerase                                        |
| G2583_4709             | ECs4831 | Z5448  | rhaB | Rhamnulokinase                                              |
| G2583_4710             | ECs4832 | Z5449  | rhaS | positive regulator for rhaBAD operon                        |
| G2583_4711             | ECs4833 | Z5450  | rhaR | positive regulator for rhaRS operon                         |
| G2583_4712             | ECsp022 | Z5452  | rhaT | rhamnose transport                                          |
| G2583_4712             |         |        | rhaT | rhamnose transport                                          |
| G2583_4713             | ECs4834 | Z5453  | sodA | Superoxide dismutase                                        |
| G2583_4714             | ECs4835 | Z5454  | kdgT | 2-keto-3-deoxygluconate permease                            |
| G2583_4715             | ECs4836 | Z5455  | yiiM | MOSC domain protein                                         |
| G2583_4716             | ECs4837 | Z5456  | cpxA | two-component sensor protein                                |

Table S10. The orthologue table of the O55 and O157 strains Page 152

| Locus_tag <sup>a</sup> |         |        | Gene | Product                                                                                          |
|------------------------|---------|--------|------|--------------------------------------------------------------------------------------------------|
| CB9615                 | Sakai   | EDL933 |      |                                                                                                  |
| G2583_4717             | ECs4838 | Z5457  | cpxR | DNA-binding response regulator in two-component regulatory system with CpxA                      |
| G2583_4718             | ECs4839 | Z5458  | cpxP | P pilus assembly/Cpx signaling pathway, periplasmic inhibitor/zinc-resistance associated protein |
| G2583_4719             | ECs4840 | Z5459  | fieF | Ferrous-iron efflux pump fieF                                                                    |
| G2583_4720             | ECs4841 | Z5460  | pfkA | 6-phosphofructokinase isozyme 1                                                                  |
| G2583_4721             |         |        | -    | hypothetical protein                                                                             |
| G2583_4722             | ECs4842 | Z5462  | sbp  | Sulfate-binding protein                                                                          |
| G2583_4723             | ECs4843 | Z5463  | cdh  | CDP-diacylglycerol pyrophosphatase                                                               |
| G2583_4724             | ECs4844 | Z5464  | tpiA | Triosephosphate isomerase                                                                        |
| G2583_4725             | ECs4845 | Z5465  | yiiQ | hypothetical protein                                                                             |
| G2583_4726             | ECs4846 | Z5466  | yiiR | hypothetical protein                                                                             |
| G2583_4727             | ECs4847 | Z5467  | yiiS | hypothetical protein                                                                             |
| G2583_4728             | ECs4848 | Z5468  | uspD | Universal stress protein D                                                                       |
| G2583_4729             | ECs4849 | Z5469  | fpr  | Ferredoxin--NADP(+) reductase                                                                    |
| G2583_4730             | ECs4850 | Z5470  | glpX | Fructose-1,6-bisphosphatase, class II                                                            |
| G2583_4731             | ECs4851 | Z5471  | glpK | Glycerol kinase                                                                                  |
| G2583_4732             | ECs4852 | Z5472  | glpF | glycerol uptake facilitator protein                                                              |
| G2583_4733             | ECs4853 | Z5473  | yiiU | Cell division protein zapB                                                                       |
| G2583_4734             | ECs4854 | Z5474  | -    | hypothetical protein                                                                             |
| G2583_4735             | ECs4855 | Z5475  | -    | hypothetical protein                                                                             |
| G2583_4736             | ECs4856 | Z5476  | rraA | Regulator of ribonuclease activity A                                                             |
| G2583_4737             | ECs4857 | Z5477  | menA | 1,4-dihydroxy-2-naphthoate octaprenyltransferase                                                 |
| G2583_4738             | ECs4858 | Z5478  | hslU | ATP-dependent hsl protease ATP-binding subunit hslU                                              |
| G2583_4739             | ECs4859 | Z5479  | hslV | ATP-dependent protease hslV                                                                      |
| G2583_4740             | ECs4860 | Z5480  | ftsN | Cell division protein FtsN                                                                       |
| G2583_4741             | ECs4861 | Z5481  | cytR | Transcriptional regulators                                                                       |
| G2583_4742             | ECs4862 | Z5482  | priA | Primosomal protein N'                                                                            |
| G2583_4743             | ECs4863 | Z5484  | rpmE | 50S ribosomal protein L31                                                                        |
| G2583_4744             | ECs4864 | Z5485  | rhsF | RhsH core protein with extension                                                                 |
| G2583_4744             | ECs4864 | Z5487  | rhsF | RhsH core protein with extension                                                                 |
| G2583_4744             | ECs4864 | Z5488  | rhsF | RhsH core protein with extension                                                                 |
| G2583_4745             |         | Z5489  | -    | hypothetical protein                                                                             |
| G2583_4746             |         | Z5490  | insB | hypothetical protein                                                                             |
| G2583_4747             |         | Z5491  | -    | IS1N transposase                                                                                 |
| G2583_4748             | ECs4865 |        | -    | hypothetical protein                                                                             |
| G2583_4749             | ECs4866 | Z5492  | yiiX | hypothetical protein                                                                             |
| G2583_4750             | ECs4867 | Z5493  | metJ | MetJ                                                                                             |
| G2583_4751             | ECs4868 | Z5494  | metB | O-succinylhomoserine (Thiol)-lyase                                                               |
| G2583_4752             | ECs4869 | Z5495  | metL | Aspartokinase/homoserine dehydrogenase II                                                        |
| G2583_4753             | ECs4870 | Z5496  | metF | 5,10-methylenetetrahydrofolate reductase                                                         |
| G2583_4754             | ECs4871 | Z5497  | katG | Peroxidase/catalase HPI                                                                          |
| G2583_4755             | ECs4872 | Z5498  | yijE | Hypothetical transport protein yijE                                                              |
| G2583_4756             | ECs4873 | Z5499  | yijF | hypothetical protein                                                                             |



Table S10. The orthologue table of the O55 and O157 strains Page 153

| Locus_tag <sup>a</sup> |         |        | Gene | Product                                         |
|------------------------|---------|--------|------|-------------------------------------------------|
| CB9615                 | Sakai   | EDL933 |      |                                                 |
| G2583_4757             | ECs4874 | Z5500  | gldA | Glycerol dehydrogenase,                         |
| G2583_4758             | ECs4875 | Z5501  | fsaB | Fructose-6-phosphate aldolase 2                 |
| G2583_4759             | ECs4877 | Z5502  | ptsA | PEP-protein phosphotransferase system enzyme I  |
| G2583_4760             | ECs4876 | Z5503  | yijI | hypothetical protein                            |
| G2583_4761             | ECs4878 | Z5504  | frwC | PTS system, fructose-like-2 IIC component       |
| G2583_4761             | ECsp023 | Z5505  | frwC | PTS system, fructose-like-2 IIC component       |
| G2583_4762             | ECs4879 | Z5506  | frwB | PTS system fructose-like IIB component 1        |
| G2583_4763             | ECs4880 | Z5507  | pfID | Formate C-acetyltransferase 2                   |
| G2583_4764             | ECs4881 | Z5508  | pfIC | Glycyl-radical enzyme activating protein family |
| G2583_4765             | ECs4882 | Z5509  | frwD | Predicted enzyme IIB component of PTS           |
| G2583_4766             | ECs4883 | Z5512  | yijO | putative ARAC-type regulatory protein           |
| G2583_4767             | ECs4884 | Z5513  | yijP | Membrane protein                                |
| G2583_4768             | ECs4885 | Z5514  | ppc  | Phosphoenolpyruvate carboxylase                 |
| G2583_4769             | ECs4886 | Z5515  | argE | Acetylornithine deacetylase                     |
| G2583_4770             | ECs4887 | Z5516  | argC | N-acetyl-gamma-glutamyl-phosphate reductase     |
| G2583_4771             | ECs4888 | Z5517  | argB | Acetylglutamate kinase                          |
| G2583_4772             | ECs4889 | Z5518  | argH | Argininosuccinate lyase                         |
| G2583_4773             | oxyS    |        | oxyS | ncRNA                                           |
| G2583_4774             | ECs4890 | Z5519  | oxyR | Transcriptional regulator                       |
| G2583_4775             | ECs4891 | Z5521  | sthA | Soluble pyridine nucleotide transhydrogenase    |
| G2583_4776             | ECs4892 | Z5522  | -    | Hippuricase                                     |
| G2583_4777             | ECs4893 | Z5523  | -    | Major facilitator superfamily                   |
| G2583_4778             | ECs4894 | Z5524  | fabR | Transcriptional regulator                       |
| G2583_4779             | ECs4895 | Z5525  | yijD | Inner membrane protein yijD                     |
| G2583_4780             | ECs4896 | Z5526  | trmA | tRNA (uracil-5-)-methyltransferase              |
| G2583_4781             | ECs4897 | Z5527  | btuB | Vitamin B12 transporter btuB precursor          |
| G2583_4782             | ECs4898 | Z5528  | murl | Glutamate racemase                              |
| G2583_4783             | rrsB    | RNA111 | rrs  | 16S ribosomal RNA                               |
| G2583_4784             | gltT    | RNA112 | gltT | Glu tRNA                                        |
| G2583_4785             | rrlB    | RNA113 | rrl  | 23S ribosomal RNA                               |
| G2583_4786             | rrfB    | RNA114 | rrf  | 5S ribosomal RNA                                |
| G2583_4787             | ECs4899 | Z5543  | murB | UDP-N-acetylenolpyruvoylglucosamine reductase   |
| G2583_4788             | ECs4900 | Z5544  | birA | Bifunctional protein BirA                       |
| G2583_4789             | ECs4901 | Z5545  | coaA | Pantothenate kinase                             |
| G2583_4790             | ECs4902 | Z5547  | -    | hypothetical protein                            |
| G2583_4791             | thrU    | RNA115 | thrU | Thr tRNA                                        |
| G2583_4792             | tyrU    | RNA116 | tyrU | Tyr tRNA                                        |
| G2583_4793             | glyT    | RNA117 | glyT | Gly tRNA                                        |
| G2583_4794             | thrT    | RNA118 | thrT | Thr tRNA                                        |
| G2583_4795             | ECs4903 | Z5553  | tufB | Elongation factor Tu 2                          |
| G2583_4796             | ECs4904 | Z5554  | secE | Preprotein translocase                          |
| G2583_4797             | ECs4905 | Z5555  | nusG | Transcription antitermination protein nusG      |
| G2583_4798             | ECs4906 | Z5556  | rplK | 50S ribosomal protein L11                       |
| G2583_4799             | ECs4907 | Z5557  | rplA | 50S ribosomal protein L1                        |

Table S10. The orthologue table of the O55 and O157 strains Page 154

| Locus_tag <sup>a</sup> |         |        | Gene | Product                                                                              |
|------------------------|---------|--------|------|--------------------------------------------------------------------------------------|
| CB9615                 | Sakai   | EDL933 |      |                                                                                      |
| G2583_4800             | ECs4908 | Z5558  | rplJ | 50S ribosomal protein L10                                                            |
| G2583_4801             | ECs4909 | Z5559  | rplL | 50S ribosomal protein L7/L12                                                         |
| G2583_4802             |         |        | -    | ncRNA                                                                                |
| G2583_4803             | ECs4910 | Z5560  | rpoB | DNA-directed RNA polymerase subunit beta                                             |
| G2583_4804             | ECs4911 | Z5561  | rpoC | DNA-directed RNA polymerase subunit beta'                                            |
| G2583_4805             | ECs4912 | Z5563  | yjaZ | Heat shock protein C                                                                 |
| G2583_4806             |         |        | -    | ncRNA                                                                                |
| G2583_4807             | ECs4913 | Z5564  | thiH | Thiazole biosynthesis protein ThiH                                                   |
| G2583_4808             | ECs4914 | Z5565  | thiG | Thiamin biosynthesis, thiazole moiety                                                |
| G2583_4809             |         | Z5566  | thiS | Thiamine biosynthesis protein ThiS                                                   |
| G2583_4810             | ECs4915 | Z5567  | thiF | Thiazole biosynthesis adenylyltransferase ThiF                                       |
| G2583_4811             | ECs4916 | Z5568  | thiE | Thiamine-phosphate pyrophosphorylase                                                 |
| G2583_4812             | ECs4917 | Z5569  | thiC | Thiamine biosynthesis protein thiC                                                   |
| G2583_4813             | ECs4918 | Z5570  | rsd  | Regulator of sigma D                                                                 |
| G2583_4814             | ECs4919 | Z5571  | nudC | NADH pyrophosphatase                                                                 |
| G2583_4815             | ECs4920 | Z5572  | hemE | Uroporphyrinogen decarboxylase                                                       |
| G2583_4816             | ECs4921 | Z5574  | nfi  | Endonuclease V                                                                       |
| G2583_4817             | ECs4922 | Z5575  | yjaG | hypothetical protein                                                                 |
| G2583_4818             | ECs4923 | Z5576  | hupA | DNA-binding protein HU-alpha                                                         |
| G2583_4819             | ECs4924 | Z5577  | yjaH | hypothetical protein                                                                 |
| G2583_4820             | ECs4925 | Z5578  | zraP | Zinc resistance-associated protein                                                   |
| G2583_4821             | ECs4926 | Z5579  | zraS | sensor protein ZraS                                                                  |
| G2583_4822             | ECs4927 | Z5580  | zraR | transcriptional regulatory protein ZraR                                              |
| G2583_4823             | ECs4928 | Z5582  | purD | Phosphoribosylamine--glycine ligase                                                  |
| G2583_4824             | ECs4929 | Z5583  | purH | IMP cyclohydrolase /<br>phosphoribosylaminoimidazolecarboxamide<br>formyltransferase |
| G2583_4825             | rrsE    | RNA119 | rrs  | 16S ribosomal RNA                                                                    |
| G2583_4826             | gltV    | RNA120 | gltV | Glu tRNA                                                                             |
| G2583_4827             | rrlE    | RNA121 | rrl  | 23S ribosomal RNA                                                                    |
| G2583_4828             | rrfE    | RNA122 | rrf  | 5S ribosomal RNA                                                                     |
| G2583_4829             | ECs4930 | Z5598  | yjaB | hypothetical protein                                                                 |
| G2583_4830             | ECs4931 | Z5599  | metA | Homoserine O-succinyltransferase                                                     |
| G2583_4831             | ECs4932 | Z5600  | aceB | Malate synthase A                                                                    |
| G2583_4832             | ECs4933 | Z5601  | aceA | Isocitrate lyase                                                                     |
| G2583_4833             | ECs4934 | Z5602  | aceK | Isocitrate dehydrogenase kinase/phosphatase                                          |
| G2583_4834             | ECs4935 | Z5608  | arp  | ShET2 enterotoxin, N- region family                                                  |
| G2583_4835             | ECs4936 | Z5609  | iclR | Repressor of aceBA operon                                                            |
| G2583_4836             | ECs4937 | Z5610  | metH | Methionine synthase                                                                  |
| G2583_4837             | ECs4938 | Z5611  | yjbB | hypothetical protein                                                                 |
| G2583_4838             | ECs4939 | Z5612  | pepE | Peptidase E                                                                          |
| G2583_4839             | ECs4940 |        | -    | hypothetical protein                                                                 |
| G2583_4840             | ECs4941 | Z5613  | sorE | Putative L-sorbose-1-P-reductase                                                     |

Table S10. The orthologue table of the O55 and O157 strains Page 155

| Locus_tag <sup>a</sup> |         |           | Gene | Product                                                    |
|------------------------|---------|-----------|------|------------------------------------------------------------|
| CB9615                 | Sakai   | EDL933    |      |                                                            |
| G2583_4841             | ECs4942 | Z5614     | sorM | PTS system, mannose/fructose/sorbose family, IID component |
| Indel-193              | ECs4943 | Indel-193 | -    | putative regulatory protein                                |
| Indel-193              | ECs4944 | Indel-193 | -    | putative DNA-binding protein                               |
| Indel-193              | ECs4945 | Indel-193 | -    | phage transposase                                          |
| Indel-193              | ECs4946 | Indel-193 | -    | putative DNA transposition protein                         |
| Indel-193              | ECs4947 | Indel-193 | -    | hypothetical protein                                       |
| Indel-193              | ECs4948 | Indel-193 | -    | hypothetical protein                                       |
| Indel-193              | ECs4949 | Indel-193 | -    | hypothetical protein                                       |
| Indel-193              | ECs4950 | Indel-193 | -    | hypothetical protein                                       |
| Indel-193              | ECs4951 | Indel-193 | -    | hypothetical protein                                       |
| Indel-193              | ECs4952 | Indel-193 | -    | putative host-nuclease inhibitor protein                   |
| Indel-193              | ECs4953 | Indel-193 | -    | hypothetical protein                                       |
| Indel-193              | ECs4954 | Indel-193 | -    | hypothetical protein                                       |
| Indel-193              | ECs4955 | Indel-193 | -    | hypothetical protein                                       |
| Indel-193              | ECs4956 | Indel-193 | -    | hypothetical protein                                       |
| Indel-193              | ECs4957 | Indel-193 | -    | hypothetical protein                                       |
| Indel-193              | ECs4958 | Indel-193 | -    | hypothetical protein                                       |
| Indel-193              | ECs4959 | Indel-193 | -    | hypothetical protein                                       |
| Indel-193              | ECs4960 | Indel-193 | -    | hypothetical protein                                       |
| Indel-193              | ECs4961 | Indel-193 | -    | putative transcription regulator                           |
| Indel-193              | ECs4962 | Indel-193 | -    | putative endolysin                                         |
| Indel-193              | ECs4963 | Indel-193 | -    | hypothetical protein                                       |
| Indel-193              | ECs4964 | Indel-193 | -    | hypothetical protein                                       |
| Indel-193              | ECs4965 | Indel-193 | -    | C4-type zinc finger protein (TraR family)                  |
| Indel-193              | ECs4966 | Indel-193 | -    | hypothetical protein                                       |
| Indel-193              | ECs4967 | Indel-193 | -    | hypothetical protein                                       |
| Indel-193              | ECs4968 | Indel-193 | -    | hypothetical protein                                       |
| Indel-193              | ECs4969 | Indel-193 | -    | putative portal protein                                    |
| Indel-193              | ECs4970 | Indel-193 | -    | hypothetical protein                                       |
| Indel-193              | ECs4971 | Indel-193 | -    | hypothetical protein                                       |
| Indel-193              | ECs4972 | Indel-193 | -    | putative virion morphogenesis protein                      |
| Indel-193              | ECs4973 | Indel-193 | -    | putative protease protein                                  |
| Indel-193              | ECs4974 | Indel-193 | -    | putative major head subunit                                |
| Indel-193              | ECs4975 | Indel-193 | -    | hypothetical protein                                       |
| Indel-193              | ECs4976 | Indel-193 | -    | hypothetical protein                                       |
| Indel-193              | ECs4977 | Indel-193 | -    | hypothetical protein                                       |
| Indel-193              | ECs4978 | Indel-193 | -    | hypothetical protein                                       |
| Indel-193              | ECs4979 | Indel-193 | -    | putative tail sheath protein                               |
| Indel-193              | ECs4980 | Indel-193 | -    | hypothetical protein                                       |
| Indel-193              | ECs4981 | Indel-193 | -    | hypothetical protein                                       |
| Indel-193              | ECs4982 | Indel-193 | -    | putative tape measure protein                              |
| Indel-193              | ECs4983 | Indel-193 | -    | putative DNA circulation protein                           |
| Indel-193              | ECs4984 | Indel-193 | -    | putative tail protein                                      |

Table S10. The orthologue table of the O55 and O157 strains Page 156

| Locus_tag <sup>a</sup> |         |           | Gene | Product                                                                    |
|------------------------|---------|-----------|------|----------------------------------------------------------------------------|
| CB9615                 | Sakai   | EDL933    |      |                                                                            |
| Indel-193              | ECs4985 | Indel-193 | -    | hypothetical protein                                                       |
| Indel-193              | ECs4986 | Indel-193 | -    | hypothetical protein                                                       |
| Indel-193              | ECs4987 | Indel-193 | -    | hypothetical protein                                                       |
| Indel-193              | ECs4988 | Indel-193 | -    | hypothetical protein                                                       |
| Indel-193              | ECs4989 | Indel-193 | -    | tail fiber                                                                 |
| Indel-193              | ECs4990 | Indel-193 | -    | putative tail fiber assembly protein                                       |
| Indel-193              | ECs4991 | Indel-193 | -    | putative tail fiber protein                                                |
| Indel-193              | ECs4992 | Indel-193 | -    | putative DNA-invertase                                                     |
| Indel-193              | ECs4993 | Indel-193 | -    | hypothetical protein                                                       |
| Indel-193              | ECs4994 | Indel-193 | -    | hypothetical protein                                                       |
| Indel-193              | ECs4995 | Indel-193 | -    | hypothetical protein                                                       |
| Indel-193              | ECs4996 | Indel-193 | -    | hypothetical protein                                                       |
| Indel-193              | ECs4997 | Indel-193 | -    | translational regulator                                                    |
| Indel-193              | ECs4998 | Indel-193 | -    | putative DNA modification protein                                          |
| G2583_4841             | ECs4999 | Z5614     | sorM | PTS system, mannose/fructose/sorbose family, IID component                 |
| G2583_4842             | ECs5000 | Z5615     | sorA | PTS system, mannose/fructose/sorbose family, IIC component                 |
| G2583_4843             | ECs5001 | Z5616     | sorB | Putative sorbose PTS component                                             |
| G2583_4844             | ECs5002 | Z5617     | sorF | PTS system, mannose/fructose/sorbose family, IIA component                 |
| G2583_4845             | ECs5003 | Z5618     | sorD | Sorbitol-6-phosphate 2-dehydrogenase                                       |
| G2583_4846             | ECs5004 | Z5619     | -    | Putative transcriptional regulator of sorbose uptake and utilization genes |
| G2583_4847             | ECs5005 | Z5620     | rluF | Ribosomal large subunit pseudouridine synthase F                           |
| G2583_4848             | ECs5006 | Z5621     | pagB | hypothetical protein                                                       |
| G2583_4849             | ECs5007 | Z5622     | lysC | Lysine-sensitive aspartokinase 3                                           |
| G2583_4850             | ECs5008 | Z5623     | pgi  | Glucose-6-phosphate isomerase                                              |
| G2583_4851             | ECs5009 | Z5624     | yjbE | hypothetical protein                                                       |
| G2583_4852             | ECs5010 | Z5625     | yjbF | hypothetical protein                                                       |
| G2583_4853             | ECs5011 | Z5626     | yjbG | hypothetical protein                                                       |
| G2583_4854             | ECs5012 | Z5627     | yjbH | hypothetical protein                                                       |
| G2583_4855             | ECs5013 | Z5628     | psiE | phosphate-starvation-inducible protein PsiE                                |
| G2583_4856             | ECs5014 | Z5629     | xylE | D-xylose-proton symporter                                                  |
| G2583_4857             | ECs5015 | Z5630     | malG | Part of maltose permease, inner membrane                                   |
| G2583_4858             | ECs5016 | Z5631     | malF | Maltose transport system permease protein malF                             |
| G2583_4859             | ECs5017 | Z5632     | malE | Maltose-binding periplasmic protein precursor                              |
| G2583_4860             | ECs5018 | Z5633     | malK | Maltose/maltodextrin import ATP-binding protein malK                       |
| G2583_4861             | ECs5019 | Z5634     | lamB | Maltoporin precursor                                                       |
| G2583_4862             | ECs5020 | Z5635     | malM | Maltose operon periplasmic protein precursor                               |
| G2583_4863             | ECs5021 | Z5636     | yjbl | hypothetical protein                                                       |
| G2583_4864             | ECs5022 | Z5638     | ubiC | Chorismate--pyruvate lyase                                                 |
| G2583_4865             | ECs5023 | Z5639     | ubiA | 4-hydroxybenzoate octaprenyltransferase                                    |
| G2583_4866             | ECs5024 | Z5640     | plsB | Glycerol-3-phosphate acyltransferase                                       |

Table S10. The orthologue table of the O55 and O157 strains Page 157

| Locus_tag <sup>a</sup> |         |        | Gene | Product                                                            |
|------------------------|---------|--------|------|--------------------------------------------------------------------|
| CB9615                 | Sakai   | EDL933 |      |                                                                    |
| G2583_4867             | ECs5025 | Z5641  | dgkA | Diacylglycerol kinase                                              |
| G2583_4868             | ECs5026 | Z5642  | lexA | LexA repressor                                                     |
| G2583_4869             | ECs5027 | Z5643  | dinF | MATE efflux family protein                                         |
| G2583_4870             | ECs5028 | Z5644  | yjbJ | UPF0337 protein yjbJ                                               |
| G2583_4871             | ECs5029 | Z5645  | zur  | Putative zinc uptake regulation protein                            |
| G2583_4872             | ECs5030 | Z5646  | yjbM | hypothetical protein                                               |
| G2583_4873             | ECs5031 | Z5647  | dusA | tRNA-dihydrouridine synthase A                                     |
| G2583_4874             | ECs5032 | Z5648  | pspG | hypothetical protein                                               |
| G2583_4875             | ECs5033 | Z5649  | qor  | Quinone oxidoreductase                                             |
| G2583_4876             | ECs5034 | Z5650  | dnaB | Replicative DNA helicase                                           |
| G2583_4877             | ECs5035 | Z5651  | alr  | Alanine racemase, biosynthetic                                     |
| G2583_4878             | ECs5036 | Z5652  | tyrB | Aromatic-amino-acid transaminase                                   |
| G2583_4879             |         |        | -    | hypothetical protein                                               |
| G2583_4880             | ECs5037 | Z5654  | aphA | Diadenosine tetraphosphatase                                       |
| G2583_4881             | ECs5038 | Z5655  | yjbQ | UPF0047 protein yjbQ                                               |
| G2583_4882             | ECs5039 | Z5656  | yjbR | hypothetical protein                                               |
| G2583_4883             | ECs5040 | Z5657  | uvrA | UvrABC system protein A                                            |
| G2583_4884             | ECs5041 | Z5658  | ssb  | Single-stranded DNA-binding protein                                |
| G2583_4885             | ECs5042 | Z5659  | yjCB | hypothetical protein                                               |
| G2583_4886             | ECs5043 | Z5660  | yjCC | Cyclic diguanylate phosphodiesterase (EAL) domain protein          |
| G2583_4887             | ECs5044 | Z5661  | soxS | DNA-binding transcriptional dual regulator                         |
| G2583_4888             | ECs5045 | Z5662  | soxR | Redox-sensitive transcriptional activator soxR                     |
| G2583_4889             | ECs5046 | Z5663  | yjCD | Inorganic anion transporter, sulfate permease (SulP) family        |
| G2583_4890             | ECs5047 | Z5664  | yjCE | Na <sup>+</sup> /H <sup>+</sup> antiporter                         |
| G2583_4891             | ECs5048 | Z5665  | yjCF | hypothetical protein                                               |
| G2583_4892             | ECs5049 | Z5666  | actP | Cation/acetate symporter actP                                      |
| G2583_4893             | ECs5050 | Z5667  | yjCH | hypothetical protein                                               |
| G2583_4894             | ECs5051 | Z5668  | acs  | Acetyl-coenzyme A synthetase                                       |
| G2583_4895             | ECs5052 | Z5669  | nrfA | Cytochrome c-552 precursor                                         |
| G2583_4896             | ECs5053 | Z5670  | nrfB | NrfB, formate-dependent nitrite reductase                          |
| G2583_4897             | ECs5054 | Z5671  | nrfC | formate-dependent nitrite reductase; Fe-S centers                  |
| G2583_4898             | ECs5055 | Z5672  | nrfD | NrfD protein                                                       |
| G2583_4899             | ECs5056 | Z5673  | nrfE | Cytochrome c-type biogenesis protein NrfE                          |
| G2583_4900             | ECs5057 | Z5674  | nrfF | Formate-dependent nitrite reductase complex subunit nrfF precursor |
| G2583_4901             | ECs5058 | Z5675  | nrfG | Formate-dependent nitrite reductase complex NrfG subunit           |
| G2583_4902             | ECs5059 | Z5676  | gltP | Sodium:dicarboxylate symporter                                     |
| G2583_4903             | ECs5060 | Z5677  | yjCO | hypothetical protein                                               |
| G2583_4904             | ECs5061 | Z5678  | fdhF | selenopolypeptide subunit of formate dehydrogenase H               |
| G2583_4905             | ECs5062 | Z5680  | mdtP | Multidrug resistance outer membrane protein mdtP precursor         |

Table S10. The orthologue table of the O55 and O157 strains Page 158

| Locus_tag <sup>a</sup> |         |        | Gene  | Product                                                                 |
|------------------------|---------|--------|-------|-------------------------------------------------------------------------|
| CB9615                 | Sakai   | EDL933 |       |                                                                         |
| G2583_4906             | ECs5063 | Z5681  | mdtO  | Multidrug resistance protein mdtO                                       |
| G2583_4907             | ECs5064 | Z5682  | mdtN  | multidrug resistance protein MdtN                                       |
| G2583_4908             | ECs5065 |        | yticA | hypothetical protein                                                    |
| G2583_4909             | ECs5066 | Z5683  | yjcS  | hypothetical protein                                                    |
| G2583_4910             | ECs5067 | Z5684  | -     | Putative transcriptional regulator                                      |
| G2583_4911             | ECs5068 | Z5686  | PfkB  | PfkB domain protein                                                     |
| G2583_4912             | ECs5069 | Z5687  | -     | Fructose-bisphosphate aldolase                                          |
| G2583_4913             | ECs5070 | Z5688  | -     | hypothetical protein                                                    |
| G2583_4914             | ECs5071 | Z5689  | -     | Putative periplasmic ribose-binding protein of ABC transport system     |
| G2583_4915             | ECs5072 | Z5690  | -     | Putative permease of ribose ABC transport system                        |
| G2583_4916             | ECs5073 | Z5691  | -     | Ribose import ATP-binding protein rbsA 2                                |
| G2583_4917             | ECs5074 | Z5692  | -     | Integral membrane sensor hybrid histidine kinase                        |
| G2583_4917             | ECs5074 | Z5693  | -     | Integral membrane sensor hybrid histidine kinase                        |
| G2583_4918             |         | Z5694  | yjdP  | hypothetical protein                                                    |
| G2583_4919             | ECs5075 | Z5695  | phnP  | Phosphonate utilization protein                                         |
| G2583_4920             | ECs5076 | Z5696  | phnO  | predicted acyltransferase with acyl-CoA N-acyltransferase domain        |
| G2583_4921             | ECs5077 | Z5697  | phnN  | Phosphonate metabolism protein/1,5-bisphosphokinase (PRPP-forming) PhnN |
| G2583_4922             | ECs5078 | Z5698  | phnM  | Phosphonate metabolism protein PhnM                                     |
| G2583_4923             | ECs5079 | Z5699  | phnL  | Phosphonate C-P lyase system protein PhnL                               |
| G2583_4924             | ECs5080 | Z5700  | phnK  | Phosphonate C-P lyase system protein PhnK                               |
| G2583_4925             | ECs5081 | Z5701  | phnJ  | PhnJ protein                                                            |
| G2583_4926             | ECs5082 | Z5702  | phnI  | Phosphonate metabolism protein PhnI                                     |
| G2583_4927             | ECs5083 | Z5703  | phnH  | Bacterial phosphonate metabolism protein PhnH                           |
| G2583_4928             | ECs5084 | Z5704  | phnG  | Phosphonate C-P lyase system protein PhnG                               |
| G2583_4929             | ECs5085 | Z5705  | phnF  | Phosphonates metabolism transcriptional regulator                       |
| G2583_4930             | ECs5086 | Z5706  | phnE  | Phosphonate ABC transporter, permease protein                           |
| G2583_4931             | ECs5087 | Z5707  | phnD  | Phosphonate ABC transporter, periplasmic phosphonate-binding protein    |
| G2583_4932             | ECs5088 | Z5708  | phnC  | Phosphonates import ATP-binding protein phnC                            |
| G2583_4933             | ECs5089 | Z5709  | yjdN  | Putative phnB protein                                                   |
| G2583_4934             | ECs5090 | Z5710  | yjdM  | Alkylphosphonate utilization operon protein PhnA                        |
| G2583_4935             | ECs5091 | Z5711  | yjdA  | hypothetical protein                                                    |
| G2583_4936             | ECs5092 | Z5712  | yjcZ  | hypothetical protein                                                    |
| G2583_4937             | ECs5093 | Z5713  | proP  | Proline/betaine transporter                                             |
| G2583_4938             | ECs5094 | Z5714  | basS  | Sensor histidine kinase BasS                                            |
| G2583_4939             | ECs5095 | Z5715  | basR  | DNA-binding response regulator BasR                                     |
| G2583_4940             | ECs5096 | Z5716  | eptA  | Putative sulfatase                                                      |
| G2583_4941             | ECs5097 | Z5717  | adiC  | Putative amino acid permease                                            |
| G2583_4942             | ECs5098 | Z5718  | adiY  | putative ARAC-type regulatory protein                                   |
| G2583_4943             | ECs5099 | Z5719  | adiA  | Biodegradative arginine decarboxylase                                   |
| G2583_4944             | ECs5100 | Z5720  | melR  | Melibiose operon regulatory protein                                     |

Table S10. The orthologue table of the O55 and O157 strains Page 159

| Locus_tag <sup>a</sup> |         |        | Gene | Product                                                                     |
|------------------------|---------|--------|------|-----------------------------------------------------------------------------|
| CB9615                 | Sakai   | EDL933 |      |                                                                             |
| G2583_4945             | ECs5101 | Z5721  | melA | Alpha-galactosidase                                                         |
| G2583_4946             | ECs5102 | Z5722  | melB | Melibiose carrier protein                                                   |
| G2583_4947             | ECs5103 | Z5723  | yjdF | hypothetical protein                                                        |
| G2583_4948             | ECs5104 | Z5724  | fumB | Fumarase B                                                                  |
| G2583_4949             | ECs5105 | Z5725  | dcuB | Anaerobic C4-dicarboxylate transporter DcuB                                 |
| G2583_4950             | ECs5106 | Z5726  | dcuR | DNA-binding response regulator in two-component regulatory system with DcuS |
| G2583_4951             | ECs5107 | Z5727  | dcuS | sensory histidine kinase DcuS                                               |
| G2583_4952             | ECs5108 | Z5728  | yjdI | hypothetical protein                                                        |
| G2583_4953             | ECs5109 | Z5729  | yjdJ | hypothetical protein                                                        |
| G2583_4954             | ECs5110 | Z5730  | yjdK | hypothetical protein                                                        |
| G2583_4955             |         | Z5731  | yjdO | hypothetical protein                                                        |
| G2583_4956             | ECs5111 | Z5732  | lysU | Lysyl-tRNA synthetase, heat inducible                                       |
| G2583_4957             | ECs5112 | Z5733  | yjdL | Amino acid/peptide transporter                                              |
| G2583_4958             | ECs5113 | Z5734  | cadA | Lysine decarboxylase, inducible                                             |
| G2583_4959             | ECs5114 | Z5735  | cadB | Probable cadaverine/lysine antiporter                                       |
| G2583_4960             | ECs5115 | Z5736  | cadC | Transcriptional activator cadC                                              |
| G2583_4961             | pheU    | RNA123 | pheU | Phe tRNA                                                                    |
| G2583_4962             | ECs5116 | Z5740  | yjdC | YjdC                                                                        |
| G2583_4963             | ECs5117 | Z5741  | dipZ | Thiol:disulfide interchange protein DsbD                                    |
| G2583_4964             | ECs5118 | Z5742  | cutA | Divalent-cation tolerance protein cutA                                      |
| G2583_4965             | ECs5119 | Z5743  | dcuA | Anaerobic C4-dicarboxylate transporter dcuA                                 |
| G2583_4966             | ECs5120 | Z5744  | aspA | aspartate ammonia-lyase                                                     |
| G2583_4967             | ECs5121 | Z5745  | fxsA | FxsA                                                                        |
| G2583_4968             | ECs5122 | Z5746  | yjeH | Amino acid-polyamine-organocation (APC) permease family protein             |
| G2583_4969             | ECs5123 | Z5747  | groS | hypothetical protein                                                        |
| G2583_4970             | ECs5124 | Z5748  | groL | 60 kDa chaperonin 1                                                         |
| G2583_4971             | ECs5125 | Z5749  | yjeI | hypothetical protein                                                        |
| G2583_4972             | ECs5126 | Z5750  | yjeJ | conserved hypothetical protein                                              |
| G2583_4973             | ECs5127 | Z5751  | yjeK | KamA family protein                                                         |
| G2583_4974             | ECs5128 | Z5752  | efp  | Elongation factor P                                                         |
| G2583_4975             |         | Z5753  | ecnA | Predicted small secreted protein                                            |
| G2583_4976             |         | Z5754  | ecnB | Entericidin B                                                               |
| G2583_4977             | ECs5129 | Z5755  | sugE | SugE                                                                        |
| G2583_4978             | ECs5130 | Z5756  | blc  | Outer membrane lipoprotein blc precursor                                    |
| G2583_4979             | ECs5131 | Z5757  | ampC | Beta-lactamase                                                              |
| G2583_4980             | ECs5132 | Z5758  | frdD | Fumarate reductase subunit D                                                |
| G2583_4981             | ECs5133 | Z5759  | frdC | Fumarate reductase subunit C                                                |
| G2583_4982             | ECs5134 | Z5760  | frdB | Fumarate reductase iron-sulfur subunit                                      |
| G2583_4983             | ECs5135 | Z5762  | frdA | Fumarate reductase, anaerobic, flavoprotein subunit                         |
| G2583_4984             | ECs5136 | Z5763  | poxA | Putative lysyl-tRNA synthetase                                              |
| G2583_4985             | ECs5137 | Z5764  | yjeM | Hypothetical transporter YjeM                                               |
| G2583_4986             | ECs5138 | Z5765  | yjeP | Mechanosensitive ion channel family protein                                 |

Table S10. The orthologue table of the O55 and O157 strains Page 160

| Locus_tag <sup>a</sup> |         |        | Gene | Product                                                      |
|------------------------|---------|--------|------|--------------------------------------------------------------|
| CB9615                 | Sakai   | EDL933 |      |                                                              |
| G2583_4987             | ECs5139 | Z5766  | psd  | Phosphatidylserine decarboxylase proenzyme                   |
| G2583_4988             | ECs5140 | Z5767  | rsgA | Probable GTPase engC precursor                               |
| G2583_4989             | ECs5141 | Z5768  | orn  | Oligoribonuclease                                            |
| G2583_4990             | glyV    | RNA124 | glyV | Gly tRNA                                                     |
| G2583_4991             | glyX    | RNA125 | glyX | Gly tRNA                                                     |
| G2583_4992             | glyY    | RNA126 | glyY | Gly tRNA                                                     |
| G2583_4993             | ECs5143 | Z5773  | yjeS | hypothetical protein                                         |
| G2583_4994             | ECs5142 | Z5774  | yjeF | hypothetical protein                                         |
| G2583_4995             | ECs5144 | Z5775  | yjeE | UPF0079 ATP-binding protein yjeE                             |
| G2583_4996             | ECs5145 | Z5776  | amiB | N-acetylmuramoyl-L-alanine amidase AmiB                      |
| G2583_4997             | ECs5146 | Z5777  | mutL | DNA mismatch repair protein MutL                             |
| G2583_4998             | ECs5147 | Z5778  | miaA | tRNA delta(2)-isopentenylpyrophosphate transferase           |
| G2583_4999             | ECs5148 | Z5779  | hfq  | RNA-binding protein Hfq                                      |
| G2583_5000             | ECs5149 | Z5780  | hflX | GTP-binding protein HflX                                     |
| G2583_5001             | ECs5150 | Z5781  | hflK | FtsH protease regulator HflK                                 |
| G2583_5002             | ECs5151 | Z5782  | hflC | FtsH protease regulator HflC                                 |
| G2583_5003             | ECs5152 | Z5783  | yjeT | hypothetical protein                                         |
| G2583_5004             | ECs5153 | Z5784  | purA | Adenylosuccinate synthetase                                  |
| G2583_5005             | ECs5154 | Z5785  | nsrR | transcriptional repressor NsrR                               |
| G2583_5006             | ECs5155 | Z5786  | rnr  | Putative enzyme                                              |
| G2583_5007             | ECs5156 | Z5787  | rlmB | 23S rRNA (guanosine-2'-O-)-methyltransferase rlmB            |
| G2583_5008             | ECs5157 | Z5788  | yjfl | hypothetical protein                                         |
| G2583_5009             | ECs5158 | Z5789  | yjfJ | PspA/IM30 family protein                                     |
| G2583_5010             | ECs5159 | Z5790  | yjfK | hypothetical protein                                         |
| G2583_5011             | ECs5160 | Z5791  | yjfL | hypothetical protein                                         |
| G2583_5012             | ECs5161 | Z5792  | yjfM | hypothetical protein                                         |
| G2583_5013             | ECs5162 | Z5793  | yjfC | Glutathionylspermidine synthase domain protein               |
| G2583_5014             | ECs5163 | Z5794  | aidB | Putative acyl coenzyme A dehydrogenase                       |
| G2583_5015             | ECs5164 | Z5795  | yjfN | hypothetical protein                                         |
| G2583_5016             | ECs5165 | Z5796  | yjfO | hypothetical protein                                         |
| G2583_5017             | ECs5166 | Z5799  | yjfP | Esterase yjfP                                                |
| G2583_5018             | ECs5167 | Z5800  | ulaR | putative DEOR-type transcriptional regulator                 |
| G2583_5019             | ECs5168 | Z5801  | ulaG | Predicted Zn-dependent hydrolases of the beta-lactamase fold |
| G2583_5020             | ECs5169 | Z5802  | ulaA | ascorbate-specific PTS system enzyme IIC                     |
| G2583_5021             | ECs5170 | Z5803  | ulaB | Ascorbate-specific phosphotransferase enzyme IIB component   |
| G2583_5022             | ECs5171 | Z5804  | ulaC | Ascorbate-specific phosphotransferase enzyme IIA component   |
| G2583_5023             | ECs5172 | Z5805  | ulaD | Putative hexulose-6-phosphate synthase                       |
| G2583_5024             | ECs5173 | Z5806  | ulaE | L-ribulose-5-phosphate 3-epimerase ulaE                      |
| G2583_5025             | ECs5174 | Z5807  | ulaF | L-ribulose-5-phosphate 4-epimerase ulaF                      |
| G2583_5026             | ECs5175 | Z5808  | yjfY | UPF0379 protein yjfY precursor                               |
| G2583_5027             | ECs5176 | Z5809  | rpsF | Ribosomal protein S6                                         |



Table S10. The orthologue table of the O55 and O157 strains Page 161

| Locus_tag <sup>a</sup> |         |        | Gene | Product                                                                                |
|------------------------|---------|--------|------|----------------------------------------------------------------------------------------|
| CB9615                 | Sakai   | EDL933 |      |                                                                                        |
| G2583_5028             | ECs5177 | Z5810  | priB | Primosomal replication protein n                                                       |
| G2583_5029             | ECs5178 | Z5811  | rpsR | 30S ribosomal protein S18                                                              |
| G2583_5030             | ECs5179 | Z5812  | rpII | 50S ribosomal protein L9                                                               |
| G2583_5031             | ECs5180 | Z5813  | yjZ  | hypothetical protein                                                                   |
| G2583_5033             |         | Z5814  | -    | hypothetical protein                                                                   |
| G2583_5032             | ECs5181 |        | -    | conserved hypothetical protein                                                         |
| G2583_5034             | ECs5182 | Z5815  | -    | Transposase, family                                                                    |
| G2583_5035             | ECs5183 | Z5816  | ydcM | IS605 family transposase orfB                                                          |
| G2583_5036             | ECs5184 | Z5817  | ytfB | hypothetical protein                                                                   |
| G2583_5037             | ECs5185 | Z5818  | fkIB | Peptidyl-prolyl cis-trans isomerase                                                    |
| G2583_5038             | ECs5186 | Z5819  | cycA | D-serine/D-alanine/glycine transporter                                                 |
| G2583_5039             | ECs5187 | Z5820  | ytfE | Regulator of cell morphogenesis and NO signaling                                       |
| G2583_5040             | ECs5188 | Z5821  | ytfF | Putative transmembrane subunit                                                         |
| G2583_5041             | ECs5190 | Z5822  | ytfG | NmrA family protein                                                                    |
| G2583_5042             | ECs5189 | Z5823  | ytfH | hypothetical protein                                                                   |
| G2583_5043             | ECs5191 | Z5824  | cpdB | 2',3'-cyclic-nucleotide 2'-phosphodiesterase                                           |
| G2583_5044             | ECs5192 | Z5825  | cysQ | PAPS (adenosine 3'-phosphate 5'-phosphosulfate)<br>3'(2'),5'-bisphosphate nucleotidase |
| G2583_5045             | ECs5193 | Z5826  | ytfI | hypothetical protein                                                                   |
| G2583_5046             | ECs5194 | Z5827  | ytfJ | hypothetical protein                                                                   |
| G2583_5047             | ECs5195 | Z5828  | ytfK | hypothetical protein                                                                   |
| G2583_5048             | ECs5196 | Z5829  | ytfL | UPF0053 inner membrane protein ytfL                                                    |
| G2583_5049             | ECs5197 | Z5830  | msrA | Peptide methionine sulfoxide reductase msrA                                            |
| G2583_5050             | ECs5198 | Z5831  | ytfM | hypothetical protein                                                                   |
| G2583_5051             | ECs5199 | Z5832  | ytfN | hypothetical protein                                                                   |
| G2583_5052             | ECs5200 | Z5833  | ytfP | UPF0131 protein ytfP                                                                   |
| G2583_5053             | ECs5201 | Z5834  | yzfA | Ile repressor (ileR)                                                                   |
| G2583_5054             | ECs5202 | Z5835  | chpS | PemI protein 2                                                                         |
| G2583_5055             | ECs5203 | Z5836  | chpB | PemK protein 2                                                                         |
| G2583_5056             | ECs5204 | Z5837  | ppa  | Inorganic pyrophosphatase                                                              |
| G2583_5057             | ECs5205 | Z5838  | ytfQ | Putative sugar ABC transporter, periplasmic sugar-binding protein                      |
| G2583_5058             | ECs5206 | Z5839  | ytfR | Uncharacterized ABC transporter ATP-binding protein                                    |
| G2583_5059             | ECs5207 | Z5840  | ytfT | Putative transport system permease protein                                             |
| G2583_5060             | ECs5208 | Z5841  | yjfF | Putative sugar ABC transporter, permease protein                                       |
| G2583_5061             | ECs5209 | Z5842  | fbp  | Fructose-1,6-bisphosphatase                                                            |
| G2583_5062             | ECs5210 | Z5843  | mpl  | UDP-N-acetylmuramate:L-alanyl-gamma-D-glutamyl-meso-diaminopimelate ligase             |
| G2583_5063             | ECs5211 | Z5844  | yjgA | UPF0307 protein yjgA                                                                   |
| G2583_5064             | ECs5212 | Z5845  | pmbA | Putative peptide maturation protein                                                    |
| G2583_5065             | ECs5213 | Z5846  | cybC | Soluble cytochrome b562 precursor                                                      |
| G2583_5066             | ECs5214 | Z5847  | nrdG | Anaerobic ribonucleoside-triphosphate reductase-activating protein                     |
| G2583_5067             | ECs5215 | Z5848  | nrdD | Anaerobic ribonucleoside-triphosphate reductase                                        |

Table S10. The orthologue table of the O55 and O157 strains Page 162

| Locus_tag <sup>a</sup> |         |        | Gene | Product                                                       |
|------------------------|---------|--------|------|---------------------------------------------------------------|
| CB9615                 | Sakai   | EDL933 |      |                                                               |
| G2583_5068             | ECs5216 | Z5849  | treC | Trehalase 6-P hydrolase                                       |
| G2583_5069             | ECs5217 | Z5850  | treB | PTS system, trehalose-specific IIBC component                 |
| G2583_5070             | ECs5218 | Z5851  | treR | Trehalose operon repressor                                    |
| G2583_5071             |         | Z5852  | -    | hypothetical protein                                          |
| G2583_5072             | ECs5219 | Z5853  | mgtA | Magnesium-transporting ATPase, P-type 1                       |
| G2583_5073             | ECs5220 | Z5854  | yjgF | hypothetical protein                                          |
| G2583_5074             | ECs5221 | Z5855  | pyrI | Aspartate carbamoyltransferase regulatory chain               |
| G2583_5075             | ECs5222 | Z5856  | pyrB | Aspartate carbamoyltransferase                                |
| G2583_5076             | ECs5224 | Z5857  | pyrL | PyrBI operon leader peptide                                   |
| G2583_5077             | ECs5223 | Z5858  | yjgG | hypothetical protein                                          |
| G2583_5078             |         | Z5859  | yjgG | ORF_o110                                                      |
| G2583_5079             | ECs5225 | Z5860  | yjgH | Endoribonuclease L-PSP family protein                         |
| G2583_5080             | ECs5226 | Z5861  | yjgI | Oxidoreductase, short chain dehydrogenase/reductase family    |
| G2583_5081             | ECs5228 | Z5862  | yjgJ | hypothetical protein                                          |
| G2583_5082             | ECs5229 | Z5864  | yjgK | hypothetical protein                                          |
| G2583_5083             | ECs5230 | Z5865  | yjgL | hypothetical protein                                          |
| G2583_5084             | ECs5231 | Z5866  | argI | Ornithine carbamoyltransferase                                |
| G2583_5085             | ECs5232 | Z5867  | rraB | hypothetical protein                                          |
| G2583_5086             | ECs5233 | Z5868  | yjgM | Acetyltransferase, GNAT family                                |
| G2583_5087             | ECs5234 | Z5869  | yjgN | hypothetical protein                                          |
| G2583_5088             | ECs5235 | Z5870  | valS | Valyl-tRNA synthetase                                         |
| G2583_5089             | ECs5236 | Z5871  | holC | DNA polymerase III, chi subunit                               |
| G2583_5090             | ECs5237 | Z5872  | pepA | Cytosol aminopeptidase                                        |
| G2583_5091             | ECs5238 | Z5873  | yjgP | Inner membrane protein yjgP                                   |
| G2583_5092             | ECs5239 | Z5874  | yjgQ | Inner membrane protein yjgQ                                   |
| G2583_5093             | ECs5240 | Z5875  | yjgR | hypothetical protein                                          |
| G2583_5094             | ECs5241 | Z5876  | yjgB | Alcohol dehydrogenase                                         |
| G2583_5095             | leuX    | RNA127 | leuX | Leu tRNA                                                      |
| Indel-197              | ECs5242 | Z5878  | -    | putative integrase                                            |
| Indel-197              | ECs5243 | Z5879  | -    | putative transposase OrfA protein of insertion sequence IS629 |
| Indel-197              | ECs5244 | Z5880  | -    | putative transposase OrfB protein of insertion sequence IS629 |
| Indel-197              | ECs5245 | Z5881  | -    | hypothetical protein                                          |
| Indel-197              | ECs5246 | Z5882  | -    | hypothetical protein                                          |
| Indel-197              |         | Z5883  | -    | hypothetical protein                                          |
| Indel-197              | ECs5247 |        | -    | hypothetical protein                                          |
| Indel-197              | ECs5248 | Z5884  | -    | hypothetical protein                                          |
| Indel-197              | ECs5249 | Z5885  | -    | putative resolvase                                            |
| Indel-197              | ECs5250 | Z5886  | -    | hypothetical protein                                          |
| Indel-197              | ECs5251 | Z5887  | -    | hypothetical protein                                          |
| Indel-197              | ECs5252 | Z5888  | -    | putative transcription regulator                              |
| Indel-197              |         | Z5889  | -    | hypothetical protein                                          |

Table S10. The orthologue table of the O55 and O157 strains Page 163

| Locus_tag <sup>a</sup> |         |        | Gene | Product                                                       |
|------------------------|---------|--------|------|---------------------------------------------------------------|
| CB9615                 | Sakai   | EDL933 |      |                                                               |
| G2583_5096             | ECs5253 | Z5890  | -    | Prophage P4 integrase                                         |
| G2583_5097             |         | Z5891  | -    | hypothetical protein                                          |
| G2583_5098             | ECs5254 | Z5892  | -    | hypothetical protein                                          |
| G2583_5099             | ECs5255 | Z5893  | yjhT | N-acetylneuraminate epimerase 2                               |
| G2583_5100             | ECs5256 | Z5894  | -    | hypothetical protein                                          |
| G2583_5101             | ECs5257 | Z5895  | -    | hypothetical protein                                          |
| G2583_5102             | ECs5258 | Z5896  | -    | hypothetical protein                                          |
| G2583_5103             | ECs5259 | Z5897  | -    | hypothetical protein                                          |
| G2583_5104             | ECs5260 | Z5898  | -    | hypothetical protein                                          |
| G2583_5105             | ECs5261 | Z5899  | -    | Helicase family protein                                       |
| G2583_5106             | ECs5262 | Z5900  | -    | hypothetical protein                                          |
| G2583_5107             | ECs5263 | Z5901  | -    | DEAD/DEAH box helicase domain protein                         |
| G2583_5108             | ECs5264 | Z5902  | -    | ATP-dependent DNA helicase, UvrD/REP family                   |
|                        |         | Z5903  | -    | hypothetical protein                                          |
|                        | ECs5265 |        | -    | hypothetical protein                                          |
| G2583_5109             | ECs5266 | Z5904  | -    | hypothetical protein                                          |
| G2583_5109             | ECs5267 |        | -    | hypothetical protein                                          |
| G2583_5110             | ECs5268 | Z5905  | yjhS | hypothetical protein                                          |
| G2583_5111             | ECs5269 | Z5906  | yjhT | N-acetylneuraminate-epimerase precursor                       |
| G2583_5112             | ECs5270 | Z5907  | nanC | hypothetical protein                                          |
| G2583_5113             | ECs5271 | Z5910  | fimB | Type 1 fimbriae regulatory protein fimB                       |
| G2583_5114             | ECs5272 | Z5911  | fimE | Type 1 fimbriae regulatory protein FimE                       |
| G2583_5115             | ECs5273 | Z5912  | fimA | Major type 1 subunit fimbrin                                  |
| G2583_5116             | ECs5274 | Z5913  | fimI | FimI fimbrial protein                                         |
| G2583_5117             | ECs5275 | Z5914  | fimC | Chaperone protein FimC                                        |
| G2583_5118             | ECs5276 | Z5915  | fimD | Export and assembly outer membrane protein of type 1 fimbriae |
| G2583_5119             | ECs5277 | Z5916  | fimF | Fimbrial protein FimF                                         |
| G2583_5120             | ECs5278 | Z5917  | fimG | FimG                                                          |
| G2583_5121             | ECs5279 | Z5918  | fimH | Adhesin                                                       |
| G2583_5122             | ECs5280 | Z5919  | gntP | High-affinity gluconate transporter                           |
| G2583_5123             | ECs5281 | Z5920  | uxuA | D-mannonate dehydratase                                       |
| G2583_5124             | ECs5282 | Z5921  | uxuB | Fructuronate reductase                                        |
| G2583_5125             | ECs5283 | Z5922  | uxuR | DNA-binding transcriptional repressor                         |
| G2583_5126             | ECs5284 | Z5923  | yjiC | hypothetical protein                                          |
| G2583_5127             |         | Z5924  | -    | hypothetical protein                                          |
| G2583_5128             | ECs5285 | Z5925  | yjiD | Anti-adaptor protein iraD                                     |
| G2583_5129             | ECsp024 | Z5926  | yjiE | transcriptional regulator, LysR family                        |
| G2583_5130             | ECs5286 | Z5927  | iadA | Beta-aspartyl peptidase                                       |
| G2583_5131             | ECs5287 | Z5928  | yjiG | putative membrane protein                                     |
| G2583_5132             | ECs5288 | Z5929  | yjiH | hypothetical protein                                          |
| G2583_5133             | ECs5289 | Z5930  | yjiI | Putative uncharacterized protein yjiI                         |
| G2583_5133             |         |        | yjiI | Putative uncharacterized protein yjiI                         |
| G2583_5134             | ECs5290 | Z5932  | yeeJ | Putative invasin                                              |

Table S10. The orthologue table of the O55 and O157 strains Page 164

| Locus_tag <sup>a</sup> |         |        | Gene | Product                                                                   |
|------------------------|---------|--------|------|---------------------------------------------------------------------------|
| CB9615                 | Sakai   | EDL933 |      |                                                                           |
|                        | ECs5291 |        | -    | hypothetical protein                                                      |
| G2583_5134             | ECs5292 |        | yeeJ | Putative invasin                                                          |
| G2583_5135             | ECs5293 | Z5933  | yjiJ | Transporter, major facilitator family                                     |
| G2583_5136             | ECs5294 | Z5934  | yjiK | SdiA-regulated protein                                                    |
| G2583_5137             | ECs5295 | Z5935  | -    | hypothetical protein                                                      |
| G2583_5138             | ECs5296 |        | -    | hypothetical protein                                                      |
| G2583_5139             | ECs5297 | Z5936  | yjiL | (R)-2-hydroxyglutaryl-CoA dehydratase activator                           |
| G2583_5140             | ECs5298 | Z5937  | yjiM | hypothetical protein                                                      |
| G2583_5141             | ECs5299 | Z5938  | yjiN | conserved hypothetical protein                                            |
| G2583_5142             | ECs5300 | Z5939  | mdtM | Multidrug resistance protein mdtM                                         |
| G2583_5143             | ECs5301 | Z5940  | yjiP | hypothetical protein                                                      |
| G2583_5144             | ECs5302 | Z5941  | yjiR | transcriptional regulator, GntR family/aminotransferase, classes I and II |
| G2583_5145             | ECs5303 | Z5942  | yjiS | YjiS                                                                      |
| G2583_5146             | ECs5304 | Z5943  | -    | hypothetical protein                                                      |
| G2583_5146             | ECs5305 | Z5944  | -    | hypothetical protein                                                      |
| G2583_5147             |         | Z5945  | yjiW | HSP20-like domain protein                                                 |
| G2583_5148             | ECs5306 | Z5946  | hsdS | type I restriction-modification system, S subunit                         |
| G2583_5149             | ECs5307 | Z5947  | hsdM | Type I restriction-modification system, M subunit                         |
| G2583_5150             | ECs5308 | Z5948  | hsdR | Type I restriction-modification system, R subunit                         |
| G2583_5151             | ECs5309 | Z5949  | -    | protein of unknown function DUF262                                        |
| G2583_5152             | ECs5310 | Z5950  | orf  | protein of unknown function DUF262                                        |
| G2583_5153             | ECs5311 | Z5951  | yjiA | Putative GTPase                                                           |
| G2583_5154             | ECs5312 | Z5952  | yjiX | hypothetical protein                                                      |
| G2583_5155             | ECs5313 | Z5953  | yjiY | Carbon starvation family protein                                          |
| G2583_5156             | ECs5314 | Z5954  | -    | hypothetical protein                                                      |
| G2583_5157             | ECs5315 | Z5955  | tsr  | Methyl-accepting chemotaxis protein I                                     |
| G2583_5158             | ECs5316 | Z5956  | yjiL | Transporter, major facilitator family                                     |
| G2583_5159             | ECs5317 | Z5957  | yjiM | transcriptional regulator, GntR family                                    |
| G2583_5160             | ECs5318 | Z5958  | yjiN | Putative oxidoreductase                                                   |
| G2583_5161             | ECs5319 | Z5959  | mdoB | Phosphoglycerol transferase I                                             |
| G2583_5162             | ECs5320 | Z5960  | yjiA | hypothetical protein                                                      |
| G2583_5163             | ECs5321 | Z5961  | dnaC | DNA replication protein DnaC                                              |
| G2583_5164             | ECs5322 | Z5962  | dnaT | Primosomal protein 1                                                      |
| G2583_5165             | ECs5323 | Z5963  | yjiB | Uncharacterized conserved protein                                         |
| G2583_5166             | ECs5324 | Z5964  | yjiP | putative structural protein                                               |
| G2583_5167             | ECs5325 | Z5966  | yjiQ | hypothetical protein                                                      |
| G2583_5168             | ECs5326 | Z5967  | bglJ | transcriptional regulator, LuxR family                                    |
| G2583_5169             | ECs5327 | Z5968  | fhuF | Ferric iron reductase protein FhuF                                        |
| G2583_5170             | ECs5328 |        | yjiZ | hypothetical protein                                                      |
| G2583_5171             | leuQ    | RNA128 | leuQ | Leu tRNA                                                                  |
| G2583_5172             | ECs5329 | Z5972  | rsmC | 16S RNA G1207 methylase RsmC                                              |
| G2583_5173             | ECs5330 | Z5973  | holD | DNA polymerase III, psi subunit                                           |
| G2583_5174             | ECs5331 | Z5974  | rimI | Ribosomal-protein-alanine acetyltransferase                               |

Table S10. The orthologue table of the O55 and O157 strains Page 165

| Locus_tag <sup>a</sup> |           |           | Gene   | Product                                                       |
|------------------------|-----------|-----------|--------|---------------------------------------------------------------|
| CB9615                 | Sakai     | EDL933    |        |                                                               |
| G2583_5175             | ECs5332   | Z5975     | yjjG   | 5'-nucleotidase yjjG                                          |
| G2583_5176             | Indel-202 | Indel-202 | -      | Phage integrase                                               |
| G2583_5177             | Indel-202 | Indel-202 | -      | hypothetical protein                                          |
| G2583_5178             | Indel-202 | Indel-202 | yfdT   | hypothetical protein                                          |
| G2583_5179             | Indel-202 | Indel-202 | yfdS   | hypothetical protein                                          |
| G2583_5180             | Indel-202 | Indel-202 | yfdR   | hypothetical protein                                          |
| G2583_5181             | Indel-202 | Indel-202 | yfdQ   | hypothetical protein                                          |
| G2583_5182             | Indel-202 | Indel-202 | yfdP   | hypothetical protein                                          |
| G2583_5183             | Indel-202 | Indel-202 | -      | hypothetical protein                                          |
| G2583_5184             | Indel-202 | Indel-202 | rpc    | Putative regulatory protein                                   |
| G2583_5185             | Indel-202 | Indel-202 | -      | hypothetical protein                                          |
| G2583_5186             | Indel-202 | Indel-202 | ymfL   | hypothetical protein                                          |
| G2583_5187             | Indel-202 | Indel-202 | ymfM   | e14 prophage; predicted protein                               |
| G2583_5188             | Indel-202 | Indel-202 | yfdO   | Unknown protein encoded by cryptic prophage                   |
| G2583_5189             | Indel-202 | Indel-202 | yfdN   | hypothetical protein                                          |
| G2583_5190             | Indel-202 | Indel-202 | yfdM   | putative DNA adenine methylase                                |
| G2583_5191             | Indel-202 | Indel-202 | -      | hypothetical protein                                          |
| G2583_5192             | Indel-202 | Indel-202 | rusA   | Holliday junction resolvase                                   |
| G2583_5193             | Indel-202 | Indel-202 | KilA-N | KilA-N domain family                                          |
| G2583_5194             | Indel-202 | Indel-202 | ydfU   | hypothetical protein                                          |
| G2583_5195             | Indel-202 | Indel-202 | ydfT   | Antitermination protein Q                                     |
| G2583_5196             | Indel-202 | Indel-202 | cspF   | Cold shock-like protein cspF                                  |
| G2583_5197             | Indel-202 | Indel-202 | cspB   | Cold shock-like protein cspB                                  |
| G2583_5198             | Indel-202 | Indel-202 | essQ   | Lysis protein S-like from lambdoid prophage Qin               |
| G2583_5199             | Indel-202 | Indel-202 | ydfR   | hypothetical protein                                          |
| G2583_5200             | Indel-202 | Indel-202 | -      | hypothetical protein                                          |
| G2583_5201             | Indel-202 | Indel-202 | ydfQ   | phage lysozyme                                                |
| G2583_5202             | Indel-202 | Indel-202 | ydfP   | hypothetical protein                                          |
| G2583_5203             | Indel-202 | Indel-202 | cspI   | Cold shock-like protein cspI                                  |
| G2583_5204             | Indel-202 | Indel-202 | ynfN   | hypothetical protein                                          |
| G2583_5205             | Indel-202 | Indel-202 | gnsB   | GnsB protein                                                  |
| G2583_5206             | Indel-202 | Indel-202 | ybcW   | conserved hypothetical protein                                |
| G2583_5207             | Indel-202 | Indel-202 | ylcI   | hypothetical protein                                          |
| G2583_5208             | Indel-202 | Indel-202 | nohA   | Prophage Qin DNA packaging protein NU1-like protein           |
| G2583_5209             | Indel-202 | Indel-202 | -      | Putative DNA packaging protein of prophage                    |
| G2583_5210             | Indel-202 | Indel-202 | -      | Head-stabilizing protein                                      |
| G2583_5211             | Indel-202 | Indel-202 | -      | Putative capsid protein of prophage                           |
| G2583_5212             | Indel-202 | Indel-202 | -      | Head-tail preconnector protein GP5                            |
| G2583_5213             | Indel-202 | Indel-202 | -      | Head decoration protein                                       |
| G2583_5214             | Indel-202 | Indel-202 | -      | Major head protein                                            |
| G2583_5215             | Indel-202 | Indel-202 | -      | Uncharacterized 13.5 kDa protein in GP7-GP8 intergenic region |
| G2583_5216             | Indel-202 | Indel-202 | -      | Putative head-tail joining protein of prophage                |
| G2583_5217             | Indel-202 | Indel-202 | -      | Prophage minor tail protein Z                                 |

Table S10. The orthologue table of the O55 and O157 strains Page 166

| Locus_tag <sup>a</sup> |           |           | Gene | Product                                                                        |
|------------------------|-----------|-----------|------|--------------------------------------------------------------------------------|
| CB9615                 | Sakai     | EDL933    |      |                                                                                |
| G2583_5218             | Indel-202 | Indel-202 | -    | Permeases of the major facilitator superfamily                                 |
| G2583_5219             | Indel-202 | Indel-202 | -    | Putative tail component of prophage                                            |
| G2583_5220             | Indel-202 | Indel-202 | -    | Putative tail component of prophage                                            |
| G2583_5221             | Indel-202 | Indel-202 | -    | Minor tail protein T                                                           |
| G2583_5222             | Indel-202 | Indel-202 | -    | Putative tail length tape measure protein                                      |
| G2583_5223             | Indel-202 | Indel-202 | -    | Minor tail protein                                                             |
| G2583_5224             | Indel-202 | Indel-202 | -    | Phage-related protein                                                          |
| G2583_5225             | Indel-202 | Indel-202 | -    | Putative tail fiber component K of prophage                                    |
| G2583_5226             | Indel-202 | Indel-202 | -    | Putative tail component of prophage CP-933K                                    |
| G2583_5227             | Indel-202 | Indel-202 | -    | hypothetical protein                                                           |
| G2583_5228             | Indel-202 | Indel-202 | -    | Phage-related protein, tail component                                          |
| G2583_5229             | Indel-202 | Indel-202 | -    | putative membrane protein precursor                                            |
| G2583_5230             | Indel-202 | Indel-202 | -    | PPE-repeat proteins                                                            |
| G2583_5231             | Indel-202 | Indel-202 | tfaQ | Tail fiber assembly protein homolog from lambdoid prophage Qin                 |
| G2583_5232             | Indel-202 | Indel-202 | pinR | Putative DNA-invertase from lambdoid prophage                                  |
| G2583_5233             | Indel-202 | Indel-202 | ydfK | hypothetical protein                                                           |
| G2583_5234             | Indel-202 | Indel-202 | -    | hypothetical protein                                                           |
| G2583_5235             | ECs5333   | Z5976     | prfC | Peptide chain release factor RF-3                                              |
| G2583_5236             | ECs5334   | Z5977     | osmY | Osmotically inducible protein Y                                                |
|                        |           | Z5978     | -    | hypothetical protein                                                           |
| G2583_5237             | ECs5335   | Z5979     | yjjU | hypothetical protein                                                           |
| G2583_5238             | ECs5336   | Z5980     | yjjV | Hydrolase, TatD family                                                         |
| G2583_5239             | ECs5337   | Z5981     | yjjW | Putative activating enzyme                                                     |
| G2583_5240             | ECs5338   | Z5982     | yjjI | hypothetical protein                                                           |
| G2583_5240             | ECs5339   | Z5982     | yjjI | hypothetical protein                                                           |
| G2583_5241             | ECs5340   | Z5983     | deoC | Deoxyribose-phosphate aldolase                                                 |
| G2583_5242             | ECs5341   | Z5984     | deoA | Thymidine phosphorylase                                                        |
| G2583_5243             | ECs5342   | Z5985     | deoB | Phosphopentomutase                                                             |
| G2583_5244             | ECs5343   | Z5986     | deoD | Purine nucleoside phosphorylase                                                |
| G2583_5245             | ECs5344   | Z5987     | -    | Helix-turn-helix domain protein                                                |
| G2583_5246             | ECs5345   | Z5988     | lplA | protein smp precursor                                                          |
| G2583_5247             | ECs5346   | Z5989     | serB | Phosphoserine phosphatase                                                      |
| G2583_5248             | ECs5347   | Z5990     | radA | Predicted ATP-dependent serine protease                                        |
| G2583_5249             | ECs5348   | Z5991     | nadR | bifunctional DNA-binding transcriptional repressor and NMN adenylyltransferase |
| G2583_5250             | ECs5349   | Z5993     | yjjK | Uncharacterized ABC transporter ATP-binding protein                            |
| G2583_5251             | ECs5350   | Z5994     | slt  | Soluble lytic murein transglycosylase                                          |
| G2583_5252             | ECs5351   | Z5995     | trpR | Trp operon repressor                                                           |
| G2583_5253             | ECs5352   | Z5996     | yjjX | conserved hypothetical protein                                                 |
| G2583_5254             | ECs5353   | Z5997     | ytjC | Probable phosphoglycerate mutase gpmB                                          |
| G2583_5255             | ECs5354   | Z5999     | rob  | Right origin-binding protein                                                   |
| G2583_5256             | ECs5355   | Z6000     | creA | hypothetical protein                                                           |
| G2583_5257             | ECs5356   | Z6001     | creB | DNA-binding response regulator CreB                                            |

Table S10. The orthologue table of the O55 and O157 strains Page 167

| Locus_tag <sup>a</sup> |         |        | Gene | Product                                     |
|------------------------|---------|--------|------|---------------------------------------------|
| CB9615                 | Sakai   | EDL933 |      |                                             |
| G2583_5258             | ECs5357 | Z6002  | creC | sensory histidine kinase CreC               |
| G2583_5259             | ECs5358 | Z6003  | creD | Inner membrane protein CreD                 |
| G2583_5260             | ECs5359 | Z6004  | arcA | Aerobic respiration control protein arcA    |
| G2583_5261             | ECs5360 | Z6005  | yjyY | hypothetical protein                        |
| G2583_5262             | ECs5361 | Z6006  | yjtD | RNA methyltransferase, TrmH family, group 1 |

<sup>a</sup> rRNA and tRNA genes in Sakai and EDL933 lack locus\_tags, gene name is given as a substitute.

Some genes were not predicted in one or two of the genomes and left as a blank cell. All insertion or deletion of genes are described in the number of the indels.

In some cases a gene in one genome was annotated as 2 or more genes in other genomes, and the same gene name appears 2 or more times for a genome. This may be due to mutation to stop codon, frameshift mutation or sequencing errors.
