# Supplementary material for: Derivation of Escherichia coli O157:H7 from Its O55:H7 Precursor
Source: PubMed Central journal article supplement (PMC2806823; doi:10.1371/journal.pone.0008700), 2010-01-14
Supplement: pone.0008700.s013.pdf [file pone.0008700.s013.pdf]

**Table S11.** Comparison of the phages in the O55:H7 and the 2 O157:H7 strains

| CB9615                 |                 |                   |        | Sakai |                 |                   |        | EDL933                           |                                    |                   |        | Comparisons                                   |                                          |
|------------------------|-----------------|-------------------|--------|-------|-----------------|-------------------|--------|----------------------------------|------------------------------------|-------------------|--------|-----------------------------------------------|------------------------------------------|
| name                   | site            | Type <sup>c</sup> | length | name  | site            | Type <sup>c</sup> | length | name                             | site                               | Type <sup>c</sup> | length | CB9615/Sakai <sup>d</sup>                     | EDL933/Sakai <sup>d</sup>                |
| Ep1                    | 302638-351615   | Lambda-like       | 48,949 | Sp1   | 300041-310626   | Lambda-like       | 10,586 | CP-933H                          | 300042-310627                      | Lambda-like       | 10,586 | replacement                                   | 100% 2kb inv                             |
| Ep2                    | 351616-364486   | P4-like           | 12,871 | Sp2   | 310627-323513   | P4-like           | 12,887 | CP-933I                          | 310628-323514                      | P4-like           | 12,887 | 12.9kb rec                                    | 100%                                     |
| Ep3                    | 697268-746682   |                   | 49,415 | -     | -               |                   |        | -                                | -                                  |                   |        | ins                                           | -                                        |
| Ep4                    | 980716-1026738  | Lambda-like       | 46,023 | Sp3   | 891123-929708   | Lambda-like       | 38,586 | CP-933K                          | 892772-931359                      | Lambda-like       | 38,588 | 99.17% 4.4kb rec, 7.4kb ins                   | 99.97% 0.3kb rec                         |
| -                      | -               |                   |        | Sp4   | 1161091-1210740 | Lambda-like       | 49,650 | CP-933M                          | 1250314-1294565                    | Lambda-like       | 44,252 | -                                             | 99.97% 1.1kb rec, 28.2k ins, 32.6k del   |
| -                      | -               |                   |        | Sp5   | 1246012-1308719 | Lambda-like       | 62,708 | BP-933W                          | 1330829-1392491                    | Lambda-like       | 61,663 | -                                             | 99.99% 5.4kb rec, 10.6k ins, 11.6k del   |
| -                      | -               |                   |        | Sp6   | 1541470-1589892 | Lambda-like       | 48,423 | CP-933N                          | 1626566-1673868                    | Lambda-like       | 47,303 | -                                             | 99.96% 1.1kb rec, 20k ins, 21.1k del     |
| Ep5                    | 1444732-1455388 | P4-like           | 10,657 | Sp7   | 1594570-1610032 |                   | 15,463 | CP-933C                          | 1678546-1694005                    |                   | 15,460 | replacement                                   | 99.95%                                   |
| elbA-ypjA <sup>a</sup> | 1463904-1478380 |                   | 14,477 | Sp8   | 1618153-1665049 | Lambda-like       | 46,897 | CP-933X                          | 1702126-1756455                    | Lambda-like       | 54,330 | replacement                                   | 99.96% 1.3kb rec, 15.1kb ins, 7.7kb del  |
| Ep6                    | 1574754-1627761 | Lambda-like       | 53,008 | Sp9   | 1757506-1815680 | Lambda-like       | 58,175 | CP-933O-1 & CP-933P <sup>b</sup> | 1849445-1868506<br>2292538-2271497 | Lambda-like       | 40,104 | 99.78% 1.3kb rec, 40.7kb ins, 27.8-45.9kb del | 99.99% 0.7kb rec, 4k ins, 22.1kb del     |
| Ep7                    | 1732190-1777066 | Lambda-like       | 44,877 | Sp10  | 1921414-1972525 | Lambda-like       | 51,112 | CP-933R                          | 2165752-2115956                    | Lambda-like       | 49,797 | 99.83% 1.3kb rec, 37.8kb ins, 43-44kb del     | 99.99% 1.4kb rec, 22.8kb ins, 24.2kb del |
| -                      | -               |                   |        | Sp11  | 2158174-2203951 | Lambda-like       | 45,778 | CP-933O-2                        | 1930297-1878765                    | Lambda-like       | 51,533 | -                                             | 99.97% 6.1kb rec, 32.9kb ins, 27.2kb del |
| Ep8                    | 1967051-1988518 | Lambda-like       | 21,468 | Sp12  | 2203952-2250093 | Lambda-like       | 46,142 | CP-933O-1 & CP-933P <sup>b</sup> | 1878764-1872344<br>2280925-2325378 | Lambda-like       | 50,875 | replacement                                   | 99.96% 0.2k rec, 4.1kb ins, 8.9kb del    |
| Ep9                    | 1988519-2009859 | Lambda-like       | 21,341 | -     | -               |                   |        | -                                | -                                  |                   |        | ins                                           | -                                        |
| Ep10                   | 2152246-2187996 | P2-like           | 35,751 | -     | -               |                   |        | -                                | -                                  |                   |        | ins                                           | -                                        |
| -                      | -               |                   |        | Sp13  | 2592901-2614020 | P2-like           | 21,120 | CP-933T                          | 2668112-2689231                    | P2-like           | 21,120 | -                                             | 99.96%                                   |
| Ep11                   | 2437795-2486743 | Lambda-like       | 48,949 | Sp14  | 2668007-2712035 | Lambda-like       | 44,029 | CP-933U                          | 2743224-2788400                    | Lambda-like       | 45,177 | replacement                                   | 99.97% 5kb rec, 25.6kb ins, 24.4 kb del  |
| -                      | -               |                   |        | Sp15  | 2895926-2943804 | Lambda-like       | 47,879 | CP-933V                          | 2966157-3015071                    | Lambda-like       | 48,915 | -                                             | 99.97% 17.2kb rec, 21.2kb ins 20.2kb del |
| Ep12                   | 2934049-2942599 | P22-like          | 8,551  | Sp16  | 3192983-3201533 | P22-like          | 8,551  | CP-22                            | 3262939-3271489                    | P22-like          | 8,551  | 99.94%                                        | 99.96%                                   |
| Ep13                   | 3161159-3202641 |                   | 41,483 | -     | -               |                   |        | -                                | -                                  |                   |        | ins                                           | -                                        |
| Ep14                   | 3258501-3337894 | Lambda-like       | 79,394 | Sp17  | 3475965-3500163 | Lambda-like       | 24,199 | CP-933Y                          | 3545814-3567453                    | Lambda-like       | 21,640 | 99.85% 8.7kb rec, 35.1kb ins, 7.8-10.3kb del  | 99.97% 0.1kb rec, 1.5kb ins 4kb del      |
| -                      | -               |                   |        | Sp18  | 5040843-5079601 | Mu-like           | 38,759 | -                                | -                                  |                   |        | -                                             | -                                        |
| Ep15                   | 5306033-5355424 | Lambda-like       | 49,392 | -     | -               |                   |        | -                                | -                                  |                   |        | ins                                           | -                                        |
| -                      | -               |                   |        | SpLE1 | 1370456-1456704 | CP4-like          | 86,249 | SpLE1                            | 1454228-1541789                    | CP4-like          | 87,562 | -                                             | 99.97% 0.1kb rec, 1.3kb ins              |
| -                      | -               |                   |        | -     | -               |                   |        | SpLE1 copy                       | 1058621-1146183                    | CP4-like          | 87,563 | -                                             | 99.98%                                   |
| EpLE1                  | 2510337-2531200 |                   | 20,864 | SpLE2 | 2738079-2751537 |                   | 13,459 | SpLE2                            | 2814443-2821749                    |                   | 7,307  | replacement                                   | 99.99% 0.4kb rec, 6.1kb del              |
| EpLE2                  | 3675949-3704076 |                   | 28,127 | SpLE3 | 3852036-3875489 |                   | 23,454 | SpLE3                            | 3919348-3942802                    |                   | 23,455 | 99.92% 0.04kb rec, 8.4kb ins, 3.4kb del       | 99.97%                                   |
| EpLE3                  | 4470809-4511806 |                   | 40,998 | SpLE4 | 4580864-4624313 |                   | 43,450 | SpLE4                            | 4649847-4693296                    |                   | 43,450 | 99.93% 2.4kb del-ISEc8                        | 99.99%                                   |
| -                      | -               |                   |        | SpLE5 | 5347085-5357319 | CP-4 like         | 10,235 | SpLE5                            | 5377088-5387322                    | CP-4 like         | 10,235 | -                                             | 99.99% 9bp rec                           |
| EpLE4                  | 5195636-5229783 |                   | 34,148 | SpLE6 | 5357371-5391518 |                   | 34,148 | SpLE6                            | 5387374-5421521                    |                   | 34,148 | 99.94%                                        | 99.98%                                   |

<sup>a</sup>This region is not the phage and was deleted in O157 lineage.

<sup>b</sup>These 2 phages at the ends of the inversion in EDL933.

<sup>c</sup>The phage type in Sakai was based on the Hayashi *et al.*[25]. The phage types in other 2 genomes were based on similarity to known phages in GenBank.

<sup>d</sup>Replacement: the phages are inserted at the same site but different in sequence; The percentage ratio shows the divergence in conserved region. rec: recombination region. ins: insert in phages; del: deletion in phages compared to phages in Sakai
