# Supplementary material for: Derivation of Escherichia coli O157:H7 from Its O55:H7 Precursor
Source: PubMed Central journal article supplement (PMC2806823; doi:10.1371/journal.pone.0008700), 2010-01-14
Supplement: pone.0008700.s014.pdf [file pone.0008700.s014.pdf]

| Effector <sup>a</sup> | Family <sup>b</sup> | Sakai ID  | identities <sup>c</sup> | CB9615 ID     | identities <sup>c</sup> | E2348/69 ID  | identities <sup>c</sup> |
|-----------------------|---------------------|-----------|-------------------------|---------------|-------------------------|--------------|-------------------------|
| EspX1                 | PPR                 | ECs0025   | 22.14                   | G2583_0023    | 22.14                   | -            | -                       |
| EspY1                 | SopD-N              | ECs0061   | 33.93                   | G2583_0060    | 33.93                   | -            | -                       |
| EspY2                 | SopD-N              | ECs0073   | -                       | G2583_0072    | -                       | -            | -                       |
| EspY3                 | SopD-N; PRR         | ECs0472   | 23.48                   | G2583_0530    | 23.48                   | -            | -                       |
| NleB2-1               | NleB                | ECs0846   | 61.54                   | G2583_0995    | 61.54                   | E2348_C_1041 | 61.54                   |
| NleC                  | NleC                | ECs0847   | 90.3                    | G2583_0996    | 90.3                    | E2348_C_1042 | 90.61                   |
| NleH1-1               | NleH                | ECs0848   | 83.28                   | G2583_0998    | 83.28                   | E2348_C_1043 | 85.19                   |
| NleD                  | NleD                | ECs0850   | 75.74                   | G2583_1000    | 76.6                    | E2348_C_1044 | 76.6                    |
| EspX2                 | PPR; LRR            | ECs0876   | 25.74                   | G2583_1026    | 25.41                   | -            | -                       |
| EspF2-1               | EspF                | ECs1126   | 35.85                   | -             | -                       | -            | -                       |
| EspV                  | AvrA                | ECs1127   | 46.3                    | -             | -                       | -            | -                       |
| EspX7                 | PPR                 | ECs1560   | 33.39                   | -             | -                       | -            | -                       |
| EspN                  | CNF                 | ECs1561   | 37.57                   | -             | -                       | -            | -                       |
| NleB2-2               | NleB                | ECs1566   | 72.97                   | G2583_0347    | 66.03                   | -            | -                       |
| EspO1-1               | OspE                | ECs1567   | 44.64                   | G2583_0348    | 41.51                   | -            | -                       |
| EspK                  | LRR                 | ECs1568   | 31.44                   | G2583_0349/50 | 31.44                   | -            | -                       |
| NleG2-1               | NleG                | ECs1810/1 | 60.91                   | -             | -                       | -            | -                       |
| NleA                  | NleA                | ECs1812   | 81.26                   | pO55_0114     | 81.72                   | E2348_C_1442 | 81.22                   |
| NleH1-2               | NleH                | ECs1814   | 81.19                   | G2583_1592    | 81.19                   | E2348_C_1444 | 81.19                   |
| NleF                  | NleF                | ECs1815   | 85.19                   | G2583_1593    | 85.19                   | E2348_C_1445 | 85.19                   |
| EspO1-2               | OspE                | ECs1821   | 37.74                   | -             | -                       | E2348_C_1447 | 37.74                   |
| NleG-1                | NleG                | ECs1824   | 39.22                   | G2583_0343    | 40                      | -            | -                       |
| EspM1                 | IpgB                | ECs1825   | 32.94                   | G2583_0344    | 25                      | -            | -                       |
| NleG9                 | NleG                | ECs1828   | 38.32                   | -             | -                       | -            | -                       |
| NleG2-2               | NleG                | ECs1994   | 60                      | G2583_1748    | 59.09                   | -            | -                       |
| NleG6-1               | NleG                | ECs1995   | 41.12                   | G2583_1749    | 39.25                   | -            | -                       |
| NleG5-1               | NleG                | ECs1996   | 48.45                   | G2583_1750    | 48.45                   | -            | -                       |
| EspR1                 | LRR                 | ECs2073   | 25.64                   | G2583_1832    | 24.07                   | -            | -                       |
| EspR2                 | LRR                 | ECs2074/5 | 31.91                   | G2583_1833/4  | 31.91                   | -            | -                       |
| NleG5-2               | NleG                | ECs2154   | 49.48                   | -             | -                       | -            | -                       |
| NleG6-2               | NleG                | ECs2155   | 42.71                   | -             | -                       | -            | -                       |
| NleG2-3               | NleG                | ECs2156   | 59.09                   | -             | -                       | -            | -                       |
| NleG7                 | NleG                | ECs2226   | 38.1                    | G2583_1913    | 37.01                   | -            | -                       |
| NleG3                 | NleG                | ECs2227/8 | 40.48                   | G2583_1914/5  | 40.48                   | -            | -                       |
| NleG2-4               | NleG                | ECs2229   | 67.01                   | G2583_1916    | 46.02                   | E2348_C_1040 | 44.33                   |
| EspL1                 | AR                  | ECs2427   | 21.47                   | G2583_2167    | 21.47                   | E2348_C_1849 | -                       |
| EspR3                 | LRR                 | ECs2672   | 30.28                   | G2583_2384    | 30.28                   | -            | -                       |
| EspR4                 | LRR                 | ECs2674   | 30.99                   | G2583_2386    | 30.99                   | -            | -                       |
| EspJ                  | EspJ                | ECs2714   | 22.83                   | G2583_2428    | 22.83                   | E2348_C_0723 | 34                      |
| TccP                  | EspF                | ECs2715   | 34.67                   | G2583_2429    | 32.29                   | -            | -                       |
| EspM2                 | IpgB                | ECs3485   | 25                      | G2583_3204    | 25                      | -            | -                       |
| NleG8-2               | NleG                | ECs3486   | 40                      | G2583_3205    | 36.25                   | -            | -                       |
| EspW                  | HopW                | ECs3487   | 30.35                   | G2583_0342    | 35.19                   | -            | -                       |
| NleG6-3               | NleG                | ECs3488   | 40.37                   | -             | -                       | -            | -                       |
| EspL2                 | AR                  | ECs3855   | 38.98                   | G2583_3637    | 38.79                   | E2348_C_3230 | 38.79                   |
| NleB1                 | NleB                | ECs3857   | 100                     | G2583_3638    | 100                     | E2348_C_3231 | 97.87                   |
| NleE-1                | NleE                | ECs3858   | 86.16                   | G2583_3639    | 86.16                   | E2348_C_3232 | 85.71                   |
| EspF1                 | EspF                | ECs4550   | 100                     | G2583_4405    | 95.67                   | E2348_C_3930 | 100                     |
| EspB                  | EspB                | ECs4554   | 30.77                   | G2583_4409    | 30.77                   | E2348_C_3934 | 26.32                   |
| Tir                   | Tir                 | ECs4561   | 100                     | G2583_4416    | 99.64                   | E2348_C_3941 | 100                     |
| Map                   | IpgB                | ECs4562   | 28.37                   | G2583_4417    | 28.37                   | E2348_C_3942 | 22.76                   |
| EspH                  | EspH                | ECs4564   | -                       | G2583_4419    | -                       | E2348_C_3944 | -                       |
| EspZ                  | EspZ                | ECs4571   | 100                     | G2583_4426    | 100                     | E2348_C_3951 | 100                     |
| EspG1                 | EspG                | ECs4590   | 100                     | G2583_4444    | 100                     | E2348_C_3970 | 100                     |
| EspL3                 | AR                  | ECs4642/3 | 23.38                   | G2583_4495/6  | 23.38                   | -            | -                       |
| EspY4                 | SopD-N              | ECs4653   | 26.09                   | G2583_4507    | 26.09                   | -            | -                       |
| EspX3                 | PPR                 | ECs4654/5 | 26.09                   | G2583_4508/9  | 26.09                   | -            | -                       |
| EspY5                 | SopD-N              | ECs4657   | 22.93                   | G2583_4511    | 22.93                   | -            | -                       |
| EspL4                 | AR                  | ECs4935   | 23.05                   | G2583_4834    | 23.05                   | -            | -                       |
| EspX4                 | PPR                 | ECs5021   | 22.95                   | G2583_4863    | 22.95                   | -            | -                       |
| EspX5                 | PPR                 | ECs5048   | 24.1                    | G2583_4891    | 24.62                   | -            | -                       |
| EspX6                 | PPR                 | ECs5295   | 22.57                   | G2583_5137    | 20.9                    | -            | -                       |

| Effector <sup>a</sup> | Family <sup>b</sup> | Sakai ID | identities <sup>c</sup> | CB9615 ID  | identities <sup>c</sup> | E2348/69 ID  | identities <sup>c</sup> |
|-----------------------|---------------------|----------|-------------------------|------------|-------------------------|--------------|-------------------------|
| NleG-2                | NleG                | -        |                         | G2583_0341 | 45.23                   | -            |                         |
| IpaH                  | IpaH                | -        |                         | G2583_1452 | 35.5                    | -            |                         |
| PSPTO0836             |                     | -        |                         | G2583_2614 | 32.5                    | E2348_C_2227 | 33.33                   |
| NleG-3                | NleG                | -        |                         | G2583_3207 | 45.69                   | -            |                         |
| Hpa2                  | BapC/Hpa2           | -        |                         | pO55_0014  | 41.41                   | E2348_P1_077 | 41.41                   |
| Ipx53-1               |                     | -        |                         | -          |                         | E2348_C_0568 | 25.89                   |
| NleH                  | NleH                | -        |                         | -          |                         | E2348_C_0718 | -                       |
| Cif                   | Cif                 | -        |                         | -          |                         | E2348_C_0719 | -                       |
| TC0438                |                     | -        |                         | -          |                         | E2348_C_1079 | 27.47                   |
| NleE-2                | NleE                | -        |                         | -          |                         | E2348_C_1080 | 59.38                   |
| NleB                  | NleB                | -        |                         | -          |                         | E2348_C_1081 | -                       |
| EspL5                 | AR                  | -        |                         | -          |                         | E2348_C_1082 | 42.93                   |
| MxiC                  |                     | -        |                         | -          |                         | E2348_C_1530 | 23.6                    |
| IncC                  |                     | -        |                         | -          |                         | E2348_C_2912 | 23.68                   |
| EspG2                 | EspG                | -        |                         | -          |                         | E2348_C_2916 | 42.46                   |
| Ipx53-2               |                     | -        |                         | -          |                         | E2348_C_3003 | 44.36                   |
| BapC                  | BapC/Hpa2           | -        |                         | -          |                         | E2348_P1_012 | 36                      |

<sup>a</sup> Named according to Tobe *et al.* [44]

<sup>b</sup> LRR, leucine-rich repeats; AR, ankyrin repeats; PPR, pentapeptide repeats; SopD-N, SopD N-terminal domain.

<sup>c</sup> Based on the top hit in the blastp result
