# Supplementary material for: Derivation of Escherichia coli O157:H7 from Its O55:H7 Precursor
Source: PubMed Central journal article supplement (PMC2806823; doi:10.1371/journal.pone.0008700), 2010-01-14
Supplement: pone.0008700.s015.pdf [file pone.0008700.s015.pdf]

Table S13. The regulated proteins in the different growth stages

| CB9615     | EDL933 | Gene | Product                                                                              | COG     | Category | Description                                                                 | CB9615 | EDL933 |
|------------|--------|------|--------------------------------------------------------------------------------------|---------|----------|-----------------------------------------------------------------------------|--------|--------|
| G2583_4753 | Z5496  | metF | 5,10-methylenetetrahydrofolate reductase                                             | COG0685 | E        | Amino acid transport and metabolism                                         | down   | down   |
| G2583_0771 | Z0751  | uspG | hypothetical protein                                                                 | COG0589 | T        | Signal transduction mechanisms                                              | down   | down   |
| G2583_1094 | Z1090  | artJ | arginine 3rd transport system periplasmic binding protein                            | COG0834 | ET       | Amino acid transport and metabolism/ Signal transduction mechanisms         | down   | down   |
| G2583_1856 | Z2215  | gadB | glutamate decarboxylase isozyme                                                      | COG0076 | E        | Amino acid transport and metabolism                                         | down   | down   |
| G2583_4253 | Z4930  | gadA | glutamate decarboxylase isozyme                                                      | COG0076 | E        | Amino acid transport and metabolism                                         | down   | down   |
| G2583_4629 | Z5351  | metE | tetrahydropteroyltrimethyltransferase                                                | COG0620 | E        | Amino acid transport and metabolism                                         | down   | down   |
| G2583_1040 | Z1034  | dps  | global regulator, starvation conditions                                              | COG0783 | P        | Inorganic ion transport and metabolism                                      | down   | down   |
| G2583_1845 | Z2228  | osmC | osmotically inducible protein                                                        | COG1764 | O        | Posttranslational modification, protein turnover, chaperones                | down   | down   |
| G2583_2171 | Z2754  | yniA | orf, hypothetical protein                                                            | COG3001 | G        | Carbohydrate transport and metabolism                                       | down   |        |
| G2583_1042 | Z1036  | ompX | outer membrane protein X                                                             | COG3637 | M        | Cell envelope biogenesis, outer membrane                                    | down   |        |
| G2583_1164 | Z1276  | ompF | outer membrane protein 1a (1a;b;F)                                                   | COG3203 | M        | Cell envelope biogenesis, outer membrane                                    | down   |        |
| G2583_1601 | Z2549  | trpC | N-(5-phosphoribosyl)anthranilate isomerase and indole-3-glycerolphosphate synthetase | COG0134 | E        | Amino acid transport and metabolism                                         | down   |        |
| G2583_3175 | Z3886  | clpB | heat shock protein                                                                   | COG0542 | O        | Posttranslational modification, protein turnover, chaperones                | down   |        |
| G2583_3576 | Z4259  | yggE | putative actin                                                                       | COG2968 | S        | Function unknown                                                            | down   |        |
| G2583_0014 | Z0014  | dnaK | chaperone Hsp70; DNA biosynthesis; autoregulated heat shock proteins                 | COG0443 | O        | Posttranslational modification, protein turnover, chaperones                | down   |        |
| G2583_0585 | Z0590  | htpG | chaperone Hsp90, heat shock protein C 62.5                                           | COG0326 | O        | Posttranslational modification, protein turnover, chaperones                | down   |        |
| G2583_3311 | Z3964  | ygaU | orf, hypothetical protein                                                            | COG1652 | S        | Function unknown                                                            | down   |        |
| G2583_3870 | Z4505  | yraL | orf, hypothetical protein                                                            | COG0313 | R        | General function prediction only                                            | down   |        |
| G2583_4200 | Z4871  | nikD | ATP-binding protein of nickel transport system                                       | COG0444 | EP       | Amino acid transport and metabolism/ Inorganic ion transport and metabolism | down   |        |
| G2583_4611 | Z5331  | orf  | orf; conserved hypothetical protein                                                  | COG1912 | S        | Function unknown                                                            | down   |        |
| G2583_4622 | Z5343  | recQ | ATP-dependent DNA helicase                                                           | COG0514 | L        | DNA replication, recombination, and repair                                  | down   |        |
| G2583_4870 | Z5644  | yjbJ | orf, hypothetical protein                                                            | COG3237 | S        | Function unknown                                                            | down   |        |
| G2583_5241 | Z5983  | deoC | 2-deoxyribose-5-phosphate aldolase                                                   | COG0274 | F        | Nucleotide transport and metabolism                                         | down   |        |
| G2583_2417 | Z3059  | hchA | hypothetical protein                                                                 | COG0693 | R        | General function prediction only                                            | down   |        |
| G2583_4715 | Z5455  | yiiM | orf, hypothetical protein                                                            | COG2258 | S        | Function unknown                                                            | down   |        |
| G2583_1751 | Z2335  | uspF | hypothetical protein                                                                 | COG0589 | T        | Signal transduction mechanisms                                              | down   |        |
| G2583_3560 | Z4245  | pepP | proline aminopeptidase P II                                                          | COG0006 | E        | Amino acid transport and metabolism                                         | down   |        |

Table S13. The regulated proteins in the different growth stages

| CB9615     | EDL933 | Gene | Product                                                  | COG     | Category | Description                                                              | CB9615 | EDL933 |
|------------|--------|------|----------------------------------------------------------|---------|----------|--------------------------------------------------------------------------|--------|--------|
| G2583_0531 | Z0522  | yajO | putative NAD(P)H-dependent xylose reductase              | COG0667 | C        | Energy production and conversion                                         | down   |        |
| G2583_0598 | Z0606  | ybaS | putative glutaminase                                     | COG2066 | E        | Amino acid transport and metabolism                                      | down   |        |
| G2583_1108 | Z1105  | poxB | pyruvate oxidase                                         | COG0028 | EH       | Amino acid transport and metabolism/Coenzyme metabolism                  | down   |        |
| G2583_1134 | Z1243  | ycaC | orf, hypothetical protein                                | COG1335 | Q        | Secondary metabolites biosynthesis, transport and catabolism             | down   |        |
| G2583_1238 | Z1423  | wrbA | trp repressor binding protein                            | -       | -        | -                                                                        | down   |        |
| G2583_1599 | Z2551  | trpA | tryptophan synthase, alpha protein                       | COG0159 | E        | Amino acid transport and metabolism                                      | down   |        |
| G2583_2348 | Z2950  | otsB | trehalose-6-phosphate phosphatase, biosynthetic          | COG1877 | G        | Carbohydrate transport and metabolism                                    | down   |        |
| G2583_2807 | Z3526  | elaB | orf, hypothetical protein                                | COG4575 | S        | Function unknown                                                         | down   |        |
| G2583_2986 | Z3720  | talA | transaldolase A                                          | COG0176 | G        | Carbohydrate transport and metabolism                                    | down   |        |
| G2583_2987 | Z3721  | tktB | transketolase 2 isozyme                                  | COG0021 | G        | Carbohydrate transport and metabolism                                    | down   |        |
| G2583_4609 | Z5329  | yigB | putative phosphatase                                     | COG1011 | R        | General function prediction only                                         | down   |        |
| G2583_5260 | Z6004  | arcA | negative response regulator of genes in aerobic pathways | COG0745 | TK       | Signal transduction mechanisms/Transcription                             | down   |        |
| G2583_2831 | Z3555  | yfbU | orf, hypothetical protein                                | COG3013 | S        | Function unknown                                                         | up     | down   |
| G2583_0849 | Z0837  | pgm  | phosphoglucomutase                                       | COG0033 | G        | Carbohydrate transport and metabolism                                    | up     | up     |
| G2583_3939 | Z4577  | gltD | glutamate synthase, small subunit                        | COG0493 | ER       | Amino acid transport and metabolism/ General function prediction only    | up     | up     |
| G2583_4803 | Z5560  | rpoB | RNA polymerase, beta subunit                             | COG0085 | K        | Transcription                                                            | up     | up     |
| G2583_4859 | Z5632  | malE | periplasmic maltose-binding protein                      | COG2182 | G        | Carbohydrate transport and metabolism                                    | up     | up     |
| G2583_0102 | Z0108  | secA | preprotein translocase; secretion protein                | COG0653 | U        | Intracellular trafficking, secretion, and vesicular transport            | up     | up     |
| G2583_3032 | Z3772  | guaB | IMP dehydrogenase                                        | COG0516 | F        | Nucleotide transport and metabolism                                      | up     | up     |
| G2583_3345 | Z3999  | alaS | alanyl-tRNA synthetase                                   | COG0013 | J        | Translation, ribosomal structure and biogenesis                          | up     | up     |
| G2583_0273 | Z0298  | pepD | aminoacyl-histidine dipeptidase (peptidase D)            | COG2195 | E        | Amino acid transport and metabolism                                      | up     | up     |
| G2583_4754 | Z5497  | katG | catalase; hydroperoxidase HPI(I)                         | COG0376 | P        | Inorganic ion transport and metabolism                                   | up     | up     |
| G2583_5250 | Z5993  | yjjK | putative ATP-binding component of ABC transport system   | COG0488 | R        | General function prediction only                                         | up     | up     |
| G2583_0034 | Z0038  | carB | carbamoyl-phosphate synthase large subunit               | COG0458 | EF       | Amino acid transport and metabolism/ Nucleotide transport and metabolism | up     |        |
| G2583_0646 | Z0681  | cysS | cysteine tRNA synthetase                                 | COG0215 | J        | Translation, ribosomal structure and biogenesis                          | up     |        |

Table S13. The regulated proteins in the different growth stages

| CB9615     | EDL933 | Gene | Product                                                                 | COG     | Category | Description                                                  | CB9615 | EDL933 |
|------------|--------|------|-------------------------------------------------------------------------|---------|----------|--------------------------------------------------------------|--------|--------|
| G2583_4525 | Z5227  | glmS | L-glutamine:D-fructose-6-phosphate aminotransferase                     | COG0449 | M        | Cell envelope biogenesis, outer membrane                     | up     |        |
| G2583_0118 | Z0124  | aceE | pyruvate dehydrogenase (decarboxylase component)                        | COG2609 | C        | Energy production and conversion                             | up     |        |
| G2583_0258 | Z0280  | lpcA | phosphoheptose isomerase                                                | COG0279 | G        | Carbohydrate transport and metabolism                        | up     |        |
| G2583_0278 | Z0303  | proB | gamma-glutamate kinase                                                  | COG0263 | E        | Amino acid transport and metabolism                          | up     |        |
| G2583_0835 | Z0821  | asnB | asparagine synthetase B                                                 | COG0367 | E        | Amino acid transport and metabolism                          | up     |        |
| G2583_0841 | Z0827  | glnS | glutamine tRNA synthetase                                               | COG0008 | J        | Translation, ribosomal structure and biogenesis              | up     |        |
| G2583_1351 | Z1730  | fabH | 3-oxoacyl-[acyl-carrier-protein] synthase III                           | COG0332 | I        | Lipid metabolism                                             | up     |        |
| G2583_4670 | Z5406  | glnA | glutamine synthetase                                                    | COG0174 | E        | Amino acid transport and metabolism                          | up     |        |
| G2583_1130 | Z1239  | serS | serine tRNA synthetase; also charges selenocysteine tRNA with serine    | COG0172 | J        | Translation, ribosomal structure and biogenesis              | up     |        |
| G2583_1143 | Z1254  | aroA | 5-enolpyruvylshikimate-3-phosphate synthetase                           | COG0128 | E        | Amino acid transport and metabolism                          | up     |        |
| G2583_2160 | Z2742  | pheT | phenylalanine tRNA synthetase, beta-subunit                             | COG0072 | J        | Translation, ribosomal structure and biogenesis              | up     |        |
| G2583_2194 | Z2780  | astC | acetylornithine delta-aminotransferase                                  | COG4992 | E        | Amino acid transport and metabolism                          | up     |        |
| G2583_2571 | -      | cpsG | Phosphomannomutase CpsG                                                 | COG1109 | G        | Carbohydrate transport and metabolism                        | up     |        |
| G2583_3769 | Z4400  | yqiC | hypothetical protein                                                    | COG2960 | S        | Function unknown                                             | up     |        |
| G2583_3906 | Z4543  | greA | transcription elongation factor: cleaves 3' nucleotide of paused mRNA   | COG0782 | K        | Transcription                                                | up     |        |
| G2583_5062 | Z5843  | mpl  | putative ligase                                                         | COG0773 | M        | Cell envelope biogenesis, outer membrane                     | up     |        |
| G2583_0122 | Z0128  | acnB | aconitate hydratase B                                                   | COG1049 | C        | Energy production and conversion                             | up     |        |
| G2583_0276 | Z0301  | crl  | transcriptional regulator of cryptic csgA gene for curli surface fibers | -       | -        | -                                                            | up     |        |
| G2583_0717 | Z1931  | ompT | outer membrane protein 3b (a), protease VII                             | COG4571 | M        | Cell envelope biogenesis, outer membrane                     | up     |        |
| G2583_0883 | Z0882  | sucC | succinyl-CoA synthetase, beta subunit                                   | COG0045 | C        | Energy production and conversion                             | up     |        |
| G2583_2650 | Z3282  | metG | methionine tRNA synthetase                                              | COG0073 | R        | General function prediction only                             | up     |        |
| G2583_4738 | Z5478  | hslU | heat shock protein hslIVU, ATPase subunit, homologous to chaperones     | COG1220 | O        | Posttranslational modification, protein turnover, chaperones | up     |        |
| G2583_2203 | Z2789  | ynjE | putative thiosulfate sulfur transferase                                 | COG2897 | P        | Inorganic ion transport and metabolism                       | up     |        |
| G2583_3892 | Z4528  | rbfA | ribosome-binding factor A                                               | COG0858 | J        | Translation, ribosomal structure and biogenesis              | up     |        |
| G2583_3901 | Z4538  | glmM | similar to phosphoglucomutases and phosphomannomutases                  | COG1109 | G        | Carbohydrate transport and metabolism                        | up     |        |

Table S13. The regulated proteins in the different growth stages

| CB9615     | EDL933 | Gene | Product                                                                                  | COG     | Category | Description                                                                      | CB9615 | EDL933 |
|------------|--------|------|------------------------------------------------------------------------------------------|---------|----------|----------------------------------------------------------------------------------|--------|--------|
| G2583_4488 | Z5190  | gyrB | DNA gyrase subunit B, type II topoisomerase, ATPase activity                             | COG0187 | L        | DNA replication, recombination, and repair                                       | up     |        |
| G2583_5075 | Z5856  | pyrB | aspartate carbamoyltransferase, catalytic subunit                                        | COG0540 | F        | Nucleotide transport and metabolism                                              | up     |        |
| G2583_0154 | Z0161  | fhuA | outer membrane protein receptor for ferrichrome, colicin M, and phages T1, T5, and phi80 | COG1629 | P        | Inorganic ion transport and metabolism                                           | up     |        |
| G2583_0756 | Z0735  | entC | isochorismate hydroxymutase 2, enterochelin biosynthesis                                 | COG1169 | HQ       | Coenzyme metabolism/Secondary metabolites biosynthesis, transport and catabolism | up     |        |
| G2583_1033 | Z1026  | fiu  | putative outer membrane receptor for iron transport                                      | COG4774 | P        | Inorganic ion transport and metabolism                                           | up     |        |
| G2583_1360 | Z1739  | ycfH | orf, hypothetical protein                                                                | COG0084 | L        | DNA replication, recombination, and repair                                       | up     |        |
| G2583_2207 | Z2793  | gdhA | NADP-specific glutamate dehydrogenase                                                    | COG0334 | E        | Amino acid transport and metabolism                                              | up     |        |
| G2583_2504 | Z3159  | yoeE | putative outer membrane receptor for iron compound or colicin                            | COG1629 | P        | Inorganic ion transport and metabolism                                           | up     |        |
| G2583_2542 | Z3183  | hisC | histidinol-phosphate aminotransferase                                                    | COG0079 | E        | Amino acid transport and metabolism                                              | up     |        |
| G2583_2702 | Z3416  | nfo  | endonuclease IV                                                                          | COG0648 | L        | DNA replication, recombination, and repair                                       | up     |        |
| G2583_2726 | Z3442  | rsuA | 16S pseudouridylate 516 synthase                                                         | COG1187 | J        | Translation, ribosomal structure and biogenesis                                  | up     |        |
| G2583_3954 | Z4593  | degQ | serine endoprotease                                                                      | COG0265 | O        | Posttranslational modification, protein turnover, chaperones                     | up     |        |
| G2583_4234 | Z4910  | chuS | putative heme/hemoglobin transport protein                                               | COG3720 | P        | Inorganic ion transport and metabolism                                           | up     |        |
| G2583_4300 | Z4983  | glyS | glycine tRNA synthetase, beta subunit                                                    | COG0751 | J        | Translation, ribosomal structure and biogenesis                                  | up     |        |
| G2583_4662 | Z5398  | polA | DNA polymerase I                                                                         | COG0258 | L        | DNA replication, recombination, and repair                                       | up     |        |
| G2583_4781 | Z5527  | btuB | outer membrane receptor for transport of vitamin B12, E colicins, and bacteriophage BF23 | COG4206 | H        | Coenzyme metabolism                                                              | up     |        |
| G2583_4878 | Z5652  | tyrB | tyrosine aminotransferase, tyrosine repressible                                          | COG1448 | E        | Amino acid transport and metabolism                                              | up     |        |
| G2583_4998 | Z5778  | miaA | delta(2)-isopentenylpyrophosphate tRNA-adenosine transferase                             | COG0324 | J        | Translation, ribosomal structure and biogenesis                                  | up     |        |
| G2583_5001 | Z5781  | hflK | protease specific for phage lambda cII repressor                                         | COG0330 | O        | Posttranslational modification, protein turnover, chaperones                     | up     |        |
| G2583_5027 | Z5809  | rpsF | 30S ribosomal subunit protein S6                                                         | COG0360 | J        | Translation, ribosomal structure and biogenesis                                  | up     |        |
| G2583_2866 | Z3592  | aroC | chorismate synthase                                                                      | COG0082 | E        | Amino acid transport and metabolism                                              |        | down   |
| G2583_5172 | Z5972  | rsmC | putative enzyme                                                                          | COG2813 | J        | Translation, ribosomal structure and biogenesis                                  |        | down   |

Table S13. The regulated proteins in the different growth stages

| CB9615     | EDL933 | Gene | Product                                                                                    | COG     | Category | Description                                                         | CB9615 | EDL933 |
|------------|--------|------|--------------------------------------------------------------------------------------------|---------|----------|---------------------------------------------------------------------|--------|--------|
| G2583_0921 | Z0925  | gpmA | phosphoglyceromutase 1                                                                     | COG0588 | G        | Carbohydrate transport and metabolism                               |        | down   |
| G2583_3735 | Z4364  | yqhD | putative oxidoreductase                                                                    | COG1979 | C        | Energy production and conversion                                    |        | down   |
| G2583_1010 | Z1001  | moaB | molybdopterin biosynthesis, protein B                                                      | COG0521 | H        | Coenzyme metabolism                                                 |        | down   |
| G2583_2062 | Z2694  | ydhR | orf, hypothetical protein                                                                  | -       | -        | -                                                                   |        | down   |
| G2583_3748 | Z4379  | mdaB | modulator of drug activity B                                                               | COG2249 | R        | General function prediction only                                    |        | down   |
| G2583_4356 | Z5044  | kbl  | 2-amino-3-ketobutyrate CoA ligase (glycine acetyltransferase)                              | COG0156 | H        | Coenzyme metabolism                                                 |        | down   |
| G2583_1107 | Z1104  | ltaE | putative arylsulfatase                                                                     | COG2008 | E        | Amino acid transport and metabolism                                 |        | down   |
| G2583_2008 | Z2617  | ydgA | orf, hypothetical protein                                                                  | COG5339 | S        | Function unknown                                                    |        | down   |
| G2583_2846 | Z3571  | hisJ | histidine-binding periplasmic protein of high-affinity histidine transport system          | COG0834 | ET       | Amino acid transport and metabolism/ Signal transduction mechanisms |        | down   |
| G2583_3749 | Z4380  | ygiN | orf, hypothetical protein                                                                  | COG1359 | S        | Function unknown                                                    |        | down   |
| G2583_4771 | Z5517  | argB | acetylglutamate kinase                                                                     | COG0548 | E        | Amino acid transport and metabolism                                 |        | down   |
| G2583_1153 | Z1264  | kdsB | CTP:CMP-3-deoxy-D-manno-octulosonate transferase                                           | COG1212 | M        | Cell envelope biogenesis, outer membrane                            |        | up     |
| G2583_2541 | Z3182  | hisD | L-histidinal:NAD <sup>+</sup> oxidoreductase; L-histidinol:NAD <sup>+</sup> oxidoreductase | COG0141 | E        | Amino acid transport and metabolism                                 |        | up     |
| G2583_3043 | Z3781  | ndk  | nucleoside diphosphate kinase                                                              | COG0105 | F        | Nucleotide transport and metabolism                                 |        | up     |
| G2583_4134 | Z4797  | asd  | aspartate-semialdehyde dehydrogenase                                                       | COG0136 | E        | Amino acid transport and metabolism                                 |        | up     |
| G2583_0882 | Z0881  | sucB | 2-oxoglutarate dehydrogenase                                                               | COG0508 | C        | Energy production and conversion                                    |        | up     |
| G2583_2693 | Z3405  | mgIB | galactose-binding transport protein; receptor for galactose taxis                          | COG1879 | G        | Carbohydrate transport and metabolism                               |        | up     |
| G2583_0492 | Z0480  | psiF | induced by phosphate starvation                                                            | -       | -        | -                                                                   |        | up     |
| G2583_0642 | Z0677  | purK | phosphoribosylaminoimidazole carboxylase                                                   | COG0026 | F        | Nucleotide transport and metabolism                                 |        | up     |
| G2583_3334 | Z3988  | luxS | orf, hypothetical protein                                                                  | COG1854 | T        | Signal transduction mechanisms                                      |        | up     |
| G2583_3031 | Z3771  | guaA | GMP synthetase (glutamine-hydrolyzing)                                                     | COG0518 | F        | Nucleotide transport and metabolism                                 |        | up     |
| G2583_4599 | Z5317  | hemX | uroporphyrinogen III methylase                                                             | COG2959 | H        | Coenzyme metabolism                                                 |        | up     |
| G2583_4966 | Z5744  | aspA | aspartate ammonia-lyase (aspartase)                                                        | COG1027 | E        | Amino acid transport and metabolism                                 |        | up     |
| G2583_1911 | Z2083  | -    | unknown protein encoded within CP-933O                                                     | -       | -        | -                                                                   |        | up     |
| G2583_0188 | Z0197  | accA | acetylCoA carboxylase, carboxytransferase component, alpha subunit                         | COG0825 | I        | Lipid metabolism                                                    |        | up     |
| G2583_0279 | Z0304  | proA | gamma-glutamylphosphate reductase                                                          | COG0014 | E        | Amino acid transport and metabolism                                 |        | up     |
| G2583_1321 | Z1699  | pyrC | dihydro-orotase                                                                            | COG0418 | F        | Nucleotide transport and metabolism                                 |        | up     |
| G2583_1628 | Z2514  | rnb  | RNase II, mRNA degradation                                                                 | COG4776 | K        | Transcription                                                       |        | up     |

Table S13. The regulated proteins in the different growth stages

| CB9615     | EDL933 | Gene | Product                                                                | COG     | Category | Description                                                                        | CB9615 | EDL933 |
|------------|--------|------|------------------------------------------------------------------------|---------|----------|------------------------------------------------------------------------------------|--------|--------|
| G2583_1777 | Z2306  | aldA | aldehyde dehydrogenase, NAD-linked                                     | COG1012 | C        | Energy production and conversion                                                   |        | up     |
| G2583_2049 | Z2676  | grxD | orf, hypothetical protein                                              | COG0278 | O        | Posttranslational modification, protein turnover, chaperones                       |        | up     |
| G2583_2328 | Z2929  | argS | arginine tRNA synthetase                                               | COG0018 | J        | Translation, ribosomal structure and biogenesis                                    |        | up     |
| G2583_3447 | Z4111  | queF | orf, hypothetical protein                                              | COG0780 | R        | General function prediction only                                                   |        | up     |
| G2583_3557 | Z4242  | gcvT | aminomethyltransferase of glycine cleavage system                      | COG0404 | E        | Amino acid transport and metabolism                                                |        | up     |
| G2583_3950 | Z4588  | rpsI | 30S ribosomal subunit protein S9                                       | COG0103 | J        | Translation, ribosomal structure and biogenesis                                    |        | up     |
| G2583_4262 | Z4940  | kdgK | ketodeoxygluconokinase                                                 | COG0524 | G        | Carbohydrate transport and metabolism                                              |        | up     |
| G2583_5056 | Z5837  | ppa  | inorganic pyrophosphatase                                              | COG0221 | C        | Energy production and conversion                                                   |        | up     |
| G2583_5235 | Z5976  | prfC | peptide chain release factor RF-3                                      | COG4108 | J        | Translation, ribosomal structure and biogenesis                                    |        | up     |
| -          | Z2386  | -    | unknown protein encoded within prophage CP-933R                        | -       | -        | -                                                                                  |        | up     |
| G2583_0058 | Z0063  | imp  | organic solvent tolerance                                              | COG1452 | M        | Cell envelope biogenesis, outer membrane                                           |        | up     |
| G2583_0138 | Z0145  | panB | 3-methyl-2-oxobutanoate hydroxymethyltransferase                       | COG0413 | H        | Coenzyme metabolism                                                                |        | up     |
| G2583_1162 | Z1274  | ycbL | orf, hypothetical protein                                              | COG0491 | R        | General function prediction only                                                   |        | up     |
| G2583_1842 | Z2231  | maeA | NAD-linked malate dehydrogenase (malic enzyme)                         | COG0281 | C        | Energy production and conversion                                                   |        | up     |
| G2583_2536 | Z3178  | yeeZ | putative enzyme of sugar metabolism                                    | COG0451 | MG       | Cell envelope biogenesis, outer membrane/<br>Carbohydrate transport and metabolism |        | up     |
| G2583_2546 | Z3187  | hisF | imidazole glycerol phosphate synthase subunit in heterodimer with HisH | COG0107 | E        | Amino acid transport and metabolism                                                |        | up     |
| G2583_3331 | Z3985  | mprA | regulator of plasmid mcrB operon                                       | COG1846 | K        | Transcription                                                                      |        | up     |
| G2583_3336 | Z3989  | gshA | gamma-glutamate-cysteine ligase                                        | COG2918 | H        | Coenzyme metabolism                                                                |        | up     |
| G2583_4884 | Z5658  | ssb  | ssDNA-binding protein                                                  | COG0629 | L        | DNA replication, recombination, and repair                                         |        | up     |
| G2583_5030 | Z5812  | rplI | 50S ribosomal subunit protein L9                                       | COG0359 | J        | Translation, ribosomal structure and biogenesis                                    |        | up     |
