# Supplementary material for: Derivation of Escherichia coli O157:H7 from Its O55:H7 Precursor
Source: PubMed Central journal article supplement (PMC2806823; doi:10.1371/journal.pone.0008700), 2010-01-14
Supplement: pone.0008700.s016.pdf [file pone.0008700.s016.pdf]

| O55 and O157 Details |                           |                          |                           |       | Outgroup Strain Details <sup>g</sup> |                                 |                            |          |      |    |           |         |       |         |          |     |      |        |     |         | Note <sup>f</sup> |       |         |      |      |         |           |         |          |          |           |
|----------------------|---------------------------|--------------------------|---------------------------|-------|--------------------------------------|---------------------------------|----------------------------|----------|------|----|-----------|---------|-------|---------|----------|-----|------|--------|-----|---------|-------------------|-------|---------|------|------|---------|-----------|---------|----------|----------|-----------|
| event                | CB9615 block <sup>a</sup> | Sakai block <sup>a</sup> | EDL933 block <sup>a</sup> | type  | Event Lineage <sup>b</sup>           | Inferred ancestral <sup>c</sup> | Support level <sup>d</sup> | D1 Sd197 | K-12 | HS | ATCC 8739 | UIMN026 | IAI39 | SMS 3-5 | E2348/69 | 536 | ED1a | CFT073 | S88 | APEC O1 |                   | UTI89 | E24377A | IAI1 | SE11 | F5 8401 | F2a 2457T | F2a 301 | SS Ss046 | B4 S6227 | B18 BS512 |
| 179                  | -                         | +                        | +                         | del   | CB9615                               | +                               | ++++                       | +        | +    | +  | +         | +       | +     | +       | +        | +   | +    | +      | +   | +       | +                 | +     | +       | +    | +    | +       | +         | +       | +        | +        | +         |
| 180                  | -                         | +                        | +                         | ins   | O157                                 | -                               | +++                        | -        | -    | -  | -         | -       | -     | -       | -        | -   | -    | -      | -   | -       | -                 | -     | -       | -    | -    | -       | -         | -       | -        | -        | -         |
| 181                  | +                         | -                        | -                         | ins   | CB9615                               | -                               | ++++                       | -        | -    | -  | -         | -       | -     | -       | -        | -   | -    | -      | -   | -       | -                 | -     | -       | -    | -    | -       | -         | -       | -        | -        | -         |
| 182                  | -                         | -                        | -                         | ins   | EDL933                               | -                               | ++                         | -        | +    | +  | +         | -       | -     | -       | -        | -   | -    | -      | -   | -       | -                 | -     | -       | -    | -    | -       | -         | -       | -        | -        | -         |
| 183                  | +                         | -                        | +                         | del   | Sakai                                | +                               | +++                        | +        | +    | +  | -         | -       | -     | -       | -        | -   | -    | -      | -   | -       | -                 | -     | -       | -    | -    | -       | -         | -       | -        | -        | -         |
| 184                  | -                         | +                        | +                         | ins   | O157                                 | -                               | +                          | -        | -    | -  | -         | -       | -     | -       | -        | -   | -    | -      | -   | -       | -                 | -     | -       | -    | -    | -       | -         | -       | -        | -        | -         |
| 185                  | +                         | -                        | -                         | del   | O157                                 | +                               | +                          | -        | -    | -  | -         | -       | -     | -       | -        | -   | -    | -      | -   | -       | -                 | -     | -       | -    | -    | -       | -         | -       | -        | -        | -         |
| 186                  | +                         | -                        | -                         | indel | O55/O157                             | ?                               | +/-                        | -        | -    | -  | -         | -       | -     | -       | -        | -   | -    | -      | -   | -       | -                 | -     | -       | -    | -    | -       | -         | -       | -        | -        | -         |
| 187                  | -                         | +                        | +                         | del   | CB9615                               | +                               | ++++                       | +        | +    | +  | +         | +       | +     | +       | +        | +   | +    | +      | +   | +       | +                 | +     | +       | +    | +    | +       | +         | +       | +        | +        | +         |
| 188                  | +                         | -                        | -                         | del   | O157                                 | +                               | ++++                       | +        | +    | +  | +         | +       | +     | +       | +        | +   | +    | +      | +   | +       | +                 | +     | +       | +    | +    | +       | +         | +       | +        | +        | +         |
| 189                  | -                         | +                        | -                         | ins   | Sakai                                | -                               | +++                        | -        | -    | -  | -         | -       | -     | -       | -        | -   | -    | -      | -   | -       | -                 | -     | -       | -    | -    | -       | -         | -       | -        | -        | -         |
| 190                  | -                         | +                        | +                         | del   | CB9615                               | +                               | ++++                       | +        | +    | +  | +         | +       | +     | +       | +        | +   | +    | +      | +   | +       | +                 | +     | +       | +    | +    | +       | +         | +       | +        | +        | +         |
| 191                  | +                         | -                        | -                         | ins   | CB9615                               | -                               | ++                         | -        | -    | -  | -         | -       | -     | -       | -        | -   | -    | -      | -   | -       | -                 | -     | -       | -    | -    | -       | -         | -       | -        | -        | -         |
| 192                  | +                         | -                        | -                         | ins   | CB9615                               | -                               | ++                         | -        | +    | +  | +         | -       | -     | -       | -        | -   | -    | -      | -   | -       | -                 | -     | -       | -    | -    | -       | -         | -       | -        | -        | -         |
| 193                  | -                         | +                        | -                         | ins   | Sakai                                | -                               | ++++                       | -        | -    | -  | -         | -       | -     | -       | -        | -   | -    | -      | -   | -       | -                 | -     | -       | -    | -    | -       | -         | -       | -        | -        | -         |
| 194                  | -                         | +                        | +                         | ins   | O157                                 | -                               | +++                        | -        | +    | -  | -         | -       | -     | -       | -        | -   | -    | -      | -   | -       | -                 | -     | -       | -    | -    | -       | -         | -       | -        | -        | -         |
| 195                  | -                         | +                        | +                         | del   | CB9615                               | +                               | +                          | +        | +    | +  | +         | +       | +     | +       | +        | +   | +    | +      | +   | +       | +                 | +     | +       | +    | +    | +       | +         | +       | +        | +        | +         |
| 196                  | +                         | -                        | -                         | ins   | CB9615                               | -                               | ++++                       | -        | -    | -  | -         | -       | -     | -       | -        | -   | -    | -      | -   | -       | -                 | -     | -       | -    | -    | -       | -         | -       | -        | -        | -         |
| 197                  | -                         | +                        | +                         | ins   | O157                                 | -                               | ++++                       | -        | -    | -  | -         | -       | -     | -       | -        | -   | -    | -      | -   | -       | -                 | -     | -       | -    | -    | -       | -         | -       | -        | -        | -         |
| 198                  | -                         | +                        | +                         | ins   | O157                                 | -                               | +                          | -        | -    | -  | -         | -       | -     | -       | -        | -   | -    | -      | -   | -       | -                 | -     | -       | -    | -    | -       | -         | -       | -        | -        | -         |
| 199                  | +                         | -                        | -                         | ins   | CB9615                               | -                               | +                          | -        | -    | -  | -         | -       | -     | -       | -        | -   | -    | -      | -   | -       | -                 | -     | -       | -    | -    | -       | -         | -       | -        | -        | -         |
| 200                  | -                         | +                        | +                         | del   | CB9615                               | +                               | ++++                       | +        | +    | +  | +         | +       | +     | +       | +        | +   | +    | +      | +   | +       | +                 | +     | +       | +    | +    | +       | +         | +       | +        | +        | +         |
| 201                  | +                         | -                        | -                         | del   | O157                                 | +                               | ++++                       | +        | +    | +  | +         | +       | +     | +       | +        | +   | +    | +      | +   | +       | +                 | +     | +       | +    | +    | +       | +         | +       | +        | +        | +         |
| 202                  | +                         | -                        | -                         | ins   | CB9615                               | -                               | ++++                       | -        | -    | -  | -         | -       | -     | -       | -        | -   | -    | -      | -   | -       | -                 | -     | -       | -    | -    | -       | -         | -       | -        | -        | -         |

<sup>a</sup> "+" indicates the block present, "-" indicates the block absent

<sup>b</sup> O157: allocated to the lineage to the ancestor of EDL933 and Sakai; Sakai/EDL933: allocated to the divergence between Sakai and EDL933 (strain not specified); O55/O157: allocated to the divergence between O55 and O157 lineages (lineage not specified).

<sup>c</sup> presence or absence of indel block in O55/O157 ancestor as inferred from outgroup analysis.

<sup>d</sup> Level of support for allocation of indel blocks as given in previous column

++++ agreement is high - 8 or more outgroup strains with expected type and at most 1 with the opposite, and D1 Sd197 agrees or site not present

+++ agreement good - 4 or more outgroup strains with expected type and at most 1 with the opposite, and D1 Sd197 agrees or site not present

++ agreement in D1 Sd197 regardless of situation with other outgroup strains

+ no conflict but very limited support as either the block and nearby sequence absent in D1 Sd197, and/or outgroup support less than given above

+/- no conflict but no support (the block and its nearby sequence not present in any outgroup OR both alternative lineages supported equally).

- not independent indel as in O-antigen related recombination event

<sup>e</sup> +/- indicates presence or absence of the block. Blank means site not present.

<sup>f</sup> Special reasons affecting allocation: "O antigen" means within major O-antigen related recombination; "part of phage" means within a phage that is inserted
