# Supplementary material for: Derivation of Escherichia coli O157:H7 from Its O55:H7 Precursor
Source: PLoS One. 2010 Jan 14;5(1):e8700. doi: 10.1371/journal.pone.0008700 (PMC2806823; doi:10.1371/journal.pone.0008700)
Supplement: Table S3 — Virtual outgroup analysis of mutations in the CB9651, Sakai, and EDL933 genomes. The mutational and large indel differences between the CB9651, Sakai, and EDL933 genomes were analyzed using the virtual outgroup approach, and the mutations or indels allocated to the CB9651, O157, Sakai, or EDL933 lineages. The 23 genomes used for the analysis are shown, with details of the base or bases present in both outgroup genomes and genomes under analysis, and also the final allocation and a measure of support level for that allocation. (0.21 MB PDF) [file pone.0008700.s005.pdf]

Table S3. Allocation of mutational snps to lineages by virtual outgroup analysis

| O55 and O157 genome site details |                          |                         |                         |                          |                          |                   |                                      |                                         |                            | Outgroup Strain Details <sup>9</sup> |      |    |           |        |       |         |          |     |      |        |     |         |       |         |     |      |         |           |         |          |          |           |
|----------------------------------|--------------------------|-------------------------|-------------------------|--------------------------|--------------------------|-------------------|--------------------------------------|-----------------------------------------|----------------------------|--------------------------------------|------|----|-----------|--------|-------|---------|----------|-----|------|--------|-----|---------|-------|---------|-----|------|---------|-----------|---------|----------|----------|-----------|
| CB9615 base <sup>a</sup>         | CB9615 Site <sup>b</sup> | Sakai base <sup>a</sup> | Sakai Site <sup>b</sup> | EDL933 base <sup>a</sup> | EDL933 Site <sup>b</sup> | type <sup>c</sup> | Inferred ancestral base <sup>d</sup> | Lineage inferred to mutate <sup>e</sup> | Support level <sup>f</sup> | D1 Ss197                             | K-12 | HS | ATCC 8739 | UMN026 | IAI39 | SMS 3-5 | E2348/69 | 536 | ED1a | CFT073 | S88 | APEC O1 | UTI89 | E24377A | IA1 | SE11 | F5 8401 | F2a 2457T | F2a 301 | SS Ss046 | B4 Sb227 | B18 BS512 |
| t                                | 68                       | a                       | 68                      | a                        | 68                       | i                 | a                                    | CB9615                                  | ++++                       | a                                    | a    | a  | a         | a      | a     | a       | a        | a   | a    | a      | a   | a       | a     | a       | a   | a    | a       | a         | a       | a        | a        |           |
| -                                | 229                      | c                       | 230                     | c                        | 230                      | ins               | -                                    | O157                                    | ++++                       | -                                    | -    | -  | -         | -      | -     | -       | -        | -   | -    | -      | -   | -       | -     | -       | -   | -    | -       | -         | -       | -        | -        |           |
| a                                | 1772                     | g                       | 1790                    | g                        | 1790                     | s                 | g                                    | CB9615                                  | ++++                       | g                                    | g    | g  | g         | g      | g     | g       | g        | g   | g    | g      | g   | g       | g     | g       | g   | g    | g       | g         | g       | g        | g        |           |
| g                                | 3117                     | t                       | 3135                    | t                        | 3135                     | s                 | g                                    | O157                                    | ++++                       | g                                    | g    | g  | g         | g      | g     | g       | g        | g   | g    | g      | g   | g       | g     | g       | g   | g    | g       | g         | g       | g        | g        |           |
| c                                | 3160                     | a                       | 3178                    | a                        | 3178                     | ns                | a                                    | CB9615                                  | ++++                       | a                                    | a    | a  | a         | a      | a     | a       | a        | a   | a    | a      | a   | a       | a     | a       | a   | a    | a       | a         | a       | a        | a        |           |
| t                                | 11664                    | g                       | 11682                   | g                        | 11682                    | ns                | t                                    | O157                                    | ++++                       | t                                    | t    | t  | t         | t      | t     | t       | t        | t   | t    | t      | t   | t       | t     | t       | t   | t    | t       | t         | t       | t        | t        |           |
| t                                | 13083                    | c                       | 13101                   | c                        | 13101                    | s                 | c                                    | CB9615                                  | ++++                       | c                                    | c    | c  | c         | c      | c     | c       | c        | c   | c    | c      | c   | c       | c     | c       | c   | c    | c       | c         | c       | c        | c        |           |
| t                                | 15216                    | c                       | 15234                   | c                        | 15234                    | s                 | c                                    | CB9615                                  | ++++                       | c                                    | c    | c  | c         | c      | c     | c       | c        | c   | c    | c      | c   | c       | c     | c       | c   | c    | c       | c         | c       | c        | c        |           |
| g                                | 15594                    | c                       | 15612                   | c                        | 15612                    | ns                | c                                    | CB9615                                  | ++++                       | c                                    | c    | c  | c         | c      | c     | c       | c        | c   | c    | c      | c   | c       | c     | c       | c   | c    | c       | c         | c       | c        | c        |           |
| a                                | 15595                    | t                       | 15613                   | t                        | 15613                    | ns                | t                                    | CB9615                                  | ++++                       | t                                    | t    | t  | t         | t      | t     | t       | t        | t   | t    | t      | t   | t       | t     | t       | t   | t    | t       | t         | t       | t        | t        |           |
| a                                | 16562                    | g                       | 16580                   | g                        | 16580                    | ns                | g                                    | CB9615                                  | ++++                       | g                                    | g    | g  | g         | g      | g     | g       | g        | g   | g    | g      | g   | g       | g     | g       | g   | g    | g       | g         | g       | g        | g        | g         |
| c                                | 17595                    | t                       | 17613                   | t                        | 17613                    | s                 | c                                    | O157                                    | ++++                       | c                                    | c    | c  | c         | c      | c     | c       | c        | c   | c    | c      | c   | c       | c     | c       | c   | c    | c       | c         | c       | c        | c        |           |
| c                                | 17675                    | t                       | 17693                   | t                        | 17693                    | ns                | c                                    | O157                                    | ++++                       | c                                    | c    | c  | c         | c      | c     | c       | c        | c   | c    | c      | c   | c       | c     | c       | c   | c    | c       | c         | c       | c        | c        |           |
| c                                | 18693                    | a                       | 18711                   | a                        | 18711                    | ns                | c                                    | O157                                    | ++++                       | c                                    | c    | c  | c         | c      | c     | c       | c        | c   | c    | c      | c   | c       | c     | c       | c   | c    | c       | c         | c       | c        | c        |           |
| g                                | 18853                    | -                       | 18870                   | g                        | 18871                    | del               | g                                    | Sakai                                   | ++++                       | g                                    | g    | g  | g         | g      | g     | g       | g        | g   | g    | g      | g   | g       | g     | g       | g   | g    | g       | g         | g       | g        | g        |           |
| -                                | 18976                    | t                       | 18994                   | t                        | 18995                    | ins               | -                                    | O157                                    | +++                        | -                                    | -    | -  | -         | -      | -     | -       | -        | -   | -    | -      | -   | -       | -     | -       | -   | -    | -       | -         | -       | -        | -        |           |
| a                                | 23590                    | g                       | 23608                   | g                        | 23609                    | s                 | a                                    | O157                                    | +++                        | a                                    | a    | a  | a         | a      | a     | a       | a        | a   | a    | a      | a   | a       | a     | a       | a   | a    | a       | a         | a       | a        | a        |           |
| g                                | 24215                    | a                       | 24233                   | a                        | 24234                    | ns                | a                                    | CB9615                                  | ++++                       | a                                    | a    | a  | a         | a      | a     | a       | a        | a   | a    | a      | a   | a       | a     | a       | a   | a    | a       | a         | a       | a        | a        |           |
| g                                | 24797                    | a                       | 24815                   | a                        | 24816                    | i                 | a                                    | CB9615                                  | ++++                       | a                                    | a    | a  | a         | a      | a     | a       | a        | a   | a    | a      | a   | a       | a     | a       | a   | a    | a       | a         | a       | a        | a        |           |
| a                                | 24966                    | c                       | 24984                   | c                        | 24985                    | i                 | c                                    | CB9615                                  | ++++                       | c                                    | c    | c  | c         |        |       |         |          |     |      |        |     |         |       |         |     |      |         |           |         |          |          |           |



[illegible]







Table S3. Allocation of mutational snps to lineages by virtual outgroup analysis

| O55 and O157 genome site details |                          |                         |                         |                          |                          |                   |                                      | Outgroup Strain Details <sup>9</sup>    |                            |          |      |    |           |        |       |         |          |     |      |        |     |         |       |      |      |         |           |         |          |          |           |
|----------------------------------|--------------------------|-------------------------|-------------------------|--------------------------|--------------------------|-------------------|--------------------------------------|-----------------------------------------|----------------------------|----------|------|----|-----------|--------|-------|---------|----------|-----|------|--------|-----|---------|-------|------|------|---------|-----------|---------|----------|----------|-----------|
| CB9615 base <sup>a</sup>         | CB9615 Site <sup>b</sup> | Sakai base <sup>a</sup> | Sakai Site <sup>b</sup> | EDL933 base <sup>a</sup> | EDL933 Site <sup>b</sup> | type <sup>c</sup> | Inferred ancestral base <sup>d</sup> | Lineage inferred to mutate <sup>e</sup> | Support level <sup>f</sup> | D1 Sd197 | K-12 | HS | ATCC 8739 | UMN026 | IAI39 | SMS 3-5 | E2348/69 | 536 | ED1a | CFT073 | S88 | APEC O1 | UTI89 | IAI1 | SE11 | F5 8401 | F2a 2457T | F2a 301 | SS Ss046 | B4 Sh227 | B18 BS512 |
| c                                | 631837                   | t                       | 591849                  | t                        | 591852                   | i                 | c                                    | O157                                    | ++                         | c        |      |    |           | c      |       |         |          |     |      |        |     |         |       |      |      |         |           |         |          |          |           |
| c                                | 631945                   | t                       | 591957                  | t                        | 591960                   | i                 | c                                    | O157                                    | ++                         | c        |      |    |           | c      |       |         |          |     |      |        |     |         |       |      |      |         |           |         |          |          |           |
| a                                | 632912                   | g                       | 592924                  | g                        | 592927                   | i                 | g                                    | CB9615                                  | ++                         | g        |      |    |           | g      |       |         |          |     |      |        |     |         |       |      |      |         |           |         |          |          |           |
| t                                | 633466                   | g                       | 593478                  | g                        | 593481                   | i                 | t                                    | O157                                    | ++                         | t        |      |    |           | t      |       |         |          |     |      |        |     |         |       |      |      |         |           |         |          |          |           |
| c                                | 635889                   | t                       | 595901                  | t                        | 595904                   | i                 | c                                    | O157                                    | ++                         | c        |      |    |           | c      |       |         |          |     |      |        |     |         |       |      |      |         |           |         |          |          |           |
| g                                | 638274                   | a                       | 598277                  | a                        | 597971                   | ns                | g                                    | O157                                    | ++                         | g        |      |    |           | g      |       |         |          |     |      |        |     |         |       |      |      |         |           |         |          |          |           |
| c                                | 639084                   | c                       | 599087                  | t                        | 598781                   | ns                | c                                    | EDL933                                  | +                          |          |      |    |           | c      |       |         |          |     |      |        |     |         |       |      |      |         |           |         |          |          |           |
| a                                | 640472                   | t                       | 600475                  | t                        | 600169                   | ns                | a                                    | O157                                    | ++                         | a        |      |    |           | a      |       |         |          |     |      |        |     |         |       |      |      |         |           |         |          |          |           |
| t                                | 640746                   | g                       | 600749                  | g                        | 600443                   | ns                | t                                    | O157                                    | ++                         | t        |      |    |           | t      |       |         |          |     |      |        |     |         |       |      |      |         |           |         |          |          |           |
| c                                | 640777                   | t                       | 600780                  | t                        | 600474                   | s                 | t                                    | CB9615                                  | ++                         | t        |      |    |           | t      |       |         |          |     |      |        |     |         |       |      |      |         |           |         |          |          |           |
| t                                | 643932                   | c                       | 603935                  | c                        | 603629                   | ns                | c                                    | CB9615                                  | ++                         | c        |      |    |           | c      |       |         |          |     |      |        |     |         |       |      |      |         |           |         |          |          |           |
| a                                | 647451                   | g                       | 607454                  | g                        | 607148                   | i                 | g                                    | CB9615                                  | ++++                       | g        |      |    |           | g      | g     | g       | g        |     |      |        | g   | g       | g     | g    | g    | g       | g         | g       | g        | g        |           |
| g                                | 653488                   | a                       | 613491                  | a                        | 613185                   | s                 | g                                    | O157                                    | ++++                       | g        | g    | g  | g         | g      |       | g       | g        | g   | g    | g      | g   | g       | g     | g    | g    | a       | g         | g       | g        | g        |           |
| g                                | 655320                   | t                       | 615323                  | t                        | 615017                   | ns                | g                                    | O157                                    | ++++                       | g        | g    | g  | g         | g      |       | g       | g        | g   | g    | g      | g   | g       | g     | g    | g    | g       | g         | g       | g        | g        |           |
| a                                | 656759                   | g                       | 616762                  | g                        | 616456                   | i                 | a                                    | O157                                    | ++++                       |          | a    |    |           |        |       |         |          |     |      |        |     |         |       |      | a    | a       | a         | a       | a        | a        |           |
| t                                | 657107                   | c                       | 617110                  | c                        | 616804                   | nc                | c                                    | CB9615                                  | ++++                       | c        | c    | t  | c         |        |       |         |          |     |      |        |     |         |       | c    | c    | c       | c         | c       | c        | c        |           |
| c                                | 657395                   | t                       | 617398                  | t                        | 617092                   | nc                | t                                    | CB9615                                  | ++                         | t        | c    | c  | c         |        |       |         |          |     |      |        |     |         | c     | c    | c    | -       |           |         | c        | c        | c         |
| g                                | 657780                   | -                       | 617782                  | -                        | 617476                   | ins               | -                                    | CB9615                                  | ++++                       | -        | -    | -  | -         |        |       |         |          |     |      |        |     |         | -     | -    | -    |         |           |         | -        | -        | -         |
| g                                | 658211                   | a                       | 618213                  | a                        | 617907                   | nc                | g                                    | O157                                    | ++++                       | c        | g    | g  | g         |        |       |         |          |     |      |        |     |         | g     | g    | g    | g       | g         | g       | g        | g        | g         |
| t                                | 658750                   | c                       | 618752                  | c                        | 618446                   | nc                | c                                    | CB9615                                  | ++++                       | c        | c    | g  | c         | c      |       |         |          |     |      |        |     |         | c     | g    | c    | c       | c         | c       | c        | c        | c         |
| t                                | 659704                   | t                       | 619706                  | c                        | 619400                   | nc                | c                                    | EDL933                                  | -                          | c        | c    | c  | c         |        |       |         |          |     |      |        |     |         | c     | c    | c    | c       | c         | c       | c        | c        | c         |
| t                                | 661509                   | g                       | 621511                  | g                        |                          |                   |                                      |                                         |                            |          |      |    |           |        |       |         |          |     |      |        |     |         |       |      |      |         |           |         |          |          |           |









Table S3. Allocation of mutational snps to lineages by virtual outgroup analysis

[illegible]













































| O55 and O157 genome site details |                          |                          |                         |                         |                          |                          |                   |                                      |                                         | Outgroup Strain Details <sup>9</sup> |          |      |    |           |        |       |         |          |     |      |        |     |         |       |         |      |      |         |           |         |          |          |           |
|----------------------------------|--------------------------|--------------------------|-------------------------|-------------------------|--------------------------|--------------------------|-------------------|--------------------------------------|-----------------------------------------|--------------------------------------|----------|------|----|-----------|--------|-------|---------|----------|-----|------|--------|-----|---------|-------|---------|------|------|---------|-----------|---------|----------|----------|-----------|
|                                  | CB9615 base <sup>a</sup> | CB9615 Site <sup>b</sup> | Sakai base <sup>a</sup> | Sakai Site <sup>b</sup> | EDL933 base <sup>a</sup> | EDL933 Site <sup>b</sup> | type <sup>c</sup> | Inferred ancestral base <sup>d</sup> | Lineage inferred to mutate <sup>e</sup> | Support level <sup>f</sup>           | D1 Ss197 | K-12 | HS | ATCC 8739 | UMN026 | IAI39 | SMS 3-5 | E2348/69 | 536 | ED1a | CFT073 | S88 | APEC O1 | UTI89 | E24377A | IAI1 | SE11 | F5 8401 | F2a 2457T | F2a 301 | SS Ss046 | B4 Ss227 | B18 BS512 |
| c                                | 3823768                  | t                        | 3934014                 | t                       | 4001329                  | ns                       | c                 | O157                                 | ++++                                    | c                                    | c        | c    | c  | c         | c      | c     | c       | c        | c   | c    | c      | c   | c       | c     | c       | c    | c    | c       | c         | c       | c        | c        | c         |
| a                                | 3825647                  | g                        | 3935893                 | g                       | 4003208                  | ns                       | g                 | CB9615                               | ++++                                    | g                                    | g        | g    | g  | g         | g      | g     | g       | g        | g   | g    | g      | g   | g       | g     | g       | g    | g    | g       | g         | g       | g        | g        | g         |
| t                                | 3825951                  | a                        | 3936197                 | a                       | 4003512                  | ns                       | t                 | O157                                 | ++++                                    | t                                    | t        | t    | t  | t         | t      | t     | t       | t        | t   | t    | t      | t   | t       | t     | t       | t    | t    | t       | t         | t       | t        | t        | t         |
| g                                | 3827347                  | a                        | 3937593                 | a                       | 4004908                  | ns                       | g                 | O157                                 | ++++                                    | g                                    | g        | g    | g  | g         | g      | g     | g       | g        | g   | g    | g      | g   | g       | g     | g       | g    | g    | g       | g         | g       | g        | g        | g         |
| a                                | 3827899                  | g                        | 3938145                 | g                       | 4005460                  | ns                       | g                 | CB9615                               | ++++                                    | g                                    | g        | g    | g  | g         | g      | g     | g       | g        | g   | g    | g      | g   | g       | g     | g       | g    | g    | g       | g         | g       | g        | g        | g         |
| g                                | 3828353                  | a                        | 3938599                 | a                       | 4005914                  | ns                       | g                 | O157                                 | ++++                                    | g                                    | g        | g    | g  | g         | g      | g     | g       | g        | g   | g    | g      | g   | g       | g     | g       | g    | g    | g       | g         | g       | g        | g        | g         |
| a                                | 3829522                  | c                        | 3939768                 | c                       | 4007083                  | s                        | c                 | CB9615                               | ++++                                    | c                                    | c        | c    | c  | c         | t      | c     | c       | c        | c   | t    | c      | c   | c       | c     | c       | c    | c    | c       | c         | c       | c        | c        | c         |
| g                                | 3831923                  | a                        | 3942169                 | a                       | 4009484                  | ns                       | g                 | O157                                 | ++++                                    | g                                    | g        | g    | g  | g         | g      | g     | g       | g        | g   | g    | g      | g   | g       | g     | g       | g    | g    | g       | g         | g       | g        | g        | g         |
| g                                | 3832507                  | a                        | 3942753                 | a                       | 4010068                  | i                        | g                 | O157                                 | ++++                                    | g                                    | g        | g    | g  | g         | g      | g     | g       | g        | g   | g    | g      | g   | g       | g     | g       | g    | g    | g       | g         | g       | g        | g        | g         |
| t                                | 3834606                  | a                        | 3944852                 | a                       | 4012167                  | i                        | a                 | CB9615                               | ++++                                    | a                                    | a        | a    | a  | a         | a      | a     | a       | a        | a   | a    | a      | a   | a       | a     | a       | a    | a    | a       | a         | a       | a        | a        | a         |
| t                                | 3839059                  | a                        | 3949305                 | a                       | 4016620                  | ns                       | t                 | O157                                 | ++++                                    | t                                    | t        | t    | t  | t         | t      | t     | t       | t        | t   | t    | t      | t   | t       | t     | t       | t    | t    | t       | t         | t       | t        | t        | t         |
| c                                | 3844613                  | t                        | 3954859                 | t                       | 4022174                  | ns                       | c                 | O157                                 | ++++                                    | c                                    | c        | c    | c  | c         | c      | c     | c       | c        | c   | c    | c      | c   | c       | c     | c       | c    | c    | c       | c         | c       | c        | c        | c         |
| c                                | 3846017                  | t                        | 3956263                 | t                       | 4023578                  | i                        | t                 | CB9615                               | ++                                      | t                                    | t        | t    | t  | t         | t      | t     | t       | t        | t   | t    | t      | t   | t       | t     | t       | t    | t    | t       | t         | t       | t        | t        | t         |
| g                                | 3846589                  | a                        | 3956835                 | a                       | 4024150                  | ns                       | g                 | O157                                 | ++++                                    | g                                    | g        | g    | g  | g         | g      | g     | g       | g        | g   | g    | g      | g   | g       | g     | g       | g    | g    | g       | g         | g       | g        | g        | g         |
| g                                | 3847542                  | t                        | 3957788                 | g                       | 4025103                  | ns                       | g                 | Sakai                                | ++++                                    | g                                    | g        | g    | g  | g         | g      | g     | g       | g        | g   | g    | g      | g   | g       | g     | g       | g    | g    | g       | g         | g       | g        | g        | g         |
| c                                | 3848892                  | g                        | 3959138                 | g                       | 4026453                  | s                        | g                 | CB9615                               | ++++                                    | g                                    | g        | g    | g  | g         | g      | g     | g       | g        | g   | g    | g      | g   | g       | g     | g       | g    | g    | g       | g         | g       | g        | g        | g         |
| a                                | 3851558                  | a                        | 3961804                 | g                       | 4029119                  | ns                       | a                 | EDL933                               | ++++                                    | a                                    | a        | a    | a  | a         | a      | a     | a       | a        | a   | a    | a      | a   | a       | a     | a       | a    | a    | a       | a         | a       | a        | a        | a         |
| t                                | 3853328                  | c                        | 3963574                 |                         |                          |                          |                   |                                      |                                         |                                      |          |      |    |           |        |       |         |          |     |      |        |     |         |       |         |      |      |         |           |         |          |          |           |











Table S3. Allocation of mutational snps to lineages by virtual outgroup analysis

[illegible]











[illegible]

| O55 and O157 genome site details |                          |                         |                         |                          |                          |                   |                                      |                                         |                            | Outgroup Strain Details <sup>9</sup> |      |    |           |        |       |         |          |     |      |        |     |         |       |         |      |      |         |           |         |          |          |           |
|----------------------------------|--------------------------|-------------------------|-------------------------|--------------------------|--------------------------|-------------------|--------------------------------------|-----------------------------------------|----------------------------|--------------------------------------|------|----|-----------|--------|-------|---------|----------|-----|------|--------|-----|---------|-------|---------|------|------|---------|-----------|---------|----------|----------|-----------|
| CB9615 base <sup>a</sup>         | CB9615 Site <sup>b</sup> | Sakai base <sup>a</sup> | Sakai Site <sup>b</sup> | EDL933 base <sup>a</sup> | EDL933 Site <sup>b</sup> | type <sup>c</sup> | Inferred ancestral base <sup>d</sup> | Lineage inferred to mutate <sup>e</sup> | Support level <sup>f</sup> | D1 Sd197                             | K-12 | HS | ATCC 8739 | UMN026 | IAI39 | SMS 3-5 | E2348/69 | 536 | ED1a | CFT073 | S88 | APEC O1 | UT189 | E24377A | IAI1 | SE11 | F5 8401 | F2a 2457T | F2a 301 | SS Ss046 | B4 Sb227 | B18 BS512 |
| a                                | 5282850                  | g                       | 5444578                 | g                        | 5474571                  | nc                | g                                    | CB9615                                  | +++                        |                                      |      |    | g         |        | g     |         |          | g   | g    | g      |     |         |       |         |      |      |         |           |         |          |          |           |
| t                                | 5283013                  | c                       | 5444741                 | c                        | 5474734                  | nc                | c                                    | CB9615                                  | +++                        |                                      |      |    | c         |        | c     |         |          | c   | c    | c      |     |         |       |         |      |      |         |           |         |          |          |           |
| g                                | 5287498                  | a                       | 5449226                 | a                        | 5479219                  | i                 | ?                                    | O55/O157                                | +/-                        |                                      |      |    |           |        |       |         |          |     |      |        |     |         |       |         |      |      |         |           |         |          |          |           |
| t                                | 5290015                  | t                       | 5451743                 | g                        | 5481736                  | ns                | t                                    | EDL933                                  | ++++                       | t                                    | t    | t  | t         | t      |       | t       |          |     |      |        | t   |         |       | t       | t    | t    | t       | t         | t       | t        | t        | t         |
| -                                | 5291361                  | -                       | 5453089                 | g                        | 5483083                  | ins               | -                                    | EDL933                                  | ++++                       |                                      | -    | -  | -         | -      | -     | -       |          |     |      |        | -   |         |       | -       | -    | -    | -       | -         | -       | -        | -        | -         |
| c                                | 5294752                  | t                       | 5456480                 | t                        | 5486474                  | s                 | c                                    | O157                                    | ++++                       | c                                    | c    | c  | c         | c      | c     | c       | c        | c   | c    | c      | c   | c       | c     | c       | c    | c    | c       | c         | c       | c        | c        | c         |
| c                                | 5295608                  | t                       | 5457336                 | t                        | 5487330                  | ns                | t                                    | CB9615                                  | ++                         | t                                    | t    | t  | t         | t      | c     | t       | c        | t   | c    | t      | t   | t       | t     | t       | t    | t    | t       | t         | t       | t        | t        | t         |
| a                                | 5297417                  | g                       | 5459145                 | g                        | 5489139                  | s                 | a                                    | O157                                    | ++++                       | a                                    | a    | c  | a         | a      | a     | a       | a        | a   | a    | a      | a   | a       | a     | a       | a    | a    | a       | a         | a       | a        | a        | c         |
| a                                | 5298932                  | t                       | 5460660                 | t                        | 5490654                  | ns                | a                                    | O157                                    | ++++                       | a                                    | a    | a  | a         | a      | a     | a       | a        | a   | a    | a      | a   | a       | a     | a       | a    | a    | a       | a         | a       | a        | a        | a         |
| g                                | 5299069                  | a                       | 5460797                 | a                        | 5490791                  | s                 | a                                    | CB9615                                  | ++++                       | a                                    | a    | a  | a         | a      | a     | a       | a        | a   | a    | a      | a   | a       | a     | a       | a    | a    | a       | a         | a       | a        | a        | a         |
| t                                | 5300139                  | g                       | 5461867                 | g                        | 5491861                  | ns                | g                                    | CB9615                                  | ++++                       | g                                    | g    | g  | g         | g      | g     | g       | g        | g   | g    | g      | g   | g       | g     | g       | g    | g    | g       | g         | g       | g        | g        | g         |
| g                                | 5300156                  | t                       | 5461884                 | t                        | 5491878                  | s                 | t                                    | CB9615                                  | ++++                       | t                                    | t    | t  | t         | t      | t     | t       | t        | t   | t    | t      | t   | t       | t     | t       | t    | t    | t       | t         | t       | t        | t        | t         |
| a                                | 5302380                  | g                       | 5464108                 | g                        | 5494102                  | i                 | a                                    | O157                                    | ++++                       | a                                    | a    | a  | a         | a      | a     | a       | a        | a   | a    | a      | a   | a       | a     | a       | a    | a    | a       | a         | a       | a        | a        | a         |
| g                                | 5304105                  | c                       | 5465597                 | c                        | 5495591                  | ns                | g                                    | O157                                    | ++++                       | g                                    | g    | g  | g         | g      | g     | g       | g        | g   | g    | g      | g   | g       | g     | g       | g    | g    | g       | g         | g       | g        | g        | g         |
| t                                | 5305771                  | c                       | 5467263                 | c                        | 5497257                  | ns                | c                                    | CB9615                                  | ++++                       | c                                    | c    | c  | c         | c      | c     | c       | c        | c   | c    | c      | c   | c       | c     | c       | c    | c    | c       | c         | c       | c        | c        | c         |
| c                                | 5356981                  | t                       | 5469081                 | t                        | 5499075                  | i                 | c                                    | O157                                    | ++++                       | c                                    | c    | c  | c         | c      | c     | c       | c        | c   | c    | c      | c   | c       | c     | c       | c    | c    | c       | c         | c       | c        | c        | c         |
| c                                | 5357853                  | t                       | 5469953                 | t                        | 5499947                  | ns                | c                                    | O157                                    | ++++                       | c                                    | c    | c  | c         | c      | c     | c       | c        | c   | c    | c      | c   | c       | c     | c       | c    | c    | c       | c         | c       | c        | c        | c         |
| a                                | 5359368                  | g                       | 5471468                 | g                        | 5501462                  | ns                | g                                    | CB9615                                  | ++++                       | g                                    | g    | g  | g         | g      | g     | g       | g        | g   | g    | g      | g   | g       | g     | g       | g    | g    | g       | g         | g       | g        | g        | g         |
| t                                | 5359719                  | g                       | 5471819                 | g                        | 5501813                  | ns                | g                                    | CB9615                                  | ++                         | g                                    | t    | t  | t         | t      | t     | t       | t        | t   | t    | t      | t   | t       | t     | t       | t    | t    | t       | t         | t       | t        | t        | t         |
| g                                | 5360186                  | g                       | 5472286                 | -                        | 5502279                  | del               | g                                    | EDL933                                  | ++++                       | g                                    | g    | g  | g         | g      | g     | g       | g        | g   | g    | g      | g   | g       | g     | g       | g    | g    | g       | g         | g       | g        | g        | g         |
| t                                | 5360458                  | c                       | 5472558                 | c                        | 5502551                  | ns                | c                                    | CB9615                                  | ++++                       | c                                    | c    | c  | c         | c      | c     | c       | c        | c   | c    | c      | c   | c       | c     | c       | c    | c    | c       | c         | c       | c        | c        | c         |
| g                                | 5361583                  | -                       | 5473682                 | c                        | 5503676                  | del               | g                                    | Sakai                                   | ++++                       | g                                    | g    | g  | g         | g      | g     | g       | g        | g   | g    | g      | g   | g       | g     | g       | g    | g    | g       | g         | g       | g        | g        | g         |
| g                                | 5361583                  | -                       | 5473682                 | c                        | 5503676                  | ns                | g                                    | EDL933                                  | ++++                       | g                                    | g    | g  | g         | g      | g     | g       | g        | g   | g    | g      | g   | g       | g     | g       | g    | g    | g       | g         | g       | g        | g        | g         |
| c                                | 5361584                  | c                       | 5473683                 | g                        | 5503677                  | ns                | c                                    | EDL933                                  | ++++                       | c                                    | c    | c  | c         | c      | c     | c       | c        | c   | c    | c      | c   | c       | c     | c       | c    | c    | c       | c         | c       | c        | c        | c         |
| g                                | 5361585                  | g                       | 5473684                 | a                        | 5503678                  | s                 | g                                    | EDL933                                  | ++++                       | g                                    | g    | g  | g         | g      | g     | g       | g        | g   | g    | g      | g   | g       | g     | g       | g    | g    | g       | g         | g       | g        | g        | g         |
| g                                | 5364082                  | -                       | 5476180                 | g                        | 5506175                  | del               | g                                    | Sakai                                   | ++++                       | g                                    | g    | g  | g         | g      | g     | g       | g        | g   | g    | g      | g   | g       | g     | g       | g    | g    | g       | g         | g       | g        | g        | g         |
| t                                | 5367951                  | c                       | 5480049                 | c                        | 5510044                  | nc                | c                                    | CB9615                                  | ++                         | c                                    | c    | c  | t         | c      | t     | c       | t        | c   | c    | c      | c   | c       | c     | c       | c    | c    | c       | c         | c       | c        | c        | c         |
| t                                | 5368845                  | g                       | 5480943                 | g                        | 5510938                  | nc                | t                                    | O157                                    | ++++                       | t                                    | t    | t  | t         | t      | t     | t       | t        | t   | t    | t      | t   | t       | t     | t       | t    | t    | t       | t         | t       | t        | t        | t         |
| g                                | 5371340                  | a                       | 5483438                 | a                        | 5513433                  | s                 | g                                    | O157                                    | ++++                       | g                                    | g    | g  | g         | g      | g     | g       | g        | g   | g    | g      | g   | g       | g     | g       | g    | g    | g       | g         | g       | g        | g        | g         |
| t                                | 5372126                  | g                       | 5484224                 | g                        | 5514219                  | ns                | g                                    | CB9615                                  | ++++                       | g                                    | g    | g  | g         | g      | g     | g       | g        | g   | g    | g      | g   | g       | g     | g       | g    | g    | g       | g         | g       | g        | g        | g         |
| c                                | 5373072                  | t                       | 5485170                 | t                        | 5515165                  | ns                | c                                    | O157                                    | ++++                       | c                                    | c    | c  | c         | c      | c     | c       | c        | c   | c    | c      | c   | c       | c     | c       | c    | c    | c       | c         | c       | c        | c        | c         |
| c                                | 5373475                  | t                       | 5485573                 | t                        | 5515568                  | i                 | c                                    | O157                                    | ++++                       | c                                    | c    | c  | c         | c      | c     | c       |          |     |      |        |     |         |       |         |      |      |         |           |         |          |          |           |
| t                                | 5375474                  | c                       | 5487572                 | c                        | 5517567                  | s                 | c                                    | CB9615                                  | ++++                       | c                                    | c    | c  | c         | c      | c     | c       | c        | c   | c    | c      | c   | c       | c     | c       | c    | c    | c       | c         | c       | c        | c        | c         |
| g                                | 5378601                  | g                       | 5490699                 | t                        | 5520694                  | ns                | g                                    | EDL933                                  | ++++                       | g                                    | g    | g  | g         | g      | g     | g       | g        | g   | g    | g      | g   | g       | g     | g       | g    | g    | g       | g         | g       | g        | g        | g         |
| g                                | 5378643                  | g                       | 5490741                 | t                        | 5520736                  | s                 | g                                    | EDL933                                  | ++++                       | g                                    | g    | g  | g         | g      | g     | g       | g        | g   | g    | g      | g   | g       | g     | g       | g    | g    | g       | g         | g       | g        | g        | g         |
| c                                | 5381045                  | t                       | 5493143                 | t                        | 5523138                  | s                 | c                                    | O157                                    | ++++                       | c                                    | c    | c  | c         | c      | c     | c       | c        | c   | c    | c      | c   | c       | c     | c       | c    | c    | c       | c         | c       | c        | c        | c         |
| t                                | 5381292                  | g                       | 5493390                 | g                        | 5523385                  | ns                | g                                    | CB9615                                  | ++++                       | g                                    | g    | g  | g         | g      | g     | g       | g        | g   | g    | g      | g   | g       | g     | g       | g    | g    | g       | g         | g       | g        | g        | g         |
| a                                | 5381880                  | g                       | 5493978                 | g                        | 5523973                  | ns                | g                                    | CB9615                                  | ++++                       | g                                    | g    | g  | g         | g      | g     | g       | g        | g   | g    | g      | g   | g       | g     | g       | g    | g    | g       | g         | g       | g        | g        | g         |
| c                                | 5386111                  | t                       | 5498209                 | t                        | 5528204                  | ns                | c                                    | O157                                    | ++++                       | c                                    | c    | c  | c         | c      | c     | c       | c        | c   | c    | c      | c   | c       | c     | c       | c    | c    | c       | c         | c       | c        | c        | c         |

<sup>a</sup>Numbers in place of bases indicates number of bases where >2 bases inserted or deleted. In these cases "-" indicates absence of these bases.

<sup>b</sup>For indels the base indicated is the base before the insertion or deletion in the strain.

<sup>c</sup>s: synonymous; ns: non-synonymous; nc: in non-coding gene; i: intergenic; ins: small insert; del: small deletion; indel: the small indels that can't be allocated

<sup>d</sup>the base present in D1 Sd197 OR if site absent in D1 Sd197, the base in majority outgroup strains OR if base present in D1 Sd197 is not that in any of the O55 and O157 strains, the base in majority outgroup strains

<sup>e</sup>O157: allocated to the lineage to the ancestor of EDL933 and Sakai; Sakai/EDL933: allocated to the divergence between Sakai and EDL933 (strain not specified); O55/O157: allocated to the divergence between O55 and O157 lineages (lineage not specified).

<sup>f</sup>Level of support for allocation of mutation as given in previous column

++++ agreement is high - 8 or more outgroup strains with expected base and at most 1 with an alternative base, and do not present alternative base in D1 Sd197

+++ agreement good - 4 or more outgroup strains with expected base and at most 1 with an alternative base, and do not present alternative base in D1 Sd197

++ agreement in D1 Sd197 regardless of situation with other outgroup strains

+ no conflict but very limited support as either site absent in D1 Sd197, and/or support is less than required for any of the higher levels of support

+/- no conflict but no support (base not present in any outgroup OR base when present is not that in any of the O55 and O157 strains OR both alternative lineages supported equally).

- conflict data implies 2 mutations at that site - eg in the ancestor of O55 and O157 strains before isolation and again in one of the lineages.

IUPAC those insertions due to error in EDL933 sequence

<sup>9</sup>Base, number or "-" indicates the base type or absence of the base. Blank means the site not present.
