# Supplementary material for: Derivation of Escherichia coli O157:H7 from Its O55:H7 Precursor
Source: PLoS One. 2010 Jan 14;5(1):e8700. doi: 10.1371/journal.pone.0008700 (PMC2806823; doi:10.1371/journal.pone.0008700)
Supplement: Table S4 — Virtual outgroup analysis of the recombinant regions in the CB9651, Sakai, and EDL933 genomes. (0.29 MB PDF) [file pone.0008700.s006.pdf]

Table S4. Allocation of recombinational SNPs to lineages by virtual outgroup analysis<sup>a</sup>

| O55 and O157 genome site details |                          |                         |                         |                          |                          |                   |                            |                     |                                      | Outgroup Strain Details <sup>i</sup> |                            |          |      |     |           |         |       |         |          |     |      |        |     |         |       |         |      |      |         |           |         |          |          |           |
|----------------------------------|--------------------------|-------------------------|-------------------------|--------------------------|--------------------------|-------------------|----------------------------|---------------------|--------------------------------------|--------------------------------------|----------------------------|----------|------|-----|-----------|---------|-------|---------|----------|-----|------|--------|-----|---------|-------|---------|------|------|---------|-----------|---------|----------|----------|-----------|
| CB9615 base <sup>b</sup>         | CB9615 Site <sup>c</sup> | Sakai base <sup>a</sup> | Sakai Site <sup>c</sup> | EDL933 base <sup>b</sup> | EDL933 Site <sup>c</sup> | type <sup>d</sup> | Event Lineage <sup>e</sup> | Recombinant segment | Inferred ancestral base <sup>g</sup> | Outgroup Analysis <sup>h</sup>       | Support level <sup>h</sup> | D1 Sc197 | K-12 | HS  | ATCC 8729 | UJMN026 | IA139 | SMS 3-5 | E2348/69 | 536 | ED1a | CFT073 | S88 | APEC O1 | UT189 | E24377A | IA11 | SE11 | F5 8401 | F2a 2457T | F2a 301 | SS Ss046 | B4 Ss227 | B18 BS512 |
| g                                | 272486                   | t                       | 269978                  | t                        | 269979                   | nc                | O55/O157                   | rec01               | t                                    | CB9615                               | ++                         | t        | g    | g   | t         |         |       |         |          |     |      |        |     |         |       | g       | g    | g    |         |           | t       | g        | g        |           |
| a                                | 272489                   | c                       | 269981                  | c                        | 269982                   | nc                | O55/O157                   | rec01               | c                                    | CB9615                               | ++                         | c        | a    | a   | c         |         |       |         |          |     |      |        |     |         |       | a       | a    | a    |         |           | c       | a        | a        |           |
| g                                | 272507                   | c                       | 269999                  | c                        | 270000                   | nc                | O55/O157                   | rec01               | c                                    | CB9615                               | ++                         | c        | g    | g   | g         |         |       |         |          |     |      |        |     |         |       | g       | g    | g    |         |           | c       | g        | g        |           |
| c                                | 272519                   | t                       | 270011                  | t                        | 270012                   | nc                | O55/O157                   | rec01               | c                                    | O157                                 | ++++                       | c        | c    | c   | c         |         |       |         |          |     |      |        |     |         |       | c       | c    | c    |         |           | t       | c        | c        |           |
| t                                | 272540                   | c                       | 270032                  | c                        | 270033                   | nc                | O55/O157                   | rec01               | c                                    | CB9615                               | +                          | g        | c    | t   | t         |         |       |         |          |     |      |        |     |         |       | c       | t    | t    |         |           | c       | c        | g        |           |
| t                                | 272550                   | c                       | 270042                  | c                        | 270043                   | nc                | O55/O157                   | rec01               | t                                    | O157                                 | ++                         | t        | t    | t   | t         |         |       |         |          |     |      |        |     |         |       | c       | t    | t    |         |           | t       | c        | t        |           |
| t                                | 272570                   | c                       | 270062                  | c                        | 270063                   | nc                | O55/O157                   | rec01               | c                                    | CB9615                               | +                          | a        | c    | t   | c         |         |       |         |          |     |      |        |     |         |       | c       | t    | t    |         |           | c       | c        | g        |           |
| g                                | 272573                   | a                       | 270065                  | a                        | 270066                   | nc                | O55/O157                   | rec01               | g                                    | O157                                 | ++++                       | g        | g    | g   | g         |         |       |         |          |     |      |        |     |         |       | g       | g    | g    |         |           | a       | g        | g        |           |
| g                                | 272576                   | a                       | 270068                  | a                        | 270069                   | nc                | O55/O157                   | rec01               | g                                    | O157                                 | ++                         | g        | a    | g   | a         |         |       |         |          |     |      |        |     |         |       | a       | g    | g    |         |           | a       | a        | a        |           |
| g                                | 272591                   | g                       | 270083                  | g                        | 270084                   | nc                | O55/O157                   | rec01               | c                                    | O157                                 | ++++                       | c        | c    | c   | c         |         |       |         |          |     |      |        |     |         |       | c       | c    | c    |         |           | g       | c        | c        |           |
| g                                | 272693                   | c                       | 270185                  | c                        | 270186                   | nc                | O55/O157                   | rec01               | c                                    | CB9615                               | ++                         | c        | g    | c   | g         |         |       |         |          |     |      |        |     |         |       | a       | c    | c    |         |           | a       | g        | g        |           |
| c                                | 272711                   | t                       | 270203                  | t                        | 270204                   | nc                | O55/O157                   | rec01               | c                                    | O157                                 | ++                         | c        | a    | t   | a         |         |       |         |          |     |      |        |     |         |       | c       | t    | t    |         |           | t       | c        | c        |           |
| g                                | 272723                   | c                       | 270215                  | c                        | 270216                   | nc                | O55/O157                   | rec01               | c                                    | CB9615                               | ++                         | c        | g    | c   | g         |         |       |         |          |     |      |        |     |         |       | g       | c    | c    |         |           | g       | g        | g        |           |
| g                                | 272726                   | t                       | 270218                  | t                        | 270219                   | nc                | O55/O157                   | rec01               | g                                    | O157                                 | +                          | a        | g    | t   | g         |         |       |         |          |     |      |        |     |         |       | g       | t    | t    |         |           | g       | g        | g        |           |
| g                                | 272736                   | c                       | 270228                  | c                        | 270229                   | nc                | O55/O157                   | rec01               | g                                    | O157                                 | ++                         | g        | g    | c   | g         |         |       |         |          |     |      |        |     |         |       | g       | c    | c    |         |           | c       | g        | g        |           |
| c                                | 272738                   | a                       | 270230                  | a                        | 270231                   | nc                | O55/O157                   | rec01               | c                                    | O157                                 | +                          | -        | c    | a   | c         |         |       |         |          |     |      |        |     |         |       | c       | a    | a    |         |           | c       | c        | a        |           |
| a                                | 272739                   | c                       | 270231                  | c                        | 270232                   | nc                | O55/O157                   | rec01               | c                                    | CB9615                               | ++                         | c        | a    | c   | a         |         |       |         |          |     |      |        |     |         |       | a       | c    | c    |         |           | c       | a        | c        |           |
| c                                | 272740                   | a                       | 270232                  | a                        | 270233                   | nc                | O55/O157                   | rec01               | a                                    | CB9615                               | ++                         | a        | c    | a   | c         |         |       |         |          |     |      |        |     |         |       | c       | a    | a    |         |           | -       | c        | -        |           |
| c                                | 272741                   | g                       | 270233                  | g                        | 270234                   | nc                | O55/O157                   | rec01               | g                                    | CB9615                               | ++                         | g        | c    | g   | c         |         |       |         |          |     |      |        |     |         |       | c       | g    | g    |         |           | -       | c        | -        |           |
| g                                | 272744                   | a                       | 270236                  | a                        | 270237                   | nc                | O55/O157                   | rec01               | a                                    | CB9615                               | +                          | c        | a    | a   | a         |         |       |         |          |     |      |        |     |         |       | g       | a    | a    |         |           | g       | g        | a        |           |
| c                                | 272745                   | a                       | 270237                  | a                        | 270238                   | nc                | O55/O157                   | rec01               | c                                    | O157                                 | ++                         | c        | c    | a   | c         |         |       |         |          |     |      |        |     |         |       | c       | a    | a    |         |           | c       | c        | a        |           |
| t                                | 272747                   | a                       | 270239                  | a                        | 270240                   | nc                | O55/O157                   | rec01               | t                                    | O157                                 | +                          | c        | t    | a   | t         |         |       |         |          |     |      |        |     |         |       | t       | a    | a    |         |           | t       | t        | c        |           |
| g                                | 272759                   | a                       | 270251                  | a                        | 270252                   | nc                | O55/O157                   | rec01               | a                                    | CB9615                               | ++++                       | t        | a    | a   | a         |         |       |         |          |     |      |        |     |         |       | a       | a    | a    |         |           | a       | a        | a        |           |
| g                                | 272771                   | a                       | 270263                  | a                        | 270264                   | nc                | O55/O157                   | rec01               | g                                    | O157                                 | ++                         | g        | a    | a   | a         |         |       |         |          |     |      |        |     |         |       | g       | a    | a    |         |           | g       | g        | g        |           |
| c                                | 272810                   | t                       | 270302                  | t                        | 270303                   | nc                | O55/O157                   | rec01               | t                                    | CB9615                               | ++                         | t        | c    | t   | c         |         |       |         |          |     |      |        |     |         |       | t       | t    | t    |         |           | c       | t        | t        |           |
| g                                | 272834                   | t                       | 270326                  | t                        | 270327                   | nc                | O55/O157                   | rec01               | t                                    | CB9615                               | +                          | c        | c    | t   | c         |         |       |         |          |     |      |        |     |         |       | c       | t    | t    |         |           | g       | c        | c        |           |
| g                                | 272867                   | t                       | 270359                  | t                        | 270360                   | nc                | O55/O157                   | rec01               | t                                    | CB9615                               | ++++                       | t        | c    | t   | c         |         |       |         |          |     |      |        |     |         |       | t       | t    | t    |         |           | t       | t        | t        |           |
| a                                | 272933                   | c                       | 270425                  | c                        | 270426                   | nc                | O55/O157                   | rec01               | c                                    | CB9615                               | ++++                       | g        | c    | c   | c         |         |       |         |          |     |      |        |     |         |       | c       | c    | c    |         |           | c       | c        | c        |           |
| c                                | 272992                   | g                       | 270484                  | c                        | 270485                   | nc                | Sakai                      | rec02               | c                                    | Sakai                                | ++++                       | a        | c    | c   | c         |         |       |         |          |     |      |        |     |         |       | c       | c    | c    |         |           | c       | c        | c        |           |
| a                                | 273010                   | g                       | 270502                  | a                        | 270503                   | nc                | Sakai                      | rec02               | a                                    | Sakai                                | ++++                       | t        | a    | a   | a         |         |       |         |          |     |      |        |     |         |       | t       | a    | a    |         |           | a       | t        | t        |           |
| c                                | 273053                   | a                       | 270545                  | c                        | 270546                   | nc                | Sakai                      | rec02               | c                                    | Sakai                                | ++++                       | t        | c    | c   | c         |         |       |         |          |     |      |        |     |         |       | c       | c    | c    |         |           | c       | c        | c        |           |
| c                                | 273070                   | g                       | 270562                  | c                        | 270563                   | nc                | Sakai                      | rec02               | c                                    | Sakai                                | ++++                       | c        | c    | c   | c         |         |       |         |          |     |      |        |     |         |       | c       | c    | c    |         |           | c       | c        | c        |           |
| a                                | 273085                   | g                       | 270577                  | a                        | 270578                   | nc                | Sakai                      | rec02               | a                                    | Sakai                                | ++                         | a        | g    | a   | g         |         |       |         |          |     |      |        |     |         |       | g       | a    | a    |         |           | a       | g        | a        |           |
| g                                | 273087                   | a                       | 270579                  | g                        | 270580                   | nc                | Sakai                      | rec02               | g                                    | Sakai                                | ++                         | g        | a    | g   | a         |         |       |         |          |     |      |        |     |         |       | a       | g    | g    |         |           | g       | a        | g        |           |
| a                                | 273092                   | g                       | 270584                  | a                        | 270585                   | nc                | Sakai                      | rec02               | a                                    | Sakai                                | +++                        | a        | t    | a   | t         |         |       |         |          |     |      |        |     |         |       | t       | a    | a    |         |           | a       | t        | a        |           |
| g                                | 273100                   | t                       | 270592                  | g                        | 270593                   | nc                | Sakai                      | rec02               | g                                    | Sakai                                | ++++                       | g        | g    | g   | g         |         |       |         |          |     |      |        |     |         |       | g       | g    | g    |         |           | g       | g        | g        |           |
| c                                | 273102                   | a                       | 270594                  | c                        | 270595                   | nc                | Sakai                      | rec02               | c                                    | Sakai                                | +                          | t        | a    | c   | c         |         |       |         |          |     |      |        |     |         |       | a       | c    | c    |         |           | c       | a        | c        |           |
| a                                | 273103                   | c                       | 270595                  | a                        | 270596                   | nc                | Sakai                      | rec02               | a                                    | Sakai                                | +++                        | g        | g    | a   | g         |         |       |         |          |     |      |        |     |         |       | g       | a    | a    |         |           | a       | g        | g        |           |
| g                                | 273104                   | t                       | 270596                  | g                        | 270597                   | nc                | Sakai                      | rec02               | g                                    | Sakai                                | +++                        | c        | c    | g   | c         |         |       |         |          |     |      |        |     |         |       | c       | g    | g    |         |           | g       | c        | t        |           |
| g                                | 273106                   | c                       | 270598                  | c                        | 270599                   | nc                | Sakai                      | rec02               | c                                    | 2                                    | -                          | c        | c    | g   | g         |         |       |         |          |     |      |        |     |         |       | c       | g    | g    |         |           | g       | c        | g        |           |
| g                                | 273135                   | a                       | 270627                  | g                        | 270628                   | nc                | Sakai                      | rec02               | a                                    | 2                                    | -                          | a        | a    | g   | a         |         |       |         |          |     |      |        |     |         |       | a       | g    | g    |         |           | g       | a        | a        |           |
| a                                | 273154                   | c                       | 270646                  | a                        | 270647                   | nc                | Sakai                      | rec02               | a                                    | Sakai                                | ++++                       | a        | a    | a   | a         |         |       |         |          |     |      |        |     |         |       | a       | a    | a    |         |           | a       | a        | a        |           |
| c                                | 273174                   | t                       | 270666                  | c                        | 270667                   | nc                | Sakai                      | rec02               | c                                    | Sakai                                | ++++                       | c        | c    | c   | c         |         |       |         |          |     |      |        |     |         |       | a       | c    | c    |         |           | c       | c        | c        |           |
| g                                | 273176                   | c                       | 270668                  | g                        | 270669                   | nc                | Sakai                      | rec02               | g                                    | Sakai                                | ++++                       | g        | g    | g   | g         |         |       |         |          |     |      |        |     |         |       | g       | g    | g    |         |           | g       | g        | g        |           |
| g                                | 273182                   | c                       | 270674                  | g                        | 270675                   | nc                | Sakai                      | rec02               | g                                    | Sakai                                | ++++                       | g        | g    | a   | g         |         |       |         |          |     |      |        |     |         |       | g       | a    | a    |         |           | g       | g        | g        |           |
| c                                | 412020                   | t                       | 372460                  | t                        | 372463                   | i                 | O55/O157                   | rec03               | c                                    | O157                                 | +++                        |          | c    |     |           |         |       |         |          | c   | c    | c      | c   | c       |       |         |      |      |         | c         |         |          |          |           |
| a                                | 412048                   | g                       | 372488                  | g                        | 372491                   | i                 | O55/O157                   | rec03               | g                                    | CB9615                               | +                          |          |      |     |           |         |       |         |          | g   | g    | g      | g   | g       |       |         |      |      |         | a         |         |          |          |           |
| c                                | 412101                   | g                       | 372541                  | g                        | 372544                   | i                 | O55/O157                   | rec03               | g                                    | CB9615                               | +++                        |          | g    |     |           |         |       |         |          | g   | g    | g      | g   | g       |       |         |      |      |         | g         |         |          |          |           |
| g                                | 412121                   | a                       | 372561                  | a                        | 372564                   | i                 | O55/O157                   | rec03               | a                                    | CB9615                               | +++                        |          | a    |     |           |         |       |         |          | a   | a    | a      | a   | a       |       |         |      |      |         | a         |         |          |          |           |
| t                                | 412242                   | -                       | 372682                  | -                        | 372684                   | ins               | O55/O157                   | rec03               | -                                    | CB9615                               | +++                        |          | -    |     |           |         |       |         |          | -   | -    | -      | -   | -       |       |         |      |      |         | -         |         |          |          |           |
| t                                | 412309                   | -                       | 372748                  | -                        | 372750                   | ins               | O55/O157                   | rec03               | -                                    | CB9615                               | +++                        |          | -    |     |           |         |       |         |          | -   | -    | -      | -   | -       |       |         |      |      |         | -         |         |          |          |           |
| a                                | 412337                   | g                       | 372776                  | g                        | 372778                   | i                 | O55/O157                   | rec03               | a                                    | O157                                 | +++                        |          | a    |     |           |         |       |         |          | a   | a    | a      | a   | a       |       |         |      |      |         | -         |         |          |          |           |
| g                                | 412358                   | a                       | 372797                  | a                        | 372799                   | i                 | O55/O157                   | rec03               | a                                    | CB9615                               | +++                        |          | a    |     |           |         |       |         |          | a   | a    | a      | a   | a       |       |         |      |      |         | a         |         |          |          |           |
| g                                | 412388                   | a                       | 372827                  | a                        | 372829                   | i                 | O55/O157                   | rec03               | g                                    | O157                                 | +++                        |          | g    |     |           |         |       |         |          | g   | g    | g      | g   | g       |       |         |      |      |         | g         |         |          |          |           |
| a                                | 450717                   | c                       | 411334                  | c                        | 411336                   | nc                | O55/O157                   | rec04               | c                                    | CB9615                               | +                          |          |      |     | c         | c       |       |         |          | c   |      |        |     |         |       |         |      |      |         |           |         |          |          |           |
| t                                | 450735                   | a                       | 411352                  | m                        | 411354                   | nc                | O55/O157                   | rec04               | t                                    | O157                                 | +                          |          |      |     | t         | t       |       |         |          |     |      |        |     |         |       |         |      |      |         |           |         |          |          |           |
| a                                | 450737                   | g                       | 411354                  | g                        | 411356                   | nc                | O55/O157                   | rec04               | g                                    | CB9615                               | +                          |          |      |     | a         | g       |       |         |          |     |      |        |     |         |       |         |      |      |         |           |         |          |          |           |
| t                                | 450738                   | c                       | 411355                  | c                        | 411357                   | nc                | O55/O157                   | rec04               | c                                    | CB9615                               | +                          |          |      |     | c         | t       |       |         |          |     |      |        |     |         |       |         |      |      |         |           |         |          |          |           |
| t                                | 462432                   | t                       | 423049                  | a                        | 423051                   | s                 | EDL933                     | rec05               | t                                    | EDL933                               | ++                         | t        | a    | a   | a         | t       | t     | t       | t        | t   | t    | t      | t   | t       | t     | a       | a    | a    |         |           | a       |          |          |           |
| t                                | 462503                   | t                       | 423120                  | c                        | 423122                   | i                 | EDL933                     | rec05               | t                                    | EDL933                               | ++                         | t        | c    | t</ |           |         |       |         |          |     |      |        |     |         |       |         |      |      |         |           |         |          |          |           |

Table S4. Allocation of recombinational SNPs to lineages by virtual outgroup analysis<sup>a</sup>

| O55 and O157 genome site details |                          |                         |                         |                          |                          |                   |                            |                     |                                      | Outgroup Strain Details <sup>i</sup> |                            |          |      |    |           |         |       |         |          |     |      |        |     |         |       |         |      |      |         |           |         |          |          |           |
|----------------------------------|--------------------------|-------------------------|-------------------------|--------------------------|--------------------------|-------------------|----------------------------|---------------------|--------------------------------------|--------------------------------------|----------------------------|----------|------|----|-----------|---------|-------|---------|----------|-----|------|--------|-----|---------|-------|---------|------|------|---------|-----------|---------|----------|----------|-----------|
| CB9615 base <sup>b</sup>         | CB9615 Site <sup>c</sup> | Sakai base <sup>a</sup> | Sakai Site <sup>c</sup> | EDL933 base <sup>b</sup> | EDL933 Site <sup>c</sup> | type <sup>d</sup> | Event Lineage <sup>e</sup> | Recombinant segment | Inferred ancestral base <sup>g</sup> | Outgroup Analysis <sup>e</sup>       | Support level <sup>h</sup> | D1 Sc197 | K-12 | HS | ATCC 8739 | UJMN026 | IA139 | SMS 3-5 | E2348/69 | 536 | ED1a | CFT073 | S88 | APEC O1 | UT189 | E24377A | IA11 | SE11 | F5 8401 | F2a 2457T | F2a 301 | SS Ss046 | B4 Ss227 | B18 BS512 |
| t                                | 660141                   | g                       | 620143                  | g                        | 619837                   | nc                | O55/O157                   | rec07               | g                                    | CB9615                               | ++                         | g        | t    | t  | t         |         |       |         |          |     |      |        |     |         |       | g       | t    | g    |         |           |         | g        | t        | t         |
| t                                | 660162                   | c                       | 620164                  | c                        | 619858                   | nc                | O55/O157                   | rec07               | c                                    | CB9615                               | ++                         | c        | t    | c  | t         |         |       |         |          |     |      |        |     |         |       | c       | c    | c    |         |           |         | c        | c        | c         |
| c                                | 660165                   | g                       | 620167                  | g                        | 619861                   | nc                | O55/O157                   | rec07               | c                                    | O157                                 | ++                         | c        | c    | g  | c         |         |       |         |          |     |      |        |     |         |       | g       | g    | g    |         |           |         | c        | a        | c         |
| a                                | 660174                   | c                       | 620176                  | c                        | 619870                   | nc                | O55/O157                   | rec07               | c                                    | CB9615                               | ++                         | c        | a    | t  | a         |         |       |         |          |     |      |        |     |         |       | c       | c    | c    |         |           |         | c        | c        | c         |
| a                                | 660178                   | c                       | 620180                  | c                        | 619874                   | nc                | O55/O157                   | rec07               | c                                    | CB9615                               | ++                         | c        | a    | a  | a         |         |       |         |          |     |      |        |     |         |       | c       | c    | c    |         |           |         | c        | c        | c         |
| g                                | 660192                   | a                       | 620194                  | a                        | 619888                   | nc                | O55/O157                   | rec07               | a                                    | CB9615                               | ++                         | a        | g    | a  | g         |         |       |         |          |     |      |        |     |         |       | a       | a    | a    |         |           |         | a        | a        | a         |
| t                                | 660198                   | c                       | 620200                  | c                        | 619894                   | nc                | O55/O157                   | rec07               | c                                    | CB9615                               | ++                         | c        | t    | c  | t         |         |       |         |          |     |      |        |     |         |       | c       | c    | c    |         |           |         | c        | c        | c         |
| a                                | 660207                   | g                       | 620209                  | g                        | 619903                   | nc                | O55/O157                   | rec07               | ?                                    | O55/O157                             | +/-                        | c        | a    | a  | a         |         |       |         |          |     |      |        |     |         |       | g       | g    | g    |         |           |         | c        | g        | g         |
| a                                | 660241                   | g                       | 620243                  | g                        | 619937                   | nc                | O55/O157                   | rec07               | a                                    | O157                                 | ++                         | a        | a    | a  | a         |         |       |         |          |     |      |        |     |         |       | g       | g    | g    |         |           |         | a        | g        | a         |
| g                                | 660255                   | c                       | 620257                  | c                        | 619951                   | nc                | O55/O157                   | rec07               | g                                    | O157                                 | ++                         | g        | g    | a  | g         |         |       |         |          |     |      |        |     |         |       | c       | c    | c    |         |           |         | g        | c        | t         |
| g                                | 660256                   | a                       | 620258                  | a                        | 619952                   | nc                | O55/O157                   | rec07               | g                                    | O157                                 | ++                         | g        | g    | a  | g         |         |       |         |          |     |      |        |     |         |       | a       | a    | a    |         |           |         | g        | a        | a         |
| g                                | 660261                   | a                       | 620263                  | a                        | 619957                   | nc                | O55/O157                   | rec07               | a                                    | CB9615                               | ++                         | a        | g    | a  | g         |         |       |         |          |     |      |        |     |         |       | a       | a    | a    |         |           |         | g        | a        | a         |
| g                                | 660267                   | c                       | 620269                  | c                        | 619963                   | nc                | O55/O157                   | rec07               | c                                    | CB9615                               | ++                         | c        | g    | g  | g         |         |       |         |          |     |      |        |     |         |       | c       | c    | c    |         |           |         | c        | c        | g         |
| c                                | 660273                   | t                       | 620275                  | t                        | 619969                   | nc                | O55/O157                   | rec07               | t                                    | CB9615                               | ++                         | t        | c    | t  | c         |         |       |         |          |     |      |        |     |         |       | c       | c    | c    |         |           |         | t        | t        | t         |
| a                                | 660282                   | g                       | 620284                  | g                        | 619978                   | nc                | O55/O157                   | rec07               | g                                    | CB9615                               | ++                         | g        | a    | g  | a         |         |       |         |          |     |      |        |     |         |       | g       | g    | g    |         |           |         | g        | g        | g         |
| g                                | 660294                   | c                       | 620296                  | c                        | 619990                   | nc                | O55/O157                   | rec07               | c                                    | CB9615                               | ++                         | c        | g    | c  | g         |         |       |         |          |     |      |        |     |         |       | c       | c    | c    |         |           |         | c        | c        | c         |
| a                                | 660306                   | g                       | 620308                  | g                        | 620002                   | nc                | O55/O157                   | rec07               | g                                    | CB9615                               | ++                         | g        | a    | g  | a         |         |       |         |          |     |      |        |     |         |       | g       | g    | g    |         |           |         | g        | g        | g         |
| c                                | 660311                   | a                       | 620313                  | a                        | 620007                   | nc                | O55/O157                   | rec07               | c                                    | O157                                 | ++                         | c        | c    | t  | c         |         |       |         |          |     |      |        |     |         |       | a       | a    | a    |         |           |         | c        | a        | a         |
| c                                | 660315                   | g                       | 620317                  | g                        | 620011                   | nc                | O55/O157                   | rec07               | g                                    | CB9615                               | +                          | t        | c    | g  | c         |         |       |         |          |     |      |        |     |         |       | g       | g    | g    |         |           |         | t        | a        | g         |
| t                                | 660330                   | c                       | 620332                  | c                        | 620026                   | nc                | O55/O157                   | rec07               | c                                    | CB9615                               | ++                         | c        | t    | -  | t         |         |       |         |          |     |      |        |     |         |       | c       | c    | c    |         |           |         | c        | c        | c         |
| a                                | 660334                   | g                       | 620336                  | g                        | 620030                   | nc                | O55/O157                   | rec07               | g                                    | CB9615                               | ++                         | g        | a    | -  | a         |         |       |         |          |     |      |        |     |         |       | g       | g    | g    |         |           |         | g        | g        | g         |
| c                                | 660339                   | g                       | 620341                  | g                        | 620035                   | nc                | O55/O157                   | rec07               | c                                    | O157                                 | +                          | t        | c    | g  | c         |         |       |         |          |     |      |        |     |         |       | g       | g    | g    |         |           |         | t        | t        | c         |
| c                                | 660345                   | t                       | 620347                  | t                        | 620041                   | nc                | O55/O157                   | rec07               | t                                    | CB9615                               | ++                         | t        | c    | t  | c         |         |       |         |          |     |      |        |     |         |       | c       | c    | c    |         |           |         | t        | t        | t         |
| g                                | 660351                   | a                       | 620353                  | a                        | 620047                   | nc                | O55/O157                   | rec07               | g                                    | O157                                 | ++                         | g        | g    | g  | g         |         |       |         |          |     |      |        |     |         |       | a       | a    | a    |         |           |         | g        | g        | g         |
| c                                | 660354                   | t                       | 620356                  | t                        | 620050                   | nc                | O55/O157                   | rec07               | c                                    | O157                                 | ++                         | c        | c    | a  | c         |         |       |         |          |     |      |        |     |         |       | t       | t    | t    |         |           |         | c        | c        | c         |
| g                                | 660384                   | a                       | 620386                  | a                        | 620080                   | nc                | O55/O157                   | rec07               | g                                    | O157                                 | ++                         | g        | g    | g  | g         |         |       |         |          |     |      |        |     |         |       | a       | a    | a    |         |           |         | g        | g        | g         |
| c                                | 660502                   | a                       | 620504                  | a                        | 620198                   | nc                | O55/O157                   | rec07               | c                                    | O157                                 | ++++                       | c        | c    | a  | c         |         |       |         |          |     |      |        |     |         |       | c       | c    | c    |         |           |         | c        | c        | c         |
| t                                | 660514                   | c                       | 620516                  | c                        | 620210                   | nc                | O55/O157                   | rec07               | c                                    | CB9615                               | ++++                       | c        | c    | c  | c         |         |       |         |          |     |      |        |     |         |       | c       | c    | c    |         |           |         | c        | c        | c         |
| t                                | 824795                   | c                       | 735367                  | c                        | 735149                   | nc                | CB9615                     | rec08               | c                                    | CB9615                               | ++++                       | c        | c    | c  | c         | c       | c     | c       | c        | c   | c    | c      | c   | c       | c     | c       | c    | c    | c       | c         | c       | c        | c        | c         |
| a                                | 824813                   | g                       | 735385                  | g                        | 735167                   | nc                | CB9615                     | rec08               | g                                    | CB9615                               | ++++                       | g        | g    | g  | g         | g       | g     | g       | g        | g   | g    | g      | g   | g       | g     | g       | g    | g    | g       | g         | g       | g        | g        | g         |
| t                                | 824867                   | g                       | 735439                  | g                        | 735221                   | nc                | CB9615                     | rec08               | g                                    | CB9615                               | ++++                       | g        | g    | g  | g         | g       | g     | g       | g        | g   | g    | g      | g   | g       | g     | g       | g    | g    | g       | g         | g       | g        | g        | g         |
| a                                | 824868                   | c                       | 735440                  | c                        | 735222                   | nc                | CB9615                     | rec08               | c                                    | CB9615                               | ++++                       | c        | c    | c  | c         | c       | c     | c       | c        | c   | c    | c      | c   | c       | c     | c       | c    | c    | c       | c         | c       | c        | c        | c         |
| a                                | 824869                   | g                       | 735441                  | g                        | 735223                   | nc                | CB9615                     | rec08               | g                                    | CB9615                               | ++++                       | g        | g    | g  | g         | g       | g     | g       | g        | g   | g    | g      | g   | g       | g     | g       | g    | g    | g       | g         | g       | g        | g        | g         |
| -                                | 824869                   | c                       | 735442                  | c                        | 735224                   | del               | CB9615                     | rec08               | c                                    | CB9615                               | ++++                       | c        | c    | c  | c         | c       | c     | c       | c        | c   | c    | c      | c   | c       | c     | c       | c    | c    | c       | c         | c       | c        | c        |           |
| a                                | 900304                   | g                       | 810840                  | g                        | 810623                   | s                 | O55/O157                   | rec09               | a                                    | O157                                 | ++                         | a        | g    | g  | g         |         |       |         |          |     |      |        |     |         |       | g       | g    | g    |         |           |         | a        | g        | g         |
| c                                | 900361                   | g                       | 810897                  | g                        | 810680                   | s                 | O55/O157                   | rec09               | c                                    | O157                                 | ++++                       | c        | c    | c  | c         |         |       |         |          |     |      |        |     |         |       | g       | c    | c    |         |           |         | c        | c        | c         |
| c                                | 900364                   | t                       | 810900                  | t                        | 810683                   | s                 | O55/O157                   | rec09               | c                                    | O157                                 | ++++                       | c        | c    | c  | c         |         |       |         |          |     |      |        |     |         |       | t       | c    | c    |         |           |         | c        | c        | c         |
| c                                | 900423                   | a                       | 810959                  | a                        | 810742                   | ns                | O55/O157                   | rec09               | c                                    | O157                                 | ++                         | c        | c    | c  | c         |         |       |         |          |     |      |        |     |         |       | a       | a    | c    |         |           |         | c        | c        | c         |
| g                                | 900580                   | a                       | 811116                  | a                        | 810899                   | s                 | O55/O157                   | rec09               | a                                    | CB9615                               | ++                         | a        | g    | g  | g         |         |       |         |          |     |      |        |     |         |       | g       | g    | g    |         |           |         | a        | a        | a         |
| g                                | 900595                   | a                       | 811131                  | a                        | 810914                   | s                 | O55/O157                   | rec09               | a                                    | CB9615                               | ++                         | a        | a    | a  | g         |         |       |         |          |     |      |        |     |         |       | g       | g    | g    |         |           |         | a        | g        | a         |
| g                                | 900597                   | c                       | 811133                  | c                        | 810916                   | ns                | O55/O157                   | rec09               | c                                    | CB9615                               | ++                         | c        | c    | c  | g         |         |       |         |          |     |      |        |     |         |       | g       | g    | g    |         |           |         | c        | g        | c         |
| c                                | 900649                   | t                       | 811185                  | t                        | 810968                   | s                 | O55/O157                   | rec09               | t                                    | CB9615                               | ++                         | t        | t    | t  | c         |         |       |         |          |     |      |        |     |         |       | t       | t    | t    |         |           |         | c        | t        | t         |
| t                                | 900655                   | c                       | 811191                  | c                        | 810974                   | s                 | O55/O157                   | rec09               | c                                    | CB9615                               | ++                         | c        | c    | c  | t         |         |       |         |          |     |      |        |     |         |       | c       | c    | t    |         |           |         | t        | c        | c         |
| g                                | 900940                   | c                       | 811476                  | c                        | 813130                   | s                 | O55/O157                   | rec09               | g                                    | O157                                 | ++                         | g        | c    | c  | g         |         |       |         |          |     |      |        |     |         |       | g       | g    | g    |         |           |         | g        | g        | g         |
| c                                | 900949                   | t                       | 811485                  | t                        | 813139                   | s                 | O55/O157                   | rec09               | c                                    | O157                                 | ++++                       | c        | c    | t  | c         |         |       |         |          |     |      |        |     |         |       | c       | c    | c    |         |           |         | c        | c        | c         |
| c                                | 900951                   | a                       | 811487                  | a                        | 813141                   | ns                | O55/O157                   | rec09               | c                                    | O157                                 | ++++                       | c        | c    | a  | c         |         |       |         |          |     |      |        |     |         |       | c       | c    | c    |         |           |         | c        | c        | c         |
| t                                | 900961                   | a                       | 811497                  | a                        | 813151                   | s                 | O55/O157                   | rec09               | a                                    | CB9615                               | ++++                       | a        | a    | a  | a         |         |       |         |          |     |      |        |     |         |       | a       | a    | a    |         |           |         | a        | a        | a         |
| a                                | 900988                   | g                       | 811524                  | g                        | 813178                   | s                 | O55/O157                   | rec09               | a                                    | O157                                 | ++                         | a        | a    | g  | a         |         |       |         |          |     |      |        |     |         |       | a       | a    | a    |         |           |         | g        | g        | g         |
| t                                | 901016                   | c                       | 811552                  | c                        | 813206                   | ns                | O55/O157                   | rec09               | c                                    | CB9615                               | ++++                       | c        | c    | c  | c         |         |       |         |          |     |      |        |     |         |       | c       | c    | c    |         |           |         | c        | c        | c         |
| c                                | 901021                   | t                       | 811557                  | t                        | 813211                   | s                 | O55/O157                   | rec09               | c                                    | O157                                 | ++                         | c        | t    | t  | t         |         |       |         |          |     |      |        |     |         |       | t       | t    | t    |         |           |         | t        | c        | c         |
| c                                | 901036                   | t                       | 811572                  | t                        | 813226                   | s                 | O55/O157                   | rec09               | c                                    | O157                                 | ++                         | c        | t    | t  | t         |         |       |         |          |     |      |        |     |         |       | t       | t    | t    |         |           |         | t        | t        | t         |
| t                                | 901051                   | g                       | 811587                  | g                        | 813241                   | s                 | O55/O157                   | rec09               | g                                    | CB9615                               | ++++                       | g        | g    | g  | g         |         |       |         |          |     |      |        |     |         |       | g       | g    | g    |         |           |         | g        | g        | g         |
| g                                | 903884                   | a                       | 814420                  | a                        | 816074                   | ns                | O55/O157                   | rec10               | g                                    | O157                                 | ++++                       | g        | g    | g  | g         |         |       |         |          |     | g    | g      |     |         |       | g       | g    | g    |         |           |         | g        |          | g         |
| t                                | 903930                   | c                       | 814466                  | c                        | 816120                   | ns                | O55/O157                   | rec10               | t                                    | O157                                 | ++                         | t        | t    | t  | t         |         |       |         |          |     | c    | c      |     |         |       | c       | c    | c    |         |           |         | t        | t        | t         |
| a                                | 904195                   | g                       | 814731                  | g                        | 816385                   | ns                | O55/O157                   | rec10               | g                                    | CB9615                               | ++++                       | g        | g    | g  | g         |         |       |         |          |     | g    | g      |     |         |       | g       | g    | g    |         |           |         | g        |          | g         |
| a                                | 904288                   | c                       | 814824                  | c                        | 816478                   | ns                | O55/O157                   | rec10               | a                                    | O157                                 | ++++                       | a        | a    | a  | a         |         |       |         |          |     |      |        |     |         |       | a       | a    | a    |         |           |         | a        | a        | a         |
| t                                | 904289                   | c                       | 814825                  | c                        | 816479                   | ns                |                            |                     |                                      |                                      |                            |          |      |    |           |         |       |         |          |     |      |        |     |         |       |         |      |      |         |           |         |          |          |           |



Table S4. Allocation of recombinational SNPs to lineages by virtual outgroup analysis<sup>a</sup>

| O55 and O157 genome site details |                          |                         |                         |                          |                          |                   |                            |                     |                                      | Outgroup Strain Details <sup>i</sup> |                            |          |      |    |           |         |       |         |          |     |      |        |     |         |       |         |      |      |         |           |         |         |         |           |   |
|----------------------------------|--------------------------|-------------------------|-------------------------|--------------------------|--------------------------|-------------------|----------------------------|---------------------|--------------------------------------|--------------------------------------|----------------------------|----------|------|----|-----------|---------|-------|---------|----------|-----|------|--------|-----|---------|-------|---------|------|------|---------|-----------|---------|---------|---------|-----------|---|
| CB9615 base <sup>b</sup>         | CB9615 Site <sup>c</sup> | Sakai base <sup>a</sup> | Sakai Site <sup>c</sup> | EDL933 base <sup>b</sup> | EDL933 Site <sup>c</sup> | type <sup>d</sup> | Event Lineage <sup>e</sup> | Recombinant segment | Inferred ancestral base <sup>b</sup> | Outgroup Analysis <sup>e</sup>       | Support level <sup>h</sup> | D1 Sc197 | K-12 | HS | ATCC 8729 | UJMN026 | IA139 | SMS 3-5 | E2348/69 | 536 | ED1a | CFT073 | S88 | APEC O1 | UT189 | E24377A | IA11 | SE11 | F5 8401 | F2a 2457T | F2a 301 | SS S046 | B4 S027 | B18 BS512 |   |
| t                                | 1019193                  | c                       | 922164                  | c                        | 923815                   | i                 | O55/O157                   | rec14               | c                                    | CB9615                               | +                          | c        | c    | c  | c         | c       | t     | c       | c        | c   | c    | c      | c   | c       | c     | c       | c    | c    | t       | t         | t       | c       | c       | c         |   |
| g                                | 1019214                  | t                       | 922185                  | t                        | 923836                   | i                 | O55/O157                   | rec14               | g                                    | O157                                 | ++++                       | g        | g    | g  | g         | g       | g     | g       | g        | g   | g    | g      | g   | g       | g     | g       | g    | g    | g       | g         | g       | g       | g       | g         |   |
| a                                | 1019217                  | g                       | 922188                  | g                        | 923839                   | i                 | O55/O157                   | rec14               | a                                    | O157                                 | ++++                       | a        | a    | a  | a         | a       | a     | a       | a        | a   | a    | a      | a   | a       | a     | a       | a    | a    | a       | a         | a       | a       | a       | a         |   |
| c                                | 1019236                  | g                       | 922207                  | g                        | 923858                   | ns                | O55/O157                   | rec14               | g                                    | CB9615                               | +                          | g        | g    | c  | t         | t       | g     | g       | g        | g   | g    | g      | g   | g       | g     | g       | g    | g    | c       | c         | c       | c       | c       | c         |   |
| a                                | 1019240                  | g                       | 922211                  | g                        | 923862                   | ns                | O55/O157                   | rec14               | g                                    | CB9615                               | +                          | g        | g    | g  | a         | g       | g     | g       | g        | g   | g    | g      | g   | g       | g     | g       | g    | g    | a       | a         | a       | g       | g       | g         |   |
| c                                | 1019244                  | a                       | 922215                  | a                        | 923866                   | s                 | O55/O157                   | rec14               | a                                    | CB9615                               | ++++                       | a        | a    | a  | c         | t       | t     | a       | a        | t   | a    | a      | a   | a       | a     | a       | a    | a    | a       | a         | a       | a       | a       | a         | a |
| c                                | 1019247                  | a                       | 922218                  | a                        | 923869                   | s                 | O55/O157                   | rec14               | c                                    | O157                                 | +                          | c        | c    | c  | c         | t       | t     | c       | c        | t   | c    | c      | t   | a       | a     | a       | a    | a    | a       | c         | c       | c       | c       | c         | c |
| t                                | 1019253                  | g                       | 922224                  | g                        | 923875                   | ns                | O55/O157                   | rec14               | g                                    | CB9615                               | ++++                       | g        | g    | g  | g         | g       | g     | g       | g        | g   | g    | g      | g   | g       | g     | g       | g    | g    | g       | g         | g       | g       | g       | g         | g |
| t                                | 1019274                  | c                       | 922245                  | c                        | 923896                   | s                 | O55/O157                   | rec14               | c                                    | CB9615                               | +                          | c        | c    | c  | c         | t       | t     | c       | c        | t   | c    | c      | c   | c       | c     | c       | c    | c    | c       | t         | t       | t       | c       | t         | c |
| c                                | 1019285                  | t                       | 922256                  | t                        | 923907                   | ns                | O55/O157                   | rec14               | c                                    | O157                                 | ++++                       | c        | c    | c  | c         | c       | c     | c       | c        | c   | c    | c      | c   | c       | c     | c       | c    | c    | c       | c         | c       | c       | c       | c         | c |
| a                                | 1019298                  | g                       | 922269                  | g                        | 923920                   | s                 | O55/O157                   | rec14               | g                                    | CB9615                               | +                          | g        | g    | g  | a         | a       | g     | g       | g        | g   | g    | g      | g   | g       | g     | g       | g    | g    | g       | g         | g       | g       | g       | g         | g |
| a                                | 1019304                  | g                       | 922275                  | g                        | 923926                   | s                 | O55/O157                   | rec14               | a                                    | O157                                 | +                          | g        | g    | a  | g         | g       | a     | g       | g        | g   | g    | g      | g   | a       | a     | a       | a    | a    | a       | a         | a       | a       | a       | a         | a |
| g                                | 1019325                  | a                       | 922296                  | a                        | 923947                   | s                 | O55/O157                   | rec14               | g                                    | O157                                 | +                          | a        | a    | g  | c         | c       | g     | g       | c        | g   | c    | g      | g   | c       | g     | g       | g    | g    | g       | g         | g       | g       | g       | g         | g |
| g                                | 1019328                  | a                       | 922299                  | a                        | 923950                   | s                 | O55/O157                   | rec14               | g                                    | O157                                 | ++++                       | g        | g    | g  | g         | g       | g     | g       | g        | g   | g    | g      | g   | g       | g     | g       | g    | g    | g       | g         | g       | g       | g       | g         | g |
| t                                | 1019341                  | a                       | 922312                  | a                        | 923963                   | s                 | O55/O157                   | rec14               | t                                    | O157                                 | ++++                       | t        | c    | c  | c         | c       | c     | c       | c        | c   | c    | c      | c   | c       | c     | c       | c    | c    | c       | c         | c       | c       | c       | c         | c |
| c                                | 1019342                  | g                       | 922313                  | g                        | 923964                   | s                 | O55/O157                   | rec14               | c                                    | O157                                 | +                          | c        | g    | g  | a         | a       | g     | t       | a        | c   | c    | a      | c   | c       | c     | c       | c    | c    | c       | c         | c       | c       | c       | c         | c |
| g                                | 1019343                  | t                       | 922314                  | t                        | 923965                   | s                 | O55/O157                   | rec14               | g                                    | O157                                 | +                          | g        | t    | g  | c         | t       | g     | g       | t        | g   | g    | t      | g   | g       | g     | g       | g    | g    | g       | g         | g       | g       | g       | g         | g |
| a                                | 1019347                  | g                       | 922318                  | g                        | 923969                   | ns                | O55/O157                   | rec14               | a                                    | O157                                 | +                          | a        | a    | a  | g         | g       | a     | a       | g        | a   | a    | a      | t   | a       | a     | a       | a    | a    | a       | a         | a       | a       | a       | a         | a |
| t                                | 1019351                  | c                       | 922322                  | c                        | 923973                   | ns                | O55/O157                   | rec14               | t                                    | O157                                 | +                          | t        | c    | t  | t         | t       | c     | c       | t        | t   | t    | t      | t   | t       | t     | t       | t    | t    | t       | t         | t       | t       | t       | t         | t |
| g                                | 1019422                  | a                       | 922393                  | a                        | 924044                   | ns                | O55/O157                   | rec14               | g                                    | O157                                 | +                          | a        | a    | a  | a         | g       | g     | a       | g        | g   | g    | g      | g   | g       | g     | g       | g    | g    | g       | g         | g       | g       | g       | g         | g |
| g                                | 1019424                  | t                       | 922395                  | t                        | 924046                   | ns                | O55/O157                   | rec14               | g                                    | O157                                 | +                          | t        | t    | g  | t         | g       | g     | t       | g        | g   | g    | g      | g   | g       | g     | g       | g    | g    | g       | g         | g       | g       | g       | g         | g |
| a                                | 1019430                  | c                       | 922401                  | c                        | 924052                   | s                 | O55/O157                   | rec14               | a                                    | O157                                 | +                          | a        | a    | t  | t         | a       | a     | a       | a        | a   | a    | a      | a   | a       | a     | a       | a    | a    | a       | a         | a       | a       | a       | a         | a |
| c                                | 1019436                  | t                       | 922407                  | t                        | 924058                   | s                 | O55/O157                   | rec14               | c                                    | O157                                 | +                          | t        | t    | c  | t         | t       | c     | t       | t        | c   | c    | t      | c   | c       | c     | c       | c    | c    | c       | c         | c       | c       | c       | c         | c |
| t                                | 1019480                  | c                       | 922451                  | c                        | 924102                   | ns                | O55/O157                   | rec14               | c                                    | CB9615                               | ++++                       | c        | c    | c  | c         | c       | c     | c       | c        | c   | c    | c      | c   | c       | c     | c       | c    | c    | c       | c         | c       | c       | c       | c         | c |
| a                                | 1019493                  | g                       | 922464                  | g                        | 924115                   | s                 | O55/O157                   | rec14               | a                                    | O157                                 | +                          | g        | a    | a  | a         | a       | a     | g       | a        | a   | a    | a      | a   | a       | a     | a       | a    | a    | a       | a         | a       | a       | a       | a         | a |
| c                                | 1019498                  | a                       | 922469                  | a                        | 924120                   | ns                | O55/O157                   | rec14               | c                                    | O157                                 | ++++                       | c        | c    | c  | c         | c       | c     | c       | c        | c   | c    | c      | c   | c       | c     | c       | c    | c    | c       | c         | c       | c       | c       | c         | c |
| g                                | 1019529                  | a                       | 922500                  | a                        | 924151                   | s                 | O55/O157                   | rec14               | g                                    | O157                                 | ++++                       | g        | g    | g  | g         | g       | g     | g       | g        | g   | g    | g      | g   | g       | g     | g       | g    | g    | g       | g         | g       | g       | g       | g         | g |
| c                                | 1019544                  | t                       | 922515                  | t                        | 924166                   | s                 | O55/O157                   | rec14               | c                                    | O157                                 | ++++                       | c        | c    | c  | c         | c       | c     | c       | c        | c   | c    | c      | c   | c       | c     | c       | c    | c    | c       | c         | c       | c       | c       | c         | c |
| c                                | 1019562                  | t                       | 922533                  | t                        | 924184                   | s                 | O55/O157                   | rec14               | c                                    | O157                                 | +                          | c        | c    | c  | c         | t       | c     | c       | t        | c   | c    | c      | c   | c       | c     | c       | c    | c    | c       | c         | c       | c       | c       | c         | c |
| a                                | 1019581                  | g                       | 922552                  | g                        | 924203                   | ns                | O55/O157                   | rec14               | g                                    | CB9615                               | +                          | g        | a    | a  | g         | g       | g     | g       | a        | g   | g    | g      | a   | g       | g     | g       | g    | g    | g       | g         | g       | g       | g       | g         | g |
| c                                | 1019607                  | t                       | 922578                  | t                        | 924229                   | s                 | O55/O157                   | rec14               | c                                    | O157                                 | +                          | c        | c    | c  | c         | c       | c     | c       | c        | c   | c    | c      | c   | c       | c     | c       | c    | c    | c       | c         | c       | c       | c       | c         | c |
| c                                | 1019620                  | t                       | 922591                  | t                        | 924242                   | ns                | O55/O157                   | rec14               | c                                    | O157                                 | ++++                       | c        | a    | c  | c         | c       | c     | g       | c        | c   | c    | c      | c   | c       | c     | c       | c    | c    | c       | c         | c       | c       | c       | c         | c |
| t                                | 1019622                  | c                       | 922593                  | c                        | 924244                   | ns                | O55/O157                   | rec14               | c                                    | CB9615                               | +                          | c        | c    | c  | c         | c       | c     | g       | c        | t   | t    | c      | c   | t       | t     | c       | c    | c    | c       | c         | c       | c       | c       | c         | c |
| t                                | 1019775                  | c                       | 922746                  | c                        | 924397                   | s                 | O55/O157                   | rec14               | t                                    | O157                                 | ++++                       | t        | t    | c  | t         | t       | t     | t       | t        | t   | t    | t      | t   | t       | t     | t       | t    | t    | t       | t         | t       | t       | t       | t         | t |
| c                                | 1019778                  | t                       | 922749                  | t                        | 924400                   | s                 | O55/O157                   | rec14               | c                                    | O157                                 | +                          | c        | t    | t  | c         | c       | t     | c       | t        | t   | c    | c      | t   | t       | t     | t       | t    | t    | t       | t         | t       | t       | t       | t         | t |
| g                                | 1019820                  | a                       | 922791                  | a                        | 924442                   | s                 | O55/O157                   | rec14               | g                                    | O157                                 | +                          | g        | a    | a  | g         | g       | a     | a       | a        | g   | a    | a      | g   | a       | a     | a       | a    | a    | a       | a         | a       | a       | a       | a         | a |
| c                                | 1019823                  | t                       | 922794                  | t                        | 924445                   | s                 | O55/O157                   | rec14               | c                                    | O157                                 | ++++                       | c        | c    | c  | c         | c       | c     | c       | c        | c   | c    | c      | c   | c       | c     | c       | c    | c    | c       | c         | c       | c       | c       | c         | c |
| 5                                | 1019831                  | -                       | 922801                  | -                        | 924452                   | del-5             | O55/O157                   | rec14               | 5                                    | O157                                 | ++++                       | 5        | 5    | 5  | 5         | 5       | 5     | 5       | 5        | 5   | 5    | 5      | 5   | 5       | 5     | 5       | 5    | 5    | 5       | 5         | 5       | 5       | 5       | 5         | 5 |
| t                                | 1019844                  | c                       | 922810                  | c                        | 924461                   | i                 | O55/O157                   | rec14               | t                                    | O157                                 | ++++                       | t        | t    | t  | t         | t       | t     | t       | t        | t   | t    | t      | t   | t       | t     | t       | t    | t    | t       | t         | t       | t       | t       | t         | t |
| g                                | 1019884                  | a                       | 922850                  | a                        | 924501                   | i                 | O55/O157                   | rec14               | g                                    | O157                                 | +                          | g        | g    | g  | g         | a       | a     | g       | a        | a   | a    | a      | g   | g       | g     | g       | g    | g    | g       | g         | g       | g       | g       | g         | g |
| a                                | 1019888                  | g                       | 922854                  | g                        | 924505                   | ns                | O55/O157                   | rec14               | a                                    | O157                                 | +                          | a        | a    | a  | a         | g       | g     | a       | a        | a   | a    | a      | a   | a       | a     | a       | a    | a    | a       | a         | a       | a       | a       | a         | a |
| a                                | 1019889                  | g                       | 922855                  | g                        | 924506                   | ns                | O55/O157                   | rec14               | a                                    | O157                                 | ++++                       | a        | a    | a  | a         | a       | a     | a       | a        | a   | a    | a      | a   | a       | a     | a       | a    | a    | a       | a         | a       | a       | a       | a         | a |
| -                                | 1019896                  | 3                       | 922863                  | 3                        | 924514                   | ins-3             | O55/O157                   | rec14               | -                                    | O157                                 | +                          | -        | -    | -  | -         | 3       | 3     | -       | -        | -   | -    | 3      | 3   | -       | -     | -       | -    | -    | -       | -         | -       | -       | -       | -         |   |
| a                                | 1019900                  | c                       | 922869                  | c                        | 924520                   | ns                | O55/O157                   | rec14               | a                                    | O157                                 | ++++                       | a        | c    | a  | a         | a       | a     | a       | a        | a   | a    | a      | a   | a       | a     | a       | a    | a    | a       | a         | a       | a       | a       | a         |   |
| g                                | 1019902                  | a                       | 922871                  | a                        | 924522                   | ns                | O55/O157                   | rec14               | g                                    | O157                                 | +                          | g        | g    | g  | g         | a       | a     | g       | a        | a   | a    | g      | g   | g       | g     | g       | g    | g    | g       | g         | g       | g       | g       | g         | g |
| t                                | 1019905                  | a                       | 922874                  | a                        | 924525                   | s                 | O55/O157                   | rec14               | t                                    | O157                                 | ++++                       | t        | t    | t  | t         | c       | c     | t       | c        | c   | c    | c      | c   | c       | c     | c       | c    | c    | c       | c         | c       | c       | c       | c         | c |
| t                                | 1019911                  | c                       | 922880                  | c                        | 924531                   | s                 | O55/O157                   | rec14               | t                                    | O157                                 | ++++                       | t        | t    | t  | t         | t       | t     | t       | t        | t   | t    | t      | t   | t       | t     | t       | t    | t    | t       | t         | t       | t       | t       | t         | t |
| a                                | 1019914                  | g                       | 922883                  | g                        | 924534                   | s                 | O55/O157                   | rec14               | a                                    | O157                                 | +                          | a        | a    | a  | a         | g       | g     | a       | g        | a   | g    | g      | a   | a       | a     | a       | a    | a    | a       | a         | a       | a       | a       | a         | a |
| c                                | 1019923                  | t                       | 922892                  | t                        | 924543                   | s                 | O55/O157                   | rec14               | c                                    | O157                                 | +                          | c        | t    | c  | c         | t       | t     | c       | c        | c   | c    | c      | c   | c       | c     | c       | c    | c    | c       | c         | c       | c       | c       | c         | c |
| c                                | 1019926                  | t                       | 922895                  | t                        | 924546                   | s                 | O55/O157                   | rec14               | c                                    | O157                                 | +                          | c        | c    | c  | c         | c       | t     | t       | c        | c   | c    | c      | c   | c       | c     | c       | c    | c    | c       | c         | c       | c       | c       | c         | c |
| a                                | 1019927                  | g                       | 922896                  | g                        | 924547                   | ns                | O55/O157                   | rec14               | a                                    | O157                                 | +                          | a        | g    | a  | a         | g       | g     | a       | a        | a   | a    | g      | g   | g       | g     | g       | g    | g    | g       | g         | g       | g       | g       | g         | g |
| a                                | 1019929                  | g                       | 922898                  | g                        | 924549                   | ns                | O55/O157                   | rec14               | a                                    | O157                                 | +                          | a        | a    | a  | a         | g       | g     | a       | a        | a   | a    | g      | g   | g       | g     |         |      |      |         |           |         |         |         |           |   |

Table S4. Allocation of recombinational SNPs to lineages by virtual outgroup analysis<sup>a</sup>

[illegible]







Table S4. Allocation of recombinational SNPs to lineages by virtual outgroup analysis<sup>a</sup>

| O55 and O157 genome site details |                          |                         |                         |                          |                          |                   |                            |                     |                                      | Outgroup Strain Details <sup>i</sup> |                            |          |      |    |           |         |       |         |          |     |      |        |     |         |       |         |      |      |         |           |          |          |           |
|----------------------------------|--------------------------|-------------------------|-------------------------|--------------------------|--------------------------|-------------------|----------------------------|---------------------|--------------------------------------|--------------------------------------|----------------------------|----------|------|----|-----------|---------|-------|---------|----------|-----|------|--------|-----|---------|-------|---------|------|------|---------|-----------|----------|----------|-----------|
| CB9615 base <sup>b</sup>         | CB9615 Site <sup>c</sup> | Sakai base <sup>a</sup> | Sakai Site <sup>c</sup> | EDL933 base <sup>b</sup> | EDL933 Site <sup>c</sup> | type <sup>d</sup> | Event Lineage <sup>e</sup> | Recombinant segment | Inferred ancestral base <sup>a</sup> | Outgroup Analysis <sup>e</sup>       | Support level <sup>h</sup> | D1 Sc197 | K-12 | HS | ATCC 8729 | UJMN026 | IA139 | SMS 3-5 | E2348/69 | 536 | ED1a | CFT073 | S88 | APEC O1 | UT189 | E24377A | IA11 | SE11 | F5 8401 | F2a 2457T | SS Ss046 | B4 Sb227 | B18 BS512 |
| -                                | 1355153                  | t                       | 1454038                 | K                        | 1537810                  | i                 | EDL933                     | rec19               | t                                    | EDL933                               | +++                        | g        |      |    | g         |         | t     | t       | g        | t   | g    | g      |     | t       | g     |         |      |      |         |           |          |          |           |
| -                                | 1355153                  | t                       | 1454040                 | W                        | 1537812                  | i                 | EDL933                     | rec19               | t                                    | EDL933                               | +++                        | t        |      |    | t         |         | t     | t       | t        | t   | t    | t      |     | a       | t     |         |      |      |         |           |          |          |           |
| -                                | 1355153                  | a                       | 1454042                 | W                        | 1537814                  | i                 | EDL933                     | rec19               | a                                    | EDL933                               | +++                        | a        |      |    | a         |         | a     | a       | a        | g   | a    | a      |     | a       | a     |         |      |      |         |           |          |          |           |
| -                                | 1355153                  | c                       | 1454044                 | M                        | 1537816                  | i                 | EDL933                     | rec19               | c                                    | EDL933                               | +++                        | c        |      |    | c         |         | c     | c       | a        | c   | c    | c      |     | c       | c     |         |      |      |         |           |          |          |           |
| -                                | 1355153                  | a                       | 1454046                 | M                        | 1537818                  | i                 | EDL933                     | rec19               | a                                    | EDL933                               | +++                        | a        |      |    | a         |         | a     | a       | a        | a   | a    | a      |     | a       | a     |         |      |      |         |           |          |          |           |
| -                                | 1355153                  | t                       | 1454047                 | Y                        | 1537819                  | i                 | EDL933                     | rec19               | t                                    | EDL933                               | +                          | c        |      |    | c         |         | c     | t       | c        | t   | c    | c      |     | t       | c     |         |      |      |         |           |          |          |           |
| -                                | 1355153                  | g                       | 1454048                 | R                        | 1537820                  | i                 | EDL933                     | rec19               | g                                    | EDL933                               | +++                        | g        |      |    | g         |         | g     | g       | g        | g   | g    | g      |     | g       | g     |         |      |      |         |           |          |          |           |
| -                                | 1355153                  | c                       | 1454049                 | S                        | 1537821                  | i                 | EDL933                     | rec19               | c                                    | EDL933                               | +                          | a        |      |    | a         |         | a     | c       | a        | c   | a    | a      |     | c       | a     |         |      |      |         |           |          |          |           |
| -                                | 1355153                  | a                       | 1454050                 | W                        | 1537822                  | i                 | EDL933                     | rec19               | a                                    | EDL933                               | +++                        | a        |      |    | a         |         | a     | a       | a        | a   | a    | a      |     | a       | a     |         |      |      |         |           |          |          |           |
| -                                | 1355153                  | t                       | 1454051                 | K                        | 1537823                  | i                 | EDL933                     | rec19               | t                                    | EDL933                               | +++                        | t        |      |    | t         |         | t     | t       | t        | t   | t    | t      |     | t       | t     |         |      |      |         |           |          |          |           |
| -                                | 1355153                  | a                       | 1454052                 | R                        | 1537824                  | i                 | EDL933                     | rec19               | a                                    | EDL933                               | +++                        | a        |      |    | a         |         | a     | a       | a        | a   | a    | a      |     | a       | a     |         |      |      |         |           |          |          |           |
| -                                | 1355153                  | a                       | 1454054                 | M                        | 1537826                  | i                 | EDL933                     | rec19               | a                                    | EDL933                               | +++                        | a        |      |    | a         |         | a     | a       | a        | a   | a    | a      |     | a       | a     |         |      |      |         |           |          |          |           |
| -                                | 1355153                  | t                       | 1454055                 | K                        | 1537827                  | i                 | EDL933                     | rec19               | t                                    | EDL933                               | +                          | c        |      |    | c         |         | c     | t       | c        | t   | c    | c      |     | c       | c     |         |      |      |         |           |          |          |           |
| -                                | 1355153                  | c                       | 1454056                 | S                        | 1537828                  | i                 | EDL933                     | rec19               | c                                    | EDL933                               | +++                        | c        |      |    | c         |         | c     | c       | c        | c   | c    | c      |     | c       | c     |         |      |      |         |           |          |          |           |
| -                                | 1355153                  | t                       | 1454057                 | Y                        | 1537829                  | i                 | EDL933                     | rec19               | t                                    | EDL933                               | +++                        | t        |      |    | t         |         | t     | t       | t        | t   | t    | t      |     | t       | t     |         |      |      |         |           |          |          |           |
| -                                | 1355153                  | t                       | 1454058                 | W                        | 1537830                  | i                 | EDL933                     | rec19               | t                                    | EDL933                               | +++                        | t        |      |    | t         |         | t     | t       | t        | t   | t    | t      |     | t       | t     |         |      |      |         |           |          |          |           |
| -                                | 1355153                  | a                       | 1454060                 | W                        | 1537832                  | i                 | EDL933                     | rec19               | a                                    | EDL933                               | +++                        | a        |      |    | a         |         | a     | a       | a        | a   | a    | a      |     | a       | a     |         |      |      |         |           |          |          |           |
| -                                | 1355153                  | c                       | 1454061                 | S                        | 1537833                  | i                 | EDL933                     | rec19               | c                                    | EDL933                               | +++                        | c        |      |    | c         |         | c     | c       | c        | c   | c    | c      |     | c       | c     |         |      |      |         |           |          |          |           |
| -                                | 1355153                  | c                       | 1454062                 | M                        | 1537834                  | i                 | EDL933                     | rec19               | c                                    | EDL933                               | +++                        | c        |      |    | c         |         | c     | c       | c        | c   | c    | c      |     | c       | c     |         |      |      |         |           |          |          |           |
| -                                | 1355153                  | g                       | 1454063                 | S                        | 1537835                  | i                 | EDL933                     | rec19               | g                                    | EDL933                               | +++                        | g        |      |    | g         |         | g     | g       | g        | g   | g    | g      |     | g       | g     |         |      |      |         |           |          |          |           |
| -                                | 1355153                  | a                       | 1454064                 | R                        | 1537836                  | i                 | EDL933                     | rec19               | a                                    | EDL933                               | +++                        | a        |      |    | a         |         | a     | a       | a        | a   | a    | a      |     | a       | a     |         |      |      |         |           |          |          |           |
| -                                | 1355153                  | a                       | 1454065                 | W                        | 1537837                  | i                 | EDL933                     | rec19               | a                                    | EDL933                               | +++                        | a        |      |    | a         |         | a     | a       | a        | a   | a    | a      |     | a       | a     |         |      |      |         |           |          |          |           |
| -                                | 1355153                  | c                       | 1454068                 | Y                        | 1537840                  | i                 | EDL933                     | rec19               | c                                    | EDL933                               | +++                        | c        |      |    | c         |         | c     | c       | c        | c   | c    | c      |     | c       | c     |         |      |      |         |           |          |          |           |
| -                                | 1355153                  | g                       | 1454069                 | R                        | 1537841                  | i                 | EDL933                     | rec19               | g                                    | EDL933                               | +++                        | g        |      |    | g         |         | g     | g       | g        | g   | g    | g      |     | g       | g     |         |      |      |         |           |          |          |           |
| -                                | 1355153                  | g                       | 1454070                 | K                        | 1537842                  | i                 | EDL933                     | rec19               | g                                    | EDL933                               | +++                        | g        |      |    | g         |         | g     | g       | g        | g   | g    | g      |     | g       | g     |         |      |      |         |           |          |          |           |
| -                                | 1355153                  | t                       | 1454071                 | K                        | 1537843                  | i                 | EDL933                     | rec19               | t                                    | EDL933                               | +++                        | t        |      |    | t         |         | t     | t       | t        | t   | t    | t      |     | t       | t     |         |      |      |         |           |          |          |           |
| -                                | 1439906                  | t                       | 1552060                 | c                        | 1637156                  | ns                | Sakai/EDL933               | rec20               | c                                    | Sakai                                | +++                        | c        | c    |    | c         | c       | c     | c       | c        | c   | c    | c      |     | c       | c     |         |      |      |         |           |          |          |           |
| -                                | 1439906                  | a                       | 1552061                 | t                        | 1637157                  | ns                | Sakai/EDL933               | rec20               | a                                    | EDL933                               | ++                         | a        | t    |    | t         | t       | t     | a       | a        | a   | a    | a      |     | a       | t     |         |      |      |         |           |          |          |           |
| -                                | 1439906                  | c                       | 1552064                 | t                        | 1637160                  | ns                | Sakai/EDL933               | rec20               | c                                    | EDL933                               | ++                         | c        | t    |    | t         | t       | t     | c       | c        | c   | c    | c      |     | c       | t     |         |      |      |         |           |          |          |           |
| -                                | 1439906                  | t                       | 1552079                 | c                        | 1637175                  | ns                | Sakai/EDL933               | rec20               | c                                    | Sakai                                | +++                        | c        | c    |    | c         | c       | c     | c       | c        | c   | c    | c      |     | c       | c     |         |      |      |         |           |          |          |           |
| -                                | 1439906                  | c                       | 1552088                 | t                        | 1637184                  | ns                | Sakai/EDL933               | rec20               | c                                    | EDL933                               | +++                        | c        | a    |    | a         | a       | c     | c       | c        | c   | c    | c      |     | a       | c     |         |      |      |         |           |          |          |           |
| -                                | 1439906                  | t                       | 1552094                 | a                        | 1637190                  | ns                | Sakai/EDL933               | rec20               | t                                    | EDL933                               | ++                         | t        | t    |    | t         | t       | a     | t       | t        | t   | t    | t      |     | t       | a     |         |      |      |         |           |          |          |           |
| -                                | 1439906                  | c                       | 1552097                 | t                        | 1637193                  | ns                | Sakai/EDL933               | rec20               | c                                    | EDL933                               | ++                         | c        | c    |    | c         | c       | t     | c       | c        | c   | c    | c      |     | c       | t     |         |      |      |         |           |          |          |           |
| -                                | 1439906                  | g                       | 1552151                 | c                        | 1637247                  | ns                | Sakai/EDL933               | rec20               | c                                    | Sakai                                | +                          | t        | t    |    | t         | t       | t     | c       | t        | t   | t    | t      |     | t       | t     |         |      |      |         |           |          |          |           |
| -                                | 1439906                  | g                       | 1552154                 | c                        | 1637250                  | ns                | Sakai/EDL933               | rec20               | c                                    | Sakai                                | +++                        | c        | c    |    | c         | c       | c     | c       | c        | c   | c    | c      |     | c       | c     |         |      |      |         |           |          |          |           |
| -                                | 1439906                  | t                       | 1552163                 | c                        | 1637259                  | ns                | Sakai/EDL933               | rec20               | c                                    | Sakai                                | +++                        | c        | g    |    | g         | g       | c     | c       | c        | c   | c    | a      |     | g       | c     |         |      |      |         |           |          |          |           |
| -                                | 1439906                  | t                       | 1552166                 | a                        | 1637262                  | ns                | Sakai/EDL933               | rec20               | a                                    | Sakai                                | +++                        | a        | a    |    | a         | a       | a     | a       | a        | a   | a    | a      |     | a       | a     |         |      |      |         |           |          |          |           |
| -                                | 1439906                  | g                       | 1552172                 | t                        | 1637268                  | ns                | Sakai/EDL933               | rec20               | g                                    | EDL933                               | +++                        | c        | g    |    | g         | g       | c     | c       | c        | c   | c    | c      |     | g       | c     |         |      |      |         |           |          |          |           |
| -                                | 1439906                  | t                       | 1552175                 | g                        | 1637271                  | ns                | Sakai/EDL933               | rec20               | g                                    | Sakai                                | +++                        | g        | g    |    | g         | g       | g     | g       | g        | g   | g    | g      |     | g       | g     |         |      |      |         |           |          |          |           |
| -                                | 1439906                  | a                       | 1552215                 | g                        | 1637311                  | ns                | Sakai/EDL933               | rec20               | g                                    | Sakai                                | +++                        | g        | g    |    | g         | g       | g     | g       | g        | g   | g    | g      |     | g       | g     |         |      |      |         |           |          |          |           |
| -                                | 1439906                  | t                       | 1552223                 | c                        | 1637319                  | ns                | Sakai/EDL933               | rec20               | t                                    | EDL933                               | ++                         | t        | t    |    | t         | t       | c     | c       | t        | t   | c    | c      |     | t       | c     |         |      |      |         |           |          |          |           |
| -                                | 1439906                  | g                       | 1552239                 | a                        | 1637335                  | ns                | Sakai/EDL933               | rec20               | a                                    | Sakai                                | +++                        | a        | a    |    | a         | a       | a     | t       | a        | a   | t    | t      |     | g       | a     |         |      |      |         |           |          |          |           |
| -                                | 1439906                  | c                       | 1552240                 | t                        | 1637336                  | ns                | Sakai/EDL933               | rec20               | c                                    | EDL933                               | +++                        | c        | c    |    | c         | c       | c     | c       | c        | c   | c    | c      |     | c       | c     |         |      |      |         |           |          |          |           |
| -                                | 1439906                  | g                       | 1552247                 | a                        | 1637343                  | ns                | Sakai/EDL933               | rec20               | g                                    | EDL933                               | ++                         | g        | g    |    | g         | g       | g     | a       | g        | a   | a    | g      |     | g       | g     |         |      |      |         |           |          |          |           |
| -                                | 1439906                  | t                       | 1552250                 | g                        | 1637346                  | ns                | Sakai/EDL933               | rec20               | t                                    | EDL933                               | ++                         | t        | g    |    | g         | g       | g     | g       | t        | t   | g    | g      |     | g       | t     |         |      |      |         |           |          |          |           |
| -                                | 1439906                  | t                       | 1552259                 | g                        | 1637355                  | ns                | Sakai/EDL933               | rec20               | t                                    | EDL933                               | ++                         | t        | t    |    | t         | t       | g     | g       | t        | t   | g    | g      |     | g       | t     |         |      |      |         |           |          |          |           |
| -                                | 1439906                  | g                       | 1552283                 | a                        | 1637379                  | ns                | Sakai/EDL933               | rec20               | g                                    | EDL933                               | +++                        | g        | g    |    | g         | g       | g     | g       | g        | g   | g    | g      |     | g       | g     |         |      |      |         |           |          |          |           |
| -                                | 1439906                  | c                       | 1552287                 | t                        | 1637383                  | ns                | Sakai/EDL933               | rec20               | c                                    | EDL933                               | ++                         | c        | t    |    | t         | t       | c     | c       | c        | c   | c    | t      |     | t       | c     |         |      |      |         |           |          |          |           |
| -                                | 1439906                  | c                       | 1552300                 | t                        | 1637396                  | ns                | Sakai/EDL933               | rec20               | c                                    | EDL933                               | ++                         | c        | t    |    | t         | t       | c     | c       | c        | c   | c    | c      |     | t       | c     |         |      |      |         |           |          |          |           |
| -                                | 1439906                  | g                       | 1552307                 | a                        | 1637403                  | ns                | Sakai/EDL933               | rec20               | g                                    | EDL933                               | ++                         | g        | a    |    | t         | a       | g     | g       | g        | g   | g    | a      |     | g       | g     |         |      |      |         |           |          |          |           |
| -                                | 1439906                  | c                       | 1552308                 | t                        | 1637404                  | ns                | Sakai/EDL933               | rec20               | c                                    | EDL933                               | +++                        | c        | c    |    | c         | c       | c     | c       | c        | c   | c    | c      |     | c       | c     |         |      |      |         |           |          |          |           |
| -                                | 1439906                  | g                       | 1552313                 | t                        | 1637409                  | ns                | Sakai/EDL933               | rec20               | g                                    | EDL933                               | ++                         | g        | t    |    | t         | t       | g     | g       | g        | g   | g    | g      |     | g       | g     |         |      |      |         |           |          |          |           |
| -                                | 1439906                  | a                       | 1552316                 | g                        | 1637412                  | ns                | Sakai/EDL933               | rec20               | a                                    | EDL933                               | ++                         | a        | g    |    | g         | g       | g     | a       | a        | a   | a    | a      |     | g       | a     |         |      |      |         |           |          |          |           |
| -                                | 1439906                  | g                       | 1552319                 | a                        | 1637415                  | ns                | Sakai/EDL933               | rec20               | g                                    | EDL933                               | ++                         | g        | t    |    | t         | t       | a     | g       | g        | g   | g    | g      |     | a       | t     |         |      |      |         |           |          |          |           |
| -                                | 1439906                  | t                       | 1552324                 | c                        | 1637420                  | ns                | Sakai/EDL933               | rec20               | t                                    | EDL933                               | ++                         | t        | c    |    | c         | c       | t     | t       | t        | t   | t    | t      |     | c       | t     |         |      |      |         |           |          |          |           |
| -                                | 1439906                  | a                       | 1552325                 | g                        | 1637421                  | ns                | Sakai/EDL933               | rec20               | a                                    | EDL933                               | ++                         | a        | g    |    | g         | g       | a     | a       | a        | a   | a    | a      |     | g       | a     |         |      |      |         |           |          |          |           |
| -                                | 1439906                  | g                       | 1552334                 | t                        | 1637430                  | ns                | Sakai/EDL933               | rec20               | g                                    | EDL933                               | ++                         | g        | g    |    | g         | g       | t     | g       | g        | g   | g    | t      |     | g       | t     |         |      |      |         |           |          |          |           |
| -                                | 1439906                  | g                       | 15                      |                          |                          |                   |                            |                     |                                      |                                      |                            |          |      |    |           |         |       |         |          |     |      |        |     |         |       |         |      |      |         |           |          |          |           |









Table S4. Allocation of recombinational SNPs to lineages by virtual outgroup analysis<sup>a</sup>

| O55 and O157 genome site details |                          |                         |                         |                          |                          |                   |                            |                     |                                      | Outgroup Strain Details <sup>i</sup> |                            |          |      |    |           |         |       |         |          |     |      |        |     |         |       |         |      |      |         |           |         |          |          |           |
|----------------------------------|--------------------------|-------------------------|-------------------------|--------------------------|--------------------------|-------------------|----------------------------|---------------------|--------------------------------------|--------------------------------------|----------------------------|----------|------|----|-----------|---------|-------|---------|----------|-----|------|--------|-----|---------|-------|---------|------|------|---------|-----------|---------|----------|----------|-----------|
| CB9615 base <sup>b</sup>         | CB9615 Site <sup>c</sup> | Sakai base <sup>a</sup> | Sakai Site <sup>c</sup> | EDL933 base <sup>b</sup> | EDL933 Site <sup>c</sup> | type <sup>d</sup> | Event Lineage <sup>e</sup> | Recombinant segment | Inferred ancestral base <sup>a</sup> | Outgroup Analysis <sup>e</sup>       | Support level <sup>h</sup> | D1 Sc197 | K-12 | HS | ATCC 8739 | UJMN026 | IA139 | SMS 3-5 | E2348/69 | 536 | ED1a | CFT073 | S88 | APEC O1 | UT189 | E24377A | IA11 | SE11 | F5 8401 | F2a 2457T | F2a 301 | SS Ss046 | B4 Sb227 | B18 BS512 |
| g                                | 1851065                  | g                       | 2046603                 | a                        | 2041866                  | nc                | EDL933                     | rec33               | a                                    | 2                                    | -                          | a        | g    | g  | g         |         |       |         |          |     |      |        |     |         |       | g       | g    | a    |         |           |         | g        | g        | g         |
| g                                | 1851088                  | g                       | 2046626                 | t                        | 2041843                  | nc                | EDL933                     | rec33               | g                                    | EDL933                               | ++++                       | g        | g    | g  | g         |         |       |         |          |     |      |        |     |         |       | g       | g    | g    |         |           |         | g        | g        | g         |
| g                                | 1851100                  | g                       | 2046638                 | c                        | 2041831                  | nc                | EDL933                     | rec33               | g                                    | EDL933                               | ++++                       | g        | g    | c  | g         |         |       |         |          |     |      |        |     |         |       | g       | g    | g    |         |           |         | g        | g        | g         |
| c                                | 1851101                  | c                       | 2046639                 | t                        | 2041830                  | nc                | EDL933                     | rec33               | c                                    | EDL933                               | ++++                       | c        | c    | c  | c         |         |       |         |          |     |      |        |     |         |       | c       | c    | c    |         |           |         | c        | c        | c         |
| g                                | 1851104                  | g                       | 2046642                 | c                        | 2041827                  | nc                | EDL933                     | rec33               | c                                    | 2                                    | -                          | c        | g    | c  | g         |         |       |         |          |     |      |        |     |         |       | g       | g    | g    |         |           |         | g        | g        | g         |
| g                                | 1851307                  | a                       | 2046845                 | a                        | 2041624                  | nc                | O55/O157                   | rec34               | g                                    | O157                                 | +                          | c        | g    | t  | g         |         |       |         |          |     |      |        |     |         |       | a       | a    | g    |         |           |         | g        | g        | g         |
| c                                | 1851318                  | g                       | 2046856                 | g                        | 2041613                  | nc                | O55/O157                   | rec34               | c                                    | O157                                 | ++++                       | c        | c    | c  | c         |         |       |         |          |     |      |        |     |         |       | c       | g    | c    |         |           |         | c        | c        | c         |
| t                                | 1851330                  | c                       | 2046868                 | c                        | 2041601                  | nc                | O55/O157                   | rec34               | t                                    | O157                                 | ++                         | t        | t    | c  | t         |         |       |         |          |     |      |        |     |         |       | t       | c    | t    |         |           |         | t        | t        | t         |
| c                                | 1851421                  | t                       | 2046959                 | t                        | 2041510                  | nc                | O55/O157                   | rec34               | c                                    | O157                                 | ++++                       | c        | c    | c  | c         |         |       |         |          |     |      |        |     |         |       | c       | c    | c    |         |           |         | c        | c        | c         |
| g                                | 1851438                  | c                       | 2046976                 | c                        | 2041493                  | nc                | O55/O157                   | rec34               | c                                    | CB9615                               | ++++                       | c        | c    | c  | c         |         |       |         |          |     |      |        |     |         |       | g       | c    | c    |         |           |         | c        | c        | c         |
| t                                | 1851448                  | c                       | 2046986                 | c                        | 2041483                  | nc                | O55/O157                   | rec34               | c                                    | CB9615                               | ++                         | c        | c    | t  | c         |         |       |         |          |     |      |        |     |         |       | t       | c    | t    |         |           |         | c        | c        | c         |
| g                                | 1851485                  | a                       | 2047023                 | a                        | 2041446                  | nc                | O55/O157                   | rec34               | g                                    | O157                                 | ++                         | g        | a    | a  | a         |         |       |         |          |     |      |        |     |         |       | g       | a    | g    |         |           |         | a        | g        | a         |
| g                                | 1851487                  | c                       | 2047025                 | c                        | 2041444                  | nc                | O55/O157                   | rec34               | c                                    | CB9615                               | ++                         | c        | g    | c  | g         |         |       |         |          |     |      |        |     |         |       | g       | c    | g    |         |           |         | g        | c        | a         |
| a                                | 1851505                  | g                       | 2047043                 | g                        | 2041426                  | nc                | O55/O157                   | rec34               | g                                    | CB9615                               | ++                         | g        | a    | g  | a         |         |       |         |          |     |      |        |     |         |       | a       | g    | a    |         |           |         | a        | g        | g         |
| a                                | 1851688                  | c                       | 2047226                 | c                        | 2041243                  | nc                | O55/O157                   | rec34               | c                                    | CB9615                               | ++++                       | t        | c    | g  | c         |         |       |         |          |     |      |        |     |         |       | a       | c    | c    |         |           |         | c        | c        | c         |
| t                                | 1851727                  | c                       | 2047265                 | c                        | 2041204                  | nc                | O55/O157                   | rec34               | c                                    | CB9615                               | ++++                       | c        | c    | c  | c         |         |       |         |          |     |      |        |     |         |       | c       | c    | c    |         |           |         | c        | c        | c         |
| a                                | 1851742                  | g                       | 2047280                 | g                        | 2041189                  | nc                | O55/O157                   | rec34               | g                                    | CB9615                               | ++++                       | g        | g    | g  | g         |         |       |         |          |     |      |        |     |         |       | g       | g    | g    |         |           |         | g        | g        | g         |
| g                                | 1851943                  | a                       | 2047481                 | a                        | 2040988                  | nc                | O55/O157                   | rec34               | g                                    | O157                                 | +                          | c        | g    | g  | g         |         |       |         |          |     |      |        |     |         |       | a       | g    | a    |         |           |         | g        | c        | a         |
| g                                | 1851952                  | c                       | 2047490                 | c                        | 2040979                  | nc                | O55/O157                   | rec34               | c                                    | CB9615                               | ++                         | c        | g    | a  | g         |         |       |         |          |     |      |        |     |         |       | c       | g    | c    |         |           |         | g        | c        | t         |
| t                                | 1852006                  | g                       | 2047544                 | g                        | 2040925                  | nc                | O55/O157                   | rec34               | g                                    | CB9615                               | +                          | c        | g    | t  | g         |         |       |         |          |     |      |        |     |         |       | g       | g    | g    |         |           |         | g        | t        | g         |
| c                                | 1852048                  | t                       | 2047586                 | t                        | 2040883                  | nc                | O55/O157                   | rec34               | t                                    | CB9615                               | ++                         | t        | t    | g  | c         |         |       |         |          |     |      |        |     |         |       | c       | c    | t    |         |           |         | c        | t        | t         |
| c                                | 1852066                  | t                       | 2047604                 | t                        | 2040865                  | nc                | O55/O157                   | rec34               | c                                    | O157                                 | ++++                       | c        | c    | c  | c         |         |       |         |          |     |      |        |     |         |       | c       | c    | c    |         |           |         | c        | c        | c         |
| c                                | 1852069                  | t                       | 2047607                 | t                        | 2040862                  | nc                | O55/O157                   | rec34               | c                                    | O157                                 | ++++                       | g        | c    | t  | c         |         |       |         |          |     |      |        |     |         |       | c       | c    | c    |         |           |         | c        | g        | g         |
| t                                | 1852070                  | c                       | 2047608                 | c                        | 2040861                  | nc                | O55/O157                   | rec34               | c                                    | CB9615                               | ++++                       | c        | c    | c  | c         |         |       |         |          |     |      |        |     |         |       | c       | c    | c    |         |           |         | c        | c        | c         |
| c                                | 1852090                  | t                       | 2047628                 | t                        | 2040841                  | nc                | O55/O157                   | rec34               | c                                    | O157                                 | ++++                       | c        | c    | g  | c         |         |       |         |          |     |      |        |     |         |       | c       | c    | c    |         |           |         | c        | c        | t         |
| c                                | 1852099                  | t                       | 2047637                 | t                        | 2040832                  | nc                | O55/O157                   | rec34               | c                                    | O157                                 | ++                         | c        | c    | t  | c         |         |       |         |          |     |      |        |     |         |       | t       | t    | c    |         |           |         | t        | t        | c         |
| t                                | 1852107                  | g                       | 2047645                 | g                        | 2040824                  | nc                | O55/O157                   | rec34               | t                                    | O157                                 | ++++                       | a        | t    | c  | t         |         |       |         |          |     |      |        |     |         |       | t       | t    | t    |         |           |         | t        | t        | t         |
| t                                | 1852140                  | c                       | 2047678                 | c                        | 2040791                  | nc                | O55/O157                   | rec34               | t                                    | O157                                 | ++                         | t        | c    | c  | c         |         |       |         |          |     |      |        |     |         |       | c       | c    | c    |         |           |         | c        | c        | t         |
| c                                | 1852216                  | t                       | 2047754                 | t                        | 2040715                  | nc                | O55/O157                   | rec34               | c                                    | O157                                 | ++++                       | c        | c    | -  | c         |         |       |         |          |     |      |        |     |         |       | c       | c    | c    |         |           |         | c        | c        | c         |
| g                                | 1852261                  | a                       | 2047799                 | a                        | 2040670                  | nc                | O55/O157                   | rec34               | g                                    | O157                                 | ++++                       | g        | g    | t  | g         |         |       |         |          |     |      |        |     |         |       | g       | g    | g    |         |           |         | g        | g        | g         |
| a                                | 1852303                  | g                       | 2047841                 | g                        | 2040628                  | nc                | O55/O157                   | rec34               | a                                    | O157                                 | ++                         | a        | g    | g  | g         |         |       |         |          |     |      |        |     |         |       | a       | g    | g    |         |           |         | g        | g        | a         |
| c                                | 1852306                  | t                       | 2047844                 | t                        | 2040625                  | nc                | O55/O157                   | rec34               | c                                    | O157                                 | ++++                       | c        | c    | t  | c         |         |       |         |          |     |      |        |     |         |       | c       | c    | c    |         |           |         | c        | c        | c         |
| t                                | 1852312                  | c                       | 2047850                 | c                        | 2040619                  | nc                | O55/O157                   | rec34               | t                                    | O157                                 | ++++                       | t        | t    | t  | t         |         |       |         |          |     |      |        |     |         |       | t       | t    | t    |         |           |         | t        | t        | a         |
| -                                | 1963488                  | g                       | 2160964                 | Y                        | 1927506                  | ns                | Sakai/EDL933               | rec35               | g                                    | EDL933                               | ++++                       |          |      |    |           |         |       |         |          | a   |      |        |     |         |       |         |      |      |         |           |         |          |          |           |
| -                                | 1963488                  | g                       | 2160982                 | m                        | 1927488                  | ns                | Sakai/EDL933               | rec35               | g                                    | EDL933                               | ++++                       |          |      |    |           |         |       |         |          | t   |      |        |     |         |       |         |      |      |         |           |         |          |          |           |
| -                                | 1963488                  | a                       | 2160991                 | y                        | 1927479                  | ns                | Sakai/EDL933               | rec35               | a                                    | EDL933                               | +                          |          |      |    |           |         |       |         |          | a   |      |        |     |         |       |         |      |      |         |           |         |          |          |           |
| -                                | 1963488                  | t                       | 2161003                 | r                        | 1927467                  | ns                | Sakai/EDL933               | rec35               | t                                    | EDL933                               | +                          |          |      |    |           |         |       |         |          | t   |      |        |     |         |       |         |      |      |         |           |         |          |          |           |
| -                                | 1963488                  | c                       | 2161015                 | r                        | 1927455                  | ns                | Sakai/EDL933               | rec35               | c                                    | EDL933                               | ++++                       |          |      |    |           |         |       |         |          | t   |      |        |     |         |       |         |      |      |         |           |         |          |          |           |
| -                                | 1963488                  | t                       | 2161038                 | V                        | 1927432                  | ns                | Sakai/EDL933               | rec35               | t                                    | EDL933                               | +                          |          |      |    |           |         |       |         |          | t   |      |        |     |         |       |         |      |      |         |           |         |          |          |           |
| -                                | 1963488                  | g                       | 2161066                 | Y                        | 1927404                  | ns                | Sakai/EDL933               | rec35               | g                                    | EDL933                               | +                          |          |      |    |           |         |       |         |          | g   |      |        |     |         |       |         |      |      |         |           |         |          |          |           |
| -                                | 1963488                  | t                       | 2161083                 | g                        | 1927387                  | ns                | Sakai/EDL933               | rec35               | g                                    | Sakai                                | +                          |          |      |    |           |         |       |         |          | g   |      |        |     |         |       |         |      |      |         |           |         |          |          |           |
| -                                | 1963488                  | a                       | 2161092                 | g                        | 1927378                  | s                 | Sakai/EDL933               | rec35               | a                                    | EDL933                               | +                          |          |      |    |           |         |       |         |          | a   |      |        |     |         |       |         |      |      |         |           |         |          |          |           |
| -                                | 1963488                  | c                       | 2161142                 | k                        | 1927328                  | ns                | Sakai/EDL933               | rec35               | c                                    | EDL933                               | +                          |          |      |    |           |         |       |         |          | c   |      |        |     |         |       |         |      |      |         |           |         |          |          |           |
| -                                | 1963488                  | c                       | 2161219                 | r                        | 1927251                  | ns                | Sakai/EDL933               | rec35               | c                                    | EDL933                               | +                          |          |      |    |           |         |       |         |          | c   |      |        |     |         |       |         |      |      |         |           |         |          |          |           |
| -                                | 1963488                  | t                       | 2161230                 | m                        | 1927240                  | ns                | Sakai/EDL933               | rec35               | t                                    | EDL933                               | +                          |          |      |    |           |         |       |         |          | t   |      |        |     |         |       |         |      |      |         |           |         |          |          |           |
| -                                | 1963488                  | t                       | 2161256                 | c                        | 1927214                  | s                 | Sakai/EDL933               | rec35               | t                                    | EDL933                               | +                          |          |      |    |           |         |       |         |          | t   |      |        |     |         |       |         |      |      |         |           |         |          |          |           |
| -                                | 1963488                  | g                       | 2161259                 | y                        | 1927211                  | ns                | Sakai/EDL933               | rec35               | g                                    | EDL933                               | +                          |          |      |    |           |         |       |         |          | g   |      |        |     |         |       |         |      |      |         |           |         |          |          |           |
| -                                | 1963488                  | t                       | 2161269                 | r                        | 1927201                  | ns                | Sakai/EDL933               | rec35               | t                                    | EDL933                               | +                          |          |      |    |           |         |       |         |          | t   |      |        |     |         |       |         |      |      |         |           |         |          |          |           |
| -                                | 1963488                  | g                       | 2161285                 | m                        | 1927185                  | ns                | Sakai/EDL933               | rec35               | g                                    | EDL933                               | ++++                       |          |      |    |           |         |       |         |          | t   |      |        |     |         |       |         |      |      |         |           |         |          |          |           |
| -                                | 1963488                  | t                       | 2161305                 | c                        | 1927165                  | ns                | Sakai/EDL933               | rec35               | c                                    | Sakai                                | +                          |          |      |    |           |         |       |         |          | c   |      |        |     |         |       |         |      |      |         |           |         |          |          |           |
| -                                | 1963488                  | t                       | 2161307                 | c                        | 1927163                  | ns                | Sakai/EDL933               | rec35               | c                                    | Sakai                                | +                          |          |      |    |           |         |       |         |          | c   |      |        |     |         |       |         |      |      |         |           |         |          |          |           |
| -                                | 1963488                  | c                       | 2161308                 | g                        | 1927162                  | ns                | Sakai/EDL933               | rec35               | g                                    | Sakai                                | +                          |          |      |    |           |         |       |         |          | g   |      |        |     |         |       |         |      |      |         |           |         |          |          |           |
| -                                | 1963488                  | g                       | 2161322                 | a                        | 1927148                  | s                 | Sakai/EDL933               | rec35               | a                                    | Sakai                                | +                          |          |      |    |           |         |       |         |          | a   |      |        |     |         |       |         |      |      |         |           |         |          |          |           |
| -                                | 1963488                  | c                       | 2161325                 | a                        | 1927145                  | s                 | Sakai/EDL933               | rec35               | a                                    | Sakai                                | +                          |          |      |    |           |         |       |         |          | a   |      |        |     |         |       |         |      |      |         |           |         |          |          |           |
| -                                | 1963488                  | t                       | 2161328                 | g                        | 1927142                  | s                 | Sakai/EDL933               | rec35               | g                                    | Sakai                                | +                          |          |      |    |           |         |       |         |          | g   |      |        |     |         |       |         |      |      |         |           |         |          |          |           |
| -                                | 1963488                  | c                       | 2161334                 | t                        | 1927136                  | s                 | Sakai/EDL933               | rec35               | t                                    | Sakai                                | +                          |          |      |    |           |         |       |         |          | t   |      |        |     |         |       |         |      |      |         |           |         |          |          |           |
| -                                | 1963488                  | c                       | 2161358                 | t                        | 1927112                  | s                 | Sakai/EDL933               | rec35               | t                                    | Sakai                                | +                          |          |      |    |           |         |       |         |          | t   |      |        |     |         |       |         |      |      |         |           |         |          |          |           |
| -                                | 1963488                  | g                       | 2188677                 | M                        | 1894043                  | i                 | Sakai/EDL933               | rec35               |                                      |                                      |                            |          |      |    |           |         |       |         |          |     |      |        |     |         |       |         |      |      |         |           |         |          |          |           |









































Page 35

| O55 and O157 genome site details |                          |                          |                         |                         |                          |                          |                   |                             |                     | Outgroup Strain Details <sup>1</sup> |                                |                              |          |      |    |           |        |       |         |          |     |      |        |     |         |       |         |     |      |         |           |         |          |          |           |   |   |   |   |
|----------------------------------|--------------------------|--------------------------|-------------------------|-------------------------|--------------------------|--------------------------|-------------------|-----------------------------|---------------------|--------------------------------------|--------------------------------|------------------------------|----------|------|----|-----------|--------|-------|---------|----------|-----|------|--------|-----|---------|-------|---------|-----|------|---------|-----------|---------|----------|----------|-----------|---|---|---|---|
|                                  | CB9615 base <sup>b</sup> | CB9615 Site <sup>c</sup> | Sakai base <sup>b</sup> | Sakai Site <sup>c</sup> | EDL933 base <sup>b</sup> | EDL933 Site <sup>c</sup> | type <sup>d</sup> | Event Lineage <sup>ad</sup> | Recombinant segment | Inferred ancestral base <sup>g</sup> | Outgroup Analysis <sup>e</sup> | Support level <sup>h,i</sup> | D1 Sd197 | K-12 | HS | ATCC 8739 | UMN026 | IA139 | SMS 3-5 | E2348/69 | 536 | ED1a | CF7073 | S88 | APEC O1 | UT189 | E24377A | IA1 | SE11 | F5 8401 | F2a 2457T | F2a 301 | SS Ss046 | B4 Ss027 | B18 BSS12 |   |   |   |   |
| a                                | 2623335                  | c                        | 2842452                 | c                       | 2912670                  | s                        | O157              | rec46                       | a                   | O157                                 | CB9615                         | ++                           | a        | c    | a  | c         | c      | c     | c       | c        | c   | c    | c      | c   | c       | c     | c       | c   | c    | c       | c         | c       | c        | a        | c         | c |   |   |   |
| t                                | 2623434                  | t                        | 2842551                 | t                       | 2912769                  | nc                       | O157              | rec46                       | t                   | O157                                 | CB9615                         | ++++                         | t        | t    | t  | t         | t      | t     | t       | t        | t   | t    | t      | t   | t       | t     | t       | t   | t    | t       | t         | t       | t        | t        | t         | c |   |   |   |
| g                                | 2623539                  | a                        | 2842656                 | a                       | 2912874                  | i                        | O157              | rec46                       | g                   | O157                                 | O157                           | ++                           | g        | g    | g  | g         | g      | g     | g       | g        | g   | g    | g      | g   | g       | g     | g       | g   | g    | g       | a         | a       | a        | g        | g         | g |   |   |   |
| c                                | 2623541                  | a                        | 2842658                 | a                       | 2912876                  | ns                       | O157              | rec46                       | c                   | O157                                 | O157                           | ++                           | c        | a    | a  | a         | a      | a     | a       | a        | a   | a    | c      | c   | c       | c     | c       | c   | c    | c       | c         | c       | c        | c        | c         | a | c | c |   |
| a                                | 2623564                  | g                        | 2842681                 | g                       | 2912899                  | s                        | O157              | rec46                       | g                   | CB9615                               | CB9615                         | ++++                         | g        | g    | g  | g         | g      | g     | g       | g        | g   | g    | g      | g   | g       | g     | g       | g   | g    | g       | g         | g       | g        | g        | g         | g | g |   |   |
| a                                | 2623599                  | g                        | 2842716                 | g                       | 2912934                  | ns                       | O157              | rec46                       | g                   | CB9615                               | CB9615                         | ++++                         | g        | t    | t  | t         | g      | t     | t       | t        | t   | t    | t      | t   | t       | t     | t       | t   | t    | t       | t         | t       | t        | t        | t         | t | t |   |   |
| c                                | 2623618                  | a                        | 2842735                 | a                       | 2912953                  | ns                       | O157              | rec46                       | a                   | CB9615                               | CB9615                         | ++                           | a        | a    | a  | a         | a      | a     | a       | a        | a   | a    | a      | a   | a       | a     | a       | a   | a    | a       | a         | a       | a        | a        | a         | a | a |   |   |
| c                                | 2623632                  | a                        | 2842749                 | a                       | 2912967                  | ns                       | O157              | rec46                       | a                   | CB9615                               | CB9615                         | ++                           | a        | c    | c  | c         | c      | c     | c       | c        | c   | c    | c      | c   | c       | c     | c       | c   | c    | c       | c         | c       | c        | c        | c         | c | c |   |   |
| c                                | 2623638                  | a                        | 2842755                 | a                       | 2912973                  | s                        | O157              | rec46                       | a                   | CB9615                               | CB9615                         | ++                           | a        | g    | g  | g         | a      | g     | g       | g        | g   | g    | g      | g   | g       | g     | g       | g   | g    | a       | a         | a       | g        | g        | a         | g | a | g |   |
| g                                | 2623653                  | t                        | 2842770                 | t                       | 2912988                  | ns                       | O157              | rec46                       | t                   | CB9615                               | CB9615                         | ++++                         | t        | t    | t  | t         | t      | t     | t       | t        | t   | t    | t      | t   | t       | t     | t       | t   | t    | t       | t         | t       | t        | t        | t         | t | t | g |   |
| g                                | 2623902                  | a                        | 2843019                 | a                       | 2913237                  | s                        | O157              | rec46                       | a                   | CB9615                               | CB9615                         | ++                           | a        | a    | a  | a         | a      | g     | g       | g        | g   | g    | g      | g   | g       | a     | a       | a   | a    | a       | a         | a       | a        | a        | a         | a | a | a |   |
| t                                | 2623913                  | c                        | 2843030                 | c                       | 2913248                  | ns                       | O157              | rec46                       | c                   | CB9615                               | CB9615                         | ++++                         | c        | c    | c  | c         | c      | c     | c       | c        | c   | c    | c      | c   | c       | c     | c       | c   | c    | c       | c         | c       | c        | c        | c         | c | c | c |   |
| g                                | 2623989                  | t                        | 2843106                 | t                       | 2913324                  | ns                       | O157              | rec46                       | t                   | CB9615                               | CB9615                         | ++++                         | t        | t    | t  | t         | t      | t     | t       | t        | t   | t    | t      | t   | t       | t     | t       | t   | t    | t       | t         | t       | t        | t        | t         | t | t | t |   |
| c                                | 2623994                  | t                        | 2843111                 | t                       | 2913329                  | ns                       | O157              | rec46                       | t                   | CB9615                               | CB9615                         | ++                           | t        | t    | t  | t         | t      | t     | t       | t        | t   | t    | t      | t   | t       | t     | t       | t   | t    | t       | t         | t       | t        | t        | t         | t | t | t |   |
| c                                | 2624095                  | a                        | 2843212                 | a                       | 2913430                  | i                        | O157              | rec46                       | c                   | O157                                 | CB9615                         | ++++                         | c        | c    | c  | c         | c      | c     | c       | c        | c   | c    | c      | c   | c       | c     | c       | c   | c    | c       | c         | c       | c        | c        | c         | c | c | c |   |
| g                                | 2624155                  | a                        | 2843272                 | a                       | 2913490                  | i                        | O157              | rec46                       | g                   | O157                                 | O157                           | ++++                         | -        | g    | g  | g         | g      | g     | g       | g        | g   | g    | g      | g   | g       | g     | g       | g   | g    | g       | g         | g       | g        | g        | g         | g | - | g |   |
| t                                | 2624180                  | a                        | 2843297                 | a                       | 2913515                  | i                        | O157              | rec46                       | t                   | O157                                 | O157                           | ++++                         | t        | t    | t  | t         | t      | t     | t       | t        | t   | t    | t      | t   | t       | t     | t       | t   | t    | t       | t         | t       | t        | t        | t         | t | t | t |   |
| g                                | 2624191                  | a                        | 2843308                 | a                       | 2913526                  | i                        | O157              | rec46                       | g                   | O157                                 | O157                           | ++                           | g        | a    | a  | a         | a      | a     | a       | a        | a   | a    | a      | a   | a       | a     | a       | a   | a    | a       | a         | a       | a        | a        | a         | a | a | g | a |
| c                                | 2624205                  | t                        | 2843322                 | t                       | 2913540                  | i                        | O157              | rec46                       | c                   | O157                                 | O157                           | ++                           | c        | t    | t  | t         | t      | t     | t       | t        | t   | t    | t      | t   | t       | t     | t       | t   | t    | t       | t         | c       | t        | t        | t         | t | c | t |   |
| a                                | 2624237                  | g                        | 2843354                 | g                       | 2913572                  | i                        | O157              | rec46                       | a                   | O157                                 | O157                           | ++                           | a        | g    | g  | g         | a      | a     | a       | a        | a   | a    | a      | a   | a       | a     | a       | a   | g    | g       | g         | g       | g        | g        | g         | g | a | a |   |
| a                                | 2624244                  | g                        | 2843361                 | g                       | 2913579                  | i                        | O157              | rec46                       | a                   | O157                                 | O157                           | ++                           | a        | g    | g  | g         | a      | a     | a       | a        | a   | a    | a      | a   | a       | a     | a       | a   | g    | g       | g         | g       | g        | g        | g         | g | a | a |   |
| c                                | 2624255                  | c                        | 2843372                 | c                       | 2913590                  | i                        | O157              | rec46                       | t                   | O157                                 | O157                           | ++                           | t        | c    | c  | c         | c      | c     | c       | c        | c   | c    | c      | c   | c       | c     | c       | t   | t    | c       | c         | c       | c        | c        | c         | c | t | t |   |
| t                                | 2624291                  | t                        | 2843408                 | t                       | 2913626                  | i                        | O157              | rec46                       | c                   | O157                                 | O157                           | ++                           | c        | t    | t  | t         | -      | -     | -       | -        | -   | -    | -      | -   | -       | -     | -       | t   | t    | t       | t         | t       | t        | t        | t         | t | t | t |   |
| t                                | 2624309                  | a                        | 2843426                 | a                       | 2913644                  | i                        | O157              | rec46                       | t                   | O157                                 | O157                           | ++++                         | t        | t    | t  | t         | t      | t     | t       | t        | t   | t    | t      | t   | t       | t     | t       | t   | t    | t       | t         | t       | t        | t        | t         | t | t | t |   |
| t                                | 2624315                  | c                        | 2843432                 | c                       | 2913650                  | i                        | O157              | rec46                       | c                   | CB9615                               | CB9615                         | ++++                         | c        | c    | c  | c         | c      | c     | c       | c        | c   | c    | c      | c   | c       | c     | c       | c   | c    | c       | c         | c       | c        | c        | c         | c | c | c |   |
| c                                | 2624372                  | t                        | 2843489                 | t                       | 2913707                  | i                        | O157              | rec46                       | c                   | O157                                 | O157                           | ++++                         | c        | c    | c  | c         | c      | c     | c       | c        | c   | c    | c      | c   | c       | c     | c       | c   | c    | c       | c         | c       | c        | c        | c         | c | c | c |   |
| t                                | 2624454                  | c                        | 2843571                 | c                       | 2913789                  | s                        | O157              | rec46                       | t                   | O157                                 | O157                           | ++                           | t        | c    | c  | c         | t      | c     | c       | c        | c   | c    | c      | c   | c       | c     | c       | c   | c    | c       | c         | c       | c        | c        | c         | c | c | c |   |
| a                                | 2624459                  | c                        | 2843576                 | c                       | 2913794                  | s                        | O157              | rec46                       | a                   | O157                                 | O157                           | ++                           | a        | c    | c  | c         | a      | c     | c       | c        | c   | c    | c      | c   | c       | c     | c       | c   | c    | c       | c         | c       | c        | c        | c         | c | c | c |   |
| a                                | 2624649                  | g                        | 2843766                 | g                       | 2913984                  | ns                       | O157              | rec46                       | g                   | CB9615                               | CB9615                         | ++++                         | g        | g    | g  | g         | g      | g     | g       | g        | g   | g    | g      | g   | g       | g     | g       | g   | g    | g       | g         | g       | g        | g        | g         | g | g | g |   |
| a                                | 2624735                  | g                        | 2843852                 | g                       | 2914070                  | s                        | O157              | rec46                       | g                   | CB9615                               | CB9615                         | ++++                         | g        | g    | g  | g         | g      | g     | g       | g        | g   | g    | g      | g   | g       | g     | g       | g   | g    | g       | g         | g       | g        | g        | g         | g | g | g |   |
| g                                | 2624825                  | a                        | 2843942                 | a                       | 2914160                  | s                        | O157              | rec46                       | a                   | CB9615                               | CB9615                         | ++                           | a        | a    | a  | a         | a      | a     | a       | a        | a   | a    | g      | a   | a       | a     | a       | a   | a    | a       | a         | a       | a        | a        | a         | a | a | a |   |
| c                                | 2625288                  | t                        | 2844405                 | t                       | 2914623                  | s                        | O157              | rec46                       | t                   | CB9615                               | CB9615                         | ++                           | t        | c    | c  | c         | t      | t     | t       | t        | t   | t    | t      | t   | t       | t     | t       | t   | t    | t       | t         | t       | t        | t        | t         | t | t | t |   |
| g                                | 2625290                  | a                        | 2844407                 | g                       | 2914625                  | s                        | O157              | rec46                       | a                   | CB9615                               | CB9615                         | ++                           | a        | g    | g  | g         | a      | a     | a       | g        | g   | g    | g      | g   | g       | g     | g       | g   | g    | a       | a         | a       | a        | a        | a         | a | a | a |   |
| g                                | 2635066                  | a                        | 2844543                 | a                       | 2914761                  | s                        | O157              | rec46                       | a                   | CB9615                               | CB9615                         | ++++                         | a        | a    | a  | g         | a      | a     | a       | a        | a   | a    | a      | a   | a       | a     | a       | a   | a    | a       | a         | a       | a        | a        | a         | a | a | a |   |
| c                                | 2635072                  | c                        | 2844549                 | c                       | 2914767                  | ns                       | O157              | rec46                       | a                   | CB9615                               | CB9615                         | ++                           | a        | c    | c  | c         | c      | c     | c       | c        | c   | c    | c      | c   | c       | c     | c       | c   | c    | c       | c         | c       | c        | c        | c         | c | c | c |   |
| a                                | 2635081                  | g                        | 2844558                 | g                       | 2914776                  | s                        | O157              | rec46                       | g                   | CB9615                               | CB9615                         | ++                           | g        | a    | a  | c         | a      | c     | g       | a        | c   | a    | a      | a   | a       | a     | a       | a   | a    | a       | a         | a       | a        | a        | a         | a | a | a | a |
| g                                | 2635558                  | a                        | 2845035                 | a                       | 2915253                  | s                        | O157              | rec46                       | g                   | O157                                 | O157                           | ++++                         | g        | g    | g  | g         | g      | g     | g       | g        | g   | g    | g      | g   | g       | g     | g       | g   | g    | g       | g         | g       | g        | g        | g         | g | g | g | g |
| g                                | 2635612                  | a                        | 2845089                 | a                       | 2915307                  | s                        | O157              | rec46                       | a                   | CB9615                               | CB9615                         | ++                           | a        | a    | a  | g         | g      | g     | g       | g        | g   | g    | g      | g   | g       | g     | g       | g   | g    | g       | g         | g       | g        | g        | g         | g | g | g | g |
| t                                | 2635645                  | c                        | 2845122                 | c                       | 2915340                  | s                        | O157              | rec46                       | c                   | CB9615                               | CB9615                         | ++++                         | c        | c    | c  | c         | c      | c     | c       | c        | c   | c    | c      | c   | c       | c     | c       | c   | c    | c       | c         | c       | c        | c        | c         | c | c | c |   |
| a                                | 2635968                  | t                        | 2845445                 | t                       | 2915663                  | ns                       | O157              | rec46                       | t                   | CB9615                               | CB9615                         | ++++                         | t        | t    | t  | t         | a      | t     | t       | t        | t   | t    | t      | t   | t       | t     | t       | t   | t    | t       | t         | t       | t        | t        | t         | t | t | t |   |
| c                                | 2636161                  | g                        | 2845638                 | g                       | 2915856                  | s                        | O157              | rec46                       | g                   | CB9615                               | CB9615                         | ++++                         | g        | g    | g  | g         | g      | g     | g       | g        | g   | g    | g      | g   | g       | g     | g       | g   | g    | g       | g         | g       | g        | g        | g         | g | g | g | g |
| c                                | 2636170                  | t                        | 2845647                 | t                       | 2915865                  | s                        | O157              | rec46                       | c                   | O157                                 | O157                           | ++++                         | c        | c    | c  | c         | c      | c     | c       | c        | c   | c    | c      | c   | c       | c     | c       | c   | c    | c       | c         | c       | c        | c        | c         | c | c | c |   |
| c                                | 2636212                  | g                        | 2845689                 | g                       | 2915907                  | s                        | O157              | rec46                       | g                   | CB9615                               | CB9615                         | ++++                         | g        | g    | g  | g         | g      | g     | g       | g        | g   | g    | g      | g   | g       | g     | g       | g   | g    | g       | g         | g       | g        | g        | g         | g | g | g | g |
| c                                | 2636263                  | t                        | 2845740                 | t                       | 2915958                  | s                        | O157              | rec46                       | t                   | CB9615                               | CB9615                         | ++                           | t        | t    | t  | t         | c      | c     | c       | c        | c   | c    | a      | c   | c       | c     | t       | t   | t    | t       | t         | t       | t        | t        | t         | t | t | t | t |
| c                                | 2636277                  | t                        | 2845754                 | t                       | 2915972                  | ns                       | O157              | rec46                       | t                   | CB9615                               | CB9615                         | ++                           | t        | t    | t  | t         | c      | c     | c       | c        | c   | c    | c      | c   | c       | c     | c       | c   | t    | t       | t         | t       | t        | t        | t         | t | t | t |   |
| c                                | 2636371                  | a                        | 2845848                 | a                       | 2916066                  | s                        | O157              | rec46                       | a                   | CB9615                               | CB9615                         | ++                           | a        | c    | c  | c         | a      | a     | a       | a        | a   | a    | a      | a   | a       | a     | a       | a   | a    | a       | a         | a       | a        | a        | a         | a | a | a |   |
| t                                | 2636509                  | c                        | 2845986                 | c                       | 2916204                  | s                        | O157              | rec46                       | t                   | O157                                 | O157                           | ++                           | t        | t    | c  | c         | c      | t     | t       | t        | t   | t    | t      | c   | c       | c     | a       | c   | t    | c       | c         | c       | c        | c        | c         | c | c | c | c |
| c                                | 2636566                  | t                        | 2846043                 | t                       | 2916261                  | s                        | O157              | rec46                       | t                   | CB9615                               | CB9615                         | ++                           | t        | t    | t  | t         | t      | t     | t       | t        | t   | t    | t      | t   | t       | t     | t       | t   | t    | t       | t         | t       | t        | t        | t         | t | t | t |   |
| g                                | 2636655                  | a                        | 2846132                 | a                       | 2916350                  | s                        | O157              | rec46                       | g                   | O157                                 | O157                           | ++                           | g        | g    | g  | g         | a      | g     | g       | g        | g   | g    | g      | g   | g       | a     | a       | a   | a    | a       | a         | a       | a        | a        | a         | a | a | g | g |
| a                                | 2636713                  | g                        | 2846190                 | g                       | 2                        |                          |                   |                             |                     |                                      |                                |                              |          |      |    |           |        |       |         |          |     |      |        |     |         |       |         |     |      |         |           |         |          |          |           |   |   |   |   |



Page 37

| O55 and O157 genome site details |                          |                         |                         |                          |                          |                   |                             |                     |                                      | Outgroup Strain Details        |                            |          |      |    |           |         |       |         |          |     |      |        |     |         |       |         |     |      |         |           |         |          |          |           |
|----------------------------------|--------------------------|-------------------------|-------------------------|--------------------------|--------------------------|-------------------|-----------------------------|---------------------|--------------------------------------|--------------------------------|----------------------------|----------|------|----|-----------|---------|-------|---------|----------|-----|------|--------|-----|---------|-------|---------|-----|------|---------|-----------|---------|----------|----------|-----------|
|                                  |                          |                         |                         |                          |                          |                   |                             |                     |                                      |                                |                            |          |      |    |           |         |       |         |          |     |      |        |     |         |       |         |     |      |         |           |         |          |          |           |
| CB9615 base <sup>b</sup>         | CB9615 Site <sup>c</sup> | Sakai base <sup>b</sup> | Sakai Site <sup>c</sup> | EDL933 base <sup>b</sup> | EDL933 Site <sup>c</sup> | type <sup>d</sup> | Event Lineage <sup>ad</sup> | Recombinant segment | Inferred ancestral base <sup>g</sup> | Outgroup Analysis <sup>e</sup> | Support level <sup>h</sup> | D1 Sd197 | K-12 | HS | ATCC 8739 | UHMN026 | IA139 | SMS 3-5 | E2348/69 | 536 | ED1a | CFT073 | S88 | APEC O1 | UT189 | E24377A | IA1 | SE11 | F3 8401 | F2a 2457T | F2a 301 | SS Ss046 | B4 Ss227 | B18 BSS12 |
| g                                | 2645136                  | a                       | 2854605                 | t                        | 2924824                  | s                 | O157                        | rec46               | a                                    | CB9615                         | ++                         | a        | a    | a  | a         | g       | g     | g       | g        | g   | g    | g      | g   | g       | g     | a       | a   | a    | a       | a         | a       | a        | a        | a         |
| c                                | 2645142                  | t                       | 2854611                 | t                        | 2924830                  | s                 | O157                        | rec46               | t                                    | CB9615                         | ++                         | t        | t    | t  | t         | c       | c     | c       | c        | c   | c    | c      | c   | c       | c     | a       | a   | a    | a       | a         | a       | a        | a        | a         |
| t                                | 2645156                  | c                       | 2854625                 | c                        | 2924844                  | ns                | O157                        | rec46               | c                                    | CB9615                         | ++                         | c        | c    | c  | c         | c       | c     | c       | c        | c   | c    | c      | c   | c       | c     | t       | c   | c    | c       | c         | c       | c        | c        | c         |
| g                                | 2645159                  | c                       | 2854628                 | c                        | 2924847                  | ns                | O157                        | rec46               | t                                    | O157                           | ++++                       | t        | t    | t  | t         | t       | t     | t       | t        | t   | t    | t      | t   | t       | t     | t       | t   | t    | t       | t         | t       | t        | t        | t         |
| t                                | 2645216                  | t                       | 2854685                 | t                        | 2924904                  | s                 | O157                        | rec46               | g                                    | O157                           | ++                         | g        | g    | g  | g         | g       | g     | g       | g        | g   | g    | g      | g   | g       | g     | g       | g   | g    | g       | g         | g       | g        | g        | g         |
| c                                | 2645222                  | g                       | 2854691                 | g                        | 2924910                  | s                 | O157                        | rec46               | c                                    | O157                           | ++                         | c        | c    | c  | c         | c       | c     | c       | c        | c   | c    | c      | c   | c       | c     | c       | c   | c    | c       | c         | c       | c        | c        | c         |
| g                                | 2645223                  | a                       | 2854692                 | a                        | 2924911                  | ns                | O157                        | rec46               | g                                    | O157                           | ++                         | g        | g    | g  | g         | g       | g     | g       | g        | g   | g    | g      | g   | g       | g     | g       | g   | g    | g       | g         | g       | g        | g        | g         |
| c                                | 2645225                  | t                       | 2854694                 | t                        | 2924913                  | ns                | O157                        | rec46               | c                                    | O157                           | ++                         | c        | c    | c  | c         | c       | c     | c       | c        | c   | c    | c      | c   | c       | c     | c       | c   | c    | c       | c         | c       | c        | c        | c         |
| g                                | 2645234                  | a                       | 2854703                 | a                        | 2924922                  | s                 | O157                        | rec46               | g                                    | O157                           | ++++                       | g        | g    | g  | g         | g       | g     | g       | g        | g   | g    | g      | g   | g       | g     | g       | g   | g    | g       | g         | g       | g        | g        | g         |
| c                                | 2645243                  | t                       | 2854712                 | t                        | 2924931                  | s                 | O157                        | rec46               | t                                    | CB9615                         | ++                         | t        | c    | t  | c         | t       | t     | t       | t        | t   | t    | t      | t   | t       | t     | c       | c   | c    | c       | c         | c       | c        | c        | c         |
| t                                | 2645375                  | c                       | 2854844                 | c                        | 2925063                  | s                 | O157                        | rec46               | t                                    | O157                           | ++++                       | t        | t    | t  | t         | t       | t     | t       | t        | t   | t    | t      | t   | t       | t     | t       | t   | t    | t       | t         | t       | t        | t        | t         |
| g                                | 2645396                  | c                       | 2854865                 | c                        | 2925084                  | s                 | O157                        | rec46               | c                                    | CB9615                         | ++                         | c        | c    | c  | c         | c       | g     | g       | g        | g   | g    | g      | g   | g       | g     | c       | c   | c    | c       | c         | c       | c        | c        | g         |
| a                                | 2645399                  | g                       | 2854868                 | g                        | 2925087                  | s                 | O157                        | rec46               | g                                    | CB9615                         | ++                         | g        | g    | g  | g         | g       | g     | g       | g        | g   | g    | g      | g   | g       | g     | g       | g   | g    | g       | g         | g       | g        | g        | a         |
| c                                | 2645438                  | c                       | 2854907                 | c                        | 2925126                  | s                 | O157                        | rec46               | c                                    | CB9615                         | ++                         | c        | c    | g  | c         | g       | c     | c       | c        | c   | c    | c      | c   | c       | c     | c       | c   | c    | c       | c         | c       | c        | c        | g         |
| a                                | 2645463                  | g                       | 2854932                 | g                        | 2925151                  | ns                | O157                        | rec46               | g                                    | CB9615                         | ++++                       | g        | g    | g  | g         | g       | g     | g       | g        | g   | g    | g      | g   | g       | g     | g       | g   | g    | g       | g         | g       | g        | g        | g         |
| c                                | 2645483                  | t                       | 2854952                 | t                        | 2925171                  | s                 | O157                        | rec46               | t                                    | CB9615                         | ++++                       | t        | t    | t  | t         | t       | t     | t       | t        | t   | t    | t      | t   | t       | t     | t       | t   | t    | t       | t         | t       | t        | t        | t         |
| t                                | 2645717                  | g                       | 2855186                 | g                        | 2925405                  | ns                | O157                        | rec46               | g                                    | CB9615                         | ++                         | g        | t    |    |           |         |       |         |          |     |      |        |     |         |       |         |     |      |         |           |         |          |          |           |



Table S4. Allocation of recombinational SNPs to lineages by virtual outgroup analysis<sup>a</sup>

[illegible]

Table S4. Allocation of recombinational SNPs to lineages by virtual outgroup analysis<sup>a</sup>[illegible]





| O55 and O157 genome site details |                          |                         |                         |                          |                          |                   |                            |                     |                                      | Outgroup Strain Details <sup>i</sup> |                            |          |      |    |           |         |       |         |          |     |      |        |     |         |       |         |      |      |         |           |         |          |          |           |
|----------------------------------|--------------------------|-------------------------|-------------------------|--------------------------|--------------------------|-------------------|----------------------------|---------------------|--------------------------------------|--------------------------------------|----------------------------|----------|------|----|-----------|---------|-------|---------|----------|-----|------|--------|-----|---------|-------|---------|------|------|---------|-----------|---------|----------|----------|-----------|
| CB9615 base <sup>b</sup>         | CB9615 Site <sup>c</sup> | Sakai base <sup>a</sup> | Sakai Site <sup>c</sup> | EDL933 base <sup>b</sup> | EDL933 Site <sup>c</sup> | type <sup>d</sup> | Event Lineage <sup>e</sup> | Recombinant segment | Inferred ancestral base <sup>g</sup> | Outgroup Analysis <sup>h</sup>       | Support level <sup>h</sup> | D1 Sc197 | K-12 | HS | ATCC 8739 | UJMN026 | IA139 | SMS 3-5 | E2348/69 | 536 | ED1a | CFT073 | S88 | APEC O1 | UT189 | E24377A | IA11 | SE11 | F5 8401 | F2a 2457T | F2a 301 | SS Ss046 | B4 Sb227 | B18 BS512 |
| a                                | 2657026                  | c                       | 2866503                 | c                        | 2936734                  | nc                | O157                       | rec46               | a                                    | O157                                 | ++++                       | a        | a    | a  | a         | a       | a     | a       | a        | a   | a    | a      | a   | a       | a     | a       | a    | a    | a       | a         | a       | a        | a        | a         |
| t                                | 2657028                  | a                       | 2866505                 | a                        | 2936736                  | nc                | O157                       | rec46               | t                                    | O157                                 | ++++                       | t        | t    | t  | t         | t       | t     | t       | t        | t   | t    | t      | t   | t       | t     | t       | t    | t    | t       | t         | t       | t        | t        | t         |
| c                                | 2657034                  | t                       | 2866511                 | t                        | 2936742                  | nc                | O157                       | rec46               | c                                    | O157                                 | ++++                       | c        | c    | c  | c         | c       | c     | c       | c        | c   | c    | c      | c   | c       | c     | c       | c    | c    | c       | c         | c       | c        | c        | c         |
| a                                | 2657035                  | t                       | 2866512                 | t                        | 2936743                  | nc                | O157                       | rec46               | a                                    | O157                                 | ++++                       | a        | a    | a  | a         | a       | a     | a       | a        | a   | a    | a      | a   | a       | a     | a       | a    | a    | a       | a         | a       | a        | a        | a         |
| c                                | 2657038                  | t                       | 2866515                 | t                        | 2936746                  | nc                | O157                       | rec46               | c                                    | O157                                 | ++++                       | c        | c    | c  | c         | c       | c     | c       | c        | c   | c    | c      | c   | c       | c     | c       | c    | c    | c       | c         | c       | c        | c        | c         |
| g                                | 2657043                  | c                       | 2866520                 | c                        | 2936751                  | nc                | O157                       | rec46               | g                                    | O157                                 | ++++                       | g        | g    | g  | g         | g       | g     | g       | g        | g   | g    | g      | g   | g       | g     | g       | g    | g    | g       | g         | g       | g        | g        | g         |
| g                                | 2657044                  | a                       | 2866521                 | a                        | 2936752                  | nc                | O157                       | rec46               | g                                    | O157                                 | ++++                       | g        | g    | g  | g         | g       | g     | g       | g        | g   | g    | g      | g   | g       | g     | g       | g    | g    | g       | g         | g       | g        | g        | g         |
| t                                | 2657045                  | c                       | 2866522                 | c                        | 2936753                  | nc                | O157                       | rec46               | t                                    | O157                                 | ++++                       | t        | t    | t  | t         | t       | t     | t       | t        | t   | t    | t      | t   | t       | t     | t       | t    | t    | t       | t         | t       | t        | t        | t         |
| a                                | 2657056                  | t                       | 2866533                 | t                        | 2936764                  | nc                | O157                       | rec46               | a                                    | O157                                 | ++++                       | a        | a    | a  | a         | a       | a     | a       | a        | a   | a    | a      | a   | a       | a     | a       | a    | a    | a       | a         | a       | a        | a        | a         |
| t                                | 2657059                  | c                       | 2866536                 | c                        | 2936767                  | nc                | O157                       | rec46               | t                                    | O157                                 | ++++                       | t        | t    | t  | t         | t       | t     | t       | t        | t   | t    | t      | t   | t       | t     | t       | t    | t    | t       | t         | t       | t        | t        | t         |
| a                                | 2657074                  | g                       | 2866551                 | g                        | 2936782                  | nc                | O157                       | rec46               | a                                    | O157                                 | ++++                       | a        | a    | a  | a         | a       | a     | a       | a        | a   | a    | a      | a   | a       | a     | a       | a    | a    | a       | a         | a       | a        | a        | a         |
| a                                | 2657089                  | t                       | 2866566                 | t                        | 2936797                  | nc                | O157                       | rec46               | a                                    | O157                                 | ++++                       | a        | a    | a  | a         | a       | a     | a       | a        | a   | a    | a      | a   | a       | a     | a       | a    | a    | a       | a         | a       | a        | a        | a         |
| a                                | 2657097                  | g                       | 2866574                 | g                        | 2936805                  | nc                | O157                       | rec46               | a                                    | O157                                 | ++++                       | a        | a    | a  | a         | a       | a     | a       | a        | a   | a    | a      | a   | a       | a     | a       | a    | a    | a       | a         | a       | a        | a        | a         |
| a                                | 2657098                  | t                       | 2866575                 | t                        | 2936806                  | nc                | O157                       | rec46               | a                                    | O157                                 | ++++                       | a        | a    | a  | a         | a       | a     | a       | a        | a   | a    | a      | a   | a       | a     | a       | a    | a    | a       | a         | a       | a        | a        | a         |
| t                                | 2657122                  | g                       | 2866599                 | g                        | 2936830                  | nc                | O157                       | rec46               | t                                    | O157                                 | ++++                       | t        | t    | t  | t         | t       | t     | t       | t        | t   | t    | t      | t   | t       | t     | t       | t    | t    | t       | t         | t       | t        | t        | t         |
| g                                | 2657125                  | t                       | 2866602                 | t                        | 2936833                  | nc                | O157                       | rec46               | g                                    | O157                                 | ++++                       | g        | g    | g  | g         | g       | g     | g       | g        | g   | g    | g      | g   | g       | g     | g       | g    | g    | g       | g         | g       | g        | g        | g         |
| t                                | 2657140                  | c                       | 2866617                 | c                        | 2936848                  | nc                | O157                       | rec46               | t                                    | O157                                 | ++++                       | t        | t    | t  | t         | t       | t     | t       | t        | t   | t    | t      | t   | t       | t     | t       | t    | t    | t       | t         | t       | t        | t        | t         |
| g                                | 2657203                  | a                       | 2866680                 | a                        | 2936911                  | nc                | O157                       | rec46               | g                                    | O157                                 | ++++                       | g        | g    | g  | g         | g       | g     | g       | g        | g   | g    | g      | g   | g       | g     | g       | g    | g    | g       | g         | g       | g        | g        | g         |
| a                                | 2657221                  | t                       | 2866698                 | t                        | 2936929                  | nc                | O157                       | rec46               | a                                    | O157                                 | ++++                       | a        | a    | a  | a         | a       | a     | a       | a        | a   | a    | a      | a   | a       | a     | a       | a    | a    | a       | a         | a       | a        | a        | a         |
| a                                | 2657223                  | g                       | 2866700                 | g                        | 2936931                  | nc                | O157                       | rec46               | g                                    | CB9615                               | +                          | g        | g    | g  | a         | g       | g     | g       | g        | g   | g    | g      | g   | g       | g     | a       | a    | a    | a       | a         | a       | a        | a        | g         |
| t                                | 2657228                  | c                       | 2866705                 | c                        | 2936936                  | nc                | O157                       | rec46               | t                                    | O157                                 | ++++                       | t        | t    | t  | t         | t       | t     | t       | t        | t   | t    | t      | t   | t       | t     | t       | t    | t    | t       | t         | t       | t        | t        | t         |
| t                                | 2657229                  | c                       | 2866706                 | c                        | 2936937                  | nc                | O157                       | rec46               | t                                    | O157                                 | ++++                       | t        | t    | t  | t         | t       | t     | t       | t        | t   | t    | t      | t   | t       | t     | t       | t    | t    | t       | t         | t       | t        | t        | t         |
| t                                | 2657233                  | c                       | 2866710                 | c                        | 2936941                  | nc                | O157                       | rec46               | t                                    | O157                                 | +                          | t        | t    | t  | c         | c       | c     | t       | t        | t   | t    | t      | t   | t       | t     | t       | t    | t    | t       | t         | t       | t        | t        | t         |
| c                                | 2657243                  | t                       | 2866720                 | t                        | 2936951                  | nc                | O157                       | rec46               | c                                    | O157                                 | ++++                       | c        | c    | c  | c         | c       | c     | c       | c        | c   | c    | c      | c   | c       | c     | c       | c    | c    | c       | c         | c       | c        | c        | c         |
| g                                | 2657248                  | t                       | 2866725                 | t                        | 2936956                  | nc                | O157                       | rec46               | g                                    | O157                                 | ++++                       | g        | g    | g  | g         | g       | g     | g       | g        | g   | g    | g      | g   | g       | g     | g       | g    | g    | g       | g         | g       | g        | g        | g         |
| a                                | 2657249                  | t                       | 2866726                 | t                        | 2936957                  | nc                | O157                       | rec46               | a                                    | O157                                 | ++++                       | a        | a    | a  | a         | a       | a     | a       | a        | a   | a    | a      | a   | a       | a     | a       | a    | a    | a       | a         | a       | a        | a        | a         |
| t                                | 2657252                  | c                       | 2866729                 | c                        | 2936960                  | nc                | O157                       | rec46               | t                                    | O157                                 | ++++                       | t        | t    | t  | t         | t       | t     | t       | t        | t   | t    | t      | t   | t       | t     | t       | t    | t    | t       | t         | t       | t        | t        | t         |
| c                                | 2657258                  | t                       | 2866735                 | t                        | 2936966                  | nc                | O157                       | rec46               | c                                    | O157                                 | ++++                       | c        | c    | c  | c         | c       | c     | c       | c        | c   | c    | c      | c   | c       | c     | c       | c    | c    | c       | c         | c       | c        | c        | c         |
| a                                | 2657270                  | t                       | 2866747                 | t                        | 2936978                  | nc                | O157                       | rec46               | a                                    | O157                                 | ++++                       | a        | a    | a  | a         | a       | a     | a       | a        | a   | a    | a      | a   | a       | a     | a       | a    | a    | a       | a         | a       | a        | a        | a         |
| a                                | 2657271                  | g                       | 2866748                 | g                        | 2936979                  | nc                | O157                       | rec46               | a                                    | O157                                 | ++++                       | a        | a    | a  | a         | a       | a     | a       | a        | a   | a    | a      | a   | a       | a     | a       | a    | a    | a       | a         | a       | a        | a        | a         |
| g                                | 2657272                  | t                       | 2866749                 | t                        | 2936980                  | nc                | O157                       | rec46               | g                                    | O157                                 | ++++                       | g        | g    | g  | g         | g       | g     | g       | g        | g   | g    | g      | g   | g       | g     | g       | g    | g    | g       | g         | g       | g        | g        | g         |
| g                                | 2657275                  | t                       | 2866752                 | t                        | 2936983                  | nc                | O157                       | rec46               | g                                    | O157                                 | ++++                       | g        | g    | g  | g         | g       | g     | g       | g        | g   | g    | g      | g   | g       | g     | g       | g    | g    | g       | g         | g       | g        | g        | g         |
| a                                | 2657284                  | g                       | 2866761                 | g                        | 2936992                  | nc                | O157                       | rec46               | a                                    | O157                                 | ++++                       | a        | a    | a  | a         | a       | a     | a       | a        | a   | a    | a      | a   | a       | a     | a       | a    | a    | a       | a         | a       | a        | a        | a         |
| a                                | 2657287                  | t                       | 2866764                 | t                        | 2936995                  | nc                | O157                       | rec46               | a                                    | O157                                 | ++++                       | a        | a    | a  | a         | a       | a     | a       | a        | a   | a    | a      | a   | a       | a     | a       | a    | a    | a       | a         | a       | a        | a        | a         |
| g                                | 2657299                  | c                       | 2866776                 | c                        | 2937007                  | nc                | O157                       | rec46               | g                                    | O157                                 | ++++                       | g        | g    | g  | g         | g       | g     | g       | g        | g   | g    | g      | g   | g       | g     | g       | g    | g    | g       | g         | g       | g        | g        | g         |
| a                                | 2657305                  | g                       | 2866782                 | g                        | 2937013                  | nc                | O157                       | rec46               | g                                    | CB9615                               | +                          | g        | g    | g  | g         | g       | g     | g       | g        | g   | g    | g      | g   | g       | g     | a       | a    | a    | a       | a         | a       | a        | a        | g         |
| a                                | 2657308                  | g                       | 2866785                 | g                        | 2937016                  | nc                | O157                       | rec46               | a                                    | O157                                 | ++++                       | a        | a    | a  | a         | a       | a     | a       | a        | a   | a    | a      | a   | a       | a     | a       | a    | a    | a       | a         | a       | a        | a        | a         |
| t                                | 2657317                  | c                       | 2866794                 | c                        | 2937025                  | nc                | O157                       | rec46               | t                                    | O157                                 | ++++                       | t        | t    | t  | t         | t       | t     | t       | t        | t   | t    | t      | t   | t       | t     | t       | t    | t    | t       | t         | t       | t        | t        | t         |
| g                                | 2657320                  | a                       | 2866797                 | a                        | 2937028                  | nc                | O157                       | rec46               | g                                    | O157                                 | ++++                       | g        | g    | g  | g         | g       | g     | g       | g        | g   | g    | g      | g   | g       | g     | g       | g    | g    | g       | g         | g       | g        | g        | g         |
| c                                | 2657326                  | a                       | 2866803                 | a                        | 2937034                  | nc                | O157                       | rec46               | c                                    | O157                                 | ++++                       | c        | c    | c  | c         | c       | c     | c       | c        | c   | c    | c      | c   | c       | c     | c       | c    | c    | c       | c         | c       | c        | c        | c         |
| c                                | 2657335                  | t                       | 2866812                 | t                        | 2937043                  | nc                | O157                       | rec46               | c                                    | O157                                 | ++++                       | c        | c    | c  | c         | c       | c     | c       | c        | c   | c    | c      | c   | c       | c     | c       | c    | c    | c       | c         | c       | c        | c        | c         |
| a                                | 2657344                  | t                       | 2866821                 | t                        | 2937052                  | nc                | O157                       | rec46               | a                                    | O157                                 | +                          | a        | a    | a  | t         | t       | a     | a       | a        | a   | a    | a      | a   | a       | a     | a       | a    | a    | a       | a         | a       | a        | a        | a         |
| c                                | 2657346                  | g                       | 2866823                 | g                        | 2937054                  | nc                | O157                       | rec46               | c                                    | O157                                 | ++++                       | c        | c    | c  | c         | c       | c     | c       | c        | c   | c    | c      | c   | c       | c     | c       | c    | c    | c       | c         | c       | c        | c        | c         |
| t                                | 2657347                  | c                       | 2866824                 | c                        | 2937055                  | nc                | O157                       | rec46               | t                                    | O157                                 | ++++                       | t        | t    | t  | t         | t       | t     | t       | t        | t   | t    | t      | t   | t       | t     | t       | t    | t    | t       | t         | t       | t        | t        | t         |
| c                                | 2657362                  | g                       | 2866839                 | g                        | 2937070                  | nc                | O157                       | rec46               | c                                    | O157                                 | ++++                       | c        | c    | c  | c         | c       | c     | c       | c        | c   | c    | c      | c   | c       | c     | c       | c    | c    | c       | c         | c       | c        | c        | c         |
| c                                | 2657365                  | t                       | 2866842                 | t                        | 2937073                  | nc                | O157                       | rec46               | c                                    | O157                                 | ++++                       | c        | c    | c  | c         | c       | c     | c       | c        | c   | c    | c      | c   | c       | c     | c       | c    | c    | c       | c         | c       | c        | c        | c         |
| a                                | 2657367                  | c                       | 2866844                 | c                        | 2937075                  | nc                | O157                       | rec46               | a                                    | O157                                 | ++++                       | a        | a    | a  | a         | a       | a     | a       | a        | a   | a    | a      | a   | a       | a     | a       | a    | a    | a       | a         | a       | a        | a        | a         |
| t                                | 2657368                  | g                       | 2866845                 | g                        | 2937076                  | nc                | O157                       | rec46               | t                                    | O157                                 | ++++                       | a        | a    | a  | t         | t       | t     | t       | t        | t   | t    | t      | t   | t       | t     | t       | t    | t    | t       | t         | t       | t        | t        | t         |
| c                                | 2657369                  | t                       | 2866846                 | t                        | 2937077                  | nc                | O157                       | rec46               | c                                    | O157                                 | ++++                       | c        | c    | c  | c         | c       | c     | c       | c        | c   | c    | c      | c   | c       | c     | c       | c    | c    | c       | c         | c       | c        | c        | c         |
| c                                | 2657370                  | t                       | 2866847                 | t                        | 2937078                  | nc                | O157                       | rec46               | c                                    | O157                                 | ++++                       | c        | c    | c  | c         | c       | c     | c       | c        | c   | c    | c      | c   | c       | c     | c       | c    | c    | c       | c         | c       | c        | c        | c         |
| g                                | 2657374                  | a                       | 2866851                 | a                        | 2937082                  | nc                | O157                       | rec46               | g                                    | O157                                 | ++++                       | g        | g    | g  | g         | g       | g     | g       | g        | g   | g    | g      | g   | g       | g     | g       | g    | g    | g       | g         | g       | g        | g        | g         |
| a                                | 2657377                  | g                       | 2866854                 | g                        | 2937085                  | nc                | O157                       | rec46               | a                                    | O157                                 | ++++                       | a        | a    | a  | a         | a       | a     | a       | a        | a   | a    | a      | a   | a       | a     | a       | a    | a    | a       | a         | a       | a        | a        | a         |
| g                                | 2657380                  | a                       | 2866857                 | a                        | 2937088                  | nc                | O157                       | rec46               | g                                    | O157                                 | ++++                       | g        | g    | g  | g         | g       | g     | g       | g        | g   | g    | g      | g   | g       | g     | g       | g    | g    | g       | g         | g       | g        | g        | g         |
| t                                | 2657384                  | c                       | 2866861                 | c                        | 29                       |                   |                            |                     |                                      |                                      |                            |          |      |    |           |         |       |         |          |     |      |        |     |         |       |         |      |      |         |           |         |          |          |           |





Page 46

| O55 and O157 genome site details |                          |                         |                         |                          |                          |                   |                             |                     |                                      | Outgroup Strain Details        |                            |          |      |    |           |        |       |         |          |     |      |        |     |         |       |         |     |      |         |           |         |          |          |           |   |   |
|----------------------------------|--------------------------|-------------------------|-------------------------|--------------------------|--------------------------|-------------------|-----------------------------|---------------------|--------------------------------------|--------------------------------|----------------------------|----------|------|----|-----------|--------|-------|---------|----------|-----|------|--------|-----|---------|-------|---------|-----|------|---------|-----------|---------|----------|----------|-----------|---|---|
| CB9615 base <sup>b</sup>         | CB9615 Site <sup>c</sup> | Sakai base <sup>b</sup> | Sakai Site <sup>c</sup> | EDL933 base <sup>b</sup> | EDL933 Site <sup>c</sup> | type <sup>d</sup> | Event Lineage <sup>ad</sup> | Recombinant segment | Inferred ancestral base <sup>g</sup> | Outgroup Analysis <sup>e</sup> | Support level <sup>h</sup> | D1 Sd197 | K-12 | HS | ATCC 8739 | UHM026 | IA139 | SMS 3-5 | E2348/69 | 536 | ED1a | CFT073 | S88 | APEC O1 | UT189 | E24377A | IA1 | SE11 | F5 8401 | F2a 2457T | F2a 301 | SS Ss046 | B4 Sbz27 | B18 BSS12 |   |   |
| g                                | 2658475                  | a                       | 2867960                 | a                        | 2938191                  | i                 | O157                        | rec46               | g                                    | O157                           | ++++                       | g        | g    | g  | g         | g      | g     | g       | g        | g   | g    | g      | g   | g       | g     | g       | g   | g    | g       | g         | g       | g        | g        | -         |   |   |
| a                                | 2658485                  | -                       | 2867969                 | -                        | 2938200                  | del               | O157                        | rec46               | a                                    | O157                           | ++++                       | a        | a    | a  | a         | a      | a     | a       | a        | a   | a    | a      | a   | a       | a     | a       | a   | a    | a       | a         | a       | a        | a        | a         |   |   |
| a                                | 2658488                  | g                       | 2867972                 | g                        | 2938203                  | i                 | O157                        | rec46               | a                                    | O157                           | ++++                       | a        | a    | a  | a         | a      | a     | a       | a        | a   | a    | a      | a   | a       | a     | a       | a   | a    | a       | a         | a       | a        | a        | g         |   |   |
| t                                | 2658497                  | t                       | 2867981                 | t                        | 2938212                  | i                 | O157                        | rec46               | t                                    | O157                           | ++++                       | t        | t    | t  | t         | t      | t     | t       | t        | t   | t    | t      | t   | t       | t     | t       | t   | t    | t       | t         | t       | t        | t        | t         |   |   |
| g                                | 2658498                  | t                       | 2867982                 | t                        | 2938213                  | i                 | O157                        | rec46               | g                                    | O157                           | +                          | g        | g    | g  | g         | t      | t     | g       | g        | g   | g    | g      | g   | g       | g     | g       | g   | g    | g       | g         | g       | g        | g        | g         | t |   |
| g                                | 2658499                  | t                       | 2867983                 | t                        | 2938214                  | i                 | O157                        | rec46               | g                                    | O157                           | ++++                       | g        | g    | g  | g         | g      | g     | g       | g        | g   | g    | g      | g   | g       | g     | g       | g   | g    | g       | g         | g       | g        | g        | g         | t |   |
| a                                | 2658547                  | g                       | 2868031                 | g                        | 2938262                  | i                 | O157                        | rec46               | a                                    | O157                           | ++++                       | a        | a    | a  | a         | a      | a     | a       | a        | a   | a    | a      | a   | a       | a     | a       | a   | a    | a       | a         | a       | a        | a        | a         | g |   |
| a                                | 2658575                  | g                       | 2868059                 | g                        | 2938290                  | i                 | O157                        | rec46               | a                                    | O157                           | ++++                       | a        | a    | a  | a         | a      | a     | a       | a        | a   | a    | a      | a   | a       | a     | a       | a   | a    | a       | a         | a       | a        | a        | a         | g |   |
| c                                | 2658596                  | t                       | 2868080                 | t                        | 2938311                  | i                 | O157                        | rec46               | c                                    | O157                           | +                          | c        | c    | c  | t         | t      | t     | t       | t        | t   | t    | t      | t   | t       | c     | c       | c   | c    | c       | c         | c       | c        | c        | c         |   |   |
| t                                | 2658598                  | a                       | 2868082                 | a                        | 2938313                  | i                 | O157                        | rec46               | t                                    | O157                           | +                          | t        | t    | t  | t         | t      | t     | t       | t        | t   | t    | t      | t   | t       | t     | t       | t   | t    | t       | t         | a       | a        | a        | t         | a |   |
| c                                | 2658621                  | a                       | 2868105                 | a                        | 2938336                  | i                 | O157                        | rec46               | c                                    | O157                           | ++++                       | t        | t    | t  | c         | c      | c     | c       | c        | c   | c    | c      | c   | c       | c     | c       | c   | t    | t       | t         | c       | c        | c        | t         | a | c |
| a                                | 2658624                  | c                       | 2868108                 | c                        | 2938339                  | i                 | O157                        | rec46               | a                                    | O157                           | ++++                       | a        | a    | a  | a         | a      | a     | a       | a        | a   | a    | a      | a   | a       | a     | a       | a   | a    | a       | a         | a       | a        | a        | a         | a | g |
| a                                | 2658625                  | g                       | 2868109                 | g                        | 2938340                  | i                 | O157                        | rec46               | a                                    | O157                           | +                          | a        | g    | a  | a         | a      | a     | a       | a        | a   | a    | a      | a   | a       | a     | a       | a   | a    | a       | a         | a       | a        | a        | a         | a | g |
| t                                | 2658626                  | c                       | 2868110                 | c                        | 2938341                  | i                 | O157                        | rec46               | c                                    | CB9615                         | ++                         | g        | c    | g  | c         | g      | g     | g       | g        | g   | g    | g      | g   | g       | g     | g       | g   | g    | g       | g         | g       | g        | g        | g         | c | a |
| a                                | 2658627                  | t                       | 2868111                 | t                        | 2938342                  | i                 | O157                        | rec46               | a                                    | O157                           | ++++                       | a        | a    | a  | c         | c      | c     | c       | c        | c   | c    | c      | c   | c       | c     | c       | a   | a    | a       | a         | a       | a        | a        | a         | t | a |
| g                                | 2658628                  | a                       | 2868112                 | a                        | 2938343                  | i                 | O157                        | rec46               | a                                    | CB9615                         | +                          | g        | t    | g  | a         | a      | a     | a       | a        | a   | a    | a      | a   | a       | a     | a       | g   | g    | g       | a         | a       | a        | a        | a         | a | a |
| t                                | 2658631                  | a                       | 2868115                 | a                        | 2938346                  | i                 | O157                        | rec46               | t                                    | O157                           | +                          | t        | a    | t  | t         |        |       |         |          |     |      |        |     |         |       |         |     |      |         |           |         |          |          |           |   |   |







| O55 and O157 genome site details |                          |                         |                         |                          |                          |                   |                            |                     |                                      | Outgroup Strain Details <sup>i</sup> |                            |          |      |    |           |         |       |         |          |     |      |        |     |         |       |         |      |      |         |           |         |          |          |           |
|----------------------------------|--------------------------|-------------------------|-------------------------|--------------------------|--------------------------|-------------------|----------------------------|---------------------|--------------------------------------|--------------------------------------|----------------------------|----------|------|----|-----------|---------|-------|---------|----------|-----|------|--------|-----|---------|-------|---------|------|------|---------|-----------|---------|----------|----------|-----------|
| CB9615 base <sup>b</sup>         | CB9615 Site <sup>c</sup> | Sakai base <sup>a</sup> | Sakai Site <sup>c</sup> | EDL933 base <sup>b</sup> | EDL933 Site <sup>c</sup> | type <sup>d</sup> | Event Lineage <sup>e</sup> | Recombinant segment | Inferred ancestral base <sup>g</sup> | Outgroup Analysis <sup>h</sup>       | Support level <sup>h</sup> | D1 Sc197 | K-12 | HS | ATCC 8739 | UJMN026 | IAI39 | SMS 3-5 | E2348/69 | 536 | ED1a | CFT073 | S88 | APEC O1 | UT189 | E24377A | IAI1 | SE11 | F5 8401 | F2a 2457T | F2a 301 | SS Ss046 | B4 Sb227 | B18 BS512 |
| a                                | 2664250                  | t                       | 2873739                 | t                        | 2943970                  | s                 | O157                       | rec46               | a                                    | O157                                 | ++                         | a        |      |    |           | a       | a     |         |          |     |      |        |     |         |       |         |      |      |         |           |         |          |          |           |
| g                                | 2664253                  | a                       | 2873742                 | a                        | 2943973                  | s                 | O157                       | rec46               | g                                    | O157                                 | ++                         | g        |      |    |           | g       | t     |         |          |     |      |        |     |         |       |         |      |      |         |           |         |          |          |           |
| a                                | 2664256                  | g                       | 2873745                 | g                        | 2943976                  | s                 | O157                       | rec46               | a                                    | O157                                 | ++                         | a        |      |    |           | g       | g     |         |          |     |      |        |     |         |       |         |      |      |         |           |         |          |          |           |
| c                                | 2664262                  | a                       | 2873751                 | a                        | 2943982                  | s                 | O157                       | rec46               | c                                    | O157                                 | ++                         | c        |      |    |           | c       | t     |         |          |     |      |        |     |         |       |         |      |      |         |           |         |          |          |           |
| a                                | 2664263                  | g                       | 2873752                 | g                        | 2943983                  | ns                | O157                       | rec46               | a                                    | O157                                 | ++                         | a        |      |    |           | a       | g     |         |          |     |      |        |     |         |       |         |      |      |         |           |         |          |          |           |
| g                                | 2664269                  | t                       | 2873758                 | t                        | 2943989                  | ns                | O157                       | rec46               | g                                    | O157                                 | ++                         | g        |      |    |           | g       | g     |         |          |     |      |        |     |         |       |         |      |      |         |           |         |          |          |           |
| c                                | 2664271                  | t                       | 2873760                 | t                        | 2943991                  | ns                | O157                       | rec46               | c                                    | O157                                 | ++                         | c        |      |    |           | c       | c     |         |          |     |      |        |     |         |       |         |      |      |         |           |         |          |          |           |
| c                                | 2664274                  | t                       | 2873763                 | t                        | 2943994                  | s                 | O157                       | rec46               | c                                    | O157                                 | ++                         | c        |      |    |           | c       | g     |         |          |     |      |        |     |         |       |         |      |      |         |           |         |          |          |           |
| a                                | 2664275                  | t                       | 2873764                 | t                        | 2943995                  | ns                | O157                       | rec46               | a                                    | O157                                 | ++                         | a        |      |    |           | a       | a     |         |          |     |      |        |     |         |       |         |      |      |         |           |         |          |          |           |
| g                                | 2664277                  | t                       | 2873766                 | t                        | 2943997                  | ns                | O157                       | rec46               | g                                    | O157                                 | ++                         | g        |      |    |           | t       | g     |         |          |     |      |        |     |         |       |         |      |      |         |           |         |          |          |           |
| a                                | 2664281                  | g                       | 2873770                 | g                        | 2944001                  | ns                | O157                       | rec46               | a                                    | O157                                 | ++                         | a        |      |    |           | a       | a     |         |          |     |      |        |     |         |       |         |      |      |         |           |         |          |          |           |
| a                                | 2664286                  | t                       | 2873775                 | t                        | 2944006                  | s                 | O157                       | rec46               | a                                    | O157                                 | ++                         | a        |      |    |           | g       | a     |         |          |     |      |        |     |         |       |         |      |      |         |           |         |          |          |           |
| g                                | 2664291                  | a                       | 2873780                 | a                        | 2944011                  | ns                | O157                       | rec46               | g                                    | O157                                 | ++                         | g        |      |    |           | g       | g     |         |          |     |      |        |     |         |       |         |      |      |         |           |         |          |          |           |
| a                                | 2664292                  | g                       | 2873781                 | g                        | 2944012                  | ns                | O157                       | rec46               | a                                    | O157                                 | ++                         | a        |      |    |           | a       | a     |         |          |     |      |        |     |         |       |         |      |      |         |           |         |          |          |           |
| a                                | 2664298                  | c                       | 2873787                 | c                        | 2944018                  | s                 | O157                       | rec46               | a                                    | O157                                 | ++                         | a        |      |    |           | a       | a     |         |          |     |      |        |     |         |       |         |      |      |         |           |         |          |          |           |
| g                                | 2664299                  | a                       | 2873788                 | a                        | 2944019                  | ns                | O157                       | rec46               | g                                    | O157                                 | ++                         | g        |      |    |           | g       | g     |         |          |     |      |        |     |         |       |         |      |      |         |           |         |          |          |           |
| g                                | 2664301                  | a                       | 2873790                 | a                        | 2944021                  | ns                | O157                       | rec46               | g                                    | O157                                 | ++                         | g        |      |    |           | g       | g     |         |          |     |      |        |     |         |       |         |      |      |         |           |         |          |          |           |
| t                                | 2664302                  | a                       | 2873791                 | a                        | 2944022                  | ns                | O157                       | rec46               | t                                    | O157                                 | ++                         | t        |      |    |           | t       | t     |         |          |     |      |        |     |         |       |         |      |      |         |           |         |          |          |           |
| t                                | 2664303                  | a                       | 2873792                 | a                        | 2944023                  | ns                | O157                       | rec46               | t                                    | O157                                 | ++                         | t        |      |    |           | t       | t     |         |          |     |      |        |     |         |       |         |      |      |         |           |         |          |          |           |
| a                                | 2664305                  | c                       | 2873794                 | c                        | 2944025                  | ns                | O157                       | rec46               | a                                    | O157                                 | ++                         | a        |      |    |           | a       | a     |         |          |     |      |        |     |         |       |         |      |      |         |           |         |          |          |           |
| c                                | 2664307                  | g                       | 2873796                 | g                        | 2944027                  | ns                | O157                       | rec46               | c                                    | O157                                 | ++                         | c        |      |    |           | c       | a     |         |          |     |      |        |     |         |       |         |      |      |         |           |         |          |          |           |
| g                                | 2664309                  | c                       | 2873798                 | c                        | 2944029                  | ns                | O157                       | rec46               | g                                    | O157                                 | ++                         | g        |      |    |           | g       | g     |         |          |     |      |        |     |         |       |         |      |      |         |           |         |          |          |           |
| t                                | 2664310                  | c                       | 2873799                 | c                        | 2944030                  | ns                | O157                       | rec46               | t                                    | O157                                 | ++                         | t        |      |    |           | t       | t     |         |          |     |      |        |     |         |       |         |      |      |         |           |         |          |          |           |
| a                                | 2664312                  | g                       | 2873801                 | g                        | 2944032                  | ns                | O157                       | rec46               | a                                    | O157                                 | ++                         | a        |      |    |           | a       | a     |         |          |     |      |        |     |         |       |         |      |      |         |           |         |          |          |           |
| g                                | 2664317                  | t                       | 2873806                 | t                        | 2944037                  | ns                | O157                       | rec46               | g                                    | O157                                 | ++                         | g        |      |    |           | g       | g     |         |          |     |      |        |     |         |       |         |      |      |         |           |         |          |          |           |
| a                                | 2664320                  | c                       | 2873809                 | c                        | 2944040                  | ns                | O157                       | rec46               | a                                    | O157                                 | ++                         | a        |      |    |           | a       | a     |         |          |     |      |        |     |         |       |         |      |      |         |           |         |          |          |           |
| -                                | 2664321                  | t                       | 2873811                 | t                        | 2944042                  | ins-4             | O157                       | rec46               | -                                    | O157                                 | ++                         | -        |      |    |           | -       | -     |         |          |     |      |        |     |         |       |         |      |      |         |           |         |          |          |           |
| t                                | 2664323                  | c                       | 2873816                 | c                        | 2944047                  | ns                | O157                       | rec46               | t                                    | O157                                 | ++                         | t        |      |    |           | t       | t     |         |          |     |      |        |     |         |       |         |      |      |         |           |         |          |          |           |
| g                                | 2664327                  | c                       | 2873820                 | c                        | 2944051                  | ns                | O157                       | rec46               | g                                    | O157                                 | ++                         | g        |      |    |           | g       | g     |         |          |     |      |        |     |         |       |         |      |      |         |           |         |          |          |           |
| a                                | 2664328                  | t                       | 2873821                 | t                        | 2944052                  | ns                | O157                       | rec46               | a                                    | O157                                 | ++                         | a        |      |    |           | a       | a     |         |          |     |      |        |     |         |       |         |      |      |         |           |         |          |          |           |
| t                                | 2664330                  | c                       | 2873823                 | c                        | 2944054                  | ns                | O157                       | rec46               | t                                    | O157                                 | ++                         | t        |      |    |           | t       | t     |         |          |     |      |        |     |         |       |         |      |      |         |           |         |          |          |           |
| t                                | 2664334                  | c                       | 2873827                 | c                        | 2944058                  | s                 | O157                       | rec46               | ?                                    | O157                                 | +/-                        | g        |      |    |           | g       | g     |         |          |     |      |        |     |         |       |         |      |      |         |           |         |          |          |           |
| g                                | 2664335                  | -                       | 2873827                 | -                        | 2944058                  | del               | O157                       | rec46               | g                                    | O157                                 | ++                         | g        |      |    |           | g       | g     |         |          |     |      |        |     |         |       |         |      |      |         |           |         |          |          |           |
| c                                | 2664340                  | a                       | 2873832                 | a                        | 2944063                  | s                 | O157                       | rec46               | c                                    | O157                                 | ++                         | c        |      |    |           | c       | c     |         |          |     |      |        |     |         |       |         |      |      |         |           |         |          |          |           |
| g                                | 2664343                  | c                       | 2873835                 | c                        | 2944066                  | s                 | O157                       | rec46               | g                                    | O157                                 | ++                         | g        |      |    |           | g       | g     |         |          |     |      |        |     |         |       |         |      |      |         |           |         |          |          |           |
| t                                | 2664347                  | c                       | 2873839                 | c                        | 2944070                  | ns                | O157                       | rec46               | t                                    | O157                                 | ++                         | t        |      |    |           | t       | t     |         |          |     |      |        |     |         |       |         |      |      |         |           |         |          |          |           |
| t                                | 2664349                  | g                       | 2873841                 | g                        | 2944072                  | ns                | O157                       | rec46               | t                                    | O157                                 | ++                         | t        |      |    |           | t       | t     |         |          |     |      |        |     |         |       |         |      |      |         |           |         |          |          |           |
| a                                | 2664355                  | g                       | 2873847                 | g                        | 2944078                  | s                 | O157                       | rec46               | a                                    | O157                                 | ++                         | a        |      |    |           | a       | a     |         |          |     |      |        |     |         |       |         |      |      |         |           |         |          |          |           |
| t                                | 2664356                  | a                       | 2873848                 | a                        | 2944079                  | ns                | O157                       | rec46               | t                                    | O157                                 | ++                         | t        |      |    |           | t       | t     |         |          |     |      |        |     |         |       |         |      |      |         |           |         |          |          |           |
| c                                | 2664359                  | a                       | 2873851                 | a                        | 2944082                  | ns                | O157                       | rec46               | c                                    | O157                                 | ++                         | c        |      |    |           | c       | c     |         |          |     |      |        |     |         |       |         |      |      |         |           |         |          |          |           |
| g                                | 2664361                  | a                       | 2873853                 | a                        | 2944084                  | ns                | O157                       | rec46               | g                                    | O157                                 | ++                         | g        |      |    |           | g       | g     |         |          |     |      |        |     |         |       |         |      |      |         |           |         |          |          |           |
| c                                | 2664367                  | a                       | 2873859                 | a                        | 2944090                  | s                 | O157                       | rec46               | c                                    | O157                                 | ++                         | c        |      |    |           | c       | c     |         |          |     |      |        |     |         |       |         |      |      |         |           |         |          |          |           |
| a                                | 2664370                  | g                       | 2873862                 | g                        | 2944093                  | s                 | O157                       | rec46               | a                                    | O157                                 | ++                         | a        |      |    |           | a       | a     |         |          |     |      |        |     |         |       |         |      |      |         |           |         |          |          |           |
| t                                | 2664379                  | c                       | 2873871                 | c                        | 2944102                  | s                 | O157                       | rec46               | t                                    | O157                                 | ++                         | t        |      |    |           | c       | t     |         |          |     |      |        |     |         |       |         |      |      |         |           |         |          |          |           |
| a                                | 2664385                  | g                       | 2873877                 | g                        | 2944108                  | s                 | O157                       | rec46               | a                                    | O157                                 | ++                         | a        |      |    |           | a       | a     |         |          |     |      |        |     |         |       |         |      |      |         |           |         |          |          |           |
| t                                | 2664387                  | c                       | 2873879                 | c                        | 2944110                  | ns                | O157                       | rec46               | t                                    | O157                                 | ++                         | t        |      |    |           | t       | t     |         |          |     |      |        |     |         |       |         |      |      |         |           |         |          |          |           |
| a                                | 2664388                  | g                       | 2873880                 | g                        | 2944111                  | ns                | O157                       | rec46               | a                                    | O157                                 | ++                         | a        |      |    |           | a       | a     |         |          |     |      |        |     |         |       |         |      |      |         |           |         |          |          |           |
| t                                | 2664391                  | c                       | 2873883                 | c                        | 2944114                  | s                 | O157                       | rec46               | t                                    | O157                                 | ++                         | t        |      |    |           | t       | t     |         |          |     |      |        |     |         |       |         |      |      |         |           |         |          |          |           |
| g                                | 2664392                  | a                       | 2873884                 | a                        | 2944115                  | ns                | O157                       | rec46               | g                                    | O157                                 | ++                         | g        |      |    |           | g       | g     |         |          |     |      |        |     |         |       |         |      |      |         |           |         |          |          |           |
| a                                | 2664399                  | c                       | 2873891                 | c                        | 2944122                  | ns                | O157                       | rec46               | a                                    | O157                                 | +                          |          |      |    |           | a       | a     |         |          |     |      |        |     |         |       |         |      |      |         |           |         |          |          |           |
| c                                | 2664411                  | a                       | 2873903                 | a                        | 2944134                  | ns                | O157                       | rec46               | c                                    | O157                                 | +                          |          |      |    |           | c       | c     |         |          |     |      |        |     |         |       |         |      |      |         |           |         |          |          |           |
| t                                | 2664413                  | c                       | 2873905                 | c                        | 2944136                  | ns                | O157                       | rec46               | t                                    | O157                                 | +                          |          |      |    |           | t       | t     |         |          |     |      |        |     |         |       |         |      |      |         |           |         |          |          |           |
| c                                | 2664414                  | a                       | 2873906                 | a                        | 2944137                  | ns                | O157                       | rec46               | c                                    | O157                                 | +                          |          |      |    |           | c       | c     |         |          |     |      |        |     |         |       |         |      |      |         |           |         |          |          |           |
| t                                | 2664415                  | c                       | 2873907                 | c                        | 2944138                  | ns                | O157                       | rec46               | t                                    | O157                                 | +                          |          |      |    |           | t       | t     |         |          |     |      |        |     |         |       |         |      |      |         |           |         |          |          |           |
| c                                | 2664418                  | a                       | 2873910                 | a                        | 2944141                  | ns                | O157                       | rec46               | c                                    | O157                                 | +                          |          |      |    |           | c       | c     |         |          |     |      |        |     |         |       |         |      |      |         |           |         |          |          |           |
| t                                | 2664421                  | a                       | 2873913                 | a                        | 2944144                  | s                 | O157                       | rec46               | t                                    | O157                                 | +                          |          |      |    |           | t       | t     |         |          |     |      |        |     |         |       |         |      |      |         |           |         |          |          |           |
| t                                | 2664424                  | g                       | 2873916                 | g                        | 2944147                  | s                 | O157                       | rec46               | t                                    | O157                                 | +                          |          |      |    |           | t       | t     |         |          |     |      |        |     |         |       |         |      |      |         |           |         |          |          |           |
| t                                | 2664425                  | c                       | 2873917                 | c                        | 2944148                  | ns                | O157                       | rec46               | t                                    | O157                                 | +                          |          |      |    |           | t       | t     |         |          |     |      |        |     |         |       |         |      |      |         |           |         |          |          |           |
| a                                | 2664433                  | g                       | 2873925                 | g                        | 2944156                  | s                 | O157                       | rec46               | a                                    | O157                                 | +                          |          |      |    |           | a       | a     |         |          |     |      |        |     |         |       |         |      |      |         |           |         |          |          |           |
| a                                | 2664436                  | g                       | 2873928                 | g                        | 2944159                  | s                 | O157                       | rec46               | a                                    | O157                                 | +                          |          |      |    |           | a       | a     |         |          |     |      |        |     |         |       |         |      |      |         |           |         |          |          |           |
| c                                | 2664445                  | a                       | 2873937                 | a                        | 2944168                  | s                 | O157</                     |                     |                                      |                                      |                            |          |      |    |           |         |       |         |          |     |      |        |     |         |       |         |      |      |         |           |         |          |          |           |

[illegible]

| O55 and O157 genome site details |                          |                         |                         |                          |                          |                   |                            |                     |                                      | Outgroup Strain Details <sup>i</sup> |                            |          |      |    |           |         |       |         |          |     |      |        |     |         |       |         |      |      |         |           |         |          |          |           |
|----------------------------------|--------------------------|-------------------------|-------------------------|--------------------------|--------------------------|-------------------|----------------------------|---------------------|--------------------------------------|--------------------------------------|----------------------------|----------|------|----|-----------|---------|-------|---------|----------|-----|------|--------|-----|---------|-------|---------|------|------|---------|-----------|---------|----------|----------|-----------|
| CB9615 base <sup>b</sup>         | CB9615 Site <sup>c</sup> | Sakai base <sup>a</sup> | Sakai Site <sup>c</sup> | EDL933 base <sup>b</sup> | EDL933 Site <sup>c</sup> | type <sup>d</sup> | Event Lineage <sup>e</sup> | Recombinant segment | Inferred ancestral base <sup>g</sup> | Outgroup Analysis <sup>h</sup>       | Support level <sup>h</sup> | D1 Sd197 | K-12 | HS | ATCC 8739 | UJMN026 | IAI39 | SMS 3-5 | E2348/69 | 536 | ED1a | CFT073 | S88 | APEC O1 | UT189 | E24377A | IAI1 | SE11 | F5 8401 | F2a 2457T | F2a 301 | SS Ss046 | B4 Sb227 | B18 BS512 |
| a                                | 2664875                  | t                       | 2874367                 | t                        | 2944598                  | ns                | O157                       | rec46               | a                                    | O157                                 | +                          |          |      |    |           | a       | a     |         |          |     |      |        |     |         |       |         |      |      |         |           |         |          |          |           |
| c                                | 2664877                  | t                       | 2874369                 | t                        | 2944600                  | ns                | O157                       | rec46               | c                                    | O157                                 | +                          |          |      |    |           | c       | c     |         |          |     |      |        |     |         |       |         |      |      |         |           |         |          |          |           |
| g                                | 2664880                  | a                       | 2874372                 | a                        | 2944603                  | s                 | O157                       | rec46               | g                                    | O157                                 | +                          |          |      |    |           | g       | g     |         |          |     |      |        |     |         |       |         |      |      |         |           |         |          |          |           |
| a                                | 2664901                  | g                       | 2874393                 | g                        | 2944624                  | s                 | O157                       | rec46               | a                                    | O157                                 | +                          |          |      |    |           | a       | a     |         |          |     |      |        |     |         |       |         |      |      |         |           |         |          |          |           |
| g                                | 2664904                  | t                       | 2874396                 | t                        | 2944627                  | s                 | O157                       | rec46               | g                                    | O157                                 | +                          |          |      |    |           | g       | g     |         |          |     |      |        |     |         |       |         |      |      |         |           |         |          |          |           |
| t                                | 2664908                  | g                       | 2874400                 | g                        | 2944631                  | ns                | O157                       | rec46               | t                                    | O157                                 | +                          |          |      |    |           | t       | t     |         |          |     |      |        |     |         |       |         |      |      |         |           |         |          |          |           |
| g                                | 2664913                  | c                       | 2874405                 | c                        | 2944636                  | s                 | O157                       | rec46               | g                                    | O157                                 | +                          |          |      |    |           | g       | g     |         |          |     |      |        |     |         |       |         |      |      |         |           |         |          |          |           |
| c                                | 2664923                  | a                       | 2874415                 | a                        | 2944646                  | ns                | O157                       | rec46               | c                                    | O157                                 | +                          |          |      |    |           | c       | c     |         |          |     |      |        |     |         |       |         |      |      |         |           |         |          |          |           |
| c                                | 2664924                  | a                       | 2874416                 | a                        | 2944647                  | ns                | O157                       | rec46               | c                                    | O157                                 | +                          |          |      |    |           | c       | c     |         |          |     |      |        |     |         |       |         |      |      |         |           |         |          |          |           |
| g                                | 2664925                  | a                       | 2874417                 | a                        | 2944648                  | ns                | O157                       | rec46               | g                                    | O157                                 | +                          |          |      |    |           | g       | g     |         |          |     |      |        |     |         |       |         |      |      |         |           |         |          |          |           |
| t                                | 2664926                  | g                       | 2874418                 | g                        | 2944649                  | ns                | O157                       | rec46               | t                                    | O157                                 | +                          |          |      |    |           | t       | t     |         |          |     |      |        |     |         |       |         |      |      |         |           |         |          |          |           |
| c                                | 2664928                  | a                       | 2874420                 | a                        | 2944651                  | ns                | O157                       | rec46               | c                                    | O157                                 | +                          |          |      |    |           | c       | c     |         |          |     |      |        |     |         |       |         |      |      |         |           |         |          |          |           |
| c                                | 2664929                  | a                       | 2874421                 | a                        | 2944652                  | ns                | O157                       | rec46               | c                                    | O157                                 | +                          |          |      |    |           | c       | c     |         |          |     |      |        |     |         |       |         |      |      |         |           |         |          |          |           |
| a                                | 2664932                  | g                       | 2874424                 | g                        | 2944655                  | ns                | O157                       | rec46               | a                                    | O157                                 | +                          |          |      |    |           | a       | a     |         |          |     |      |        |     |         |       |         |      |      |         |           |         |          |          |           |
| g                                | 2664937                  | t                       | 2874429                 | t                        | 2944660                  | s                 | O157                       | rec46               | g                                    | O157                                 | +                          |          |      |    |           | g       | g     |         |          |     |      |        |     |         |       |         |      |      |         |           |         |          |          |           |
| a                                | 2664940                  | t                       | 2874432                 | t                        | 2944663                  | ns                | O157                       | rec46               | a                                    | O157                                 | +                          |          |      |    |           | a       | a     |         |          |     |      |        |     |         |       |         |      |      |         |           |         |          |          |           |
| a                                | 2664942                  | g                       | 2874434                 | g                        | 2944665                  | ns                | O157                       | rec46               | a                                    | O157                                 | +                          |          |      |    |           | a       | a     |         |          |     |      |        |     |         |       |         |      |      |         |           |         |          |          |           |
| a                                | 2664955                  | g                       | 2874447                 | g                        | 2944678                  | s                 | O157                       | rec46               | a                                    | O157                                 | +                          |          |      |    |           | a       | a     |         |          |     |      |        |     |         |       |         |      |      |         |           |         |          |          |           |
| c                                | 2664958                  | t                       | 2874450                 | t                        | 2944681                  | s                 | O157                       | rec46               | c                                    | O157                                 | +                          |          |      |    |           | c       | c     |         |          |     |      |        |     |         |       |         |      |      |         |           |         |          |          |           |
| t                                | 2664960                  | g                       | 2874452                 | g                        | 2944683                  | ns                | O157                       | rec46               | ?                                    | O157                                 | +/-                        |          |      |    |           | g       | t     |         |          |     |      |        |     |         |       |         |      |      |         |           |         |          |          |           |
| c                                | 2664961                  | t                       | 2874453                 | t                        | 2944684                  | ns                | O157                       | rec46               | c                                    | O157                                 | +                          |          |      |    |           | c       | c     |         |          |     |      |        |     |         |       |         |      |      |         |           |         |          |          |           |
| a                                | 2664967                  | g                       | 2874459                 | g                        | 2944690                  | s                 | O157                       | rec46               | a                                    | O157                                 | +                          |          |      |    |           | a       | a     |         |          |     |      |        |     |         |       |         |      |      |         |           |         |          |          |           |
| a                                | 2664973                  | t                       | 2874465                 | t                        | 2944696                  | ns                | O157                       | rec46               | a                                    | O157                                 | +                          |          |      |    |           | a       | a     |         |          |     |      |        |     |         |       |         |      |      |         |           |         |          |          |           |
| c                                | 2665006                  | g                       | 2874498                 | g                        | 2944729                  | s                 | O157                       | rec46               | c                                    | O157                                 | +                          |          |      |    |           | c       | c     |         |          |     |      |        |     |         |       |         |      |      |         |           |         |          |          |           |
| t                                | 2665010                  | g                       | 2874502                 | g                        | 2944733                  | ns                | O157                       | rec46               | g                                    | CB9615                               | +                          |          |      |    |           | a       | g     |         |          |     |      |        |     |         |       |         |      |      |         |           |         |          |          |           |
| a                                | 2665051                  | g                       | 2874543                 | g                        | 2944774                  | nc                | O157                       | rec46               | ?                                    | O157                                 | +/-                        |          |      |    |           | g       | a     |         |          |     |      |        |     |         |       |         |      |      |         |           |         |          |          |           |
| t                                | 2665054                  | c                       | 2874546                 | c                        | 2944777                  | nc                | O157                       | rec46               | ?                                    | O157                                 | +/-                        |          |      |    |           | c       | t     |         |          |     |      |        |     |         |       |         |      |      |         |           |         |          |          |           |
| t                                | 2665081                  | c                       | 2874573                 | c                        | 2944804                  | nc                | O157                       | rec46               | c                                    | CB9615                               | +                          |          |      |    |           | c       | c     |         |          |     |      |        |     |         |       |         |      |      |         |           |         |          |          |           |
| a                                | 2665084                  | t                       | 2874576                 | t                        | 2944807                  | nc                | O157                       | rec46               | ?                                    | O157                                 | +/-                        |          |      |    |           | t       | a     |         |          |     |      |        |     |         |       |         |      |      |         |           |         |          |          |           |
| c                                | 2665118                  | a                       | 2874610                 | a                        | 2944841                  | nc                | O157                       | rec46               | a                                    | CB9615                               | +                          |          |      |    |           | a       | a     |         |          |     |      |        |     |         |       |         |      |      |         |           |         |          |          |           |
| a                                | 2665123                  | g                       | 2874615                 | g                        | 2944846                  | nc                | O157                       | rec46               | a                                    | O157                                 | +                          |          |      |    |           | a       | a     |         |          |     |      |        |     |         |       |         |      |      |         |           |         |          |          |           |
| t                                | 2665135                  | a                       | 2874627                 | a                        | 2944858                  | nc                | O157                       | rec46               | a                                    | CB9615                               | +                          |          |      |    |           | a       | a     |         |          |     |      |        |     |         |       |         |      |      |         |           |         |          |          |           |
| c                                | 2665163                  | t                       | 2874655                 | t                        | 2944886                  | nc                | O157                       | rec46               | c                                    | O157                                 | +                          |          |      |    |           | c       | c     |         |          |     |      |        |     |         |       |         |      |      |         |           |         |          |          |           |
| a                                | 2665192                  | t                       | 2874684                 | t                        | 2944915                  | nc                | O157                       | rec46               | ?                                    | O157                                 | +/-                        |          |      |    |           | a       | t     |         |          |     |      |        |     |         |       |         |      |      |         |           |         |          |          |           |
| t                                | 2665196                  | c                       | 2874688                 | c                        | 2944919                  | nc                | O157                       | rec46               | t                                    | O157                                 | +                          |          |      |    |           | t       | t     |         |          |     |      |        |     |         |       |         |      |      |         |           |         |          |          |           |
| a                                | 2665207                  | t                       | 2874699                 | t                        | 2944930                  | nc                | O157                       | rec46               | a                                    | O157                                 | +                          |          |      |    |           | a       | a     |         |          |     |      |        |     |         |       |         |      |      |         |           |         |          |          |           |
| t                                | 2665220                  | g                       | 2874712                 | g                        | 2944943                  | nc                | O157                       | rec46               | g                                    | CB9615                               | +                          |          |      |    |           | g       | g     |         |          |     |      |        |     |         |       |         |      |      |         |           |         |          |          |           |
| c                                | 2665236                  | a                       | 2874728                 | a                        | 2944959                  | nc                | O157                       | rec46               | ?                                    | O157                                 | +/-                        |          |      |    |           | c       | a     |         |          |     |      |        |     |         |       |         |      |      |         |           |         |          |          |           |
| g                                | 2665237                  | t                       | 2874729                 | t                        | 2944960                  | nc                | O157                       | rec46               | g                                    | O157                                 | +                          |          |      |    |           | g       | g     |         |          |     |      |        |     |         |       |         |      |      |         |           |         |          |          |           |
| c                                | 2665243                  | t                       | 2874735                 | t                        | 2944966                  | nc                | O157                       | rec46               | c                                    | O157                                 | +                          |          |      |    |           | c       | c     |         |          |     |      |        |     |         |       |         |      |      |         |           |         |          |          |           |
| a                                | 2665245                  | g                       | 2874737                 | g                        | 2944968                  | nc                | O157                       | rec46               | a                                    | O157                                 | +                          |          |      |    |           | a       | a     |         |          |     |      |        |     |         |       |         |      |      |         |           |         |          |          |           |
| g                                | 2665249                  | a                       | 2874741                 | a                        | 2944972                  | nc                | O157                       | rec46               | g                                    | O157                                 | +                          |          |      |    |           | g       | c     |         |          |     |      |        |     |         |       |         |      |      |         |           |         |          |          |           |
| c                                | 2665251                  | t                       | 2874743                 | t                        | 2944974                  | nc                | O157                       | rec46               | c                                    | O157                                 | +                          |          |      |    |           | c       | c     |         |          |     |      |        |     |         |       |         |      |      |         |           |         |          |          |           |
| c                                | 2665276                  | a                       | 2874768                 | a                        | 2944999                  | nc                | O157                       | rec46               | c                                    | O157                                 | +                          |          |      |    |           | c       | c     | g       |          |     |      |        |     |         |       |         |      |      |         |           |         |          |          |           |
| c                                | 2665291                  | g                       | 2874783                 | g                        | 2945014                  | nc                | O157                       | rec46               | g                                    | CB9615                               | +                          |          |      |    |           | g       | g     | g       |          |     |      |        |     |         |       |         |      |      |         |           |         |          |          |           |
| c                                | 2665294                  | t                       | 2874786                 | t                        | 2945017                  | nc                | O157                       | rec46               | t                                    | CB9615                               | +                          |          |      |    |           | t       | t     | t       |          |     |      |        |     |         |       |         |      |      |         |           |         |          |          |           |
| a                                | 2665295                  | c                       | 2874787                 | c                        | 2945018                  | nc                | O157                       | rec46               | a                                    | O157                                 | +                          |          |      |    |           | a       | a     | a       |          |     |      |        |     |         |       |         |      |      |         |           |         |          |          |           |
| g                                | 2665297                  | c                       | 2874789                 | c                        | 2945020                  | nc                | O157                       | rec46               | c                                    | CB9615                               | +                          |          |      |    |           | c       | c     | c       |          |     |      |        |     |         |       |         |      |      |         |           |         |          |          |           |
| a                                | 2665300                  | c                       | 2874792                 | c                        | 2945023                  | nc                | O157                       | rec46               | c                                    | CB9615                               | +                          |          |      |    |           | a       | c     | c       |          |     |      |        |     |         |       |         |      |      |         |           |         |          |          |           |
| a                                | 2665312                  | t                       | 2874804                 | t                        | 2945035                  | nc                | O157                       | rec46               | t                                    | CB9615                               | +                          |          |      |    |           | t       | t     | t       |          |     |      |        |     |         |       |         |      |      |         |           |         |          |          |           |
| g                                | 2665330                  | a                       | 2874822                 | a                        | 2945053                  | nc                | O157                       | rec46               | a                                    | CB9615                               | +                          |          |      |    |           | a       | a     | g       |          |     |      |        |     |         |       |         |      |      |         |           |         |          |          |           |
| c                                | 2665345                  | t                       | 2874837                 | t                        | 2945068                  | nc                | O157                       | rec46               | t                                    | CB9615                               | +                          |          |      |    |           | t       | c     | t       |          |     |      |        |     |         |       |         |      |      |         |           |         |          |          |           |
| g                                | 2665351                  | t                       | 2874843                 | t                        | 2945074                  | nc                | O157                       | rec46               | g                                    | O157                                 | +                          |          |      |    |           | g       | g     | a       |          |     |      |        |     |         |       |         |      |      |         |           |         |          |          |           |
| c                                | 2665358                  | t                       | 2874850                 | t                        | 2945081                  | nc                | O157                       | rec46               | t                                    | CB9615                               | +                          |          |      |    |           | t       | t     | c       |          |     |      |        |     |         |       |         |      |      |         |           |         |          |          |           |
| a                                | 2665370                  | g                       | 2874862                 | g                        | 2945093                  | nc                | O157                       | rec46               | g                                    | CB9615                               | +                          |          |      |    |           | g       | g     | g       |          |     |      |        |     |         |       |         |      |      |         |           |         |          |          |           |
| c                                | 2665385                  | t                       | 2874877                 | t                        | 2945108                  | nc                | O157                       | rec46               | t                                    | CB9615                               | +                          |          |      |    |           | t       | t     | c       |          |     |      |        |     |         |       |         |      |      |         |           |         |          |          |           |
| c                                | 2665396                  | t                       | 2874888                 | t                        | 2945119                  | nc                | O157                       | rec46               | t                                    | CB9615                               | +                          |          |      |    |           | t       | t     | a       |          |     |      |        |     |         |       |         |      |      |         |           |         |          |          |           |
| g                                | 2665411                  | t                       | 2874903                 | t                        | 2945134                  | nc                | O157                       | rec46               | t                                    | CB9615                               | +                          |          |      |    |           | t       | g     | t       |          |     |      |        |     |         |       |         |      |      |         |           |         |          |          |           |
| t                                | 2665414                  | g                       | 2874906                 | g                        | 2945137                  | nc                | O157                       | rec46               | ?                                    | O157                                 | +/-                        |          |      |    |           | g       | t     | c       |          |     |      |        |     |         |       |         |      |      |         |           |         |          |          |           |
| c                                | 2665432                  | g                       | 2874924                 | g                        | 2945155                  | nc                | O157                       | rec46               | ?                                    | O157                                 | +/-                        |          |      |    |           | g       | c     | t       |          |     |      |        |     |         |       |         |      |      |         |           |         |          |          |           |
| t                                | 2665438                  | g                       | 2874930                 | g                        | 2945161                  | nc                | O157                       | rec46               | ?                                    | O157                                 | +/-                        |          | </   |    |           |         |       |         |          |     |      |        |     |         |       |         |      |      |         |           |         |          |          |           |















| O55 and O157 genome site details |                          |                         |                         |                          |                          |                   |                            |                     |                                      | Outgroup Strain Details <sup>i</sup> |                            |          |      |    |           |         |       |         |          |     |      |        |     |         |       |         |      |      |         |           |         |          |          |           |
|----------------------------------|--------------------------|-------------------------|-------------------------|--------------------------|--------------------------|-------------------|----------------------------|---------------------|--------------------------------------|--------------------------------------|----------------------------|----------|------|----|-----------|---------|-------|---------|----------|-----|------|--------|-----|---------|-------|---------|------|------|---------|-----------|---------|----------|----------|-----------|
| CB0615 base <sup>b</sup>         | CB0615 Site <sup>c</sup> | Sakai base <sup>a</sup> | Sakai Site <sup>c</sup> | EDL933 base <sup>b</sup> | EDL933 Site <sup>c</sup> | type <sup>d</sup> | Event Lineage <sup>d</sup> | Recombinant segment | Inferred ancestral base <sup>e</sup> | Outgroup Analysis <sup>e</sup>       | Support level <sup>h</sup> | D1 Sd197 | K-12 | HS | ATCC 8739 | UJMN026 | IA139 | SMS 3-5 | E2348/69 | 536 | ED1a | CFT073 | S88 | APEC O1 | UT189 | E24377A | IA11 | SE11 | F5 8401 | F2a 2457T | F2a 301 | SS Ss046 | B4 Sb227 | B18 BS512 |
| c                                | 4863413                  | c                       | 4975771                 | g                        | 5044534                  | i                 | EDL933                     | rec64               | g                                    | 2                                    | -                          | g        | g    | c  | c         | c       | g     | c       | c        | g   | g    | c      | c   | g       | g     | g       | g    | g    | c       | c         | c       | c        | g        | c         |
| c                                | 4863416                  | c                       | 4975774                 | a                        | 5044537                  | i                 | EDL933                     | rec64               | a                                    | 2                                    | -                          | a        | a    | a  | c         | a       | a     | a       | a        | a   | g    | c      | g   | a       | a     | a       | a    | a    | a       | a         | a       | a        | a        | a         |
| g                                | 4863417                  | g                       | 4975775                 | a                        | 5044538                  | i                 | EDL933                     | rec64               | a                                    | 2                                    | -                          | a        | a    | g  | g         | g       | g     | g       | g        | g   | a    | g      | a   | a       | a     | a       | a    | a    | a       | a         | a       | a        | a        | a         |
| t                                | 4863418                  | t                       | 4975776                 | g                        | 5044539                  | i                 | EDL933                     | rec64               | g                                    | 2                                    | -                          | g        | g    | -  | c         | c       | c     | c       | c        | c   | g    | t      | g   | g       | g     | g       | g    | g    | g       | g         | g       | g        | g        | g         |
| c                                | 4863421                  | c                       | 4975779                 | g                        | 5044542                  | i                 | EDL933                     | rec64               | g                                    | 2                                    | -                          | g        | g    | g  | c         | c       | g     | c       | c        | c   | g    | c      | g   | c       | g     | g       | g    | g    | g       | g         | g       | g        | g        | g         |
| a                                | 4863422                  | a                       | 4975780                 | c                        | 5044543                  | i                 | EDL933                     | rec64               | c                                    | 2                                    | -                          | c        | c    | c  | c         | a       | a     | a       | a        | a   | c    | a      | c   | a       | c     | c       | c    | c    | c       | c         | c       | c        | c        | c         |
| a                                | 4863558                  | a                       | 4975916                 | g                        | 5044679                  | i                 | EDL933                     | rec64               | a                                    | EDL933                               | ++                         | a        | g    | a  | a         | a       | a     | a       | a        | a   | g    | a      | a   | a       | a     | a       | a    | a    | a       | a         | a       | a        | a        | a         |
| c                                | 4872933                  | c                       | 4985293                 | g                        | 5054039                  | s                 | EDL933                     | rec65               | c                                    | EDL933                               | ++++                       | c        | c    | c  | c         | c       | c     | c       | c        | c   | c    | c      | c   | c       | c     | c       | c    | c    | c       | c         | c       | c        | c        | c         |
| g                                | 4872942                  | g                       | 4985302                 | c                        | 5054048                  | s                 | EDL933                     | rec65               | g                                    | EDL933                               | ++++                       | g        | g    | g  | g         | g       | g     | g       | g        | g   | g    | g      | g   | g       | g     | g       | g    | g    | g       | g         | g       | g        | g        | g         |
| g                                | 4872945                  | g                       | 4985305                 | a                        | 5054051                  | s                 | EDL933                     | rec65               | g                                    | EDL933                               | ++++                       | g        | g    | g  | g         | g       | g     | g       | g        | g   | g    | g      | g   | g       | g     | g       | g    | g    | g       | g         | g       | g        | g        | g         |
| c                                | 4872949                  | c                       | 4985309                 | t                        | 5054055                  | ns                | EDL933                     | rec65               | c                                    | EDL933                               | ++++                       | c        | c    | c  | c         | c       | c     | c       | c        | c   | c    | c      | c   | c       | c     | c       | c    | c    | c       | c         | c       | c        | c        | c         |
| c                                | 4872960                  | c                       | 4985320                 | t                        | 5054066                  | s                 | EDL933                     | rec65               | c                                    | EDL933                               | ++++                       | c        | c    | c  | c         | c       | c     | c       | c        | c   | c    | c      | c   | c       | c     | c       | c    | c    | c       | c         | c       | c        | c        | c         |
| c                                | 4872964                  | c                       | 4985324                 | t                        | 5054070                  | s                 | EDL933                     | rec65               | c                                    | EDL933                               | ++++                       | c        | c    | c  | c         | c       | c     | c       | c        | c   | c    | c      | c   | c       | c     | c       | c    | c    | c       | c         | c       | c        | c        | c         |
| a                                | 4905594                  | a                       | 5017954                 | g                        | 5086700                  | nc                | EDL933                     | rec66               | a                                    | EDL933                               | ++                         | a        | g    | g  | a         | g       | a     | a       | a        | g   | g    | g      | g   | g       | g     | g       | a    | g    | g       | g         | g       | g        | g        | g         |
| c                                | 4905598                  | c                       | 5017958                 | g                        | 5086704                  | nc                | EDL933                     | rec66               | c                                    | EDL933                               | ++                         | c        | g    | g  | c         | c       | c     | c       | c        | g   | g    | g      | g   | g       | g     | g       | c    | g    | g       | g         | g       | g        | g        | g         |
| c                                | 4905602                  | c                       | 5017962                 | t                        | 5086708                  | nc                | EDL933                     | rec66               | t                                    | 2                                    | -                          | g        | t    | t  | c         | t       | c     | c       | c        | t   | t    | t      | t   | t       | t     | t       | c    | t    | t       | t         | t       | t        | t        | t         |
| g                                | 4905611                  | g                       | 5017971                 | a                        | 5086717                  | nc                | EDL933                     | rec66               | g                                    | EDL933                               | ++++                       | c        | g    | g  | g         | g       | g     | g       | g        | g   | g    | g      | g   | g       | g     | g       | g    | g    | g       | g         | g       | g        | g        | g         |
| a                                | 4905612                  | a                       | 5017972                 | g                        | 5086718                  | nc                | EDL933                     | rec66               | g                                    | 2                                    | -                          | g        | a    | a  | a         | a       | a     | a       | a        | a   | a    | a      | a   | a       | a     | a       | a    | a    | a       | a         | a       | a        | a        | a         |
| t                                | 4905613                  | t                       | 5017973                 | a                        | 5086719                  | nc                | EDL933                     | rec66               | a                                    | 2                                    | -                          | a        | a    | a  | t         | a       | t     | t       | a        | a   | a    | a      | a   | a       | a     | a       | t    | a    | a       | a         | a       | a        | a        | a         |
| t                                | 4905614                  | t                       | 5017974                 | a                        | 5086720                  | nc                | EDL933                     | rec66               | t                                    | EDL933                               | ++++                       | g        | t    | t  | t         | t       | t     | t       | t        | t   | t    | t      | t   | t       | t     | t       | t    | t    | t       | t         | t       | t        | t        | t         |
| g                                | 4905615                  | g                       | 5017975                 | t                        | 5086721                  | nc                | EDL933                     | rec66               | g                                    | EDL933                               | +++                        | g        | -    | -  | g         | -       | -     | -       | -        | -   | -    | -      | -   | -       | -     | -       | g    | -    | -       | -         | -       | -        | -        | -         |
| t                                | 4905630                  | t                       | 5017990                 | c                        | 5086736                  | nc                | EDL933                     | rec66               | t                                    | EDL933                               | ++                         | t        | c    | c  | t         | c       | t     | t       | c        | c   | c    | c      | c   | c       | c     | c       | t    | c    | c       | c         | c       | c        | c        | c         |
| a                                | 5179986                  | c                       | 5331593                 | c                        | 5361578                  | ns                | O157                       | rec67               | a                                    | O157                                 | +                          | a        |      |    |           |         |       |         |          |     |      |        |     |         |       |         |      |      |         |           |         |          |          |           |
| g                                | 5179992                  | a                       | 5331599                 | a                        | 5361584                  | ns                | O157                       | rec67               | a                                    | O157                                 | +                          | g        |      |    |           |         |       |         |          |     |      |        |     |         |       |         |      |      |         |           |         |          |          |           |
| t                                | 5180004                  | -                       | 5331610                 | c                        | 5361596                  | ns                | O157                       | rec67               | t                                    | EDL933                               | +                          | a        |      |    |           |         |       |         |          |     |      |        |     |         |       |         |      |      |         |           |         |          |          |           |
| c                                | 5180005                  | -                       | 5331610                 | t                        | 5361597                  | ns                | O157                       | rec67               | c                                    | O157                                 | +                          | t        |      |    |           |         |       |         |          |     |      |        |     |         |       |         |      |      |         |           |         |          |          |           |
| g                                | 5180006                  | -                       | 5331610                 | a                        | 5361598                  | ns                | O157                       | rec67               | g                                    | O157                                 | +                          | a        |      |    |           |         |       |         |          |     |      |        |     |         |       |         |      |      |         |           |         |          |          |           |
| g                                | 5180010                  | -                       | 5331610                 | a                        | 5361602                  | ns                | O157                       | rec67               | g                                    | EDL933                               | +++                        | g        |      |    |           |         |       |         |          |     |      |        |     |         |       |         |      |      |         |           |         |          |          |           |
| t                                | 5180022                  | a                       | 5331611                 | a                        | 5361614                  | ns                | O157                       | rec67               | t                                    | O157                                 | +                          | a        |      |    |           |         |       |         |          |     |      |        |     |         |       |         |      |      |         |           |         |          |          |           |
| c                                | 5180023                  | t                       | 5331612                 | t                        | 5361615                  | ns                | O157                       | rec67               | c                                    | O157                                 | +                          | t        |      |    |           |         |       |         |          |     |      |        |     |         |       |         |      |      |         |           |         |          |          |           |
| g                                | 5180024                  | a                       | 5331613                 | a                        | 5361616                  | ns                | O157                       | rec67               | g                                    | O157                                 | +                          | a        |      |    |           |         |       |         |          |     |      |        |     |         |       |         |      |      |         |           |         |          |          |           |
| g                                | 5180028                  | a                       | 5331617                 | a                        | 5361620                  | ns                | O157                       | rec67               | g                                    | O157                                 | +                          | a        |      |    |           |         |       |         |          |     |      |        |     |         |       |         |      |      |         |           |         |          |          |           |
| t                                | 5180040                  | a                       | 5331629                 | a                        | 5361632                  | ns                | O157                       | rec67               | t                                    | O157                                 | +                          | t        |      |    |           |         |       |         |          |     |      |        |     |         |       |         |      |      |         |           |         |          |          |           |
| c                                | 5180041                  | t                       | 5331630                 | t                        | 5361633                  | ns                | O157                       | rec67               | c                                    | O157                                 | +                          | c        |      |    |           |         |       |         |          |     |      |        |     |         |       |         |      |      |         |           |         |          |          |           |
| g                                | 5180042                  | a                       | 5331631                 | a                        | 5361634                  | ns                | O157                       | rec67               | ?                                    | O55/O157                             | +/-                        | t        |      |    |           |         |       |         |          |     |      |        |     |         |       |         |      |      |         |           |         |          |          |           |

<sup>a</sup> color in the table: white: the snps in unallocated blocks; green: the snps that supported the allocation of block; red: the snps that conflicted with the allocation of block; yellow: the unallocated snps or snps that imply 2 mutations at that site - eg in the ancestor of O55 and O157 strains before isolation and again in one of the lineages in the allocated blocks.

<sup>b</sup> Numbers in place of bases indicates number of bases where >2 bases inserted or deleted. In these cases "-" indicates absence of these bases.

<sup>c</sup> For indels the base indicated is the base before the insertion or deletion in the strain.

<sup>d</sup> s: synonymous; ns: non-synonymous; nc: in non-coding gene; i: intergenic; ins: small insert; del: small deletion; indel: the small indels that can't be allocated

<sup>e</sup> O157: allocated to the lineage to the ancestor of EDL933 and Sakai; Sakai/EDL933: allocated to the divergence between Sakai and EDL933 (strain not specified); O55/O157: allocated to the divergence between O55 and O157 lineages (lineage not specified). 2: snps that imply 2 mutations at that site

<sup>f</sup> The recombinational block was allocated if more than 80% of the snps in it can be allocated into the same lineage. For rec53, 56, 64, 66, there is support for 2 mutations at one site. These blocks were allocated to be the most probable lineage.

<sup>g</sup> The base in O55/O157 ancestor as inferred from outgroup analysis.

<sup>h</sup> Level of support for allocation of mutation as given in previous column

+++ agreement is high - 8 or more outgroup strains with expected base and at most 1 with an alternative base, and do not present alternative base in D1 Sd197

++ agreement good - 4 or more outgroup strains with expected base and at most 1 with an alternative base, and do not present alternative base in D1 Sd197

+ agreement in D1 Sd197 regardless of situation with other outgroup strains

+/- no conflict but very limited support as either site absent in D1 Sd197, and/or support is less than for any of the higher levels of support

- conflict data implies 2 mutations at that site - eg in the ancestor of O55 and O157 strains before isolation and again in one of the lineages.

IUPAC those insertions due to error in EDL933 sequence

<sup>i</sup> Base, number or "-" indicates the base type or absence of the base. Blank means the site not present.
