# Supplementary material for: Derivation of Escherichia coli O157:H7 from Its O55:H7 Precursor
Source: PLoS One. 2010 Jan 14;5(1):e8700. doi: 10.1371/journal.pone.0008700 (PMC2806823; doi:10.1371/journal.pone.0008700)
Supplement: Table S7 — Virtual outgroup analysis for allocation of mutational single nucleotide polymorphisms and small indels to the UTI189, S88, or APEC 01 lineages. The 23 genomes used for the analysis are shown, with details of the base or bases present in both outgroup genomes and genomes under analysis, and also the final allocation and a measure of support level for that allocation. (0.08 MB PDF) [file pone.0008700.s009.pdf]

Table S7. Allocation of mutational SNPs to lineages by virtual outgroup analysis

[illegible]

Table S7. Allocation of mutational SNPs to lineages by virtual outgroup analysis

| ExPEC Cluster      |                         |                      |                           |                  |                       | Outgroup Strains <sup>g</sup> |                                      |                                         |                            |        |      |     |          |         |       |        |      |           |    |          |        |       |        |      |         |      |          |         |           |         |          |           |   |
|--------------------|-------------------------|----------------------|---------------------------|------------------|-----------------------|-------------------------------|--------------------------------------|-----------------------------------------|----------------------------|--------|------|-----|----------|---------|-------|--------|------|-----------|----|----------|--------|-------|--------|------|---------|------|----------|---------|-----------|---------|----------|-----------|---|
| UT189 <sup>a</sup> | UT189 site <sup>b</sup> | APEC 01 <sup>a</sup> | APEC 01 site <sup>b</sup> | S88 <sup>a</sup> | S88 site <sup>b</sup> | type <sup>c</sup>             | Inferred ancestral base <sup>d</sup> | Lineage inferred to mutate <sup>e</sup> | Support level <sup>f</sup> | CFT073 | ED1a | 536 | E2348/69 | SMS 3-5 | IAI39 | UMN026 | K-12 | ATCC 8739 | HS | D1 Sd197 | CB9615 | Sakai | EDL933 | IAI1 | E24377A | SE11 | SS Ss046 | F2a 301 | F2a 2457T | F5 8401 | B4 Sd227 | B18 BS512 |   |
| c                  | 280815                  | t                    | 280794                    | t                | 280814                | ns                            | c                                    | AS                                      | ++++                       | c      | c    | c   | c        | c       | c     | c      | c    | c         | c  | c        | c      | c     | c      | c    | c       | c    | c        | c       | c         | c       | c        | c         |   |
| c                  | 309874                  | t                    | 311464                    | t                | 299239                | nc                            | c                                    | AS                                      | ++                         | c      | c    | c   | c        | c       | c     | c      | c    | c         | c  | c        | c      | c     | c      | c    | c       | c    | c        | c       | c         | c       | c        | c         |   |
| 1                  | 310009                  | -                    | 311598                    | -                | 299373                | ins                           | -                                    | UT189                                   | ++                         | -      | -    | -   | -        | -       | -     | -      | -    | -         | -  | -        | -      | -     | -      | -    | -       | -    | -        | -       | -         | -       | -        | -         |   |
| g                  | 311554                  | g                    | 313143                    | a                | 300918                | nc                            | g                                    | S88                                     | ++                         | g      | g    | g   | g        | g       | g     | g      | g    | g         | g  | g        | g      | g     | g      | g    | g       | g    | g        | g       | g         | g       | g        | g         |   |
| a                  | 313568                  | c                    | 315157                    | a                | 302932                | nc                            | a                                    | APEC                                    | ++++                       | a      | a    | a   | a        | a       | a     | a      | a    | a         | a  | a        | a      | a     | a      | a    | a       | a    | a        | a       | a         | a       | a        | a         |   |
| c                  | 320771                  | c                    | 322360                    | g                | 310135                | ns                            | c                                    | S88                                     | ++++                       | c      | c    | c   | c        | c       | c     | c      | c    | c         | c  | c        | c      | c     | c      | c    | c       | c    | c        | c       | c         | c       | c        | c         |   |
| t                  | 320925                  | c                    | 322514                    | c                | 310289                | ns                            | c                                    | UT189                                   | ++++                       | c      | c    | c   | c        | c       | c     | c      | c    | c         | c  | c        | c      | c     | c      | c    | c       | c    | c        | c       | c         | c       | c        | c         |   |
| -                  | 321246                  | 1                    | 322845                    | 1                | 310620                | del                           | 1                                    | UT189                                   | ++++                       | 1      | 1    | 1   | 1        | 1       | 1     | 1      | 1    | 1         | 1  | 1        | 1      | 1     | 1      | 1    | 1       | 1    | 1        | 1       | 1         | 1       | 1        | 1         |   |
| a                  | 322177                  | g                    | 323767                    | a                | 311542                | nc                            | a                                    | APEC                                    | ++                         | a      | a    | a   | a        | a       | a     | a      | a    | a         | a  | a        | a      | a     | a      | a    | a       | a    | a        | a       | a         | a       | a        | a         |   |
| a                  | 324320                  | g                    | 325910                    | a                | 313685                | s                             | a                                    | APEC                                    | ++++                       | a      | a    | a   | a        | a       | a     | a      | a    | a         | a  | a        | a      | a     | a      | a    | a       | a    | a        | a       | a         | a       | a        | a         |   |
| c                  | 328733                  | c                    | 330323                    | t                | 318098                | nc                            | c                                    | S88                                     | +++                        | c      | c    | c   | c        | c       | c     | c      | c    | c         | c  | c        | c      | c     | c      | c    | c       | c    | c        | c       | c         | c       | c        | c         |   |
| g                  | 329587                  | a                    | 331177                    | a                | 318952                | s                             | g                                    | AS                                      | +++                        | g      | g    | g   | g        | g       | g     | g      | g    | g         | g  | g        | g      | g     | g      | g    | g       | g    | g        | g       | g         | g       | g        | g         |   |
| c                  | 332304                  | t                    | 333894                    | t                | 321669                | s                             | c                                    | AS                                      | ++                         | c      | c    | c   | c        | c       | c     | c      | c    | c         | c  | c        | c      | c     | c      | c    | c       | c    | c        | c       | c         | c       | c        | c         |   |
| t                  | 336518                  | c                    | 338108                    | c                | 325883                | nc                            | t                                    | AS                                      | ++++                       | t      | t    | t   | t        | t       | t     | t      | t    | t         | t  | t        | t      | t     | t      | t    | t       | t    | t        | t       | t         | t       | t        | t         |   |
| a                  | 339541                  | g                    | 341131                    | g                | 328906                | ns                            | g                                    | UT189                                   | ++++                       | g      | g    | g   | g        | g       | g     | g      | g    | g         | g  | g        | g      | g     | g      | g    | g       | g    | g        | g       | g         | g       | g        | g         |   |
| -                  | 342481                  | 1                    | 344072                    | -                | 331846                | ins                           | -                                    | APEC                                    | ++++                       | -      | -    | -   | -        | -       | -     | -      | -    | -         | -  | -        | -      | -     | -      | -    | -       | -    | -        | -       | -         | -       | -        | -         |   |
| t                  | 342623                  | c                    | 344214                    | c                | 331988                | ns                            | c                                    | UT189                                   | ++++                       | c      | c    | c   | c        | c       | c     | c      | c    | c         | c  | c        | c      | c     | c      | c    | c       | c    | c        | c       | c         | c       | c        | c         |   |
| -                  | 344595                  | 1                    | 346196                    | 1                | 333970                | del                           | 1                                    | UT189                                   | ++++                       | 1      | 1    | 1   | 1        | 1       | 1     | 1      | 1    | 1         | 1  | 1        | 1      | 1     | 1      | 1    | 1       | 1    | 1        | 1       | 1         | 1       | 1        | 1         |   |
| a                  | 349665                  | g                    | 351257                    | a                | 339031                | nc                            | a                                    | APEC                                    | +++                        | a      | a    | a   | a        | a       | a     | a      | a    | a         | a  | a        | a      | a     | a      | a    | a       | a    | a        | a       | a         | a       | a        | a         |   |
| -                  | 350806                  | -                    | 352407                    | 1                | 340182                | ins                           | -                                    | S88                                     | ++                         | -      | -    | -   | -        | -       | -     | -      | -    | -         | -  | -        | -      | -     | -      | -    | -       | -    | -        | -       | -         | -       | -        | -         |   |
| g                  | 357087                  | t                    | 358679                    | t                | 346454                | s                             | g                                    | AS                                      | ++++                       | g      | g    | g   | g        | g       | g     | g      | g    | g         | g  | g        | g      | g     | g      | g    | g       | g    | g        | g       | g         | g       | g        | g         |   |
| c                  | 363910                  | t                    | 365502                    | t                | 353277                | s                             | c                                    | AS                                      | ++                         | c      | c    | c   | c        | c       | c     | c      | c    | c         | c  | c        | c      | c     | c      | c    | c       | c    | c        | c       | c         | c       | c        | c         |   |
| a                  | 364638                  | g                    | 366230                    | g                | 354005                | s                             | a                                    | AS                                      | ++++                       | a      | a    | a   | a        | a       | a     | a      | a    | a         | a  | a        | a      | a     | a      | a    | a       | a    | a        | a       | a         | a       | a        | a         |   |
| g                  | 366733                  | a                    | 368325                    | g                | 356100                | ns                            | g                                    | APEC                                    | ++++                       | g      | g    | g   | g        | g       | g     | g      | g    | g         | g  | g        | g      | g     | g      | g    | g       | g    | g        | g       | g         | g       | g        | g         |   |
| a                  | 367643                  | a                    | 369235                    | c                | 357010                | ns                            | a                                    | S88                                     | ++++                       | a      | a    | a   | a        | a       | a     | a      | a    | a         | a  | a        | a      | a     | a      | a    | a       | a    | a        | a       | a         | a       | a        | a         |   |
| t                  | 377150                  | c                    | 378742                    | c                | 366517                | nc                            | c                                    | UT189                                   | ++                         | c      | c    | c   | c        | c       | c     | c      | c    | c         | c  | c        | c      | c     | c      | c    | c       | c    | c        | c       | c         | c       | c        | c         |   |
| a                  | 378067                  | g                    | 379659                    | g                | 367434                | nc                            | g                                    | UT189                                   | ++++                       | g      | g    | g   | g        | g       | g     | g      | g    | g         | g  | g        | g      | g     | g      | g    | g       | g    | g        | g       | g         | g       | g        | g         |   |
| c                  | 386225                  | c                    | 387817                    | t                | 375592                | s                             | c                                    | S88                                     | ++++                       | c      | c    | c   | c        | c       | c     | c      | c    | c         | c  | c        | c      | c     | c      | c    | c       | c    | c        | c       | c         | c       | c        | c         | c |
| c                  | 386235                  | t                    | 387827                    | t                | 375602                | s                             | t                                    | UT189                                   | ++++                       | t      | t    | t   | t        | t       | t     | t      | t    | t         | t  | t        | t      | t     | t      | t    | t       | t    | t        | t       | t         | t       | t        | t         |   |
| t                  | 389340                  | a                    | 390932                    | t                | 378707                | ns                            | t                                    | APEC                                    | ++++                       | t      | t    | t   | t        | t       | t     | t      | t    | t         | t  | t        | t      | t     | t      | t    | t       | t    | t        | t       | t         | t       | t        | t         |   |
| -                  | 392256                  | 1                    | 393849                    | -                | 381623                | ins                           | -                                    | APEC                                    | ++++                       | 1      | -    | -   | -        | -       | -     | -      | -    | -         | -  | -        | -      | -     | -      | -    | -       | -    | -        | -       | -         | -       | -        | -         |   |
| c                  | 395358                  | t                    | 396951                    | c                | 384725                | s                             | c                                    | APEC                                    | ++                         | c      | c    | c   | c        | c       | c     | c      | c    | c         | c  | c        | c      | c     | c      | c    | c       | c    | c        | c       | c         | c       | c        | c         |   |
| g                  | 398289                  | a                    | 399882                    | a                | 387656                | ns                            | g                                    | AS                                      | ++++                       | g      | g    | g   | g        | g       | g     | g      | g    | g         | g  | g        | g      | g     | g      | g    | g       | g    | g        | g       | g         | g       | g        | g         |   |
| a                  | 399075                  | g                    | 400668                    | g                | 388442                | ns                            | g                                    | UT189                                   | ++++                       | g      | g    | g   | g        | g       | g     | g      | g    | g         | g  | g        | g      | g     | g      | g    | g       | g    | g        | g       | g         | g       | g        | g         | g |
| 5                  | 400318                  | -                    | 401910                    | 5                | 389685                | del                           | 5                                    | APEC                                    | ++++                       | 5      | 5    | 5   | 5        | 5       | 5     | 5      | 5    | 5         | 5  | 5        | 5      | 5     | 5      | 5    | 5       | 5    | 5        | 5       | 5         | 5       | 5        | 5         |   |
| c                  | 405375                  | a                    | 406963                    | c                | 394742                | nc                            | c                                    | APEC                                    | ++                         | c      | c    | c   | c        | c       | c     | c      | c    | c         | c  | c        | c      | c     | c      | c    | c       | c    | c        | c       | c         | c       | c        | c         |   |
| c                  | 407688                  | t                    | 409276                    | c                | 397055                | s                             | c                                    | APEC                                    | ++++                       | c      | c    | c   | c        | c       | c     | c      | c    | c         | c  | c        | c      | c     | c      | c    | c       | c    | c        | c       | c         | c       | c        | c         | c |
| 1                  | 415505                  | 1                    | 417103                    | -                | 404881                | del                           | -                                    | S88                                     | -                          | 1      | -    | -   | -        | -       | -     | -      | -    | -         | -  | -        | -      | -     | -      | -    | -       | -    | -        | -       | -         | -       | -        | -         |   |
| c                  | 416081                  | t                    | 417669                    | c                | 405447                | ns                            | c                                    | APEC                                    | ++++                       | c      | c    | c   | c        | c       | c     | c      | c    | c         | c  | c        | c      | c     | c      | c    | c       | c    | c        | c       | c         | c       | c        | c         |   |
| g                  | 419774                  | g                    | 421362                    | a                | 409140                | s                             | g                                    | S88                                     | ++++                       | g      | g    | g   | g        | g       | g     | g      | g    | g         | g  | g        | g      | g     | g      | g    | g       | g    | g        | g       | g         | g       | g        | g         |   |
| t                  | 423277                  | a                    | 424865                    | t                | 412643                | nc                            | t                                    | APEC                                    | ++++                       | t      | t    | t   | t        | t       | t     | t      | t    | t         | t  | t        | t      | t     | t      | t    | t       | t    | t        | t       | t         | t       | t        | t         |   |
| -                  | 424186                  | 1                    | 425775                    | -                | 413552                | ins                           | -                                    | APEC                                    | ++++                       | -      | -    | -   | -        | -       | -     | -      | -    | -         | -  | -        | -      | -     | -      | -    | -       | -    | -        | -       | -         | -       | -        | -         |   |
| g                  | 425766                  | g                    | 427355                    | c                | 415132                | ns                            | g                                    | S88                                     | ++++                       | g      | g    | g   | g        | g       | g     | g      | g    | g         | g  | g        | g      | g     | g      | g    | g       | g    | g        | g       | g         | g       | g        | g         |   |
| c                  | 430783                  | t                    | 432372                    | c                | 420149                | ns                            | c                                    | APEC                                    | ++++                       | c      | c    | c   | c        | c       | c     | c      | c    | c         | c  | c        | c      | c     | c      | c    | c       | c    | c        | c       | c         | c       | c        | c         |   |
| t                  | 432469                  | c                    | 434058                    | c                | 421835                | ns                            | c                                    | UT189                                   | ++++                       | c      | c    | c   | c        | c       | c     | c      | c    | c         | c  | c        | c      | c     | c      | c    | c       | c    | c        | c       | c         | c       | c        | c         | c |
| c                  | 432619                  | t                    | 434208                    | c                | 421985                | ns                            | c                                    | APEC                                    | ++++                       | c      | c    | c   | c        | c       | c     | c      | c    | c         | c  | c        | c      | c     | c      | c    | c       | c    | c        | c       | c         | c       | c        | c         | c |
| c                  | 433304                  | t                    | 434893                    | t                | 422670                | s                             | t                                    | UT189                                   | ++++                       | t      | t    | t   | t        | t       | t     | t      | t    | t         | t  | t        | t      | t     | t      | t    | t       | t    | t        | t       | t         | t       | t        | t         |   |
| c                  | 437960                  | a                    | 439549                    | c                | 427326                | s                             | c                                    | APEC                                    | ++++                       | c      | c    | c   | c        | c       | c     | c      | c    | c         | c  | c        | c      | c     | c      | c    | c       | c    | c        | c       | c         | c       | c        | c         | c |
| c                  | 440108                  | g                    | 441697                    | c                | 429474                | ns                            | c                                    | APEC                                    | ++++                       | c      | c    | c   | c        | c       | c     | c      | c    | c         | c  | c        | c      | c     | c      | c    | c       | c    | c        | c       | c         | c       | c        | c         | c |
| t                  | 442626                  | c                    | 444215                    | c                | 431992                | s                             | c                                    | UT189                                   | ++++                       | c      | c    | c   | c        | c       | c     | c      | c    | c         | c  | c        | c      | c     | c      | c    | c       | c    | c        | c       | c         | c       | c        | c         | c |
| c                  | 454656                  | t                    | 456245                    | c                | 444022                | ns                            | c                                    | APEC                                    | ++++                       | c      | c    | c   | c        | c       | c     | c      | c    | c         | c  | c        | c      | c     | c      | c    | c       | c    | c        | c       | c         | c       | c        | c         | c |
| t                  | 456678                  | c                    | 458267                    | c                | 446044                | s                             | c                                    | UT189                                   | ++                         | c      | c    | c   | c        | c       | c     | c      | c    | c         | c  | c        | c      | c     | c      | c    | c       | c    | c        | c       | c         | c       | c        | c         | c |
| -                  | 464820                  | -                    | 466418                    | g                | 454196                | ins                           | -                                    | S88                                     | ++++                       | -      | -    | -   | -        | -       | -     | -      | -    | -         | -  | -        | -      | -     | -      | -    | -       | -    | -        | -       | -         | -       | -        | -         |   |
| -                  | 464829                  | g                    | 466419                    | g                | 454205                | ins                           | -                                    | AS                                      | ++                         | g      | -    | -   | -        | -       | -     | -      | -    | -         | -  | -        | -      | -     | -      | -    | -       | -    | -        | -       | -         | -       | -        | -         |   |
| g                  | 473065                  | a                    | 474663                    | a                | 462449                | s                             | g                                    | AS                                      | ++++                       | g      | g    | g   | g        | g       | g     | g      | g    | g         | g  | g        | g      | g     | g      | g    | g       | g    | g        | g       | g         | g       | g        | g         |   |
| t                  | 473288                  | g                    | 474886                    | g                | 462672                | ns                            | t                                    | AS                                      | ++++                       | t      | t    | t   | t        | t       | t     | t      | t    | t         | t  | t        | t      | t     | t      | t    | t       | t    | t        | t       | t         | t       | t        | t         |   |
| c                  | 482361                  | t                    | 483959                    | t                | 471745                | nc                            | c                                    | AS                                      | ++                         | c      | c    | c   | c        | c       | c     | c      | c    | c         | c  | c        | c      | c     | c      | c    | c       | c    | c        | c       | c         | c       | c        | c         |   |
| g                  | 483535                  | a                    | 485133                    | g                | 472919                | ns                            | g                                    | APEC                                    | ++++                       | g      | g    | g   | g        | g       | g     | g      | g    | g         | g  | g        | g      | g     | g      | g    | g       | g    | g        | g       | g         | g       | g        | g         | g |
| g                  | 491700                  | a                    | 493298                    | g                | 481084                | s                             | g                                    | APEC                                    | ++                         | g      | g    | g   |          |         |       |        |      |           |    |          |        |       |        |      |         |      |          |         |           |         |          |           |   |

Table S7. Allocation of mutational SNPs to lineages by virtual outgroup analysis

[illegible]

| ExPEC Cluster      |                         |                      |                           |                  |                       |                   |                                      |                                         |                            | Outgroup Strains <sup>g</sup> |      |     |          |         |       |        |      |           |    |          |        |       |        |      |         |      |           |         |           |         |          |           |   |
|--------------------|-------------------------|----------------------|---------------------------|------------------|-----------------------|-------------------|--------------------------------------|-----------------------------------------|----------------------------|-------------------------------|------|-----|----------|---------|-------|--------|------|-----------|----|----------|--------|-------|--------|------|---------|------|-----------|---------|-----------|---------|----------|-----------|---|
| UT189 <sup>a</sup> | UT189 site <sup>b</sup> | APEC 01 <sup>a</sup> | APEC 01 site <sup>b</sup> | S88 <sup>a</sup> | S88 site <sup>b</sup> | type <sup>c</sup> | Inferred ancestral base <sup>d</sup> | Lineage inferred to mutate <sup>e</sup> | Support level <sup>f</sup> | CF7073                        | ED1a | 536 | E2348/69 | SMS 3-5 | IAI39 | UMN026 | K-12 | ATCC 8739 | HS | D1 Sd197 | CB9615 | Sakai | EDL933 | IAI1 | E24377A | SE11 | SS Sso046 | F2a 301 | F2a 245/T | F5 8401 | B4 Sb227 | B18 BS512 |   |
| g                  | 975980                  | a                    | 974947                    | g                | 978536                | ns                | g                                    | APEC                                    | ++++                       | g                             | g    | g   | g        | g       | g     | g      | g    | g         | g  | g        | g      | g     | g      | g    | g       | g    | g         | g       | g         | g       | g        | g         |   |
| c                  | 977458                  | c                    | 976425                    | t                | 980014                | ns                | c                                    | S88                                     | ++++                       | c                             | c    | c   | c        | c       | c     | c      | c    | c         | c  | c        | c      | c     | c      | c    | c       | c    | c         | c       | c         | c       | c        | c         |   |
| t                  | 978577                  | c                    | 977544                    | c                | 981133                | ns                | c                                    | UT189                                   | ++++                       | c                             | c    | c   | c        | c       | c     | c      | c    | c         | c  | c        | c      | c     | c      | c    | c       | c    | c         | c       | c         | c       | c        | c         |   |
| c                  | 980226                  | c                    | 979193                    | t                | 982782                | ns                | c                                    | S88                                     | ++++                       | c                             | c    | c   | c        | c       | c     | c      | c    | c         | c  | c        | c      | c     | c      | c    | c       | c    | c         | c       | c         | c       | c        | c         |   |
| c                  | 997585                  | c                    | 996552                    | a                | 1000141               | nc                | c                                    | S88                                     | ++++                       | c                             | c    | c   | c        | c       | c     | c      | c    | c         | c  | c        | c      | c     | c      | c    | c       | c    | c         | c       | c         | c       | c        | c         |   |
| t                  | 1001866                 | c                    | 1000833                   | c                | 1004422               | s                 | c                                    | UT189                                   | ++++                       | c                             | c    | c   | c        | c       | c     | c      | c    | c         | c  | c        | c      | c     | c      | c    | c       | c    | c         | c       | c         | c       | c        | c         |   |
| a                  | 1005106                 | g                    | 1004073                   | a                | 1007662               | nc                | a                                    | APEC                                    | ++++                       | a                             | a    | a   | a        | a       | a     | a      | a    | a         | a  | a        | a      | a     | a      | a    | a       | a    | a         | a       | a         | a       | a        | a         |   |
| c                  | 1008991                 | t                    | 1007958                   | t                | 1011547               | s                 | c                                    | AS                                      | ++++                       | c                             | c    | c   | c        | c       | c     | c      | c    | c         | c  | c        | c      | c     | c      | c    | c       | c    | c         | c       | c         | c       | c        | c         |   |
| a                  | 1009299                 | a                    | 1008266                   | g                | 1011855               | nc                | a                                    | S88                                     | ++++                       | a                             | a    | a   | a        | a       | a     | a      | a    | a         | a  | a        | a      | a     | a      | a    | a       | a    | a         | a       | a         | a       | a        | a         |   |
| g                  | 1017505                 | g                    | 1016472                   | a                | 1020061               | nc                | g                                    | S88                                     | ++                         | g                             | g    | g   | g        | g       | g     | g      | g    | g         | g  | g        | g      | g     | g      | g    | g       | g    | g         | g       | g         | g       | g        | g         |   |
| g                  | 1023013                 | g                    | 1021980                   | a                | 1025569               | ns                | g                                    | S88                                     | ++++                       | g                             | g    | g   | g        | g       | g     | g      | g    | g         | g  | g        | g      | g     | g      | g    | g       | g    | g         | g       | g         | g       | g        | g         |   |
| g                  | 1023423                 | t                    | 1022390                   | t                | 1025979               | s                 | t                                    | UT189                                   | ++                         | c                             | t    | c   | g        | t       | c     | c      | t    | t         | t  | t        | t      | t     | t      | t    | t       | t    | t         | t       | t         | t       | t        | t         |   |
| t                  | 1027187                 | c                    | 1026154                   | c                | 1029743               | ns                | c                                    | UT189                                   | ++++                       | c                             | c    | c   | c        | c       | c     | c      | c    | c         | c  | c        | c      | c     | c      | c    | c       | c    | c         | c       | c         | c       | c        | c         | c |
| 1                  | 1027219                 | 1                    | 1026196                   | -                | 1029784               | del               | 1                                    | S88                                     | ++++                       | 1                             | 1    | 1   | 1        | 1       | 1     | 1      | 1    | 1         | 1  | 1        | 1      | 1     | 1      | 1    | 1       | 1    | 1         | 1       | 1         | 1       | 1        | 1         |   |
| t                  | 1036972                 | c                    | 1035939                   | t                | 1039527               | ns                | t                                    | APEC                                    | ++++                       | t                             | t    | t   | t        | t       | t     | t      | t    | t         | t  | t        | t      | t     | t      | t    | t       | t    | t         | t       | t         | t       | t        | t         |   |
| 10                 | 1046266                 | -                    | 1045232                   | -                | 1048820               | del               | 10                                   | AS                                      | ++                         | 10                            | 10   | 10  | -        | -       | 10    | 10     | -    | -         | -  | -        | -      | -     | -      | -    | -       | -    | -         | 10      | 10        | 10      | -        | -         |   |
| c                  | 1050612                 | t                    | 1049569                   | t                | 1053157               | s                 | c                                    | AS                                      | ++++                       | c                             | c    | c   | c        | c       | c     | c      | c    | c         | c  | c        | c      | c     | c      | c    | c       | c    | c         | c       | c         | c       | c        | c         |   |
| c                  | 1070356                 | t                    | 1069313                   | c                | 1072901               | s                 | c                                    | APEC                                    | ++++                       | c                             | c    | c   | c        | c       | c     | c      | c    | c         | c  | c        | c      | c     | c      | c    | c       | c    | c         | c       | c         | c       | c        | c         |   |
| c                  | 1071203                 | t                    | 1070160                   | t                | 1073748               | ns                | c                                    | AS                                      | ++++                       | c                             | c    | c   |          |         |       |        |      |           |    |          |        |       |        |      |         |      |           |         |           |         |          |           |   |

Table S7. Allocation of mutational SNPs to lineages by virtual outgroup analysis

| ExPEC Cluster      |                         |                      |                           |                  |                       | Outgroup Strains <sup>g</sup> |                                      |                                         |                            |        |      |     |          |         |       |        |      |           |    |          |        |       |        |     |         |      |          |         |           |         |          |           |
|--------------------|-------------------------|----------------------|---------------------------|------------------|-----------------------|-------------------------------|--------------------------------------|-----------------------------------------|----------------------------|--------|------|-----|----------|---------|-------|--------|------|-----------|----|----------|--------|-------|--------|-----|---------|------|----------|---------|-----------|---------|----------|-----------|
| UTI89 <sup>a</sup> | UTI89 site <sup>b</sup> | APEC 01 <sup>a</sup> | APEC 01 site <sup>b</sup> | S88 <sup>a</sup> | S88 site <sup>b</sup> | type <sup>c</sup>             | Inferred ancestral base <sup>d</sup> | Lineage inferred to mutate <sup>e</sup> | Support level <sup>f</sup> | CFT073 | ED1a | 536 | E2348/69 | SMS 3-5 | IAI39 | UMN026 | K-12 | ATCC 8739 | HS | D1 Sd197 | CB9615 | Sakai | ED1933 | IA1 | E24377A | SE11 | SS Ss046 | F2a 301 | F2a 2457T | F5 8401 | B4 Sd227 | B18 BS512 |
| c                  | 1351918                 | c                    | 1290326                   | t                | 1293938               | s                             | c                                    | S88                                     | ++++                       | c      | c    | c   | c        | c       | c     | c      | c    | c         | c  | c        | c      | c     | c      | c   | c       | c    | c        | c       | c         | c       | t        |           |
| t                  | 1356504                 | t                    | 1294912                   | c                | 1298524               | ns                            | t                                    | S88                                     | ++++                       | t      | t    | t   | t        | t       | t     | t      | t    | t         | t  | t        | t      | t     | t      | t   | t       | t    | t        | t       | t         | t       | t        |           |
| a                  | 1356862                 | g                    | 1295270                   | g                | 1298882               | s                             | g                                    | UTI89                                   | ++                         | g      | g    | g   | g        | g       | g     | g      | a    | a         | a  | a        | a      | a     | a      | a   | a       | a    | a        | a       | a         | a       | a        |           |
| c                  | 1362182                 | t                    | 1300590                   | c                | 1304202               | nc                            | c                                    | APEC                                    | ++++                       | c      | c    | c   | c        | c       | c     | c      | c    | c         | c  | c        | c      | c     | c      | c   | c       | c    | c        | c       | c         | c       | c        |           |
| t                  | 1383331                 | g                    | 1321739                   | g                | 1325351               | ns                            | g                                    | UTI89                                   | ++++                       | g      | g    | g   | g        | g       | g     | g      | g    | g         | g  | g        | g      | g     | g      | g   | g       | g    | g        | g       | g         | g       | g        |           |
| c                  | 1383687                 | t                    | 1322095                   | t                | 1325707               | s                             | c                                    | AS                                      | ++++                       | c      | c    | c   | c        | c       | c     | c      | c    | c         | c  | c        | c      | c     | c      | c   | c       | c    | c        | c       | c         | c       | c        |           |
| a                  | 1396233                 | c                    | 1334641                   | a                | 1338253               | ns                            | a                                    | APEC                                    | +                          | -      | a    |     |          |         |       |        |      |           |    |          |        | a     | a      |     |         | a    |          |         |           |         | a        |           |
| 12                 | 1396238                 | -                    | 1334645                   | 12               | 1338258               | del                           | 12                                   | APEC                                    | ++                         | -      | 12   |     |          |         |       |        |      |           |    |          |        |       | 12     | 12  |         | 12   |          |         |           |         | 12       |           |
| c                  | 1397119                 | a                    | 1335515                   | a                | 1339139               | ns                            | c                                    | AS                                      | ++++                       | c      | c    |     | c        |         | c     | c      |      | c         |    |          | c      |       | c      | c   | c       | c    |          |         |           |         | c        |           |
| t                  | 1397449                 | c                    | 1335845                   | c                | 1339469               | ns                            | ?                                    | UTI89/AS                                | +/-                        |        |      |     |          |         |       |        |      |           |    |          |        |       |        |     |         |      |          |         |           |         |          |           |
| -                  | 1407410                 | 1                    | 1345332                   | 1                | 1349440               | ins                           | -                                    | AS                                      | ++++                       | -      | -    | -   | -        | -       | -     | -      | -    | -         | -  | -        | -      | -     | -      | -   | -       | -    | -        | -       | -         | -       | -        |           |
| -                  | 1409852                 | 1                    | 1347766                   | -                | 1351873               | ins                           | -                                    | APEC                                    | ++                         | -      |      |     |          |         |       |        | 1    | 1         |    |          | 1      | -     | 1      | 1   | 1       | 1    | 1        | 1       | 1         | 1       | 1        |           |
| c                  | 1411572                 | t                    | 1349486                   | c                | 1353593               | s                             | c                                    | APEC                                    | +                          | t      | c    | a   | c        |         | c     | c      | c    | a         |    |          | t      | c     | c      | a   | a       | t    | a        | c       | c         | c       | c        |           |
| g                  | 1411629                 | t                    | 1349543                   | t                | 1353650               | s                             | g                                    | AS                                      | ++                         | g      | g    | g   | g        |         | g     | g      | g    | g         |    |          | g      | g     | g      | g   | g       | t    | g        | a       | a         | a       | t        |           |
| g                  | 1411639                 | t                    | 1349553                   | t                | 1353660               | ns                            | g                                    | AS                                      | ++                         | g      | g    | g   | g        |         | g     | g      | g    | g         |    |          | g      | g     | g      | g   | g       | t    | g        | g       | g         | g       | t        |           |
| 1                  | 1411898                 | 1                    | 1349822                   | -                | 1353928               | del                           | 1                                    | S88                                     | ++++                       | 1      | 1    | 1   | 1        |         | 1     | 1      |      | 1         |    |          | 1      | 1     | 1      | 1   | 1       | 1    | 1        | 1       | 1         | 1       | 1        |           |
| t                  | 1414911                 | a                    | 1352825                   | a                | 1356931               | ns                            | a                                    | UTI89                                   | ++                         | a      | a    |     | t        | a       | a     |        |      |           |    |          | t      | t     | t      |     | a       |      | a        | a       | a         | a       | t        |           |
| t                  | 1415527                 | c                    | 1353441                   | t                | 1357547               | s                             | t                                    | APEC                                    | ++                         | t      | t    | t   | t        | t       | t     |        |      |           |    |          | t      | t     | t      |     | t       |      | c        | c       | c         | c       | t        |           |
| t                  | 1416046                 | g                    | 1353960                   | g                | 1358066               | s                             | g                                    | UTI89                                   | ++                         | g      | g    |     | g        |         | g     | t      |      |           |    |          | g      | g     | g      |     | g       |      | g        | g       | g         | g       | t        |           |
| g                  | 1419751                 | g                    | 1357665                   | a                | 1361762               | ns                            | g                                    | S88                                     | ++++                       | g      | g    | g   | g        |         | g     | g      |      | g         |    |          | g      | g     | g      | g   | g       | g    | g        |         |           |         | g        |           |
| g                  | 1419789                 | t                    | 1357703                   | t                | 1361800               | ns                            | t                                    | UTI89                                   | ++                         | t      | t    | c   | c        | t       | t     |        |      |           |    |          | c      | t     | t      | c   |         | t    | c        |         |           |         | t        |           |
| t                  | 1422681                 | c                    | 1360595                   | c                | 1364692               | s                             | t                                    | AS                                      | ++                         | t      | g    | t   | t        |         | t     | t      |      | t         |    |          | g      | g     | g      | t   |         | t    | t        |         |           |         | t        |           |
| c                  | 1423327                 | c                    | 1361241                   | a                | 1365338               | ns                            | c                                    | S88                                     | ++++                       | c      | c    | c   | c        |         | c     | c      | c    | c         |    |          | c      | c     | c      | c   | c       | c    | c        |         |           |         | c        |           |
| c                  | 1423914                 | c                    | 1361828                   | c                | 1365925               | ns                            | c                                    | APEC                                    | ++                         | c      | c    | c   | c        | t       | c     | c      |      | c         |    |          | c      | a     | a      | c   |         | c    | c        | c       | c         | c       | c        |           |
| a                  | 1426400                 | g                    | 1364314                   | g                | 1368411               | s                             | g                                    | UTI89                                   | ++++                       | g      | g    | g   | g        | g       | g     | g      |      | g         |    |          | g      | g     | g      | g   | g       | g    | g        | g       | g         | g       | a        |           |
| a                  | 1426526                 | g                    | 1364440                   | g                | 1368537               | s                             | a                                    | AS                                      | ++                         | a      | g    | a   | g        | g       | g     | g      |      | g         |    |          | g      | g     | g      | g   | g       | g    | g        | g       | g         | g       | a        |           |
| t                  | 1426565                 | g                    | 1364479                   | g                | 1368576               | s                             | t                                    | AS                                      | ++                         | t      | c    | t   | c        | g       | t     | g      |      | g         |    |          | t      | c     | c      | t   |         | g    | t        | t       | t         | t       | t        |           |
| c                  | 1426574                 | t                    | 1364488                   | t                | 1368585               | s                             | c                                    | AS                                      | ++                         | t      | c    | c   | c        | t       | c     | c      |      | t         |    |          | c      | c     | c      | c   |         | c    | c        | c       | c         | c       | c        |           |
| a                  | 1426637                 | g                    | 1364551                   | g                | 1368648               | s                             | a                                    | AS                                      | ++                         | a      | c    | a   | c        | a       | a     | a      |      | a         |    |          | a      | c     | c      | a   |         | a    | a        | a       | a         | a       | a        |           |
| g                  | 1429230                 | g                    | 1367144                   | a                | 1371241               | ns                            | g                                    | S88                                     | ++++                       | g      | g    |     | g        | g       | g     | g      |      | g         | g  |          | g      | g     | g      | g   | g       | g    | g        | g       | g         | g       | g        |           |
| g                  | 1447820                 | t                    | 1385734                   | g                | 1389831               | ns                            | g                                    | APEC                                    | ++++                       | g      | g    | g   | g        | g       | g     | g      |      | g         | g  | g        | g      | g     | g      | g   | g       | g    | g        | g       | g         | g       | g        |           |
| g                  | 1453371                 | a                    | 1391285                   | g                | 1395382               | s                             | g                                    | APEC                                    | ++++                       | g      | g    | g   | g        | g       | g     | g      |      | g         | g  | g        | g      | g     | g      | g   | g       | g    | g        | g       | g         | g       | g        |           |
| g                  | 1454280                 | g                    | 1392194                   | a                | 1396291               | s                             | g                                    | S88                                     | ++++                       | c      | c    | c   | c        | c       | c     | c      |      | c         | c  | c        | c      | c     | c      | c   | c       | c    | c        | c       | c         | c       | c        |           |
| c                  | 1458464                 | c                    | 1396378                   | t                | 1400475               | s                             | c                                    | S88                                     | ++++                       | c      | c    | c   | c        | c       | c     | c      |      | c         | c  | c        | c      | c     | c      | c   | c       | c    | c        | c       | c         | c       | c        |           |
| c                  | 1462538                 | g                    | 1400452                   | g                | 1404549               | ns                            | c                                    | AS                                      | ++++                       | c      | c    | c   | c        | c       | c     | c      |      | c         | c  | c        | c      | c     | c      | c   | c       | c    | c        | c       | c         | c       | c        |           |
| -                  | 1462662                 | 1                    | 1400586                   | 1                | 1404683               | del                           | 1                                    | UTI89                                   | ++++                       | -      | 1    | 1   | 1        | 1       | 1     | 1      |      | 1         | 1  | 1        | 1      | 1     | 1      | 1   | 1       | 1    | 1        | 1       | 1         | 1       | 1        |           |
| c                  | 1463574                 | t                    | 1401489                   | c                | 1405586               | ns                            | c                                    | APEC                                    | ++++                       | c      | c    | c   | c        | c       | c     | c      |      | c         | c  | c        | c      | c     | c      | c   | c       | c    | c        | c       | c         | c       | c        |           |
| g                  | 1464840                 | a                    | 1402755                   | a                | 1406852               | ns                            | a                                    | UTI89                                   | ++++                       | a      | a    | a   | a        | a       | a     | a      |      | a         | a  | a        | a      | a     | a      | a   | a       | a    | a        | a       | a         | a       | a        |           |
| g                  | 1465094                 | a                    | 1403009                   | a                | 1407106               | s                             | g                                    | AS                                      | ++++                       | g      | g    | g   | g        | g       | g     | g      |      | g         | g  | g        | g      | g     | g      | g   | g       | g    | g        | g       | g         | g       | g        |           |
| -                  | 1467769                 | 1                    | 1405685                   | -                | 1409781               | ins                           | -                                    | APEC                                    | ++                         | -      | -    | 1   | 1        | -       | 1     | 1      |      | 1         | 1  | 1        | 1      | 1     | 1      | 1   | -       | 1    | -        | -       | -         | -       | 1        |           |
| a                  | 1468756                 | g                    | 1406672                   | g                | 1410768               | ns                            | g                                    | UTI89                                   | ++++                       | g      | g    | g   | g        | g       | g     | g      |      | g         | g  | g        | g      | g     | g      | g   | g       | g    | g        | g       | g         | g       | g        |           |
| c                  | 1472422                 | t                    | 1410338                   | t                | 1414434               | ns                            | c                                    | AS                                      | ++++                       | c      | c    | c   | c        | c       | c     |        |      |           |    |          | c      | c     | c      |     |         |      |          |         |           |         |          |           |
| a                  | 1473133                 | g                    | 1411049                   | g                | 1415145               | s                             | g                                    | UTI89                                   | ++++                       | g      | g    | g   | g        | g       | g     |        |      |           |    |          |        | g     | g      |     |         |      |          |         |           |         |          |           |
| a                  | 1474417                 | g                    | 1412333                   | a                | 1416429               | ns                            | a                                    | APEC                                    | ++++                       | a      | a    | a   | a        | a       | a     |        |      |           |    |          | a      | a     | a      | a   |         |      |          |         |           |         |          |           |
| g                  | 1477730                 | t                    | 1415646                   | t                | 1419742               | ns                            | g                                    | AS                                      | ++                         | g      | g    | g   | g        | g       | g     |        |      |           |    |          | a      | a     | a      | a   |         |      |          |         |           |         |          |           |
| g                  | 1484184                 | t                    | 1422100                   | t                | 1426196               | ns                            | g                                    | AS                                      | ++++                       | g      | g    | g   | g        | g       | g     |        | g    | g         | g  | g        | g      | g     | g      | g   | g       | g    | g        | g       | g         | g       | g        |           |
| g                  | 1485942                 | g                    | 1423858                   | a                | 1427954               | nc                            | g                                    | S88                                     | ++++                       | g      | g    | g   | g        | g       | g     |        | g    | g         | g  | g        | g      | g     | g      | g   | g       | g    | g        | g       | g         | g       | g        |           |
| g                  | 1487497                 | g                    | 1425413                   | a                | 1429509               | s                             | g                                    | S88                                     | ++++                       | g      | g    | g   | g        | g       | g     |        | g    | g         | g  | g        | g      | g     | g      | g   | g       | g    | g        | g       | g         | g       | g        |           |
| c                  | 1494997                 | t                    | 1432913                   | t                | 1437009               | ns                            | c                                    | AS                                      | ++++                       | c      | c    | c   | c        | c       | c     |        | c    | c         | c  |          | c      | c     | c      | c   | c       | c    | c        | c       | c         | c       | c        |           |
| g                  | 1496430                 | t                    | 1434346                   | t                | 1438442               | s                             | g                                    | AS                                      | ++                         | g      | g    | g   | g        | g       | g     |        | g    | g         | g  |          | g      | g     | g      | g   | g       | g    | a        | a       | a         | a       |          |           |
| t                  | 1500217                 | c                    | 1438133                   | c                | 1442229               | ns                            | c                                    | UTI89                                   | ++++                       | c      | c    | c   | c        | c       | c     |        | c    | c         | c  |          | c      | c     | c      | c   | c       | c    | c        | c       | c         | c       | c        |           |
| t                  | 1501794                 | c                    | 1439710                   | c                | 1443806               | ns                            | t                                    | AS                                      | ++++                       | t      | t    | t   | t        | t       | t     |        | t    | t         | t  |          | t      | t     | t      | t   | t       | t    | t        | t       | t         | t       | t        |           |
| g                  | 1504398                 | a                    | 1442314                   | a                | 1446410               | ns                            | a                                    | UTI89                                   | ++++                       | a      | a    | a   | a        | a       | a     |        | a    | a         | a  | a        | a      | a     | a      | a   | a       | a    | a        | a       | a         | a       | a        |           |
| t                  | 1508902                 | c                    | 1446818                   | c                | 1450914               | ns                            | c                                    | UTI89                                   | ++++                       | c      | c    | c   | c        | c       | c     |        | c    | c         | c  |          | c      | c     | c      | c   | c       | c    | c        | c       | c         | c       | c        |           |
| 1                  | 1519257                 | -                    | 1457172                   | 1                | 1461269               | del                           | 1                                    | APEC                                    | ++++                       | 1      | 1    | 1   | 1        |         |       |        |      |           |    | 1        |        |       |        |     |         |      | 1        | 1       | 1         |         |          |           |
| g                  | 1521868                 | a                    | 1459783                   | a                | 1463880               | ns                            | g                                    | AS                                      | +++                        |        | g    | g   | g        |         |       |        |      |           |    |          |        |       |        |     |         |      | g        | g       | g         |         |          |           |
| a                  | 1538087                 | g                    | 1528329                   | g                | 1480099               | nc                            | g                                    | UTI89                                   | ++++                       | g      | g    | g   | g        | g       | g     |        | g    | g         | g  | g        | g      | g     | g      | g   | g       | g    | g        | g       | g         | g       | g        |           |
| a                  | 1541057                 | g                    | 1531299                   | a                | 1483069               | ns                            | a                                    | APEC                                    | ++++                       | a      | a    | a   | a        | a       | a     |        | a    | a         | a  | a        | a      | a     | a      | a   | a       | a    | a        | a       | a         | a       | a        |           |
| g                  | 1544148                 | -                    | 1534072                   | t                | 1486160               | ns                            | t                                    | UTI89                                   | ++                         | t      | t    | t   |          |         |       |        |      |           |    |          |        |       |        |     |         |      |          |         |           |         |          |           |
| c                  | 1550029                 | c                    | 1538948                   | a                | 1492041               | s                             | a                                    | S88                                     | -                          | a      | c    | a   |          | c       | c     |        | t    | g         | g  | g        |        | g     | g      | g   |         |      |          |         |           |         |          |           |
| c                  | 1550527                 | a                    | 1539446                   | a                | 1492539               | ns                            | c                                    | AS                                      | ++++                       | c      | c    |     |          |         |       |        |      |           |    |          |        |       |        |     |         |      |          |         |           |         |          |           |

Table S7. Allocation of mutational SNPs to lineages by virtual outgroup analysis

| ExPEC Cluster      |                         |                      |                           |                  |                       | Outgroup Strains <sup>g</sup> |                                      |                                         |                            |        |      |     |          |         |       |        |      |           |    |          |        |       |        |     |         |      |          |         |           |         |          |           |   |
|--------------------|-------------------------|----------------------|---------------------------|------------------|-----------------------|-------------------------------|--------------------------------------|-----------------------------------------|----------------------------|--------|------|-----|----------|---------|-------|--------|------|-----------|----|----------|--------|-------|--------|-----|---------|------|----------|---------|-----------|---------|----------|-----------|---|
| UT189 <sup>a</sup> | UT189 site <sup>b</sup> | APEC 01 <sup>a</sup> | APEC 01 site <sup>b</sup> | S88 <sup>a</sup> | S88 site <sup>b</sup> | type <sup>c</sup>             | Inferred ancestral base <sup>d</sup> | Lineage inferred to mutate <sup>e</sup> | Support level <sup>f</sup> | CFT073 | ED1a | 536 | E2348/69 | SMS 3-5 | IAI39 | UMN026 | K-12 | ATCC 8739 | HS | D1 Sd197 | CB9615 | Sakai | EDL933 | IA1 | E24377A | SE11 | SS Ss046 | F2a 301 | F2a 2457T | F5 8401 | B4 Sd227 | B18 BS512 |   |
| c                  | 1647470                 | t                    | 1636388                   | -                | 1588975               | nc                            | c                                    | APEC                                    | ++++                       | c      |      |     | c        |         | c     | c      | c    | c         | c  |          |        |       |        |     |         |      |          |         |           |         |          |           |   |
| a                  | 1647836                 | g                    | 1638650                   | -                | 1588975               | ns                            | g                                    | UT189                                   | ++++                       | g      |      |     | g        |         |       |        |      |           |    |          |        |       |        |     |         |      |          |         |           |         |          |           |   |
| t                  | 1648653                 | c                    | 1639467                   | -                | 1588975               | ns                            | t                                    | APEC                                    | ++++                       | t      |      |     | t        | t       |       |        |      |           |    |          |        |       |        |     |         |      |          |         |           |         |          |           |   |
| t                  | 1648718                 | c                    | 1639532                   | -                | 1588975               | ns                            | c                                    | UT189                                   | ++++                       | c      |      |     | c        | c       |       |        |      |           |    |          |        |       |        |     |         |      |          |         |           |         |          |           |   |
| c                  | 1652927                 | g                    | 1643741                   | t                | 1590946               | nc                            | c                                    | APEC                                    | ++                         | c      |      | c   |          |         |       |        |      |           |    |          |        |       |        |     |         |      |          |         |           |         |          |           |   |
| c                  | 1664424                 | t                    | 1645651                   | c                | 1592856               | nc                            | c                                    | APEC                                    | ++                         | c      |      | c   | c        |         |       |        |      |           |    |          |        |       |        |     |         |      |          |         |           |         |          |           |   |
| c                  | 1664436                 | c                    | 1645663                   | a                | 1592868               | nc                            | c                                    | S88                                     | ++                         | c      |      | c   | c        |         |       |        |      |           |    |          |        |       |        |     |         |      |          |         |           |         |          |           |   |
| c                  | 1664699                 | a                    | 1645926                   | c                | 1593131               | ns                            | c                                    | APEC                                    | ++++                       | c      |      | c   | c        | c       | c     | c      | c    | c         | c  | c        | c      | c     | c      | c   | c       | c    |          | c       | c         | c       | c        |           |   |
| t                  | 1664807                 | a                    | 1646034                   | t                | 1593239               | ns                            | t                                    | APEC                                    | ++++                       | t      |      | t   | t        | t       | t     | t      | t    | t         | t  | t        | t      | t     | t      | t   | t       | t    |          | c       | c         | c       | c        |           |   |
| g                  | 1666384                 | g                    | 1647611                   | a                | 1594816               | nc                            | g                                    | S88                                     | ++++                       | g      | g    | g   | g        | g       | g     | g      | g    | g         | g  | g        | g      | g     | g      | g   | g       | g    | g        | g       | g         | g       | g        | g         |   |
| c                  | 1666390                 | t                    | 1647617                   | t                | 1594822               | nc                            | t                                    | UT189                                   | ++++                       | t      | t    | t   | t        | t       | t     | t      | t    | t         | t  | t        | t      | t     | t      | t   | t       | t    | t        | t       | t         | t       | t        | t         |   |
| c                  | 1680794                 | c                    | 1662021                   | t                | 1609226               | ns                            | c                                    | S88                                     | +++                        | c      |      |     |          |         |       |        |      |           |    |          |        |       |        |     |         |      |          |         |           |         |          |           |   |
| a                  | 1683458                 | c                    | 1664685                   | c                | 1611890               | ns                            | a                                    | AS                                      | ++++                       | a      | a    | a   | a        | a       | a     | a      | a    | a         | a  | a        | a      | a     | a      | a   | a       | a    |          | a       | a         | a       | a        |           |   |
| a                  | 1683785                 | g                    | 1665012                   | g                | 1612217               | ns                            | g                                    | UT189                                   | ++++                       | g      | g    | g   | g        | g       | g     | g      | g    | g         | g  | g        | g      | g     | g      | g   | g       | g    | g        | g       | g         | g       | g        | g         |   |
| c                  | 1684103                 | t                    | 1665330                   | t                | 1612535               | ns                            | c                                    | AS                                      | ++++                       | c      | c    | c   | c        | c       | c     | c      | c    | c         | c  | c        | c      | c     | c      | c   | c       | c    |          | c       | c         | c       | c        |           |   |
| t                  | 1692892                 | g                    | 1674119                   | t                | 1621324               | ns                            | t                                    | APEC                                    | ++++                       | t      | t    | t   | t        | t       | t     | t      | t    | t         | t  | t        | t      | t     | t      | t   | t       | t    | t        | t       | t         | t       | t        | t         |   |
| g                  | 1692976                 | a                    | 1674203                   | a                | 1621408               | nc                            | g                                    | AS                                      | ++++                       | g      | g    | g   | g        | g       | g     | g      | g    | g         | g  | g        | g      | g     | g      | g   | g       | g    | g        | g       | g         | g       | g        | g         |   |
| t                  | 1695714                 | g                    | 1676941                   | g                | 1624146               | nc                            | g                                    | UT189                                   | ++                         | g      | g    | g   | g        | g       | g     | g      | g    | a         | a  | a        | g      | g     | g      | g   | g       | g    | g        | g       | g         | g       | g        | g         |   |
| t                  | 1696400                 | c                    | 1677627                   | t                | 1624832               | s                             | t                                    | APEC                                    | ++++                       | t      | t    | t   | t        | t       | t     | t      | t    | t         | t  | t        | t      | t     | t      | t   | t       | t    | t        | t       | t         | t       | t        | t         |   |
| t                  | 1697022                 | c                    | 1678249                   | c                | 1625454               | s                             | c                                    | UT189                                   | ++                         | c      | c    | c   | c        | c       | c     | c      | c    | t         | t  | t        | c      | c     | c      | c   | c       | t    | t        | c       | c         | c       | c        | c         | c |
| c                  | 1704035                 | t                    | 1685262                   | t                | 1632467               | s                             | c                                    | AS                                      | +++                        | c      | c    | t   | c        | c       | c     | c      | c    | c         | c  | c        | c      | c     | c      | c   | c       | c    | c        | c       | c         | c       | c        | c         |   |
| -                  | 1705691                 | t                    | 1686928                   | t                | 1634133               | ins                           | -                                    | AS                                      | ++++                       | -      | -    | -   | -        | -       | -     | -      | -    | -         | -  | -        | -      | -     | -      | -   | -       | -    | -        | -       | -         | -       | -        | -         |   |
| c                  | 1708228                 | t                    | 1689456                   | c                | 1636661               | ns                            | c                                    | APEC                                    | ++++                       | c      | c    | c   | c        | c       | c     | c      | c    | c         | c  | c        | c      | c     | c      | c   | c       | c    | c        | c       | c         | c       | c        | c         |   |
| g                  | 1730334                 | g                    | 1711562                   | t                | 1658767               | ns                            | g                                    | S88                                     | ++++                       | g      | g    | g   | g        | g       | g     | g      | g    | g         | g  | g        | g      | g     | g      | g   | g       | g    | g        | g       | g         | g       | g        | g         |   |
| g                  | 1732984                 | t                    | 1714212                   | g                | 1661417               | ns                            | g                                    | APEC                                    | ++                         | a      | g    | g   | g        | a       | a     | g      | g    | g         | g  | g        | g      | g     | g      | g   | g       | g    | g        | g       | g         | g       | g        | g         |   |
| c                  | 1739534                 | a                    | 1720762                   | a                | 1667967               | ns                            | c                                    | AS                                      | ++++                       | c      | c    | c   | c        | c       | c     | c      | c    | c         | c  | c        | c      | c     | c      | c   | c       | c    | c        | c       | c         | c       | c        | c         |   |
| g                  | 1739912                 | a                    | 1721140                   | g                | 1668345               | ns                            | g                                    | APEC                                    | ++++                       | g      | g    | g   | g        | g       | g     | g      | g    | g         | g  | g        | g      | g     | g      | g   | g       | g    | g        | g       | g         | g       | g        | g         |   |
| g                  | 1741790                 | g                    | 1723018                   | a                | 1670223               | ns                            | g                                    | S88                                     | ++++                       | g      | g    | g   | g        | g       | g     | g      | g    | g         | g  | g        | g      | g     | g      | g   | g       | g    | g        | g       | g         | g       | g        | g         |   |
| g                  | 1746426                 | a                    | 1727654                   | a                | 1674859               | s                             | g                                    | AS                                      | ++++                       | g      | g    | g   | g        | g       | g     | g      | g    | g         | g  | g        | g      | g     | g      | g   | g       | g    | g        | g       | g         | g       | g        | g         |   |
| g                  | 1748153                 | a                    | 1729381                   | g                | 1676586               | ns                            | g                                    | APEC                                    | ++++                       | g      | g    | g   | g        | g       | g     | g      | g    | g         | g  | g        | g      | g     | g      | g   | g       | g    | g        | g       | g         | g       | g        | g         |   |
| g                  | 1751902                 | a                    | 1733130                   | a                | 1680335               | ns                            | a                                    | UT189                                   | ++++                       | a      | a    | a   | a        | a       | a     | a      | a    | a         | a  | a        | a      | a     | a      | a   | a       | a    | a        | a       | a         | a       | a        | a         |   |
| t                  | 1759335                 | t                    | 1740563                   | g                | 1687768               | ns                            | t                                    | S88                                     | ++++                       | t      | t    | t   | t        | t       | t     | t      | t    | t         | t  | t        | t      | t     | t      | t   | t       | t    | t        | t       | t         | t       | t        | t         |   |
| 1                  | 1761945                 | -                    | 1743172                   | 1                | 1690378               | del                           | 1                                    | APEC                                    | ++++                       | 1      | 1    | 1   | 1        | 1       | 1     | 1      | 1    | 1         | 1  | 1        | 1      | 1     | 1      | 1   | 1       | 1    | 1        | 1       | 1         | 1       | 1        | 1         |   |
| g                  | 1768156                 | a                    | 1749383                   | a                | 1696589               | s                             | a                                    | UT189                                   | ++                         | a      | a    | a   | a        | g       | g     | g      | g    | g         | g  | g        | g      | g     | g      | g   | g       | g    | g        | g       | g         | g       | g        | g         |   |
| g                  | 1775636                 | a                    | 1756863                   | g                | 1704069               | nc                            | g                                    | APEC                                    | ++++                       | g      | g    | g   | g        | g       | g     | g      | g    | g         | g  | g        | g      | g     | g      | g   | g       | g    | g        | g       | g         | g       | g        | g         |   |
| a                  | 1778602                 | g                    | 1759829                   | a                | 1707035               | s                             | a                                    | APEC                                    | ++++                       | a      | a    | a   | a        | a       | a     | a      | a    | a         | a  | a        | a      | a     | a      | a   | a       | a    | a        | a       | a         | a       | a        | a         |   |
| g                  | 1781707                 | a                    | 1762934                   | g                | 1710140               | ns                            | g                                    | APEC                                    | ++++                       | g      | g    | g   | g        | g       | g     | g      | g    | g         | g  | g        | g      | g     | g      | g   | g       | g    | g        | g       | g         | g       | g        | g         |   |
| g                  | 1783839                 | a                    | 1765066                   | g                | 1712272               | ns                            | g                                    | APEC                                    | ++++                       | g      | g    | g   | g        | g       | g     | g      | g    | g         | g  | g        | g      | g     | g      | g   | g       | g    | g        | g       | g         | g       | g        | g         |   |
| c                  | 1785512                 | t                    | 1766739                   | t                | 1713945               | ns                            | c                                    | AS                                      | ++++                       | c      | c    | c   | c        | c       | c     | c      | c    | c         | c  | c        | c      | c     | c      | c   | c       | c    | c        | c       | c         | c       | c        | c         |   |
| g                  | 1787340                 | g                    | 1768567                   | t                | 1715773               | ns                            | g                                    | S88                                     | ++++                       | g      | g    | g   | g        | g       | g     | g      | g    | g         | g  | g        | g      | g     | g      | g   | g       | g    | g        | g       | g         | g       | g        | g         |   |
| t                  | 1794103                 | c                    | 1775330                   | c                | 1722536               | ns                            | c                                    | UT189                                   | ++++                       | c      | c    | c   | c        | c       | c     | c      | c    | c         | c  | c        | c      | c     | c      | c   | c       | c    | c        | c       | c         | c       | c        | c         |   |
| a                  | 1798374                 | g                    | 1779601                   | g                | 1726807               | s                             | a                                    | AS                                      | ++++                       | a      | a    | a   | a        | a       | a     | a      | a    | a         | a  | a        | a      | a     | a      | a   | a       | a    | a        | a       | a         | a       | a        | a         |   |
| c                  | 1800257                 | a                    | 1781484                   | c                | 1728690               | nc                            | c                                    | APEC                                    | ++++                       | c      | c    | c   | c        | c       | c     | c      | c    | c         | c  | c        | c      | c     | c      | c   | c       | c    | c        | c       | c         | c       | c        | c         |   |
| c                  | 1800617                 | t                    | 1781844                   | c                | 1729050               | nc                            | c                                    | APEC                                    | ++++                       | c      | c    | c   | c        | c       | c     | c      | c    | c         | c  | c        | c      | c     | c      | c   | c       | c    | c        | c       | c         | c       | c        | c         |   |
| c                  | 1802868                 | t                    | 1784095                   | c                | 1731301               | s                             | c                                    | APEC                                    | ++++                       | c      | c    | c   | c        | c       | c     | c      | c    | c         | c  | c        | c      | c     | c      | c   | c       | c    | c        | c       | c         | c       | c        | c         |   |
| g                  | 1804968                 | g                    | 1786195                   | a                | 1733401               | ns                            | g                                    | S88                                     | ++++                       | g      | g    | g   | g        | g       | g     | g      | g    | g         | g  | g        | g      | g     | g      | g   | g       | g    | g        | g       | g         | g       | g        | g         |   |
| c                  | 1806368                 | t                    | 1787595                   | c                | 1734801               | ns                            | c                                    | APEC                                    | ++++                       | c      | c    | c   | c        | c       | c     | c      | c    | c         | c  | c        | c      | c     | c      | c   | c       | c    | c        | c       | c         | c       | c        | c         |   |
| c                  | 1809223                 | a                    | 1790450                   | c                | 1737656               | ns                            | c                                    | APEC                                    | ++++                       | c      | c    | c   | c        | c       | c     | c      | c    | c         | c  | c        | c      | c     | c      | c   | c       | c    | c        | c       | c         | c       | c        | c         |   |
| c                  | 1812687                 | a                    | 1793914                   | a                | 1741120               | ns                            | a                                    | UT189                                   | ++++                       | a      | a    | a   | a        | a       | a     | a      | a    | a         | a  | a        | a      | a     | a      | a   | a       | a    | a        | a       | a         | a       | a        | a         |   |
| t                  | 1819916                 | g                    | 1801143                   | g                | 1748349               | ns                            | g                                    | UT189                                   | ++                         | g      | g    | g   | g        | g       | g     | g      | a    | a         | a  | a        | a      | a     | a      | a   | a       | a    | a        | a       | a         | a       | a        | a         |   |
| g                  | 1823196                 | a                    | 1804423                   | g                | 1751629               | s                             | g                                    | APEC                                    | ++++                       | g      | g    | g   | g        | g       | g     | g      | g    | g         | g  | g        | g      | g     | g      | g   | g       | g    | g        | g       | g         | g       | g        | g         |   |
| t                  | 1827729                 | g                    | 1808956                   | g                | 1756162               | nc                            | t                                    | AS                                      | ++                         | t      | t    | t   | t        | t       | g     | t      | t    | t         | t  | t        | t      | t     | t      | t   | t       | t    | t        | t       | t         | t       | t        | t         |   |
| c                  | 1843632                 | t                    | 1824859                   | c                | 1772065               | ns                            | c                                    | APEC                                    | ++                         | c      | c    | c   | c        | c       | c     | c      | c    | c         | c  | c        | c      | c     | c      | c   | c       | c    | c        | c       | c         | c       | c        | c         |   |
| t                  | 1843776                 | c                    | 1825003                   | c                | 1772209               | ns                            | t                                    | AS                                      | ++++                       | t      | t    | t   | t        | t       | t     | t      | t    | t         | t  | t        | t      | t     | t      | t   | t       | t    | t        | t       | t         | t       | t        | t         |   |
| c                  | 1844646                 | a                    | 1825873                   | a                | 1773079               | ns                            | c                                    | AS                                      | ++++                       | c      | c    | c   | c        | c       | c     | c      | c    | c         | c  | c        | c      | c     | c      | c   | c       | c    | c        | c       | c         | c       | c        | c         |   |
| g                  | 1847036                 | g                    | 1828263                   | a                | 1775469               | ns                            | g                                    | S88                                     | ++                         | g      | g    | g   | g        | g       | g     | g      | a    | a         | a  | a        | a      | a     | a      | a   | a       | a    | a        | a       | a         | a       | a        | a         |   |
| c                  | 1847348                 | c                    | 1828575                   | t                | 1775781               | ns                            | c                                    | S88                                     | ++++                       | c      | c    | c   | c        | c       | c     | c      | c    | c         | c  | c        | c      | c     | c      | c   | c       | c    | c        | c       | c         | c       | c        | c         |   |
| a                  | 1854587                 | a                    | 1835814                   | g                | 1783020               | s                             | a                                    | S88                                     | ++++                       | a      | a    | a   | a        | a       | a     | a      | a    | a         | a  | a        | a      | a     | a      | a   | a       | a    | a        | a       | a         | a       | a        | a         |   |
| c                  | 1858337                 | t                    | 1839564                   | c                | 1786770               | s                             | c                                    | APEC                                    | ++++                       | c</    |      |     |          |         |       |        |      |           |    |          |        |       |        |     |         |      |          |         |           |         |          |           |   |

| ExPEC Cluster      |                         |                      |                           |                  |                       | Outgroup Strains <sup>g</sup> |                                      |                                         |                            |        |      |     |          |         |       |        |      |           |    |          |        |       |        |     |         |      |          |         |           |         |          |           |
|--------------------|-------------------------|----------------------|---------------------------|------------------|-----------------------|-------------------------------|--------------------------------------|-----------------------------------------|----------------------------|--------|------|-----|----------|---------|-------|--------|------|-----------|----|----------|--------|-------|--------|-----|---------|------|----------|---------|-----------|---------|----------|-----------|
| UT189 <sup>a</sup> | UT189 site <sup>b</sup> | APEC 01 <sup>a</sup> | APEC 01 site <sup>b</sup> | S88 <sup>a</sup> | S88 site <sup>b</sup> | type <sup>c</sup>             | Inferred ancestral base <sup>d</sup> | Lineage inferred to mutate <sup>e</sup> | Support level <sup>f</sup> | CFT073 | ED1a | 536 | E2348/69 | SMS 3-5 | IA139 | UMN026 | K-12 | ATCC 8729 | HS | D1 Sd197 | CB9615 | Sakai | ED1933 | IA1 | E24377A | SE11 | SS Ss046 | F2a 301 | F2a 2457T | F5 8401 | B4 Sd227 | B18 BS512 |
| a                  | 1968251                 | c                    | 1949476                   | a                | 1896684               | ns                            | a                                    | APEC                                    | ++++                       | a      | a    | a   | a        | a       | a     | a      | a    | a         | a  | a        | a      | a     | a      | a   | a       | a    | a        | a       | a         | a       | a        | a         |
| -                  | 1972956                 | 1                    | 1954182                   | -                | 1901389               | ins                           | -                                    | APEC                                    | ++                         | -      | -    | 1   | -        | -       | -     | -      | -    | -         | -  | -        | -      | -     | -      | -   | -       | -    | -        | -       | -         | -       | -        | -         |
| 1                  | 1983458                 | -                    | 1964683                   | 1                | 1911891               | del                           | 1                                    | APEC                                    | ++++                       | 1      | 1    | 1   | 1        | 1       | 1     | 1      | 1    | 1         | 1  | 1        | 1      | 1     | 1      | 1   | 1       | 1    | 1        | 1       | 1         | 1       | 1        | 1         |
| a                  | 1984824                 | g                    | 1966049                   | g                | 1913257               | nc                            | g                                    | UT189                                   | ++++                       | g      | g    | g   | g        | g       | g     | g      | g    | g         | g  | g        | g      | g     | g      | g   | g       | g    | g        | g       | g         | g       | g        | g         |
| a                  | 1985538                 | g                    | 1966763                   | a                | 1913971               | s                             | a                                    | APEC                                    | ++++                       | a      | a    | a   | a        | a       | a     | a      | a    | a         | a  | a        | a      | a     | a      | a   | a       | a    | a        | a       | a         | a       | a        | a         |
| c                  | 1989086                 | c                    | 1970311                   | t                | 1917519               | ns                            | c                                    | S88                                     | ++++                       | c      | c    | c   | c        | c       | c     | c      | c    | c         | c  | c        | c      | c     | c      | c   | c       | c    | c        | c       | c         | c       | c        | c         |
| t                  | 1992160                 | g                    | 1973385                   | g                | 1920593               | ns                            | g                                    | UT189                                   | ++++                       | g      | g    | g   | g        | g       | g     | g      | g    | g         | g  | g        | g      | g     | g      | g   | g       | g    | g        | g       | g         | g       | g        | g         |
| -                  | 2015743                 | 1                    | 1996978                   | 1                | 1944186               | del                           | 1                                    | UT189                                   | ++++                       | 1      | 1    | 1   | 1        | 1       | 1     | 1      | 1    | 1         | 1  | 1        | 1      | 1     | 1      | 1   | 1       | 1    | 1        | 1       | 1         | 1       | 1        | 1         |
| g                  | 2015758                 | t                    | 1996984                   | t                | 1944192               | nc                            | g                                    | AS                                      | ++++                       | g      | g    | g   | g        | g       | g     | g      | g    | g         | g  | g        | g      | g     | g      | g   | g       | g    | g        | g       | g         | g       | g        | g         |
| t                  | 2017127                 | t                    | 1998353                   | g                | 1948561               | ns                            | t                                    | S88                                     | ++++                       | t      | t    | t   | t        | t       | t     | t      | t    | t         | t  | t        | t      | t     | t      | t   | t       | t    | t        | t       | t         | t       | t        | t         |
| c                  | 2017589                 | t                    | 1998815                   | t                | 1946023               | ns                            | c                                    | AS                                      | ++++                       | c      | c    | c   | c        | c       | c     | c      | c    | c         | c  | c        | c      | c     | c      | c   | c       | c    | c        | c       | c         | c       | c        | c         |
| c                  | 2028889                 | c                    | 2010115                   | t                | 1957323               | s                             | c                                    | S88                                     | ++++                       | c      | c    | c   | c        | c       | c     | c      | c    | c         | c  | c        | c      | c     | c      | c   | c       | c    | c        | c       | c         | c       | c        | c         |
| c                  | 2034723                 | t                    | 2015949                   | c                | 1963157               | nc                            | c                                    | APEC                                    | ++                         | c      | c    | c   | c        | c       | c     | c      | c    | c         | c  | c        | c      | c     | c      | c   | c       | c    | c        | c       | c         | c       | c        | c         |
| c                  | 2034796                 | t                    | 2016022                   | c                | 1963230               | nc                            | c                                    | APEC                                    | ++++                       | c      | c    | c   | c        | c       | c     | c      | c    | c         | c  | c        | c      | c     | c      | c   | c       | c    | c        | c       | c         | c       | c        | c         |
| -                  | 2040303                 | 1                    | 2021530                   | -                | 1968737               | ins                           | -                                    | APEC                                    | ++++                       | -      | -    | -   | -        | -       | -     | -      | -    | -         | -  | -        | -      | -     | -      | -   | -       | -    | -        | -       | -         | -       | -        | -         |
| g                  | 2041278                 | g                    | 2022505                   | a                | 1969712               | ns                            | g                                    | S88                                     | ++++                       | g      | g    | g   | g        | g       | g     | g      | g    | g         | g  | g        | g      | g     | g      | g   | g       | g    | g        | g       | g         | g       | g        | g         |
| c                  | 2042435                 | t                    | 2023662                   | c                | 1970869               | s                             | c                                    | APEC                                    | ++++                       | c      | c    | c   | c        | c       | c     | c      | c    | c         | c  | c        | c      | c     | c      | c   | c       | c    | c        | c       | c         | c       | c        | c         |
| g                  | 2042640                 | a                    | 2023867                   | g                | 1971074               | ns                            | g                                    | APEC                                    | ++++                       | g      | g    | g   | g        | g       | g     | g      | g    | g         | g  | g        | g      | g     | g      | g   | g       | g    | g        | g       | g         | g       | g        | g         |
| a                  | 2049617                 | g                    | 2030844                   | g                | 1978051               | s                             | g                                    | UT189                                   | ++++                       | a      | g    | g   | g        | g       | g     | g      | g    | g         | g  | g        | g      | g     | g      | g   | g       | g    | g        | g       | g         | g       | g        | g         |
| 5                  | 2049890                 | 5                    | 2031127                   | -                | 1978333               | del                           | 5                                    | S88                                     | ++                         | 5      | 5    | 5   | 5        | 5       | 5     | 5      | 5    | 5         | 5  | 5        | 5      | 5     | 5      | 5   | 5       | 5    | 5        | 5       | 5         | 5       | 5        | 5         |
| g                  | 2050425                 | t                    | 2031652                   | t                | 1978854               | ns                            | t                                    | UT189                                   | ++++                       | t      | t    | t   | t        | t       | t     | t      | t    | t         | t  | t        | t      | t     | t      | t   | t       | t    | t        | t       | t         | t       | t        | t         |
| g                  | 2054234                 | a                    | 2035461                   | g                | 1982663               | nc                            | g                                    | APEC                                    | ++                         | g      | g    | g   | g        | g       | g     | g      | g    | a         | a  | a        | g      | g     | g      | a   | g       | g    | g        | g       | g         | g       | g        | g         |
| c                  | 2055661                 | c                    | 2036888                   | t                | 1984090               | ns                            | c                                    | S88                                     | ++++                       | c      | c    | c   | c        | c       | c     | c      | c    | c         | c  | c        | c      | c     | c      | c   | c       | c    | c        | c       | c         | c       | c        | c         |
| g                  | 2058158                 | c                    | 2039385                   | c                | 1986587               | s                             | c                                    | UT189                                   | ++++                       | c      | c    | c   | c        | c       | c     | c      | c    | c         | c  | c        | c      | c     | c      | c   | c       | c    | c        | c       | c         | c       | c        | c         |
| a                  | 2060140                 | a                    | 2041367                   | c                | 1988569               | ns                            | a                                    | S88                                     | ++++                       | a      | a    | a   | a        | a       | a     | a      | a    | a         | a  | a        | a      | a     | a      | a   | a       | a    | a        | a       | a         | a       | a        | a         |
| g                  | 2060419                 | g                    | 2041646                   | a                | 1988848               | ns                            | a                                    | S88                                     | -                          | a      | g    | a   | a        | a       | a     | a      | a    | g         | g  | g        | g      | g     | g      | g   | g       | g    | g        | g       | g         | g       | g        | g         |
| 1                  | 2061420                 | -                    | 2042646                   | 1                | 1989849               | del                           | -                                    | APEC                                    | -                          | -      | -    | -   | -        | -       | -     | -      | -    | -         | -  | -        | -      | -     | -      | -   | -       | -    | -        | -       | -         | -       | -        | -         |
| 1                  | 2061411                 | -                    | 2042646                   | -                | 1989849               | ins                           | -                                    | UT189                                   | ++++                       | -      | -    | -   | -        | -       | -     | -      | -    | -         | -  | -        | -      | -     | -      | -   | -       | -    | -        | -       | -         | -       | -        | -         |
| g                  | 2069960                 | t                    | 2090717                   | g                | 1998388               | nc                            | g                                    | APEC                                    | ++++                       | g      | g    | g   | g        | g       | g     | g      | g    | g         | g  | g        | g      | g     | g      | g   | g       | g    | g        | g       | g         | g       | g        | g         |
| g                  | 2074868                 | t                    | 2095625                   | t                | 2003296               | ns                            | g                                    | AS                                      | +++                        | g      | g    | g   | g        | g       | g     | g      | g    | g         | g  | g        | g      | g     | g      | g   | g       | g    | g        | g       | g         | g       | g        | g         |
| a                  | 2080256                 | g                    | 2101013                   | g                | 2008684               | s                             | g                                    | UT189                                   | +++                        | g      | g    | g   | g        | g       | g     | g      | g    | g         | g  | g        | g      | g     | g      | g   | g       | g    | g        | g       | g         | g       | g        | g         |
| c                  | 2085418                 | g                    | 2106175                   | c                | 2013846               | ns                            | c                                    | APEC                                    | +++                        | c      | c    | c   | c        | c       | c     | c      | c    | c         | c  | c        | c      | c     | c      | c   | c       | c    | c        | c       | c         | c       | c        | c         |
| 2                  | 2094224                 | -                    | 2114980                   | 2                | 2022652               | del                           | 2                                    | APEC                                    | +++                        | 2      | 2    | 2   | 2        | 2       | 2     | 2      | 2    | 2         | 2  | 2        | 2      | 2     | 2      | 2   | 2       | 2    | 2        | 2       | 2         | 2       | 2        | 2         |
| g                  | 2109392                 | a                    | 2130146                   | a                | 2037819               | s                             | g                                    | AS                                      | ++++                       | g      | g    | g   | g        | g       | g     | g      | g    | g         | g  | g        | g      | g     | g      | g   | g       | g    | g        | g       | g         | g       | g        | g         |
| a                  | 2109607                 | g                    | 2130361                   | g                | 2038034               | nc                            | a                                    | AS                                      | ++                         | a      | g    | a   | g        | g       | g     | g      | g    | g         | g  | g        | g      | g     | g      | g   | g       | g    | g        | g       | g         | g       | g        | g         |
| t                  | 2109879                 | c                    | 2130633                   | c                | 2038306               | s                             | t                                    | AS                                      | ++                         | t      | c    | t   | c        | c       | c     | c      | c    | c         | c  | c        | c      | c     | c      | c   | c       | c    | c        | c       | c         | c       | c        | c         |
| -                  | 2110732                 | 3                    | 2131496                   | 3                | 2039169               | del                           | 3                                    | UT189                                   | ++++                       | 3      | 3    | 3   | 3        | 3       | 3     | 3      | 3    | 3         | 3  | 3        | 3      | 3     | 3      | 3   | 3       | 3    | 3        | 3       | 3         | 3       | 3        | 3         |
| g                  | 2279775                 | a                    | 2229281                   | a                | 2139199               | s                             | g                                    | AS                                      | ++++                       | g      | g    | g   | g        | g       | g     | g      | g    | g         | g  | g        | g      | g     | g      | g   | g       | g    | g        | g       | g         | g       | g        | g         |
| g                  | 2281766                 | a                    | 2231272                   | a                | 2141190               | s                             | g                                    | AS                                      | ++++                       | g      | g    | g   | g        | g       | g     | g      | g    | g         | g  | g        | g      | g     | g      | g   | g       | g    | g        | g       | g         | g       | g        | g         |
| g                  | 2282840                 | a                    | 2232346                   | a                | 2142264               | s                             | g                                    | AS                                      | ++                         | g      | g    | g   | g        | g       | g     | g      | g    | g         | g  | g        | a      | g     | a      | a   | g       | g    | g        | g       | g         | g       | g        | g         |
| g                  | 2283782                 | a                    | 2233288                   | a                | 2143206               | s                             | g                                    | AS                                      | ++                         | g      | g    | g   | a        | a       | a     | a      | a    | g         | g  | g        | a      | a     | a      | a   | g       | g    | g        | a       | g         | g       | g        | a         |
| g                  | 2284861                 | a                    | 2234367                   | a                | 2144285               | s                             | g                                    | AS                                      | ++++                       | g      | g    | g   | a        | g       | g     | g      | g    | g         | g  | g        | g      | g     | g      | g   | g       | g    | g        | g       | g         | g       | g        | g         |
| g                  | 2284877                 | a                    | 2234383                   | a                | 2144301               | s                             | g                                    | AS                                      | ++++                       | g      | g    | g   | g        | g       | g     | g      | g    | g         | g  | g        | g      | g     | g      | g   | g       | g    | g        | g       | g         | g       | g        | g         |
| g                  | 2285554                 | a                    | 2235060                   | a                | 2144978               | ns                            | g                                    | AS                                      | ++++                       | g      | g    | g   | g        | g       | g     | g      | g    | g         | g  | g        | g      | g     | g      | g   | g       | g    | g        | g       | g         | g       | g        | g         |
| g                  | 2287961                 | a                    | 2237467                   | a                | 2147385               | ns                            | g                                    | AS                                      | ++++                       | g      | g    | g   | g        | g       | g     | g      | g    | g         | g  | g        | g      | g     | g      | g   | g       | g    | g        | g       | g         | g       | g        | g         |
| c                  | 2291758                 | t                    | 2241264                   | t                | 2151182               | s                             | c                                    | AS                                      | ++++                       | c      | c    | c   | c        | c       | c     | c      | c    | c         | c  | c        | c      | c     | c      | c   | c       | c    | c        | c       | c         | c       | c        | c         |
| a                  | 2292182                 | t                    | 2241688                   | t                | 2151606               | ns                            | t                                    | UT189                                   | ++++                       | t      | t    | t   | t        | t       | t     | t      | t    | t         | t  | t        | t      | t     | t      | t   | t       | t    | t        | t       | t         | t       | t        | t         |
| c                  | 2293329                 | c                    | 2242835                   | a                | 2152753               | s                             | c                                    | S88                                     | ++                         | t      | c    | t   | c        | c       | c     | c      | c    | c         | c  | c        | c      | c     | c      | c   | c       | c    | c        | c       | c         | c       | c        | c         |
| g                  | 2298541                 | t                    | 2248047                   | t                | 2157965               | ns                            | g                                    | AS                                      | ++++                       | g      | g    | g   | g        | g       | g     | g      | g    | g         | g  | g        | g      | g     | g      | g   | g       | g    | g        | g       | g         | g       | g        | g         |
| c                  | 2299628                 | a                    | 2249134                   | c                | 2159052               | ns                            | c                                    | APEC                                    | ++++                       | c      | c    | c   | c        | c       | c     | c      | c    | c         | c  | c        | c      | c     | c      | c   | c       | c    | c        | c       | c         | c       | c        | c         |
| t                  | 2300902                 | g                    | 2250408                   | g                | 2160326               | ns                            | g                                    | UT189                                   | ++++                       | g      | g    | g   | g        | g       | g     | g      | g    | g         | g  | g        | g      | g     | g      | g   | g       | g    | g        | g       | g         | g       | g        | g         |
| 1                  | 2304194                 | -                    | 2253699                   | 1                | 2163618               | del                           | 1                                    | APEC                                    | ++                         | 1      | 1    | 1   | 1        | 1       | 1     | 1      | 1    | 1         | 1  | 1        | 1      | 1     | 1      | 1   | 1       | 1    | 1        | 1       | 1         | 1       | 1        | 1         |
| c                  | 2308823                 | t                    | 2258328                   | t                | 2168247               | s                             | c                                    | AS                                      | ++++                       | c      | c    | c   | c        | c       | c     | c      | c    | c         | c  | c        | c      | c     | c      | c   | c       | c    | c        | c       | c         | c       | c        | c         |
| t                  | 2313552                 | g                    | 2286328                   | g                | 2209375               | ns                            | g                                    | UT189                                   | ++++                       | g      | g    | g   | g        | g       | g     | g      | g    | g         | g  | g        | g      | g     | g      | g   | g       | g    | g        | g       | g         | g       | g        | g         |
| c                  | 2314974                 | c                    | 2287750                   | t                | 2210797               | ns                            | c                                    | S88                                     | ++++                       | c      | c    | c   | c        | c       | c     | c      | c    | c         | c  | c        | c      | c     | c      | c   | c       | c    | c        | c       | c         | c       | c        | c         |
| c                  | 2315277                 | c                    | 2288053                   | t                | 2211100               | ns                            | c                                    | S88                                     | ++++                       | c      | c    | c   | c        | c       | c     | c      | c    | c         | c  | c        | c      | c     | c      | c   | c       | c    | c        | c       | c         | c       | c        | c         |
| g                  | 2318549                 | t                    | 229                       |                  |                       |                               |                                      |                                         |                            |        |      |     |          |         |       |        |      |           |    |          |        |       |        |     |         |      |          |         |           |         |          |           |

Table S7. Allocation of mutational SNPs to lineages by virtual outgroup analysis

| ExPEC Cluster      |                         |                      |                           |                  |                       |                   |                                      |                                         |                            | Outgroup Strains <sup>g</sup> |      |     |          |         |       |        |      |           |    |          |        |       |        |      |         |      |           |         |           |         |          |           |
|--------------------|-------------------------|----------------------|---------------------------|------------------|-----------------------|-------------------|--------------------------------------|-----------------------------------------|----------------------------|-------------------------------|------|-----|----------|---------|-------|--------|------|-----------|----|----------|--------|-------|--------|------|---------|------|-----------|---------|-----------|---------|----------|-----------|
| UT189 <sup>a</sup> | UT189 site <sup>b</sup> | APEC 01 <sup>a</sup> | APEC 01 site <sup>b</sup> | S88 <sup>a</sup> | S88 site <sup>b</sup> | type <sup>c</sup> | Inferred ancestral base <sup>d</sup> | Lineage inferred to mutate <sup>e</sup> | Support level <sup>f</sup> | CFT073                        | ED1a | 536 | E2348/69 | SMS 3-5 | IAI39 | UMN026 | K-12 | ATCC 8739 | HS | D1 Sd197 | CB9615 | Sakai | EDL933 | IAI1 | E24377A | SE11 | SS Sso046 | F2a 301 | F2a 2457T | F5 8401 | B4 Sb227 | B18 BS512 |
| a                  | 2430345                 | g                    | 2403035                   | g                | 2326168               | s                 | g                                    | UT189                                   | ++++                       | g                             | g    | g   | g        | g       | g     | g      | g    | g         | g  | g        | g      | g     | g      | g    | g       | g    | g         | g       | g         | g       | g        | g         |
| a                  | 2440930                 | c                    | 2413620                   | c                | 2336753               | ns                | c                                    | UT189                                   | ++++                       | c                             | c    | c   | c        | c       | c     | c      | c    | c         | c  | c        | c      | c     | c      | c    | c       | c    | c         | c       | c         | c       | c        | c         |
| g                  | 2444432                 | g                    | 2417122                   | a                | 2340255               | s                 | g                                    | S88                                     | ++++                       | g                             | g    | g   | g        | g       | g     | g      | g    | g         | g  | g        | g      | g     | g      | g    | g       | g    | g         | g       | g         | g       | g        | g         |
| t                  | 2474739                 | c                    | 2420529                   | c                | 2343662               | ns                | c                                    | UT189                                   | ++++                       | c                             | c    | c   | c        | c       | c     | c      | c    | c         | c  | c        | c      | c     | c      | c    | c       | c    | c         | c       | c         | c       | c        | c         |
| t                  | 2449542                 | c                    | 2422232                   | c                | 2345365               | nc                | c                                    | UT189                                   | ++++                       | c                             | c    | c   | c        | c       | c     | c      | c    | c         | c  | c        | c      | c     | c      | c    | c       | c    | c         | c       | c         | c       | c        | c         |
| t                  | 2455337                 | a                    | 2428027                   | t                | 2351160               | ns                | t                                    | APEC                                    | ++++                       | t                             | t    | t   | t        | t       | t     | t      | t    | t         | t  | t        | t      | t     | t      | t    | t       | t    | t         | t       | t         | t       | t        | t         |
| c                  | 2458675                 | t                    | 2431365                   | c                | 2354498               | s                 | c                                    | APEC                                    | ++++                       | c                             | c    | c   | c        | c       | c     | c      | c    | c         | c  | c        |        |       |        |      |         |      |           |         |           |         |          |           |
| a                  | 2459593                 | a                    | 2432283                   | g                | 2355416               | nc                | a                                    | S88                                     | ++++                       | a                             | a    | a   | a        | a       | a     | a      | a    | a         | a  | a        | a      | a     | a      | a    | a       | a    | a         | a       | a         | a       | a        | a         |
| c                  | 2462718                 | t                    | 2435408                   | c                | 2358541               | ns                | c                                    | APEC                                    | ++++                       | c                             | c    | c   | c        | c       | c     | c      | c    | c         | c  | c        |        |       |        |      |         |      |           |         |           |         |          |           |
| g                  | 2464283                 | a                    | 2436973                   | a                | 2360106               | ns                | a                                    | UT189                                   | ++++                       | a                             | a    | a   | a        | a       | a     | a      | a    | a         | a  | a        | a      | a     | a      | a    | a       | a    | a         | a       | a         | a       | a        | a         |
| a                  | 2465047                 | t                    | 2437737                   | t                | 2360870               | ns                | t                                    | UT189                                   | ++++                       | t                             | t    | t   | t        | t       | t     | t      | t    | t         | t  | t        | t      | t     | t      | t    | t       | t    | t         | t       | t         | t       | t        | t         |
| t                  | 2472015                 | c                    | 2444705                   | c                | 2378738               | s                 | c                                    | UT189                                   | ++++                       | c                             | c    | c   | c        | c       | c     | c      | c    | c         | c  | c        | c      | c     | c      | c    | c       | c    | c         | c       | c         | c       | c        | c         |
| c                  | 2478525                 | t                    | 2451215                   | c                | 2374348               | ns                | c                                    | APEC                                    | ++++                       | c                             | c    | c   | c        | c       | c     | c      | c    | c         | c  | c        | c      | c     | c      | c    | c       | c    | c         | c       | c         | c       | c        | c         |
| g                  | 2479957                 | g                    | 2452647                   | a                | 2375780               | s                 | g                                    | S88                                     | ++                         | g                             | g    | g   | g        | g       | g     | g      | a    | a         | a  | g        | g      | g     | g      | a    | a       | a    | a         | a       | a         | a       | a        | a         |
| t                  | 2486813                 | c                    | 2459503                   | c                | 2382636               | ns                | c                                    | UT189                                   | ++++                       | c                             | c    | c   | c        | c       | c     | c      | c    | c         | c  | c        | c      | c     | c      | c    | c       | c    | c         | c       | c         | c       | c        | c         |
| c                  | 2495295                 | c                    | 2467985                   | t                | 2391118               | ns                | c                                    | S88                                     | ++++                       | c                             | c    | c   | c        | c       | c     | c      | c    | c         | c  | c        | c      | c     | c      | c    | c       | c    | c         | c       | c         | c       | c        | c         |
| g                  | 2499387                 | c                    | 2472077                   | g                | 2395210               | s                 | g                                    | APEC                                    | ++++                       | g                             | g    | g   | g        | g       | g     | g      | g    | g         | g  |          | g      | g     | g      | g    | g       | g    | g         | g       | g         | g       | g        | g         |
| g                  | 2499412                 | g                    | 2472102                   | a                | 2395235               | ns                | g                                    | S88                                     | ++++                       | g                             | g    | g   | g        | g       | g     | g      | g    | g         | g  |          | g      | g     | g      | g    | g       | g    | g         | g       | g         | g       | g        | g         |
| g                  | 2501780                 | g                    | 2474470                   | a                | 2397603               | nc                | g                                    | S88                                     | ++++                       | g                             | g    | g   | g        | g       |       |        |      |           |    |          |        |       |        |      |         |      |           |         |           |         |          |           |

Table S7. Allocation of mutational SNPs to lineages by virtual outgroup analysis

[illegible]

Table S7. Allocation of mutational SNPs to lineages by virtual outgroup analysis

| ExPEC Cluster      |                         |                      |                           |                  |                       | Outgroup Strains <sup>g</sup> |                                      |                                         |                            |        |      |     |          |         |       |        |      |           |    |          |        |       |        |      |         |      |          |         |           |         |          |           |
|--------------------|-------------------------|----------------------|---------------------------|------------------|-----------------------|-------------------------------|--------------------------------------|-----------------------------------------|----------------------------|--------|------|-----|----------|---------|-------|--------|------|-----------|----|----------|--------|-------|--------|------|---------|------|----------|---------|-----------|---------|----------|-----------|
| UT189 <sup>a</sup> | UT189 site <sup>b</sup> | APEC 01 <sup>a</sup> | APEC 01 site <sup>b</sup> | S88 <sup>a</sup> | S88 site <sup>b</sup> | type <sup>c</sup>             | Inferred ancestral base <sup>d</sup> | Lineage inferred to mutate <sup>e</sup> | Support level <sup>f</sup> | CFT073 | ED1a | 536 | E2348/69 | SMS 3-5 | IAI39 | UMN026 | K-12 | ATCC 8739 | HS | D1 Sd197 | CB9615 | Sakai | EDL933 | IAI1 | E24377A | SE11 | SS Ss046 | F2a 301 | F2a 2457T | F5 8401 | B4 Sd227 | B18 BS512 |
| a                  | 3079264                 | g                    | 3093771                   | g                | 3011141               | s                             | g                                    | UT189                                   | ++++                       | g      | g    | g   | g        | g       | g     | g      | g    | g         | g  | g        | g      | g     | g      | g    | g       | g    | g        | g       | g         | g       | g        |           |
| g                  | 3079927                 | t                    | 3094434                   | t                | 3011804               | ns                            | t                                    | UT189                                   | ++++                       | t      | t    | t   | t        | t       | t     | t      | t    | t         | t  | t        | t      | t     | t      | t    | t       | t    | t        | t       | t         | t       | t        |           |
| t                  | 3080045                 | t                    | 3094552                   | g                | 3011922               | ns                            | t                                    | S88                                     | ++++                       | t      | t    | t   | t        | t       | t     | t      | t    | t         | t  | t        | t      | t     | t      | t    | t       | t    | t        | t       | t         | t       | t        |           |
| t                  | 3081153                 | c                    | 3095660                   | c                | 3013030               | s                             | c                                    | UT189                                   | ++++                       | c      | c    | c   | c        | c       | c     | c      | c    | c         | c  | c        | c      | c     | c      | c    | c       | c    | c        | c       | c         | c       | c        |           |
| g                  | 3082908                 | a                    | 3097415                   | a                | 3014785               | ns                            | a                                    | UT189                                   | ++++                       | a      | a    | a   | a        | a       | a     | a      | a    | a         | a  | a        | a      | a     | a      | a    | a       | a    | a        | a       | a         | a       | a        |           |
| a                  | 3094027                 | t                    | 3108534                   | a                | 3025904               | ns                            | a                                    | APEC                                    | ++++                       | a      | a    | a   | a        | a       | a     | a      | a    | a         | a  | a        | a      | a     | a      | a    | a       | a    | a        | a       | a         | a       | a        |           |
| t                  | 3098812                 | a                    | 3113319                   | a                | 3030689               | ns                            | a                                    | UT189                                   | ++++                       | a      | a    | a   | a        | a       | a     | a      | a    | a         | a  | a        | a      | a     | a      | a    | a       | a    | a        | a       | a         | a       | a        |           |
| t                  | 3104311                 | c                    | 3118818                   | t                | 3036188               | ns                            | t                                    | APEC                                    | ++                         | t      | t    |     |          |         |       |        |      |           |    |          |        |       |        |      |         |      |          |         |           |         |          |           |
| c                  | 3105017                 | g                    | 3119524                   | g                | 3036894               | ns                            | g                                    | UT189                                   | ++                         | g      | g    |     |          |         |       |        |      |           |    |          |        |       |        |      |         |      |          |         |           |         |          |           |
| 10                 | 3115492                 | -                    | 3129998                   | -                | 3047368               | indel                         | ?                                    | UT189/AS                                | +/-                        |        |      |     |          |         |       |        |      |           |    |          |        |       |        |      |         |      |          |         |           |         |          |           |
| t                  | 3119787                 | t                    | 3134284                   | a                | 3051654               | s                             | t                                    | S88                                     | ++                         | t      | t    |     |          |         |       |        |      |           |    |          |        |       |        |      |         |      |          |         |           |         |          |           |
| a                  | 3121450                 | g                    | 3135947                   | g                | 3053317               | ns                            | g                                    | UT189                                   | ++                         | g      | g    |     |          |         |       |        |      |           |    |          |        |       |        |      |         |      |          |         |           |         |          |           |
| c                  | 3123594                 | c                    | 3140677                   | t                | 3055461               | ns                            | c                                    | S88                                     | ++                         | c      | c    |     |          |         |       |        |      |           |    |          |        |       |        |      |         |      |          |         |           |         |          |           |
| a                  | 3129390                 | g                    | 3146473                   | a                | 3061257               | nc                            | a                                    | APEC                                    | ++                         | a      | a    |     |          |         |       |        |      |           |    |          |        |       |        |      |         |      |          |         |           |         |          |           |
| a                  | 3133250                 | c                    | 3150333                   | c                | 3065117               | ns                            | c                                    | UT189                                   | +++                        | c      | c    | c   | c        | c       |       |        |      |           |    |          |        |       |        |      |         |      |          |         |           |         |          |           |
| c                  | 3133803                 | t                    | 3150886                   | t                | 3065670               | s                             | t                                    | UT189                                   | +++                        | t      | t    | t   | t        | t       | c     |        |      |           |    |          |        |       |        |      |         |      |          |         |           |         |          |           |
| -                  | 3137695                 | 3                    | 3154779                   | -                | 3069562               | ins                           | 3                                    | APEC                                    | -                          | 3      | 3    | 3   | 3        | 3       |       |        |      |           |    |          |        |       |        |      |         |      |          |         |           |         |          |           |
| -                  | 3137689                 | -                    | 3154781                   | 3                | 3069563               | ins                           | 3                                    | S88                                     | -                          | 3      | 3    | 3   | 3        | 3       |       |        |      |           |    |          |        |       |        |      |         |      |          |         |           |         |          |           |
| -                  | 3137690                 | g                    | 3154782                   | g                | 3069566               | del                           | g                                    | UT189                                   | +++                        | g      | g    | g   | g        | g       |       |        |      |           |    |          |        |       |        |      |         |      |          |         |           |         |          |           |
| t                  | 3139660                 | c                    | 3156755                   | c                | 3071539               | ns                            | c                                    | UT189                                   | +++                        | c      | c    | c   | c        | c       | c     |        |      |           |    |          |        |       |        |      |         |      |          |         |           |         |          |           |
| g                  | 3145220                 | a                    | 3162315                   | g                | 3077099               | ns                            | g                                    | APEC                                    | +++                        | g      | g    | g   | g        | g       | g     | g      | g    | g         | g  | g        | g      | g     | g      | g    | g       | g    | g        | g       | g         | g       | g        | g         |
| t                  | 3149493                 | a                    | 3166588                   | a                | 3081372               | nc                            | t                                    | AS                                      | ++                         | t      | t    | t   | t        | c       | c     | c      | c    | c         | c  | c        | c      | c     | c      | c    | c       | c    | c        | c       | c         | c       | c        | c         |
| g                  | 3155620                 | a                    | 3172715                   | g                | 3087499               | s                             | g                                    | APEC                                    | ++++                       | g      | g    | g   | g        | g       | g     | g      | g    | g         | g  | g        | g      | g     | g      | g    | g       | g    | g        | g       | g         | g       | g        | g         |
| a                  | 3166862                 | g                    | 3183957                   | g                | 3098741               | nc                            | g                                    | UT189                                   | ++                         | g      | g    | g   | g        | g       | g     | g      | g    | g         | g  | g        | g      | g     | g      | g    | g       | g    | g        | g       | g         | g       | g        | g         |
| g                  | 3173049                 | a                    | 3190144                   | a                | 3104928               | s                             | g                                    | AS                                      | ++                         | g      | g    | g   | g        | g       | g     | g      | a    | a         | a  |          |        |       |        |      |         |      |          |         |           |         |          |           |
| c                  | 3173298                 | t                    | 3190393                   | c                | 3105177               | s                             | c                                    | APEC                                    | ++++                       | c      | c    | c   | c        | c       | c     | c      | c    | c         | c  | c        | c      | c     | c      | c    | c       | c    | c        | c       | c         | c       | c        | c         |
| a                  | 3174760                 | a                    | 3191855                   | t                | 3106639               | nc                            | a                                    | S88                                     | ++++                       | a      | a    | a   | a        | a       | a     | a      | a    | a         | a  | a        | a      | a     | a      | a    | a       | a    | a        | a       | a         | a       | a        | a         |
| g                  | 3188210                 | t                    | 3205305                   | g                | 3120089               | ns                            | g                                    | APEC                                    | ++++                       | g      | g    | g   | g        | g       | g     | g      | g    | g         | g  | g        | g      | g     | g      | g    | g       | g    | g        | g       | g         | g       | g        | g         |
| a                  | 3188698                 | c                    | 3205793                   | c                | 3120577               | s                             | c                                    | UT189                                   | ++++                       | c      | c    | c   | c        | c       | c     | c      | c    | c         | c  | c        | c      | c     | c      | c    | c       | c    | c        | c       | c         | c       | c        | c         |
| c                  | 3194119                 | a                    | 3211214                   | c                | 3125998               | ns                            | c                                    | APEC                                    | ++++                       | c      | c    | c   | c        | c       | c     | c      | c    | c         | c  | c        | c      | c     | c      | c    | c       | c    | c        | c       | c         | c       | c        | c         |
| g                  | 3197069                 | a                    | 3214164                   | a                | 3128948               | s                             | g                                    | AS                                      | ++++                       | g      | g    | g   | g        | g       | g     | g      | g    | g         | g  | g        | g      | g     | g      | g    | g       | g    | g        | g       | g         | g       | g        | g         |
| g                  | 3199881                 | a                    | 3216976                   | g                | 3131760               | s                             | g                                    | APEC                                    | ++++                       | g      | g    | g   | g        | g       | g     | g      | g    | g         | g  | g        | g      | g     | g      | g    | g       | g    | g        | g       | g         | g       | g        | g         |
| g                  | 3209368                 | a                    | 3226463                   | a                | 3141247               | s                             | g                                    | AS                                      | ++++                       | g      | a    | g   | g        | g       | g     | g      | g    | g         | g  | g        | g      | g     | g      | g    | g       | g    | g        | g       | g         | g       | g        | g         |
| a                  | 3210038                 | g                    | 3227133                   | g                | 3141917               | ns                            | g                                    | UT189                                   | ++++                       | g      | g    | g   | g        | g       | g     | g      | g    | g         | g  | g        | g      | g     | g      | g    | g       | g    | g        | g       | g         | g       | g        | g         |
| c                  | 3225664                 | t                    | 3242759                   | c                | 3157543               | ns                            | c                                    | APEC                                    | ++++                       | c      | c    | c   | c        | c       | c     | c      | c    | c         | c  | c        | c      | c     | c      | c    | c       | c    | c        | c       | c         | c       | c        | c         |
| a                  | 3229145                 | c                    | 3246240                   | c                | 3161024               | ns                            | c                                    | UT189                                   | ++++                       | c      | c    | c   | c        | c       | c     | c      | c    | c         | c  | c        | c      | c     | c      | c    | c       | c    | c        | c       | c         | c       | c        | c         |
| a                  | 3230093                 | c                    | 3247188                   | c                | 3161972               | s                             | a                                    | AS                                      | ++++                       | a      | a    | a   | a        | a       | a     | a      | a    | a         | a  | a        | a      | a     | a      | a    | a       | a    | a        | a       | a         | a       | a        | a         |
| t                  | 3242026                 | c                    | 3259121                   | c                | 3173905               | ns                            | c                                    | UT189                                   | ++++                       | c      | c    | c   | c        | c       | c     | c      | c    | c         | c  | c        | c      | c     | c      | c    | c       | c    | c        | c       | c         | c       | c        | c         |
| t                  | 3245947                 | c                    | 3263042                   | c                | 3177826               | ns                            | t                                    | AS                                      | ++++                       | t      | t    | t   | t        | t       | t     | t      | t    | t         | t  | t        | t      | t     | t      | t    | t       | t    | t        | t       | t         | t       | t        | t         |
| t                  | 3248554                 | g                    | 3265649                   | g                | 3180433               | s                             | g                                    | UT189                                   | ++                         | g      | g    | g   | g        | g       | g     | g      | g    | g         | g  | g        | g      | g     | g      | g    | g       | g    | g        | g       | g         | g       | g        | g         |
| c                  | 3279697                 | t                    | 3296792                   | c                | 3211576               | ns                            | c                                    | APEC                                    | ++++                       | c      | c    | c   | c        | c       | c     | c      | c    | c         | c  | c        | c      | c     | c      | c    | c       | c    | c        | c       | c         | c       | c        | c         |
| a                  | 3280580                 | g                    | 3297675                   | g                | 3212459               | s                             | g                                    | UT189                                   | ++++                       | g      | g    | g   | g        | g       | g     | g      | g    | g         | g  | g        | g      | g     | g      | g    | g       | g    | g        | g       | g         | g       | g        | g         |
| g                  | 3285534                 | g                    | 3302629                   | a                | 3217413               | s                             | g                                    | S88                                     | ++++                       | g      | g    | g   | g        | g       | g     | g      | g    | g         | g  | g        | g      | g     | g      | g    | g       | g    | g        | g       | g         | g       | g        | g         |
| -                  | 3287997                 | g                    | 3316787                   | a                | 3231571               | nc                            | g                                    | S88                                     | ++                         | g      |      |     |          |         |       |        |      |           |    |          |        |       |        |      |         |      |          |         |           |         |          |           |
| -                  | 3287974                 | a                    | 3324534                   | g                | 3239318               | nc                            | g                                    | APEC                                    | +++                        | g      |      | g   |          |         |       |        |      |           |    |          |        |       |        |      |         |      |          |         |           |         |          |           |
| -                  | 3287974                 | g                    | 3340695                   | a                | 3255479               | nc                            | g                                    | S88                                     | ++                         | g      |      |     |          |         |       |        |      |           |    |          |        |       |        |      |         |      |          |         |           |         |          |           |
| -                  | 3287974                 | a                    | 3342053                   | g                | 3256837               | nc                            | g                                    | APEC                                    | ++++                       | g      | g    | g   | g        | g       | g     | g      |      |           |    |          |        |       |        |      |         |      |          |         |           |         |          |           |
| -                  | 3287974                 | -                    | 3346623                   | 8                | 3261408               | indel                         | -                                    | S88                                     | ++                         | -      |      |     |          |         |       |        |      |           |    |          |        |       |        |      |         |      |          |         |           |         |          |           |
| -                  | 3287974                 | a                    | 3346858                   | g                | 3261650               | nc                            | a                                    | S88                                     | ++                         | a      |      |     |          |         |       |        |      |           |    |          |        |       |        |      |         |      |          |         |           |         |          |           |
| -                  | 3287974                 | a                    | 3349782                   | t                | 3264574               | nc                            | t                                    | APEC                                    | ++                         | t      |      |     |          |         |       |        |      |           |    |          |        |       |        |      |         |      |          |         |           |         |          |           |
| -                  | 3287974                 | a                    | 3353196                   | g                | 3267988               | nc                            | g                                    | APEC                                    | +++                        | g      | g    | g   |          | g       | g     |        |      |           |    |          |        |       |        |      |         |      |          |         |           |         |          |           |
| -                  | 3287974                 | g                    | 3353634                   | a                | 3268426               | nc                            | g                                    | S88                                     | +++                        | g      | g    | g   | g        | g       | g     | g      | 1    | 1         | 1  | 1        | 1      | 1     | 1      | 1    | 1       | 1    | 1        | 1       | 1         | 1       | 1        | 1         |
| 1                  | 3287992                 | -                    | 3360899                   | -                | 3275691               | del                           | 1                                    | AS                                      | ++++                       | 1      | 1    | 1   | 1        | 1       | 1     | 1      | 1    | 1         | 1  | 1        | 1      | 1     | 1      | 1    | 1       | 1    | 1        | 1       | 1         | 1       | 1        | 1         |
| g                  | 3288757                 | t                    | 3361664                   | g                | 3276456               | nc                            | t                                    | APEC                                    | -                          | t      | a    | g   |          | g       |       |        |      |           |    |          |        |       |        |      |         |      |          |         |           |         |          |           |
| a                  | 3288878                 | g                    | 3361785                   | a                | 3276577               | nc                            | a                                    | APEC                                    | +++                        | a      | a    | a   | a        | a       | a     | a      |      |           |    |          |        |       |        |      |         |      |          |         |           |         |          |           |
| g                  | 3288889                 | g                    | 3361796                   | a                | 3276588               | nc                            | a                                    | S88                                     | -                          | a      | a    | t   | a        | a       | a     |        |      |           |    |          |        |       |        |      |         |      |          |         |           |         |          |           |
| t                  | 3289231                 | g                    | 3362138                   | t                | 3276930               | ns                            | t                                    | APEC                                    | +++                        | t      | t    | t   | t        | t       | t     |        |      |           |    |          |        |       |        |      |         |      |          |         |           |         |          |           |
| g                  | 3290356                 | a                    | 3363263                   | a                | 3278055               | ns                            | g                                    | AS                                      | +++                        | g      | g    | g   |          | g       | g     |        |      |           |    |          |        |       |        |      |         |      |          |         |           |         |          |           |
| a                  | 3298631                 | g                    | 3371538                   | g                | 3286330               | ns                            | g                                    | UT189                                   | +                          |        |      |     |          |         |       |        |      |           |    |          |        |       |        |      |         |      |          |         |           |         |          |           |
| c                  | 3306687                 | t                    | 3379594                   | c                | 3294386               | ns                            | c                                    | APEC                                    | ++++                       | c      | c    | c   | c        | c       | c     | c      | c    |           |    |          |        |       |        |      |         |      |          |         |           |         |          |           |
| g                  | 3306918                 | a                    | 3379825                   | g                | 3294617               | s                             | g                                    | APEC                                    | ++++                       | g      | g    | g   | g        | g       | g     | g      | g    |           |    |          |        |       |        |      |         |      |          |         |           |         |          |           |

| ExPEC Cluster      |                         |                      |                           |                  |                       | Outgroup Strains <sup>g</sup> |                                      |                                         |                            |        |      |     |          |         |       |        |      |           |    |          |        |       |        |     |         |      |          |         |           |         |          |           |
|--------------------|-------------------------|----------------------|---------------------------|------------------|-----------------------|-------------------------------|--------------------------------------|-----------------------------------------|----------------------------|--------|------|-----|----------|---------|-------|--------|------|-----------|----|----------|--------|-------|--------|-----|---------|------|----------|---------|-----------|---------|----------|-----------|
| UT189 <sup>a</sup> | UT189 site <sup>b</sup> | APEC 01 <sup>a</sup> | APEC 01 site <sup>b</sup> | S88 <sup>a</sup> | S88 site <sup>b</sup> | type <sup>c</sup>             | Inferred ancestral base <sup>d</sup> | Lineage inferred to mutate <sup>e</sup> | Support level <sup>f</sup> | CFT073 | ED1a | 536 | E2348/69 | SMS 3-5 | IAI39 | UMN026 | K-12 | ATCC 8729 | HS | D1 Sd197 | CB9615 | Sakai | ED1933 | IA1 | E24377A | SE11 | SS Ss046 | F2a 301 | F2a 2457T | F5 8401 | B4 Sd227 | B18 BS512 |
| a                  | 3420332                 | g                    | 3493238                   | a                | 3408030               | nc                            | a                                    | APEC                                    | ++                         | a      | a    | a   | a        | a       | a     | a      | a    | a         | a  | a        | a      | a     | a      | a   | a       | a    | a        | a       | a         | a       | a        | a         |
| c                  | 3427774                 | t                    | 3500680                   | t                | 3415472               | ns                            | t                                    | UT189                                   | ++                         | t      | t    | t   | t        | t       | t     | t      | t    | t         | t  | t        | t      | t     | t      | t   | t       | t    | t        | t       | t         | t       | t        | t         |
| c                  | 3444531                 | t                    | 3517437                   | t                | 3432229               | nc                            | t                                    | UT189                                   | ++                         | t      | t    | t   | t        | t       | t     | t      | t    | t         | t  | t        | t      | t     | t      | t   | t       | t    | t        | t       | t         | t       | t        | t         |
| g                  | 3446218                 | c                    | 3519124                   | c                | 3433916               | ns                            | g                                    | AS                                      | ++++                       | g      | g    | g   | g        | g       | g     | g      | g    | g         | g  | g        | g      | g     | g      | g   | g       | g    | g        | g       | g         | g       | g        | g         |
| c                  | 3446506                 | c                    | 3519412                   | t                | 3434204               | ns                            | c                                    | S88                                     | ++++                       | c      | c    | c   | c        | c       | c     | c      | c    | c         | c  | c        | c      | c     | c      | c   | c       | c    | c        | c       | c         | c       | c        | c         |
| g                  | 3450975                 | a                    | 3523881                   | g                | 3438673               | ns                            | g                                    | APEC                                    | ++++                       | g      | g    | g   | g        | g       | g     | g      | g    | g         | g  | g        | g      | g     | g      | g   | g       | g    | g        | g       | g         | g       | g        | g         |
| a                  | 3450997                 | t                    | 3523903                   | a                | 3438695               | ns                            | a                                    | APEC                                    | ++++                       | a      | a    | a   | a        | a       | a     | a      | a    | a         | a  | a        | a      | a     | a      | a   | a       | a    | a        | a       | a         | a       | a        | a         |
| t                  | 3455665                 | g                    | 3528571                   | g                | 3443363               | s                             | g                                    | UT189                                   | ++++                       | g      | g    | g   | g        | g       | g     | g      | g    | g         | g  | g        | g      | g     | g      | g   | g       | g    | g        | g       | g         | g       | g        | g         |
| g                  | 3471014                 | a                    | 3543920                   | g                | 3458712               | s                             | g                                    | APEC                                    | ++++                       | g      | g    | g   | g        | g       | g     | g      | g    | g         | g  | g        | g      | g     | g      | g   | g       | g    | g        | g       | g         | g       | g        | g         |
| g                  | 3481970                 | g                    | 3554876                   | a                | 3469668               | s                             | g                                    | S88                                     | ++++                       | g      | g    | g   | g        | g       | g     | g      | g    | g         | g  | g        | g      | g     | g      | g   | g       | g    | g        | g       | g         | g       | g        | g         |
| c                  | 3484595                 | c                    | 3557501                   | t                | 3472293               | ns                            | c                                    | S88                                     | ++++                       | c      | c    | c   | c        | c       | c     | c      | c    | c         | c  | c        | c      | c     | c      | c   | c       | c    | c        | c       | c         | c       | c        | c         |
| a                  | 3489993                 | a                    | 3562899                   | g                | 3477691               | ns                            | a                                    | S88                                     | ++++                       | a      | a    | a   | a        | a       | a     | a      | a    | a         | a  | a        | a      | a     | a      | a   | a       | a    | a        | a       | a         | a       | a        | a         |
| 6                  | 3491975                 | -                    | 3564880                   | -                | 3479672               | del                           | 6                                    | AS                                      | ++++                       | 6      | 6    | 6   | 6        | 6       | 6     | 6      | 6    | 6         | 6  | 6        | 6      | 6     | 6      | 6   | 6       | 6    | 6        | 6       | 6         | 6       | 6        | 6         |
| g                  | 3499438                 | a                    | 3572338                   | a                | 3487130               | s                             | g                                    | AS                                      | ++++                       | g      | g    | g   | g        | g       | g     | g      | g    | g         | g  | g        | g      | g     | g      | g   | g       | g    | g        | g       | g         | g       | g        | g         |
| g                  | 3507025                 | g                    | 3579925                   | t                | 3494717               | nc                            | g                                    | S88                                     | ++                         | g      | a    | g   | g        | g       | g     | g      | g    | g         | g  | g        | g      | g     | g      | g   | g       | g    | g        | g       | g         | g       | g        | g         |
| g                  | 3508405                 | g                    | 3581305                   | a                | 3496097               | s                             | g                                    | S88                                     | ++++                       | g      | g    | g   | g        | g       | g     | g      | g    | g         | g  | g        | g      | g     | g      | g   | g       | g    | g        | g       | g         | g       | g        | g         |
| t                  | 3513206                 | c                    | 3586106                   | t                | 3500898               | nc                            | t                                    | APEC                                    | ++++                       | t      | t    | t   | t        | t       | t     | t      | t    | t         | t  | t        | t      | t     | t      | t   | t       | t    | t        | t       | t         | t       | t        | t         |
| g                  | 3517552                 | a                    | 3590452                   | a                | 3590524               | ns                            | a                                    | UT189                                   | ++++                       | a      | a    | a   | a        | a       | a     | a      | a    | a         | a  | a        | a      | a     | a      | a   | a       | a    | a        | a       | a         | a       | a        | a         |
| c                  | 3525829                 | g                    | 3598729                   | g                | 3513521               | ns                            | g                                    | UT189                                   | ++++                       | g      | g    | g   | g        | g       | g     | g      | g    | g         | g  | g        | g      | g     | g      | g   | g       | g    | g        | g       | g         | g       | g        | g         |
| g                  | 3533540                 | g                    | 3606440                   | a                | 3521232               | s                             | g                                    | S88                                     | ++++                       | g      | g    | g   | g        | g       | g     | g      | g    | g         | g  | g        | g      | g     | g      | g   | g       | g    | g        | g       | g         | g       | g        | g         |
| a                  | 3550309                 | g                    | 3623209                   | g                | 3538001               | s                             | g                                    | UT189                                   | ++++                       | g      | g    | g   | g        | g       | g     | g      | g    | g         | g  | g        | g      | g     | g      | g   | g       | g    | g        | g       | g         | g       | g        | g         |
| c                  | 3550318                 | g                    | 3623218                   | g                | 3538010               | ns                            | g                                    | UT189                                   | ++                         | g      | g    | g   | g        | g       | g     | g      | g    | g         | g  | g        | g      | g     | g      | g   | a       | a    | a        | a       | a         | a       | a        | a         |
| -                  | 3550306                 | 12                   | 3623224                   | 12               | 3538016               | del                           | 12                                   | UT189                                   | ++++                       | 12     | 12   | 12  | 12       | 12      | 12    | 12     | 12   | 12        | 12 | 12       | 12     | 12    | 12     | 12  | 12      | 12   | 12       | 12      | 12        | 12      | 12       | 12        |
| t                  | 3552525                 | c                    | 3625437                   | c                | 3540229               | nc                            | c                                    | UT189                                   | ++++                       | c      | c    | c   | c        | c       | c     | c      | c    | c         | c  | c        | c      | c     | c      | c   | c       | c    | c        | c       | c         | c       | c        | c         |
| g                  | 3556685                 | a                    | 3629597                   | a                | 3544389               | s                             | g                                    | AS                                      | ++++                       | g      | g    | g   | g        | g       | g     | g      | g    | g         | g  | g        | g      | g     | g      | g   | g       | g    | g        | g       | g         | g       | g        | g         |
| a                  | 3567486                 | g                    | 3640398                   | a                | 3555190               | ns                            | a                                    | APEC                                    | ++++                       | a      | a    | a   | a        | a       | a     | a      | a    | a         | a  | a        | a      | a     | a      | a   | a       | a    | a        | a       | a         | a       | a        | a         |
| c                  | 3569723                 | c                    | 3642635                   | t                | 3557427               | ns                            | c                                    | S88                                     | ++++                       | c      | c    | c   | c        | c       | c     | c      | c    | c         | c  | c        | c      | c     | c      | c   | c       | c    | c        | c       | c         | c       | c        | c         |
| g                  | 3580723                 | a                    | 3653635                   | g                | 3568427               | ns                            | g                                    | APEC                                    | ++++                       | g      | g    | g   | g        | g       | g     | g      | g    | g         | g  | g        | g      | g     | g      | g   | g       | g    | g        | g       | g         | g       | g        | g         |
| g                  | 3583074                 | g                    | 3655986                   | a                | 3570778               | s                             | g                                    | S88                                     | ++++                       | g      | g    | g   | g        | g       | g     | g      | g    | g         | g  | g        | g      | g     | g      | g   | g       | g    | g        | g       | g         | g       | g        | g         |
| g                  | 3590721                 | g                    | 3663633                   | a                | 3578425               | s                             | g                                    | S88                                     | ++++                       | g      | g    | g   | g        | g       | g     | g      | g    | g         | g  | g        | g      | g     | g      | g   | g       | g    | g        | g       | g         | g       | g        | g         |
| c                  | 3598897                 | a                    | 3671809                   | c                | 3586601               | ns                            | c                                    | APEC                                    | ++++                       | c      | c    | c   | c        | c       | c     | c      | c    | c         | c  | c        | c      | c     | c      | c   | c       | c    | c        | c       | c         | c       | c        | c         |
| t                  | 3600484                 | t                    | 3673396                   | g                | 3588188               | ns                            | t                                    | S88                                     | ++++                       | t      | t    | t   | t        | t       | t     | t      | t    | t         | t  | t        | t      | t     | t      | t   | t       | t    | t        | t       | t         | t       | t        | t         |
| c                  | 3615102                 | c                    | 3688014                   | t                | 3602806               | s                             | c                                    | S88                                     | ++++                       | c      | c    | c   | c        | c       | c     | c      | c    | c         | c  | c        | c      | c     | c      | c   | c       | c    | c        | c       | c         | c       | c        | c         |
| g                  | 3624876                 | t                    | 3697788                   | t                | 3612580               | ns                            | g                                    | AS                                      | +++                        | g      | g    | g   | g        | g       | g     | g      | g    | g         | g  | g        | g      | g     | g      | g   | g       | g    | g        | g       | g         | g       | g        | g         |
| -                  | 3631731                 | -                    | 3704652                   | 1                | 3619445               | ins                           | -                                    | S88                                     | ++++                       | -      | -    | -   | -        | -       | -     | -      | -    | -         | -  | -        | -      | -     | -      | -   | -       | -    | -        | -       | -         | -       | -        | -         |
| t                  | 3633752                 | c                    | 3706664                   | c                | 3621457               | s                             | c                                    | UT189                                   | ++++                       | c      | c    | c   | c        | c       | c     | c      | c    | c         | c  | c        | c      | c     | c      | c   | c       | c    | c        | c       | c         | c       | c        | c         |
| t                  | 3639450                 | c                    | 3712362                   | c                | 3627155               | ns                            | c                                    | UT189                                   | ++++                       | c      | c    | c   | c        | c       | c     | c      | c    | c         | c  | c        | c      | c     | c      | c   | c       | c    | c        | c       | c         | c       | c        | c         |
| a                  | 3642556                 | g                    | 3715468                   | g                | 3630261               | ns                            | g                                    | UT189                                   | ++++                       | g      | g    | g   | g        | g       | g     | g      | g    | g         | g  | g        | g      | g     | g      | g   | g       | g    | g        | g       | g         | g       | g        | g         |
| c                  | 3643031                 | t                    | 3715943                   | c                | 3630736               | nc                            | c                                    | APEC                                    | ++                         | t      | c    | c   | c        | t       | t     | t      | t    | t         | t  | t        | t      | t     | t      | t   | t       | t    | t        | t       | t         | t       | t        | t         |
| g                  | 3643073                 | a                    | 3715985                   | g                | 3630778               | nc                            | g                                    | APEC                                    | ++                         | a      | g    | g   | g        | a       | a     | a      | a    | a         | a  | a        | a      | a     | a      | a   | a       | a    | a        | a       | a         | a       | a        | a         |
| g                  | 3644261                 | g                    | 3717176                   | a                | 3631966               | ns                            | g                                    | S88                                     | ++                         | a      | g    | g   | g        | g       | g     | g      | g    | g         | g  | g        | g      | g     | g      | g   | g       | g    | g        | g       | g         | g       | g        | g         |
| g                  | 3668419                 | a                    | 3741334                   | g                | 3656124               | ns                            | g                                    | APEC                                    | ++++                       | g      | g    | g   | g        | g       | g     | g      | g    | g         | g  | g        | g      | g     | g      | g   | g       | g    | g        | g       | g         | g       | g        | g         |
| -                  | 3672118                 | 1                    | 3745034                   | -                | 3659823               | ins                           | -                                    | APEC                                    | +++                        | -      | -    | -   | -        | -       | -     | -      | -    | -         | -  | -        | -      | -     | -      | -   | -       | -    | -        | -       | -         | -       | -        | -         |
| g                  | 3672132                 | t                    | 3745048                   | g                | 3659837               | s                             | g                                    | APEC                                    | +++                        | g      | g    | g   | g        | g       | g     | g      | g    | g         | g  | g        | g      | g     | g      | g   | g       | g    | g        | g       | g         | g       | g        | g         |
| -                  | 3672132                 | 2                    | 3745049                   | -                | 3659837               | ins                           | -                                    | APEC                                    | +++                        | -      | -    | -   | -        | -       | -     | -      | -    | -         | -  | -        | -      | -     | -      | -   | -       | -    | -        | -       | -         | -       | -        | -         |
| -                  | 3672136                 | 1                    | 3745055                   | -                | 3659841               | ins                           | -                                    | APEC                                    | +++                        | -      | -    | -   | -        | -       | -     | -      | -    | -         | -  | -        | -      | -     | -      | -   | -       | -    | -        | -       | -         | -       | -        | -         |
| -                  | 3672148                 | 1                    | 3745068                   | -                | 3659853               | ins                           | -                                    | APEC                                    | +++                        | -      | -    | -   | -        | -       | -     | -      | -    | -         | -  | -        | -      | -     | -      | -   | -       | -    | -        | -       | -         | -       | -        | -         |
| -                  | 3672161                 | 1                    | 3745082                   | -                | 3659866               | ins                           | -                                    | APEC                                    | +++                        | -      | -    | -   | -        | -       | -     | -      | -    | -         | -  | -        | -      | -     | -      | -   | -       | -    | -        | -       | -         | -       | -        | -         |
| -                  | 3672164                 | 1                    | 3745086                   | -                | 3659869               | ins                           | -                                    | APEC                                    | +++                        | -      | -    | -   | -        | -       | -     | -      | -    | -         | -  | -        | -      | -     | -      | -   | -       | -    | -        | -       | -         | -       | -        | -         |
| -                  | 3672202                 | 1                    | 3745125                   | -                | 3659907               | ins                           | -                                    | APEC                                    | +++                        | -      | -    | -   | -        | -       | -     | -      | -    | -         | -  | -        | -      | -     | -      | -   | -       | -    | -        | -       | -         | -       | -        | -         |
| -                  | 3672219                 | 1                    | 3745143                   | -                | 3659924               | ins                           | -                                    | APEC                                    | +++                        | -      | -    | -   | -        | -       | -     | -      | -    | -         | -  | -        | -      | -     | -      | -   | -       | -    | -        | -       | -         | -       | -        | -         |
| -                  | 3672236                 | 1                    | 3745161                   | -                | 3659941               | ins                           | -                                    | APEC                                    | +++                        | -      | -    | -   | -        | -       | -     | -      | -    | -         | -  | -        | -      | -     | -      | -   | -       | -    | -        | -       | -         | -       | -        | -         |
| -                  | 3672241                 | 1                    | 3745167                   | -                | 3659946               | ins                           | -                                    | APEC                                    | +++                        | -      | -    | -   | -        | -       | -     | -      | -    | -         | -  | -        | -      | -     | -      | -   | -       | -    | -        | -       | -         | -       | -        | -         |
| 13                 | 3672855                 | -                    | 3745780                   | -                | 3660559               | del                           | 13                                   | AS                                      | +++                        | 13     | 13   | 13  | 13       | 13      | 13    | 13     | 13   | 13        | 13 | 13       | 13     | 13    | 13     | 13  | 13      | 13   | 13       | 13      | 13        | 13      | 13       | 13        |
| -                  | 3672855                 | -                    | 3745799                   | 13               | 3660560               | ins                           | 13                                   | S88                                     | -                          | 13     | 13   | 13  | 13       | 13      | 13    | 13     | 13   | 13        | 13 | 13       | 13     | 13    | 13     | 13  | 13      | 13   | 13       | 13      | 13        | 13      | 13       | 13        |
| -                  | 3672867                 | 19                   | 3745781                   | -                | 3660559               | ins                           | -                                    | APEC                                    | +++                        | -      | -    | -   | -        | -       | -     | -      | -    | -         | -  | -        | -      | -     | -      | -   | -       | -    | -        | -       | -         | -       | -        | -         |
| -                  | 3672889                 | 1                    | 3745822                   | -                |                       |                               |                                      |                                         |                            |        |      |     |          |         |       |        |      |           |    |          |        |       |        |     |         |      |          |         |           |         |          |           |

Table S7. Allocation of mutational SNPs to lineages by virtual outgroup analysis

[illegible]

Table S7. Allocation of mutational SNPs to lineages by virtual outgroup analysis

| ExPEC Cluster      |                         |                      |                           |                  |                       | Outgroup Strains <sup>g</sup> |                                      |                                         |                            |        |      |     |          |         |       |        |      |           |    |          |        |       |        |     |         |      |          |         |           |         |          |           |    |
|--------------------|-------------------------|----------------------|---------------------------|------------------|-----------------------|-------------------------------|--------------------------------------|-----------------------------------------|----------------------------|--------|------|-----|----------|---------|-------|--------|------|-----------|----|----------|--------|-------|--------|-----|---------|------|----------|---------|-----------|---------|----------|-----------|----|
| UTI89 <sup>a</sup> | UTI89 site <sup>b</sup> | APEC 01 <sup>a</sup> | APEC 01 site <sup>b</sup> | S88 <sup>a</sup> | S88 site <sup>b</sup> | type <sup>c</sup>             | Inferred ancestral base <sup>d</sup> | Lineage inferred to mutate <sup>e</sup> | Support level <sup>f</sup> | CFT073 | ED1a | 536 | E2348/69 | SMS 3-5 | IAI39 | UMN026 | K-12 | ATCC 8739 | HS | D1 Sd197 | CB9615 | Sakai | ED1933 | IA1 | E24377A | SE11 | SS Ss046 | F2a 301 | F2a 2457T | F5 8401 | B4 Sd227 | B18 BS512 |    |
| 1                  | 4124218                 | 1                    | 4157025                   | -                | 4071738               | del                           | 1                                    | S88                                     | ++++                       | 1      | 1    | 1   | 1        | 1       | 1     | 1      | 1    | 1         | 1  | 1        | 1      | 1     | 1      | 1   | 1       | 1    | 1        | 1       | 1         | 1       | 1        | 1         |    |
| g                  | 4133561                 | a                    | 4166358                   | a                | 4081071               | ns                            | a                                    | UTI89                                   | ++++                       | a      | a    | a   | a        | a       | a     | a      | a    | a         | a  | a        | a      | a     | a      | a   | a       | a    | a        | a       | a         | a       | a        | a         |    |
| a                  | 4138967                 | a                    | 4171764                   | g                | 4086477               | s                             | a                                    | S88                                     | ++++                       | a      | a    | a   | a        | a       | a     | a      | a    | a         | a  | a        | a      | a     | a      | a   | a       | a    | a        | a       | a         | a       | a        | a         |    |
| g                  | 4157079                 | t                    | 4189876                   | t                | 4104589               | s                             | g                                    | AS                                      | ++                         | g      | g    | g   | g        | g       | g     | g      | g    | g         | g  | g        | g      | g     | g      | g   | g       | g    | g        | g       | g         | g       | g        | g         |    |
| c                  | 4158139                 | t                    | 4190936                   | c                | 4105649               | ns                            | c                                    | APEC                                    | ++++                       | c      | c    | c   | c        | c       | c     | c      | c    | c         | c  | c        | c      | c     | c      | c   | c       | c    | c        | c       | c         | c       | c        | c         |    |
| g                  | 4158435                 | g                    | 4191232                   | a                | 4105945               | nc                            | g                                    | S88                                     | ++                         | g      | g    | g   | g        | g       | g     | g      | g    | g         | g  | g        | g      | g     | g      | g   | g       | g    | g        | g       | g         | g       | g        | g         |    |
| 5                  | 4158742                 | -                    | 4191538                   | -                | 4106251               | ins                           | -                                    | UTI89                                   | ++++                       | -      | -    | -   | -        | -       | -     | -      | -    | -         | -  | -        | -      | -     | -      | -   | -       | -    | -        | -       | -         | -       | -        | -         |    |
| c                  | 4160304                 | g                    | 4193096                   | g                | 4107809               | ns                            | g                                    | UTI89                                   | ++++                       | a      | g    | g   | g        | g       | g     | g      | g    | g         | g  | g        | g      | g     | g      | g   | g       | g    | g        | g       | g         | g       | g        | g         |    |
| g                  | 4168607                 | g                    | 4201399                   | a                | 4116112               | s                             | g                                    | S88                                     | ++++                       | g      | g    | g   | g        | g       | g     | g      | g    | g         | g  | g        | g      | g     | g      | g   | g       | g    | g        | g       | g         | g       | g        | g         |    |
| a                  | 4172397                 | g                    | 4205189                   | g                | 4119902               | nc                            | g                                    | UTI89                                   | ++++                       | g      | g    | g   | g        | g       | g     | g      | g    | g         | g  | g        | g      | g     | g      | g   | g       | g    | g        | g       | g         | g       | g        | g         |    |
| -                  | 4172678                 | 5                    | 4205471                   | -                | 4120183               | ins                           | -                                    | APEC                                    | +++                        | -      | -    | -   | -        | -       | -     | -      | -    | -         | -  | -        | -      | -     | -      | -   | -       | -    | -        | -       | -         | -       | -        | -         |    |
| c                  | 4173610                 | t                    | 4206407                   | t                | 4121115               | ns                            | c                                    | AS                                      | ++++                       | c      | c    | c   | c        | c       | c     | c      | c    | c         | c  | c        | c      | c     | c      | c   | c       | c    | c        | c       | c         | c       | c        | c         |    |
| g                  | 4173711                 | t                    | 4206508                   | g                | 4121216               | ns                            | g                                    | APEC                                    | ++++                       | g      | g    | g   | g        | g       | g     | g      | g    | g         | g  | g        | g      | g     | g      | g   | g       | g    | g        | g       | g         | g       | g        | g         |    |
| t                  | 4174585                 | a                    | 4207382                   | a                | 4122090               | nc                            | t                                    | AS                                      | ++++                       | t      | t    | t   | t        | t       | t     | t      | t    | t         | t  | t        | t      | t     | t      | t   | t       | t    | t        | t       | t         | t       | t        | t         |    |
| g                  | 4176975                 | a                    | 4209772                   | g                | 4124480               | s                             | g                                    | APEC                                    | ++++                       | g      | g    | g   | g        | g       | g     | g      | g    | g         | g  | g        | g      | g     | g      | g   | g       | g    | g        | g       | g         | g       | g        | g         | g  |
| c                  | 4179841                 | a                    | 4212638                   | a                | 4127346               | s                             | a                                    | UTI89                                   | ++++                       | a      | a    | a   | a        | a       | a     | a      | a    | a         | a  | a        | a      | a     | a      | a   | a       | a    | a        | a       | a         | a       | a        | a         | a  |
| g                  | 4183713                 | g                    | 4216510                   | t                | 4131218               | nc                            | g                                    | S88                                     | ++                         | a      | g    | g   | g        | g       | g     | g      | g    | g         | g  | g        | g      | g     | g      | g   | g       | g    | g        | g       | g         | g       | g        | g         | g  |
| a                  | 4187124                 | g                    | 4219921                   | g                | 4134629               | ns                            | g                                    | UTI89                                   | ++++                       | g      | g    | g   | g        | g       | g     | g      | g    | g         | g  | g        | g      | g     | g      | g   | g       | g    | g        | g       | g         | g       | g        | g         | g  |
| c                  | 4202885                 | a                    | 4235682                   | a                | 4150390               | nc                            | c                                    | AS                                      | ++++                       | c      | c    | c   | a        | c       | c     | c      | c    | c         | c  | c        | c      | c     | c      | c   | c       | c    | c        | c       | c         | c       | c        | c         | c  |
| g                  | 4204502                 | a                    | 4237299                   | a                | 4152007               | nc                            | a                                    | UTI89                                   | ++                         | a      | g    | a   | g        | a       | a     | a      | a    | a         | a  | a        | a      | a     | a      | a   | a       | a    | a        | a       | a         | a       | a        | a         | a  |
| a                  | 4204544                 | g                    | 4237341                   | g                | 4152049               | nc                            | a                                    | AS                                      | ++                         | a      | a    | a   | a        | -       | a     | a      | a    | a         | a  | a        | a      | a     | a      | a   | a       | a    | a        | a       | a         | a       | a        | a         | a  |
| c                  | 4204887                 | c                    | 4237684                   | t                | 4152392               | ns                            | c                                    | S88                                     | ++                         | c      | c    | c   | c        | c       | t     | c      | c    | c         | c  | c        | c      | c     | c      | c   | t       | t    | t        | c       | t         | t       | t        | t         | t  |
| a                  | 4207259                 | g                    | 4240056                   | g                | 4154764               | nc                            | g                                    | UTI89                                   | ++++                       | g      | g    | g   | g        | g       | g     | g      | g    | g         | g  | g        | g      | g     | g      | g   | g       | g    | g        | g       | g         | g       | g        | g         | g  |
| g                  | 4208037                 | t                    | 4240834                   | g                | 4155542               | ns                            | g                                    | APEC                                    | ++++                       | g      | g    | g   | g        | g       | g     | g      | g    | g         | g  | g        | g      | g     | g      | g   | g       | g    | g        | g       | g         | g       | g        | g         | g  |
| c                  | 4214370                 | c                    | 4247167                   | t                | 4161875               | ns                            | c                                    | S88                                     | ++++                       | c      | c    | c   | c        | c       | c     | c      | c    | c         | c  | c        | c      | c     | c      | c   | c       | c    | c        | c       | c         | c       | c        | c         | c  |
| t                  | 4216893                 | g                    | 4246990                   | t                | 4164398               | ns                            | t                                    | APEC                                    | ++++                       | t      | t    | t   | t        | t       | t     | t      | t    | t         | t  | t        | t      | t     | t      | t   | t       | t    | t        | t       | t         | t       | t        | t         | t  |
| t                  | 4218285                 | c                    | 4251082                   | t                | 4165790               | s                             | t                                    | APEC                                    | ++++                       | t      | t    | t   | t        | t       | t     | t      | t    | t         | t  | t        | t      | t     | t      | t   | t       | t    | t        | t       | t         | t       | t        | t         | t  |
| t                  | 4239927                 | c                    | 4272724                   | c                | 4187432               | ns                            | c                                    | UTI89                                   | ++++                       | c      | c    | c   | c        | c       | c     | c      | c    | c         | c  | c        | c      | c     | c      | c   | c       | c    | c        | c       | c         | c       | c        | c         | c  |
| g                  | 4242503                 | c                    | 4275300                   | g                | 4190008               | nc                            | g                                    | APEC                                    | ++++                       | g      | g    | g   | g        | g       | g     | g      | g    | g         | g  | g        | g      | g     | g      | g   | g       | g    | g        | g       | g         | g       | g        | g         | g  |
| 6                  | 4247939                 | -                    | 4280735                   | -                | 4195443               | del                           | 6                                    | AS                                      | ++                         | 6      | 6    | 6   | 6        | 6       | -     | 6      | -    | -         | -  | -        | -      | -     | 6      | 6   | 6       | 6    | 6        | 6       | 6         | 6       | 6        | 6         | 6  |
| 6                  | 4247935                 | 6                    | 4280736                   | -                | 4195443               | del                           | 6                                    | S88                                     | ++                         | 6      | 6    | 6   | 6        | 6       | -     | 6      | -    | -         | -  | -        | -      | -     | 6      | 6   | 6       | 6    | 6        | 6       | 6         | 6       | 6        | 6         | 6  |
| g                  | 4247989                 | g                    | 4280780                   | a                | 4195482               | s                             | g                                    | S88                                     | ++++                       | g      | g    | g   | g        | g       | g     | g      | g    | g         | g  | g        | g      | g     | g      | g   | g       | g    | g        | g       | g         | g       | g        | g         | g  |
| t                  | 4250508                 | c                    | 4283299                   | c                | 4198001               | s                             | c                                    | UTI89                                   | ++++                       | c      | c    | c   | c        | c       | c     | c      | c    | c         | c  | c        | c      | c     | c      | c   | c       | c    | c        | c       | c         | c       | c        | c         | c  |
| g                  | 4256863                 | a                    | 4288878                   | a                | 4203580               | ns                            | g                                    | AS                                      | ++++                       | g      | g    | g   | g        | g       | g     | g      | g    | g         | g  | g        | g      | g     | g      | g   | g       | g    | g        | g       | g         | g       | g        | g         | g  |
| a                  | 4260364                 | g                    | 4292379                   | g                | 4207081               | s                             | g                                    | UTI89                                   | ++++                       | g      | g    | g   | g        | g       | g     | g      | g    | g         | g  | g        | g      | g     | g      | g   | g       | g    | g        | g       | g         | g       | g        | g         | g  |
| g                  | 4261500                 | g                    | 4293515                   | a                | 4208217               | ns                            | g                                    | S88                                     | ++++                       | g      | g    | g   | g        | g       | g     | g      | g    | g         | g  | g        | g      | g     | g      | g   | g       | g    | g        | g       | g         | g       | g        | g         | g  |
| t                  | 4264120                 | t                    | 4296135                   | g                | 4210837               | ns                            | t                                    | S88                                     | ++++                       | t      | t    | t   | t        | t       | t     | t      | t    | t         | t  | t        | t      | t     | t      | t   | t       | t    | t        | t       | t         | t       | t        | t         | t  |
| g                  | 4267068                 | a                    | 4299083                   | a                | 4213785               | ns                            | g                                    | AS                                      | ++++                       | g      | g    | g   | g        | g       | g     | g      | g    | g         | g  | g        | g      | g     | g      | g   | g       | g    | g        | g       | g         | g       | g        | g         | g  |
| t                  | 4267978                 | c                    | 4299993                   | c                | 4214695               | ns                            | c                                    | UTI89                                   | ++++                       | c      | c    | c   | c        | c       | c     | c      | c    | c         | c  | c        | c      | c     | c      | c   | c       | c    | c        | c       | c         | c       | c        | c         | c  |
| c                  | 4277937                 | a                    | 4309952                   | c                | 4224505               | ns                            | c                                    | APEC                                    | ++                         | c      | c    | c   | c        | c       | c     | c      | t    | t         | c  | c        | t      | t     | t      | c   | c       | c    | t        | t       | t         | t       | t        | t         | t  |
| g                  | 4282540                 | t                    | 4314555                   | t                | 4229108               | ns                            | g                                    | AS                                      | +++                        | g      | g    | g   | g        | g       | g     | g      | g    | g         | g  | g        | g      | g     | g      | g   | g       | g    | g        | g       | g         | g       | g        | g         | g  |
| a                  | 4287127                 | a                    | 4319142                   | g                | 4233695               | ns                            | a                                    | S88                                     | +++                        | a      | a    | a   | a        | a       | a     | a      | a    | a         | a  | a        | a      | a     | a      | a   | a       | a    | a        | a       | a         | a       | a        | a         | a  |
| c                  | 4288098                 | t                    | 4320113                   | t                | 4234666               | ns                            | c                                    | AS                                      | +++                        | c      | c    | c   | c        | c       | c     | c      | c    | c         | c  | c        | c      | c     | c      | c   | c       | c    | c        | c       | c         | c       | c        | c         | c  |
| a                  | 4303644                 | a                    | 4335659                   | g                | 4250212               | nc                            | a                                    | S88                                     | +++                        | a      | a    | a   | a        | a       | a     | a      | a    | a         | a  | a        | a      | a     | a      | a   | a       | a    | a        | a       | a         | a       | a        | a         | a  |
| t                  | 4308604                 | c                    | 4340619                   | c                | 4255172               | ns                            | c                                    | UTI89                                   | ++++                       | c      | c    | c   | c        | c       | c     | c      | c    | c         | c  | c        | c      | c     | c      | c   | c       | c    | c        | c       | c         | c       | c        | c         | c  |
| a                  | 4308862                 | g                    | 4340877                   | a                | 4255430               | ns                            | a                                    | APEC                                    | ++++                       | a      | a    | a   | a        | a       | a     | a      | a    | a         | a  | a        | a      | a     | a      | a   | a       | a    | a        | a       | a         | a       | a        | a         | a  |
| a                  | 4308923                 | g                    | 4340938                   | g                | 4255491               | s                             | g                                    | UTI89                                   | ++++                       | g      | g    | g   | g        | g       | g     | g      | g    | g         | g  | g        | g      | g     | g      | g   | g       | g    | g        | g       | g         | g       | g        | g         | g  |
| t                  | 4314651                 | c                    | 4346666                   | c                | 4261219               | ns                            | c                                    | UTI89                                   | ++++                       | c      | c    | c   | c        | c       | c     | c      | c    | c         | c  | c        | c      | c     | c      | c   | c       | c    | c        | c       | c         | c       | c        | c         | c  |
| t                  | 4319323                 | a                    | 4351338                   | a                | 4265891               | ns                            | a                                    | UTI89                                   | ++++                       | a      | a    | a   | a        | a       | a     | a      | a    | a         | a  | a        | a      | a     | a      | a   | a       | a    | a        | a       | a         | a       | a        | a         | a  |
| 1                  | 4321682                 | 1                    | 4353707                   | -                | 4268259               | del                           | 1                                    | S88                                     | ++++                       | 1      | 1    | 1   | 1        | 1       | 1     | 1      | 1    | 1         | 1  | 1        | 1      | 1     | 1      | 1   | 1       | 1    | 1        | 1       | 1         | 1       | 1        | 1         | 1  |
| -                  | 4323809                 | -                    | 4355834                   | 17               | 4270376               | ins                           | 17                                   | S88                                     | ++                         | -      | 17   | 17  | 17       | 17      | -     | 17     | 17   | 17        | 17 | -        | 17     | 17    | 17     | 17  | 17      | 17   | 17       | 17      | 17        | 17      | 17       | 17        | 17 |
| t                  | 4326969                 | a                    | 4358981                   | a                | 4273536               | nc                            | a                                    | UTI89                                   | ++                         | a      | a    | t   | t        | a       | a     | a      | a    | a         | a  | a        | a      | a     | a      | a   | a       | a    | a        | a       | a         | a       | a        | a         | a  |
| -                  | 4326980                 | 1                    | 4358993                   | -                | 4273547               | ins                           | 1                                    | APEC                                    | -                          | 1      | -    | 1   | 1        | -       | -     | -      | 1    | -         | -  | -        | -      | -     | -      | 1   | -       | -    | -        | -       | -         | -       | -        | -         | -  |
| c                  | 4327063                 | t                    | 4359077                   | c                | 4273630               | s                             | t                                    | APEC                                    | -                          | t      | t    | t   | t        | t       | t     | t      | t    | t         | t  | t        | t      | t     | t      | t   | t       | t    | t        | t       | t         | t       | t        | t         | t  |
| g                  | 4327420                 | a                    | 4359434                   | g                | 4273987               | s                             | g                                    | APEC                                    | ++++                       | a      | g    | g   | g        | g       | g     | g      | g    | g         | g  | g        | g      | g     | g      | g   | g       | g    | g        | g       | g         | g       | g        | g         | g  |
| c                  | 4327628                 | c                    | 4359642                   | t                | 4274195               | ns                            | c                                    |                                         |                            |        |      |     |          |         |       |        |      |           |    |          |        |       |        |     |         |      |          |         |           |         |          |           |    |

| ExPEC Cluster      |                         |                      |                           |                  |                       | Outgroup Strains <sup>g</sup> |                                      |                                         |                            |        |      |     |          |         |       |        |      |           |    |          |        |       |        |      |         |      |          |         |           |         |          |           |   |
|--------------------|-------------------------|----------------------|---------------------------|------------------|-----------------------|-------------------------------|--------------------------------------|-----------------------------------------|----------------------------|--------|------|-----|----------|---------|-------|--------|------|-----------|----|----------|--------|-------|--------|------|---------|------|----------|---------|-----------|---------|----------|-----------|---|
| UT189 <sup>a</sup> | UT189 site <sup>b</sup> | APEC 01 <sup>a</sup> | APEC 01 site <sup>b</sup> | S88 <sup>a</sup> | S88 site <sup>b</sup> | type <sup>c</sup>             | Inferred ancestral base <sup>d</sup> | Lineage inferred to mutate <sup>e</sup> | Support level <sup>f</sup> | CFT073 | ED1a | 536 | E2348/69 | SMS 3-5 | IAI39 | UMN026 | K-12 | ATCC 8739 | HS | D1 Sd197 | CB9615 | Sakai | EDL933 | IAI1 | E24377A | SE11 | SS Ss046 | F2a 301 | F2a 2457T | F5 8401 | B4 Sd227 | B18 BS512 |   |
| t                  | 4439821                 | c                    | 4471835                   | c                | 4386485               | ns                            | c                                    | UT189                                   | ++++                       | c      | c    | c   | c        | c       | c     | c      | c    | c         | c  | c        | c      | c     | c      | c    | c       | c    | c        | c       | c         | c       | c        | c         |   |
| g                  | 4451182                 | c                    | 4483196                   | c                | 4397846               | s                             | c                                    | UT189                                   | ++++                       | c      | c    | c   | c        | c       | c     | c      | c    | c         | c  | c        | c      | c     | c      | c    | c       | c    | c        | c       | c         | c       | c        | c         |   |
| t                  | 4456503                 | c                    | 4488517                   | c                | 4403167               | nc                            | t                                    | AS                                      | ++++                       | t      | c    | t   | t        | t       | t     | t      | t    | t         | t  | t        | t      | t     | t      | t    | t       | t    | t        | t       | t         | t       | t        | t         |   |
| c                  | 4456576                 | a                    | 4488591                   | a                | 4403241               | nc                            | c                                    | AS                                      | ++++                       | c      | c    | c   | c        | c       | c     | c      | c    | c         | c  | c        | c      | c     | c      | c    | c       | c    | c        | c       | c         | c       | c        | c         |   |
| a                  | 4470134                 | t                    | 4542436                   | t                | 4456964               | ns                            | a                                    | AS                                      | ++++                       | a      | a    | a   | a        | a       | a     | a      | a    | a         | a  | a        | a      | a     | a      | a    | a       | a    | a        | a       | a         | a       | a        | a         |   |
| a                  | 4478703                 | g                    | 4551005                   | g                | 4465533               | ns                            | g                                    | UT189                                   | ++++                       | g      | g    | g   | g        | g       | g     | g      | g    | g         | g  | g        | g      | g     | g      | g    | g       | g    | g        | g       | g         | g       | g        | g         |   |
| g                  | 4478744                 | t                    | 4551046                   | t                | 4465574               | s                             | g                                    | AS                                      | ++++                       | g      | g    | g   | g        | g       | g     | g      | g    | g         | g  | g        | g      | g     | g      | g    | g       | g    | g        | g       | g         | g       | g        | g         |   |
| t                  | 4481797                 | a                    | 4554099                   | a                | 4468627               | s                             | a                                    | UT189                                   | ++++                       | a      | a    | a   | a        | a       | a     | a      | a    | a         | a  | a        | a      | a     | a      | a    | a       | a    | a        | a       | a         | a       | a        | a         |   |
| c                  | 4492351                 | t                    | 4564653                   | t                | 4479181               | ns                            | c                                    | AS                                      | ++++                       | c      | c    | c   | c        | c       | c     | c      | c    | c         | c  | c        | c      | c     | c      | c    | c       | c    | c        | c       | c         | c       | c        | c         |   |
| a                  | 4500681                 | g                    | 4572983                   | g                | 4487511               | ns                            | g                                    | UT189                                   | ++++                       | g      | g    | g   | g        | g       | g     | g      | g    | g         | g  | g        | g      | g     | g      | g    | g       | g    | g        | g       | g         | g       | g        | g         |   |
| g                  | 4501489                 | a                    | 4573791                   | a                | 4488319               | s                             | g                                    | AS                                      | ++++                       | g      | g    | g   | g        | g       | g     | g      | g    | g         | g  | g        | g      | g     | g      | g    | g       | g    | g        | g       | g         | g       | g        | g         |   |
| t                  | 4505609                 | c                    | 4577911                   | c                | 4492439               | s                             | c                                    | UT189                                   | ++++                       | c      | c    | c   | c        | c       | c     | c      | c    | c         | c  | c        | c      | c     | c      | c    | c       | c    | c        | c       | c         | c       | c        | c         |   |
| t                  | 4517245                 | a                    | 4589547                   | a                | 4504075               | ns                            | a                                    | UT189                                   | ++                         | a      |      |     |          |         |       |        |      |           |    |          |        |       |        |      |         |      |          |         |           |         |          |           |   |
| a                  | 4517608                 | t                    | 4589910                   | a                | 4504438               | nc                            | a                                    | APEC                                    | ++                         | a      |      |     |          |         |       |        |      |           |    |          |        |       |        |      |         |      |          |         |           |         |          |           |   |
| c                  | 4527611                 | t                    | 4599913                   | t                | 4514441               | s                             | c                                    | AS                                      | +++                        | c      | c    | c   | c        |         |       |        |      |           |    |          |        |       |        |      |         |      |          |         |           |         |          |           |   |
| c                  | 4532922                 | a                    | 4605224                   | a                | 4519752               | ns                            | a                                    | UT189                                   | +++                        | a      | a    | a   | a        |         |       |        |      |           |    |          |        |       |        |      |         |      |          |         |           |         |          |           |   |
| g                  | 4535506                 | g                    | 4607808                   | a                | 4522336               | ns                            | g                                    | S88                                     | +++                        | g      | g    | g   | g        |         |       |        |      |           |    |          |        |       |        |      |         |      |          |         |           |         |          |           |   |
| c                  | 4539161                 | a                    | 4611463                   | c                | 4525991               | ns                            | c                                    | APEC                                    | ++++                       | c      | c    | c   | c        | c       | c     | c      | c    | c         | c  | c        | c      | c     | c      | c    | c       | c    | c        | c       | c         | c       | c        | c         |   |
| t                  | 4547605                 | t                    | 4619907                   | g                | 4534435               | s                             | t                                    | S88                                     | ++++                       | t      | t    | t   | t        | t       | t     | t      | t    | t         | t  | t        | t      | t     | t      | t    | t       | t    | t        | t       | t         | t       | t        | t         |   |
| t                  | 4548569                 | g                    | 4620871                   | g                | 4535399               | ns                            | g                                    | UT189                                   | ++++                       | g      | g    | g   | g        | g       | g     | g      | g    | g         | g  | g        | g      | g     | g      | g    | g       | g    | g        | g       | g         | g       | g        | g         |   |
| t                  | 4563564                 | c                    | 4635866                   | c                | 4550394               | nc                            | c                                    | UT189                                   | ++                         | c      | c    | c   | c        | c       | c     | c      | c    | c         | c  | c        | c      | c     | c      | c    | c       | c    | c        | c       | c         | c       | c        | c         |   |
| t                  | 4575924                 | c                    | 4648226                   | c                | 4562754               | s                             | c                                    | UT189                                   | ++++                       | c      | c    | c   | c        | c       | c     | c      | c    | c         | c  | c        | c      | c     | c      | c    | c       | c    | c        | c       | c         | c       | c        | c         |   |
| t                  | 4587439                 | -                    | 4659740                   | -                | 4574268               | ins                           | -                                    | UT189                                   | ++++                       | -      | -    | -   | -        | -       | -     | -      | -    | -         | -  | -        | -      | -     | -      | -    | -       | -    | -        | -       | -         | -       | -        | -         |   |
| g                  | 4589577                 | a                    | 4661878                   | a                | 4576406               | s                             | g                                    | AS                                      | ++++                       | g      | g    | g   | g        | g       | g     | g      | g    | g         | g  | g        | g      | g     | g      | g    | g       | g    | g        | g       | g         | g       | g        | g         |   |
| g                  | 4592588                 | g                    | 4664889                   | a                | 4579417               | s                             | g                                    | S88                                     | ++++                       | g      | g    | g   | g        | g       | g     | g      | g    | g         | g  | g        | g      | g     | g      | g    | g       | g    | g        | g       | g         | g       | g        | g         |   |
| c                  | 4594196                 | c                    | 4666497                   | t                | 4581025               | s                             | c                                    | S88                                     | ++++                       | c      | c    | c   | c        | c       | c     | c      | c    | c         | c  | c        | c      | c     | c      | c    | c       | c    | c        | c       | c         | c       | c        | c         |   |
| c                  | 4595967                 | t                    | 4668268                   | c                | 4582796               | ns                            | c                                    | APEC                                    | ++++                       | c      | c    | c   | c        | c       | c     | c      | c    | c         | c  | c        | c      | c     | c      | c    | c       | c    | c        | c       | c         | c       | c        | c         |   |
| c                  | 4597175                 | t                    | 4669476                   | c                | 4584004               | s                             | c                                    | APEC                                    | ++++                       | c      | c    | c   | c        | c       | c     | c      | c    | c         | c  | c        | c      | c     | c      | c    | c       | c    | c        | c       | c         | c       | c        | c         |   |
| c                  | 4606547                 | t                    | 4678848                   | t                | 4593376               | s                             | c                                    | AS                                      | ++++                       | c      | c    | c   | c        | c       | c     | c      | c    | c         | c  | c        | c      | c     | c      | c    | c       | c    | c        | c       | c         | c       | c        | c         |   |
| a                  | 4609416                 | g                    | 4681717                   | g                | 4596245               | nc                            | g                                    | UT189                                   | ++                         | g      | g    | g   | g        | g       | g     | g      | g    | g         | g  | g        | g      | g     | g      | g    | g       | g    | g        | g       | g         | g       | g        | g         |   |
| c                  | 4611716                 | t                    | 4684017                   | c                | 4598545               | nc                            | c                                    | APEC                                    | ++++                       | c      | c    | c   | c        | c       | c     | c      | c    | c         | c  | c        | c      | c     | c      | c    | c       | c    | c        | c       | c         | c       | c        | c         |   |
| a                  | 4619731                 | c                    | 4692032                   | c                | 4606560               | ns                            | c                                    | UT189                                   | ++++                       | c      | c    | c   | c        | c       | c     | c      | c    | c         | c  | c        | c      | c     | c      | c    | c       | c    | c        | c       | c         | c       | c        | c         |   |
| t                  | 4624459                 | g                    | 4696760                   | g                | 4611288               | ns                            | g                                    | UT189                                   | ++++                       | g      | g    | g   | g        | g       | g     | g      | g    | g         | g  | g        | g      | g     | g      | g    | g       | g    | g        | g       | g         | g       | g        | g         |   |
| t                  | 4624611                 | -                    | 4696911                   | -                | 4611439               | del                           | 1                                    | AS                                      | ++                         | 1      | -    | 1   | 1        | 1       | 1     | 1      | 1    | 1         | 1  | 1        | 1      | 1     | 1      | 1    | 1       | 1    | 1        | 1       | 1         | 1       | 1        | 1         |   |
| a                  | 4632392                 | a                    | 4704692                   | g                | 4619220               | nc                            | a                                    | S88                                     | ++++                       | a      | a    | a   | a        | a       | a     | a      | a    | a         | a  | a        | a      | a     | a      | a    | a       | a    | a        | a       | a         | a       | a        | a         |   |
| t                  | 4632763                 | c                    | 4705063                   | c                | 4619591               | s                             | c                                    | UT189                                   | ++++                       | c      | c    | c   | c        | c       | c     | c      | c    | c         | c  | c        | c      | c     | c      | c    | c       | c    | c        | c       | c         | c       | c        | c         |   |
| g                  | 4633784                 | a                    | 4706084                   | a                | 4620612               | ns                            | a                                    | UT189                                   | ++++                       | a      | a    | a   | a        | a       | a     | a      | a    | a         | a  | a        | a      | a     | a      | a    | a       | a    | a        | a       | a         | a       | a        | a         |   |
| t                  | 4634424                 | c                    | 4706724                   | t                | 4621252               | nc                            | t                                    | APEC                                    | ++++                       | t      | t    | t   | t        | t       | t     | t      | t    | t         | t  | t        | t      | t     | t      | t    | t       | t    | t        | t       | t         | t       | t        | t         |   |
| 1                  | 4634670                 | -                    | 4706969                   | -                | 4621497               | ins                           | -                                    | UT189                                   | ++                         | -      | -    | 1   | 1        | 1       | 1     | 1      | 1    | 1         | 1  | 1        | 1      | 1     | 1      | 1    | 1       | 1    | 1        | 1       | 1         | 1       | 1        | 1         |   |
| -                  | 4634685                 | t                    | 4707039                   | c                | 4621567               | nc                            | t                                    | S88                                     | ++                         | t      | t    | t   | t        | t       | t     | t      | t    | t         | t  | t        | t      | t     | t      | t    | t       | t    | t        | t       | t         | t       | t        | t         |   |
| -                  | 4634685                 | g                    | 4718986                   | a                | 4633514               | nc                            | g                                    | S88                                     | ++++                       | g      | g    | g   | g        | g       | g     | g      | g    | g         | g  | g        | g      | g     | g      | g    | g       | g    | g        | g       | g         | g       | g        | g         |   |
| -                  | 4634685                 | t                    | 4721636                   | -                | 4636163               | indel                         | ?                                    | APEC/S88                                | +/-                        | 1      | -    | -   | -        | -       | -     | -      | -    | -         | -  | -        | -      | -     | -      | -    | -       | -    | -        | -       | -         | -       | -        | -         |   |
| -                  | 4634685                 | c                    | 4727253                   | t                | 4641780               | nc                            | t                                    | APEC                                    | ++                         | t      | t    | t   | t        | t       | t     | t      | t    | t         | t  | t        | t      | t     | t      | t    | t       | t    | t        | t       | t         | t       | t        | t         |   |
| -                  | 4634685                 | a                    | 4728234                   | g                | 4642761               | nc                            | g                                    | APEC                                    | ++                         | g      | g    | g   | g        | g       | g     | g      | g    | g         | g  | g        | g      | g     | g      | g    | g       | g    | g        | g       | g         | g       | g        | g         | g |
| -                  | 4634685                 | t                    | 4730261                   | a                | 4644788               | nc                            | a                                    | APEC                                    | ++                         | a      | a    | a   | a        | a       | a     | a      | a    | a         | a  | a        | a      | a     | a      | a    | a       | a    | a        | a       | a         | a       | a        | a         | a |
| -                  | 4634685                 | g                    | 4735685                   | -                | 4650211               | indel                         | ?                                    | APEC/S88                                | +/-                        | -      | g    | -   | -        | -       | -     | -      | -    | -         | -  | -        | -      | -     | -      | -    | -       | -    | -        | -       | -         | -       | -        | -         |   |
| -                  | 4634685                 | c                    | 4742689                   | a                | 4657207               | nc                            | c                                    | S88                                     | ++                         | c      | c    | c   | c        | c       | c     | c      | c    | c         | c  | c        | c      | c     | c      | c    | c       | c    | c        | c       | c         | c       | c        | c         |   |
| -                  | 4634685                 | t                    | 4752085                   | c                | 4666747               | nc                            | t                                    | S88                                     | ++                         | t      | t    | t   | t        | t       | t     | t      | t    | t         | t  | t        | t      | t     | t      | t    | t       | t    | t        | t       | t         | t       | t        | t         |   |
| -                  | 4634685                 | c                    | 4756391                   | t                | 4671053               | nc                            | c                                    | S88                                     | ++                         | c      | c    | c   | c        | c       | c     | c      | c    | c         | c  | c        | c      | c     | c      | c    | c       | c    | c        | c       | c         | c       | c        | c         |   |
| c                  | 4659911                 | t                    | 4795635                   | t                | 4710297               | s                             | c                                    | AS                                      | ++                         | c      | c    | c   | c        | c       | c     | c      | c    | c         | c  | c        | c      | c     | c      | c    | c       | c    | c        | c       | c         | c       | c        | c         |   |
| a                  | 4668288                 | g                    | 4804012                   | g                | 4718674               | ns                            | a                                    | AS                                      | ++                         | a      | a    | g   | g        | g       | g     | g      | g    | g         | g  | g        | g      | g     | g      | g    | g       | g    | g        | g       | g         | g       | g        | g         |   |
| g                  | 4685229                 | t                    | 4820953                   | t                | 4735615               | ns                            | t                                    | UT189                                   | ++++                       | t      | t    | t   | t        | t       | t     | t      | t    | t         | t  | t        | t      | t     | t      | t    | t       | t    | t        | t       | t         | t       | t        | t         |   |
| c                  | 4685567                 | c                    | 4821291                   | t                | 4735953               | ns                            | c                                    | S88                                     | ++++                       | c      | c    | c   | c        | c       | c     | c      | c    | c         | c  | c        | c      | c     | c      | c    | c       | c    | c        | c       | c         | c       | c        | c         |   |
| c                  | 4688115                 | c                    | 4823839                   | t                | 4738501               | nc                            | c                                    | S88                                     | ++++                       | c      | c    | c   | c        | c       | c     | c      | c    | c         | c  | c        | c      | c     | c      | c    | c       | c    | c        | c       | c         | c       | c        | c         |   |
| c                  | 4693391                 | a                    | 4829115                   | c                | 4743777               | s                             | c                                    | APEC                                    | ++++                       | c      | c    | c   | c        | c       | c     | c      | c    | c         | c  | c        | c      | c     | c      | c    | c       | c    | c        | c       | c         | c       | c        | c         | c |
| c                  | 4695091                 | t                    | 4830815                   | t                | 4745477               | ns                            | c                                    | AS                                      | ++++                       | c      | c    | c   | c        | c       | c     | c      | c    | c         | c  | c        | c      | c     | c      | c    | c       | c    | c        | c       | c         | c       | c        | c         |   |
| c                  | 4712240                 | t                    | 4847187                   | -                | 4752209               | s                             | c                                    | APEC                                    | ++++                       | c      | c    | c   | c        | c       | c     | c      | c    | c         | c  | c        | c      | c     | c      | c    | c       | c    | c        | c       | c         | c       | c        | c         | c |
| c                  | 4724285                 | a                    | 4859232                   | -                | 4752209               | ns                            | a                                    | UT189                                   | ++++                       | a      | a    | a   | a        | a       | a     | a      | a    | a         | a  | a        | a      | a     | a      | a    | a       | a    | a        | a       | a         | a       | a        | a         | a |
| a                  | 4731087                 | t                    | 4866034                   | -                | 4752209               |                               |                                      |                                         |                            |        |      |     |          |         |       |        |      |           |    |          |        |       |        |      |         |      |          |         |           |         |          |           |   |

| ExPEC Cluster      |                         |                      |                           |                  |                       |                   |                                      |                                         |                            | Outgroup Strains <sup>g</sup> |      |     |          |         |       |        |      |           |    |          |        |       |        |      |         |      |          |         |           |         |          |           |   |
|--------------------|-------------------------|----------------------|---------------------------|------------------|-----------------------|-------------------|--------------------------------------|-----------------------------------------|----------------------------|-------------------------------|------|-----|----------|---------|-------|--------|------|-----------|----|----------|--------|-------|--------|------|---------|------|----------|---------|-----------|---------|----------|-----------|---|
| UTI89 <sup>a</sup> | UTI89 site <sup>b</sup> | APEC 01 <sup>a</sup> | APEC 01 site <sup>b</sup> | S88 <sup>a</sup> | S88 site <sup>b</sup> | type <sup>c</sup> | Inferred ancestral base <sup>d</sup> | Lineage inferred to mutate <sup>e</sup> | Support level <sup>f</sup> | CFT073                        | ED1a | 536 | E2348/69 | SMS 3-5 | IAI39 | UMN026 | K-12 | ATCC 8739 | HS | D1 Sd197 | CB9615 | Sakai | EDL933 | IAI1 | E24377A | SE11 | SS Ss046 | F2a 301 | F2a 2457T | F5 8401 | B4 Sd227 | B18 BS512 |   |
| g                  | 4913801                 | t                    | 4930030                   | t                | 4891877               | ns                | t                                    | UTI89                                   | ++++                       | t                             | t    | t   | t        | t       | t     | t      | t    | t         | t  | t        | t      | t     | t      | t    | t       | t    | t        | t       | t         | t       | t        | t         |   |
| c                  | 4919522                 | t                    | 4935751                   | t                | 4899954               | s                 | t                                    | UTI89                                   | ++++                       | t                             |      | t   | t        | t       | t     | t      | t    | t         | t  |          | t      | t     | t      | t    | t       | t    | t        | t       | t         | t       | t        | t         |   |
| c                  | 4945745                 | t                    | 4961974                   | c                | 4911459               | s                 | c                                    | APEC                                    | ++++                       | c                             |      | c   | c        | c       | c     | c      | c    | c         | c  | c        | c      | c     | c      | c    | c       | c    | c        |         |           |         |          | c         | c |
| c                  | 4949832                 | a                    | 4966061                   | c                | 4918134               | s                 | c                                    | APEC                                    | ++++                       | c                             | c    | c   | c        | c       | c     | c      | c    | c         | c  | c        | c      | c     | c      | c    | c       | c    | c        |         |           |         |          | c         | c |
| t                  | 4974091                 | g                    | 4990320                   | t                | 4940268               | ns                | t                                    | APEC                                    | ++++                       | t                             | t    | t   | t        | t       | t     | t      | t    | t         | t  | t        | t      | t     | t      | t    | t       | t    | t        | t       | t         | t       | t        | t         |   |
| c                  | 4974109                 | t                    | 4990338                   | c                | 4940286               | s                 | c                                    | APEC                                    | ++++                       | c                             | c    | c   | c        | c       | t     | c      | c    | c         | c  | c        | c      | c     | c      | c    | c       | c    | c        | c       | c         | c       | c        | c         | c |
| a                  | 4976994                 | g                    | 4993223                   | g                | 4943169               | s                 | a                                    | AS                                      | ++                         | a                             | a    | a   | a        | a       | g     | a      | a    | g         | g  | g        | g      | g     | g      | g    | g       | g    | g        | g       | g         | g       | g        | g         | g |
| a                  | 4983543                 | g                    | 4999772                   | g                | 4949716               | s                 | a                                    | AS                                      | ++                         | a                             | a    | a   | a        | a       | a     | a      | a    | g         | g  | g        | g      | g     | g      | g    | g       | g    | g        | g       | g         | g       | g        | g         | a |
| a                  | 4983865                 | g                    | 5000094                   | a                | 4950038               | nc                | a                                    | APEC                                    | ++++                       | a                             | a    | a   | a        | a       | a     | a      | a    | a         | a  | a        | a      | a     | a      | a    | a       | a    | a        | a       | a         | a       | a        | a         | a |
| t                  | 4986069                 | g                    | 5002299                   | g                | 4952310               | s                 | g                                    | UTI89                                   | ++++                       | g                             | g    | g   | g        | g       | g     | g      | g    | g         | g  | g        | g      | g     | g      | g    | g       | g    | g        | g       | g         | g       | g        | g         | g |
| g                  | 4988688                 | a                    | 5004918                   | a                | 4954929               | nc                | ?                                    | UTI89/AS                                | +/-                        |                               |      |     |          |         |       |        |      |           |    |          |        |       |        |      |         |      |          |         |           |         |          |           |   |
| a                  | 4988713                 | g                    | 5004943                   | g                | 4954954               | nc                | ?                                    | UTI89/AS                                | +/-                        |                               |      |     |          |         |       |        |      |           |    |          |        |       |        |      |         |      |          |         |           |         |          |           |   |
| c                  | 4989741                 | t                    | 5005971                   | c                | 4955982               | ns                | ?                                    | APEC                                    | +/-                        |                               |      |     |          |         |       |        |      |           |    |          |        |       |        |      |         |      |          |         |           |         |          |           |   |
| g                  | 4989979                 | a                    | 5006209                   | a                | 4956220               | s                 | ?                                    | UTI89/AS                                | +/-                        |                               |      |     |          |         |       |        |      |           |    |          |        |       |        |      |         |      |          |         |           |         |          |           |   |
| c                  | 4990632                 | t                    | 5006862                   | t                | 4956873               | ns                | c                                    | AS                                      | ++                         |                               |      |     |          |         |       |        |      |           |    |          | c      |       |        |      |         |      |          |         |           |         |          |           |   |
| a                  | 4992238                 | g                    | 5007574                   | g                | 4957585               | ns                | g                                    | UTI89                                   | ++++                       |                               |      |     |          |         |       |        | g    |           |    |          | g      |       |        |      |         |      | g        |         |           |         |          |           |   |
| g                  | 4996702                 | a                    | 5012038                   | a                | 4962049               | s                 | g                                    | AS                                      | ++                         |                               | g    |     |          |         | g     | a      |      |           |    |          |        |       |        |      |         |      |          |         |           |         |          |           |   |
| g                  | 5001290                 | g                    | 5015977                   | t                | 4965987               | s                 | g                                    | S88                                     | ++                         | g                             | g    |     |          |         | t     | g      |      |           |    |          | g      |       |        |      |         |      |          |         |           |         | t        | t         |   |
| a                  | 5009646                 | g                    | 5026944                   | a                | 4976954               | ns                | a                                    | APEC                                    | +                          |                               |      |     | a        |         | a     | a      |      |           |    |          | a      | a     | a      |      |         |      |          |         |           |         |          |           |   |
| g                  | 5024687                 | g                    | 5041982                   | a                | 4991992               | s                 | g                                    | S88                                     | ++                         | g                             | g    |     | g        | g       | g     | g      |      | g         | g  | g        | g      | g     | g      | g    |         | g    | a        | a       | a         | a       | a        | g         |   |
| g                  | 5037621                 | a                    | 5053886                   | g                | 5003896               | s                 | g                                    | APEC                                    | ++++                       | g                             | g    | g   | g        | g       | g     | g      | g    | g         | g  | g        | g      | g     | g      | g    | g       | g    | g        | g       | g         | g       | g        | g         | g |
| c                  | 5040452                 | t                    | 5056717                   | c                | 5006930               | s                 | c                                    | APEC                                    | ++++                       | c                             | c    | c   | c        | c       | c     | c      | c    | c         | c  | c        | c      | c     | c      | c    | c       | c    | c        | c       | c         | c       | c        | c         | c |
| c                  | 5051251                 | t                    | 5067516                   | c                | 5017778               | s                 | c                                    | APEC                                    | ++++                       | c                             | c    | c   | c        | c       | c     | c      | c    | c         | c  | c        | c      | c     | c      | c    | c       | c    | c        | c       | c         | c       | c        | c         | c |
| g                  | 5051312                 | g                    | 5067577                   | t                | 5017839               | ns                | g                                    | S88                                     | ++++                       | g                             | g    | g   | g        | g       | g     | g      | g    | g         | g  | g        | g      | g     | g      | g    | g       | g    | g        | g       | g         | g       | g        | g         | g |

<sup>a</sup>Numbers in place of bases indicates number of bases where >2 bases inserted or deleted. In these cases "-" indicates absence of these bases.

<sup>b</sup>For indels the base indicated is the base before the insertion or deletion in the strain.

<sup>c</sup>s: synonymous; ns: non-synonymous; nc: in non-coding gene; i: intergenic; ins: small insert; del: small deletion; indel: the small indels that can't be allocated

<sup>d</sup>The base in the common ancestor of the 3 ExPEC strains as inferred from outgroup analysis.

<sup>e</sup>AS: allocated to the lineage to the common ancestor of APEC 01 and S88; UTI89/AS: allocated to the divergence between UTI89 and the common ancestor of APEC 01 and S88 (strain not specified); APEC/S88: allocated to the divergence between APEC 01 and S88 lineages (lineage not specified)..

<sup>f</sup>Level of support for allocation of mutation as given in previous column

++++ agreement is high - 8 or more outgroup strains with expected base and at most 1 with an alternative base, and at least 2 of the CFT073, ED1a and 536 support the expected base)

+++ agreement good - 4 or more outgroup strains with expected base and at most 1 with an alternative base, and at least 2 of the CFT073, ED1a and 536 support the expected base)

++ supported by at least 2 of the CFT073, ED1a and 536 regardless of situation with other outgroup strains

+ no conflict but very limited support as either site absent or conflict in all of CFT073, ED1a and 536, or conflict among them, and/or support is less than required for any of the higher levels of support.

+/- no conflict but no support (base not present in any outgroup OR base when present is not that in any of the ExEPEC strains OR both alternative lineages supported equally).

- conflict data implies 2 mutations at that site - eg in the ancestor of 3 ExEPEC strains before isolation and again in one of the lineages.

<sup>g</sup>Base, number or "-" indicates the base type or absence of the base. Blank means the site not present.
