# Supplementary material for: Derivation of Escherichia coli O157:H7 from Its O55:H7 Precursor
Source: PLoS One. 2010 Jan 14;5(1):e8700. doi: 10.1371/journal.pone.0008700 (PMC2806823; doi:10.1371/journal.pone.0008700)
Supplement: Table S8 — Virtual outgroup analysis for allocation of recombinant regions to the UTI189, S88, or APEC 01 lineages. The 23 genomes used for the analysis are shown, with details of the base or bases present in both outgroup genomes and genomes under analysis, and also the final allocation and a measure of support level for that allocation. (0.32 MB PDF) [file pone.0008700.s010.pdf]

Table S8. Allocation of recombinational SNPs to lineages by virtual outgroup analysis<sup>a</sup>

| ExPEC genome site details |                         |                      |                           |                  |                       |                   |                              |                     |                                      | Outgroup Strains Details <sup>1</sup> |                            |        |      |     |          |         |      |        |      |           |    |          |        |       |        |     |         |      |          |         |           |         |          |           |   |   |
|---------------------------|-------------------------|----------------------|---------------------------|------------------|-----------------------|-------------------|------------------------------|---------------------|--------------------------------------|---------------------------------------|----------------------------|--------|------|-----|----------|---------|------|--------|------|-----------|----|----------|--------|-------|--------|-----|---------|------|----------|---------|-----------|---------|----------|-----------|---|---|
| UT189 <sup>b</sup>        | UT189 site <sup>c</sup> | APEC 01 <sup>b</sup> | APEC 01 site <sup>c</sup> | S88 <sup>b</sup> | S88 site <sup>c</sup> | type <sup>d</sup> | Event Lineage <sup>e,f</sup> | Recombinant segment | Inferred ancestral base <sup>g</sup> | Outgroup Analysis <sup>g</sup>        | Support level <sup>h</sup> | CFT073 | ED1a | 536 | E2348/69 | SMS 3-5 | IA39 | UMN026 | K-12 | ATCC 8739 | HS | D1 Sd197 | CB9615 | Sakai | EDL933 | IA1 | E24377A | SE11 | SS Sd046 | F2a 301 | F2a 2457T | F5 8401 | B4 Sd227 | B18 BS512 |   |   |
| a                         | 221635                  | a                    | 221611                    | c                | 221634                | ns                | S88                          | rec1                | a                                    | S88                                   | ++++                       | a      | a    | a   | a        | a       | a    | a      | a    | a         | a  | a        | a      | a     | a      | a   | a       | a    | a        | a       | a         | a       | a        | a         |   |   |
| t                         | 221636                  | t                    | 221612                    | a                | 221635                | s                 | S88                          | rec1                | t                                    | S88                                   | ++++                       | t      | t    | t   | t        | t       | t    | t      | t    | t         | t  | t        | t      | t     | t      | t   | t       | t    | t        | t       | t         | t       | t        | t         |   |   |
| g                         | 229525                  | a                    | 229501                    | g                | 229524                | nc                | APEC                         | rec2                | g                                    | APEC                                  | ++                         | a      | g    | g   | g        | g       | a    | g      | a    | g         | g  | a        | a      | a     | g      | g   | g       | g    | g        | g       | g         | g       | g        | g         | g |   |
| g                         | 229529                  | c                    | 229505                    | g                | 229528                | nc                | APEC                         | rec2                | g                                    | APEC                                  | ++                         | c      | g    | g   | g        | g       | c    | g      | c    | g         | c  | c        | c      | c     | c      | c   | c       | c    | c        | c       | c         | c       | c        | c         | c |   |
| t                         | 229533                  | c                    | 229509                    | t                | 229532                | nc                | APEC                         | rec2                | t                                    | APEC                                  | ++                         | c      | t    | t   | t        | c       | t    | c      | t    | c         | t  | t        | g      | c     | c      | c   | t       | t    | c        | t       | t         | t       | t        | t         | t |   |
| a                         | 229542                  | g                    | 229518                    | a                | 229541                | nc                | APEC                         | rec2                | a                                    | APEC                                  | ++++                       | -      | a    | a   | a        | a       | -    | a      | -    | a         | -  | a        | c      | -     | -      | -   | a       | a    | a        | -       | a         | a       | a        | a         | a |   |
| g                         | 229543                  | a                    | 229519                    | g                | 229542                | nc                | APEC                         | rec2                | g                                    | APEC                                  | ++++                       | g      | g    | g   | g        | g       | g    | g      | g    | g         | g  | g        | g      | g     | g      | g   | g       | g    | g        | g       | g         | g       | g        | g         | g |   |
| a                         | 229544                  | t                    | 229520                    | a                | 229543                | nc                | APEC                         | rec2                | a                                    | APEC                                  | ++++                       | a      | a    | a   | a        | a       | a    | a      | a    | a         | a  | a        | a      | a     | a      | a   | a       | a    | a        | a       | a         | a       | a        | a         | a |   |
| a                         | 229545                  | t                    | 229521                    | a                | 229544                | nc                | APEC                         | rec2                | a                                    | APEC                                  | ++                         | t      | a    | a   | a        | a       | a    | t      | a    | t         | a  | a        | g      | t     | t      | a   | a       | a    | a        | a       | a         | a       | a        | a         | a | a |
| t                         | 229546                  | g                    | 229522                    | t                | 229545                | nc                | APEC                         | rec2                | t                                    | APEC                                  | ++++                       | t      | t    | t   | t        | t       | t    | t      | t    | t         | t  | g        | t      | t     | t      | t   | t       | t    | t        | t       | t         | t       | t        | t         | t |   |
| c                         | 229561                  | t                    | 229537                    | c                | 229560                | nc                | APEC                         | rec2                | c                                    | APEC                                  | ++                         | t      | c    | c   | c        | c       | c    | c      | c    | c         | c  | c        | t      | t     | t      | c   | c       | c    | c        | c       | c         | c       | c        | c         | c |   |
| a                         | 230086                  | c                    | 230062                    | a                | 230085                | nc                | APEC                         | rec2                | c                                    | 2                                     | -                          | c      | a    | c   | a        | c       | c    | c      | c    | c         | a  | t        | c      | c     | c      | t   | c       | t    | c        | t       | t         | t       | t        | c         | c |   |
| g                         | 230585                  | a                    | 230556                    | g                | 230584                | nc                | APEC                         | rec2                | a                                    | 2                                     | -                          | a      | g    | a   | g        | a       | a    | a      | a    | a         | a  | a        | a      | a     | a      | a   | a       | a    | a        | a       | a         | a       | a        | a         | a |   |
| a                         | 230858                  | g                    | 230829                    | a                | 230857                | ns                | APEC                         | rec2                | g                                    | 2                                     | -                          | g      | a    | g   | a        | a       | g    | a      | g    | a         | g  | a        | g      | a     | a      | a   | g       | a    | g        | a       | a         | a       | a        | a         | a |   |
| t                         | 230859                  | c                    | 230830                    | t                | 230858                | ns                | APEC                         | rec2                | c                                    | 2                                     | -                          | c      | c    | c   | t        | c       | c    | c      | c    | t         | c  | t        | c      | c     | c      | t   | c       | c    | c        | c       | c         | c       | c        | c         | t |   |
| c                         | 231043                  | a                    | 231014                    | c                | 231042                | nc                | APEC                         | rec2                | c                                    | APEC                                  | ++                         | a      | c    | c   | c        | c       | c    | c      | a    | c         | c  | c        | c      | c     | c      | c   | c       | c    | c        | c       | c         | c       | c        | c         | c |   |
| c                         | 231045                  | g                    | 231016                    | c                | 231044                | nc                | APEC                         | rec2                | c                                    | APEC                                  | ++                         | g      | c    | c   | c        | c       | c    | c      | c    | c         | c  | c        | c      | c     | c      | c   | c       | c    | c        | c       | c         | c       | c        | c         | c |   |
| t                         | 231046                  | c                    | 231017                    | t                | 231045                | nc                | APEC                         | rec2                | t                                    | APEC                                  | ++                         | c      | t    | t   | t        | t       | t    | t      | t    | t         | t  | t        | t      | t     | t      | t   | t       | t    | t        | t       | t         | t       | t        | t         | t |   |
| t                         | 231050                  | g                    | 231021                    | t                | 231049                | nc                | APEC                         | rec2                | t                                    | APEC                                  | ++                         | g      | t    | t   | t        | t       | g    | g      | g    | g         | g  | g        | t      | t     | t      | g   | g       | g    | g        | g       | g         | g       | g        | g         | g |   |
| g                         | 231052                  | c                    | 231023                    | g                | 231051                | nc                | APEC                         | rec2                | g                                    | APEC                                  | ++                         | c      | g    | g   | g        | g       | g    | g      | g    | g         | g  | g        | g      | g     | g      | g   | g       | g    | g        | g       | g         | g       | g        | g         | g |   |
| -                         | 231053                  | t                    | 231025                    | -                | 231052                | ins               | APEC                         | rec2                | -                                    | APEC                                  | ++                         | 1      | -    | -   | -        | -       | -    | -      | 1    | -         | 1  | -        | 1      | 1     | 1      | 1   | 1       | 1    | 1        | 1       | 1         | 1       | 1        | 1         | 1 |   |
| t                         | 231347                  | c                    | 231319                    | t                | 231346                | nc                | APEC                         | rec2                | t                                    | APEC                                  | ++                         | c      | t    | t   | t        | t       | c    | c      | t    | t         | c  | t        | t      | t     | t      | t   | t       | t    | t        | t       | t         | t       | t        | t         | t |   |
| a                         | 231672                  | g                    | 231644                    | a                | 231671                | nc                | APEC                         | rec2                | a                                    | APEC                                  | ++                         | g      | a    | a   | a        | a       | a    | g      | a    | a         | a  | a        | a      | a     | a      | a   | a       | g    | a        | g       | g         | g       | g        | g         | a |   |
| -                         | 231674                  | t                    | 231647                    | -                | 231673                | ins               | APEC                         | rec2                | -                                    | APEC                                  | ++                         | 1      | -    | -   | -        | -       | 1    | 1      | -    | -         | -  | -        | -      | -     | -      | 1   | 1       | -    | 1        | 1       | 1         | 1       | 1        | 1         | - |   |
| t                         | 231678                  | c                    | 231651                    | t                | 231677                | nc                | APEC                         | rec2                | t                                    | APEC                                  | ++                         | c      | t    | t   | t        | t       | c    | c      | t    | t         | t  | t        | t      | t     | c      | c   | t       | c    | c        | c       | c         | c       | c        | c         | c |   |
| g                         | 231719                  | t                    | 231692                    | g                | 231718                | nc                | APEC                         | rec2                | g                                    | APEC                                  | ++                         | t      | g    | g   | g        | t       | t    | t      | t    | t         | t  | t        | t      | t     | t      | t   | t       | t    | t        | t       | t         | t       | t        | t         | t |   |
| c                         | 231720                  | a                    | 231693                    | c                | 231719                | nc                | APEC                         | rec2                | c                                    | APEC                                  | ++                         | a      | c    | c   | c        | g       | a    | a      | a    | a         | g  | a        | g      | a     | a      | g   | a       | g    | a        | g       | g         | g       | g        | g         | a |   |
| g                         | 231729                  | t                    | 231702                    | g                | 231728                | nc                | APEC                         | rec2                | g                                    | APEC                                  | ++                         | t      | g    | g   | g        | c       | t    | t      | t    | c         | t  | c        | t      | c     | t      | c   | c       | t    | c        | t       | c         | t       | t        | t         | t |   |
| t                         | 231730                  | a                    | 231703                    | t                | 231729                | nc                | APEC                         | rec2                | t                                    | APEC                                  | ++                         | a      | t    | t   | c        | t       | a    | a      | a    | a         | a  | a        | a      | a     | a      | a   | a       | a    | a        | a       | a         | a       | a        | a         | a |   |
| c                         | 232006                  | t                    | 231979                    | c                | 232005                | nc                | APEC                         | rec2                | c                                    | APEC                                  | ++                         | t      | c    | c   | c        | t       | t    | t      | t    | t         | t  | t        | t      | t     | t      | t   | t       | t    | t        | t       | t         | t       | t        | t         | c |   |
| g                         | 232048                  | a                    | 232021                    | g                | 232047                | nc                | APEC                         | rec2                | g                                    | APEC                                  | ++                         | a      | g    | g   | g        | a       | a    | a      | a    | a         | a  | a        | a      | a     | a      | a   | a       | a    | a        | a       | a         | a       | a        | a         | a |   |
| 2                         | 232370                  | -                    | 232342                    | 2                | 232369                | del               | APEC                         | rec2                | 2                                    | APEC                                  | ++                         | -      | 2    | 2   | 2        | 2       | 2    | 2      | -    | -         | -  | -        | -      | -     | -      | -   | -       | -    | -        | -       | -         | -       | -        | -         | - |   |
| a                         | 232372                  | c                    | 232343                    | a                | 232371                | nc                | APEC                         | rec2                | a                                    | APEC                                  | ++                         | a      | a    | a   | a        | a       | a    | c      | c    | c         | c  | c        | c      | c     | c      | c   | c       | c    | c        | c       | c         | c       | c        | c         | c |   |
| c                         | 232374                  | a                    | 232345                    | c                | 232373                | nc                | APEC                         | rec2                | c                                    | APEC                                  | ++                         | -      | c    | c   | c        | c       | c    | a      | a    | a         | a  | a        | a      | a     | a      | a   | a       | a    | a        | a       | a         | a       | a        | a         | a |   |
| g                         | 232707                  | a                    | 232678                    | g                | 232706                | nc                | APEC                         | rec2                | g                                    | APEC                                  | ++                         | a      | g    | g   | g        | g       | g    | a      | a    | a         | a  | a        | a      | a     | a      | a   | a       | a    | a        | a       | a         | a       | a        | a         | a |   |
| -                         | 232741                  | 1                    | 232713                    | -                | 232740                | ins               | APEC                         | rec2                | -                                    | APEC                                  | ++++                       | -      | -    | -   | -        | -       | -    | -      | -    | -         | -  | -        | -      | -     | -      | -   | -       | -    | -        | -       | -         | -       | -        | -         | - |   |
| -                         | 232747                  | 1                    | 232720                    | -                | 232746                | ins               | APEC                         | rec2                | -                                    | APEC                                  | ++++                       | -      | -    | -   | -        | -       | -    | -      | -    | -         | -  | -        | -      | -     | -      | -   | -       | -    | -        | -       | -         | -       | -        | -         | - |   |
| g                         | 232758                  | t                    | 232731                    | g                | 232757                | nc                | APEC                         | rec2                | g                                    | APEC                                  | ++++                       | g      | g    | g   | g        | g       | g    | g      | g    | g         | g  | g        | g      | g     | g      | g   | g       | g    | g        | g       | g         | g       | g        | g         | g |   |
| c                         | 232760                  | t                    | 232733                    | c                | 232759                | nc                | APEC                         | rec2                | c                                    | APEC                                  | ++++                       | c      | c    | c   | c        | c       | c    | c      | c    | c         | c  | c        | c      | c     | c      | c   | c       | c    | c        | c       | c         | c       | c        | c         | c |   |
| -                         | 232767                  | 1                    | 232741                    | -                | 232766                | ins               | APEC                         | rec2                | -                                    | APEC                                  | ++++                       | -      | -    | -   | -        | -       | -    | -      | -    | -         | -  | -        | -      | -     | -      | -   | -       | -    | -        | -       | -         | -       | -        | -         | - |   |
| a                         | 232786                  | c                    | 232760                    | a                | 232785                | nc                | APEC                         | rec2                | a                                    | APEC                                  | ++++                       | a      | a    | a   | a        | a       | a    | a      | a    | a         | a  | a        | a      | a     | a      | a   | a       | a    | a        | a       | a         | a       | a        | a         | a |   |
| a                         | 232800                  | g                    | 232774                    | a                | 232799                | nc                | APEC                         | rec2                | a                                    | APEC                                  | ++++                       | a      | a    | a   | a        | a       | a    | a      | a    | a         | a  | a        | a      | a     | a      | a   | a       | a    | a        | a       | a         | a       | a        | a         | a |   |
| c                         | 232802                  | g                    | 232776                    | c                | 232801                | nc                | APEC                         | rec2                | c                                    | APEC                                  | ++++                       | c      | c    | c   | c        | c       | c    | c      | c    | c         | c  | c        | c      | c     | c      | c   | c       | c    | c        | c       | c         | c       | c        | c         | c |   |
| -                         | 232802                  | 1                    | 232777                    | -                | 232801                | ins               | APEC                         | rec2                | -                                    | APEC                                  | ++++                       | -      | -    | -   | -        | -       | -    | -      | -    | -         | -  | -        | -      | -     | -      | -   | -       | -    | -        | -       | -         | -       | -        | -         | - |   |
| g                         | 232805                  | t                    | 232780                    | g                | 232804                | nc                | APEC                         | rec2                | g                                    | APEC                                  | ++++                       | g      | g    | g   | g        | g       | g    | g      | g    | g         | g  | g        | g      | g     | g      | g   | g       | g    | g        | g       | g         | g       | g        | g         | g |   |
| c                         | 241883                  | g                    | 241861                    | c                | 241882                | nc                | APEC                         | rec2                | c                                    | APEC                                  | ++++                       | c      | c    | c   | c        | c       | c    | c      | c    | c         | c  | c        | c      | c     | c      | c   | c       | c    | c        | c       | c         | c       | c        | c         | c |   |
| a                         | 241885                  | t                    | 241863                    | a                | 241884                | nc                | APEC                         | rec2                | a                                    | APEC                                  | ++                         | a      | a    | a   | a        | a       | a    | a      | a    | a         | a  | a        | a      | a     | a      | a   | a       | a    | a        | a       | a         | a       | a        | a         | a |   |
| c                         | 241886                  | t                    | 241864                    | c                | 241885                | nc                | APEC                         | rec2                | c                                    | APEC                                  | ++++                       | c      | c    | c   | c        | c       | c    | c      | c    | c         | c  | c        | c      | c     | c      | c   | c       | c    | c        | c       | c         | c       | c        | c         | c |   |
| a                         | 569110                  | a                    | 570708                    | c                | 558494                | nc                | S88                          | rec3                | a                                    | S88                                   | ++                         | a      | a    | a   | a        | c       | c    | c      |      |           |    |          |        |       |        |     |         |      |          |         |           |         |          |           |   |   |
| t                         | 569137                  | t                    | 570735                    | a                | 558521                | ns                | S88                          | rec3                | t                                    | S88                                   | ++                         | t      | t    | t   | t        | a       | a    | a      |      |           |    |          |        |       |        |     |         |      |          |         |           |         |          |           |   |   |
| t                         | 569140                  | t                    | 570738                    | c                | 558524                | ns                | S88                          | rec3                | t                                    | S88                                   | ++                         | t      | t    | t   | t        | c       | c    | c      |      |           |    |          |        |       |        |     |         |      |          |         |           |         |          |           |   |   |
| t                         | 569143                  | t                    | 570741                    | c                | 558527                | ns                | S88                          | rec3                | t                                    | S88                                   | ++                         | t      | t    | t   | t        | c       | c    | c      |      |           |    |          |        |       |        |     |         |      |          |         |           |         |          |           |   |   |
| g                         | 569153                  | g                    | 570751                    | c                | 558537                | ns                | S88                          | rec3                | g                                    | S88                                   | ++++                       | g      | g    | g   | g        | c       | g    | g      |      |           |    |          |        |       |        |     |         |      |          |         |           |         |          |           |   |   |
| t                         | 1267541                 | t                    | 1204836                   | c                | 1208449               | s                 | S88                          | rec4                | c                                    | 2                                     | -                          | t      | c    | c   | c        | c       | c    |        |      |           |    |          |        |       |        |     |         |      |          |         |           |         |          |           |   |   |
| t                         | 1268200                 | t                    | 1205495                   | a                | 1209108               | ns                | S88                          | rec4                | a                                    | 2                                     | -                          | t      | a    | a   | a        | a       |      |        |      |           |    |          |        |       |        |     |         |      |          |         |           |         |          |           |   |   |

Table S8. Allocation of recombinational SNPs to lineages by virtual outgroup analysis<sup>a</sup>

| ExPEC genome site details |                         |                      |                           |                  |                       |                   |                             |                     |                                      | Outgroup Strains Details <sup>1</sup> |                            |        |      |     |          |         |      |        |      |           |    |          |        |       |        |     |         |      |          |         |           |         |          |           |
|---------------------------|-------------------------|----------------------|---------------------------|------------------|-----------------------|-------------------|-----------------------------|---------------------|--------------------------------------|---------------------------------------|----------------------------|--------|------|-----|----------|---------|------|--------|------|-----------|----|----------|--------|-------|--------|-----|---------|------|----------|---------|-----------|---------|----------|-----------|
| UT189 <sup>b</sup>        | UTI89 site <sup>c</sup> | APEC 01 <sup>b</sup> | APEC 01 site <sup>c</sup> | S88 <sup>b</sup> | S88 site <sup>c</sup> | type <sup>d</sup> | Event Lineage <sup>ef</sup> | Recombinant segment | Inferred ancestral base <sup>g</sup> | Outgroup Analysis <sup>e</sup>        | Support level <sup>h</sup> | CFT073 | ED1a | 536 | E2348/69 | SMS 3-5 | IA39 | UMN026 | K-12 | ATCC 8739 | HS | D1 Sd197 | CB9615 | Sakai | EDL933 | IA1 | E24377A | SE11 | SS Sd046 | F2a 301 | F2a 2457T | F5 8401 | B4 Sb227 | B18 BS512 |
| c                         | 1270440                 | c                    | 1207735                   | a                | 1211348               | ns                | S88                         | rec4                | c                                    | S88                                   | ++                         | c      | c    | g   | c        |         | g    | g      |      | g         |    | a        | c      | c     | a      |     | a       | a    |          |         |           |         | c        |           |
| t                         | 1270441                 | g                    | 1207736                   | c                | 1211349               | ns                | S88                         | rec4                | t                                    | S88                                   | ++                         | t      | t    | t   | t        |         | t    | t      |      | t         |    | a        | c      | c     | a      |     | a       | a    |          |         |           |         | t        |           |
| g                         | 1270442                 | g                    | 1207737                   | a                | 1211350               | ns                | S88                         | rec4                | g                                    | S88                                   | ++                         | g      | g    | a   | t        |         | a    | a      |      | a         |    | a        | g      | g     | a      |     | a       | a    |          |         |           |         | t        |           |
| g                         | 1270443                 | c                    | 1207738                   | a                | 1211351               | ns                | S88                         | rec4                | g                                    | S88                                   | ++                         | g      | g    | a   | g        |         | a    | a      |      | a         |    | a        | g      | g     | a      |     | a       | a    |          |         |           |         | g        |           |
| c                         | 1270444                 | c                    | 1207739                   | t                | 1211352               | ns                | S88                         | rec4                | c                                    | S88                                   | +                          | c      | a    | t   | a        |         | t    | t      |      | t         |    | t        | c      | c     | t      |     | t       | t    |          |         |           |         | a        |           |
| a                         | 1270445                 | a                    | 1207740                   | g                | 1211353               | ns                | S88                         | rec4                | g                                    | 2                                     | -                          | a      | g    | g   | g        |         | g    | g      |      | g         |    | g        | a      | a     | g      |     | g       | g    |          |         |           |         | g        |           |
| g                         | 1270457                 | g                    | 1207752                   | t                | 1211365               | s                 | S88                         | rec4                | t                                    | 2                                     | -                          | g      | t    | t   | t        |         | t    | g      |      | g         |    | t        | g      | g     | t      |     | t       | t    |          |         |           |         | t        |           |
| c                         | 1270484                 | c                    | 1207779                   | g                | 1211392               | ns                | S88                         | rec4                | c                                    | S88                                   | ++                         | c      | c    | c   | c        |         | g    | g      |      | g         |    | g        | c      | c     | g      |     | g       | g    |          |         |           |         | c        |           |
| g                         | 1270489                 | g                    | 1207784                   | a                | 1211397               | ns                | S88                         | rec4                | g                                    | S88                                   | ++                         | g      | a    | g   | a        |         | a    | g      |      | a         |    | a        | a      | a     | a      |     | g       | g    |          |         |           |         | a        |           |
| c                         | 1270493                 | c                    | 1207788                   | t                | 1211401               | s                 | S88                         | rec4                | c                                    | S88                                   | ++                         | c      | t    | c   | t        |         | t    | t      |      | t         |    | t        | c      | c     | t      |     | t       | t    |          |         |           |         | t        |           |
| a                         | 1270505                 | a                    | 1207800                   | g                | 1211413               | s                 | S88                         | rec4                | a                                    | S88                                   | ++                         | a      | a    | g   | a        |         | g    | g      |      | g         |    | g        | a      | a     | g      |     | g       | g    |          |         |           |         | a        |           |
| a                         | 1270521                 | a                    | 1207816                   | g                | 1211429               | ns                | S88                         | rec4                | g                                    | 2                                     | -                          | a      | g    | g   | g        |         | g    | g      |      | g         |    | g        | a      | a     | g      |     | g       | g    |          |         |           |         | g        |           |
| c                         | 1270522                 | a                    | 1207817                   | t                | 1211430               | ns                | S88                         | rec4                | a                                    | S88                                   | ++                         | a      | a    | t   | a        |         | t    | t      |      | t         |    | t        | a      | a     | t      |     | t       | t    |          |         |           |         | a        |           |
| a                         | 1270545                 | a                    | 1207840                   | g                | 1211453               | ns                | S88                         | rec4                | g                                    | 2                                     | -                          | g      | g    | g   | g        |         | g    | g      |      | g         |    | g        | g      | g     | g      |     | g       | g    |          |         |           |         | g        |           |
| t                         | 1270595                 | t                    | 1207890                   | c                | 1211503               | s                 | S88                         | rec4                | t                                    | S88                                   | ++                         | t      | c    | t   | c        |         | c    | c      |      | c         |    | c        | t      | t     | c      |     | c       | c    |          |         |           |         | c        |           |
| c                         | 1270625                 | c                    | 1207920                   | t                | 1211533               | s                 | S88                         | rec4                | c                                    | S88                                   | ++                         | c      | c    | c   | t        |         | t    | t      |      | t         |    | t        | c      | c     | t      |     | t       | t    |          |         |           |         | c        |           |
| c                         | 1270649                 | c                    | 1207944                   | a                | 1211557               | s                 | S88                         | rec4                | c                                    | S88                                   | ++                         | c      | t    | t   | t        |         | t    | t      |      | t         |    | t        | c      | c     | t      |     | t       | t    |          |         |           |         | t        |           |
| g                         | 1270808                 | g                    | 1208103                   | a                | 1211716               | s                 | S88                         | rec4                | g                                    | S88                                   | +++                        | g      | g    | g   | g        |         | g    | g      |      | g         |    | a        | g      | g     | g      |     | g       | g    |          |         |           |         | g        |           |
| t                         | 1270838                 | t                    | 1208133                   | c                | 1211746               | s                 | S88                         | rec4                | t                                    | S88                                   | ++                         | t      | c    | t   | c        |         | c    | c      |      | c         |    | c        | c      | c     | c      |     | c       | c    |          |         |           |         | c        |           |
| c                         | 1270862                 | c                    | 1208157                   | a                | 1211770               | s                 | S88                         | rec4                | c                                    | S88                                   | ++                         | c      | c    | c   | t        |         | a    | a      |      | a         |    | a        | a      | a     | c      |     | a       | a    |          |         |           |         | c        |           |
| t                         | 1270865                 | t                    | 1208160                   | c                | 1211773               | s                 | S88                         | rec4                | t                                    | S88                                   | ++                         | t      | a    | t   | a        |         | c    | t      |      | t         |    | c        | t      | t     | t      |     | t       | t    |          |         |           |         | a        |           |
| a                         | 1270871                 | a                    | 1208166                   | g                | 1211779               | s                 | S88                         | rec4                | a                                    | S88                                   | ++                         | a      | c    | a   | t        |         | g    | g      |      | g         |    | g        | g      | g     | g      |     | g       | g    |          |         |           |         | t        |           |
| a                         | 1270877                 | a                    | 1208172                   | t                | 1211785               | s                 | S88                         | rec4                | a                                    | S88                                   | ++                         | a      | g    | a   | g        |         | t    | a      |      | a         |    | a        | a      | a     | a      |     | a       | a    |          |         |           |         | g        |           |
| g                         | 1270901                 | g                    | 1208196                   | a                | 1211809               | s                 | S88                         | rec4                | g                                    | S88                                   | +++                        | g      | g    | g   | g        |         | g    | g      |      | g         |    | g        | g      | g     | g      |     | g       | g    |          |         |           |         | g        |           |
| t                         | 1270910                 | t                    | 1208205                   | c                | 1211818               | s                 | S88                         | rec4                | t                                    | S88                                   | ++                         | t      | a    | t   | g        |         | c    | c      |      | c         |    | c        | c      | c     | c      |     | c       | c    |          |         |           |         | g        |           |
| c                         | 1270916                 | c                    | 1208211                   | g                | 1211824               | s                 | S88                         | rec4                | g                                    | 2                                     | -                          | c      | g    | t   | g        |         | g    | g      |      | c         |    | c        | c      | c     | c      |     | c       | g    |          |         |           |         | g        |           |
| g                         | 1270919                 | g                    | 1208214                   | a                | 1211827               | s                 | S88                         | rec4                | g                                    | S88                                   | ++                         | g      | g    | g   | g        |         | a    | a      |      | g         |    | g        | g      | g     | g      |     | g       | g    |          |         |           |         | g        |           |
| t                         | 1270925                 | t                    | 1208220                   | a                | 1211833               | s                 | S88                         | rec4                | t                                    | S88                                   | ++                         | t      | g    | t   | g        |         | a    | a      |      | t         |    | t        | t      | t     | t      |     | t       | c    |          |         |           |         | c        |           |
| c                         | 1270931                 | c                    | 1208226                   | t                | 1211839               | s                 | S88                         | rec4                | c                                    | S88                                   | ++                         | c      | c    | c   | t        |         | t    | t      |      | c         |    | c        | c      | c     | c      |     | c       | t    |          |         |           |         | c        |           |
| t                         | 1270932                 | t                    | 1208227                   | g                | 1211840               | ns                | S88                         | rec4                | t                                    | S88                                   | ++                         | t      | g    | t   | g        |         | g    | g      |      | a         |    | a        | a      | a     | a      |     | a       | g    |          |         |           |         | g        |           |
| c                         | 1270934                 | c                    | 1208229                   | t                | 1211842               | ns                | S88                         | rec4                | c                                    | S88                                   | ++                         | c      | t    | c   | t        |         | g    | t      |      | t         |    | c        | c      | c     | c      |     | t       | t    |          |         |           |         | t        |           |
| g                         | 1270937                 | g                    | 1208232                   | c                | 1211845               | s                 | S88                         | rec4                | g                                    | S88                                   | ++                         | g      | c    | g   | g        |         | c    | c      |      | g         |    | g        | g      | g     | g      |     | g       | c    |          |         |           |         | g        |           |
| g                         | 1270940                 | g                    | 1208235                   | a                | 1211848               | s                 | S88                         | rec4                | g                                    | S88                                   | ++                         | g      | g    | g   | g        |         | a    | a      |      | g         |    | g        | g      | g     | g      |     | g       | a    |          |         |           |         | g        |           |
| c                         | 1270973                 | c                    | 1208268                   | a                | 1211881               | s                 | S88                         | rec4                | c                                    | S88                                   | +                          | c      | t    | a   | t        |         | a    | c      |      | a         |    | a        | a      | a     | a      |     | a       | a    |          |         |           |         | t        |           |
| g                         | 1270985                 | g                    | 1208280                   | a                | 1211893               | s                 | S88                         | rec4                | g                                    | S88                                   | ++                         | g      | a    | g   | a        |         | a    | a      |      | a         |    | a        | a      | a     | a      |     | a       | t    |          |         |           |         | a        |           |
| c                         | 1270988                 | c                    | 1208283                   | t                | 1211896               | s                 | S88                         | rec4                | c                                    | S88                                   | ++                         | c      | t    | c   | t        |         | c    | g      |      | c         |    | c        | c      | c     | c      |     | c       | c    |          |         |           |         | c        |           |
| c                         | 1270990                 | c                    | 1208285                   | t                | 1211898               | ns                | S88                         | rec4                | c                                    | S88                                   | +++                        | c      | c    | c   | c        |         | t    | c      |      | c         |    | c        | c      | c     | c      |     | c       | c    |          |         |           |         | c        |           |
| t                         | 1270994                 | t                    | 1208289                   | c                | 1211902               | s                 | S88                         | rec4                | t                                    | S88                                   | ++                         | t      | c    | t   | c        |         | c    | c      |      | c         |    | c        | c      | c     | c      |     | c       | c    |          |         |           |         | c        |           |
| a                         | 1271018                 | a                    | 1208313                   | t                | 1211926               | s                 | S88                         | rec4                | a                                    | S88                                   | ++                         | a      | c    | a   | c        |         | t    | t      |      | t         |    | t        | t      | t     | a      |     | t       | t    |          |         |           |         | c        |           |
| a                         | 1271123                 | a                    | 1208418                   | g                | 1212031               | s                 | S88                         | rec4                | a                                    | S88                                   | ++                         | a      | g    | a   | g        |         | g    | g      |      | a         |    | a        | g      | g     | a      |     | g       | g    |          |         |           |         | g        |           |
| c                         | 1271124                 | c                    | 1208419                   | t                | 1212032               | ns                | S88                         | rec4                | c                                    | S88                                   | ++                         | c      | t    | c   | t        |         | t    | t      |      | c         |    | c        | t      | t     | c      |     | t       | t    |          |         |           |         | c        |           |
| t                         | 1271147                 | t                    | 1208442                   | c                | 1212055               | s                 | S88                         | rec4                | t                                    | S88                                   | ++                         | t      | c    | t   | c        |         | c    | c      |      | c         |    | c        | c      | c     | c      |     | c       | c    |          |         |           |         | c        |           |
| a                         | 1271155                 | a                    | 1208450                   | c                | 1212063               | ns                | S88                         | rec4                | a                                    | S88                                   | ++                         | a      | c    | a   | c        |         | c    | c      |      | a         |    | c        | c      | c     | c      |     | c       | c    |          |         |           |         | c        |           |
| c                         | 1271192                 | c                    | 1208487                   | a                | 1212100               | s                 | S88                         | rec4                | c                                    | S88                                   | ++                         | c      | a    | c   | c        |         | c    | a      |      | c         |    | c        | c      | c     | c      |     | c       | c    |          |         |           |         | a        |           |
| a                         | 1271278                 | a                    | 1208573                   | g                | 1212186               | ns                | S88                         | rec4                | g                                    | 2                                     | -                          | a      | g    | g   | g        |         | g    | g      |      | g         |    | g        | g      | g     | g      |     | g       | g    |          |         |           |         | g        |           |
| c                         | 1271313                 | c                    | 1208608                   | a                | 1212221               | ns                | S88                         | rec4                | c                                    | S88                                   | ++                         | c      | c    | a   | c        |         | a    | a      |      | c         |    | a        | a      | a     | a      |     | a       | a    |          |         |           |         | c        |           |
| g                         | 1271316                 | g                    | 1208611                   | t                | 1212224               | ns                | S88                         | rec4                | g                                    | S88                                   | ++                         | g      | g    | t   | g        |         | t    | t      |      | g         |    | t        | t      | t     | t      |     | t       | t    |          |         |           |         | g        |           |
| a                         | 1271398                 | a                    | 1208693                   | t                | 1212306               | ns                | S88                         | rec4                | a                                    | S88                                   | ++                         | a      | c    | a   | c        |         | t    | t      |      | t         |    | t        | t      | t     | t      |     | t       | t    |          |         |           |         | c        |           |
| c                         | 1271456                 | c                    | 1208751                   | t                | 1212364               | s                 | S88                         | rec4                | c                                    | S88                                   | ++                         | c      | t    | c   | t        |         | c    | c      |      | c         |    | c        | c      | c     | c      |     | c       | c    |          |         |           |         | t        |           |
| g                         | 1271457                 | g                    | 1208752                   | a                | 1212365               | ns                | S88                         | rec4                | g                                    | S88                                   | ++                         | g      | g    | a   | g        |         | a    | a      |      | a         |    | a        | g      | g     | a      |     | a       | a    |          |         |           |         | g        |           |
| g                         | 1271459                 | g                    | 1208754                   | a                | 1212367               | ns                | S88                         | rec4                | g                                    | S88                                   | +                          | g      | c    | a   | t        |         | g    | a      |      | a         |    | a        | g      | g     | a      |     | a       | a    |          |         |           |         | c        |           |
| g                         | 1271512                 | g                    | 1208807                   | a                | 1212420               | ns                | S88                         | rec4                | g                                    | S88                                   | +                          | g      | a    | a   | g        |         | a    | a      |      | a         |    | a        | a      | a     | a      |     | a       | a    |          |         |           |         | a        |           |
| c                         | 1271537                 | c                    | 1208832                   | a                | 1212445               | ns                | S88                         | rec4                | c                                    | S88                                   | +                          | c      | a    | a   | a        |         | a    | a      |      | a         |    | a        | a      | a     | a      |     | a       | a    |          |         |           |         | a        |           |
| t                         | 1271550                 | t                    | 1208845                   | g                | 1212458               | ns                | S88                         | rec4                | t                                    | S88                                   | +                          | t      | g    | g   | g        |         | g    | g      |      | g         |    | g        | g      | g     | g      |     | g       | g    |          |         |           |         | a        |           |
| c                         | 1271556                 | c                    | 1208851                   | t                | 1212464               | ns                | S88                         | rec4                | c                                    | S88                                   | ++                         | c      | c    | a   | c        |         | c    | c      |      | c         |    | c        | c      | c     | c      |     | c       | c    |          |         |           |         | a        |           |
| a                         | 1271623                 | a                    | 1208918                   | t                | 1212531               | s                 | S88                         | rec4                | t                                    | 2                                     | -                          | a      | t    | t   | a        |         | t    | t      |      | t         |    | t        | c      | c     | c      |     | t       | t    |          |         |           |         | t        |           |
| g                         | 1271674                 | g                    | 1208969                   | a                | 1212582               | s                 | S88                         | rec4                | g                                    | S88                                   | ++                         | g      | c    | g   | c        |         | g    | g      |      | g         |    | g        | g      | g     | g      |     | g       | g    |          |         |           |         | c        |           |
| t                         | 1271761                 | t                    | 1209056                   | c                | 1212669               | s                 | S88                         | rec4                | c                                    | 2                                     | -                          | t      | c    | c   | t        |         | c    | c      |      | c         |    | c        | c      | c     | c      |     | c       | c    |          |         |           |         | t        |           |
| t                         | 1271813                 | t</                  |                           |                  |                       |                   |                             |                     |                                      |                                       |                            |        |      |     |          |         |      |        |      |           |    |          |        |       |        |     |         |      |          |         |           |         |          |           |

Table S8. Allocation of recombinational SNPs to lineages by virtual outgroup analysis<sup>a</sup>

| ExPEC genome site details |                         |                      |                           |                  |                       |                   |                             |                     |                                      | Outgroup Strains Details <sup>1</sup> |                            |        |      |     |          |         |       |        |      |           |    |          |        |       |        |      |         |      |          |         |           |         |         |           |
|---------------------------|-------------------------|----------------------|---------------------------|------------------|-----------------------|-------------------|-----------------------------|---------------------|--------------------------------------|---------------------------------------|----------------------------|--------|------|-----|----------|---------|-------|--------|------|-----------|----|----------|--------|-------|--------|------|---------|------|----------|---------|-----------|---------|---------|-----------|
| UT189 <sup>b</sup>        | UT189 site <sup>c</sup> | APEC 01 <sup>b</sup> | APEC 01 site <sup>c</sup> | S88 <sup>b</sup> | S88 site <sup>c</sup> | type <sup>d</sup> | Event Lineage <sup>ef</sup> | Recombinant segment | Inferred ancestral base <sup>g</sup> | Outgroup Analysis <sup>e</sup>        | Support level <sup>h</sup> | CF1073 | ED1a | 536 | E2348/69 | SMS 3-5 | IA139 | UMN026 | K-12 | ATCC 8739 | HS | D1 Sd197 | C89615 | Sakai | EDL933 | IA11 | E2437/A | SE11 | SS Ss046 | F2a 301 | F2a 245/T | F5 8401 | B4 S027 | B18 BS512 |
| c                         | 1277953                 | g                    | 1215248                   | g                | 1218861               | s                 | UT189/AS                    | rec5                | g                                    | UT189                                 | ++                         | g      | g    | c   | g        | t       | g     | g      | g    | g         | c  | g        | c      | g     | c      | g    | g       | g    | c        | t       | t         | t       | t       | c         |
| g                         | 1277955                 | a                    | 1215250                   | a                | 1218863               | ns                | UT189/AS                    | rec5                | a                                    | UT189                                 | ++                         | g      | a    | a   | g        | c       | a     | a      | a    | a         | c  | a        | c      | a     | a      | a    | a       | g    | c        | t       | t         | t       | t       | c         |
| g                         | 1277956                 | c                    | 1215251                   | c                | 1218864               | ns                | UT189/AS                    | rec5                | c                                    | UT189                                 | ++                         | c      | c    | g   | g        | c       | a     | a      | a    | a         | c  | a        | c      | a     | a      | a    | a       | g    | c        | t       | t         | t       | t       | c         |
| t                         | 1277986                 | g                    | 1215281                   | g                | 1218894               | s                 | UT189/AS                    | rec5                | g                                    | UT189                                 | ++                         | g      | g    | g   | g        | g       | g     | g      | g    | g         | c  | g        | c      | g     | t      | g    | c       | c    | t        | t       | t         | t       | t       | c         |
| c                         | 1277998                 | t                    | 1215293                   | t                | 1218906               | s                 | UT189/AS                    | rec5                | c                                    | AS                                    | ++                         | t      | c    | c   | c        | c       | c     | c      | c    | c         | c  | c        | t      | c     | c      | c    | c       | c    | c        | c       | c         | c       | c       | c         |
| g                         | 1278046                 | a                    | 1215341                   | a                | 1218954               | s                 | UT189/AS                    | rec5                | a                                    | UT189                                 | ++                         | a      | g    | a   | g        | g       | g     | g      | g    | g         | g  | g        | g      | g     | g      | g    | g       | g    | g        | g       | g         | g       | g       | g         |
| t                         | 1278118                 | c                    | 1215413                   | c                | 1219026               | s                 | UT189/AS                    | rec5                | c                                    | UT189                                 | ++++                       | c      | c    | t   | c        | c       | c     | c      | c    | c         | c  | c        | c      | c     | c      | c    | c       | c    | c        | c       | c         | c       | c       | c         |
| t                         | 1278166                 | c                    | 1215461                   | c                | 1219074               | s                 | UT189/AS                    | rec5                | c                                    | UT189                                 | ++++                       | c      | g    | c   | c        | c       | c     | c      | c    | c         | c  | c        | c      | c     | c      | c    | c       | c    | c        | c       | c         | c       | c       | c         |
| a                         | 1278337                 | g                    | 1215632                   | g                | 1219245               | s                 | UT189/AS                    | rec5                | g                                    | UT189                                 | ++                         | g      | a    | g   | a        | a       | a     | a      | a    | a         | g  | a        | a      | g     | a      | a    | a       | a    | a        | a       | a         | a       | a       | a         |
| t                         | 1278346                 | a                    | 1215641                   | a                | 1219254               | s                 | UT189/AS                    | rec5                | a                                    | UT189                                 | ++                         | a      | a    | g   | a        | a       | a     | a      | a    | a         | g  | g        | a      | g     | a      | a    | a       | a    | a        | a       | a         | a       | a       | a         |
| g                         | 1278361                 | c                    | 1215656                   | c                | 1219269               | s                 | UT189/AS                    | rec5                | c                                    | UT189                                 | ++                         | c      | t    | c   | c        | c       | c     | c      | c    | c         | t  | t        | c      | t     | c      | t    | c       | c    | c        | c       | c         | c       | c       | c         |
| t                         | 1278376                 | a                    | 1215671                   | a                | 1219284               | s                 | UT189/AS                    | rec5                | a                                    | UT189                                 | ++                         | a      | t    | a   | c        | g       | a     | a      | a    | a         | a  | t        | t      | a     | a      | t    | c       | t    | a        | a       | a         | a       | a       | g         |
| c                         | 1278418                 | t                    | 1215713                   | t                | 1219326               | s                 | UT189/AS                    | rec5                | t                                    | UT189                                 | ++                         | t      | t    | c   | c        | c       | c     | c      | c    | c         | c  | c        | c      | t     | g      | c    | c       | c    | c        | c       | c         | c       | c       | c         |
| c                         | 1278433                 | g                    | 1215728                   | g                | 1219341               | s                 | UT189/AS                    | rec5                | g                                    | UT189                                 | ++                         | g      | c    | g   | c        | g       | c     | c      | c    | c         | c  | c        | c      | t     | g      | c    | c       | c    | c        | c       | c         | c       | c       | c         |
| t                         | 1278436                 | g                    | 1215731                   | g                | 1219344               | s                 | UT189/AS                    | rec5                | g                                    | UT189                                 | ++                         | g      | g    | t   | t        | t       | t     | t      | t    | t         | t  | t        | t      | g     | g      | t    | t       | t    | t        | t       | t         | t       | t       | t         |
| c                         | 1278444                 | t                    | 1215739                   | t                | 1219352               | ns                | UT189/AS                    | rec5                | t                                    | UT189                                 | ++                         | t      | c    | t   | c        | c       | c     | c      | c    | c         | c  | c        | t      | t     | t      | c    | t       | c    | c        | c       | c         | c       | c       | c         |
| t                         | 1278448                 | c                    | 1215743                   | c                | 1219356               | s                 | UT189/AS                    | rec5                | c                                    | UT189                                 | ++                         | c      | c    | c   | t        | c       | t     | c      | t    | c         | t  | c        | c      | t     | t      | t    | c</     |      |          |         |           |         |         |           |

Page 4

| ExPEC genome site details |                         |                      |                           |                  |                       |                   |                             |                     |                                      | Outgroup Strains Details <sup>1</sup> |                            |        |      |     |          |         |       |        |      |           |    |          |        |       |        |      |         |      |          |         |           |         |          |           |
|---------------------------|-------------------------|----------------------|---------------------------|------------------|-----------------------|-------------------|-----------------------------|---------------------|--------------------------------------|---------------------------------------|----------------------------|--------|------|-----|----------|---------|-------|--------|------|-----------|----|----------|--------|-------|--------|------|---------|------|----------|---------|-----------|---------|----------|-----------|
| UTI89 <sup>b</sup>        | UTI89 site <sup>c</sup> | APEC 01 <sup>b</sup> | APEC 01 site <sup>c</sup> | S88 <sup>b</sup> | S88 site <sup>c</sup> | type <sup>d</sup> | Event Lineage <sup>ef</sup> | Recombinant segment | Inferred ancestral base <sup>g</sup> | Outgroup Analysis <sup>a</sup>        | Support level <sup>h</sup> | CF1073 | ED1a | 536 | E2348/69 | SMS 3-5 | IA139 | UMN026 | K-12 | ATCC 8739 | HS | D1 Sd197 | CB9615 | Sakai | EDL933 | IA11 | E24377A | SE11 | SS Ss046 | F2a 301 | F2a 2457T | F5 8401 | B4 Ss227 | B18 BS512 |
| g                         | 1416163                 | g                    | 1354077                   | t                | 1358183               | s                 | S88                         | rec8                | g                                    | S88                                   | +                          | t      | g    | g   | g        | g       | t     |        |      |           |    | t        | g      | g     |        |      | g       |      | t        | t       | t         |         | g        |           |
| c                         | 1416169                 | c                    | 1354083                   | t                | 1358189               | s                 | S88                         | rec8                | t                                    | 2                                     | -                          | t      | c    | t   | c        | c       |       |        |      |           | t  | t        | t      |       |        | t    |         | t    | t        | t       | t         | c       |          |           |
| c                         | 1416217                 | c                    | 1354131                   | t                | 1358237               | s                 | S88                         | rec8                | t                                    | 2                                     | -                          | t      | c    | t   | c        | c       |       |        |      |           | t  | t        | t      |       |        | t    |         | t    | t        | t       | t         | c       |          |           |
| a                         | 1416281                 | a                    | 1354195                   | g                | 1358301               | ns                | S88                         | rec8                | g                                    | 2                                     | -                          | g      | g    | g   | a        | a       |       |        |      |           | g  | g        | g      |       |        | g    |         | g    | g        | g       | a         | a       |          |           |
| c                         | 1416283                 | c                    | 1354197                   | t                | 1358303               | ns                | S88                         | rec8                | t                                    | 2                                     | -                          | t      | t    | t   | t        | c       | c     |        |      |           |    | t        | t      | t     |        |      | t       |      | t        | t       | t         | c       |          |           |
| t                         | 1416301                 | t                    | 1354215                   | g                | 1358321               | s                 | S88                         | rec8                | g                                    | 2                                     | -                          | g      | g    | g   | g        | t       | g     |        |      |           |    | g        | g      | g     |        |      | g       |      | g        | g       | g         |         |          |           |
| c                         | 1416304                 | c                    | 1354218                   | t                | 1358324               | s                 | S88                         | rec8                | t                                    | 2                                     | -                          | t      | t    | t   | t        | c       | c     |        |      |           |    |          | t      | t     | t      |      |         | t    |          | t       | t         | t       | c        |           |
| c                         | 1416310                 | c                    | 1354224                   | t                | 1358330               | s                 | S88                         | rec8                | t                                    | 2                                     | -                          | t      | c    | t   | c        | t       |       |        |      |           | t  | c        | c      |       |        | t    |         | t    | t        | t       | t         | c       |          |           |
| a                         | 1416331                 | a                    | 1354245                   | g                | 1358351               | s                 | S88                         | rec8                | a                                    | S88                                   | +                          | g      | a    | a   | a        | a       | g     |        |      |           |    | g        | a      | a     |        |      | g       |      | g        | g       | g         | a       |          |           |
| g                         | 1416406                 | g                    | 1354320                   | a                | 1358426               | s                 | S88                         | rec8                | g                                    | S88                                   | +                          | a      | g    | g   | g        | a       | g     |        |      |           |    |          |        |       |        | a    |         | g    |          | g       | g         | g       | a        |           |
| g                         | 1416407                 | g                    | 1354321                   | t                | 1358427               | ns                | S88                         | rec8                | g                                    | S88                                   | +                          | t      | g    | g   | g        | g       | t     |        |      |           |    | t        |        |       |        | g    |         | g    |          | g       | g         | g       | a        |           |
| g                         | 1416412                 | g                    | 1354326                   | a                | 1358432               | s                 | S88                         | rec8                | g                                    | S88                                   | +                          | a      | g    | g   | g        | g       | a     |        |      |           |    |          |        |       |        | a    |         | g    |          | g       | g         | g       | a        |           |
| c                         | 1416418                 | c                    | 1354332                   | t                | 1358438               | s                 | S88                         | rec8                | c                                    | S88                                   | +                          | t      | c    | c   | c        | c       | t     |        |      |           |    | t        |        |       |        | c    |         | c    |          | c       | c         | c       | c        |           |
| c                         | 1416421                 | c                    | 1354335                   | t                | 1358441               | s                 | S88                         | rec8                | c                                    | S88                                   | +                          | t      | c    | c   | c        | c       | t     |        |      |           |    | t        |        |       |        | t    |         | c    |          | c       | c         | c       | c        |           |
| c                         | 1416427                 | c                    | 1354341                   | t                | 1358447               | s                 | S88                         | rec8                | c                                    | S88                                   | +                          | t      | c    | c   | c        | c       | t     |        |      |           |    | t        |        |       |        | t    |         | t    |          | t       | t         | t       | c        |           |
| t                         | 1416433                 | t                    | 1354347                   | c                | 1358453               | s                 | S88                         | rec8                | t                                    | S88                                   | +                          | c      | t    | t   | t        | c       | c     |        |      |           |    | c        |        |       |        | t    |         | t    |          | t       | t         | t       | c        |           |
| c                         | 1416478                 | c                    | 1354392                   | g                | 1358498               | s                 | S88                         | rec8                | c                                    | S88                                   | +                          | g      | c    | t   | c        | c       | c     |        |      |           |    | g        |        |       |        | c    |         | c    |          | c       | c         | c       | c        |           |
| g                         | 1416508                 | g                    | 1354422                   | a                | 1358528               | s                 | S88                         | rec8                | g                                    | S88                                   | +                          | a      | g    | g   | g        | g       | a     |        |      |           |    |          |        |       |        | g    |         | g    |          | g       | g         | g       | a        |           |
| c                         | 1416514                 | c                    | 1354428                   | t                | 1358534               | s                 | S88                         | rec8                | c                                    | S88                                   | +                          | t      | c    | c   | c        | c       | t     |        |      |           |    | t        |        |       |        |      |         |      |          |         |           |         |          |           |

Table S8. Allocation of recombinational SNPs to lineages by virtual outgroup analysis<sup>a</sup>

| ExPEC genome site details |                         |                      |                           |                  |                       |                   |                             |                     |                                      | Outgroup Strains Details <sup>1</sup> |                            |        |      |     |          |         |      |        |      |           |    |          |        |       |        |     |         |      |          |         |           |         |          |           |
|---------------------------|-------------------------|----------------------|---------------------------|------------------|-----------------------|-------------------|-----------------------------|---------------------|--------------------------------------|---------------------------------------|----------------------------|--------|------|-----|----------|---------|------|--------|------|-----------|----|----------|--------|-------|--------|-----|---------|------|----------|---------|-----------|---------|----------|-----------|
| UT189 <sup>b</sup>        | UTI89 site <sup>c</sup> | APEC 01 <sup>b</sup> | APEC 01 site <sup>c</sup> | S88 <sup>b</sup> | S88 site <sup>c</sup> | type <sup>d</sup> | Event Lineage <sup>ef</sup> | Recombinant segment | Inferred ancestral base <sup>g</sup> | Outgroup Analysis <sup>g</sup>        | Support level <sup>h</sup> | CFT073 | ED1a | 536 | E2348/69 | SMS 3-5 | IA39 | UMN026 | K-12 | ATCC 8739 | HS | D1 Sd197 | CB9615 | Sakai | EDL933 | IA1 | E24377A | SE11 | SS Ss046 | F2a 301 | F2a 2457T | F5 8401 | B4 Sb227 | B18 BS512 |
| c                         | 1545313                 | t                    | 1534232                   | c                | 1487325               | s                 | APEC                        | rec11               | c                                    | APEC                                  | +++                        | c      | a    | c   |          |         |      |        |      | c         |    |          |        |       |        |     |         |      |          |         |           |         |          |           |
| t                         | 1545316                 | c                    | 1534235                   | t                | 1487328               | s                 | APEC                        | rec11               | t                                    | APEC                                  | +++                        | t      | c    | t   |          |         |      |        |      | t         |    |          |        |       |        |     |         |      |          |         |           |         |          |           |
| a                         | 1545337                 | g                    | 1534256                   | a                | 1487349               | s                 | APEC                        | rec11               | g                                    | 2                                     | -                          | g      | a    | g   |          |         |      |        |      | g         |    |          |        |       |        |     |         |      |          |         |           |         |          |           |
| t                         | 1545343                 | c                    | 1534262                   | t                | 1487355               | s                 | APEC                        | rec11               | t                                    | APEC                                  | +++                        | t      | c    | t   |          |         |      |        |      | t         |    |          |        |       |        |     |         |      |          |         |           |         |          |           |
| c                         | 1545346                 | g                    | 1534265                   | c                | 1487358               | s                 | APEC                        | rec11               | c                                    | APEC                                  | +++                        | c      | c    | c   |          |         |      |        |      | t         |    |          |        |       |        |     |         |      |          |         |           |         |          |           |
| t                         | 1545349                 | c                    | 1534268                   | t                | 1487361               | s                 | APEC                        | rec11               | t                                    | APEC                                  | ++                         | t      | c    | t   |          |         |      |        |      | c         |    |          |        |       |        |     |         |      |          |         |           |         |          |           |
| a                         | 1545363                 | g                    | 1534282                   | a                | 1487375               | ns                | APEC                        | rec11               | g                                    | 2                                     | -                          | g      | g    | a   |          |         |      |        |      | g         |    |          |        |       |        |     |         |      |          |         |           |         |          |           |
| c                         | 1545364                 | t                    | 1534283                   | c                | 1487376               | ns                | APEC                        | rec11               | c                                    | APEC                                  | +++                        | t      | c    | c   |          |         |      |        |      | c         |    |          |        |       |        |     |         |      |          |         |           |         |          |           |
| c                         | 1545373                 | t                    | 1534292                   | c                | 1487385               | s                 | APEC                        | rec11               | t                                    | 2                                     | -                          | t      | t    | c   |          |         |      |        |      | c         |    |          |        |       |        |     |         |      |          |         |           |         |          |           |
| c                         | 1545403                 | t                    | 1534322                   | c                | 1487415               | s                 | APEC                        | rec11               | t                                    | 2                                     | -                          | t      | t    | c   |          |         |      |        |      | t         |    |          |        |       |        |     |         |      |          |         |           |         |          |           |
| c                         | 1545406                 | t                    | 1534325                   | c                | 1487418               | s                 | APEC                        | rec11               | t                                    | 2                                     | -                          | t      | t    | c   |          |         |      |        |      | t         |    |          |        |       |        |     |         |      |          |         |           |         |          |           |
| c                         | 1545430                 | t                    | 1534349                   | c                | 1487442               | s                 | APEC                        | rec11               | c                                    | APEC                                  | +++                        | c      | c    | c   |          |         |      |        |      | c         |    |          |        |       |        |     |         |      |          |         |           |         |          |           |
| c                         | 1545433                 | a                    | 1534352                   | c                | 1487445               | ns                | APEC                        | rec11               | c                                    | APEC                                  | ++                         | c      | t    | c   |          |         |      |        |      | a         |    |          |        |       |        |     |         |      |          |         |           |         |          |           |
| t                         | 1545487                 | c                    | 1534406                   | t                | 1487499               | s                 | APEC                        | rec11               | c                                    | 2                                     | -                          | c      | g    | c   |          |         |      |        |      |           |    |          |        |       |        |     |         |      |          |         |           |         |          |           |
| t                         | 2085863                 | g                    | 2106620                   | g                | 2014291               | s                 | AS                          | rec12               | t                                    | AS                                    | +++                        | t      | t    | t   |          |         |      |        |      | t         |    |          |        |       |        |     |         |      |          |         |           |         |          |           |
| a                         | 2085899                 | g                    | 2106656                   | g                | 2014327               | s                 | AS                          | rec12               | a                                    | AS                                    | +++                        | a      | a    | a   |          |         |      |        |      | a         |    |          |        |       |        |     |         |      |          |         |           |         |          |           |
| c                         | 2085905                 | t                    | 2106662                   | t                | 2014333               | s                 | AS                          | rec12               | c                                    | AS                                    | +++                        | c      | c    | c   |          |         |      |        |      | c         |    |          |        |       |        |     |         |      |          |         |           |         |          |           |
| t                         | 2085935                 | c                    | 2106692                   | c                | 2014363               | s                 | AS                          | rec12               | t                                    | AS                                    | +++                        | t      | t    | t   |          |         |      |        |      | t         |    |          |        |       |        |     |         |      |          |         |           |         |          |           |
| t                         | 2085941                 | c                    | 2106698                   | c                | 2014369               | s                 | AS                          | rec12               | t                                    | AS                                    | +++                        | t      | t    | t   |          |         |      |        |      | t         |    |          |        |       |        |     |         |      |          |         |           |         |          |           |
| c                         | 2085953                 | t                    | 2106710                   | t                | 2014381               | s                 | AS                          | rec12               | c                                    | AS                                    | +++                        | c      | c    | c   |          |         |      |        |      | c         |    |          |        |       |        |     |         |      |          |         |           |         |          |           |
| c                         | 2085989                 | t                    | 2106746                   | t                | 2014417               | s                 | AS                          | rec12               | c                                    | AS                                    | +++                        | c      | c    | c   |          |         |      |        |      | c         |    |          |        |       |        |     |         |      |          |         |           |         |          |           |
| g                         | 2086007                 | t                    | 2106764                   | t                | 2014435               | s                 | AS                          | rec12               | g                                    | AS                                    | +++                        | g      | g    | g   |          |         |      |        |      | g         |    |          |        |       |        |     |         |      |          |         |           |         |          |           |
| c                         | 2086079                 | t                    | 2106836                   | t                | 2014507               | s                 | AS                          | rec12               | c                                    | AS                                    | +++                        | c      | c    | c   |          |         |      |        |      | c         |    |          |        |       |        |     |         |      |          |         |           |         |          |           |
| a                         | 2086124                 | c                    | 2106881                   | c                | 2014552               | s                 | AS                          | rec12               | a                                    | AS                                    | +++                        | a      | a    | a   |          |         |      |        |      | a         |    |          |        |       |        |     |         |      |          |         |           |         |          |           |
| a                         | 2086130                 | g                    | 2106887                   | g                | 2014558               | s                 | AS                          | rec12               | a                                    | AS                                    | +++                        | a      | a    | a   |          |         |      |        |      | a         |    |          |        |       |        |     |         |      |          |         |           |         |          |           |
| a                         | 2086136                 | g                    | 2106893                   | g                | 2014564               | s                 | AS                          | rec12               | a                                    | AS                                    | +++                        | a      | a    | a   |          |         |      |        |      | a         |    |          |        |       |        |     |         |      |          |         |           |         |          |           |
| c                         | 2086226                 | t                    | 2106983                   | t                | 2014654               | s                 | AS                          | rec12               | c                                    | AS                                    | +++                        | c      | c    | c   |          |         |      |        |      | c         |    |          |        |       |        |     |         |      |          |         |           |         |          |           |
| t                         | 2086238                 | a                    | 2106995                   | a                | 2014666               | s                 | AS                          | rec12               | t                                    | AS                                    | +++                        | t      | t    | t   |          |         |      |        |      | t         |    |          |        |       |        |     |         |      |          |         |           |         |          |           |
| t                         | 2086265                 | g                    | 2107022                   | g                | 2014693               | s                 | AS                          | rec12               | t                                    | AS                                    | +++                        | t      | t    | t   |          |         |      |        |      | t         |    |          |        |       |        |     |         |      |          |         |           |         |          |           |
| t                         | 2086277                 | c                    | 2107034                   | c                | 2014705               | s                 | AS                          | rec12               | t                                    | AS                                    | +++                        | t      | t    | t   |          |         |      |        |      | t         |    |          |        |       |        |     |         |      |          |         |           |         |          |           |
| c                         | 2086278                 | a                    | 2107035                   | a                | 2014706               | ns                | AS                          | rec12               | c                                    | AS                                    | +++                        | c      | c    | c   |          |         |      |        |      | c         |    |          |        |       |        |     |         |      |          |         |           |         |          |           |
| a                         | 2086279                 | g                    | 2107036                   | g                | 2014707               | ns                | AS                          | rec12               | a                                    | AS                                    | +++                        | a      | a    | a   |          |         |      |        |      | a         |    |          |        |       |        |     |         |      |          |         |           |         |          |           |
| t                         | 2086307                 | c                    | 2107064                   | c                | 2014735               | s                 | AS                          | rec12               | t                                    | AS                                    | +++                        | t      | t    | t   |          |         |      |        |      | t         |    |          |        |       |        |     |         |      |          |         |           |         |          |           |
| c                         | 2086310                 | t                    | 2107067                   | t                | 2014738               | s                 | AS                          | rec12               | c                                    | AS                                    | +++                        | c      | c    | c   |          |         |      |        |      | c         |    |          |        |       |        |     |         |      |          |         |           |         |          |           |
| c                         | 2086316                 | g                    | 2107073                   | g                | 2014744               | s                 | AS                          | rec12               | c                                    | AS                                    | +++                        | c      | c    | c   |          |         |      |        |      | c         |    |          |        |       |        |     |         |      |          |         |           |         |          |           |
| g                         | 2086334                 | a                    | 2107091                   | a                | 2014762               | s                 | AS                          | rec12               | g                                    | AS                                    | +++                        | g      | g    | g   |          |         |      |        |      | g         |    |          |        |       |        |     |         |      |          |         |           |         |          |           |
| a                         | 2086367                 | c                    | 2107124                   | c                | 2014795               | s                 | AS                          | rec12               | a                                    | AS                                    | +++                        | a      | a    | a   |          |         |      |        |      | a         |    |          |        |       |        |     |         |      |          |         |           |         |          |           |
| g                         | 2086379                 | a                    | 2107136                   | a                | 2014807               | s                 | AS                          | rec12               | g                                    | AS                                    | +++                        | g      | g    | g   |          |         |      |        |      | g         |    |          |        |       |        |     |         |      |          |         |           |         |          |           |
| t                         | 2086388                 | a                    | 2107145                   | a                | 2014816               | s                 | AS                          | rec12               | t                                    | AS                                    | +++                        | t      | t    | t   |          |         |      |        |      | t         |    |          |        |       |        |     |         |      |          |         |           |         |          |           |
| c                         | 2086395                 | t                    | 2107152                   | t                | 2014823               | s                 | AS                          | rec12               | c                                    | AS                                    | +++                        | c      | c    | c   |          |         |      |        |      | c         |    |          |        |       |        |     |         |      |          |         |           |         |          |           |
| t                         | 2086403                 | c                    | 2107160                   | c                | 2014831               | s                 | AS                          | rec12               | t                                    | AS                                    | +++                        | t      | t    | t   |          |         |      |        |      | t         |    |          |        |       |        |     |         |      |          |         |           |         |          |           |
| a                         | 2086427                 | g                    | 2107184                   | g                | 2014855               | s                 | AS                          | rec12               | a                                    | AS                                    | +++                        | a      | a    | a   |          |         |      |        |      | a         |    |          |        |       |        |     |         |      |          |         |           |         |          |           |
| a                         | 2086433                 | g                    | 2107190                   | g                | 2014861               | s                 | AS                          | rec12               | a                                    | AS                                    | +++                        | a      | a    | a   |          |         |      |        |      | a         |    |          |        |       |        |     |         |      |          |         |           |         |          |           |
| a                         | 2086449                 | g                    | 2107206                   | g                | 2014877               | ns                | AS                          | rec12               | a                                    | AS                                    | +++                        | a      | a    | a   |          |         |      |        |      | a         |    |          |        |       |        |     |         |      |          |         |           |         |          |           |
| g                         | 2086454                 | a                    | 2107211                   | a                | 2014882               | s                 | AS                          | rec12               | g                                    | AS                                    | +++                        | g      | g    | g   |          |         |      |        |      | g         |    |          |        |       |        |     |         |      |          |         |           |         |          |           |
| a                         | 2086463                 | g                    | 2107220                   | g                | 2014891               | s                 | AS                          | rec12               | a                                    | AS                                    | +++                        | a      | a    | a   |          |         |      |        |      | a         |    |          |        |       |        |     |         |      |          |         |           |         |          |           |
| g                         | 2086466                 | a                    | 2107223                   | a                | 2014894               | s                 | AS                          | rec12               | g                                    | AS                                    | +++                        | g      | g    | g   |          |         |      |        |      | g         |    |          |        |       |        |     |         |      |          |         |           |         |          |           |
| a                         | 2086469                 | g                    | 2107226                   | g                | 2014897               | s                 | AS                          | rec12               | a                                    | AS                                    | +++                        | a      | a    | a   |          |         |      |        |      | a         |    |          |        |       |        |     |         |      |          |         |           |         |          |           |
| c                         | 2086478                 | t                    | 2107235                   | t                | 2014906               | s                 | AS                          | rec12               | c                                    | AS                                    | +++                        | c      | c    | c   |          |         |      |        |      | c         |    |          |        |       |        |     |         |      |          |         |           |         |          |           |
| c                         | 2086499                 | a                    | 2107256                   | a                | 2014927               | s                 | AS                          | rec12               | c                                    | AS                                    | +++                        | c      | c    | c   |          |         |      |        |      | c         |    |          |        |       |        |     |         |      |          |         |           |         |          |           |
| c                         | 2086556                 | t                    | 2107313                   | t                | 2014984               | s                 | AS                          | rec12               | c                                    | AS                                    | +++                        | c      | c    | c   |          |         |      |        |      | c         |    |          |        |       |        |     |         |      |          |         |           |         |          |           |
| a                         | 2086587                 | g                    | 2107344                   | g                | 2015015               | ns                | AS                          | rec12               | a                                    | AS                                    | +++                        | a      | a    | a   |          |         |      |        |      | a         |    |          |        |       |        |     |         |      |          |         |           |         |          |           |
| c                         | 2086604                 | t                    | 2107361                   | t                | 2015032               | s                 | AS                          | rec12               | c                                    | AS                                    | +++                        | c      | c    | c   |          |         |      |        |      | c         |    |          |        |       |        |     |         |      |          |         |           |         |          |           |
| a                         | 2086676                 | g                    | 2107433                   | g                | 2015104               | s                 | AS                          | rec12               | a                                    | AS                                    | +++                        | a      | a    | a   |          |         |      |        |      | a         |    |          |        |       |        |     |         |      |          |         |           |         |          |           |
| g                         | 2086677                 | a                    | 2107434                   | a                | 2015105               | ns                | AS                          | rec12               | g                                    | AS                                    | +++                        | g      | g    | g   |          |         |      |        |      | g         |    |          |        |       |        |     |         |      |          |         |           |         |          |           |
| t                         | 2086695                 | g                    | 2107452                   | g                | 2015123               | ns                | AS                          | rec12               | t                                    | AS                                    | +++                        | t      | t    | t   |          |         |      |        |      | t         |    |          |        |       |        |     |         |      |          |         |           |         |          |           |
| c                         | 2086696                 | a                    | 2107453                   | a                | 2015124               | ns                | AS                          | rec12               | c                                    | AS                                    | +++                        | c      | c    | c   |          |         |      |        |      | c         |    |          |        |       |        |     |         |      |          |         |           |         |          |           |
| a                         | 2086709                 | g                    | 2107466                   | g                | 2015137               | s                 | AS                          | rec12               | a                                    | AS                                    | +++                        | a      | a    | a   |          |         |      |        |      | a         |    |          |        |       |        |     |         |      |          |         |           |         |          |           |
| c                         | 2086736                 | t                    | 2107493                   | t                | 2015164               | s                 | AS                          | rec12               | c                                    | AS                                    | +++                        | c      | c    | c   |          |         |      |        |      | c         |    |          |        |       |        |     |         |      |          |         |           |         |          |           |
| c                         | 2086739                 | t                    | 2107496                   | t                | 2015167               | s                 | AS                          | rec12               | c                                    | AS                                    | +++                        | c      | c    | c   |          |         |      |        |      | c         |    |          |        |       |        |     |         |      |          |         |           |         |          |           |
| c                         | 2086753                 | t                    | 2107510                   | t                | 2015181               | ns                | AS                          | rec12               | c                                    | AS                                    | +++                        | c      | c    | c   |          |         |      |        |      | c         |    |          |        |       |        |     |         |      |          |         |           |         |          |           |
| g                         | 2086778                 | c                    | 2107535                   | c                | 2015206               | ns                | AS                          | rec12               | g                                    | AS                                    | +++                        | g      | g    | g   |          |         |      |        |      | g         |    |          |        |       |        |     |         |      |          |         |           |         |          |           |
| g                         | 2086788                 | a                    | 2107545                   | a                | 2015216               | ns                | AS                          | rec12               | g                                    | AS                                    | +++                        | g      | g    | g   |          |         |      |        |      | g         |    |          |        |       |        |     |         |      |          |         |           |         |          |           |

Table S8. Allocation of recombinational SNPs to lineages by virtual outgroup analysis<sup>a</sup>[illegible]

Table S8. Allocation of recombinational SNPs to lineages by virtual outgroup analysis<sup>a</sup>

| ExPEC genome site details |                         |                      |                           |                  |                       |                   |                             |                     |                                      | Outgroup Strains Details <sup>1</sup> |                            |        |      |     |          |         |      |        |      |           |    |          |        |       |        |     |         |      |          |         |           |         |          |           |   |
|---------------------------|-------------------------|----------------------|---------------------------|------------------|-----------------------|-------------------|-----------------------------|---------------------|--------------------------------------|---------------------------------------|----------------------------|--------|------|-----|----------|---------|------|--------|------|-----------|----|----------|--------|-------|--------|-----|---------|------|----------|---------|-----------|---------|----------|-----------|---|
| UT189 <sup>b</sup>        | UT189 site <sup>c</sup> | APEC 01 <sup>b</sup> | APEC 01 site <sup>c</sup> | S88 <sup>b</sup> | S88 site <sup>c</sup> | type <sup>d</sup> | Event Lineage <sup>ef</sup> | Recombinant segment | Inferred ancestral base <sup>g</sup> | Outgroup Analysis <sup>h</sup>        | Support level <sup>h</sup> | CFT073 | ED1a | 536 | E2348/69 | SMS 3-5 | IA39 | UMN026 | K-12 | ATCC 8739 | HS | D1 Sd197 | CB9615 | Sakai | EDL933 | IA1 | E24377A | SE11 | SS Sd046 | F2a 301 | F2a 2457T | F5 8401 | B4 Sd227 | B18 BS512 |   |
| -                         | 2114000                 | a                    | 2147092                   | g                | 2054761               | nc                | APEC                        | rec13               | g                                    | APEC                                  | +++                        | g      | g    | g   |          |         |      |        |      |           | g  |          |        |       |        |     |         |      |          |         |           |         |          |           |   |
| -                         | 2114000                 | c                    | 2147678                   | t                | 2055347               | nc                | APEC                        | rec13               | t                                    | APEC                                  | ++                         | t      | c    | t   | c        |         |      |        |      |           |    |          |        |       |        |     |         |      |          |         |           |         |          |           |   |
| -                         | 2114000                 | t                    | 2147719                   | g                | 2055391               | nc                | APEC                        | rec13               | g                                    | APEC                                  | ++                         | g      | t    | g   | t        |         |      |        |      |           |    | g        | g      |       |        |     |         | g    |          |         |           |         |          |           |   |
| -                         | 2114000                 | c                    | 2147735                   | t                | 2055407               | nc                | APEC                        | rec13               | t                                    | APEC                                  | ++                         | t      | c    | t   | c        |         |      |        |      |           |    | c        | c      |       |        |     |         |      |          |         |           |         |          |           |   |
| -                         | 2114000                 | c                    | 2147738                   | t                | 2055410               | nc                | APEC                        | rec13               | t                                    | APEC                                  | ++                         | t      | c    | t   | c        |         |      |        |      |           |    | c        | c      |       |        |     |         |      |          |         |           |         |          |           |   |
| -                         | 2114000                 | t                    | 2147746                   | c                | 2055418               | nc                | APEC                        | rec13               | c                                    | APEC                                  | ++                         | c      | t    | c   | t        |         |      |        |      |           |    | c        | c      |       |        |     |         |      |          |         |           |         |          |           |   |
| -                         | 2114000                 | t                    | 2147945                   | c                | 2055617               | nc                | APEC                        | rec13               | c                                    | APEC                                  | ++++                       | c      | c    | c   | c        |         |      |        |      |           |    | c        | c      |       |        |     |         |      |          |         |           |         |          |           |   |
| -                         | 2114000                 | t                    | 2149052                   | g                | 2056724               | nc                | APEC                        | rec13               | g                                    | APEC                                  | ++                         | g      | t    | g   | t        |         |      |        |      |           |    | t        |        | g     |        |     |         | g    |          |         |           |         |          |           |   |
| -                         | 2114000                 | t                    | 2149719                   | g                | 2057391               | nc                | APEC                        | rec13               | g                                    | APEC                                  | +++                        | g      | g    | g   | g        |         |      |        |      |           |    |          |        |       |        |     |         | t    |          |         |           |         |          |           |   |
| -                         | 2114000                 | a                    | 2149814                   | g                | 2057486               | nc                | APEC                        | rec13               | g                                    | APEC                                  | +++                        | g      | g    | g   | g        |         |      |        |      |           |    |          |        |       |        |     |         | a    |          |         |           |         |          |           |   |
| -                         | 2114000                 | a                    | 2150121                   | g                | 2060333               | nc                | APEC                        | rec13               | g                                    | APEC                                  | +++                        | g      | g    | g   | g        |         |      |        |      |           |    | g        |        |       |        |     |         | g    |          |         |           |         |          |           |   |
| -                         | 2114000                 | c                    | 2150230                   | g                | 2060442               | nc                | APEC                        | rec13               | g                                    | APEC                                  | +++                        | g      | g    | g   | g        |         |      |        |      |           |    | g        |        |       |        |     |         | g    |          |         |           |         |          |           |   |
| -                         | 2114000                 | 1                    | 2150632                   | -                | 2060843               | ins               | APEC                        | rec13               | 1                                    | 2                                     | -                          | 1      | -    | 1   | 1        | -       |      |        |      |           |    | 1        |        | 1     |        |     |         | 1    |          |         |           |         |          |           |   |
| -                         | 2193784                 | 7                    | 2060633                   | 7                | 2060844               | del               | APEC                        | rec13               | 7                                    | UT189                                 | ++                         | 7      | -    | 7   | 7        | -       |      |        |      |           |    | 7        |        | 7     |        |     |         | 7    |          |         |           |         |          |           |   |
| a                         | 2195486                 | t                    | 2150877                   | a                | 2061089               | s                 | APEC                        | rec13               | a                                    | APEC                                  | ++                         | g      | a    | a   | a        |         |      |        |      |           |    | g        | a      |       |        |     |         | g    |          |         |           |         |          |           |   |
| g                         | 2196088                 | c                    | 2151479                   | g                | 2061691               | ns                | APEC                        | rec13               | g                                    | APEC                                  | +++                        | g      | g    | g   | g        |         |      |        |      |           |    | g        | g      |       |        |     |         | g    |          |         |           |         |          |           |   |
| g                         | 2196511                 | t                    | 2151902                   | g                | 2062114               | nc                | APEC                        | rec13               | g                                    | APEC                                  | +++                        | g      | g    | g   | t        |         |      |        |      |           |    |          | g      |       |        |     |         |      |          |         |           |         |          |           |   |
| t                         | 2260782                 | c                    | 2210287                   | t                | 2120205               | s                 | APEC                        | rec13               | t                                    | APEC                                  | ++++                       | t      | t    | t   | t        | t       | t    | t      | t    | t         | t  | t        | t      | t     | t      | t   | t       | t    | t        | t       | t         | t       | t        | t         |   |
| c                         | 2260818                 | t                    | 2210323                   | c                | 2120241               | s                 | APEC                        | rec13               | c                                    | APEC                                  | ++                         | c      | c    | c   | c        | c       | c    | c      | c    | c         | c  | c        | c      | c     | c      | c   | c       | c    | c        | c       | c         | c       | c        | c         |   |
| c                         | 2260827                 | t                    | 2210332                   | c                | 2120250               | s                 | APEC                        | rec13               | c                                    | APEC                                  | ++                         | c      | c    | c   | t        | c       | t    | t      | c    | c         | c  | c        | c      | c     | c      | c   | c       | c    | c        | c       | c         | c       | c        | c         |   |
| g                         | 2260851                 | a                    | 2210356                   | g                | 2120274               | s                 | APEC                        | rec13               | g                                    | APEC                                  | ++                         | a      | g    | g   | g        | a       | g    | g      | g    | g         | g  | a        | g      | g     | g      | g   | g       | g    | g        | g       | g         | g       | g        | g         |   |
| g                         | 2260869                 | a                    | 2210374                   | g                | 2120292               | s                 | APEC                        | rec13               | g                                    | APEC                                  | ++                         | a      | g    | g   | g        | g       | g    | g      | g    | g         | g  | g        | g      | g     | g      | g   | g       | g    | g        | g       | g         | g       | g        | g         |   |
| g                         | 2260911                 | a                    | 2210416                   | g                | 2120334               | s                 | APEC                        | rec13               | g                                    | APEC                                  | +++                        | g      | g    | g   | g        | g       | g    | g      | g    | g         | g  | g        | g      | g     | g      | g   | g       | g    | g        | g       | g         | g       | g        | g         |   |
| c                         | 2261025                 | a                    | 2210530                   | c                | 2120448               | s                 | APEC                        | rec13               | c                                    | APEC                                  | ++                         | c      | c    | c   | c        | c       | t    | c      | t    | c         | c  | c        | c      | c     | c      | c   | c       | c    | c        | c       | c         | c       | c        | c         |   |
| a                         | 2261136                 | g                    | 2210641                   | a                | 2120559               | s                 | APEC                        | rec13               | a                                    | APEC                                  | +++                        | a      | g    | a   | a        | a       | a    | a      | a    | a         | a  | a        | a      | a     | a      | a   | a       | a    | a        | a       | a         | a       | a        | a         |   |
| g                         | 2261157                 | a                    | 2210662                   | g                | 2120580               | s                 | APEC                        | rec13               | g                                    | APEC                                  | +++                        | g      | g    | g   | g        | g       | g    | g      | g    | g         | g  | g        | g      | g     | g      | g   | g       | g    | g        | g       | g         | g       | g        | g         |   |
| a                         | 2261217                 | g                    | 2210722                   | a                | 2120640               | s                 | APEC                        | rec13               | a                                    | APEC                                  | ++                         | a      | a    | a   | a        | a       | a    | a      | a    | a         | a  | a        | a      | a     | a      | a   | a       | a    | a        | a       | a         | a       | a        | a         |   |
| c                         | 2261235                 | t                    | 2210740                   | c                | 2120658               | s                 | APEC                        | rec13               | c                                    | APEC                                  | +++                        | c      | c    | c   | c        | c       | c    | c      | c    | c         | c  | c        | c      | c     | c      | c   | c       | c    | c        | c       | c         | c       | c        | c         |   |
| a                         | 2261382                 | g                    | 2210887                   | a                | 2120805               | s                 | APEC                        | rec13               | a                                    | APEC                                  | ++                         | a      | g    | a   | g        | a       | a    | a      | a    | a         | a  | a        | a      | a     | a      | a   | a       | a    | a        | a       | a         | a       | a        | a         |   |
| g                         | 2261426                 | a                    | 2210931                   | g                | 2120849               | ns                | APEC                        | rec13               | g                                    | APEC                                  | +++                        | g      | g    | g   | g        | g       | g    | g      | g    | g         | g  | g        | g      | g     | g      | g   | g       | g    | g        | g       | g         | g       | g        | g         |   |
| a                         | 2261433                 | g                    | 2210938                   | a                | 2120856               | s                 | APEC                        | rec13               | a                                    | APEC                                  | ++                         | a      | g    | a   | g        | a       | a    | a      | a    | a         | a  | a        | a      | a     | a      | a   | a       | a    | a        | a       | a         | a       | a        | a         |   |
| a                         | 2261448                 | g                    | 2210953                   | a                | 2120871               | s                 | APEC                        | rec13               | a                                    | APEC                                  | ++                         | g      | a    | a   | g        | a       | a    | a      | a    | a         | a  | g        | a      | a     | a      | a   | a       | a    | a        | a       | a         | a       | a        | a         |   |
| c                         | 2262248                 | t                    | 2211753                   | c                | 2121671               | s                 | APEC                        | rec13               | c                                    | APEC                                  | ++                         | c      | c    | c   | c        | c       | c    | c      | c    | c         | c  | c        | c      | c     | c      | c   | c       | c    | c        | c       | c         | c       | c        | c         |   |
| t                         | 2262269                 | a                    | 2211774                   | t                | 2121692               | s                 | APEC                        | rec13               | t                                    | APEC                                  | ++                         | t      | t    | t   | t        | a       | t    | t      | a    | t         | a  | t        | t      | a     | t      | t   | t       | t    | t        | t       | t         | t       | t        | t         |   |
| g                         | 2262272                 | a                    | 2211777                   | g                | 2121695               | s                 | APEC                        | rec13               | g                                    | APEC                                  | ++                         | g      | g    | g   | g        | a       | g    | a      | g    | a         | g  | a        | g      | a     | g      | a   | g       | a    | g        | a       | g         | a       | g        | a         | g |
| c                         | 2262323                 | t                    | 2211828                   | c                | 2121746               | s                 | APEC                        | rec13               | c                                    | APEC                                  | +++                        | c      | c    | c   | c        | c       | c    | c      | c    | c         | c  | c        | c      | c     | c      | c   | c       | c    | c        | c       | c         | c       | c        | c         |   |
| c                         | 2262356                 | t                    | 2211861                   | c                | 2121779               | s                 | APEC                        | rec13               | c                                    | APEC                                  | +++                        | c      | c    | c   | c        | c       | c    | c      | c    | c         | c  | c        | c      | c     | c      | c   | c       | c    | c        | c       | c         | c       | c        | c         |   |
| t                         | 2262429                 | a                    | 2211934                   | t                | 2121852               | ns                | APEC                        | rec13               | t                                    | APEC                                  | +++                        | t      | t    | t   | t        | t       | t    | t      | t    | t         | t  | t        | t      | t     | t      | t   | t       | t    | t        | t       | t         | t       | t        | t         |   |
| t                         | 2262437                 | a                    | 2211942                   | t                | 2121860               | s                 | APEC                        | rec13               | t                                    | APEC                                  | ++                         | t      | t    | t   | t        | t       | t    | t      | t    | t         | a  | t        | t      | t     | t      | t   | t       | t    | t        | t       | t         | t       | t        | t         |   |
| c                         | 2262446                 | t                    | 2211951                   | c                | 2121869               | s                 | APEC                        | rec13               | c                                    | APEC                                  | ++                         | c      | c    | c   | c        | c       | c    | c      | c    | c         | c  | c        | c      | c     | c      | c   | c       | c    | c        | c       | c         | c       | c        | c         |   |
| c                         | 2262467                 | a                    | 2211972                   | c                | 2121890               | s                 | APEC                        | rec13               | c                                    | APEC                                  | +++                        | c      | c    | c   | c        | c       | c    | c      | c    | c         | c  | c        | c      | c     | c      | c   | c       | c    | c        | c       | c         | c       | c        | c         |   |
| g                         | 2262515                 | a                    | 2212020                   | g                | 2121938               | s                 | APEC                        | rec13               | g                                    | APEC                                  | ++                         | g      | g    | g   | g        | g       | g    | g      | g    | g         | g  | a        | g      | g     | g      | g   | g       | g    | g        | g       | g         | g       | g        | g         | g |
| g                         | 2262982                 | a                    | 2212487                   | g                | 2122405               | ns                | APEC                        | rec13               | g                                    | APEC                                  | +++                        | g      | g    | g   | g        | g       | g    | g      | g    | g         | g  | g        | g      | g     | g      | g   | g       | g    | g        | g       | g         | g       | g        | g         | g |
| c                         | 2263031                 | t                    | 2212536                   | c                | 2122454               | s                 | APEC                        | rec13               | c                                    | APEC                                  | ++                         | c      | t    | c   | c        | c       | c    | c      | c    | c         | t  | c        | c      | c     | c      | c   | c       | c    | c        | c       | c         | c       | c        | c         |   |
| c                         | 2263148                 | t                    | 2212653                   | c                | 2122571               | s                 | APEC                        | rec13               | c                                    | APEC                                  | ++                         | c      | c    | c   | t        | t       | t    | t      | t    | t         | t  | c        | c      | c     | c      | c   | c       | c    | c        | c       | c         | c       | c        | c         |   |
| g                         | 2263175                 | a                    | 2212680                   | g                | 2122598               | s                 | APEC                        | rec13               | a                                    | 2                                     | -                          | a      | g    | a   | g        | a       | a    | g      | a    | g         | a  | a        | a      | a     | a      | a   | a       | a    | a        | a       | a         | a       | a        | a         |   |
| t                         | 2263229                 | c                    | 2212734                   | t                | 2122652               | s                 | APEC                        | rec13               | c                                    | 2                                     | -                          | c      | t    | c   | t        | t       | c    | t      | t    | t         | t  | t        | t      | t     | t      | t   | t       | t    | t        | t       | t         | t       | t        | t         |   |
| a                         | 2264043                 | g                    | 2213548                   | a                | 2123466               | s                 | APEC                        | rec13               | g                                    | 2                                     | -                          | g      | a    | g   | g        | g       | g    | g      | g    | a         | a  | g        | a      | a     | a      | a   | a       | a    | a        | a       | a         | a       | a        | a         |   |
| t                         | 2264250                 | c                    | 2213755                   | t                | 2123673               | s                 | APEC                        | rec13               | t                                    | APEC                                  | ++                         | t      | t    | t   | t        | c       | t    | c      | t    | c         | t  | c        | t      | t     | t      | t   | t       | t    | t        | t       | t         | t       | t        | t         |   |
| g                         | 2264319                 | a                    | 2213824                   | g                | 2123742               | s                 | APEC                        | rec13               | g                                    | APEC                                  | ++                         | g      | g    | g   | a        | a       | g    | a      | g    | a         | a  | g        | g      | g     | g      | g   | g       | g    | g        | g       | g         | g       | g        | g         | g |
| g                         | 2264334                 | a                    | 2213839                   | g                | 2123757               | s                 | APEC                        | rec13               | g                                    | APEC                                  | ++                         | g      | g    | g   | a        | a       | g    | a      | g    | a         | a  | a        | g      | g     | g      | g   | g       | g    | g        | g       | g         | g       | g        | g         | g |
| g                         | 2264349                 | a                    | 2213854                   | g                | 2123772               | s                 | APEC                        | rec13               | a                                    | 2                                     | -                          | a      | a    | g   | a        | g       | g    | g      | g    | g         | g  | a        | g      | g     | g      | g   | g       | g    | g        | g       | g         | g       | g        | g         | g |
| g                         | 2264508                 | c                    | 2214013                   | g                | 2123931               | s                 | APEC                        | rec13               | c                                    | 2                                     | -                          | g      | c    | c   | g        | c       | g    | g      | g    | g         | g  | c        | c      | c     | c      | c   | c       | c    | c        | c       | c         | c       | c        | c         |   |
| c                         | 2264592                 | g                    | 2214097                   | c                | 2124015               | s                 | APEC                        | rec13               | c                                    | APEC                                  | ++                         | c      | g    | c   | c        | c       | g    | g      | g    | g         | g  | a        | g      | g     | g      | g   | g       | g    | g        | g       | g         | g       | g        | g         | g |
| c                         | 2264616                 | t                    | 2214121                   | c                | 2124039               | s                 | APEC                        | rec13               | c                                    | APEC                                  | ++                         | t      | c    | c   | c        | t       | t    | c      | c    | t         | c  | c        | c      | t     | c      | c   | c       | t    | t        | t       | t         | t       | t        | t         |   |
| g                         |                         |                      |                           |                  |                       |                   |                             |                     |                                      |                                       |                            |        |      |     |          |         |      |        |      |           |    |          |        |       |        |     |         |      |          |         |           |         |          |           |   |

Table S8. Allocation of recombinational SNPs to lineages by virtual outgroup analysis<sup>a</sup>

| ExPEC genome site details |                         |                      |                           |                  |                       |                   |                             |                     |                                      | Outgroup Strains Details <sup>5</sup> |                            |        |      |     |          |         |       |        |      |                                |    |          |        |       |        |      |         |      |          |         |           |         |          |           |   |   |
|---------------------------|-------------------------|----------------------|---------------------------|------------------|-----------------------|-------------------|-----------------------------|---------------------|--------------------------------------|---------------------------------------|----------------------------|--------|------|-----|----------|---------|-------|--------|------|--------------------------------|----|----------|--------|-------|--------|------|---------|------|----------|---------|-----------|---------|----------|-----------|---|---|
|                           |                         |                      |                           |                  |                       |                   |                             |                     |                                      | Recombinant segment                   |                            |        |      |     |          |         |       |        |      | Outgroup Analysis <sup>6</sup> |    |          |        |       |        |      |         |      |          |         |           |         |          |           |   |   |
|                           |                         |                      |                           |                  |                       |                   |                             |                     |                                      | Inferred ancestral base <sup>9</sup>  |                            |        |      |     |          |         |       |        |      | Support level <sup>7</sup>     |    |          |        |       |        |      |         |      |          |         |           |         |          |           |   |   |
|                           |                         |                      |                           |                  |                       |                   |                             |                     |                                      | CF1073                                |                            |        |      |     |          |         |       |        |      | ED1a                           |    |          |        |       |        |      |         |      |          |         |           |         |          |           |   |   |
|                           |                         |                      |                           |                  |                       |                   |                             |                     |                                      | 536                                   |                            |        |      |     |          |         |       |        |      | E2348/69                       |    |          |        |       |        |      |         |      |          |         |           |         |          |           |   |   |
|                           |                         |                      |                           |                  |                       |                   |                             |                     |                                      | SMS 3-5                               |                            |        |      |     |          |         |       |        |      | IAI39                          |    |          |        |       |        |      |         |      |          |         |           |         |          |           |   |   |
|                           |                         |                      |                           |                  |                       |                   |                             |                     |                                      | UMN026                                |                            |        |      |     |          |         |       |        |      | K-12                           |    |          |        |       |        |      |         |      |          |         |           |         |          |           |   |   |
|                           |                         |                      |                           |                  |                       |                   |                             |                     |                                      | ATCC 8739                             |                            |        |      |     |          |         |       |        |      | HS                             |    |          |        |       |        |      |         |      |          |         |           |         |          |           |   |   |
|                           |                         |                      |                           |                  |                       |                   |                             |                     |                                      | D1 Sd197                              |                            |        |      |     |          |         |       |        |      | CB9615                         |    |          |        |       |        |      |         |      |          |         |           |         |          |           |   |   |
|                           |                         |                      |                           |                  |                       |                   |                             |                     |                                      | Sakai                                 |                            |        |      |     |          |         |       |        |      | EDL933                         |    |          |        |       |        |      |         |      |          |         |           |         |          |           |   |   |
|                           |                         |                      |                           |                  |                       |                   |                             |                     |                                      | IAI1                                  |                            |        |      |     |          |         |       |        |      | E24377A                        |    |          |        |       |        |      |         |      |          |         |           |         |          |           |   |   |
|                           |                         |                      |                           |                  |                       |                   |                             |                     |                                      | SE11                                  |                            |        |      |     |          |         |       |        |      | SS Ss046                       |    |          |        |       |        |      |         |      |          |         |           |         |          |           |   |   |
|                           |                         |                      |                           |                  |                       |                   |                             |                     |                                      | F2a 301                               |                            |        |      |     |          |         |       |        |      | F2a 2457T                      |    |          |        |       |        |      |         |      |          |         |           |         |          |           |   |   |
|                           |                         |                      |                           |                  |                       |                   |                             |                     |                                      | F5 8401                               |                            |        |      |     |          |         |       |        |      | B4 Ss227                       |    |          |        |       |        |      |         |      |          |         |           |         |          |           |   |   |
|                           |                         |                      |                           |                  |                       |                   |                             |                     |                                      | B18 BS512                             |                            |        |      |     |          |         |       |        |      |                                |    |          |        |       |        |      |         |      |          |         |           |         |          |           |   |   |
| UT189 <sup>b</sup>        | UT189 site <sup>c</sup> | APEC 01 <sup>b</sup> | APEC 01 site <sup>c</sup> | S88 <sup>b</sup> | S88 site <sup>c</sup> | type <sup>d</sup> | Event Lineage <sup>ef</sup> | Recombinant segment | Inferred ancestral base <sup>9</sup> | Outgroup Analysis <sup>6</sup>        | Support level <sup>7</sup> | CF1073 | ED1a | 536 | E2348/69 | SMS 3-5 | IAI39 | UMN026 | K-12 | ATCC 8739                      | HS | D1 Sd197 | CB9615 | Sakai | EDL933 | IAI1 | E24377A | SE11 | SS Ss046 | F2a 301 | F2a 2457T | F5 8401 | B4 Ss227 | B18 BS512 |   |   |
| t                         | 2111457                 | t                    | 2132217                   | a                | 2039887               | ns                | S88                         | rec14               | t                                    | S88                                   | ++                         | t      | t    | t   | t        | t       | t     | t      | t    | t                              | t  | t        | a      | a     | a      | a    | t       | t    | t        | t       | t         | t       | t        | t         | t |   |
| t                         | 2111480                 | t                    | 2132240                   | a                | 2039910               | ns                | S88                         | rec14               | t                                    | S88                                   | ++                         | t      | g    | g   | g        | g       | g     | g      | g    | g                              | g  | t        | a      | a     | a      | a    | t       | t    | t        | t       | t         | t       | t        | t         | t |   |
| g                         | 2111673                 | g                    | 2132433                   | c                | 2040103               | s                 | S88                         | rec14               | g                                    | S88                                   | ++                         | g      | c    | c   | c        | c       | c     | c      | c    | c                              | c  | g        | a      | a     | a      | a    | c       | c    | c        | c       | c         | c       | c        | c         | c |   |
| c                         | 2111694                 | c                    | 2132454                   | a                | 2040124               | s                 | S88                         | rec14               | c                                    | S88                                   | ++                         | c      | c    | c   | c        | c       | c     | c      | c    | c                              | c  | a        | a      | a     | a      | a    | c       | c    | c        | c       | c         | c       | c        | c         | c |   |
| c                         | 2111748                 | c                    | 2132508                   | t                | 2040178               | s                 | S88                         | rec14               | c                                    | S88                                   | ++                         | c      | t    | c   | t        | c       | c     | c      | c    | c                              | c  | t        | t      | t     | t      | t    | t       | t    | t        | t       | t         | t       | t        | t         | t |   |
| g                         | 2111832                 | g                    | 2132592                   | a                | 2040262               | s                 | S88                         | rec14               | g                                    | S88                                   | ++                         | g      | g    | g   | g        | g       | g     | g      | a    | g                              | a  | g        | a      | a     | a      | a    | g       | g    | g        | g       | g         | g       | g        | g         | g | g |
| t                         | 2111907                 | t                    | 2132667                   | c                | 2040337               | s                 | S88                         | rec14               | t                                    | S88                                   | ++                         | t      | c    | t   | t        | c       | c     | c      | c    | c                              | c  | c        | c      | c     | c      | c    | c       | c    | c        | c       | c         | c       | c        | c         | c | c |
| c                         | 2111918                 | c                    | 2132678                   | t                | 2040348               | ns                | S88                         | rec14               | c                                    | S88                                   | ++                         | c      | c    | c   | c        | c       | c     | c      | c    | c                              | c  | c        | c      | c     | c      | c    | c       | c    | c        | c       | c         | c       | c        | c         | c | c |
| g                         | 2111929                 | g                    | 2132689                   | a                | 2040359               | ns                | S88                         | rec14               | g                                    | S88                                   | ++                         | g      | a    | g   | g        | a       | g     | a      | a    | a                              | a  | a        | a      | a     | a      | a    | a       | a    | a        | a       | a         | a       | a        | a         | a | a |
| g                         | 2111961                 | g                    | 2132721                   | a                | 2040391               | s                 | S88                         | rec14               | g                                    | S88                                   | ++                         | g      | a    | g   | g        | a       | g     | a      | a    | a                              | a  | a        | a      | a     | a      | a    | a       | a    | a        | a       | a         | a       | a        | a         | a | a |
| a                         | 2111994                 | a                    | 2132754                   | g                | 2040424               | s                 | S88                         | rec14               | a                                    | S88                                   | ++                         | a      | g    | a   | g        | a       | g     | a      | a    | a                              | a  | g        | g      | g     | g      | g    | g       | g    | g        | g       | g         | g       | g        | g         | g | g |
| a                         | 2112058                 | a                    | 2132818                   | t                | 2040488               | ns                | S88                         | rec14               | a                                    | S88                                   | ++                         | a      | t    | a   | a        | t       | a     | a      | a    | t                              | a  | a        | a      | t     | t      | t    | t       | a    | t        | t       | a         | a       | a        | a         | a | a |
| g                         | 2112156                 | g                    | 2132916                   | a                | 2040586               | s                 | S88                         | rec14               | g                                    | S88                                   | ++                         | g      | g    | g   | g        | g       | g     | g      | g    | g                              | g  | g        | a      | a     | a      | a    | a       | g    | g        | g       | g         | g       | g        | g         | g | g |
| t                         | 2112162                 | t                    | 2132922                   | a                | 2040592               | ns                | S88                         | rec14               | t                                    | S88                                   | ++                         | t      | t    | t   | t        | t       | t     | t      | t    | t                              | t  | t        | a      | a     | a      | a    | t       | t    | t        | t       | t         |         |          |           |   |   |

Table S8. Allocation of recombinational SNPs to lineages by virtual outgroup analysis<sup>a</sup>

| ExPEC genome site details |                         |                      |                           |                  |                       |                   |                             |                     |                                      | Outgroup Strains Details <sup>1</sup> |                            |        |      |     |          |         |      |        |      |           |    |          |        |       |        |     |         |      |          |         |           |         |          |           |   |   |   |
|---------------------------|-------------------------|----------------------|---------------------------|------------------|-----------------------|-------------------|-----------------------------|---------------------|--------------------------------------|---------------------------------------|----------------------------|--------|------|-----|----------|---------|------|--------|------|-----------|----|----------|--------|-------|--------|-----|---------|------|----------|---------|-----------|---------|----------|-----------|---|---|---|
| UT189 <sup>b</sup>        | UT189 site <sup>c</sup> | APEC 01 <sup>b</sup> | APEC 01 site <sup>c</sup> | S88 <sup>b</sup> | S88 site <sup>c</sup> | type <sup>d</sup> | Event Lineage <sup>ef</sup> | Recombinant segment | Inferred ancestral base <sup>g</sup> | Outgroup Analysis <sup>e</sup>        | Support level <sup>h</sup> | CFT073 | ED1a | 536 | E2348/69 | SMS 3-5 | IA39 | UMN026 | K-12 | ATCC 8739 | HS | D1 Sd197 | CB9615 | Sakai | EDL933 | IA1 | E24377A | SE11 | SS Sd046 | F2a 301 | F2a 2457T | F5 8401 | B4 Sd227 | B18 BS512 |   |   |   |
| c                         | 2256069                 | -                    | 2152225                   | g                | 2115491               | ns                | S88                         | rec14               | c                                    | S88                                   | ++                         | c      | g    | c   |          |         |      |        | g    | g         | g  |          |        | g     | g      | g   | g       | g    | g        | g       | g         | g       | g        | g         |   |   |   |
| c                         | 2256070                 | -                    | 2152225                   | t                | 2115492               | ns                | S88                         | rec14               | c                                    | S88                                   | ++                         | c      | t    | c   |          |         |      |        | t    | t         | t  |          |        | t     | t      | t   | t       | t    | t        | t       | t         | t       | t        | t         |   |   |   |
| c                         | 2256075                 | -                    | 2152225                   | t                | 2115497               | ns                | S88                         | rec14               | c                                    | S88                                   | ++                         | c      | t    | c   |          |         |      |        | c    | c         | t  |          |        | t     | t      | c   | t       | t    | c        | c       | c         | c       | t        | c         |   |   |   |
| c                         | 2256094                 | -                    | 2152225                   | t                | 2115516               | ns                | S88                         | rec14               | c                                    | S88                                   | ++                         | c      | c    | c   |          |         |      |        | c    | c         | t  |          |        | t     | t      | c   | t       | c    | c        | c       | c         | t       | c        | c         |   |   |   |
| t                         | 2256098                 | -                    | 2152225                   | c                | 2115520               | s                 | S88                         | rec14               | t                                    | S88                                   | ++                         | t      | t    | t   |          |         |      |        | t    | t         | c  |          |        | c     | c      | t   | c       | t    | t        | t       | t         | t       | c        | t         | t |   |   |
| c                         | 2256112                 | -                    | 2152225                   | t                | 2115534               | ns                | S88                         | rec14               | c                                    | S88                                   | ++                         | c      | t    | c   | c        | c       | c    | c      | c    | t         | t  |          | c      | t     | t      | t   | t       | t    | t        | t       | t         | t       | t        | t         | t |   |   |
| c                         | 2256129                 | -                    | 2152225                   | a                | 2115551               | nc                | S88                         | rec14               | c                                    | S88                                   | ++                         | c      | a    | c   | c        | c       | c    | c      | a    | a         | a  |          | c      | a     | a      | a   | a       | a    | a        | a       | a         | a       | a        | a         | a |   |   |
| t                         | 2256131                 | -                    | 2152225                   | c                | 2115553               | nc                | S88                         | rec14               | t                                    | S88                                   | ++                         | t      | c    | t   | t        | t       | t    | c      | c    | c         |    |          | t      | c     | c      | t   | c       | c    |          |         | t         | t       | t        | c         | t |   |   |
| g                         | 2256310                 | -                    | 2152225                   | a                | 2115732               | ns                | S88                         | rec14               | g                                    | S88                                   | ++                         | g      | g    | g   | g        | g       | g    | g      | g    | a         |    | g        | a      | a     | a      | a   | g       | g    | g        | g       | g         | g       | g        | g         | a | g |   |
| g                         | 2256390                 | -                    | 2152225                   | a                | 2115812               | s                 | S88                         | rec14               | g                                    | S88                                   | ++                         | g      | a    | g   | a        | g       | g    | g      | a    | a         |    | g        | a      | a     | a      | a   | a       | a    | a        | a       | a         | a       | a        | a         | a | a |   |
| c                         | 2256393                 | -                    | 2152225                   | a                | 2115815               | s                 | S88                         | rec14               | c                                    | S88                                   | ++                         | c      | a    | c   | a        | c       | c    | c      | a    | a         |    | c        | a      | a     | a      | a   | a       | a    | a        | a       | a         | a       | a        | a         | a | a |   |
| a                         | 2256414                 | -                    | 2152225                   | g                | 2115836               | s                 | S88                         | rec14               | a                                    | S88                                   | ++                         | a      | g    | a   | g        | a       | a    | a      | a    | g         | g  |          | g      | g     | g      | g   | g       | g    | g        | g       | g         | g       | g        | g         | g | g |   |
| g                         | 2256417                 | -                    | 2152225                   | a                | 2115839               | s                 | S88                         | rec14               | g                                    | S88                                   | ++                         | g      | a    | g   | a        | g       | g    | g      | a    | a         |    | a        | a      | a     | a      | a   | a       | a    | a        | a       | a         | a       | a        | a         | a | a |   |
| g                         | 2256519                 | -                    | 2152225                   | t                | 2115941               | s                 | S88                         | rec14               | g                                    | S88                                   | ++                         | g      | t    | g   | t        | g       | g    | g      | t    | g         |    | g        | t      | t     | t      | g   | t       | t    | t        | t       | t         | t       | t        | g         | g | g |   |
| g                         | 2256597                 | -                    | 2152225                   | t                | 2116019               | s                 | S88                         | rec14               | g                                    | S88                                   | ++                         | g      | c    | g   | g        | t       | t    | t      | g    | g         |    | t        | g      | g     | g      | g   | g       | g    | g        | g       | g         | g       | g        | g         | g | g |   |
| c                         | 2256609                 | -                    | 2152225                   | a                | 2116031               | s                 | S88                         | rec14               | c                                    | S88                                   | ++                         | c      | c    | c   | a        | c       | c    | c      | a    | a         |    | c        | a      | a     | a      | a   | a       | a    | a        | a       | a         | a       | a        | a         | a | c |   |
| g                         | 2256777                 | -                    | 2152225                   | a                | 2116199               | s                 | S88                         | rec14               | g                                    | S88                                   | ++                         | g      | g    | g   | a        | g       | g    | g      | a    | g         |    | g        | a      | a     | g      | g   | g       | g    | g        | g       | g         | g       | g        | g         | g | g |   |
| g                         | 2256813                 | -                    | 2152225                   | a                | 2116235               | s                 | S88                         | rec14               | g                                    | S88                                   | ++                         | g      | g    | g   | a        | g       | g    | g      | g    | a         |    | g        | a      | a     | g      | a   | g       | g    | g        | g       | g         | g       | g        | g         | a | a |   |
| g                         | 2256933                 | -                    | 2152225                   | a                | 2116355               | s                 | S88                         | rec14               | g                                    | S88                                   | ++                         | g      | g    | g   | a        | a       | g    | g      | a    | g         |    | g        | a      | a     | g      | g   | g       | g    | g        | g       | g         | g       | g        | g         | g | g |   |
| c                         | 2256993                 | -                    | 2152225                   | a                | 2116415               | s                 | S88                         | rec14               | c                                    | S88                                   | ++                         | c      | c    | c   | a        | c       | c    | c      | c    | c         |    | c        | a      | a     | c      | a   | c       | c    | c        | c       | c         | c       | c        | c         | c | c |   |
| c                         | 2256996                 | -                    | 2152225                   | a                | 2116418               | s                 | S88                         | rec14               | c                                    | S88                                   | ++                         | c      | c    | c   | a        | c       | c    | c      | c    | c         |    | c        | a      | a     | c      | t   | c       | a    | a        | a       | a         | a       | a        | a         | c | c |   |
| g                         | 2257020                 | -                    | 2152225                   | a                | 2116442               | s                 | S88                         | rec14               | g                                    | S88                                   | ++++                       | g      | g    | g   | g        | g       | g    | g      | g    | g         |    | a        | g      | g     | g      | g   | g       | g    | g        | g       | g         | g       | g        | g         | g | g |   |
| c                         | 2257065                 | -                    | 2152225                   | t                | 2116487               | s                 | S88                         | rec14               | c                                    | S88                                   | ++                         | c      | t    | c   | c        | t       | t    | t      | c    | t         |    | t        | c      | c     | t      | g   | t       | c    | c        | c       | c         | c       | c        | t         | t | t |   |
| a                         | 2257092                 | -                    | 2152225                   | g                | 2116514               | s                 | S88                         | rec14               | a                                    | S88                                   | ++                         | a      | g    | a   | g        | g       | g    | g      | g    | g         |    | g        | g      | g     | g      | g   | g       | g    | g        | g       | g         | g       | g        | g         | g | g |   |
| t                         | 2257134                 | -                    | 2152225                   | c                | 2116556               | s                 | S88                         | rec14               | t                                    | S88                                   | ++                         | t      | c    | t   | t        | c       | c    | c      | c    | c         |    | c        | c      | t     | c      | c   | c       | c    | c        | c       | c         | c       | c        | c         | c | c |   |
| t                         | 2257203                 | -                    | 2152225                   | c                | 2116625               | s                 | S88                         | rec14               | t                                    | S88                                   | ++                         | t      | c    | t   | c        | t       | t    | c      | t    | c         |    | c        | t      | t     | t      | c   | c       | c    | c        | c       | c         | c       | c        | c         | c | c |   |
| a                         | 2257295                 | -                    | 2152225                   | g                | 2116717               | s                 | S88                         | rec14               | a                                    | S88                                   | ++                         | a      | g    | a   | g        | g       | g    | g      | g    | g         |    | g        | g      | g     | g      | g   | g       | g    | g        | g       | g         | g       | g        | g         | g | a |   |
| g                         | 2257305                 | -                    | 2152225                   | a                | 2116727               | s                 | S88                         | rec14               | g                                    | S88                                   | ++                         | g      | a    | g   | a        | a       | g    | a      | a    | g         |    | a        | a      | a     | a      | a   | a       | a    | a        | a       | a         | a       | a        | a         | a | a |   |
| a                         | 2257309                 | -                    | 2152225                   | g                | 2116731               | ns                | S88                         | rec14               | a                                    | S88                                   | ++                         | a      | g    | a   | g        | a       | a    | a      | a    | a         |    | a        | a      | a     | a      | a   | a       | a    | a        | a       | a         | a       | a        | a         | a | a |   |
| a                         | 2257356                 | -                    | 2152225                   | g                | 2116778               | s                 | S88                         | rec14               | a                                    | S88                                   | ++                         | a      | g    | a   | g        | a       | g    | a      | a    | g         |    | a        | a      | a     | g      | g   | g       | g    | g        | g       | g         | g       | g        | g         | g | g | g |
| c                         | 2257530                 | -                    | 2152225                   | t                | 2116952               | s                 | S88                         | rec14               | c                                    | S88                                   | ++                         | c      | t    | c   | c        | c       | c    | c      | c    | c         |    | c        | c      | c     | t      | t   | g       | c    | c        | c       | c         | c       | c        | c         | c | c |   |
| g                         | 2257560                 | -                    | 2152225                   | a                | 2116982               | s                 | S88                         | rec14               | g                                    | S88                                   | ++                         | g      | g    | g   | g        | g       | g    | g      | g    | g         |    | g        | g      | g     | a      | a   | g       | g    | g        | g       | g         | g       | g        | g         | g | g |   |
| c                         | 2257738                 | -                    | 2152225                   | t                | 2117160               | s                 | S88                         | rec14               | c                                    | S88                                   | ++                         | c      | t    | c   | t        | c       | c    | c      | c    | c         |    | c        | c      | c     | c      | c   | t       | c    | c        | c       | c         | c       | c        | c         | c | c |   |
| t                         | 2257798                 | -                    | 2152225                   | c                | 2117220               | s                 | S88                         | rec14               | t                                    | S88                                   | ++                         | t      | c    | t   | c        | c       | t    | c      | c    | t         |    | c        | c      | c     | c      | t   | c       | t    | t        | t       | t         | t       | t        | t         | t | t |   |
| c                         | 2257861                 | -                    | 2152225                   | t                | 2117283               | s                 | S88                         | rec14               | c                                    | S88                                   | ++                         | c      | t    | c   | c        | c       | t    | c      | c    | c         |    | c        | c      | c     | c      | c   | c       | c    | c        | c       | c         | c       | c        | c         | c | c |   |
| c                         | 2257867                 | -                    | 2152225                   | t                | 2117289               | s                 | S88                         | rec14               | c                                    | S88                                   | ++                         | c      | t    | c   | c        | t       | t    | c      | t    | c         |    | c        | t      | t     | t      | t   | t       | t    | t        | t       | t         | t       | t        | t         | t | t |   |
| a                         | 2257917                 | -                    | 2152225                   | g                | 2117339               | s                 | S88                         | rec14               | a                                    | S88                                   | ++                         | a      | a    | a   | a        | a       | a    | a      | a    | a         |    | a        | a      | a     | g      | g   | a       | a    | a        | a       | a         | a       | a        | a         | a | a |   |
| g                         | 2258062                 | -                    | 2152225                   | a                | 2117484               | s                 | S88                         | rec14               | g                                    | S88                                   | ++                         | g      | a    | a   | a        | g       | g    | g      | g    | a         |    | g        | g      | g     | a      | a   | g       | a    | a        | a       | a         | a       | a        | a         | a | a |   |
| c                         | 2258092                 | -                    | 2152225                   | t                | 2117514               | s                 | S88                         | rec14               | c                                    | S88                                   | ++                         | c      | a    | c   | t        | t       | c    | a      | t    | t         |    | a        | a      | a     | t      | a   | t       | t    | t        | t       | t         | t       | t        | t         | a | a |   |
| g                         | 2258098                 | -                    | 2152225                   | a                | 2117520               | s                 | S88                         | rec14               | g                                    | S88                                   | ++                         | g      | a    | g   | a        | a       | a    | a      | a    | a         |    | a        | a      | a     | a      | a   | a       | a    | a        | a       | a         | a       | a        | a         | a | a |   |
| c                         | 2258101                 | -                    | 2152225                   | g                | 2117523               | s                 | S88                         | rec14               | c                                    | S88                                   | ++                         | c      | g    | c   | g        | g       | g    | g      | g    | g         |    | g        | g      | g     | g      | g   | g       | g    | g        | g       | g         | g       | g        | g         | g | g |   |
| g                         | 2258122                 | -                    | 2152225                   | a                | 2117544               | s                 | S88                         | rec14               | g                                    | S88                                   | ++                         | g      | g    | g   | a        | a       | a    | g      | a    | a         |    | g        | g      | g     | a      | a   | a       | a    | a        | a       | a         | a       | a        | a         | a | a |   |
| g                         | 2258137                 | -                    | 2152225                   | t                | 2117559               | s                 | S88                         | rec14               | g                                    | S88                                   | ++++                       | g      | g    | g   | g        | a       | g    | g      | g    | g         |    | g        | g      | g     | g      | g   | g       | g    | g        | g       | g         | g       | g        | g         | g | g |   |
| t                         | 2258179                 | -                    | 2152225                   | c                | 2117601               | s                 | S88                         | rec14               | t                                    | S88                                   | ++                         | t      | c    | t   | c        | c       | c    | c      | c    | c         |    | c        | c      | c     | c      | c   | c       | c    | c        | c       | c         | c       | c        | c         | c | c |   |
| g                         | 2258188                 | -                    | 2152225                   | t                | 2117610               | s                 | S88                         | rec14               | g                                    | S88                                   | ++                         | t      | g    | g   | g        | t       | t    | g      | g    | t         |    | g        | g      | g     | t      | t   | g       | t    | t        | t       | t         | t       | t        | t         | t | t |   |
| g                         | 2258259                 | -                    | 2152225                   | t                | 2117681               | ns                | S88                         | rec14               | g                                    | S88                                   | ++                         | g      | g    | t   | g        | t       | t    | t      | g    | g         |    | t        | g      | g     | g      | g   | g       | g    | g        | g       | g         | g       | g        | g         | g | g |   |
| t                         | 2258263                 | -                    | 2152225                   | g                | 2117685               | s                 | S88                         | rec14               | t                                    | S88                                   | ++                         | t      | t    | g   | t        | t       | t    | g      | t    | t         |    | t        | t      | t     | t      | t   | t       | t    | t        | t       | t         | t       | t        | t         | t | t |   |
| g                         | 2258269                 | -                    | 2152225                   | a                | 2117691               | s                 | S88                         | rec14               | g                                    | S88                                   | ++++                       | g      | g    | g   | g        | g       | g    | g      | g    | g         |    | a        | g      | g     | g      | g   | g       | g    | g        | g       | g         | g       | g        | g         | g | g |   |
| g                         | 2258275                 | -                    | 2152225                   | a                | 2117697               | s                 | S88                         | rec14               | g                                    | S88                                   | ++++                       | g      | g    | g   | g        | g       | g    | g      | g    | g         |    | a        | g      | g     | g      | g   | g       | g    | g        | g       | g         | g       | g        | g         | g | g |   |
| g                         | 2258287                 | -                    | 2152225                   | a                | 2117709               | s                 | S88                         | rec14               | g                                    | S88                                   | ++++                       | g      | g    | g   | g        | g       | g    | g      | g    | g         |    | g        | g      | g     | g      | g   | g       | g    | g        | g       | g         | g       | g        | g         | g | g |   |
| c                         | 2258368                 | -                    | 2152225                   | t                | 2117790               | s                 | S88                         | rec14               | c                                    | S88                                   | ++                         | c      | t    | c   | t        | c       | t    | c      | t    | t         |    | c        | t      | t     | t      | t   | t       | t    | t        | t       | t         | t       | t        | t         | t | t |   |
| a                         | 2258410                 | -                    | 2152225                   | g                | 2117832               | s                 | S88                         | rec14               | a                                    | S88                                   |                            |        |      |     |          |         |      |        |      |           |    |          |        |       |        |     |         |      |          |         |           |         |          |           |   |   |   |

Table S8. Allocation of recombinational SNPs to lineages by virtual outgroup analysis<sup>a</sup>

| ExPEC genome site details |                         |                      |                           |                  |                       |                   |                             |                     |                                      | Outgroup Strains Details <sup>1</sup> |                            |        |      |     |          |         |      |        |      |           |    |          |        |       |        |     |         |      |          |         |           |         |          |           |   |
|---------------------------|-------------------------|----------------------|---------------------------|------------------|-----------------------|-------------------|-----------------------------|---------------------|--------------------------------------|---------------------------------------|----------------------------|--------|------|-----|----------|---------|------|--------|------|-----------|----|----------|--------|-------|--------|-----|---------|------|----------|---------|-----------|---------|----------|-----------|---|
| UT189 <sup>b</sup>        | UT189 site <sup>c</sup> | APEC 01 <sup>b</sup> | APEC 01 site <sup>c</sup> | S88 <sup>b</sup> | S88 site <sup>c</sup> | type <sup>d</sup> | Event Lineage <sup>ef</sup> | Recombinant segment | Inferred ancestral base <sup>g</sup> | Outgroup Analysis <sup>h</sup>        | Support level <sup>h</sup> | CFT073 | ED1a | 536 | E2348/69 | SMS 3-5 | IA39 | UMN026 | K-12 | ATCC 8739 | HS | D1 Sd197 | CB9615 | Sakai | EDL933 | IA1 | E24377A | SE11 | SS Sd046 | F2a 301 | F2a 2457T | F5 8401 | B4 Sd227 | B18 BS512 |   |
| a                         | 2260431                 | -                    | 2152225                   | g                | 2119854               | s                 | S88                         | rec14               | a                                    | S88                                   | ++                         | a      | a    | a   | g        | g       | a    | g      | a    | a         | a  | a        | a      | a     | a      | g   | g       | g    | g        | g       | g         | g       | g        | g         |   |
| t                         | 2260502                 | -                    | 2152225                   | c                | 2119925               | ns                | S88                         | rec14               | t                                    | S88                                   | ++                         | t      | c    | t   | c        | c       | c    | c      | c    | c         | c  | c        | c      | c     | c      | c   | c       | c    | c        | c       | c         | c       | c        | c         |   |
| c                         | 2260560                 | -                    | 2152225                   | t                | 2119983               | s                 | S88                         | rec14               | c                                    | S88                                   | ++                         | c      | c    | c   | c        | c       | c    | c      | c    | c         | c  | c        | c      | c     | c      | c   | c       | c    | c        | c       | c         | c       | c        | c         |   |
| g                         | 2260609                 | -                    | 2152225                   | t                | 2120032               | ns                | S88                         | rec14               | g                                    | S88                                   | ++++                       | g      | g    | g   | g        | g       | g    | g      | g    | g         | g  | g        | g      | g     | g      | g   | g       | g    | g        | g       | g         | g       | g        | g         |   |
| a                         | 2260689                 | t                    | 2210194                   | c                | 2120112               | s                 | S88                         | rec14               | c                                    | 2                                     | -                          | c      | c    | c   | c        | c       | c    | c      | c    | c         | c  | c        | c      | c     | c      | c   | c       | c    | c        | c       | c         | c       | c        | c         |   |
| a                         | 2260734                 | a                    | 2210239                   | g                | 2120157               | s                 | S88                         | rec14               | a                                    | S88                                   | ++                         | a      | a    | a   | g        | g       | g    | a      | a    | a         | g  |          | a      | g     | g      | g   | g       | g    | a        | g       | g         | g       | a        | g         |   |
| g                         | 2260797                 | g                    | 2210302                   | a                | 2120220               | s                 | S88                         | rec14               | g                                    | S88                                   | ++                         | g      | g    | g   | g        | g       | g    | a      | a    | a         | g  |          | g      | g     | a      | a   | a       | a    | a        | a       | a         | a       | a        | g         |   |
| g                         | 2260914                 | g                    | 2210419                   | a                | 2120337               | s                 | S88                         | rec14               | g                                    | S88                                   | ++++                       | g      | g    | g   | g        | g       | g    | g      | g    | g         | g  |          | g      | g     | g      | g   | g       | g    | g        | g       | g         | g       | g        | g         | g |
| c                         | 2260917                 | c                    | 2210422                   | t                | 2120340               | s                 | S88                         | rec14               | c                                    | S88                                   | ++++                       | c      | c    | c   | c        | c       | c    | c      | c    | c         | c  |          | c      | c     | c      | c   | c       | c    | c        | c       | c         | c       | c        | c         | c |
| g                         | 2260970                 | g                    | 2210475                   | t                | 2120393               | s                 | S88                         | rec14               | g                                    | S88                                   | ++++                       | g      | g    | g   | g        | g       | g    | g      | g    | g         | g  |          | g      | g     | g      | g   | g       | g    | g        | g       | g         | g       | g        | g         | g |
| g                         | 2261040                 | g                    | 2210545                   | t                | 2120463               | s                 | S88                         | rec14               | g                                    | S88                                   | ++                         | g      | g    | g   | g        | g       | g    | a      | a    | a         | g  |          | g      | g     | g      | g   | g       | g    | g        | g       | g         | g       | g        | g         | g |
| a                         | 2261118                 | a                    | 2210623                   | g                | 2120541               | s                 | S88                         | rec14               | a                                    | S88                                   | ++                         | a      | g    | a   | g        | a       | g    | a      | g    | a         | g  |          | a      | a     | a      | g   | g       | g    | a        | a       | a         | a       | a        | g         | a |
| a                         | 2261205                 | a                    | 2210710                   | t                | 2120628               | s                 | S88                         | rec14               | t                                    | 2                                     | -                          | t      | t    | a   | t        | t       | t    | a      | t    | t         | t  |          | t      | t     | t      | t   | t       | t    | t        | t       | t         | t       | t        | t         | a |
| g                         | 2261208                 | g                    | 2210713                   | a                | 2120631               | s                 | S88                         | rec14               | a                                    | 2                                     | -                          | a      | a    | g   | a        | a       | a    | g      | a    | g         | g  |          | a      | g     | g      | a   | a       | g    | g        | a       | a         | a       | a        | a         | g |
| a                         | 2261331                 | a                    | 2210836                   | g                | 2120754               | s                 | S88                         | rec14               | a                                    | S88                                   | ++                         | a      | g    | a   | g        | a       | a    | g      | g    | g         | g  |          | a      | g     | g      | a   | a       | a    | a        | a       | a         | a       | a        | a         | g |
| a                         | 2261376                 | a                    | 2210881                   | g                | 2120799               | s                 | S88                         | rec14               | a                                    | S88                                   | ++                         | g      | a    | a   | a        | a       | a    | a      | a    | a         | a  |          | a      | a     | a      | a   | a       | a    | a        | a       | a         | a       | a        | a         | a |
| a                         | 2261388                 | a                    | 2210893                   | g                | 2120811               | s                 | S88                         | rec14               | a                                    | S88                                   | ++                         | a      | a    | a   | a        | a       | a    | a      | a    | a         | g  |          | g      | a     | a      | a   | a       | a    | a        | a       | a         | a       | a        | a         | a |
| t                         | 2261543                 | t                    | 2211048                   | c                | 2120966               | ns                | S88                         | rec14               | t                                    | S88                                   | ++                         | t      | t    | t   | t        | c       | c    | t      | t    | t         | t  |          | t      | t     | t      | t   | t       | t    | t        | t       | t         | t       | t        | t         | t |
| t                         | 2261589                 | t                    | 2211094                   | a                | 2121012               | s                 | S88                         | rec14               | a                                    | 2                                     | -                          | t      | a    | a   | a        | t       | t    | a      | a    | a         | a  |          | t      | t     | t      | t   | a       | a    | a        | a       | a         | a       | a        | a         | a |
| a                         | 2261673                 | a                    | 2211178                   | g                | 2121096               | s                 | S88                         | rec14               | a                                    | S88                                   | ++                         | g      | a    | a   | a        | a       | a    | a      | a    | a         | a  |          | a      | g     | g      | a   | a       | a    | a        | a       | a         | a       | a        | a         | a |
| a                         | 2261949                 | a                    | 2211454                   | t                | 2121372               | ns                | S88                         | rec14               | a                                    | S88                                   | ++++                       | a      | a    | a   | a        | a       | a    | a      | a    | a         | a  |          | a      | a     | a      | a   | a       | a    | a        | a       | a         | a       | a        | a         | a |
| g                         | 2261979                 | g                    | 2211484                   | a                | 2121402               | s                 | S88                         | rec14               | g                                    | S88                                   | ++                         | g      | g    | g   | g        | g       | a    | g      | a    | g         | g  |          | g      | a     | a      | g   | g       | g    | g        | g       | g         | g       | g        | g         | g |
| c                         | 2262155                 | c                    | 2211660                   | t                | 2121578               | s                 | S88                         | rec14               | c                                    | S88                                   | ++++                       | c      | c    | c   | c        | c       | c    | c      | c    | c         | c  |          | c      | c     | c      | c   | c       | c    | c        | c       | c         | c       | c        | c         | c |
| g                         | 2262161                 | g                    | 2211666                   | a                | 2121584               | s                 | S88                         | rec14               | g                                    | S88                                   | ++++                       | g      | g    | g   | g        | g       | g    | g      | g    | g         | g  |          | g      | g     | g      | a   | g       | g    | g        | g       | g         | g       | g        | g         | g |
| g                         | 2262228                 | g                    | 2211733                   | c                | 2121651               | ns                | S88                         | rec14               | g                                    | S88                                   | ++++                       | g      | g    | g   | g        | g       | g    | g      | g    | g         | g  |          | g      | g     | g      | c   | g       | g    | g        | g       | g         | g       | g        | g         | g |
| g                         | 2262264                 | g                    | 2211769                   | a                | 2121687               | ns                | S88                         | rec14               | g                                    | S88                                   | ++++                       | g      | g    | g   | g        | g       | g    | g      | g    | g         | g  |          | g      | g     | g      | g   | g       | g    | g        | g       | g         | g       | g        | g         | g |
| t                         | 2262266                 | t                    | 2211771                   | c                | 2121689               | s                 | S88                         | rec14               | t                                    | S88                                   | ++                         | t      | t    | c   | a        | t       | t    | c      | t    | t         | t  |          | t      | t     | t      | c   | c       | c    | c        | c       | c         | c       | c        | c         | t |
| a                         | 2262419                 | a                    | 2211924                   | g                | 2121842               | s                 | S88                         | rec14               | a                                    | S88                                   | ++++                       | a      | a    | a   | a        | a       | a    | a      | g    | a         | a  |          | a      | a     | a      | a   | a       | a    | a        | a       | a         | a       | a        | a         | a |
| t                         | 2262458                 | t                    | 2211963                   | a                | 2121881               | ns                | S88                         | rec14               | t                                    | S88                                   | ++++                       | t      | t    | t   | t        | t       | t    | t      | t    | t         | t  |          | t      | t     | t      | t   | t       | t    | t        | t       | t         | t       | t        | t         | t |
| c                         | 2262522                 | c                    | 2212027                   | a                | 2121945               | ns                | S88                         | rec14               | c                                    | S88                                   | ++                         | c      | a    | c   | c        | c       | c    | c      | c    | c         | a  |          | c      | c     | c      | c   | c       | c    | c        | a       | a         | a       | a        | c         | c |
| c                         | 2262797                 | c                    | 2212302                   | t                | 2122220               | s                 | S88                         | rec14               | t                                    | 2                                     | -                          | t      | t    | t   | t        | c       | c    | t      | t    | c         | c  |          | t      | t     | t      | t   | t       | t    | t        | t       | t         | t       | t        | t         | t |
| a                         | 2262896                 | a                    | 2212401                   | g                | 2122319               | s                 | S88                         | rec14               | a                                    | S88                                   | ++                         | a      | a    | a   | a        | a       | a    | a      | a    | a         | a  |          | g      | g     | g      | a   | a       | a    | a        | a       | a         | a       | a        | a         | g |
| t                         | 2262950                 | t                    | 2212455                   | c                | 2122373               | s                 | S88                         | rec14               | c                                    | 2                                     | -                          | c      | c    | c   | t        | c       | c    | c      | c    | c         | c  |          | t      | t     | t      | c   | t       | c    | c        | t       | t         | t       | t        | t         | t |
| g                         | 2263067                 | g                    | 2212572                   | a                | 2122490               | s                 | S88                         | rec14               | g                                    | S88                                   | ++                         | g      | g    | g   | g        | g       | g    | g      | a    | g         | g  |          | g      | g     | g      | g   | a       | g    | g        | g       | g         | g       | g        | g         | g |
| c                         | 2263115                 | c                    | 2212620                   | g                | 2122538               | s                 | S88                         | rec14               | c                                    | S88                                   | ++                         | c      | g    | c   | g        | c       | g    | c      | g    | g         | c  |          | c      | c     | c      | g   | g       | g    | g        | g       | g         | g       | g        | g         | c |
| g                         | 2263121                 | g                    | 2212626                   | a                | 2122544               | s                 | S88                         | rec14               | g                                    | S88                                   | ++++                       | g      | g    | g   | g        | g       | g    | g      | g    | g         | g  |          | g      | g     | g      | g   | g       | g    | g        | g       | g         | g       | g        | g         | g |
| c                         | 2263178                 | c                    | 2212683                   | g                | 2122601               | s                 | S88                         | rec14               | c                                    | S88                                   | ++++                       | c      | c    | c   | c        | c       | c    | c      | c    | c         | c  |          | c      | c     | c      | c   | c       | c    | c        | c       | c         | c       | c        | c         | c |
| a                         | 2263362                 | a                    | 2212867                   | g                | 2122785               | s                 | S88                         | rec14               | a                                    | S88                                   | ++                         | a      | g    | a   | g        | a       | g    | a      | g    | g         | g  |          | g      | g     | g      | g   | g       | g    | g        | g       | g         | g       | g        | g         | g |
| c                         | 2263363                 | c                    | 2212868                   | t                | 2122786               | s                 | S88                         | rec14               | c                                    | S88                                   | ++                         | c      | t    | c   | c        | t       | c    | t      | c    | t         | c  |          | c      | c     | c      | c   | c       | c    | c        | c       | c         | c       | c        | c         | c |
| t                         | 2263400                 | t                    | 2212905                   | c                | 2122823               | ns                | S88                         | rec14               | t                                    | S88                                   | ++++                       | t      | t    | t   | t        | t       | t    | t      | t    | t         | t  |          | t      | t     | t      | t   | t       | t    | t        | t       | t         | t       | t        | t         | t |
| a                         | 2263717                 | a                    | 2213222                   | g                | 2123140               | s                 | S88                         | rec14               | a                                    | S88                                   | ++                         | t      | a    | t   | a        | t       | a    | a      | a    | a         | a  |          | a      | t     | t      | t   | g       | a    | g        | t       | t         | t       | t        | a         | a |
| g                         | 2263725                 | g                    | 2213230                   | a                | 2123148               | ns                | S88                         | rec14               | g                                    | S88                                   | ++++                       | g      | g    | g   | g        | g       | g    | g      | g    | g         | g  |          | g      | g     | g      | g   | g       | g    | g        | g       | g         | g       | g        | g         | g |
| a                         | 2263905                 | a                    | 2213410                   | g                | 2123328               | s                 | S88                         | rec14               | g                                    | 2                                     | -                          | a      | g    | a   | a        | a       | a    | a      | g    | g         | g  |          | g      | g     | g      | g   | g       | a    | g        | g       | g         | g       | g        | g         | g |
| t                         | 2264019                 | t                    | 2213524                   | c                | 2123442               | s                 | S88                         | rec14               | c                                    | 2                                     | -                          | c      | c    | c   | c        | c       | c    | c      | c    | c         | c  |          | c      | c     | c      | c   | c       | c    | c        | c       | c         | c       | c        | c         | c |
| c                         | 2264058                 | c                    | 2213563                   | g                | 2123481               | s                 | S88                         | rec14               | c                                    | S88                                   | ++                         | c      | g    | c   | c        | c       | c    | c      | c    | g         | g  |          | c      | g     | g      | c   | g       | g    | g        | g       | g         | g       | g        | g         | c |
| a                         | 2264097                 | a                    | 2213602                   | g                | 2123520               | s                 | S88                         | rec14               | a                                    | S88                                   | ++                         | a      | g    | a   | a        | a       | a    | a      | a    | a         | g  |          | a      | a     | a      | a   | a       | a    | a        | a       | a         | a       | a        | a         | a |
| g                         | 2264103                 | g                    | 2213608                   | a                | 2123526               | s                 | S88                         | rec14               | g                                    | S88                                   | ++                         | g      | a    | g   | g        | g       | g    | a      | g    | a         | a  |          | a      | t     | t      | a   | a       | g    | a        | a       | a         | a       | a        | a         | a |
| c                         | 2264127                 | c                    | 2213632                   | t                | 2123550               | s                 | S88                         | rec14               | c                                    | S88                                   | ++                         | c      | t    | c   | c        | c       | c    | c      | c    | t         | c  |          | c      | c     | c      | t   | c       | c    | t        | t       | t         | t       | t        | c         | c |
| a                         | 2264322                 | a                    | 2213827                   | g                | 2123745               | s                 | S88                         | rec14               | a                                    | S88                                   | ++                         | a      | g    | a   | a        | a       | a    | a      | a    | a         | a  |          | g      | g     | g      | a   | a       | a    | a        | a       | a         | a       | a        | a         | a |
| c                         | 2264361                 | c                    | 2213866                   | t                | 2123784               | s                 | S88                         | rec14               | c                                    | S88                                   | ++++                       | c      | c    | c   | c        | c       | c    | c      | c    | c         | c  |          | c      | c     | c      | c   | c       | c    | c        | c       | c         | c       | c        | c         | c |
| a                         | 2264487                 | a                    | 2213992                   | g                | 2123910               | s                 | S88                         | rec14               | g                                    | 2                                     | -                          | g      | a    | g   | a        | a       | a    | g      | g    | g         | g  |          | g      | a     | a      | g   | g       | g    | g        | g       | g         | g       | g        | g         | g |
| g                         | 2264679                 | g                    | 2214184                   | a                | 2124102               | s                 | S88                         | rec14               | g                                    | S88                                   | ++                         | g      | g    | g   | a        | g       | g    | g      | g    | g         | g  |          | g      | g     | g      | g   | g       | g    | g        | a       | a         | a       | a        | a         | a |
| a                         | 2264706                 | a                    | 2214211                   | g                | 2124129               | s                 | S88                         | rec14               | g                                    | 2                                     |                            |        |      |     |          |         |      |        |      |           |    |          |        |       |        |     |         |      |          |         |           |         |          |           |   |

| ExPEC genome site details |                         |                      |                           |                  |                       |                   |                             |                     |                                      | Outgroup Strains Details <sup>1</sup> |                            |        |      |     |          |         |      |        |      |           |    |          |        |       |        |     |         |      |          |         |           |         |          |           |
|---------------------------|-------------------------|----------------------|---------------------------|------------------|-----------------------|-------------------|-----------------------------|---------------------|--------------------------------------|---------------------------------------|----------------------------|--------|------|-----|----------|---------|------|--------|------|-----------|----|----------|--------|-------|--------|-----|---------|------|----------|---------|-----------|---------|----------|-----------|
| UT189 <sup>b</sup>        | UT189 site <sup>c</sup> | APEC 01 <sup>b</sup> | APEC 01 site <sup>c</sup> | S86 <sup>b</sup> | S86 site <sup>c</sup> | type <sup>d</sup> | Event Lineage <sup>ef</sup> | Recombinant segment | Inferred ancestral base <sup>g</sup> | Outgroup Analysis <sup>e</sup>        | Support level <sup>h</sup> | CFT073 | ED1a | 536 | E2348/69 | SMS 3-5 | IA39 | UMN026 | K-12 | ATCC 8739 | HS | D1 Sd197 | CB9615 | Sakai | EDL933 | IA1 | E24377A | SE11 | SS Sd046 | F2a 301 | F2a 2457T | F5 8401 | B4 Sd227 | B18 BS512 |
| a                         | 2113517                 | g                    | 2134277                   | g                | 2041947               | s                 | AS                          | rec15               | a                                    | AS                                    | ++                         | a      | g    | a   | g        | g       | g    | g      | g    | g         | g  | g        | g      | g     | g      | a   | g       | g    | g        | g       | g         | g       | g        | g         |
| a                         | 2113679                 | g                    | 2134439                   | g                | 2042109               | nc                | AS                          | rec15               | a                                    | AS                                    | ++                         | a      | g    | a   | g        | g       | g    | g      | g    | g         | g  | g        | g      | g     | g      | g   | g       | g    | g        | g       | g         | g       | g        | g         |
| g                         | 2113780                 | a                    | 2134540                   | a                | 2042210               | nc                | AS                          | rec15               | g                                    | AS                                    | ++                         | a      | g    | a   | g        | a       | a    | a      | a    | a         | a  | a        | a      | a     | a      | a   | a       | a    | a        | a       | a         | a       | a        | a         |
| t                         | 2113844                 | g                    | 2134604                   | a                | 2042273               | nc                | AS                          | rec15               | t                                    | AS                                    | ++                         | t      | a    | t   | g        | a       | r    | g      | a    | a         | a  | g        | g      | a     | a      | a   | a       | a    | a        | a       | a         | a       | a        | a         |
| g                         | 2195306                 | c                    | 2150697                   | c                | 2060909               | nc                | UT189/AS                    | rec16               | g                                    | AS                                    | ++                         | t      | t    | g   | c        | c       | c    | c      | c    | c         | c  | c        | c      | c     | c      | c   | c       | c    | c        | c       | c         | c       | c        | c         |
| t                         | 2195484                 | c                    | 2150875                   | c                | 2061087               | s                 | UT189/AS                    | rec16               | t                                    | AS                                    | ++                         | c      | t    | t   | c        | t       | t    | t      | t    | t         | t  | t        | t      | t     | t      | t   | t       | t    | t        | t       | t         | t       | t        | t         |
| t                         | 2195502                 | g                    | 2150893                   | g                | 2061105               | ns                | UT189/AS                    | rec16               | t                                    | AS                                    | ++++                       | t      | t    | t   | g        | c       | t    | t      | t    | t         | t  | t        | t      | t     | t      | t   | t       | t    | t        | t       | t         | t       | t        | t         |
| t                         | 2195518                 | a                    | 2150909                   | a                | 2061121               | ns                | UT189/AS                    | rec16               | a                                    | UT189                                 | ++++                       | a      | a    | t   | a        | a       | a    | a      | a    | a         | a  | a        | a      | a     | a      | a   | a       | a    | a        | a       | a         | a       | a        | a         |
| c                         | 2195534                 | g                    | 2150925                   | g                | 2061137               | s                 | UT189/AS                    | rec16               | c                                    | AS                                    | ++                         | a      | c    | c   | g        | c       | c    | c      | c    | c         | c  | c        | c      | c     | c      | c   | c       | c    | c        | c       | c         | c       | c        | c         |
| a                         | 2195647                 | c                    | 2151038                   | c                | 2061250               | nc                | UT189/AS                    | rec16               | c                                    | UT189                                 | ++++                       | c      | c    | a   | c        | c       | c    | c      | c    | c         | c  | c        | c      | c     | c      | c   | c       | c    | c        | c       | c         | c       | c        | c         |
| a                         | 2195997                 | g                    | 2151388                   | g                | 2061600               | ns                | UT189/AS                    | rec16               | a                                    | AS                                    | ++                         | a      | a    | a   | g        | g       | g    | g      | g    | g         | g  | g        | g      | g     | g      | g   | g       | g    | g        | g       | g         | g       | g        | g         |
| t                         | 2196325                 | g                    | 2151716                   | g                | 2061928               | nc                | UT189/AS                    | rec16               | t                                    | AS                                    | ++                         | t      | t    | g   | g        | g       | g    | g      | g    | g         | g  | g        | g      | g     | g      | g   | g       | g    | g        | g       | g         | g       | g        | g         |
| g                         | 2196556                 | t                    | 2151947                   | t                | 2062159               | nc                | UT189/AS                    | rec16               | g                                    | AS                                    | ++                         | g      | g    | g   | t        | t       | t    | t      | t    | t         | t  | t        | t      | t     | t      | t   | t       | t    | t        | t       | t         | t       | t        | t         |
| t                         | 2196747                 | -                    | 2152137                   | -                | 2062349               | del               | UT189/AS                    | rec16               | t                                    | AS                                    | ++                         | t      | t    | t   | -        | -       | -    | -      | -    | -         | -  | -        | -      | -     | -      | -   | -       | -    | -        | -       | -         | -       | -        | -         |
| a                         | 2256041                 | -                    | 2152225                   | c                | 2115463               | s                 | UT189                       | rec17               | c                                    | UT189                                 | ++++                       | c      | c    | c   | c        | c       | c    | c      | c    | c         | c  | c        | c      | c     | c      | c   | c       | c    | c        | c       | c         | c       | c        | c         |
| g                         | 2256495                 | -                    | 2152225                   | a                | 2115917               | ns                | UT189                       | rec17               | a                                    | UT189                                 | ++++                       | a      | a    | a   | a        | a       | a    | a      | a    | a         | a  | a        | a      | a     | a      | a   | a       | a    | a        | a       | a         | a       | a        | a         |
| t                         | 2256497                 | -                    | 2152225                   | c                | 2115919               | ns                | UT189                       | rec17               | c                                    | UT189                                 | ++++                       | c      | c    | c   | c        | c       | c    | c      | c    | c         | c  | c        | c      | c     | c      | c   | c       | c    | c        | c       | c         | c       | c        | c         |
| g                         | 2256498                 | -                    | 2152225                   | a                | 2115920               | s                 | UT189                       | rec17               | a                                    | UT189                                 | ++++                       | a      | a    | a   | a        | a       | a    | a      | a    | a         | a  | a        | a      | a     | a      | a   | a       | a    | a        | a       | a         | a       | a        | a         |
| t                         | 2256501                 | -                    | 2152225                   | c                | 2115923               | s                 | UT189                       | rec17               | c                                    | UT189                                 | ++++                       | c      | c    | c   | c        | c       | c    | c      | c    | c         | c  | c        | c      | c     | c      | c   | c       | c    | c        | c       | c         | c       | c        | c         |
| c                         | 2256649                 | -                    | 2152225                   | t                | 2116071               | ns                | UT189                       | rec17               | t                                    | UT189                                 | ++++                       | t      | t    | t   | t        | t       | t    | t      | t    | t         | t  | t        | t      | t     | t      | t   | t       | t    | t        | t       | t         | t       | t        | t         |
| t                         | 2256657                 | -                    | 2152225                   | c                | 2116079               | s                 | UT189                       | rec17               | c                                    | UT189                                 | ++                         | c      | c    | c   | t        | c       | c    | c      | c    | c         | c  | c        | c      | c     | c      | c   | c       | c    | c        | c       | c         | c       | c        | c         |
| g                         | 2256660                 | -                    | 2152225                   | a                | 2116082               | s                 | UT189                       | rec17               | a                                    | UT189                                 | ++                         | a      | a    | a   | g        | a       | a    | a      | a    | a         | a  | a        | a      | a     | a      | a   | a       | a    | a        | a       | a         | a       | a        | a         |
| t                         | 2256666                 | -                    | 2152225                   | g                | 2116088               | s                 | UT189                       | rec17               | g                                    | UT189                                 | ++                         | g      | g    | g   | t        | g       | g    | g      | g    | g         | g  | g        | g      | g     | g      | g   | g       | g    | g        | g       | g         | g       | g        | g         |
| g                         | 2256759                 | -                    | 2152225                   | a                | 2116181               | s                 | UT189                       | rec17               | a                                    | UT189                                 | ++                         | a      | c    | a   | g        | a       | a    | a      | a    | a         | a  | a        | a      | a     | a      | a   | a       | a    | a        | a       | a         | a       | a        | a         |
| t                         | 2256774                 | -                    | 2152225                   | g                | 2116196               | s                 | UT189                       | rec17               | g                                    | UT189                                 | ++++                       | g      | g    | g   | g        | g       | g    | g      | g    | g         | g  | g        | g      | g     | g      | g   | g       | g    | g        | g       | g         | g       | g        | g         |
| c                         | 2256798                 | -                    | 2152225                   | t                | 2116220               | s                 | UT189                       | rec17               | t                                    | UT189                                 | ++                         | t      | t    | t   | t        | t       | t    | t      | t    | t         | t  | t        | t      | t     | t      | t   | t       | t    | t        | t       | t         | t       | t        | t         |
| t                         | 2256843                 | -                    | 2152225                   | c                | 2116265               | s                 | UT189                       | rec17               | c                                    | UT189                                 | ++                         | c      | c    | c   | c        | c       | c    | c      | c    | c         | c  | c        | c      | c     | c      | c   | c       | c    | c        | c       | c         | c       | c        | c         |
| a                         | 2256882                 | -                    | 2152225                   | t                | 2116304               | s                 | UT189                       | rec17               | t                                    | UT189                                 | ++                         | t      | t    | t   | t        | t       | t    | t      | t    | t         | t  | t        | t      | t     | t      | t   | t       | t    | t        | t       | t         | t       | t        | t         |
| a                         | 2256891                 | -                    | 2152225                   | c                | 2116313               | s                 | UT189                       | rec17               | c                                    | UT189                                 | ++++                       | c      | c    | c   | c        | c       | c    | c      | c    | c         | c  | c        | c      | c     | c      | c   | c       | c    | c        | c       | c         | c       | c        | c         |
| a                         | 2257335                 | -                    | 2152225                   | g                | 2116757               | s                 | UT189                       | rec17               | g                                    | UT189                                 | ++                         | g      | g    | g   | g        | a       | a    | a      | a    | a         | a  | a        | a      | a     | a      | a   | a       | a    | a        | a       | a         | a       | a        | a         |
| g                         | 2257888                 | -                    | 2152225                   | c                | 2117310               | s                 | UT189                       | rec17               | c                                    | UT189                                 | ++                         | c      | c    | c   | g        | g       | g    | g      | c    | c         | c  | c        | c      | c     | c      | c   | c       | c    | c        | c       | c         | c       | c        | c         |
| a                         | 2257891                 | -                    | 2152225                   | g                | 2117313               | s                 | UT189                       | rec17               | g                                    | UT189                                 | ++                         | g      | g    | g   | a        | a       | a    | a      | a    | a         | a  | a        | a      | a     | a      | a   | a       | a    | a        | a       | a         | a       | a        | a         |
| g                         | 2257921                 | -                    | 2152225                   | a                | 2117343               | s                 | UT189                       | rec17               | a                                    | UT189                                 | ++                         | a      | g    | a   | g        | a       | a    | a      | a    | a         | a  | a        | a      | a     | a      | a   | a       | a    | a        | a       | a         | a       | a        | a         |
| t                         | 2257978                 | -                    | 2152225                   | c                | 2117400               | s                 | UT189                       | rec17               | c                                    | UT189                                 | ++++                       | c      | c    | c   | c        | c       | c    | c      | c    | c         | c  | c        | c      | c     | c      | c   | c       | c    | c        | c       | c         | c       | c        | c         |
| a                         | 2258245                 | -                    | 2152225                   | g                | 2117667               | s                 | UT189                       | rec17               | g                                    | UT189                                 | ++++                       | g      | g    | g   | a        | g       | g    | g      | g    | g         | g  | g        | g      | g     | g      | g   | g       | g    | g        | g       | g         | g       | g        | g         |
| g                         | 2258260                 | -                    | 2152225                   | a                | 2117682               | s                 | UT189                       | rec17               | a                                    | UT189                                 | ++                         | a      | a    | a   | a        | a       | a    | a      | a    | a         | a  | a        | a      | a     | a      | a   | a       | a    | a        | a       | a         | a       | a        | a         |
| t                         | 2258422                 | -                    | 2152225                   | c                | 2117844               | s                 | UT189                       | rec17               | c                                    | UT189                                 | ++                         | c      | c    | t   | c        | t       | c    | c      | c    | c         | c  | c        | c      | c     | c      | c   | c       | c    | c        | c       | c         | c       | c        | c         |
| c                         | 2258623                 | -                    | 2152225                   | t                | 2118045               | s                 | UT189                       | rec17               | t                                    | UT189                                 | ++                         | t      | t    | t   | t        | t       | c    | t      | c    | t         | c  | t        | t      | t     | t      | t   | t       | t    | t        | t       | t         | t       | t        | t         |
| a                         | 2258719                 | -                    | 2152225                   | g                | 2118141               | s                 | UT189                       | rec17               | g                                    | UT189                                 | ++++                       | g      | g    | g   | g        | a       | g    | g      | g    | g         | g  | g        | g      | g     | g      | g   | g       | g    | g        | g       | g         | g       | g        | g         |
| g                         | 2258806                 | -                    | 2152225                   | a                | 2118228               | s                 | UT189                       | rec17               | a                                    | UT189                                 | ++++                       | a      | a    | a   | a        | a       | a    | a      | a    | a         | a  | a        | a      | a     | a      | a   | a       | a    | a        | a       | a         | a       | a        | a         |
| t                         | 2259037                 | -                    | 2152225                   | a                | 2118459               | nc                | UT189                       | rec17               | a                                    | UT189                                 | ++++                       | a      | a    | a   | a        | a       | a    | a      | a    | a         | a  | a        | a      | a     | a      | a   | a       | a    | a        | a       | a         | a       | a        | a         |
| t                         | 2259164                 | -                    | 2152225                   | a                | 2118587               | ns                | UT189                       | rec17               | a                                    | UT189                                 | ++                         | a      | t    | a   | t        | a       | a    | a      | a    | a         | a  | a        | a      | a     | a      | a   | a       | a    | a        | a       | a         | a       | a        | a         |
| a                         | 2259198                 | -                    | 2152225                   | c                | 2118621               | s                 | UT189                       | rec17               | g                                    | UT189                                 | ++                         | g      | a    | g   | g        | g       | g    | g      | g    | g         | g  | g        | g      | g     | g      | g   | g       | g    | g        | g       | g         | g       | g        | g         |
| g                         | 2259234                 | -                    | 2152225                   | a                | 2118657               | s                 | UT189                       | rec17               | a                                    | UT189                                 | ++                         | a      | a    | a   | a        | a       | a    | a      | a    | a         | a  | a        | a      | a     | a      | a   | a       | a    | a        | a       | a         | a       | a        | a         |
| g                         | 2259243                 | -                    | 2152225                   | a                | 2118666               | s                 | UT189                       | rec17               | a                                    | UT189                                 | ++++                       | a      | a    | a   | a        | a       | a    | a      | a    | a         | a  | a        | a      | a     | a      | a   | a       | a    | a        | a       | a         | a       | a        | a         |
| a                         | 2259273                 | -                    | 2152225                   | g                | 2118696               | s                 | UT189                       | rec17               | g                                    | UT189                                 | ++++                       | g      | g    | g   | g        | g       | g    | g      | g    | g         | g  | g        | g      | g     | g      | g   | g       | g    | g        | g       | g         | g       | g        | g         |
| t                         | 2259279                 | -                    | 2152225                   | c                | 2118702               | s                 | UT189                       | rec17               | c                                    | UT189                                 | ++++                       | c      | c    | c   | c        | c       | c    | c      | c    | c         | c  | c        | c      | c     | c      | c   | c       | c    | c        | c       | c         | c       | c        | c         |
| a                         | 2259462                 | -                    | 2152225                   | g                | 2118885               | s                 | UT189                       | rec17               | g                                    | UT189                                 | ++++                       | g      | g    | g   | g        | g       | g    | g      | g    | g         | g  | g        | g      | g     | g      | g   | g       | g    | g        | g       | g         | g       | g        | g         |
| a                         | 2259626                 | -                    | 2152225                   | s                | 2119049               | s                 | UT189                       | rec17               | g                                    | UT189                                 | ++                         | a      | g    | g   | a        | g       | g    | g      | g    | g         | g  | g        | g      | g     | g      | g   | g       | g    | g        | g       | g         | g       | g        | g         |
| a                         | 2259627                 | -                    | 2152225                   | s                | 2119050               | s                 | UT189                       | rec17               | g                                    | UT189                                 | ++                         | a      | g    | g   | a        | g       | g    | g      | g    | g         | g  | g        | g      | g     | g      | g   | g       | g    | g        | g       | g         | g       | g        | g         |
| a                         | 2259642                 | -                    | 2152225                   | g                | 2119065               | s                 | UT189                       | rec17               | g                                    | UT189                                 | ++                         | a      | g    | g   | a        | g       | g    | g      | g    | g         | g  | g        | g      | g     | g      | g   | g       | g    | g        | g       | g         | g       | g        | g         |
| a                         | 2259770                 | -                    | 2152225                   | g                | 2119193               | s                 | UT189                       | rec17               | g                                    | UT189                                 | ++                         | g      | a    | g   | a        | a       | a    | a      | a    | a         | a  | a        | a      | a     | a      | a   | a       | a    | a        | a       | a         | a       | a        | a         |
| a                         | 2259873                 | -                    | 2152225                   | c                | 2119296               | s                 | UT189                       | rec17               | c                                    | UT189                                 | ++                         | c      | c    | c   | c        |         |      |        |      |           |    |          |        |       |        |     |         |      |          |         |           |         |          |           |

Page 12

Table S8. Allocation of recombinational SNPs to lineages by virtual outgroup analysis<sup>a</sup>

Table S8. Allocation of recombinational SNPs to lineages by virtual outgroup analysis<sup>a</sup>

| ExPEC genome site details |                         |                      |                           |                  |                       |                   |                             |                     |                                      | Outgroup Strains Details <sup>1</sup> |                            |        |      |     |          |         |      |        |      |           |    |          |        |       |        |     |         |      |          |         |           |         |          |           |   |   |
|---------------------------|-------------------------|----------------------|---------------------------|------------------|-----------------------|-------------------|-----------------------------|---------------------|--------------------------------------|---------------------------------------|----------------------------|--------|------|-----|----------|---------|------|--------|------|-----------|----|----------|--------|-------|--------|-----|---------|------|----------|---------|-----------|---------|----------|-----------|---|---|
| UT189 <sup>b</sup>        | UTI89 site <sup>c</sup> | APEC 01 <sup>b</sup> | APEC 01 site <sup>c</sup> | S88 <sup>b</sup> | S88 site <sup>c</sup> | type <sup>d</sup> | Event Lineage <sup>de</sup> | Recombinant segment | Inferred ancestral base <sup>f</sup> | Outgroup Analysis <sup>g</sup>        | Support level <sup>h</sup> | CFT073 | ED1a | 536 | E2348/69 | SMS 3-5 | IA39 | UMN026 | K-12 | ATCC 8739 | HS | D1 Sd197 | CB9615 | Sakai | EDL933 | IA1 | E24377A | SE11 | SS Sd046 | F2a 301 | F2a 2457T | F5 8401 | B4 Sd227 | B18 BS512 |   |   |
| g                         | 2272588                 | a                    | 2222093                   | a                | 2132011               | s                 | UTI89/AS                    | rec18               | a                                    | UTI89                                 | ++++                       | a      | a    | a   | a        | a       | a    | a      | a    | a         | a  |          | a      | a     | a      | a   | a       | a    | a        | a       | a         | a       | a        | a         |   |   |
| g                         | 2272666                 | a                    | 2222171                   | a                | 2132089               | s                 | UTI89/AS                    | rec18               | g                                    | AS                                    | ++                         | g      | g    | g   | g        | g       | g    | g      | g    | g         | g  |          | a      | a     | a      | a   | a       | a    | a        | a       | a         | a       | a        | a         |   |   |
| t                         | 2272719                 | g                    | 2222224                   | g                | 2132142               | ns                | UTI89/AS                    | rec18               | t                                    | AS                                    | ++                         | t      | g    | t   | g        | t       | t    | g      | t    | g         | t  | g        | g      | g     | g      | g   | g       | g    | g        | g       | g         | g       | g        | g         |   |   |
| t                         | 2272731                 | c                    | 2222236                   | c                | 2132154               | ns                | UTI89/AS                    | rec18               | c                                    | UTI89                                 | ++++                       | c      | c    | c   | c        | c       | c    | c      | c    | c         | c  | c        | c      | c     | c      | c   | c       | c    | c        | c       | c         | c       | c        | c         |   |   |
| g                         | 2272801                 | a                    | 2222306                   | a                | 2132224               | s                 | UTI89/AS                    | rec18               | a                                    | UTI89                                 | ++                         | a      | a    | a   | a        | a       | a    | a      | a    | a         | a  | a        | a      | a     | a      | a   | a       | a    | a        | a       | a         | a       | a        | a         |   |   |
| g                         | 2272813                 | a                    | 2222318                   | a                | 2132236               | s                 | UTI89/AS                    | rec18               | g                                    | AS                                    | ++                         | g      | g    | g   | g        | a       | a    | a      | a    | a         | a  | g        | g      | g     | g      | g   | g       | g    | g        | g       | g         | g       | g        | g         | g |   |
| g                         | 2272825                 | a                    | 2222330                   | a                | 2132248               | ns                | UTI89/AS                    | rec18               | g                                    | AS                                    | ++                         | g      | a    | g   | a        | a       | a    | a      | a    | a         | a  | g        | g      | g     | g      | g   | g       | g    | g        | g       | g         | g       | g        | g         | g |   |
| t                         | 2272827                 | c                    | 2222332                   | c                | 2132250               | ns                | UTI89/AS                    | rec18               | t                                    | AS                                    | ++                         | c      | t    | t   | c        | c       | c    | c      | c    | t         | t  |          | c      | t     | t      | c   | c       | t    | t        | c       | c         | c       | t        | t         |   |   |
| a                         | 2272873                 | g                    | 2222378                   | g                | 2132296               | s                 | UTI89/AS                    | rec18               | g                                    | UTI89                                 | ++                         | g      | g    | t   | g        | g       | g    | g      | g    | g         | g  |          | g      | a     | a      | g   | g       | g    | g        | g       | g         | g       | g        | g         | g |   |
| a                         | 2272909                 | g                    | 2222414                   | g                | 2132332               | s                 | UTI89/AS                    | rec18               | a                                    | AS                                    | ++                         | a      | a    | a   | a        | g       | g    | g      | a    | a         | a  |          | a      | g     | a      | a   | a       | a    | a        | a       | a         | a       | a        | a         | a |   |
| c                         | 2272966                 | t                    | 2222471                   | t                | 2132389               | s                 | UTI89/AS                    | rec18               | c                                    | AS                                    | +++                        | c      | c    | c   | c        | t       | t    | c      | t    | c         | c  |          | c      | c     | c      | c   | c       | c    | c        | c       | c         | c       | c        | c         | c |   |
| a                         | 2272978                 | g                    | 2222483                   | g                | 2132401               | s                 | UTI89/AS                    | rec18               | g                                    | UTI89                                 | ++++                       | g      | g    | g   | g        | g       | g    | g      | g    | g         | g  |          | g      | g     | g      | g   | g       | g    | g        | g       | g         | g       | g        | g         | g |   |
| g                         | 2273011                 | a                    | 2222516                   | a                | 2132434               | s                 | UTI89/AS                    | rec18               | a                                    | UTI89                                 | ++                         | a      | a    | g   | g        | a       | a    | a      | a    | a         | a  |          | g      | g     | g      | g   | a       | a    | a        | a       | a         | a       | a        | a         | a |   |
| a                         | 2273047                 | t                    | 2222552                   | t                | 2132470               | s                 | UTI89/AS                    | rec18               | a                                    | AS                                    | ++                         | t      | a    | a   | a        | t       | t    | t      | a    | a         | a  |          | a      | a     | a      | a   | a       | a    | a        | a       | a         | a       | a        | a         | a |   |
| t                         | 2273071                 | a                    | 2222576                   | a                | 2132494               | s                 | UTI89/AS                    | rec18               | a                                    | UTI89                                 | ++                         | a      | g    | a   | t        | a       | a    | a      | a    | a         | g  |          | t      | t     | a      | a   | g       | a    | g        | g       | g         | g       | g        | g         | g |   |
| g                         | 2273074                 | a                    | 2222579                   | a                | 2132497               | s                 | UTI89/AS                    | rec18               | a                                    | UTI89                                 | ++                         | a      | g    | a   | g        | a       | a    | a      | a    | a         | a  |          | g      | g     | g      | a   | a       | a    | g        | g       | g         | g       | g        | g         | g | g |
| a                         | 2273077                 | g                    | 2222582                   | g                | 2132500               | s                 | UTI89/AS                    | rec18               | g                                    | UTI89                                 | ++                         | g      | a    | g   | a        | g       | g    | g      | g    | g         | g  |          | a      | a     | a      | g   | g       | g    | a        | a       | a         | a       | a        | a         | a | a |
| c                         | 2273102                 | t                    | 2222607                   | t                | 2132525               | ns                | UTI89/AS                    | rec18               | c                                    | AS                                    | ++                         | t      | c    | c   | c        | t       | t    | t      | t    | t         | t  |          | c      | c     | c      | t   | t       | t    | t        | t       | t         | t       | t        | t         | t |   |
| g                         | 2273131                 | a                    | 2222636                   | a                | 2132554               | s                 | UTI89/AS                    | rec18               | a                                    | UTI89                                 | ++++                       | a      | a    | g   | a        | a       | a    | a      | a    | a         | a  |          | a      | a     | a      | a   | a       | a    | a        | a       | a         | a       | a        | a         | a |   |
| a                         | 2273149                 | g                    | 2222654                   | g                | 2132572               | s                 | UTI89/AS                    | rec18               | g                                    | UTI89                                 | +++                        | g      | g    | a   | g        | g       | g    | g      | g    | g         | g  |          | g      | g     | g      | g   | g       | g    | g        | g       | g         | g       | g        | g         | g |   |
| g                         | 2273179                 | a                    | 2222684                   | a                | 2132602               | s                 | UTI89/AS                    | rec18               | a                                    | UTI89                                 | +++                        | a      | a    | a   | g        | a       | g    | a      | a    | a         | g  |          | a      | g     | a      | a   | a       | a    | a        | a       | a         | a       | a        | a         | a |   |
| c                         | 2273200                 | t                    | 2222705                   | t                | 2132623               | s                 | UTI89/AS                    | rec18               | c                                    | AS                                    | ++                         | c      | c    | c   | c        | t       | t    | c      | c    | c         | c  |          | c      | c     | c      | c   | c       | c    | c        | c       | c         | c       | c        | c         | c |   |
| g                         | 2273373                 | t                    | 2222878                   | t                | 2132796               | s                 | UTI89/AS                    | rec18               | t                                    | UTI89                                 | ++++                       | t      | t    | t   | t        | t       | t    | t      | t    | t         | t  |          | t      | t     | t      | t   | t       | t    | t        | t       | t         | t       | t        | t         | t |   |
| a                         | 2273463                 | g                    | 2222968                   | g                | 2132886               | s                 | UTI89/AS                    | rec18               | a                                    | AS                                    | ++                         | a      | a    | g   | a        | a       | a    | a      | a    | c         | a  |          | c      | c     | c      | g   | a       | a    | a        | c       | c         | c       | a        | a         | a |   |
| c                         | 2273496                 | a                    | 2223001                   | a                | 2132919               | ns                | UTI89/AS                    | rec18               | c                                    | AS                                    | ++++                       | c      | c    | c   | c        | c       | c    | c      | c    | c         | c  |          | c      | c     | c      | c   | c       | c    | c        | c       | c         | c       | c        | c         | c |   |
| g                         | 2273535                 | a                    | 2223040                   | a                | 2132958               | ns                | UTI89/AS                    | rec18               | a                                    | UTI89                                 | +++                        | g      | a    | a   | g        | a       | g    | a      | g    | a         | g  |          | g      | g     | g      | g   | g       | g    | g        | g       | g         | g       | g        | g         | g |   |
| t                         | 2273537                 | g                    | 2223042                   | g                | 2132960               | ns                | UTI89/AS                    | rec18               | g                                    | UTI89                                 | ++++                       | g      | g    | g   | g        | g       | g    | t      | g    | g         |    | g        | g      | g     | g      | g   | g       | g    | g        | g       | g         | g       | g        | g         | g |   |
| a                         | 2273550                 | c                    | 2223055                   | c                | 2132973               | s                 | UTI89/AS                    | rec18               | c                                    | UTI89                                 | ++                         | c      | c    | c   | c        | c       | c    | a      | a    | t         |    | t        | t      | a     | c      | c   | t       | t    | t        | t       | t         | t       | t        | t         | t |   |
| g                         | 2273553                 | t                    | 2223058                   | t                | 2132976               | s                 | UTI89/AS                    | rec18               | t                                    | UTI89                                 | ++                         | t      | t    | t   | t        | t       | t    | g      | g    | t         |    | t        | t      | t     | g      | t   | t       | t    | t        | t       | t         | t       | t        | t         | t |   |
| g                         | 2273604                 | a                    | 2223109                   | a                | 2133027               | s                 | UTI89/AS                    | rec18               | g                                    | AS                                    | ++                         | a      | g    | g   | a        | a       | g    | g      | g    |           |    | g        | g      | g     | a      | g   | g       | g    | g        | g       | g         | g       | g        | g         | g | g |
| a                         | 2273610                 | g                    | 2223115                   | g                | 2133033               | s                 | UTI89/AS                    | rec18               | a                                    | AS                                    | ++                         | -      | a    | a   | a        | g       | g    | a      | a    |           |    | a        | a      | a     | a      | a   | a       | a    | a        | a       | a         | a       | a        | a         | a |   |
| c                         | 2273616                 | g                    | 2223121                   | g                | 2133039               | s                 | UTI89/AS                    | rec18               | g                                    | UTI89                                 | ++++                       | g      | g    | g   | g        | g       | g    | g      | g    | g         |    | g        | g      | g     | g      | g   | g       | g    | g        | g       | g         | g       | g        | g         | g |   |
| t                         | 2273619                 | c                    | 2223124                   | c                | 2133042               | s                 | UTI89/AS                    | rec18               | c                                    | UTI89                                 | ++++                       | c      | c    | c   | c        | c       | c    | c      | c    | c         |    | c        | c      | c     | c      | c   | c       | c    | c        | c       | c         | c       | c        | c         | c |   |
| a                         | 2273703                 | g                    | 2223208                   | g                | 2133126               | s                 | UTI89/AS                    | rec18               | a                                    | AS                                    | ++++                       | a      | a    | a   | a        | g       | a    | a      | a    | a         |    | a        | a      | a     | a      | a   | a       | a    | a        | a       | a         | a       | a        | a         | a |   |
| t                         | 2273852                 | g                    | 2223357                   | g                | 2133275               | s                 | UTI89/AS                    | rec18               | g                                    | UTI89                                 | ++++                       | g      | g    | g   | g        | g       | g    | g      | g    | g         |    | g        | g      | g     | g      | g   | g       | g    | g        | g       | g         | g       | g        | g         | g |   |
| g                         | 2273960                 | a                    | 2223465                   | a                | 2133383               | s                 | UTI89/AS                    | rec18               | g                                    | AS                                    | ++                         | g      | a    | g   | g        | g       | g    | g      | g    | a         |    | g        | g      | g     | a      | a   | a       | g    | g        | g       | g         | g       | g        | g         | g |   |
| t                         | 2274143                 | c                    | 2223648                   | c                | 2133566               | s                 | UTI89/AS                    | rec18               | t                                    | AS                                    | ++                         | t      | c    | t   | c        | c       | t    | c      | t    | g         |    | c        | c      | c     | c      | c   | c       | c    | c        | c       | c         | c       | c        | c         | c |   |
| t                         | 2274227                 | c                    | 2223732                   | c                | 2133650               | s                 | UTI89/AS                    | rec18               | c                                    | UTI89                                 | ++                         | c      | t    | c   | t        | c       | t    | c      | c    | t         |    | c        | c      | c     | t      | t   | t       | t    | t        | t       | t         | t       | t        | t         | t |   |
| t                         | 2274254                 | c                    | 2223759                   | c                | 2133677               | s                 | UTI89/AS                    | rec18               | c                                    | UTI89                                 | ++                         | c      | c    | c   | c        | c       | t    | c      | c    | t         |    | c        | c      | c     | c      | c   | c       | c    | c        | c       | c         | c       | c        | c         | c |   |
| g                         | 2274278                 | a                    | 2223783                   | a                | 2133701               | s                 | UTI89/AS                    | rec18               | g                                    | AS                                    | ++++                       | g      | g    | g   | g        | g       | g    | g      | g    | g         |    | g        | g      | g     | g      | g   | g       | g    | g        | g       | g         | g       | g        | g         | g |   |
| t                         | 2274290                 | c                    | 2223795                   | c                | 2133713               | s                 | UTI89/AS                    | rec18               | t                                    | AS                                    | ++++                       | t      | t    | t   | t        | t       | t    | t      | t    | t         |    | t        | t      | t     | t      | t   | t       | t    | t        | t       | t         | t       | t        | t         | t |   |
| a                         | 2274332                 | g                    | 2223837                   | g                | 2133755               | s                 | UTI89/AS                    | rec18               | a                                    | AS                                    | ++                         | a      | a    | a   | g        | g       | g    | g      | g    | t         |    | a        | g      | g     | g      | g   | g       | g    | g        | g       | g         | g       | g        | g         | g |   |
| a                         | 2274344                 | g                    | 2223849                   | g                | 2133767               | s                 | UTI89/AS                    | rec18               | a                                    | AS                                    | ++++                       | a      | a    | a   | a        | a       | a    | a      | a    | a         |    | a        | a      | a     | a      | a   | a       | a    | a        | a       | a         | a       | a        | a         | a |   |
| a                         | 2274362                 | t                    | 2223867                   | t                | 2133785               | s                 | UTI89/AS                    | rec18               | a                                    | AS                                    | ++                         | a      | a    | a   | a        | a       | a    | a      | a    | a         |    | g        | a      | t     | t      | t   | a       | a    | a        | a       | a         | a       | a        | a         | a | a |
| t                         | 2274377                 | c                    | 2223882                   | c                | 2133800               | s                 | UTI89/AS                    | rec18               | t                                    | AS                                    | ++                         | t      | c    | t   | t        | t       | t    | t      | c    | c         |    | t        | c      | c     | c      | c   | c       | c    | c        | c       | c         | c       | c        | c         | c |   |
| c                         | 2274383                 | t                    | 2223888                   | t                | 2133806               | s                 | UTI89/AS                    | rec18               | c                                    | AS                                    | ++                         | c      | c    | t   | c        | c       | c    | c      | t    | t         |    | c        | t      | t     | t      | t   | t       | t    | t        | t       | t         | t       | t        | t         | t |   |
| a                         | 2274509                 | g                    | 2224014                   | g                | 2133932               | s                 | UTI89/AS                    | rec18               | g                                    | UTI89                                 | ++++                       | g      | g    | g   | g        | g       | g    | g      | g    | g         |    | g        | g      | g     | g      | g   | g       | g    | g        | g       | g         | g       | g        | g         | g |   |
| g                         | 2274518                 | g                    | 2224023                   | g                | 2133941               | s                 | UTI89/AS                    | rec18               | g                                    | UTI89                                 | ++                         | g      | g    | a   | g        | a       | a    | a      | a    | a         |    | g        | a      | a     | a      | a   | a       | a    | a        | a       | a         | a       | a        | a         | a |   |
| a                         | 2274572                 | a                    | 2224077                   | a                | 2133995               | s                 | UTI89/AS                    | rec18               | g                                    | AS                                    | ++                         | g      | g    | g   | g        | g       | g    | g      | g    | g         |    | g        | g      | g     | a      | g   | a       | a    | a        | a       | a         | a       | a        | a         | a |   |
| a                         | 2274689                 | g                    | 2224194                   | g                | 2134112               | s                 | UTI89/AS                    | rec18               | g                                    | UTI89                                 | ++                         | g      | g    | g   | a        | a       | a    | a      | a    | a         |    | a        | a      | a     | a      | g   | a       | a    | a        | a       | a         | a       | a        | a         | a |   |
| c                         | 2274692                 | g                    | 2224197                   | g                | 2134115               | s                 | UTI89/AS                    | rec18               | g                                    | UTI89                                 | ++                         | g      | g    | g   | c        | c       | c    | c      | c    | c         |    | c        | c      | c     | t      | g   | t       | c    | c        | c       | c         | c       | c        | c         | c |   |
| a                         | 2274730                 | g                    | 2224235                   | g                | 2134153               | s                 | UTI89/AS                    | rec18               | a                                    | AS                                    | ++                         | a      | a    | a   | g        | a       | a    | a      |      |           |    |          |        |       |        |     |         |      |          |         |           |         |          |           |   |   |

| ExPEC genome site details |                         |                      |                           |                  |                       |                   |                             |                     |                                      | Outgroup Strains Details <sup>i</sup> |                            |        |      |     |          |         |      |        |      |           |    |          |        |       |        |     |         |      |          |         |           |         |          |           |
|---------------------------|-------------------------|----------------------|---------------------------|------------------|-----------------------|-------------------|-----------------------------|---------------------|--------------------------------------|---------------------------------------|----------------------------|--------|------|-----|----------|---------|------|--------|------|-----------|----|----------|--------|-------|--------|-----|---------|------|----------|---------|-----------|---------|----------|-----------|
| UT189 <sup>b</sup>        | UT189 site <sup>c</sup> | APEC 01 <sup>b</sup> | APEC 01 site <sup>c</sup> | S88 <sup>b</sup> | S88 site <sup>c</sup> | type <sup>d</sup> | Event Lineage <sup>ef</sup> | Recombinant segment | Inferred ancestral base <sup>g</sup> | Outgroup Analysis <sup>e</sup>        | Support level <sup>h</sup> | CFT073 | ED1a | 536 | E2348/69 | SMS 3-5 | IA39 | UMN026 | K-12 | ATCC 8739 | HS | D1 Sd197 | CB9615 | Sakai | EDL933 | IA1 | E24377A | SE11 | SS Ss046 | F2a 301 | F2a 2457T | F5 8401 | B4 Sb227 | B18 BS512 |
| -                         | 2309751                 | a                    | 2259648                   | t                | 2169567               | nc                | APEC/S88                    | rec19               | -                                    | A/S                                   | +/-                        | -      | -    | -   | c        | -       | -    | -      | -    | a         | -  | -        | -      | -     | -      | -   | a       | -    | -        | -       | -         | -       | -        |           |
| -                         | 2309751                 | t                    | 2259649                   | a                | 2169568               | nc                | APEC/S88                    | rec19               | a                                    | APEC                                  | ++                         | a      | a    | a   | a        | -       | -    | -      | -    | t         | -  | -        | -      | -     | -      | -   | t       | -    | -        | -       | -         | -       | -        |           |
| -                         | 2309751                 | a                    | 2259652                   | t                | 2169571               | nc                | APEC/S88                    | rec19               | a                                    | S88                                   | +++                        | a      | a    | a   | a        | -       | -    | -      | -    | a         | -  | -        | -      | -     | -      | -   | a       | -    | -        | -       | -         | -       | -        |           |
| -                         | 2309751                 | a                    | 2259653                   | t                | 2169572               | nc                | APEC/S88                    | rec19               | a                                    | S88                                   | +++                        | a      | a    | a   | g        | -       | -    | -      | -    | a         | -  | -        | -      | -     | -      | -   | a       | -    | -        | -       | -         | -       | -        |           |
| -                         | 2309751                 | c                    | 2259711                   | t                | 2169630               | nc                | APEC/S88                    | rec19               | t                                    | APEC                                  | +++                        | t      | t    | t   | t        | -       | -    | -      | -    | t         | -  | -        | -      | -     | -      | -   | t       | -    | -        | -       | -         | -       | -        |           |
| -                         | 2309751                 | c                    | 2259801                   | t                | 2169720               | nc                | APEC/S88                    | rec19               | c                                    | S88                                   | +++                        | c      | g    | c   | -        | -       | -    | -      | -    | c         | -  | -        | -      | -     | -      | -   | c       | -    | -        | -       | -         | -       | -        |           |
| -                         | 2309751                 | t                    | 2259831                   | a                | 2169750               | nc                | APEC/S88                    | rec19               | a                                    | APEC                                  | ++                         | a      | c    | t   | -        | -       | -    | -      | -    | t         | -  | -        | -      | -     | -      | -   | t       | -    | -        | -       | -         | -       | -        |           |
| -                         | 2309751                 | c                    | 2259834                   | a                | 2169753               | nc                | APEC/S88                    | rec19               | a                                    | APEC                                  | ++                         | a      | g    | a   | -        | -       | -    | -      | -    | c         | -  | -        | -      | -     | -      | -   | c       | -    | -        | -       | -         | -       | -        |           |
| -                         | 2309751                 | c                    | 2259882                   | t                | 2169801               | nc                | APEC/S88                    | rec19               | t                                    | APEC                                  | +++                        | t      | t    | t   | -        | -       | -    | -      | -    | -         | -  | -        | -      | -     | -      | -   | c       | -    | -        | -       | -         | -       | -        |           |
| -                         | 2309751                 | g                    | 2259906                   | a                | 2169825               | nc                | APEC/S88                    | rec19               | g                                    | S88                                   | ++                         | g      | a    | a   | -        | -       | -    | -      | -    | -         | -  | -        | -      | -     | -      | -   | g       | -    | -        | -       | -         | -       | -        |           |
| -                         | 2309751                 | c                    | 2259918                   | t                | 2169837               | nc                | APEC/S88                    | rec19               | c                                    | S88                                   | +++                        | c      | c    | t   | -        | -       | -    | -      | -    | -         | -  | -        | -      | -     | -      | -   | c       | -    | -        | -       | -         | -       | -        |           |
| -                         | 2309751                 | c                    | 2259938                   | t                | 2169857               | nc                | APEC/S88                    | rec19               | t                                    | APEC                                  | +++                        | t      | t    | t   | -        | -       | -    | -      | -    | -         | -  | -        | -      | -     | -      | -   | t       | -    | -        | -       | -         | -       | -        |           |
| -                         | 2309751                 | a                    | 2259954                   | g                | 2169873               | nc                | APEC/S88                    | rec19               | g                                    | APEC                                  | +++                        | g      | g    | g   | -        | -       | -    | -      | -    | -         | -  | -        | -      | -     | -      | -   | g       | -    | -        | -       | -         | -       | -        |           |
| -                         | 2309751                 | t                    | 2259969                   | g                | 2169888               | nc                | APEC/S88                    | rec19               | g                                    | APEC                                  | +++                        | g      | g    | g   | -        | -       | -    | -      | -    | -         | -  | -        | -      | -     | -      | -   | g       | -    | -        | -       | -         | -       | -        |           |
| -                         | 2309751                 | t                    | 2260003                   | c                | 2169922               | nc                | APEC/S88                    | rec19               | t                                    | S88                                   | +++                        | t      | t    | t   | -        | -       | -    | -      | -    | -         | -  | -        | -      | -     | -      | -   | t       | -    | -        | -       | -         | -       | -        |           |
| -                         | 2309751                 | g                    | 2260021                   | c                | 2169940               | nc                | APEC/S88                    | rec19               | g                                    | S88                                   | ++                         | g      | -    | g   | -        | -       | -    | -      | -    | -         | -  | -        | -      | -     | -      | -   | g       | -    | -        | -       | -         | -       | -        |           |
| -                         | 2309751                 | t                    | 2260026                   | c                | 2169945               | nc                | APEC/S88                    | rec19               | t                                    | S88                                   | +++                        | t      | t    | t   | -        | -       | -    | -      | -    | -         | -  | -        | -      | -     | -      | -   | t       | -    | -        | -       | -         | -       | -        |           |
| -                         | 2309751                 | c                    | 2260032                   | t                | 2169951               | nc                | APEC/S88                    | rec19               | c                                    | S88                                   | +++                        | c      | t    | c   | -        | -       | -    | -      | -    | -         | -  | -        | -      | -     | -      | -   | c       | -    | -        | -       | -         | -       | -        |           |
| -                         | 2309751                 | c                    | 2260065                   | t                | 2169984               | nc                | APEC/S88                    | rec19               | c                                    | S88                                   | +++                        | c      | c    | t   | -        | -       | -    | -      | -    | -         | -  | -        | -      | -     | -      | -   | c       | -    | -        | -       | -         | -       | -        |           |
| -                         | 2309751                 | t                    | 2260104                   | c                | 2170023               | nc                | APEC/S88                    | rec19               | c                                    | APEC                                  | +++                        | c      | c    | c   | -        | -       | -    | -      | -    | -         | -  | -        | -      | -     | -      | -   | c       | -    | -        | -       | -         | -       | -        |           |
| -                         | 2309751                 | a                    | 2260209                   | g                | 2170128               | nc                | APEC/S88                    | rec19               | g                                    | APEC                                  | ++                         | g      | a    | a   | -        | -       | -    | -      | -    | -         | -  | -        | -      | -     | -      | -   | g       | -    | -        | -       | -         | -       | -        |           |
| -                         | 2309751                 | t                    | 2260211                   | c                | 2170130               | nc                | APEC/S88                    | rec19               | c                                    | APEC                                  | ++                         | c      | t    | t   | -        | -       | -    | -      | -    | -         | -  | -        | -      | -     | -      | -   | t       | -    | -        | -       | -         | -       | -        |           |
| -                         | 2309751                 | c                    | 2260254                   | t                | 2170173               | nc                | APEC/S88                    | rec19               | t                                    | APEC                                  | +++                        | t      | t    | t   | -        | -       | -    | -      | -    | -         | -  | -        | -      | -     | -      | -   | t       | -    | -        | -       | -         | -       | -        |           |
| -                         | 2309751                 | a                    | 2260265                   | g                | 2170184               | nc                | APEC/S88                    | rec19               | a                                    | S88                                   | ++                         | a      | g    | a   | -        | -       | -    | -      | -    | -         | -  | -        | -      | -     | -      | -   | g       | -    | -        | -       | -         | -       | -        |           |
| -                         | 2309751                 | a                    | 2260308                   | t                | 2170227               | nc                | APEC/S88                    | rec19               | t                                    | APEC                                  | ++                         | t      | t    | a   | -        | -       | -    | -      | -    | -         | -  | -        | -      | -     | -      | -   | a       | -    | -        | -       | -         | -       | -        |           |
| -                         | 2309751                 | g                    | 2260314                   | a                | 2170233               | nc                | APEC/S88                    | rec19               | a                                    | APEC                                  | ++                         | a      | g    | g   | -        | -       | -    | -      | -    | -         | -  | -        | -      | -     | -      | -   | a       | -    | -        | -       | -         | -       | -        |           |
| -                         | 2309751                 | t                    | 2260329                   | c                | 2170248               | nc                | APEC/S88                    | rec19               | c                                    | APEC                                  | ++                         | c      | g    | t   | -        | -       | -    | -      | -    | -         | -  | -        | -      | -     | -      | -   | c       | -    | -        | -       | -         | -       | -        |           |
| -                         | 2309751                 | g                    | 2260362                   | a                | 2170281               | nc                | APEC/S88                    | rec19               | g                                    | S88                                   | +++                        | g      | a    | g   | -        | -       | -    | -      | -    | -         | -  | -        | -      | -     | -      | -   | g       | -    | -        | -       | -         | -       | -        |           |
| -                         | 2309751                 | c                    | 2260391                   | t                | 2170310               | nc                | APEC/S88                    | rec19               | c                                    | S88                                   | +++                        | c      | c    | c   | -        | -       | -    | -      | -    | -         | -  | -        | -      | -     | -      | -   | c       | -    | -        | -       | -         | -       | -        |           |
| -                         | 2309751                 | t                    | 2260419                   | a                | 2170338               | nc                | APEC/S88                    | rec19               | t                                    | S88                                   | +++                        | t      | t    | t   | -        | -       | -    | -      | -    | -         | -  | -        | -      | -     | -      | -   | t       | -    | -        | -       | -         | -       | -        |           |
| -                         | 2309751                 | t                    | 2260425                   | c                | 2170344               | nc                | APEC/S88                    | rec19               | c                                    | APEC                                  | +++                        | c      | g    | c   | -        | -       | -    | -      | -    | -         | -  | -        | -      | -     | -      | -   | c       | -    | -        | -       | -         | -       | -        |           |
| -                         | 2309751                 | a                    | 2260467                   | c                | 2170386               | nc                | APEC/S88                    | rec19               | a                                    | S88                                   | +++                        | a      | a    | a   | -        | -       | -    | -      | -    | -         | -  | -        | -      | -     | -      | -   | c       | -    | -        | -       | -         | -       | -        |           |
| -                         | 2309751                 | t                    | 2260530                   | c                | 2170449               | nc                | APEC/S88                    | rec19               | t                                    | S88                                   | ++                         | t      | c    | c   | -        | -       | -    | -      | -    | -         | -  | -        | -      | -     | -      | -   | t       | -    | -        | -       | -         | -       | -        |           |
| -                         | 2309751                 | t                    | 2260753                   | c                | 2170672               | nc                | APEC/S88                    | rec19               | c                                    | APEC                                  | +++                        | c      | c    | c   | -        | -       | -    | -      | -    | -         | -  | -        | -      | -     | -      | -   | c       | -    | -        | -       | -         | -       | -        |           |
| -                         | 2309751                 | t                    | 2260809                   | c                | 2170728               | nc                | APEC/S88                    | rec19               | c                                    | APEC                                  | ++                         | c      | a    | c   | -        | -       | -    | -      | -    | -         | -  | -        | -      | -     | -      | -   | t       | -    | -        | -       | -         | -       | -        |           |
| -                         | 2309751                 | t                    | 2260839                   | c                | 2170758               | nc                | APEC/S88                    | rec19               | c                                    | APEC                                  | ++                         | c      | g    | c   | -        | -       | -    | -      | -    | -         | -  | -        | -      | -     | -      | -   | t       | -    | -        | -       | -         | -       | -        |           |
| -                         | 2309751                 | t                    | 2260886                   | c                | 2170805               | nc                | APEC/S88                    | rec19               | c                                    | APEC                                  | +++                        | c      | g    | c   | -        | -       | -    | -      | -    | -         | -  | -        | -      | -     | -      | -   | c       | -    | -        | -       | -         | -       | -        |           |
| -                         | 2309751                 | c                    | 2260964                   | t                | 2170883               | nc                | APEC/S88                    | rec19               | c                                    | S88                                   | ++                         | c      | t    | t   | -        | -       | -    | -      | -    | -         | -  | -        | -      | -     | -      | -   | c       | -    | -        | -       | -         | -       | -        |           |
| -                         | 2309751                 | a                    | 2261078                   | t                | 2170997               | nc                | APEC/S88                    | rec19               | t                                    | APEC                                  | +++                        | t      | a    | t   | -        | -       | -    | -      | -    | -         | -  | -        | -      | -     | -      | -   | t       | -    | -        | -       | -         | -       | -        |           |
| -                         | 2309751                 | c                    | 2261087                   | t                | 2171006               | nc                | APEC/S88                    | rec19               | c                                    | S88                                   | ++                         | c      | a    | c   | -        | -       | -    | -      | -    | -         | -  | -        | -      | -     | -      | -   | t       | -    | -        | -       | -         | -       | -        |           |
| -                         | 2309751                 | g                    | 2261111                   | t                | 2171030               | nc                | APEC/S88                    | rec19               | a                                    | A/S                                   | +/-                        | c      | a    | g   | -        | -       | -    | -      | -    | -         | -  | -        | -      | -     | -      | -   | t       | -    | -        | -       | -         | -       | -        |           |
| -                         | 2309751                 | g                    | 2261126                   | t                | 2171045               | nc                | APEC/S88                    | rec19               | g                                    | S88                                   | ++                         | g      | a    | g   | -        | -       | -    | -      | -    | -         | -  | -        | -      | -     | -      | -   | a       | -    | -        | -       | -         | -       | -        |           |
| -                         | 2309751                 | g                    | 2261150                   | a                | 2171069               | nc                | APEC/S88                    | rec19               | g                                    | S88                                   | ++                         | c      | g    | a   | -        | -       | -    | -      | -    | -         | -  | -        | -      | -     | -      | -   | g       | -    | -        | -       | -         | -       | -        |           |
| -                         | 2309751                 | a                    | 2261153                   | g                | 2171072               | nc                | APEC/S88                    | rec19               | g                                    | APEC                                  | +++                        | g      | t    | g   | -        | -       | -    | -      | -    | -         | -  | -        | -      | -     | -      | -   | g       | -    | -        | -       | -         | -       | -        |           |
| -                         | 2309751                 | g                    | 2261162                   | a                | 2171081               | nc                | APEC/S88                    | rec19               | a                                    | APEC                                  | +++                        | a      | c    | a   | -        | -       | -    | -      | -    | -         | -  | -        | -      | -     | -      | -   | a       | -    | -        | -       | -         | -       | -        |           |
| -                         | 2309751                 | a                    | 2261165                   | c                | 2171084               | nc                | APEC/S88                    | rec19               | c                                    | APEC                                  | +++                        | c      | c    | c   | -        | -       | -    | -      | -    | -         | -  | -        | -      | -     | -      | -   | c       | -    | -        | -       | -         | -       | -        |           |
| -                         | 2309751                 | a                    | 2261180                   | g                | 2171099               | nc                | APEC/S88                    | rec19               | a                                    | S88                                   | +++                        | a      | a    | a   | -        | -       | -    | -      | -    | -         | -  | -        | -      | -     | -      | -   | a       | -    | -        | -       | -         | -       | -        |           |
| -                         | 2309751                 | a                    | 2261181                   | t                | 2171100               | nc                | APEC/S88                    | rec19               | a                                    | S88                                   | +++                        | a      | a    | a   | -        | -       | -    | -      | -    | -         | -  | -        | -      | -     | -      | -   | a       | -    | -        | -       | -         | -       | -        |           |
| -                         | 2309751                 | c                    | 2261215                   | g                | 2171134               | nc                | APEC/S88                    | rec19               | g                                    | APEC                                  | +++                        | g      | c    | g   | -        | -       | -    | -      | -    | -         | -  | -        | -      | -     | -      | -   | g       | -    | -        | -       | -         | -       | -        |           |
| -                         | 2309751                 | c                    | 2261503                   | t                | 2171422               | nc                | APEC/S88                    | rec19               | c                                    | S88                                   | +++                        | c      | t    | c   | -        | -       | -    | -      | -    | -         | -  | -        | -      | -     | -      | -   | c       | -    | -        | -       | -         | -       | -        |           |
| -                         | 2309751                 | a                    | 2261611                   | g                | 2171530               | nc                | APEC/S88                    | rec19               | g                                    | APEC                                  | ++                         | g      | a    | a   | -        | -       | -    | -      | -    | -         | -  | -        | -      | -     | -      | -   | a       | -    | -        | -       | -         | -       | -        |           |
| -                         | 2309751                 | a                    | 2261614                   | c                | 2171533               | nc                | APEC/S88                    | rec19               | c                                    | APEC                                  | ++                         | c      | g    | a   | -        | -       | -    | -      | -    | -         | -  | -        | -      | -     | -      | -   | g       | -    | -        | -       | -         | -       | -        |           |
| -                         | 2309751                 | t                    | 2261620                   | c                | 2171539               | nc                | APEC/S88                    | rec19               | c                                    | APEC                                  | ++                         | c      | t    | t   | -        | -       | -    | -      | -    | -         | -  | -        | -      | -     | -      | -   | t       | -    | -        | -       | -         | -       | -        |           |
| -                         | 2309751                 | a                    | 2261641                   | g                | 2171560               | nc                | APEC/S88                    | rec19               | a                                    | S88                                   | +++                        | a      | c    | a   | -        | -       | -    | -      | -    | -         | -  | -        | -      | -     | -      | -   | a       | -    | -        | -       | -         | -       | -        |           |
| -                         | 2309751                 | c                    | 2261744                   | t                | 2171663               | nc                | APEC/S88                    | rec19               | t                                    | APEC                                  | +++                        | t      | t    | t   | -        | -       | -    | -      | -    | -         | -  | -        | -      | -     | -      | -   | t       | -    | -        | -       | -         | -       | -        |           |
| -                         | 2309751                 | g                    | 2261746                   | t                | 2171665               | nc                | APEC/S88                    | rec19               | g                                    | S88                                   | ++                         | g      | a    | a   | -        | -       | -    | -      | -    | -         | -  | -        | -      | -     | -      | -   | g       | -    | -        | -       | -         | -       | -        |           |
|                           |                         |                      |                           |                  |                       |                   |                             |                     |                                      |                                       |                            |        |      |     |          |         |      |        |      |           |    |          |        |       |        |     |         |      |          |         |           |         |          |           |

| ExPEC genome site details |                         |                      |                           |                  |                       |                   |                             |                     |                                      | Outgroup Strains Details <sup>1</sup> |                            |        |      |     |          |         |       |        |      |           |    |          |        |       |        |      |         |      |          |         |           |         |          |           |
|---------------------------|-------------------------|----------------------|---------------------------|------------------|-----------------------|-------------------|-----------------------------|---------------------|--------------------------------------|---------------------------------------|----------------------------|--------|------|-----|----------|---------|-------|--------|------|-----------|----|----------|--------|-------|--------|------|---------|------|----------|---------|-----------|---------|----------|-----------|
| UT189 <sup>b</sup>        | UT189 site <sup>c</sup> | APEC 01 <sup>b</sup> | APEC 01 site <sup>c</sup> | S88 <sup>b</sup> | S88 site <sup>c</sup> | type <sup>d</sup> | Event Lineage <sup>ef</sup> | Recombinant segment | Inferred ancestral base <sup>g</sup> | Outgroup Analysis <sup>e</sup>        | Support level <sup>h</sup> | CFT073 | ED1a | 536 | E2348/69 | SMS 3-5 | IAI39 | UMN026 | K-12 | ATCC 8739 | HS | D1 Sd197 | CB9615 | Sakai | EDL933 | IAI1 | E24377A | SE11 | SS Ss046 | F2a 301 | F2a 2457T | F5 8401 | B4 Sb227 | B18 BS512 |
| -                         | 2309751                 | a                    | 2262571                   | g                | 2172490               | nc                | APEC/S88                    | rec19               | a                                    | S88                                   | ++                         | a      | g    | t   |          |         |       |        |      |           |    |          |        |       |        |      | g       |      |          |         |           |         |          |           |
| -                         | 2309751                 | g                    | 2262583                   | c                | 2172502               | nc                | APEC/S88                    | rec19               | c                                    | APEC                                  | ++                         | c      | a    | g   |          |         |       |        |      |           |    |          |        |       |        |      | g       |      |          |         |           |         |          |           |
| -                         | 2309751                 | t                    | 2262646                   | c                | 2172565               | nc                | APEC/S88                    | rec19               | c                                    | APEC                                  | ++                         | c      | a    | c   |          |         |       |        |      |           |    |          |        |       |        |      | a       |      |          |         |           |         |          |           |
| -                         | 2309751                 | t                    | 2262700                   | g                | 2172619               | nc                | APEC/S88                    | rec19               | g                                    | APEC                                  | ++                         | g      | t    | g   |          |         |       |        |      |           |    |          |        |       |        |      |         |      |          |         |           |         |          |           |
| -                         | 2309751                 | g                    | 2262721                   | a                | 2172640               | nc                | APEC/S88                    | rec19               | g                                    | S88                                   | ++                         | g      | g    | g   |          |         |       |        |      |           |    |          |        |       |        |      |         |      |          |         |           |         |          |           |
| -                         | 2309751                 | a                    | 2262766                   | g                | 2172685               | nc                | APEC/S88                    | rec19               | g                                    | APEC                                  | +++                        | g      | g    | g   |          |         |       |        |      |           |    |          |        |       |        |      | c       |      |          |         |           |         |          |           |
| -                         | 2309751                 | g                    | 2262769                   | a                | 2172688               | nc                | APEC/S88                    | rec19               | g                                    | S88                                   | +++                        | g      | g    | g   |          |         |       |        |      |           |    |          |        |       |        |      | c       |      |          |         |           |         |          |           |
| -                         | 2309751                 | g                    | 2262898                   | a                | 2172817               | nc                | APEC/S88                    | rec19               | a                                    | APEC                                  | ++                         | a      | a    | g   |          |         |       |        |      |           |    |          |        |       |        |      | c       |      |          |         |           |         |          |           |
| -                         | 2309751                 | g                    | 2262976                   | a                | 2172895               | nc                | APEC/S88                    | rec19               | g                                    | S88                                   | +++                        | g      | a    | g   |          |         |       |        |      |           |    |          |        |       |        |      | g       |      |          |         |           |         |          |           |
| -                         | 2309751                 | a                    | 2262994                   | t                | 2172913               | nc                | APEC/S88                    | rec19               | t                                    | APEC                                  | ++                         | t      | a    | c   |          |         |       |        |      |           |    |          |        |       |        |      | c       |      |          |         |           |         |          |           |
| -                         | 2309751                 | c                    | 2263003                   | t                | 2172922               | nc                | APEC/S88                    | rec19               | c                                    | S88                                   | +++                        | c      | a    | c   |          |         |       |        |      |           |    |          |        |       |        |      | c       |      |          |         |           |         |          |           |
| -                         | 2309751                 | g                    | 2263012                   | t                | 2172931               | nc                | APEC/S88                    | rec19               | g                                    | S88                                   | +++                        | g      | g    | g   |          |         |       |        |      |           |    |          |        |       |        |      | g       |      |          |         |           |         |          |           |
| -                         | 2309751                 | t                    | 2263015                   | g                | 2172934               | nc                | APEC/S88                    | rec19               | g                                    | APEC                                  | +++                        | g      | g    | g   |          |         |       |        |      |           |    |          |        |       |        |      | g       |      |          |         |           |         |          |           |
| -                         | 2309751                 | g                    | 2263018                   | a                | 2172937               | nc                | APEC/S88                    | rec19               | g                                    | S88                                   | ++                         | g      | g    | a   |          |         |       |        |      |           |    |          |        |       |        |      | a       |      |          |         |           |         |          |           |
| -                         | 2309751                 | t                    | 2263042                   | c                | 2172961               | nc                | APEC/S88                    | rec19               | t                                    | S88                                   | +++                        | t      | t    | t   |          |         |       |        |      |           |    |          |        |       |        |      | t       |      |          |         |           |         |          |           |
| -                         | 2309751                 | c                    | 2263051                   | t                | 2172970               | nc                | APEC/S88                    | rec19               | c                                    | S88                                   | ++                         | c      | c    | t   |          |         |       |        |      |           |    |          |        |       |        |      | t       |      |          |         |           |         |          |           |
| -                         | 2309751                 | g                    | 2263054                   | a                | 2172973               | nc                | APEC/S88                    | rec19               | g                                    | S88                                   | +++                        | g      | c    | g   |          |         |       |        |      |           |    |          |        |       |        |      | g       |      |          |         |           |         |          |           |
| -                         | 2309751                 | a                    | 2263066                   | g                | 2172985               | nc                | APEC/S88                    | rec19               | g                                    | APEC                                  | +++                        | g      | t    | g   |          |         |       |        |      |           |    |          |        |       |        |      | g       |      |          |         |           |         |          |           |
| -                         | 2309751                 | a                    | 2263069                   | g                | 2172988               | nc                | APEC/S88                    | rec19               | g                                    | APEC                                  | +++                        | g      | g    | g   |          |         |       |        |      |           |    |          |        |       |        |      | g       |      |          |         |           |         |          |           |
| -                         | 2309751                 | g                    | 2263090                   | a                | 2173009               | nc                | APEC/S88                    | rec19               | a                                    | APEC                                  | ++                         | a      | g    | g   |          |         |       |        |      |           |    |          |        |       |        |      | g       |      |          |         |           |         |          |           |
| -                         | 2309751                 | t                    | 2263096                   | c                | 2173015               | nc                | APEC/S88                    | rec19               | t                                    | S88                                   | ++                         | t      | t    | c   |          |         |       |        |      |           |    |          |        |       |        |      | c       |      |          |         |           |         |          |           |
| -                         | 2309751                 | t                    | 2263120                   | c                | 2173039               | nc                | APEC/S88                    | rec19               | c                                    | APEC                                  | +++                        | c      | a    | c   |          |         |       |        |      |           |    |          |        |       |        |      | c       |      |          |         |           |         |          |           |
| -                         | 2309751                 | g                    | 2263140                   | a                | 2173059               | nc                | APEC/S88                    | rec19               | g                                    | S88                                   | ++                         | g      | g    | a   |          |         |       |        |      |           |    |          |        |       |        |      | a       |      |          |         |           |         |          |           |
| -                         | 2309751                 | a                    | 2263147                   | t                | 2173066               | nc                | APEC/S88                    | rec19               | t                                    | APEC                                  | +++                        | t      | a    | t   |          |         |       |        |      |           |    |          |        |       |        |      | t       |      |          |         |           |         |          |           |
| -                         | 2309751                 | c                    | 2263165                   | a                | 2173084               | nc                | APEC/S88                    | rec19               | c                                    | S88                                   | +++                        | c      | c    | c   |          |         |       |        |      |           |    |          |        |       |        |      | c       |      |          |         |           |         |          |           |
| -                         | 2309751                 | c                    | 2263168                   | a                | 2173087               | nc                | APEC/S88                    | rec19               | c                                    | S88                                   | +++                        | c      | t    | c   |          |         |       |        |      |           |    |          |        |       |        |      | c       |      |          |         |           |         |          |           |
| -                         | 2309751                 | c                    | 2263216                   | t                | 2173135               | nc                | APEC/S88                    | rec19               | t                                    | APEC                                  | +++                        | t      | t    | t   |          |         |       |        |      |           |    |          |        |       |        |      | t       |      |          |         |           |         |          |           |
| -                         | 2309751                 | t                    | 2263225                   | g                | 2173144               | nc                | APEC/S88                    | rec19               | g                                    | APEC                                  | ++                         | g      | t    | t   |          |         |       |        |      |           |    |          |        |       |        |      | g       |      |          |         |           |         |          |           |
| -                         | 2309751                 | g                    | 2263234                   | a                | 2173153               | nc                | APEC/S88                    | rec19               | a                                    | APEC                                  | +++                        | a      | g    | a   |          |         |       |        |      |           |    |          |        |       |        |      | a       |      |          |         |           |         |          |           |
| -                         | 2309751                 | c                    | 2263267                   | t                | 2173186               | nc                | APEC/S88                    | rec19               | c                                    | S88                                   | +++                        | c      | c    | c   |          |         |       |        |      |           |    |          |        |       |        |      | c       |      |          |         |           |         |          |           |
| -                         | 2309751                 | c                    | 2263297                   | a                | 2173216               | nc                | APEC/S88                    | rec19               | c                                    | S88                                   | ++                         | c      | g    | a   |          |         |       |        |      |           |    |          |        |       |        |      | c       |      |          |         |           |         |          |           |
| -                         | 2309751                 | c                    | 2263339                   | t                | 2173258               | nc                | APEC/S88                    | rec19               | c                                    | S88                                   | ++                         | c      | g    | t   |          |         |       |        |      |           |    |          |        |       |        |      | t       |      |          |         |           |         |          |           |
| -                         | 2309751                 | a                    | 2263343                   | t                | 2173262               | nc                | APEC/S88                    | rec19               | t                                    | APEC                                  | +++                        | t      | c    | t   |          |         |       |        |      |           |    |          |        |       |        |      | t       |      |          |         |           |         |          |           |
| -                         | 2309751                 | c                    | 2263410                   | t                | 2173329               | nc                | APEC/S88                    | rec19               | c                                    | S88                                   | +++                        | c      | c    | c   |          |         |       |        |      |           |    |          |        |       |        |      | c       |      |          |         |           |         |          |           |
| -                         | 2309751                 | c                    | 2263417                   | t                | 2173336               | nc                | APEC/S88                    | rec19               | c                                    | S88                                   | +++                        | c      | g    | c   |          |         |       |        |      |           |    |          |        |       |        |      | c       |      |          |         |           |         |          |           |
| -                         | 2309751                 | c                    | 2263537                   | t                | 2173456               | nc                | APEC/S88                    | rec19               | t                                    | APEC                                  | +++                        | t      | t    | c   |          |         |       |        |      |           |    |          |        |       |        |      | t       |      |          |         |           |         |          |           |
| -                         | 2309751                 | g                    | 2263576                   | a                | 2173495               | nc                | APEC/S88                    | rec19               | g                                    | S88                                   | +++                        | g      | c    | g   |          |         |       |        |      |           |    |          |        |       |        |      | g       |      |          |         |           |         |          |           |
| -                         | 2309751                 | c                    | 2263618                   | g                | 2173537               | nc                | APEC/S88                    | rec19               | g                                    | APEC                                  | ++                         | g      | c    | c   |          |         |       |        |      |           |    |          |        |       |        |      | c       |      |          |         |           |         |          |           |
| -                         | 2309751                 | a                    | 2263624                   | g                | 2173543               | nc                | APEC/S88                    | rec19               | g                                    | APEC                                  | +++                        | g      | a    | g   |          |         |       |        |      |           |    |          |        |       |        |      | g       |      |          |         |           |         |          |           |
| -                         | 2309751                 | g                    | 2263678                   | a                | 2173597               | nc                | APEC/S88                    | rec19               | g                                    | S88                                   | +++                        | g      | g    | g   |          |         |       |        |      |           |    |          |        |       |        |      | g       |      |          |         |           |         |          |           |
| -                         | 2309751                 | g                    | 2263812                   | a                | 2173731               | nc                | APEC/S88                    | rec19               | g                                    | S88                                   | +++                        | g      | g    | g   |          |         |       |        |      |           |    |          |        |       |        |      | g       |      |          |         |           |         |          |           |
| -                         | 2309751                 | a                    | 2263901                   | g                | 2173820               | nc                | APEC/S88                    | rec19               | a                                    | S88                                   | +++                        | a      | g    | a   |          |         |       |        |      |           |    |          |        |       |        |      | a       |      |          |         |           |         |          |           |
| -                         | 2309751                 | c                    | 2263907                   | t                | 2173826               | nc                | APEC/S88                    | rec19               | c                                    | S88                                   | +++                        | c      | t    | c   |          |         |       |        |      |           |    |          |        |       |        |      | c       |      |          |         |           |         |          |           |
| -                         | 2309751                 | t                    | 2264056                   | c                | 2173975               | nc                | APEC/S88                    | rec19               | t                                    | S88                                   | ++                         | t      | t    | c   |          |         |       |        |      |           |    |          |        |       |        |      |         |      |          |         |           |         |          |           |
| -                         | 2309751                 | a                    | 2264059                   | g                | 2173978               | nc                | APEC/S88                    | rec19               | a                                    | S88                                   | ++                         | a      | g    | g   |          |         |       |        |      |           |    |          |        |       |        |      |         |      |          |         |           |         |          |           |
| -                         | 2309751                 | t                    | 2264083                   | c                | 2174002               | nc                | APEC/S88                    | rec19               | c                                    | APEC                                  | ++                         | c      | a    | c   |          |         |       |        |      |           |    |          |        |       |        |      |         |      |          |         |           |         |          |           |
| -                         | 2309751                 | c                    | 2264096                   | t                | 2174015               | nc                | APEC/S88                    | rec19               | t                                    | APEC                                  | ++                         | t      | c    | t   |          |         |       |        |      |           |    |          |        |       |        |      |         |      |          |         |           |         |          |           |
| -                         | 2309751                 | g                    | 2264098                   | a                | 2174017               | nc                | APEC/S88                    | rec19               | g                                    | S88                                   | ++                         | g      | c    | g   |          |         |       |        |      |           |    |          |        |       |        |      |         |      |          |         |           |         |          |           |
| -                         | 2309751                 | t                    | 2264140                   | c                | 2174059               | nc                | APEC/S88                    | rec19               | t                                    | S88                                   | ++                         | t      | c    | c   |          |         |       |        |      |           |    |          |        |       |        |      |         |      |          |         |           |         |          |           |
| -                         | 2309751                 | g                    | 2264164                   | c                | 2174083               | nc                | APEC/S88                    | rec19               | g                                    | S88                                   | ++                         | g      | g    | c   |          |         |       |        |      |           |    |          |        |       |        |      |         |      |          |         |           |         |          |           |
| -                         | 2309751                 | a                    | 2264202                   | g                | 2174121               | nc                | APEC/S88                    | rec19               | a                                    | S88                                   | ++                         | a      | c    | a   |          |         |       |        |      |           |    |          |        |       |        |      |         |      |          |         |           |         |          |           |
| -                         | 2309751                 | c                    | 2264214                   | t                | 2174133               | nc                | APEC/S88                    | rec19               | t                                    | APEC                                  | ++                         | t      | c    | t   |          |         |       |        |      |           |    |          |        |       |        |      |         |      |          |         |           |         |          |           |
| -                         | 2309751                 | a                    | 2264274                   | g                | 2174193               | nc                | APEC/S88                    | rec19               | g                                    | APEC                                  | ++                         | g      | g    | g   |          |         |       |        |      |           |    |          |        |       |        |      |         |      |          |         |           |         |          |           |
| -                         | 2309751                 | a                    | 2264313                   | g                | 2174232               | nc                | APEC/S88                    | rec19               | g                                    | APEC                                  | ++                         | g      | g    | g   |          |         |       |        |      |           |    |          |        |       |        |      |         |      |          |         |           |         |          |           |
| -                         | 2309751                 | a                    | 2264382                   | g                | 2174301               | nc                | APEC/S88                    | rec19               | g                                    | APEC                                  | ++                         | g      | g    | a   |          |         |       |        |      |           |    |          |        |       |        |      |         |      |          |         |           |         |          |           |
| -                         | 2309751                 | a                    | 2264400                   | g                | 2174319               | nc                | APEC/S88                    | rec19               | a                                    | S88                                   | ++                         | a      | g    | a   |          |         |       |        |      |           |    |          |        |       |        |      |         |      |          |         |           |         |          |           |
| -                         | 2309751                 | t                    | 2264445                   | c                | 2174364               | nc                | APEC/S88                    | rec19               | t                                    | S88                                   | ++                         | t      | c    | t   |          |         |       |        |      |           |    |          |        |       |        |      |         |      |          |         |           |         |          |           |
| -                         | 2309751                 | c                    | 2264505                   | t                | 2174424               | nc                | APEC/S88                    | rec19               | t                                    | APEC                                  | ++                         | t      | t    | c   |          |         |       |        |      |           |    |          |        |       |        |      |         |      |          |         |           |         |          |           |
| -                         | 2309751                 | c                    | 2264510                   | a                | 2174429               | nc                | APEC/S88                    | rec19               | c                                    | S88                                   | ++                         | c      | a    | c   |          |         |       |        |      |           |    |          |        |       |        |      |         |      |          |         |           |         |          |           |
| -                         | 2309751                 | c                    | 2264673                   | t                | 2174592               | nc                | APEC/S88                    | rec19               | c                                    | S88                                   | +++                        | c      | c    | c   |          |         |       |        |      |           |    |          |        |       |        |      |         |      |          |         |           |         |          |           |
| -                         | 2309751                 | t                    | 2264688                   | c                | 2174607               | nc                | APEC/S88                    | rec19               | t                                    | S88                                   | ++                         | t      | c    | t   |          |         |       |        |      |           |    |          |        |       |        |      | a       |      |          |         |           |         |          |           |
| -                         | 230975                  |                      |                           |                  |                       |                   |                             |                     |                                      |                                       |                            |        |      |     |          |         |       |        |      |           |    |          |        |       |        |      |         |      |          |         |           |         |          |           |

Page 17

| ExPEC genome site details |                         |                      |                           |                  |                       |                   |                             |                     |                                      | Outgroup Strains Details <sup>1</sup> |                            |        |      |     |           |         |       |        |      |           |    |          |        |       |        |      |         |      |          |         |           |         |          |           |
|---------------------------|-------------------------|----------------------|---------------------------|------------------|-----------------------|-------------------|-----------------------------|---------------------|--------------------------------------|---------------------------------------|----------------------------|--------|------|-----|-----------|---------|-------|--------|------|-----------|----|----------|--------|-------|--------|------|---------|------|----------|---------|-----------|---------|----------|-----------|
| UT189 <sup>b</sup>        | UT189 site <sup>c</sup> | APEC 01 <sup>b</sup> | APEC 01 site <sup>c</sup> | S88 <sup>b</sup> | S88 site <sup>c</sup> | type <sup>d</sup> | Event Lineage <sup>ef</sup> | Recombinant segment | Inferred ancestral base <sup>g</sup> | Outgroup Analysis <sup>e</sup>        | Support level <sup>h</sup> | CFT073 | ED1a | 536 | E23/48/69 | SMS 3-5 | IAI39 | UMN026 | K-12 | ATCC 8739 | HS | D1 Sd197 | CB9615 | Sakai | EDL933 | IAI1 | E24377A | SE11 | SS Ss046 | F2a 301 | F2a 2457T | F5 8401 | B4 Sp227 | B18 BS512 |
| -                         | 2309751                 | t                    | 2276776                   | c                | 2199827               | nc                | APEC/S88                    | rec19               | t                                    | S88                                   | +                          |        |      |     |           | t       |       |        |      |           |    |          |        |       |        |      | t       |      |          |         |           |         |          |           |
| -                         | 2309751                 | c                    | 2276816                   | g                | 2199867               | nc                | APEC/S88                    | rec19               | g                                    | APEC                                  | +                          |        |      |     | g         |         |       |        |      |           |    |          |        |       |        |      |         |      |          |         |           |         |          |           |
| -                         | 2309751                 | c                    | 2276819                   | a                | 2199870               | nc                | APEC/S88                    | rec19               | g                                    | S88                                   | +                          |        |      |     | c         |         |       |        |      |           |    |          |        |       |        |      | c       |      |          |         |           |         |          |           |
| -                         | 2309751                 | c                    | 2276825                   | t                | 2199876               | nc                | APEC/S88                    | rec19               | t                                    | APEC                                  | +                          |        |      |     | t         |         |       |        |      |           |    |          |        |       |        | t    |         |      |          |         |           |         |          |           |
| -                         | 2309751                 | t                    | 2276841                   | c                | 2199892               | nc                | APEC/S88                    | rec19               | c                                    | APEC                                  | +                          |        |      |     | c         |         |       |        |      |           |    |          |        |       |        | c    |         |      |          |         |           |         |          |           |
| -                         | 2309751                 | t                    | 2276842                   | c                | 2199893               | nc                | APEC/S88                    | rec19               | t                                    | S88                                   | +                          |        |      |     | t         |         |       |        |      |           |    |          |        |       |        | c    |         |      |          |         |           |         |          |           |
| -                         | 2309751                 | a                    | 2276857                   | g                | 2199908               | nc                | APEC/S88                    | rec19               | g                                    | APEC                                  | +                          |        |      |     | g         |         |       |        |      |           |    |          |        |       |        | g    |         |      |          |         |           |         |          |           |
| -                         | 2309751                 | c                    | 2276920                   | t                | 2199971               | nc                | APEC/S88                    | rec19               | t                                    | APEC                                  | +                          |        |      |     | t         |         |       |        |      |           |    |          |        |       |        | t    |         |      |          |         |           |         |          |           |
| -                         | 2309751                 | g                    | 2276956                   | a                | 2200007               | nc                | APEC/S88                    | rec19               | g                                    | S88                                   | +                          |        |      |     | g         |         |       |        |      |           |    |          |        |       |        | a    |         |      |          |         |           |         |          |           |
| -                         | 2309751                 | c                    | 2276958                   | t                | 2200009               | nc                | APEC/S88                    | rec19               | c                                    | S88                                   | +                          |        |      |     | c         |         |       |        |      |           |    |          |        |       |        | c    |         |      |          |         |           |         |          |           |
| -                         | 2309751                 | a                    | 2277028                   | c                | 2200079               | nc                | APEC/S88                    | rec19               | a                                    | S88                                   | +                          |        |      |     | a         |         |       |        |      |           |    |          |        |       |        | a    |         |      |          |         |           |         |          |           |
| -                         | 2309751                 | c                    | 2277037                   | a                | 2200088               | nc                | APEC/S88                    | rec19               | a                                    | APEC                                  | +                          |        |      |     | a         |         |       |        |      |           |    |          |        |       |        | a    |         |      |          |         |           |         |          |           |
| -                         | 2309751                 | t                    | 2277088                   | c                | 2200139               | nc                | APEC/S88                    | rec19               | c                                    | APEC                                  | +                          |        |      |     | c         |         |       |        |      |           |    |          |        |       |        | c    |         |      |          |         |           |         |          |           |
| -                         | 2309751                 | c                    | 2277130                   | t                | 2200181               | nc                | APEC/S88                    | rec19               | t                                    | APEC                                  | +                          |        |      |     | t         |         |       |        |      |           |    |          |        |       |        | t    |         |      |          |         |           |         |          |           |
| -                         | 2309751                 | c                    | 2277133                   | t                | 2200184               | nc                | APEC/S88                    | rec19               | t                                    | APEC                                  | +                          |        |      |     | t         |         |       |        |      |           |    |          |        |       |        | t    |         |      |          |         |           |         |          |           |
| -                         | 2309751                 | g                    | 2277151                   | t                | 2200202               | nc                | APEC/S88                    | rec19               | g                                    | S88                                   | +                          |        |      |     | g         |         |       |        |      |           |    |          |        |       |        | g    |         |      |          |         |           |         |          |           |
| -                         | 2309751                 | c                    | 2277175                   | t                | 2200226               | nc                | APEC/S88                    | rec19               | c                                    | S88                                   | +                          |        |      |     | c         |         |       |        |      |           |    |          |        |       |        | c    |         |      |          |         |           |         |          |           |
| -                         | 2309751                 | a                    | 2277187                   | g                | 2200238               | nc                | APEC/S88                    | rec19               | a                                    | S88                                   | +                          |        |      |     | a         |         |       |        |      |           |    |          |        |       |        | a    |         |      |          |         |           |         |          |           |
| -                         | 2309751                 | g                    | 2277199                   | a                | 2200250               | nc                | APEC/S88                    | rec19               | g                                    | S88                                   | +                          |        |      |     | g         |         |       |        |      |           |    |          |        |       |        | g    |         |      |          |         |           |         |          |           |
| -                         | 2309751                 | g                    | 2277211                   | a                | 2200262               | nc                | APEC/S88                    |                     |                                      |                                       |                            |        |      |     |           |         |       |        |      |           |    |          |        |       |        |      |         |      |          |         |           |         |          |           |

| ExPEC genome site details |                         |                      |                           |                  |                       |                   |                             |                     |                                      | Outgroup Strains Details <sup>1</sup> |                            |        |      |     |          |         |      |        |      |           |    |          |        |       |        |     |         |      |          |         |           |         |          |           |
|---------------------------|-------------------------|----------------------|---------------------------|------------------|-----------------------|-------------------|-----------------------------|---------------------|--------------------------------------|---------------------------------------|----------------------------|--------|------|-----|----------|---------|------|--------|------|-----------|----|----------|--------|-------|--------|-----|---------|------|----------|---------|-----------|---------|----------|-----------|
| UT189 <sup>b</sup>        | UT189 site <sup>c</sup> | APEC 01 <sup>b</sup> | APEC 01 site <sup>c</sup> | S88 <sup>b</sup> | S88 site <sup>c</sup> | type <sup>d</sup> | Event Lineage <sup>ef</sup> | Recombinant segment | Inferred ancestral base <sup>g</sup> | Outgroup Analysis <sup>e</sup>        | Support level <sup>h</sup> | CFT073 | ED1a | 536 | E2348/69 | SMS 3-5 | IA39 | UMN026 | K-12 | ATCC 8739 | HS | D1 Sd197 | CB9615 | Sakai | EDL933 | IA1 | E24377A | SE11 | SS Ss046 | F2a 301 | F2a 2457T | F5 8401 | B4 Sb227 | B18 BS512 |
| -                         | 2309751                 | a                    | 2279586                   | g                | 2202637               | nc                | APEC/S88                    | rec19               | g                                    | APEC                                  | +                          |        |      |     | g        |         |      |        |      |           |    |          |        |       |        |     |         |      |          |         |           |         |          |           |
| -                         | 2309751                 | t                    | 2279589                   | g                | 2202640               | nc                | APEC/S88                    | rec19               | g                                    | APEC                                  | +                          |        |      |     | g        |         |      |        |      |           |    |          |        |       |        |     |         |      |          |         |           |         |          |           |
| -                         | 2309751                 | c                    | 2279619                   | t                | 2202670               | nc                | APEC/S88                    | rec19               | t                                    | APEC                                  | +                          |        |      |     | t        |         |      |        |      |           |    |          |        |       |        |     |         |      |          |         |           |         |          |           |
| -                         | 2309751                 | c                    | 2279623                   | t                | 2202674               | nc                | APEC/S88                    | rec19               | c                                    | S88                                   | +                          |        |      |     | c        |         |      |        |      |           |    |          |        |       |        |     |         |      |          |         |           |         |          |           |
| -                         | 2309751                 | c                    | 2279642                   | t                | 2202693               | nc                | APEC/S88                    | rec19               | c                                    | S88                                   | +                          |        |      |     | c        |         |      |        |      |           |    |          |        |       |        |     |         |      |          |         |           |         |          |           |
| -                         | 2309751                 | a                    | 2279780                   | c                | 2202831               | nc                | APEC/S88                    | rec19               | t                                    | A/S                                   | +/-                        |        |      |     | t        |         |      |        |      |           |    |          |        |       |        |     |         |      |          |         |           |         |          |           |
| -                         | 2309751                 | c                    | 2279806                   | t                | 2202857               | nc                | APEC/S88                    | rec19               | c                                    | S88                                   | +                          |        |      |     | c        |         |      |        |      |           |    |          |        |       |        |     |         |      |          |         |           |         |          |           |
| -                         | 2309751                 | t                    | 2279812                   | g                | 2202863               | nc                | APEC/S88                    | rec19               | g                                    | APEC                                  | +                          |        |      |     | g        |         |      |        |      |           |    |          |        |       |        |     |         |      |          |         |           |         |          |           |
| -                         | 2309751                 | t                    | 2279832                   | c                | 2202883               | nc                | APEC/S88                    | rec19               | c                                    | APEC                                  | +                          |        |      |     | c        |         |      |        |      |           |    |          |        |       |        |     |         |      |          |         |           |         |          |           |
| -                         | 2309751                 | g                    | 2279892                   | a                | 2202943               | nc                | APEC/S88                    | rec19               | g                                    | S88                                   | +                          |        |      |     | g        |         |      |        |      |           |    |          |        |       |        |     |         |      |          |         |           |         |          |           |
| -                         | 2309751                 | a                    | 2279906                   | g                | 2202957               | nc                | APEC/S88                    | rec19               | a                                    | S88                                   | +                          |        |      |     | a        |         |      |        |      |           |    |          |        |       |        |     |         |      |          |         |           |         |          |           |
| -                         | 2309751                 | a                    | 2279919                   | c                | 2202970               | nc                | APEC/S88                    | rec19               | a                                    | S88                                   | +                          |        |      |     | a        |         |      |        |      |           |    |          |        |       |        |     |         |      |          |         |           |         |          |           |
| -                         | 2309751                 | t                    | 2279923                   | c                | 2202974               | nc                | APEC/S88                    | rec19               | c                                    | APEC                                  | +                          |        |      |     | c        |         |      |        |      |           |    |          |        |       |        |     |         |      |          |         |           |         |          |           |
| -                         | 2309751                 | c                    | 2279954                   | t                | 2203005               | nc                | APEC/S88                    | rec19               | c                                    | S88                                   | +                          |        |      |     | c        |         |      |        |      |           |    |          |        |       |        |     |         |      |          |         |           |         |          |           |
| -                         | 2309751                 | t                    | 2279990                   | c                | 2203041               | nc                | APEC/S88                    | rec19               | t                                    | S88                                   | +                          |        |      |     | t        |         |      |        |      |           |    |          |        |       |        |     |         |      |          |         |           |         |          |           |
| -                         | 2309751                 | t                    | 2280047                   | g                | 2203098               | nc                | APEC/S88                    | rec19               | t                                    | S88                                   | +                          |        |      |     | t        |         |      |        |      |           |    |          |        |       |        |     |         |      |          |         |           |         |          |           |
| -                         | 2309751                 | t                    | 2280056                   | c                | 2203107               | nc                | APEC/S88                    | rec19               | t                                    | S88                                   | +                          |        |      |     | t        |         |      |        |      |           |    |          |        |       |        |     |         |      |          |         |           |         |          |           |
| -                         | 2309751                 | g                    | 2280062                   | a                | 2203113               | nc                | APEC/S88                    | rec19               | g                                    | S88                                   | +                          |        |      |     | g        |         |      |        |      |           |    |          |        |       |        |     |         |      |          |         |           |         |          |           |
| -                         | 2309751                 | a                    | 2280065                   | g                | 2203116               | nc                | APEC/S88                    | rec19               | g                                    | APEC                                  | +                          |        |      |     | g        |         |      |        |      |           |    |          |        |       |        |     |         |      |          |         |           |         |          |           |
| -                         | 2309751                 | g                    | 2280082                   | a                | 2203133               | nc                | APEC/S88                    | rec19               | g                                    | S88                                   | +                          |        |      |     | g        |         |      |        |      |           |    |          |        |       |        |     |         |      |          |         |           |         |          |           |
| -                         | 2309751                 | g                    | 2280085                   | c                | 2203136               | nc                | APEC/S88                    | rec19               | g                                    | S88                                   | +                          |        |      |     | g        |         |      |        |      |           |    |          |        |       |        |     |         |      |          |         |           |         |          |           |
| -                         | 2309751                 | t                    | 2280086                   | c                | 2203137               | nc                | APEC/S88                    | rec19               | t                                    | S88                                   | +                          |        |      |     | t        |         |      |        |      |           |    |          |        |       |        |     |         |      |          |         |           |         |          |           |
| -                         | 2309751                 | g                    | 2280089                   | a                | 2203140               | nc                | APEC/S88                    | rec19               | g                                    | S88                                   | +                          |        |      |     | g        |         |      |        |      |           |    |          |        |       |        |     |         |      |          |         |           |         |          |           |
| -                         | 2309751                 | g                    | 2280104                   | a                | 2203155               | nc                | APEC/S88                    | rec19               | g                                    | S88                                   | +                          |        |      |     | g        |         |      |        |      |           |    |          |        |       |        |     |         |      |          |         |           |         |          |           |
| -                         | 2309751                 | g                    | 2280152                   | a                | 2203203               | nc                | APEC/S88                    | rec19               | g                                    | S88                                   | +                          |        |      |     | g        |         |      |        |      |           |    |          |        |       |        |     |         |      |          |         |           |         |          |           |
| -                         | 2309751                 | a                    | 2280155                   | g                | 2203206               | nc                | APEC/S88                    | rec19               | a                                    | S88                                   | +                          |        |      |     | a        |         |      |        |      |           |    |          |        |       |        |     |         |      |          |         |           |         |          |           |
| -                         | 2309751                 | a                    | 2280187                   | g                | 2203238               | nc                | APEC/S88                    | rec19               | a                                    | S88                                   | +                          |        |      |     | a        |         |      |        |      |           |    |          |        |       |        |     |         |      |          |         |           |         |          |           |
| -                         | 2309751                 | t                    | 2280203                   | a                | 2203254               | nc                | APEC/S88                    | rec19               | a                                    | APEC                                  | +                          |        |      |     | a        |         |      |        |      |           |    |          |        |       |        |     |         |      |          |         |           |         |          |           |
| -                         | 2309751                 | t                    | 2280209                   | c                | 2203260               | nc                | APEC/S88                    | rec19               | t                                    | S88                                   | +                          |        |      |     | t        |         |      |        |      |           |    |          |        |       |        |     |         |      |          |         |           |         |          |           |
| -                         | 2309751                 | c                    | 2280260                   | t                | 2203311               | nc                | APEC/S88                    | rec19               | c                                    | S88                                   | +                          |        |      |     | c        |         |      |        |      |           |    |          |        |       |        |     |         |      |          |         |           |         |          |           |
| -                         | 2309751                 | g                    | 2280278                   | a                | 2203329               | nc                | APEC/S88                    | rec19               | a                                    | APEC                                  | +                          |        |      |     | a        |         |      |        |      |           |    |          |        |       |        |     |         |      |          |         |           |         |          |           |
| -                         | 2309751                 | a                    | 2280299                   | g                | 2203350               | nc                | APEC/S88                    | rec19               | g                                    | APEC                                  | +                          |        |      |     | g        |         |      |        |      |           |    |          |        |       |        |     |         |      |          |         |           |         |          |           |
| -                         | 2309751                 | t                    | 2280302                   | c                | 2203353               | nc                | APEC/S88                    | rec19               | c                                    | APEC                                  | +                          |        |      |     | c        |         |      |        |      |           |    |          |        |       |        |     |         |      |          |         |           |         |          |           |
| -                         | 2309751                 | g                    | 2280326                   | a                | 2203377               | nc                | APEC/S88                    | rec19               | a                                    | APEC                                  | +                          |        |      |     | a        |         |      |        |      |           |    |          |        |       |        |     |         |      |          |         |           |         |          |           |
| -                         | 2309751                 | c                    | 2280353                   | a                | 2203404               | nc                | APEC/S88                    | rec19               | a                                    | APEC                                  | +                          |        |      |     | a        |         |      |        |      |           |    |          |        |       |        |     |         |      |          |         |           |         |          |           |
| -                         | 2309751                 | a                    | 2280362                   | g                | 2203413               | nc                | APEC/S88                    | rec19               | g                                    | APEC                                  | +                          |        |      |     | g        |         |      |        |      |           |    |          |        |       |        |     |         |      |          |         |           |         |          |           |
| -                         | 2309751                 | g                    | 2280380                   | a                | 2203431               | nc                | APEC/S88                    | rec19               | a                                    | APEC                                  | +                          |        |      |     | a        |         |      |        |      |           |    |          |        |       |        |     |         |      |          |         |           |         |          |           |
| -                         | 2309751                 | t                    | 2280382                   | c                | 2203433               | nc                | APEC/S88                    | rec19               | c                                    | APEC                                  | +                          |        |      |     | c        |         |      |        |      |           |    |          |        |       |        |     |         |      |          |         |           |         |          |           |
| -                         | 2309751                 | a                    | 2280398                   | g                | 2203449               | nc                | APEC/S88                    | rec19               | a                                    | S88                                   | +                          |        |      |     | a        |         |      |        |      |           |    |          |        |       |        |     |         |      |          |         |           |         |          |           |
| -                         | 2309751                 | t                    | 2280430                   | g                | 2203481               | nc                | APEC/S88                    | rec19               | g                                    | APEC                                  | +                          |        |      |     | g        |         |      |        |      |           |    |          |        |       |        |     |         |      |          |         |           |         |          |           |
| -                         | 2309751                 | t                    | 2280463                   | c                | 2203514               | nc                | APEC/S88                    | rec19               | t                                    | S88                                   | +                          |        |      |     | t        |         |      |        |      |           |    |          |        |       |        |     |         |      |          |         |           |         |          |           |
| -                         | 2309751                 | g                    | 2280505                   | a                | 2203556               | nc                | APEC/S88                    | rec19               | a                                    | APEC                                  | +                          |        |      |     | a        |         |      |        |      |           |    |          |        |       |        |     |         |      |          |         |           |         |          |           |
| -                         | 2309751                 | t                    | 2280508                   | c                | 2203559               | nc                | APEC/S88                    | rec19               | c                                    | APEC                                  | +                          |        |      |     | c        |         |      |        |      |           |    |          |        |       |        |     |         |      |          |         |           |         |          |           |
| -                         | 2309751                 | c                    | 2280514                   | a                | 2203565               | nc                | APEC/S88                    | rec19               | a                                    | APEC                                  | +                          |        |      |     | a        |         |      |        |      |           |    |          |        |       |        |     |         |      |          |         |           |         |          |           |
| -                         | 2309751                 | a                    | 2280529                   | g                | 2203580               | nc                | APEC/S88                    | rec19               | g                                    | APEC                                  | +                          |        |      |     | g        |         |      |        |      |           |    |          |        |       |        |     |         |      |          |         |           |         |          |           |
| -                         | 2309751                 | t                    | 2280967                   | c                | 2204018               | nc                | APEC/S88                    | rec19               | ?                                    | A/S                                   | +/-                        |        |      |     |          |         |      |        |      |           |    |          |        |       |        |     |         |      |          |         |           |         |          |           |
| -                         | 2309751                 | c                    | 2280974                   | t                | 2204025               | nc                | APEC/S88                    | rec19               | ?                                    | A/S                                   | +/-                        |        |      |     |          |         |      |        |      |           |    |          |        |       |        |     |         |      |          |         |           |         |          |           |
| -                         | 2309751                 | t                    | 2281297                   | c                | 2204348               | nc                | APEC/S88                    | rec19               | ?                                    | S88                                   | +/-                        |        |      |     |          |         |      |        |      |           |    |          |        |       |        |     |         |      |          |         |           |         |          |           |
| -                         | 2309751                 | a                    | 2281374                   | c                | 2204425               | nc                | APEC/S88                    | rec19               | ?                                    | S88                                   | +/-                        |        |      |     |          |         |      |        |      |           |    |          |        |       |        |     |         |      |          |         |           |         |          |           |
| -                         | 2309751                 | a                    | 2281384                   | c                | 2204435               | nc                | APEC/S88                    | rec19               | ?                                    | S88                                   | +/-                        |        |      |     |          |         |      |        |      |           |    |          |        |       |        |     |         |      |          |         |           |         |          |           |
| -                         | 2309751                 | g                    | 2281385                   | a                | 2204436               | nc                | APEC/S88                    | rec19               | ?                                    | S88                                   | +/-                        |        |      |     |          |         |      |        |      |           |    |          |        |       |        |     |         |      |          |         |           |         |          |           |
| -                         | 2309751                 | t                    | 2281386                   | c                | 2204437               | nc                | APEC/S88                    | rec19               | ?                                    | S88                                   | +/-                        |        |      |     |          |         |      |        |      |           |    |          |        |       |        |     |         |      |          |         |           |         |          |           |
| -                         | 2309751                 | c                    | 2281469                   | t                | 2204520               | nc                | APEC/S88                    | rec19               | ?                                    | S88                                   | +/-                        |        |      |     |          |         |      |        |      |           |    |          |        |       |        |     |         |      |          |         |           |         |          |           |
| -                         | 2309751                 | a                    | 2281523                   | g                | 2204574               | nc                | APEC/S88                    | rec19               | ?                                    | S88                                   | +/-                        |        |      |     |          |         |      |        |      |           |    |          |        |       |        |     |         |      |          |         |           |         |          |           |
| -                         | 2309751                 | a                    | 2281580                   | g                | 2204631               | nc                | APEC/S88                    | rec19               | ?                                    | S88                                   | +/-                        |        |      |     |          |         |      |        |      |           |    |          |        |       |        |     |         |      |          |         |           |         |          |           |
| -                         | 2309751                 | a                    | 2281595                   | g                | 2204646               | nc                | APEC/S88                    | rec19               | ?                                    | S88                                   | +/-                        |        |      |     |          |         |      |        |      |           |    |          |        |       |        |     |         |      |          |         |           |         |          |           |
| -                         | 2309751                 | g                    | 2281689                   | a                | 2204740               | nc                | APEC/S88                    | rec19               | ?                                    | S88                                   | +/-                        |        |      |     |          |         |      |        |      |           |    |          |        |       |        |     |         |      |          |         |           |         |          |           |
| -                         | 2309751                 | c                    | 2281709                   | t                | 2204760               | nc                | APEC/S88                    | rec19               | ?                                    | S88                                   | +/-                        |        |      |     |          |         |      |        |      |           |    |          |        |       |        |     |         |      |          |         |           |         |          |           |
| -                         | 2309751                 | c                    | 2281718                   | g                | 2204769               | nc                | APEC/S88                    | rec19               | ?                                    | S88                                   | +/-                        |        |      |     |          |         |      |        |      |           |    |          |        |       |        |     |         |      |          |         |           |         |          |           |
| -                         | 2309751                 | c                    | 2281751                   | t                | 2204802               | nc                | APEC/S88                    | rec19               | ?                                    | APEC                                  | +/-                        |        |      |     |          |         |      |        |      |           |    |          |        |       |        |     |         |      |          |         |           |         |          |           |
| -                         | 2309751                 | g                    | 2281865                   | a                | 2204916               | nc                | APEC/S88                    | rec19               | ?                                    | S88                                   | +/-                        |        |      |     |          |         |      |        |      |           |    |          |        |       |        |     |         |      |          |         |           |         |          |           |
| -                         | 2309751                 | a                    | 2281889                   | c                | 2204940               | nc                | APEC/S88                    | rec19               | ?</                                  |                                       |                            |        |      |     |          |         |      |        |      |           |    |          |        |       |        |     |         |      |          |         |           |         |          |           |

| ExPEC genome site details |                         |                      |                           |                  |                       |                   |                             |                     |                                      | Outgroup Strains Details <sup>1</sup> |                            |        |      |     |          |         |       |        |      |           |    |          |        |       |        |      |         |      |          |         |            |         |          |           |
|---------------------------|-------------------------|----------------------|---------------------------|------------------|-----------------------|-------------------|-----------------------------|---------------------|--------------------------------------|---------------------------------------|----------------------------|--------|------|-----|----------|---------|-------|--------|------|-----------|----|----------|--------|-------|--------|------|---------|------|----------|---------|------------|---------|----------|-----------|
| UTI89 <sup>b</sup>        | UTI89 site <sup>c</sup> | APEC 01 <sup>b</sup> | APEC 01 site <sup>c</sup> | S88 <sup>b</sup> | S88 site <sup>c</sup> | type <sup>d</sup> | Event Lineage <sup>ef</sup> | Recombinant segment | Inferred ancestral base <sup>g</sup> | Outgroup Analysis <sup>e</sup>        | Support level <sup>h</sup> | CFT073 | ED1a | 536 | E2348/69 | SMS 3-5 | IAI39 | UMN026 | K-12 | ATCC 8739 | HS | D1 Sd197 | CB9615 | Sakai | EDL933 | IAI1 | E2437/A | SE11 | SS Ss046 | F2a 301 | F2a 245/7T | F5 8401 | B4 Sb227 | B18 BS512 |
| t                         | 2613373                 | c                    | 2586599                   | c                | 2509696               | s                 | UTI89/AS                    | rec21               | c                                    | UTI89                                 | +                          |        |      |     |          |         |       |        |      |           | c  |          |        |       |        |      |         |      |          |         |            |         |          |           |
| a                         | 2613391                 | c                    | 2586617                   | c                | 2509714               | s                 | UTI89/AS                    | rec21               | c                                    | UTI89                                 | +                          |        |      |     |          |         |       |        |      |           |    |          |        |       |        |      |         |      |          |         |            |         |          |           |
| c                         | 2613637                 | t                    | 2586863                   | t                | 2509960               | ns                | UTI89/AS                    | rec21               | t                                    | UTI89                                 | +                          |        |      |     |          |         |       |        |      |           |    | c        |        |       |        |      |         |      |          |         |            |         |          |           |
| a                         | 2613659                 | g                    | 2586885                   | g                | 2509982               | s                 | UTI89/AS                    | rec21               | a                                    | AS                                    | +                          |        |      |     |          |         |       |        |      |           |    | a        |        |       |        |      |         |      |          |         |            |         |          |           |
| a                         | 2613677                 | t                    | 2586903                   | t                | 2510000               | s                 | UTI89/AS                    | rec21               | a                                    | AS                                    | +                          |        |      |     |          |         |       |        |      |           |    | a        |        |       |        |      |         |      |          |         |            |         |          |           |
| g                         | 2613754                 | a                    | 2586980                   | a                | 2510077               | s                 | UTI89/AS                    | rec21               | g                                    | AS                                    | +                          |        |      |     |          |         |       |        |      |           |    | g        |        |       |        |      |         |      |          |         |            |         |          |           |
| a                         | 2613784                 | c                    | 2587010                   | c                | 2510107               | s                 | UTI89/AS                    | rec21               | a                                    | AS                                    | +                          |        |      |     |          |         |       |        |      |           |    | a        |        |       |        |      |         |      |          |         |            |         |          |           |
| a                         | 2613817                 | c                    | 2587043                   | c                | 2510140               | s                 | UTI89/AS                    | rec21               | c                                    | UTI89                                 | +                          |        |      |     |          |         |       |        |      |           |    | c        |        |       |        |      |         |      |          |         |            |         |          |           |
| c                         | 2613849                 | a                    | 2587075                   | a                | 2510172               | ns                | UTI89/AS                    | rec21               | c                                    | AS                                    | +                          |        |      |     |          |         |       |        |      |           |    | c        |        |       |        |      |         |      |          |         |            |         |          |           |
| a                         | 2613850                 | g                    | 2587076                   | g                | 2510173               | s                 | UTI89/AS                    | rec21               | g                                    | UTI89                                 | +                          |        |      |     |          |         |       |        |      |           |    | g        |        |       |        |      |         |      |          |         |            |         |          |           |
| t                         | 2613913                 | a                    | 2587139                   | a                | 2510236               | s                 | UTI89/AS                    | rec21               | a                                    | UTI89                                 | +                          |        |      |     |          |         |       |        |      |           |    | a        |        |       |        |      |         |      |          |         |            |         |          |           |
| c                         | 2613916                 | t                    | 2587142                   | t                | 2510239               | s                 | UTI89/AS                    | rec21               | c                                    | AS                                    | +                          |        |      |     |          |         |       |        |      |           |    | c        |        |       |        |      |         |      |          |         |            |         |          |           |
| t                         | 2613922                 | c                    | 2587148                   | c                | 2510245               | s                 | UTI89/AS                    | rec21               | c                                    | UTI89                                 | +                          |        |      |     |          |         |       |        |      |           |    | c        |        |       |        |      |         |      |          |         |            |         |          |           |
| c                         | 2613943                 | t                    | 2587169                   | t                | 2510266               | s                 | UTI89/AS                    | rec21               | t                                    | UTI89                                 | +                          |        |      |     |          |         |       |        |      |           |    | t        |        |       |        |      |         |      |          |         |            |         |          |           |
| g                         | 2613967                 | c                    | 2587193                   | c                | 2510290               | s                 | UTI89/AS                    | rec21               | c                                    | UTI89                                 | +                          |        |      |     |          |         |       |        |      |           |    | c        |        |       |        |      |         |      |          |         |            |         |          |           |
| g                         | 2614372                 | a                    | 2587598                   | a                | 2510695               | s                 | UTI89/AS                    | rec21               | g                                    | AS                                    | +                          |        |      |     |          |         |       |        |      |           |    | g        |        |       |        |      |         |      |          |         |            |         |          |           |
| c                         | 2614378                 | a                    | 2587604                   | a                | 2510701               | s                 | UTI89/AS                    | rec21               | c                                    | AS                                    | +                          |        |      |     |          |         |       |        |      |           |    | c        |        |       |        |      |         |      |          |         |            |         |          |           |
| t                         | 2614393                 | c                    | 2587619                   | c                | 2510716               | s                 | UTI89/AS                    | rec21               | t                                    | AS                                    | +                          |        |      |     |          |         |       |        |      |           |    | t        |        |       |        |      |         |      |          |         |            |         |          |           |
| a                         | 2614432                 | g                    | 2587658                   | g                | 2510755               | s                 | UTI89/AS                    | rec21               | a                                    | AS                                    | +                          |        |      |     |          |         |       |        |      |           |    | a        |        |       |        |      |         |      |          |         |            |         |          |           |
| a                         | 2614438                 | t                    | 2587664                   | t                | 2510761               | s                 | UTI89/AS                    | rec21               | a                                    | AS                                    |                            |        |      |     |          |         |       |        |      |           |    |          |        |       |        |      |         |      |          |         |            |         |          |           |





| ExPEC genome site details |                         |                      |                           |                  |                       |                   |                             |                     |                                      | Outgroup Strains Details <sup>1</sup> |                            |        |      |     |          |         |      |        |      |           |    |          |        |       |        |     |         |      |          |         |           |         |          |           |
|---------------------------|-------------------------|----------------------|---------------------------|------------------|-----------------------|-------------------|-----------------------------|---------------------|--------------------------------------|---------------------------------------|----------------------------|--------|------|-----|----------|---------|------|--------|------|-----------|----|----------|--------|-------|--------|-----|---------|------|----------|---------|-----------|---------|----------|-----------|
| UT189 <sup>b</sup>        | UT189 site <sup>c</sup> | APEC 01 <sup>b</sup> | APEC 01 site <sup>c</sup> | S88 <sup>b</sup> | S88 site <sup>c</sup> | type <sup>d</sup> | Event Lineage <sup>ef</sup> | Recombinant segment | Inferred ancestral base <sup>g</sup> | Outgroup Analysis <sup>h</sup>        | Support level <sup>h</sup> | CFT073 | ED1a | 536 | E2348/69 | SMS 3-5 | IA39 | UMN026 | K-12 | ATCC 8739 | HS | D1 Sd197 | CB9615 | Sakai | EDL933 | IA1 | E24377A | SE11 | SS Ss046 | F2a 301 | F2a 2457T | F5 8401 | B4 Sb227 | B18 BS512 |
| -                         | 4456561                 | 1                    | 4488585                   | 1                | 4403235               | ins               | AS                          | rec33               | -                                    | AS                                    | ++++                       | -      | -    | -   | -        | -       | -    | -      | -    | -         | -  | -        | -      | -     | -      | -   | -       | -    | -        | -       | -         | -       | -        |           |
| -                         | 4456652                 | 1                    | 4488668                   | -                | 4403317               | ins               | APEC                        | rec33               | -                                    | APEC                                  | ++++                       | -      | -    | -   | -        | -       | -    | -      | -    | -         | -  | -        | -      | -     | -      | -   | -       | -    | -        | -       | -         | -       | -        |           |
| g                         | 4456760                 | c                    | 4488776                   | g                | 4403425               | nc                | APEC                        | rec33               | g                                    | APEC                                  | ++++                       | g      | g    | g   | g        | g       | g    | g      | g    | g         | g  | g        | g      | g     | g      | g   | g       | g    | g        | g       | g         | g       | g        |           |
| g                         | 4456768                 | c                    | 4488784                   | g                | 4403433               | nc                | APEC                        | rec33               | g                                    | APEC                                  | ++++                       | g      | g    | g   | g        | g       | g    | g      | g    | g         | g  | g        | g      | g     | g      | g   | g       | g    | g        | g       | g         | g       | g        |           |
| -                         | 4456788                 | 1                    | 4488805                   | -                | 4403453               | ins               | APEC                        | rec33               | -                                    | APEC                                  | ++++                       | -      | -    | -   | -        | -       | -    | -      | -    | -         | -  | -        | -      | -     | -      | -   | -       | -    | -        | -       | -         | -       | -        |           |
| -                         | 4456805                 | 1                    | 4488823                   | -                | 4403470               | ins               | APEC                        | rec33               | -                                    | APEC                                  | ++++                       | -      | -    | -   | -        | -       | -    | -      | -    | -         | -  | -        | -      | -     | -      | -   | -       | -    | -        | -       | -         | -       | -        |           |
| g                         | 4456808                 | a                    | 4488826                   | g                | 4403473               | nc                | APEC                        | rec33               | g                                    | APEC                                  | ++++                       | g      | g    | g   | g        | g       | g    | g      | g    | g         | g  | g        | g      | g     | g      | g   | g       | g    | g        | g       | g         | g       | g        |           |
| -                         | 4456813                 | 1                    | 4488832                   | -                | 4403478               | ins               | APEC                        | rec33               | -                                    | APEC                                  | ++++                       | -      | -    | -   | -        | -       | -    | -      | -    | -         | -  | -        | -      | -     | -      | -   | -       | -    | -        | -       | -         | -       | -        |           |
| -                         | 4456821                 | 1                    | 4488841                   | -                | 4403486               | ins               | APEC                        | rec33               | -                                    | APEC                                  | ++++                       | -      | -    | -   | -        | -       | -    | -      | -    | -         | -  | -        | -      | -     | -      | -   | -       | -    | -        | -       | -         | -       | -        |           |
| 1                         | 4457618                 | -                    | 4489637                   | 1                | 4404283               | del               | APEC                        | rec33               | 1                                    | APEC                                  | ++++                       | 1      | 1    | 1   | 1        | 1       | 1    | 1      | 1    | 1         | 1  | 1        | 1      | 1     | 1      | 1   | 1       | 1    | 1        | 1       | 1         | 1       | 1        |           |
| -                         | 4457633                 | 1                    | 4489653                   | -                | 4404298               | ins               | APEC                        | rec33               | 1                                    | 2                                     | -                          | 1      | -    | 1   | -        | -       | -    | -      | -    | -         | -  | -        | -      | -     | -      | -   | -       | -    | -        | -       | -         | -       | -        |           |
| a                         | 4457672                 | g                    | 4489692                   | a                | 4404337               | s                 | APEC                        | rec33               | a                                    | APEC                                  | ++                         | t      | a    | t   | a        | a       | a    | a      | a    | a         | a  | a        | a      | a     | a      | a   | a       | a    | a        | a       | a         | a       | a        |           |
| -                         | 4457672                 | 2                    | 4489693                   | -                | 4404337               | ins               | APEC                        | rec33               | 2                                    | 2                                     | -                          | 2      | -    | 2   | -        | -       | -    | -      | -    | -         | -  | -        | -      | -     | -      | -   | -       | -    | -        | -       | -         | -       | -        |           |
| -                         | 4457696                 | 1                    | 4489719                   | -                | 4404361               | ins               | APEC                        | rec33               | 1                                    | 2                                     | -                          | 1      | -    | 1   | -        | -       | -    | -      | -    | -         | -  | -        | -      | -     | -      | -   | -       | -    | -        | -       | -         | -       | -        |           |
| g                         | 4457709                 | c                    | 4489732                   | g                | 4404374               | s                 | APEC                        | rec33               | c                                    | 2                                     | -                          | c      | g    | c   | g        | g       | g    | g      | g    | g         | g  | g        | g      | g     | g      | g   | g       | g    | g        | g       | g         | g       | g        |           |
| -                         | 4457713                 | 1                    | 4489737                   | -                | 4404378               | ins               | APEC                        | rec33               | 1                                    | 2                                     | -                          | 1      | -    | 1   | -        | -       | -    | -      | -    | -         | -  | -        | -      | -     | -      | -   | -       | -    | -        | -       | -         | -       | -        |           |
| -                         | 4457735                 | 2                    | 4489760                   | -                | 4404400               | ins               | APEC                        | rec33               | 2                                    | 2                                     | -                          | 2      | -    | 2   | -        | -       | -    | -      | -    | -         | -  | -        | -      | -     | -      | -   | -       | -    | -        | -       | -         | -       | -        |           |
| -                         | 4457741                 | 1                    | 4489768                   | -                | 4404406               | ins               | APEC                        | rec33               | 1                                    | 2                                     | -                          | 1      | -    | 1   | -        | -       | -    | -      | -    | -         | -  | -        | -      | -     | -      | -   | -       | -    | -        | -       | -         | -       | -        |           |
| 1                         | 4457753                 | -                    | 4489779                   | 1                | 4404418               | del               | APEC                        | rec33               | 1                                    | APEC                                  | ++++                       | 1      | 1    | 1   | 1        | 1       | 1    | 1      | 1    | 1         | 1  | 1        | 1      | 1     | 1      | 1   | 1       | 1    | 1        | 1       | 1         | 1       | 1        |           |
| a                         | 4457762                 | c                    | 4489788                   | a                | 4404427               | ns                | APEC                        | rec33               | c                                    | 2                                     | -                          | c      | a    | c   | a        | a       | a    | a      | a    | a         | a  | a        | a      | a     | a      | a   | a       | a    | a        | a       | a         | a       | a        |           |
| c                         | 4457929                 | t                    | 4489955                   | c                | 4404594               | nc                | APEC                        | rec33               | t                                    | 2                                     | -                          | t      | a    | t   | c        | a       | c    | c      | t    | t         | a  | a        | c      | c     | c      | a   | a       | c    | c        | t       | t         | t       | c        | c         |
| t                         | 4791161                 | c                    | 3318053                   | c                | 3232837               | ns                | UT189/AS                    | rec34               | t                                    | AS                                    | +++                        | t      | a    | t   |          |         |      |        |      |           |    |          |        |       |        |     |         |      |          |         |           |         |          |           |
| a                         | 4791163                 | g                    | 3318055                   | g                | 3232839               | s                 | UT189/AS                    | rec34               | a                                    | AS                                    | +++                        | a      | a    |     |          |         |      |        |      |           |    |          |        |       |        |     |         |      |          |         |           |         |          |           |
| g                         | 4791179                 | a                    | 3318071                   | a                | 3232855               | ns                | UT189/AS                    | rec34               | g                                    | AS                                    | +++                        | g      | g    |     |          |         |      |        |      |           |    |          |        |       |        |     |         |      |          |         |           |         |          |           |
| c                         | 4791421                 | t                    | 3318313                   | t                | 3233097               | ns                | UT189/AS                    | rec34               | c                                    | AS                                    | +++                        | c      | c    |     |          |         |      |        |      |           |    |          |        |       |        |     |         |      |          |         |           |         |          |           |
| a                         | 4791459                 | g                    | 3318351                   | g                | 3233135               | s                 | UT189/AS                    | rec34               | g                                    | UT189                                 | +                          | g      | a    |     |          |         |      |        |      |           |    |          |        |       |        |     |         |      |          |         |           |         |          |           |
| g                         | 4791663                 | c                    | 3318555                   | c                | 3233339               | s                 | UT189/AS                    | rec34               | c                                    | UT189                                 | +++                        | c      | c    |     |          |         |      |        |      |           |    |          |        |       |        |     |         |      |          |         |           |         |          |           |
| c                         | 4791756                 | t                    | 3318648                   | t                | 3233432               | ns                | UT189/AS                    | rec34               | t                                    | UT189                                 | +                          | t      | c    |     |          |         |      |        |      |           |    |          |        |       |        |     |         |      |          |         |           |         |          |           |
| c                         | 4791765                 | t                    | 3318657                   | t                | 3233441               | s                 | UT189/AS                    | rec34               | t                                    | UT189                                 | +                          | t      | c    |     |          |         |      |        |      |           |    |          |        |       |        |     |         |      |          |         |           |         |          |           |
| a                         | 4791780                 | g                    | 3318672                   | g                | 3233456               | s                 | UT189/AS                    | rec34               | g                                    | UT189                                 | +                          | g      | t    |     |          |         |      |        |      |           |    |          |        |       |        |     |         |      |          |         |           |         |          |           |
| a                         | 4791788                 | g                    | 3318680                   | g                | 3233464               | s                 | UT189/AS                    | rec34               | g                                    | UT189                                 | +                          | g      | a    |     |          |         |      |        |      |           |    |          |        |       |        |     |         |      |          |         |           |         |          |           |
| c                         | 4791821                 | t                    | 3318713                   | t                | 3233497               | nc                | UT189/AS                    | rec34               | t                                    | UT189                                 | +++                        | t      | t    |     |          |         |      |        |      |           |    |          |        |       |        |     |         |      |          |         |           |         |          |           |
| t                         | 4795844                 | c                    | 3322736                   | c                | 3237520               | s                 | UT189                       | rec35               | c                                    | UT189                                 | +++                        | c      | c    |     |          |         |      |        |      |           |    |          |        |       |        |     |         |      |          |         |           |         |          |           |
| a                         | 4795847                 | g                    | 3322739                   | g                | 3237523               | s                 | UT189                       | rec35               | g                                    | UT189                                 | +++                        | g      | g    |     |          |         |      |        |      |           |    |          |        |       |        |     |         |      |          |         |           |         |          |           |
| t                         | 4795952                 | c                    | 3322844                   | c                | 3237628               | s                 | UT189                       | rec35               | c                                    | UT189                                 | +++                        | c      | c    |     |          |         |      |        |      |           |    |          |        |       |        |     |         |      |          |         |           |         |          |           |
| t                         | 4795970                 | c                    | 3322862                   | c                | 3237646               | s                 | UT189                       | rec35               | t                                    | AS                                    | +++                        | t      | t    |     |          |         |      |        |      |           |    |          |        |       |        |     |         |      |          |         |           |         |          |           |
| a                         | 4795977                 | g                    | 3322869                   | g                | 3237653               | ns                | UT189                       | rec35               | g                                    | UT189                                 | +++                        | g      | g    |     |          |         |      |        |      |           |    |          |        |       |        |     |         |      |          |         |           |         |          |           |
| a                         | 4796117                 | g                    | 3323009                   | g                | 3237793               | s                 | UT189                       | rec35               | g                                    | UT189                                 | +++                        | g      | g    |     |          |         |      |        |      |           |    |          |        |       |        |     |         |      |          |         |           |         |          |           |
| g                         | 4796156                 | a                    | 3323048                   | a                | 3237832               | s                 | UT189                       | rec35               | a                                    | UT189                                 | +++                        | a      | a    |     |          |         |      |        |      |           |    |          |        |       |        |     |         |      |          |         |           |         |          |           |
| t                         | 4796177                 | a                    | 3323069                   | a                | 3237853               | s                 | UT189                       | rec35               | a                                    | UT189                                 | +                          | a      | t    |     |          |         |      |        |      |           |    |          |        |       |        |     |         |      |          |         |           |         |          |           |
| c                         | 4796184                 | g                    | 3323076                   | g                | 3237860               | ns                | UT189                       | rec35               | g                                    | UT189                                 | +++                        | g      | g    |     |          |         |      |        |      |           |    |          |        |       |        |     |         |      |          |         |           |         |          |           |
| a                         | 4796198                 | g                    | 3323090                   | g                | 3237874               | s                 | UT189                       | rec35               | g                                    | UT189                                 | +                          | g      | a    |     |          |         |      |        |      |           |    |          |        |       |        |     |         |      |          |         |           |         |          |           |
| a                         | 4796314                 | t                    | 3323206                   | t                | 3237990               | ns                | UT189                       | rec35               | a                                    | AS                                    | +++                        | a      | a    |     |          |         |      |        |      |           |    |          |        |       |        |     |         |      |          |         |           |         |          |           |
| g                         | 4796494                 | a                    | 3323386                   | a                | 3238170               | nc                | UT189                       | rec35               | a                                    | UT189                                 | +                          |        |      |     |          |         |      |        |      |           |    |          |        |       |        |     |         |      |          |         |           |         |          |           |
| c                         | 4796512                 | t                    | 3323404                   | t                | 3238188               | nc                | UT189                       | rec35               | t                                    | UT189                                 | +                          |        |      |     |          |         |      |        |      |           |    |          |        |       |        |     |         |      |          |         |           |         |          |           |
| c                         | 4900894                 | c                    | 4917123                   | a                | 4879115               | ns                | S88                         | rec36               | c                                    | S88                                   | ++                         |        |      | c   | c        | c       | c    |        |      |           | c  | c        | c      | c     | c      |     |         | a    | a        | a       |           |         |          |           |
| g                         | 4900898                 | g                    | 4917127                   | a                | 4879119               | ns                | S88                         | rec36               | g                                    | S88                                   | ++                         |        |      | g   | g        | g       | g    |        |      |           | g  | g        | g      | g     | g      |     |         | a    | a        | a       |           |         |          |           |
| t                         | 4900923                 | t                    | 4917152                   | a                | 4879144               | s                 | S88                         | rec36               | t                                    | S88                                   | ++                         |        |      | t   | t        | t       | t    |        |      |           | t  | t        | t      | t     | t      |     |         | a    | a        | a       |           |         |          |           |
| a                         | 4900928                 | a                    | 4917157                   | g                | 4879149               | ns                | S88                         | rec36               | a                                    | S88                                   | ++                         |        |      | a   | a        | a       | a    |        |      |           | a  | a        | a      | a     | a      |     |         | g    | g        | g       |           |         |          |           |
| t                         | 4900932                 | t                    | 4917161                   | c                | 4879153               | s                 | S88                         | rec36               | t                                    | S88                                   | ++                         |        |      | t   | t        | t       | t    |        |      |           | t  | t        | t      | t     | t      |     |         | c    | c        | c       |           |         |          |           |
| a                         | 4900944                 | a                    | 4917173                   | c                | 4879165               | s                 | S88                         | rec36               | a                                    | S88                                   | ++                         |        |      | a   | c        | c       | c    |        |      |           | c  | c        | c      | c     | c      |     |         | c    | c        | c       |           |         |          |           |
| c                         | 4900968                 | c                    | 4917197                   | t                | 4879189               | s                 | S88                         | rec36               | c                                    | S88                                   | ++                         |        |      | c   | c        | c       | c    |        |      |           | c  | c        | c      | c     | c      |     |         | t    | t        | t       |           |         |          |           |
| g                         | 4900972                 | g                    | 4917201                   | t                | 4879193               | ns                | S88                         | rec36               | g                                    | S88                                   | ++                         |        |      | g   | g        | g       | g    |        |      |           | g  | g        | g      | g     | g      |     |         | g    | t        | t       |           |         |          |           |
| t                         | 4901007                 | t                    | 4917236                   | c                | 4879228               | s                 | S88                         | rec36               | t                                    | S88                                   | ++                         |        |      | t   | c        | c       | t    |        |      |           | t  | c        | c      | c     | t      | t   |         |      | c        | c       | c         | c       |          |           |
| c                         | 4901015                 | c                    | 4917244                   | t                | 4879236               | ns                | S88                         | rec36               | c                                    | S88                                   | ++                         |        |      | c   | c        | c       | c    |        |      |           | c  | c        | c      | c     | c      |     |         | t    | t        | t       | t         |         |          |           |
| c                         | 4901019                 | c                    | 4917248                   | a                | 4879240               | s                 | S88                         | rec36               | c                                    | S88                                   | ++                         |        |      | c   | c        | c       | c    |        |      |           | c  | c        | c      | c     | c      |     |         | a    | a        | a       |           |         |          |           |
| t                         | 4901023                 | t                    | 4917252                   | c                | 4879244               | ns                | S88                         | rec36               | t                                    | S88                                   | ++                         |        |      | t   | t        | t       | t    |        |      |           | t  | t        | t      | t     | t      |     |         | c    | c        | c       | c         |         |          |           |
| t                         | 4901025                 | t                    | 4917254                   | c                | 4879246               | s                 | S88                         | rec36               | t                                    | S88                                   | +++                        |        |      | t   | t        | t       | t    |        |      |           | t  | t        | t      | t     | t      |     |         | t    | t        | t       | t         |         |          |           |
| c                         | 4901028                 | c                    | 4917257                   | g                | 4879249               | s                 | S88                         | rec36               | c                                    | S88                                   | +++                        |        |      |     |          |         |      |        |      |           |    |          |        |       |        |     |         |      |          |         |           |         |          |           |

Table S8. Allocation of recombinational SNPs to lineages by virtual outgroup analysis<sup>a</sup>

| ExPEC genome site details |                         |                      |                           |                  |                       |                   |                             |                     |                                      | Outgroup Strains Details <sup>1</sup> |                            |        |      |     |          |         |      |        |      |           |    |          |        |       |        |     |         |      |          |         |           |         |          |           |   |
|---------------------------|-------------------------|----------------------|---------------------------|------------------|-----------------------|-------------------|-----------------------------|---------------------|--------------------------------------|---------------------------------------|----------------------------|--------|------|-----|----------|---------|------|--------|------|-----------|----|----------|--------|-------|--------|-----|---------|------|----------|---------|-----------|---------|----------|-----------|---|
| UT189 <sup>b</sup>        | UTI89 site <sup>c</sup> | APEC 01 <sup>b</sup> | APEC 01 site <sup>c</sup> | S88 <sup>b</sup> | S88 site <sup>c</sup> | type <sup>d</sup> | Event Lineage <sup>ef</sup> | Recombinant segment | Inferred ancestral base <sup>g</sup> | Outgroup Analysis <sup>e</sup>        | Support level <sup>h</sup> | CFT073 | ED1a | 536 | E2348/69 | SMS 3-5 | IA39 | UMN026 | K-12 | ATCC 8739 | HS | D1 Sd197 | CB9615 | Sakai | EDL933 | IA1 | E24377A | SE11 | SS Sd046 | F2a 301 | F2a 2457T | F5 8401 | B4 Sd227 | B18 BS512 |   |
| t                         | 4901959                 | t                    | 4918188                   | c                | 4880047               | s                 | S88                         | rec36               | t                                    | S88                                   | ++                         | c      | t    | t   | c        | c       | c    | c      | c    | c         | c  | c        | c      | c     | c      | c   | c       | c    | c        | c       | c         | c       | c        | c         |   |
| g                         | 4901986                 | g                    | 4918215                   | a                | 4880074               | s                 | S88                         | rec36               | g                                    | S88                                   | ++                         | g      | g    | g   | g        | g       | g    | g      | a    | a         | g  | g        | g      | g     | g      | g   | g       | c    | c        | a       | a         | a       | a        | g         |   |
| c                         | 4901991                 | c                    | 4918220                   | t                | 4880079               | ns                | S88                         | rec36               | c                                    | S88                                   | ++                         | c      | c    | c   | c        | c       | c    | r      | t    | t         | c  | r        | t      | t     | r      | c   | r       | t    | t        | t       | r         | r       | c        | c         |   |
| a                         | 4902010                 | a                    | 4918239                   | g                | 4880098               | s                 | S88                         | rec36               | a                                    | S88                                   | ++                         | a      | a    | a   | a        | a       | g    | g      | g    | a         | a  | a        | g      | g     | g      | g   | a       | a    | g        | g       | g         | g       | a        | a         |   |
| t                         | 4902031                 | t                    | 4918260                   | a                | 4880119               | s                 | S88                         | rec36               | t                                    | S88                                   | ++                         | t      | t    | t   | t        | a       | a    | a      | a    | a         | a  | a        | a      | a     | a      | a   | a       | a    | a        | a       | a         | a       | a        | a         |   |
| a                         | 4902162                 | a                    | 4918391                   | g                | 4880250               | ns                | S88                         | rec36               | a                                    | S88                                   | ++                         | a      | a    | a   | a        | a       | a    | a      | g    | g         | a  | a        | a      | a     | a      | a   | a       | g    | g        | g       | g         | a       | a        | a         |   |
| t                         | 4902178                 | t                    | 4918407                   | c                | 4880266               | s                 | S88                         | rec36               | t                                    | S88                                   | ++                         | c      | t    | t   | c        | c       | c    | c      | c    | c         | c  | c        | c      | c     | c      | c   | c       | c    | c        | c       | c         | c       | c        | c         |   |
| g                         | 4902213                 | g                    | 4918442                   | a                | 4880301               | ns                | S88                         | rec36               | g                                    | S88                                   | ++                         | g      | g    | g   | g        | a       | g    | g      | g    | g         | g  | g        | g      | g     | g      | g   | g       | a    | a        | a       | a         | a       | a        | a         | g |
| t                         | 4902230                 | t                    | 4918459                   | c                | 4880318               | ns                | S88                         | rec36               | t                                    | S88                                   | ++                         | t      | t    | t   | t        | c       | c    | c      | c    | c         | c  | c        | c      | c     | c      | c   | c       | c    | c        | c       | c         | c       | c        | c         |   |
| t                         | 4902244                 | t                    | 4918473                   | c                | 4880332               | s                 | S88                         | rec36               | t                                    | S88                                   | ++                         | t      | t    | t   | t        | c       | c    | c      | c    | c         | c  | c        | c      | c     | c      | c   | c       | c    | c        | c       | c         | c       | c        | c         |   |
| c                         | 4902431                 | c                    | 4918660                   | t                | 4880519               | s                 | S88                         | rec36               | c                                    | S88                                   | ++                         | c      | c    | c   | c        | t       | c    | c      | c    | c         | c  | c        | c      | c     | c      | c   | a       | c    | t        | t       | t         | t       | t        | c         |   |
| g                         | 4902539                 | g                    | 4918768                   | a                | 4880627               | s                 | S88                         | rec36               | g                                    | S88                                   | ++                         | g      | g    | g   | a        | a       | a    | a      | a    | a         | a  | a        | a      | a     | a      | a   | a       | a    | a        | a       | a         | a       | a        | a         |   |
| c                         | 4902583                 | c                    | 4918812                   | t                | 4880671               | ns                | S88                         | rec36               | c                                    | S88                                   | ++                         | c      | c    | c   | c        | c       | t    | t      | t    | t         | t  | t        | t      | t     | t      | t   | t       | t    | t        | t       | t         | t       | t        | t         |   |
| t                         | 4902680                 | t                    | 4918909                   | a                | 4880768               | s                 | S88                         | rec36               | t                                    | S88                                   | ++                         | t      | t    | t   | t        | a       | a    | a      | a    | a         | a  | a        | a      | a     | a      | a   | a       | a    | a        | a       | a         | a       | a        | a         |   |
| g                         | 4902683                 | g                    | 4918912                   | a                | 4880771               | s                 | S88                         | rec36               | g                                    | S88                                   | ++                         | g      | g    | g   | g        | a       | a    | a      | a    | a         | a  | a        | a      | a     | a      | a   | a       | a    | a        | a       | a         | a       | a        | a         |   |
| c                         | 4902692                 | c                    | 4918921                   | t                | 4880780               | ns                | S88                         | rec36               | c                                    | S88                                   | ++                         | c      | c    | c   | c        | c       | t    | t      | t    | t         | t  | t        | t      | t     | t      | t   | t       | t    | t        | t       | t         | t       | t        | t         |   |
| g                         | 4902695                 | g                    | 4918924                   | c                | 4880783               | s                 | S88                         | rec36               | g                                    | S88                                   | ++                         | g      | g    | g   | g        | c       | c    | c      | c    | c         | c  | c        | c      | c     | c      | c   | c       | c    | c        | c       | c         | c       | c        | c         |   |
| t                         | 4902698                 | t                    | 4918927                   | c                | 4880786               | s                 | S88                         | rec36               | t                                    | S88                                   | ++                         | t      | t    | t   | t        | c       | c    | c      | c    | c         | c  | c        | c      | c     | c      | c   | c       | c    | c        | c       | c         | c       | c        | c         |   |
| c                         | 4902730                 | c                    | 4918959                   | a                | 4880818               | ns                | S88                         | rec36               | c                                    | S88                                   | ++                         | c      | c    | c   | c        | t       | a    | a      | a    | a         | a  | a        | a      | a     | a      | a   | a       | a    | a        | a       | a         | a       | a        | a         |   |
| g                         | 4902738                 | g                    | 4918967                   | t                | 4880826               | ns                | S88                         | rec36               | g                                    | S88                                   | ++                         | g      | g    | g   | g        | t       | g    | g      | g    | g         | g  | g        | g      | g     | g      | g   | g       | t    | t        | t       | t         | t       | t        | g         |   |
| a                         | 4902884                 | a                    | 4919113                   | t                | 4880972               | s                 | S88                         | rec36               | a                                    | S88                                   | ++                         | a      | a    | a   | a        | a       | a    | c      | c    | c         | c  | a        | a      | a     | a      | a   | a       | c    | a        | c       | c         | c       | c        | c         |   |
| a                         | 4902914                 | a                    | 4919143                   | t                | 4881002               | s                 | S88                         | rec36               | a                                    | S88                                   | ++                         | a      | a    | a   | a        | a       | t    | t      | t    | t         | t  | a        | a      | a     | a      | t   | t       | t    | t        | t       | t         | t       | t        | t         |   |
| t                         | 4902929                 | t                    | 4919158                   | c                | 4881017               | s                 | S88                         | rec36               | c                                    | 2                                     | -                          | c      | c    | t   | c        | c       | c    | c      | c    | c         | c  | c        | c      | c     | c      | c   | c       | c    | c        | c       | c         | c       | c        | c         |   |
| t                         | 4903000                 | t                    | 4919229                   | c                | 4881088               | ns                | S88                         | rec36               | c                                    | 2                                     | -                          | c      | c    | t   | t        | c       | c    | c      | c    | c         | c  | c        | c      | c     | c      | c   | c       | c    | c        | c       | c         | c       | c        | c         |   |
| t                         | 4903019                 | t                    | 4919248                   | c                | 4881107               | s                 | S88                         | rec36               | t                                    | S88                                   | ++                         | t      | t    | t   | t        | c       | c    | c      | c    | c         | c  | t        | t      | t     | c      | t   | c       | c    | c        | c       | c         | c       | c        | c         |   |
| g                         | 4903181                 | g                    | 4919410                   | a                | 4881269               | s                 | S88                         | rec36               | g                                    | S88                                   | ++                         | g      | g    | g   | g        | g       | a    | g      | g    | g         | g  | g        | g      | g     | g      | a   | g       | g    | g        | g       | g         | g       | g        | g         |   |
| c                         | 4903277                 | c                    | 4919506                   | t                | 4881365               | s                 | S88                         | rec36               | c                                    | S88                                   | ++                         | c      | c    | c   | c        | c       | c    | t      | t    | t         | t  | t        | t      | t     | t      | t   | t       | t    | t        | c       | c         | c       | c        | t         |   |
| c                         | 4903304                 | c                    | 4919533                   | t                | 4881392               | s                 | S88                         | rec36               | t                                    | 2                                     | -                          | t      | t    | c   | t        | t       | t    | t      | t    | t         | t  | t        | t      | t     | t      | t   | t       | a    | a        | a       | a         | a       | a        | t         |   |
| c                         | 4903367                 | c                    | 4919596                   | a                | 4881455               | s                 | S88                         | rec36               | a                                    | 2                                     | -                          | a      | a    | c   | a        | a       | a    | a      | a    | a         | a  | a        | a      | a     | a      | a   | a       | a    | a        | a       | a         | a       | a        | a         | a |
| t                         | 4903450                 | t                    | 4919679                   | c                | 4881538               | ns                | S88                         | rec36               | c                                    | 2                                     | -                          | c      | c    | t   | c        | c       | t    | c      | c    | c         | c  | c        | c      | c     | c      | c   | c       | c    | c        | c       | c         | c       | c        | c         | c |
| t                         | 4903466                 | t                    | 4919695                   | c                | 4881554               | ns                | S88                         | rec36               | t                                    | S88                                   | ++                         | t      | t    | t   | t        | t       | c    | c      | c    | c         | c  | t        | t      | t     | c      | t   | c       | c    | c        | c       | c         | c       | c        | c         | c |
| t                         | 4903474                 | t                    | 4919703                   | c                | 4881562               | ns                | S88                         | rec36               | c                                    | 2                                     | -                          | c      | c    | t   | t        | c       | c    | c      | c    | c         | c  | c        | c      | c     | c      | c   | c       | c    | c        | c       | c         | c       | c        | c         | c |
| a                         | 4903614                 | a                    | 4919843                   | g                | 4881702               | s                 | S88                         | rec36               | g                                    | 2                                     | -                          | g      | g    | g   | g        | g       | g    | g      | g    | g         | g  | g        | g      | g     | g      | g   | g       | g    | g        | g       | g         | g       | g        | g         | g |
| c                         | 4903722                 | c                    | 4919951                   | g                | 4881810               | s                 | S88                         | rec36               | c                                    | S88                                   | ++++                       | c      | c    | c   | c        | c       | c    | c      | c    | c         | c  | c        | c      | c     | c      | c   | c       | c    | c        | c       | c         | c       | c        | c         | c |
| g                         | 4904180                 | g                    | 4920409                   | a                | 4882268               | s                 | S88                         | rec36               | g                                    | S88                                   | ++                         | g      | g    | a   | g        | a       | a    | a      | a    | a         | a  | a        | a      | a     | a      | a   | a       | a    | a        | a       | a         | a       | a        | a         | a |
| t                         | 4904236                 | t                    | 4920465                   | a                | 4882324               | ns                | S88                         | rec36               | t                                    | S88                                   | ++                         | t      | t    | a   | a        | t       | a    | a      | a    | a         | a  | a        | a      | a     | a      | a   | a       | a    | a        | a       | a         | a       | a        | a         | a |
| g                         | 4904342                 | g                    | 4920571                   | c                | 4882431               | nc                | S88                         | rec36               | g                                    | S88                                   | ++                         | g      | g    | g   | g        | g       | g    | g      | c    | c         | c  | c        | c      | c     | c      | c   | c       | c    | g        | g       | g         | g       | g        | g         | c |
| a                         | 4904343                 | a                    | 4920572                   | g                | 4882432               | nc                | S88                         | rec36               | a                                    | S88                                   | ++                         | a      | a    | a   | a        | a       | g    | g      | g    | g         | g  | g        | g      | g     | g      | g   | g       | g    | g        | g       | g         | g       | g        | g         | g |
| t                         | 4904357                 | t                    | 4920586                   | a                | 4882446               | nc                | S88                         | rec36               | t                                    | S88                                   | ++                         | -      | -    | -   | -        | -       | -    | -      | -    | -         | -  | -        | -      | -     | -      | -   | -       | -    | -        | -       | -         | -       | -        | -         |   |
| a                         | 4904358                 | a                    | 4920587                   | t                | 4882447               | nc                | S88                         | rec36               | a                                    | S88                                   | ++++                       | a      | a    | a   | a        | a       | a    | a      | a    | a         | a  | a        | a      | a     | a      | a   | a       | a    | a        | a       | a         | a       | a        | a         | a |
| a                         | 4904360                 | a                    | 4920589                   | t                | 4882449               | nc                | S88                         | rec36               | a                                    | S88                                   | ++                         | a      | a    | a   | a        | a       | a    | a      | a    | a         | a  | a        | a      | a     | a      | a   | a       | a    | a        | a       | a         | a       | a        | a         | t |
| g                         | 4904373                 | g                    | 4920602                   | t                | 4882462               | nc                | S88                         | rec36               | g                                    | S88                                   | ++                         | g      | g    | g   | g        | g       | g    | g      | g    | g         | g  | t        | t      | t     | g      | g   | g       | g    | g        | g       | g         | g       | g        | g         | g |
| t                         | 4904388                 | t                    | 4920617                   | g                | 4882477               | nc                | S88                         | rec36               | t                                    | S88                                   | ++                         | t      | t    | a   | t        | t       | t    | a      | a    | a         | a  | a        | a      | a     | a      | a   | a       | a    | t        | t       | t         | t       | t        | a         |   |
| a                         | 4904420                 | a                    | 4920649                   | g                | 4882509               | nc                | S88                         | rec36               | a                                    | S88                                   | ++                         | a      | a    | a   | a        | a       | g    | g      | t    | t         | t  | g        | g      | g     | g      | g   | g       | t    | t        | t       | t         | t       | a        | t         | c |
| c                         | 4904449                 | c                    | 4920678                   | a                | 4882538               | nc                | S88                         | rec36               | c                                    | S88                                   | ++                         | c      | c    | c   | c        | a       | c    | c      | c    | c         | c  | c        | a      | a     | a      | a   | c       | c    | c        | c       | c         | c       | c        | c         | c |
| a                         | 4904512                 | a                    | 4920741                   | g                | 4882601               | nc                | S88                         | rec36               | a                                    | S88                                   | ++++                       | a      | a    | a   | a        | a       | a    | a      | a    | a         | a  | a        | a      | a     | a      | a   | a       | a    | a        | a       | a         | a       | a        | a         | a |
| a                         | 4904537                 | a                    | 4920766                   | g                | 4882626               | nc                | S88                         | rec36               | g                                    | 2                                     | -                          | g      | g    | g   | a        | g       | g    | g      | g    | g         | g  | g        | g      | g     | g      | g   | g       | g    | g        | g       | g         | g       | g        | g         | g |
| g                         | 4904621                 | g                    | 4920850                   | a                | 4882710               | nc                | S88                         | rec36               | g                                    | S88                                   | ++                         | g      | g    | g   | g        | a       | g    | g      | g    | g         | g  | g        | g      | g     | g      | g   | g       | g    | g        | g       | g         | g       | g        | g         | g |
| t                         | 4904632                 | t                    | 4920861                   | a                | 4882721               | nc                | S88                         | rec36               | t                                    | S88                                   | ++                         | t      | t    | t   | t        | a       | t    | t      | t    | t         | t  | t        | t      | t     | t      | t   | t       | t    | a        | a       | a         | a       | a        | t         |   |
| g                         | 4904645                 | g                    | 4920874                   | a                | 4882734               | nc                | S88                         | rec36               | a                                    | 2                                     | -                          | a      | a    | a   | a        | a       | a    | a      | a    | a         | a  | a        | a      | a     | a      | a   | a       | a    | a        | a       | a         | a       | a        | a         | a |
| g                         | 4904648                 | g                    | 4920877                   | t                | 4882737               | nc                | S88                         | rec36               | g                                    | S88                                   | ++                         | g      | g    | g   | g        | g       | g    | g      | t    | t         | t  | g        | g      | g     | t      | t   | t       | g    | g        | g       | g         | g       | g        | g         | t |
| c                         | 4904649                 | c                    | 4920878                   | t                | 4882738               | nc                | S88                         | rec36               | c                                    | S88                                   | ++                         | c      | c    | t   | c        | t       | t    | t      | t    | t         | t  | t        | t      | t     | t      | t   | t       | t    | t        | t       | t         | t       | t        | c         | t |
| g                         | 4904708                 | g                    | 4920937                   | c                | 4882797               | nc                | S88                         | rec36               | g                                    | S88                                   | ++                         | g      | g    | g   | g        | t       | c    | c      | c    | c         | c  | c        | c      | c     | c      | c   | c       | c    | c        | c       | c         | c       | c        | g         | c |
| a                         | 4904787                 | a                    | 4921016                   | c                | 4882876               | nc                | S88                         | rec36               | a                                    | S88                                   | ++                         | a      | a    | c   | a        | c</     |      |        |      |           |    |          |        |       |        |     |         |      |          |         |           |         |          |           |   |

Table S8. Allocation of recombinational SNPs to lineages by virtual outgroup analysis<sup>a</sup>

| ExPEC genome site details |                         |                      |                           |                  |                       |                   | Outgroup Strains Details <sup>1</sup> |                     |                                      |                                |                            |        |      |     |          |         |      |        |      |           |    |          |        |       |        |     |         |      |          |         |           |         |          |           |
|---------------------------|-------------------------|----------------------|---------------------------|------------------|-----------------------|-------------------|---------------------------------------|---------------------|--------------------------------------|--------------------------------|----------------------------|--------|------|-----|----------|---------|------|--------|------|-----------|----|----------|--------|-------|--------|-----|---------|------|----------|---------|-----------|---------|----------|-----------|
| UT189 <sup>b</sup>        | UTI89 site <sup>c</sup> | APEC 01 <sup>b</sup> | APEC 01 site <sup>c</sup> | S88 <sup>b</sup> | S88 site <sup>c</sup> | type <sup>d</sup> | Event Lineage <sup>ef</sup>           | Recombinant segment | Inferred ancestral base <sup>g</sup> | Outgroup Analysis <sup>e</sup> | Support level <sup>h</sup> | CFT073 | ED1a | 536 | E2348/69 | SMS 3-5 | IA39 | UMN026 | K-12 | ATCC 8739 | HS | D1 Sd197 | CB9615 | Sakai | EDL933 | IA1 | E24377A | SE11 | SS Sd046 | F2a 301 | F2a 2457T | F5 8401 | B4 Sd227 | B18 BS512 |
| c                         | 4905461                 | c                    | 4921690                   | a                | 4883537               | nc                | S88                                   | rec36               | c                                    | S88                            | ++                         | c      | c    | c   | c        | a       | a    | a      | a    | a         | a  | a        | a      | a     | a      | a   | a       | a    | a        | a       | a         | a       | a        |           |
| t                         | 4905470                 | t                    | 4921699                   | c                | 4883546               | nc                | S88                                   | rec36               | t                                    | S88                            | ++++                       | t      | t    | t   | t        | t       | t    | t      | t    | t         | t  | t        | t      | t     | t      | t   | t       | t    | t        | t       | t         | t       | t        |           |
| a                         | 4905472                 | a                    | 4921701                   | c                | 4883548               | nc                | S88                                   | rec36               | a                                    | S88                            | ++                         | a      | a    | a   | a        | a       | a    | c      | c    | c         | c  | c        | c      | c     | c      | c   | c       | c    | c        | c       | c         | c       | c        |           |
| g                         | 4905513                 | g                    | 4921742                   | a                | 4883589               | nc                | S88                                   | rec36               | g                                    | S88                            | ++                         | g      | g    | g   | g        | g       | g    | g      | g    | g         | g  | g        | g      | g     | g      | g   | g       | g    | g        | g       | g         | g       | g        |           |
| a                         | 4905529                 | a                    | 4921758                   | c                | 4883605               | nc                | S88                                   | rec36               | a                                    | S88                            | ++                         | a      | a    | a   | a        | a       | c    | c      | c    | c         | c  | c        | c      | c     | c      | c   | c       | c    | c        | c       | c         | c       | c        |           |
| g                         | 4905540                 | g                    | 4921769                   | t                | 4883616               | nc                | S88                                   | rec36               | g                                    | S88                            | ++                         | g      | g    | g   | g        | g       | t    | t      | t    | t         | t  | t        | t      | t     | t      | t   | t       | t    | t        | t       | t         | t       | t        |           |
| a                         | 4905546                 | a                    | 4921775                   | g                | 4883622               | nc                | S88                                   | rec36               | a                                    | S88                            | ++                         | a      | a    | a   | a        | a       | a    | g      | g    | g         | g  | g        | g      | g     | g      | g   | g       | g    | g        | g       | g         | g       | g        | g         |
| c                         | 4905548                 | c                    | 4921777                   | t                | 4883624               | nc                | S88                                   | rec36               | c                                    | S88                            | ++                         | c      | c    | c   | c        | c       | t    | t      | t    | t         | t  | t        | t      | t     | t      | t   | t       | t    | c        | c       | c         | c       | t        |           |
| a                         | 4905604                 | a                    | 4921833                   | c                | 4883680               | nc                | S88                                   | rec36               | c                                    | 2                              | -                          | c      | c    | c   | c        | c       | c    | c      | c    | c         | c  | c        | c      | c     | c      | c   | c       | c    | c        | c       | c         | c       | c        |           |
| t                         | 4905636                 | t                    | 4921865                   | a                | 4883712               | nc                | S88                                   | rec36               | t                                    | S88                            | ++                         | t      | t    | t   | t        | t       | a    | a      | a    | a         | a  | a        | a      | a     | a      | a   | a       | a    | a        | a       | a         | a       | a        |           |
| t                         | 4905771                 | t                    | 4922000                   | a                | 4883847               | s                 | S88                                   | rec36               | a                                    | 2                              | -                          | t      | a    | a   | a        | a       | a    | a      | a    | a         | a  | a        | a      | a     | a      | a   | a       | a    | a        | a       | a         | a       | a        |           |
| t                         | 4905792                 | t                    | 4922021                   | a                | 4883868               | s                 | S88                                   | rec36               | t                                    | S88                            | ++                         | t      | t    | t   | t        | t       | a    | a      | a    | a         | a  | a        | a      | a     | a      | a   | a       | a    | a        | a       | a         | a       | a        |           |
| a                         | 4905813                 | a                    | 4922042                   | t                | 4883889               | s                 | S88                                   | rec36               | a                                    | S88                            | ++                         | a      | a    | a   | a        | t       | t    | t      | t    | t         | t  | t        | t      | t     | t      | t   | t       | t    | t        | t       | t         | t       | t        |           |
| a                         | 4905816                 | a                    | 4922045                   | g                | 4883892               | s                 | S88                                   | rec36               | a                                    | S88                            | ++                         | a      | a    | a   | a        | g       | g    | g      | g    | g         | g  | g        | g      | g     | g      | g   | g       | g    | g        | g       | g         | g       | g        | g         |
| c                         | 4905855                 | c                    | 4922084                   | t                | 4883931               | s                 | S88                                   | rec36               | c                                    | S88                            | ++                         | c      | c    | c   | c        | c       | t    | t      | t    | t         | t  | t        | t      | t     | t      | t   | t       | t    | t        | t       | t         | t       | t        |           |
| a                         | 4905955                 | a                    | 4922184                   | g                | 4884031               | ns                | S88                                   | rec36               | a                                    | S88                            | ++                         | a      | a    | a   | a        | a       | g    | g      | g    | g         | g  | g        | g      | g     | g      | g   | g       | g    | g        | g       | g         | g       | g        | g         |
| t                         | 4905993                 | t                    | 4922222                   | g                | 4884069               | s                 | S88                                   | rec36               | t                                    | S88                            | ++                         | t      | t    | t   | t        | t       | g    | g      | g    | g         | g  | t        | t      | t     | g      | g   | t       | t    | t        | t       | t         | t       | t        | g         |
| t                         | 4905996                 | t                    | 4922225                   | c                | 4884072               | s                 | S88                                   | rec36               | t                                    | S88                            | ++                         | t      | t    | t   | t        | t       | c    | c      | c    | c         | c  | t        | t      | t     | c      | c   | t       | t    | t        | t       | t         | t       | t        | c         |
| a                         | 4906029                 | a                    | 4922258                   | g                | 4884105               | s                 | S88                                   | rec36               | a                                    | S88                            | ++                         | a      | a    | a   | a        | a       | g    | a      | a    | a         | t  | g        | g      | g     | a      | t   | a       | a    | a        | a       | a         | a       | a        | g         |
| a                         | 4906044                 | a                    | 4922273                   | g                | 4884120               | s                 | S88                                   | rec36               | a                                    | S88                            | ++                         | a      | a    | a   | a        | a       | g    | g      | g    | g         | g  | g        | g      | g     | g      | g   | g       | g    | g        | g       | g         | g       | g        | g         |
| a                         | 4906197                 | a                    | 4922426                   | g                | 4884273               | s                 | S88                                   | rec36               | a                                    | S88                            | ++                         | a      | a    | a   | a        | a       | g    | g      | g    | g         | g  | g        | g      | g     | g      | g   | g       | g    | g        | g       | g         | g       | g        | g         |
| a                         | 4906399                 | a                    | 4922628                   | g                | 4884475               | nc                | S88                                   | rec36               | a                                    | S88                            | ++                         | a      | a    | a   | a        | a       | g    | g      | g    | g         | g  | a        | a      | a     | g      | g   | g       | g    | g        | g       | g         | g       | g        | a         |
| a                         | 4906414                 | a                    | 4922643                   | c                | 4884490               | nc                | S88                                   | rec36               | c                                    | 2                              | -                          | c      | c    | c   | c        | c       | c    | c      | c    | c         | c  | c        | c      | c     | c      | c   | c       | c    | c        | c       | c         | c       | c        | c         |
| g                         | 4906518                 | g                    | 4922747                   | a                | 4884594               | nc                | S88                                   | rec36               | g                                    | S88                            | ++                         | g      | g    | g   | g        | t       | t    | t      | t    | t         | t  | t        | t      | t     | t      | t   | t       | t    | t        | t       | t         | t       | t        | t         |
| c                         | 4906519                 | c                    | 4922748                   | t                | 4884595               | nc                | S88                                   | rec36               | c                                    | S88                            | ++++                       | c      | c    | c   | c        | c       | c    | c      | c    | c         | c  | c        | c      | c     | c      | c   | c       | c    | c        | c       | c         | c       | c        | c         |
| c                         | 4906526                 | c                    | 4922755                   | t                | 4884602               | nc                | S88                                   | rec36               | t                                    | 2                              | -                          | c      | t    | t   | t        | c       | t    | c      | c    | c         | c  | c        | c      | c     | c      | c   | c       | c    | c        | c       | c         | c       | c        | t         |
| t                         | 4906529                 | t                    | 4922758                   | c                | 4884605               | nc                | S88                                   | rec36               | t                                    | S88                            | ++                         | t      | t    | t   | t        | c       | c    | c      | c    | c         | c  | c        | c      | c     | c      | c   | c       | c    | c        | c       | c         | c       | c        | c         |
| g                         | 4906616                 | g                    | 4922845                   | a                | 4884691               | nc                | S88                                   | rec36               | g                                    | S88                            | ++                         | g      | g    | g   | g        | g       | g    | g      | g    | g         | g  | a        | a      | a     | g      | a   | g       | g    | g        | g       | g         | g       | g        | g         |
| g                         | 4906683                 | g                    | 4922912                   | t                | 4884758               | nc                | S88                                   | rec36               | g                                    | S88                            | ++                         | g      | g    | g   | t        | t       | t    | t      | t    | t         | t  | t        | t      | t     | t      | t   | t       | t    | t        | t       | t         | t       | t        | t         |
| g                         | 4906836                 | g                    | 4923065                   | t                | 4884911               | s                 | S88                                   | rec36               | g                                    | S88                            | ++                         | g      | g    | g   | g        | t       | g    | t      | t    | t         | t  | t        | t      | t     | t      | t   | t       | t    | t        | t       | t         | t       | t        | t         |
| t                         | 4906935                 | t                    | 4923164                   | c                | 4885010               | s                 | S88                                   | rec36               | t                                    | S88                            | ++                         | t      | t    | t   | t        | c       | t    | c      | c    | c         | c  | t        | t      | t     | t      | t   | t       | t    | c        | c       | c         | c       | c        | t         |
| t                         | 4907100                 | t                    | 4923329                   | c                | 4885175               | s                 | S88                                   | rec36               | t                                    | S88                            | ++                         | c      | c    | t   | c        | c       | c    | c      | c    | c         | c  | c        | c      | c     | c      | c   | c       | c    | c        | c       | c         | c       | c        | c         |
| t                         | 4907205                 | t                    | 4923434                   | c                | 4885280               | s                 | S88                                   | rec36               | t                                    | S88                            | ++                         | t      | t    | t   | t        | c       | c    | c      | c    | c         | c  | c        | c      | c     | c      | c   | c       | c    | c        | c       | c         | c       | c        | c         |
| t                         | 4907220                 | t                    | 4923449                   | g                | 4885295               | s                 | S88                                   | rec36               | g                                    | 2                              | -                          | g      | g    | g   | g        | a       | g    | g      | g    | g         | g  | g        | g      | g     | g      | g   | g       | g    | g        | g       | g         | g       | g        | g         |
| c                         | 4907372                 | c                    | 4923601                   | t                | 4885447               | ns                | S88                                   | rec36               | c                                    | S88                            | ++                         | t      | c    | c   | g        | c       | t    | t      | t    | t         | t  | t        | t      | t     | t      | t   | t       | t    | t        | t       | t         | t       | t        | t         |
| g                         | 4907375                 | g                    | 4923604                   | a                | 4885450               | s                 | S88                                   | rec36               | g                                    | S88                            | ++++                       | g      | g    | g   | g        | g       | g    | g      | g    | g         | a  | g        | g      | g     | g      | g   | g       | g    | g        | g       | g         | g       | g        | g         |
| a                         | 4907384                 | a                    | 4923613                   | t                | 4885459               | nc                | S88                                   | rec36               | t                                    | 2                              | -                          | t      | t    | t   | t        | t       | t    | t      | t    | t         | t  | t        | t      | t     | t      | t   | t       | t    | t        | t       | t         | t       | t        | t         |
| a                         | 4907392                 | a                    | 4923621                   | g                | 4885467               | nc                | S88                                   | rec36               | a                                    | S88                            | ++++                       | a      | a    | a   | a        | a       | a    | a      | a    | a         | a  | a        | a      | a     | a      | a   | a       | a    | a        | a       | a         | a       | a        | a         |
| t                         | 4907398                 | t                    | 4923627                   | g                | 4885473               | nc                | S88                                   | rec36               | t                                    | S88                            | ++++                       | t      | t    | t   | t        | t       | t    | t      | t    | t         | t  | t        | t      | t     | t      | t   | t       | t    | t        | t       | t         | t       | t        | t         |
| t                         | 4907440                 | t                    | 4923669                   | c                | 4885515               | nc                | S88                                   | rec36               | t                                    | S88                            | ++                         | t      | t    | t   | t        | c       | t    | c      | c    | c         | a  | c        | c      | c     | c      | c   | c       | c    | c        | c       | c         | c       | c        | c         |
| a                         | 4907487                 | a                    | 4923716                   | t                | 4885562               | nc                | S88                                   | rec36               | a                                    | S88                            | ++++                       | a      | a    | a   | a        | a       | a    | a      | a    | a         | a  | a        | a      | a     | a      | a   | a       | a    | a        | a       | a         | a       | a        | a         |
| a                         | 4907520                 | a                    | 4923749                   | g                | 4885595               | nc                | S88                                   | rec36               | g                                    | 2                              | -                          | g      | g    | g   | g        | g       | g    | g      | g    | g         | g  | g        | g      | g     | g      | g   | g       | g    | g        | g       | g         | g       | g        | g         |
| t                         | 4907526                 | t                    | 4923755                   | c                | 4885601               | nc                | S88                                   | rec36               | t                                    | S88                            | ++++                       | t      | t    | t   | t        | t       | t    | t      | t    | t         | t  | t        | t      | t     | t      | t   | t       | t    | t        | t       | t         | t       | t        | t         |
| t                         | 4907564                 | t                    | 4923793                   | a                | 4885639               | nc                | S88                                   | rec36               | t                                    | S88                            | ++++                       | t      | t    | t   | t        | t       | t    | t      | t    | t         | t  | t        | t      | t     | t      | t   | t       | t    | t        | t       | t         | t       | t        | t         |
| a                         | 4907586                 | a                    | 4923815                   | g                | 4885661               | nc                | S88                                   | rec36               | a                                    | S88                            | ++                         | a      | a    | a   | a        | g       | a    | g      | a    | g         | g  | g        | g      | g     | g      | g   | g       | g    | g        | g       | g         | g       | g        | g         |
| g                         | 4907587                 | g                    | 4923816                   | t                | 4885662               | nc                | S88                                   | rec36               | g                                    | S88                            | ++++                       | g      | g    | g   | g        | g       | g    | g      | g    | g         | g  | g        | g      | g     | g      | g   | g       | g    | g        | g       | g         | g       | g        | g         |
| c                         | 4907593                 | c                    | 4923822                   | a                | 4885668               | nc                | S88                                   | rec36               | c                                    | S88                            | ++++                       | c      | c    | c   | c        | c       | t    | c      | c    | c         | c  | c        | c      | c     | c      | c   | c       | c    | c        | c       | c         | c       | c        | c         |
| c                         | 4907622                 | c                    | 4923851                   | a                | 4885697               | nc                | S88                                   | rec36               | c                                    | S88                            | ++++                       | c      | c    | c   | c        | c       | c    | c      | c    | c         | c  | c        | c      | c     | c      | c   | c       | c    | c        | c       | c         | c       | c        | c         |
| a                         | 4907643                 | a                    | 4923872                   | t                | 4885718               | nc                | S88                                   | rec36               | a                                    | S88                            | ++                         | a      | a    | a   | a        | a       | t    | a      | t    | t         | t  | t        | t      | t     | t      | t   | t       | t    | t        | t       | t         | t       | t        | t         |
| g                         | 4907646                 | g                    | 4923875                   | a                | 4885721               | nc                | S88                                   | rec36               | g                                    | S88                            | ++                         | g      | g    | g   | g        | a       | g    | a      | a    | a         | a  | a        | a      | a     | a      | a   | a       | a    | a        | a       | a         | a       | a        | a         |
| c                         | 4907647                 | c                    | 4923876                   | t                | 4885722               | nc                | S88                                   | rec36               | c                                    | S88                            | ++                         | c      | c    | c   | c        | c       | t    | c      | t    | t         | t  | t        | t      | t     | t      | t   | t       | t    | t        | t       | t         | t       | t        | t         |
| t                         | 4907661                 | t                    | 4923890                   | a                | 4885736               | nc                | S88                                   | rec36               | t                                    | S88                            | ++                         | t      | t    | t   | t        | t       | a    | t      | a    | a         | a  | a        | a      | a     | a      | a   | a       | a    | a        | a       | a         | a       | a        | a         |
| c                         | 4907668                 | c                    | 4923897                   | t                | 4885743               | nc                | S88                                   | rec36               | c                                    | S88                            | ++                         | c      | c    | c   | c        | c       | t    | c      | t    | t         | t  | t        | t      | t     | t      | t   | t       | t    | t        | t       | t         | t       | t        | t         |
| t                         | 4907671                 | t                    | 4923900                   | c                | 4885746               | nc                | S88                                   | rec36               | t                                    | S88                            | ++++                       | t      | t    | t   | t        | t       | t    | t      | t    | t         | t  | t        | t      | t     | t      | t   | t       | t    | t        | t       | t         | t       | t        | t         |
| a                         | 4907757                 | a                    | 4923986                   | g                | 4885832               | nc                | S88                                   | rec36</             |                                      |                                |                            |        |      |     |          |         |      |        |      |           |    |          |        |       |        |     |         |      |          |         |           |         |          |           |

Page 25

Table S8. Allocation of recombinational SNPs to lineages by virtual outgroup analysis<sup>a</sup>

Table S8. Allocation of recombinational SNPs to lineages by virtual outgroup analysis<sup>a</sup>

Table S8. Allocation of recombinational SNPs to lineages by virtual outgroup analysis<sup>a</sup>

| ExPEC genome site details |                         |                      |                           |                  |                       |                   |                              |                     |                                      | Outgroup Strains Details <sup>1</sup> |                            |        |      |     |          |         |      |        |      |           |    |          |        |       |        |     |         |      |          |         |           |         |          |           |
|---------------------------|-------------------------|----------------------|---------------------------|------------------|-----------------------|-------------------|------------------------------|---------------------|--------------------------------------|---------------------------------------|----------------------------|--------|------|-----|----------|---------|------|--------|------|-----------|----|----------|--------|-------|--------|-----|---------|------|----------|---------|-----------|---------|----------|-----------|
| UT189 <sup>b</sup>        | UT189 site <sup>c</sup> | APEC 01 <sup>b</sup> | APEC 01 site <sup>c</sup> | S88 <sup>b</sup> | S88 site <sup>c</sup> | type <sup>d</sup> | Event Lineage <sup>e,f</sup> | Recombinant segment | Inferred ancestral base <sup>g</sup> | Outgroup Analysis <sup>g</sup>        | Support level <sup>h</sup> | CFT073 | ED1a | 536 | E2348/69 | SMS 3-5 | IA39 | UMN026 | K-12 | ATCC 8739 | HS | D1 Sd197 | CB9615 | Sakai | EDL933 | IA1 | E24377A | SE11 | SS Sd046 | F2a 301 | F2a 2457T | F5 8401 | B4 Sd227 | B18 BS512 |
| c                         | 4919384                 | c                    | 4935613                   | a                | 4899816               | s                 | S88                          | rec36               | c                                    | S88                                   | ++                         | c      | c    | c   | g        |         |      |        |      | g         | g  |          |        |       |        |     |         | g    | g        | g       | g         | g       | g        |           |
| g                         | 4919385                 | g                    | 4935614                   | a                | 4899817               | ns                | S88                          | rec36               | g                                    | S88                                   | ++++                       | g      | g    | g   | g        |         |      |        |      | g         | g  |          |        |       |        |     |         | g    | g        | g       | g         | g       | g        |           |
| c                         | 4919390                 | c                    | 4935619                   | t                | 4899822               | s                 | S88                          | rec36               | c                                    | S88                                   | ++++                       | c      | c    | c   | c        |         |      |        |      | c         | c  |          |        |       |        |     |         | c    | c        | c       | c         | c       | c        |           |
| c                         | 4919391                 | c                    | 4935620                   | a                | 4899823               | ns                | S88                          | rec36               | c                                    | S88                                   | ++                         | c      | c    | c   | a        |         |      |        |      | c         | a  |          |        |       |        |     |         | a    | a        | a       | a         | a       | a        |           |
| g                         | 4919393                 | g                    | 4935622                   | c                | 4899825               | ns                | S88                          | rec36               | g                                    | S88                                   | ++                         | g      | g    | g   | c        |         |      |        |      | c         | c  |          |        |       |        |     |         | c    | c        | c       | c         | c       | c        |           |
| t                         | 4919400                 | t                    | 4935629                   | c                | 4899832               | ns                | S88                          | rec36               | t                                    | S88                                   | ++                         | t      | t    | t   | c        |         |      |        |      | c         | c  |          |        |       |        |     |         | c    | c        | c       | c         | c       | c        |           |
| c                         | 4919402                 | c                    | 4935631                   | c                | 4899834               | ns                | S88                          | rec36               | t                                    | S88                                   | ++                         | t      | t    | t   | c        |         |      |        |      | c         | a  |          |        |       |        |     |         | c    | c        | c       | c         | c       | c        |           |
| c                         | 4919403                 | c                    | 4935632                   | a                | 4899835               | ns                | S88                          | rec36               | c                                    | S88                                   | ++                         | c      | c    | c   | a        |         |      |        |      | a         | c  |          |        |       |        |     |         | a    | a        | a       | a         | a       | a        |           |
| a                         | 4919404                 | a                    | 4935633                   | c                | 4899836               | ns                | S88                          | rec36               | a                                    | S88                                   | ++                         | a      | a    | a   | c        |         |      |        |      | c         | c  |          |        |       |        |     |         | c    | c        | c       | c         | c       | c        |           |
| a                         | 4919405                 | a                    | 4935634                   | t                | 4899837               | ns                | S88                          | rec36               | a                                    | S88                                   | ++                         | a      | a    | a   | a        |         |      |        |      | t         | t  |          |        |       |        |     |         | t    | t        | t       | t         | t       | t        |           |
| g                         | 4919413                 | g                    | 4935642                   | a                | 4899845               | ns                | S88                          | rec36               | g                                    | S88                                   | ++                         | g      | g    | g   | a        |         |      |        |      | a         | a  |          |        |       |        |     |         | a    | a        | a       | a         | a       | a        |           |
| c                         | 4919420                 | c                    | 4935649                   | t                | 4899852               | s                 | S88                          | rec36               | c                                    | S88                                   | ++                         | c      | c    | c   | t        |         |      |        |      | t         | t  |          |        |       |        |     |         | t    | t        | t       | t         | t       | t        |           |
| a                         | 4919426                 | a                    | 4935655                   | g                | 4899858               | s                 | S88                          | rec36               | a                                    | S88                                   | ++                         | a      | a    | a   | g        |         |      |        |      | g         | g  |          |        |       |        |     |         | g    | g        | g       | g         | g       | g        |           |
| c                         | 4919427                 | c                    | 4935656                   | g                | 4899859               | ns                | S88                          | rec36               | c                                    | S88                                   | ++                         | c      | c    | c   | g        |         |      |        |      | g         | g  |          |        |       |        |     |         | g    | g        | g       | g         | g       | g        |           |
| g                         | 4919429                 | g                    | 4935658                   | a                | 4899861               | ns                | S88                          | rec36               | g                                    | S88                                   | ++                         | g      | g    | g   | a        |         |      |        |      | a         | a  |          |        |       |        |     |         | a    | a        | a       | a         | a       | a        |           |
| c                         | 4919430                 | c                    | 4935659                   | t                | 4899862               | s                 | S88                          | rec36               | c                                    | S88                                   | ++                         | c      | c    | c   | t        |         |      |        |      | t         | t  |          |        |       |        |     |         | t    | t        | t       | t         | t       | t        |           |
| a                         | 4919435                 | a                    | 4935664                   | g                | 4899867               | s                 | S88                          | rec36               | a                                    | S88                                   | ++                         | a      | a    | a   | g        |         |      |        |      | g         | g  |          |        |       |        |     |         | g    | g        | g       | g         | g       | g        |           |
| a                         | 4919436                 | a                    | 4935665                   | t                | 4899868               | ns                | S88                          | rec36               | a                                    | S88                                   | ++                         | a      | a    | a   | t        |         |      |        |      | t         | t  |          |        |       |        |     |         | t    | t        | t       | t         | t       | t        |           |
| t                         | 4919437                 | t                    | 4935666                   | c                | 4899869               | ns                | S88                          | rec36               | t                                    | S88                                   | ++                         | t      | t    | t   | c        |         |      |        |      | c         | c  |          |        |       |        |     |         | c    | c        | c       | c         | c       | c        |           |
| t                         | 4919459                 | t                    | 4935688                   | c                | 4899891               | s                 | S88                          | rec36               | t                                    | S88                                   | ++                         | t      | t    | t   | c        |         |      |        |      | c         | c  |          |        |       |        |     |         | c    | c        | c       | c         | c       | c        |           |
| g                         | 4919470                 | g                    | 4935699                   | t                | 4899902               | ns                | S88                          | rec36               | g                                    | S88                                   | ++                         | g      | g    | g   | t        |         |      |        |      | t         | t  |          |        |       |        |     |         | t    | t        | t       | t         | t       | t        |           |
| t                         | 4919477                 | t                    | 4935706                   | c                | 4899909               | s                 | S88                          | rec36               | t                                    | S88                                   | ++                         | t      | t    | t   | c        |         |      |        |      | c         | c  |          |        |       |        |     |         | c    | c        | c       | c         | c       | c        |           |
| g                         | 4919489                 | g                    | 4935718                   | a                | 4899921               | s                 | S88                          | rec36               | g                                    | S88                                   | ++                         | g      | g    | g   | a        |         |      |        |      | a         | a  |          |        |       |        |     |         | a    | a        | a       | a         | a       | a        |           |
| t                         | 4919491                 | t                    | 4935720                   | a                | 4899923               | ns                | S88                          | rec36               | t                                    | S88                                   | ++                         | t      | t    | t   | a        |         |      |        |      | a         | a  |          |        |       |        |     |         | a    | a        | a       | a         | a       | a        |           |
| t                         | 4919501                 | t                    | 4935730                   | c                | 4899933               | s                 | S88                          | rec36               | t                                    | S88                                   | ++                         | t      | t    | t   | c        |         |      |        |      | c         | c  |          |        |       |        |     |         | c    | c        | c       | c         | c       | c        |           |
| c                         | 4919513                 | c                    | 4935742                   | t                | 4899945               | s                 | S88                          | rec36               | c                                    | S88                                   | ++                         | c      | c    | c   | t        |         |      |        |      | t         | t  |          |        |       |        |     |         | t    | t        | t       | t         | t       | t        |           |
| t                         | 4919517                 | t                    | 4935746                   | c                | 4899949               | s                 | S88                          | rec36               | t                                    | S88                                   | ++                         | t      | t    | t   | c        |         |      |        |      | c         | c  |          |        |       |        |     |         | c    | c        | c       | c         | c       | c        |           |
| a                         | 4919519                 | a                    | 4935748                   | g                | 4899951               | s                 | S88                          | rec36               | a                                    | S88                                   | ++                         | a      | a    | a   | g        |         |      |        |      | g         | g  |          |        |       |        |     |         | g    | g        | g       | g         | g       | g        |           |
| c                         | 4919525                 | c                    | 4935754                   | t                | 4899957               | s                 | S88                          | rec36               | c                                    | S88                                   | ++                         | c      | c    | c   | t        |         |      |        |      | t         | t  |          |        |       |        |     |         | t    | t        | t       | t         | t       | t        |           |
| g                         | 4919528                 | g                    | 4935757                   | a                | 4899960               | s                 | S88                          | rec36               | g                                    | S88                                   | ++                         | g      | g    | g   | a        |         |      |        |      | a         | a  |          |        |       |        |     |         | a    | a        | a       | a         | a       | a        |           |
| t                         | 4919531                 | t                    | 4935760                   | g                | 4899963               | s                 | S88                          | rec36               | t                                    | S88                                   | ++                         | t      | t    | t   | g        |         |      |        |      | g         | g  |          |        |       |        |     |         | g    | g        | g       | g         | g       | g        |           |
| t                         | 4919549                 | t                    | 4935778                   | g                | 4899981               | s                 | S88                          | rec36               | t                                    | S88                                   | ++                         | t      | t    | t   | g        |         |      |        |      | g         | g  |          |        |       |        |     |         | g    | g        | g       | g         | g       | g        |           |
| a                         | 4919558                 | a                    | 4935787                   | g                | 4899990               | s                 | S88                          | rec36               | a                                    | S88                                   | ++                         | a      | a    | a   | g        |         |      |        |      | g         | g  |          |        |       |        |     |         | g    | g        | g       | g         | g       | g        |           |
| c                         | 4919582                 | c                    | 4935811                   | g                | 4900014               | s                 | S88                          | rec36               | c                                    | S88                                   | ++                         | c      | c    | c   | g        |         |      |        |      | g         | g  |          |        |       |        |     |         | g    | g        | g       | g         | g       | g        |           |
| t                         | 4919585                 | t                    | 4935814                   | c                | 4900017               | s                 | S88                          | rec36               | t                                    | S88                                   | ++                         | t      | t    | t   | c        |         |      |        |      | c         | c  |          |        |       |        |     |         | c    | c        | c       | c         | c       | c        |           |
| t                         | 4919586                 | t                    | 4935815                   | a                | 4900018               | ns                | S88                          | rec36               | t                                    | S88                                   | ++++                       | t      | t    | t   | t        |         |      |        |      | t         | a  |          |        |       |        |     |         | t    | t        | t       | t         | t       | t        |           |
| g                         | 4919592                 | g                    | 4935821                   | a                | 4900024               | ns                | S88                          | rec36               | g                                    | S88                                   | ++                         | g      | g    | g   | a        |         |      |        |      | a         | a  |          |        |       |        |     |         | a    | a        | a       | a         | a       | a        |           |
| a                         | 4919593                 | a                    | 4935822                   | c                | 4900025               | ns                | S88                          | rec36               | a                                    | S88                                   | ++                         | a      | a    | a   | c        |         |      |        |      | c         | c  |          |        |       |        |     |         | c    | c        | c       | c         | c       | c        |           |
| t                         | 4919595                 | t                    | 4935824                   | c                | 4900027               | s                 | S88                          | rec36               | t                                    | S88                                   | ++                         | t      | t    | t   | c        |         |      |        |      | c         | c  |          |        |       |        |     |         | c    | c        | c       | c         | c       | c        |           |
| c                         | 4919600                 | c                    | 4935829                   | g                | 4900032               | s                 | S88                          | rec36               | c                                    | S88                                   | ++                         | c      | c    | c   | g        |         |      |        |      | g         | g  |          |        |       |        |     |         | g    | g        | g       | g         | g       | g        |           |
| t                         | 4919603                 | t                    | 4935832                   | c                | 4900035               | s                 | S88                          | rec36               | t                                    | S88                                   | ++                         | t      | t    | t   | c        |         |      |        |      | c         | c  |          |        |       |        |     |         | c    | c        | c       | c         | c       | c        |           |
| t                         | 4919606                 | t                    | 4935835                   | c                | 4900038               | s                 | S88                          | rec36               | t                                    | S88                                   | ++                         | t      | t    | t   | c        |         |      |        |      | c         | c  |          |        |       |        |     |         | c    | c        | c       | c         | c       | c        |           |
| g                         | 4919609                 | g                    | 4935838                   | t                | 4900041               | s                 | S88                          | rec36               | g                                    | S88                                   | ++                         | g      | g    | g   | t        |         |      |        |      | t         | t  |          |        |       |        |     |         | t    | t        | t       | t         | t       | t        |           |
| g                         | 4919615                 | g                    | 4935844                   | a                | 4900047               | ns                | S88                          | rec36               | g                                    | S88                                   | ++                         | g      | g    | g   | a        |         |      |        |      | a         | a  |          |        |       |        |     |         | a    | a        | a       | a         | a       | a        |           |
| t                         | 4919630                 | t                    | 4935859                   | c                | 4900062               | s                 | S88                          | rec36               | t                                    | S88                                   | ++                         | t      | t    | t   | c        |         |      |        |      | c         | c  |          |        |       |        |     |         | c    | c        | c       | c         | c       | c        |           |
| g                         | 4919636                 | g                    | 4935865                   | a                | 4900068               | s                 | S88                          | rec36               | g                                    | S88                                   | ++                         | g      | g    | g   | a        |         |      |        |      | a         | a  |          |        |       |        |     |         | a    | a        | a       | a         | a       | a        |           |
| g                         | 4919651                 | c                    | 4935880                   | t                | 4900083               | s                 | S88                          | rec36               | c                                    | S88                                   | ++                         | c      | c    | c   | t        |         |      |        |      | t         | t  |          |        |       |        |     |         | t    | t        | t       | t         | t       | t        |           |
| c                         | 4940015                 | c                    | 4956244                   | t                | 4900139               | s                 | S88                          | rec36               | t                                    | 2                                     | -                          | t      | t    | t   | c        | c       | c    | c      | c    | t         | c  |          | c      | c     | c      | c   | c       | c    | c        | c       | c         | c       | c        |           |
| a                         | 4940069                 | a                    | 4956298                   | g                | 4900193               | s                 | S88                          | rec36               | g                                    | 2                                     | -                          | g      | g    | g   | a        | g       | g    | g      | g    | g         |    | g        | g      | g     | g      | g   | g       | g    | g        | g       | g         | g       | g        |           |
| c                         | 4940081                 | c                    | 4956310                   | t                | 4900205               | s                 | S88                          | rec36               | c                                    | S88                                   | ++                         | c      | c    | c   | c        | c       | c    | c      | t    | t         |    | c        | c      | c     | t      | c   | t       | c    | c        | c       | c         | c       | a        |           |
| g                         | 4940090                 | g                    | 4956319                   | a                | 4900214               | s                 | S88                          | rec36               | a                                    | 2                                     | -                          | a      | a    | a   | g        | a       | a    | a      | a    | a         |    | g        | g      | g     | a      | a   | a       | g    | g        | g       | g         | g       | g        |           |
| a                         | 4940126                 | a                    | 4956355                   | c                | 4900250               | s                 | S88                          | rec36               | c                                    | 2                                     | -                          | c      | c    | c   | a        | c       | c    | c      | c    | c         |    | c        | c      | c     | c      | c   | c       | c    | c        | c       | c         | c       | c        |           |
| c                         | 4940129                 | c                    | 4956358                   | t                | 4900253               | s                 | S88                          | rec36               | t                                    | 2                                     | -                          | t      | t    | t   | c        | t       | t    | t      | t    | t         |    | c        | c      | c     | t      | t   | t       | c    | c        | c       | c         | c       | c        |           |
| t                         | 4940219                 | t                    | 4956448                   | a                | 4900343               | s                 | S88                          | rec36               | a                                    | 2                                     | -                          | a      | a    | a   | a        | a       | a    | a      | a    | a         |    | a        | a      | a     | a      | a   | a       | a    | a        | a       | a         | a       | t        |           |
| g                         | 4940264                 | g                    | 4956493                   | a                | 4900388               | s                 | S88                          | rec36               | a                                    | 2                                     | -                          | a      | a    | a   | a        | a       | a    | a      | a    | a         |    | a        | a      | a     | a      | a   | a       | a    | a        | a       | a         | a       | g        |           |
| c                         | 4940357                 | c                    | 4956586                   | a                | 4900481               | s                 | S88                          | rec36               | a                                    | 2                                     | -                          | a      | a    | a   | a        | a       | a    | a      | a    | a         |    | a        | a      | a     | a      | a   | a       | a    | a        | a       | a         | a       | a        |           |
| t                         | 4940381                 | t                    | 4956610                   | g                | 4900505               | s                 | S88                          | rec36               | g                                    | 2                                     | -                          | g      | g    | g   | g        | g       | g    | g      | g    | g         |    | g        | g      | g     | g      | g   | g       | g    | g        | g       | g         | g       | g        |           |
| g                         | 4940390                 | g                    | 4956619                   | a                | 4900514               | s                 | S88                          | rec36               | g                                    | S88                                   | ++                         | g      | g    | g   | g        | a       | a    | a      | a    | a         |    | a        | a      | a     | a      | a   | a       | a    | a        | a       | a         | a       | g        |           |
| g                         | 4940510                 | g                    | 495673                    |                  |                       |                   |                              |                     |                                      |                                       |                            |        |      |     |          |         |      |        |      |           |    |          |        |       |        |     |         |      |          |         |           |         |          |           |

Table S8. Allocation of recombinational SNPs to lineages by virtual outgroup analysis<sup>a</sup>

| ExPEC genome site details |                         |                      |                           |                  |                       |                   |                              |                     |                                      | Outgroup Strains Details <sup>1</sup> |                            |        |      |     |          |         |      |        |      |           |    |          |        |       |        |     |         |      |          |         |           |         |          |           |   |   |   |
|---------------------------|-------------------------|----------------------|---------------------------|------------------|-----------------------|-------------------|------------------------------|---------------------|--------------------------------------|---------------------------------------|----------------------------|--------|------|-----|----------|---------|------|--------|------|-----------|----|----------|--------|-------|--------|-----|---------|------|----------|---------|-----------|---------|----------|-----------|---|---|---|
| UT189 <sup>b</sup>        | UTI89 site <sup>c</sup> | APEC 01 <sup>b</sup> | APEC 01 site <sup>c</sup> | S88 <sup>b</sup> | S88 site <sup>c</sup> | type <sup>d</sup> | Event Lineage <sup>e,f</sup> | Recombinant segment | Inferred ancestral base <sup>g</sup> | Outgroup Analysis <sup>g</sup>        | Support level <sup>h</sup> | CFT073 | ED1a | 536 | E2348/69 | SMS 3-5 | IA39 | UMN026 | K-12 | ATCC 8739 | HS | D1 Sd197 | CB9615 | Sakai | EDL933 | IA1 | E24377A | SE11 | SS Sd046 | F2a 301 | F2a 2457T | F5 8401 | B4 Sd227 | B18 BS512 |   |   |   |
| c                         | 4943743                 | c                    | 4959972                   | t                | 4903867               | nc                | S88                          | rec36               | c                                    | S88                                   | ++                         | c      | c    | c   | c        | c       | c    | c      | t    | t         | c  | c        | c      | c     | t      | t   | t       | c    | c        | c       | c         | c       | c        | c         |   |   |   |
| c                         | 4943764                 | c                    | 4959993                   | t                | 4903888               | nc                | S88                          | rec36               | c                                    | S88                                   | ++                         | c      | c    | c   | c        | c       | c    | c      | t    | t         | c  | c        | c      | c     | t      | t   | t       | c    | c        | c       | c         | c       | c        | c         |   |   |   |
| c                         | 4943787                 | c                    | 4960016                   | g                | 4903911               | nc                | S88                          | rec36               | c                                    | S88                                   | ++                         | c      | c    | c   | c        | c       | c    | c      | g    | g         | g  | g        | g      | g     | g      | g   | g       | g    | g        | g       | g         | g       | g        | g         |   |   |   |
| t                         | 4943791                 | t                    | 4960020                   | c                | 4903915               | nc                | S88                          | rec36               | t                                    | S88                                   | ++                         | t      | t    | t   | c        | c       | c    | c      | c    | c         | c  | c        | c      | c     | c      | c   | c       | c    | c        | c       | c         | c       | c        | c         |   |   |   |
| t                         | 4943794                 | t                    | 4960023                   | c                | 4903918               | nc                | S88                          | rec36               | t                                    | S88                                   | ++                         | t      | t    | t   | c        | c       | c    | c      | c    | c         | c  | c        | c      | c     | c      | c   | c       | c    | c        | c       | c         | c       | c        | c         |   |   |   |
| c                         | 4943800                 | c                    | 4960029                   | g                | 4903924               | nc                | S88                          | rec36               | c                                    | S88                                   | ++                         | c      | c    | c   | c        | c       | c    | c      | g    | g         | g  | g        | g      | g     | g      | g   | g       | g    | g        | g       | g         | g       | g        | g         | g |   |   |
| t                         | 4943814                 | t                    | 4960043                   | c                | 4903938               | nc                | S88                          | rec36               | c                                    | 2                                     | -                          | c      | c    | c   | c        | c       | c    | c      | c    | c         | c  | c        | c      | c     | c      | c   | c       | c    | c        | c       | c         | c       | c        | c         | c |   |   |
| c                         | 4943830                 | c                    | 4960059                   | t                | 4903954               | nc                | S88                          | rec36               | c                                    | S88                                   | ++                         | c      | c    | c   | c        | c       | c    | c      | t    | t         | c  | t        | t      | c     | t      | c   | t       | c    | c        | c       | c         | c       | c        | c         | c |   |   |
| g                         | 4943834                 | g                    | 4960063                   | t                | 4903958               | nc                | S88                          | rec36               | g                                    | S88                                   | ++                         | g      | g    | g   | t        | g       | t    | t      | t    | t         | t  | t        | t      | t     | t      | t   | t       | t    | t        | t       | t         | t       | t        | t         |   |   |   |
| g                         | 4943835                 | g                    | 4960064                   | c                | 4903959               | nc                | S88                          | rec36               | g                                    | S88                                   | ++                         | g      | c    | c   | c        | c       | c    | c      | c    | c         | c  | c        | c      | c     | c      | c   | c       | c    | c        | c       | c         | c       | c        | c         | c |   |   |
| c                         | 4943839                 | c                    | 4960068                   | t                | 4903963               | nc                | S88                          | rec36               | c                                    | S88                                   | ++                         | c      | c    | c   | c        | c       | c    | c      | c    | t         | t  | t        | t      | t     | t      | t   | t       | t    | t        | t       | t         | t       | t        | t         | t |   |   |
| a                         | 4943840                 | a                    | 4960069                   | g                | 4903964               | nc                | S88                          | rec36               | a                                    | S88                                   | ++                         | a      | a    | a   | g        | a       | g    | g      | g    | g         | g  | g        | g      | g     | g      | g   | g       | g    | g        | g       | g         | g       | g        | g         | g |   |   |
| t                         | 4943841                 | t                    | 4960070                   | c                | 4903965               | nc                | S88                          | rec36               | t                                    | S88                                   | ++                         | t      | t    | t   | c        | t       | c    | c      | c    | c         | c  | c        | c      | c     | c      | c   | c       | c    | c        | c       | c         | c       | c        | c         | c |   |   |
| a                         | 4943860                 | a                    | 4960089                   | g                | 4903984               | nc                | S88                          | rec36               | a                                    | S88                                   | ++                         | a      | a    | a   | g        | a       | g    | g      | g    | g         | g  | g        | g      | g     | g      | g   | g       | g    | g        | g       | g         | g       | g        | g         | g | g |   |
| t                         | 4943890                 | t                    | 4960119                   | c                | 4904014               | nc                | S88                          | rec36               | c                                    | 2                                     | -                          | c      | t    | c   | c        | t       | c    | c      | c    | c         | c  | c        | c      | c     | c      | c   | c       | c    | c        | c       | c         | c       | c        | c         | c |   |   |
| a                         | 4943910                 | a                    | 4960139                   | g                | 4904035               | nc                | S88                          | rec36               | g                                    | 2                                     | -                          | g      | a    | g   | g        | a       | g    | g      | g    | g         | g  | g        | g      | g     | g      | g   | g       | g    | g        | g       | g         | g       | g        | g         | g | g |   |
| g                         | 4943925                 | g                    | 4960154                   | t                | 4904050               | nc                | S88                          | rec36               | g                                    | S88                                   | ++                         | g      | g    | g   | t        | g       | t    | g      | g    | g         | g  | g        | g      | g     | g      | g   | g       | g    | g        | g       | g         | g       | g        | g         | g | g |   |
| c                         | 4943931                 | c                    | 4960160                   | t                | 4904056               | nc                | S88                          | rec36               | c                                    | S88                                   | ++                         | c      | c    | c   | t        | c       | t    | t      | t    | t         | t  | t        | t      | t     | t      | t   | t       | t    | t        | t       | t         | t       | t        | t         | t |   |   |
| t                         | 4943934                 | t                    | 4960163                   | c                | 4904059               | nc                | S88                          | rec36               | t                                    | S88                                   | ++                         | t      | t    | t   | c        | t       | c    | c      | c    | c         | c  | c        | c      | c     | c      | c   | c       | c    | c        | c       | c         | c       | c        | c         | c | c |   |
| g                         | 4943940                 | g                    | 4960169                   | a                | 4904065               | nc                | S88                          | rec36               | g                                    | S88                                   | ++                         | g      | g    | g   | a        | g       | a    | a      | a    | a         | a  | g        | g      | g     | g      | a   | a       | a    | a        | a       | a         | a       | a        | a         | a | a |   |
| a                         | 4943976                 | a                    | 4960205                   | g                | 4904101               | nc                | S88                          | rec36               | c                                    | S88                                   | +/-                        | c      | g    | c   | g        | a       | g    | g      | g    | g         | g  | g        | g      | g     | g      | g   | g       | g    | g        | g       | g         | g       | g        | g         | g | g |   |
| c                         | 4943986                 | c                    | 4960215                   | t                | 4904111               | nc                | S88                          | rec36               | c                                    | S88                                   | ++++                       | c      | c    | c   | c        | c       | c    | c      | c    | c         | c  | c        | c      | c     | c      | c   | c       | c    | c        | c       | c         | c       | c        | c         | c | c |   |
| a                         | 4943997                 | a                    | 4960226                   | g                | 4904122               | nc                | S88                          | rec36               | g                                    | 2                                     | -                          | g      | g    | g   | a        | g       | g    | g      | g    | g         | g  | g        | g      | g     | g      | g   | g       | g    | g        | g       | g         | g       | g        | g         | g | g |   |
| t                         | 4944003                 | t                    | 4960232                   | c                | 4904128               | nc                | S88                          | rec36               | c                                    | 2                                     | -                          | c      | c    | c   | t        | t       | t    | t      | c    | c         | c  | c        | c      | c     | c      | c   | c       | c    | c        | c       | c         | c       | c        | c         | c | c |   |
| t                         | 4944048                 | t                    | 4960477                   | c                | 4904173               | nc                | S88                          | rec36               | c                                    | 2                                     | -                          | c      | c    | t   | c        | t       | c    | c      | c    | c         | c  | c        | c      | c     | c      | c   | c       | c    | c        | c       | c         | c       | c        | c         | c | c |   |
| g                         | 4944090                 | g                    | 4960319                   | t                | 4904215               | nc                | S88                          | rec36               | g                                    | S88                                   | ++                         | g      | g    | g   | t        | g       | g    | g      | t    | g         | t  | t        | t      | t     | g      | t   | t       | t    | t        | t       | t         | t       | t        | t         | t | t |   |
| c                         | 4944193                 | c                    | 4960422                   | t                | 4909907               | s                 | S88                          | rec36               | c                                    | S88                                   | ++                         | c      | c    | c   | c        | c       | c    | c      | c    | c         | c  | c        | c      | c     | c      | c   | c       | c    | c        | c       | c         | c       | c        | c         | c | c |   |
| a                         | 4944205                 | a                    | 4960434                   | c                | 4909919               | s                 | S88                          | rec36               | a                                    | S88                                   | ++                         | a      | a    | a   | c        | a       | a    | a      | a    | a         | a  | a        | a      | a     | a      | a   | a       | a    | a        | a       | a         | a       | a        | a         | a | a |   |
| g                         | 4944211                 | g                    | 4960440                   | a                | 4909925               | s                 | S88                          | rec36               | g                                    | S88                                   | ++++                       | g      | g    | g   | a        | g       | g    | g      | g    | g         | g  | g        | g      | g     | g      | g   | g       | g    | g        | g       | g         | g       | g        | g         | g | g | g |
| a                         | 4944217                 | a                    | 4960446                   | g                | 4909931               | s                 | S88                          | rec36               | a                                    | S88                                   | ++                         | a      | a    | a   | g        | a       | g    | g      | a    | a         | a  | a        | a      | a     | a      | a   | a       | a    | a        | a       | a         | a       | a        | a         | a | a |   |
| c                         | 4944220                 | c                    | 4960449                   | g                | 4909934               | s                 | S88                          | rec36               | c                                    | S88                                   | ++++                       | c      | c    | c   | g        | c       | c    | c      | c    | c         | c  | c        | c      | c     | c      | c   | c       | c    | c        | c       | c         | c       | c        | c         | c | c |   |
| t                         | 4944226                 | t                    | 4960455                   | c                | 4909940               | s                 | S88                          | rec36               | t                                    | S88                                   | ++                         | t      | t    | t   | c        | t       | t    | t      | t    | t         | t  | c        | c      | c     | t      | t   | t       | t    | t        | t       | t         | t       | t        | t         | t | t |   |
| a                         | 4944232                 | a                    | 4960461                   | g                | 4909946               | s                 | S88                          | rec36               | a                                    | S88                                   | ++                         | a      | a    | a   | g        | a       | a    | a      | a    | a         | a  | g        | g      | g     | a      | a   | a       | a    | a        | a       | a         | a       | a        | a         | a | a |   |
| a                         | 4944238                 | a                    | 4960467                   | g                | 4909952               | s                 | S88                          | rec36               | a                                    | S88                                   | ++                         | a      | g    | a   | g        | a       | g    | g      | g    | g         | g  | g        | g      | g     | g      | g   | g       | g    | g        | g       | g         | g       | g        | g         | g | g |   |
| t                         | 4944250                 | t                    | 4960479                   | c                | 4909964               | s                 | S88                          | rec36               | c                                    | 2                                     | -                          | c      | c    | c   | c        | t       | c    | c      | c    | c         | c  | c        | c      | c     | c      | c   | c       | c    | c        | c       | c         | c       | c        | c         | c | c |   |
| g                         | 4944262                 | g                    | 4960491                   | a                | 4909976               | s                 | S88                          | rec36               | a                                    | 2                                     | -                          | a      | g    | a   | g        | a       | g    | g      | g    | g         | g  | a        | a      | a     | g      | g   | g       | g    | g        | g       | g         | g       | g        | g         | g | g | g |
| g                         | 4944265                 | g                    | 4960494                   | a                | 4909979               | s                 | S88                          | rec36               | a                                    | 2                                     | -                          | a      | g    | a   | a        | g       | g    | g      | g    | g         | g  | a        | a      | a     | g      | g   | g       | g    | g        | g       | g         | g       | g        | g         | g | g | g |
| a                         | 4944274                 | a                    | 4960503                   | g                | 4909988               | s                 | S88                          | rec36               | a                                    | S88                                   | ++                         | a      | a    | a   | g        | a       | a    | a      | a    | a         | a  | g        | g      | g     | a      | a   | a       | a    | a        | a       | a         | a       | a        | a         | a | a |   |
| g                         | 4944277                 | g                    | 4960506                   | a                | 4909991               | s                 | S88                          | rec36               | g                                    | S88                                   | ++                         | g      | g    | g   | a        | g       | g    | g      | g    | g         | g  | a        | a      | a     | g      | g   | g       | g    | g        | g       | g         | g       | g        | g         | g | g | g |
| g                         | 4944280                 | g                    | 4960509                   | a                | 4909994               | s                 | S88                          | rec36               | g                                    | S88                                   | ++                         | g      | g    | g   | a        | g       | g    | g      | g    | g         | g  | a        | a      | a     | g      | g   | g       | g    | g        | g       | g         | g       | g        | g         | g | g | g |
| t                         | 4944301                 | t                    | 4960530                   | c                | 4910015               | s                 | S88                          | rec36               | t                                    | S88                                   | ++                         | t      | t    | t   | c        | t       | t    | t      | t    | t         | t  | c        | c      | c     | t      | t   | t       | t    | t        | t       | t         | t       | t        | t         | t | t |   |
| a                         | 4944307                 | a                    | 4960536                   | g                | 4910021               | s                 | S88                          | rec36               | a                                    | S88                                   | ++                         | a      | a    | a   | g        | a       | a    | a      | a    | a         | a  | g        | g      | g     | a      | a   | a       | a    | a        | a       | a         | a       | a        | a         | a | a |   |
| g                         | 4944310                 | g                    | 4960539                   | a                | 4910024               | s                 | S88                          | rec36               | g                                    | S88                                   | ++                         | g      | g    | g   | a        | g       | g    | g      | g    | g         | g  | a        | a      | a     | g      | g   | g       | g    | g        | g       | g         | g       | g        | g         | g | g | g |
| t                         | 4944322                 | t                    | 4960551                   | c                | 4910036               | s                 | S88                          | rec36               | t                                    | S88                                   | ++                         | t      | t    | t   | c        | t       | t    | t      | a    | a         | a  | c        | c      | c     | a      | t   | a       | a    | a        | a       | a         | a       | a        | a         | a | a |   |
| c                         | 4944328                 | c                    | 4960557                   | a                | 4910042               | s                 | S88                          | rec36               | c                                    | S88                                   | ++                         | c      | c    | c   | a        | c       | c    | c      | c    | c         | c  | a        | a      | a     | c      | c   | c       | c    | c        | c       | c         | c       | c        | c         | c | c |   |
| t                         | 4944331                 | t                    | 4960560                   | c                | 4910045               | s                 | S88                          | rec36               | t                                    | S88                                   | ++                         | t      | t    | t   | c        | t       | t    | t      | t    | t         | t  | c        | c      | c     | t      | t   | t       | t    | t        | t       | t         | t       | t        | t         | t | t |   |
| a                         | 4944343                 | a                    | 4960572                   | g                | 4910057               | s                 | S88                          | rec36               | a                                    | S88                                   | ++                         | a      | a    | a   | g        | a       | a    | a      | a    | a         | a  | g        | g      | g     | a      | a   | a       | a    | a        | a       | a         | a       | a        | a         | a | a |   |
| a                         | 4944355                 | a                    | 4960584                   | c                | 4910069               | s                 | S88                          | rec36               | a                                    | S88                                   | ++                         | a      | a    | a   | c        | a       | a    | a      | a    | a         | a  | c        | c      | c     | a      | a   | a       | a    | a        | a       | a         | a       | a        | a         | a | a |   |
| t                         | 4944358                 | t                    | 4960587                   | g                | 4910072               | s                 | S88                          | rec36               | t                                    | S88                                   | ++                         | t      | t    | t   | g        | t       | t    | t      | t    | t         | t  | g        | g      | g     | t      | t   | t       | t    | t        | t       | t         | t       | t        | t         | t | t |   |
| g                         | 4944364                 | g                    | 4960593                   | c                | 4910078               | s                 | S88                          | rec36               | g                                    | S88                                   | ++                         | g      | g    | g   | t        | g       | g    | g      | g    | g         | g  | t        | t      | t     | g      | g   | g       | g    | g        | g       | g         | g       | g        | g         | g | g |   |
| a                         | 4944376                 | a                    | 4960605                   | t                | 4910090               | s                 | S88                          | rec36               | a                                    | S88                                   | ++                         | a      | a    | a   | g        | a       | a    | a      | a    | a         | a  | g        | g      | g     | a      | a   | a       | a    | a        | a       | a         | a       | a        | a         | a | a |   |
| g                         | 4944390                 | g                    | 4960619                   | t                | 4910104               | ns                | S88                          | rec36               |                                      |                                       |                            |        |      |     |          |         |      |        |      |           |    |          |        |       |        |     |         |      |          |         |           |         |          |           |   |   |   |

| ExPEC genome site details |                         |                      |                           |                  |                       |                   |                             |                     |                                      | Outgroup Strains Details <sup>1</sup> |                            |        |      |     |          |         |      |        |      |           |    |          |        |       |        |     |         |      |          |         |           |         |          |           |   |
|---------------------------|-------------------------|----------------------|---------------------------|------------------|-----------------------|-------------------|-----------------------------|---------------------|--------------------------------------|---------------------------------------|----------------------------|--------|------|-----|----------|---------|------|--------|------|-----------|----|----------|--------|-------|--------|-----|---------|------|----------|---------|-----------|---------|----------|-----------|---|
| UT189 <sup>b</sup>        | UT189 site <sup>c</sup> | APEC 01 <sup>b</sup> | APEC 01 site <sup>c</sup> | S88 <sup>b</sup> | S88 site <sup>c</sup> | type <sup>d</sup> | Event Lineage <sup>ef</sup> | Recombinant segment | Inferred ancestral base <sup>g</sup> | Outgroup Analysis <sup>e</sup>        | Support level <sup>h</sup> | CFT073 | ED1a | 536 | E2348/69 | SMS 3-5 | IA39 | UMN026 | K-12 | ATCC 8739 | HS | D1 Sd197 | CB9615 | Sakai | EDL933 | IA1 | E24377A | SE11 | SS Ss046 | F2a 301 | F2a 2457T | F5 8401 | B4 Sd227 | B18 BS512 |   |
| g                         | 4944556                 | g                    | 4960785                   | a                | 4910270               | s                 | S88                         | rec36               | g                                    | S88                                   | +++                        | g      | g    | g   | g        | g       | g    | g      | g    | g         | g  | g        | g      | g     | g      | g   | g       | g    | g        | g       | g         | g       | g        | g         |   |
| g                         | 4944562                 | g                    | 4960791                   | a                | 4910276               | s                 | S88                         | rec36               | g                                    | S88                                   | ++                         | g      | g    | g   | g        | g       | g    | g      | g    | g         | g  | g        | g      | g     | g      | g   | g       | g    | g        | g       | g         | g       | g        | g         |   |
| t                         | 4944565                 | g                    | 4960794                   | c                | 4910279               | s                 | S88                         | rec36               | g                                    | S88                                   | ++                         | g      | g    | g   | g        | g       | g    | g      | g    | g         | g  | g        | g      | g     | g      | g   | g       | g    | g        | g       | g         | g       | g        | g         |   |
| t                         | 4944568                 | t                    | 4960797                   | c                | 4910282               | s                 | S88                         | rec36               | t                                    | S88                                   | ++                         | t      | t    | t   | c        | r       | t    | t      | t    | t         | t  | t        | c      | c     | c      | r   | t       | t    | t        | t       | t         | t       | t        | t         |   |
| a                         | 4944570                 | a                    | 4960799                   | g                | 4910284               | s                 | S88                         | rec36               | a                                    | S88                                   | ++++                       | a      | a    | a   | g        | a       | a    | a      | a    | a         | a  | a        | a      | a     | a      | a   | a       | a    | a        | a       | a         | a       | a        | a         |   |
| a                         | 4944573                 | a                    | 4960802                   | c                | 4910287               | ns                | S88                         | rec36               | a                                    | S88                                   | ++                         | a      | a    | a   | c        | a       | a    | a      | a    | a         | a  | a        | c      | c     | c      | a   | a       | a    | a        | a       | a         | a       | a        | a         |   |
| t                         | 4944574                 | t                    | 4960803                   | a                | 4910288               | s                 | S88                         | rec36               | t                                    | S88                                   | ++                         | t      | t    | t   | a        | t       | t    | t      | t    | t         | t  | t        | a      | a     | a      | t   | t       | t    | t        | t       | t         | t       | t        | t         |   |
| t                         | 4944577                 | t                    | 4960806                   | c                | 4910291               | ns                | S88                         | rec36               | t                                    | S88                                   | ++                         | t      | t    | t   | c        | t       | t    | t      | t    | t         | t  | t        | c      | c     | c      | t   | t       | t    | t        | t       | t         | t       | t        | t         |   |
| g                         | 4944578                 | g                    | 4960807                   | t                | 4910292               | ns                | S88                         | rec36               | g                                    | S88                                   | ++                         | g      | g    | g   | t        | g       | g    | g      | g    | g         | g  | t        | t      | t     | g      | g   | g       | g    | g        | g       | g         | g       | g        | g         |   |
| a                         | 4944579                 | a                    | 4960808                   | g                | 4910293               | ns                | S88                         | rec36               | a                                    | S88                                   | ++                         | a      | a    | a   | g        | a       | a    | a      | a    | a         | a  | a        | g      | g     | g      | a   | a       | a    | a        | a       | a         | a       | a        | a         |   |
| t                         | 4944583                 | t                    | 4960812                   | c                | 4910297               | s                 | S88                         | rec36               | t                                    | S88                                   | ++                         | t      | t    | t   | c        | t       | t    | t      | t    | t         | t  | t        | c      | c     | c      | t   | t       | t    | t        | t       | t         | t       | t        | t         |   |
| a                         | 4944586                 | a                    | 4960815                   | g                | 4910300               | s                 | S88                         | rec36               | a                                    | S88                                   | ++                         | a      | a    | a   | g        | a       | a    | a      | a    | a         | a  | a        | g      | g     | g      | a   | a       | a    | a        | a       | a         | a       | a        | a         |   |
| a                         | 4944610                 | a                    | 4960839                   | c                | 4910324               | s                 | S88                         | rec36               | a                                    | S88                                   | ++                         | a      | a    | a   | g        | a       | a    | a      | a    | a         | a  | a        | g      | g     | g      | a   | a       | a    | a        | a       | a         | a       | a        | a         |   |
| c                         | 4944613                 | c                    | 4960842                   | g                | 4910327               | s                 | S88                         | rec36               | c                                    | S88                                   | ++                         | c      | c    | c   | g        | c       | c    | c      | c    | c         | c  | c        | g      | g     | g      | c   | c       | c    | c        | c       | c         | c       | c        | c         |   |
| t                         | 4944634                 | t                    | 4960863                   | a                | 4910348               | s                 | S88                         | rec36               | t                                    | S88                                   | ++                         | t      | t    | t   | a        | t       | t    | t      | t    | t         | t  | a        | a      | a     | t      | t   | t       | t    | t        | t       | t         | t       | t        | t         |   |
| g                         | 4944643                 | g                    | 4960872                   | a                | 4910357               | s                 | S88                         | rec36               | g                                    | S88                                   | ++                         | g      | g    | g   | a        | g       | a    | g      | g    | g         | g  | g        | a      | a     | a      | g   | g       | g    | g        | g       | g         | g       | g        | g         | g |
| g                         | 4944646                 | g                    | 4960875                   | a                | 4910360               | s                 | S88                         | rec36               | g                                    | S88                                   | ++                         | g      | g    | g   | a        | g       | a    | g      | g    | g         | g  | g        | a      | a     | a      | g   | g       | g    | g        | g       | g         | g       | g        | g         | g |
| g                         | 4944651                 | g                    | 4960880                   | a                | 4910365               | s                 | S88                         | rec36               | g                                    | S88                                   | ++++                       | g      | g    | g   | g        | g       | g    | g      | g    | g         | g  | g        | g      | g     | g      | g   | g       | g    | g        | g       | g         | g       | g        | g         | g |
| a                         | 4944655                 | a                    | 4960884                   | c                | 4910369               | s                 | S88                         | rec36               | a                                    | S88                                   | ++                         | a      | a    | a   | c        | a       | a    | a      | a    | a         | a  | a        | c      | c     | c      | a   | a       | a    | a        | a       | a         | a       | a        | a         | a |
| t                         | 4944676                 | t                    | 4960905                   | g                | 4910390               | ns                | S88                         | rec36               | t                                    | S88                                   | ++                         | t      | t    | t   | g        | t       | t    | t      | t    | t         | t  | t        | g      | g     | g      | t   | t       | t    | t        | t       | t         | t       | t        | t         |   |
| a                         | 4944677                 | a                    | 4960906                   | g                | 4910391               | ns                | S88                         | rec36               | a                                    | S88                                   | ++                         | a      | a    | a   | g        | a       | a    | a      | a    | a         | a  | a        | g      | g     | g      | a   | a       | a    | a        | a       | a         | a       | a        | a         | a |
| t                         | 4944678                 | t                    | 4960907                   | g                | 4910392               | ns                | S88                         | rec36               | t                                    | S88                                   | ++                         | t      | t    | t   | g        | t       | t    | t      | t    | t         | t  | t        | g      | g     | g      | t   | t       | t    | t        | t       | t         | t       | t        | t         | t |
| c                         | 4944679                 | c                    | 4960908                   | t                | 4910393               | s                 | S88                         | rec36               | c                                    | S88                                   | ++                         | c      | c    | c   | t        | c       | c    | c      | c    | c         | c  | c        | t      | t     | t      | c   | c       | c    | c        | c       | c         | c       | c        | c         | c |
| t                         | 4944686                 | t                    | 4960915                   | g                | 4910400               | ns                | S88                         | rec36               | t                                    | S88                                   | ++                         | t      | t    | t   | g        | t       | t    | t      | t    | t         | t  | t        | g      | g     | g      | t   | t       | t    | t        | t       | t         | t       | t        | t         | t |
| c                         | 4944688                 | c                    | 4960917                   | g                | 4910402               | ns                | S88                         | rec36               | c                                    | S88                                   | ++                         | c      | c    | c   | c        | c       | c    | c      | c    | c         | c  | c        | g      | g     | g      | c   | c       | c    | c        | c       | c         | c       | c        | c         | c |
| g                         | 4944689                 | g                    | 4960918                   | a                | 4910403               | ns                | S88                         | rec36               | g                                    | S88                                   | ++                         | g      | g    | g   | a        | g       | a    | g      | g    | g         | g  | g        | a      | a     | a      | g   | g       | g    | g        | g       | g         | g       | g        | g         | g |
| a                         | 4944704                 | a                    | 4960933                   | g                | 4910418               | ns                | S88                         | rec36               | a                                    | S88                                   | ++                         | a      | a    | a   | g        | a       | a    | a      | a    | a         | a  | a        | g      | g     | g      | a   | a       | a    | a        | a       | a         | a       | a        | a         | a |
| t                         | 4944705                 | t                    | 4960934                   | c                | 4910419               | ns                | S88                         | rec36               | t                                    | S88                                   | ++                         | t      | t    | t   | c        | t       | t    | t      | t    | t         | t  | t        | c      | c     | c      | t   | t       | t    | t        | t       | t         | t       | t        | t         | t |
| t                         | 4944709                 | t                    | 4960938                   | c                | 4910423               | ns                | S88                         | rec36               | t                                    | S88                                   | ++                         | t      | t    | t   | c        | t       | t    | t      | t    | t         | t  | t        | c      | c     | c      | t   | t       | t    | t        | t       | t         | t       | t        | t         | t |
| t                         | 4944711                 | t                    | 4960940                   | c                | 4910425               | ns                | S88                         | rec36               | c                                    | 2                                     | -                          | c      | t    | c   | g        | a       | t    | t      | t    | c         | c  | g        | g      | g     | c      | t   | c       | c    | c        | c       | c         | c       | c        | c         | c |
| g                         | 4944715                 | g                    | 4960944                   | a                | 4910429               | ns                | S88                         | rec36               | g                                    | S88                                   | ++                         | g      | g    | g   | a        | g       | g    | g      | g    | g         | g  | a        | a      | a     | g      | g   | g       | g    | g        | g       | g         | g       | g        | g         | g |
| g                         | 4944716                 | g                    | 4960945                   | a                | 4910430               | ns                | S88                         | rec36               | g                                    | S88                                   | ++                         | g      | g    | g   | a        | g       | a    | g      | g    | g         | g  | a        | a      | a     | g      | g   | g       | g    | g        | g       | g         | g       | g        | g         | g |
| c                         | 4944717                 | c                    | 4960946                   | t                | 4910431               | ns                | S88                         | rec36               | c                                    | S88                                   | ++++                       | c      | c    | c   | c        | c       | c    | c      | c    | c         | c  | c        | c      | c     | c      | c   | c       | c    | c        | c       | c         | c       | c        | c         | c |
| t                         | 4944724                 | t                    | 4960953                   | a                | 4910438               | ns                | S88                         | rec36               | t                                    | S88                                   | ++                         | t      | t    | t   | a        | t       | t    | t      | t    | t         | t  | a        | a      | a     | t      | t   | t       | t    | t        | t       | t         | t       | t        | t         | t |
| g                         | 4944730                 | g                    | 4960959                   | c                | 4910444               | s                 | S88                         | rec36               | g                                    | S88                                   | ++                         | g      | g    | g   | c        | g       | g    | g      | g    | g         | g  | c        | c      | c     | g      | g   | g       | g    | g        | g       | g         | g       | g        | g         | g |
| c                         | 4944733                 | c                    | 4960962                   | g                | 4910447               | ns                | S88                         | rec36               | c                                    | S88                                   | ++                         | c      | c    | c   | c        | g       | c    | c      | c    | c         | c  | c        | g      | g     | g      | c   | c       | c    | c        | c       | c         | c       | c        | c         | c |
| t                         | 4944736                 | t                    | 4960965                   | g                | 4910450               | s                 | S88                         | rec36               | t                                    | S88                                   | ++                         | t      | t    | t   | g        | t       | t    | t      | t    | t         | t  | t        | g      | g     | g      | t   | t       | t    | t        | t       | t         | t       | t        | t         | t |
| a                         | 4944738                 | a                    | 4960967                   | g                | 4910452               | s                 | S88                         | rec36               | a                                    | S88                                   | ++                         | a      | a    | a   | g        | a       | a    | a      | a    | a         | a  | a        | g      | g     | g      | a   | a       | a    | a        | a       | a         | a       | a        | a         | a |
| a                         | 4944739                 | a                    | 4960968                   | c                | 4910453               | s                 | S88                         | rec36               | a                                    | S88                                   | ++                         | a      | a    | a   | c        | a       | a    | a      | a    | a         | a  | a        | c      | c     | c      | a   | a       | a    | a        | a       | a         | a       | a        | a         | a |
| t                         | 4944744                 | t                    | 4960973                   | c                | 4910458               | ns                | S88                         | rec36               | t                                    | S88                                   | ++                         | t      | t    | t   | c        | t       | t    | t      | t    | t         | t  | c        | c      | c     | t      | t   | t       | t    | t        | t       | t         | t       | t        | t         | t |
| a                         | 4944745                 | a                    | 4960974                   | c                | 4910459               | s                 | S88                         | rec36               | a                                    | S88                                   | ++                         | a      | a    | a   | c        | a       | a    | a      | a    | a         | a  | a        | c      | c     | c      | a   | a       | a    | a        | a       | a         | a       | a        | a         | a |
| t                         | 4944748                 | t                    | 4960977                   | a                | 4910462               | s                 | S88                         | rec36               | t                                    | S88                                   | ++                         | t      | t    | t   | a        | t       | t    | t      | t    | t         | t  | t        | a      | a     | a      | t   | t       | t    | t        | t       | t         | t       | t        | t         | t |
| t                         | 4944753                 | t                    | 4960982                   | g                | 4910467               | ns                | S88                         | rec36               | t                                    | S88                                   | ++                         | t      | t    | t   | g        | t       | t    | t      | t    | t         | t  | t        | g      | g     | g      | t   | t       | t    | t        | t       | t         | t       | t        | t         | t |
| g                         | 4944756                 | g                    | 4960985                   | a                | 4910470               | s                 | S88                         | rec36               | g                                    | S88                                   | ++                         | g      | g    | g   | a        | g       | g    | g      | g    | g         | g  | a        | a      | a     | g      | g   | g       | g    | g        | g       | g         | g       | g        | g         | g |
| c                         | 4944757                 | c                    | 4960986                   | t                | 4910471               | ns                | S88                         | rec36               | c                                    | S88                                   | ++                         | c      | c    | t   | t        | c       | c    | c      | c    | c         | c  | c        | t      | t     | t      | c   | c       | c    | c        | c       | c         | c       | c        | c         | c |
| c                         | 4944760                 | c                    | 4960989                   | a                | 4910474               | ns                | S88                         | rec36               | c                                    | S88                                   | ++                         | c      | c    | c   | a        | c       | c    | c      | c    | c         | c  | c        | a      | a     | a      | c   | c       | c    | c        | c       | c         | c       | c        | c         | c |
| c                         | 4944764                 | c                    | 4960993                   | g                | 4910478               | ns                | S88                         | rec36               | c                                    | S88                                   | ++                         | c      | c    | c   | g        | c       | c    | c      | c    | c         | c  | c        | g      | g     | g      | c   | c       | c    | c        | c       | c         | c       | c        | c         | c |
| c                         | 4944772                 | c                    | 4961001                   | t                | 4910486               | s                 | S88                         | rec36               | c                                    | S88                                   | ++                         | c      | c    | c   | t        | c       | c    | c      | c    | c         | c  | c        | t      | t     | t      | c   | c       | c    | c        | c       | c         | c       | c        | c         | c |
| c                         | 4944775                 | c                    | 4961004                   | t                | 4910489               | s                 | S88                         | rec36               | c                                    | S88                                   | ++                         | c      | c    | c   | t        | c       | c    | c      | c    | c         | c  | c        | t      | t     | t      | c   | c       | c    | c        | c       | c         | c       | c        | c         | c |
| g                         | 4944781                 | g                    | 4961010                   | a                | 4910495               | s                 | S88                         | rec36               | g                                    | S88                                   | ++                         | g      | g    | g   | a        | g       | a    | g      | g    | g         | g  | a        | a      | a     | g      | g   | g       | g    | g        | g       | g         | g       | g        | g         | g |
| t                         | 4944790                 | t                    | 4961019                   | c                | 4910504               | s                 | S88                         | rec36               | t                                    | S88                                   | ++                         | t      | t    | t   | c        | t       | t    | t      | t    | t         | t  | c        | c      | c     | t      | t   | t       | t    | t        | t       | t         | t       | t        | t         | t |
| c                         | 4944799                 | c                    | 4961028                   | t                | 4910513               | s                 | S88                         | rec36               | c                                    | S88                                   | ++                         | c      | c    | c   | t        | c       | c    | c      | c    | c         | c  | c        | t      | t     | t      | c   | c       | c    | c        | c       | c         | c       | c        | c         | c |
| g                         | 4944802                 | g                    | 4961031                   | a                | 4910516               | s                 | S88                         | rec36               | g                                    | S88                                   | ++                         | g      | g    | g   | a        | g       | g    | g      | g    | g         | g  | a        | a      | a</   |        |     |         |      |          |         |           |         |          |           |   |

Table S8. Allocation of recombinational SNPs to lineages by virtual outgroup analysis<sup>a</sup>

| ExPEC genome site details |                         |                      |                           |                  |                       |                   |                             |                     |                                      | Outgroup Strains Details <sup>1</sup> |                            |        |      |     |          |         |      |        |      |           |    |          |        |       |        |     |         |      |          |         |           |         |          |           |
|---------------------------|-------------------------|----------------------|---------------------------|------------------|-----------------------|-------------------|-----------------------------|---------------------|--------------------------------------|---------------------------------------|----------------------------|--------|------|-----|----------|---------|------|--------|------|-----------|----|----------|--------|-------|--------|-----|---------|------|----------|---------|-----------|---------|----------|-----------|
| UT189 <sup>b</sup>        | UTI89 site <sup>c</sup> | APEC 01 <sup>b</sup> | APEC 01 site <sup>c</sup> | S88 <sup>b</sup> | S88 site <sup>c</sup> | type <sup>d</sup> | Event Lineage <sup>ef</sup> | Recombinant segment | Inferred ancestral base <sup>g</sup> | Outgroup Analysis <sup>g</sup>        | Support level <sup>h</sup> | CFT073 | ED1a | 536 | E2348/69 | SMS 3-5 | IA39 | UMN026 | K-12 | ATCC 8739 | HS | D1 Sd197 | CB9615 | Sakai | EDL933 | IA1 | E24377A | SE11 | SS Sd046 | F2a 301 | F2a 2457T | F5 8401 | B4 Sd227 | B18 BS512 |
| c                         | 4944979                 | c                    | 4961208                   | a                | 4910693               | s                 | S88                         | rec36               | c                                    | S88                                   | ++                         | c      | c    | c   | a        | c       | c    | c      | c    | c         | c  | a        | a      | a     | c      | c   | c       | c    | c        | c       | c         | c       | c        | c         |
| t                         | 4944987                 | t                    | 4961216                   | a                | 4910701               | ns                | S88                         | rec36               | t                                    | S88                                   | ++                         | t      | t    | t   | g        | t       | t    | t      | t    | t         | t  | g        | g      | g     | t      | t   | t       | t    | t        | t       | t         | t       | t        | t         |
| t                         | 4944991                 | t                    | 4961220                   | c                | 4910705               | s                 | S88                         | rec36               | t                                    | S88                                   | ++                         | t      | t    | t   | c        | t       | t    | t      | t    | t         | t  | c        | c      | c     | t      | t   | t       | t    | t        | t       | t         | t       | t        | t         |
| a                         | 4944995                 | a                    | 4961224                   | g                | 4910709               | ns                | S88                         | rec36               | g                                    | 2                                     | -                          | g      | a    | g   | g        | g       | g    | g      | g    | g         | g  | g        | g      | g     | g      | a   | g       | g    | g        | g       | g         | g       | g        | g         |
| c                         | 4944997                 | c                    | 4961226                   | t                | 4910711               | s                 | S88                         | rec36               | c                                    | S88                                   | ++++                       | c      | c    | c   | c        | c       | c    | c      | c    | c         | c  | c        | c      | c     | c      | c   | c       | c    | c        | c       | c         | c       | c        | c         |
| a                         | 4944999                 | a                    | 4961228                   | g                | 4910713               | s                 | S88                         | rec36               | a                                    | S88                                   | ++                         | a      | a    | a   | g        | a       | a    | a      | a    | a         | a  | g        | g      | g     | a      | a   | a       | a    | a        | a       | a         | a       | a        | a         |
| t                         | 4945003                 | t                    | 4961232                   | c                | 4910717               | s                 | S88                         | rec36               | t                                    | S88                                   | ++                         | t      | t    | t   | c        | t       | t    | t      | t    | t         | t  | c        | c      | c     | t      | t   | t       | t    | t        | t       | t         | t       | t        | t         |
| t                         | 4945009                 | t                    | 4961238                   | c                | 4910723               | s                 | S88                         | rec36               | t                                    | S88                                   | ++                         | t      | t    | t   | c        | t       | t    | t      | t    | t         | t  | c        | c      | c     | t      | t   | t       | t    | t        | t       | t         | t       | t        | t         |
| c                         | 4945018                 | c                    | 4961247                   | t                | 4910732               | s                 | S88                         | rec36               | c                                    | S88                                   | ++                         | c      | c    | c   | t        | c       | c    | c      | c    | c         | c  | t        | t      | t     | c      | c   | c       | c    | c        | c       | c         | c       | c        | c         |
| c                         | 4945021                 | c                    | 4961250                   | t                | 4910735               | s                 | S88                         | rec36               | c                                    | S88                                   | ++                         | c      | c    | c   | t        | c       | c    | c      | c    | c         | c  | t        | t      | t     | c      | c   | c       | c    | c        | c       | c         | c       | c        | c         |
| c                         | 4945024                 | c                    | 4961253                   | t                | 4910738               | s                 | S88                         | rec36               | c                                    | S88                                   | ++                         | c      | c    | c   | t        | c       | c    | c      | c    | c         | c  | t        | t      | t     | c      | c   | c       | c    | c        | c       | c         | c       | c        | c         |
| c                         | 4945028                 | c                    | 4961257                   | g                | 4910742               | ns                | S88                         | rec36               | c                                    | S88                                   | ++                         | c      | c    | c   | g        | c       | c    | c      | c    | c         | c  | g        | g      | g     | c      | c   | c       | c    | c        | c       | c         | c       | c        | c         |
| c                         | 4945030                 | c                    | 4961259                   | t                | 4910744               | s                 | S88                         | rec36               | c                                    | S88                                   | ++                         | c      | c    | c   | t        | c       | c    | c      | c    | c         | c  | t        | t      | t     | c      | c   | c       | c    | c        | c       | c         | c       | c        | c         |
| c                         | 4945033                 | c                    | 4961262                   | g                | 4910747               | s                 | S88                         | rec36               | c                                    | S88                                   | ++                         | c      | c    | c   | c        | g       | c    | c      | c    | c         | c  | g        | g      | g     | c      | c   | c       | c    | c        | c       | c         | c       | c        | c         |
| a                         | 4945039                 | a                    | 4961268                   | g                | 4910753               | s                 | S88                         | rec36               | a                                    | S88                                   | ++                         | a      | a    | a   | g        | a       | a    | a      | a    | a         | a  | g        | g      | g     | a      | a   | a       | a    | a        | a       | a         | a       | a        | a         |
| c                         | 4945045                 | c                    | 4961274                   | t                | 4910759               | s                 | S88                         | rec36               | c                                    | S88                                   | ++                         | c      | c    | c   | t        | c       | c    | c      | c    | c         | c  | t        | t      | t     | c      | c   | c       | c    | c        | c       | c         | c       | c        | c         |
| c                         | 4945051                 | a                    | 4961280                   | g                | 4910765               | s                 | S88                         | rec36               | a                                    | S88                                   | ++                         | a      | a    | a   | g        | a       | a    | a      | a    | a         | a  | g        | g      | g     | t      | a   | a       | a    | a        | a       | a         | a       | a        | a         |
| t                         | 4945054                 | t                    | 4961283                   | c                | 4910768               | s                 | S88                         | rec36               | t                                    | S88                                   | ++                         | t      | t    | t   | c        | t       | t    | t      | t    | t         | t  | c        | c      | c     | t      | t   | t       | t    | t        | t       | t         | t       | t        | t         |
| c                         | 4945066                 | c                    | 4961295                   | t                | 4910780               | s                 | S88                         | rec36               | c                                    | S88                                   | ++                         | c      | c    | c   | t        | c       | c    | c      | c    | c         | c  | t        | t      | t     | c      | c   | c       | c    | c        | c       | c         | c       | c        | c         |
| t                         | 4945069                 | t                    | 4961298                   | g                | 4910783               | s                 | S88                         | rec36               | t                                    | S88                                   | ++                         | t      | t    | a   | g        | t       | t    | t      | t    | t         | c  | g        | g      | g     | c      | t   | c       | c    | c        | c       | c         | c       | c        | c         |
| c                         | 4945072                 | c                    | 4961301                   | t                | 4910786               | ns                | S88                         | rec36               | c                                    | S88                                   | ++                         | c      | c    | c   | t        | t       | c    | c      | c    | c         | c  | t        | t      | t     | c      | c   | c       | c    | c        | c       | c         | c       | c        | c         |
| t                         | 4945073                 | t                    | 4961302                   | a                | 4910787               | ns                | S88                         | rec36               | t                                    | S88                                   | ++                         | t      | t    | t   | a        | t       | t    | t      | t    | t         | t  | a        | a      | a     | t      | t   | t       | t    | t        | t       | t         | t       | t        | t         |
| g                         | 4945074                 | g                    | 4961303                   | a                | 4910788               | ns                | S88                         | rec36               | g                                    | S88                                   | ++                         | g      | g    | g   | a        | g       | g    | g      | g    | g         | g  | a        | a      | a     | g      | g   | g       | g    | g        | g       | g         | g       | g        | g         |
| g                         | 4945075                 | g                    | 4961304                   | a                | 4910789               | s                 | S88                         | rec36               | g                                    | S88                                   | ++                         | g      | g    | g   | a        | g       | g    | g      | g    | g         | g  | a        | a      | a     | g      | g   | g       | g    | g        | g       | g         | g       | g        | g         |
| t                         | 4945081                 | t                    | 4961310                   | c                | 4910795               | s                 | S88                         | rec36               | t                                    | S88                                   | ++                         | t      | t    | t   | c        | t       | t    | t      | t    | t         | t  | c        | c      | c     | t      | t   | t       | t    | t        | t       | t         | t       | t        | t         |
| a                         | 4945087                 | a                    | 4961316                   | g                | 4910801               | s                 | S88                         | rec36               | a                                    | S88                                   | ++                         | a      | a    | a   | g        | a       | a    | a      | a    | a         | a  | g        | g      | g     | a      | a   | a       | a    | a        | a       | a         | a       | a        | a         |
| c                         | 4945090                 | c                    | 4961319                   | t                | 4910804               | s                 | S88                         | rec36               | c                                    | S88                                   | ++                         | a      | c    | c   | t        | a       | a    | a      | a    | a         | c  | t        | t      | t     | c      | c   | c       | c    | c        | c       | c         | c       | c        | c         |
| t                         | 4945096                 | t                    | 4961325                   | c                | 4910810               | s                 | S88                         | rec36               | t                                    | S88                                   | ++                         | t      | t    | t   | c        | t       | t    | t      | t    | t         | t  | c        | c      | c     | t      | t   | t       | t    | t        | t       | t         | t       | t        | t         |
| a                         | 4945102                 | a                    | 4961331                   | g                | 4910816               | s                 | S88                         | rec36               | a                                    | S88                                   | ++                         | a      | a    | a   | g        | a       | a    | a      | a    | a         | a  | g        | g      | g     | a      | a   | a       | a    | a        | a       | a         | a       | a        | a         |
| g                         | 4945105                 | g                    | 4961334                   | c                | 4910819               | s                 | S88                         | rec36               | g                                    | S88                                   | ++                         | g      | g    | g   | c        | g       | g    | g      | g    | g         | g  | c        | c      | c     | g      | g   | g       | g    | g        | g       | g         | g       | g        | g         |
| a                         | 4945108                 | a                    | 4961337                   | c                | 4910822               | s                 | S88                         | rec36               | a                                    | S88                                   | ++                         | a      | a    | a   | c        | a       | a    | a      | a    | a         | a  | c        | c      | c     | a      | a   | a       | a    | a        | a       | a         | a       | a        | a         |
| c                         | 4945120                 | c                    | 4961349                   | g                | 4910834               | s                 | S88                         | rec36               | c                                    | S88                                   | ++                         | c      | c    | c   | g        | c       | c    | c      | c    | c         | c  | g        | g      | g     | c      | c   | c       | c    | c        | c       | c         | c       | c        | c         |
| g                         | 4945129                 | g                    | 4961358                   | a                | 4910843               | s                 | S88                         | rec36               | g                                    | S88                                   | ++                         | g      | g    | g   | a        | g       | g    | g      | g    | g         | g  | a        | a      | a     | g      | g   | g       | g    | g        | g       | g         | g       | g        | g         |
| g                         | 4945132                 | g                    | 4961361                   | a                | 4910846               | ns                | S88                         | rec36               | g                                    | S88                                   | ++                         | g      | g    | g   | a        | g       | g    | g      | g    | g         | g  | a        | a      | a     | g      | g   | g       | g    | g        | g       | g         | g       | g        | g         |
| c                         | 4945133                 | c                    | 4961362                   | g                | 4910847               | ns                | S88                         | rec36               | c                                    | S88                                   | ++++                       | c      | c    | c   | c        | c       | c    | c      | c    | c         | c  | c        | c      | c     | c      | c   | c       | c    | c        | c       | c         | c       | c        | c         |
| a                         | 4945138                 | a                    | 4961367                   | g                | 4910852               | s                 | S88                         | rec36               | a                                    | S88                                   | ++                         | a      | a    | a   | g        | a       | a    | a      | a    | a         | a  | g        | g      | g     | a      | a   | a       | a    | a        | a       | a         | a       | a        | a         |
| c                         | 4945144                 | c                    | 4961373                   | t                | 4910858               | s                 | S88                         | rec36               | c                                    | S88                                   | ++                         | c      | c    | c   | t        | c       | c    | c      | c    | c         | c  | t        | t      | t     | c      | c   | c       | c    | c        | c       | c         | c       | c        | c         |
| c                         | 4945150                 | c                    | 4961379                   | t                | 4910864               | ns                | S88                         | rec36               | c                                    | S88                                   | ++                         | c      | c    | c   | t        | t       | c    | c      | c    | c         | c  | t        | t      | t     | c      | c   | c       | c    | c        | c       | c         | c       | c        | c         |
| g                         | 4945152                 | g                    | 4961381                   | c                | 4910866               | ns                | S88                         | rec36               | g                                    | S88                                   | ++                         | g      | g    | g   | c        | g       | g    | g      | g    | g         | g  | c        | c      | c     | g      | g   | g       | g    | g        | g       | g         | g       | g        | g         |
| t                         | 4945159                 | t                    | 4961388                   | g                | 4910873               | s                 | S88                         | rec36               | t                                    | S88                                   | ++++                       | t      | t    | t   | g        | t       | t    | t      | t    | t         | t  | t        | t      | t     | t      | t   | t       | t    | t        | t       | t         | t       | t        | t         |
| c                         | 4945165                 | c                    | 4961394                   | t                | 4910879               | ns                | S88                         | rec36               | c                                    | S88                                   | ++++                       | c      | c    | c   | t        | c       | c    | c      | c    | c         | c  | c        | c      | c     | c      | c   | c       | c    | c        | c       | c         | c       | c        | c         |
| g                         | 4945166                 | g                    | 4961395                   | t                | 4910880               | ns                | S88                         | rec36               | g                                    | S88                                   | ++                         | g      | g    | g   | t        | g       | g    | g      | g    | g         | g  | t        | t      | t     | g      | g   | g       | g    | g        | g       | g         | g       | g        | g         |
| a                         | 4945167                 | a                    | 4961396                   | c                | 4910881               | ns                | S88                         | rec36               | a                                    | S88                                   | ++                         | a      | a    | a   | c        | a       | a    | a      | a    | c         | c  | c        | c      | c     | a      | c   | a       | c    | c        | c       | c         | c       | c        | c         |
| t                         | 4945168                 | t                    | 4961397                   | g                | 4910882               | s                 | S88                         | rec36               | t                                    | S88                                   | ++                         | t      | t    | t   | g        | t       | t    | t      | c    | c         | g  | g        | g      | c     | t      | c   | c       | c    | c        | c       | c         | c       | c        | c         |
| t                         | 4945179                 | t                    | 4961408                   | g                | 4910893               | ns                | S88                         | rec36               | t                                    | S88                                   | ++                         | t      | t    | t   | g        | t       | t    | t      | t    | t         | t  | g        | g      | g     | t      | t   | t       | t    | t        | t       | t         | t       | t        | t         |
| g                         | 4945186                 | g                    | 4961415                   | t                | 4910900               | s                 | S88                         | rec36               | g                                    | S88                                   | ++                         | g      | g    | g   | t        | g       | g    | g      | g    | g         | g  | t        | t      | t     | g      | g   | g       | g    | g        | g       | g         | g       | g        | g         |
| a                         | 4945191                 | a                    | 4961420                   | g                | 4910905               | s                 | S88                         | rec36               | a                                    | S88                                   | ++                         | a      | a    | a   | g        | a       | a    | a      | a    | a         | a  | g        | g      | g     | a      | a   | a       | a    | a        | a       | a         | a       | a        | a         |
| a                         | 4945195                 | a                    | 4961424                   | c                | 4910909               | s                 | S88                         | rec36               | a                                    | S88                                   | ++                         | a      | a    | a   | c        | a       | a    | a      | a    | a         | a  | c        | c      | c     | a      | a   | a       | a    | a        | a       | a         | a       | a        | a         |
| a                         | 4945204                 | a                    | 4961433                   | g                | 4910918               | s                 | S88                         | rec36               | a                                    | S88                                   | ++                         | a      | a    | a   | g        | a       | a    | a      | a    | a         | a  | g        | g      | g     | a      | a   | a       | a    | a        | a       | a         | a       | a        | a         |
| g                         | 4945207                 | g                    | 4961436                   | a                | 4910921               | s                 | S88                         | rec36               | g                                    | S88                                   | ++                         | g      | g    | g   | a        | g       | g    | g      | g    | g         | g  | a        | a      | a     | g      | g   | g       | g    | g        | g       | g         | g       | g        | g         |
| a                         | 4945252                 | a                    | 4961481                   | t                | 4910966               | s                 | S88                         | rec36               | a                                    | S88                                   | ++                         | a      | a    | a   | t        | a       | a    | a      | a    | a         | a  | t        | t      | t     | a      | a   | a       | a    | a        | a       | a         | a       | a        | a         |
| g                         | 4945254                 | g                    | 4961483                   | a                | 4910968               | s                 | S88                         | rec36               | g                                    | S88                                   | ++                         | g      | g    | g   | a        | g       | g    | g      | g    | g         | g  | a        | a      | a     | g      | g   | g       | g    | g        | g       | g         | g       | g        | g         |
| g                         | 4945273                 | g                    | 4961502                   | a                | 4910987               | s                 | S88                         | rec36               | g                                    | S88                                   | ++                         | g      | g    | g   | a        | g       | g    | g      | g    | g         | g  | a        | a      | a     | g      | g   | g       | g    | g        | g       | g         | g       | g        | g         |
| g                         | 4945291                 | g                    | 4961520                   | t                | 4911005               | ns                | S88                         | rec36               | g                                    | S88                                   | ++                         | g      | g    | g   | t        | g       | g    |        |      |           |    |          |        |       |        |     |         |      |          |         |           |         |          |           |

Table S8. Allocation of recombinational SNPs to lineages by virtual outgroup analysis<sup>a</sup>

| ExPEC genome site details |                         |                      |                           |                  |                       |                   |                              |                     |                                      | Outgroup Strains Details <sup>1</sup> |                            |        |      |     |          |         |      |        |      |           |    |          |        |       |        |     |         |      |          |         |           |         |          |           |
|---------------------------|-------------------------|----------------------|---------------------------|------------------|-----------------------|-------------------|------------------------------|---------------------|--------------------------------------|---------------------------------------|----------------------------|--------|------|-----|----------|---------|------|--------|------|-----------|----|----------|--------|-------|--------|-----|---------|------|----------|---------|-----------|---------|----------|-----------|
| UT189 <sup>b</sup>        | UT189 site <sup>c</sup> | APEC 01 <sup>b</sup> | APEC 01 site <sup>c</sup> | S88 <sup>b</sup> | S88 site <sup>c</sup> | type <sup>d</sup> | Event Lineage <sup>e,f</sup> | Recombinant segment | Inferred ancestral base <sup>g</sup> | Outgroup Analysis <sup>g</sup>        | Support level <sup>h</sup> | CFT073 | ED1a | 536 | E2348/69 | SMS 3-5 | IA39 | UMN026 | K-12 | ATCC 8739 | HS | D1 Sd197 | CB9615 | Sakai | EDL933 | IA1 | E24377A | SE11 | SS Ss046 | F2a 301 | F2a 2457T | F5 8401 | B4 Sd227 | B18 BS512 |
| t                         | 4945640                 | t                    | 4961869                   | c                | 4911354               | s                 | S88                          | rec36               | t                                    | S88                                   | ++                         | t      | t    | t   | c        | t       | t    | t      | t    | t         | t  | c        | c      | c     | t      | t   | t       |      |          |         |           |         | t        | t         |
| g                         | 4945642                 | g                    | 4961871                   | a                | 4911356               | s                 | S88                          | rec36               | g                                    | S88                                   | ++                         | g      | g    | g   | a        | g       | g    | g      | g    | g         | g  | a        | a      | a     | g      | g   | g       |      |          |         |           |         | g        | g         |
| t                         | 4945643                 | t                    | 4961872                   | c                | 4911357               | s                 | S88                          | rec36               | t                                    | S88                                   | ++                         | t      | t    | t   | c        | t       | t    | t      | t    | t         | t  | c        | c      | c     | t      | t   | t       |      |          |         |           |         | t        | t         |
| c                         | 4945646                 | c                    | 4961875                   | t                | 4911360               | s                 | S88                          | rec36               | c                                    | S88                                   | ++                         | c      | c    | c   | c        | c       | c    | c      | c    | c         | c  | c        | c      | c     | c      | c   | c       |      |          |         |           |         | c        | c         |
| g                         | 4945649                 | g                    | 4961878                   | a                | 4911363               | s                 | S88                          | rec36               | g                                    | S88                                   | ++                         | g      | g    | g   | a        | g       | g    | g      | g    | g         | g  | a        | a      | a     | g      | g   | g       |      |          |         |           |         | g        | g         |
| t                         | 4945667                 | t                    | 4961896                   | c                | 4911381               | s                 | S88                          | rec36               | t                                    | S88                                   | ++                         | t      | t    | t   | c        | t       | t    | t      | t    | t         | t  | c        | c      | c     | t      | t   | t       |      |          |         |           |         | t        | t         |
| t                         | 4945672                 | t                    | 4961901                   | c                | 4911386               | ns                | S88                          | rec36               | t                                    | S88                                   | ++                         | t      | t    | t   | c        | t       | t    | t      | t    | t         | t  | c        | c      | c     | t      | t   | t       |      |          |         |           |         | t        | t         |
| t                         | 4945678                 | t                    | 4961907                   | c                | 4911392               | ns                | S88                          | rec36               | t                                    | S88                                   | ++                         | t      | t    | t   | g        | t       | t    | t      | t    | t         | t  | g        | g      | g     | t      | t   | t       |      |          |         |           |         | t        | t         |
| t                         | 4945679                 | t                    | 4961908                   | c                | 4911393               | s                 | S88                          | rec36               | t                                    | S88                                   | ++                         | t      | t    | t   | c        | t       | t    | t      | t    | t         | t  | c        | c      | c     | t      | t   | t       |      |          |         |           |         | t        | t         |
| c                         | 4945682                 | c                    | 4961911                   | t                | 4911396               | s                 | S88                          | rec36               | c                                    | S88                                   | ++                         | c      | c    | t   | t        | c       | c    | c      | c    | c         | c  | t        | t      | t     | c      | c   | c       |      |          |         |           |         | c        | c         |
| t                         | 4945689                 | t                    | 4961918                   | g                | 4911403               | ns                | S88                          | rec36               | t                                    | S88                                   | ++                         | t      | t    | t   | g        | t       | t    | t      | t    | t         | t  | g        | g      | g     | t      | t   | t       |      |          |         |           |         | t        | t         |
| a                         | 4945691                 | a                    | 4961920                   | t                | 4911405               | s                 | S88                          | rec36               | a                                    | S88                                   | ++                         | a      | a    | a   | t        | a       | a    | a      | a    | a         | a  | t        | t      | t     | a      | a   | a       |      |          |         |           |         | a        | a         |
| t                         | 4945703                 | t                    | 4961932                   | c                | 4911417               | s                 | S88                          | rec36               | c                                    | 2                                     | -                          | c      | c    | c   | c        | c       | c    | c      | c    | c         | c  | c        | c      | c     | c      | c   | c       |      |          |         |           |         | c        | c         |
| a                         | 4945706                 | a                    | 4961935                   | t                | 4911420               | s                 | S88                          | rec36               | a                                    | S88                                   | ++                         | a      | a    | a   | t        | a       | a    | a      | a    | a         | a  | t        | t      | t     | a      | a   | a       |      |          |         |           |         | a        | a         |
| g                         | 4945712                 | g                    | 4961941                   | a                | 4911426               | s                 | S88                          | rec36               | g                                    | S88                                   | ++                         | g      | g    | g   | a        | g       | a    | a      | a    | a         | a  | a        | a      | a     | a      | g   | a       |      |          |         |           |         | a        | a         |
| a                         | 4945736                 | a                    | 4961965                   | g                | 4911450               | s                 | S88                          | rec36               | a                                    | S88                                   | ++                         | a      | a    | a   | g        | a       | a    | a      | a    | a         | a  | g        | g      | g     | a      | a   | a       |      |          |         |           |         | a        | a         |
| g                         | 4945739                 | g                    | 4961968                   | a                | 4911453               | s                 | S88                          | rec36               | g                                    | S88                                   | ++                         | g      | g    | g   | a        | g       | g    | g      | g    | g         | g  | a        | a      | a     | g      | g   | g       |      |          |         |           |         | g        | g         |
| a                         | 4945742                 | a                    | 4961971                   | g                | 4911456               | s                 | S88                          | rec36               | a                                    | S88                                   | ++                         | a      | a    | a   | g        | a       | a    | a      | a    | a         | a  | g        | g      | g     | a      | a   | a       |      |          |         |           |         | a        | a         |
| g                         | 4945748                 | g                    | 4961977                   | a                | 4911462               | ns                | S88                          | rec36               | g                                    | S88                                   | ++                         | g      | g    | g   | a        | g       | g    | g      | g    | g         | g  | a        | a      | a     | g      | g   | g       |      |          |         |           |         | g        | g         |
| c                         | 4945749                 | c                    | 4961978                   | g                | 4911463               | ns                | S88                          | rec36               | c                                    | S88                                   | ++                         | c      | c    | c   | g        | c       | c    | c      | c    | c         | c  | g        | g      | g     | c      | c   | c       |      |          |         |           |         | c        | c         |
| g                         | 4945750                 | g                    | 4961979                   | a                | 4911464               | ns                | S88                          | rec36               | g                                    | S88                                   | ++                         | g      | g    | g   | a        | g       | g    | g      | g    | g         | g  | a        | a      | a     | g      | g   | g       |      |          |         |           |         | g        | g         |
| a                         | 4945751                 | a                    | 4961980                   | g                | 4911465               | s                 | S88                          | rec36               | a                                    | S88                                   | ++                         | a      | a    | a   | g        | a       | a    | a      | a    | a         | a  | g        | g      | g     | a      | a   | a       |      |          |         |           |         | a        | a         |
| a                         | 4945754                 | a                    | 4961983                   | g                | 4911468               | s                 | S88                          | rec36               | a                                    | S88                                   | ++                         | a      | a    | a   | g        | a       | a    | a      | a    | a         | a  | g        | g      | g     | a      | a   | a       |      |          |         |           |         | a        | a         |
| g                         | 4945757                 | g                    | 4961986                   | a                | 4911471               | s                 | S88                          | rec36               | g                                    | S88                                   | ++                         | g      | g    | g   | a        | g       | a    | a      | a    | a         | a  | a        | a      | a     | a      | g   | a       |      |          |         |           |         | a        | a         |
| a                         | 4945762                 | a                    | 4961991                   | g                | 4911476               | s                 | S88                          | rec36               | a                                    | S88                                   | ++                         | a      | a    | a   | g        | a       | a    | a      | a    | a         | a  | g        | g      | g     | a      | a   | a       |      |          |         |           |         | a        | a         |
| t                         | 4945763                 | t                    | 4961992                   | c                | 4911477               | s                 | S88                          | rec36               | t                                    | S88                                   | ++                         | t      | t    | t   | c        | t       | c    | c      | c    | c         | c  | c        | c      | c     | c      | t   | c       |      |          |         |           |         | c        | c         |
| a                         | 4945772                 | a                    | 4962001                   | g                | 4911486               | s                 | S88                          | rec36               | a                                    | S88                                   | ++                         | a      | a    | a   | g        | a       | a    | a      | a    | a         | a  | g        | g      | g     | a      | a   | a       |      |          |         |           |         | a        | a         |
| g                         | 4945775                 | g                    | 4962004                   | a                | 4911489               | s                 | S88                          | rec36               | g                                    | S88                                   | ++                         | g      | g    | g   | a        | g       | g    | g      | g    | g         | g  | a        | a      | a     | g      | g   | g       |      |          |         |           |         | g        | g         |
| a                         | 4945778                 | a                    | 4962007                   | g                | 4911492               | s                 | S88                          | rec36               | a                                    | S88                                   | ++                         | a      | a    | a   | g        | a       | a    | a      | a    | a         | a  | g        | g      | g     | a      | a   | a       |      |          |         |           |         | a        | a         |
| g                         | 4945781                 | g                    | 4962010                   | a                | 4911495               | s                 | S88                          | rec36               | g                                    | S88                                   | ++                         | g      | g    | g   | a        | g       | g    | g      | g    | g         | g  | a        | a      | a     | g      | g   | g       |      |          |         |           |         | g        | g         |
| g                         | 4945787                 | g                    | 4962016                   | t                | 4911501               | ns                | S88                          | rec36               | g                                    | S88                                   | ++                         | g      | g    | g   | t        | g       | g    | g      | g    | g         | g  | t        | t      | t     | g      | g   | g       |      |          |         |           |         | g        | g         |
| a                         | 4945789                 | a                    | 4962018                   | t                | 4911503               | ns                | S88                          | rec36               | a                                    | S88                                   | ++                         | a      | a    | a   | t        | a       | a    | a      | a    | a         | a  | t        | t      | t     | a      | a   | a       |      |          |         |           |         | a        | a         |
| g                         | 4945798                 | g                    | 4962027                   | a                | 4911512               | s                 | S88                          | rec36               | g                                    | S88                                   | ++                         | g      | g    | g   | a        | g       | g    | g      | g    | g         | g  | a        | a      | a     | g      | g   | g       |      |          |         |           |         | g        | g         |
| c                         | 4945799                 | c                    | 4962028                   | t                | 4911513               | s                 | S88                          | rec36               | c                                    | S88                                   | ++                         | c      | c    | c   | t        | c       | c    | c      | c    | c         | c  | t        | t      | t     | c      | c   | c       |      |          |         |           |         | c        | c         |
| t                         | 4945808                 | t                    | 4962037                   | a                | 4911522               | s                 | S88                          | rec36               | t                                    | S88                                   | ++                         | t      | t    | t   | a        | t       | t    | t      | t    | t         | t  | a        | a      | a     | t      | t   | t       |      |          |         |           |         | t        | t         |
| t                         | 4945823                 | t                    | 4962052                   | g                | 4911537               | ns                | S88                          | rec36               | t                                    | S88                                   | ++                         | t      | t    | t   | g        | t       | t    | t      | t    | t         | t  | g        | g      | g     | t      | t   | t       |      |          |         |           |         | t        | t         |
| t                         | 4945824                 | t                    | 4962053                   | c                | 4911538               | ns                | S88                          | rec36               | t                                    | S88                                   | ++                         | t      | t    | t   | c        | t       | t    | t      | t    | t         | t  | c        | c      | c     | t      | t   | t       |      |          |         |           |         | t        | t         |
| g                         | 4945835                 | g                    | 4962064                   | c                | 4911549               | ns                | S88                          | rec36               | g                                    | S88                                   | ++++                       | g      | g    | g   | c        | g       | g    | g      | g    | g         | g  | g        | g      | g     | g      | g   | g       |      |          |         |           |         | g        | g         |
| t                         | 4945837                 | t                    | 4962066                   | c                | 4911551               | ns                | S88                          | rec36               | t                                    | S88                                   | ++                         | t      | t    | t   | a        | t       | t    | t      | t    | t         | t  | a        | a      | a     | t      | t   | t       |      |          |         |           |         | t        | t         |
| t                         | 4945838                 | t                    | 4962067                   | a                | 4911552               | ns                | S88                          | rec36               | t                                    | S88                                   | ++                         | t      | t    | t   | a        | t       | t    | t      | t    | t         | t  | a        | a      | a     | t      | t   | t       |      |          |         |           |         | t        | t         |
| g                         | 4945840                 | g                    | 4962069                   | c                | 4911554               | ns                | S88                          | rec36               | g                                    | S88                                   | ++                         | g      | g    | g   | c        | g       | g    | g      | g    | g         | g  | c        | c      | c     | g      | g   | g       |      |          |         |           |         | g        | g         |
| g                         | 4945842                 | g                    | 4962071                   | t                | 4911556               | ns                | S88                          | rec36               | g                                    | S88                                   | ++                         | g      | g    | g   | t        | g       | g    | g      | g    | g         | g  | t        | t      | t     | g      | g   | g       |      |          |         |           |         | g        | g         |
| c                         | 4945844                 | c                    | 4962073                   | a                | 4911558               | s                 | S88                          | rec36               | c                                    | S88                                   | ++                         | c      | c    | c   | a        | c       | c    | c      | c    | c         | c  | a        | a      | a     | c      | c   | c       |      |          |         |           |         | c        | c         |
| a                         | 4945865                 | a                    | 4962094                   | g                | 4911579               | s                 | S88                          | rec36               | a                                    | S88                                   | ++                         | a      | a    | a   | g        | a       | g    | g      | g    | g         | g  | g        | g      | g     | g      | a   | g       |      |          |         |           |         | g        | g         |
| a                         | 4945868                 | a                    | 4962097                   | g                | 4911582               | s                 | S88                          | rec36               | a                                    | S88                                   | ++                         | a      | a    | a   | g        | a       | a    | a      | a    | a         | a  | g        | g      | g     | a      | a   | a       |      |          |         |           |         | a        | a         |
| g                         | 4945871                 | g                    | 4962100                   | a                | 4911585               | s                 | S88                          | rec36               | g                                    | S88                                   | ++                         | g      | g    | g   | a        | g       | g    | g      | g    | g         | g  | a        | a      | a     | g      | g   | g       |      |          |         |           |         | g        | g         |
| c                         | 4945874                 | c                    | 4962103                   | t                | 4911588               | s                 | S88                          | rec36               | c                                    | S88                                   | ++                         | c      | c    | c   | t        | c       | c    | c      | c    | c         | c  | t        | t      | t     | c      | c   | c       |      |          |         |           |         | c        | c         |
| g                         | 4945880                 | g                    | 4962109                   | a                | 4911594               | s                 | S88                          | rec36               | g                                    | S88                                   | ++                         | g      | g    | g   | a        | g       | g    | g      | g    | g         | g  | a        | a      | a     | g      | g   | g       |      |          |         |           |         | g        | g         |
| a                         | 4945883                 | a                    | 4962112                   | g                | 4911597               | s                 | S88                          | rec36               | a                                    | S88                                   | ++                         | a      | a    | a   | g        | a       | a    | a      | a    | a         | a  | g        | g      | g     | a      | a   | a       |      |          |         |           |         | a        | a         |
| c                         | 4945892                 | c                    | 4962121                   | t                | 4911606               | ns                | S88                          | rec36               | c                                    | S88                                   | ++                         | c      | c    | c   | t        | c       | c    | c      | c    | c         | c  | t        | t      | t     | c      | c   | c       |      |          |         |           |         | c        | c         |
| g                         | 4945894                 | g                    | 4962123                   | t                | 4911608               | ns                | S88                          | rec36               | g                                    | S88                                   | ++                         | g      | g    | g   | t        | g       | g    | g      | g    | g         | g  | t        | t      | t     | g      | g   | g       |      |          |         |           |         | g        | g         |
| g                         | 4945901                 | g                    | 4962130                   | a                | 4911615               | s                 | S88                          | rec36               | g                                    | S88                                   | ++                         | g      | g    | g   | a        | g       | g    | g      | g    | g         | g  | a        | a      | a     | g      | g   | g       |      |          |         |           |         | g        | g         |
| g                         | 4945913                 | g                    | 4962142                   | a                | 4911627               | s                 | S88                          | rec36               | g                                    | S88                                   | ++                         | g      | g    | g   | a        | g       | g    | g      | g    | g         | g  | a        | a      | a     | g      | g   | g       |      |          |         |           |         | g        | g         |
| c                         | 4945940                 | c                    | 4962169                   | g                | 4911654               | s                 | S88                          | rec36               | c                                    | S88                                   | ++                         | c      | c    | c   | g        | c       | c    | c      | c    | c         | c  | g        | g      | g     | c      | c   | c       |      |          |         |           |         | c        | c         |
| a                         | 4945943                 | a                    | 4962172                   | c                | 4911657               | s                 | S88                          | rec36               | a                                    | S88                                   | ++                         | a      | a    | a   | c        | a       | a    | a      | a    | a         | a  | c        | c      | c     | a      | a   | a       |      |          |         |           |         | a        | a         |
|                           |                         |                      |                           |                  |                       |                   |                              |                     |                                      |                                       |                            |        |      |     |          |         |      |        |      |           |    |          |        |       |        |     |         |      |          |         |           |         |          |           |

Table S8. Allocation of recombinational SNPs to lineages by virtual outgroup analysis<sup>a</sup>

| ExPEC genome site details |                         |                      |                           |                  |                       |                   |                             |                     |                                      | Outgroup Strains Details <sup>1</sup> |                            |        |      |     |          |         |      |        |      |           |    |          |        |       |        |     |         |      |          |         |           |         |          |           |   |   |
|---------------------------|-------------------------|----------------------|---------------------------|------------------|-----------------------|-------------------|-----------------------------|---------------------|--------------------------------------|---------------------------------------|----------------------------|--------|------|-----|----------|---------|------|--------|------|-----------|----|----------|--------|-------|--------|-----|---------|------|----------|---------|-----------|---------|----------|-----------|---|---|
| UT189 <sup>b</sup>        | UTI89 site <sup>c</sup> | APEC 01 <sup>b</sup> | APEC 01 site <sup>c</sup> | S88 <sup>b</sup> | S88 site <sup>c</sup> | type <sup>d</sup> | Event Lineage <sup>ef</sup> | Recombinant segment | Inferred ancestral base <sup>g</sup> | Outgroup Analysis <sup>g</sup>        | Support level <sup>h</sup> | CFT073 | ED1a | 536 | E2348/69 | SMS 3-5 | IA39 | UMN026 | K-12 | ATCC 8739 | HS | D1 Sd197 | CB9615 | Sakai | EDL933 | IA1 | E24377A | SE11 | SS Ss046 | F2a 301 | F2a 2457T | F5 8401 | B4 Sd227 | B18 BS512 |   |   |
| g                         | 4946112                 | g                    | 4962341                   | c                | 4911826               | ns                | S88                         | rec36               | g                                    | S88                                   | ++                         | g      |      | g   | g        | c       | g    | g      | g    | g         | g  | c        | c      | c     | g      | g   | g       |      |          |         |           |         | g        | g         |   |   |
| a                         | 4946113                 | a                    | 4962342                   | c                | 4911827               | ns                | S88                         | rec36               | a                                    | S88                                   | ++                         | a      |      | a   | a        | c       | g    | a      | a    | a         | a  | c        | c      | c     | a      | a   | a       |      |          |         |           |         | a        | a         |   |   |
| t                         | 4946117                 | t                    | 4962346                   | g                | 4911831               | ns                | S88                         | rec36               | t                                    | S88                                   | ++                         | t      |      | t   | t        | g       | t    | t      | t    | t         | t  | g        | g      | g     | t      | t   | t       |      |          |         |           |         | t        | t         |   |   |
| g                         | 4946118                 | g                    | 4962347                   | a                | 4911832               | ns                | S88                         | rec36               | g                                    | S88                                   | ++                         | g      |      | g   | g        | a       | g    | g      | g    | g         | g  | g        | a      | a     | a      | g   | g       | g    |          |         |           |         |          | g         | g |   |
| a                         | 4946123                 | a                    | 4962352                   | c                | 4911837               | ns                | S88                         | rec36               | a                                    | S88                                   | ++                         | a      |      | a   | a        | c       | a    | a      | a    | a         | a  | c        | c      | c     | a      | a   | a       |      |          |         |           |         | a        | a         |   |   |
| t                         | 4946125                 | t                    | 4962354                   | g                | 4911839               | ns                | S88                         | rec36               | t                                    | S88                                   | ++                         | t      |      | t   | t        | g       | t    | t      | t    | t         | t  | g        | g      | g     | t      | t   | t       |      |          |         |           |         | t        | t         |   |   |
| g                         | 4946136                 | g                    | 4962365                   | a                | 4911850               | ns                | S88                         | rec36               | g                                    | S88                                   | ++                         | g      |      | g   | g        | a       | g    | g      | g    | g         | g  | a        | a      | a     | g      | g   | g       |      |          |         |           |         | g        | g         |   |   |
| a                         | 4946141                 | a                    | 4962370                   | g                | 4911855               | s                 | S88                         | rec36               | a                                    | S88                                   | ++                         | a      |      | a   | a        | g       | a    | a      | a    | a         | a  | g        | g      | g     | a      | a   | a       |      |          |         |           |         | a        | a         |   |   |
| a                         | 4946388                 | a                    | 4962617                   | t                | 4914690               | s                 | S88                         | rec36               | a                                    | S88                                   | ++                         | a      |      | a   | a        | t       | a    | t      | t    | t         | t  | a        | t      | t     | t      | a   | t       |      |          |         |           |         | t        | t         |   |   |
| a                         | 4946400                 | a                    | 4962629                   | g                | 4914702               | s                 | S88                         | rec36               | a                                    | S88                                   | ++                         | a      |      | a   | a        | g       | a    | g      | g    | g         | g  | a        | g      | g     | g      | a   | g       |      |          |         |           |         | g        | g         |   |   |
| g                         | 4946499                 | g                    | 4962728                   | a                | 4914801               | s                 | S88                         | rec36               | g                                    | S88                                   | ++++                       | g      |      | g   | g        | g       | g    | g      | g    | g         | g  | g        | g      | g     | g      | g   | g       |      |          |         |           |         | g        | g         |   |   |
| c                         | 4946538                 | c                    | 4962767                   | t                | 4914840               | s                 | S88                         | rec36               | c                                    | S88                                   | ++                         | c      |      | c   | c        | t       | c    | t      | t    | t         | t  | t        | t      | t     | t      | c   | t       |      |          |         |           |         | t        | t         |   |   |
| g                         | 4946540                 | g                    | 4962769                   | a                | 4914842               | s                 | S88                         | rec36               | g                                    | S88                                   | ++                         | g      |      | g   | g        | a       | g    | a      | a    | a         | a  | g        | a      | a     | a      | a   | g       | a    |          |         |           |         |          | a         | a |   |
| t                         | 4946542                 | t                    | 4962771                   | a                | 4914844               | ns                | S88                         | rec36               | t                                    | S88                                   | ++                         | t      |      | t   | t        | a       | t    | a      | a    | a         | a  | t        | a      | a     | a      | a   | t       | a    |          |         |           |         |          | a         | a |   |
| g                         | 4946553                 | g                    | 4962782                   | c                | 4914855               | ns                | S88                         | rec36               | g                                    | S88                                   | ++                         | g      |      | g   | g        | c       | g    | c      | c    | c         | c  | g        | c      | c     | c      | c   | g       | c    |          |         |           |         |          | c         | c |   |
| c                         | 4946554                 | c                    | 4962783                   | g                | 4914856               | ns                | S88                         | rec36               | c                                    | S88                                   | ++                         | c      |      | c   | c        | g       | c    | g      | g    | g         | g  | g        | g      | g     | g      | g   | g       | c    | g        |         |           |         |          |           | g | g |
| t                         | 4946565                 | t                    | 4962794                   | a                | 4914867               | ns                | S88                         | rec36               | t                                    | S88                                   | ++                         | t      |      | t   | t        | a       | t    | a      | a    | a         | a  | t        | a      | a     | a      | a   | t       | a    |          |         |           |         |          | a         | a |   |
| g                         | 4946566                 | g                    | 4962795                   | c                | 4914868               | ns                | S88                         | rec36               | g                                    | S88                                   | ++                         | g      |      | g   | g        | c       | g    | c      | c    | c         | c  | g        | c      | c     | c      | c   | g       | c    |          |         |           |         |          | c         | c |   |
| c                         | 4946567                 | c                    | 4962796                   | t                | 4914869               | s                 | S88                         | rec36               | c                                    | S88                                   | ++                         | c      |      | c   | c        | t       | c    | t      | t    | t         | t  | c        | t      | t     | t      | t   | c       | t    |          |         |           |         |          | t         | t |   |
| g                         | 4946570                 | g                    | 4962799                   | c                | 4914872               | s                 | S88                         | rec36               | c                                    | S88                                   | ++                         | c      |      | c   | c        | t       | c    | t      | t    | t         | t  | c        | t      | t     | t      | t   | c       | t    |          |         |           |         |          | t         | t |   |
| c                         | 4946576                 | c                    | 4962805                   | a                | 4914878               | s                 | S88                         | rec36               | g                                    | S88                                   | ++                         | g      |      | g   | g        | a       | g    | a      | a    | a         | a  | g        | a      | a     | a      | a   | g       | a    |          |         |           |         |          | a         | a |   |
| c                         | 4946579                 | c                    | 4962808                   | t                | 4914881               | s                 | S88                         | rec36               | c                                    | S88                                   | ++                         | c      |      | c   | c        | t       | c    | t      | t    | t         | t  | c        | t      | t     | t      | t   | c       | t    |          |         |           |         |          | t         | t |   |
| c                         | 4946585                 | c                    | 4962814                   | t                | 4914887               | s                 | S88                         | rec36               | c                                    | S88                                   | ++++                       | c      |      | c   | c        | t       | c    | c      | c    | c         | c  | c        | c      | c     | c      | c   | c       | c    |          |         |           |         |          | c         | c |   |
| a                         | 4946597                 | a                    | 4962826                   | g                | 4914899               | s                 | S88                         | rec36               | a                                    | S88                                   | ++                         | a      |      | a   | a        | g       | a    | g      | g    | g         | g  | a        | g      | g     | g      | g   | a       | g    |          |         |           |         |          | g         | g |   |
| g                         | 4946603                 | g                    | 4962832                   | a                | 4914905               | s                 | S88                         | rec36               | g                                    | S88                                   | ++                         | g      |      | g   | g        | a       | g    | a      | a    | a         | a  | g        | a      | a     | a      | a   | g       | a    |          |         |           |         |          | a         | a |   |
| g                         | 4946618                 | g                    | 4962847                   | a                | 4914920               | s                 | S88                         | rec36               | g                                    | S88                                   | ++                         | g      |      | g   | g        | a       | g    | a      | a    | a         | a  | g        | a      | a     | a      | a   | g       | g    |          |         |           |         |          | a         | a |   |
| a                         | 4946621                 | a                    | 4962850                   | g                | 4914923               | s                 | S88                         | rec36               | a                                    | S88                                   | ++                         | a      |      | a   | a        | g       | a    | g      | g    | g         | g  | a        | g      | g     | g      | g   | a       | g    |          |         |           |         |          | g         | g |   |
| a                         | 4946647                 | a                    | 4962876                   | t                | 4914949               | ns                | S88                         | rec36               | t                                    | 2                                     | -                          | t      |      | t   | t        | t       | t    | a      | a    | a         | a  | t        | a      | a     | a      | a   | t       | a    |          |         |           |         |          | a         | a |   |
| g                         | 4946653                 | g                    | 4962882                   | a                | 4914955               | s                 | S88                         | rec36               | g                                    | S88                                   | ++++                       | g      |      | g   | g        | a       | g    | g      | g    | g         | g  | g        | g      | g     | g      | g   | g       | g    |          |         |           |         |          | g         | g |   |
| g                         | 4946768                 | g                    | 4962997                   | a                | 4915070               | s                 | S88                         | rec36               | g                                    | S88                                   | ++                         | g      |      | g   | g        | a       | g    | g      | g    | g         | g  | g        | g      | g     | g      | g   | g       | g    |          |         |           |         |          | g         | g |   |
| t                         | 4946789                 | t                    | 4963018                   | g                | 4915091               | s                 | S88                         | rec36               | t                                    | S88                                   | ++                         | t      |      | t   | t        | g       | g    | g      | g    | g         | g  | g        | g      | g     | g      | g   | t       | g    |          |         |           |         |          | g         | g |   |
| a                         | 4946798                 | a                    | 4963027                   | t                | 4915100               | s                 | S88                         | rec36               | a                                    | S88                                   | ++                         | a      |      | a   | a        | t       | t    | t      | t    | t         | t  | t        | t      | t     | t      | t   | a       | t    |          |         |           |         |          | t         | t |   |
| a                         | 4946825                 | a                    | 4963054                   | g                | 4915127               | s                 | S88                         | rec36               | a                                    | S88                                   | ++                         | a      |      | a   | a        | g       | a    | a      | g    | g         | g  | a        | a      | a     | a      | a   | g       | a    |          |         |           |         |          | g         | g |   |
| t                         | 4946834                 | t                    | 4963063                   | c                | 4915136               | s                 | S88                         | rec36               | t                                    | S88                                   | ++++                       | t      |      | t   | t        | t       | t    | t      | t    | t         | t  | t        | t      | t     | t      | t   | t       | t    |          |         |           |         |          | t         | t |   |
| g                         | 4946837                 | g                    | 4963066                   | a                | 4915139               | s                 | S88                         | rec36               | g                                    | S88                                   | ++++                       | g      |      | g   | g        | g       | g    | g      | g    | g         | g  | g        | g      | g     | g      | g   | g       | g    |          |         |           |         |          | g         | g |   |
| g                         | 4946852                 | g                    | 4963081                   | c                | 4915154               | s                 | S88                         | rec36               | g                                    | S88                                   | ++++                       | g      |      | g   | g        | g       | g    | g      | g    | g         | g  | g        | g      | g     | g      | g   | g       | g    |          |         |           |         |          | g         | g |   |
| c                         | 4946888                 | c                    | 4963117                   | t                | 4915190               | s                 | S88                         | rec36               | t                                    | 2                                     | -                          | t      |      | t   | t        | t       | c    | t      | c    | t         | t  | t        | t      | t     | t      | t   | t       | t    |          |         |           |         |          | t         | t |   |
| t                         | 4946891                 | t                    | 4963120                   | c                | 4915193               | s                 | S88                         | rec36               | c                                    | 2                                     | -                          | c      |      | c   | c        | c       | c    | c      | c    | c         | c  | c        | c      | c     | c      | c   | c       | c    |          |         |           |         |          | c         | c |   |
| c                         | 4946896                 | c                    | 4963125                   | t                | 4915198               | ns                | S88                         | rec36               | c                                    | S88                                   | ++++                       | c      |      | c   | c        | c       | c    | c      | c    | c         | c  | c        | c      | c     | c      | c   | c       | c    |          |         |           |         |          | c         | c |   |
| a                         | 4946990                 | a                    | 4963219                   | g                | 4915292               | s                 | S88                         | rec36               | a                                    | S88                                   | ++++                       | a      |      | a   | a        | a       | a    | a      | a    | a         | a  | a        | a      | a     | a      | a   | a       | a    |          |         |           |         |          | a         | a |   |
| a                         | 4947020                 | a                    | 4963249                   | c                | 4915322               | s                 | S88                         | rec36               | a                                    | S88                                   | ++++                       | a      |      | a   | a        | a       | a    | g      | a    | a         | a  | a        | a      | a     | a      | a   | a       | a    |          |         |           |         |          | a         | a |   |
| c                         | 4947038                 | c                    | 4963267                   | t                | 4915340               | s                 | S88                         | rec36               | c                                    | S88                                   | ++                         | c      |      | c   | c        | t       | c    | c      | c    | c         | c  | c        | c      | c     | c      | c   | c       | c    |          |         |           |         |          | c         | c |   |
| t                         | 4947054                 | t                    | 4963283                   | g                | 4915356               | ns                | S88                         | rec36               | t                                    | S88                                   | ++                         | t      |      | t   | t        | t       | g    | t      | g    | g         | g  | g        | g      | g     | g      | g   | t       | g    |          |         |           |         |          | g         | g |   |
| c                         | 4947089                 | c                    | 4963318                   | t                | 4915391               | s                 | S88                         | rec36               | t                                    | 2                                     | -                          | t      |      | t   | t        | t       | c    | t      | t    | t         | t  | t        | t      | t     | t      | t   | t       | t    |          |         |           |         |          | t         | t |   |
| t                         | 4947098                 | t                    | 4963327                   | c                | 4915400               | s                 | S88                         | rec36               | t                                    | S88                                   | ++                         | t      |      | c   | t        | c       | t    | c      | c    | t         | t  | c        | t      | t     | t      | t   | t       | t    |          |         |           |         |          | t         | t |   |
| t                         | 4947155                 | t                    | 4963384                   | c                | 4915457               | s                 | S88                         | rec36               | c                                    | 2                                     | -                          | c      |      | c   | c        | c       | c    | c      | c    | c         | c  | c        | c      | c     | c      | c   | c       | c    |          |         |           |         |          | c         | c |   |
| c                         | 4947161                 | c                    | 4963390                   | t                | 4915463               | s                 | S88                         | rec36               | c                                    | S88                                   | ++                         | c      |      | c   | c        | t       | c    | c      | c    | c         | c  | c        | c      | c     | c      | c   | c       | c    |          |         |           |         |          | c         | c |   |
| g                         | 4947175                 | g                    | 4963404                   | a                | 4915477               | ns                | S88                         | rec36               | g                                    | S88                                   | ++++                       | g      |      | g   | g        | g       | g    | g      | g    | g         | g  | g        | g      | g     | g      | g   | g       | g    |          |         |           |         |          | g         | g |   |
| t                         | 4947221                 | t                    | 4963450                   | g                | 4915523               | s                 | S88                         | rec36               | t                                    | S88                                   | ++                         | t      |      | t   | t        | t       | t    | g      | g    | t         | t  | t        | t      | t     | t      | t   | t       | t    |          |         |           |         |          | t         | t |   |
| a                         | 4947257                 | a                    | 4963486                   | t                | 4915559               | s                 | S88                         | rec36               | a                                    | S88                                   | ++                         | a      |      | a   | a        | t       | a    | t      | t    | t         | t  | t        | t      | t     | t      | t   | a       | t    |          |         |           |         |          | t         | t |   |
| t                         | 4947280                 | t                    | 4963509                   | c                | 4915582               | ns                | S88                         | rec36               | c                                    | 2                                     | -                          | c      |      | c   | c        | c       | t    | c      | c    | c         | c  | c        | c      | c     | c      | c   | c       | c    |          |         |           |         |          | c         | c |   |
| t                         | 4947313                 | t                    | 4963542                   | c                | 4915615               | ns                | S88                         | rec36               | t                                    | S88                                   | ++                         | t      |      | t   | t        | c       | t    | c      | c    | t         | t  | c        | t      | t     | t      | t   | t       | t    |          |         |           |         |          | t         | t |   |
| a                         | 4947353                 | a                    | 4963582                   | g                | 4915655               | s                 | S88                         | rec36               | a                                    | S88                                   | ++++                       | a      |      | a   | a        | a       | a    | a      | a    | a         | a  | a        | a      | a     | a      | a   | a       | a    |          |         |           |         |          | a         | a |   |
| a                         | 4947521                 | a                    | 4963750                   | c                | 4915823               | s                 | S88                         | rec36               | a                                    | S88                                   | ++                         | a      |      | a   | a        | a       | a    | c      | c    | c         | c  | a        | c      | c     | c      | c   | a       | c    |          |         |           |         |          | c         | c |   |
| g                         | 4947541                 | g                    | 4963770                   | t                | 4915843               | ns                | S88                         | rec36               | g                                    | S88                                   |                            |        |      |     |          |         |      |        |      |           |    |          |        |       |        |     |         |      |          |         |           |         |          |           |   |   |

Table S8. Allocation of recombinational SNPs to lineages by virtual outgroup analysis<sup>a</sup>

| ExPEC genome site details |                         |                      |                           |                  |                       |                   |                             |                     |                                      | Outgroup Strains Details <sup>1</sup> |                            |        |      |     |          |         |      |        |      |           |    |          |        |       |        |     |         |      |          |         |           |         |          |           |   |
|---------------------------|-------------------------|----------------------|---------------------------|------------------|-----------------------|-------------------|-----------------------------|---------------------|--------------------------------------|---------------------------------------|----------------------------|--------|------|-----|----------|---------|------|--------|------|-----------|----|----------|--------|-------|--------|-----|---------|------|----------|---------|-----------|---------|----------|-----------|---|
| UT189 <sup>b</sup>        | UTI89 site <sup>c</sup> | APEC 01 <sup>b</sup> | APEC 01 site <sup>c</sup> | S88 <sup>b</sup> | S88 site <sup>c</sup> | type <sup>d</sup> | Event Lineage <sup>ef</sup> | Recombinant segment | Inferred ancestral base <sup>g</sup> | Outgroup Analysis <sup>h</sup>        | Support level <sup>h</sup> | CFT073 | ED1a | 536 | E2348/69 | SMS 3-5 | IA39 | UMN026 | K-12 | ATCC 8739 | HS | D1 Sd197 | CB9615 | Sakai | EDL933 | IA1 | E24377A | SE11 | SS Ss046 | F2a 301 | F2a 2457T | F5 8401 | B4 Sb227 | B18 BS512 |   |
| t                         | 4948650                 | t                    | 4964879                   | c                | 4916952               | s                 | S88                         | rec36               | t                                    | S88                                   | ++                         | t      | t    | t   | t        | c       | t    | c      | c    | c         | c  | c        | c      | c     | c      | c   | t       | c    |          |         |           |         | c        | c         |   |
| g                         | 4948686                 | g                    | 4964915                   | a                | 4916988               | s                 | S88                         | rec36               | g                                    | S88                                   | ++                         | g      | g    | g   | g        | g       | g    | a      | a    | a         | a  | a        | g      | g     | g      | g   | g       | g    |          |         |           |         | g        | g         |   |
| g                         | 4948695                 | g                    | 4964924                   | c                | 4916997               | s                 | S88                         | rec36               | g                                    | S88                                   | ++                         | g      | g    | g   | g        | c       | g    | c      | c    | c         | c  | c        | c      | c     | c      | c   | g       | c    |          |         |           |         | c        | c         |   |
| t                         | 4948740                 | t                    | 4964969                   | c                | 4917042               | s                 | S88                         | rec36               | t                                    | S88                                   | ++                         | t      | t    | t   | t        | c       | t    | c      | c    | c         | c  | c        | c      | c     | g      | g   | c       | t    | c        |         |           |         |          | a         | a |
| g                         | 4948743                 | g                    | 4964972                   | a                | 4917045               | s                 | S88                         | rec36               | g                                    | S88                                   | ++                         | g      | g    | g   | g        | a       | g    | a      | a    | a         | a  | a        | a      | a     | a      | a   | a       | g    | a        |         |           |         |          | a         | a |
| g                         | 4948761                 | g                    | 4964990                   | a                | 4917063               | s                 | S88                         | rec36               | g                                    | S88                                   | ++                         | g      | g    | a   | g        | a       | g    | a      | a    | g         | a  | a        | a      | a     | a      | a   | a       | g    | a        |         |           |         |          | a         | a |
| a                         | 4948776                 | a                    | 4965005                   | c                | 4917078               | s                 | S88                         | rec36               | a                                    | S88                                   | ++                         | a      | a    | a   | a        | c       | a    | c      | c    | c         | c  | c        | c      | c     | c      | c   | c       | a    | c        |         |           |         |          | c         | c |
| g                         | 4948788                 | g                    | 4965017                   | a                | 4917090               | s                 | S88                         | rec36               | g                                    | S88                                   | ++                         | g      | g    | g   | g        | g       | g    | g      | g    | g         | g  | g        | g      | g     | g      | g   | g       | g    | g        |         |           |         |          | g         | g |
| a                         | 4948803                 | a                    | 4965032                   | g                | 4917105               | s                 | S88                         | rec36               | a                                    | S88                                   | ++                         | a      | a    | a   | a        | g       | a    | g      | g    | g         | g  | g        | g      | g     | g      | g   | g       | g    | g        |         |           |         |          | g         | g |
| t                         | 4948812                 | t                    | 4965041                   | c                | 4917114               | s                 | S88                         | rec36               | t                                    | S88                                   | ++                         | t      | t    | t   | t        | c       | t    | c      | c    | c         | c  | c        | c      | c     | c      | c   | c       | t    | c        |         |           |         |          | c         | c |
| g                         | 4948824                 | g                    | 4965053                   | c                | 4917126               | s                 | S88                         | rec36               | c                                    | 2                                     | -                          | c      | c    | g   | c        | c       | c    | a      | a    | a         | c  | c        | c      | c     | c      | c   | c       | c    | c        |         |           |         |          | c         | c |
| c                         | 4948887                 | c                    | 4965116                   | a                | 4917189               | s                 | S88                         | rec36               | a                                    | 2                                     | -                          | a      | a    | c   | a        | a       | a    | a      | a    | a         | a  | a        | a      | a     | a      | a   | a       | a    | a        |         |           |         |          | a         | a |
| t                         | 4948931                 | t                    | 4965160                   | c                | 4917233               | ns                | S88                         | rec36               | t                                    | S88                                   | ++++                       | t      | t    | t   | t        | t       | t    | t      | t    | t         | t  | t        | t      | t     | t      | t   | t       | t    | t        |         |           |         |          | t         | t |
| g                         | 4948992                 | g                    | 4965221                   | a                | 4917294               | s                 | S88                         | rec36               | a                                    | 2                                     | -                          | a      | a    | a   | a        | a       | a    | a      | a    | g         | a  | a        | g      | g     | g      | a   | a       | a    | a        |         |           |         |          | a         | a |
| c                         | 4948995                 | c                    | 4965224                   | t                | 4917297               | s                 | S88                         | rec36               | t                                    | 2                                     | -                          | t      | t    | t   | t        | t       | t    | t      | t    | t         | t  | t        | t      | t     | t      | t   | t       | t    | t        |         |           |         |          | t         | t |
| g                         | 4949013                 | g                    | 4965242                   | a                | 4917315               | s                 | S88                         | rec36               | g                                    | S88                                   | ++                         | g      | g    | g   | g        | g       | g    | g      | g    | a         | a  | g        | g      | g     | g      | a   | g       | a    |          |         |           |         | a        | a         |   |
| g                         | 4949060                 | g                    | 4965289                   | a                | 4917362               | s                 | S88                         | rec36               | g                                    | S88                                   | ++                         | g      | g    | g   | g        | g       | a    | g      | g    | g         | a  | a        | a      | a     | a      | a   | a       | g    | a        |         |           |         |          | g         | g |
| g                         | 4949079                 | g                    | 4965308                   | a                | 4917381               | s                 | S88                         | rec36               | a                                    | 2                                     | -                          | a      | a    | a   | a        | g       | a    | g      | g    | c         | a  | a        | a      | a     | a      | a   | a       | g    | a        |         |           |         |          | a         | a |
| t                         | 4949086                 | t                    | 4965315                   | c                | 4917388               | ns                | S88                         | rec36               | c                                    | 2                                     | -                          | c      | c    | c   | c        | c       | c    | c      | c    | c         | c  | c        | c      | c     | c      | c   | c       | c    | c        |         |           |         |          | c         | c |
| g                         | 4949100                 | g                    | 4965329                   | a                | 4917402               | s                 | S88                         | rec36               | g                                    | S88                                   | ++                         | g      | g    | g   | g        | g       | g    | g      | g    | g         | a  | g        | g      | g     | g      | a   | g       | a    |          |         |           |         | a        | a         |   |
| g                         | 4949196                 | g                    | 4965425                   | a                | 4917498               | s                 | S88                         | rec36               | g                                    | S88                                   | ++                         | g      | g    | g   | g        | g       | g    | g      | g    | a         | g  | g        | g      | g     | g      | a   | g       | a    |          |         |           |         | a        | a         |   |
| t                         | 4949217                 | t                    | 4965446                   | c                | 4917519               | s                 | S88                         | rec36               | t                                    | S88                                   | ++                         | t      | t    | t   | t        | t       | t    | t      | t    | c         | t  | t        | t      | t     | t      | c   | t       | c    |          |         |           |         | c        | c         |   |
| t                         | 4949268                 | t                    | 4965497                   | c                | 4917570               | s                 | S88                         | rec36               | t                                    | S88                                   | ++                         | c      | t    | t   | c        | c       | c    | c      | c    | c         | c  | c        | c      | c     | c      | c   | c       | c    |          |         |           |         | c        | c         |   |
| g                         | 4949289                 | g                    | 4965518                   | a                | 4917591               | s                 | S88                         | rec36               | g                                    | S88                                   | ++                         | g      | g    | g   | g        | g       | g    | g      | g    | g         | g  | g        | g      | g     | a      | g   | a       |      |          |         |           | g       | g        |           |   |
| g                         | 4949292                 | g                    | 4965521                   | a                | 4917594               | s                 | S88                         | rec36               | g                                    | S88                                   | ++                         | g      | g    | g   | g        | g       | g    | g      | g    | a         | g  | g        | g      | g     | g      | a   | g       | a    |          |         |           |         | g        | g         |   |
| t                         | 4949301                 | t                    | 4965530                   | c                | 4917603               | s                 | S88                         | rec36               | t                                    | S88                                   | ++                         | t      | t    | t   | t        | t       | t    | t      | t    | g         | t  | t        | t      | t     | t      | c   | t       | c    |          |         |           |         | t        | t         |   |
| a                         | 4949376                 | a                    | 4965605                   | g                | 4917678               | s                 | S88                         | rec36               | g                                    | 2                                     | -                          | g      | a    | g   | g        | g       | g    | g      | g    | g         | g  | a        | g      | g     | g      | g   | a       | g    |          |         |           |         | g        | g         |   |
| g                         | 4949403                 | g                    | 4965632                   | a                | 4917705               | s                 | S88                         | rec36               | g                                    | S88                                   | ++                         | g      | g    | g   | g        | a       | g    | a      | g    | a         | g  | a        | a      | a     | a      | a   | a       | g    | a        |         |           |         |          | a         | a |
| g                         | 4949454                 | g                    | 4965683                   | a                | 4917756               | s                 | S88                         | rec36               | g                                    | S88                                   | ++                         | g      | g    | g   | g        | a       | g    | g      | a    | a         | a  | a        | a      | a     | a      | a   | a       | a    |          |         |           |         | a        | a         |   |
| g                         | 4949463                 | g                    | 4965692                   | a                | 4917765               | s                 | S88                         | rec36               | g                                    | S88                                   | ++                         | g      | g    | g   | g        | a       | g    | g      | g    | g         | g  | g        | a      | a     | a      | a   | g       | g    |          |         |           |         | g        | g         |   |
| t                         | 4949475                 | t                    | 4965704                   | c                | 4917777               | s                 | S88                         | rec36               | t                                    | S88                                   | ++                         | t      | t    | t   | t        | c       | t    | c      | c    | c         | c  | c        | c      | c     | c      | c   | c       | c    |          |         |           |         | c        | c         |   |
| c                         | 4949505                 | c                    | 4965734                   | t                | 4917807               | s                 | S88                         | rec36               | c                                    | S88                                   | ++                         | c      | c    | c   | c        | t       | c    | t      | c    | t         | c  | t        | c      | t     | t      | t   | c       | t    | c        |         |           |         |          | c         | c |
| c                         | 4949508                 | c                    | 4965737                   | t                | 4917810               | s                 | S88                         | rec36               | c                                    | S88                                   | ++                         | c      | c    | c   | c        | t       | c    | t      | c    | t         | c  | t        | c      | t     | t      | t   | c       | t    | c        |         |           |         |          | c         | c |
| a                         | 4949550                 | a                    | 4965779                   | g                | 4917852               | s                 | S88                         | rec36               | a                                    | S88                                   | ++                         | a      | a    | a   | a        | a       | a    | g      | g    | a         | g  | a        | a      | a     | a      | a   | a       | a    |          |         |           |         | a        | a         |   |
| t                         | 4949574                 | t                    | 4965803                   | c                | 4917876               | s                 | S88                         | rec36               | t                                    | S88                                   | ++                         | t      | t    | t   | t        | t       | t    | t      | t    | c         | t  | t        | t      | t     | t      | c   | t       | c    |          |         |           |         | c        | c         |   |
| g                         | 4949607                 | g                    | 4965836                   | a                | 4917909               | s                 | S88                         | rec36               | g                                    | S88                                   | ++                         | g      | g    | g   | g        | a       | g    | g      | a    | g         | a  | a        | a      | a     | a      | a   | g       | g    |          |         |           |         | a        | a         |   |
| c                         | 4949676                 | c                    | 4965905                   | t                | 4917978               | s                 | S88                         | rec36               | c                                    | S88                                   | ++++                       | c      | c    | c   | c        | c       | c    | c      | c    | c         | c  | c        | c      | c     | c      | c   | c       | c    |          |         |           |         | c        | c         |   |
| a                         | 4949757                 | a                    | 4965986                   | g                | 4918059               | s                 | S88                         | rec36               | g                                    | 2                                     | -                          | g      | g    | a   | a        | g       | a    | g      | g    | g         | g  | g        | g      | g     | g      | g   | g       | g    |          |         |           |         | g        | g         |   |
| t                         | 4949875                 | t                    | 4966104                   | a                | 4918177               | ns                | S88                         | rec36               | t                                    | S88                                   | ++                         | t      | t    | t   | t        | a       | t    | a      | a    | a         | a  | a        | a      | a     | a      | a   | a       | a    |          |         |           |         | a        | a         |   |
| a                         | 4949949                 | a                    | 4966178                   | g                | 4919806               | nc                | S88                         | rec36               | a                                    | S88                                   | ++                         | a      | a    | a   | a        | g       | a    | a      | a    | c         | g  | a        | c      | c     | c      | c   | c       | g    |          |         |           |         | -        | -         |   |
| t                         | 4949953                 | t                    | 4966182                   | c                | 4919810               | nc                | S88                         | rec36               | t                                    | S88                                   | ++                         | t      | t    | t   | t        | c       | t    | t      | c    | c         | t  | c        | c      | c     | c      | c   | c       | c    |          |         |           |         | -        | -         |   |
| c                         | 4949970                 | c                    | 4966199                   | g                | 4919827               | nc                | S88                         | rec36               | c                                    | S88                                   | ++                         | c      | c    | c   | c        | g       | g    | g      | g    | g         | g  | g        | g      | g     | g      | g   | g       | g    |          |         |           |         | g        | g         |   |
| g                         | 4949972                 | g                    | 4966201                   | a                | 4919829               | nc                | S88                         | rec36               | g                                    | S88                                   | ++                         | g      | g    | g   | g        | a       | g    | g      | a    | g         | a  | g        | g      | g     | g      | g   | g       | g    |          |         |           |         | a        | a         |   |
| a                         | 4949984                 | a                    | 4966213                   | g                | 4919841               | nc                | S88                         | rec36               | a                                    | S88                                   | ++                         | a      | a    | a   | a        | a       | a    | g      | g    | a         | g  | g        | g      | g     | g      | g   | g       | g    |          |         |           |         | g        | g         |   |
| a                         | 4949991                 | a                    | 4966220                   | t                | 4919848               | nc                | S88                         | rec36               | a                                    | S88                                   | ++                         | a      | a    | a   | a        | t       | a    | t      | t    | t         | t  | t        | t      | t     | t      | t   | t       | t    |          |         |           |         | t        | t         |   |
| a                         | 4949995                 | a                    | 4966224                   | g                | 4919852               | nc                | S88                         | rec36               | a                                    | S88                                   | ++                         | a      | a    | a   | a        | g       | a    | g      | g    | g         | g  | g        | g      | g     | g      | g   | g       | g    |          |         |           |         | g        | g         |   |
| t                         | 4950000                 | t                    | 4966229                   | a                | 4919857               | nc                | S88                         | rec36               | t                                    | S88                                   | ++                         | t      | t    | t   | t        | a       | t    | a      | a    | a         | a  | a        | a      | a     | a      | a   | a       |      |          |         |           | a       | a        |           |   |
| c                         | 4950007                 | c                    | 4966236                   | t                | 4919864               | nc                | S88                         | rec36               | c                                    | S88                                   | ++                         | c      | c    | c   | c        | t       | c    | t      | t    | t         | t  | t        | t      | t     | t      | t   | t       |      |          |         |           | t       | t        |           |   |
| a                         | 4950022                 | a                    | 4966251                   | c                | 4919879               | nc                | S88                         | rec36               | a                                    | S88                                   | ++                         | a      | a    | a   | a        | a       | c    | a      | a    | c         | a  | a        | a      | a     | a      | a   | a       | c    |          |         |           |         | a        | a         |   |
| t                         | 4950026                 | t                    | 4966255                   | c                | 4919883               | nc                | S88                         | rec36               | t                                    | S88                                   | ++                         | t      | t    | t   | t        | c       | t    | c      | c    | c         | c  | c        | c      | c     | c      | c   | c       | t    |          |         |           |         | c        | c         |   |
| t                         | 4950069                 | t                    | 4966298                   | c                | 4919926               | s                 | S88                         | rec36               | t                                    | S88                                   | ++                         | t      | c    | t   | t        | c       | t    | c      | c    | c         | c  | c        | c      | c     | c      | c   | c       | c    |          |         |           |         | c        | c         |   |
| g                         | 4950072                 | g                    | 4966301                   | a                | 4919929               | s                 | S88                         | rec36               | g                                    | S88                                   | ++                         | g      | g    | g   | g        | g       | g    | g      | g    | g         | a  | g        | g      | g     | g      | g   | g       | a    |          |         |           |         | g        | g         |   |
| a                         | 4950114                 | a                    | 4966343                   | g                | 4919971               | s                 | S88                         | rec36               | a                                    | S88                                   | ++                         | a      | a    | a   | a        | c       | a    | g      | g    | g         | g  | g        | g      | g     | g      | g   | g       | g    |          |         |           |         | t        | t         |   |
| t                         | 4950118                 | t                    | 4966347                   | c                | 4919975               | ns                | S88                         | rec36               | t                                    | S88                                   | ++                         | t      | t    | t   | t        | c       | t    | c      | c    | c         | c  | c        | c      | c     | c      | c   | c       | c    |          |         |           |         | c        | c         |   |
| t                         | 4950186                 | t                    | 4966415                   | c                | 4920043               | s                 | S88                         | rec36               | t                                    | S88                                   |                            |        |      |     |          |         |      |        |      |           |    |          |        |       |        |     |         |      |          |         |           |         |          |           |   |

Table S8. Allocation of recombinational SNPs to lineages by virtual outgroup analysis<sup>a</sup>

| ExPEC genome site details |                         |                      |                           |                  |                       |                   |                              |                     |                                      | Outgroup Strains Details <sup>1</sup> |                            |        |      |     |          |         |      |        |      |           |    |          |        |       |        |     |         |      |          |         |           |         |          |           |
|---------------------------|-------------------------|----------------------|---------------------------|------------------|-----------------------|-------------------|------------------------------|---------------------|--------------------------------------|---------------------------------------|----------------------------|--------|------|-----|----------|---------|------|--------|------|-----------|----|----------|--------|-------|--------|-----|---------|------|----------|---------|-----------|---------|----------|-----------|
| UT189 <sup>b</sup>        | UTI89 site <sup>c</sup> | APEC 01 <sup>b</sup> | APEC 01 site <sup>c</sup> | S88 <sup>b</sup> | S88 site <sup>c</sup> | type <sup>d</sup> | Event Lineage <sup>e,f</sup> | Recombinant segment | Inferred ancestral base <sup>g</sup> | Outgroup Analysis <sup>g</sup>        | Support level <sup>h</sup> | CFT073 | ED1a | 536 | E2348/69 | SMS 3-5 | IA39 | UMN026 | K-12 | ATCC 8739 | HS | D1 Sd197 | CB9615 | Sakai | EDL933 | IA1 | E24377A | SE11 | SS Sd046 | F2a 301 | F2a 2457T | F5 8401 | B4 Sb227 | B18 BS512 |
| t                         | 4950846                 | t                    | 4967075                   | c                | 4920727               | ns                | S88                          | rec36               | t                                    | S88                                   | ++                         | t      | t    | t   | t        |         | t    | t      | t    | c         | c  | c        | t      | t     | t      |     |         | c    |          |         |           | c       | c        |           |
| t                         | 4950849                 | t                    | 4967078                   | c                | 4920730               | s                 | S88                          | rec36               | t                                    | S88                                   | ++                         | t      | t    | t   | t        |         | t    | t      | t    | t         | t  | c        | t      | c     | t      | t   |         | t    |          |         |           | c       | c        |           |
| t                         | 4950858                 | t                    | 4967087                   | g                | 4920739               | ns                | S88                          | rec36               | t                                    | S88                                   | ++                         | t      | t    | t   | t        |         | g    | g      | g    | g         | g  | g        | g      | g     | g      | g   |         | g    |          |         |           | g       | g        |           |
| t                         | 4950872                 | t                    | 4967101                   | c                | 4920753               | ns                | S88                          | rec36               | t                                    | S88                                   | ++                         | t      | t    | t   | t        |         | c    | c      | c    | c         | c  | c        | c      | c     | c      | c   |         | c    |          |         |           | c       | c        |           |
| a                         | 4950921                 | a                    | 4967150                   | g                | 4920802               | ns                | S88                          | rec36               | a                                    | S88                                   | ++                         | a      | a    | a   | a        |         | g    | g      | g    | g         | g  | g        | g      | g     | g      | g   |         | g    |          |         |           | g       | g        |           |
| g                         | 4950936                 | g                    | 4967165                   | a                | 4920817               | s                 | S88                          | rec36               | g                                    | S88                                   | ++++                       | g      | g    | g   | g        |         | g    | g      | g    | g         | g  | g        | g      | g     | g      | g   |         | g    |          |         |           | g       | g        |           |
| g                         | 4950948                 | g                    | 4967177                   | a                | 4920829               | s                 | S88                          | rec36               | g                                    | S88                                   | ++                         | g      | g    | g   | g        |         | c    | g      | g    | a         | a  | a        | g      | g     | g      | g   |         | a    |          |         |           | a       | a        |           |
| c                         | 4950949                 | c                    | 4967178                   | a                | 4920830               | ns                | S88                          | rec36               | c                                    | S88                                   | ++                         | c      | c    | c   | c        |         | c    | c      | c    | a         | a  | a        | c      | c     | c      | c   |         | a    |          |         |           | a       | a        |           |
| t                         | 4950951                 | t                    | 4967180                   | c                | 4920832               | ns                | S88                          | rec36               | t                                    | S88                                   | ++                         | t      | t    | t   | t        |         | t    | t      | c    | c         | c  | c        | t      | t     | t      | t   |         | c    |          |         |           | c       | c        |           |
| g                         | 4950952                 | g                    | 4967181                   | a                | 4920833               | ns                | S88                          | rec36               | g                                    | S88                                   | ++                         | g      | g    | g   | g        |         | g    | g      | a    | a         | a  | g        | g      | g     | g      | g   |         | a    |          |         |           | a       | a        |           |
| c                         | 4950956                 | c                    | 4967185                   | g                | 4920837               | ns                | S88                          | rec36               | c                                    | S88                                   | ++                         | c      | c    | c   | a        |         | c    | g      | g    | g         | g  | g        | g      | g     | g      | g   |         | g    |          |         |           | g       | g        |           |
| t                         | 4950957                 | t                    | 4967186                   | c                | 4920838               | ns                | S88                          | rec36               | t                                    | S88                                   | ++                         | t      | t    | t   | c        |         | t    | c      | c    | c         | c  | c        | c      | c     | c      | c   |         | c    |          |         |           | c       | c        |           |
| t                         | 4950958                 | t                    | 4967187                   | g                | 4920839               | ns                | S88                          | rec36               | t                                    | S88                                   | ++                         | t      | t    | t   | g        |         | t    | t      | g    | g         | g  | g        | g      | g     | g      | g   |         | g    |          |         |           | g       | g        |           |
| t                         | 4950961                 | t                    | 4967190                   | c                | 4920842               | ns                | S88                          | rec36               | t                                    | S88                                   | ++                         | t      | t    | t   | t        |         | t    | t      | c    | c         | c  | t        | t      | t     | t      | t   |         | c    |          |         |           | c       | c        |           |
| c                         | 4950967                 | c                    | 4967196                   | a                | 4920848               | ns                | S88                          | rec36               | c                                    | S88                                   | ++                         | c      | c    | c   | c        |         | c    | c      | a    | a         | a  | c        | c      | c     | c      | c   |         | a    |          |         |           | a       | a        |           |
| a                         | 4950970                 | a                    | 4967199                   | g                | 4920851               | ns                | S88                          | rec36               | a                                    | S88                                   | ++                         | a      | a    | a   | g        |         | a    | a      | g    | g         | a  | a        | a      | a     | a      | a   |         | g    |          |         |           | g       | g        |           |
| a                         | 4950973                 | a                    | 4967202                   | t                | 4920854               | ns                | S88                          | rec36               | a                                    | S88                                   | ++                         | a      | a    | a   | a        |         | a    | a      | a    | t         | t  | t        | a      | a     | a      | a   |         | t    |          |         |           | g       | t        |           |
| g                         | 4950974                 | g                    | 4967203                   | a                | 4920855               | ns                | S88                          | rec36               | g                                    | S88                                   | ++                         | g      | g    | g   | g        |         | g    | g      | a    | a         | a  | g        | g      | g     | g      | g   |         | a    |          |         |           | a       | t        |           |
| g                         | 4950987                 | g                    | 4967216                   | t                | 4920868               | nc                | S88                          | rec36               | g                                    | S88                                   | ++                         | g      | g    | g   | g        |         | g    | g      | g    | g         | g  | g        | g      | g     | g      | g   |         | a    |          |         |           | a       | c        |           |
| t                         | 4951005                 | t                    | 4967234                   | a                | 4920886               | nc                | S88                          | rec36               | t                                    | S88                                   | ++                         | t      | t    | t   | t        |         | t    | a      | a    | t         | t  | a        | a      | a     | a      | a   |         | t    |          |         |           | t       | a        |           |
| t                         | 4951014                 | t                    | 4967243                   | t                | 4920895               | nc                | S88                          | rec36               | c                                    | S88                                   | ++                         | c      | c    | c   | c        |         | c    | c      | c    | c         | c  | c        | t      | t     | t      | t   |         | c    |          |         |           | c       | c        |           |
| c                         | 4953563                 | c                    | 4969792                   | a                | 4922933               | ns                | S88                          | rec36               | c                                    | S88                                   | ++                         | c      | t    | c   | c        |         | t    | c      | c    | a         | a  | c        | c      | c     | c      | c   |         | t    |          |         |           | t       | t        |           |
| c                         | 4953596                 | c                    | 4969825                   | t                | 4922966               | s                 | S88                          | rec36               | c                                    | S88                                   | ++                         | c      | t    | c   | c        |         | c    | c      | c    | c         | c  | c        | c      | c     | c      | c   |         | c    |          |         |           | c       | c        |           |
| a                         | 4953611                 | a                    | 4969840                   | c                | 4922981               | s                 | S88                          | rec36               | c                                    | 2                                     | -                          | c      | t    | c   | c        |         | c    | c      | c    | t         | t  | t        | c      | c     | c      | c   |         | t    |          |         |           | t       | t        |           |
| t                         | 4953631                 | t                    | 4969860                   | c                | 4923001               | ns                | S88                          | rec36               | t                                    | S88                                   | ++++                       | t      | t    | t   | t        |         | t    | c      | t    | t         | t  | t        | t      | t     | t      | t   |         | t    |          |         |           | t       | t        |           |
| g                         | 4953647                 | g                    | 4969876                   | t                | 4923017               | s                 | S88                          | rec36               | t                                    | 2                                     | -                          | t      | g    | t   | t        |         | t    | g      | t    | t         | g  | t        | t      | t     | t      | t   |         | g    |          |         |           | g       | g        |           |
| t                         | 4953694                 | t                    | 4969923                   | c                | 4923064               | ns                | S88                          | rec36               | c                                    | 2                                     | -                          | c      | t    | c   | c        |         | c    | c      | c    | c         | c  | c        | c      | c     | c      | c   |         | c    |          |         |           | c       | c        |           |
| g                         | 4953696                 | g                    | 4969925                   | a                | 4923066               | ns                | S88                          | rec36               | g                                    | S88                                   | ++                         | a      | g    | g   | g        |         | g    | g      | g    | g         | g  | g        | a      | a     | a      |     | g       |      |          |         | g         | g       |          |           |
| c                         | 4953698                 | c                    | 4969927                   | a                | 4923068               | s                 | S88                          | rec36               | c                                    | S88                                   | ++++                       | c      | a    | c   | c        |         | c    | c      | c    | c         | c  | c        | c      | c     | c      | c   |         | c    |          |         |           | c       | c        |           |
| a                         | 4953704                 | a                    | 4969933                   | g                | 4923074               | s                 | S88                          | rec36               | g                                    | 2                                     | -                          | g      | g    | g   | g        |         | g    | a      | a    | g         | a  | g        | g      | g     | g      | g   |         | g    |          |         |           | g       | g        |           |
| a                         | 4953779                 | a                    | 4970008                   | g                | 4923149               | s                 | S88                          | rec36               | a                                    | S88                                   | ++                         | a      | a    | a   | a        |         | a    | a      | a    | a         | a  | a        | a      | a     | a      | a   |         | a    |          |         |           | a       | a        |           |
| a                         | 4953788                 | a                    | 4970017                   | g                | 4923158               | s                 | S88                          | rec36               | a                                    | S88                                   | ++++                       | a      | a    | a   | a        |         | a    | a      | a    | a         | a  | a        | a      | a     | a      | a   |         | a    |          |         |           | a       | a        |           |
| c                         | 4953815                 | c                    | 4970044                   | a                | 4923185               | s                 | S88                          | rec36               | c                                    | S88                                   | ++++                       | c      | c    | c   | c        |         | c    | c      | c    | c         | c  | c        | c      | c     | c      | c   |         | c    |          |         |           | c       | c        |           |
| g                         | 4953818                 | g                    | 4970047                   | a                | 4923188               | s                 | S88                          | rec36               | g                                    | S88                                   | ++++                       | g      | g    | g   | g        |         | g    | g      | g    | g         | g  | g        | g      | g     | g      | g   |         | g    |          |         |           | g       | g        |           |
| c                         | 4953829                 | c                    | 4970058                   | g                | 4923199               | ns                | S88                          | rec36               | c                                    | S88                                   | ++++                       | c      | g    | c   | c        |         | c    | c      | c    | c         | c  | c        | c      | c     | c      | c   |         | c    |          |         |           | c       | c        |           |
| t                         | 4953930                 | t                    | 4970159                   | c                | 4923300               | nc                | S88                          | rec36               | c                                    | 2                                     | -                          | c      | c    | c   | c        |         | c    | c      | c    | c         | c  | c        | c      | c     | c      | c   |         | c    |          |         |           | c       | c        |           |
| c                         | 4953965                 | c                    | 4970194                   | t                | 4923335               | nc                | S88                          | rec36               | c                                    | S88                                   | ++                         | c      | c    | c   | c        |         | c    | c      | c    | t         | t  | c        | t      | t     | t      | t   |         | c    |          |         |           | c       | c        |           |
| a                         | 4953966                 | a                    | 4970195                   | g                | 4923336               | nc                | S88                          | rec36               | a                                    | S88                                   | ++                         | a      | a    | a   | a        |         | a    | a      | a    | g         | g  | a        | g      | g     | g      | g   |         | a    |          |         |           | a       | a        |           |
| a                         | 4953970                 | a                    | 4970199                   | g                | 4923340               | nc                | S88                          | rec36               | a                                    | S88                                   | ++++                       | a      | a    | a   | a        |         | a    | a      | a    | a         | a  | a        | a      | a     | a      | a   |         | a    |          |         |           | a       | a        |           |
| c                         | 4961924                 | c                    | 4978153                   | a                | 4931867               | s                 | S88                          | rec36               | a                                    | 2                                     | -                          | a      | a    | a   | c        |         | c    | c      | c    | c         | c  | c        | c      | c     | c      | c   |         | c    |          |         |           | c       | c        |           |
| c                         | 4961944                 | c                    | 4978173                   | t                | 4931887               | ns                | S88                          | rec36               | c                                    | S88                                   | ++++                       | c      | c    | c   | c        |         | c    | c      | c    | c         | c  | c        | c      | c     | c      | c   |         | c    |          |         |           | c       | c        |           |
| c                         | 4961978                 | c                    | 4978207                   | g                | 4931921               | s                 | S88                          | rec36               | c                                    | S88                                   | ++                         | c      | c    | c   | c        |         | c    | c      | c    | c         | c  | c        | c      | c     | c      | c   |         | t    |          |         |           | t       | c        |           |
| c                         | 4962005                 | c                    | 4978234                   | t                | 4931948               | s                 | S88                          | rec36               | c                                    | S88                                   | ++                         | c      | c    | c   | c        |         | t    | c      | c    | c         | c  | c        | c      | c     | c      | c   |         | c    |          |         |           | c       | c        |           |
| g                         | 4962209                 | g                    | 4978438                   | a                | 4932152               | s                 | S88                          | rec36               | g                                    | S88                                   | ++                         | g      | g    | g   | g        |         | a    | a      | a    | g         | a  | a        | a      | a     | a      | a   |         | a    |          |         |           | a       | g        |           |
| a                         | 4962224                 | a                    | 4978453                   | g                | 4932167               | s                 | S88                          | rec36               | a                                    | S88                                   | ++                         | a      | a    | a   | g        |         | a    | g      | g    | a         | g  | g        | g      | g     | g      | g   |         | g    |          |         |           | g       | g        |           |
| t                         | 4962230                 | t                    | 4978459                   | c                | 4932173               | s                 | S88                          | rec36               | t                                    | S88                                   | ++                         | t      | t    | t   | t        |         | c    | t      | c    | c         | t  | c        | c      | c     | c      | c   |         | c    |          |         |           | c       | c        |           |
| c                         | 4962233                 | c                    | 4978462                   | t                | 4932176               | s                 | S88                          | rec36               | c                                    | S88                                   | ++                         | c      | c    | c   | c        |         | t    | c      | t    | c         | t  | t        | t      | t     | t      | t   |         | t    |          |         |           | t       | t        |           |
| g                         | 4962302                 | g                    | 4978531                   | a                | 4932245               | s                 | S88                          | rec36               | g                                    | S88                                   | ++++                       | g      | g    | g   | g        |         | g    | g      | g    | g         | g  | g        | g      | g     | g      | g   |         | g    |          |         |           | g       | g        |           |
| a                         | 4962329                 | a                    | 4978558                   | g                | 4932272               | s                 | S88                          | rec36               | a                                    | S88                                   | ++                         | a      | a    | a   | a        |         | a    | g      | a    | a         | a  | a        | a      | a     | a      | a   |         | a    |          |         |           | g       | g        |           |
| t                         | 4962365                 | t                    | 4978594                   | c                | 4932308               | s                 | S88                          | rec36               | t                                    | S88                                   | ++                         | t      | t    | t   | t        |         | t    | t      | t    | t         | c  | t        | t      | t     | t      | t   |         | t    |          |         |           | c       | c        |           |
| g                         | 4962369                 | g                    | 4978598                   | a                | 4932312               | ns                | S88                          | rec36               | g                                    | S88                                   | ++++                       | g      | g    | g   | g        |         | g    | g      | g    | g         | g  | g        | g      | g     | g      | g   |         | g    |          |         |           | g       | g        |           |
| g                         | 4962410                 | g                    | 4978639                   | a                | 4932353               | s                 | S88                          | rec36               | g                                    | S88                                   | ++++                       | g      | g    | g   | g        |         | g    | g      | g    | g         | g  | g        | g      | g     | g      | g   |         | g    |          |         |           | g       | g        |           |
| a                         | 4962419                 | a                    | 4978648                   | c                | 4932362               | s                 | S88                          | rec36               | a                                    | S88                                   | ++                         | a      | a    | a   | a        |         | a    | a      | a    | a         | c  | a        | a      | a     | a      | a   |         | a    |          |         |           | a       | a        |           |
| a                         | 4962506                 | a                    | 4978735                   | g                | 4932449               | s                 | S88                          | rec36               | a                                    | S88                                   | ++                         | a      | a    | a   | a        |         | a    | a      | a    | a         | g  | a        | a      | a     | a      | a   |         | g    |          |         |           | g       | g        |           |
| g                         | 4962566                 | g                    | 4978795                   | a                | 4932509               | s                 | S88                          | rec36               | g                                    | S88                                   | ++++                       | g      | g    | g   | g        |         | g    | g      | g    | g         | g  | g        | g      | g     | g      | g   |         | g    |          |         |           | g       | g        |           |
| a                         | 4962620                 | a                    | 4978849                   | g                | 4932563               | s                 | S88                          | rec36               | g                                    | 2                                     | -                          | a      | g    | a   | a        |         | a    | a      | a    | a         | a  | a        | a      | a     | a      | a   |         | a    |          |         |           | a       | a        |           |
| g                         | 4962638                 | g                    | 4978867                   | c                | 4932581               | s                 | S88                          | rec36               | c                                    | 2                                     | -                          | g      | c    | c   | g        |         | c    | c      | c    | c         | t  | c        |        |       |        |     |         |      |          |         |           |         |          |           |

Page 37

Table S8. Allocation of recombinational SNPs to lineages by virtual outgroup analysis<sup>a</sup>

| ExPEC genome site details |                         |                      |                           |                  |                       |                   |                             |                     |                                      | Outgroup Strains Details <sup>1</sup> |                            |        |      |     |          |         |      |        |      |           |    |          |        |       |        |     |         |      |          |         |           |         |          |           |   |   |
|---------------------------|-------------------------|----------------------|---------------------------|------------------|-----------------------|-------------------|-----------------------------|---------------------|--------------------------------------|---------------------------------------|----------------------------|--------|------|-----|----------|---------|------|--------|------|-----------|----|----------|--------|-------|--------|-----|---------|------|----------|---------|-----------|---------|----------|-----------|---|---|
| UT189 <sup>b</sup>        | UT189 site <sup>c</sup> | APEC 01 <sup>b</sup> | APEC 01 site <sup>c</sup> | S88 <sup>b</sup> | S88 site <sup>c</sup> | type <sup>d</sup> | Event Lineage <sup>ef</sup> | Recombinant segment | Inferred ancestral base <sup>g</sup> | Outgroup Analysis <sup>g</sup>        | Support level <sup>h</sup> | CFT073 | ED1a | 536 | E2348/69 | SMS 3-5 | IA39 | UMN026 | K-12 | ATCC 8739 | HS | D1 Sd197 | CB9615 | Sakai | EDL933 | IA1 | E24377A | SE11 | SS Sd046 | F2a 301 | F2a 2457T | F5 8401 | B4 Sd227 | B18 BS512 |   |   |
| a                         | 4973012                 | a                    | 4989241                   | g                | 4939189               | s                 | S88                         | rec36               | a                                    | S88                                   | ++                         | a      | a    | a   | a        | g       | a    | g      | g    | g         | g  | g        | g      | g     | g      | g   | g       | g    | g        | g       | g         | g       | g        | g         |   |   |
| c                         | 4973016                 | c                    | 4989245                   | t                | 4939193               | ns                | S88                         | rec36               | c                                    | S88                                   | ++                         | c      | c    | c   | c        | c       | t    | c      | t    | t         | r  | t        | r      | t     | t      | t   | t       | t    | t        | t       | t         | t       | t        | t         |   |   |
| g                         | 4973021                 | g                    | 4989250                   | a                | 4939198               | s                 | S88                         | rec36               | g                                    | S88                                   | ++                         | g      | g    | g   | g        | a       | g    | a      | a    | a         | a  | a        | a      | a     | a      | a   | a       | a    | a        | a       | a         | a       | a        | a         |   |   |
| a                         | 4973026                 | a                    | 4989255                   | g                | 4939203               | s                 | S88                         | rec36               | g                                    | 2                                     | -                          | g      | g    | g   | g        | a       | g    | g      | g    | g         | g  | g        | g      | g     | g      | g   | g       | g    | g        | g       | g         | g       | g        | g         |   |   |
| g                         | 4973028                 | g                    | 4989257                   | a                | 4939205               | ns                | S88                         | rec36               | g                                    | S88                                   | ++                         | g      | g    | g   | g        | a       | g    | a      | a    | a         | a  | a        | a      | a     | a      | a   | a       | a    | a        | a       | a         | a       | a        | a         |   |   |
| t                         | 4973029                 | t                    | 4989258                   | g                | 4939206               | ns                | S88                         | rec36               | t                                    | S88                                   | ++                         | t      | t    | t   | t        | g       | t    | g      | g    | g         | g  | g        | g      | g     | g      | g   | g       | g    | g        | g       | g         | g       | g        | g         |   |   |
| t                         | 4973032                 | t                    | 4989261                   | g                | 4939209               | s                 | S88                         | rec36               | g                                    | 2                                     | -                          | g      | g    | g   | g        | a       | g    | a      | a    | a         | a  | a        | a      | a     | a      | a   | a       | a    | a        | a       | a         | a       | a        | a         |   |   |
| g                         | 4973033                 | g                    | 4989262                   | a                | 4939210               | s                 | S88                         | rec36               | g                                    | S88                                   | ++                         | g      | g    | g   | g        | a       | g    | a      | a    | a         | a  | a        | a      | a     | a      | a   | a       | a    | a        | a       | a         | a       | a        | a         | a |   |
| a                         | 4973062                 | a                    | 4989291                   | g                | 4939239               | s                 | S88                         | rec36               | g                                    | 2                                     | -                          | g      | g    | g   | a        | g       | g    | g      | g    | g         | g  | g        | g      | g     | g      | g   | g       | g    | g        | g       | g         | g       | g        | g         | g |   |
| a                         | 4973069                 | a                    | 4989298                   | g                | 4939246               | s                 | S88                         | rec36               | a                                    | S88                                   | ++                         | a      | a    | a   | a        | g       | a    | g      | g    | g         | g  | g        | g      | g     | g      | g   | g       | g    | g        | g       | g         | g       | g        | g         | g |   |
| g                         | 4973072                 | g                    | 4989301                   | a                | 4939249               | s                 | S88                         | rec36               | g                                    | S88                                   | ++                         | g      | g    | g   | g        | a       | g    | a      | a    | a         | a  | a        | a      | a     | a      | a   | a       | a    | a        | a       | a         | a       | a        | a         | a |   |
| c                         | 4973077                 | c                    | 4989306                   | g                | 4939254               | ns                | S88                         | rec36               | c                                    | S88                                   | ++                         | c      | c    | c   | c        | g       | c    | g      | g    | g         | g  | g        | g      | g     | g      | g   | g       | g    | g        | g       | g         | g       | g        | g         | g |   |
| g                         | 4973081                 | g                    | 4989310                   | a                | 4939258               | s                 | S88                         | rec36               | g                                    | S88                                   | ++                         | g      | g    | g   | g        | a       | g    | a      | a    | a         | a  | a        | a      | a     | a      | a   | a       | a    | a        | a       | a         | a       | a        | a         | a |   |
| a                         | 4973084                 | a                    | 4989313                   | c                | 4939261               | s                 | S88                         | rec36               | a                                    | S88                                   | ++                         | a      | a    | a   | a        | c       | a    | c      | c    | c         | c  | c        | c      | c     | c      | c   | c       | c    | c        | c       | c         | c       | c        | c         | c |   |
| t                         | 4973099                 | t                    | 4989328                   | c                | 4939276               | s                 | S88                         | rec36               | t                                    | S88                                   | ++                         | t      | t    | t   | t        | c       | t    | c      | c    | c         | c  | c        | c      | c     | c      | c   | c       | c    | c        | c       | c         | c       | c        | c         | c |   |
| c                         | 4973102                 | c                    | 4989331                   | a                | 4939279               | s                 | S88                         | rec36               | c                                    | S88                                   | ++                         | c      | c    | c   | c        | a       | c    | a      | a    | a         | a  | a        | a      | a     | a      | a   | a       | a    | a        | a       | a         | a       | a        | a         | a |   |
| g                         | 4973105                 | g                    | 4989334                   | t                | 4939282               | s                 | S88                         | rec36               | g                                    | S88                                   | ++                         | g      | g    | g   | g        | t       | g    | t      | t    | t         | t  | t        | t      | t     | t      | t   | t       | t    | t        | t       | t         | t       | t        | t         | t |   |
| c                         | 4973165                 | c                    | 4989394                   | c                | 4939342               | s                 | S88                         | rec36               | c                                    | S88                                   | ++                         | c      | c    | c   | c        | t       | c    | t      | t    | t         | t  | t        | t      | t     | t      | t   | t       | t    | t        | t       | t         | t       | t        | t         | t |   |
| t                         | 4973180                 | t                    | 4989409                   | c                | 4939357               | s                 | S88                         | rec36               | t                                    | S88                                   | ++                         | t      | t    | t   | t        | c       | t    | c      | c    | c         | c  | c        | c      | c     | c      | c   | c       | c    | c        | c       | c         | c       | c        | c         | c |   |
| t                         | 4973198                 | t                    | 4989427                   | g                | 4939375               | ns                | S88                         | rec36               | t                                    | S88                                   | ++                         | t      | t    | t   | t        | t       | t    | t      | t    | t         | t  | t        | t      | t     | t      | t   | t       | t    | t        | t       | t         | t       | t        | t         | t |   |
| a                         | 4973216                 | a                    | 4989445                   | g                | 4939393               | s                 | S88                         | rec36               | a                                    | S88                                   | ++                         | a      | a    | a   | a        | g       | a    | g      | g    | g         | g  | g        | g      | g     | g      | g   | g       | g    | g        | g       | g         | g       | g        | g         | g | g |
| c                         | 4973225                 | c                    | 4989454                   | t                | 4939402               | s                 | S88                         | rec36               | c                                    | S88                                   | ++                         | c      | c    | c   | c        | t       | c    | t      | t    | t         | t  | t        | t      | t     | t      | t   | t       | t    | t        | t       | t         | t       | t        | t         | t |   |
| g                         | 4973239                 | g                    | 4989468                   | t                | 4939416               | s                 | S88                         | rec36               | g                                    | S88                                   | ++                         | g      | g    | g   | g        | t       | g    | t      | t    | t         | t  | t        | t      | t     | t      | t   | t       | t    | t        | t       | t         | t       | t        | t         | t |   |
| c                         | 4973243                 | c                    | 4989472                   | t                | 4939420               | s                 | S88                         | rec36               | c                                    | S88                                   | ++                         | c      | c    | c   | c        | a       | c    | t      | t    | a         | a  | a        | a      | a     | a      | a   | a       | a    | a        | a       | a         | a       | a        | a         | a |   |
| t                         | 4973246                 | t                    | 4989475                   | a                | 4939423               | s                 | S88                         | rec36               | t                                    | S88                                   | ++                         | t      | t    | t   | t        | c       | t    | a      | a    | c         | c  | c        | c      | c     | c      | c   | c       | c    | c        | c       | c         | c       | c        | c         | c |   |
| a                         | 4973252                 | a                    | 4989481                   | g                | 4939429               | s                 | S88                         | rec36               | a                                    | S88                                   | ++                         | a      | a    | a   | a        | g       | a    | g      | g    | g         | g  | g        | g      | g     | g      | g   | g       | g    | g        | g       | g         | g       | g        | g         | g | g |
| g                         | 4973258                 | g                    | 4989487                   | a                | 4939435               | ns                | S88                         | rec36               | g                                    | S88                                   | ++                         | g      | g    | g   | g        | a       | g    | a      | a    | a         | a  | a        | a      | a     | a      | a   | a       | a    | a        | a       | a         | a       | a        | a         | a | a |
| t                         | 4973260                 | t                    | 4989489                   | c                | 4939437               | ns                | S88                         | rec36               | t                                    | S88                                   | ++                         | t      | t    | t   | t        | c       | t    | c      | c    | c         | c  | c        | c      | c     | c      | c   | c       | c    | c        | c       | c         | c       | c        | c         | c |   |
| t                         | 4973261                 | t                    | 4989490                   | c                | 4939438               | s                 | S88                         | rec36               | t                                    | S88                                   | ++                         | t      | t    | t   | t        | c       | t    | c      | c    | c         | c  | c        | c      | c     | c      | c   | c       | c    | c        | c       | c         | c       | c        | c         | c |   |
| c                         | 4973264                 | c                    | 4989493                   | g                | 4939441               | s                 | S88                         | rec36               | c                                    | S88                                   | ++                         | c      | c    | c   | c        | g       | c    | g      | g    | g         | g  | g        | g      | g     | g      | g   | g       | g    | g        | g       | g         | g       | g        | g         | g | g |
| t                         | 4973267                 | t                    | 4989496                   | c                | 4939444               | s                 | S88                         | rec36               | t                                    | S88                                   | ++                         | t      | t    | t   | t        | c       | t    | c      | c    | c         | c  | c        | c      | c     | c      | c   | c       | c    | c        | c       | c         | c       | c        | c         | c |   |
| c                         | 4973270                 | c                    | 4989499                   | a                | 4939447               | s                 | S88                         | rec36               | c                                    | S88                                   | ++                         | c      | c    | c   | c        | c       | c    | a      | a    | a         | a  | a        | a      | a     | a      | a   | a       | a    | a        | a       | a         | a       | a        | a         | a |   |
| c                         | 4973276                 | c                    | 4989505                   | t                | 4939453               | s                 | S88                         | rec36               | c                                    | S88                                   | ++                         | c      | c    | c   | c        | t       | c    | t      | t    | t         | t  | t        | t      | t     | t      | t   | t       | t    | t        | t       | t         | t       | t        | t         | t |   |
| a                         | 4973279                 | a                    | 4989508                   | c                | 4939456               | s                 | S88                         | rec36               | a                                    | S88                                   | ++                         | a      | a    | a   | a        | c       | a    | c      | c    | c         | c  | c        | c      | c     | c      | c   | c       | c    | c        | c       | c         | c       | c        | c         | c |   |
| g                         | 4973285                 | g                    | 4989514                   | a                | 4939462               | s                 | S88                         | rec36               | g                                    | S88                                   | ++                         | g      | g    | g   | g        | a       | g    | a      | a    | a         | a  | a        | a      | a     | a      | a   | a       | a    | a        | a       | a         | a       | a        | a         | a |   |
| g                         | 4973291                 | g                    | 4989520                   | c                | 4939468               | ns                | S88                         | rec36               | g                                    | S88                                   | ++                         | g      | g    | g   | g        | a       | g    | a      | c    | a         | a  | a        | a      | a     | a      | a   | a       | a    | a        | a       | a         | a       | a        | a         | a |   |
| c                         | 4973292                 | c                    | 4989521                   | g                | 4939469               | ns                | S88                         | rec36               | c                                    | S88                                   | ++                         | c      | c    | c   | c        | g       | c    | g      | g    | g         | g  | g        | g      | g     | g      | g   | g       | g    | g        | g       | g         | g       | g        | g         | g | g |
| t                         | 4973297                 | t                    | 4989526                   | c                | 4939474               | s                 | S88                         | rec36               | t                                    | S88                                   | ++                         | t      | t    | t   | t        | c       | t    | c      | c    | c         | c  | c        | c      | c     | c      | c   | c       | c    | c        | c       | c         | c       | c        | c         | c |   |
| g                         | 4973300                 | g                    | 4989529                   | t                | 4939477               | ns                | S88                         | rec36               | g                                    | S88                                   | ++                         | g      | g    | g   | g        | a       | g    | a      | t    | t         | a  | t        | t      | t     | a      | t   | t       | a    | a        | a       | a         | a       | a        | a         | a |   |
| c                         | 4973302                 | c                    | 4989531                   | g                | 4939479               | ns                | S88                         | rec36               | c                                    | S88                                   | ++                         | c      | c    | c   | c        | g       | c    | g      | g    | g         | g  | g        | g      | g     | g      | g   | g       | g    | g        | g       | g         | g       | g        | g         | g | g |
| a                         | 4973316                 | a                    | 4989545                   | t                | 4939493               | ns                | S88                         | rec36               | a                                    | S88                                   | ++                         | a      | a    | a   | a        | a       | t    | a      | t    | t         | t  | t        | t      | t     | t      | t   | t       | t    | t        | t       | t         | t       | t        | t         | t |   |
| a                         | 4973321                 | a                    | 4989550                   | t                | 4939498               | s                 | S88                         | rec36               | a                                    | S88                                   | ++                         | a      | a    | a   | a        | a       | t    | a      | t    | t         | t  | t        | t      | t     | t      | t   | t       | t    | t        | t       | t         | t       | t        | t         | t |   |
| g                         | 4973327                 | g                    | 4989556                   | c                | 4939504               | s                 | S88                         | rec36               | g                                    | S88                                   | ++                         | g      | g    | g   | g        | c       | g    | c      | c    | c         | c  | c        | c      | c     | c      | c   | c       | c    | c        | c       | c         | c       | c        | c         | c |   |
| t                         | 4973336                 | t                    | 4989565                   | a                | 4939513               | s                 | S88                         | rec36               | t                                    | S88                                   | ++                         | t      | t    | t   | t        | a       | t    | a      | a    | a         | a  | a        | a      | a     | a      | a   | a       | a    | a        | a       | a         | a       | a        | a         | a |   |
| t                         | 4973851                 | t                    | 4990080                   | a                | 4940028               | s                 | S88                         | rec36               | t                                    | S88                                   | ++                         | t      | t    | t   | t        | a       | t    | a      | a    | a         | a  | a        | a      | a     | a      | a   | a       | a    | a        | a       | a         | a       | a        | a         | a |   |
| a                         | 4973860                 | a                    | 4990089                   | g                | 4940037               | s                 | S88                         | rec36               | a                                    | S88                                   | ++                         | a      | a    | a   | a        | g       | a    | g      | g    | g         | g  | g        | g      | g     | g      | g   | g       | g    | g        | g       | g         | g       | g        | g         | g | g |
| a                         | 4973861                 | a                    | 4990090                   | t                | 4940038               | ns                | S88                         | rec36               | a                                    | S88                                   | ++                         | a      | a    | a   | a        | a       | t    | a      | t    | t         | t  | t        | t      | t     | t      | t   | t       | t    | t        | t       | t         | t       | t        | t         | t |   |
| a                         | 4973881                 | a                    | 4990110                   | c                | 4940058               | s                 | S88                         | rec36               | a                                    | S88                                   | ++                         | a      | a    | a   | a        | c       | a    | c      | c    | c         | c  | c        | c      | c     | c      | c   | c       | c    | c        | c       | c         | c       | c        | c         | c |   |
| c                         | 4973898                 | c                    | 4990127                   | g                | 4940075               | ns                | S88                         | rec36               | c                                    | S88                                   | ++                         | c      | c    | c   | c        | g       | c    | g      | g    | g         | g  | g        | g      | g     | g      | g   | g       | g    | g        | g       | g         | g       | g        | g         | g |   |
| g                         | 4973899                 | g                    | 4990128                   | t                | 4940076               | ns                | S88                         | rec36               | g                                    | S88                                   | ++                         | g      | g    | g   | g        | t       | g    | t      | t    | t         | t  | t        | t      | t     | t      | t   | t       | t    | t        | t       | t         | t       | t        | t         | t |   |
| c                         | 4973902                 | c                    | 4990131                   | a                | 4940079               | s                 | S88                         | rec36               | c                                    | S88                                   | ++                         | c      | c    | c   | c        | a       | c    | a      | a    | a         | a  | a        | a      | a     | a      | a   | a       | a    | a        | a       | a         | a       | a        | a         | a |   |
| g                         | 4973908                 | g                    | 4990137                   | a                | 4940085               | s                 | S88                         | rec36               | g                                    | S88                                   | ++                         | g      | g    | g   | g        | a       | g    | a      | a    | a         | a  | a        | a      | a     | a      | a   | a       | a    | a        | a       | a         | a       | a        | a         | a |   |
| c                         | 4973929                 | c                    | 4990158                   | t                | 4940106               | s                 | S88                         | rec36               | c                                    | S88                                   | ++                         | c      | c    | c   | c        | t       | c    | t      | t    | g         | t  |          |        |       |        |     |         |      |          |         |           |         |          |           |   |   |



Page 40

Table S8. Allocation of recombinational SNPs to lineages by virtual outgroup analysis<sup>6</sup>

| ExPEC genome site details |                         |                      |                           |                  |                       |                   |                             |                     |                                      | Outgroup Strains Details <sup>1</sup> |                            |        |      |     |          |         |      |        |      |           |    |          |        |       |        |     |         |      |          |         |           |         |          |           |
|---------------------------|-------------------------|----------------------|---------------------------|------------------|-----------------------|-------------------|-----------------------------|---------------------|--------------------------------------|---------------------------------------|----------------------------|--------|------|-----|----------|---------|------|--------|------|-----------|----|----------|--------|-------|--------|-----|---------|------|----------|---------|-----------|---------|----------|-----------|
| UT189 <sup>b</sup>        | UTI89 site <sup>c</sup> | APEC 01 <sup>b</sup> | APEC 01 site <sup>c</sup> | S88 <sup>b</sup> | S88 site <sup>c</sup> | type <sup>d</sup> | Event Lineage <sup>ef</sup> | Recombinant segment | Inferred ancestral base <sup>g</sup> | Outgroup Analysis <sup>g</sup>        | Support level <sup>h</sup> | CFT073 | ED1a | 536 | E2348/69 | SMS 3-5 | IA39 | UMN026 | K-12 | ATCC 8739 | HS | D1 Sd197 | CB9615 | Sakai | EDL933 | IA1 | E24377A | SE11 | SS Sd046 | F2a 301 | F2a 2457T | F5 8401 | B4 Sd227 | B18 BS512 |
| c                         | 4981200                 | c                    | 4997429                   | t                | 4947373               | nc                | S88                         | rec36               | c                                    | S88                                   | ++                         | c      | c    | c   | t        | t       | c    | c      | c    | c         | c  | c        | c      | c     | c      | c   | c       | c    | c        | c       | c         | c       | c        | c         |
| t                         | 4981202                 | t                    | 4997431                   | c                | 4947375               | nc                | S88                         | rec36               | t                                    | S88                                   | ++                         | t      | t    | c   | c        | c       | c    | c      | c    | c         | c  | c        | c      | c     | c      | c   | c       | c    | c        | c       | c         | c       | c        | c         |
| g                         | 4981218                 | g                    | 4997447                   | a                | 4947391               | nc                | S88                         | rec36               | g                                    | S88                                   | ++                         | g      | g    | g   | a        | a       | a    | a      | a    | a         | a  | a        | a      | a     | a      | a   | a       | a    | a        | a       | a         | a       | a        | a         |
| g                         | 4981423                 | g                    | 4997652                   | a                | 4947596               | s                 | S88                         | rec36               | g                                    | S88                                   | ++                         | g      | g    | g   | a        | a       | a    | a      | a    | a         | a  | a        | a      | a     | a      | a   | a       | a    | a        | a       | a         | a       | a        | a         |
| c                         | 4981450                 | c                    | 4997679                   | t                | 4947623               | s                 | S88                         | rec36               | c                                    | S88                                   | ++                         | c      | c    | c   | t        | t       | c    | c      | c    | c         | c  | c        | c      | c     | c      | c   | c       | c    | c        | c       | c         | c       | c        | c         |
| g                         | 4981459                 | g                    | 4997688                   | a                | 4947632               | s                 | S88                         | rec36               | g                                    | S88                                   | ++                         | g      | g    | g   | a        | a       | a    | a      | a    | a         | a  | a        | a      | a     | a      | a   | a       | a    | a        | a       | a         | a       | a        | a         |
| c                         | 4981468                 | c                    | 4997697                   | t                | 4947641               | s                 | S88                         | rec36               | c                                    | S88                                   | ++                         | c      | t    | c   | t        | t       | c    | t      | t    | t         | t  | t        | t      | t     | t      | t   | t       | t    | t        | t       | t         | t       | t        | t         |
| t                         | 4981544                 | t                    | 4997773                   | c                | 4947717               | s                 | S88                         | rec36               | t                                    | S88                                   | ++                         | t      | c    | t   | c        | c       | t    | c      | c    | t         | t  | c        | c      | c     | c      | c   | c       | c    | c        | c       | c         | c       | c        | c         |
| t                         | 4981631                 | t                    | 4997860                   | g                | 4947804               | ns                | S88                         | rec36               | t                                    | S88                                   | ++                         | t      | g    | t   | g        | g       | g    | g      | g    | g         | g  | g        | g      | g     | g      | g   | g       | g    | g        | g       | g         | g       | g        | g         |
| t                         | 4981660                 | t                    | 4997889                   | c                | 4947833               | s                 | S88                         | rec36               | t                                    | S88                                   | ++                         | t      | c    | t   | t        | t       | t    | c      | t    | c         | t  | t        | t      | t     | t      | t   | t       | t    | t        | t       | t         | t       | t        | t         |
| t                         | 4981801                 | t                    | 4998030                   | c                | 4947974               | s                 | S88                         | rec36               | t                                    | S88                                   | ++                         | t      | t    | t   | c        | c       | t    | c      | c    | c         | c  | c        | c      | c     | c      | c   | c       | c    | c        | c       | c         | c       | c        | c         |
| c                         | 4981990                 | c                    | 4998219                   | a                | 4948163               | ns                | S88                         | rec36               | a                                    | 2                                     | -                          | a      | a    | a   | a        | a       | a    | a      | a    | a         | a  | a        | a      | a     | a      | a   | a       | a    | a        | a       | a         | a       | a        | a         |
| a                         | 4982025                 | a                    | 4998254                   | g                | 4948198               | s                 | S88                         | rec36               | a                                    | S88                                   | ++                         | a      | g    | a   | g        | a       | g    | g      | g    | g         | g  | g        | g      | g     | g      | g   | g       | g    | g        | g       | g         | g       | g        | g         |
| a                         | 4982100                 | a                    | 4998329                   | g                | 4948273               | s                 | S88                         | rec36               | a                                    | S88                                   | ++                         | a      | g    | a   | g        | a       | g    | g      | g    | g         | g  | g        | g      | g     | g      | g   | g       | g    | g        | g       | g         | g       | g        | g         |
| c                         | 4982135                 | c                    | 4998364                   | a                | 4948308               | ns                | S88                         | rec36               | c                                    | S88                                   | ++                         | c      | c    | c   | a        | c       | c    | a      | a    | a         | a  | a        | a      | a     | a      | a   | a       | a    | a        | a       | a         | a       | a        | a         |
| c                         | 4982154                 | c                    | 4998383                   | t                | 4948327               | s                 | S88                         | rec36               | c                                    | S88                                   | ++                         | c      | c    | c   | t        | c       | c    | t      | t    | t         | c  | t        | t      | t     | t      | t   | t       | t    | t        | t       | t         | t       | t        | t         |
| t                         | 4982346                 | t                    | 4998575                   | c                | 4948519               | s                 | S88                         | rec36               | t                                    | S88                                   | ++                         | t      | t    | t   | c        | t       | t    | c      | c    | c         | c  | c        | c      | c     | c      | c   | c       | c    | c        | c       | c         | c       | c        | c         |
| t                         | 4982472                 | t                    | 4998701                   | c                | 4948645               | s                 | S88                         | rec36               | c                                    | 2                                     | -                          | c      | c    | c   | c        | c       | c    | c      | c    | c         | c  | c        | c      | c     | c      | c   | c       | c    | c        | c       | c         | c       | c        | c         |
| t                         | 4982529                 | t                    | 4998758                   | c                | 4948702               | s                 | S88                         | rec36               | t                                    | S88                                   | ++                         | t      | t    | t   | t        | t       | t    | c      | t    | c         | c  | c        | c      | c     | c      | c   | c       | c    | c        | c       | c         | c       | c        | c         |
| t                         | 4982601                 | t                    | 4998830                   | c                | 4948774               | s                 | S88                         | rec36               | t                                    | S88                                   | ++                         | t      | t    | t   | t        | c       | c    | c      | c    | c         | c  | c        | c      | c     | c      | c   | c       | c    | c        | c       | c         | c       | c        | c         |
| t                         | 4982732                 | t                    | 4998961                   | c                | 4948905               | s                 | S88                         | rec36               | t                                    | S88                                   | ++                         | t      | t    | t   | c        | c       | t    | c      | c    | c         | c  | c        | c      | c     | c      | c   | c       | c    | c        | c       | c         | c       | c        | c         |
| c                         | 4982735                 | c                    | 4998964                   | t                | 4948908               | s                 | S88                         | rec36               | c                                    | S88                                   | ++                         | c      | c    | c   | t        | t       | c    | t      | t    | t         | t  | c        | c      | c     | c      | c   | c       | c    | c        | c       | c         | c       | c        | c         |
| g                         | 4982769                 | g                    | 4998998                   | t                | 4948942               | ns                | S88                         | rec36               | g                                    | S88                                   | ++                         | g      | g    | g   | t        | g       | t    | t      | t    | t         | g  | g        | g      | g     | g      | g   | g       | g    | g        | g       | g         | g       | g        | g         |
| a                         | 4982771                 | a                    | 4999000                   | c                | 4948944               | s                 | S88                         | rec36               | a                                    | S88                                   | ++                         | a      | a    | a   | c        | c       | a    | c      | c    | c         | a  | a        | a      | a     | a      | a   | a       | a    | a        | a       | a         | a       | a        | a         |
| a                         | 4982774                 | a                    | 4999003                   | g                | 4948947               | s                 | S88                         | rec36               | a                                    | S88                                   | ++                         | a      | a    | a   | g        | g       | a    | g      | g    | g         | g  | a        | a      | a     | a      | a   | a       | a    | a        | a       | a         | a       | a        | a         |
| a                         | 4982800                 | a                    | 4999029                   | g                | 4948973               | ns                | S88                         | rec36               | a                                    | S88                                   | ++                         | a      | a    | a   | g        | a       | g    | g      | g    | g         | g  | g        | g      | g     | g      | g   | g       | g    | g        | g       | g         | g       | g        | g         |
| c                         | 4982816                 | c                    | 4999045                   | a                | 4948989               | s                 | S88                         | rec36               | c                                    | S88                                   | ++                         | c      | c    | c   | c        | c       | c    | a      | c    | c         | c  | c        | c      | c     | c      | c   | c       | c    | c        | c       | c         | c       | c        | c         |
| c                         | 4982819                 | c                    | 4999048                   | a                | 4948992               | s                 | S88                         | rec36               | c                                    | S88                                   | ++                         | c      | c    | c   | c        | c       | c    | a      | c    | c         | c  | c        | c      | c     | c      | c   | c       | c    | c        | c       | c         | c       | c        | c         |
| c                         | 4982834                 | c                    | 4999063                   | t                | 4949007               | s                 | S88                         | rec36               | c                                    | S88                                   | ++                         | c      | c    | c   | t        | c       | c    | c      | t    | c         | t  | c        | t      | t     | t      | t   | t       | t    | t        | t       | t         | t       | t        | t         |
| t                         | 4982837                 | t                    | 4999066                   | c                | 4949010               | s                 | S88                         | rec36               | t                                    | S88                                   | ++                         | t      | t    | t   | c        | c       | t    | t      | c    | c         | c  | c        | c      | c     | c      | c   | c       | c    | c        | c       | c         | c       | c        | c         |
| c                         | 4982849                 | c                    | 4999078                   | g                | 4949022               | s                 | S88                         | rec36               | c                                    | S88                                   | ++                         | c      | c    | c   | g        | c       | c    | g      | c    | g         | g  | a        | a      | a     | a      | a   | a       | a    | a        | a       | a         | a       | a        | a         |
| g                         | 4982879                 | g                    | 4999108                   | a                | 4949052               | s                 | S88                         | rec36               | g                                    | S88                                   | ++                         | g      | g    | g   | g        | a       | g    | g      | a    | a         | a  | a        | a      | a     | a      | a   | a       | a    | a        | a       | a         | a       | a        | a         |
| a                         | 4982900                 | a                    | 4999129                   | g                | 4949073               | s                 | S88                         | rec36               | a                                    | S88                                   | ++                         | a      | a    | a   | a        | g       | a    | g      | g    | g         | g  | g        | g      | g     | g      | g   | g       | g    | g        | g       | g         | g       | g        | g         |
| c                         | 4982909                 | c                    | 4999138                   | g                | 4949082               | s                 | S88                         | rec36               | c                                    | S88                                   | ++                         | c      | c    | c   | c        | c       | c    | g      | g    | g         | g  | g        | g      | g     | g      | g   | g       | g    | g        | g       | g         | g       | g        | g         |
| t                         | 4982912                 | t                    | 4999141                   | c                | 4949085               | s                 | S88                         | rec36               | t                                    | S88                                   | ++                         | t      | t    | t   | t        | c       | t    | c      | c    | c         | c  | c        | c      | c     | c      | c   | c       | c    | c        | c       | c         | c       | c        | c         |
| c                         | 4982924                 | c                    | 4999153                   | t                | 4949097               | s                 | S88                         | rec36               | c                                    | 2                                     | -                          | c      | c    | c   | c        | c       | c    | c      | c    | c         | c  | c        | c      | c     | c      | c   | c       | c    | c        | c       | c         | c       | c        | c         |
| g                         | 4982929                 | g                    | 4999158                   | c                | 4949102               | ns                | S88                         | rec36               | c                                    | S88                                   | ++                         | c      | c    | c   | c        | c       | c    | c      | c    | c         | c  | c        | c      | c     | c      | c   | c       | c    | c        | c       | c         | c       | c        | c         |
| c                         | 4982969                 | c                    | 4999198                   | a                | 4949142               | ns                | S88                         | rec36               | c                                    | S88                                   | ++                         | c      | c    | c   | c        | c       | c    | a      | c    | c         | c  | c        | c      | c     | c      | c   | c       | c    | c        | c       | c         | c       | c        | c         |
| a                         | 4982985                 | a                    | 4999214                   | g                | 4949158               | ns                | S88                         | rec36               | a                                    | S88                                   | ++                         | a      | a    | a   | a        | g       | a    | g      | g    | g         | g  | g        | g      | g     | g      | g   | g       | g    | g        | g       | g         | g       | g        | g         |
| g                         | 4983030                 | g                    | 4999259                   | a                | 4949203               | ns                | S88                         | rec36               | g                                    | S88                                   | ++                         | g      | g    | g   | g        | g       | g    | a      | g    | g         | g  | g        | g      | g     | g      | g   | g       | g    | g        | g       | g         | g       | g        | g         |
| a                         | 4983054                 | a                    | 4999283                   | g                | 4949227               | ns                | S88                         | rec36               | a                                    | S88                                   | ++                         | a      | a    | a   | a        | a       | a    | g      | g    | g         | a  | g        | g      | g     | g      | g   | g       | g    | g        | g       | g         | g       | g        | g         |
| g                         | 4983056                 | g                    | 4999285                   | a                | 4949229               | s                 | S88                         | rec36               | g                                    | S88                                   | ++                         | g      | g    | g   | g        | g       | g    | a      | a    | a         | a  | a        | a      | a     | a      | a   | a       | a    | a        | a       | a         | a       | a        | a         |
| c                         | 4983061                 | c                    | 4999290                   | a                | 4949234               | ns                | S88                         | rec36               | c                                    | S88                                   | ++                         | c      | c    | c   | c        | a       | c    | a      | a    | a         | a  | a        | a      | a     | a      | a   | a       | a    | a        | a       | a         | a       | a        | a         |
| t                         | 4983086                 | t                    | 4999315                   | c                | 4949259               | s                 | S88                         | rec36               | t                                    | S88                                   | ++                         | t      | t    | t   | t        | t       | t    | c      | c    | c         | t  | t        | t      | c     | c      | c   | c       | c    | c        | c       | c         | c       | c        | c         |
| a                         | 4983095                 | a                    | 4999324                   | c                | 4949268               | s                 | S88                         | rec36               | a                                    | S88                                   | ++                         | a      | a    | a   | a        | c       | a    | c      | c    | c         | c  | c        | c      | c     | c      | c   | c       | c    | c        | c       | c         | c       | c        | c         |
| c                         | 4983101                 | c                    | 4999330                   | t                | 4949274               | s                 | S88                         | rec36               | c                                    | S88                                   | ++                         | c      | c    | c   | c        | c       | c    | c      | t    | t         | t  | c        | t      | t     | t      | t   | t       | t    | t        | t       | t         | t       | t        | t         |
| t                         | 4983122                 | t                    | 4999351                   | c                | 4949295               | s                 | S88                         | rec36               | t                                    | S88                                   | ++                         | t      | t    | t   | t        | c       | t    | c      | c    | c         | c  | c        | c      | c     | c      | c   | c       | c    | c        | c       | c         | c       | c        | c         |
| c                         | 4983146                 | c                    | 4999375                   | t                | 4949319               | s                 | S88                         | rec36               | c                                    | S88                                   | ++                         | c      | c    | c   | c        | t       | c    | c      | t    | t         | c  | t        | t      | t     | t      | t   | t       | t    | t        | t       | t         | t       | t        | t         |
| c                         | 4983152                 | c                    | 4999381                   | t                | 4949325               | s                 | S88                         | rec36               | c                                    | S88                                   | ++                         | c      | c    | c   | c        | t       | c    | t      | t    | t         | c  | t        | t      | t     | t      | t   | t       | t    | t        | t       | t         | t       | t        | t         |
| a                         | 4983161                 | a                    | 4999390                   | c                | 4949334               | s                 | S88                         | rec36               | c                                    | 2                                     | -                          | c      | a    | c   | c        | c       | c    | c      | c    | c         | c  | c        | c      | c     | c      | c   | c       | c    | c        | c       | c         | c       | c        | c         |
| t                         | 4983173                 | t                    | 4999402                   | c                | 4949346               | s                 | S88                         | rec36               | t                                    | S88                                   | ++                         | t      | t    | t   | t        | c       | t    | c      | c    | c         | c  | c        | c      | c     | c      | c   | c       | c    | c        | c       | c         | c       | c        | c         |
| a                         | 4983187                 | a                    | 4999416                   | t                | 4949360               | ns                | S88                         | rec36               | a                                    | S88                                   | ++                         | a      | a    | a   | a        | a       | a    | t      | t    | t         | a  | t        | t      | t     | t      | t   | t       | t    | t        | t       | t         | t       | t        | t         |
| a                         | 4983188                 | a                    | 4999417                   | c                | 4949361               | s                 | S88                         | rec36               | a                                    | S88                                   | ++                         | a      | a    | a   | a        | a       | a    | c      | t    | t         | a  | t        | t      | t     | t      | t   | t       | t    | t        | t       | t         | t       | t        | t         |
| g                         | 4983200                 | g                    | 4999429                   | a                | 4949373               | s                 | S88                         | rec36               | g                                    | S88                                   | ++                         | g      | g    | g   | g        | a       | g    | a      | a    | a         | a  | a        | a      | a     | a      | a   | a       | a    | a        | a       | a         | a       | a        | a         |
| g                         | 4983224                 | g                    | 4999453                   |                  |                       |                   |                             |                     |                                      |                                       |                            |        |      |     |          |         |      |        |      |           |    |          |        |       |        |     |         |      |          |         |           |         |          |           |

Table S8. Allocation of recombinational SNPs to lineages by virtual outgroup analysis<sup>a</sup>

| ExPEC genome site details |                         |                      |                           |                  |                       |                   |                             |                     |                                      | Outgroup Strains Details <sup>1</sup> |                            |        |      |     |          |         |      |        |      |           |    |          |        |       |        |     |         |      |          |         |           |         |          |           |   |   |
|---------------------------|-------------------------|----------------------|---------------------------|------------------|-----------------------|-------------------|-----------------------------|---------------------|--------------------------------------|---------------------------------------|----------------------------|--------|------|-----|----------|---------|------|--------|------|-----------|----|----------|--------|-------|--------|-----|---------|------|----------|---------|-----------|---------|----------|-----------|---|---|
| UT189 <sup>b</sup>        | UT189 site <sup>c</sup> | APEC 01 <sup>b</sup> | APEC 01 site <sup>c</sup> | S88 <sup>b</sup> | S88 site <sup>c</sup> | type <sup>d</sup> | Event Lineage <sup>ef</sup> | Recombinant segment | Inferred ancestral base <sup>g</sup> | Outgroup Analysis <sup>h</sup>        | Support level <sup>h</sup> | CFT073 | ED1a | 536 | E2348/69 | SMS 3-5 | IA39 | UMN026 | K-12 | ATCC 8739 | HS | D1 Sd197 | CB9615 | Sakai | EDL933 | IA1 | E24377A | SE11 | SS Sd046 | F2a 301 | F2a 2457T | F5 8401 | B4 Sd227 | B18 BS512 |   |   |
| t                         | 4983811                 | t                    | 5000040                   | a                | 4949984               | nc                | S88                         | rec36               | t                                    | S88                                   | ++                         | t      | t    | t   | t        | t       | t    | t      | a    | a         | a  | a        | a      | a     | a      | a   | a       | a    | a        | c       | c         | c       | a        | a         | a |   |
| a                         | 4983815                 | a                    | 5000044                   | t                | 4949988               | nc                | S88                         | rec36               | a                                    | S88                                   | ++                         | a      | a    | a   | a        | a       | a    | a      | t    | t         | t  | t        | a      | a     | a      | a   | a       | a    | a        | c       | c         | c       | a        | a         | a |   |
| g                         | 4983818                 | g                    | 5000047                   | a                | 4949991               | nc                | S88                         | rec36               | g                                    | S88                                   | ++                         | g      | g    | g   | g        | g       | g    | g      | a    | a         | a  | a        | g      | g     | g      | g   | a       | a    | a        | g       | g         | g       | a        | a         | a |   |
| t                         | 4983819                 | t                    | 5000048                   | g                | 4949992               | nc                | S88                         | rec36               | t                                    | S88                                   | ++                         | t      | t    | t   | t        | g       | t    | g      | g    | g         | g  | g        | g      | g     | g      | g   | g       | g    | g        | g       | g         | g       | g        | g         | g |   |
| c                         | 4983822                 | c                    | 5000051                   | a                | 4949995               | nc                | S88                         | rec36               | a                                    | 2                                     | -                          | c      | a    | a   | a        | a       | c    | a      | a    | a         | a  | a        | a      | a     | a      | a   | a       | a    | a        | a       | a         | a       | a        | a         | a |   |
| g                         | 4983825                 | g                    | 5000054                   | a                | 4949998               | nc                | S88                         | rec36               | g                                    | S88                                   | ++                         | g      | g    | g   | g        | a       | g    | a      | a    | a         | a  | a        | a      | a     | a      | a   | a       | a    | a        | a       | a         | a       | a        | a         | a |   |
| a                         | 4983834                 | a                    | 5000063                   | g                | 4950007               | nc                | S88                         | rec36               | a                                    | S88                                   | ++                         | a      | a    | a   | a        | a       | a    | a      | g    | g         | g  | g        | g      | g     | g      | g   | g       | g    | g        | g       | g         | g       | g        | g         | g |   |
| a                         | 4984279                 | a                    | 5000509                   | g                | 4950452               | ns                | S88                         | rec36               | a                                    | S88                                   | ++                         | a      | a    | g   | g        | g       | a    | g      | g    | g         | g  | g        | g      | g     | g      | g   | g       | g    | g        | g       | g         | g       | g        | g         | g |   |
| c                         | 4984311                 | c                    | 5000541                   | a                | 4950561               | ns                | S88                         | rec36               | c                                    | S88                                   | ++                         | c      | c    | c   | a        | a       | c    | a      | a    | a         | a  | a        | c      | c     | a      | a   | a       | a    | a        | a       | a         | a       | a        | a         | a |   |
| a                         | 4984316                 | a                    | 5000546                   | g                | 4950566               | ns                | S88                         | rec36               | a                                    | S88                                   | ++                         | a      | a    | g   | g        | g       | a    | g      | g    | g         | g  | g        | -      | -     | g      | g   | g       | g    | g        | g       | g         | g       | g        | g         | g |   |
| g                         | 4984327                 | g                    | 5000557                   | t                | 4950577               | ns                | S88                         | rec36               | g                                    | S88                                   | ++                         | g      | g    | g   | t        | t       | g    | t      | t    | t         | t  | g        | t      | t     | t      | t   | t       | t    | t        | t       | t         | t       | t        | t         | t |   |
| t                         | 4984328                 | t                    | 5000558                   | c                | 4950578               | ns                | S88                         | rec36               | t                                    | S88                                   | ++                         | t      | t    | t   | c        | c       | t    | c      | c    | c         | c  | c        | c      | c     | c      | c   | c       | c    | c        | c       | c         | c       | c        | c         | t | t |
| g                         | 4984350                 | g                    | 5000580                   | t                | 4950600               | ns                | S88                         | rec36               | g                                    | S88                                   | ++                         | g      | g    | g   | g        | g       | g    | g      | t    | t         | t  | g        | t      | t     | t      | t   | t       | t    | t        | g       | g         | g       | t        | g         | g |   |
| c                         | 4984370                 | c                    | 5000600                   | a                | 4950611               | nc                | S88                         | rec36               | c                                    | S88                                   | ++                         | c      | c    | c   | c        | c       | c    | c      | a    | a         | a  | a        | a      | a     | a      | a   | a       | a    | a        | c       | c         | c       | c        | c         | c |   |
| c                         | 4984372                 | c                    | 5000602                   | t                | 4950613               | s                 | S88                         | rec36               | c                                    | S88                                   | ++                         | c      | c    | c   | c        | c       | c    | t      | t    | t         | t  | c        | t      | t     | t      | t   | t       | t    | t        | c       | c         | c       | t        | t         | t |   |
| g                         | 4984425                 | g                    | 5000655                   | t                | 4950666               | s                 | S88                         | rec36               | g                                    | S88                                   | ++                         | g      | g    | g   | g        | g       | g    | g      | t    | g         | g  | g        | t      | t     | t      | g   | g       | g    | g        | g       | g         | g       | g        | g         | g | g |
| a                         | 4984443                 | a                    | 5000673                   | g                | 4950684               | s                 | S88                         | rec36               | g                                    | 2                                     | -                          | g      | g    | g   | g        | g       | g    | g      | a    | a         | a  | g        | g      | g     | g      | g   | g       | g    | g        | a       | a         | a       | a        | a         | a | a |
| g                         | 4984476                 | g                    | 5000706                   | a                | 4950717               | s                 | S88                         | rec36               | g                                    | S88                                   | ++                         | g      | g    | g   | g        | g       | g    | g      | a    | g         | g  | a        | a      | a     | a      | a   | a       | a    | a        | a       | a         | a       | a        | a         | a | a |
| a                         | 4984508                 | a                    | 5000738                   | g                | 4950749               | s                 | S88                         | rec36               | a                                    | S88                                   | ++                         | a      | a    | a   | g        | g       | g    | g      | g    | g         | g  | g        | g      | g     | g      | g   | g       | g    | g        | g       | g         | g       | g        | g         | g | g |
| g                         | 4984521                 | g                    | 5000751                   | a                | 4950762               | s                 | S88                         | rec36               | g                                    | S88                                   | ++                         | g      | g    | a   | a        | a       | a    | a      | a    | a         | a  | a        | a      | a     | a      | a   | a       | a    | a        | a       | a         | a       | a        | a         | a | a |
| c                         | 4984524                 | c                    | 5000754                   | a                | 4950765               | s                 | S88                         | rec36               | c                                    | S88                                   | ++                         | c      | c    | c   | a        | a       | a    | a      | a    | a         | a  | a        | a      | a     | a      | a   | a       | a    | a        | a       | a         | a       | a        | a         | a | a |
| g                         | 4984539                 | g                    | 5000769                   | a                | 4950780               | s                 | S88                         | rec36               | g                                    | S88                                   | ++                         | g      | g    | g   | g        | g       | g    | g      | a    | g         | g  | g        | a      | a     | a      | a   | a       | a    | a        | a       | a         | a       | a        | a         | a | a |
| g                         | 4984560                 | g                    | 5000790                   | c                | 4950801               | s                 | S88                         | rec36               | g                                    | S88                                   | ++                         | c      | g    | c   | c        | c       | c    | c      | c    | c         | c  | c        | c      | c     | c      | c   | c       | c    | c        | c       | c         | c       | c        | c         | c |   |
| t                         | 4984608                 | t                    | 5000838                   | g                | 4950849               | s                 | S88                         | rec36               | t                                    | S88                                   | ++                         | t      | t    | g   | g        | g       | t    | g      | g    | g         | g  | g        | g      | g     | g      | g   | g       | g    | g        | g       | g         | g       | g        | g         | g | g |
| g                         | 4984620                 | g                    | 5000850                   | a                | 4950861               | s                 | S88                         | rec36               | g                                    | S88                                   | ++                         | g      | g    | a   | a        | a       | a    | g      | a    | a         | a  | a        | a      | a     | a      | a   | a       | a    | a        | a       | a         | a       | a        | a         | a | a |
| t                         | 4984679                 | t                    | 5000909                   | c                | 4950920               | ns                | S88                         | rec36               | t                                    | S88                                   | ++                         | c      | t    | t   | c        | c       | c    | c      | c    | c         | c  | c        | c      | c     | c      | c   | c       | c    | c        | c       | c         | c       | c        | c         | c |   |
| t                         | 4984710                 | t                    | 5000940                   | c                | 4950951               | s                 | S88                         | rec36               | t                                    | S88                                   | ++                         | t      | t    | t   | t        | t       | t    | t      | c    | t         | t  | t        | t      | t     | t      | t   | t       | t    | t        | t       | c         | c       | c        | t         | t |   |
| t                         | 4984713                 | t                    | 5000943                   | g                | 4950954               | s                 | S88                         | rec36               | t                                    | S88                                   | ++                         | t      | t    | t   | c        | c       | t    | c      | g    | c         | c  | c        | c      | c     | c      | c   | c       | c    | c        | c       | c         | c       | c        | c         | c | c |
| a                         | 4984719                 | a                    | 5000949                   | g                | 4950960               | s                 | S88                         | rec36               | a                                    | S88                                   | ++                         | g      | a    | a   | g        | a       | a    | g      | g    | g         | g  | g        | g      | g     | g      | g   | g       | g    | g        | g       | g         | g       | g        | g         | g | g |
| a                         | 4984725                 | a                    | 5000955                   | g                | 4950966               | s                 | S88                         | rec36               | a                                    | S88                                   | ++                         | g      | a    | a   | g        | a       | a    | g      | g    | g         | g  | g        | g      | g     | g      | g   | g       | g    | g        | g       | g         | g       | g        | g         | g | g |
| g                         | 4984730                 | g                    | 5000960                   | a                | 4950971               | s                 | S88                         | rec36               | g                                    | S88                                   | ++                         | g      | g    | g   | g        | a       | g    | g      | a    | a         | a  | a        | a      | a     | a      | a   | a       | a    | a        | a       | a         | a       | a        | a         | a | a |
| a                         | 4984731                 | a                    | 5000961                   | g                | 4950972               | s                 | S88                         | rec36               | a                                    | S88                                   | ++                         | a      | a    | a   | a        | c       | a    | a      | g    | g         | g  | a        | g      | g     | g      | g   | g       | g    | g        | g       | g         | g       | g        | g         | g | g |
| g                         | 4984737                 | g                    | 5000967                   | a                | 4950978               | s                 | S88                         | rec36               | g                                    | S88                                   | ++                         | a      | g    | g   | a        | a       | g    | a      | a    | a         | a  | a        | a      | a     | a      | a   | a       | a    | a        | a       | a         | a       | a        | a         | a | a |
| g                         | 4984740                 | g                    | 5000970                   | a                | 4950981               | s                 | S88                         | rec36               | g                                    | S88                                   | ++                         | a      | g    | g   | a        | a       | g    | a      | a    | a         | a  | a        | a      | a     | a      | a   | a       | a    | a        | a       | a         | a       | a        | a         | a | a |
| c                         | 4984743                 | c                    | 5000973                   | t                | 4950984               | s                 | S88                         | rec36               | c                                    | S88                                   | ++                         | t      | c    | c   | t        | c       | c    | t      | t    | t         | t  | t        | t      | t     | t      | t   | t       | t    | t        | t       | t         | t       | t        | t         | t | t |
| t                         | 4984749                 | t                    | 5000979                   | c                | 4950990               | s                 | S88                         | rec36               | t                                    | S88                                   | ++                         | c      | t    | t   | t        | t       | t    | t      | c    | c         | c  | c        | c      | c     | c      | c   | c       | c    | c        | c       | c         | c       | c        | c         | c | c |
| a                         | 4984764                 | a                    | 5000994                   | g                | 4951005               | s                 | S88                         | rec36               | a                                    | S88                                   | ++                         | g      | a    | g   | a        | g       | a    | g      | g    | g         | g  | a        | g      | g     | g      | g   | g       | g    | g        | g       | g         | g       | g        | g         | g | g |
| g                         | 4984770                 | g                    | 5001000                   | t                | 4951011               | s                 | S88                         | rec36               | g                                    | S88                                   | ++                         | c      | g    | a   | c        | c       | g    | a      | t    | t         | t  | g        | c      | c     | c      | t   | t       | t    | t        | t       | t         | t       | t        | t         | t | t |
| t                         | 4984779                 | t                    | 5001009                   | g                | 4951020               | s                 | S88                         | rec36               | g                                    | 2                                     | -                          | g      | g    | t   | g        | g       | t    | g      | g    | a         | c  | g        | g      | g     | g      | c   | c       | c    | a        | a       | a         | a       | c        | c         | c | c |
| g                         | 4984788                 | g                    | 5001018                   | a                | 4951029               | s                 | S88                         | rec36               | g                                    | S88                                   | ++                         | a      | g    | g   | a        | a       | g    | a      | a    | a         | a  | a        | a      | a     | a      | a   | a       | a    | a        | a       | a         | a       | a        | a         | a | a |
| t                         | 4984821                 | t                    | 5001051                   | c                | 4951062               | s                 | S88                         | rec36               | t                                    | S88                                   | ++                         | t      | t    | t   | c        | c       | t    | c      | c    | c         | c  | c        | c      | c     | c      | c   | c       | c    | c        | c       | c         | c       | c        | c         | c | c |
| g                         | 4984829                 | g                    | 5001059                   | a                | 4951070               | s                 | S88                         | rec36               | g                                    | S88                                   | ++                         | g      | g    | g   | a        | a       | g    | a      | a    | a         | a  | a        | a      | a     | a      | a   | a       | a    | a        | a       | a         | a       | a        | a         | a | a |
| a                         | 4984848                 | a                    | 5001078                   | g                | 4951089               | s                 | S88                         | rec36               | a                                    | S88                                   | ++                         | a      | a    | a   | g        | a       | a    | g      | g    | g         | g  | g        | g      | g     | g      | g   | g       | g    | g        | g       | g         | g       | g        | g         | g | g |
| g                         | 4984851                 | g                    | 5001081                   | a                | 4951092               | s                 | S88                         | rec36               | g                                    | S88                                   | ++                         | g      | g    | g   | a        | a       | g    | a      | a    | a         | a  | a        | a      | a     | a      | a   | a       | a    | a        | a       | a         | a       | a        | a         | a | a |
| c                         | 4984884                 | c                    | 5001114                   | a                | 4951125               | s                 | S88                         | rec36               | c                                    | S88                                   | ++                         | c      | c    | c   | a        | a       | c    | a      | a    | a         | a  | a        | a      | a     | a      | a   | a       | a    | a        | a       | a         | a       | a        | a         | a | a |
| t                         | 4984890                 | t                    | 5001120                   | c                | 4951131               | s                 | S88                         | rec36               | c                                    | 2                                     | -                          | t      | c    | c   | c        | c       | c    | c      | c    | c         | c  | c        | c      | c     | c      | c   | c       | c    | c        | c       | c         | c       | c        | c         | c | c |
| a                         | 4984904                 | a                    | 5001134                   | g                | 4951145               | s                 | S88                         | rec36               | a                                    | S88                                   | ++                         | a      | a    | a   | g        | a       | a    | g      | g    | g         | g  | g        | g      | g     | g      | g   | g       | g    | g        | g       | g         | g       | g        | g         | g | g |
| a                         | 4984935                 | a                    | 5001165                   | c                | 4951176               | ns                | S88                         | rec36               | a                                    | S88                                   | ++                         | a      | a    | a   | c        | a       | a    | c      | a    | a         | a  | a        | a      | a     | a      | a   | a       | a    | a        | a       | a         | a       | a        | a         | a | a |
| t                         | 4984937                 | t                    | 5001167                   | c                | 4951178               | ns                | S88                         | rec36               | t                                    | S88                                   | ++                         | t      | t    | t   | c        | t       | c    | c      | c    | c         | c  | c        | c      | c     | c      | c   | c       | c    | c        | c       | c         | c       | c        | c         | c | c |
| g                         | 4984938                 | g                    | 5001168                   | c                | 4951179               | s                 | S88                         | rec36               | g                                    | S88                                   | ++                         | g      | g    | g   | g        | g       | g    | g      | c    | g         | g  | g        | g      | g     | g      | g   | g       | g    | g        | g       | g         | g       | g        | g         | g | g |
| c                         | 4984956                 | c                    | 5001186                   | t                | 4951197               | s                 | S88                         | rec36               | c                                    | S88                                   | ++                         | c      | c    | c   | t        | c       | t    | t      | t    | t         | t  | t        | t      | t     | t      | t   | t       | t    | t        | t       | t         | t       | t        | t         | t | t |
| g                         | 4984983                 | g                    | 5001213                   | a                | 4951224               | s</               |                             |                     |                                      |                                       |                            |        |      |     |          |         |      |        |      |           |    |          |        |       |        |     |         |      |          |         |           |         |          |           |   |   |

Table S8. Allocation of recombinational SNPs to lineages by virtual outgroup analysis<sup>a</sup>

| ExPEC genome site details |                         |                      |                           |                  |                       |                   |                             |                     |                                      | Outgroup Strains Details <sup>1</sup> |                            |        |      |     |          |         |      |        |      |           |    |          |        |       |        |     |         |      |          |         |           |         |          |           |   |   |
|---------------------------|-------------------------|----------------------|---------------------------|------------------|-----------------------|-------------------|-----------------------------|---------------------|--------------------------------------|---------------------------------------|----------------------------|--------|------|-----|----------|---------|------|--------|------|-----------|----|----------|--------|-------|--------|-----|---------|------|----------|---------|-----------|---------|----------|-----------|---|---|
| UTI89 <sup>b</sup>        | UTI89 site <sup>c</sup> | APEC 01 <sup>b</sup> | APEC 01 site <sup>c</sup> | S86 <sup>b</sup> | S86 site <sup>c</sup> | type <sup>d</sup> | Event Lineage <sup>ef</sup> | Recombinant segment | Inferred ancestral base <sup>g</sup> | Outgroup Analysis <sup>h</sup>        | Support level <sup>h</sup> | CFT073 | ED1a | 536 | E2348/69 | SMS 3-5 | IA39 | UMN026 | K-12 | ATCC 8739 | HS | D1 Sd197 | CB9615 | Sakai | EDL933 | IA1 | E24377A | SE11 | SS Ss046 | F2a 301 | F2a 2457T | F5 8401 | B4 Sb227 | B18 BS512 |   |   |
| c                         | 5000807                 | t                    | 5015493                   | t                | 4965504               | s                 | UTI89/AS                    | rec38               | c                                    | AS                                    | ++                         | c      |      |     |          |         |      |        |      |           |    |          |        |       |        |     |         |      |          |         |           |         |          |           |   |   |
| t                         | 5000831                 | c                    | 5015517                   | c                | 4965528               | s                 | UTI89/AS                    | rec38               | t                                    | AS                                    | ++                         | t      |      |     |          |         |      |        |      |           |    |          |        |       |        |     |         |      |          |         |           |         |          |           |   |   |
| a                         | 5000861                 | g                    | 5015547                   | g                | 4965558               | s                 | UTI89/AS                    | rec38               | a                                    | AS                                    | ++                         | a      |      |     |          |         |      |        |      |           |    |          |        |       |        |     |         |      |          |         |           |         |          |           |   |   |
| a                         | 5000863                 | g                    | 5015549                   | g                | 4965560               | ns                | UTI89/AS                    | rec38               | g                                    | UTI89                                 | ++                         | g      |      |     |          |         |      |        |      |           |    |          |        |       |        |     |         |      |          |         |           |         |          |           |   |   |
| a                         | 5000987                 | c                    | 5015673                   | c                | 4965684               | s                 | UTI89/AS                    | rec38               | c                                    | UTI89                                 | +++                        | c      |      |     |          |         |      |        |      |           |    |          |        |       |        |     |         |      |          |         |           |         |          |           |   |   |
| t                         | 5001005                 | g                    | 5015691                   | g                | 4965702               | s                 | UTI89/AS                    | rec38               | g                                    | UTI89                                 | +++                        | g      |      |     |          |         |      |        |      |           |    |          |        |       |        |     |         |      |          |         |           |         |          | c         |   |   |
| t                         | 5001026                 | c                    | 5015712                   | c                | 4965723               | s                 | UTI89/AS                    | rec38               | t                                    | AS                                    | +                          | t      |      |     |          |         |      |        |      |           |    |          |        |       |        |     |         |      |          |         |           |         |          | g         |   |   |
|                           |                         |                      |                           |                  |                       |                   |                             |                     |                                      |                                       |                            |        |      |     |          |         |      |        |      |           |    |          |        |       |        |     |         |      |          |         |           |         |          | c         |   |   |
| t                         | 5001040                 | c                    | 5015726                   | c                | 4965737               | ns                | UTI89/AS                    | rec38               | c                                    | UTI89                                 | +++                        | c      |      |     |          |         |      |        |      |           |    |          |        |       |        |     |         |      |          |         |           |         |          | c         |   |   |
| g                         | 5001059                 | a                    | 5015745                   | a                | 4965756               | s                 | UTI89/AS                    | rec38               | g                                    | AS                                    | ++                         | g      |      |     |          |         |      |        |      |           |    |          |        |       |        |     |         |      |          |         |           |         |          | a         |   |   |
| t                         | 5001122                 | c                    | 5015808                   | c                | 4965819               | s                 | UTI89/AS                    | rec38               | ?                                    | U/AS                                  | +/-                        | c      | t    |     |          |         |      |        |      |           |    |          |        |       |        |     |         |      |          |         |           |         |          | c         |   |   |
| t                         | 5001152                 | c                    | 5015838                   | c                | 4965849               | s                 | UTI89/AS                    | rec38               | ?                                    | U/AS                                  | +/-                        | t      | c    |     |          |         |      |        |      |           |    |          |        |       |        |     |         |      |          |         |           |         |          | t         |   |   |
| c                         | 5001221                 | t                    | 5015908                   | t                | 4965918               | s                 | UTI89/AS                    | rec38               | t                                    | UTI89                                 | +                          | t      | t    |     |          |         |      |        |      |           |    |          |        |       |        |     |         |      |          |         |           |         |          | c         |   |   |
| g                         | 5001224                 | a                    | 5015911                   | a                | 4965921               | s                 | UTI89/AS                    | rec38               | ?                                    | U/AS                                  | +/-                        | a      | g    |     |          |         |      |        |      |           |    |          |        |       |        |     |         |      |          |         |           |         |          | g         |   |   |
| c                         | 5001226                 | a                    | 5015913                   | a                | 4965923               | ns                | UTI89/AS                    | rec38               | ?                                    | U/AS                                  | +/-                        | a      | c    |     |          |         |      |        |      |           |    |          |        |       |        |     |         |      |          |         |           |         |          | c         |   |   |
| t                         | 5001227                 | c                    | 5015914                   | c                | 4965924               | ns                | UTI89/AS                    | rec38               | c                                    | UTI89                                 | +                          | c      | a    |     |          |         |      |        |      |           |    |          |        |       |        |     |         |      |          |         |           |         |          | t         |   |   |
| c                         | 5001239                 | t                    | 5015926                   | t                | 4965936               | s                 | UTI89/AS                    | rec38               | ?                                    | U/AS                                  | +/-                        | t      | c    |     |          |         |      |        |      |           |    |          |        |       |        |     |         |      |          |         |           |         |          | c         |   |   |
| a                         | 5001254                 | t                    | 5015941                   | t                | 4965951               | s                 | UTI89/AS                    | rec38               | a                                    | AS                                    | +                          | a      | g    |     |          |         |      |        |      |           |    |          |        |       |        |     |         |      |          |         |           |         |          |           | g |   |
| a                         | 5001271                 | g                    | 5015958                   | g                | 4965968               | ns                | UTI89/AS                    | rec38               | a                                    | AS                                    | +++                        | a      | a    |     |          |         |      |        |      |           |    |          |        |       |        |     |         |      |          |         |           |         |          |           | a |   |
|                           |                         |                      |                           |                  |                       |                   |                             |                     |                                      |                                       |                            |        |      |     |          |         |      |        |      |           |    |          |        |       |        |     |         |      |          |         |           |         |          |           |   |   |
| a                         | 5001293                 | g                    | 5015980                   | g                | 4965990               | s                 | UTI89/AS                    | rec38               | g                                    | UTI89                                 | +++                        | g      | g    |     |          |         |      |        |      |           |    |          |        |       |        |     |         |      |          |         |           |         |          |           | g |   |
| c                         | 5001319                 | t                    | 5016006                   | t                | 4966016               | ns                | UTI89/AS                    | rec38               | ?                                    | U/AS                                  | +/-                        | t      | c    |     |          |         |      |        |      |           |    |          |        |       |        |     |         |      |          |         |           |         |          | t         |   |   |
| t                         | 5001344                 | c                    | 5016031                   | c                | 4966041               | s                 | UTI89/AS                    | rec38               | c                                    | UTI89                                 | +++                        | c      | c    |     |          |         |      |        |      |           |    |          |        |       |        |     |         |      |          |         |           |         |          |           | c |   |
| a                         | 5001364                 | c                    | 5016051                   | c                | 4966061               | ns                | UTI89/AS                    | rec38               | c                                    | UTI89                                 | +++                        | c      | c    |     |          |         |      |        |      |           |    |          |        |       |        |     |         |      |          |         |           |         |          |           | c |   |
| t                         | 5001371                 | c                    | 5016058                   | c                | 4966068               | s                 | UTI89/AS                    | rec38               | c                                    | UTI89                                 | +++                        | c      | c    |     |          |         |      |        |      |           |    |          |        |       |        |     |         |      |          |         |           |         |          |           | c |   |
| g                         | 5001437                 | t                    | 5016124                   | t                | 4966134               | s                 | UTI89/AS                    | rec38               | t                                    | UTI89                                 | +                          | c      | t    |     |          |         |      |        |      |           |    |          |        |       |        |     |         |      |          |         |           |         |          |           | t |   |
|                           |                         |                      |                           |                  |                       |                   |                             |                     |                                      |                                       |                            |        |      |     |          |         |      |        |      |           |    |          |        |       |        |     |         |      |          |         |           |         |          |           |   |   |
| a                         | 5001461                 | g                    | 5016148                   | g                | 4966158               | s                 | UTI89/AS                    | rec38               | g                                    | UTI89                                 | +++                        | g      | g    |     |          |         |      |        |      |           |    |          |        |       |        |     |         |      |          |         |           |         |          |           | g |   |
| c                         | 5001464                 | t                    | 5016151                   | t                | 4966161               | s                 | UTI89/AS                    | rec38               | t                                    | UTI89                                 | +                          | t      | t    |     |          |         |      |        |      |           |    |          |        |       |        |     |         |      |          |         |           |         |          |           | t |   |
| c                         | 5001570                 | t                    | 5016257                   | t                | 4966267               | s                 | UTI89/AS                    | rec38               | c                                    | AS                                    | +++                        | t      | c    |     |          |         |      |        |      |           |    |          |        |       |        |     |         |      |          |         |           |         |          |           | c |   |
| a                         | 5001582                 | g                    | 5016269                   | g                | 4966279               | s                 | UTI89/AS                    | rec38               | g                                    | UTI89                                 | ++                         | g      | g    |     |          |         |      |        |      |           |    |          |        |       |        |     |         |      |          |         |           |         |          |           | a |   |
| c                         | 5001585                 | a                    | 5016272                   | a                | 4966282               | s                 | UTI89/AS                    | rec38               | a                                    | UTI89                                 | +++                        | a      | a    |     |          |         |      |        |      |           |    |          |        |       |        |     |         |      |          |         |           |         |          |           | a |   |
| t                         | 5001741                 | g                    | 5016428                   | g                | 4966438               | s                 | UTI89/AS                    | rec38               | g                                    | UTI89                                 | +++                        | g      | g    |     |          |         |      |        |      |           |    |          |        |       |        |     |         |      |          |         |           |         |          |           | g |   |
| t                         | 5001744                 | c                    | 5016431                   | c                | 4966441               | s                 | UTI89/AS                    | rec38               | c                                    | UTI89                                 | +++                        | c      | c    |     |          |         |      |        |      |           |    |          |        |       |        |     |         |      |          |         |           |         |          |           | c |   |
| g                         | 5001753                 | t                    | 5016440                   | t                | 4966450               | s                 | UTI89/AS                    | rec38               | t                                    | UTI89                                 | +                          | t      | t    |     |          |         |      |        |      |           |    |          |        |       |        |     |         |      |          |         |           |         |          |           | t |   |
| a                         | 5001849                 | g                    | 5016536                   | g                | 4966546               | s                 | UTI89/AS                    | rec38               | g                                    | UTI89                                 | ++                         | g      | g    |     |          |         |      |        |      |           |    |          |        |       |        |     |         |      |          |         |           |         |          |           | a |   |
| c                         | 5001861                 | a                    | 5016548                   | a                | 4966558               | s                 | UTI89/AS                    | rec38               | c                                    | AS                                    | +                          | a      | c    |     |          |         |      |        |      |           |    |          |        |       |        |     |         |      |          |         |           |         |          |           | t |   |
| c                         | 5001867                 | t                    | 5016554                   | t                | 4966564               | s                 | UTI89/AS                    | rec38               | c                                    | AS                                    | +++                        | t      | c    |     |          |         |      |        |      |           |    |          |        |       |        |     |         |      |          |         |           |         |          |           | c |   |
| c                         | 5001900                 | t                    | 5016587                   | t                | 4966597               | s                 | UTI89/AS                    | rec38               | t                                    | UTI89                                 | +                          | t      | t    |     |          |         |      |        |      |           |    |          |        |       |        |     |         |      |          |         |           |         |          |           | t |   |
| t                         | 5001903                 | c                    | 5016590                   | c                | 4966600               | s                 | UTI89/AS                    | rec38               | c                                    | UTI89                                 | +                          | c      | c    |     |          |         |      |        |      |           |    |          |        |       |        |     |         |      |          |         |           |         |          |           | c |   |
| t                         | 5001966                 | c                    | 5016653                   | c                | 4966663               | s                 | UTI89/AS                    | rec38               | t                                    | AS                                    | +                          | c      | t    |     |          |         |      |        |      |           |    |          |        |       |        |     |         |      |          |         |           |         |          |           | t |   |
| a                         | 5002033                 | g                    | 5016720                   | g                | 4966730               | ns                | UTI89/AS                    | rec38               | g                                    | UTI89                                 | ++                         | g      | g    |     |          |         |      |        |      |           |    |          |        |       |        |     |         |      |          |         |           |         |          |           | a |   |
|                           |                         |                      |                           |                  |                       |                   |                             |                     |                                      |                                       |                            |        |      |     |          |         |      |        |      |           |    |          |        |       |        |     |         |      |          |         |           |         |          |           |   |   |
| c                         | 5002044                 | t                    | 5016731                   | t                | 4966741               | s                 | UTI89/AS                    | rec38               | ?                                    | U/AS                                  | +/-                        | t      | c    |     |          |         |      |        |      |           |    |          |        |       |        |     |         |      |          |         |           |         |          |           | t |   |
| c                         | 5002045                 | t                    | 5016732                   | t                | 4966742               | s                 | UTI89/AS                    | rec38               | c                                    | AS                                    | +++                        | t      | c    |     |          |         |      |        |      |           |    |          |        |       |        |     |         |      |          |         |           |         |          |           | c |   |
| a                         | 5002095                 | g                    | 5016782                   | g                | 4966792               | s                 | UTI89/AS                    | rec38               | g                                    | UTI89                                 | +++                        | g      | g    |     |          |         |      |        |      |           |    |          |        |       |        |     |         |      |          |         |           |         |          |           |   | g |
| g                         | 5002110                 | a                    | 5016797                   | a                | 4966807               | s                 | UTI89/AS                    | rec38               | g                                    | AS                                    | +++                        | a      | g    |     |          |         |      |        |      |           |    |          |        |       |        |     |         |      |          |         |           |         |          |           | g |   |
| a                         | 5002223                 | t                    | 5016910                   | t                | 4966920               | ns                | UTI89/AS                    | rec38               | t                                    | UTI89                                 | +                          | t      | t    |     |          |         |      |        |      |           |    |          |        |       |        |     |         |      |          |         |           |         |          |           | t |   |
| a                         | 5002236                 | c                    | 5016923                   | c                | 4966933               | s                 | UTI89/AS                    | rec38               | c                                    | UTI89                                 | +                          | c      | c    |     |          |         |      |        |      |           |    |          |        |       |        |     |         |      |          |         |           |         |          |           | a |   |
| a                         | 5002284                 | g                    | 5016971                   | g                | 4966981               | s                 | UTI89/AS                    | rec38               | g                                    | UTI89                                 | ++                         | g      | g    |     |          |         |      |        |      |           |    |          |        |       |        |     |         |      |          |         |           |         |          |           | a |   |
| t                         | 5002293                 | c                    | 5016980                   | c                | 4966990               | s                 | UTI89/AS                    | rec38               | t                                    | AS                                    | +                          | c      | t    |     |          |         |      |        |      |           |    |          |        |       |        |     |         |      |          |         |           |         |          |           | t |   |
| c                         | 5002311                 | a                    | 5016998                   | a                | 4967008               | s                 | UTI89/AS                    | rec38               | a                                    | UTI89                                 | ++                         | a      | a    |     |          |         |      |        |      |           |    |          |        |       |        |     |         |      |          |         |           |         |          |           | c |   |
| t                         | 5002338                 | c                    | 5017025                   | c                | 4967035               | s                 | UTI89/AS                    | rec38               | t                                    | AS                                    | +                          | c      | t    |     |          |         |      |        |      |           |    |          |        |       |        |     |         |      |          |         |           |         |          |           | t |   |
| a                         | 5002359                 | t                    | 5017046                   | t                | 4967056               | s                 | UTI89/AS                    | rec38               | t                                    | UTI89                                 | +                          | t      | g    |     |          |         |      |        |      |           |    |          |        |       |        |     |         |      |          |         |           |         |          |           | a |   |
|                           |                         |                      |                           |                  |                       |                   |                             |                     |                                      |                                       |                            |        |      |     |          |         |      |        |      |           |    |          |        |       |        |     |         |      |          |         |           |         |          |           |   |   |
| c                         | 5002374                 | t                    | 5017061                   | t                | 4967071               | s                 | UTI89/AS                    | rec38               | t                                    | UTI89                                 | +                          | t      | t    |     |          |         |      |        |      |           |    |          |        |       |        |     |         |      |          |         |           |         |          |           | c |   |
| t                         | 5002377                 | c                    | 5017064                   | c                | 4967074               | s                 | UTI89/AS                    | rec38               | c                                    | UTI89                                 | +                          | c      | c    |     |          |         |      |        |      |           |    |          |        |       |        |     |         |      |          |         |           |         |          |           | t |   |
| g                         | 5002432                 | a                    | 5017119                   | a                | 4967129               | ns                | UTI89/AS                    | rec38               | g                                    | AS                                    | ++++                       | a      | g    |     |          |         |      |        |      |           |    |          |        |       |        |     |         |      |          |         |           |         |          |           | g |   |
| g                         | 5002458                 | a                    | 5017145                   | a                | 4967155               | s                 | UTI89/AS                    | rec38               | a                                    | UTI89                                 | ++                         | a      | a    |     |          |         |      |        |      |           |    |          |        |       |        |     |         |      |          |         |           |         |          |           | a |   |
| g                         | 5002506                 | a                    | 5017193                   | a                | 4967203               | s                 | UTI89/AS                    | rec38               | a                                    | UTI89                                 | +                          | a      | g    |     |          |         |      |        |      |           |    |          |        |       |        |     |         |      |          |         |           |         |          |           | a |   |
| t                         | 5006849                 | c                    | 5024148                   | c                | 4974158               | s                 | UTI89/AS                    | rec38               | c                                    | UTI89                                 | +                          |        |      |     |          |         |      |        |      |           |    |          |        |       |        |     |         |      |          |         |           |         |          |           |   |   |

Table S8. Allocation of recombinational SNPs to lineages by virtual outgroup analysis<sup>a</sup>

Table S8. Allocation of recombinational SNPs to lineages by virtual outgroup analysis<sup>a</sup>

| ExPEC genome site details |                         |                      |                           |                  |                       |                   |                             |                     |                                      | Outgroup Strains Details <sup>1</sup> |                            |        |      |     |          |         |      |        |      |           |    |          |        |       |        |     |         |      |          |         |           |         |          |           |
|---------------------------|-------------------------|----------------------|---------------------------|------------------|-----------------------|-------------------|-----------------------------|---------------------|--------------------------------------|---------------------------------------|----------------------------|--------|------|-----|----------|---------|------|--------|------|-----------|----|----------|--------|-------|--------|-----|---------|------|----------|---------|-----------|---------|----------|-----------|
| UT189 <sup>b</sup>        | UT189 site <sup>c</sup> | APEC 01 <sup>b</sup> | APEC 01 site <sup>c</sup> | S88 <sup>b</sup> | S88 site <sup>c</sup> | type <sup>d</sup> | Event Lineage <sup>ef</sup> | Recombinant segment | Inferred ancestral base <sup>g</sup> | Outgroup Analysis <sup>e</sup>        | Support level <sup>h</sup> | CFT073 | ED1a | 536 | E2348/69 | SMS 3-5 | IA39 | UMN026 | K-12 | ATCC 8739 | HS | D1 Sd197 | CB9615 | Sakai | EDL933 | IA1 | E24377A | SE11 | SS Sd046 | F2a 301 | F2a 2457T | F5 8401 | B4 Sd227 | B18 BS512 |
| a                         | 5015643                 | g                    | 5032929                   | g                | 4982939               | s                 | UTI89/AS                    | rec38               | a                                    | AS                                    | +                          |        |      |     | a        | a       | a    |        |      |           |    | a        | a      | a     |        |     |         | a    | a        | a       |           |         |          |           |
| g                         | 5015757                 | t                    | 5033043                   | t                | 4983053               | s                 | UTI89/AS                    | rec38               | g                                    | AS                                    | +                          |        |      |     | g        | g       | g    |        |      |           |    | g        | g      | g     |        |     |         | g    | g        | g       |           |         |          |           |
| g                         | 5015769                 | a                    | 5033055                   | a                | 4983065               | s                 | UTI89/AS                    | rec38               | g                                    | AS                                    | +                          |        |      |     | g        | g       | g    |        |      |           |    | g        | g      | g     |        |     |         | g    | g        | g       |           |         |          |           |
| a                         | 5015775                 | g                    | 5033061                   | g                | 4983071               | s                 | UTI89/AS                    | rec38               | g                                    | UTI89                                 | +                          |        |      |     | g        | g       | g    |        |      |           |    | g        | g      | g     |        |     |         | g    | g        | g       |           |         |          |           |
| g                         | 5015784                 | a                    | 5033070                   | a                | 4983080               | s                 | UTI89/AS                    | rec38               | g                                    | AS                                    | +                          |        |      |     | g        | g       | g    |        |      |           |    | g        | g      | g     |        |     |         | g    | g        | g       |           |         |          |           |
| g                         | 5015851                 | a                    | 5033137                   | a                | 4983147               | ns                | UTI89/AS                    | rec38               | g                                    | AS                                    | +                          |        |      |     | g        | g       | g    |        |      |           |    | g        | g      | g     |        |     |         | g    | g        | g       |           |         |          |           |
| t                         | 5015852                 | c                    | 5033138                   | c                | 4983148               | ns                | UTI89/AS                    | rec38               | c                                    | UTI89                                 | +                          |        |      |     | c        | c       | c    |        |      |           |    | c        | c      | c     |        |     |         | c    | c        | c       |           |         |          |           |
| c                         | 5015871                 | a                    | 5033157                   | a                | 4983167               | s                 | UTI89/AS                    | rec38               | c                                    | AS                                    | +                          |        |      |     | c        | c       | c    |        |      |           |    | t        | t      | t     |        |     |         | a    | a        | a       |           |         |          |           |
| c                         | 5015912                 | t                    | 5033198                   | t                | 4983208               | nc                | UTI89/AS                    | rec38               | c                                    | AS                                    | +                          |        |      |     | c        | c       | c    |        |      |           |    | c        | c      | c     |        |     |         | c    | c        | c       |           |         |          |           |
| g                         | 5015957                 | a                    | 5033243                   | a                | 4983253               | ns                | UTI89/AS                    | rec38               | g                                    | AS                                    | +                          |        |      |     | g        | g       | g    |        |      |           |    | g        | g      | g     |        |     |         | a    | a        | a       |           |         |          |           |
| g                         | 5016028                 | a                    | 5033314                   | a                | 4983324               | ns                | UTI89/AS                    | rec38               | g                                    | AS                                    | +                          |        |      |     | g        | g       | g    |        |      |           |    | g        | g      | g     |        |     |         | a    | a        | a       |           |         |          |           |
| t                         | 5016066                 | g                    | 5033352                   | g                | 4983362               | s                 | UTI89/AS                    | rec38               | a                                    | U/AS                                  | +/-                        |        |      |     | a        | a       | a    |        |      |           |    | a        | a      | a     |        |     |         | g    | g        | g       |           |         |          |           |
| g                         | 5016287                 | t                    | 5033573                   | t                | 4983583               | ns                | UTI89/AS                    | rec38               | g                                    | AS                                    | +                          |        |      |     | g        | g       | g    |        |      |           |    | g        | g      | g     |        |     |         | g    | g        | g       |           |         |          |           |
| t                         | 5016431                 | c                    | 5033717                   | c                | 4983727               | s                 | UTI89/AS                    | rec38               | c                                    | UTI89                                 | +                          |        |      |     | c        | c       | c    |        |      |           |    | c        | c      | c     |        |     |         | c    | c        | c       |           |         |          |           |
| c                         | 5016702                 | t                    | 5033988                   | t                | 4983998               | s                 | UTI89/AS                    | rec38               | c                                    | AS                                    | +                          |        |      |     | c        | c       | t    |        |      |           |    | t        | t      | t     |        |     |         | t    | t        | t       |           |         |          |           |
| g                         | 5016816                 | a                    | 5034102                   | a                | 4984112               | s                 | UTI89/AS                    | rec38               | g                                    | AS                                    | +                          |        |      |     | g        | g       | g    |        |      |           |    | g        | g      | g     |        |     |         | g    | g        | g       |           |         |          |           |
| g                         | 5016819                 | t                    | 5034105                   | t                | 4984115               | s                 | UTI89/AS                    | rec38               | t                                    | UTI89                                 | +                          |        |      |     | t        | t       | t    |        |      |           |    | t        | t      | t     |        |     |         | t    | t        | t       |           |         |          |           |
| g                         | 5016930                 | a                    | 5034216                   | a                | 4984226               | s                 | UTI89/AS                    | rec38               | g                                    | AS                                    | +                          |        |      |     | g        | g       | a    |        |      |           |    | a        | a      | a     |        |     |         | c    | c        | c       |           |         |          |           |
| t                         | 5017047                 | g                    | 5034333                   | g                | 4984343               | s                 | UTI89/AS                    | rec38               | g                                    | UTI89                                 | +                          |        |      |     | g        | g       | g    |        |      |           |    | a        | a      | a     |        |     |         | g    | g        | g       |           |         |          |           |
| g                         | 5017146                 | t                    | 5034432                   | t                | 4984442               | s                 | UTI89/AS                    | rec38               | g                                    | AS                                    | +                          |        |      |     | a        | a       | a    |        |      |           |    | g        | g      | g     |        |     |         | a    | a        | a       |           |         |          |           |
| a                         | 5017238                 | t                    | 5034524                   | t                | 4984534               | ns                | UTI89/AS                    | rec38               | a                                    | AS                                    | +                          |        |      |     | a        | a       | a    |        |      |           |    | a        | a      | a     |        |     |         | a    | a        | a       |           |         |          |           |
| t                         | 5017275                 | a                    | 5034561                   | a                | 4984571               | s                 | UTI89/AS                    | rec38               | t                                    | AS                                    | +                          |        |      |     | t        | t       | t    |        |      |           |    | t        | t      | t     |        |     |         | g    | g        | g       |           |         |          |           |
| g                         | 5017371                 | a                    | 5034657                   | a                | 4984667               | s                 | UTI89/AS                    | rec38               | g                                    | AS                                    | +                          |        |      |     | g        | a       | g    |        |      |           |    | a        | a      | a     |        |     |         | a    | a        | a       |           |         |          |           |
| g                         | 5017506                 | t                    | 5034792                   | t                | 4984802               | s                 | UTI89/AS                    | rec38               | g                                    | AS                                    | +                          |        |      |     | g        | g       | t    |        |      |           |    | a        | a      | a     |        |     |         | t    | t        | t       |           |         |          |           |
| a                         | 5017533                 | g                    | 5034819                   | g                | 4984829               | s                 | UTI89/AS                    | rec38               | a                                    | AS                                    | +                          |        |      |     | a        | g       | g    |        |      |           |    | g        | g      | g     |        |     |         | g    | g        | g       |           |         |          |           |
| t                         | 5017536                 | c                    | 5034822                   | c                | 4984832               | s                 | UTI89/AS                    | rec38               | t                                    | AS                                    | +                          |        |      |     | t        | c       | c    |        |      |           |    | t        | t      | t     |        |     |         | g    | g        | g       |           |         |          |           |
| c                         | 5017600                 | t                    | 5034886                   | t                | 4984896               | s                 | UTI89/AS                    | rec38               | c                                    | AS                                    | +                          |        |      |     | c        | c       | t    |        |      |           |    | c        | c      | c     |        |     |         | c    | c        | c       |           |         |          |           |
| c                         | 5017766                 | t                    | 5035052                   | t                | 4985062               | ns                | UTI89/AS                    | rec38               | c                                    | AS                                    | +                          |        |      |     | c        | c       | c    |        |      |           |    | c        | c      | c     |        |     |         | c    | c        | c       |           |         |          |           |
| g                         | 5017817                 | a                    | 5035103                   | a                | 4985113               | ns                | UTI89/AS                    | rec38               | g                                    | AS                                    | +                          |        |      |     | g        | a       | a    |        |      |           |    | a        | a      | a     |        |     |         | a    | a        | a       |           |         |          |           |
| g                         | 5017888                 | a                    | 5035174                   | a                | 4985184               | ns                | UTI89/AS                    | rec38               | a                                    | UTI89                                 | +                          |        |      |     | a        | a       | a    |        |      |           |    | a        | a      | a     |        |     |         | a    | a        | a       |           |         |          |           |
| a                         | 5017926                 | g                    | 5035212                   | g                | 4985222               | s                 | UTI89/AS                    | rec38               | a                                    | AS                                    | +                          |        |      |     | a        | t       | t    |        |      |           |    | g        | g      | g     |        |     |         | g    | g        | g       |           |         |          |           |
| g                         | 5017947                 | t                    | 5035233                   | t                | 4985243               | s                 | UTI89/AS                    | rec38               | g                                    | AS                                    | +                          |        |      |     | g        | t       | t    |        |      |           |    | t        | t      | t     |        |     |         | g    | g        | g       |           |         |          |           |
| g                         | 5018025                 | t                    | 5035311                   | t                | 4985321               | s                 | UTI89/AS                    | rec38               | g                                    | AS                                    | +                          |        |      |     | g        | g       | t    |        |      |           |    | t        | t      | t     |        |     |         | g    | g        | g       |           |         |          |           |
| a                         | 5018055                 | g                    | 5035341                   | g                | 4985351               | s                 | UTI89/AS                    | rec38               | a                                    | AS                                    | +                          |        |      |     | a        | a       | g    |        |      |           |    | g        | g      | g     |        |     |         | g    | g        | g       |           |         |          |           |
| t                         | 5018119                 | g                    | 5035405                   | g                | 4985415               | ns                | UTI89/AS                    | rec38               | t                                    | AS                                    | +                          |        |      |     | t        | g       | g    |        |      |           |    | g        | g      | g     |        |     |         | g    | g        | g       |           |         |          |           |
| g                         | 5018187                 | a                    | 5035473                   | a                | 4985483               | s                 | UTI89/AS                    | rec38               | g                                    | AS                                    | +                          |        |      |     | g        | a       | a    |        |      |           |    | a        | a      | a     |        |     |         | g    | g        | g       |           |         |          |           |
| g                         | 5018211                 | t                    | 5035497                   | t                | 4985507               | ns                | UTI89/AS                    | rec38               | g                                    | AS                                    | +                          |        |      |     | g        | t       | t    |        |      |           |    | t        | t      | t     |        |     |         | t    | t        | t       |           |         |          |           |
| a                         | 5018220                 | g                    | 5035506                   | g                | 4985516               | s                 | UTI89/AS                    | rec38               | a                                    | AS                                    | +                          |        |      |     | a        | g       | g    |        |      |           |    | g        | g      | g     |        |     |         | g    | g        | g       |           |         |          |           |
| a                         | 5018395                 | g                    | 5035681                   | g                | 4985691               | ns                | UTI89/AS                    | rec38               | a                                    | AS                                    | +                          |        |      |     | a        | g       | g    |        |      |           |    | g        | g      | g     |        |     |         | g    | g        | g       |           |         |          |           |
| a                         | 5018660                 | c                    | 5035946                   | c                | 4985956               | ns                | UTI89/AS                    | rec38               | c                                    | UTI89                                 | +                          |        |      |     | c        | c       | c    |        |      |           |    | c        | c      | c     |        |     |         | c    | c        | c       |           |         |          |           |
| t                         | 5018814                 | c                    | 5036100                   | c                | 4986110               | s                 | UTI89/AS                    | rec38               | t                                    | AS                                    | +                          |        |      |     | t        | c       | c    |        |      |           |    | c        | c      | c     |        |     |         | t    | t        | t       |           |         |          |           |
| a                         | 5018826                 | g                    | 5036112                   | g                | 4986122               | s                 | UTI89/AS                    | rec38               | a                                    | AS                                    | +                          |        |      |     | a        | g       | g    |        |      |           |    | g        | g      | g     |        |     |         | g    | g        | g       |           |         |          |           |
| a                         | 5018833                 | g                    | 5036119                   | g                | 4986129               | ns                | UTI89/AS                    | rec38               | a                                    | AS                                    | +                          |        |      |     | a        | g       | g    |        |      |           |    | g        | g      | g     |        |     |         | a    | a        | a       |           |         |          |           |
| t                         | 5018835                 | c                    | 5036121                   | c                | 4986131               | ns                | UTI89/AS                    | rec38               | t                                    | AS                                    | +                          |        |      |     | t        | c       | c    |        |      |           |    | c        | c      | c     |        |     |         | t    | t        | t       |           |         |          |           |
| g                         | 5018874                 | a                    | 5036160                   | a                | 4986170               | s                 | UTI89/AS                    | rec38               | g                                    | AS                                    | +                          |        |      |     | g        | a       | g    |        |      |           |    | a        | a      | a     |        |     |         | g    | g        | g       |           |         |          |           |
| t                         | 5018904                 | c                    | 5036190                   | c                | 4986200               | s                 | UTI89/AS                    | rec38               | t                                    | AS                                    | +                          |        |      |     | t        | c       | c    |        |      |           |    | c        | c      | c     |        |     |         | g    | g        | g       |           |         |          |           |
| a                         | 5019058                 | g                    | 5036344                   | g                | 4986354               | ns                | UTI89/AS                    | rec38               | a                                    | AS                                    | +                          |        |      |     | a        | g       | g    |        |      |           |    | g        | g      | g     |        |     |         | g    | g        | g       |           |         |          |           |
| c                         | 5019062                 | t                    | 5036348                   | t                | 4986358               | ns                | UTI89/AS                    | rec38               | c                                    | AS                                    | +                          |        |      |     | c        | t       | t    |        |      |           |    | t        | t      | t     |        |     |         | c    | c        | c       |           |         |          |           |
| t                         | 5019063                 | g                    | 5036349                   | g                | 4986359               | ns                | UTI89/AS                    | rec38               | t                                    | AS                                    | +                          |        |      |     | t        | g       | g    |        |      |           |    | a        | a      | a     |        |     |         | g    | g        | g       |           |         |          |           |
| g                         | 5019357                 | t                    | 5036652                   | t                | 4986662               | ns                | UTI89/AS                    | rec38               | g                                    | AS                                    | +                          |        |      |     | g        | t       | t    |        |      |           |    | t        | t      | t     |        |     |         | t    | t        | t       |           |         |          |           |
| c                         | 5019372                 | t                    | 5036667                   | t                | 4986677               | s                 | UTI89/AS                    | rec38               | c                                    | AS                                    | +                          |        |      |     | c        | t       | t    |        |      |           |    | t        | t      | t     |        |     |         | c    | c        | c       |           |         |          |           |
| c                         | 5019466                 | t                    | 5036761                   | t                | 4986771               | ns                | UTI89/AS                    | rec38               | t                                    | UTI89                                 | +                          |        |      |     | t        | t       | t    |        |      |           |    | t        | t      | t     |        |     |         | c    | c        | c       |           |         |          |           |
| t                         | 5019513                 | g                    | 5036808                   | g                | 4986818               | ns                | UTI89/AS                    | rec38               | g                                    | UTI89                                 | +                          |        |      |     | g        | g       | g    |        |      |           |    | g        | g      | g     |        |     |         | t    | t        | t       |           |         |          |           |
| t                         | 5019516                 | g                    | 5036811                   | g                | 4986821               | ns                | UTI89/AS                    | rec38               | t                                    | AS                                    | +                          |        |      |     | t        | t       | t    |        |      |           |    | t        | t      | t     |        |     |         | t    | t        | t       |           |         |          |           |
| g                         | 5019535                 | t                    | 5036830                   | t                | 4986840               | ns                | UTI89/AS                    | rec38               | t                                    | UTI89                                 | +                          |        |      |     | t        | t       | t    |        |      |           |    | t        | t      | t     |        |     |         | g    | g        | g       |           |         |          |           |
| t                         | 5019552                 | c                    | 5036847                   | c                | 4986857               | ns                | UTI89/AS                    | rec38               | c                                    | UTI89                                 | +                          |        |      |     | c        | c       | c    |        |      |           |    | c        | c      | c     |        |     |         | t    | t        | t       |           |         |          |           |
| t                         | 5019605                 | c                    | 5036900                   | c                | 4986910               | s                 | UTI89/AS                    | rec38               | c                                    | UTI89                                 | +                          |        |      |     | c        | c       | c    |        |      |           |    | c        | c      | c     |        |     |         | t    | t        | t       |           |         |          |           |
| t                         | 5019618                 | c                    | 5036913                   | c                | 4986923               | ns                | UTI89/AS                    | rec38               | c                                    | UTI89                                 | +                          |        |      |     | c        | c       | c    |        |      |           |    |          |        |       |        |     |         |      |          |         |           |         |          |           |

Table S8. Allocation of recombinational SNPs to lineages by virtual outgroup analysis<sup>a</sup>

Table S8. Allocation of recombinational SNPs to lineages by virtual outgroup analysis<sup>a</sup>

| ExPEC genome site details |                         |                      |                           |                  |                       |                   |                             |                     |                                      | Outgroup Strains Details <sup>1</sup> |                            |        |      |     |          |         |      |        |      |           |    |          |        |       |        |     |         |      |          |         |           |         |          |           |   |   |   |
|---------------------------|-------------------------|----------------------|---------------------------|------------------|-----------------------|-------------------|-----------------------------|---------------------|--------------------------------------|---------------------------------------|----------------------------|--------|------|-----|----------|---------|------|--------|------|-----------|----|----------|--------|-------|--------|-----|---------|------|----------|---------|-----------|---------|----------|-----------|---|---|---|
| UTI89 <sup>b</sup>        | UTI89 site <sup>c</sup> | APEC 01 <sup>b</sup> | APEC 01 site <sup>c</sup> | S86 <sup>b</sup> | S86 site <sup>c</sup> | type <sup>d</sup> | Event Lineage <sup>ef</sup> | Recombinant segment | Inferred ancestral base <sup>g</sup> | Outgroup Analysis <sup>e</sup>        | Support level <sup>h</sup> | CFT073 | ED1a | 536 | E2348/69 | SMS 3-5 | IA39 | UMN026 | K-12 | ATCC 8739 | HS | D1 Sd197 | CB9615 | Sakai | EDL933 | IA1 | E24377A | SE11 | SS Sd046 | F2a 301 | F2a 2457T | F5 8401 | B4 Sd227 | B18 BS512 |   |   |   |
| t                         | 5022134                 | c                    | 5039429                   | c                | 4989439               | s                 | UTI89/AS                    | rec38               | c                                    | UTI89                                 | ++++                       | c      | t    | c   | c        | c       | c    | c      | c    | c         | c  | c        | c      | c     | c      | c   | c       | c    | c        | c       | c         | c       | c        | c         |   |   |   |
| g                         | 5022236                 | a                    | 5039531                   | a                | 4989541               | s                 | UTI89/AS                    | rec38               | g                                    | AS                                    | ++                         | g      | g    | g   | g        | a       | a    | g      | g    | g         | g  | a        | g      | g     | g      | g   | g       | g    | g        | g       | g         | g       | g        | g         |   |   |   |
| g                         | 5022247                 | c                    | 5039542                   | c                | 4989552               | ns                | UTI89/AS                    | rec38               | c                                    | UTI89                                 | ++                         | g      | c    | c   | g        | g       | c    | c      | g    | c         | c  | g        | g      | g     | c      | c   | c       | c    | c        | c       | c         | c       | c        | c         |   |   |   |
| t                         | 5022272                 | c                    | 5039567                   | c                | 4989577               | s                 | UTI89/AS                    | rec38               | t                                    | AS                                    | +                          | c      | t    | t   | t        | t       | t    | c      | c    | c         | c  | t        | t      | t     | t      | t   | t       | t    | t        | t       | t         | t       | t        | t         |   |   |   |
| a                         | 5022305                 | g                    | 5039600                   | g                | 4989610               | s                 | UTI89/AS                    | rec38               | g                                    | UTI89                                 | ++++                       | g      | g    | g   | g        | g       | g    | g      | g    | g         | g  | g        | g      | g     | g      | g   | g       | g    | g        | g       | g         | g       | g        | g         | g |   |   |
| a                         | 5022338                 | c                    | 5039633                   | c                | 4989643               | s                 | UTI89/AS                    | rec38               | c                                    | UTI89                                 | +                          | c      | a    | t   | c        | c       | c    | c      | c    | t         | t  | t        | t      | c     | c      | c   | c       | c    | c        | c       | c         | c       | c        | c         | c |   |   |
| c                         | 5022371                 | t                    | 5039666                   | t                | 4989676               | s                 | UTI89/AS                    | rec38               | t                                    | UTI89                                 | +                          | t      | g    | t   | c        | c       | t    | t      | t    | c         | c  | c        | c      | c     | c      | c   | c       | c    | c        | c       | c         | c       | c        | c         | c |   |   |
| g                         | 5022389                 | c                    | 5039684                   | c                | 4989694               | s                 | UTI89/AS                    | rec38               | g                                    | AS                                    | ++                         | g      | c    | g   | g        | g       | g    | g      | c    | g         | c  | c        | c      | c     | c      | c   | c       | c    | c        | c       | c         | c       | c        | c         | c |   |   |
| t                         | 5022401                 | g                    | 5039696                   | g                | 4989706               | s                 | UTI89/AS                    | rec38               | g                                    | UTI89                                 | +                          | g      | a    | g   | g        | g       | g    | g      | g    | c         | t  | g        | g      | g     | g      | t   | g       | g    | g        | g       | g         | g       | g        | g         | g |   |   |
| c                         | 5022471                 | a                    | 5039766                   | a                | 4989776               | s                 | UTI89/AS                    | rec38               | a                                    | UTI89                                 | ++                         | a      | c    | a   | a        | a       | a    | c      | c    | c         | c  | c        | c      | c     | a      | c   | c       | c    | c        | c       | c         | c       | c        | c         | c |   |   |
| g                         | 5022479                 | a                    | 5039774                   | a                | 4989784               | s                 | UTI89/AS                    | rec38               | g                                    | AS                                    | ++                         | a      | g    | g   | g        | g       | g    | g      | g    | g         | g  | g        | g      | g     | g      | g   | a       | g    | g        | g       | g         | g       | g        | g         | g | g |   |
| t                         | 5022515                 | c                    | 5039810                   | c                | 4989820               | s                 | UTI89/AS                    | rec38               | c                                    | UTI89                                 | +                          | c      | t    | c   | c        | c       | c    | t      | c    | c         | t  | t        | t      | t     | c      | c   | c       | c    | c        | c       | c         | c       | c        | c         | c |   |   |
| a                         | 5022632                 | g                    | 5039927                   | g                | 4989937               | s                 | UTI89/AS                    | rec38               | g                                    | UTI89                                 | ++                         | g      | g    | g   | g        | g       | g    | g      | a    | g         | c  | g        | g      | g     | g      | g   | g       | g    | g        | g       | g         | g       | g        | g         | g | a |   |
| c                         | 5022737                 | t                    | 5040032                   | t                | 4990042               | s                 | UTI89/AS                    | rec38               | c                                    | AS                                    | +                          | c      | g    | g   | c        | c       | c    | c      | c    | c         | c  | t        | t      | t     | c      | c   | c       | c    | c        | c       | c         | c       | c        | c         | c | c |   |
| t                         | 5022752                 | c                    | 5040047                   | c                | 4990057               | s                 | UTI89/AS                    | rec38               | c                                    | UTI89                                 | +                          | c      | t    | c   | t        | t       | c    | t      | t    | c         | t  | c        | c      | c     | c      | c   | c       | c    | c        | c       | c         | c       | c        | c         | c | c |   |
| t                         | 5022782                 | c                    | 5040077                   | c                | 4990087               | s                 | UTI89/AS                    | rec38               | c                                    | UTI89                                 | +                          | c      | c    | c   | c        | c       | c    | c      | c    | c         | c  | c        | c      | c     | c      | c   | c       | c    | c        | c       | c         | c       | c        | c         | c | c |   |
| a                         | 5022845                 | g                    | 5040140                   | g                | 4990150               | s                 | UTI89/AS                    | rec38               | g                                    | UTI89                                 | ++                         | g      | c    | g   | a        | g       | g    | g      | g    | g         | g  | c        | c      | c     | c      | a   | g       | g    | g        | g       | g         | g       | g        | g         | g | g |   |
| t                         | 5022875                 | a                    | 5040170                   | a                | 4990180               | ns                | UTI89/AS                    | rec38               | t                                    | AS                                    | +                          | t      | g    | t   | a        | t       | t    | a      | a    | a         | a  | a        | a      | a     | a      | t   | a       | t    | t        | t       | t         | t       | t        | t         | t | t |   |
| g                         | 5022878                 | a                    | 5040173                   | a                | 4990183               | s                 | UTI89/AS                    | rec38               | g                                    | AS                                    | ++                         | g      | a    | g   | a        | a       | a    | g      | a    | a         | a  | a        | a      | a     | a      | g   | a       | g    | g        | g       | g         | g       | g        | g         | g | g | g |
| a                         | 5022881                 | g                    | 5040176                   | g                | 4990186               | s                 | UTI89/AS                    | rec38               | a                                    | AS                                    | ++                         | a      | a    | a   | g        | a       | a    | g      | a    | g         | g  | g        | g      | g     | g      | a   | a       | a    | a        | a       | a         | a       | a        | a         | a | a |   |
| g                         | 5022950                 | a                    | 5040245                   | a                | 4990255               | s                 | UTI89/AS                    | rec38               | a                                    | UTI89                                 | ++++                       | a      | a    | a   | a        | a       | a    | a      | a    | a         | a  | a        | a      | a     | a      | a   | a       | a    | a        | a       | a         | a       | a        | a         | a | a |   |
| c                         | 5022956                 | t                    | 5040251                   | t                | 4990261               | s                 | UTI89/AS                    | rec38               | t                                    | UTI89                                 | +                          | t      | g    | c   | t        | t       | t    | t      | t    | t         | t  | t        | t      | t     | t      | t   | t       | t    | t        | t       | t         | t       | t        | t         | t | c |   |
| c                         | 5022974                 | t                    | 5040269                   | t                | 4990279               | s                 | UTI89/AS                    | rec38               | c                                    | AS                                    | +                          | t      | c    | c   | t        | c       | c    | t      | t    | t         | t  | t        | t      | t     | t      | t   | t       | t    | t        | t       | t         | t       | t        | t         | t | c |   |
| t                         | 5023025                 | c                    | 5040320                   | c                | 4990330               | s                 | UTI89/AS                    | rec38               | t                                    | AS                                    | +                          | c      | t    | t   | c        | c       | c    | c      | c    | c         | c  | c        | c      | c     | c      | c   | c       | c    | c        | c       | c         | c       | c        | c         | c | t |   |
| t                         | 5023034                 | c                    | 5040329                   | c                | 4990339               | s                 | UTI89/AS                    | rec38               | c                                    | UTI89                                 | +                          | c      | g    | t   | c        | c       | c    | c      | c    | c         | c  | c        | c      | c     | c      | c   | c       | c    | c        | c       | c         | c       | c        | c         | c | t |   |
| t                         | 5023061                 | c                    | 5040356                   | c                | 4990366               | s                 | UTI89/AS                    | rec38               | t                                    | AS                                    | +                          | t      | t    | t   | t        | c       | t    | t      | t    | t         | t  | t        | t      | t     | t      | t   | t       | t    | t        | t       | t         | t       | t        | t         | t | t |   |
| c                         | 5023064                 | t                    | 5040359                   | t                | 4990369               | s                 | UTI89/AS                    | rec38               | c                                    | AS                                    | +                          | g      | g    | c   | g        | t       | g    | g      | g    | g         | c  | g        | g      | g     | c      | g   | t       | t    | t        | t       | t         | t       | t        | t         | t | c |   |
| g                         | 5023066                 | a                    | 5040361                   | a                | 4990371               | ns                | UTI89/AS                    | rec38               | a                                    | UTI89                                 | ++++                       | a      | a    | g   | a        | a       | a    | a      | a    | a         | a  | a        | a      | a     | a      | a   | a       | a    | a        | a       | a         | a       | a        | a         | a | a |   |
| g                         | 5023067                 | c                    | 5040362                   | c                | 4990372               | ns                | UTI89/AS                    | rec38               | c                                    | UTI89                                 | ++++                       | c      | c    | g   | c        | c       | c    | c      | c    | c         | c  | c        | c      | c     | c      | c   | c       | c    | c        | c       | c         | c       | c        | c         | c | c |   |
| c                         | 5023174                 | a                    | 5040469                   | a                | 4990479               | ns                | UTI89/AS                    | rec38               | c                                    | AS                                    | ++++                       | c      | c    | c   | c        | c       | c    | c      | c    | c         | c  | c        | c      | c     | c      | c   | c       | c    | c        | c       | c         | c       | c        | c         | c | c |   |
| a                         | 5023175                 | g                    | 5040470                   | g                | 4990480               | ns                | UTI89/AS                    | rec38               | g                                    | UTI89                                 | ++                         | g      | a    | g   | a        | g       | g    | g      | a    | g         | a  | g        | g      | g     | a      | g   | g       | g    | g        | g       | g         | g       | g        | g         | g | g | g |
| a                         | 5023178                 | g                    | 5040473                   | g                | 4990483               | s                 | UTI89/AS                    | rec38               | g                                    | UTI89                                 | ++                         | g      | g    | g   | g        | g       | g    | g      | a    | g         | a  | g        | g      | g     | a      | g   | g       | g    | g        | g       | g         | g       | g        | g         | g | g | g |
| c                         | 5023370                 | t                    | 5040665                   | t                | 4990675               | s                 | UTI89/AS                    | rec38               | c                                    | AS                                    | +                          | c      | c    | c   | c        | t       | c    | t      | t    | t         | t  | t        | c      | c     | c      | c   | c       | c    | c        | c       | c         | c       | c        | c         | c | c |   |
| c                         | 5023394                 | t                    | 5040689                   | t                | 4990699               | s                 | UTI89/AS                    | rec38               | c                                    | AS                                    | ++++                       | c      | c    | c   | c        | c       | c    | c      | c    | c         | c  | c        | c      | c     | c      | c   | c       | c    | c        | c       | c         | c       | c        | c         | c | c |   |
| c                         | 5023403                 | t                    | 5040698                   | t                | 4990708               | s                 | UTI89/AS                    | rec38               | c                                    | AS                                    | +                          | c      | c    | t   | t        | t       | t    | t      | t    | c         | c  | t        | t      | t     | c      | c   | c       | c    | c        | c       | c         | c       | c        | c         | c | c |   |
| g                         | 5023415                 | a                    | 5040710                   | a                | 4990720               | s                 | UTI89/AS                    | rec38               | a                                    | UTI89                                 | ++                         | a      | c    | a   | a        | a       | g    | a      | a    | a         | a  | a        | a      | a     | a      | a   | a       | a    | a        | a       | a         | a       | a        | a         | a | g |   |
| c                         | 5023421                 | a                    | 5040716                   | a                | 4990726               | s                 | UTI89/AS                    | rec38               | c                                    | AS                                    | +                          | c      | t    | c   | c        | c       | c    | c      | a    | c         | c  | c        | t      | t     | t      | c   | c       | c    | c        | c       | c         | c       | c        | c         | c | c | c |
| c                         | 5023472                 | t                    | 5040767                   | t                | 4990777               | s                 | UTI89/AS                    | rec38               | c                                    | AS                                    | +                          | c      | t    | c   | c        | c       | c    | c      | t    | t         | t  | c        | c      | c     | c      | t   | c       | c    | c        | c       | c         | c       | c        | c         | c | c |   |
| t                         | 5023484                 | c                    | 5040779                   | c                | 4990789               | s                 | UTI89/AS                    | rec38               | t                                    | AS                                    | +                          | t      | g    | c   | t        | t       | t    | t      | c    | c         | c  | c        | c      | c     | t      | t   | c       | c    | c        | c       | c         | c       | c        | c         | c | c |   |
| g                         | 5023487                 | a                    | 5040782                   | a                | 4990792               | s                 | UTI89/AS                    | rec38               | a                                    | UTI89                                 | +                          | a      | t    | a   | t        | g       | t    | a      | a    | a         | a  | a        | a      | a     | a      | a   | a       | a    | a        | a       | a         | a       | a        | a         | a | g |   |
| a                         | 5023505                 | g                    | 5040800                   | g                | 4990810               | s                 | UTI89/AS                    | rec38               | a                                    | AS                                    | ++                         | a      | a    | a   | a        | a       | t    | g      | a    | a         | a  | a        | a      | a     | a      | a   | a       | a    | a        | a       | a         | a       | a        | a         | a | a |   |
| g                         | 5023511                 | c                    | 5040806                   | c                | 4990816               | s                 | UTI89/AS                    | rec38               | c                                    | UTI89                                 | +                          | c      | t    | c   | c        | c       | c    | c      | c    | c         | c  | c        | c      | c     | c      | c   | c       | c    | c        | c       | c         | c       | c        | c         | c | c |   |
| c                         | 5023517                 | t                    | 5040812                   | t                | 4990822               | s                 | UTI89/AS                    | rec38               | c                                    | AS                                    | +                          | c      | t    | c   | c        | c       | c    | c      | t    | t         | c  | c        | c      | c     | c      | c   | c       | c    | c        | c       | c         | c       | c        | c         | c | c |   |
| t                         | 5023529                 | c                    | 5040824                   | c                | 4990834               | s                 | UTI89/AS                    | rec38               | t                                    | AS                                    | +                          | t      | t    | c   | c        | c       | c    | t      | c    | c         | c  | c        | t      | t     | t      | c   | c       | c    | c        | c       | c         | c       | c        | c         | c | c |   |
| g                         | 5023544                 | c                    | 5040839                   | c                | 4990849               | s                 | UTI89/AS                    | rec38               | g                                    | AS                                    | ++                         | g      | c    | g   | c        | g       | c    | c      | c    | c         | c  | c        | g      | g     | g      | c   | g       | c    | c        | c       | c         | c       | c        | c         | c | g |   |
| c                         | 5023559                 | t                    | 5040854                   | t                | 4990864               | s                 | UTI89/AS                    | rec38               | c                                    | AS                                    | +                          | c      | c    | c   | c        | c       | c    | t      | t    | t         | c  | t        | t      | t     | t      | c   | c       | t    | t        | t       | t         | t       | t        | t         | t | c |   |
| g                         | 5023562                 | t                    | 5040857                   | t                | 4990867               | s                 | UTI89/AS                    | rec38               | g                                    | AS                                    | +                          | g      | a    | g   | g        | g       | t    | t      | t    | t         | t  | g        | g      | g     | g      | t   | g       | t    | t        | t       | t         | t       | t        | t         | t | g |   |
| t                         | 5023634                 | c                    | 5040929                   | c                | 4990939               | s                 | UTI89/AS                    | rec38               | c                                    | UTI89                                 | +                          | c      | t    | c   | c        | t       | t    | c      | t    | c         | c  | c        | c      | c     | c      | t   | t       | t    | t        | t       | t         | t       | t        | t         | t | t |   |
| t                         | 5023649                 | c                    | 5040944                   | c                | 4990954               | s                 | UTI89/AS                    | rec38               | c                                    | UTI89                                 | ++++                       | c      | c    | c   | c        | c       | c    | c      | c    | c         | c  | c        | c      | c     | c      | c   | c       | c    | c        | c       | c         | c       | c        | c         | c | c |   |
| a                         | 5023661                 | t                    | 5040956                   | t                | 4990966               | s                 | UTI89/AS                    | rec38               | a                                    | AS                                    | +                          | a      | c    | a   | g        | a       | a    | g      | a    | a         | a  | a        | a      | a     | a      | a   | t       | a    | a        | a       | a         | a       | a        | a         | a | t |   |
| a                         | 5023662                 | g                    | 5040957                   | g                | 4990967               | ns                | UTI89/AS                    | rec38               | a                                    | AS                                    | ++                         | c      | a    | a   | c        | a       | a    | c      | a    | c         | a  | a        | a      | a     | a      | a   | c       | a    | a        | a       | a         | a       | a        | a         | a | c |   |
| g                         | 5023663                 | a                    | 5040958                   | a                | 4990968               | ns                | UTI89/AS                    |                     |                                      |                                       |                            |        |      |     |          |         |      |        |      |           |    |          |        |       |        |     |         |      |          |         |           |         |          |           |   |   |   |

Table S8. Allocation of recombinational SNPs to lineages by virtual outgroup analysis<sup>a</sup>

| ExPEC genome site details |                         |                      |                           |                  |                       |                   |                             |                     |                                      | Outgroup Strains Details <sup>1</sup> |                            |        |      |     |          |         |      |        |      |           |    |          |        |       |        |     |         |      |          |         |           |         |          |           |   |
|---------------------------|-------------------------|----------------------|---------------------------|------------------|-----------------------|-------------------|-----------------------------|---------------------|--------------------------------------|---------------------------------------|----------------------------|--------|------|-----|----------|---------|------|--------|------|-----------|----|----------|--------|-------|--------|-----|---------|------|----------|---------|-----------|---------|----------|-----------|---|
| UT189 <sup>b</sup>        | UTI89 site <sup>c</sup> | APEC 01 <sup>b</sup> | APEC 01 site <sup>c</sup> | S88 <sup>b</sup> | S88 site <sup>c</sup> | type <sup>d</sup> | Event Lineage <sup>ef</sup> | Recombinant segment | Inferred ancestral base <sup>g</sup> | Outgroup Analysis <sup>h</sup>        | Support level <sup>h</sup> | CFT073 | ED1a | 536 | E2348/69 | SMS 3-5 | IA39 | UMN026 | K-12 | ATCC 8739 | HS | D1 Sd197 | CB9615 | Sakai | EDL933 | IA1 | E24377A | SE11 | SS Sd046 | F2a 301 | F2a 2457T | F5 8401 | B4 Sd227 | B18 BS512 |   |
| g                         | 5024336                 | a                    | 5041631                   | a                | 4991641               | s                 | UTI89/AS                    | rec38               | g                                    | AS                                    | ++                         | g      | a    | g   | g        | g       | a    | g      | g    | g         | g  | g        | g      | g     | g      | g   | a       | g    | g        | g       | g         | g       | g        | g         |   |
| a                         | 5024343                 | g                    | 5041638                   | g                | 4991648               | ns                | UTI89/AS                    | rec38               | g                                    | UTI89                                 | ++                         | g      | g    | g   | g        | t       | g    | g      | a    | a         | a  | a        | g      | g     | g      | a   | a       | g    | g        | g       | g         | g       | g        | g         |   |
| c                         | 5024345                 | g                    | 5041640                   | g                | 4991650               | ns                | UTI89/AS                    | rec38               | g                                    | UTI89                                 | ++                         | g      | a    | g   | a        | g       | g    | c      | c    | c         | c  | g        | g      | g     | c      | g   | g       | g    | g        | g       | g         | g       | g        | c         |   |
| g                         | 5024363                 | a                    | 5041658                   | a                | 4991668               | s                 | UTI89/AS                    | rec38               | a                                    | UTI89                                 | ++++                       | a      | a    | a   | c        | a       | a    | a      | a    | a         | a  | a        | a      | a     | a      | a   | a       | a    | a        | a       | a         | a       | a        | a         |   |
| t                         | 5024384                 | c                    | 5041679                   | c                | 4991689               | s                 | UTI89/AS                    | rec38               | c                                    | UTI89                                 | +                          | c      | t    | c   | t        | t       | g    | c      | c    | c         | c  | t        | t      | t     | c      | t   | c       | c    | c        | c       | c         | c       | t        | t         |   |
| a                         | 5024422                 | g                    | 5041717                   | g                | 4991727               | ns                | UTI89/AS                    | rec38               | a                                    | AS                                    | ++                         | a      | a    | a   | a        | a       | a    | a      | a    | a         | a  | a        | a      | a     | a      | a   | a       | g    | g        | g       | g         | g       | g        | a         |   |
| a                         | 5024423                 | g                    | 5041718                   | g                | 4991728               | ns                | UTI89/AS                    | rec38               | a                                    | AS                                    | ++                         | a      | g    | a   | g        | a       | g    | a      | a    | a         | a  | a        | a      | a     | a      | a   | a       | g    | g        | g       | g         | g       | g        | a         |   |
| c                         | 5024441                 | t                    | 5041736                   | t                | 4991746               | s                 | UTI89/AS                    | rec38               | t                                    | UTI89                                 | +                          | t      | g    | t   | c        | t       | g    | c      | t    | t         | t  | c        | c      | c     | c      | t   | t       | t    | t        | t       | t         | t       | t        | t         |   |
| t                         | 5024447                 | c                    | 5041742                   | c                | 4991752               | s                 | UTI89/AS                    | rec38               | c                                    | UTI89                                 | +                          | c      | t    | c   | t        | c       | c    | t      | c    | c         | c  | t        | t      | t     | t      | c   | c       | c    | c        | c       | c         | c       | c        | c         |   |
| a                         | 5024448                 | g                    | 5041743                   | g                | 4991753               | ns                | UTI89/AS                    | rec38               | a                                    | AS                                    | ++                         | a      | g    | a   | g        | a       | g    | a      | g    | g         | g  | g        | a      | a     | a      | a   | g       | g    | g        | g       | g         | g       | g        | g         |   |
| c                         | 5024450                 | t                    | 5041745                   | t                | 4991755               | ns                | UTI89/AS                    | rec38               | c                                    | AS                                    | +                          | c      | g    | c   | t        | t       | g    | c      | t    | t         | c  | c        | c      | c     | c      | t   | t       | t    | t        | t       | t         | t       | t        | t         |   |
| a                         | 5024500                 | g                    | 5041795                   | g                | 4991805               | ns                | UTI89/AS                    | rec38               | a                                    | AS                                    | ++                         | a      | g    | a   | a        | a       | a    | g      | a    | a         | a  | g        | g      | g     | a      | a   | g       | g    | g        | g       | g         | g       | g        | g         |   |
| c                         | 5024502                 | g                    | 5041797                   | g                | 4991807               | ns                | UTI89/AS                    | rec38               | c                                    | AS                                    | ++                         | c      | g    | c   | c        | c       | c    | c      | c    | c         | c  | g        | g      | g     | c      | g   | c       | g    | g        | g       | g         | g       | g        | g         |   |
| c                         | 5024564                 | t                    | 5041859                   | t                | 4991869               | s                 | UTI89/AS                    | rec38               | g                                    | U/AS                                  | +/-                        | g      |      | g   | g        | g       | g    | c      | g    | g         | g  | c        | c      | c     | g      | g   | c       | c    | c        | c       | c         | c       | g        |           |   |
| a                         | 5024650                 | g                    | 5041955                   | g                | 4991955               | ns                | UTI89/AS                    | rec38               | a                                    | AS                                    | +                          |        |      |     | a        | a       | a    | a      | a    | a         | a  | a        | a      | a     | a      | a   | a       | a    | a        | a       | a         | a       | a        |           |   |
| c                         | 5024651                 | t                    | 5041946                   | t                | 4991956               | ns                | UTI89/AS                    | rec38               | c                                    | AS                                    | +                          |        |      |     | c        | c       | c    | c      | c    | c         | c  | c        | c      | c     | c      | c   | c       | c    | c        | c       | c         | c       | c        |           |   |
| a                         | 5024657                 | g                    | 5041952                   | g                | 4991962               | s                 | UTI89/AS                    | rec38               | a                                    | AS                                    | +                          |        |      |     | a        | a       | a    | a      | a    | a         | a  | a        | a      | a     | a      | a   | a       | a    | a        | a       | a         | a       | a        |           |   |
| g                         | 5024694                 | a                    | 5041989                   | a                | 4991999               | ns                | UTI89/AS                    | rec38               | a                                    | UTI89                                 | ++                         | c      | a    |     | a        | c       | c    | a      | a    | c         | c  | c        | a      | a     | a      | c   | c       | a    | a        | a       | a         | a       | a        | a         |   |
| g                         | 5024704                 | a                    | 5041999                   | a                | 4992009               | ns                | UTI89/AS                    | rec38               | g                                    | AS                                    | +                          | g      | t    |     | a        | g       | g    | a      | g    | g         | g  | a        | a      | a     | g      | g   | g       | g    | g        | g       | g         | g       | t        | t         |   |
| g                         | 5024705                 | a                    | 5042000                   | a                | 4992010               | ns                | UTI89/AS                    | rec38               | a                                    | UTI89                                 | ++                         | c      | a    |     | a        | c       | c    | a      | c    | c         | c  | c        | a      | a     | c      | c   | c       | c    | c        | c       | c         | c       | a        | a         |   |
| g                         | 5024720                 | t                    | 5042015                   | t                | 4992025               | s                 | UTI89/AS                    | rec38               | t                                    | UTI89                                 | +                          | t      | t    |     | t        | t       | t    | t      | t    | t         | t  | t        | t      | t     | t      | t   | t       | t    | t        | t       | t         | t       | t        |           |   |
| c                         | 5024721                 | a                    | 5042016                   | a                | 4992026               | ns                | UTI89/AS                    | rec38               | a                                    | UTI89                                 | ++++                       | a      | a    |     | a        | a       | a    | a      | a    | a         | a  | a        | a      | a     | a      | a   | a       | a    | a        | a       | a         | a       | a        | a         |   |
| t                         | 5024729                 | c                    | 5042024                   | c                | 4992034               | s                 | UTI89/AS                    | rec38               | c                                    | UTI89                                 | ++                         | c      | g    |     | c        | c       | c    | c      | c    | c         | c  | c        | c      | c     | c      | c   | c       | c    | c        | c       | c         | c       | g        | g         |   |
| t                         | 5024732                 | c                    | 5042027                   | c                | 4992037               | s                 | UTI89/AS                    | rec38               | t                                    | AS                                    | +                          | t      | g    |     | c        | t       | t    | c      | t    | t         | t  | c        | c      | c     | c      | t   | t       | t    | t        | t       | t         | t       | g        | g         |   |
| t                         | 5024741                 | c                    | 5042036                   | c                | 4992046               | s                 | UTI89/AS                    | rec38               | c                                    | UTI89                                 | +                          | c      | t    |     | c        | t       | c    | c      | c    | c         | c  | t        | c      | c     | c      | c   | c       | c    | t        | t       | t         | t       | t        | t         |   |
| c                         | 5024801                 | t                    | 5042096                   | t                | 4992106               | s                 | UTI89/AS                    | rec38               | c                                    | AS                                    | +                          | t      | c    |     | c        | t       | t    | c      | t    | t         | t  | c        | c      | c     | c      | t   | t       | t    | t        | t       | t         | t       | c        | c         |   |
| g                         | 5024805                 | t                    | 5042100                   | t                | 4992110               | ns                | UTI89/AS                    | rec38               | g                                    | AS                                    | ++++                       | g      | g    |     | g        | g       | g    | g      | g    | g         | g  | g        | g      | g     | g      | g   | g       | g    | g        | g       | g         | g       | g        | g         |   |
| a                         | 5024807                 | t                    | 5042102                   | t                | 4992112               | ns                | UTI89/AS                    | rec38               | a                                    | AS                                    | ++                         | g      | g    |     | a        | g       | a    | g      | a    | g         | g  | a        | a      | a     | g      | g   | g       | g    | g        | g       | g         | g       | g        | g         |   |
| c                         | 5024810                 | t                    | 5042105                   | t                | 4992115               | s                 | UTI89/AS                    | rec38               | c                                    | AS                                    | +                          | t      | c    |     | c        | t       | t    | c      | t    | t         | t  | c        | c      | c     | c      | t   | t       | t    | t        | t       | t         | c       | c        | c         |   |
| g                         | 5024813                 | c                    | 5042108                   | c                | 4992118               | s                 | UTI89/AS                    | rec38               | c                                    | UTI89                                 | ++                         | c      | c    |     | g        | c       | c    | g      | c    | c         | c  | g        | g      | g     | c      | c   | c       | c    | c        | c       | c         | c       | c        | c         |   |
| t                         | 5024816                 | c                    | 5042111                   | c                | 4992121               | s                 | UTI89/AS                    | rec38               | c                                    | UTI89                                 | +                          | c      | c    |     | t        | c       | c    | t      | c    | c         | c  | t        | t      | t     | c      | c   | c       | c    | c        | c       | c         | c       | c        | c         |   |
| g                         | 5024817                 | a                    | 5042112                   | a                | 4992122               | ns                | UTI89/AS                    | rec38               | a                                    | UTI89                                 | ++                         | a      | a    |     | g        | a       | a    | g      | a    | a         | a  | g        | g      | g     | a      | a   | a       | a    | a        | a       | a         | a       | a        | a         |   |
| a                         | 5024818                 | c                    | 5042113                   | c                | 4992123               | ns                | UTI89/AS                    | rec38               | c                                    | UTI89                                 | ++                         | c      | c    |     | a        | c       | c    | a      | c    | c         | c  | a        | a      | a     | c      | c   | c       | c    | c        | c       | c         | c       | c        | c         |   |
| c                         | 5024821                 | g                    | 5042116                   | g                | 4992126               | ns                | UTI89/AS                    | rec38               | c                                    | AS                                    | ++                         | a      | c    |     | c        | a       | a    | c      | a    | a         | a  | c        | c      | c     | c      | a   | a       | a    | a        | a       | a         | a       | c        | c         |   |
| g                         | 5024822                 | a                    | 5042117                   | a                | 4992127               | ns                | UTI89/AS                    | rec38               | g                                    | AS                                    | ++++                       | g      | g    |     | g        | g       | g    | g      | a    | g         | g  | g        | g      | g     | g      | g   | g       | g    | g        | g       | g         | g       | g        | g         |   |
| g                         | 5024825                 | a                    | 5042120                   | a                | 4992130               | s                 | UTI89/AS                    | rec38               | g                                    | AS                                    | ++++                       | g      | g    |     | g        | g       | g    | g      | g    | g         | g  | g        | g      | g     | g      | g   | g       | g    | g        | g       | g         | g       | g        | g         |   |
| c                         | 5024834                 | t                    | 5042129                   | t                | 4992139               | s                 | UTI89/AS                    | rec38               | g                                    | AS                                    | +                          | t      | g    |     | g        | t       | t    | g      | t    | t         | g  | g        | g      | t     | t      | t   | t       | t    | t        | t       | t         | g       | g        |           |   |
| g                         | 5024836                 | g                    | 5042131                   | g                | 4992141               | ns                | UTI89/AS                    | rec38               | c                                    | AS                                    | ++                         | g      | c    |     | c        | g       | g    | c      | g    | g         | g  | c        | c      | c     | g      | g   | g       | g    | g        | g       | g         | g       | c        | c         |   |
| g                         | 5024837                 | t                    | 5042132                   | t                | 4992142               | ns                | UTI89/AS                    | rec38               | g                                    | AS                                    | +                          | t      | g    |     | g        | t       | t    | g      | t    | t         | t  | g        | g      | g     | g      | g   | g       | g    | g        | t       | t         | t       | t        | g         | g |
| a                         | 5024844                 | g                    | 5042139                   | g                | 4992149               | ns                | UTI89/AS                    | rec38               | a                                    | AS                                    | ++                         | g      | a    |     | a        | g       | g    | a      | a    | g         | g  | a        | a      | a     | g      | g   | g       | g    | g        | g       | g         | a       | a        | a         |   |
| c                         | 5024846                 | t                    | 5042141                   | t                | 4992151               | ns                | UTI89/AS                    | rec38               | t                                    | UTI89                                 | +                          | t      | t    |     | c        | t       | t    | c      | t    | t         | c  | c        | c      | c     | t      | t   | t       | t    | t        | t       | t         | t       | t        | t         |   |
| a                         | 5024864                 | c                    | 5042159                   | c                | 4992169               | ns                | UTI89/AS                    | rec38               | a                                    | AS                                    | +                          | a      | t    |     | c        | a       | a    | c      | c    | c         | c  | c        | c      | c     | c      | a   | a       | c    | c        | c       | c         | c       | c        | c         |   |
| g                         | 5024876                 | a                    | 5042171                   | a                | 4992181               | s                 | UTI89/AS                    | rec38               | a                                    | UTI89                                 | +                          | a      | g    |     | a        | a       | a    | g      | a    | a         | g  | g        | g      | a     | a      | a   | a       | a    | a        | a       | a         | g       | g        | g         |   |
| t                         | 5024877                 | c                    | 5042172                   | c                | 4992182               | ns                | UTI89/AS                    | rec38               | c                                    | UTI89                                 | +                          | t      | c    |     | c        | t       | t    | c      | c    | c         | c  | c        | c      | c     | c      | c   | c       | c    | c        | c       | c         | c       | c        | c         |   |
| a                         | 5024878                 | g                    | 5042173                   | g                | 4992183               | ns                | UTI89/AS                    | rec38               | g                                    | UTI89                                 | +                          | a      | g    |     | g        | a       | a    | g      | g    | g         | g  | g        | g      | g     | g      | g   | g       | g    | g        | g       | g         | g       | g        | g         |   |
| t                         | 5024879                 | c                    | 5042174                   | c                | 4992184               | ns                | UTI89/AS                    | rec38               | t                                    | AS                                    | +                          | t      | a    |     | c        | t       | t    | c      | c    | c         | c  | c        | c      | c     | c      | c   | c       | c    | c        | c       | c         | c       | c        | g         |   |
| c                         | 5024891                 | g                    | 5042186                   | g                | 4992196               | s                 | UTI89/AS                    | rec38               | c                                    | AS                                    | ++                         | c      | g    |     | c        | c       | c    | c      | c    | c         | c  | c        | c      | c     | c      | c   | c       | c    | c        | c       | c         | c       | c        | g         |   |
| t                         | 5024903                 | c                    | 5042198                   | c                | 4992208               | s                 | UTI89/AS                    | rec38               | c                                    | UTI89                                 | ++                         | c      | g    |     | c        | c       | c    | c      | c    | c         | c  | c        | c      | c     | c      | c   | c       | c    | c        | c       | c         | c       | c        | g         |   |
| c                         | 5024909                 | t                    | 5042204                   | t                | 4992214               | s                 | UTI89/AS                    | rec38               | c                                    | AS                                    | +                          | t      | c    |     | c        | t       | t    | c      | a    | t         | c  | a        | a      | a     | t      | t   | t       | t    | t        | t       | t         | c       | c        | c         |   |
| t                         | 5024920                 | c                    | 5042215                   | c                | 4992225               | ns                | UTI89/AS                    | rec38               | c                                    | UTI89                                 | +                          | c      | c    |     | c        | c       | c    | c      | t    | c         | c  | t        | t      | t     | t      | t   | t       | t    | t        | t       | t         | c       | c        | c         |   |
| c                         | 5024939                 | t                    | 5042234                   | t                | 4992244               | s                 | UTI89/AS                    | rec38               | c                                    | AS                                    | ++                         | c      | g    |     | c        | c       | c    | c      | c    | c         | c  | c        | c      | c     | c      | c   | c       | c    | c        | c       | c         | c       | g        | g         |   |
| t                         | 5025005                 | c                    | 5042300                   | c                | 4992310               | s                 | UTI89/AS                    | rec38               | c                                    | UTI89                                 | ++++                       | c      | c    |     | c        | c       | c    | c      | c    | c         | c  | c        | c      | c     | c      | c   | c       | c    | c        | c       | c         | c       | c        | c         |   |
| t                         | 5025008                 | c                    | 5042303                   | c                | 4992313               | s                 | UTI89/AS                    | rec38               | c                                    | UTI89                                 | +                          | c      | c    |     | c        | c       | c    | c      | c    | c         | c  | t        | t      | c     | c      | c   | c       | c    | c        | c       | c         | c       | c        | c         |   |
| g                         | 5025122                 | a                    | 5042417                   | a                | 4992427               | s                 | UTI89/AS                    | rec38               | g                                    | AS                                    |                            |        |      |     |          |         |      |        |      |           |    |          |        |       |        |     |         |      |          |         |           |         |          |           |   |

Table S8. Allocation of recombinational SNPs to lineages by virtual outgroup analysis<sup>a</sup>

| ExPEC genome site details |                         |                      |                           |                  |                       |                   |                             |                     |                                      | Outgroup Strains Details <sup>1</sup> |                            |        |      |     |          |         |      |        |      |           |    |          |        |       |        |     |         |      |          |         |           |         |          |           |   |
|---------------------------|-------------------------|----------------------|---------------------------|------------------|-----------------------|-------------------|-----------------------------|---------------------|--------------------------------------|---------------------------------------|----------------------------|--------|------|-----|----------|---------|------|--------|------|-----------|----|----------|--------|-------|--------|-----|---------|------|----------|---------|-----------|---------|----------|-----------|---|
| UTI89 <sup>b</sup>        | UTI89 site <sup>c</sup> | APEC 01 <sup>b</sup> | APEC 01 site <sup>c</sup> | S88 <sup>b</sup> | S88 site <sup>c</sup> | type <sup>d</sup> | Event Lineage <sup>ef</sup> | Recombinant segment | Inferred ancestral base <sup>g</sup> | Outgroup Analysis <sup>e</sup>        | Support level <sup>h</sup> | CFT073 | ED1a | 536 | E2348/69 | SMS 3-5 | IA39 | UMN026 | K-12 | ATCC 8739 | HS | D1 Sd197 | CB9615 | Sakai | EDL933 | IA1 | E24377A | SE11 | SS Sd046 | F2a 301 | F2a 2457T | F5 8401 | B4 Sd227 | B18 BS512 |   |
| c                         | 5025350                 | t                    | 5042645                   | t                | 4992655               | s                 | UTI89/AS                    | rec38               | t                                    | UTI89                                 | +                          | t      | t    |     | t        | t       | t    | a      |      | t         | t  |          | t      | t     | t      | t   | t       | t    | t        | t       | t         | t       | t        | t         |   |
| a                         | 5025351                 | c                    | 5042646                   | c                | 4992656               | ns                | UTI89/AS                    | rec38               | c                                    | UTI89                                 | ++++                       | c      | c    |     | c        | c       | c    | c      |      | c         | c  |          | c      | c     | c      | c   | c       | c    | c        | c       | c         | c       | c        | c         |   |
| g                         | 5025352                 | a                    | 5042647                   | a                | 4992657               | ns                | UTI89/AS                    | rec38               | a                                    | UTI89                                 | ++                         | a      | a    |     | a        | a       | a    | a      |      | a         | a  |          | a      | a     | a      | a   | a       | a    | a        | a       | a         | a       | a        | a         |   |
| t                         | 5025353                 | c                    | 5042648                   | c                | 4992658               | ns                | UTI89/AS                    | rec38               | c                                    | UTI89                                 | ++++                       | c      | c    |     | c        | c       | c    | g      |      | c         | g  |          | c      | c     | c      | c   | c       | c    | c        | c       | c         | c       | c        | c         |   |
| g                         | 5025357                 | c                    | 5042652                   | c                | 4992662               | ns                | UTI89/AS                    | rec38               | c                                    | UTI89                                 | ++++                       | c      | c    |     | c        | c       | c    | a      |      | c         | c  |          | c      | c     | c      | c   | c       | c    | c        | c       | c         | c       | c        | c         |   |
| t                         | 5025358                 | a                    | 5042653                   | a                | 4992663               | ns                | UTI89/AS                    | rec38               | a                                    | UTI89                                 | ++++                       | a      | a    |     | a        | a       | a    | c      |      | a         | a  |          | a      | a     | a      | a   | a       | a    | a        | a       | a         | a       | a        | a         |   |
| a                         | 5025359                 | c                    | 5042654                   | c                | 4992664               | ns                | UTI89/AS                    | rec38               | c                                    | UTI89                                 | +++                        | c      | c    |     | c        | c       | c    | g      |      | c         | c  |          | c      | c     | c      | c   | c       | c    | c        | c       | c         | c       | c        | c         |   |
| a                         | 5025365                 | g                    | 5042660                   | g                | 4992670               | s                 | UTI89/AS                    | rec38               | a                                    | AS                                    | ++                         | g      | a    |     | a        | g       | g    | a      |      | g         | g  |          | g      | g     | g      | g   | g       | g    | g        | g       | g         | g       | g        | g         |   |
| t                         | 5025377                 | g                    | 5042672                   | g                | 4992682               | s                 | UTI89/AS                    | rec38               | g                                    | UTI89                                 | +                          | g      | g    |     | g        | g       | g    | c      |      | g         | g  |          | g      | g     | g      | g   | g       | g    | g        | g       | g         | g       | g        | g         |   |
| a                         | 5025380                 | g                    | 5042675                   | g                | 4992685               | s                 | UTI89/AS                    | rec38               | g                                    | UTI89                                 | ++                         | g      | g    |     | g        | g       | g    | a      |      | g         | a  |          | g      | g     | g      | a   | g       | a    | a        | a       | a         | a       | a        | a         |   |
| t                         | 5025390                 | c                    | 5042685                   | c                | 4992695               | ns                | UTI89/AS                    | rec38               | c                                    | UTI89                                 | ++++                       | c      | c    |     | c        | c       | c    | g      |      | c         | c  |          | c      | c     | c      | c   | c       | c    | c        | c       | c         | c       | c        | c         |   |
| g                         | 5025391                 | t                    | 5042686                   | t                | 4992696               | ns                | UTI89/AS                    | rec38               | t                                    | UTI89                                 | +                          | t      | t    |     | t        | t       | t    | g      |      | t         | t  |          | t      | t     | t      | t   | t       | t    | t        | t       | t         | t       | t        | t         |   |
| g                         | 5025400                 | a                    | 5042695                   | a                | 4992705               | ns                | UTI89/AS                    | rec38               | a                                    | UTI89                                 | ++                         | a      | a    |     | a        | a       | a    | a      |      | a         | a  |          | a      | a     | a      | a   | a       | a    | a        | a       | a         | a       | a        | a         |   |
| t                         | 5025401                 | c                    | 5042696                   | c                | 4992706               | ns                | UTI89/AS                    | rec38               | c                                    | UTI89                                 | ++++                       | c      | c    |     | c        | c       | c    | c      |      | c         | c  |          | c      | c     | c      | c   | c       | c    | c        | c       | c         | c       | c        | c         |   |
| t                         | 5025440                 | g                    | 5042735                   | g                | 4992745               | s                 | UTI89/AS                    | rec38               | g                                    | UTI89                                 | +                          | g      | g    |     | g        | g       | g    | g      |      | g         | g  |          | g      | g     | g      | g   | g       | g    | g        | g       | g         | g       | g        | g         | g |
| t                         | 5025458                 | c                    | 5042753                   | c                | 4992763               | s                 | UTI89/AS                    | rec38               | c                                    | UTI89                                 | +                          | c      | t    |     | c        | c       | t    | a      |      | c         | a  |          | a      | c     | c      | a   | t       | a    | a        | a       | a         | a       | a        | a         | a |
| c                         | 5025492                 | a                    | 5042787                   | a                | 4992797               | ns                | UTI89/AS                    | rec38               | a                                    | UTI89                                 | ++                         | c      | a    |     | a        | c       | c    | a      |      | a         | a  |          | a      | a     | a      | a   | a       | a    | a        | a       | a         | a       | a        | a         |   |
| a                         | 5025493                 | t                    | 5042788                   | t                | 4992798               | ns                | UTI89/AS                    | rec38               | a                                    | AS                                    | +                          | a      | g    |     | t        | a       | a    | g      |      | t         | t  |          | t      | t     | t      | t   | a       | g    | g        | g       | g         | g       | g        | g         | g |
| t                         | 5025503                 | c                    | 5042798                   | c                | 4992808               | s                 | UTI89/AS                    | rec38               | c                                    | UTI89                                 | +                          | t      | c    |     | c        | t       | t    | t      |      | c         | c  |          | c      | c     | c      | c   | c       | c    | c        | c       | c         | c       | c        | c         |   |
| a                         | 5025512                 | g                    | 5042807                   | g                | 4992817               | ns                | UTI89/AS                    | rec38               | g                                    | UTI89                                 | +                          | a      | g    |     | g        | a       | a    | a      |      | g         | g  |          | g      | g     | g      | g   | g       | g    | g        | g       | g         | g       | g        | g         | g |
| t                         | 5025556                 | g                    | 5042851                   | g                | 4992861               | ns                | UTI89/AS                    | rec38               | g                                    | UTI89                                 | +                          | t      | g    |     | g        | t       | t    | c      |      | g         | g  |          | c      | c     | c      | c   | t       | c    | c        | c       | g         | g       | g        | g         |   |
| a                         | 5025558                 | t                    | 5042853                   | t                | 4992863               | ns                | UTI89/AS                    | rec38               | t                                    | UTI89                                 | +                          | a      | t    |     | t        | a       | a    | t      |      | t         | t  |          | t      | t     | t      | t   | a       | t    | t        | t       | t         | t       | t        | t         |   |
| t                         | 5025564                 | a                    | 5042859                   | a                | 4992869               | ns                | UTI89/AS                    | rec38               | a                                    | UTI89                                 | +                          | t      | a    |     | a        | t       | t    | c      |      | a         | a  |          | c      | c     | c      | c   | t       | t    | t        | t       | a         | a       | a        | a         | a |
| t                         | 5025566                 | c                    | 5042861                   | c                | 4992871               | ns                | UTI89/AS                    | rec38               | c                                    | UTI89                                 | +                          | t      | c    |     | c        | t       | t    | c      |      | c         | c  |          | c      | c     | c      | c   | t       | c    | c        | c       | c         | c       | c        | c         | c |
| t                         | 5025567                 | c                    | 5042862                   | c                | 4992872               | ns                | UTI89/AS                    | rec38               | c                                    | UTI89                                 | +                          | t      | c    |     | c        | t       | t    | c      |      | c         | c  |          | c      | c     | c      | c   | t       | c    | c        | c       | c         | c       | c        | c         | c |
| c                         | 5025571                 | t                    | 5042866                   | t                | 4992876               | ns                | UTI89/AS                    | rec38               | t                                    | UTI89                                 | +                          | c      | t    |     | t        | c       | c    | t      |      | t         | t  |          | t      | t     | t      | t   | c       | t    | t        | t       | t         | t       | t        | t         | t |
| c                         | 5029997                 | t                    | 5046927                   | t                | 4996937               | nc                | UTI89/AS                    | rec38               | t                                    | UTI89                                 | +                          | t      | t    |     | t        | t       | t    |        |      |           |    |          |        |       |        | t   |         |      |          |         |           |         |          |           |   |
| t                         | 5030011                 | c                    | 5046941                   | c                | 4996951               | nc                | UTI89/AS                    | rec38               | c                                    | UTI89                                 | +++                        | c      | c    |     | c        | c       | c    |        |      |           |    |          |        |       |        | c   |         |      |          |         |           |         |          |           |   |
| c                         | 5030055                 | t                    | 5046985                   | t                | 4996995               | ns                | UTI89/AS                    | rec38               | c                                    | AS                                    | +++                        | c      | c    |     | c        | c       | c    |        |      |           |    |          |        |       |        | c   |         |      |          |         |           |         |          |           |   |
| c                         | 5030079                 | t                    | 5047009                   | t                | 4997019               | ns                | UTI89/AS                    | rec38               | t                                    | UTI89                                 | +                          | t      | t    |     | t        | t       | t    |        |      |           |    |          |        |       |        | t   |         |      |          |         |           |         |          |           |   |
| t                         | 5030085                 | c                    | 5047015                   | c                | 4997025               | ns                | UTI89/AS                    | rec38               | t                                    | AS                                    | +                          | c      | t    |     | t        | t       |      |        |      |           |    |          |        |       |        | c   |         |      |          |         |           |         |          |           |   |
| t                         | 5030133                 | a                    | 5047063                   | a                | 4997073               | ns                | UTI89/AS                    | rec38               | a                                    | UTI89                                 | ++                         | g      | a    |     | a        | a       |      |        |      |           |    |          |        |       |        | t   |         |      |          |         |           |         |          |           |   |
| t                         | 5030166                 | g                    | 5047096                   | g                | 4997106               | ns                | UTI89/AS                    | rec38               | g                                    | UTI89                                 | +++                        | g      | g    |     | g        | g       |      |        |      |           |    |          |        |       |        | g   |         |      |          |         |           |         |          |           |   |
| t                         | 5030169                 | c                    | 5047099                   | c                | 4997109               | ns                | UTI89/AS                    | rec38               | t                                    | AS                                    | +                          | c      | t    |     | c        | c       |      |        |      |           |    |          |        |       |        | g   |         |      |          |         |           |         |          |           |   |
| a                         | 5030172                 | g                    | 5047102                   | g                | 4997112               | ns                | UTI89/AS                    | rec38               | g                                    | UTI89                                 | +                          | g      | t    |     | t        |         |      |        |      |           |    |          |        |       |        | a   |         |      |          |         |           |         |          |           |   |
| t                         | 5030200                 | g                    | 5047130                   | g                | 4997140               | ns                | UTI89/AS                    | rec38               | g                                    | UTI89                                 | +++                        | g      | g    |     | g        | g       |      |        |      |           |    |          |        |       |        | g   |         |      |          |         |           |         |          |           |   |
| t                         | 5030332                 | c                    | 5047262                   | c                | 4997272               | ns                | UTI89/AS                    | rec38               | c                                    | UTI89                                 | ++++                       | c      |      |     | c        | c       | c    | c      |      | c         | c  |          | c      |       |        | c   | c       | c    |          |         |           |         |          |           |   |
| c                         | 5030335                 | t                    | 5047265                   | t                | 4997275               | ns                | UTI89/AS                    | rec38               | t                                    | UTI89                                 | +                          | t      |      |     | t        | t       | t    | t      |      | t         | t  |          | t      |       |        | t   | t       | t    |          |         |           |         |          |           |   |
| g                         | 5032799                 | a                    | 5049064                   | a                | 4999074               | ns                | UTI89/AS                    | rec39               | a                                    | UTI89                                 | ++++                       | a      |      |     | a        | a       | a    | a      |      | a         | a  |          | a      | a     | a      | a   | a       | a    | a        | a       | a         | a       | a        | -         |   |
| c                         | 5032827                 | t                    | 5049092                   | t                | 4999102               | s                 | UTI89/AS                    | rec39               | t                                    | UTI89                                 | +                          | t      |      |     | t        | t       | t    | t      |      | t         | t  |          | t      | t     | t      | t   | c       | c    | c        | c       | c         | c       | c        | c         |   |
| a                         | 5032879                 | c                    | 5049144                   | c                | 4999154               | nc                | UTI89/AS                    | rec39               | c                                    | UTI89                                 | +                          | c      |      |     | t        | t       | t    | t      |      | c         | c  |          | c      | c     | c      | c   | t       | t    | t        | t       | c         | a       |          |           |   |
| c                         | 5032891                 | t                    | 5049156                   | t                | 4999166               | nc                | UTI89/AS                    | rec39               | t                                    | UTI89                                 | +                          | t      |      |     | t        | t       | t    | t      |      | t         | t  |          | t      | t     | t      | t   | c       | c    | c        | c       | c         | c       | c        | c         |   |
| t                         | 5032963                 | c                    | 5049228                   | c                | 4999238               | ns                | UTI89/AS                    | rec39               | c                                    | UTI89                                 | ++++                       | c      |      |     | c        |         |      |        |      | c         | c  |          | c      | c     | c      | c   | c       | c    | c        | c       | c         | c       | c        | c         |   |
| t                         | 5032996                 | g                    | 5049261                   | g                | 4999271               | ns                | UTI89/AS                    | rec39               | g                                    | UTI89                                 | ++++                       | g      |      |     | g        |         |      |        |      | g         | g  |          | g      | g     | g      | g   | g       | g    | g        | g       | g         | g       | g        | g         |   |
| c                         | 5032997                 | g                    | 5049262                   | g                | 4999272               | s                 | UTI89/AS                    | rec39               | g                                    | UTI89                                 | ++++                       | g      |      |     | g        |         |      |        |      | g         | g  |          | g      | g     | g      | g   | g       | g    | g        | g       | g         | g       | g        | g         |   |
| a                         | 5033003                 | g                    | 5049268                   | g                | 4999278               | s                 | UTI89/AS                    | rec39               | g                                    | UTI89                                 | ++++                       | g      |      |     | g        |         |      |        |      | g         | g  |          | g      | g     | g      | g   | g       | g    | g        | g       | g         | g       | g        | g         |   |
| t                         | 5033027                 | c                    | 5049292                   | c                | 4999302               | s                 | UTI89/AS                    | rec39               | c                                    | UTI89                                 | ++++                       | c      |      |     | c        |         |      |        |      | c         | c  |          | c      | c     | c      | c   | c       | c    | c        | c       | c         | c       | c        | c         |   |
| c                         | 5033057                 | t                    | 5049322                   | t                | 4999332               | s                 | UTI89/AS                    | rec39               | t                                    | UTI89                                 | +                          | t      |      |     | t        |         |      |        |      | t         | t  |          | t      | t     | t      | t   | t       | t    | t        | t       | t         | t       | t        | t         |   |
| g                         | 5033105                 | a                    | 5049370                   | a                | 4999380               | ns                | UTI89/AS                    | rec39               | g                                    | AS                                    | ++++                       | g      |      |     | a        |         |      |        |      | a         | a  |          | a      | a     | a      | a   | a       | a    | a        | a       | a         | a       | a        | a         |   |
| t                         | 5033106                 | g                    | 5049371                   | g                | 4999381               | ns                | UTI89/AS                    | rec39               | g                                    | UTI89                                 | ++++                       | g      |      |     | g        |         |      |        |      | g         | g  |          | g      | g     | g      | g   | g       | g    | g        | g       | g         | g       | g        | g         |   |
| t                         | 5033148                 | a                    | 5049413                   | a                | 4999423               | nc                | UTI89/AS                    | rec39               | c                                    | U/AS                                  | +/-                        | c      |      |     | t        |         |      |        |      | a         | g  |          | a      | g     | g      | a   | a       | a    | a        | a       | a         | a       | a        | a         |   |
| t                         | 5033157                 | c                    | 5049422                   | c                | 4999432               | nc                | UTI89/AS                    | rec39               | t                                    | AS                                    | +                          | t      |      |     | t        |         |      |        |      |           |    |          | c      | t     | t      |     | c       | c    | c        | c       | c         | c       | c        | c         |   |
| a                         | 5033176                 | g                    | 5049441                   | g                | 4999451               | nc                | UTI89/AS                    | rec39               | a                                    | AS                                    | ++                         | a      |      |     | c        |         |      |        |      |           |    |          | g      | a     | a      |     | a       | a    | g        | a       | a         | a       | a        | a         |   |
| g                         | 5033191                 | a                    | 5049456                   | a                | 4999466               | nc                | UTI89/AS                    | rec39               | g                                    | AS                                    | ++                         | g      |      |     | c        |         |      |        |      |           |    |          | a      | a     | a      |     | a       | a    | a        | a       | a         | a       | a        | a         |   |
| g                         | 5033213                 | a                    | 5049478                   | a                | 4999488               | nc                | UTI89/AS                    | rec39               | a                                    | UTI89                                 | +                          |        |      |     | a        |         |      |        |      |           |    |          | a      |       |        |     |         |      |          |         |           |         |          |           |   |
| t                         | 5033214                 | c                    | 504947                    |                  |                       |                   |                             |                     |                                      |                                       |                            |        |      |     |          |         |      |        |      |           |    |          |        |       |        |     |         |      |          |         |           |         |          |           |   |

Table S8. Allocation of recombinational SNPs to lineages by virtual outgroup analysis<sup>a</sup>

| ExPEC genome site details |                         |                      |                           |                  |                       |                   |                              |                     |                                      | Outgroup Strains Details <sup>1</sup> |                            |        |      |     |          |         |      |        |      |           |    |          |        |       |        |     |         |      |          |         |           |         |          |           |   |   |
|---------------------------|-------------------------|----------------------|---------------------------|------------------|-----------------------|-------------------|------------------------------|---------------------|--------------------------------------|---------------------------------------|----------------------------|--------|------|-----|----------|---------|------|--------|------|-----------|----|----------|--------|-------|--------|-----|---------|------|----------|---------|-----------|---------|----------|-----------|---|---|
| UT189 <sup>b</sup>        | UT189 site <sup>c</sup> | APEC 01 <sup>b</sup> | APEC 01 site <sup>c</sup> | S88 <sup>b</sup> | S88 site <sup>c</sup> | type <sup>d</sup> | Event Lineage <sup>e,f</sup> | Recombinant segment | Inferred ancestral base <sup>g</sup> | Outgroup Analysis <sup>g</sup>        | Support level <sup>h</sup> | CFT073 | ED1a | 536 | E2348/69 | SMS 3-5 | IA39 | UMN026 | K-12 | ATCC 8739 | HS | D1 Sd197 | CB9615 | Sakai | EDL933 | IA1 | E24377A | SE11 | SS Sd046 | F2a 301 | F2a 2457T | F5 8401 | B4 Sd227 | B18 BS512 |   |   |
| t                         | 5034442                 | t                    | 5050707                   | g                | 5000717               | s                 | S88                          | rec40               | g                                    | 2                                     | -                          | g      | t    | g   | t        | t       | g    | g      | g    | g         | g  | t        | g      | g     | g      | t   | g       | g    | g        | g       | g         | g       | g        | g         |   |   |
| t                         | 5034454                 | t                    | 5050719                   | c                | 5000729               | s                 | S88                          | rec40               | c                                    | 2                                     | -                          | c      | t    | c   | t        | t       | c    | c      | c    | c         | c  | c        | c      | c     | c      | c   | c       | c    | c        | c       | c         | c       | c        | c         |   |   |
| t                         | 5034457                 | t                    | 5050722                   | c                | 5000732               | s                 | S88                          | rec40               | c                                    | 2                                     | -                          | c      | t    | c   | t        | t       | c    | c      | c    | c         | c  | c        | c      | c     | c      | c   | c       | c    | c        | c       | c         | c       | c        | c         |   |   |
| g                         | 5034541                 | g                    | 5050806                   | a                | 5000816               | s                 | S88                          | rec40               | g                                    | S88                                   | ++                         | g      | g    | g   | g        | g       | g    | g      | g    | g         | g  | a        | g      | a     | a      | a   | a       | a    | a        | a       | a         | a       | a        | a         |   |   |
| g                         | 5034649                 | g                    | 5050914                   | a                | 5000924               | s                 | S88                          | rec40               | g                                    | S88                                   | ++                         | g      | g    | g   | g        | g       | g    | g      | g    | g         | a  | g        | a      | a     | a      | a   | a       | a    | a        | a       | a         | a       | a        | a         |   |   |
| t                         | 5034665                 | t                    | 5050930                   | c                | 5000940               | s                 | S88                          | rec40               | c                                    | 2                                     | -                          | c      | t    | c   | c        | c       | c    | c      | c    | c         | c  | t        | c      | c     | c      | c   | c       | t    | t        | c       | c         | c       | c        | c         |   |   |
| c                         | 5034676                 | c                    | 5050941                   | t                | 5000951               | s                 | S88                          | rec40               | c                                    | S88                                   | +++                        | c      | c    | c   | c        | c       | t    | t      | t    | t         | t  | t        | t      | t     | t      | t   | t       | t    | t        | t       | t         | t       | t        | t         |   |   |
| g                         | 5034679                 | g                    | 5050944                   | a                | 5000954               | s                 | S88                          | rec40               | g                                    | S88                                   | ++                         | g      | g    | g   | g        | a       | g    | g      | g    | a         | g  | a        | g      | g     | g      | g   | g       | a    | t        | g       | g         | g       | t        | t         |   |   |
| g                         | 5034790                 | g                    | 5051055                   | a                | 5001065               | s                 | S88                          | rec40               | g                                    | S88                                   | ++                         | g      | g    | g   | g        | g       | g    | g      | g    | a         | g  | g        | a      | a     | a      | a   | g       | g    | g        | g       | a         | a       | g        | g         | g |   |
| g                         | 5034901                 | g                    | 5051166                   | a                | 5001176               | s                 | S88                          | rec40               | g                                    | S88                                   | ++                         | g      | g    | g   | g        | g       | g    | g      | g    | a         | g  | g        | a      | a     | a      | a   | g       | a    | g        | a       | a         | a       | g        | g         | g |   |
| a                         | 5035052                 | a                    | 5051317                   | c                | 5001327               | nc                | S88                          | rec40               | a                                    | S88                                   | +++                        | a      | a    | a   | a        | c       | a    | a      | c    | c         | c  | c        | a      | c     | c      | c   | c       | c    | c        | c       | c         | c       | c        | c         | c |   |
| a                         | 5035101                 | a                    | 5051366                   | g                | 5001376               | nc                | S88                          | rec40               | a                                    | S88                                   | ++                         | a      | a    | a   | a        | a       | a    | a      | g    | a         | a  | a        | g      | g     | g      | a   | a       | a    | g        | g       | g         | a       | a        | a         | a |   |
| a                         | 5035162                 | a                    | 5051427                   | nc               | 5001437               | nc                | S88                          | rec40               | c                                    | 2                                     | -                          | c      | c    | c   | c        | c       | c    | c      | c    | c         | c  | c        | c      | c     | c      | c   | c       | c    | c        | c       | c         | c       | c        | c         |   |   |
| c                         | 5035224                 | c                    | 5051489                   | t                | 5001499               | nc                | S88                          | rec40               | c                                    | S88                                   | +++                        | c      | c    | c   | c        | c       | c    | c      | c    | t         | c  | c        | c      | c     | t      | t   | c       | c    | c        | c       | c         | c       | c        | c         | c |   |
| a                         | 5035425                 | a                    | 5051690                   | g                | 5001700               | s                 | S88                          | rec40               | a                                    | S88                                   | ++                         | a      | a    | a   | a        | g       | g    | g      | g    | g         | g  | a        | g      | g     | g      | g   | g       | g    | g        | g       | g         | g       | g        | g         | g |   |
| c                         | 5035581                 | c                    | 5051846                   | a                | 5001856               | s                 | S88                          | rec40               | c                                    | S88                                   | ++                         | c      | c    | c   | c        | c       | c    | c      | c    | a         | c  | c        | c      | c     | c      | c   | c       | c    | c        | c       | c         | c       | c        | c         | c |   |
| t                         | 5035632                 | t                    | 5051897                   | c                | 5001907               | s                 | S88                          | rec40               | t                                    | S88                                   | ++++                       | t      | t    | t   | t        | c       | t    | c      | c    | t         | t  | c        | c      | c     | c      | c   | c       | c    | c        | c       | c         | c       | c        | c         | c |   |
| g                         | 5035647                 | g                    | 5051912                   | a                | 5001922               | s                 | S88                          | rec40               | g                                    | S88                                   | ++                         | g      | g    | g   | g        | a       | g    | a      | a    | a         | a  | a        | a      | a     | a      | a   | a       | a    | a        | a       | a         | a       | a        | a         | a |   |
| t                         | 5035665                 | t                    | 5051930                   | c                | 5001940               | s                 | S88                          | rec40               | t                                    | S88                                   | ++++                       | t      | t    | t   | t        | c       | t    | c      | c    | c         | c  | c        | c      | c     | c      | c   | c       | c    | c        | c       | c         | c       | c        | c         | c |   |
| g                         | 5035671                 | g                    | 5051936                   | a                | 5001946               | s                 | S88                          | rec40               | g                                    | S88                                   | ++                         | g      | g    | g   | g        | a       | g    | a      | a    | a         | a  | a        | a      | a     | a      | a   | a       | a    | a        | a       | a         | a       | a        | a         | a |   |
| c                         | 5035674                 | c                    | 5051939                   | a                | 5001949               | s                 | S88                          | rec40               | c                                    | S88                                   | ++                         | c      | c    | c   | c        | c       | c    | g      | g    | g         | g  | c        | g      | g     | g      | g   | g       | c    | g        | c       | c         | c       | c        | c         | c |   |
| t                         | 5035725                 | t                    | 5051990                   | g                | 5002000               | s                 | S88                          | rec40               | t                                    | S88                                   | ++                         | t      | t    | t   | t        | t       | t    | t      | t    | g         | t  | t        | t      | t     | t      | t   | t       | g    | g        | g       | g         | g       | g        | g         | g |   |
| a                         | 5035731                 | a                    | 5051996                   | g                | 5002006               | s                 | S88                          | rec40               | a                                    | S88                                   | ++                         | a      | a    | g   | g        | a       | g    | g      | g    | g         | g  | g        | g      | g     | g      | g   | g       | g    | g        | g       | g         | g       | g        | g         | g |   |
| t                         | 5035755                 | t                    | 5052020                   | c                | 5002030               | s                 | S88                          | rec40               | t                                    | S88                                   | ++                         | t      | t    | c   | c        | c       | t    | c      | c    | c         | c  | c        | c      | c     | c      | c   | c       | c    | c        | c       | c         | c       | c        | c         | c |   |
| a                         | 5035785                 | a                    | 5052050                   | g                | 5002060               | s                 | S88                          | rec40               | a                                    | S88                                   | ++                         | a      | a    | g   | g        | a       | g    | g      | g    | g         | g  | g        | g      | g     | g      | g   | g       | g    | g        | g       | g         | g       | g        | g         | g | g |
| t                         | 5035788                 | t                    | 5052053                   | c                | 5002063               | s                 | S88                          | rec40               | t                                    | S88                                   | +++                        | t      | t    | t   | c        | c       | t    | c      | c    | c         | c  | c        | c      | c     | c      | c   | c       | c    | c        | c       | c         | c       | c        | c         | c | c |
| c                         | 5035791                 | c                    | 5052056                   | t                | 5002066               | s                 | S88                          | rec40               | c                                    | S88                                   | +++                        | c      | c    | c   | t        | t       | c    | t      | t    | t         | t  | t        | t      | t     | t      | t   | t       | t    | t        | t       | t         | t       | t        | t         | t | t |
| t                         | 5035794                 | t                    | 5052059                   | c                | 5002069               | s                 | S88                          | rec40               | t                                    | S88                                   | +++                        | t      | t    | t   | c        | t       | c    | c      | c    | c         | c  | c        | c      | c     | c      | c   | c       | c    | c        | c       | c         | c       | c        | c         | c | c |
| t                         | 5035830                 | t                    | 5052095                   | c                | 5002105               | s                 | S88                          | rec40               | t                                    | S88                                   | ++++                       | t      | t    | t   | t        | c       | t    | c      | c    | c         | c  | c        | c      | c     | c      | c   | c       | c    | c        | c       | c         | c       | c        | c         | c | c |
| c                         | 5035839                 | c                    | 5052104                   | t                | 5002114               | s                 | S88                          | rec40               | c                                    | S88                                   | +++                        | c      | c    | c   | c        | c       | c    | c      | c    | t         | t  | t        | t      | t     | t      | t   | t       | t    | t        | t       | t         | t       | t        | t         | t | t |
| a                         | 5035857                 | a                    | 5052122                   | c                | 5002132               | s                 | S88                          | rec40               | a                                    | S88                                   | ++++                       | a      | a    | a   | a        | a       | a    | c      | c    | a         | c  | a        | a      | a     | a      | a   | a       | c    | c        | a       | a         | a       | a        | a         | a | a |
| g                         | 5035872                 | g                    | 5052137                   | a                | 5002147               | s                 | S88                          | rec40               | g                                    | S88                                   | ++                         | g      | g    | g   | g        | g       | g    | g      | g    | a         | g  | g        | a      | a     | a      | a   | g       | g    | g        | a       | a         | a       | g        | a         | a | a |
| c                         | 5035875                 | c                    | 5052140                   | t                | 5002150               | s                 | S88                          | rec40               | c                                    | S88                                   | ++++                       | c      | c    | c   | c        | c       | c    | c      | c    | t         | c  | c        | t      | t     | t      | t   | c       | c    | c        | t       | t         | t       | c        | t         | t | t |
| a                         | 5035962                 | a                    | 5052227                   | t                | 5002237               | nc                | S88                          | rec40               | a                                    | S88                                   | +++                        | a      | a    | a   | a        | a       | a    | t      | t    | t         | t  | t        | t      | t     | t      | t   | t       | t    | t        | t       | t         | t       | t        | t         | t | t |
| c                         | 5035966                 | c                    | 5052231                   | t                | 5002241               | nc                | S88                          | rec40               | c                                    | S88                                   | ++                         | c      | c    | c   | c        | c       | c    | c      | c    | c         | c  | c        | c      | c     | c      | c   | c       | c    | c        | c       | c         | c       | c        | c         | c | c |
| t                         | 5036151                 | t                    | 5052416                   | c                | 5002426               | s                 | S88                          | rec40               | t                                    | S88                                   | +++                        | t      | t    | t   | t        | t       | t    | c      | c    | c         | c  | c        | c      | c     | c      | c   | c       | c    | c        | c       | c         | c       | c        | c         | c | c |
| g                         | 5036428                 | g                    | 5052693                   | a                | 5002703               | s                 | S88                          | rec40               | g                                    | S88                                   | ++                         | g      | g    | g   | g        | g       | a    | a      | a    | a         | g  | a        | a      | a     | a      | a   | a       | a    | a        | a       | a         | a       | a        | a         | a | a |
| t                         | 5036431                 | t                    | 5052696                   | a                | 5002706               | s                 | S88                          | rec40               | t                                    | S88                                   | +++                        | t      | t    | t   | t        | t       | t    | a      | a    | a         | a  | t        | a      | a     | a      | a   | a       | a    | a        | a       | a         | a       | a        | a         | a | a |
| a                         | 5036458                 | a                    | 5052723                   | g                | 5002733               | s                 | S88                          | rec40               | a                                    | S88                                   | ++                         | a      | a    | a   | g        | g       | a    | g      | g    | g         | g  | g        | g      | g     | g      | g   | g       | g    | g        | g       | g         | g       | g        | g         | g | g |
| a                         | 5036565                 | a                    | 5052830                   | t                | 5002840               | ns                | S88                          | rec40               | a                                    | S88                                   | ++++                       | a      | a    | a   | a        | a       | a    | a      | t    | t         | a  | a        | t      | a     | a      | a   | a       | t    | a        | a       | t         | t       | t        | t         | t | t |
| t                         | 5036608                 | t                    | 5052873                   | c                | 5002883               | s                 | S88                          | rec40               | t                                    | S88                                   | +++                        | t      | t    | t   | t        | c       | t    | c      | c    | c         | c  | c        | c      | c     | c      | c   | c       | c    | c        | c       | c         | c       | c        | c         | c | c |
| c                         | 5036611                 | c                    | 5052876                   | t                | 5002886               | s                 | S88                          | rec40               | c                                    | S88                                   | +++                        | c      | c    | c   | c        | c       | c    | t      | t    | c         | t  | t        | t      | t     | t      | t   | t       | t    | t        | t       | t         | t       | t        | t         | t | t |
| c                         | 5036695                 | c                    | 5052960                   | t                | 5002970               | s                 | S88                          | rec40               | c                                    | S88                                   | ++                         | c      | c    | c   | c        | c       | c    | c      | t    | t         | c  | c        | c      | c     | c      | c   | c       | c    | c        | c       | c         | c       | c        | c         | c | c |
| c                         | 5036722                 | c                    | 5052987                   | t                | 5002997               | s                 | S88                          | rec40               | c                                    | S88                                   | ++                         | c      | c    | t   | t        | t       | t    | t      | t    | t         | t  | t        | t      | t     | t      | t   | t       | t    | t        | t       | t         | t       | t        | t         | t | t |
| a                         | 5036728                 | a                    | 5052993                   | c                | 5003003               | s                 | S88                          | rec40               | a                                    | S88                                   | +++                        | a      | a    | a   | a        | t       | c    | a      | c    | c         | c  | c        | c      | c     | c      | c   | c       | c    | c        | c       | c         | c       | c        | c         | c | c |
| a                         | 5036737                 | a                    | 5053002                   | g                | 5003012               | s                 | S88                          | rec40               | a                                    | S88                                   | ++                         | a      | a    | a   | a        | g       | a    | g      | g    | g         | g  | g        | g      | g     | g      | g   | g       | g    | g        | g       | g         | g       | g        | g         | g | g |
| t                         | 5036788                 | t                    | 5053053                   | c                | 5003063               | s                 | S88                          | rec40               | t                                    | S88                                   | +++                        | t      | g    | t   | t        | c       | t    | t      | c    | c         | c  | c        | c      | c     | c      | c   | c       | c    | c        | c       | c         | c       | c        | c         | c | c |
| g                         | 5036806                 | g                    | 5053071                   | a                | 5003081               | s                 | S88                          | rec40               | g                                    | S88                                   | ++                         | g      | g    | g   | g        | a       | a    | a      | a    | a         | a  | a        | a      | a     | a      | a   | a       | a    | a        | a       | a         | a       | a        | a         | a | a |
| t                         | 5036812                 | t                    | 5053077                   | c                | 5003087               | s                 | S88                          | rec40               | t                                    | S88                                   | +++                        | t      | t    | t   | t        | c       | t    | c      | c    | c         | c  | c        | c      | c     | c      | c   | c       | c    | c        | c       | c         | c       | c        | c         | c | c |
| t                         | 5036890                 | t                    | 5053155                   | c                | 5003165               | s                 | S88                          | rec40               | t                                    | S88                                   | +++                        | t      | t    | t   | t        | c       | t    | c      | c    | c         | c  | c        | c      | c     | c      | c   | c       | c    | c        | c       | c         | c       | c        | c         | c | c |
| t                         | 5036908                 | t                    | 5053173                   | c                | 5003183               | s                 | S88                          | rec40               | t                                    | S88                                   | +++                        | t      | t    | t   | t        | c       | t    | c      | c    | c         | c  | c        | c      | c     | c      | c   | c       | c    | c        | c       | c         | c       | c        | c         | c | c |
| c                         | 5036926                 | c                    | 5053191                   | t                | 5003201               | s                 | S88                          | rec40               | c                                    | S88                                   | +++                        | c      | c    | c   | c        | c       | c    | c      | c    | c         | t  | t        | t      | c     | t      | t   | t       | t    | t        | t       | t         | t       | t        | t         | t | t |
| t                         | 5036943                 | t                    | 5053208                   | c                | 5003218               | ns                | S88                          | rec40               | c                                    | 2                                     | -                          | c      | c    | c   |          |         |      |        |      |           |    |          |        |       |        |     |         |      |          |         |           |         |          |           |   |   |

Page 52

[illegible]

Page 53

Page 54

| ExPEC genome site details |                         |                      |                           |                  |                       |                   |                             |                     |                                      | Outgroup Strains Details <sup>i</sup> |                            |        |      |     |          |         |       |        |      |           |    |          |        |       |        |     |         |      |          |         |           |         |          |           |   |   |
|---------------------------|-------------------------|----------------------|---------------------------|------------------|-----------------------|-------------------|-----------------------------|---------------------|--------------------------------------|---------------------------------------|----------------------------|--------|------|-----|----------|---------|-------|--------|------|-----------|----|----------|--------|-------|--------|-----|---------|------|----------|---------|-----------|---------|----------|-----------|---|---|
| UT189 <sup>b</sup>        | UT189 site <sup>c</sup> | APEC 01 <sup>b</sup> | APEC 01 site <sup>c</sup> | S88 <sup>b</sup> | S88 site <sup>c</sup> | type <sup>d</sup> | Event Lineage <sup>ef</sup> | Recombinant segment | Inferred ancestral base <sup>g</sup> | Outgroup Analysis <sup>g</sup>        | Support level <sup>h</sup> | CFT073 | ED1a | 536 | E2348/69 | SMS 3-5 | IAI39 | UMN026 | K-12 | ATCC 8739 | HS | D1 Sd197 | CB9615 | Sakai | EDL933 | IA1 | E24377A | SE11 | SS Ss046 | F2a 301 | F2a 2457T | F5 8401 | B4 Sb227 | B18 RS512 |   |   |
| c                         | 5046924                 | c                    | 5063189                   | t                | 5013451               | s                 | S88                         | rec40               | c                                    | S88                                   | ++                         | c      | c    | c   | c        | c       | c     | c      | c    | t         | c  | c        | c      | c     | c      | c   | c       | c    | c        | c       | c         | c       | c        | c         | c |   |
| a                         | 5046957                 | a                    | 5063222                   | g                | 5013484               | s                 | S88                         | rec40               | a                                    | S88                                   | ++                         | g      | a    | a   | g        | g       | a     | g      | g    | g         | g  | a        | g      | g     | g      | g   | g       | g    | g        | g       | g         | g       | g        | g         | g |   |
| c                         | 5047142                 | c                    | 5063407                   | t                | 5013669               | ns                | S88                         | rec40               | c                                    | S88                                   | ++                         | c      | c    | c   | c        | c       | c     | c      | c    | c         | c  | c        | c      | c     | c      | c   | c       | c    | c        | c       | c         | c       | c        | c         | c |   |
| t                         | 5047236                 | t                    | 5063501                   | c                | 5013763               | s                 | S88                         | rec40               | t                                    | S88                                   | ++                         | c      | t    | t   | c        | c       | c     | c      | c    | c         | c  | c        | c      | c     | c      | c   | c       | c    | c        | c       | c         | c       | c        | c         | c |   |
| g                         | 5047238                 | g                    | 5063503                   | a                | 5013765               | s                 | S88                         | rec40               | g                                    | S88                                   | ++                         | g      | g    | g   | g        | g       | g     | g      | g    | a         | g  | g        | g      | g     | g      | g   | g       | g    | g        | g       | g         | g       | g        | g         | g |   |
| a                         | 5047241                 | a                    | 5063506                   | g                | 5013768               | s                 | S88                         | rec40               | a                                    | S88                                   | ++                         | a      | a    | a   | a        | g       | a     | a      | g    | g         | g  | g        | g      | g     | g      | g   | g       | g    | g        | g       | g         | g       | g        | g         | g |   |
| t                         | 5047242                 | t                    | 5063507                   | c                | 5013769               | s                 | S88                         | rec40               | t                                    | S88                                   | +++                        | t      | t    | t   | t        | c       | t     | t      | c    | c         | c  | c        | c      | c     | c      | c   | c       | c    | c        | c       | c         | c       | c        | c         | c |   |
| c                         | 5047248                 | c                    | 5063513                   | g                | 5013775               | s                 | S88                         | rec40               | c                                    | S88                                   | ++                         | g      | c    | c   | c        | g       | c     | c      | g    | g         | g  | g        | g      | g     | g      | g   | g       | g    | g        | g       | g         | g       | g        | g         | g |   |
| a                         | 5047251                 | a                    | 5063516                   | g                | 5013778               | s                 | S88                         | rec40               | a                                    | S88                                   | ++                         | g      | a    | a   | a        | g       | a     | a      | g    | g         | g  | g        | g      | g     | g      | g   | g       | g    | g        | g       | g         | g       | g        | g         | g |   |
| c                         | 5047269                 | c                    | 5063534                   | t                | 5013796               | s                 | S88                         | rec40               | c                                    | S88                                   | +++                        | t      | c    | c   | t        | t       | t     | t      | t    | c         | c  | c        | c      | c     | c      | c   | c       | c    | c        | c       | c         | c       | c        | c         | c |   |
| t                         | 5047272                 | t                    | 5063537                   | c                | 5013799               | s                 | S88                         | rec40               | t                                    | S88                                   | +++                        | c      | t    | t   | c        | c       | c     | c      | c    | c         | t  | t        | t      | t     | t      | t   | t       | t    | t        | t       | t         | t       | t        | t         | t |   |
| g                         | 5047275                 | g                    | 5063540                   | c                | 5013802               | s                 | S88                         | rec40               | g                                    | S88                                   | ++                         | g      | g    | g   | g        | c       | g     | c      | c    | c         | g  | g        | g      | a     | a      | a   | g       | g    | g        | a       | a         | a       | a        | a         | a | a |

<sup>a</sup> color in the table: white: the snps in unallocated blocks; green: the snps that supported the allocation of block; red: the snps that conflicted with the allocation of block; yellow: the unallocated snps or the snps that implies 2 mutations at that site - eg in the ancestor of O55 and O157 strains before isolation and again in one of the lineages in the allocated blocks.

<sup>b</sup> Numbers in place of bases indicates number of bases where >2 bases inserted or deleted. In these cases "-" indicates absence of these bases.

<sup>c</sup> For indels the base indicated is the base before the insertion or deletion in the strain.

<sup>d</sup> s: synonymous; ns: non-synonymous; nc: in non-coding gene; i: intergenic; ins: small insert; del: small deletion; indel: the small indels that can't be allocated

<sup>e</sup> AS: allocated to the lineage to the common ancestor of APEC 01 and S88; UT189/AS: allocated to the divergence between UT189 and the common ancestor of APEC 01 and S88 (strain not specified); APEC/S88: allocated to the divergence between APEC 01 and S88 lineages (lineage not specified).

<sup>f</sup> The recombinational block was allocated if more than 80% of the snps in it can be allocated into the same lineage.

<sup>g</sup> The base in the common ancestor of the 3 ExPEC strains as inferred from outgroup analysis.

<sup>h</sup> Level of support for allocation of mutation as given in previous column

++++ agreement is high - 8 or more outgroup strains with expected base and at most 1 with an alternative base, and at least 2 of the CFT073, ED1a and 536 support the expected base)

+++ agreement good - 4 or more outgroup strains with expected base and at most 1 with an alternative base, and at least 2 of the CFT073, ED1a and 536 support the expected base)

++ supported by at least 2 of the CFT073, ED1a and 536 regardless of situation with other outgroup strains

+ no conflict but very limited support as either site absent or conflict in all of CFT073, ED1a and 536, or conflict among them, and/or support is less than required for any of the higher levels of support.

+/- no conflict but no support (base not present in any outgroup OR base when present is not that in any of the ExPEC strains OR both alternative lineages supported equally).

- conflict data implies 2 mutations at that site - eg in the ancestor of 3 ExPEC strains before isolation and again in one of the lineages.

<sup>i</sup> Base, number or "-" indicates the base type or absence of the base. Blank means the site not present.
